# Supplementary material for: Assessing corporate transition plans using a production asset-based planning approach
Source: Research Square preprint supplement (doi:10.21203/rs.3.rs-5245457/v1), 2024-12-09
Supplement: Supplementary file 1 [file Supplementary_data sheet_steel_shared.xlsx]

## Sheet: EF Assumptions
Emission factors
		Model input
Country	Production route
Brazil	Integrated (BF-BOF)	2.19
Brazil	EAF-based	0.05
China	Integrated (BF-BOF)	1.76
China	EAF-based	0.03
EU	Integrated (BF-BOF)	1.77
EU	EAF-based	0.04
India	Integrated (BF-BOF)	3.72
India	EAF-based	0.07
Japan	Integrated (BF-BOF)	2.05
Japan	EAF-based	0.04
Russia	Integrated (BF-BOF)	2.79
Russia	EAF-based	0.07
Serbia	Integrated (BF-BOF)	2.06
Serbia	EAF-based	0.06
South Africa	Integrated (BF-BOF)	3.57
South Africa	EAF-based	0.12
South Korea	Integrated (BF-BOF)	2
South Korea	EAF-based	0.03
Switzerland	Integrated (BF-BOF)	NA
Switzerland	EAF-based	0.02
Taiwan	Integrated (BF-BOF)	2.02
Taiwan	EAF-based	0.02
Turkey	Integrated (BF-BOF)	2.17
Turkey	EAF-based	0.04
Ukraine	Integrated (BF-BOF)	2.3
Ukraine	EAF-based	0.04
United Kingdom	Integrated (BF-BOF)	2.05
United Kingdom	EAF-based	0.04
United States	Integrated (BF-BOF)	1.94
United States	EAF-based	0.04
Global	Integrated (BF-BOF)	2.31357
Global	EAF-based	0.0513333
Global	DRI-EAF (natural gas-based)	1.05
Global	DRI-EAF (coal-based)	3.1
Global	BF ironmaking only	1.43
Global	DRI ironmaking (natural gas-based) only	0.61
Global	BOF steelmaking only	0.2
Global	DRI-BOF	0.932
Novel low-carbon technologies
Global	H2-DRI	0.04
Global	H2-DRI-EAF	0.075
Germany	"tkH2Steel" project (DRI-BOF-natural gas)	0.932
Germany	"tkH2Steel" project (DRI-BOF-green H2)	0.248

## Sheet: Benchmarks
					2020	2021	2022	2023	2024	2025	2026	2027	2028	2029	2030	2031	2032	2033	2034	2035	2036	2037	2038	2039	2040	2041	2042	2043	2044	2045	2046	2047	2048	2049	2050	Cumulative CO2 emissions
REMIND-MAgPIE 3.2-4.6	Net Zero 2050	World	Emissions|CO2|Energy|Demand|Industry|Steel	Mt CO2/yr	2399.14	2272.97	2146.81	2020.64	1894.47	1768.31	1555.71	1343.12	1130.52	917.928	705.333	610.366	515.398	420.431	325.464	230.496	198.611	166.725	134.84	102.954	71.0689	62.1628	53.2566	44.3504	35.4442	26.5381	24.1107	21.6834	19.2561	16.8287	14.4014	21249.3
REMIND-MAgPIE 3.2-4.6	Below 2°C	World	Emissions|CO2|Energy|Demand|Industry|Steel	Mt CO2/yr	2399.14	2341.15	2283.16	2225.17	2167.18	2109.19	1979.09	1848.98	1718.88	1588.78	1458.68	1387.28	1315.89	1244.5	1173.11	1101.72	988.977	876.232	763.486	650.741	537.995	491.746	445.497	399.248	352.999	306.75	287.817	268.883	249.95	231.017	212.083	35405.3
GCAM 6.0 NGFS	Net Zero 2050	World	Emissions|CO2|Energy|Demand|Industry|Steel	Mt CO2/yr	2998.97	2929.9	2860.83	2791.75	2722.68	2653.61	2441.92	2230.23	2018.54	1806.85	1595.16	1426	1256.84	1087.67	918.509	749.346	672.143	594.939	517.736	440.533	363.329	328.371	293.413	258.455	223.497	188.538	180.362	172.185	164.009	155.832	147.655	37189.8
GCAM 6.0 NGFS	Below 2°C	World	Emissions|CO2|Energy|Demand|Industry|Steel	Mt CO2/yr	2998.97	2939.88	2880.79	2821.71	2762.62	2703.53	2527.45	2351.37	2175.29	1999.21	1823.13	1669.98	1516.83	1363.68	1210.54	1057.39	979.777	902.167	824.557	746.947	669.337	617.84	566.342	514.845	463.348	411.851	381.33	350.809	320.288	289.767	259.246	43100.8
MESSAGEix-GLOBIOM 1.1-M-R12	Net Zero 2050	World	Emissions|CO2|Energy|Demand|Industry|Steel	Mt CO2/yr	2866.05	2893.29	2920.53	2947.76	2975	3002.24	2961.59	2920.94	2880.28	2839.63	2798.98	2749.56	2700.13	2650.7	2601.28	2551.85	2496.27	2440.69	2385.1	2329.52	2273.94	2234.06	2194.19	2154.31	2114.44	2074.56	2029.97	1985.37	1940.78	1896.18	1851.58	77660.8
MESSAGEix-GLOBIOM 1.1-M-R12	Below 2°C	World	Emissions|CO2|Energy|Demand|Industry|Steel	Mt CO2/yr	2866.05	2893.29	2920.53	2947.76	2975	3002.24	2972.8	2943.37	2913.93	2884.5	2855.06	2830.34	2805.61	2780.89	2756.17	2731.44	2683.13	2634.82	2586.51	2538.2	2489.88	2454.65	2419.42	2384.19	2348.96	2313.73	2275.44	2237.14	2198.85	2160.56	2122.26	81926.7
REMIND-MAgPIE 3.2-4.6	Net Zero 2050	World	Production|Steel	Mt/yr	1951.58	1897.9	1844.22	1790.54	1736.87	1683.19	1633.33	1583.48	1533.63	1483.77	1433.92	1417.14	1400.36	1383.58	1366.8	1350.02	1345.8	1341.58	1337.36	1333.14	1328.92	1327.61	1326.3	1325	1323.69	1322.38	1335.97	1349.56	1363.14	1376.73	1390.31	45617.8
REMIND-MAgPIE 3.2-4.6	Below 2°C	World	Production|Steel	Mt/yr	1951.58	1930.07	1908.55	1887.04	1865.53	1844.02	1807.21	1770.41	1733.61	1696.81	1660	1658.41	1656.82	1655.23	1653.63	1652.04	1627.59	1603.14	1578.7	1554.25	1529.8	1536.76	1543.72	1550.68	1557.64	1564.6	1576.87	1589.14	1601.41	1613.68	1625.95	51984.9
GCAM 6.0 NGFS	Net Zero 2050	World	Production|Steel	Mt/yr	1752.2	1769.16	1786.12	1803.08	1820.04	1837	1840.21	1843.42	1846.63	1849.84	1853.05	1861.08	1869.1	1877.13	1885.16	1893.18	1893.74	1894.29	1894.85	1895.4	1895.95	1883.84	1871.72	1859.61	1847.49	1835.37	1830.37	1825.37	1820.37	1815.36	1810.36	57260.5
GCAM 6.0 NGFS	Below 2°C	World	Production|Steel	Mt/yr	1752.2	1771.53	1790.87	1810.21	1829.55	1848.88	1855.06	1861.25	1867.43	1873.61	1879.79	1886.29	1892.78	1899.28	1905.77	1912.27	1916.67	1921.07	1925.47	1929.87	1934.27	1932.88	1931.48	1930.08	1928.68	1927.29	1922.06	1916.83	1911.61	1906.38	1901.15	58472.6
MESSAGEix-GLOBIOM 1.1-M-R12	Net Zero 2050	World	Production|Steel	Mt/yr	2009.98	2049.43	2088.89	2128.34	2167.79	2207.24	2219.82	2232.41	2244.99	2257.58	2270.16	2284.46	2298.75	2313.05	2327.35	2341.64	2336.34	2331.04	2325.74	2320.44	2315.14	2315.82	2316.5	2317.18	2317.86	2318.54	2308.48	2298.41	2288.35	2278.29	2268.22	70098.3
MESSAGEix-GLOBIOM 1.1-M-R12	Below 2°C	World	Production|Steel	Mt/yr	2009.98	2049.43	2088.89	2128.34	2167.79	2207.24	2219.79	2232.34	2244.89	2257.44	2269.99	2284.27	2298.56	2312.85	2327.14	2341.43	2336.08	2330.74	2325.39	2320.05	2314.71	2315.47	2316.23	2316.99	2317.75	2318.51	2308.49	2298.46	2288.44	2278.41	2268.39	70094.5
REMIND-MAgPIE 3.2-4.6	Net Zero 2050	World	Emissions|CO2	Mt CO2/yr	43910.9	42935.3	41959.8	40984.3	40008.7	39033.2	36275.5	33517.9	30760.2	28002.6	25244.9	22879.5	20514.1	18148.7	15783.4	13418	12006	10594.1	9182.21	7770.29	6358.37	5480.77	4603.17	3725.57	2847.97	1970.37	1420.72	871.067	321.416	-228.235	-777.886	560529
REMIND-MAgPIE 3.2-4.6	Below 2°C	World	Emissions|CO2	Mt CO2/yr	43910.9	43229.5	42548	41866.6	41185.2	40503.8	39223.8	37943.7	36663.7	35383.6	34103.6	32430.5	30757.5	29084.5	27411.5	25738.4	24184.2	22630	21075.8	19521.6	17967.4	16939.4	15911.4	14883.4	13855.3	12827.3	12190.2	11553.1	10916	10278.9	9641.73	816360
GCAM 6.0 NGFS	Net Zero 2050	World	Emissions|CO2	Mt CO2/yr	36039	35736.1	35433.1	35130.2	34827.2	34524.3	32636.4	30748.4	28860.5	26972.6	25084.7	23542.3	21999.9	20457.5	18915	17372.6	16012.7	14652.8	13292.8	11932.9	10573	9151.89	7730.8	6309.71	4888.62	3467.53	2051.19	634.856	-781.48	-2197.82	-3614.15	558979
GCAM 6.0 NGFS	Below 2°C	World	Emissions|CO2	Mt CO2/yr	36039	35900.7	35762.3	35624	35485.6	35347.3	34187.7	33028	31868.4	30708.8	29549.1	28499.6	27450.1	26400.6	25351.1	24301.6	23251	22200.4	21149.8	20099.2	19048.6	18020.4	16992.2	15964	14935.8	13907.6	12892	11876.5	10861	9845.44	8829.9	745378
MESSAGEix-GLOBIOM 1.1-M-R12	Net Zero 2050	World	Emissions|CO2	Mt CO2/yr	41469.3	41466.1	41462.8	41459.5	41456.3	41453	38336.5	35219.9	32103.3	28986.8	25870.2	24261.4	22652.6	21043.8	19435.1	17826.3	16784.3	15742.4	14700.5	13658.6	12616.6	11713	10809.3	9905.65	9001.99	8098.33	7384.55	6670.78	5957	5243.22	4529.45	667319
MESSAGEix-GLOBIOM 1.1-M-R12	Below 2°C	World	Emissions|CO2	Mt CO2/yr	41469.3	41466.1	41462.8	41459.5	41456.3	41453	39933.3	38413.7	36894	35374.3	33854.6	33095.9	32337.3	31578.6	30819.9	30061.2	29362.2	28663.3	27964.3	27265.3	26566.3	25655.4	24744.5	23833.6	22922.7	22011.7	21109.1	20206.4	19303.8	18401.1	17498.5	946638
REMIND-MAgPIE 3.2-4.6	Net Zero 2050	World	Emissions|CO2|Energy|Supply|Electricity	Mt CO2/yr	11864.8	11498	11131.1	10764.2	10397.3	10030.4	8867.08	7703.74	6540.39	5377.05	4213.71	3562.99	2912.27	2261.55	1610.83	960.106	782.289	604.472	426.655	248.839	71.0216	32.6626	-5.6964	-44.0554	-82.4144	-120.773	-123.785	-126.797	-129.809	-132.82	-135.832	110959
REMIND-MAgPIE 3.2-4.6	Below 2°C	World	Emissions|CO2|Energy|Supply|Electricity	Mt CO2/yr	11864.8	11604.3	11343.7	11083.2	10822.6	10562	9935.68	9309.32	8682.96	8056.6	7430.24	6695.06	5959.87	5224.69	4489.51	3754.33	3282.68	2811.03	2339.38	1867.73	1396.08	1227.52	1058.95	890.389	721.825	553.261	490.102	426.944	363.785	300.626	237.468	154787
GCAM 6.0 NGFS	Net Zero 2050	World	Emissions|CO2|Energy|Supply|Electricity	Mt CO2/yr	11483.1	11284.6	11086.1	10887.6	10689.1	10490.6	9406.26	8321.89	7237.52	6153.15	5068.78	4449.28	3829.79	3210.29	2590.79	1971.3	1617.65	1264	910.357	556.71	203.063	131.954	60.8447	-10.2644	-81.3736	-152.483	-332.825	-513.167	-693.51	-873.852	-1054.19	119193
GCAM 6.0 NGFS	Below 2°C	World	Emissions|CO2|Energy|Supply|Electricity	Mt CO2/yr	11483.1	11370.7	11258.3	11145.9	11033.5	10921.1	10320.7	9720.35	9119.97	8519.6	7919.23	7518.52	7117.82	6717.11	6316.41	5915.71	5509.48	5103.25	4697.02	4290.79	3884.56	3492.48	3100.39	2708.31	2316.23	1924.14	1618.25	1312.36	1006.46	700.57	394.677	188457
MESSAGEix-GLOBIOM 1.1-M-R12	Net Zero 2050	World	Emissions|CO2|Energy|Supply|Electricity	Mt CO2/yr	11049	10853.8	10658.7	10463.5	10268.3	10073.2	8437.73	6802.28	5166.84	3531.39	1895.95	1540.43	1184.91	829.396	473.879	118.361	95.4006	72.4399	49.4792	26.5185	3.55774	0.839441	-1.87886	-4.59716	-7.31546	-10.0338	-11.222	-12.4102	-13.5985	-14.7867	-15.9749	93504
MESSAGEix-GLOBIOM 1.1-M-R12	Below 2°C	World	Emissions|CO2|Energy|Supply|Electricity	Mt CO2/yr	11049	10853.8	10658.7	10463.5	10268.3	10073.2	9064.51	8055.86	7047.2	6038.54	5029.89	4767.22	4504.54	4241.87	3979.2	3716.53	3598.95	3481.36	3363.77	3246.18	3128.59	2962.21	2795.82	2629.43	2463.05	2296.66	2130.48	1964.3	1798.13	1631.95	1465.77	158768
REMIND-MAgPIE 3.2-4.6	Net Zero 2050	World	Carbon Sequestration|CCS|Industrial Processes	Mt CO2/yr	0	0	0	0	0	0	16.218	32.4359	48.6539	64.8718	81.0898	103.501	125.913	148.324	170.736	193.147	215.561	237.974	260.388	282.802	305.216	328.566	351.915	375.265	398.615	421.965	437.701	453.436	469.171	484.907	500.642	6509.01
REMIND-MAgPIE 3.2-4.6	Below 2°C	World	Carbon Sequestration|CCS|Industrial Processes	Mt CO2/yr	0	0	0	0	0	0	0	0	0	0	0	3.50882	7.01763	10.5265	14.0353	17.5441	36.2879	55.0318	73.7756	92.5195	111.263	133.049	154.834	176.62	198.405	220.191	245.509	270.827	296.146	321.464	346.782	2785.34
GCAM 6.0 NGFS	Net Zero 2050	World	Carbon Sequestration|CCS|Industrial Processes	Mt CO2/yr	0	5.61765	11.2353	16.8529	22.4706	28.0882	62.7287	97.3692	132.01	166.65	201.291	286.101	370.911	455.722	540.532	625.342	719.13	812.918	906.706	1000.49	1094.28	1146.05	1197.81	1249.57	1301.34	1353.1	1383.68	1414.27	1444.85	1475.44	1506.02	21028.6
GCAM 6.0 NGFS	Below 2°C	World	Carbon Sequestration|CCS|Industrial Processes	Mt CO2/yr	0	4.99286	9.98572	14.9786	19.9714	24.9643	50.9533	76.9424	102.931	128.921	154.91	216.94	278.97	341	403.03	465.06	531.13	597.199	663.269	729.338	795.408	839.282	883.156	927.03	970.904	1014.78	1040.98	1067.19	1093.4	1119.6	1145.81	15713
MESSAGEix-GLOBIOM 1.1-M-R12	Net Zero 2050	World	Carbon Sequestration|CCS|Industrial Processes	Mt CO2/yr	0	0	0	0	0	0	159.484	318.967	478.451	637.935	797.418	915.215	1033.01	1150.81	1268.61	1386.4	1401.13	1415.85	1430.58	1445.3	1460.03	1474.98	1489.93	1504.88	1519.83	1534.78	1570.69	1606.59	1642.49	1678.39	1714.29	31036
MESSAGEix-GLOBIOM 1.1-M-R12	Below 2°C	World	Carbon Sequestration|CCS|Industrial Processes	Mt CO2/yr	0	0	0	0	0	0	15.0102	30.0203	45.0305	60.0407	75.0508	93.2952	111.54	129.784	148.028	166.273	209	251.728	294.455	337.183	379.91	391.101	402.291	413.482	424.672	435.863	442.727	449.592	456.457	463.321	470.186	6696.04
REMIND-MAgPIE 3.2-4.6	Net Zero 2050	World	Final Energy|Electricity	EJ/yr	84.4265	87.4073	90.388	93.3687	96.3495	99.3302	102.839	106.347	109.856	113.364	116.873	122.434	127.996	133.558	139.119	144.681	150.529	156.376	162.224	168.072	173.919	178.544	183.169	187.794	192.419	197.043	199.987	202.931	205.875	208.819	211.763	4547.8
REMIND-MAgPIE 3.2-4.6	Below 2°C	World	Final Energy|Electricity	EJ/yr	84.4265	87.4745	90.5224	93.5703	96.6182	99.6662	103.922	108.178	112.434	116.69	120.946	125.483	130.019	134.555	139.092	143.628	147.642	151.656	155.67	159.684	163.698	167.763	171.829	175.894	179.96	184.025	187.529	191.032	194.535	198.038	201.541	4417.72
GCAM 6.0 NGFS	Net Zero 2050	World	Final Energy|Electricity	EJ/yr	79.7618	83.4175	87.0732	90.7289	94.3846	98.0403	101.262	104.484	107.705	110.927	114.148	118.836	123.523	128.21	132.897	137.584	144.28	150.975	157.67	164.365	171.06	179.458	187.855	196.252	204.649	213.046	220.199	227.352	234.504	241.657	248.81	4655.11
GCAM 6.0 NGFS	Below 2°C	World	Final Energy|Electricity	EJ/yr	79.7619	83.444	87.1262	90.8083	94.4904	98.1726	101.404	104.635	107.866	111.098	114.329	118.045	121.761	125.477	129.193	132.909	137.508	142.107	146.706	151.305	155.903	160.843	165.782	170.722	175.661	180.601	186.387	192.173	197.96	203.746	209.532	4277.46
MESSAGEix-GLOBIOM 1.1-M-R12	Net Zero 2050	World	Final Energy|Electricity	EJ/yr	80.2472	81.9803	83.7134	85.4464	87.1795	88.9126	90.9773	93.042	95.1068	97.1715	99.2362	103.565	107.894	112.222	116.551	120.88	125.669	130.459	135.249	140.039	144.829	149.827	154.825	159.824	164.822	169.82	174.567	179.314	184.061	188.808	193.555	3939.79
MESSAGEix-GLOBIOM 1.1-M-R12	Below 2°C	World	Final Energy|Electricity	EJ/yr	80.2472	81.9803	83.7134	85.4464	87.1795	88.9126	90.7416	92.5707	94.3997	96.2287	98.0578	100.4	102.743	105.085	107.427	109.77	112.532	115.295	118.057	120.82	123.582	128.013	132.444	136.875	141.306	145.737	150.39	155.044	159.697	164.35	169.003	3578.05
Market share approach		Absolute direct CO2 emissions share in 2020
		POSCO	ThyssenKrupp	Baoshan Iron & Steel	BlueScope	China Steel	Severstal	Nippon Steel	ArcelorMittal	SSAB	Tata Steel
REMIND-MAgPIE 3.2-4.6	Net Zero 2050	0.0312542	0.00720813	0.0347892	0.00373755	0.0137285	0.013141	0.0292511	0.0474339	0.00403282	0.033672
REMIND-MAgPIE 3.2-4.6	Below 2°C	0.0312542	0.00720813	0.0347892	0.00373755	0.0137285	0.013141	0.0292511	0.0474339	0.00403282	0.033672
GCAM 6.0 NGFS	Net Zero 2050	0.0250029	0.00576641	0.0278309	0.00298999	0.0109826	0.0105126	0.0234005	0.0379465	0.0032262	0.0269372
GCAM 6.0 NGFS	Below 2°C	0.0250029	0.00576641	0.0278309	0.00298999	0.0109826	0.0105126	0.0234005	0.0379465	0.0032262	0.0269372
MESSAGEix-GLOBIOM 1.1-M-R12	Net Zero 2050	0.0261625	0.00603384	0.0291216	0.00312865	0.011492	0.0110001	0.0244857	0.0397063	0.00337582	0.0281864
MESSAGEix-GLOBIOM 1.1-M-R12	Below 2°C	0.0261625	0.00603384	0.0291216	0.00312865	0.011492	0.0110001	0.0244857	0.0397063	0.00337582	0.0281864

## Sheet: ArcelorMittal_Output
	Emissions																																	BAU		Stated TP
		2020	2021	2022	2023	2024	2025	2026	2027	2028	2029	2030	2031	2032	2033	2034	2035	2036	2037	2038	2039	2040	2041	2042	2043	2044	2045	2046	2047	2048	2049	2050	Cumulative Emissions	Overshoot	% overshoot	Overshoot	% overshoot
	ArcelorMittal - Absolute CO2 emissions (BAU)	113.8	109.877	90.5327	89.5827	91.9182	101.899	103.325	103.325	123.273	145.216	145.216	145.216	145.216	145.216	145.216	145.216	145.216	145.216	145.216	145.216	145.216	145.216	145.216	145.216	145.216	145.216	145.216	145.216	145.216	145.216	145.216	4122.28
	ArcelorMittal - Absolute CO2 emissions (TP)	113.75	109.828	90.4757	89.5306	91.8303	101.85	103.35	99.7599	117.844	139.909	125.777	123.508	123.508	123.508	123.508	123.508	123.508	123.508	123.508	123.508	123.508	123.508	123.508	123.508	123.508	123.508	123.508	123.508	123.508	123.508	123.398	3653.96
	ArcelorMittal - Absolute CO2 emissions (REMIND Net Zero 2050 benchmark)	113.8	107.816	101.831	95.8468	89.8622	83.8777	73.7935	63.7093	53.6251	43.5409	33.4567	28.952	24.4473	19.9427	15.438	10.9333	9.42088	7.90843	6.39598	4.88353	3.37107	2.94862	2.52617	2.10371	1.68126	1.2588	1.14367	1.02853	0.913389	0.798251	0.683113	1007.94	3114.34	3.08981	2646.02	2.62518
	ArcelorMittal - Absolute CO2 emissions (REMIND Below 2°C benchmark)	113.8	111.05	108.299	105.548	102.798	100.047	93.8758	87.7045	81.5332	75.3619	69.1906	65.8043	62.4179	59.0316	55.6453	52.259	46.911	41.5631	36.2151	30.8672	25.5192	23.3254	21.1317	18.9379	16.7441	14.5504	13.6523	12.7542	11.8561	10.958	10.0599	1679.41	2442.86	1.45459	1974.55	1.17574
	ArcelorMittal - Absolute CO2 emissions (GCAM 6.0 NGFS Net Zero 2050 benchmark)	113.8	111.179	108.558	105.937	103.316	100.695	92.6621	84.6293	76.5965	68.5636	60.5308	54.1117	47.6925	41.2733	34.8542	28.435	25.5054	22.5758	19.6462	16.7167	13.7871	12.4605	11.134	9.80745	8.48091	7.15437	6.84409	6.53382	6.22355	5.91327	5.603	1411.22	2711.05	1.92107	2242.74	1.58922
	ArcelorMittal - Absolute CO2 emissions (GCAM 6.0 NGFS Below 2°C benchmark)	113.8	111.558	109.316	107.074	104.832	102.589	95.9077	89.2261	82.5445	75.8629	69.1813	63.3699	57.5584	51.747	45.9356	40.1241	37.1791	34.234	31.289	28.344	25.399	23.4448	21.4907	19.5366	17.5824	15.6283	14.4701	13.312	12.1538	10.9956	9.83746	1635.52	2486.75	1.52046	2018.44	1.23412
	ArcelorMittal - Absolute CO2 emissions (MESSAGEix Net Zero 2050 benchmark)	113.8	114.882	115.963	117.045	118.126	119.208	117.594	115.98	114.366	112.751	111.137	109.175	107.212	105.25	103.287	101.325	99.1176	96.9107	94.7037	92.4967	90.2897	88.7064	87.1232	85.5399	83.9566	82.3733	80.6025	78.8318	77.0611	75.2903	73.5196	3083.62	1038.65	0.336828	570.337	0.184957
	ArcelorMittal - Absolute CO2 emissions (MESSAGEix Below 2°C benchmark)	113.8	114.882	115.963	117.045	118.126	119.208	118.039	116.87	115.702	114.533	113.364	112.382	111.401	110.419	109.437	108.455	106.537	104.619	102.701	100.782	98.8641	97.4653	96.0664	94.6675	93.2687	91.8698	90.3493	88.8288	87.3082	85.7877	84.2672	3253.01	869.267	0.267219	400.951	0.123255

## Sheet: ArcelorMittal_BAU
Company name (CA100+)	GEM Plant ID	GEM Unit ID	Unit name	Plant name (English)	Country	Parent [formula]	Ownership share	Total nominal crude steel capacity (ttpa)	Owned nominal crude steel capacity (ttpa)	Nominal BF capacity (ttpa)	Nominal BOF capacity (ttpa)	Nominal DRI capacity (ttpa)	Nominal EAF steel capacity (ttpa)	Main production process	Main production equipment	Status	Plant/Unit - Start date	Last relining (year)	Announced phase-out (year)	Relining required (year)	2020	2021	2022	2023	2024	2025	2026	2027	2028	2029	2030	2031	2032	2033	2034	2035	2036	2037	2038	2039	2040	2041	2042	2043	2044	2045	2046	2047	2048
ArcelorMittal S.A.	SAR00001			ArcelorMittal Acindar Villa Constitución steel plant	Argentina	ArcelorMittal SA [100%]	1	1750	1750	N/A	N/A	600	1750	integrated (DRI)	DRI, EAF	operating	1946				1750	1750	1750	1750	1750	1750	1750	1750	1750	1750	1750	1750	1750	1750	1750	1750	1750	1750	1750	1750	1750	1750	1750	1750	1750	1750	1750	1750	1750
ArcelorMittal S.A.	SBE00001			ArcelorMittal Gent steel plant	Belgium	ArcelorMittal SA [100%]	1	5000	5000	5000	5000	N/A	N/A	integrated (BF)	BF, BOF	operating	1966				5000	5000	5000	5000	5000	5000	5000	5000	5000	5000	5000	5000	5000	5000	5000	5000	5000	5000	5000	5000	5000	5000	5000	5000	5000	5000	5000	5000	5000
ArcelorMittal S.A.	SBE00001-1			Dummy - ArcelorMittal Gent steel plant (DRI-EAF addition)	Belgium	ArcelorMittal SA [100%]	1	2500	2500	N/A		2500	2500	integrated (DRI)	DRI, EAF	announced	2030				0	0	0	0	0	0	0	0	0	0	0	0	0	0	0	0	0	0	0	0	0	0	0	0	0	0	0	0	0
ArcelorMittal S.A.	SBE00001	U000013	B	ArcelorMittal Gent steel plant	Belgium	ArcelorMittal SA [100%]	1	2300	2300	2300					BF	operating	1967	2021	N/A	2041	2300	2300	2300	2300	2300	2300	2300	2300	2300	2300	2300	2300	2300	2300	2300	2300	2300	2300	2300	2300	2300	2300	2300	2300	2300	2300	2300	2300	2300
ArcelorMittal S.A.	SBE00001	U000014	A	ArcelorMittal Gent steel plant	Belgium	ArcelorMittal SA [100%]	1	2700	2700	2700					BF	operating	1966	2003	2030	2023	2700	2700	2700	2700	2700	2700	2700	2700	2700	2700	2700	2700	2700	2700	2700	2700	2700	2700	2700	2700	2700	2700	2700	2700	2700	2700	2700	2700	2700
ArcelorMittal S.A.	SBA00001			ArcelorMittal Zenica steel plant	Bosnia and Herzegovina	ArcelorMittal SA [100%]	1	1940	1940	1100	1140	N/A	800	integrated (BF)	BF, BOF, EAF	operating	1892				1140	1140	1140	1140	1140	1140	1140	1140	1140	1140	1140	1140	1140	1140	1140	1140	1140	1140	1140	1140	1140	1140	1140	1140	1140	1140	1140	1140	1140
ArcelorMittal S.A.	SBA00001			ArcelorMittal Zenica steel plant (scrap-EAF)	Bosnia and Herzegovina	ArcelorMittal SA [100%]	1						800	electric	EAF	operating					800	800	800	800	800	800	800	800	800	800	800	800	800	800	800	800	800	800	800	800	800	800	800	800	800	800	800	800	800
ArcelorMittal S.A.	SBA00001	U000011	4	ArcelorMittal Zenica steel plant	Bosnia and Herzegovina	ArcelorMittal SA [100%]	1	1100	1100	1100					BF	operating	2004	2018	N/A	2038	1100	1100	1100	1100	1100	1100	1100	1100	1100	1100	1100	1100	1100	1100	1100	1100	1100	1100	1100	1100	1100	1100	1100	1100	1100	1100	1100	1100	1100
ArcelorMittal S.A.	SBR00018			ArcelorMittal Barra Mansa steel plant	Brazil	ArcelorMittal SA [100%]	1	800	800	N/A	N/A	N/A	800	electric	EAF	operating	1937				800	800	800	800	800	800	800	800	800	800	800	800	800	800	800	800	800	800	800	800	800	800	800	800	800	800	800	800	800
ArcelorMittal S.A.	SBR00013			ArcelorMittal Juiz de Fora steel plant	Brazil	ArcelorMittal SA [100%]	1	1100	1100	360	N/A	N/A	1100	integrated (BF-EAF)	BF, EAF	operating	1984				360	360	360	360	360	360	360	360	360	360	360	360	360	360	360	360	360	360	360	360	360	360	360	360	360	360	360	360	360
ArcelorMittal S.A.	SBR00013			ArcelorMittal Juiz de Fora steel plant (scrap-EAF)	Brazil	ArcelorMittal SA [100%]	1						1100	electric	EAF	operating					740	740	740	740	740	740	740	740	740	740	740	740	740	740	740	740	740	740	740	740	740	740	740	740	740	740	740	740	740
ArcelorMittal S.A.	SBR00013	U000034	1	ArcelorMittal Juiz de Fora steel plant	Brazil	ArcelorMittal SA [100%]	1	180	180	180					BF	operating	January 2007	2020	N/A	2040	180	180	180	180	180	180	180	180	180	180	180	180	180	180	180	180	180	180	180	180	180	180	180	180	180	180	180	180	180
ArcelorMittal S.A.	SBR00013	U000035	2	ArcelorMittal Juiz de Fora steel plant	Brazil	ArcelorMittal SA [100%]	1	180	180	180					BF	operating	February 2007	2021	N/A	2041	180	180	180	180	180	180	180	180	180	180	180	180	180	180	180	180	180	180	180	180	180	180	180	180	180	180	180	180	180
ArcelorMittal S.A.	SBR00003			ArcelorMittal Monlevade steel plant	Brazil	ArcelorMittal SA [100%]	1	1200	1200	1040	1200	N/A	N/A	integrated (BF)	BF, BOF	operating	1937				1200	1200	1200	1200	1200	1200	1200	1200	1200	1200	1200	1200	1200	1200	1200	1200	1200	1200	1200	1200	1200	1200	1200	1200	1200	1200	1200	1200	1200
				Dummy - ArcelorMittal Monlevade steel plant (BF-EAF)	Brazil	ArcelorMittal SA [100%]	1			1200			1000	integrated (BF-EAF)	BF, EAF	construction					0	0	0	0	0	0	1000	1000	1000	1000	1000	1000	1000	1000	1000	1000	1000	1000	1000	1000	1000	1000	1000	1000	1000	1000	1000	1000	1000
ArcelorMittal S.A.	SBR00003-1			ArcelorMittal Monlevade steel BF and EAF expansion	Brazil	ArcelorMittal SA [100%]	1	1000	1000	1200		N/A	1000	integrated (BF-EAF)	BF, EAF	construction	2024				0	0	0	0	0	0	1000	1000	1000	1000	1000	1000	1000	1000	1000	1000	1000	1000	1000	1000	1000	1000	1000	1000	1000	1000	1000	1000	1000
ArcelorMittal S.A.	SBR00003-1	U000021	B	ArcelorMittal Monlevade steel BF expansion	Brazil	ArcelorMittal SA [100%]	1	1200	1200	1200					BF	announced	2024	NA	N/A	2044	0	0	0	0	0	0	1200	1200	1200	1200	1200	1200	1200	1200	1200	1200	1200	1200	1200	1200	1200	1200	1200	1200	1200	1200	1200	1200	1200
ArcelorMittal S.A.	SBR00003	U000020	A	ArcelorMittal Monlevade steel plant	Brazil	ArcelorMittal SA [100%]	1	1040	1040	1040					BF	operating	December 1999	2027	N/A	2047	1040	1040	1040	1040	1040	1040	1040	1040	1040	1040	1040	1040	1040	1040	1040	1040	1040	1040	1040	1040	1040	1040	1040	1040	1040	1040	1040	1040	1040
ArcelorMittal S.A.	SBR00008			ArcelorMittal Pecém steel plant	Brazil	ArcelorMittal SA [100%]	1	3000	3000	3192	3000	N/A	N/A	integrated (BF)	BF, BOF	operating	2016				0	0	0	3000	3000	3000	3000	3000	3000	3000	3000	3000	3000	3000	3000	3000	3000	3000	3000	3000	3000	3000	3000	3000	3000	3000	3000	3000	3000
ArcelorMittal S.A.	SBR00008	U000028	1	ArcelorMittal Pecém steel plant	Brazil	ArcelorMittal SA [100%]	1	3191.93	3191.93	3191.93					BF	operating	June 2016	2016	N/A	2036	0	0	0	3191.93	3191.93	3191.93	3191.93	3191.93	3191.93	3191.93	3191.93	3191.93	3191.93	3191.93	3191.93	3191.93	3191.93	3191.93	3191.93	3191.93	3191.93	3191.93	3191.93	3191.93	3191.93	3191.93	3191.93	3191.93	3191.93
ArcelorMittal S.A.	SBR00009			ArcelorMittal Piracicaba steel plant	Brazil	ArcelorMittal SA [100%]	1	1100	1100	N/A	N/A	N/A	1100	electric	EAF	operating	1955				1100	1100	1100	1100	1100	1100	1100	1100	1100	1100	1100	1100	1100	1100	1100	1100	1100	1100	1100	1100	1100	1100	1100	1100	1100	1100	1100	1100	1100
ArcelorMittal S.A.	SBR00004			ArcelorMittal Resende steel plant	Brazil	ArcelorMittal SA [100%]	1	1000	1000	N/A	N/A	N/A	1000	electric	EAF	operating	2009				1000	1000	1000	1000	1000	1000	1000	1000	1000	1000	1000	1000	1000	1000	1000	1000	1000	1000	1000	1000	1000	1000	1000	1000	1000	1000	1000	1000	1000
ArcelorMittal S.A.	SBR00002			ArcelorMittal Tubarão steel plant	Brazil	ArcelorMittal SA [100%]	1	7500	7500	7280	7500	N/A	N/A	integrated (BF)	BF, BOF	operating	1983				7500	7500	7500	7500	7500	7500	7500	7500	7500	7500	7500	7500	7500	7500	7500	7500	7500	7500	7500	7500	7500	7500	7500	7500	7500	7500	7500	7500	7500
ArcelorMittal S.A.	SBR00002	U000017	1	ArcelorMittal Tubarão steel plant	Brazil	ArcelorMittal SA [100%]	1	3280	3280	3280					BF	operating	November 1983	2012	N/A	2032	3280	3280	3280	3280	3280	3280	3280	3280	3280	3280	3280	3280	3280	3280	3280	3280	3280	3280	3280	3280	3280	3280	3280	3280	3280	3280	3280	3280	3280
ArcelorMittal S.A.	SBR00002	U000018	2	ArcelorMittal Tubarão steel plant	Brazil	ArcelorMittal SA [100%]	1	1200	1200	1200					BF	operating	July 1998	2019	N/A	2039	1200	1200	1200	1200	1200	1200	1200	1200	1200	1200	1200	1200	1200	1200	1200	1200	1200	1200	1200	1200	1200	1200	1200	1200	1200	1200	1200	1200	1200
ArcelorMittal S.A.	SBR00002	U000019	3	ArcelorMittal Tubarão steel plant	Brazil	ArcelorMittal SA [100%]	1	2800	2800	2800					BF	operating	July 2007	2007	N/A	2027	2800	2800	2800	2800	2800	2800	2800	2800	2800	2800	2800	2800	2800	2800	2800	2800	2800	2800	2800	2800	2800	2800	2800	2800	2800	2800	2800	2800	2800
ArcelorMittal S.A.	SCA00002			ArcelorMittal Dofasco steel plant	Canada	ArcelorMittal SA [100%]	1	4050	4050	3024	2700	N/A	1350	integrated (BF)	BF, BOF, EAF	operating	1912				4050	4050	4050	4050	4050	4050	4050	4050	4050	4050	4050	4050	4050	4050	4050	4050	4050	4050	4050	4050	4050	4050	4050	4050	4050	4050	4050	4050	4050
ArcelorMittal S.A.	SCA00002-1			Dummy - ArcelorMittal Dofasco steel plant transition (DRI-EAF addition)	Canada	ArcelorMittal SA [100%]	1	2400	2400	N/A		2649	2400	integrated (DRI)	DRI, EAF	announced	2028				0	0	0	0	0	0	0	0	0	0	0	0	0	0	0	0	0	0	0	0	0	0	0	0	0	0	0	0	0
ArcelorMittal S.A.	SCA00002	U000048	2	ArcelorMittal Dofasco steel plant	Canada	ArcelorMittal SA [100%]	1	785	785	785					BF	operating	1957	2005	2028	2025	785	785	785	785	785	785	785	785	785	785	785	785	785	785	785	785	785	785	785	785	785	785	785	785	785	785	785	785	785
ArcelorMittal S.A.	SCA00002	U000049	3	ArcelorMittal Dofasco steel plant	Canada	ArcelorMittal SA [100%]	1	716	716	716					BF	mothballed	2010	2010	April 2020	2030	716	716	716	716	716	716	716	716	716	716	716	716	716	716	716	716	716	716	716	716	716	716	716	716	716	716	716	716	716
ArcelorMittal S.A.	SCA00002	U000050	4	ArcelorMittal Dofasco steel plant	Canada	ArcelorMittal SA [100%]	1	1523	1523	1523					BF	operating	1971	1998	2028	2018	1523	1523	1523	1523	1523	1523	1523	1523	1523	1523	1523	1523	1523	1523	1523	1523	1523	1523	1523	1523	1523	1523	1523	1523	1523	1523	1523	1523	1523
ArcelorMittal S.A.	SCA00001			ArcelorMittal Montreal steel plant (ArcelorMittal Canada 1 & 2)	Canada	ArcelorMittal SA [100%]	1	2400	2400	N/A	N/A	1000	2400	integrated (DRI)	DRI, EAF	operating	1914				2400	2400	2400	2400	2400	2400	2400	2400	2400	2400	2400	2400	2400	2400	2400	2400	2400	2400	2400	2400	2400	2400	2400	2400	2400	2400	2400	2400	2400
ArcelorMittal S.A.	SFR00001			ArcelorMittal Dunkerque steel plant	France	ArcelorMittal SA [100%]	1	6750	6750	6900	6750	N/A	N/A	integrated (BF)	BF, BOF	operating	unknown				6750	6750	6750	6750	6750	6750	6750	6750	6750	6750	6750	6750	6750	6750	6750	6750	6750	6750	6750	6750	6750	6750	6750	6750	6750	6750	6750	6750	6750
ArcelorMittal S.A.	SFR00001-1			Dummy - ArcelorMittal Dunkerque steel plant transition (DRI and EAF addition)	France	ArcelorMittal SA [100%]	1	4500	4500	N/A		2500	4500	integrated (DRI)	DRI, EAF	announced	2027				0	0	0	0	0	0	0	0	0	0	0	0	0	0	0	0	0	0	0	0	0	0	0	0	0	0	0	0	0
ArcelorMittal S.A.	SFR00001	U000989	4	ArcelorMittal Dunkerque steel plant	France	ArcelorMittal SA [100%]	1	3700	3700	3700					BF	operating	1971	2016	N/A	2036	3700	3700	3700	3700	3700	3700	3700	3700	3700	3700	3700	3700	3700	3700	3700	3700	3700	3700	3700	3700	3700	3700	3700	3700	3700	3700	3700	3700	3700
ArcelorMittal S.A.	SFR00001	U000990	2	ArcelorMittal Dunkerque steel plant	France	ArcelorMittal SA [100%]	1	1500	1500	1500					BF	mothballed	1963	NA	N/A	2023	1500	1500	1500	1500	1500	1500	1500	1500	1500	1500	1500	1500	1500	1500	1500	1500	1500	1500	1500	1500	1500	1500	1500	1500	1500	1500	1500	1500	1500
ArcelorMittal S.A.	SFR00001	U000991	3	ArcelorMittal Dunkerque steel plant	France	ArcelorMittal SA [100%]	1	1800	1800	1800					BF	operating	1968	2022	N/A	2042	1800	1800	1800	1800	1800	1800	1800	1800	1800	1800	1800	1800	1800	1800	1800	1800	1800	1800	1800	1800	1800	1800	1800	1800	1800	1800	1800	1800	1800
ArcelorMittal S.A.	SFR00002			ArcelorMittal Méditerranée Fos sur Mer steel plant	France	ArcelorMittal SA [100%]	1	4000	4000	4000	4000	N/A	N/A	integrated (BF)	BF, BOF	operating	1980				4000	4000	4000	4000	4000	4000	4000	4000	4000	4000	4000	4000	4000	4000	4000	4000	4000	4000	4000	4000	4000	4000	4000	4000	4000	4000	4000	4000	4000
ArcelorMittal S.A.	SFR00002-1			Dummy - ArcelorMittal Méditerranée Fos sur Mer steel plant transition (EAF addition)	France	ArcelorMittal SA [100%]	1	2000	2000	N/A		N/A	2000	electric	EAF	announced	2027				0	0	0	0	0	0	0	0	0	0	0	0	0	0	0	0	0	0	0	0	0	0	0	0	0	0	0	0	0
ArcelorMittal S.A.	SFR00002	U000992	1	ArcelorMittal Méditerranée Fos sur Mer steel plant	France	ArcelorMittal SA [100%]	1	2000	2000	2000					BF	operating	1974	2016	N/A	2036	2000	2000	2000	2000	2000	2000	2000	2000	2000	2000	2000	2000	2000	2000	2000	2000	2000	2000	2000	2000	2000	2000	2000	2000	2000	2000	2000	2000	2000
ArcelorMittal S.A.	SFR00002	U000993	2	ArcelorMittal Méditerranée Fos sur Mer steel plant	France	ArcelorMittal SA [100%]	1	2000	2000	2000					BF	operating	1977	2011	N/A	2031	2000	2000	2000	2000	2000	2000	2000	2000	2000	2000	2000	2000	2000	2000	2000	2000	2000	2000	2000	2000	2000	2000	2000	2000	2000	2000	2000	2000	2000
ArcelorMittal S.A.	SDE00003			AG der Dillinger Hüttenwerke Dillingen steel plant	Germany	SHS Stahl Holding Saar GmbH & Co KgaA [57.2%]; ArcelorMittal SA [33.4%]; Saarstahl AG [9.4%]	0.334	2760	921.84	4790	2760	N/A	N/A	integrated (BF)	BF, BOF	operating	1969				921.84	921.84	921.84	921.84	921.84	921.84	921.84	921.84	921.84	921.84	921.84	921.84	921.84	921.84	921.84	921.84	921.84	921.84	921.84	921.84	921.84	921.84	921.84	921.84	921.84	921.84	921.84	921.84	921.84
ArcelorMittal S.A.	SDE00003-1			Dummy - AG der Dillinger Hüttenwerke Dillingen steel plant transition (DRI-EAF addition)	Germany	SHS Stahl Holding Saar GmbH & Co KgaA [57.2%]; ArcelorMittal SA [33.4%]; Saarstahl AG [9.4%]	0.334	1750	584.5	N/A		2500	1750	integrated (DRI)	DRI, EAF	announced	2027				0	0	0	0	0	0	0	0	0	0	0	0	0	0	0	0	0	0	0	0	0	0	0	0	0	0	0	0	0
ArcelorMittal S.A.	SDE00003	U000973	3	AG der Dillinger Hüttenwerke Dillingen steel plant	Germany	SHS Stahl Holding Saar GmbH & Co KgaA [57.2%]; ArcelorMittal SA [33.4%]; Saarstahl AG [9.4%]	0.334	730	243.82	730					BF	mothballed	1965	2003	N/A	2023	243.82	243.82	243.82	243.82	243.82	243.82	243.82	243.82	243.82	243.82	243.82	243.82	243.82	243.82	243.82	243.82	243.82	243.82	243.82	243.82	243.82	243.82	243.82	243.82	243.82	243.82	243.82	243.82	243.82
ArcelorMittal S.A.	SDE00003	U000974	4	AG der Dillinger Hüttenwerke Dillingen steel plant	Germany	SHS Stahl Holding Saar GmbH & Co KgaA [57.2%]; ArcelorMittal SA [33.4%]; Saarstahl AG [9.4%]	0.334	2227	743.818	2227					BF	operating	1974	2019	N/A	2039	743.818	743.818	743.818	743.818	743.818	743.818	743.818	743.818	743.818	743.818	743.818	743.818	743.818	743.818	743.818	743.818	743.818	743.818	743.818	743.818	743.818	743.818	743.818	743.818	743.818	743.818	743.818	743.818	743.818
ArcelorMittal S.A.	SDE00003	U000975	5	AG der Dillinger Hüttenwerke Dillingen steel plant	Germany	SHS Stahl Holding Saar GmbH & Co KgaA [57.2%]; ArcelorMittal SA [33.4%]; Saarstahl AG [9.4%]	0.334	2555	853.37	2555					BF	operating	1985	2010	N/A	2030	853.37	853.37	853.37	853.37	853.37	853.37	853.37	853.37	853.37	853.37	853.37	853.37	853.37	853.37	853.37	853.37	853.37	853.37	853.37	853.37	853.37	853.37	853.37	853.37	853.37	853.37	853.37	853.37	853.37
ArcelorMittal S.A.	SDE00003-2			AG der Dillinger Hüttenwerke Dillingen steel plant transition (EAF addition)	Germany	SHS Stahl Holding Saar GmbH & Co KgaA [57.2%]; ArcelorMittal SA [33.4%]; Saarstahl AG [9.4%]	0.334	1400	467.6	N/A		N/A	1400	electric	EAF	announced	2045				0	0	0	0	0	0	0	0	0	0	0	0	0	0	0	0	0	0	0	0	0	0	0	0	0	0	0	0	0
ArcelorMittal S.A.	SDE00006			ArcelorMittal Bremen steel plant	Germany	ArcelorMittal SA [100%]	1	3800	3800	3800	3800	N/A	N/A	integrated (BF)	BF, BOF	operating	1957				3800	3800	3800	3800	3800	3800	3800	3800	3800	3800	3800	3800	3800	3800	3800	3800	3800	3800	3800	3800	3800	3800	3800	3800	3800	3800	3800	3800	3800
ArcelorMittal S.A.	SDE00006-1			Dummy - ArcelorMittal Bremen steel plant transition (DRI-EAF addition)	Germany	ArcelorMittal SA [100%]	1	1750	1750	N/A		2000	1750	integrated (DRI)	DRI, EAF	announced	2030				0	0	0	0	0	0	0	0	0	0	0	0	0	0	0	0	0	0	0	0	0	0	0	0	0	0	0	0	0
ArcelorMittal S.A.	SDE00006	U000978	2	ArcelorMittal Bremen steel plant	Germany	ArcelorMittal SA [100%]	1	2600	2600	2600					BF	operating	1954	2016	N/A	2036	2600	2600	2600	2600	2600	2600	2600	2600	2600	2600	2600	2600	2600	2600	2600	2600	2600	2600	2600	2600	2600	2600	2600	2600	2600	2600	2600	2600	2600
ArcelorMittal S.A.	SDE00006	U000979	3	ArcelorMittal Bremen steel plant	Germany	ArcelorMittal SA [100%]	1	1250	1250	1250					BF	operating	1966	2009	N/A	2029	1250	1250	1250	1250	1250	1250	1250	1250	1250	1250	1250	1250	1250	1250	1250	1250	1250	1250	1250	1250	1250	1250	1250	1250	1250	1250	1250	1250	1250
ArcelorMittal S.A.	SDE00008			ArcelorMittal Duisburg steel plant	Germany	ArcelorMittal SA [100%]	1	1300	1300	N/A	1300	N/A	N/A	oxygen	BOF	operating	1852				1300	1300	1300	1300	1300	1300	1300	1300	1300	1300	1300	1300	1300	1300	1300	1300	1300	1300	1300	1300	1300	1300	1300	1300	1300	1300	1300	1300	1300
ArcelorMittal S.A.	SDE00008-1			Dummy - ArcelorMittal Duisburg steel plant transition (EAF addition)	Germany	ArcelorMittal SA [100%]	1	1000	1000	N/A		N/A	1000	electric	EAF	announced	2030				0	0	0	0	0	0	0	0	0	0	0	0	0	0	0	0	0	0	0	0	0	0	0	0	0	0	0	0	0
ArcelorMittal S.A.	SDE00005			ArcelorMittal Eisenhüttenstadt steel plant	Germany	ArcelorMittal SA [100%]	1	2400	2400	1825	2400	N/A	N/A	integrated (BF)	BF, BOF	operating	1950				2400	2400	2400	2400	2400	2400	2400	2400	2400	2400	2400	2400	2400	2400	2400	2400	2400	2400	2400	2400	2400	2400	2400	2400	2400	2400	2400	2400	2400
ArcelorMittal S.A.	SDE00005-1			Dummy - ArcelorMittal Eisenhüttenstadt steel plant transition (DRI-EAF addition)	Germany	ArcelorMittal SA [100%]	1	1750	1750	N/A		>0	1750	integrated (DRI)	DRI, EAF	announced	2030				0	0	0	0	0	0	0	0	0	0	0	0	0	0	0	0	0	0	0	0	0	0	0	0	0	0	0	0	0
ArcelorMittal S.A.	SDE00005	U000977	5A	ArcelorMittal Eisenhüttenstadt steel plant	Germany	ArcelorMittal SA [100%]	1	1825	1825	1825					BF	operating	1997	2021	N/A	2041	1825	1825	1825	1825	1825	1825	1825	1825	1825	1825	1825	1825	1825	1825	1825	1825	1825	1825	1825	1825	1825	1825	1825	1825	1825	1825	1825	1825	1825
ArcelorMittal S.A.	SDE00007			ArcelorMittal Hamburg steel plant	Germany	ArcelorMittal SA [100%]	1	1100	1100	N/A	N/A	600	1100	integrated (DRI)	DRI, EAF	operating	1969				600	600	600	600	600	600	600	600	600	600	600	600	600	600	600	600	600	600	600	600	600	600	600	600	600	600	600	600	600
ArcelorMittal S.A.	SDE00007			ArcelorMittal Hamburg steel plant (scrap-EAF)	Germany	ArcelorMittal SA [100%]	1						1100	electric	EAF	operating					500	500	500	500	500	500	500	500	500	500	500	500	500	500	500	500	500	500	500	500	500	500	500	500	500	500	500	500	500
ArcelorMittal S.A.	SDE00007-1			ArcelorMittal Hamburg steel plant (DRI addition phase I)	Germany	ArcelorMittal SA [100%]	1	100	100	N/A		100	N/A	ironmaking (DRI)	DRI	announced	2026				0	0	0	0	0	0	0	0	0	0	0	0	0	0	0	0	0	0	0	0	0	0	0	0	0	0	0	0	0
ArcelorMittal S.A.	SDE00007-2			ArcelorMittal Hamburg steel plant (DRI addition phase II)	Germany	ArcelorMittal SA [100%]	1	600	600	N/A		600	N/A	ironmaking (DRI)	DRI	announced	2030				0	0	0	0	0	0	0	0	0	0	0	0	0	0	0	0	0	0	0	0	0	0	0	0	0	0	0	0	0
ArcelorMittal S.A.	SIN00066			ArcelorMittal Nippon Steel Kendrapara plant	India	ArcelorMittal SA [60%]; Nippon Steel Corp [40%]	0.6	14000	8400	unknown	12000	unknown	N/A	oxygen	BOF	announced	2028				0	0	0	0	0	0	0	0	8400	8400	8400	8400	8400	8400	8400	8400	8400	8400	8400	8400	8400	8400	8400	8400	8400	8400	8400	8400	8400
ArcelorMittal S.A.	SIN00004			ArcelorMittal Nippon Steel India Hazira Plant	India	ArcelorMittal SA [60%]; Nippon Steel Corp [40%]	0.6	9600	5760	2040		7830	9600	integrated (BF-EAF)	BF, DRI, EAF	operating	1997				1224	1224	1224	1224	1224	1224	1224	1224	1224	1224	1224	1224	1224	1224	1224	1224	1224	1224	1224	1224	1224	1224	1224	1224	1224	1224	1224	1224	1224
ArcelorMittal S.A.	SIN00004			ArcelorMittal Nippon Steel India Hazira Plant	India	ArcelorMittal SA [60%]; Nippon Steel Corp [40%]	0.6					7830		integrated (DRI)	DRI, EAF	operating					4698	4698	4698	4698	4698	4698	4698	4698	4698	4698	4698	4698	4698	4698	4698	4698	4698	4698	4698	4698	4698	4698	4698	4698	4698	4698	4698	4698	4698
ArcelorMittal S.A.	SIN00004			ArcelorMittal Nippon Steel India Hazira Plant	India	ArcelorMittal SA [60%]; Nippon Steel Corp [40%]	0.6				7000			integrated (BF)	BF, BOF	construction					0	0	0	0	0	4200	4200	4200	4200	9240	9240	9240	9240	9240	9240	9240	9240	9240	9240	9240	9240	9240	9240	9240	9240	9240	9240	9240	9240
ArcelorMittal S.A.	SIN00004	U001021	1	ArcelorMittal Nippon Steel India Hazira Plant	India	ArcelorMittal SA [60%]; Nippon Steel Corp [40%]	0.6	2040	1224	2040					BF	operating	2010	2025	N/A	2025	1224	1224	1224	1224	1224	1224	1224	1224	1224	1224	1224	1224	1224	1224	1224	1224	1224	1224	1224	1224	1224	1224	1224	1224	1224	1224	1224	1224	1224
ArcelorMittal S.A.	SIN00004-1			ArcelorMittal Nippon Steel India Hazira Plant BF and BOF expansion (I)	India	ArcelorMittal SA [60%]; Nippon Steel Corp [40%]	0.6	7000	4200	7000	7000	N/A	N/A	integrated (BF)	BF, BOF	construction	2025			2045	0	0	0	0	0	4200	4200	4200	4200	4200	4200	4200	4200	4200	4200	4200	4200	4200	4200	4200	4200	4200	4200	4200	4200	4200	4200	4200	4200
ArcelorMittal S.A.	SIN00004-1	U001316	2	ArcelorMittal Nippon Steel India Hazira Plant BF and BOF expansion	India	ArcelorMittal SA [60%]; Nippon Steel Corp [40%]	0.6	3500	2100	3500					BF	construction	2025	NA	N/A	2045	0	0	0	0	0	2100	2100	2100	2100	2100	2100	2100	2100	2100	2100	2100	2100	2100	2100	2100	2100	2100	2100	2100	2100	2100	2100	2100	2100
ArcelorMittal S.A.	SIN00004-1	U001317	3	ArcelorMittal Nippon Steel India Hazira Plant BF and BOF expansion	India	ArcelorMittal SA [60%]; Nippon Steel Corp [40%]	0.6	3500	2100	3500					BF	construction	2026	NA	N/A	2046	0	0	0	0	0	2100	2100	2100	2100	2100	2100	2100	2100	2100	2100	2100	2100	2100	2100	2100	2100	2100	2100	2100	2100	2100	2100	2100	2100
ArcelorMittal S.A.				ArcelorMittal Nippon Steel India Hazira Plant BF and BOF expansion (II)	India	ArcelorMittal SA [60%]; Nippon Steel Corp [40%]	0.6	8400	5040	8400				integrated (BF)	BF, BOF	announced	2029			2049	0	0	0	0	0	0	0	0	0	5040	5040	5040	5040	5040	5040	5040	5040	5040	5040	5040	5040	5040	5040	5040	5040	5040	5040	5040	5040
ArcelorMittal S.A.				ArcelorMittal Nippon Steel Paradip Steel Plant	India	ArcelorMittal SA [60%]; Nippon Steel Corp [40%]	0.6	7000	4200		N/A			integrated (BF)	BF, BOF	announced	2029				0	0	0	0	0	0	0	0	0	4200	4200	4200	4200	4200	4200	4200	4200	4200	4200	4200	4200	4200	4200	4200	4200	4200	4200	4200	4200
ArcelorMittal S.A.	SIT00003			ArcelorMittal Acciaierie d'Italia Taranto steel plant	Italy	ArcelorMittal SA [40%]; Acciaierie d'italia SpA [60%]	0.4	11500	4600	9500	11500	N/A	N/A	integrated (BF)	BF, BOF	operating	1965				4600	4600	4600	4600	0	0	0	0	0	0	0	0	0	0	0	0	0	0	0	0	0	0	0	0	0	0	0	0	0
ArcelorMittal S.A.	SIT00003	U001094	1	ArcelorMittal Acciaierie d'Italia Taranto steel plant	Italy	ArcelorMittal SA [40%]; Acciaierie d'italia SpA [60%]	0.4	2000	800	2000					BF	operating	1960	2015	N/A	2035	800	800	800	800	0	0	0	0	0	0	0	0	0	0	0	0	0	0	0	0	0	0	0	0	0	0	0	0	0
ArcelorMittal S.A.	SIT00003	U001095	2	ArcelorMittal Acciaierie d'Italia Taranto steel plant	Italy	ArcelorMittal SA [40%]; Acciaierie d'italia SpA [60%]	0.4	2000	800	2000					BF	operating	1960	2022	N/A	2042	800	800	800	800	0	0	0	0	0	0	0	0	0	0	0	0	0	0	0	0	0	0	0	0	0	0	0	0	0
ArcelorMittal S.A.	SIT00003	U001097	4	ArcelorMittal Acciaierie d'Italia Taranto steel plant	Italy	ArcelorMittal SA [40%]; Acciaierie d'italia SpA [60%]	0.4	2000	800	2000					BF	operating	1960	2022	N/A	2042	800	800	800	800	0	0	0	0	0	0	0	0	0	0	0	0	0	0	0	0	0	0	0	0	0	0	0	0	0
ArcelorMittal S.A.	SIT00003	U001340	5	ArcelorMittal Acciaierie d'Italia Taranto steel plant	Italy	ArcelorMittal SA [40%]; Acciaierie d'italia SpA [60%]	0.4	3500	1400	3500					BF	mothballed	November 1974	NA	N/A	2023	1400	1400	1400	1400	0	0	0	0	0	0	0	0	0	0	0	0	0	0	0	0	0	0	0	0	0	0	0	0	0
ArcelorMittal S.A.	SIT00003-1			ArcelorMittal Acciaierie d'Italia Taranto steel plant EAF expansion	Italy	ArcelorMittal SA [40%]; Acciaierie d'italia SpA [60%]	0.4	2500	1000	N/A		N/A	2500	electric	EAF	announced	2024
ArcelorMittal S.A.	SKZ00001			ArcelorMittal Temirtau steel plant	Kazakhstan	ArcelorMittal SA [100%]	1	6000	6000	5125	6000	N/A	N/A	integrated (BF)	BF, BOF	operating	1960				6000	6000	6000	6000	6000	6000	6000	6000	6000	6000	6000	6000	6000	6000	6000	6000	6000	6000	6000	6000	6000	6000	6000	6000	6000	6000	6000	6000	6000
ArcelorMittal S.A.	SKZ00001	U001143	2	ArcelorMittal Temirtau steel plant	Kazakhstan	ArcelorMittal SA [100%]	1	1300	1300	1300					BF	operating	April 2012	2012	N/A	2032	1300	1300	1300	1300	1300	1300	1300	1300	1300	1300	1300	1300	1300	1300	1300	1300	1300	1300	1300	1300	1300	1300	1300	1300	1300	1300	1300	1300	1300
ArcelorMittal S.A.	SKZ00001	U001144	3	ArcelorMittal Temirtau steel plant	Kazakhstan	ArcelorMittal SA [100%]	1	2300	2300	2300					BF	operating	February 2015	2021	N/A	2041	2300	2300	2300	2300	2300	2300	2300	2300	2300	2300	2300	2300	2300	2300	2300	2300	2300	2300	2300	2300	2300	2300	2300	2300	2300	2300	2300	2300	2300
ArcelorMittal S.A.	SKZ00001	U001145	4	ArcelorMittal Temirtau steel plant	Kazakhstan	ArcelorMittal SA [100%]	1	1525	1525	1525					BF	operating	November 2016	2016	N/A	2036	1525	1525	1525	1525	1525	1525	1525	1525	1525	1525	1525	1525	1525	1525	1525	1525	1525	1525	1525	1525	1525	1525	1525	1525	1525	1525	1525	1525	1525
ArcelorMittal S.A.	SLU00001			ArcelorMittal Differdange steel plant	Luxembourg	ArcelorMittal SA [100%]	1	2000	2000	N/A	N/A	N/A	2000	electric	EAF	operating	1896				2000	2000	2000	2000	2000	2000	2000	2000	2000	2000	2000	2000	2000	2000	2000	2000	2000	2000	2000	2000	2000	2000	2000	2000	2000	2000	2000	2000	2000
ArcelorMittal S.A.	SLU00002			ArcelorMittal Esch-Belval steel plant	Luxembourg	ArcelorMittal SA [100%]	1	1000	1000	N/A	N/A	N/A	1000	electric	EAF	operating	1911				1000	1000	1000	1000	1000	1250	1250	1250	1250	1250	1250	1250	1250	1250	1250	1250	1250	1250	1250	1250	1250	1250	1250	1250	1250	1250	1250	1250	1250
ArcelorMittal S.A.	SLU00002-1			ArcelorMittal Esch-Belval steel plant - EAF expansion	Luxembourg	ArcelorMittal SA [100%]	1	250	250	N/A		N/A	250	electric	EAF	construction	2025				0	0	0	0	0	250	250	250	250	250	250	250	250	250	250	250	250	250	250	250	250	250	250	250	250	250	250	250	250
ArcelorMittal S.A.	SMX00002			ArcelorMittal Lázaro Cárdenas steel plant	Mexico	ArcelorMittal SA [100%]	1	6400	6400	1451.91	2400	3200	4000	integrated (BF)	BF, BOF	operating	1976				2400	2400	2400	2400	2400	2400	2400	2400	2400	2400	2400	2400	2400	2400	2400	2400	2400	2400	2400	2400	2400	2400	2400	2400	2400	2400	2400	2400	2400
ArcelorMittal S.A.	SMX00002			ArcelorMittal Lázaro Cárdenas steel plant (DRI-EAF)	Mexico	ArcelorMittal SA [100%]	1					3200	4000	integrated (DRI)	DRI, EAF	operating					4000	4000	4000	4000	4000	4000	4000	4000	4000	4000	4000	4000	4000	4000	4000	4000	4000	4000	4000	4000	4000	4000	4000	4000	4000	4000	4000	4000	4000
ArcelorMittal S.A.	SMX00002	U001149	unknown	ArcelorMittal Lázaro Cárdenas steel plant	Mexico	ArcelorMittal SA [100%]	1	1451.91	1451.91	1451.91					BF	operating	1976	2019	N/A	2039	1451.91	1451.91	1451.91	1451.91	1451.91	1451.91	1451.91	1451.91	1451.91	1451.91	1451.91	1451.91	1451.91	1451.91	1451.91	1451.91	1451.91	1451.91	1451.91	1451.91	1451.91	1451.91	1451.91	1451.91	1451.91	1451.91	1451.91	1451.91	1451.91
ArcelorMittal S.A.	SMA00002			ArcelorMittal Sonasid Casablanca steel plant	Morocco	ArcelorMittal SA [100%]	1	800	800	N/A	N/A	N/A	800	electric	EAF	operating	2002				800	800	800	800	800	800	800	800	800	800	800	800	800	800	800	800	800	800	800	800	800	800	800	800	800	800	800	800	800
ArcelorMittal S.A.	SPL00001			ArcelorMittal Dąbrowa Górnicza steel plant	Poland	ArcelorMittal SA [100%]	1	5000	5000	4500	5000	N/A	N/A	integrated (BF)	BF, BOF	operating	unknown				5000	5000	5000	5000	5000	5000	5000	5000	5000	5000	5000	5000	5000	5000	5000	5000	5000	5000	5000	5000	5000	5000	5000	5000	5000	5000	5000	5000	5000
ArcelorMittal S.A.	SPL00001	U001165	2	ArcelorMittal Dąbrowa Górnicza steel plant	Poland	ArcelorMittal SA [100%]	1	2300	2300	2300					BF	operating	unknown	2023	N/A	2043	2300	2300	2300	2300	2300	2300	2300	2300	2300	2300	2300	2300	2300	2300	2300	2300	2300	2300	2300	2300	2300	2300	2300	2300	2300	2300	2300	2300	2300
ArcelorMittal S.A.	SPL00001	U001166	3	ArcelorMittal Dąbrowa Górnicza steel plant	Poland	ArcelorMittal SA [100%]	1	2200	2200	2200					BF	operating	unknown	NA	N/A	2023	2200	2200	2200	2200	2200	2200	2200	2200	2200	2200	2200	2200	2200	2200	2200	2200	2200	2200	2200	2200	2200	2200	2200	2200	2200	2200	2200	2200	2200
ArcelorMittal S.A.	SPL00006			ArcelorMittal Warszawa steel plant	Poland	ArcelorMittal SA [100%]	1	750	750	N/A	N/A	N/A	750	electric	EAF	operating	1957				750	750	750	750	750	750	750	750	750	750	750	750	750	750	750	750	750	750	750	750	750	750	750	750	750	750	750	750	750
ArcelorMittal S.A.	SRO00002			ArcelorMittal Hunedoara steel plant	Romania	ArcelorMittal Hunedoara SA [100%]	1	800	800	N/A	N/A	N/A	800	electric	EAF	operating	1884				800	800	800	800	800	800	800	800	800	800	800	800	800	800	800	800	800	800	800	800	800	800	800	800	800	800	800	800	800
ArcelorMittal S.A.	SZA00001			ArcelorMittal Newcastle Steel Works	South Africa	Arcelormittal South Africa Ltd [100%]	0.6922	1900	1315.18	2044	1900	N/A	N/A	integrated (BF)	BF, BOF	operating	1971				1315.18	1315.18	1315.18	1315.18	0	0	0	0	0	0	0	0	0	0	0	0	0	0	0	0	0	0	0	0	0	0	0	0	0
ArcelorMittal S.A.	SZA00001-1			ArcelorMittal Newcastle Steel Works transition (EAF addition)	South Africa	Arcelormittal South Africa Ltd [100%]	0.6922	1900	1315.18	N/A		N/A	1900	integrated (BF)	BF, BOF	announced	2034				0	0	0	0	0	0	0	0	0	0	0	0	0	0	0	0	0	0	0	0	0	0	0	0	0	0	0	0	0
ArcelorMittal S.A.	SZA00004			ArcelorMittal Saldanha Steel Works	South Africa	Arcelormittal South Africa Ltd [100%]	0.6922	800	553.76		N/A	800		ironmaking (DRI)	DRI	mothballed	1998				0	0	0	0	0	0	0	0	0	0	0	0	0	0	0	0	0	0	0	0	0	0	0	0	0	0	0	0	0
ArcelorMittal S.A.	SZA00002			ArcelorMittal Vanderbijlpark Steel Works	South Africa	Arcelormittal South Africa Ltd [100%]	0.6922	3400	2353.48	3200	3000	1020	400	integrated (BF)	BF, BOF, DRI, EAF	operating	1947				2353.48	2353.48	2353.48	2353.48	2353.48	2353.48	2353.48	2353.48	2353.48	2353.48	2353.48	2353.48	2353.48	2353.48	2353.48	2353.48	2353.48	2353.48	2353.48	2353.48	2353.48	2353.48	2353.48	2353.48	2353.48	2353.48	2353.48	2353.48	2353.48
ArcelorMittal S.A.	SZA00002			Dummy - ArcelorMittal Vanderbijlpark Steel Works transition (EAF addition)	South Africa	Arcelormittal South Africa Ltd [100%]	0.6922	1700	1176.74		N/A		1700	electric	EAF	announced	2030
ArcelorMittal S.A.	SZA00001	U001346	N5	ArcelorMittal Vanderbijlpark Steel Works	South Africa	Arcelormittal South Africa Ltd [100%]	0.6922	2044	1414.86	2044					BF	operating	1974	2014	N/A	2034	1414.86	1414.86	1414.86	1414.86	1414.86	1414.86	1414.86	1414.86	1414.86	1414.86	1414.86	1414.86	1414.86	1414.86	1414.86	1414.86	1414.86	1414.86	1414.86	1414.86	1414.86	1414.86	1414.86	1414.86	1414.86	1414.86	1414.86	1414.86	1414.86
ArcelorMittal S.A.	SZA00002	U001306	C	ArcelorMittal Vanderbijlpark Steel Works	South Africa	Arcelormittal South Africa Ltd [100%]	0.6922	1300	899.86	1300					BF	operating	1996	2012	N/A	2032	899.86	899.86	899.86	899.86	899.86	899.86	899.86	899.86	899.86	899.86	899.86	899.86	899.86	899.86	899.86	899.86	899.86	899.86	899.86	899.86	899.86	899.86	899.86	899.86	899.86	899.86	899.86	899.86	899.86
ArcelorMittal S.A.	SZA00002-1			ArcelorMittal Vanderbijlpark Steel Works transition (EAF addition)	South Africa	Arcelormittal South Africa Ltd [100%]	0.6922	1700	1176.74				1700	electric	EAF	announced	2030
ArcelorMittal S.A.	SES00001			ArcelorMittal Asturias (Gijón) steel plant	Spain	ArcelorMittal SA [100%]	1	1200	1200	4200	1200	N/A	N/A	integrated (BF)	BF, BOF	operating	unknown				1200	1200	1200	1200	1200	1200	1200	1200	1200	1200	1200	1200	1200	1200	1200	1200	1200	1200	1200	1200	1200	1200	1200	1200	1200	1200	1200	1200	1200
				Dummy - ArcelorMittal Asturias (Gijón) steel plant EAF expansion	Spain								1100	electric	EAF	construction					0	0	0	0	0	0	1100	1100	1100	1100	1100	1100	1100	1100	1100	1100	1100	1100	1100	1100	1100	1100	1100	1100	1100	1100	1100	1100	1100
				Dummy - ArcelorMittal Asturias (Gijón) steel plant DRI expansion	Spain							2300		integrated (DRI)	DRI, EAF	announced					0	0	0	0	0	0	0	0	0	0	0	0	0	0	0	0	0	0	0	0	0	0	0	0	0	0	0	0	0
ArcelorMittal S.A.	SES00001	U000985	A	ArcelorMittal Asturias (Gijón) steel plant	Spain	ArcelorMittal SA [100%]	1	2700	2700	2700					BF	mothballed	unknown	NA	N/A	2023	2700	2700	2700	2700	2700	2700	2700	2700	2700	2700	2700	2700	2700	2700	2700	2700	2700	2700	2700	2700	2700	2700	2700	2700	2700	2700	2700	2700	2700
ArcelorMittal S.A.	SES00001	U000986	B	ArcelorMittal Asturias (Gijón) steel plant	Spain	ArcelorMittal SA [100%]	1	1500	1500	1500					BF	operating	unknown	NA	N/A	2023	1500	1500	1500	1500	1500	1500	1500	1500	1500	1500	1500	1500	1500	1500	1500	1500	1500	1500	1500	1500	1500	1500	1500	1500	1500	1500	1500	1500	1500
ArcelorMittal S.A.	SES00001-1			ArcelorMittal Asturias (Gijón) steel plant DRI and EAF expansion	Spain	ArcelorMittal SA [100%]	1	1100	1100	N/A		2300	1100	integrated (DRI)	DRI, EAF	construction	2025				0	0	0	0	0	0	1100	1100	1100	1100	1100	1100	1100	1100	1100	1100	1100	1100	1100	1100	1100	1100	1100	1100	1100	1100	1100	1100	1100
ArcelorMittal S.A.	SES00007			ArcelorMittal Olaberria-Bergara (Olaberria) steel plant	Spain	ArcelorMittal SA [100%]	1	1450	1450	N/A	N/A	N/A	1450	electric	EAF	operating	1992				1450	1450	1450	1450	1450	1450	1450	1450	1450	1450	1450	1450	1450	1450	1450	1450	1450	1450	1450	1450	1450	1450	1450	1450	1450	1450	1450	1450	1450
ArcelorMittal S.A.	SES00008			ArcelorMittal Asturias (Avilés) steel plant	Spain	ArcelorMittal SA [100%]	1	4200	4200	N/A	4200	N/A	N/A	oxygen	BOF	operating	unknown				4200	4200	4200	4200	4200	4200	4200	4200	4200	4200	4200	4200	4200	4200	4200	4200	4200	4200	4200	4200	4200	4200	4200	4200	4200	4200	4200	4200	4200
ArcelorMittal S.A.	SES00002			ArcelorMittal Sestao steel plant (Bilbao)	Spain	ArcelorMittal SA [100%]	1	2000	2000	N/A	N/A	N/A	2000	electric	EAF	operating	unknown				2000	2000	2000	2000	2000	2000	2000	2000	2000	2000	2000	2000	2000	2000	2000	2000	2000	2000	2000	2000	2000	2000	2000	2000	2000	2000	2000	2000	2000
ArcelorMittal S.A.	SUA00002			ArcelorMittal Kryvyi Rih steel plant	Ukraine	ArcelorMittal SA [100%]	1	8000	8000	11450	6500	N/A	N/A	integrated (BF)	BF, BOF, OHF	operating	1934				8000	8000	2400	2400	2400	2400	2400	2400	2400	2400	2400	2400	2400	2400	2400	2400	2400	2400	2400	2400	2400	2400	2400	2400	2400	2400	2400	2400	2400
ArcelorMittal S.A.	SUA00002	U001241	5	ArcelorMittal Kryvyi Rih steel plant	Ukraine	ArcelorMittal SA [100%]	1	1681	1681	1681					BF	mothballed	1960	2002	unknown	2022	1681	1681	1681	1681	1681	1681	1681	1681	1681	1681	1681	1681	1681	1681	1681	1681	1681	1681	1681	1681	1681	1681	1681	1681	1681	1681	1681	1681	1681
ArcelorMittal S.A.	SUA00002	U001242	6	ArcelorMittal Kryvyi Rih steel plant	Ukraine	ArcelorMittal SA [100%]	1	1360	1360	1360					BF	operating	October 2000	2015	unknown	2035	1360	1360	1360	1360	1360	1360	1360	1360	1360	1360	1360	1360	1360	1360	1360	1360	1360	1360	1360	1360	1360	1360	1360	1360	1360	1360	1360	1360	1360
ArcelorMittal S.A.	SUA00002	U001243	7	ArcelorMittal Kryvyi Rih steel plant	Ukraine	ArcelorMittal SA [100%]	1	1270	1270	1270					BF	mothballed	1962	2020	unknown	2040	1270	1270	1270	1270	1270	1270	1270	1270	1270	1270	1270	1270	1270	1270	1270	1270	1270	1270	1270	1270	1270	1270	1270	1270	1270	1270	1270	1270	1270
ArcelorMittal S.A.	SUA00002	U001244	8	ArcelorMittal Kryvyi Rih steel plant	Ukraine	ArcelorMittal SA [100%]	1	2258.27	2258.27	2258.27					BF	mothballed	1970	2008	unknown	2028	2258.27	2258.27	2258.27	2258.27	2258.27	2258.27	2258.27	2258.27	2258.27	2258.27	2258.27	2258.27	2258.27	2258.27	2258.27	2258.27	2258.27	2258.27	2258.27	2258.27	2258.27	2258.27	2258.27	2258.27	2258.27	2258.27	2258.27	2258.27	2258.27
ArcelorMittal S.A.	SUA00002	U001245	9	ArcelorMittal Kryvyi Rih steel plant	Ukraine	ArcelorMittal SA [100%]	1	4000	4000	4000					BF	mothballed	December 1974	2023	March 2022	2043	4000	4000	4000	4000	4000	4000	4000	4000	4000	4000	4000	4000	4000	4000	4000	4000	4000	4000	4000	4000	4000	4000	4000	4000	4000	4000	4000	4000	4000
ArcelorMittal S.A.	SUS00081			AM/NS Calvert LLC	United States	ArcelorMittal SA [50%]; Nippon Steel Corp [50%]	0.5	1500	750	N/A	N/A	N/A	1500	electric	EAF	operating	2023				0	0	0	750	750	750	750	750	750	750	750	750	750	750	750	750	750	750	750	750	750	750	750	750	750	750	750	750	750
ArcelorMittal S.A.	SUS00053			ArcelorMittal Texas DRI plant	United States	ArcelorMittal SA [80%]; voestalpine AG [20%]	0.8	N/A	1600	N/A	N/A	2000	N/A	ironmaking (DRI)	DRI	operating	2017				0	0	1600	1600	1600	1600	1600	1600	1600	1600	1600	1600	1600	1600	1600	1600	1600	1600	1600	1600	1600	1600	1600	1600	1600	1600	1600	1600	1600
Capacity projection by main production process
Integrated (BF) (including BOF only plants)																					73130.5	73130.5	67530.5	70530.5	64615.3	68815.3	68815.3	68815.3	77215.3	86455.3	86455.3	86455.3	86455.3	86455.3	86455.3	86455.3	86455.3	86455.3	86455.3	86455.3	86455.3	86455.3	86455.3	86455.3	86455.3	86455.3	86455.3	86455.3	86455.3
Electric (scrap-EAF)																					13740	13740	13740	14490	14490	14740	15840	15840	15840	15840	15840	15840	15840	15840	15840	15840	15840	15840	15840	15840	15840	15840	15840	15840	15840	15840	15840	15840	15840
integrated (DRI) (including ironmaking DRI only)																					13448	13448	15048	15048	15048	15048	15048	15048	15048	15048	15048	15048	15048	15048	15048	15048	15048	15048	15048	15048	15048	15048	15048	15048	15048	15048	15048	15048	15048
integrated (BF-EAF)																					1584	1584	1584	1584	1584	1584	2584	2584	2584	2584	2584	2584	2584	2584	2584	2584	2584	2584	2584	2584	2584	2584	2584	2584	2584	2584	2584	2584	2584
Total nominal crude steel production capacity																					101902	101902	97902.5	101652	95737.3	100187	102287	102287	110687	119927	119927	119927	119927	119927	119927	119927	119927	119927	119927	119927	119927	119927	119927	119927	119927	119927	119927	119927	119927
Disclosed nominal crude steel capacity																					85500	82700	82100	80984
Capacity utilization
ArcelorMittal S.A.	SAR00001			ArcelorMittal Acindar Villa Constitución steel plant	Argentina	ArcelorMittal SA [100%]	1	1750	1750	N/A		600	1750	integrated (DRI)	DRI, EAF	operating					0.701916	0.677716	0.602651	0.57123	0.638378	0.638378	0.638378	0.638378	0.638378	0.638378	0.638378	0.638378	0.638378	0.638378	0.638378	0.638378	0.638378	0.638378	0.638378	0.638378	0.638378	0.638378	0.638378	0.638378	0.638378	0.638378	0.638378	0.638378	0.638378
ArcelorMittal S.A.	SBE00001			ArcelorMittal Gent steel plant	Belgium	ArcelorMittal SA [100%]	1	5000	5000	5000		N/A	N/A	integrated (BF)	BF, BOF	operating					0.701916	0.677716	0.602651	0.57123	0.638378	0.638378	0.638378	0.638378	0.638378	0.638378	0.638378	0.638378	0.638378	0.638378	0.638378	0.638378	0.638378	0.638378	0.638378	0.638378	0.638378	0.638378	0.638378	0.638378	0.638378	0.638378	0.638378	0.638378	0.638378
ArcelorMittal S.A.	SBE00001-1			Dummy - ArcelorMittal Gent steel plant (DRI-EAF addition)	Belgium	ArcelorMittal SA [100%]	1	2500	2500	N/A		2500	2500	integrated (DRI)	DRI, EAF	announced					0.701916	0.677716	0.602651	0.57123	0.638378	0.638378	0.638378	0.638378	0.638378	0.638378	0.638378	0.638378	0.638378	0.638378	0.638378	0.638378	0.638378	0.638378	0.638378	0.638378	0.638378	0.638378	0.638378	0.638378	0.638378	0.638378	0.638378	0.638378	0.638378
ArcelorMittal S.A.	SBA00001			ArcelorMittal Zenica steel plant	Bosnia and Herzegovina	ArcelorMittal SA [100%]	1	1940	1940	1100	1140	N/A	800	integrated (BF)	BF, BOF, EAF	operating					0.701916	0.677716	0.602651	0.57123	0.638378	0.638378	0.638378	0.638378	0.638378	0.638378	0.638378	0.638378	0.638378	0.638378	0.638378	0.638378	0.638378	0.638378	0.638378	0.638378	0.638378	0.638378	0.638378	0.638378	0.638378	0.638378	0.638378	0.638378	0.638378
ArcelorMittal S.A.	SBA00001			ArcelorMittal Zenica steel plant (scrap-EAF)	Bosnia and Herzegovina	ArcelorMittal SA [100%]	1						800	electric	EAF	operating					0.701916	0.677716	0.602651	0.57123	0.638378	0.638378	0.638378	0.638378	0.638378	0.638378	0.638378	0.638378	0.638378	0.638378	0.638378	0.638378	0.638378	0.638378	0.638378	0.638378	0.638378	0.638378	0.638378	0.638378	0.638378	0.638378	0.638378	0.638378	0.638378
ArcelorMittal S.A.	SBR00018			ArcelorMittal Barra Mansa steel plant	Brazil	ArcelorMittal SA [100%]	1	800	800	N/A		N/A	800	electric	EAF	operating					0.701916	0.677716	0.602651	0.57123	0.638378	0.638378	0.638378	0.638378	0.638378	0.638378	0.638378	0.638378	0.638378	0.638378	0.638378	0.638378	0.638378	0.638378	0.638378	0.638378	0.638378	0.638378	0.638378	0.638378	0.638378	0.638378	0.638378	0.638378	0.638378
ArcelorMittal S.A.	SBR00013			ArcelorMittal Juiz de Fora steel plant	Brazil	ArcelorMittal SA [100%]	1	1100	1100	360	N/A	N/A	1100	integrated (BF-EAF)	BF, EAF	operating					0.701916	0.677716	0.602651	0.57123	0.638378	0.638378	0.638378	0.638378	0.638378	0.638378	0.638378	0.638378	0.638378	0.638378	0.638378	0.638378	0.638378	0.638378	0.638378	0.638378	0.638378	0.638378	0.638378	0.638378	0.638378	0.638378	0.638378	0.638378	0.638378
ArcelorMittal S.A.	SBR00013			ArcelorMittal Juiz de Fora steel plant (scrap-EAF)	Brazil	ArcelorMittal SA [100%]	1						1100	electric	EAF	operating					0.701916	0.677716	0.602651	0.57123	0.638378	0.638378	0.638378	0.638378	0.638378	0.638378	0.638378	0.638378	0.638378	0.638378	0.638378	0.638378	0.638378	0.638378	0.638378	0.638378	0.638378	0.638378	0.638378	0.638378	0.638378	0.638378	0.638378	0.638378	0.638378
ArcelorMittal S.A.	SBR00003			ArcelorMittal Monlevade steel plant	Brazil	ArcelorMittal SA [100%]	1	1200	1200	1040		N/A	N/A	integrated (BF)	BF, BOF	operating					0.701916	0.677716	0.602651	0.57123	0.638378	0.638378	0.638378	0.638378	0.638378	0.638378	0.638378	0.638378	0.638378	0.638378	0.638378	0.638378	0.638378	0.638378	0.638378	0.638378	0.638378	0.638378	0.638378	0.638378	0.638378	0.638378	0.638378	0.638378	0.638378
ArcelorMittal S.A.	SBR00003			Dummy - ArcelorMittal Monlevade steel plant (BF-EAF)	Brazil	ArcelorMittal SA [100%]	1			1200			1000	integrated (BF-EAF)	BF, EAF	construction					0.701916	0.677716	0.602651	0.57123	0.638378	0.638378	0.638378	0.638378	0.638378	0.638378	0.638378	0.638378	0.638378	0.638378	0.638378	0.638378	0.638378	0.638378	0.638378	0.638378	0.638378	0.638378	0.638378	0.638378	0.638378	0.638378	0.638378	0.638378	0.638378
ArcelorMittal S.A.	SBR00008			ArcelorMittal Pecém steel plant	Brazil	ArcelorMittal SA [100%]	1	3000	3000	3192		N/A	N/A	integrated (BF)	BF, BOF	operating					0.701916	0.677716	0.602651	0.57123	0.638378	0.638378	0.638378	0.638378	0.638378	0.638378	0.638378	0.638378	0.638378	0.638378	0.638378	0.638378	0.638378	0.638378	0.638378	0.638378	0.638378	0.638378	0.638378	0.638378	0.638378	0.638378	0.638378	0.638378	0.638378
ArcelorMittal S.A.	SBR00009			ArcelorMittal Piracicaba steel plant	Brazil	ArcelorMittal SA [100%]	1	1100	1100	N/A		N/A	1100	electric	EAF	operating					0.701916	0.677716	0.602651	0.57123	0.638378	0.638378	0.638378	0.638378	0.638378	0.638378	0.638378	0.638378	0.638378	0.638378	0.638378	0.638378	0.638378	0.638378	0.638378	0.638378	0.638378	0.638378	0.638378	0.638378	0.638378	0.638378	0.638378	0.638378	0.638378
ArcelorMittal S.A.	SBR00004			ArcelorMittal Resende steel plant	Brazil	ArcelorMittal SA [100%]	1	1000	1000	N/A		N/A	1000	electric	EAF	operating					0.701916	0.677716	0.602651	0.57123	0.638378	0.638378	0.638378	0.638378	0.638378	0.638378	0.638378	0.638378	0.638378	0.638378	0.638378	0.638378	0.638378	0.638378	0.638378	0.638378	0.638378	0.638378	0.638378	0.638378	0.638378	0.638378	0.638378	0.638378	0.638378
ArcelorMittal S.A.	SBR00002			ArcelorMittal Tubarão steel plant	Brazil	ArcelorMittal SA [100%]	1	7500	7500	7280		N/A	N/A	integrated (BF)	BF, BOF	operating					0.701916	0.677716	0.602651	0.57123	0.638378	0.638378	0.638378	0.638378	0.638378	0.638378	0.638378	0.638378	0.638378	0.638378	0.638378	0.638378	0.638378	0.638378	0.638378	0.638378	0.638378	0.638378	0.638378	0.638378	0.638378	0.638378	0.638378	0.638378	0.638378
ArcelorMittal S.A.	SCA00002			ArcelorMittal Dofasco steel plant	Canada	ArcelorMittal SA [100%]	1	4050	4050	3024		N/A	1350	integrated (BF)	BF, BOF, EAF	operating					0.701916	0.677716	0.602651	0.57123	0.638378	0.638378	0.638378	0.638378	0.638378	0.638378	0.638378	0.638378	0.638378	0.638378	0.638378	0.638378	0.638378	0.638378	0.638378	0.638378	0.638378	0.638378	0.638378	0.638378	0.638378	0.638378	0.638378	0.638378	0.638378
ArcelorMittal S.A.	SCA00002			Dummy - ArcelorMittal Dofasco steel plant transition (DRI-EAF addition)	Canada	ArcelorMittal SA [100%]	1	2400	2400	N/A		2649	2400	integrated (DRI)	DRI, EAF	announced					0.701916	0.677716	0.602651	0.57123	0.638378	0.638378	0.638378	0.638378	0.638378	0.638378	0.638378	0.638378	0.638378	0.638378	0.638378	0.638378	0.638378	0.638378	0.638378	0.638378	0.638378	0.638378	0.638378	0.638378	0.638378	0.638378	0.638378	0.638378	0.638378
ArcelorMittal S.A.	SCA00001			ArcelorMittal Montreal steel plant	Canada	ArcelorMittal SA [100%]	1	2400	2400	N/A		1000	2400	integrated (DRI)	DRI, EAF	operating					0.701916	0.677716	0.602651	0.57123	0.638378	0.638378	0.638378	0.638378	0.638378	0.638378	0.638378	0.638378	0.638378	0.638378	0.638378	0.638378	0.638378	0.638378	0.638378	0.638378	0.638378	0.638378	0.638378	0.638378	0.638378	0.638378	0.638378	0.638378	0.638378
ArcelorMittal S.A.	SFR00001			ArcelorMittal Dunkerque steel plant	France	ArcelorMittal SA [100%]	1	6750	6750	6900		N/A	N/A	integrated (BF)	BF, BOF	operating					0.701916	0.677716	0.602651	0.57123	0.638378	0.638378	0.638378	0.638378	0.638378	0.638378	0.638378	0.638378	0.638378	0.638378	0.638378	0.638378	0.638378	0.638378	0.638378	0.638378	0.638378	0.638378	0.638378	0.638378	0.638378	0.638378	0.638378	0.638378	0.638378
ArcelorMittal S.A.	SFR00001-1			Dummy - ArcelorMittal Dunkerque steel plant transition (DRI and EAF addition)	France	ArcelorMittal SA [100%]	1	4500	4500	N/A		2500	4500	integrated (DRI)	DRI, EAF	announced					0.701916	0.677716	0.602651	0.57123	0.638378	0.638378	0.638378	0.638378	0.638378	0.638378	0.638378	0.638378	0.638378	0.638378	0.638378	0.638378	0.638378	0.638378	0.638378	0.638378	0.638378	0.638378	0.638378	0.638378	0.638378	0.638378	0.638378	0.638378	0.638378
ArcelorMittal S.A.	SFR00002			ArcelorMittal Méditerranée Fos sur Mer steel plant	France	ArcelorMittal SA [100%]	1	4000	4000	4000		N/A	N/A	integrated (BF)	BF, BOF	operating					0.701916	0.677716	0.602651	0.57123	0.638378	0.638378	0.638378	0.638378	0.638378	0.638378	0.638378	0.638378	0.638378	0.638378	0.638378	0.638378	0.638378	0.638378	0.638378	0.638378	0.638378	0.638378	0.638378	0.638378	0.638378	0.638378	0.638378	0.638378	0.638378
ArcelorMittal S.A.	SFR00002-1			Dummy - ArcelorMittal Méditerranée Fos sur Mer steel plant transition (EAF addition)	France	ArcelorMittal SA [100%]	1	2000	2000	N/A		N/A	2000	electric	EAF	announced					0.701916	0.677716	0.602651	0.57123	0.638378	0.638378	0.638378	0.638378	0.638378	0.638378	0.638378	0.638378	0.638378	0.638378	0.638378	0.638378	0.638378	0.638378	0.638378	0.638378	0.638378	0.638378	0.638378	0.638378	0.638378	0.638378	0.638378	0.638378	0.638378
ArcelorMittal S.A.	SDE00003			AG der Dillinger Hüttenwerke Dillingen steel plant	Germany	SHS Stahl Holding Saar GmbH & Co KgaA [57.2%]; ArcelorMittal SA [33.4%]; Saarstahl AG [9.4%]	0.334	2760	921.84	4790		N/A	N/A	integrated (BF)	BF, BOF	operating					0.701916	0.677716	0.602651	0.57123	0.638378	0.638378	0.638378	0.638378	0.638378	0.638378	0.638378	0.638378	0.638378	0.638378	0.638378	0.638378	0.638378	0.638378	0.638378	0.638378	0.638378	0.638378	0.638378	0.638378	0.638378	0.638378	0.638378	0.638378	0.638378
ArcelorMittal S.A.	SDE00003-1			Dummy - AG der Dillinger Hüttenwerke Dillingen steel plant transition (DRI-EAF addition)	Germany	SHS Stahl Holding Saar GmbH & Co KgaA [57.2%]; ArcelorMittal SA [33.4%]; Saarstahl AG [9.4%]	0.334	1750	584.5	N/A		2500	1750	integrated (DRI)	DRI, EAF	announced					0.701916	0.677716	0.602651	0.57123	0.638378	0.638378	0.638378	0.638378	0.638378	0.638378	0.638378	0.638378	0.638378	0.638378	0.638378	0.638378	0.638378	0.638378	0.638378	0.638378	0.638378	0.638378	0.638378	0.638378	0.638378	0.638378	0.638378	0.638378	0.638378
ArcelorMittal S.A.	SDE00006			ArcelorMittal Bremen steel plant	Germany	ArcelorMittal SA [100%]	1	3800	3800	3800		N/A	N/A	integrated (BF)	BF, BOF	operating					0.701916	0.677716	0.602651	0.57123	0.638378	0.638378	0.638378	0.638378	0.638378	0.638378	0.638378	0.638378	0.638378	0.638378	0.638378	0.638378	0.638378	0.638378	0.638378	0.638378	0.638378	0.638378	0.638378	0.638378	0.638378	0.638378	0.638378	0.638378	0.638378
ArcelorMittal S.A.	SDE00006-1			Dummy - ArcelorMittal Bremen steel plant transition (DRI-EAF addition)	Germany	ArcelorMittal SA [100%]	1	1750	1750	N/A		2000	1750	integrated (DRI)	DRI, EAF	announced					0.701916	0.677716	0.602651	0.57123	0.638378	0.638378	0.638378	0.638378	0.638378	0.638378	0.638378	0.638378	0.638378	0.638378	0.638378	0.638378	0.638378	0.638378	0.638378	0.638378	0.638378	0.638378	0.638378	0.638378	0.638378	0.638378	0.638378	0.638378	0.638378
ArcelorMittal S.A.	SDE00008			ArcelorMittal Duisburg steel plant	Germany	ArcelorMittal SA [100%]	1	1300	1300	N/A		N/A	N/A	oxygen	BOF	operating					0.701916	0.677716	0.602651	0.57123	0.638378	0.638378	0.638378	0.638378	0.638378	0.638378	0.638378	0.638378	0.638378	0.638378	0.638378	0.638378	0.638378	0.638378	0.638378	0.638378	0.638378	0.638378	0.638378	0.638378	0.638378	0.638378	0.638378	0.638378	0.638378
ArcelorMittal S.A.	SDE00008-1			Dummy - ArcelorMittal Duisburg steel plant transition (EAF addition)	Germany	ArcelorMittal SA [100%]	1	1300	1300	N/A		N/A	1300	electric	EAF	announced					0.701916	0.677716	0.602651	0.57123	0.638378	0.638378	0.638378	0.638378	0.638378	0.638378	0.638378	0.638378	0.638378	0.638378	0.638378	0.638378	0.638378	0.638378	0.638378	0.638378	0.638378	0.638378	0.638378	0.638378	0.638378	0.638378	0.638378	0.638378	0.638378
ArcelorMittal S.A.	SDE00005			ArcelorMittal Eisenhüttenstadt steel plant	Germany	ArcelorMittal SA [100%]	1	2400	2400	1825		N/A	N/A	integrated (BF)	BF, BOF	operating					0.701916	0.677716	0.602651	0.57123	0.638378	0.638378	0.638378	0.638378	0.638378	0.638378	0.638378	0.638378	0.638378	0.638378	0.638378	0.638378	0.638378	0.638378	0.638378	0.638378	0.638378	0.638378	0.638378	0.638378	0.638378	0.638378	0.638378	0.638378	0.638378
ArcelorMittal S.A.	SDE00005-1			Dummy - ArcelorMittal Eisenhüttenstadt steel plant transition (DRI-EAF addition)	Germany	ArcelorMittal SA [100%]	1	1750	1750	N/A		>0	1750	integrated (DRI)	DRI, EAF	announced					0.701916	0.677716	0.602651	0.57123	0.638378	0.638378	0.638378	0.638378	0.638378	0.638378	0.638378	0.638378	0.638378	0.638378	0.638378	0.638378	0.638378	0.638378	0.638378	0.638378	0.638378	0.638378	0.638378	0.638378	0.638378	0.638378	0.638378	0.638378	0.638378
ArcelorMittal S.A.	SDE00007			ArcelorMittal Hamburg steel plant	Germany	ArcelorMittal SA [100%]	1	1100	1100	N/A		600	1100	integrated (DRI)	DRI, EAF	operating					0.701916	0.677716	0.602651	0.57123	0.638378	0.638378	0.638378	0.638378	0.638378	0.638378	0.638378	0.638378	0.638378	0.638378	0.638378	0.638378	0.638378	0.638378	0.638378	0.638378	0.638378	0.638378	0.638378	0.638378	0.638378	0.638378	0.638378	0.638378	0.638378
ArcelorMittal S.A.	SDE00007			ArcelorMittal Hamburg steel plant (scrap-EAF)	Germany	ArcelorMittal SA [100%]	1						1100	electric	EAF	operating					0.701916	0.677716	0.602651	0.57123	0.638378	0.638378	0.638378	0.638378	0.638378	0.638378	0.638378	0.638378	0.638378	0.638378	0.638378	0.638378	0.638378	0.638378	0.638378	0.638378	0.638378	0.638378	0.638378	0.638378	0.638378	0.638378	0.638378	0.638378	0.638378
ArcelorMittal S.A.	SIN00066			ArcelorMittal Nippon Steel Kendrapara plant	India	ArcelorMittal SA [60%]; Nippon Steel Corp [40%]	0.6	14000	8400	unknown		unknown	N/A	oxygen	BOF	announced					0.701916	0.677716	0.602651	0.57123	0.638378	0.638378	0.638378	0.638378	0.638378	0.638378	0.638378	0.638378	0.638378	0.638378	0.638378	0.638378	0.638378	0.638378	0.638378	0.638378	0.638378	0.638378	0.638378	0.638378	0.638378	0.638378	0.638378	0.638378	0.638378
ArcelorMittal S.A.	SIN00004			ArcelorMittal Nippon Steel India Hazira Plant	India	ArcelorMittal SA [60%]; Nippon Steel Corp [40%]	0.6	9600	5760	2040		7830	9600	integrated (BF-EAF)	BF, DRI, EAF	operating					0.701916	0.677716	0.602651	0.57123	0.638378	0.638378	0.638378	0.638378	0.638378	0.638378	0.638378	0.638378	0.638378	0.638378	0.638378	0.638378	0.638378	0.638378	0.638378	0.638378	0.638378	0.638378	0.638378	0.638378	0.638378	0.638378	0.638378	0.638378	0.638378
ArcelorMittal S.A.	SIN00004			ArcelorMittal Nippon Steel India Hazira Plant	India	ArcelorMittal SA [60%]; Nippon Steel Corp [40%]	0.6					7830		integrated (DRI)	DRI, EAF	operating					0.701916	0.677716	0.602651	0.57123	0.638378	0.638378	0.638378	0.638378	0.638378	0.638378	0.638378	0.638378	0.638378	0.638378	0.638378	0.638378	0.638378	0.638378	0.638378	0.638378	0.638378	0.638378	0.638378	0.638378	0.638378	0.638378	0.638378	0.638378	0.638378
ArcelorMittal S.A.	SIN00004			ArcelorMittal Nippon Steel India Hazira Plant	India	ArcelorMittal SA [60%]; Nippon Steel Corp [40%]	0.6				6000			integrated (BF)	BF, BOF	construction					0.701916	0.677716	0.602651	0.57123	0.638378	0.638378	0.638378	0.638378	0.638378	0.638378	0.638378	0.638378	0.638378	0.638378	0.638378	0.638378	0.638378	0.638378	0.638378	0.638378	0.638378	0.638378	0.638378	0.638378	0.638378	0.638378	0.638378	0.638378	0.638378
ArcelorMittal S.A.				ArcelorMittal Nippon Steel Paradip Steel Plant	India	ArcelorMittal SA [60%]; Nippon Steel Corp [40%]	0.6	7000	4200					integrated (BF)	BF, BOF	announced					0.701916	0.677716	0.602651	0.57123	0.638378	0.638378	0.638378	0.638378	0.638378	0.638378	0.638378	0.638378	0.638378	0.638378	0.638378	0.638378	0.638378	0.638378	0.638378	0.638378	0.638378	0.638378	0.638378	0.638378	0.638378	0.638378	0.638378	0.638378	0.638378
ArcelorMittal S.A.	SIT00003			ArcelorMittal Acciaierie d'Italia Taranto steel plant	Italy	ArcelorMittal SA [40%]; Acciaierie d'italia SpA [60%]	0.4	11500	4600	9500		N/A	N/A	integrated (BF)	BF, BOF	operating					0.701916	0.677716	0.602651	0.57123	0.638378	0.638378	0.638378	0.638378	0.638378	0.638378	0.638378	0.638378	0.638378	0.638378	0.638378	0.638378	0.638378	0.638378	0.638378	0.638378	0.638378	0.638378	0.638378	0.638378	0.638378	0.638378	0.638378	0.638378	0.638378
ArcelorMittal S.A.	SKZ00001			ArcelorMittal Temirtau steel plant	Kazakhstan	ArcelorMittal SA [100%]	1	6000	6000	5125		N/A	N/A	integrated (BF)	BF, BOF	operating					0.701916	0.677716	0.602651	0.57123	0.638378	0.638378	0.638378	0.638378	0.638378	0.638378	0.638378	0.638378	0.638378	0.638378	0.638378	0.638378	0.638378	0.638378	0.638378	0.638378	0.638378	0.638378	0.638378	0.638378	0.638378	0.638378	0.638378	0.638378	0.638378
ArcelorMittal S.A.	SLU00001			ArcelorMittal Differdange steel plant	Luxembourg	ArcelorMittal SA [100%]	1	2000	2000	N/A		N/A	2000	electric	EAF	operating					0.701916	0.677716	0.602651	0.57123	0.638378	0.638378	0.638378	0.638378	0.638378	0.638378	0.638378	0.638378	0.638378	0.638378	0.638378	0.638378	0.638378	0.638378	0.638378	0.638378	0.638378	0.638378	0.638378	0.638378	0.638378	0.638378	0.638378	0.638378	0.638378
ArcelorMittal S.A.	SLU00002			ArcelorMittal Esch-Belval steel plant	Luxembourg	ArcelorMittal SA [100%]	1	1000	1000	N/A		N/A	1000	electric	EAF	operating					0.701916	0.677716	0.602651	0.57123	0.638378	0.638378	0.638378	0.638378	0.638378	0.638378	0.638378	0.638378	0.638378	0.638378	0.638378	0.638378	0.638378	0.638378	0.638378	0.638378	0.638378	0.638378	0.638378	0.638378	0.638378	0.638378	0.638378	0.638378	0.638378
ArcelorMittal S.A.	SMX00002			ArcelorMittal Lázaro Cárdenas steel plant	Mexico	ArcelorMittal SA [100%]	1	6400	6400	1451.91	2400	3200	4000	integrated (BF)	BF, BOF	operating					0.701916	0.677716	0.602651	0.57123	0.638378	0.638378	0.638378	0.638378	0.638378	0.638378	0.638378	0.638378	0.638378	0.638378	0.638378	0.638378	0.638378	0.638378	0.638378	0.638378	0.638378	0.638378	0.638378	0.638378	0.638378	0.638378	0.638378	0.638378	0.638378
ArcelorMittal S.A.	SMX00002			ArcelorMittal Lázaro Cárdenas steel plant (DRI-EAF)	Mexico	ArcelorMittal SA [100%]	1					3200	4000	integrated (DRI)	DRI, EAF	operating					0.701916	0.677716	0.602651	0.57123	0.638378	0.638378	0.638378	0.638378	0.638378	0.638378	0.638378	0.638378	0.638378	0.638378	0.638378	0.638378	0.638378	0.638378	0.638378	0.638378	0.638378	0.638378	0.638378	0.638378	0.638378	0.638378	0.638378	0.638378	0.638378
ArcelorMittal S.A.	SMA00002			ArcelorMittal Sonasid Casablanca steel plant	Morocco	ArcelorMittal SA [100%]	1	800	800	N/A		N/A	800	electric	EAF	operating					0.701916	0.677716	0.602651	0.57123	0.638378	0.638378	0.638378	0.638378	0.638378	0.638378	0.638378	0.638378	0.638378	0.638378	0.638378	0.638378	0.638378	0.638378	0.638378	0.638378	0.638378	0.638378	0.638378	0.638378	0.638378	0.638378	0.638378	0.638378	0.638378
ArcelorMittal S.A.	SPL00001			ArcelorMittal Dąbrowa Górnicza steel plant	Poland	ArcelorMittal SA [100%]	1	5000	5000	4500		N/A	N/A	integrated (BF)	BF, BOF	operating					0.701916	0.677716	0.602651	0.57123	0.638378	0.638378	0.638378	0.638378	0.638378	0.638378	0.638378	0.638378	0.638378	0.638378	0.638378	0.638378	0.638378	0.638378	0.638378	0.638378	0.638378	0.638378	0.638378	0.638378	0.638378	0.638378	0.638378	0.638378	0.638378
ArcelorMittal S.A.	SPL00006			ArcelorMittal Warszawa steel plant	Poland	ArcelorMittal SA [100%]	1	750	750	N/A		N/A	750	electric	EAF	operating					0.701916	0.677716	0.602651	0.57123	0.638378	0.638378	0.638378	0.638378	0.638378	0.638378	0.638378	0.638378	0.638378	0.638378	0.638378	0.638378	0.638378	0.638378	0.638378	0.638378	0.638378	0.638378	0.638378	0.638378	0.638378	0.638378	0.638378	0.638378	0.638378
ArcelorMittal S.A.	SRO00002			ArcelorMittal Hunedoara steel plant	Romania	ArcelorMittal Hunedoara SA [100%]	1	800	800	N/A		N/A	800	electric	EAF	operating					0.701916	0.677716	0.602651	0.57123	0.638378	0.638378	0.638378	0.638378	0.638378	0.638378	0.638378	0.638378	0.638378	0.638378	0.638378	0.638378	0.638378	0.638378	0.638378	0.638378	0.638378	0.638378	0.638378	0.638378	0.638378	0.638378	0.638378	0.638378	0.638378
ArcelorMittal S.A.	SZA00001			ArcelorMittal Newcastle Steel Works	South Africa	Arcelormittal South Africa Ltd [100%]	0.6922	1900	1900	2044		N/A	N/A	integrated (BF)	BF, BOF	operating					0.701916	0.677716	0.602651	0.57123	0.638378	0.638378	0.638378	0.638378	0.638378	0.638378	0.638378	0.638378	0.638378	0.638378	0.638378	0.638378	0.638378	0.638378	0.638378	0.638378	0.638378	0.638378	0.638378	0.638378	0.638378	0.638378	0.638378	0.638378	0.638378
ArcelorMittal S.A.	SZA00004			ArcelorMittal Saldanha Steel Works	South Africa	Arcelormittal South Africa Ltd [100%]	0.6922	1200	1200	760		800	1200	ironmaking (DRI)	BF, DRI, EAF	mothballed					0.701916	0.677716	0.602651	0.57123	0.638378	0.638378	0.638378	0.638378	0.638378	0.638378	0.638378	0.638378	0.638378	0.638378	0.638378	0.638378	0.638378	0.638378	0.638378	0.638378	0.638378	0.638378	0.638378	0.638378	0.638378	0.638378	0.638378	0.638378	0.638378
ArcelorMittal S.A.	SZA00002			ArcelorMittal Vanderbijlpark Steel Works	South Africa	Arcelormittal South Africa Ltd [100%]	0.6922	4500	4500	3200		950	N/A	integrated (BF)	BF, BOF, DRI	operating					0.701916	0.677716	0.602651	0.57123	0.638378	0.638378	0.638378	0.638378	0.638378	0.638378	0.638378	0.638378	0.638378	0.638378	0.638378	0.638378	0.638378	0.638378	0.638378	0.638378	0.638378	0.638378	0.638378	0.638378	0.638378	0.638378	0.638378	0.638378	0.638378
ArcelorMittal S.A.	SZA00002			Dummy - ArcelorMittal Vanderbijlpark Steel Works transition (EAF addition)	South Africa	Arcelormittal South Africa Ltd [100%]	0.6922	1700	1176.74		N/A		1700	electric	EAF	announced					0.701916	0.677716	0.602651	0.57123	0.638378	0.638378	0.638378	0.638378	0.638378	0.638378	0.638378	0.638378	0.638378	0.638378	0.638378	0.638378	0.638378	0.638378	0.638378	0.638378	0.638378	0.638378	0.638378	0.638378	0.638378	0.638378	0.638378	0.638378	0.638378
ArcelorMittal S.A.	SES00001			ArcelorMittal Asturias (Gijón) steel plant	Spain	ArcelorMittal SA [100%]	1	1200	1200	4200		N/A	N/A	integrated (BF)	BF, BOF	operating					0.701916	0.677716	0.602651	0.57123	0.638378	0.638378	0.638378	0.638378	0.638378	0.638378	0.638378	0.638378	0.638378	0.638378	0.638378	0.638378	0.638378	0.638378	0.638378	0.638378	0.638378	0.638378	0.638378	0.638378	0.638378	0.638378	0.638378	0.638378	0.638378
ArcelorMittal S.A.	SES00001			Dummy - ArcelorMittal Asturias (Gijón) steel plant EAF expansion	Spain	ArcelorMittal SA [100%]	1							electric	EAF	construction					0.701916	0.677716	0.602651	0.57123	0.638378	0.638378	0.638378	0.638378	0.638378	0.638378	0.638378	0.638378	0.638378	0.638378	0.638378	0.638378	0.638378	0.638378	0.638378	0.638378	0.638378	0.638378	0.638378	0.638378	0.638378	0.638378	0.638378	0.638378	0.638378
ArcelorMittal S.A.	SES00001			Dummy - ArcelorMittal Asturias (Gijón) steel plant DRI expansion	Spain	ArcelorMittal SA [100%]	1							integrated (DRI)	DRI, EAF	announced					0.701916	0.677716	0.602651	0.57123	0.638378	0.638378	0.638378	0.638378	0.638378	0.638378	0.638378	0.638378	0.638378	0.638378	0.638378	0.638378	0.638378	0.638378	0.638378	0.638378	0.638378	0.638378	0.638378	0.638378	0.638378	0.638378	0.638378	0.638378	0.638378
ArcelorMittal S.A.	SES00007			ArcelorMittal Olaberria-Bergara (Olaberria) steel plant	Spain	ArcelorMittal SA [100%]	1	1450	1450	N/A		N/A	1450	electric	EAF	operating					0.701916	0.677716	0.602651	0.57123	0.638378	0.638378	0.638378	0.638378	0.638378	0.638378	0.638378	0.638378	0.638378	0.638378	0.638378	0.638378	0.638378	0.638378	0.638378	0.638378	0.638378	0.638378	0.638378	0.638378	0.638378	0.638378	0.638378	0.638378	0.638378
ArcelorMittal S.A.	SES00008			ArcelorMittal Asturias (Avilés) steel plant	Spain	ArcelorMittal SA [100%]	1	4200	4200	N/A		N/A	N/A	oxygen	BOF	operating					0.701916	0.677716	0.602651	0.57123	0.638378	0.638378	0.638378	0.638378	0.638378	0.638378	0.638378	0.638378	0.638378	0.638378	0.638378	0.638378	0.638378	0.638378	0.638378	0.638378	0.638378	0.638378	0.638378	0.638378	0.638378	0.638378	0.638378	0.638378	0.638378
ArcelorMittal S.A.	SES00002			ArcelorMittal Sestao steel plant	Spain	ArcelorMittal SA [100%]	1	2000	2000	N/A		N/A	2000	electric	EAF	operating					0.701916	0.677716	0.602651	0.57123	0.638378	0.638378	0.638378	0.638378	0.638378	0.638378	0.638378	0.638378	0.638378	0.638378	0.638378	0.638378	0.638378	0.638378	0.638378	0.638378	0.638378	0.638378	0.638378	0.638378	0.638378	0.638378	0.638378	0.638378	0.638378
ArcelorMittal S.A.	SUA00002			ArcelorMittal Kryvyi Rih steel plant	Ukraine	ArcelorMittal SA [100%]	1	8000	8000	11450		N/A	N/A	integrated (BF)	BF, BOF, OHF	operating					0.701916	0.677716	0.602651	0.57123	0.638378	0.638378	0.638378	0.638378	0.638378	0.638378	0.638378	0.638378	0.638378	0.638378	0.638378	0.638378	0.638378	0.638378	0.638378	0.638378	0.638378	0.638378	0.638378	0.638378	0.638378	0.638378	0.638378	0.638378	0.638378
ArcelorMittal S.A.	SUS00081			AM/NS Calvert LLC	United States	ArcelorMittal SA [50%]; Nippon Steel Corp [50%]	0.5	1500	750	N/A		N/A	1500	electric	EAF	operating					0.701916	0.677716	0.602651	0.57123	0.638378	0.638378	0.638378	0.638378	0.638378	0.638378	0.638378	0.638378	0.638378	0.638378	0.638378	0.638378	0.638378	0.638378	0.638378	0.638378	0.638378	0.638378	0.638378	0.638378	0.638378	0.638378	0.638378	0.638378	0.638378
ArcelorMittal S.A.	SUS00053			ArcelorMittal Texas DRI plant	United States	ArcelorMittal SA [80%]; voestalpine AG [20%]	0.8	N/A	1600	N/A		2000	N/A	ironmaking (DRI)	DRI	operating					0.701916	0.677716	0.602651	0.57123	0.638378	0.638378	0.638378	0.638378	0.638378	0.638378	0.638378	0.638378	0.638378	0.638378	0.638378	0.638378	0.638378	0.638378	0.638378	0.638378	0.638378	0.638378	0.638378	0.638378	0.638378	0.638378	0.638378	0.638378	0.638378
Company wide average Utilization Rate																					0.701916	0.677716	0.602651	0.57123	0.638378
Production output trajectory (mt crude steel produced)
ArcelorMittal S.A.	SAR00001			ArcelorMittal Acindar Villa Constitución steel plant	Argentina	ArcelorMittal SA [100%]	1	1750	1750	N/A		600	1750	integrated (DRI)	DRI, EAF	operating					1228.35	1186	1054.64	999.653	1117.16	1117.16	1117.16	1117.16	1117.16	1117.16	1117.16	1117.16	1117.16	1117.16	1117.16	1117.16	1117.16	1117.16	1117.16	1117.16	1117.16	1117.16	1117.16	1117.16	1117.16	1117.16	1117.16	1117.16	1117.16
ArcelorMittal S.A.	SBE00001			ArcelorMittal Gent steel plant	Belgium	ArcelorMittal SA [100%]	1	5000	5000	5000		N/A	N/A	integrated (BF)	BF, BOF	operating					3509.58	3388.58	3013.25	2856.15	3191.89	3191.89	3191.89	3191.89	3191.89	3191.89	3191.89	3191.89	3191.89	3191.89	3191.89	3191.89	3191.89	3191.89	3191.89	3191.89	3191.89	3191.89	3191.89	3191.89	3191.89	3191.89	3191.89	3191.89	3191.89
ArcelorMittal S.A.	SBE00001-1			Dummy - ArcelorMittal Gent steel plant (DRI-EAF addition)	Belgium	ArcelorMittal SA [100%]	1	2500	2500	N/A		2500	2500	integrated (DRI)	DRI, EAF	announced					0	0	0	0	0	0	0	0	0	0	0	0	0	0	0	0	0	0	0	0	0	0	0	0	0	0	0	0	0
ArcelorMittal S.A.	SBA00001			ArcelorMittal Zenica steel plant	Bosnia and Herzegovina	ArcelorMittal SA [100%]	1	1940	1940	1100	1140	N/A	800	integrated (BF)	BF, BOF, EAF	operating					800.184	772.597	687.022	651.203	727.751	727.751	727.751	727.751	727.751	727.751	727.751	727.751	727.751	727.751	727.751	727.751	727.751	727.751	727.751	727.751	727.751	727.751	727.751	727.751	727.751	727.751	727.751	727.751	727.751
ArcelorMittal S.A.	SBA00001			ArcelorMittal Zenica steel plant (scrap-EAF)	Bosnia and Herzegovina	ArcelorMittal SA [100%]	1						800	electric	EAF	operating					561.533	542.173	482.12	456.984	510.703	510.703	510.703	510.703	510.703	510.703	510.703	510.703	510.703	510.703	510.703	510.703	510.703	510.703	510.703	510.703	510.703	510.703	510.703	510.703	510.703	510.703	510.703	510.703	510.703
ArcelorMittal S.A.	SBR00018			ArcelorMittal Barra Mansa steel plant	Brazil	ArcelorMittal SA [100%]	1	800	800	N/A		N/A	800	electric	EAF	operating					561.533	542.173	482.12	456.984	510.703	510.703	510.703	510.703	510.703	510.703	510.703	510.703	510.703	510.703	510.703	510.703	510.703	510.703	510.703	510.703	510.703	510.703	510.703	510.703	510.703	510.703	510.703	510.703	510.703
ArcelorMittal S.A.	SBR00013			ArcelorMittal Juiz de Fora steel plant	Brazil	ArcelorMittal SA [100%]	1	1100	1100	360	N/A	N/A	1100	integrated (BF-EAF)	BF, EAF	operating					252.69	243.978	216.954	205.643	229.816	229.816	229.816	229.816	229.816	229.816	229.816	229.816	229.816	229.816	229.816	229.816	229.816	229.816	229.816	229.816	229.816	229.816	229.816	229.816	229.816	229.816	229.816	229.816	229.816
ArcelorMittal S.A.	SBR00013			ArcelorMittal Juiz de Fora steel plant (scrap-EAF)	Brazil	ArcelorMittal SA [100%]	1						1100	electric	EAF	operating					519.418	501.51	445.961	422.711	472.4	472.4	472.4	472.4	472.4	472.4	472.4	472.4	472.4	472.4	472.4	472.4	472.4	472.4	472.4	472.4	472.4	472.4	472.4	472.4	472.4	472.4	472.4	472.4	472.4
ArcelorMittal S.A.	SBR00003			ArcelorMittal Monlevade steel plant	Brazil	ArcelorMittal SA [100%]	1	1200	1200	1040		N/A	N/A	integrated (BF)	BF, BOF	operating					842.299	813.26	723.181	685.477	766.054	766.054	766.054	766.054	766.054	766.054	766.054	766.054	766.054	766.054	766.054	766.054	766.054	766.054	766.054	766.054	766.054	766.054	766.054	766.054	766.054	766.054	766.054	766.054	766.054
ArcelorMittal S.A.	SBR00003			Dummy - ArcelorMittal Monlevade steel plant (BF-EAF)	Brazil	ArcelorMittal SA [100%]	1			1200			1000	integrated (BF-EAF)	BF, EAF	construction					0	0	0	0	0	0	638.378	638.378	638.378	638.378	638.378	638.378	638.378	638.378	638.378	638.378	638.378	638.378	638.378	638.378	638.378	638.378	638.378	638.378	638.378	638.378	638.378	638.378	638.378
ArcelorMittal S.A.	SBR00008			ArcelorMittal Pecém steel plant	Brazil	ArcelorMittal SA [100%]	1	3000	3000	3192		N/A	N/A	integrated (BF)	BF, BOF	operating					0	0	0	1713.69	1915.14	1915.14	1915.14	1915.14	1915.14	1915.14	1915.14	1915.14	1915.14	1915.14	1915.14	1915.14	1915.14	1915.14	1915.14	1915.14	1915.14	1915.14	1915.14	1915.14	1915.14	1915.14	1915.14	1915.14	1915.14
ArcelorMittal S.A.	SBR00009			ArcelorMittal Piracicaba steel plant	Brazil	ArcelorMittal SA [100%]	1	1100	1100	N/A		N/A	1100	electric	EAF	operating					772.108	745.488	662.916	628.353	702.216	702.216	702.216	702.216	702.216	702.216	702.216	702.216	702.216	702.216	702.216	702.216	702.216	702.216	702.216	702.216	702.216	702.216	702.216	702.216	702.216	702.216	702.216	702.216	702.216
ArcelorMittal S.A.	SBR00004			ArcelorMittal Resende steel plant	Brazil	ArcelorMittal SA [100%]	1	1000	1000	N/A		N/A	1000	electric	EAF	operating					701.916	677.716	602.651	571.23	638.378	638.378	638.378	638.378	638.378	638.378	638.378	638.378	638.378	638.378	638.378	638.378	638.378	638.378	638.378	638.378	638.378	638.378	638.378	638.378	638.378	638.378	638.378	638.378	638.378
ArcelorMittal S.A.	SBR00002			ArcelorMittal Tubarão steel plant	Brazil	ArcelorMittal SA [100%]	1	7500	7500	7280		N/A	N/A	integrated (BF)	BF, BOF	operating					5264.37	5082.87	4519.88	4284.23	4787.84	4787.84	4787.84	4787.84	4787.84	4787.84	4787.84	4787.84	4787.84	4787.84	4787.84	4787.84	4787.84	4787.84	4787.84	4787.84	4787.84	4787.84	4787.84	4787.84	4787.84	4787.84	4787.84	4787.84	4787.84
ArcelorMittal S.A.	SCA00002			ArcelorMittal Dofasco steel plant	Canada	ArcelorMittal SA [100%]	1	4050	4050	3024		N/A	1350	integrated (BF)	BF, BOF, EAF	operating					2842.76	2744.75	2440.73	2313.48	2585.43	2585.43	2585.43	2585.43	2585.43	2585.43	2585.43	2585.43	2585.43	2585.43	2585.43	2585.43	2585.43	2585.43	2585.43	2585.43	2585.43	2585.43	2585.43	2585.43	2585.43	2585.43	2585.43	2585.43	2585.43
ArcelorMittal S.A.	SCA00002			Dummy - ArcelorMittal Dofasco steel plant transition (DRI-EAF addition)	Canada	ArcelorMittal SA [100%]	1	2400	2400	N/A		2649	2400	integrated (DRI)	DRI, EAF	announced					0	0	0	0	0	0	0	0	0	0	0	0	0	0	0	0	0	0	0	0	0	0	0	0	0	0	0	0	0
ArcelorMittal S.A.	SCA00001			ArcelorMittal Montreal steel plant	Canada	ArcelorMittal SA [100%]	1	2400	2400	N/A		1000	2400	integrated (DRI)	DRI, EAF	operating					1684.6	1626.52	1446.36	1370.95	1532.11	1532.11	1532.11	1532.11	1532.11	1532.11	1532.11	1532.11	1532.11	1532.11	1532.11	1532.11	1532.11	1532.11	1532.11	1532.11	1532.11	1532.11	1532.11	1532.11	1532.11	1532.11	1532.11	1532.11	1532.11
ArcelorMittal S.A.	SFR00001			ArcelorMittal Dunkerque steel plant	France	ArcelorMittal SA [100%]	1	6750	6750	6900		N/A	N/A	integrated (BF)	BF, BOF	operating					4737.93	4574.59	4067.89	3855.81	4309.05	4309.05	4309.05	4309.05	4309.05	4309.05	4309.05	4309.05	4309.05	4309.05	4309.05	4309.05	4309.05	4309.05	4309.05	4309.05	4309.05	4309.05	4309.05	4309.05	4309.05	4309.05	4309.05	4309.05	4309.05
ArcelorMittal S.A.	SFR00001-1			Dummy - ArcelorMittal Dunkerque steel plant transition (DRI and EAF addition)	France	ArcelorMittal SA [100%]	1	4500	4500	N/A		2500	4500	integrated (DRI)	DRI, EAF	announced					0	0	0	0	0	0	0	0	0	0	0	0	0	0	0	0	0	0	0	0	0	0	0	0	0	0	0	0	0
ArcelorMittal S.A.	SFR00002			ArcelorMittal Méditerranée Fos sur Mer steel plant	France	ArcelorMittal SA [100%]	1	4000	4000	4000		N/A	N/A	integrated (BF)	BF, BOF	operating					2807.66	2710.87	2410.6	2284.92	2553.51	2553.51	2553.51	2553.51	2553.51	2553.51	2553.51	2553.51	2553.51	2553.51	2553.51	2553.51	2553.51	2553.51	2553.51	2553.51	2553.51	2553.51	2553.51	2553.51	2553.51	2553.51	2553.51	2553.51	2553.51
ArcelorMittal S.A.	SFR00002-1			Dummy - ArcelorMittal Méditerranée Fos sur Mer steel plant transition (EAF addition)	France	ArcelorMittal SA [100%]	1	2000	2000	N/A		N/A	2000	electric	EAF	announced					0	0	0	0	0	0	0	0	0	0	0	0	0	0	0	0	0	0	0	0	0	0	0	0	0	0	0	0	0
ArcelorMittal S.A.	SDE00003			AG der Dillinger Hüttenwerke Dillingen steel plant	Germany	SHS Stahl Holding Saar GmbH & Co KgaA [57.2%]; ArcelorMittal SA [33.4%]; Saarstahl AG [9.4%]	0.334	2760	921.84	4790		N/A	N/A	integrated (BF)	BF, BOF	operating					647.054	624.746	555.547	526.583	588.483	588.483	588.483	588.483	588.483	588.483	588.483	588.483	588.483	588.483	588.483	588.483	588.483	588.483	588.483	588.483	588.483	588.483	588.483	588.483	588.483	588.483	588.483	588.483	588.483
ArcelorMittal S.A.	SDE00003-1			Dummy - AG der Dillinger Hüttenwerke Dillingen steel plant transition (DRI-EAF addition)	Germany	SHS Stahl Holding Saar GmbH & Co KgaA [57.2%]; ArcelorMittal SA [33.4%]; Saarstahl AG [9.4%]	0.334	1750	584.5	N/A		2500	1750	integrated (DRI)	DRI, EAF	announced					0	0	0	0	0	0	0	0	0	0	0	0	0	0	0	0	0	0	0	0	0	0	0	0	0	0	0	0	0
ArcelorMittal S.A.	SDE00006			ArcelorMittal Bremen steel plant	Germany	ArcelorMittal SA [100%]	1	3800	3800	3800		N/A	N/A	integrated (BF)	BF, BOF	operating					2667.28	2575.32	2290.07	2170.68	2425.84	2425.84	2425.84	2425.84	2425.84	2425.84	2425.84	2425.84	2425.84	2425.84	2425.84	2425.84	2425.84	2425.84	2425.84	2425.84	2425.84	2425.84	2425.84	2425.84	2425.84	2425.84	2425.84	2425.84	2425.84
ArcelorMittal S.A.	SDE00006-1			Dummy - ArcelorMittal Bremen steel plant transition (DRI-EAF addition)	Germany	ArcelorMittal SA [100%]	1	1750	1750	N/A		2000	1750	integrated (DRI)	DRI, EAF	announced					0	0	0	0	0	0	0	0	0	0	0	0	0	0	0	0	0	0	0	0	0	0	0	0	0	0	0	0	0
ArcelorMittal S.A.	SDE00008			ArcelorMittal Duisburg steel plant	Germany	ArcelorMittal SA [100%]	1	1300	1300	N/A		N/A	N/A	oxygen	BOF	operating					912.491	881.031	783.446	742.6	829.892	829.892	829.892	829.892	829.892	829.892	829.892	829.892	829.892	829.892	829.892	829.892	829.892	829.892	829.892	829.892	829.892	829.892	829.892	829.892	829.892	829.892	829.892	829.892	829.892
ArcelorMittal S.A.	SDE00008-1			Dummy - ArcelorMittal Duisburg steel plant transition (EAF addition)	Germany	ArcelorMittal SA [100%]	1	1300	1300	N/A		N/A	1300	electric	EAF	announced					0	0	0	0	0	0	0	0	0	0	0	0	0	0	0	0	0	0	0	0	0	0	0	0	0	0	0	0	0
ArcelorMittal S.A.	SDE00005			ArcelorMittal Eisenhüttenstadt steel plant	Germany	ArcelorMittal SA [100%]	1	2400	2400	1825		N/A	N/A	integrated (BF)	BF, BOF	operating					1684.6	1626.52	1446.36	1370.95	1532.11	1532.11	1532.11	1532.11	1532.11	1532.11	1532.11	1532.11	1532.11	1532.11	1532.11	1532.11	1532.11	1532.11	1532.11	1532.11	1532.11	1532.11	1532.11	1532.11	1532.11	1532.11	1532.11	1532.11	1532.11
ArcelorMittal S.A.	SDE00005-1			Dummy - ArcelorMittal Eisenhüttenstadt steel plant transition (DRI-EAF addition)	Germany	ArcelorMittal SA [100%]	1	1750	1750	N/A		>0	1750	integrated (DRI)	DRI, EAF	announced					0	0	0	0	0	0	0	0	0	0	0	0	0	0	0	0	0	0	0	0	0	0	0	0	0	0	0	0	0
ArcelorMittal S.A.	SDE00007			ArcelorMittal Hamburg steel plant	Germany	ArcelorMittal SA [100%]	1	1100	1100	N/A		600	1100	integrated (DRI)	DRI, EAF	operating					421.15	406.63	361.59	342.738	383.027	383.027	383.027	383.027	383.027	383.027	383.027	383.027	383.027	383.027	383.027	383.027	383.027	383.027	383.027	383.027	383.027	383.027	383.027	383.027	383.027	383.027	383.027	383.027	383.027
ArcelorMittal S.A.	SDE00007			ArcelorMittal Hamburg steel plant (scrap-EAF)	Germany	ArcelorMittal SA [100%]	1						1100	electric	EAF	operating					350.958	338.858	301.325	285.615	319.189	319.189	319.189	319.189	319.189	319.189	319.189	319.189	319.189	319.189	319.189	319.189	319.189	319.189	319.189	319.189	319.189	319.189	319.189	319.189	319.189	319.189	319.189	319.189	319.189
ArcelorMittal S.A.	SIN00066			ArcelorMittal Nippon Steel Kendrapara plant	India	ArcelorMittal SA [60%]; Nippon Steel Corp [40%]	0.6	14000	8400	unknown		unknown	N/A	oxygen	BOF	announced					0	0	0	0	0	0	0	0	5362.38	5362.38	5362.38	5362.38	5362.38	5362.38	5362.38	5362.38	5362.38	5362.38	5362.38	5362.38	5362.38	5362.38	5362.38	5362.38	5362.38	5362.38	5362.38	5362.38	5362.38
ArcelorMittal S.A.	SIN00004			ArcelorMittal Nippon Steel India Hazira Plant	India	ArcelorMittal SA [60%]; Nippon Steel Corp [40%]	0.6	9600	5760	2040		7830	9600	integrated (BF-EAF)	BF, DRI, EAF	operating					859.145	829.525	737.644	699.186	781.375	781.375	781.375	781.375	781.375	781.375	781.375	781.375	781.375	781.375	781.375	781.375	781.375	781.375	781.375	781.375	781.375	781.375	781.375	781.375	781.375	781.375	781.375	781.375	781.375
ArcelorMittal S.A.	SIN00004			ArcelorMittal Nippon Steel India Hazira Plant	India	ArcelorMittal SA [60%]; Nippon Steel Corp [40%]	0.6					7830		integrated (DRI)	DRI, EAF	operating					3297.6	3183.91	2831.25	2683.64	2999.1	2999.1	2999.1	2999.1	2999.1	2999.1	2999.1	2999.1	2999.1	2999.1	2999.1	2999.1	2999.1	2999.1	2999.1	2999.1	2999.1	2999.1	2999.1	2999.1	2999.1	2999.1	2999.1	2999.1	2999.1
ArcelorMittal S.A.	SIN00004			ArcelorMittal Nippon Steel India Hazira Plant	India	ArcelorMittal SA [60%]; Nippon Steel Corp [40%]	0.6				6000			integrated (BF)	BF, BOF	construction					0	0	0	0	0	2681.19	2681.19	2681.19	2681.19	5898.62	5898.62	5898.62	5898.62	5898.62	5898.62	5898.62	5898.62	5898.62	5898.62	5898.62	5898.62	5898.62	5898.62	5898.62	5898.62	5898.62	5898.62	5898.62	5898.62
ArcelorMittal S.A.				ArcelorMittal Nippon Steel Paradip Steel Plant	India	ArcelorMittal SA [60%]; Nippon Steel Corp [40%]	0.6	7000	4200					integrated (BF)	BF, BOF	announced					0	0	0	0	0	0	0	0	0	2681.19	2681.19	2681.19	2681.19	2681.19	2681.19	2681.19	2681.19	2681.19	2681.19	2681.19	2681.19	2681.19	2681.19	2681.19	2681.19	2681.19	2681.19	2681.19	2681.19
ArcelorMittal S.A.	SIT00003			ArcelorMittal Acciaierie d'Italia Taranto steel plant	Italy	ArcelorMittal SA [40%]; Acciaierie d'italia SpA [60%]	0.4	11500	4600	9500		N/A	N/A	integrated (BF)	BF, BOF	operating					3228.81	3117.5	2772.19	2627.66	0	0	0	0	0	0	0	0	0	0	0	0	0	0	0	0	0	0	0	0	0	0	0	0	0
ArcelorMittal S.A.	SKZ00001			ArcelorMittal Temirtau steel plant	Kazakhstan	ArcelorMittal SA [100%]	1	6000	6000	5125		N/A	N/A	integrated (BF)	BF, BOF	operating					4211.5	4066.3	3615.9	3427.38	3830.27	3830.27	3830.27	3830.27	3830.27	3830.27	3830.27	3830.27	3830.27	3830.27	3830.27	3830.27	3830.27	3830.27	3830.27	3830.27	3830.27	3830.27	3830.27	3830.27	3830.27	3830.27	3830.27	3830.27	3830.27
ArcelorMittal S.A.	SLU00001			ArcelorMittal Differdange steel plant	Luxembourg	ArcelorMittal SA [100%]	1	2000	2000	N/A		N/A	2000	electric	EAF	operating					1403.83	1355.43	1205.3	1142.46	1276.76	1276.76	1276.76	1276.76	1276.76	1276.76	1276.76	1276.76	1276.76	1276.76	1276.76	1276.76	1276.76	1276.76	1276.76	1276.76	1276.76	1276.76	1276.76	1276.76	1276.76	1276.76	1276.76	1276.76	1276.76
ArcelorMittal S.A.	SLU00002			ArcelorMittal Esch-Belval steel plant	Luxembourg	ArcelorMittal SA [100%]	1	1000	1000	N/A		N/A	1000	electric	EAF	operating					701.916	677.716	602.651	571.23	638.378	797.973	797.973	797.973	797.973	797.973	797.973	797.973	797.973	797.973	797.973	797.973	797.973	797.973	797.973	797.973	797.973	797.973	797.973	797.973	797.973	797.973	797.973	797.973	797.973
ArcelorMittal S.A.	SMX00002			ArcelorMittal Lázaro Cárdenas steel plant	Mexico	ArcelorMittal SA [100%]	1	6400	6400	1451.91	2400	3200	4000	integrated (BF)	BF, BOF	operating					1684.6	1626.52	1446.36	1370.95	1532.11	1532.11	1532.11	1532.11	1532.11	1532.11	1532.11	1532.11	1532.11	1532.11	1532.11	1532.11	1532.11	1532.11	1532.11	1532.11	1532.11	1532.11	1532.11	1532.11	1532.11	1532.11	1532.11	1532.11	1532.11
ArcelorMittal S.A.	SMX00002			ArcelorMittal Lázaro Cárdenas steel plant (DRI-EAF)	Mexico	ArcelorMittal SA [100%]	1					3200	4000	integrated (DRI)	DRI, EAF	operating					2807.66	2710.87	2410.6	2284.92	2553.51	2553.51	2553.51	2553.51	2553.51	2553.51	2553.51	2553.51	2553.51	2553.51	2553.51	2553.51	2553.51	2553.51	2553.51	2553.51	2553.51	2553.51	2553.51	2553.51	2553.51	2553.51	2553.51	2553.51	2553.51
ArcelorMittal S.A.	SMA00002			ArcelorMittal Sonasid Casablanca steel plant	Morocco	ArcelorMittal SA [100%]	1	800	800	N/A		N/A	800	electric	EAF	operating					561.533	542.173	482.12	456.984	510.703	510.703	510.703	510.703	510.703	510.703	510.703	510.703	510.703	510.703	510.703	510.703	510.703	510.703	510.703	510.703	510.703	510.703	510.703	510.703	510.703	510.703	510.703	510.703	510.703
ArcelorMittal S.A.	SPL00001			ArcelorMittal Dąbrowa Górnicza steel plant	Poland	ArcelorMittal SA [100%]	1	5000	5000	4500		N/A	N/A	integrated (BF)	BF, BOF	operating					3509.58	3388.58	3013.25	2856.15	3191.89	3191.89	3191.89	3191.89	3191.89	3191.89	3191.89	3191.89	3191.89	3191.89	3191.89	3191.89	3191.89	3191.89	3191.89	3191.89	3191.89	3191.89	3191.89	3191.89	3191.89	3191.89	3191.89	3191.89	3191.89
ArcelorMittal S.A.	SPL00006			ArcelorMittal Warszawa steel plant	Poland	ArcelorMittal SA [100%]	1	750	750	N/A		N/A	750	electric	EAF	operating					526.437	508.287	451.988	428.423	478.784	478.784	478.784	478.784	478.784	478.784	478.784	478.784	478.784	478.784	478.784	478.784	478.784	478.784	478.784	478.784	478.784	478.784	478.784	478.784	478.784	478.784	478.784	478.784	478.784
ArcelorMittal S.A.	SRO00002			ArcelorMittal Hunedoara steel plant	Romania	ArcelorMittal Hunedoara SA [100%]	1	800	800	N/A		N/A	800	electric	EAF	operating					561.533	542.173	482.12	456.984	510.703	510.703	510.703	510.703	510.703	510.703	510.703	510.703	510.703	510.703	510.703	510.703	510.703	510.703	510.703	510.703	510.703	510.703	510.703	510.703	510.703	510.703	510.703	510.703	510.703
ArcelorMittal S.A.	SZA00001			ArcelorMittal Newcastle Steel Works	South Africa	Arcelormittal South Africa Ltd [100%]	0.6922	1900	1900	2044		N/A	N/A	integrated (BF)	BF, BOF	operating					923.146	891.319	792.594	751.271	0	0	0	0	0	0	0	0	0	0	0	0	0	0	0	0	0	0	0	0	0	0	0	0	0
ArcelorMittal S.A.	SZA00004			ArcelorMittal Saldanha Steel Works	South Africa	Arcelormittal South Africa Ltd [100%]	0.6922	1200	1200	760		800	1200	ironmaking (DRI)	BF, DRI, EAF	mothballed					0	0	0	0	0	0	0	0	0	0	0	0	0	0	0	0	0	0	0	0	0	0	0	0	0	0	0	0	0
ArcelorMittal S.A.	SZA00002			ArcelorMittal Vanderbijlpark Steel Works	South Africa	Arcelormittal South Africa Ltd [100%]	0.6922	4500	4500	3200		950	N/A	integrated (BF)	BF, BOF, DRI	operating					1651.95	1594.99	1418.33	1344.38	1502.41	1502.41	1502.41	1502.41	1502.41	1502.41	1502.41	1502.41	1502.41	1502.41	1502.41	1502.41	1502.41	1502.41	1502.41	1502.41	1502.41	1502.41	1502.41	1502.41	1502.41	1502.41	1502.41	1502.41	1502.41
ArcelorMittal S.A.	SZA00002			Dummy - ArcelorMittal Vanderbijlpark Steel Works transition (EAF addition)	South Africa	Arcelormittal South Africa Ltd [100%]	0.6922	1700	1176.74		N/A		1700	electric	EAF	announced					0	0	0	0	0	0	0	0	0	0	0	0	0	0	0	0	0	0	0	0	0	0	0	0	0	0	0	0	0
ArcelorMittal S.A.	SES00001			ArcelorMittal Asturias (Gijón) steel plant	Spain	ArcelorMittal SA [100%]	1	1200	1200	4200		N/A	N/A	integrated (BF)	BF, BOF	operating					842.299	813.26	723.181	685.477	766.054	766.054	766.054	766.054	766.054	766.054	766.054	766.054	766.054	766.054	766.054	766.054	766.054	766.054	766.054	766.054	766.054	766.054	766.054	766.054	766.054	766.054	766.054	766.054	766.054
ArcelorMittal S.A.	SES00001			Dummy - ArcelorMittal Asturias (Gijón) steel plant EAF expansion	Spain	ArcelorMittal SA [100%]	1							electric	EAF	construction					0	0	0	0	0	0	702.216	702.216	702.216	702.216	702.216	702.216	702.216	702.216	702.216	702.216	702.216	702.216	702.216	702.216	702.216	702.216	702.216	702.216	702.216	702.216	702.216	702.216	702.216
ArcelorMittal S.A.	SES00001			Dummy - ArcelorMittal Asturias (Gijón) steel plant DRI expansion	Spain	ArcelorMittal SA [100%]	1							integrated (DRI)	DRI, EAF	announced					0	0	0	0	0	0	0	0	0	0	0	0	0	0	0	0	0	0	0	0	0	0	0	0	0	0	0	0	0
ArcelorMittal S.A.	SES00007			ArcelorMittal Olaberria-Bergara (Olaberria) steel plant	Spain	ArcelorMittal SA [100%]	1	1450	1450	N/A		N/A	1450	electric	EAF	operating					1017.78	982.689	873.843	828.284	925.649	925.649	925.649	925.649	925.649	925.649	925.649	925.649	925.649	925.649	925.649	925.649	925.649	925.649	925.649	925.649	925.649	925.649	925.649	925.649	925.649	925.649	925.649	925.649	925.649
ArcelorMittal S.A.	SES00008			ArcelorMittal Asturias (Avilés) steel plant	Spain	ArcelorMittal SA [100%]	1	4200	4200	N/A		N/A	N/A	oxygen	BOF	operating					2948.05	2846.41	2531.13	2399.17	2681.19	2681.19	2681.19	2681.19	2681.19	2681.19	2681.19	2681.19	2681.19	2681.19	2681.19	2681.19	2681.19	2681.19	2681.19	2681.19	2681.19	2681.19	2681.19	2681.19	2681.19	2681.19	2681.19	2681.19	2681.19
ArcelorMittal S.A.	SES00002			ArcelorMittal Sestao steel plant	Spain	ArcelorMittal SA [100%]	1	2000	2000	N/A		N/A	2000	electric	EAF	operating					1403.83	1355.43	1205.3	1142.46	1276.76	1276.76	1276.76	1276.76	1276.76	1276.76	1276.76	1276.76	1276.76	1276.76	1276.76	1276.76	1276.76	1276.76	1276.76	1276.76	1276.76	1276.76	1276.76	1276.76	1276.76	1276.76	1276.76	1276.76	1276.76
ArcelorMittal S.A.	SUA00002			ArcelorMittal Kryvyi Rih steel plant	Ukraine	ArcelorMittal SA [100%]	1	8000	8000	11450		N/A	N/A	integrated (BF)	BF, BOF, OHF	operating					5615.33	5421.73	1446.36	1370.95	1532.11	1532.11	1532.11	1532.11	1532.11	1532.11	1532.11	1532.11	1532.11	1532.11	1532.11	1532.11	1532.11	1532.11	1532.11	1532.11	1532.11	1532.11	1532.11	1532.11	1532.11	1532.11	1532.11	1532.11	1532.11
ArcelorMittal S.A.	SUS00081			AM/NS Calvert LLC	United States	ArcelorMittal SA [50%]; Nippon Steel Corp [50%]	0.5	1500	750	N/A		N/A	1500	electric	EAF	operating					0	0	0	428.423	478.784	478.784	478.784	478.784	478.784	478.784	478.784	478.784	478.784	478.784	478.784	478.784	478.784	478.784	478.784	478.784	478.784	478.784	478.784	478.784	478.784	478.784	478.784	478.784	478.784
ArcelorMittal S.A.	SUS00053			ArcelorMittal Texas DRI plant	United States	ArcelorMittal SA [80%]; voestalpine AG [20%]	0.8	N/A	1600	N/A		2000	N/A	ironmaking (DRI)	DRI	operating					0	0	964.241	913.969	1021.41	1021.41	1021.41	1021.41	1021.41	1021.41	1021.41	1021.41	1021.41	1021.41	1021.41	1021.41	1021.41	1021.41	1021.41	1021.41	1021.41	1021.41	1021.41	1021.41	1021.41	1021.41	1021.41	1021.41	1021.41
Total crude steel output																					71527	69061	59001	58067	61116.6	63957.4	65298	65298	70660.4	76559	76559	76559	76559	76559	76559	76559	76559	76559	76559	76559	76559	76559	76559	76559	76559	76559	76559	76559	76559
Reported crude steel output																					71527	69061	59001	58067
CO2 emissions trajectory (mt CO2)
ArcelorMittal S.A.	SAR00001			ArcelorMittal Acindar Villa Constitución steel plant	Argentina	ArcelorMittal SA [100%]	1	1750	1750	N/A		600	1750	integrated (DRI)	DRI, EAF	operating					1.28977	1.2453	1.10737	1.04964	1.17302	1.17302	1.17302	1.17302	1.17302	1.17302	1.17302	1.17302	1.17302	1.17302	1.17302	1.17302	1.17302	1.17302	1.17302	1.17302	1.17302	1.17302	1.17302	1.17302	1.17302	1.17302	1.17302	1.17302	1.17302
ArcelorMittal S.A.	SBE00001			ArcelorMittal Gent steel plant	Belgium	ArcelorMittal SA [100%]	1	5000	5000	5000		N/A	N/A	integrated (BF)	BF, BOF	operating					6.21196	5.99779	5.33346	5.05539	5.64965	5.64965	5.64965	5.64965	5.64965	5.64965	5.64965	5.64965	5.64965	5.64965	5.64965	5.64965	5.64965	5.64965	5.64965	5.64965	5.64965	5.64965	5.64965	5.64965	5.64965	5.64965	5.64965	5.64965	5.64965
ArcelorMittal S.A.	SBE00001-1			Dummy - ArcelorMittal Gent steel plant (DRI-EAF addition)	Belgium	ArcelorMittal SA [100%]	1	2500	2500	N/A		2500	2500	integrated (DRI)	DRI, EAF	announced					0	0	0	0	0	0	0	0	0	0	0	0	0	0	0	0	0	0	0	0	0	0	0	0	0	0	0	0	0
ArcelorMittal S.A.	SBA00001			ArcelorMittal Zenica steel plant	Bosnia and Herzegovina	ArcelorMittal SA [100%]	1	1940	1940	1100	1140	N/A	800	integrated (BF)	BF, BOF, EAF	operating					1.41633	1.3675	1.21603	1.15263	1.28812	1.28812	1.28812	1.28812	1.28812	1.28812	1.28812	1.28812	1.28812	1.28812	1.28812	1.28812	1.28812	1.28812	1.28812	1.28812	1.28812	1.28812	1.28812	1.28812	1.28812	1.28812	1.28812	1.28812	1.28812
ArcelorMittal S.A.	SBA00001			ArcelorMittal Zenica steel plant (scrap-EAF)	Bosnia and Herzegovina	ArcelorMittal SA [100%]	1						800	electric	EAF	operating					0.0224613	0.0216869	0.0192848	0.0182794	0.0204281	0.0204281	0.0204281	0.0204281	0.0204281	0.0204281	0.0204281	0.0204281	0.0204281	0.0204281	0.0204281	0.0204281	0.0204281	0.0204281	0.0204281	0.0204281	0.0204281	0.0204281	0.0204281	0.0204281	0.0204281	0.0204281	0.0204281	0.0204281	0.0204281
ArcelorMittal S.A.	SBR00018			ArcelorMittal Barra Mansa steel plant	Brazil	ArcelorMittal SA [100%]	1	800	800	N/A		N/A	800	electric	EAF	operating					0.0280766	0.0271087	0.024106	0.0228492	0.0255351	0.0255351	0.0255351	0.0255351	0.0255351	0.0255351	0.0255351	0.0255351	0.0255351	0.0255351	0.0255351	0.0255351	0.0255351	0.0255351	0.0255351	0.0255351	0.0255351	0.0255351	0.0255351	0.0255351	0.0255351	0.0255351	0.0255351	0.0255351	0.0255351
ArcelorMittal S.A.	SBR00013			ArcelorMittal Juiz de Fora steel plant	Brazil	ArcelorMittal SA [100%]	1	1100	1100	360	N/A	N/A	1100	integrated (BF-EAF)	BF, EAF	operating					0.553391	0.534312	0.47513	0.450358	0.503298	0.503298	0.503298	0.503298	0.503298	0.503298	0.503298	0.503298	0.503298	0.503298	0.503298	0.503298	0.503298	0.503298	0.503298	0.503298	0.503298	0.503298	0.503298	0.503298	0.503298	0.503298	0.503298	0.503298	0.503298
ArcelorMittal S.A.	SBR00013			ArcelorMittal Juiz de Fora steel plant (scrap-EAF)	Brazil	ArcelorMittal SA [100%]	1						1100	electric	EAF	operating					0.0259709	0.0250755	0.0222981	0.0211355	0.02362	0.02362	0.02362	0.02362	0.02362	0.02362	0.02362	0.02362	0.02362	0.02362	0.02362	0.02362	0.02362	0.02362	0.02362	0.02362	0.02362	0.02362	0.02362	0.02362	0.02362	0.02362	0.02362	0.02362	0.02362
ArcelorMittal S.A.	SBR00003			ArcelorMittal Monlevade steel plant	Brazil	ArcelorMittal SA [100%]	1	1200	1200	1040		N/A	N/A	integrated (BF)	BF, BOF	operating					1.84464	1.78104	1.58377	1.50119	1.67766	1.67766	1.67766	1.67766	1.67766	1.67766	1.67766	1.67766	1.67766	1.67766	1.67766	1.67766	1.67766	1.67766	1.67766	1.67766	1.67766	1.67766	1.67766	1.67766	1.67766	1.67766	1.67766	1.67766	1.67766
ArcelorMittal S.A.	SBR00003			Dummy - ArcelorMittal Monlevade steel plant (BF-EAF)	Brazil	ArcelorMittal SA [100%]	1			1200			1000	integrated (BF-EAF)	BF, EAF	construction					0	0	0	0	0	0	1.39805	1.39805	1.39805	1.39805	1.39805	1.39805	1.39805	1.39805	1.39805	1.39805	1.39805	1.39805	1.39805	1.39805	1.39805	1.39805	1.39805	1.39805	1.39805	1.39805	1.39805	1.39805	1.39805
ArcelorMittal S.A.	SBR00008			ArcelorMittal Pecém steel plant	Brazil	ArcelorMittal SA [100%]	1	3000	3000	3192		N/A	N/A	integrated (BF)	BF, BOF	operating					0	0	0	3.75298	4.19415	4.19415	4.19415	4.19415	4.19415	4.19415	4.19415	4.19415	4.19415	4.19415	4.19415	4.19415	4.19415	4.19415	4.19415	4.19415	4.19415	4.19415	4.19415	4.19415	4.19415	4.19415	4.19415	4.19415	4.19415
ArcelorMittal S.A.	SBR00009			ArcelorMittal Piracicaba steel plant	Brazil	ArcelorMittal SA [100%]	1	1100	1100	N/A		N/A	1100	electric	EAF	operating					0.0386054	0.0372744	0.0331458	0.0314177	0.0351108	0.0351108	0.0351108	0.0351108	0.0351108	0.0351108	0.0351108	0.0351108	0.0351108	0.0351108	0.0351108	0.0351108	0.0351108	0.0351108	0.0351108	0.0351108	0.0351108	0.0351108	0.0351108	0.0351108	0.0351108	0.0351108	0.0351108	0.0351108	0.0351108
ArcelorMittal S.A.	SBR00004			ArcelorMittal Resende steel plant	Brazil	ArcelorMittal SA [100%]	1	1000	1000	N/A		N/A	1000	electric	EAF	operating					0.0350958	0.0338858	0.0301325	0.0285615	0.0319189	0.0319189	0.0319189	0.0319189	0.0319189	0.0319189	0.0319189	0.0319189	0.0319189	0.0319189	0.0319189	0.0319189	0.0319189	0.0319189	0.0319189	0.0319189	0.0319189	0.0319189	0.0319189	0.0319189	0.0319189	0.0319189	0.0319189	0.0319189	0.0319189
ArcelorMittal S.A.	SBR00002			ArcelorMittal Tubarão steel plant	Brazil	ArcelorMittal SA [100%]	1	7500	7500	7280		N/A	N/A	integrated (BF)	BF, BOF	operating					11.529	11.1315	9.89854	9.38246	10.4854	10.4854	10.4854	10.4854	10.4854	10.4854	10.4854	10.4854	10.4854	10.4854	10.4854	10.4854	10.4854	10.4854	10.4854	10.4854	10.4854	10.4854	10.4854	10.4854	10.4854	10.4854	10.4854	10.4854	10.4854
ArcelorMittal S.A.	SCA00002			ArcelorMittal Dofasco steel plant	Canada	ArcelorMittal SA [100%]	1	4050	4050	3024		N/A	1350	integrated (BF)	BF, BOF, EAF	operating					6.57693	6.35018	5.64681	5.35241	5.98158	5.98158	5.98158	5.98158	5.98158	5.98158	5.98158	5.98158	5.98158	5.98158	5.98158	5.98158	5.98158	5.98158	5.98158	5.98158	5.98158	5.98158	5.98158	5.98158	5.98158	5.98158	5.98158	5.98158	5.98158
ArcelorMittal S.A.	SCA00002			Dummy - ArcelorMittal Dofasco steel plant transition (DRI-EAF addition)	Canada	ArcelorMittal SA [100%]	1	2400	2400	N/A		2649	2400	integrated (DRI)	DRI, EAF	announced					0	0	0	0	0	0	0	0	0	0	0	0	0	0	0	0	0	0	0	0	0	0	0	0	0	0	0	0	0
ArcelorMittal S.A.	SCA00001			ArcelorMittal Montreal steel plant	Canada	ArcelorMittal SA [100%]	1	2400	2400	N/A		1000	2400	integrated (DRI)	DRI, EAF	operating					1.76883	1.70785	1.51868	1.4395	1.60871	1.60871	1.60871	1.60871	1.60871	1.60871	1.60871	1.60871	1.60871	1.60871	1.60871	1.60871	1.60871	1.60871	1.60871	1.60871	1.60871	1.60871	1.60871	1.60871	1.60871	1.60871	1.60871	1.60871	1.60871
ArcelorMittal S.A.	SFR00001			ArcelorMittal Dunkerque steel plant	France	ArcelorMittal SA [100%]	1	6750	6750	6900		N/A	N/A	integrated (BF)	BF, BOF	operating					8.38614	8.09702	7.20017	6.82478	7.62703	7.62703	7.62703	7.62703	7.62703	7.62703	7.62703	7.62703	7.62703	7.62703	7.62703	7.62703	7.62703	7.62703	7.62703	7.62703	7.62703	7.62703	7.62703	7.62703	7.62703	7.62703	7.62703	7.62703	7.62703
ArcelorMittal S.A.	SFR00001-1			Dummy - ArcelorMittal Dunkerque steel plant transition (DRI and EAF addition)	France	ArcelorMittal SA [100%]	1	4500	4500	N/A		2500	4500	integrated (DRI)	DRI, EAF	announced					0	0	0	0	0	0	0	0	0	0	0	0	0	0	0	0	0	0	0	0	0	0	0	0	0	0	0	0	0
ArcelorMittal S.A.	SFR00002			ArcelorMittal Méditerranée Fos sur Mer steel plant	France	ArcelorMittal SA [100%]	1	4000	4000	4000		N/A	N/A	integrated (BF)	BF, BOF	operating					4.96957	4.79823	4.26677	4.04431	4.51972	4.51972	4.51972	4.51972	4.51972	4.51972	4.51972	4.51972	4.51972	4.51972	4.51972	4.51972	4.51972	4.51972	4.51972	4.51972	4.51972	4.51972	4.51972	4.51972	4.51972	4.51972	4.51972	4.51972	4.51972
ArcelorMittal S.A.	SFR00002-1			Dummy - ArcelorMittal Méditerranée Fos sur Mer steel plant transition (EAF addition)	France	ArcelorMittal SA [100%]	1	2000	2000	N/A		N/A	2000	electric	EAF	announced					0	0	0	0	0	0	0	0	0	0	0	0	0	0	0	0	0	0	0	0	0	0	0	0	0	0	0	0	0
ArcelorMittal S.A.	SDE00003			AG der Dillinger Hüttenwerke Dillingen steel plant	Germany	SHS Stahl Holding Saar GmbH & Co KgaA [57.2%]; ArcelorMittal SA [33.4%]; Saarstahl AG [9.4%]	0.334	2760	921.84	4790		N/A	N/A	integrated (BF)	BF, BOF	operating					1.14529	1.1058	0.983319	0.932052	1.04161	1.04161	1.04161	1.04161	1.04161	1.04161	1.04161	1.04161	1.04161	1.04161	1.04161	1.04161	1.04161	1.04161	1.04161	1.04161	1.04161	1.04161	1.04161	1.04161	1.04161	1.04161	1.04161	1.04161	1.04161
ArcelorMittal S.A.	SDE00003-1			Dummy - AG der Dillinger Hüttenwerke Dillingen steel plant transition (DRI-EAF addition)	Germany	SHS Stahl Holding Saar GmbH & Co KgaA [57.2%]; ArcelorMittal SA [33.4%]; Saarstahl AG [9.4%]	0.334	1750	584.5	N/A		2500	1750	integrated (DRI)	DRI, EAF	announced					0	0	0	0	0	0	0	0	0	0	0	0	0	0	0	0	0	0	0	0	0	0	0	0	0	0	0	0	0
ArcelorMittal S.A.	SDE00006			ArcelorMittal Bremen steel plant	Germany	ArcelorMittal SA [100%]	1	3800	3800	3800		N/A	N/A	integrated (BF)	BF, BOF	operating					4.72109	4.55832	4.05343	3.8421	4.29373	4.29373	4.29373	4.29373	4.29373	4.29373	4.29373	4.29373	4.29373	4.29373	4.29373	4.29373	4.29373	4.29373	4.29373	4.29373	4.29373	4.29373	4.29373	4.29373	4.29373	4.29373	4.29373	4.29373	4.29373
ArcelorMittal S.A.	SDE00006-1			Dummy - ArcelorMittal Bremen steel plant transition (DRI-EAF addition)	Germany	ArcelorMittal SA [100%]	1	1750	1750	N/A		2000	1750	integrated (DRI)	DRI, EAF	announced					0	0	0	0	0	0	0	0	0	0	0	0	0	0	0	0	0	0	0	0	0	0	0	0	0	0	0	0	0
ArcelorMittal S.A.	SDE00008			ArcelorMittal Duisburg steel plant	Germany	ArcelorMittal SA [100%]	1	1300	1300	N/A		N/A	N/A	oxygen	BOF	operating					0.182498	0.176206	0.156689	0.14852	0.165978	0.165978	0.165978	0.165978	0.165978	0.165978	0.165978	0.165978	0.165978	0.165978	0.165978	0.165978	0.165978	0.165978	0.165978	0.165978	0.165978	0.165978	0.165978	0.165978	0.165978	0.165978	0.165978	0.165978	0.165978
ArcelorMittal S.A.	SDE00008-1			Dummy - ArcelorMittal Duisburg steel plant transition (EAF addition)	Germany	ArcelorMittal SA [100%]	1	1300	1300	N/A		N/A	1300	electric	EAF	announced					0	0	0	0	0	0	0	0	0	0	0	0	0	0	0	0	0	0	0	0	0	0	0	0	0	0	0	0	0
ArcelorMittal S.A.	SDE00005			ArcelorMittal Eisenhüttenstadt steel plant	Germany	ArcelorMittal SA [100%]	1	2400	2400	1825		N/A	N/A	integrated (BF)	BF, BOF	operating					2.98174	2.87894	2.56006	2.42659	2.71183	2.71183	2.71183	2.71183	2.71183	2.71183	2.71183	2.71183	2.71183	2.71183	2.71183	2.71183	2.71183	2.71183	2.71183	2.71183	2.71183	2.71183	2.71183	2.71183	2.71183	2.71183	2.71183	2.71183	2.71183
ArcelorMittal S.A.	SDE00005-1			Dummy - ArcelorMittal Eisenhüttenstadt steel plant transition (DRI-EAF addition)	Germany	ArcelorMittal SA [100%]	1	1750	1750	N/A		>0	1750	integrated (DRI)	DRI, EAF	announced					0	0	0	0	0	0	0	0	0	0	0	0	0	0	0	0	0	0	0	0	0	0	0	0	0	0	0	0	0
ArcelorMittal S.A.	SDE00007			ArcelorMittal Hamburg steel plant	Germany	ArcelorMittal SA [100%]	1	1100	1100	N/A		600	1100	integrated (DRI)	DRI, EAF	operating					0.442207	0.426961	0.37967	0.359875	0.402178	0.402178	0.402178	0.402178	0.402178	0.402178	0.402178	0.402178	0.402178	0.402178	0.402178	0.402178	0.402178	0.402178	0.402178	0.402178	0.402178	0.402178	0.402178	0.402178	0.402178	0.402178	0.402178	0.402178	0.402178
ArcelorMittal S.A.	SDE00007			ArcelorMittal Hamburg steel plant (scrap-EAF)	Germany	ArcelorMittal SA [100%]	1						1100	electric	EAF	operating					0.0140383	0.0135543	0.012053	0.0114246	0.0127676	0.0127676	0.0127676	0.0127676	0.0127676	0.0127676	0.0127676	0.0127676	0.0127676	0.0127676	0.0127676	0.0127676	0.0127676	0.0127676	0.0127676	0.0127676	0.0127676	0.0127676	0.0127676	0.0127676	0.0127676	0.0127676	0.0127676	0.0127676	0.0127676
ArcelorMittal S.A.	SIN00066			ArcelorMittal Nippon Steel Kendrapara plant	India	ArcelorMittal SA [60%]; Nippon Steel Corp [40%]	0.6	14000	8400	unknown		unknown	N/A	integrated (BF)	BOF	announced					0	0	0	0	0	0	0	0	19.948	19.948	19.948	19.948	19.948	19.948	19.948	19.948	19.948	19.948	19.948	19.948	19.948	19.948	19.948	19.948	19.948	19.948	19.948	19.948	19.948
ArcelorMittal S.A.	SIN00004			ArcelorMittal Nippon Steel India Hazira Plant	India	ArcelorMittal SA [60%]; Nippon Steel Corp [40%]	0.6	9600	5760	2040		7830	9600	integrated (BF-EAF)	BF, DRI, EAF	operating					3.19602	3.08583	2.74404	2.60097	2.90672	2.90672	2.90672	2.90672	2.90672	2.90672	2.90672	2.90672	2.90672	2.90672	2.90672	2.90672	2.90672	2.90672	2.90672	2.90672	2.90672	2.90672	2.90672	2.90672	2.90672	2.90672	2.90672	2.90672	2.90672
ArcelorMittal S.A.	SIN00004			ArcelorMittal Nippon Steel India Hazira Plant	India	ArcelorMittal SA [60%]; Nippon Steel Corp [40%]	0.6					7830		integrated (DRI)	DRI, EAF	operating					3.46248	3.34311	2.97282	2.81782	3.14906	3.14906	3.14906	3.14906	3.14906	3.14906	3.14906	3.14906	3.14906	3.14906	3.14906	3.14906	3.14906	3.14906	3.14906	3.14906	3.14906	3.14906	3.14906	3.14906	3.14906	3.14906	3.14906	3.14906	3.14906
ArcelorMittal S.A.	SIN00004			ArcelorMittal Nippon Steel India Hazira Plant	India	ArcelorMittal SA [60%]; Nippon Steel Corp [40%]	0.6				6000			integrated (BF)	BF, BOF	construction					0	0	0	0	0	9.97402	9.97402	9.97402	9.97402	21.9429	21.9429	21.9429	21.9429	21.9429	21.9429	21.9429	21.9429	21.9429	21.9429	21.9429	21.9429	21.9429	21.9429	21.9429	21.9429	21.9429	21.9429	21.9429	21.9429
ArcelorMittal S.A.				ArcelorMittal Nippon Steel Paradip Steel Plant	India	ArcelorMittal SA [60%]; Nippon Steel Corp [40%]	0.6	7000	4200					integrated (BF)	BF, BOF	announced					0	0	0	0	0	0	0	0	0	9.97402	9.97402	9.97402	9.97402	9.97402	9.97402	9.97402	9.97402	9.97402	9.97402	9.97402	9.97402	9.97402	9.97402	9.97402	9.97402	9.97402	9.97402	9.97402	9.97402
ArcelorMittal S.A.	SIT00003			ArcelorMittal Acciaierie d'Italia Taranto steel plant	Italy	ArcelorMittal SA [40%]; Acciaierie d'italia SpA [60%]	0.4	11500	4600	9500		N/A	N/A	integrated (BF)	BF, BOF	operating					5.715	5.51797	4.90678	4.65096	0	0	0	0	0	0	0	0	0	0	0	0	0	0	0	0	0	0	0	0	0	0	0	0	0
ArcelorMittal S.A.	SKZ00001			ArcelorMittal Temirtau steel plant	Kazakhstan	ArcelorMittal SA [100%]	1	6000	6000	5125		N/A	N/A	integrated (BF)	BF, BOF	operating					9.7436	9.40767	8.36565	7.92949	8.8616	8.8616	8.8616	8.8616	8.8616	8.8616	8.8616	8.8616	8.8616	8.8616	8.8616	8.8616	8.8616	8.8616	8.8616	8.8616	8.8616	8.8616	8.8616	8.8616	8.8616	8.8616	8.8616	8.8616	8.8616
ArcelorMittal S.A.	SLU00001			ArcelorMittal Differdange steel plant	Luxembourg	ArcelorMittal SA [100%]	1	2000	2000	N/A		N/A	2000	electric	EAF	operating					0.0561533	0.0542173	0.048212	0.0456984	0.0510703	0.0510703	0.0510703	0.0510703	0.0510703	0.0510703	0.0510703	0.0510703	0.0510703	0.0510703	0.0510703	0.0510703	0.0510703	0.0510703	0.0510703	0.0510703	0.0510703	0.0510703	0.0510703	0.0510703	0.0510703	0.0510703	0.0510703	0.0510703	0.0510703
ArcelorMittal S.A.	SLU00002			ArcelorMittal Esch-Belval steel plant	Luxembourg	ArcelorMittal SA [100%]	1	1000	1000	N/A		N/A	1000	electric	EAF	operating					0.0280766	0.0271087	0.024106	0.0228492	0.0255351	0.0319189	0.0319189	0.0319189	0.0319189	0.0319189	0.0319189	0.0319189	0.0319189	0.0319189	0.0319189	0.0319189	0.0319189	0.0319189	0.0319189	0.0319189	0.0319189	0.0319189	0.0319189	0.0319189	0.0319189	0.0319189	0.0319189	0.0319189	0.0319189
ArcelorMittal S.A.	SMX00002			ArcelorMittal Lázaro Cárdenas steel plant	Mexico	ArcelorMittal SA [100%]	1	6400	6400	1451.91	2400	3200	4000	integrated (BF)	BF, BOF	operating					3.89744	3.76307	3.34626	3.1718	3.54464	3.54464	3.54464	3.54464	3.54464	3.54464	3.54464	3.54464	3.54464	3.54464	3.54464	3.54464	3.54464	3.54464	3.54464	3.54464	3.54464	3.54464	3.54464	3.54464	3.54464	3.54464	3.54464	3.54464	3.54464
ArcelorMittal S.A.	SMX00002			ArcelorMittal Lázaro Cárdenas steel plant (DRI-EAF)	Mexico	ArcelorMittal SA [100%]	1					3200	4000	integrated (DRI)	DRI, EAF	operating					2.94805	2.84641	2.53113	2.39917	2.68119	2.68119	2.68119	2.68119	2.68119	2.68119	2.68119	2.68119	2.68119	2.68119	2.68119	2.68119	2.68119	2.68119	2.68119	2.68119	2.68119	2.68119	2.68119	2.68119	2.68119	2.68119	2.68119	2.68119	2.68119
ArcelorMittal S.A.	SMA00002			ArcelorMittal Sonasid Casablanca steel plant	Morocco	ArcelorMittal SA [100%]	1	800	800	N/A		N/A	800	electric	EAF	operating					0.0288254	0.0278316	0.0247489	0.0234585	0.0262161	0.0262161	0.0262161	0.0262161	0.0262161	0.0262161	0.0262161	0.0262161	0.0262161	0.0262161	0.0262161	0.0262161	0.0262161	0.0262161	0.0262161	0.0262161	0.0262161	0.0262161	0.0262161	0.0262161	0.0262161	0.0262161	0.0262161	0.0262161	0.0262161
ArcelorMittal S.A.	SPL00001			ArcelorMittal Dąbrowa Górnicza steel plant	Poland	ArcelorMittal SA [100%]	1	5000	5000	4500		N/A	N/A	integrated (BF)	BF, BOF	operating					6.21196	5.99779	5.33346	5.05539	5.64965	5.64965	5.64965	5.64965	5.64965	5.64965	5.64965	5.64965	5.64965	5.64965	5.64965	5.64965	5.64965	5.64965	5.64965	5.64965	5.64965	5.64965	5.64965	5.64965	5.64965	5.64965	5.64965	5.64965	5.64965
ArcelorMittal S.A.	SPL00006			ArcelorMittal Warszawa steel plant	Poland	ArcelorMittal SA [100%]	1	750	750	N/A		N/A	750	electric	EAF	operating					0.0210575	0.0203315	0.0180795	0.0171369	0.0191514	0.0191514	0.0191514	0.0191514	0.0191514	0.0191514	0.0191514	0.0191514	0.0191514	0.0191514	0.0191514	0.0191514	0.0191514	0.0191514	0.0191514	0.0191514	0.0191514	0.0191514	0.0191514	0.0191514	0.0191514	0.0191514	0.0191514	0.0191514	0.0191514
ArcelorMittal S.A.	SRO00002			ArcelorMittal Hunedoara steel plant	Romania	ArcelorMittal Hunedoara SA [100%]	1	800	800	N/A		N/A	800	electric	EAF	operating					0.0224613	0.0216869	0.0192848	0.0182794	0.0204281	0.0204281	0.0204281	0.0204281	0.0204281	0.0204281	0.0204281	0.0204281	0.0204281	0.0204281	0.0204281	0.0204281	0.0204281	0.0204281	0.0204281	0.0204281	0.0204281	0.0204281	0.0204281	0.0204281	0.0204281	0.0204281	0.0204281	0.0204281	0.0204281
ArcelorMittal S.A.	SZA00001			ArcelorMittal Newcastle Steel Works	South Africa	Arcelormittal South Africa Ltd [100%]	0.6922	1900	1900	2044		N/A	N/A	integrated (BF)	BF, BOF	operating					3.29563	3.18201	2.82956	2.68204	0	0	0	0	0	0	0	0	0	0	0	0	0	0	0	0	0	0	0	0	0	0	0	0	0
ArcelorMittal S.A.	SZA00004			ArcelorMittal Saldanha Steel Works	South Africa	Arcelormittal South Africa Ltd [100%]	0.6922	1200	1200	760		800	1200	ironmaking (DRI)	BF, DRI, EAF	mothballed					0	0	0	0	0	0	0	0	0	0	0	0	0	0	0	0	0	0	0	0	0	0	0	0	0	0	0	0	0
ArcelorMittal S.A.	SZA00002			ArcelorMittal Vanderbijlpark Steel Works	South Africa	Arcelormittal South Africa Ltd [100%]	0.6922	4500	4500	3200		950	N/A	integrated (BF)	BF, BOF, DRI	operating					5.89745	5.69412	5.06342	4.79943	5.36361	5.36361	5.36361	5.36361	5.36361	5.36361	5.36361	5.36361	5.36361	5.36361	5.36361	5.36361	5.36361	5.36361	5.36361	5.36361	5.36361	5.36361	5.36361	5.36361	5.36361	5.36361	5.36361	5.36361	5.36361
ArcelorMittal S.A.	SZA00002			Dummy - ArcelorMittal Vanderbijlpark Steel Works transition (EAF addition)	South Africa	Arcelormittal South Africa Ltd [100%]	0.6922	1700	1176.74		N/A		1700	electric	EAF	announced					0	0	0	0	0	0	0	0	0	0	0	0	0	0	0	0	0	0	0	0	0	0	0	0	0	0	0	0	0
ArcelorMittal S.A.	SES00001			ArcelorMittal Asturias (Gijón) steel plant	Spain	ArcelorMittal SA [100%]	1	1200	1200	4200		N/A	N/A	integrated (BF)	BF, BOF	operating					1.49087	1.43947	1.28003	1.21329	1.35592	1.35592	1.35592	1.35592	1.35592	1.35592	1.35592	1.35592	1.35592	1.35592	1.35592	1.35592	1.35592	1.35592	1.35592	1.35592	1.35592	1.35592	1.35592	1.35592	1.35592	1.35592	1.35592	1.35592	1.35592
ArcelorMittal S.A.	SES00001			Dummy - ArcelorMittal Asturias (Gijón) steel plant EAF expansion	Spain	ArcelorMittal SA [100%]	1							electric	EAF	construction					0	0	0	0	0	0	0.0280886	0.0280886	0.0280886	0.0280886	0.0280886	0.0280886	0.0280886	0.0280886	0.0280886	0.0280886	0.0280886	0.0280886	0.0280886	0.0280886	0.0280886	0.0280886	0.0280886	0.0280886	0.0280886	0.0280886	0.0280886	0.0280886	0.0280886
ArcelorMittal S.A.	SES00001			Dummy - ArcelorMittal Asturias (Gijón) steel plant DRI expansion	Spain	ArcelorMittal SA [100%]	1							integrated (DRI)	DRI, EAF	announced					0	0	0	0	0	0	0	0	0	0	0	0	0	0	0	0	0	0	0	0	0	0	0	0	0	0	0	0	0
ArcelorMittal S.A.	SES00007			ArcelorMittal Olaberria-Bergara (Olaberria) steel plant	Spain	ArcelorMittal SA [100%]	1	1450	1450	N/A		N/A	1450	electric	EAF	operating					0.0407111	0.0393076	0.0349537	0.0331314	0.0370259	0.0370259	0.0370259	0.0370259	0.0370259	0.0370259	0.0370259	0.0370259	0.0370259	0.0370259	0.0370259	0.0370259	0.0370259	0.0370259	0.0370259	0.0370259	0.0370259	0.0370259	0.0370259	0.0370259	0.0370259	0.0370259	0.0370259	0.0370259	0.0370259
ArcelorMittal S.A.	SES00008			ArcelorMittal Asturias (Avilés) steel plant	Spain	ArcelorMittal SA [100%]	1	4200	4200	N/A		N/A	N/A	oxygen	BOF	operating					0.589609	0.569282	0.506227	0.479834	0.536238	0.536238	0.536238	0.536238	0.536238	0.536238	0.536238	0.536238	0.536238	0.536238	0.536238	0.536238	0.536238	0.536238	0.536238	0.536238	0.536238	0.536238	0.536238	0.536238	0.536238	0.536238	0.536238	0.536238	0.536238
ArcelorMittal S.A.	SES00002			ArcelorMittal Sestao steel plant	Spain	ArcelorMittal SA [100%]	1	2000	2000	N/A		N/A	2000	electric	EAF	operating					0.0561533	0.0542173	0.048212	0.0456984	0.0510703	0.0510703	0.0510703	0.0510703	0.0510703	0.0510703	0.0510703	0.0510703	0.0510703	0.0510703	0.0510703	0.0510703	0.0510703	0.0510703	0.0510703	0.0510703	0.0510703	0.0510703	0.0510703	0.0510703	0.0510703	0.0510703	0.0510703	0.0510703	0.0510703
ArcelorMittal S.A.	SUA00002			ArcelorMittal Kryvyi Rih steel plant	Ukraine	ArcelorMittal SA [100%]	1	8000	8000	11450		N/A	N/A	integrated (BF)	BF, BOF, OHF	operating					12.9153	12.47	3.32663	3.15319	3.52385	3.52385	3.52385	3.52385	3.52385	3.52385	3.52385	3.52385	3.52385	3.52385	3.52385	3.52385	3.52385	3.52385	3.52385	3.52385	3.52385	3.52385	3.52385	3.52385	3.52385	3.52385	3.52385	3.52385	3.52385
ArcelorMittal S.A.	SUS00081			AM/NS Calvert LLC	United States	ArcelorMittal SA [50%]; Nippon Steel Corp [50%]	0.5	1500	750	N/A		N/A	1500	electric	EAF	operating					0	0	0	0.0171369	0.0191514	0.0191514	0.0191514	0.0191514	0.0191514	0.0191514	0.0191514	0.0191514	0.0191514	0.0191514	0.0191514	0.0191514	0.0191514	0.0191514	0.0191514	0.0191514	0.0191514	0.0191514	0.0191514	0.0191514	0.0191514	0.0191514	0.0191514	0.0191514	0.0191514
ArcelorMittal S.A.	SUS00053			ArcelorMittal Texas DRI plant	United States	ArcelorMittal SA [80%]; voestalpine AG [20%]	0.8	N/A	1600	N/A		2000	N/A	ironmaking (DRI)	DRI	operating					0	0	0.588187	0.557521	0.623057	0.623057	0.623057	0.623057	0.623057	0.623057	0.623057	0.623057	0.623057	0.623057	0.623057	0.623057	0.623057	0.623057	0.623057	0.623057	0.623057	0.623057	0.623057	0.623057	0.623057	0.623057	0.623057	0.623057	0.623057
Total CO2 emissions																					113.8	109.877	90.5327	89.5827	91.9182	101.899	103.325	103.325	123.273	145.216	145.216	145.216	145.216	145.216	145.216	145.216	145.216	145.216	145.216	145.216	145.216	145.216	145.216	145.216	145.216	145.216	145.216	145.216	145.216
[truncated: 2 more columns]

## Sheet: ArcelorMittal_TP
Company name (CA100+)	GEM Plant ID	GEM Unit ID	Unit name	Plant name (English)	Country	Parent [formula]	Ownership share	Total nominal crude steel capacity (ttpa)	Owned nominal crude steel capacity (ttpa)	Nominal BF capacity (ttpa)	Nominal BOF capacity (ttpa)	Nominal DRI capacity (ttpa)	Nominal EAF steel capacity (ttpa)	Main production process	Main production equipment	Status	Plant/Unit - Start date	Last relining (year)	Announced phase-out (year)	Relining required (year)	2020	2021	2022	2023	2024	2025	2026	2027	2028	2029	2030	2031	2032	2033	2034	2035	2036	2037	2038	2039	2040	2041	2042	2043	2044	2045	2046	2047	2048
ArcelorMittal S.A.	SAR00001			ArcelorMittal Acindar Villa Constitución steel plant	Argentina	ArcelorMittal SA [100%]	1	1750	1750	N/A	N/A	600	1750	integrated (DRI)	DRI, EAF	operating	1946				1750	1750	1750	1750	1750	1750	1750	1750	1750	1750	1750	1750	1750	1750	1750	1750	1750	1750	1750	1750	1750	1750	1750	1750	1750	1750	1750	1750	1750
ArcelorMittal S.A.	SBE00001			ArcelorMittal Gent steel plant	Belgium	ArcelorMittal SA [100%]	1	5000	5000	5000	5000	N/A	N/A	integrated (BF)	BF, BOF	operating	1966				5000	5000	5000	5000	5000	5000	5000	5000	5000	5000	2300	2300	2300	2300	2300	2300	2300	2300	2300	2300	2300	2300	2300	2300	2300	2300	2300	2300	2300
ArcelorMittal S.A.	SBE00001-1			Dummy - ArcelorMittal Gent steel plant (DRI-EAF addition)	Belgium	ArcelorMittal SA [100%]	1	2500	2500	N/A		2500	2500	integrated (DRI)	DRI, EAF	announced	2030				0	0	0	0	0	0	0	0	0	0	2500	2500	2500	2500	2500	2500	2500	2500	2500	2500	2500	2500	2500	2500	2500	2500	2500	2500	2500
ArcelorMittal S.A.	SBE00001	U000013	B	ArcelorMittal Gent steel plant	Belgium	ArcelorMittal SA [100%]	1	2300	2300	2300					BF	operating	1967	2021	N/A	2041	2300	2300	2300	2300	2300	2300	2300	2300	2300	2300	2300	2300	2300	2300	2300	2300	2300	2300	2300	2300	2300	2300	2300	2300	2300	2300	2300	2300	2300
ArcelorMittal S.A.	SBE00001	U000014	A	ArcelorMittal Gent steel plant	Belgium	ArcelorMittal SA [100%]	1	2700	2700	2700					BF	operating	1966	2003	2030	2023	2700	2700	2700	2700	2700	2700	2700	2700	2700	2700	2700	2700	2700	2700	2700	2700	2700	2700	2700	2700	2700	2700	2700	2700	2700	2700	2700	2700	2700
ArcelorMittal S.A.	SBA00001			ArcelorMittal Zenica steel plant	Bosnia and Herzegovina	ArcelorMittal SA [100%]	1	1940	1940	1100	1140	N/A	800	integrated (BF)	BF, BOF, EAF	operating	1892				1140	1140	1140	1140	1140	1140	1140	1140	1140	1140	1140	1140	1140	1140	1140	1140	1140	1140	1140	1140	1140	1140	1140	1140	1140	1140	1140	1140	1140
ArcelorMittal S.A.	SBA00001			ArcelorMittal Zenica steel plant (scrap-EAF)	Bosnia and Herzegovina	ArcelorMittal SA [100%]	1						800	electric	EAF	operating					800	800	800	800	800	800	800	800	800	800	800	800	800	800	800	800	800	800	800	800	800	800	800	800	800	800	800	800	800
ArcelorMittal S.A.	SBA00001	U000011	4	ArcelorMittal Zenica steel plant	Bosnia and Herzegovina	ArcelorMittal SA [100%]	1	1100	1100	1100					BF	operating	2004	2018	N/A	2038	1100	1100	1100	1100	1100	1100	1100	1100	1100	1100	1100	1100	1100	1100	1100	1100	1100	1100	1100	1100	1100	1100	1100	1100	1100	1100	1100	1100	1100
ArcelorMittal S.A.	SBR00018			ArcelorMittal Barra Mansa steel plant	Brazil	ArcelorMittal SA [100%]	1	800	800	N/A	N/A	N/A	800	electric	EAF	operating	1937				800	800	800	800	800	800	800	800	800	800	800	800	800	800	800	800	800	800	800	800	800	800	800	800	800	800	800	800	800
ArcelorMittal S.A.	SBR00013			ArcelorMittal Juiz de Fora steel plant	Brazil	ArcelorMittal SA [100%]	1	1100	1100	360	N/A	N/A	1100	integrated (BF-EAF)	BF, EAF	operating	1984				360	360	360	360	360	360	360	360	360	360	360	360	360	360	360	360	360	360	360	360	360	360	360	360	360	360	360	360	360
ArcelorMittal S.A.	SBR00013			ArcelorMittal Juiz de Fora steel plant (scrap-EAF)	Brazil	ArcelorMittal SA [100%]	1						1100	electric	EAF	operating					740	740	740	740	740	740	740	740	740	740	740	740	740	740	740	740	740	740	740	740	740	740	740	740	740	740	740	740	740
ArcelorMittal S.A.	SBR00013	U000034	1	ArcelorMittal Juiz de Fora steel plant	Brazil	ArcelorMittal SA [100%]	1	180	180	180					BF	operating	January 2007	2020	N/A	2040	180	180	180	180	180	180	180	180	180	180	180	180	180	180	180	180	180	180	180	180	180	180	180	180	180	180	180	180	180
ArcelorMittal S.A.	SBR00013	U000035	2	ArcelorMittal Juiz de Fora steel plant	Brazil	ArcelorMittal SA [100%]	1	180	180	180					BF	operating	February 2007	2021	N/A	2041	180	180	180	180	180	180	180	180	180	180	180	180	180	180	180	180	180	180	180	180	180	180	180	180	180	180	180	180	180
ArcelorMittal S.A.	SBR00003			ArcelorMittal Monlevade steel plant	Brazil	ArcelorMittal SA [100%]	1	1200	1200	1040	1200	N/A	N/A	integrated (BF)	BF, BOF	operating	1937				1200	1200	1200	1200	1200	1200	1200	1200	1200	1200	1200	1200	1200	1200	1200	1200	1200	1200	1200	1200	1200	1200	1200	1200	1200	1200	1200	1200	1200
				Dummy - ArcelorMittal Monlevade steel plant (BF-EAF)	Brazil	ArcelorMittal SA [100%]	1			1200			1000	integrated (BF-EAF)	BF, EAF	construction					0	0	0	0	0	0	1000	1000	1000	1000	1000	1000	1000	1000	1000	1000	1000	1000	1000	1000	1000	1000	1000	1000	1000	1000	1000	1000	1000
ArcelorMittal S.A.	SBR00003-1			ArcelorMittal Monlevade steel BF and EAF expansion	Brazil	ArcelorMittal SA [100%]	1	1000	1000	1200		N/A	1000	integrated (BF-EAF)	BF, EAF	construction	2024				0	0	0	0	0	0	1000	1000	1000	1000	1000	1000	1000	1000	1000	1000	1000	1000	1000	1000	1000	1000	1000	1000	1000	1000	1000	1000	1000
ArcelorMittal S.A.	SBR00003-1	U000021	B	ArcelorMittal Monlevade steel BF expansion	Brazil	ArcelorMittal SA [100%]	1	1200	1200	1200					BF	announced	2024	NA	N/A	2044	0	0	0	0	0	0	1200	1200	1200	1200	1200	1200	1200	1200	1200	1200	1200	1200	1200	1200	1200	1200	1200	1200	1200	1200	1200	1200	1200
ArcelorMittal S.A.	SBR00003	U000020	A	ArcelorMittal Monlevade steel plant	Brazil	ArcelorMittal SA [100%]	1	1040	1040	1040					BF	operating	December 1999	2027	N/A	2047	1040	1040	1040	1040	1040	1040	1040	1040	1040	1040	1040	1040	1040	1040	1040	1040	1040	1040	1040	1040	1040	1040	1040	1040	1040	1040	1040	1040	1040
ArcelorMittal S.A.	SBR00008			ArcelorMittal Pecém steel plant	Brazil	ArcelorMittal SA [100%]	1	3000	3000	3192	3000	N/A	N/A	integrated (BF)	BF, BOF	operating	2016				0	0	0	3000	3000	3000	3000	3000	3000	3000	3000	3000	3000	3000	3000	3000	3000	3000	3000	3000	3000	3000	3000	3000	3000	3000	3000	3000	3000
ArcelorMittal S.A.	SBR00008	U000028	1	ArcelorMittal Pecém steel plant	Brazil	ArcelorMittal SA [100%]	1	3191.93	3191.93	3191.93					BF	operating	June 2016	2016	N/A	2036	0	0	0	3191.93	3191.93	3191.93	3191.93	3191.93	3191.93	3191.93	3191.93	3191.93	3191.93	3191.93	3191.93	3191.93	3191.93	3191.93	3191.93	3191.93	3191.93	3191.93	3191.93	3191.93	3191.93	3191.93	3191.93	3191.93	3191.93
ArcelorMittal S.A.	SBR00009			ArcelorMittal Piracicaba steel plant	Brazil	ArcelorMittal SA [100%]	1	1100	1100	N/A	N/A	N/A	1100	electric	EAF	operating	1955				1100	1100	1100	1100	1100	1100	1100	1100	1100	1100	1100	1100	1100	1100	1100	1100	1100	1100	1100	1100	1100	1100	1100	1100	1100	1100	1100	1100	1100
ArcelorMittal S.A.	SBR00004			ArcelorMittal Resende steel plant	Brazil	ArcelorMittal SA [100%]	1	1000	1000	N/A	N/A	N/A	1000	electric	EAF	operating	2009				1000	1000	1000	1000	1000	1000	1000	1000	1000	1000	1000	1000	1000	1000	1000	1000	1000	1000	1000	1000	1000	1000	1000	1000	1000	1000	1000	1000	1000
ArcelorMittal S.A.	SBR00002			ArcelorMittal Tubarão steel plant	Brazil	ArcelorMittal SA [100%]	1	7500	7500	7280	7500	N/A	N/A	integrated (BF)	BF, BOF	operating	1983				7500	7500	7500	7500	7500	7500	7500	7500	7500	7500	7500	7500	7500	7500	7500	7500	7500	7500	7500	7500	7500	7500	7500	7500	7500	7500	7500	7500	7500
ArcelorMittal S.A.	SBR00002	U000017	1	ArcelorMittal Tubarão steel plant	Brazil	ArcelorMittal SA [100%]	1	3280	3280	3280					BF	operating	November 1983	2012	N/A	2032	3280	3280	3280	3280	3280	3280	3280	3280	3280	3280	3280	3280	3280	3280	3280	3280	3280	3280	3280	3280	3280	3280	3280	3280	3280	3280	3280	3280	3280
ArcelorMittal S.A.	SBR00002	U000018	2	ArcelorMittal Tubarão steel plant	Brazil	ArcelorMittal SA [100%]	1	1200	1200	1200					BF	operating	July 1998	2019	N/A	2039	1200	1200	1200	1200	1200	1200	1200	1200	1200	1200	1200	1200	1200	1200	1200	1200	1200	1200	1200	1200	1200	1200	1200	1200	1200	1200	1200	1200	1200
ArcelorMittal S.A.	SBR00002	U000019	3	ArcelorMittal Tubarão steel plant	Brazil	ArcelorMittal SA [100%]	1	2800	2800	2800					BF	operating	July 2007	2007	N/A	2027	2800	2800	2800	2800	2800	2800	2800	2800	2800	2800	2800	2800	2800	2800	2800	2800	2800	2800	2800	2800	2800	2800	2800	2800	2800	2800	2800	2800	2800
ArcelorMittal S.A.	SCA00002			ArcelorMittal Dofasco steel plant	Canada	ArcelorMittal SA [100%]	1	4050	4050	3024	2700	N/A	1350	integrated (BF)	BF, BOF, EAF	operating	1912				4050	4050	4050	4050	4050	4050	4050	4050	1650	1650	1650	1650	1650	1650	1650	1650	1650	1650	1650	1650	1650	1650	1650	1650	1650	1650	1650	1650	1650
ArcelorMittal S.A.	SCA00002-1			Dummy - ArcelorMittal Dofasco steel plant transition (DRI-EAF addition)	Canada	ArcelorMittal SA [100%]	1	2400	2400	N/A		2500	2400	integrated (DRI)	DRI, EAF	announced	2028				0	0	0	0	0	0	0	0	2400	2400	2400	2400	2400	2400	2400	2400	2400	2400	2400	2400	2400	2400	2400	2400	2400	2400	2400	2400	2400
ArcelorMittal S.A.	SCA00002	U000048	2	ArcelorMittal Dofasco steel plant	Canada	ArcelorMittal SA [100%]	1	785	785	785					BF	operating	1957	2005	2028	2025	785	785	785	785	785	785	785	785	785	785	785	785	785	785	785	785	785	785	785	785	785	785	785	785	785	785	785	785	785
ArcelorMittal S.A.	SCA00002	U000049	3	ArcelorMittal Dofasco steel plant	Canada	ArcelorMittal SA [100%]	1	716	716	716					BF	mothballed	2010	2010	April 2020	2030	716	716	716	716	716	716	716	716	716	716	716	716	716	716	716	716	716	716	716	716	716	716	716	716	716	716	716	716	716
ArcelorMittal S.A.	SCA00002	U000050	4	ArcelorMittal Dofasco steel plant	Canada	ArcelorMittal SA [100%]	1	1523	1523	1523					BF	operating	1971	1998	2028	2018	1523	1523	1523	1523	1523	1523	1523	1523	1523	1523	1523	1523	1523	1523	1523	1523	1523	1523	1523	1523	1523	1523	1523	1523	1523	1523	1523	1523	1523
ArcelorMittal S.A.	SCA00001			ArcelorMittal Montreal steel plant (ArcelorMittal Canada 1 & 2)	Canada	ArcelorMittal SA [100%]	1	2400	2400	N/A	N/A	1000	2400	integrated (DRI)	DRI, EAF	operating	1914				2400	2400	2400	2400	2400	2400	2400	2400	2400	2400	2400	2400	2400	2400	2400	2400	2400	2400	2400	2400	2400	2400	2400	2400	2400	2400	2400	2400	2400
ArcelorMittal S.A.	SFR00001			ArcelorMittal Dunkerque steel plant	France	ArcelorMittal SA [100%]	1	6750	6750	6900	6750	N/A	N/A	integrated (BF)	BF, BOF	operating	unknown				6750	6750	6750	6750	6750	6750	6750	2250	2250	2250	2250	2250	2250	2250	2250	2250	2250	2250	2250	2250	2250	2250	2250	2250	2250	2250	2250	2250	2250
ArcelorMittal S.A.	SFR00001			ArcelorMittal Dunkerque steel plant (scrap-EAF)	France	ArcelorMittal SA [100%]	1							electric	EAF	announced	2027				0	0	0	0	0	0	0	2000	2000	2000	2000	2000	2000	2000	2000	2000	2000	2000	2000	2000	2000	2000	2000	2000	2000	2000	2000	2000	2000
ArcelorMittal S.A.	SFR00001-1			Dummy - ArcelorMittal Dunkerque steel plant transition (DRI and EAF addition)	France	ArcelorMittal SA [100%]	1	4500	4500	N/A		2500	4500	integrated (DRI)	DRI, EAF	announced	2027				0	0	0	0	0	0	0	2500	2500	2500	2500	2500	2500	2500	2500	2500	2500	2500	2500	2500	2500	2500	2500	2500	2500	2500	2500	2500	2500
ArcelorMittal S.A.	SFR00001	U000989	4	ArcelorMittal Dunkerque steel plant	France	ArcelorMittal SA [100%]	1	3700	3700	3700					BF	operating	1971	2016	N/A	2036	3700	3700	3700	3700	3700	3700	3700	3700	3700	3700	3700	3700	3700	3700	3700	3700	3700	3700	3700	3700	3700	3700	3700	3700	3700	3700	3700	3700	3700
ArcelorMittal S.A.	SFR00001	U000990	2	ArcelorMittal Dunkerque steel plant	France	ArcelorMittal SA [100%]	1	1500	1500	1500					BF	mothballed	1963	NA	N/A	2023	1500	1500	1500	1500	1500	1500	1500	1500	1500	1500	1500	1500	1500	1500	1500	1500	1500	1500	1500	1500	1500	1500	1500	1500	1500	1500	1500	1500	1500
ArcelorMittal S.A.	SFR00001	U000991	3	ArcelorMittal Dunkerque steel plant	France	ArcelorMittal SA [100%]	1	1800	1800	1800					BF	operating	1968	2022	N/A	2042	1800	1800	1800	1800	1800	1800	1800	1800	1800	1800	1800	1800	1800	1800	1800	1800	1800	1800	1800	1800	1800	1800	1800	1800	1800	1800	1800	1800	1800
ArcelorMittal S.A.	SFR00002			ArcelorMittal Méditerranée Fos sur Mer steel plant	France	ArcelorMittal SA [100%]	1	4000	4000	4000	4000	N/A	N/A	integrated (BF)	BF, BOF	operating	1980				4000	4000	4000	4000	4000	4000	4000	4000	4000	4000	4000	2000	2000	2000	2000	2000	2000	2000	2000	2000	2000	2000	2000	2000	2000	2000	2000	2000	2000
ArcelorMittal S.A.	SFR00002-1			Dummy - ArcelorMittal Méditerranée Fos sur Mer steel plant transition (EAF addition)	France	ArcelorMittal SA [100%]	1	2000	2000	N/A		N/A	2000	electric	EAF	announced	2027				0	0	0	0	0	0	0	2000	2000	2000	2000	2000	2000	2000	2000	2000	2000	2000	2000	2000	2000	2000	2000	2000	2000	2000	2000	2000	2000
ArcelorMittal S.A.	SFR00002	U000992	1	ArcelorMittal Méditerranée Fos sur Mer steel plant	France	ArcelorMittal SA [100%]	1	2000	2000	2000					BF	operating	1974	2016	N/A	2036	2000	2000	2000	2000	2000	2000	2000	2000	2000	2000	2000	2000	2000	2000	2000	2000	2000	2000	2000	2000	2000	2000	2000	2000	2000	2000	2000	2000	2000
ArcelorMittal S.A.	SFR00002	U000993	2	ArcelorMittal Méditerranée Fos sur Mer steel plant	France	ArcelorMittal SA [100%]	1	2000	2000	2000					BF	operating	1977	2011	N/A	2031	2000	2000	2000	2000	2000	2000	2000	2000	2000	2000	2000	0	0	0	0	0	0	0	0	0	0	0	0	0	0	0	0	0	0
ArcelorMittal S.A.	SDE00003			AG der Dillinger Hüttenwerke Dillingen steel plant	Germany	SHS Stahl Holding Saar GmbH & Co KgaA [57.2%]; ArcelorMittal SA [33.4%]; Saarstahl AG [9.4%]	0.334	2760	921.84	4790	2760	N/A	N/A	integrated (BF)	BF, BOF	operating	1969				921.84	921.84	921.84	921.84	921.84	921.84	921.84	337.34	337.34	337.34	337.34	337.34	337.34	337.34	337.34	337.34	337.34	337.34	337.34	337.34	337.34	337.34	337.34	337.34	337.34	337.34	337.34	337.34	337.34
ArcelorMittal S.A.	SDE00003-1			Dummy - AG der Dillinger Hüttenwerke Dillingen steel plant transition (DRI-EAF addition)	Germany	SHS Stahl Holding Saar GmbH & Co KgaA [57.2%]; ArcelorMittal SA [33.4%]; Saarstahl AG [9.4%]	0.334	1750	584.5	N/A		2500	1750	integrated (DRI)	DRI, EAF	announced	2027				0	0	0	0	0	0	0	584.5	584.5	584.5	584.5	584.5	584.5	584.5	584.5	584.5	584.5	584.5	584.5	584.5	584.5	584.5	584.5	584.5	584.5	584.5	584.5	584.5	584.5
ArcelorMittal S.A.	SDE00003	U000973	3	AG der Dillinger Hüttenwerke Dillingen steel plant	Germany	SHS Stahl Holding Saar GmbH & Co KgaA [57.2%]; ArcelorMittal SA [33.4%]; Saarstahl AG [9.4%]	0.334	730	243.82	730					BF	mothballed	1965	2003	N/A	2023	243.82	243.82	243.82	243.82	243.82	243.82	243.82	243.82	243.82	243.82	243.82	243.82	243.82	243.82	243.82	243.82	243.82	243.82	243.82	243.82	243.82	243.82	243.82	243.82	243.82	243.82	243.82	243.82	243.82
ArcelorMittal S.A.	SDE00003	U000974	4	AG der Dillinger Hüttenwerke Dillingen steel plant	Germany	SHS Stahl Holding Saar GmbH & Co KgaA [57.2%]; ArcelorMittal SA [33.4%]; Saarstahl AG [9.4%]	0.334	2227	743.818	2227					BF	operating	1974	2019	N/A	2039	743.818	743.818	743.818	743.818	743.818	743.818	743.818	743.818	743.818	743.818	743.818	743.818	743.818	743.818	743.818	743.818	743.818	743.818	743.818	743.818	743.818	743.818	743.818	743.818	743.818	743.818	743.818	743.818	743.818
ArcelorMittal S.A.	SDE00003	U000975	5	AG der Dillinger Hüttenwerke Dillingen steel plant	Germany	SHS Stahl Holding Saar GmbH & Co KgaA [57.2%]; ArcelorMittal SA [33.4%]; Saarstahl AG [9.4%]	0.334	2555	853.37	2555					BF	operating	1985	2010	N/A	2030	853.37	853.37	853.37	853.37	853.37	853.37	853.37	0	0	0	0	0	0	0	0	0	0	0	0	0	0	0	0	0	0	0	0	0	0
ArcelorMittal S.A.	SDE00003-2			AG der Dillinger Hüttenwerke Dillingen steel plant transition (EAF addition)	Germany	SHS Stahl Holding Saar GmbH & Co KgaA [57.2%]; ArcelorMittal SA [33.4%]; Saarstahl AG [9.4%]	0.334	1400	467.6	N/A		N/A	1400	electric	EAF	announced	2045				0	0	0	0	0	0	0	0	0	0	0	0	0	0	0	0	0	0	0	0	0	0	0	0	0	0	0	0	0
ArcelorMittal S.A.	SDE00006			ArcelorMittal Bremen steel plant	Germany	ArcelorMittal SA [100%]	1	3400	3400	3800	3800	N/A	N/A	integrated (BF)	BF, BOF	operating	1957				3400	3400	3400	3400	3400	3400	3400	3400	3400	3400	1650	1650	1650	1650	1650	1650	1650	1650	1650	1650	1650	1650	1650	1650	1650	1650	1650	1650	1650
ArcelorMittal S.A.	SDE00006-1			Dummy - ArcelorMittal Bremen steel plant transition (DRI-EAF addition)	Germany	ArcelorMittal SA [100%]	1	1750	1750	N/A		2000	1750	integrated (DRI)	DRI, EAF	announced	2030				0	0	0	0	0	0	0	0	0	0	1750	1750	1750	1750	1750	1750	1750	1750	1750	1750	1750	1750	1750	1750	1750	1750	1750	1750	1750
ArcelorMittal S.A.	SDE00006	U000978	2	ArcelorMittal Bremen steel plant	Germany	ArcelorMittal SA [100%]	1	1800	1800	1800					BF	operating	1954	2016	N/A	2036	1800	1800	1800	1800	1800	1800	1800	1800	1800	1800	1800	1800	1800	1800	1800	1800	1800	1800	1800	1800	1800	1800	1800	1800	1800	1800	1800	1800	1800
ArcelorMittal S.A.	SDE00006	U000979	3	ArcelorMittal Bremen steel plant	Germany	ArcelorMittal SA [100%]	1	1250	1250	1250					BF	operating	1966	2009	N/A	2029	1250	1250	1250	1250	1250	1250	1250	1250	1250	1250	0	0	0	0	0	0	0	0	0	0	0	0	0	0	0	0	0	0	0
ArcelorMittal S.A.	SDE00008			ArcelorMittal Duisburg steel plant	Germany	ArcelorMittal SA [100%]	1	1300	1300	N/A	1300	N/A	N/A	oxygen	BOF	operating	1852				1300	1300	1300	1300	1300	1300	1300	1300	1300	0	0	0	0	0	0	0	0	0	0	0	0	0	0	0	0	0	0	0	0
ArcelorMittal S.A.	SDE00008-1			Dummy - ArcelorMittal Duisburg steel plant transition (EAF addition)	Germany	ArcelorMittal SA [100%]	1	1000	1000	N/A		N/A	1000	electric	EAF	announced	2030				0	0	0	0	0	0	0	0	0	1000	1000	1000	1000	1000	1000	1000	1000	1000	1000	1000	1000	1000	1000	1000	1000	1000	1000	1000	1000
ArcelorMittal S.A.	SDE00005			ArcelorMittal Eisenhüttenstadt steel plant	Germany	ArcelorMittal SA [100%]	1	2400	2400	1825	2400	N/A	N/A	integrated (BF)	BF, BOF	operating	1950				2400	2400	2400	2400	2400	2400	2400	2400	2400	2400	0	0	0	0	0	0	0	0	0	0	0	0	0	0	0	0	0	0	0
ArcelorMittal S.A.	SDE00005-1			Dummy - ArcelorMittal Eisenhüttenstadt steel plant transition (DRI-EAF addition)	Germany	ArcelorMittal SA [100%]	1	1750	1750	N/A		>0	1750	integrated (DRI)	DRI, EAF	announced	2030				0	0	0	0	0	0	0	0	0	0	1750	1750	1750	1750	1750	1750	1750	1750	1750	1750	1750	1750	1750	1750	1750	1750	1750	1750	1750
ArcelorMittal S.A.	SDE00005	U000977	5A	ArcelorMittal Eisenhüttenstadt steel plant	Germany	ArcelorMittal SA [100%]	1	1825	1825	1825					BF	operating	1997	2021	N/A	2041	1825	1825	1825	1825	1825	1825	1825	1825	1825	1825	1825	0	0	0	0	0	0	0	0	0	0	0	0	0	0	0	0	0	0
ArcelorMittal S.A.	SDE00007			ArcelorMittal Hamburg steel plant	Germany	ArcelorMittal SA [100%]	1	1100	1100	N/A	N/A	600	1100	integrated (DRI)	DRI, EAF	operating	1969				600	600	600	600	600	600	700	700	700	700	1300	1300	1300	1300	1300	1300	1300	1300	1300	1300	1300	1300	1300	1300	1300	1300	1300	1300	1300
ArcelorMittal S.A.	SDE00007			ArcelorMittal Hamburg steel plant (scrap-EAF)	Germany	ArcelorMittal SA [100%]	1						1100	electric	EAF	operating					500	500	500	500	500	500	500	500	500	500	500	500	500	500	500	500	500	500	500	500	500	500	500	500	500	500	500	500	500
ArcelorMittal S.A.	SDE00007-1			ArcelorMittal Hamburg steel plant (DRI addition phase I)	Germany	ArcelorMittal SA [100%]	1	100	100	N/A		100	N/A	ironmaking (DRI)	DRI	announced	2026				0	0	0	0	0	0	100	100	100	100	100	100	100	100	100	100	100	100	100	100	100	100	100	100	100	100	100	100	100
ArcelorMittal S.A.	SDE00007-2			ArcelorMittal Hamburg steel plant (DRI addition phase II)	Germany	ArcelorMittal SA [100%]	1	600	600	N/A		600	N/A	ironmaking (DRI)	DRI	announced	2030				0	0	0	0	0	0	0	0	0	0	600	600	600	600	600	600	600	600	600	600	600	600	600	600	600	600	600	600	600
ArcelorMittal S.A.	SIN00066			ArcelorMittal Nippon Steel Kendrapara plant	India	ArcelorMittal SA [60%]; Nippon Steel Corp [40%]	0.6	14000	8400	unknown	12000	unknown	N/A	oxygen	BOF	announced	2028				0	0	0	0	0	0	0	0	8400	8400	8400	8400	8400	8400	8400	8400	8400	8400	8400	8400	8400	8400	8400	8400	8400	8400	8400	8400	8400
ArcelorMittal S.A.	SIN00004			ArcelorMittal Nippon Steel India Hazira Plant	India	ArcelorMittal SA [60%]; Nippon Steel Corp [40%]	0.6	9600	5760	2040		7830	9600	integrated (BF-EAF)	BF, DRI, EAF	operating	1997				1224	1224	1224	1224	1224	1224	1224	1224	1224	1224	1224	1224	1224	1224	1224	1224	1224	1224	1224	1224	1224	1224	1224	1224	1224	1224	1224	1224	1224
ArcelorMittal S.A.	SIN00004			ArcelorMittal Nippon Steel India Hazira Plant	India	ArcelorMittal SA [60%]; Nippon Steel Corp [40%]	0.6					7830		integrated (DRI)	DRI, EAF	operating					4698	4698	4698	4698	4698	4698	4698	4698	4698	4698	4698	4698	4698	4698	4698	4698	4698	4698	4698	4698	4698	4698	4698	4698	4698	4698	4698	4698	4698
ArcelorMittal S.A.	SIN00004			ArcelorMittal Nippon Steel India Hazira Plant	India	ArcelorMittal SA [60%]; Nippon Steel Corp [40%]	0.6				7000			integrated (BF)	BF, BOF	construction					0	0	0	0	0	4200	4200	4200	4200	9240	9240	9240	9240	9240	9240	9240	9240	9240	9240	9240	9240	9240	9240	9240	9240	9240	9240	9240	9240
ArcelorMittal S.A.	SIN00004	U001021	1	ArcelorMittal Nippon Steel India Hazira Plant	India	ArcelorMittal SA [60%]; Nippon Steel Corp [40%]	0.6	2040	1224	2040					BF	operating	2010	2025	N/A	2025	1224	1224	1224	1224	1224	1224	1224	1224	1224	1224	1224	1224	1224	1224	1224	1224	1224	1224	1224	1224	1224	1224	1224	1224	1224	1224	1224	1224	1224
ArcelorMittal S.A.	SIN00004-1			ArcelorMittal Nippon Steel India Hazira Plant BF and BOF expansion (I)	India	ArcelorMittal SA [60%]; Nippon Steel Corp [40%]	0.6	7000	4200	7000	7000	N/A	N/A	integrated (BF)	BF, BOF	construction	2025			2045	0	0	0	0	0	4200	4200	4200	4200	4200	4200	4200	4200	4200	4200	4200	4200	4200	4200	4200	4200	4200	4200	4200	4200	4200	4200	4200	4200
ArcelorMittal S.A.	SIN00004-1	U001316	2	ArcelorMittal Nippon Steel India Hazira Plant BF and BOF expansion	India	ArcelorMittal SA [60%]; Nippon Steel Corp [40%]	0.6	3500	2100	3500					BF	construction	2025	NA	N/A	2045	0	0	0	0	0	2100	2100	2100	2100	2100	2100	2100	2100	2100	2100	2100	2100	2100	2100	2100	2100	2100	2100	2100	2100	2100	2100	2100	2100
ArcelorMittal S.A.	SIN00004-1	U001317	3	ArcelorMittal Nippon Steel India Hazira Plant BF and BOF expansion	India	ArcelorMittal SA [60%]; Nippon Steel Corp [40%]	0.6	3500	2100	3500					BF	construction	2026	NA	N/A	2046	0	0	0	0	0	2100	2100	2100	2100	2100	2100	2100	2100	2100	2100	2100	2100	2100	2100	2100	2100	2100	2100	2100	2100	2100	2100	2100	2100
ArcelorMittal S.A.				ArcelorMittal Nippon Steel India Hazira Plant BF and BOF expansion (II)	India	ArcelorMittal SA [60%]; Nippon Steel Corp [40%]	0.6	8400	5040	8400				integrated (BF)	BF, BOF	announced	2029			2049	0	0	0	0	0	0	0	0	0	5040	5040	5040	5040	5040	5040	5040	5040	5040	5040	5040	5040	5040	5040	5040	5040	5040	5040	5040	5040
ArcelorMittal S.A.				ArcelorMittal Nippon Steel Paradip Steel Plant	India	ArcelorMittal SA [60%]; Nippon Steel Corp [40%]	0.6	7000	4200		N/A			integrated (BF)	BF, BOF	announced	2029				0	0	0	0	0	0	0	0	0	4200	4200	4200	4200	4200	4200	4200	4200	4200	4200	4200	4200	4200	4200	4200	4200	4200	4200	4200	4200
ArcelorMittal S.A.	SIT00003			ArcelorMittal Acciaierie d'Italia Taranto steel plant	Italy	ArcelorMittal SA [40%]; Acciaierie d'italia SpA [60%]	0.4	11500	4600	9500	11500	N/A	N/A	integrated (BF)	BF, BOF	operating	1965				4600	4600	4600	4600	0	0	0	0	0	0	0	0	0	0	0	0	0	0	0	0	0	0	0	0	0	0	0	0	0
ArcelorMittal S.A.	SIT00003	U001094	1	ArcelorMittal Acciaierie d'Italia Taranto steel plant	Italy	ArcelorMittal SA [40%]; Acciaierie d'italia SpA [60%]	0.4	2000	800	2000					BF	operating	1960	2015	N/A	2035	800	800	800	800	0	0	0	0	0	0	0	0	0	0	0	0	0	0	0	0	0	0	0	0	0	0	0	0	0
ArcelorMittal S.A.	SIT00003	U001095	2	ArcelorMittal Acciaierie d'Italia Taranto steel plant	Italy	ArcelorMittal SA [40%]; Acciaierie d'italia SpA [60%]	0.4	2000	800	2000					BF	operating	1960	2022	N/A	2042	800	800	800	800	0	0	0	0	0	0	0	0	0	0	0	0	0	0	0	0	0	0	0	0	0	0	0	0	0
ArcelorMittal S.A.	SIT00003	U001097	4	ArcelorMittal Acciaierie d'Italia Taranto steel plant	Italy	ArcelorMittal SA [40%]; Acciaierie d'italia SpA [60%]	0.4	2000	800	2000					BF	operating	1960	2022	N/A	2042	800	800	800	800	0	0	0	0	0	0	0	0	0	0	0	0	0	0	0	0	0	0	0	0	0	0	0	0	0
ArcelorMittal S.A.	SIT00003	U001340	5	ArcelorMittal Acciaierie d'Italia Taranto steel plant	Italy	ArcelorMittal SA [40%]; Acciaierie d'italia SpA [60%]	0.4	3500	1400	3500					BF	mothballed	November 1974	NA	N/A	2023	1400	1400	1400	1400	0	0	0	0	0	0	0	0	0	0	0	0	0	0	0	0	0	0	0	0	0	0	0	0	0
ArcelorMittal S.A.	SIT00003-1			ArcelorMittal Acciaierie d'Italia Taranto steel plant EAF expansion	Italy	ArcelorMittal SA [40%]; Acciaierie d'italia SpA [60%]	0.4	2500	1000	N/A		N/A	2500	electric	EAF	announced	2024
ArcelorMittal S.A.	SKZ00001			ArcelorMittal Temirtau steel plant	Kazakhstan	ArcelorMittal SA [100%]	1	6000	6000	5125	6000	N/A	N/A	integrated (BF)	BF, BOF	operating	1960				6000	6000	6000	6000	6000	6000	6000	6000	6000	6000	6000	6000	6000	6000	6000	6000	6000	6000	6000	6000	6000	6000	6000	6000	6000	6000	6000	6000	6000
ArcelorMittal S.A.	SKZ00001	U001143	2	ArcelorMittal Temirtau steel plant	Kazakhstan	ArcelorMittal SA [100%]	1	1300	1300	1300					BF	operating	April 2012	2012	N/A	2032	1300	1300	1300	1300	1300	1300	1300	1300	1300	1300	1300	1300	1300	1300	1300	1300	1300	1300	1300	1300	1300	1300	1300	1300	1300	1300	1300	1300	1300
ArcelorMittal S.A.	SKZ00001	U001144	3	ArcelorMittal Temirtau steel plant	Kazakhstan	ArcelorMittal SA [100%]	1	2300	2300	2300					BF	operating	February 2015	2021	N/A	2041	2300	2300	2300	2300	2300	2300	2300	2300	2300	2300	2300	2300	2300	2300	2300	2300	2300	2300	2300	2300	2300	2300	2300	2300	2300	2300	2300	2300	2300
ArcelorMittal S.A.	SKZ00001	U001145	4	ArcelorMittal Temirtau steel plant	Kazakhstan	ArcelorMittal SA [100%]	1	1525	1525	1525					BF	operating	November 2016	2016	N/A	2036	1525	1525	1525	1525	1525	1525	1525	1525	1525	1525	1525	1525	1525	1525	1525	1525	1525	1525	1525	1525	1525	1525	1525	1525	1525	1525	1525	1525	1525
ArcelorMittal S.A.	SLU00001			ArcelorMittal Differdange steel plant	Luxembourg	ArcelorMittal SA [100%]	1	2000	2000	N/A	N/A	N/A	2000	electric	EAF	operating	1896				2000	2000	2000	2000	2000	2000	2000	2000	2000	2000	2000	2000	2000	2000	2000	2000	2000	2000	2000	2000	2000	2000	2000	2000	2000	2000	2000	2000	2000
ArcelorMittal S.A.	SLU00002			ArcelorMittal Esch-Belval steel plant	Luxembourg	ArcelorMittal SA [100%]	1	1000	1000	N/A	N/A	N/A	1000	electric	EAF	operating	1911				1000	1000	1000	1000	1000	1250	1250	1250	1250	1250	1250	1250	1250	1250	1250	1250	1250	1250	1250	1250	1250	1250	1250	1250	1250	1250	1250	1250	1250
ArcelorMittal S.A.	SLU00002-1			ArcelorMittal Esch-Belval steel plant - EAF expansion	Luxembourg	ArcelorMittal SA [100%]	1	250	250	N/A		N/A	250	electric	EAF	construction	2025				0	0	0	0	0	250	250	250	250	250	250	250	250	250	250	250	250	250	250	250	250	250	250	250	250	250	250	250	250
ArcelorMittal S.A.	SMX00002			ArcelorMittal Lázaro Cárdenas steel plant	Mexico	ArcelorMittal SA [100%]	1	6400	6400	1451.91	2400	3200	4000	integrated (BF)	BF, BOF	operating	1976				2400	2400	2400	2400	2400	2400	2400	2400	2400	2400	2400	2400	2400	2400	2400	2400	2400	2400	2400	2400	2400	2400	2400	2400	2400	2400	2400	2400	2400
ArcelorMittal S.A.	SMX00002			ArcelorMittal Lázaro Cárdenas steel plant (DRI-EAF)	Mexico	ArcelorMittal SA [100%]	1					3200	4000	integrated (DRI)	DRI, EAF	operating					4000	4000	4000	4000	4000	4000	4000	4000	4000	4000	4000	4000	4000	4000	4000	4000	4000	4000	4000	4000	4000	4000	4000	4000	4000	4000	4000	4000	4000
ArcelorMittal S.A.	SMX00002	U001149	unknown	ArcelorMittal Lázaro Cárdenas steel plant	Mexico	ArcelorMittal SA [100%]	1	1451.91	1451.91	1451.91					BF	operating	1976	2019	N/A	2039	1451.91	1451.91	1451.91	1451.91	1451.91	1451.91	1451.91	1451.91	1451.91	1451.91	1451.91	1451.91	1451.91	1451.91	1451.91	1451.91	1451.91	1451.91	1451.91	1451.91	1451.91	1451.91	1451.91	1451.91	1451.91	1451.91	1451.91	1451.91	1451.91
ArcelorMittal S.A.	SMA00002			ArcelorMittal Sonasid Casablanca steel plant	Morocco	ArcelorMittal SA [100%]	1	800	800	N/A	N/A	N/A	800	electric	EAF	operating	2002				800	800	800	800	800	800	800	800	800	800	800	800	800	800	800	800	800	800	800	800	800	800	800	800	800	800	800	800	800
ArcelorMittal S.A.	SPL00001			ArcelorMittal Dąbrowa Górnicza steel plant	Poland	ArcelorMittal SA [100%]	1	5000	5000	4500	5000	N/A	N/A	integrated (BF)	BF, BOF	operating	unknown				5000	5000	5000	5000	5000	5000	5000	5000	5000	5000	5000	5000	5000	5000	5000	5000	5000	5000	5000	5000	5000	5000	5000	5000	5000	5000	5000	5000	5000
ArcelorMittal S.A.	SPL00001	U001165	2	ArcelorMittal Dąbrowa Górnicza steel plant	Poland	ArcelorMittal SA [100%]	1	2300	2300	2300					BF	operating	unknown	2023	N/A	2043	2300	2300	2300	2300	2300	2300	2300	2300	2300	2300	2300	2300	2300	2300	2300	2300	2300	2300	2300	2300	2300	2300	2300	2300	2300	2300	2300	2300	2300
ArcelorMittal S.A.	SPL00001	U001166	3	ArcelorMittal Dąbrowa Górnicza steel plant	Poland	ArcelorMittal SA [100%]	1	2200	2200	2200					BF	operating	unknown	NA	N/A	2023	2200	2200	2200	2200	2200	2200	2200	2200	2200	2200	2200	2200	2200	2200	2200	2200	2200	2200	2200	2200	2200	2200	2200	2200	2200	2200	2200	2200	2200
ArcelorMittal S.A.	SPL00006			ArcelorMittal Warszawa steel plant	Poland	ArcelorMittal SA [100%]	1	750	750	N/A	N/A	N/A	750	electric	EAF	operating	1957				750	750	750	750	750	750	750	750	750	750	750	750	750	750	750	750	750	750	750	750	750	750	750	750	750	750	750	750	750
ArcelorMittal S.A.	SRO00002			ArcelorMittal Hunedoara steel plant	Romania	ArcelorMittal Hunedoara SA [100%]	1	800	800	N/A	N/A	N/A	800	electric	EAF	operating	1884				800	800	800	800	800	800	800	800	800	800	800	800	800	800	800	800	800	800	800	800	800	800	800	800	800	800	800	800	800
ArcelorMittal S.A.	SZA00001			ArcelorMittal Newcastle Steel Works	South Africa	Arcelormittal South Africa Ltd [100%]	0.6922	1900	1315.18	2044	1900	N/A	N/A	integrated (BF)	BF, BOF	mothballed	1971				1315.18	1315.18	1315.18	1315.18	0	0	0	0	0	0	0	0	0	0	0	0	0	0	0	0	0	0	0	0	0	0	0	0	0
ArcelorMittal S.A.	SZA00001-1			ArcelorMittal Newcastle Steel Works transition (EAF addition)	South Africa	Arcelormittal South Africa Ltd [100%]	0.6922	1900	1315.18	N/A		N/A	1900	integrated (BF)	BF, BOF	announced	2034				0	0	0	0	0	0	0	0	0	0	0	0	0	0	0	0	0	0	0	0	0	0	0	0	0	0	0	0	0
ArcelorMittal S.A.	SZA00004			ArcelorMittal Saldanha Steel Works	South Africa	Arcelormittal South Africa Ltd [100%]	0.6922	800	553.76		N/A	800		integrated (DRI)	DRI	mothballed	1998				0	0	0	0	0	0	0	0	0	800	800	800	800	800	800	800	800	800	800	800	800	800	800	800	800	800	800	800	800
ArcelorMittal S.A.	SZA00002			ArcelorMittal Vanderbijlpark Steel Works	South Africa	Arcelormittal South Africa Ltd [100%]	0.6922	3400	2353.48	3200	3000	1020	400	integrated (BF)	BF, BOF, DRI, EAF	operating	1947				2353.48	2353.48	2353.48	2353.48	2353.48	2353.48	2353.48	2353.48	2353.48	2353.48	1176.74	1176.74	1176.74	1176.74	1176.74	1176.74	1176.74	1176.74	1176.74	1176.74	1176.74	1176.74	1176.74	1176.74	1176.74	1176.74	1176.74	1176.74	1176.74
ArcelorMittal S.A.	SZA00002			Dummy - ArcelorMittal Vanderbijlpark Steel Works transition (EAF addition)	South Africa	Arcelormittal South Africa Ltd [100%]	0.6922	1700	1176.74		N/A		1700	electric	EAF	announced	2030				0	0	0	0	0	0	0	0	0	0	1176.74	1176.74	1176.74	1176.74	1176.74	1176.74	1176.74	1176.74	1176.74	1176.74	1176.74	1176.74	1176.74	1176.74	1176.74	1176.74	1176.74	1176.74	1176.74
ArcelorMittal S.A.	SZA00001	U001346	N5	ArcelorMittal Vanderbijlpark Steel Works	South Africa	Arcelormittal South Africa Ltd [100%]	0.6922	2044	1414.86	2044					BF	operating	1974	2014	N/A	2034	1414.86	1414.86	1414.86	1414.86	1414.86	1414.86	1414.86	1414.86	1414.86	1414.86	1414.86	1414.86	1414.86	1414.86	1414.86	1414.86	1414.86	1414.86	1414.86	1414.86	1414.86	1414.86	1414.86	1414.86	1414.86	1414.86	1414.86	1414.86	1414.86
ArcelorMittal S.A.	SZA00002	U001306	C	ArcelorMittal Vanderbijlpark Steel Works	South Africa	Arcelormittal South Africa Ltd [100%]	0.6922	1300	899.86	1300					BF	operating	1996	2012	N/A	2032	899.86	899.86	899.86	899.86	899.86	899.86	899.86	899.86	899.86	899.86	0	0	0	0	0	0	0	0	0	0	0	0	0	0	0	0	0	0	0
ArcelorMittal S.A.	SZA00002-1			ArcelorMittal Vanderbijlpark Steel Works transition (EAF addition)	South Africa	Arcelormittal South Africa Ltd [100%]	0.6922	1700	1176.74				1700	electric	EAF	announced	2030
ArcelorMittal S.A.	SES00001			ArcelorMittal Asturias (Gijón) steel plant	Spain	ArcelorMittal SA [100%]	1	1200	1200	4200	1200	N/A	N/A	integrated (BF)	BF, BOF	operating	unknown				1200	1200	1200	1200	1200	1200	1200	1200	1200	0	0	0	0	0	0	0	0	0	0	0	0	0	0	0	0	0	0	0	0
				Dummy - ArcelorMittal Asturias (Gijón) steel plant EAF expansion	Spain								1100	electric	EAF	construction	2026				0	0	0	0	0	0	1100	1100	1100	0	0	0	0	0	0	0	0	0	0	0	0	0	0	0	0	0	0	0	0
				Dummy - ArcelorMittal Asturias (Gijón) steel plant DRI expansion	Spain							2300		integrated (DRI)	DRI, EAF	announced					0	0	0	0	0	0	0	0	0	2300	2300	2300	2300	2300	2300	2300	2300	2300	2300	2300	2300	2300	2300	2300	2300	2300	2300	2300	2300
ArcelorMittal S.A.	SES00001	U000985	A	ArcelorMittal Asturias (Gijón) steel plant	Spain	ArcelorMittal SA [100%]	1	2700	2700	2700					BF	mothballed	unknown	NA	N/A	2023	2700	2700	2700	2700	2700	2700	2700	2700	2700	2700	2700	2700	2700	2700	2700	2700	2700	2700	2700	2700	2700	2700	2700	2700	2700	2700	2700	2700	2700
ArcelorMittal S.A.	SES00001	U000986	B	ArcelorMittal Asturias (Gijón) steel plant	Spain	ArcelorMittal SA [100%]	1	1500	1500	1500					BF	operating	unknown	NA	N/A	2023	1500	1500	1500	1500	1500	1500	1500	1500	1500	1500	1500	1500	1500	1500	1500	1500	1500	1500	1500	1500	1500	1500	1500	1500	1500	1500	1500	1500	1500
ArcelorMittal S.A.	SES00001-1			ArcelorMittal Asturias (Gijón) steel plant DRI and EAF expansion	Spain	ArcelorMittal SA [100%]	1	1100	1100	N/A		2300	1100	integrated (DRI)	DRI, EAF	construction	2025				0	0	0	0	0	0	1100	1100	1100	1100	1100	1100	1100	1100	1100	1100	1100	1100	1100	1100	1100	1100	1100	1100	1100	1100	1100	1100	1100
ArcelorMittal S.A.	SES00007			ArcelorMittal Olaberria-Bergara (Olaberria) steel plant	Spain	ArcelorMittal SA [100%]	1	1450	1450	N/A	N/A	N/A	1450	electric	EAF	operating	1992				1450	1450	1450	1450	1450	1450	1450	1450	1450	1450	1450	1450	1450	1450	1450	1450	1450	1450	1450	1450	1450	1450	1450	1450	1450	1450	1450	1450	1450
ArcelorMittal S.A.	SES00008			ArcelorMittal Asturias (Avilés) steel plant	Spain	ArcelorMittal SA [100%]	1	4200	4200	N/A	4200	N/A	N/A	oxygen	BOF	operating	unknown				4200	4200	4200	4200	4200	4200	4200	4200	4200	2100	2100	2100	2100	2100	2100	2100	2100	2100	2100	2100	2100	2100	2100	2100	2100	2100	2100	2100	2100
ArcelorMittal S.A.	SES00002			ArcelorMittal Sestao steel plant (Bilbao)	Spain	ArcelorMittal SA [100%]	1	2000	2000	N/A	N/A	N/A	2000	electric	EAF	operating	unknown				2000	2000	2000	2000	2000	2000	2000	2000	2000	1000	1000	1000	1000	1000	1000	1000	1000	1000	1000	1000	1000	1000	1000	1000	1000	1000	1000	1000	1000
ArcelorMittal S.A.	SUA00002			ArcelorMittal Kryvyi Rih steel plant	Ukraine	ArcelorMittal SA [100%]	1	8000	8000	11450	6500	N/A	N/A	integrated (BF)	BF, BOF, OHF	operating	1934				8000	8000	2400	2400	2400	2400	2400	2400	2400	2400	2400	2400	2400	2400	2400	2400	2400	2400	2400	2400	2400	2400	2400	2400	2400	2400	2400	2400	2400
ArcelorMittal S.A.	SUA00002	U001241	5	ArcelorMittal Kryvyi Rih steel plant	Ukraine	ArcelorMittal SA [100%]	1	1681	1681	1681					BF	mothballed	1960	2002	unknown	2022	1681	1681	1681	1681	1681	1681	1681	1681	1681	1681	1681	1681	1681	1681	1681	1681	1681	1681	1681	1681	1681	1681	1681	1681	1681	1681	1681	1681	1681
ArcelorMittal S.A.	SUA00002	U001242	6	ArcelorMittal Kryvyi Rih steel plant	Ukraine	ArcelorMittal SA [100%]	1	1360	1360	1360					BF	operating	October 2000	2015	unknown	2035	1360	1360	1360	1360	1360	1360	1360	1360	1360	1360	1360	1360	1360	1360	1360	1360	1360	1360	1360	1360	1360	1360	1360	1360	1360	1360	1360	1360	1360
ArcelorMittal S.A.	SUA00002	U001243	7	ArcelorMittal Kryvyi Rih steel plant	Ukraine	ArcelorMittal SA [100%]	1	1270	1270	1270					BF	mothballed	1962	2020	unknown	2040	1270	1270	1270	1270	1270	1270	1270	1270	1270	1270	1270	1270	1270	1270	1270	1270	1270	1270	1270	1270	1270	1270	1270	1270	1270	1270	1270	1270	1270
ArcelorMittal S.A.	SUA00002	U001244	8	ArcelorMittal Kryvyi Rih steel plant	Ukraine	ArcelorMittal SA [100%]	1	2258.27	2258.27	2258.27					BF	mothballed	1970	2008	unknown	2028	2258.27	2258.27	2258.27	2258.27	2258.27	2258.27	2258.27	2258.27	2258.27	2258.27	2258.27	2258.27	2258.27	2258.27	2258.27	2258.27	2258.27	2258.27	2258.27	2258.27	2258.27	2258.27	2258.27	2258.27	2258.27	2258.27	2258.27	2258.27	2258.27
ArcelorMittal S.A.	SUA00002	U001245	9	ArcelorMittal Kryvyi Rih steel plant	Ukraine	ArcelorMittal SA [100%]	1	4000	4000	4000					BF	mothballed	December 1974	2023	March 2022	2043	4000	4000	4000	4000	4000	4000	4000	4000	4000	4000	4000	4000	4000	4000	4000	4000	4000	4000	4000	4000	4000	4000	4000	4000	4000	4000	4000	4000	4000
ArcelorMittal S.A.	SUS00081			AM/NS Calvert LLC	United States	ArcelorMittal SA [50%]; Nippon Steel Corp [50%]	0.5	1500	750	N/A	N/A	N/A	1500	electric	EAF	operating	2023				0	0	0	750	750	750	750	750	750	750	750	750	750	750	750	750	750	750	750	750	750	750	750	750	750	750	750	750	750
ArcelorMittal S.A.	SUS00053			ArcelorMittal Texas DRI plant	United States	ArcelorMittal SA [80%]; voestalpine AG [20%]	0.8	N/A	1600	N/A	N/A	2000	N/A	ironmaking (DRI)	DRI	operating	2017				0	0	1600	1600	1600	1600	1600	1600	1600	1600	1600	1600	1600	1600	1600	1600	1600	1600	1600	1600	1600	1600	1600	1600	1600	1600	1600	1600	1600
Capacity projection by main production process
Integrated (BF) (including BOF only plants)																					72730.5	72730.5	67130.5	70130.5	64215.3	68415.3	68415.3	63330.8	69330.8	73970.8	65944.1	63944.1	63944.1	63944.1	63944.1	63944.1	63944.1	63944.1	63944.1	63944.1	63944.1	63944.1	63944.1	63944.1	63944.1	63944.1	63944.1	63944.1	63944.1
Electric (scrap-EAF)																					13740	13740	13740	14490	14490	14740	15840	17840	17840	16740	17916.7	17916.7	17916.7	17916.7	17916.7	17916.7	17916.7	17916.7	17916.7	17916.7	17916.7	17916.7	17916.7	17916.7	17916.7	17916.7	17916.7	17916.7	17916.7
integrated (DRI) (including ironmaking DRI only)																					13448	13448	15048	15048	15048	15048	15148	17648	20048	23148	29748	29748	29748	29748	29748	29748	29748	29748	29748	29748	29748	29748	29748	29748	29748	29748	29748	29748	29748
integrated (BF-EAF)																					1584	1584	1584	1584	1584	1584	2584	2584	2584	2584	2584	2584	2584	2584	2584	2584	2584	2584	2584	2584	2584	2584	2584	2584	2584	2584	2584	2584	2584
Total nominal crude steel production capacity																					101502	101502	97502.5	101252	95337.3	99787.3	101987	101403	109803	116443	116193	114193	114193	114193	114193	114193	114193	114193	114193	114193	114193	114193	114193	114193	114193	114193	114193	114193	114193
Disclosed nominal crude steel capacity																					85500	82700	82100	80984
Capacity utilization
ArcelorMittal S.A.	SAR00001			ArcelorMittal Acindar Villa Constitución steel plant	Argentina	ArcelorMittal SA [100%]	1	1750	1750	N/A		600	1750	integrated (DRI)	DRI, EAF	operating					0.704682	0.680387	0.605123	0.573487	0.64092	0.64092	0.64092	0.64092	0.64092	0.64092	0.64092	0.64092	0.64092	0.64092	0.64092	0.64092	0.64092	0.64092	0.64092	0.64092	0.64092	0.64092	0.64092	0.64092	0.64092	0.64092	0.64092	0.64092	0.64092
ArcelorMittal S.A.	SBE00001			ArcelorMittal Gent steel plant	Belgium	ArcelorMittal SA [100%]	1	5000	5000	5000		N/A	N/A	integrated (BF)	BF, BOF	operating					0.704682	0.680387	0.605123	0.573487	0.64092	0.64092	0.64092	0.64092	0.64092	0.64092	0.64092	0.64092	0.64092	0.64092	0.64092	0.64092	0.64092	0.64092	0.64092	0.64092	0.64092	0.64092	0.64092	0.64092	0.64092	0.64092	0.64092	0.64092	0.64092
ArcelorMittal S.A.	SBE00001-1			Dummy - ArcelorMittal Gent steel plant (DRI-EAF addition)	Belgium	ArcelorMittal SA [100%]	1	2500	2500	N/A		2500	2500	integrated (DRI)	DRI, EAF	announced					0.704682	0.680387	0.605123	0.573487	0.64092	0.64092	0.64092	0.64092	0.64092	0.64092	0.64092	0.64092	0.64092	0.64092	0.64092	0.64092	0.64092	0.64092	0.64092	0.64092	0.64092	0.64092	0.64092	0.64092	0.64092	0.64092	0.64092	0.64092	0.64092
ArcelorMittal S.A.	SBA00001			ArcelorMittal Zenica steel plant	Bosnia and Herzegovina	ArcelorMittal SA [100%]	1	1940	1940	1100	1140	N/A	800	integrated (BF)	BF, BOF, EAF	operating					0.704682	0.680387	0.605123	0.573487	0.64092	0.64092	0.64092	0.64092	0.64092	0.64092	0.64092	0.64092	0.64092	0.64092	0.64092	0.64092	0.64092	0.64092	0.64092	0.64092	0.64092	0.64092	0.64092	0.64092	0.64092	0.64092	0.64092	0.64092	0.64092
ArcelorMittal S.A.	SBA00001			ArcelorMittal Zenica steel plant (scrap-EAF)	Bosnia and Herzegovina	ArcelorMittal SA [100%]	1						800	electric	EAF	operating					0.704682	0.680387	0.605123	0.573487	0.64092	0.64092	0.64092	0.64092	0.64092	0.64092	0.64092	0.64092	0.64092	0.64092	0.64092	0.64092	0.64092	0.64092	0.64092	0.64092	0.64092	0.64092	0.64092	0.64092	0.64092	0.64092	0.64092	0.64092	0.64092
ArcelorMittal S.A.	SBR00018			ArcelorMittal Barra Mansa steel plant	Brazil	ArcelorMittal SA [100%]	1	800	800	N/A		N/A	800	electric	EAF	operating					0.704682	0.680387	0.605123	0.573487	0.64092	0.64092	0.64092	0.64092	0.64092	0.64092	0.64092	0.64092	0.64092	0.64092	0.64092	0.64092	0.64092	0.64092	0.64092	0.64092	0.64092	0.64092	0.64092	0.64092	0.64092	0.64092	0.64092	0.64092	0.64092
ArcelorMittal S.A.	SBR00013			ArcelorMittal Juiz de Fora steel plant	Brazil	ArcelorMittal SA [100%]	1	1100	1100	360	N/A	N/A	1100	integrated (BF-EAF)	BF, EAF	operating					0.704682	0.680387	0.605123	0.573487	0.64092	0.64092	0.64092	0.64092	0.64092	0.64092	0.64092	0.64092	0.64092	0.64092	0.64092	0.64092	0.64092	0.64092	0.64092	0.64092	0.64092	0.64092	0.64092	0.64092	0.64092	0.64092	0.64092	0.64092	0.64092
ArcelorMittal S.A.	SBR00013			ArcelorMittal Juiz de Fora steel plant (scrap-EAF)	Brazil	ArcelorMittal SA [100%]	1						1100	electric	EAF	operating					0.704682	0.680387	0.605123	0.573487	0.64092	0.64092	0.64092	0.64092	0.64092	0.64092	0.64092	0.64092	0.64092	0.64092	0.64092	0.64092	0.64092	0.64092	0.64092	0.64092	0.64092	0.64092	0.64092	0.64092	0.64092	0.64092	0.64092	0.64092	0.64092
ArcelorMittal S.A.	SBR00003			ArcelorMittal Monlevade steel plant	Brazil	ArcelorMittal SA [100%]	1	1200	1200	1040		N/A	N/A	integrated (BF)	BF, BOF	operating					0.704682	0.680387	0.605123	0.573487	0.64092	0.64092	0.64092	0.64092	0.64092	0.64092	0.64092	0.64092	0.64092	0.64092	0.64092	0.64092	0.64092	0.64092	0.64092	0.64092	0.64092	0.64092	0.64092	0.64092	0.64092	0.64092	0.64092	0.64092	0.64092
ArcelorMittal S.A.	SBR00003			Dummy - ArcelorMittal Monlevade steel plant (BF-EAF)	Brazil	ArcelorMittal SA [100%]	1			1200			1000	integrated (BF-EAF)	BF, EAF	construction					0.704682	0.680387	0.605123	0.573487	0.64092	0.64092	0.64092	0.64092	0.64092	0.64092	0.64092	0.64092	0.64092	0.64092	0.64092	0.64092	0.64092	0.64092	0.64092	0.64092	0.64092	0.64092	0.64092	0.64092	0.64092	0.64092	0.64092	0.64092	0.64092
ArcelorMittal S.A.	SBR00008			ArcelorMittal Pecém steel plant	Brazil	ArcelorMittal SA [100%]	1	3000	3000	3192		N/A	N/A	integrated (BF)	BF, BOF	operating					0.704682	0.680387	0.605123	0.573487	0.64092	0.64092	0.64092	0.64092	0.64092	0.64092	0.64092	0.64092	0.64092	0.64092	0.64092	0.64092	0.64092	0.64092	0.64092	0.64092	0.64092	0.64092	0.64092	0.64092	0.64092	0.64092	0.64092	0.64092	0.64092
ArcelorMittal S.A.	SBR00009			ArcelorMittal Piracicaba steel plant	Brazil	ArcelorMittal SA [100%]	1	1100	1100	N/A		N/A	1100	electric	EAF	operating					0.704682	0.680387	0.605123	0.573487	0.64092	0.64092	0.64092	0.64092	0.64092	0.64092	0.64092	0.64092	0.64092	0.64092	0.64092	0.64092	0.64092	0.64092	0.64092	0.64092	0.64092	0.64092	0.64092	0.64092	0.64092	0.64092	0.64092	0.64092	0.64092
ArcelorMittal S.A.	SBR00004			ArcelorMittal Resende steel plant	Brazil	ArcelorMittal SA [100%]	1	1000	1000	N/A		N/A	1000	electric	EAF	operating					0.704682	0.680387	0.605123	0.573487	0.64092	0.64092	0.64092	0.64092	0.64092	0.64092	0.64092	0.64092	0.64092	0.64092	0.64092	0.64092	0.64092	0.64092	0.64092	0.64092	0.64092	0.64092	0.64092	0.64092	0.64092	0.64092	0.64092	0.64092	0.64092
ArcelorMittal S.A.	SBR00002			ArcelorMittal Tubarão steel plant	Brazil	ArcelorMittal SA [100%]	1	7500	7500	7280		N/A	N/A	integrated (BF)	BF, BOF	operating					0.704682	0.680387	0.605123	0.573487	0.64092	0.64092	0.64092	0.64092	0.64092	0.64092	0.64092	0.64092	0.64092	0.64092	0.64092	0.64092	0.64092	0.64092	0.64092	0.64092	0.64092	0.64092	0.64092	0.64092	0.64092	0.64092	0.64092	0.64092	0.64092
ArcelorMittal S.A.	SCA00002			ArcelorMittal Dofasco steel plant	Canada	ArcelorMittal SA [100%]	1	4050	4050	3024		N/A	1350	integrated (BF)	BF, BOF, EAF	operating					0.704682	0.680387	0.605123	0.573487	0.64092	0.64092	0.64092	0.64092	0.64092	0.64092	0.64092	0.64092	0.64092	0.64092	0.64092	0.64092	0.64092	0.64092	0.64092	0.64092	0.64092	0.64092	0.64092	0.64092	0.64092	0.64092	0.64092	0.64092	0.64092
ArcelorMittal S.A.	SCA00002			Dummy - ArcelorMittal Dofasco steel plant transition (DRI-EAF addition)	Canada	ArcelorMittal SA [100%]	1	2400	2400	N/A		2649	2400	integrated (DRI)	DRI, EAF	announced					0.704682	0.680387	0.605123	0.573487	0.64092	0.64092	0.64092	0.64092	0.64092	0.64092	0.64092	0.64092	0.64092	0.64092	0.64092	0.64092	0.64092	0.64092	0.64092	0.64092	0.64092	0.64092	0.64092	0.64092	0.64092	0.64092	0.64092	0.64092	0.64092
ArcelorMittal S.A.	SCA00001			ArcelorMittal Montreal steel plant	Canada	ArcelorMittal SA [100%]	1	2400	2400	N/A		1000	2400	integrated (DRI)	DRI, EAF	operating					0.704682	0.680387	0.605123	0.573487	0.64092	0.64092	0.64092	0.64092	0.64092	0.64092	0.64092	0.64092	0.64092	0.64092	0.64092	0.64092	0.64092	0.64092	0.64092	0.64092	0.64092	0.64092	0.64092	0.64092	0.64092	0.64092	0.64092	0.64092	0.64092
ArcelorMittal S.A.	SFR00001			ArcelorMittal Dunkerque steel plant	France	ArcelorMittal SA [100%]	1	6750	6750	6900		N/A	N/A	integrated (BF)	BF, BOF	operating					0.704682	0.680387	0.605123	0.573487	0.64092	0.64092	0.64092	0.64092	0.64092	0.64092	0.64092	0.64092	0.64092	0.64092	0.64092	0.64092	0.64092	0.64092	0.64092	0.64092	0.64092	0.64092	0.64092	0.64092	0.64092	0.64092	0.64092	0.64092	0.64092
ArcelorMittal S.A.	SFR00001			ArcelorMittal Dunkerque steel plant (scrap-EAF)	France	ArcelorMittal SA [100%]	1							electric	EAF	announced					0.704682	0.680387	0.605123	0.573487	0.64092	0.64092	0.64092	0.64092	0.64092	0.64092	0.64092	0.64092	0.64092	0.64092	0.64092	0.64092	0.64092	0.64092	0.64092	0.64092	0.64092	0.64092	0.64092	0.64092	0.64092	0.64092	0.64092	0.64092	0.64092
ArcelorMittal S.A.	SFR00001-1			Dummy - ArcelorMittal Dunkerque steel plant transition (DRI and EAF addition)	France	ArcelorMittal SA [100%]	1	4500	4500	N/A		2500	4500	integrated (DRI)	DRI, EAF	announced					0.704682	0.680387	0.605123	0.573487	0.64092	0.64092	0.64092	0.64092	0.64092	0.64092	0.64092	0.64092	0.64092	0.64092	0.64092	0.64092	0.64092	0.64092	0.64092	0.64092	0.64092	0.64092	0.64092	0.64092	0.64092	0.64092	0.64092	0.64092	0.64092
ArcelorMittal S.A.	SFR00002			ArcelorMittal Méditerranée Fos sur Mer steel plant	France	ArcelorMittal SA [100%]	1	4000	4000	4000		N/A	N/A	integrated (BF)	BF, BOF	operating					0.704682	0.680387	0.605123	0.573487	0.64092	0.64092	0.64092	0.64092	0.64092	0.64092	0.64092	0.64092	0.64092	0.64092	0.64092	0.64092	0.64092	0.64092	0.64092	0.64092	0.64092	0.64092	0.64092	0.64092	0.64092	0.64092	0.64092	0.64092	0.64092
ArcelorMittal S.A.	SFR00002-1			Dummy - ArcelorMittal Méditerranée Fos sur Mer steel plant transition (EAF addition)	France	ArcelorMittal SA [100%]	1	2000	2000	N/A		N/A	2000	electric	EAF	announced					0.704682	0.680387	0.605123	0.573487	0.64092	0.64092	0.64092	0.64092	0.64092	0.64092	0.64092	0.64092	0.64092	0.64092	0.64092	0.64092	0.64092	0.64092	0.64092	0.64092	0.64092	0.64092	0.64092	0.64092	0.64092	0.64092	0.64092	0.64092	0.64092
ArcelorMittal S.A.	SDE00003			AG der Dillinger Hüttenwerke Dillingen steel plant	Germany	SHS Stahl Holding Saar GmbH & Co KgaA [57.2%]; ArcelorMittal SA [33.4%]; Saarstahl AG [9.4%]	0.334	2760	921.84	4790		N/A	N/A	integrated (BF)	BF, BOF	operating					0.704682	0.680387	0.605123	0.573487	0.64092	0.64092	0.64092	0.64092	0.64092	0.64092	0.64092	0.64092	0.64092	0.64092	0.64092	0.64092	0.64092	0.64092	0.64092	0.64092	0.64092	0.64092	0.64092	0.64092	0.64092	0.64092	0.64092	0.64092	0.64092
ArcelorMittal S.A.	SDE00003-1			Dummy - AG der Dillinger Hüttenwerke Dillingen steel plant transition (DRI-EAF addition)	Germany	SHS Stahl Holding Saar GmbH & Co KgaA [57.2%]; ArcelorMittal SA [33.4%]; Saarstahl AG [9.4%]	0.334	1750	584.5	N/A		2500	1750	integrated (DRI)	DRI, EAF	announced					0.704682	0.680387	0.605123	0.573487	0.64092	0.64092	0.64092	0.64092	0.64092	0.64092	0.64092	0.64092	0.64092	0.64092	0.64092	0.64092	0.64092	0.64092	0.64092	0.64092	0.64092	0.64092	0.64092	0.64092	0.64092	0.64092	0.64092	0.64092	0.64092
ArcelorMittal S.A.	SDE00006			ArcelorMittal Bremen steel plant	Germany	ArcelorMittal SA [100%]	1	3800	3800	3800		N/A	N/A	integrated (BF)	BF, BOF	operating					0.704682	0.680387	0.605123	0.573487	0.64092	0.64092	0.64092	0.64092	0.64092	0.64092	0.64092	0.64092	0.64092	0.64092	0.64092	0.64092	0.64092	0.64092	0.64092	0.64092	0.64092	0.64092	0.64092	0.64092	0.64092	0.64092	0.64092	0.64092	0.64092
ArcelorMittal S.A.	SDE00006-1			Dummy - ArcelorMittal Bremen steel plant transition (DRI-EAF addition)	Germany	ArcelorMittal SA [100%]	1	1750	1750	N/A		2000	1750	integrated (DRI)	DRI, EAF	announced					0.704682	0.680387	0.605123	0.573487	0.64092	0.64092	0.64092	0.64092	0.64092	0.64092	0.64092	0.64092	0.64092	0.64092	0.64092	0.64092	0.64092	0.64092	0.64092	0.64092	0.64092	0.64092	0.64092	0.64092	0.64092	0.64092	0.64092	0.64092	0.64092
ArcelorMittal S.A.	SDE00008			ArcelorMittal Duisburg steel plant	Germany	ArcelorMittal SA [100%]	1	1300	1300	N/A		N/A	N/A	oxygen	BOF	operating					0.704682	0.680387	0.605123	0.573487	0.64092	0.64092	0.64092	0.64092	0.64092	0.64092	0.64092	0.64092	0.64092	0.64092	0.64092	0.64092	0.64092	0.64092	0.64092	0.64092	0.64092	0.64092	0.64092	0.64092	0.64092	0.64092	0.64092	0.64092	0.64092
ArcelorMittal S.A.	SDE00008-1			Dummy - ArcelorMittal Duisburg steel plant transition (EAF addition)	Germany	ArcelorMittal SA [100%]	1	1300	1300	N/A		N/A	1300	electric	EAF	announced					0.704682	0.680387	0.605123	0.573487	0.64092	0.64092	0.64092	0.64092	0.64092	0.64092	0.64092	0.64092	0.64092	0.64092	0.64092	0.64092	0.64092	0.64092	0.64092	0.64092	0.64092	0.64092	0.64092	0.64092	0.64092	0.64092	0.64092	0.64092	0.64092
ArcelorMittal S.A.	SDE00005			ArcelorMittal Eisenhüttenstadt steel plant	Germany	ArcelorMittal SA [100%]	1	2400	2400	1825		N/A	N/A	integrated (BF)	BF, BOF	operating					0.704682	0.680387	0.605123	0.573487	0.64092	0.64092	0.64092	0.64092	0.64092	0.64092	0.64092	0.64092	0.64092	0.64092	0.64092	0.64092	0.64092	0.64092	0.64092	0.64092	0.64092	0.64092	0.64092	0.64092	0.64092	0.64092	0.64092	0.64092	0.64092
ArcelorMittal S.A.	SDE00005-1			Dummy - ArcelorMittal Eisenhüttenstadt steel plant transition (DRI-EAF addition)	Germany	ArcelorMittal SA [100%]	1	1750	1750	N/A		>0	1750	integrated (DRI)	DRI, EAF	announced					0.704682	0.680387	0.605123	0.573487	0.64092	0.64092	0.64092	0.64092	0.64092	0.64092	0.64092	0.64092	0.64092	0.64092	0.64092	0.64092	0.64092	0.64092	0.64092	0.64092	0.64092	0.64092	0.64092	0.64092	0.64092	0.64092	0.64092	0.64092	0.64092
ArcelorMittal S.A.	SDE00007			ArcelorMittal Hamburg steel plant	Germany	ArcelorMittal SA [100%]	1	1100	1100	N/A		600	1100	integrated (DRI)	DRI, EAF	operating					0.704682	0.680387	0.605123	0.573487	0.64092	0.64092	0.64092	0.64092	0.64092	0.64092	0.64092	0.64092	0.64092	0.64092	0.64092	0.64092	0.64092	0.64092	0.64092	0.64092	0.64092	0.64092	0.64092	0.64092	0.64092	0.64092	0.64092	0.64092	0.64092
ArcelorMittal S.A.	SDE00007			ArcelorMittal Hamburg steel plant (scrap-EAF)	Germany	ArcelorMittal SA [100%]	1						1100	electric	EAF	operating					0.704682	0.680387	0.605123	0.573487	0.64092	0.64092	0.64092	0.64092	0.64092	0.64092	0.64092	0.64092	0.64092	0.64092	0.64092	0.64092	0.64092	0.64092	0.64092	0.64092	0.64092	0.64092	0.64092	0.64092	0.64092	0.64092	0.64092	0.64092	0.64092
ArcelorMittal S.A.	SIN00066			ArcelorMittal Nippon Steel Kendrapara plant	India	ArcelorMittal SA [60%]; Nippon Steel Corp [40%]	0.6	14000	8400	unknown		unknown	N/A	oxygen	BOF	announced					0.704682	0.680387	0.605123	0.573487	0.64092	0.64092	0.64092	0.64092	0.64092	0.64092	0.64092	0.64092	0.64092	0.64092	0.64092	0.64092	0.64092	0.64092	0.64092	0.64092	0.64092	0.64092	0.64092	0.64092	0.64092	0.64092	0.64092	0.64092	0.64092
ArcelorMittal S.A.	SIN00004			ArcelorMittal Nippon Steel India Hazira Plant	India	ArcelorMittal SA [60%]; Nippon Steel Corp [40%]	0.6	9600	5760	2040		7830	9600	integrated (BF-EAF)	BF, DRI, EAF	operating					0.704682	0.680387	0.605123	0.573487	0.64092	0.64092	0.64092	0.64092	0.64092	0.64092	0.64092	0.64092	0.64092	0.64092	0.64092	0.64092	0.64092	0.64092	0.64092	0.64092	0.64092	0.64092	0.64092	0.64092	0.64092	0.64092	0.64092	0.64092	0.64092
ArcelorMittal S.A.	SIN00004			ArcelorMittal Nippon Steel India Hazira Plant	India	ArcelorMittal SA [60%]; Nippon Steel Corp [40%]	0.6					7830		integrated (DRI)	DRI, EAF	operating					0.704682	0.680387	0.605123	0.573487	0.64092	0.64092	0.64092	0.64092	0.64092	0.64092	0.64092	0.64092	0.64092	0.64092	0.64092	0.64092	0.64092	0.64092	0.64092	0.64092	0.64092	0.64092	0.64092	0.64092	0.64092	0.64092	0.64092	0.64092	0.64092
ArcelorMittal S.A.	SIN00004			ArcelorMittal Nippon Steel India Hazira Plant	India	ArcelorMittal SA [60%]; Nippon Steel Corp [40%]	0.6				6000			integrated (BF)	BF, BOF	construction					0.704682	0.680387	0.605123	0.573487	0.64092	0.64092	0.64092	0.64092	0.64092	0.64092	0.64092	0.64092	0.64092	0.64092	0.64092	0.64092	0.64092	0.64092	0.64092	0.64092	0.64092	0.64092	0.64092	0.64092	0.64092	0.64092	0.64092	0.64092	0.64092
ArcelorMittal S.A.				ArcelorMittal Nippon Steel Paradip Steel Plant	India	ArcelorMittal SA [60%]; Nippon Steel Corp [40%]	0.6	7000	4200					integrated (BF)	BF, BOF	announced					0.704682	0.680387	0.605123	0.573487	0.64092	0.64092	0.64092	0.64092	0.64092	0.64092	0.64092	0.64092	0.64092	0.64092	0.64092	0.64092	0.64092	0.64092	0.64092	0.64092	0.64092	0.64092	0.64092	0.64092	0.64092	0.64092	0.64092	0.64092	0.64092
ArcelorMittal S.A.	SIT00003			ArcelorMittal Acciaierie d'Italia Taranto steel plant	Italy	ArcelorMittal SA [40%]; Acciaierie d'italia SpA [60%]	0.4	11500	4600	9500		N/A	N/A	integrated (BF)	BF, BOF	operating					0.704682	0.680387	0.605123	0.573487	0.64092	0.64092	0.64092	0.64092	0.64092	0.64092	0.64092	0.64092	0.64092	0.64092	0.64092	0.64092	0.64092	0.64092	0.64092	0.64092	0.64092	0.64092	0.64092	0.64092	0.64092	0.64092	0.64092	0.64092	0.64092
ArcelorMittal S.A.	SKZ00001			ArcelorMittal Temirtau steel plant	Kazakhstan	ArcelorMittal SA [100%]	1	6000	6000	5125		N/A	N/A	integrated (BF)	BF, BOF	operating					0.704682	0.680387	0.605123	0.573487	0.64092	0.64092	0.64092	0.64092	0.64092	0.64092	0.64092	0.64092	0.64092	0.64092	0.64092	0.64092	0.64092	0.64092	0.64092	0.64092	0.64092	0.64092	0.64092	0.64092	0.64092	0.64092	0.64092	0.64092	0.64092
ArcelorMittal S.A.	SLU00001			ArcelorMittal Differdange steel plant	Luxembourg	ArcelorMittal SA [100%]	1	2000	2000	N/A		N/A	2000	electric	EAF	operating					0.704682	0.680387	0.605123	0.573487	0.64092	0.64092	0.64092	0.64092	0.64092	0.64092	0.64092	0.64092	0.64092	0.64092	0.64092	0.64092	0.64092	0.64092	0.64092	0.64092	0.64092	0.64092	0.64092	0.64092	0.64092	0.64092	0.64092	0.64092	0.64092
ArcelorMittal S.A.	SLU00002			ArcelorMittal Esch-Belval steel plant	Luxembourg	ArcelorMittal SA [100%]	1	1000	1000	N/A		N/A	1000	electric	EAF	operating					0.704682	0.680387	0.605123	0.573487	0.64092	0.64092	0.64092	0.64092	0.64092	0.64092	0.64092	0.64092	0.64092	0.64092	0.64092	0.64092	0.64092	0.64092	0.64092	0.64092	0.64092	0.64092	0.64092	0.64092	0.64092	0.64092	0.64092	0.64092	0.64092
ArcelorMittal S.A.	SMX00002			ArcelorMittal Lázaro Cárdenas steel plant	Mexico	ArcelorMittal SA [100%]	1	6400	6400	1451.91	2400	3200	4000	integrated (BF)	BF, BOF	operating					0.704682	0.680387	0.605123	0.573487	0.64092	0.64092	0.64092	0.64092	0.64092	0.64092	0.64092	0.64092	0.64092	0.64092	0.64092	0.64092	0.64092	0.64092	0.64092	0.64092	0.64092	0.64092	0.64092	0.64092	0.64092	0.64092	0.64092	0.64092	0.64092
ArcelorMittal S.A.	SMX00002			ArcelorMittal Lázaro Cárdenas steel plant (DRI-EAF)	Mexico	ArcelorMittal SA [100%]	1					3200	4000	integrated (DRI)	DRI, EAF	operating					0.704682	0.680387	0.605123	0.573487	0.64092	0.64092	0.64092	0.64092	0.64092	0.64092	0.64092	0.64092	0.64092	0.64092	0.64092	0.64092	0.64092	0.64092	0.64092	0.64092	0.64092	0.64092	0.64092	0.64092	0.64092	0.64092	0.64092	0.64092	0.64092
ArcelorMittal S.A.	SMA00002			ArcelorMittal Sonasid Casablanca steel plant	Morocco	ArcelorMittal SA [100%]	1	800	800	N/A		N/A	800	electric	EAF	operating					0.704682	0.680387	0.605123	0.573487	0.64092	0.64092	0.64092	0.64092	0.64092	0.64092	0.64092	0.64092	0.64092	0.64092	0.64092	0.64092	0.64092	0.64092	0.64092	0.64092	0.64092	0.64092	0.64092	0.64092	0.64092	0.64092	0.64092	0.64092	0.64092
ArcelorMittal S.A.	SPL00001			ArcelorMittal Dąbrowa Górnicza steel plant	Poland	ArcelorMittal SA [100%]	1	5000	5000	4500		N/A	N/A	integrated (BF)	BF, BOF	operating					0.704682	0.680387	0.605123	0.573487	0.64092	0.64092	0.64092	0.64092	0.64092	0.64092	0.64092	0.64092	0.64092	0.64092	0.64092	0.64092	0.64092	0.64092	0.64092	0.64092	0.64092	0.64092	0.64092	0.64092	0.64092	0.64092	0.64092	0.64092	0.64092
ArcelorMittal S.A.	SPL00006			ArcelorMittal Warszawa steel plant	Poland	ArcelorMittal SA [100%]	1	750	750	N/A		N/A	750	electric	EAF	operating					0.704682	0.680387	0.605123	0.573487	0.64092	0.64092	0.64092	0.64092	0.64092	0.64092	0.64092	0.64092	0.64092	0.64092	0.64092	0.64092	0.64092	0.64092	0.64092	0.64092	0.64092	0.64092	0.64092	0.64092	0.64092	0.64092	0.64092	0.64092	0.64092
ArcelorMittal S.A.	SRO00002			ArcelorMittal Hunedoara steel plant	Romania	ArcelorMittal Hunedoara SA [100%]	1	800	800	N/A		N/A	800	electric	EAF	operating					0.704682	0.680387	0.605123	0.573487	0.64092	0.64092	0.64092	0.64092	0.64092	0.64092	0.64092	0.64092	0.64092	0.64092	0.64092	0.64092	0.64092	0.64092	0.64092	0.64092	0.64092	0.64092	0.64092	0.64092	0.64092	0.64092	0.64092	0.64092	0.64092
ArcelorMittal S.A.	SZA00001			ArcelorMittal Newcastle Steel Works	South Africa	Arcelormittal South Africa Ltd [100%]	1	1900	1900	2044		N/A	N/A	integrated (BF)	BF, BOF	operating					0.704682	0.680387	0.605123	0.573487	0.64092	0.64092	0.64092	0.64092	0.64092	0.64092	0.64092	0.64092	0.64092	0.64092	0.64092	0.64092	0.64092	0.64092	0.64092	0.64092	0.64092	0.64092	0.64092	0.64092	0.64092	0.64092	0.64092	0.64092	0.64092
ArcelorMittal S.A.	SZA00004			ArcelorMittal Saldanha Steel Works	South Africa	Arcelormittal South Africa Ltd [100%]	1	1200	1200	760		800	1200	ironmaking (DRI)	BF, DRI, EAF	mothballed					0.704682	0.680387	0.605123	0.573487	0.64092	0.64092	0.64092	0.64092	0.64092	0.64092	0.64092	0.64092	0.64092	0.64092	0.64092	0.64092	0.64092	0.64092	0.64092	0.64092	0.64092	0.64092	0.64092	0.64092	0.64092	0.64092	0.64092	0.64092	0.64092
ArcelorMittal S.A.	SZA00002			ArcelorMittal Vanderbijlpark Steel Works	South Africa	Arcelormittal South Africa Ltd [100%]	1	4500	4500	3200		950	N/A	integrated (BF)	BF, BOF, DRI	operating					0.704682	0.680387	0.605123	0.573487	0.64092	0.64092	0.64092	0.64092	0.64092	0.64092	0.64092	0.64092	0.64092	0.64092	0.64092	0.64092	0.64092	0.64092	0.64092	0.64092	0.64092	0.64092	0.64092	0.64092	0.64092	0.64092	0.64092	0.64092	0.64092
ArcelorMittal S.A.	SZA00002			Dummy - ArcelorMittal Vanderbijlpark Steel Works transition (EAF addition)	South Africa	Arcelormittal South Africa Ltd [100%]	0.6922	1700	1176.74		N/A		1700	electric	EAF	announced					0.704682	0.680387	0.605123	0.573487	0.64092	0.64092	0.64092	0.64092	0.64092	0.64092	0.64092	0.64092	0.64092	0.64092	0.64092	0.64092	0.64092	0.64092	0.64092	0.64092	0.64092	0.64092	0.64092	0.64092	0.64092	0.64092	0.64092	0.64092	0.64092
ArcelorMittal S.A.	SES00001			ArcelorMittal Asturias (Gijón) steel plant	Spain	ArcelorMittal SA [100%]	1	1200	1200	4200		N/A	N/A	integrated (BF)	BF, BOF	operating					0.704682	0.680387	0.605123	0.573487	0.64092	0.64092	0.64092	0.64092	0.64092	0.64092	0.64092	0.64092	0.64092	0.64092	0.64092	0.64092	0.64092	0.64092	0.64092	0.64092	0.64092	0.64092	0.64092	0.64092	0.64092	0.64092	0.64092	0.64092	0.64092
ArcelorMittal S.A.	SES00001			Dummy - ArcelorMittal Asturias (Gijón) steel plant EAF expansion	Spain	ArcelorMittal SA [100%]	1							electric	EAF	construction					0.704682	0.680387	0.605123	0.573487	0.64092	0.64092	0.64092	0.64092	0.64092	0.64092	0.64092	0.64092	0.64092	0.64092	0.64092	0.64092	0.64092	0.64092	0.64092	0.64092	0.64092	0.64092	0.64092	0.64092	0.64092	0.64092	0.64092	0.64092	0.64092
ArcelorMittal S.A.	SES00001			Dummy - ArcelorMittal Asturias (Gijón) steel plant DRI expansion	Spain	ArcelorMittal SA [100%]	1							integrated (DRI)	DRI, EAF	announced					0.704682	0.680387	0.605123	0.573487	0.64092	0.64092	0.64092	0.64092	0.64092	0.64092	0.64092	0.64092	0.64092	0.64092	0.64092	0.64092	0.64092	0.64092	0.64092	0.64092	0.64092	0.64092	0.64092	0.64092	0.64092	0.64092	0.64092	0.64092	0.64092
ArcelorMittal S.A.	SES00007			ArcelorMittal Olaberria-Bergara (Olaberria) steel plant	Spain	ArcelorMittal SA [100%]	1	1450	1450	N/A		N/A	1450	electric	EAF	operating					0.704682	0.680387	0.605123	0.573487	0.64092	0.64092	0.64092	0.64092	0.64092	0.64092	0.64092	0.64092	0.64092	0.64092	0.64092	0.64092	0.64092	0.64092	0.64092	0.64092	0.64092	0.64092	0.64092	0.64092	0.64092	0.64092	0.64092	0.64092	0.64092
ArcelorMittal S.A.	SES00008			ArcelorMittal Asturias (Avilés) steel plant	Spain	ArcelorMittal SA [100%]	1	4200	4200	N/A		N/A	N/A	oxygen	BOF	operating					0.704682	0.680387	0.605123	0.573487	0.64092	0.64092	0.64092	0.64092	0.64092	0.64092	0.64092	0.64092	0.64092	0.64092	0.64092	0.64092	0.64092	0.64092	0.64092	0.64092	0.64092	0.64092	0.64092	0.64092	0.64092	0.64092	0.64092	0.64092	0.64092
ArcelorMittal S.A.	SES00002			ArcelorMittal Sestao steel plant	Spain	ArcelorMittal SA [100%]	1	2000	2000	N/A		N/A	2000	electric	EAF	operating					0.704682	0.680387	0.605123	0.573487	0.64092	0.64092	0.64092	0.64092	0.64092	0.64092	0.64092	0.64092	0.64092	0.64092	0.64092	0.64092	0.64092	0.64092	0.64092	0.64092	0.64092	0.64092	0.64092	0.64092	0.64092	0.64092	0.64092	0.64092	0.64092
ArcelorMittal S.A.	SUA00002			ArcelorMittal Kryvyi Rih steel plant	Ukraine	ArcelorMittal SA [100%]	1	8000	8000	11450		N/A	N/A	integrated (BF)	BF, BOF, OHF	operating					0.704682	0.680387	0.605123	0.573487	0.64092	0.64092	0.64092	0.64092	0.64092	0.64092	0.64092	0.64092	0.64092	0.64092	0.64092	0.64092	0.64092	0.64092	0.64092	0.64092	0.64092	0.64092	0.64092	0.64092	0.64092	0.64092	0.64092	0.64092	0.64092
ArcelorMittal S.A.	SUS00081			AM/NS Calvert LLC	United States	ArcelorMittal SA [50%]; Nippon Steel Corp [50%]	0.5	1500	750	N/A		N/A	1500	electric	EAF	operating					0.704682	0.680387	0.605123	0.573487	0.64092	0.64092	0.64092	0.64092	0.64092	0.64092	0.64092	0.64092	0.64092	0.64092	0.64092	0.64092	0.64092	0.64092	0.64092	0.64092	0.64092	0.64092	0.64092	0.64092	0.64092	0.64092	0.64092	0.64092	0.64092
ArcelorMittal S.A.	SUS00053			ArcelorMittal Texas DRI plant	United States	ArcelorMittal SA [80%]; voestalpine AG [20%]	0.8	N/A	1600	N/A		2000	N/A	ironmaking (DRI)	DRI	operating					0.704682	0.680387	0.605123	0.573487	0.64092	0.64092	0.64092	0.64092	0.64092	0.64092	0.64092	0.64092	0.64092	0.64092	0.64092	0.64092	0.64092	0.64092	0.64092	0.64092	0.64092	0.64092	0.64092	0.64092	0.64092	0.64092	0.64092	0.64092	0.64092
Company wide average Utilization Rate																					0.704682	0.680387	0.605123	0.573487	0.64092
Production output trajectory (mt crude steel produced)
ArcelorMittal S.A.	SAR00001			ArcelorMittal Acindar Villa Constitución steel plant	Argentina	ArcelorMittal SA [100%]	1	1750	1750	N/A		600	1750	integrated (DRI)	DRI, EAF	operating					1233.19	1190.68	1058.97	1003.6	1121.61	1121.61	1121.61	1121.61	1121.61	1121.61	1121.61	1121.61	1121.61	1121.61	1121.61	1121.61	1121.61	1121.61	1121.61	1121.61	1121.61	1121.61	1121.61	1121.61	1121.61	1121.61	1121.61	1121.61	1121.61
ArcelorMittal S.A.	SBE00001			ArcelorMittal Gent steel plant	Belgium	ArcelorMittal SA [100%]	1	5000	5000	5000		N/A	N/A	integrated (BF)	BF, BOF	operating					3523.41	3401.94	3025.61	2867.44	3204.6	3204.6	3204.6	3204.6	3204.6	3204.6	1474.12	1474.12	1474.12	1474.12	1474.12	1474.12	1474.12	1474.12	1474.12	1474.12	1474.12	1474.12	1474.12	1474.12	1474.12	1474.12	1474.12	1474.12	1474.12
ArcelorMittal S.A.	SBE00001-1			Dummy - ArcelorMittal Gent steel plant (DRI-EAF addition)	Belgium	ArcelorMittal SA [100%]	1	2500	2500	N/A		2500	2500	integrated (DRI)	DRI, EAF	announced					0	0	0	0	0	0	0	0	0	0	1602.3	1602.3	1602.3	1602.3	1602.3	1602.3	1602.3	1602.3	1602.3	1602.3	1602.3	1602.3	1602.3	1602.3	1602.3	1602.3	1602.3	1602.3	1602.3
ArcelorMittal S.A.	SBA00001			ArcelorMittal Zenica steel plant	Bosnia and Herzegovina	ArcelorMittal SA [100%]	1	1940	1940	1100	1140	N/A	800	integrated (BF)	BF, BOF, EAF	operating					803.338	775.641	689.84	653.775	730.649	730.649	730.649	730.649	730.649	730.649	730.649	730.649	730.649	730.649	730.649	730.649	730.649	730.649	730.649	730.649	730.649	730.649	730.649	730.649	730.649	730.649	730.649	730.649	730.649
ArcelorMittal S.A.	SBA00001			ArcelorMittal Zenica steel plant (scrap-EAF)	Bosnia and Herzegovina	ArcelorMittal SA [100%]	1						800	electric	EAF	operating					563.746	544.31	484.098	458.79	512.736	512.736	512.736	512.736	512.736	512.736	512.736	512.736	512.736	512.736	512.736	512.736	512.736	512.736	512.736	512.736	512.736	512.736	512.736	512.736	512.736	512.736	512.736	512.736	512.736
ArcelorMittal S.A.	SBR00018			ArcelorMittal Barra Mansa steel plant	Brazil	ArcelorMittal SA [100%]	1	800	800	N/A		N/A	800	electric	EAF	operating					563.746	544.31	484.098	458.79	512.736	512.736	512.736	512.736	512.736	512.736	512.736	512.736	512.736	512.736	512.736	512.736	512.736	512.736	512.736	512.736	512.736	512.736	512.736	512.736	512.736	512.736	512.736	512.736	512.736
ArcelorMittal S.A.	SBR00013			ArcelorMittal Juiz de Fora steel plant	Brazil	ArcelorMittal SA [100%]	1	1100	1100	360	N/A	N/A	1100	integrated (BF-EAF)	BF, EAF	operating					253.686	244.939	217.844	206.455	230.731	230.731	230.731	230.731	230.731	230.731	230.731	230.731	230.731	230.731	230.731	230.731	230.731	230.731	230.731	230.731	230.731	230.731	230.731	230.731	230.731	230.731	230.731	230.731	230.731
ArcelorMittal S.A.	SBR00013			ArcelorMittal Juiz de Fora steel plant (scrap-EAF)	Brazil	ArcelorMittal SA [100%]	1						1100	electric	EAF	operating					521.465	503.487	447.791	424.38	474.281	474.281	474.281	474.281	474.281	474.281	474.281	474.281	474.281	474.281	474.281	474.281	474.281	474.281	474.281	474.281	474.281	474.281	474.281	474.281	474.281	474.281	474.281	474.281	474.281
ArcelorMittal S.A.	SBR00003			ArcelorMittal Monlevade steel plant	Brazil	ArcelorMittal SA [100%]	1	1200	1200	1040		N/A	N/A	integrated (BF)	BF, BOF	operating					845.619	816.465	726.148	688.184	769.104	769.104	769.104	769.104	769.104	769.104	769.104	769.104	769.104	769.104	769.104	769.104	769.104	769.104	769.104	769.104	769.104	769.104	769.104	769.104	769.104	769.104	769.104	769.104	769.104
ArcelorMittal S.A.	SBR00003			Dummy - ArcelorMittal Monlevade steel plant (BF-EAF)	Brazil	ArcelorMittal SA [100%]	1			1200			1000	integrated (BF-EAF)	BF, EAF	construction					0	0	0	0	0	0	640.92	640.92	640.92	640.92	640.92	640.92	640.92	640.92	640.92	640.92	640.92	640.92	640.92	640.92	640.92	640.92	640.92	640.92	640.92	640.92	640.92	640.92	640.92
ArcelorMittal S.A.	SBR00008			ArcelorMittal Pecém steel plant	Brazil	ArcelorMittal SA [100%]	1	3000	3000	3192		N/A	N/A	integrated (BF)	BF, BOF	operating					0	0	0	1720.46	1922.76	1922.76	1922.76	1922.76	1922.76	1922.76	1922.76	1922.76	1922.76	1922.76	1922.76	1922.76	1922.76	1922.76	1922.76	1922.76	1922.76	1922.76	1922.76	1922.76	1922.76	1922.76	1922.76	1922.76	1922.76
ArcelorMittal S.A.	SBR00009			ArcelorMittal Piracicaba steel plant	Brazil	ArcelorMittal SA [100%]	1	1100	1100	N/A		N/A	1100	electric	EAF	operating					775.15	748.426	665.635	630.836	705.012	705.012	705.012	705.012	705.012	705.012	705.012	705.012	705.012	705.012	705.012	705.012	705.012	705.012	705.012	705.012	705.012	705.012	705.012	705.012	705.012	705.012	705.012	705.012	705.012
ArcelorMittal S.A.	SBR00004			ArcelorMittal Resende steel plant	Brazil	ArcelorMittal SA [100%]	1	1000	1000	N/A		N/A	1000	electric	EAF	operating					704.682	680.387	605.123	573.487	640.92	640.92	640.92	640.92	640.92	640.92	640.92	640.92	640.92	640.92	640.92	640.92	640.92	640.92	640.92	640.92	640.92	640.92	640.92	640.92	640.92	640.92	640.92	640.92	640.92
ArcelorMittal S.A.	SBR00002			ArcelorMittal Tubarão steel plant	Brazil	ArcelorMittal SA [100%]	1	7500	7500	7280		N/A	N/A	integrated (BF)	BF, BOF	operating					5285.12	5102.9	4538.42	4301.15	4806.9	4806.9	4806.9	4806.9	4806.9	4806.9	4806.9	4806.9	4806.9	4806.9	4806.9	4806.9	4806.9	4806.9	4806.9	4806.9	4806.9	4806.9	4806.9	4806.9	4806.9	4806.9	4806.9	4806.9	4806.9
ArcelorMittal S.A.	SCA00002			ArcelorMittal Dofasco steel plant	Canada	ArcelorMittal SA [100%]	1	4050	4050	3024		N/A	1350	integrated (BF)	BF, BOF, EAF	operating					2853.96	2755.57	2450.75	2322.62	2595.73	2595.73	2595.73	2595.73	1057.52	1057.52	1057.52	1057.52	1057.52	1057.52	1057.52	1057.52	1057.52	1057.52	1057.52	1057.52	1057.52	1057.52	1057.52	1057.52	1057.52	1057.52	1057.52	1057.52	1057.52
ArcelorMittal S.A.	SCA00002			Dummy - ArcelorMittal Dofasco steel plant transition (DRI-EAF addition)	Canada	ArcelorMittal SA [100%]	1	2400	2400	N/A		2649	2400	integrated (DRI)	DRI, EAF	announced					0	0	0	0	0	0	0	0	1538.21	1538.21	1538.21	1538.21	1538.21	1538.21	1538.21	1538.21	1538.21	1538.21	1538.21	1538.21	1538.21	1538.21	1538.21	1538.21	1538.21	1538.21	1538.21	1538.21	1538.21
ArcelorMittal S.A.	SCA00001			ArcelorMittal Montreal steel plant	Canada	ArcelorMittal SA [100%]	1	2400	2400	N/A		1000	2400	integrated (DRI)	DRI, EAF	operating					1691.24	1632.93	1452.3	1376.37	1538.21	1538.21	1538.21	1538.21	1538.21	1538.21	1538.21	1538.21	1538.21	1538.21	1538.21	1538.21	1538.21	1538.21	1538.21	1538.21	1538.21	1538.21	1538.21	1538.21	1538.21	1538.21	1538.21	1538.21	1538.21
ArcelorMittal S.A.	SFR00001			ArcelorMittal Dunkerque steel plant	France	ArcelorMittal SA [100%]	1	6750	6750	6900		N/A	N/A	integrated (BF)	BF, BOF	operating					4756.6	4592.61	4084.58	3871.04	4326.21	4326.21	4326.21	1442.07	1442.07	1442.07	1442.07	1442.07	1442.07	1442.07	1442.07	1442.07	1442.07	1442.07	1442.07	1442.07	1442.07	1442.07	1442.07	1442.07	1442.07	1442.07	1442.07	1442.07	1442.07
ArcelorMittal S.A.	SFR00001			ArcelorMittal Dunkerque steel plant (scrap-EAF)	France	ArcelorMittal SA [100%]	1							electric	EAF	announced					0	0	0	0	0	0	0	1281.84	1281.84	1281.84	1281.84	1281.84	1281.84	1281.84	1281.84	1281.84	1281.84	1281.84	1281.84	1281.84	1281.84	1281.84	1281.84	1281.84	1281.84	1281.84	1281.84	1281.84	1281.84
ArcelorMittal S.A.	SFR00001-1			Dummy - ArcelorMittal Dunkerque steel plant transition (DRI and EAF addition)	France	ArcelorMittal SA [100%]	1	4500	4500	N/A		2500	4500	integrated (DRI)	DRI, EAF	announced					0	0	0	0	0	0	0	1602.3	1602.3	1602.3	1602.3	1602.3	1602.3	1602.3	1602.3	1602.3	1602.3	1602.3	1602.3	1602.3	1602.3	1602.3	1602.3	1602.3	1602.3	1602.3	1602.3	1602.3	1602.3
ArcelorMittal S.A.	SFR00002			ArcelorMittal Méditerranée Fos sur Mer steel plant	France	ArcelorMittal SA [100%]	1	4000	4000	4000		N/A	N/A	integrated (BF)	BF, BOF	operating					2818.73	2721.55	2420.49	2293.95	2563.68	2563.68	2563.68	2563.68	2563.68	2563.68	2563.68	1281.84	1281.84	1281.84	1281.84	1281.84	1281.84	1281.84	1281.84	1281.84	1281.84	1281.84	1281.84	1281.84	1281.84	1281.84	1281.84	1281.84	1281.84
ArcelorMittal S.A.	SFR00002-1			Dummy - ArcelorMittal Méditerranée Fos sur Mer steel plant transition (EAF addition)	France	ArcelorMittal SA [100%]	1	2000	2000	N/A		N/A	2000	electric	EAF	announced					0	0	0	0	0	0	0	1281.84	1281.84	1281.84	1281.84	1281.84	1281.84	1281.84	1281.84	1281.84	1281.84	1281.84	1281.84	1281.84	1281.84	1281.84	1281.84	1281.84	1281.84	1281.84	1281.84	1281.84	1281.84
ArcelorMittal S.A.	SDE00003			AG der Dillinger Hüttenwerke Dillingen steel plant	Germany	SHS Stahl Holding Saar GmbH & Co KgaA [57.2%]; ArcelorMittal SA [33.4%]; Saarstahl AG [9.4%]	0.334	2760	921.84	4790		N/A	N/A	integrated (BF)	BF, BOF	operating					649.604	627.208	557.827	528.663	590.826	590.826	590.826	216.208	216.208	216.208	216.208	216.208	216.208	216.208	216.208	216.208	216.208	216.208	216.208	216.208	216.208	216.208	216.208	216.208	216.208	216.208	216.208	216.208	216.208
ArcelorMittal S.A.	SDE00003-1			Dummy - AG der Dillinger Hüttenwerke Dillingen steel plant transition (DRI-EAF addition)	Germany	SHS Stahl Holding Saar GmbH & Co KgaA [57.2%]; ArcelorMittal SA [33.4%]; Saarstahl AG [9.4%]	0.334	1750	584.5	N/A		2500	1750	integrated (DRI)	DRI, EAF	announced					0	0	0	0	0	0	0	374.618	374.618	374.618	374.618	374.618	374.618	374.618	374.618	374.618	374.618	374.618	374.618	374.618	374.618	374.618	374.618	374.618	374.618	374.618	374.618	374.618	374.618
ArcelorMittal S.A.	SDE00006			ArcelorMittal Bremen steel plant	Germany	ArcelorMittal SA [100%]	1	3800	3800	3800		N/A	N/A	integrated (BF)	BF, BOF	operating					2395.92	2313.32	2057.42	1949.86	2179.13	2179.13	2179.13	2179.13	2179.13	2179.13	1057.52	1057.52	1057.52	1057.52	1057.52	1057.52	1057.52	1057.52	1057.52	1057.52	1057.52	1057.52	1057.52	1057.52	1057.52	1057.52	1057.52	1057.52	1057.52
ArcelorMittal S.A.	SDE00006-1			Dummy - ArcelorMittal Bremen steel plant transition (DRI-EAF addition)	Germany	ArcelorMittal SA [100%]	1	1750	1750	N/A		2000	1750	integrated (DRI)	DRI, EAF	announced					0	0	0	0	0	0	0	0	0	0	1121.61	1121.61	1121.61	1121.61	1121.61	1121.61	1121.61	1121.61	1121.61	1121.61	1121.61	1121.61	1121.61	1121.61	1121.61	1121.61	1121.61	1121.61	1121.61
ArcelorMittal S.A.	SDE00008			ArcelorMittal Duisburg steel plant	Germany	ArcelorMittal SA [100%]	1	1300	1300	N/A		N/A	N/A	oxygen	BOF	operating					916.087	884.503	786.66	745.533	833.196	833.196	833.196	833.196	833.196	0	0	0	0	0	0	0	0	0	0	0	0	0	0	0	0	0	0	0	0
ArcelorMittal S.A.	SDE00008-1			Dummy - ArcelorMittal Duisburg steel plant transition (EAF addition)	Germany	ArcelorMittal SA [100%]	1	1300	1300	N/A		N/A	1300	electric	EAF	announced					0	0	0	0	0	0	0	0	0	640.92	640.92	640.92	640.92	640.92	640.92	640.92	640.92	640.92	640.92	640.92	640.92	640.92	640.92	640.92	640.92	640.92	640.92	640.92	640.92
ArcelorMittal S.A.	SDE00005			ArcelorMittal Eisenhüttenstadt steel plant	Germany	ArcelorMittal SA [100%]	1	2400	2400	1825		N/A	N/A	integrated (BF)	BF, BOF	operating					1691.24	1632.93	1452.3	1376.37	1538.21	1538.21	1538.21	1538.21	1538.21	1538.21	0	0	0	0	0	0	0	0	0	0	0	0	0	0	0	0	0	0	0
ArcelorMittal S.A.	SDE00005-1			Dummy - ArcelorMittal Eisenhüttenstadt steel plant transition (DRI-EAF addition)	Germany	ArcelorMittal SA [100%]	1	1750	1750	N/A		>0	1750	integrated (DRI)	DRI, EAF	announced					0	0	0	0	0	0	0	0	0	0	1121.61	1121.61	1121.61	1121.61	1121.61	1121.61	1121.61	1121.61	1121.61	1121.61	1121.61	1121.61	1121.61	1121.61	1121.61	1121.61	1121.61	1121.61	1121.61
ArcelorMittal S.A.	SDE00007			ArcelorMittal Hamburg steel plant	Germany	ArcelorMittal SA [100%]	1	1100	1100	N/A		600	1100	integrated (DRI)	DRI, EAF	operating					422.809	408.232	363.074	344.092	384.552	384.552	448.644	448.644	448.644	448.644	833.196	833.196	833.196	833.196	833.196	833.196	833.196	833.196	833.196	833.196	833.196	833.196	833.196	833.196	833.196	833.196	833.196	833.196	833.196
ArcelorMittal S.A.	SDE00007			ArcelorMittal Hamburg steel plant (scrap-EAF)	Germany	ArcelorMittal SA [100%]	1						1100	electric	EAF	operating					352.341	340.194	302.561	286.744	320.46	320.46	320.46	320.46	320.46	320.46	320.46	320.46	320.46	320.46	320.46	320.46	320.46	320.46	320.46	320.46	320.46	320.46	320.46	320.46	320.46	320.46	320.46	320.46	320.46
ArcelorMittal S.A.	SIN00066			ArcelorMittal Nippon Steel Kendrapara plant	India	ArcelorMittal SA [60%]; Nippon Steel Corp [40%]	0.6	14000	8400	unknown		unknown	N/A	oxygen	BOF	announced					0	0	0	0	0	0	0	0	5383.73	5383.73	5383.73	5383.73	5383.73	5383.73	5383.73	5383.73	5383.73	5383.73	5383.73	5383.73	5383.73	5383.73	5383.73	5383.73	5383.73	5383.73	5383.73	5383.73	5383.73
ArcelorMittal S.A.	SIN00004			ArcelorMittal Nippon Steel India Hazira Plant	India	ArcelorMittal SA [60%]; Nippon Steel Corp [40%]	0.6	9600	5760	2040		7830	9600	integrated (BF-EAF)	BF, DRI, EAF	operating					862.531	832.794	740.67	701.948	784.486	784.486	784.486	784.486	784.486	784.486	784.486	784.486	784.486	784.486	784.486	784.486	784.486	784.486	784.486	784.486	784.486	784.486	784.486	784.486	784.486	784.486	784.486	784.486	784.486
ArcelorMittal S.A.	SIN00004			ArcelorMittal Nippon Steel India Hazira Plant	India	ArcelorMittal SA [60%]; Nippon Steel Corp [40%]	0.6					7830		integrated (DRI)	DRI, EAF	operating					3310.6	3196.46	2842.87	2694.24	3011.04	3011.04	3011.04	3011.04	3011.04	3011.04	3011.04	3011.04	3011.04	3011.04	3011.04	3011.04	3011.04	3011.04	3011.04	3011.04	3011.04	3011.04	3011.04	3011.04	3011.04	3011.04	3011.04	3011.04	3011.04
ArcelorMittal S.A.	SIN00004			ArcelorMittal Nippon Steel India Hazira Plant	India	ArcelorMittal SA [60%]; Nippon Steel Corp [40%]	0.6				6000			integrated (BF)	BF, BOF	construction					0	0	0	0	0	2691.86	2691.86	2691.86	2691.86	5922.1	5922.1	5922.1	5922.1	5922.1	5922.1	5922.1	5922.1	5922.1	5922.1	5922.1	5922.1	5922.1	5922.1	5922.1	5922.1	5922.1	5922.1	5922.1	5922.1
ArcelorMittal S.A.				ArcelorMittal Nippon Steel Paradip Steel Plant	India	ArcelorMittal SA [60%]; Nippon Steel Corp [40%]	0.6	7000	4200					integrated (BF)	BF, BOF	announced					0	0	0	0	0	0	0	0	0	2691.86	2691.86	2691.86	2691.86	2691.86	2691.86	2691.86	2691.86	2691.86	2691.86	2691.86	2691.86	2691.86	2691.86	2691.86	2691.86	2691.86	2691.86	2691.86	2691.86
ArcelorMittal S.A.	SIT00003			ArcelorMittal Acciaierie d'Italia Taranto steel plant	Italy	ArcelorMittal SA [40%]; Acciaierie d'italia SpA [60%]	0.4	11500	4600	9500		N/A	N/A	integrated (BF)	BF, BOF	operating					3241.54	3129.78	2783.57	2638.04	0	0	0	0	0	0	0	0	0	0	0	0	0	0	0	0	0	0	0	0	0	0	0	0	0
ArcelorMittal S.A.	SKZ00001			ArcelorMittal Temirtau steel plant	Kazakhstan	ArcelorMittal SA [100%]	1	6000	6000	5125		N/A	N/A	integrated (BF)	BF, BOF	operating					4228.09	4082.32	3630.74	3440.92	3845.52	3845.52	3845.52	3845.52	3845.52	3845.52	3845.52	3845.52	3845.52	3845.52	3845.52	3845.52	3845.52	3845.52	3845.52	3845.52	3845.52	3845.52	3845.52	3845.52	3845.52	3845.52	3845.52	3845.52	3845.52
ArcelorMittal S.A.	SLU00001			ArcelorMittal Differdange steel plant	Luxembourg	ArcelorMittal SA [100%]	1	2000	2000	N/A		N/A	2000	electric	EAF	operating					1409.36	1360.77	1210.25	1146.97	1281.84	1281.84	1281.84	1281.84	1281.84	1281.84	1281.84	1281.84	1281.84	1281.84	1281.84	1281.84	1281.84	1281.84	1281.84	1281.84	1281.84	1281.84	1281.84	1281.84	1281.84	1281.84	1281.84	1281.84	1281.84
ArcelorMittal S.A.	SLU00002			ArcelorMittal Esch-Belval steel plant	Luxembourg	ArcelorMittal SA [100%]	1	1000	1000	N/A		N/A	1000	electric	EAF	operating					704.682	680.387	605.123	573.487	640.92	801.15	801.15	801.15	801.15	801.15	801.15	801.15	801.15	801.15	801.15	801.15	801.15	801.15	801.15	801.15	801.15	801.15	801.15	801.15	801.15	801.15	801.15	801.15	801.15
ArcelorMittal S.A.	SMX00002			ArcelorMittal Lázaro Cárdenas steel plant	Mexico	ArcelorMittal SA [100%]	1	6400	6400	1451.91	2400	3200	4000	integrated (BF)	BF, BOF	operating					1691.24	1632.93	1452.3	1376.37	1538.21	1538.21	1538.21	1538.21	1538.21	1538.21	1538.21	1538.21	1538.21	1538.21	1538.21	1538.21	1538.21	1538.21	1538.21	1538.21	1538.21	1538.21	1538.21	1538.21	1538.21	1538.21	1538.21	1538.21	1538.21
ArcelorMittal S.A.	SMX00002			ArcelorMittal Lázaro Cárdenas steel plant (DRI-EAF)	Mexico	ArcelorMittal SA [100%]	1					3200	4000	integrated (DRI)	DRI, EAF	operating					2818.73	2721.55	2420.49	2293.95	2563.68	2563.68	2563.68	2563.68	2563.68	2563.68	2563.68	2563.68	2563.68	2563.68	2563.68	2563.68	2563.68	2563.68	2563.68	2563.68	2563.68	2563.68	2563.68	2563.68	2563.68	2563.68	2563.68	2563.68	2563.68
ArcelorMittal S.A.	SMA00002			ArcelorMittal Sonasid Casablanca steel plant	Morocco	ArcelorMittal SA [100%]	1	800	800	N/A		N/A	800	electric	EAF	operating					563.746	544.31	484.098	458.79	512.736	512.736	512.736	512.736	512.736	512.736	512.736	512.736	512.736	512.736	512.736	512.736	512.736	512.736	512.736	512.736	512.736	512.736	512.736	512.736	512.736	512.736	512.736	512.736	512.736
ArcelorMittal S.A.	SPL00001			ArcelorMittal Dąbrowa Górnicza steel plant	Poland	ArcelorMittal SA [100%]	1	5000	5000	4500		N/A	N/A	integrated (BF)	BF, BOF	operating					3523.41	3401.94	3025.61	2867.44	3204.6	3204.6	3204.6	3204.6	3204.6	3204.6	3204.6	3204.6	3204.6	3204.6	3204.6	3204.6	3204.6	3204.6	3204.6	3204.6	3204.6	3204.6	3204.6	3204.6	3204.6	3204.6	3204.6	3204.6	3204.6
ArcelorMittal S.A.	SPL00006			ArcelorMittal Warszawa steel plant	Poland	ArcelorMittal SA [100%]	1	750	750	N/A		N/A	750	electric	EAF	operating					528.512	510.29	453.842	430.115	480.69	480.69	480.69	480.69	480.69	480.69	480.69	480.69	480.69	480.69	480.69	480.69	480.69	480.69	480.69	480.69	480.69	480.69	480.69	480.69	480.69	480.69	480.69	480.69	480.69
ArcelorMittal S.A.	SRO00002			ArcelorMittal Hunedoara steel plant	Romania	ArcelorMittal Hunedoara SA [100%]	1	800	800	N/A		N/A	800	electric	EAF	operating					563.746	544.31	484.098	458.79	512.736	512.736	512.736	512.736	512.736	512.736	512.736	512.736	512.736	512.736	512.736	512.736	512.736	512.736	512.736	512.736	512.736	512.736	512.736	512.736	512.736	512.736	512.736	512.736	512.736
ArcelorMittal S.A.	SZA00001			ArcelorMittal Newcastle Steel Works	South Africa	Arcelormittal South Africa Ltd [100%]	1	1900	1900	2044		N/A	N/A	integrated (BF)	BF, BOF	operating					926.784	894.832	795.846	754.239	0	0	0	0	0	0	0	0	0	0	0	0	0	0	0	0	0	0	0	0	0	0	0	0	0
ArcelorMittal S.A.	SZA00004			ArcelorMittal Saldanha Steel Works	South Africa	Arcelormittal South Africa Ltd [100%]	1	1200	1200	760		800	1200	ironmaking (DRI)	BF, DRI, EAF	mothballed					0	0	0	0	0	0	0	0	0	512.736	512.736	512.736	512.736	512.736	512.736	512.736	512.736	512.736	512.736	512.736	512.736	512.736	512.736	512.736	512.736	512.736	512.736	512.736	512.736
ArcelorMittal S.A.	SZA00002			ArcelorMittal Vanderbijlpark Steel Works	South Africa	Arcelormittal South Africa Ltd [100%]	1	4500	4500	3200		950	N/A	integrated (BF)	BF, BOF, DRI	operating					1658.46	1601.28	1424.14	1349.69	1508.39	1508.39	1508.39	1508.39	1508.39	1508.39	754.196	754.196	754.196	754.196	754.196	754.196	754.196	754.196	754.196	754.196	754.196	754.196	754.196	754.196	754.196	754.196	754.196	754.196	754.196
ArcelorMittal S.A.	SZA00002			Dummy - ArcelorMittal Vanderbijlpark Steel Works transition (EAF addition)	South Africa	Arcelormittal South Africa Ltd [100%]	0.6922	1700	1176.74		N/A		1700	electric	EAF	announced					0	0	0	0	0	0	0	0	0	0	754.196	754.196	754.196	754.196	754.196	754.196	754.196	754.196	754.196	754.196	754.196	754.196	754.196	754.196	754.196	754.196	754.196	754.196	754.196
ArcelorMittal S.A.	SES00001			ArcelorMittal Asturias (Gijón) steel plant	Spain	ArcelorMittal SA [100%]	1	1200	1200	4200		N/A	N/A	integrated (BF)	BF, BOF	operating					845.619	816.465	726.148	688.184	769.104	769.104	769.104	769.104	769.104	0	0	0	0	0	0	0	0	0	0	0	0	0	0	0	0	0	0	0	0
ArcelorMittal S.A.	SES00001			Dummy - ArcelorMittal Asturias (Gijón) steel plant EAF expansion	Spain	ArcelorMittal SA [100%]	1							electric	EAF	construction					0	0	0	0	0	0	705.012	705.012	705.012	0	0	0	0	0	0	0	0	0	0	0	0	0	0	0	0	0	0	0	0
ArcelorMittal S.A.	SES00001			Dummy - ArcelorMittal Asturias (Gijón) steel plant DRI expansion	Spain	ArcelorMittal SA [100%]	1							integrated (DRI)	DRI, EAF	announced					0	0	0	0	0	0	0	0	0	1474.12	1474.12	1474.12	1474.12	1474.12	1474.12	1474.12	1474.12	1474.12	1474.12	1474.12	1474.12	1474.12	1474.12	1474.12	1474.12	1474.12	1474.12	1474.12	1474.12
ArcelorMittal S.A.	SES00007			ArcelorMittal Olaberria-Bergara (Olaberria) steel plant	Spain	ArcelorMittal SA [100%]	1	1450	1450	N/A		N/A	1450	electric	EAF	operating					1021.79	986.561	877.428	831.556	929.334	929.334	929.334	929.334	929.334	929.334	929.334	929.334	929.334	929.334	929.334	929.334	929.334	929.334	929.334	929.334	929.334	929.334	929.334	929.334	929.334	929.334	929.334	929.334	929.334
ArcelorMittal S.A.	SES00008			ArcelorMittal Asturias (Avilés) steel plant	Spain	ArcelorMittal SA [100%]	1	4200	4200	N/A		N/A	N/A	oxygen	BOF	operating					2959.67	2857.63	2541.52	2408.65	2691.86	2691.86	2691.86	2691.86	2691.86	1345.93	1345.93	1345.93	1345.93	1345.93	1345.93	1345.93	1345.93	1345.93	1345.93	1345.93	1345.93	1345.93	1345.93	1345.93	1345.93	1345.93	1345.93	1345.93	1345.93
ArcelorMittal S.A.	SES00002			ArcelorMittal Sestao steel plant	Spain	ArcelorMittal SA [100%]	1	2000	2000	N/A		N/A	2000	electric	EAF	operating					1409.36	1360.77	1210.25	1146.97	1281.84	1281.84	1281.84	1281.84	1281.84	640.92	640.92	640.92	640.92	640.92	640.92	640.92	640.92	640.92	640.92	640.92	640.92	640.92	640.92	640.92	640.92	640.92	640.92	640.92	640.92
ArcelorMittal S.A.	SUA00002			ArcelorMittal Kryvyi Rih steel plant	Ukraine	ArcelorMittal SA [100%]	1	8000	8000	11450		N/A	N/A	integrated (BF)	BF, BOF, OHF	operating					5637.46	5443.1	1452.3	1376.37	1538.21	1538.21	1538.21	1538.21	1538.21	1538.21	1538.21	1538.21	1538.21	1538.21	1538.21	1538.21	1538.21	1538.21	1538.21	1538.21	1538.21	1538.21	1538.21	1538.21	1538.21	1538.21	1538.21	1538.21	1538.21
ArcelorMittal S.A.	SUS00081			AM/NS Calvert LLC	United States	ArcelorMittal SA [50%]; Nippon Steel Corp [50%]	0.5	1500	750	N/A		N/A	1500	electric	EAF	operating					0	0	0	430.115	480.69	480.69	480.69	480.69	480.69	480.69	480.69	480.69	480.69	480.69	480.69	480.69	480.69	480.69	480.69	480.69	480.69	480.69	480.69	480.69	480.69	480.69	480.69	480.69	480.69
ArcelorMittal S.A.	SUS00053			ArcelorMittal Texas DRI plant	United States	ArcelorMittal SA [80%]; voestalpine AG [20%]	0.8	N/A	1600	N/A		2000	N/A	ironmaking (DRI)	DRI	operating					0	0	968.197	917.579	1025.47	1025.47	1025.47	1025.47	1025.47	1025.47	1025.47	1025.47	1025.47	1025.47	1025.47	1025.47	1025.47	1025.47	1025.47	1025.47	1025.47	1025.47	1025.47	1025.47	1025.47	1025.47	1025.47	1025.47	1025.47
Total crude steel output																					71527	69061	59001	58067	61103.6	63955.7	65365.7	66647.5	72031.3	76287	76126.7	74844.9	74844.9	74844.9	74844.9	74844.9	74844.9	74844.9	74844.9	74844.9	74844.9	74844.9	74844.9	74844.9	74844.9	74844.9	74844.9	74844.9	74844.9
Reported crude steel output																					71527	69061	59001	58067
CO2 emissions trajectory (mt CO2)
ArcelorMittal S.A.	SAR00001			ArcelorMittal Acindar Villa Constitución steel plant	Argentina	ArcelorMittal SA [100%]	1	1750	1750	N/A		600	1750	integrated (DRI)	DRI, EAF	operating					1.29485	1.25021	1.11191	1.05378	1.17769	1.17769	1.17769	1.17769	1.17769	1.17769	1.17769	1.17769	1.17769	1.17769	1.17769	1.17769	1.17769	1.17769	1.17769	1.17769	1.17769	1.17769	1.17769	1.17769	1.17769	1.17769	1.17769	1.17769	1.17769
ArcelorMittal S.A.	SBE00001			ArcelorMittal Gent steel plant	Belgium	ArcelorMittal SA [100%]	1	5000	5000	5000		N/A	N/A	integrated (BF)	BF, BOF	operating					6.23644	6.02143	5.35534	5.07536	5.67214	5.67214	5.67214	5.67214	5.67214	5.67214	2.60918	2.60918	2.60918	2.60918	2.60918	2.60918	2.60918	2.60918	2.60918	2.60918	2.60918	2.60918	2.60918	2.60918	2.60918	2.60918	2.60918	2.60918	2.60918
ArcelorMittal S.A.	SBE00001-1			Dummy - ArcelorMittal Gent steel plant (DRI-EAF addition)	Belgium	ArcelorMittal SA [100%]	1	2500	2500	N/A		2500	2500	integrated (DRI)	DRI, EAF	announced					0	0	0	0	0	0	0	0	0	0	0.120172	0.120172	0.120172	0.120172	0.120172	0.120172	0.120172	0.120172	0.120172	0.120172	0.120172	0.120172	0.120172	0.120172	0.120172	0.120172	0.120172	0.120172	0.120172
ArcelorMittal S.A.	SBA00001			ArcelorMittal Zenica steel plant	Bosnia and Herzegovina	ArcelorMittal SA [100%]	1	1940	1940	1100	1140	N/A	800	integrated (BF)	BF, BOF, EAF	operating					1.42191	1.37289	1.22102	1.15718	1.29325	1.29325	1.29325	1.29325	1.29325	1.29325	1.29325	1.29325	1.29325	1.29325	1.29325	1.29325	1.29325	1.29325	1.29325	1.29325	1.29325	1.29325	1.29325	1.29325	1.29325	1.29325	1.29325	1.29325	1.29325
ArcelorMittal S.A.	SBA00001			ArcelorMittal Zenica steel plant (scrap-EAF)	Bosnia and Herzegovina	ArcelorMittal SA [100%]	1						800	electric	EAF	operating					0.0225498	0.0217724	0.0193639	0.0183516	0.0205094	0.0205094	0.0205094	0.0205094	0.0205094	0.0205094	0.0205094	0.0205094	0.0205094	0.0205094	0.0205094	0.0205094	0.0205094	0.0205094	0.0205094	0.0205094	0.0205094	0.0205094	0.0205094	0.0205094	0.0205094	0.0205094	0.0205094	0.0205094	0.0205094
ArcelorMittal S.A.	SBR00018			ArcelorMittal Barra Mansa steel plant	Brazil	ArcelorMittal SA [100%]	1	800	800	N/A		N/A	800	electric	EAF	operating					0.0281873	0.0272155	0.0242049	0.0229395	0.0256368	0.0256368	0.0256368	0.0256368	0.0256368	0.0256368	0.0256368	0.0256368	0.0256368	0.0256368	0.0256368	0.0256368	0.0256368	0.0256368	0.0256368	0.0256368	0.0256368	0.0256368	0.0256368	0.0256368	0.0256368	0.0256368	0.0256368	0.0256368	0.0256368
ArcelorMittal S.A.	SBR00013			ArcelorMittal Juiz de Fora steel plant	Brazil	ArcelorMittal SA [100%]	1	1100	1100	360	N/A	N/A	1100	integrated (BF-EAF)	BF, EAF	operating					0.555571	0.536417	0.477079	0.452137	0.505301	0.505301	0.505301	0.505301	0.505301	0.505301	0.505301	0.505301	0.505301	0.505301	0.505301	0.505301	0.505301	0.505301	0.505301	0.505301	0.505301	0.505301	0.505301	0.505301	0.505301	0.505301	0.505301	0.505301	0.505301
ArcelorMittal S.A.	SBR00013			ArcelorMittal Juiz de Fora steel plant (scrap-EAF)	Brazil	ArcelorMittal SA [100%]	1						1100	electric	EAF	operating					0.0260732	0.0251743	0.0223895	0.021219	0.023714	0.023714	0.023714	0.023714	0.023714	0.023714	0.023714	0.023714	0.023714	0.023714	0.023714	0.023714	0.023714	0.023714	0.023714	0.023714	0.023714	0.023714	0.023714	0.023714	0.023714	0.023714	0.023714	0.023714	0.023714
ArcelorMittal S.A.	SBR00003			ArcelorMittal Monlevade steel plant	Brazil	ArcelorMittal SA [100%]	1	1200	1200	1040		N/A	N/A	integrated (BF)	BF, BOF	operating					1.8519	1.78806	1.59026	1.50712	1.68434	1.68434	1.68434	1.68434	1.68434	1.68434	1.68434	1.68434	1.68434	1.68434	1.68434	1.68434	1.68434	1.68434	1.68434	1.68434	1.68434	1.68434	1.68434	1.68434	1.68434	1.68434	1.68434	1.68434	1.68434
ArcelorMittal S.A.	SBR00003			Dummy - ArcelorMittal Monlevade steel plant (BF-EAF)	Brazil	ArcelorMittal SA [100%]	1			1200			1000	integrated (BF-EAF)	BF, EAF	construction					0	0	0	0	0	0	1.40361	1.40361	1.40361	1.40361	1.40361	1.40361	1.40361	1.40361	1.40361	1.40361	1.40361	1.40361	1.40361	1.40361	1.40361	1.40361	1.40361	1.40361	1.40361	1.40361	1.40361	1.40361	1.40361
ArcelorMittal S.A.	SBR00008			ArcelorMittal Pecém steel plant	Brazil	ArcelorMittal SA [100%]	1	3000	3000	3192		N/A	N/A	integrated (BF)	BF, BOF	operating					0	0	0	3.76781	4.21084	4.21084	4.21084	4.21084	4.21084	4.21084	4.21084	4.21084	4.21084	4.21084	4.21084	4.21084	4.21084	4.21084	4.21084	4.21084	4.21084	4.21084	4.21084	4.21084	4.21084	4.21084	4.21084	4.21084	4.21084
ArcelorMittal S.A.	SBR00009			ArcelorMittal Piracicaba steel plant	Brazil	ArcelorMittal SA [100%]	1	1100	1100	N/A		N/A	1100	electric	EAF	operating					0.0387575	0.0374213	0.0332818	0.0315418	0.0352506	0.0352506	0.0352506	0.0352506	0.0352506	0.0352506	0.0352506	0.0352506	0.0352506	0.0352506	0.0352506	0.0352506	0.0352506	0.0352506	0.0352506	0.0352506	0.0352506	0.0352506	0.0352506	0.0352506	0.0352506	0.0352506	0.0352506	0.0352506	0.0352506
ArcelorMittal S.A.	SBR00004			ArcelorMittal Resende steel plant	Brazil	ArcelorMittal SA [100%]	1	1000	1000	N/A		N/A	1000	electric	EAF	operating					0.0352341	0.0340194	0.0302561	0.0286744	0.032046	0.032046	0.032046	0.032046	0.032046	0.032046	0.032046	0.032046	0.032046	0.032046	0.032046	0.032046	0.032046	0.032046	0.032046	0.032046	0.032046	0.032046	0.032046	0.032046	0.032046	0.032046	0.032046	0.032046	0.032046
ArcelorMittal S.A.	SBR00002			ArcelorMittal Tubarão steel plant	Brazil	ArcelorMittal SA [100%]	1	7500	7500	7280		N/A	N/A	integrated (BF)	BF, BOF	operating					11.5744	11.1754	9.93914	9.41953	10.5271	10.5271	10.5271	10.5271	10.5271	10.5271	10.5271	10.5271	10.5271	10.5271	10.5271	10.5271	10.5271	10.5271	10.5271	10.5271	10.5271	10.5271	10.5271	10.5271	10.5271	10.5271	10.5271	10.5271	10.5271
ArcelorMittal S.A.	SCA00002			ArcelorMittal Dofasco steel plant	Canada	ArcelorMittal SA [100%]	1	4050	4050	3024		N/A	1350	integrated (BF)	BF, BOF, EAF	operating					6.60285	6.3752	5.66998	5.37355	6.0054	6.0054	6.0054	6.0054	2.44664	2.44664	2.44664	2.44664	2.44664	2.44664	2.44664	2.44664	2.44664	2.44664	2.44664	2.44664	2.44664	2.44664	2.44664	2.44664	2.44664	2.44664	2.44664	2.44664	2.44664
ArcelorMittal S.A.	SCA00002			Dummy - ArcelorMittal Dofasco steel plant transition (DRI-EAF addition)	Canada	ArcelorMittal SA [100%]	1	2400	2400	N/A		2649	2400	integrated (DRI)	DRI, EAF	announced					0	0	0	0	0	0	0	0	1.61512	1.61512	1.61512	1.61512	1.61512	1.61512	1.61512	1.61512	1.61512	1.61512	1.61512	1.61512	1.61512	1.61512	1.61512	1.61512	1.61512	1.61512	1.61512	1.61512	1.61512
ArcelorMittal S.A.	SCA00001			ArcelorMittal Montreal steel plant	Canada	ArcelorMittal SA [100%]	1	2400	2400	N/A		1000	2400	integrated (DRI)	DRI, EAF	operating					1.7758	1.71458	1.52491	1.44519	1.61512	1.61512	1.61512	1.61512	1.61512	1.61512	1.61512	1.61512	1.61512	1.61512	1.61512	1.61512	1.61512	1.61512	1.61512	1.61512	1.61512	1.61512	1.61512	1.61512	1.61512	1.61512	1.61512	1.61512	1.61512
ArcelorMittal S.A.	SFR00001			ArcelorMittal Dunkerque steel plant	France	ArcelorMittal SA [100%]	1	6750	6750	6900		N/A	N/A	integrated (BF)	BF, BOF	operating					8.41919	8.12893	7.22971	6.85174	7.65739	7.65739	7.65739	2.55246	2.55246	2.55246	2.55246	2.55246	2.55246	2.55246	2.55246	2.55246	2.55246	2.55246	2.55246	2.55246	2.55246	2.55246	2.55246	2.55246	2.55246	2.55246	2.55246	2.55246	2.55246
ArcelorMittal S.A.	SFR00001			ArcelorMittal Dunkerque steel plant (scrap-EAF)	France	ArcelorMittal SA [100%]	1							electric	EAF	announced					0	0	0	0	0	0	0	0.0512736	0.0512736	0.0512736	0.0512736	0.0512736	0.0512736	0.0512736	0.0512736	0.0512736	0.0512736	0.0512736	0.0512736	0.0512736	0.0512736	0.0512736	0.0512736	0.0512736	0.0512736	0.0512736	0.0512736	0.0512736	0.0512736
ArcelorMittal S.A.	SFR00001-1			Dummy - ArcelorMittal Dunkerque steel plant transition (DRI and EAF addition)	France	ArcelorMittal SA [100%]	1	4500	4500	N/A		2500	4500	integrated (DRI)	DRI, EAF	announced					0	0	0	0	0	0	0	1.68241	1.68241	1.68241	0.120172	0.120172	0.120172	0.120172	0.120172	0.120172	0.120172	0.120172	0.120172	0.120172	0.120172	0.120172	0.120172	0.120172	0.120172	0.120172	0.120172	0.120172	0.120172
ArcelorMittal S.A.	SFR00002			ArcelorMittal Méditerranée Fos sur Mer steel plant	France	ArcelorMittal SA [100%]	1	4000	4000	4000		N/A	N/A	integrated (BF)	BF, BOF	operating					4.98915	4.81714	4.28427	4.06029	4.53771	4.53771	4.53771	4.53771	4.53771	4.53771	4.53771	2.26886	2.26886	2.26886	2.26886	2.26886	2.26886	2.26886	2.26886	2.26886	2.26886	2.26886	2.26886	2.26886	2.26886	2.26886	2.26886	2.26886	2.26886
ArcelorMittal S.A.	SFR00002-1			Dummy - ArcelorMittal Méditerranée Fos sur Mer steel plant transition (EAF addition)	France	ArcelorMittal SA [100%]	1	2000	2000	N/A		N/A	2000	electric	EAF	announced					0	0	0	0	0	0	0	0.0512736	0.0512736	0.0512736	0.0512736	0.0512736	0.0512736	0.0512736	0.0512736	0.0512736	0.0512736	0.0512736	0.0512736	0.0512736	0.0512736	0.0512736	0.0512736	0.0512736	0.0512736	0.0512736	0.0512736	0.0512736	0.0512736
ArcelorMittal S.A.	SDE00003			AG der Dillinger Hüttenwerke Dillingen steel plant	Germany	SHS Stahl Holding Saar GmbH & Co KgaA [57.2%]; ArcelorMittal SA [33.4%]; Saarstahl AG [9.4%]	0.334	2760	921.84	4790		N/A	N/A	integrated (BF)	BF, BOF	operating					1.1498	1.11016	0.987353	0.935734	1.04576	1.04576	1.04576	0.382688	0.382688	0.382688	0.382688	0.382688	0.382688	0.382688	0.382688	0.382688	0.382688	0.382688	0.382688	0.382688	0.382688	0.382688	0.382688	0.382688	0.382688	0.382688	0.382688	0.382688	0.382688
ArcelorMittal S.A.	SDE00003-1			Dummy - AG der Dillinger Hüttenwerke Dillingen steel plant transition (DRI-EAF addition)	Germany	SHS Stahl Holding Saar GmbH & Co KgaA [57.2%]; ArcelorMittal SA [33.4%]; Saarstahl AG [9.4%]	0.334	1750	584.5	N/A		2500	1750	integrated (DRI)	DRI, EAF	announced					0	0	0	0	0	0	0	0.393349	0.393349	0.393349	0.0280963	0.0280963	0.0280963	0.0280963	0.0280963	0.0280963	0.0280963	0.0280963	0.0280963	0.0280963	0.0280963	0.0280963	0.0280963	0.0280963	0.0280963	0.0280963	0.0280963	0.0280963	0.0280963
ArcelorMittal S.A.	SDE00006			ArcelorMittal Bremen steel plant	Germany	ArcelorMittal SA [100%]	1	3800	3800	3800		N/A	N/A	integrated (BF)	BF, BOF	operating					4.24078	4.09457	3.64163	3.45125	3.85706	3.85706	3.85706	3.85706	3.85706	3.85706	1.87181	1.87181	1.87181	1.87181	1.87181	1.87181	1.87181	1.87181	1.87181	1.87181	1.87181	1.87181	1.87181	1.87181	1.87181	1.87181	1.87181	1.87181	1.87181
ArcelorMittal S.A.	SDE00006-1			Dummy - ArcelorMittal Bremen steel plant transition (DRI-EAF addition)	Germany	ArcelorMittal SA [100%]	1	1750	1750	N/A		2000	1750	integrated (DRI)	DRI, EAF	announced					0	0	0	0	0	0	0	0	0	0	0.0841207	0.0841207	0.0841207	0.0841207	0.0841207	0.0841207	0.0841207	0.0841207	0.0841207	0.0841207	0.0841207	0.0841207	0.0841207	0.0841207	0.0841207	0.0841207	0.0841207	0.0841207	0.0841207
ArcelorMittal S.A.	SDE00008			ArcelorMittal Duisburg steel plant	Germany	ArcelorMittal SA [100%]	1	1300	1300	N/A		N/A	N/A	oxygen	BOF	operating					0.183217	0.176901	0.157332	0.149107	0.166639	0.166639	0.166639	0.166639	0.166639	0	0	0	0	0	0	0	0	0	0	0	0	0	0	0	0	0	0	0	0
ArcelorMittal S.A.	SDE00008-1			Dummy - ArcelorMittal Duisburg steel plant transition (EAF addition)	Germany	ArcelorMittal SA [100%]	1	1300	1300	N/A		N/A	1300	electric	EAF	announced					0	0	0	0	0	0	0	0	0	0.0256368	0.0256368	0.0256368	0.0256368	0.0256368	0.0256368	0.0256368	0.0256368	0.0256368	0.0256368	0.0256368	0.0256368	0.0256368	0.0256368	0.0256368	0.0256368	0.0256368	0.0256368	0.0256368	0.0256368
ArcelorMittal S.A.	SDE00005			ArcelorMittal Eisenhüttenstadt steel plant	Germany	ArcelorMittal SA [100%]	1	2400	2400	1825		N/A	N/A	integrated (BF)	BF, BOF	operating					2.99349	2.89028	2.57056	2.43617	2.72263	2.72263	2.72263	2.72263	2.72263	2.72263	0	0	0	0	0	0	0	0	0	0	0	0	0	0	0	0	0	0	0
ArcelorMittal S.A.	SDE00005-1			Dummy - ArcelorMittal Eisenhüttenstadt steel plant transition (DRI-EAF addition)	Germany	ArcelorMittal SA [100%]	1	1750	1750	N/A		>0	1750	integrated (DRI)	DRI, EAF	announced					0	0	0	0	0	0	0	0	0	0	0.0841207	0.0841207	0.0841207	0.0841207	0.0841207	0.0841207	0.0841207	0.0841207	0.0841207	0.0841207	0.0841207	0.0841207	0.0841207	0.0841207	0.0841207	0.0841207	0.0841207	0.0841207	0.0841207
ArcelorMittal S.A.	SDE00007			ArcelorMittal Hamburg steel plant	Germany	ArcelorMittal SA [100%]	1	1100	1100	N/A		600	1100	integrated (DRI)	DRI, EAF	operating					0.44395	0.428644	0.381227	0.361297	0.403779	0.403779	0.471076	0.471076	0.471076	0.471076	0.0624897	0.0624897	0.0624897	0.0624897	0.0624897	0.0624897	0.0624897	0.0624897	0.0624897	0.0624897	0.0624897	0.0624897	0.0624897	0.0624897	0.0624897	0.0624897	0.0624897	0.0624897	0.0624897
ArcelorMittal S.A.	SDE00007			ArcelorMittal Hamburg steel plant (scrap-EAF)	Germany	ArcelorMittal SA [100%]	1						1100	electric	EAF	operating					0.0140936	0.0136077	0.0121025	0.0114697	0.0128184	0.0128184	0.0128184	0.0128184	0.0128184	0.0128184	0.0128184	0.0128184	0.0128184	0.0128184	0.0128184	0.0128184	0.0128184	0.0128184	0.0128184	0.0128184	0.0128184	0.0128184	0.0128184	0.0128184	0.0128184	0.0128184	0.0128184	0.0128184	0.0128184
ArcelorMittal S.A.	SIN00066			ArcelorMittal Nippon Steel Kendrapara plant	India	ArcelorMittal SA [60%]; Nippon Steel Corp [40%]	0.6	14000	8400	unknown		unknown	N/A	integrated (BF)	BOF	announced					0	0	0	0	0	0	0	0	20.0275	20.0275	20.0275	20.0275	20.0275	20.0275	20.0275	20.0275	20.0275	20.0275	20.0275	20.0275	20.0275	20.0275	20.0275	20.0275	20.0275	20.0275	20.0275	20.0275	20.0275
ArcelorMittal S.A.	SIN00004			ArcelorMittal Nippon Steel India Hazira Plant	India	ArcelorMittal SA [60%]; Nippon Steel Corp [40%]	0.6	9600	5760	2040		7830	9600	integrated (BF-EAF)	BF, DRI, EAF	operating					3.20862	3.09799	2.75529	2.61125	2.91829	2.91829	2.91829	2.91829	2.91829	2.91829	2.91829	2.91829	2.91829	2.91829	2.91829	2.91829	2.91829	2.91829	2.91829	2.91829	2.91829	2.91829	2.91829	2.91829	2.91829	2.91829	2.91829	2.91829	2.91829
ArcelorMittal S.A.	SIN00004			ArcelorMittal Nippon Steel India Hazira Plant	India	ArcelorMittal SA [60%]; Nippon Steel Corp [40%]	0.6					7830		integrated (DRI)	DRI, EAF	operating					3.47613	3.35628	2.98501	2.82895	3.16159	3.16159	3.16159	3.16159	3.16159	3.16159	3.16159	3.16159	3.16159	3.16159	3.16159	3.16159	3.16159	3.16159	3.16159	3.16159	3.16159	3.16159	3.16159	3.16159	3.16159	3.16159	3.16159	3.16159	3.16159
ArcelorMittal S.A.	SIN00004			ArcelorMittal Nippon Steel India Hazira Plant	India	ArcelorMittal SA [60%]; Nippon Steel Corp [40%]	0.6				6000			integrated (BF)	BF, BOF	construction					0	0	0	0	0	10.0137	10.0137	10.0137	10.0137	22.0302	22.0302	22.0302	22.0302	22.0302	22.0302	22.0302	22.0302	22.0302	22.0302	22.0302	22.0302	22.0302	22.0302	22.0302	22.0302	22.0302	22.0302	22.0302	22.0302
ArcelorMittal S.A.				ArcelorMittal Nippon Steel Paradip Steel Plant	India	ArcelorMittal SA [60%]; Nippon Steel Corp [40%]	0.6	7000	4200					integrated (BF)	BF, BOF	announced					0	0	0	0	0	0	0	0	0	10.0137	10.0137	10.0137	10.0137	10.0137	10.0137	10.0137	10.0137	10.0137	10.0137	10.0137	10.0137	10.0137	10.0137	10.0137	10.0137	10.0137	10.0137	10.0137	10.0137
ArcelorMittal S.A.	SIT00003			ArcelorMittal Acciaierie d'Italia Taranto steel plant	Italy	ArcelorMittal SA [40%]; Acciaierie d'italia SpA [60%]	0.4	11500	4600	9500		N/A	N/A	integrated (BF)	BF, BOF	operating					5.73752	5.53971	4.92691	4.66933	0	0	0	0	0	0	0	0	0	0	0	0	0	0	0	0	0	0	0	0	0	0	0	0	0
ArcelorMittal S.A.	SKZ00001			ArcelorMittal Temirtau steel plant	Kazakhstan	ArcelorMittal SA [100%]	1	6000	6000	5125		N/A	N/A	integrated (BF)	BF, BOF	operating					9.78199	9.44475	8.39997	7.96082	8.89688	8.89688	8.89688	8.89688	8.89688	8.89688	8.89688	8.89688	8.89688	8.89688	8.89688	8.89688	8.89688	8.89688	8.89688	8.89688	8.89688	8.89688	8.89688	8.89688	8.89688	8.89688	8.89688	8.89688	8.89688
ArcelorMittal S.A.	SLU00001			ArcelorMittal Differdange steel plant	Luxembourg	ArcelorMittal SA [100%]	1	2000	2000	N/A		N/A	2000	electric	EAF	operating					0.0563746	0.054431	0.0484098	0.045879	0.0512736	0.0512736	0.0512736	0.0512736	0.0512736	0.0512736	0.0512736	0.0512736	0.0512736	0.0512736	0.0512736	0.0512736	0.0512736	0.0512736	0.0512736	0.0512736	0.0512736	0.0512736	0.0512736	0.0512736	0.0512736	0.0512736	0.0512736	0.0512736	0.0512736
ArcelorMittal S.A.	SLU00002			ArcelorMittal Esch-Belval steel plant	Luxembourg	ArcelorMittal SA [100%]	1	1000	1000	N/A		N/A	1000	electric	EAF	operating					0.0281873	0.0272155	0.0242049	0.0229395	0.0256368	0.032046	0.032046	0.032046	0.032046	0.032046	0.032046	0.032046	0.032046	0.032046	0.032046	0.032046	0.032046	0.032046	0.032046	0.032046	0.032046	0.032046	0.032046	0.032046	0.032046	0.032046	0.032046	0.032046	0.032046
ArcelorMittal S.A.	SMX00002			ArcelorMittal Lázaro Cárdenas steel plant	Mexico	ArcelorMittal SA [100%]	1	6400	6400	1451.91	2400	3200	4000	integrated (BF)	BF, BOF	operating					3.9128	3.7779	3.35999	3.18433	3.55875	3.55875	3.55875	3.55875	3.55875	3.55875	3.55875	3.55875	3.55875	3.55875	3.55875	3.55875	3.55875	3.55875	3.55875	3.55875	3.55875	3.55875	3.55875	3.55875	3.55875	3.55875	3.55875	3.55875	3.55875
ArcelorMittal S.A.	SMX00002			ArcelorMittal Lázaro Cárdenas steel plant (DRI-EAF)	Mexico	ArcelorMittal SA [100%]	1					3200	4000	integrated (DRI)	DRI, EAF	operating					2.95967	2.85763	2.54152	2.40865	2.69186	2.69186	2.69186	2.69186	2.69186	2.69186	2.69186	2.69186	2.69186	2.69186	2.69186	2.69186	2.69186	2.69186	2.69186	2.69186	2.69186	2.69186	2.69186	2.69186	2.69186	2.69186	2.69186	2.69186	2.69186
ArcelorMittal S.A.	SMA00002			ArcelorMittal Sonasid Casablanca steel plant	Morocco	ArcelorMittal SA [100%]	1	800	800	N/A		N/A	800	electric	EAF	operating					0.0289389	0.0279412	0.0248504	0.0235512	0.0263204	0.0263204	0.0263204	0.0263204	0.0263204	0.0263204	0.0263204	0.0263204	0.0263204	0.0263204	0.0263204	0.0263204	0.0263204	0.0263204	0.0263204	0.0263204	0.0263204	0.0263204	0.0263204	0.0263204	0.0263204	0.0263204	0.0263204	0.0263204	0.0263204
ArcelorMittal S.A.	SPL00001			ArcelorMittal Dąbrowa Górnicza steel plant	Poland	ArcelorMittal SA [100%]	1	5000	5000	4500		N/A	N/A	integrated (BF)	BF, BOF	operating					6.23644	6.02143	5.35534	5.07536	5.67214	5.67214	5.67214	5.67214	5.67214	5.67214	5.67214	5.67214	5.67214	5.67214	5.67214	5.67214	5.67214	5.67214	5.67214	5.67214	5.67214	5.67214	5.67214	5.67214	5.67214	5.67214	5.67214	5.67214	5.67214
ArcelorMittal S.A.	SPL00006			ArcelorMittal Warszawa steel plant	Poland	ArcelorMittal SA [100%]	1	750	750	N/A		N/A	750	electric	EAF	operating					0.0211405	0.0204116	0.0181537	0.0172046	0.0192276	0.0192276	0.0192276	0.0192276	0.0192276	0.0192276	0.0192276	0.0192276	0.0192276	0.0192276	0.0192276	0.0192276	0.0192276	0.0192276	0.0192276	0.0192276	0.0192276	0.0192276	0.0192276	0.0192276	0.0192276	0.0192276	0.0192276	0.0192276	0.0192276
ArcelorMittal S.A.	SRO00002			ArcelorMittal Hunedoara steel plant	Romania	ArcelorMittal Hunedoara SA [100%]	1	800	800	N/A		N/A	800	electric	EAF	operating					0.0225498	0.0217724	0.0193639	0.0183516	0.0205094	0.0205094	0.0205094	0.0205094	0.0205094	0.0205094	0.0205094	0.0205094	0.0205094	0.0205094	0.0205094	0.0205094	0.0205094	0.0205094	0.0205094	0.0205094	0.0205094	0.0205094	0.0205094	0.0205094	0.0205094	0.0205094	0.0205094	0.0205094	0.0205094
ArcelorMittal S.A.	SZA00001			ArcelorMittal Newcastle Steel Works	South Africa	Arcelormittal South Africa Ltd [100%]	1	1900	1900	2044		N/A	N/A	integrated (BF)	BF, BOF	operating					3.30862	3.19455	2.84117	2.69263	0	0	0	0	0	0	0	0	0	0	0	0	0	0	0	0	0	0	0	0	0	0	0	0	0
ArcelorMittal S.A.	SZA00004			ArcelorMittal Saldanha Steel Works	South Africa	Arcelormittal South Africa Ltd [100%]	1	1200	1200	760		800	1200	ironmaking (DRI)	BF, DRI, EAF	mothballed					0	0	0	0	0	0	0	0	0	0.312769	0.0384552	0.0384552	0.0384552	0.0384552	0.0384552	0.0384552	0.0384552	0.0384552	0.0384552	0.0384552	0.0384552	0.0384552	0.0384552	0.0384552	0.0384552	0.0384552	0.0384552	0.0384552	0.0384552
ArcelorMittal S.A.	SZA00002			ArcelorMittal Vanderbijlpark Steel Works	South Africa	Arcelormittal South Africa Ltd [100%]	1	4500	4500	3200		950	N/A	integrated (BF)	BF, BOF, DRI	operating					5.92069	5.71656	5.0842	4.81839	5.38496	5.38496	5.38496	5.38496	5.38496	5.38496	2.69248	2.69248	2.69248	2.69248	2.69248	2.69248	2.69248	2.69248	2.69248	2.69248	2.69248	2.69248	2.69248	2.69248	2.69248	2.69248	2.69248	2.69248	2.69248
ArcelorMittal S.A.	SZA00002			Dummy - ArcelorMittal Vanderbijlpark Steel Works transition (EAF addition)	South Africa	Arcelormittal South Africa Ltd [100%]	0.6922	1700	1176.74		N/A		1700	electric	EAF	announced					0	0	0	0	0	0	0	0	0	0	0.0905035	0.0905035	0.0905035	0.0905035	0.0905035	0.0905035	0.0905035	0.0905035	0.0905035	0.0905035	0.0905035	0.0905035	0.0905035	0.0905035	0.0905035	0.0905035	0.0905035	0.0905035	0.0905035
ArcelorMittal S.A.	SES00001			ArcelorMittal Asturias (Gijón) steel plant	Spain	ArcelorMittal SA [100%]	1	1200	1200	4200		N/A	N/A	integrated (BF)	BF, BOF	operating					1.49674	1.44514	1.28528	1.21809	1.36131	1.36131	1.36131	1.36131	1.36131	0	0	0	0	0	0	0	0	0	0	0	0	0	0	0	0	0	0	0	0
ArcelorMittal S.A.	SES00001			Dummy - ArcelorMittal Asturias (Gijón) steel plant EAF expansion	Spain	ArcelorMittal SA [100%]	1							electric	EAF	construction					0	0	0	0	0	0	0.0282005	0.0282005	0.0282005	0	0	0	0	0	0	0	0	0	0	0	0	0	0	0	0	0	0	0	0
ArcelorMittal S.A.	SES00001			Dummy - ArcelorMittal Asturias (Gijón) steel plant DRI expansion	Spain	ArcelorMittal SA [100%]	1							integrated (DRI)	DRI, EAF	announced					0	0	0	0	0	0	0	0	0	1.54782	0.110559	0.110559	0.110559	0.110559	0.110559	0.110559	0.110559	0.110559	0.110559	0.110559	0.110559	0.110559	0.110559	0.110559	0.110559	0.110559	0.110559	0.110559	0.110559
ArcelorMittal S.A.	SES00007			ArcelorMittal Olaberria-Bergara (Olaberria) steel plant	Spain	ArcelorMittal SA [100%]	1	1450	1450	N/A		N/A	1450	electric	EAF	operating					0.0408716	0.0394625	0.0350971	0.0332623	0.0371734	0.0371734	0.0371734	0.0371734	0.0371734	0.0371734	0.0371734	0.0371734	0.0371734	0.0371734	0.0371734	0.0371734	0.0371734	0.0371734	0.0371734	0.0371734	0.0371734	0.0371734	0.0371734	0.0371734	0.0371734	0.0371734	0.0371734	0.0371734	0.0371734
ArcelorMittal S.A.	SES00008			ArcelorMittal Asturias (Avilés) steel plant	Spain	ArcelorMittal SA [100%]	1	4200	4200	N/A		N/A	N/A	oxygen	BOF	operating					0.591933	0.571525	0.508303	0.481729	0.538373	0.538373	0.538373	0.538373	0.538373	0.269186	0.269186	0.269186	0.269186	0.269186	0.269186	0.269186	0.269186	0.269186	0.269186	0.269186	0.269186	0.269186	0.269186	0.269186	0.269186	0.269186	0.269186	0.269186	0.269186
ArcelorMittal S.A.	SES00002			ArcelorMittal Sestao steel plant	Spain	ArcelorMittal SA [100%]	1	2000	2000	N/A		N/A	2000	electric	EAF	operating					0.0563746	0.054431	0.0484098	0.045879	0.0512736	0.0512736	0.0512736	0.0512736	0.0512736	0.0256368	0.0256368	0.0256368	0.0256368	0.0256368	0.0256368	0.0256368	0.0256368	0.0256368	0.0256368	0.0256368	0.0256368	0.0256368	0.0256368	0.0256368	0.0256368	0.0256368	0.0256368	0.0256368	0.0256368
ArcelorMittal S.A.	SUA00002			ArcelorMittal Kryvyi Rih steel plant	Ukraine	ArcelorMittal SA [100%]	1	8000	8000	11450		N/A	N/A	integrated (BF)	BF, BOF, OHF	operating					12.9662	12.5191	3.34028	3.16565	3.53788	3.53788	3.53788	3.53788	3.53788	3.53788	3.53788	3.53788	3.53788	3.53788	3.53788	3.53788	3.53788	3.53788	3.53788	3.53788	3.53788	3.53788	3.53788	3.53788	3.53788	3.53788	3.53788	3.53788	3.53788
ArcelorMittal S.A.	SUS00081			AM/NS Calvert LLC	United States	ArcelorMittal SA [50%]; Nippon Steel Corp [50%]	0.5	1500	750	N/A		N/A	1500	electric	EAF	operating					0	0	0	0.0172046	0.0192276	0.0192276	0.0192276	0.0192276	0.0192276	0.0192276	0.0192276	0.0192276	0.0192276	0.0192276	0.0192276	0.0192276	0.0192276	0.0192276	0.0192276	0.0192276	0.0192276	0.0192276	0.0192276	0.0192276	0.0192276	0.0192276	0.0192276	0.0192276	0.0192276
ArcelorMittal S.A.	SUS00053			ArcelorMittal Texas DRI plant	United States	ArcelorMittal SA [80%]; voestalpine AG [20%]	0.8	N/A	1600	N/A		2000	N/A	ironmaking (DRI)	DRI	operating					0	0	0.5906	0.559723	0.625538	0.625538	0.625538	0.625538	0.625538	0.625538	0.625538	0.625538	0.625538	0.625538	0.625538	0.625538	0.625538	0.625538	0.625538	0.625538	0.625538	0.625538	0.625538	0.625538	0.625538	0.625538	0.625538	0.625538	0.625538
Total CO2 emissions																					113.75	109.828	90.4757	89.5306	91.8303	101.85	103.35	99.7599	117.844	139.909	125.777	123.508	123.508	123.508	123.508	123.508	123.508	123.508	123.508	123.508	123.508	123.508	123.508	123.508	123.508	123.508	123.508	123.508	123.508
[truncated: 2 more columns]

## Sheet: Baoshan Iron & Steel_Output
	Emissions																																	BAU		Stated TP
		2020	2021	2022	2023	2024	2025	2026	2027	2028	2029	2030	2031	2032	2033	2034	2035	2036	2037	2038	2039	2040	2041	2042	2043	2044	2045	2046	2047	2048	2049	2050	Cumulative Emissions	Overshoot	% overshoot	Overshoot	% overshoot
	Baoshan Iron & Steel - Absolute CO2 emissions (BAU)	83.464	83.464	88.8519	85.2599	84.1811	84.1811	84.1811	84.1811	84.1811	84.1811	84.1811	84.1811	84.1811	84.1811	84.1811	82.6995	82.6995	82.6995	82.6995	82.6995	82.6995	82.6995	82.6995	82.6995	82.6995	82.6995	82.6995	82.6995	82.6995	82.6995	82.6995	2590.22
	Baoshan Iron & Steel - Absolute CO2 emissions (TP)	83.464	83.464	88.8519	85.2599	82.5583	82.5583	82.5583	82.5583	82.5583	82.5583	80.4488	80.4488	80.4488	80.4488	80.4488	78.9672	78.9672	78.9672	78.9672	78.9672	78.9672	78.9672	78.9672	78.9672	78.9672	78.9672	78.9672	78.9672	78.9672	78.9672	78.9672	2502.11
	Baoshan Iron & Steel - Absolute CO2 emissions (REMIND Net Zero 2050 benchmark)	83.464	79.0748	74.6856	70.2964	65.9071	61.5179	54.1219	46.7259	39.3299	31.9339	24.5379	21.2341	17.9303	14.6264	11.3226	8.01877	6.9095	5.80024	4.69097	3.5817	2.47243	2.16259	1.85275	1.54291	1.23308	0.923237	0.838792	0.754347	0.669902	0.585457	0.501012	739.247	1850.98	2.50387	1762.86	2.38468
	Baoshan Iron & Steel - Absolute CO2 emissions (REMIND Below 2°C benchmark)	83.464	81.4466	79.4292	77.4118	75.3944	73.377	68.8508	64.3246	59.7984	55.2723	50.7461	48.2625	45.7788	43.2952	40.8116	38.328	34.4057	30.4834	26.561	22.6387	18.7164	17.1074	15.4985	13.8895	12.2806	10.6716	10.0129	9.35423	8.69555	8.03687	7.37819	1231.72	1358.5	1.10293	1270.39	1.03139
	Baoshan Iron & Steel - Absolute CO2 emissions (GCAM 6.0 NGFS Net Zero 2050 benchmark)	83.464	81.5416	79.6192	77.6969	75.7745	73.8521	67.9607	62.0692	56.1777	50.2862	44.3948	39.6868	34.9788	30.2709	25.5629	20.8549	18.7063	16.5577	14.409	12.2604	10.1118	9.13885	8.16594	7.19302	6.2201	5.24719	5.01963	4.79206	4.5645	4.33694	4.10938	1035.02	1555.2	1.50257	1467.09	1.41744
	Baoshan Iron & Steel - Absolute CO2 emissions (GCAM 6.0 NGFS Below 2°C benchmark)	83.464	81.8195	80.175	78.5305	76.886	75.2415	70.3411	65.4406	60.5402	55.6397	50.7393	46.477	42.2148	37.9525	33.6903	29.428	27.268	25.1081	22.9481	20.7882	18.6282	17.195	15.7618	14.3286	12.8954	11.4622	10.6127	9.76331	8.91389	8.06446	7.21503	1199.53	1390.69	1.15936	1302.58	1.0859
	Baoshan Iron & Steel - Absolute CO2 emissions (MESSAGEix Net Zero 2050 benchmark)	83.464	84.2572	85.0503	85.8435	86.6367	87.4299	86.2461	85.0623	83.8784	82.6946	81.5108	80.0714	78.6321	77.1927	75.7533	74.3139	72.6953	71.0766	69.458	67.8393	66.2207	65.0595	63.8982	62.737	61.5758	60.4146	59.1159	57.8172	56.5185	55.2198	53.9211	2261.6	328.619	0.145303	240.505	0.106343
	Baoshan Iron & Steel - Absolute CO2 emissions (MESSAGEix Below 2°C benchmark)	83.464	84.2572	85.0503	85.8435	86.6367	87.4299	86.5727	85.7155	84.8583	84.0011	83.144	82.4239	81.7039	80.9839	80.2639	79.5439	78.137	76.7301	75.3232	73.9163	72.5094	71.4834	70.4574	69.4315	68.4055	67.3795	66.2644	65.1492	64.034	62.9188	61.8036	2385.84	204.388	0.085667	116.274	0.048735

## Sheet: Baoshan Iron & Steel_BAU
Company name (CA100+)	GEM Plant ID	GEM Unit ID	Unit name	Plant name (English)	Country	Parent [formula]	Ownership share	Total nominal crude steel capacity (ttpa)	Owned nominal crude steel capacity (ttpa)	Nominal BF capacity (ttpa)	Nominal BOF capacity (ttpa)	Nominal DRI capacity (ttpa)	Nominal EAF steel capacity (ttpa)	Main production process	Main production equipment	Status	Plant/Unit - Start date	Last relining (year)	Announced phase-out (year)	Relining required (year)	2020	2021	2022	2023	2024	2025	2026	2027	2028	2029	2030	2031	2032	2033	2034	2035	2036	2037	2038	2039	2040	2041	2042	2043	2044	2045	2046	2047	2048
Baoshan Iron & Steel Co Ltd	SCN00021			Baosteel Zhanjiang Iron & Steel Co., Ltd. (Dongshan Base)	China	Baoshan Iron and Steel Co., Ltd. [90%]; Guangdong Hengjian Investment Holdings Co Ltd [10%]	0.9	12528	11275.2	12250		N/A	N/A	integrated (BF)	BF, BOF	operating					11275.2	11275.2	11275.2	11275.2	9655.2	9655.2	9655.2	9655.2	9655.2	9655.2	9655.2	9655.2	9655.2	9655.2	9655.2	9655.2	9655.2	9655.2	9655.2	9655.2	9655.2	9655.2	9655.2	9655.2	9655.2	9655.2	9655.2	9655.2	9655.2
Baoshan Iron & Steel Co Ltd	SCN00021			Dummy - Baosteel Zhanjiang Iron & Steel Co., Ltd. (Dongshan Base)	China	Baoshan Iron and Steel Co., Ltd. [90%]; Guangdong Hengjian Investment Holdings Co Ltd [10%]	0.9					1000		integrated (DRI)	DRI, EAF	operating	2023-12-01				0	0	0	0	1620	1620	1620	1620	1620	1620	1620	1620	1620	1620	1620	1620	1620	1620	1620	1620	1620	1620	1620	1620	1620	1620	1620	1620	1620
Baoshan Iron & Steel Co Ltd	SCN00021	U000116	1		China	Baoshan Iron and Steel Co., Ltd. [90%]; Guangdong Hengjian Investment Holdings Co Ltd [10%]	0.9	4115	3703.5	4115					BF	operating	2015-09-25	2015	N/A	2035	3703.5	3703.5	3703.5	3703.5	3703.5	3703.5	3703.5	3703.5	3703.5	3703.5	3703.5	3703.5	3703.5	3703.5	3703.5	3703.5	3703.5	3703.5	3703.5	3703.5	3703.5	3703.5	3703.5	3703.5	3703.5	3703.5	3703.5	3703.5	3703.5
Baoshan Iron & Steel Co Ltd	SCN00021	U000117	2		China	Baoshan Iron and Steel Co., Ltd. [90%]; Guangdong Hengjian Investment Holdings Co Ltd [10%]	0.9	4115	3703.5	4115					BF	operating	2016-07-15	2016	N/A	2036	3703.5	3703.5	3703.5	3703.5	3703.5	3703.5	3703.5	3703.5	3703.5	3703.5	3703.5	3703.5	3703.5	3703.5	3703.5	3703.5	3703.5	3703.5	3703.5	3703.5	3703.5	3703.5	3703.5	3703.5	3703.5	3703.5	3703.5	3703.5	3703.5
Baoshan Iron & Steel Co Ltd	SCN00021	U000118	3		China	Baoshan Iron and Steel Co., Ltd. [90%]; Guangdong Hengjian Investment Holdings Co Ltd [10%]	0.9	4020	3618	4020					BF	operating	January 2022	2022	N/A	2042	0	0	3618	3618	3618	3618	3618	3618	3618	3618	3618	3618	3618	3618	3618	3618	3618	3618	3618	3618	3618	3618	3618	3618	3618	3618	3618	3618	3618
Baoshan Iron & Steel Co Ltd	SCN00021-1			Baosteel Zhanjiang Iron & Steel Co., Ltd. DRI expansion	China	Baoshan Iron and Steel Co., Ltd. [90%]; Guangdong Hengjian Investment Holdings Co Ltd [10%]	0.9	1800	1620	N/A		1000	N/A	ironmaking (H2-DRI)	DRI	operating	2023-12-01				0	0	0	0	1620	1620	1620	1620	1620	1620	1620	1620	1620	1620	1620	1620	1620	1620	1620	1620	1620	1620	1620	1620	1620	1620	1620	1620	1620
Baoshan Iron & Steel Co Ltd	SCN00111			Wuhan Iron and Steel Co., Ltd. (Qingshan Base)	China	Baoshan Iron and Steel Co., Ltd. [100%]	1	15910	15910	14200		unknown	N/A	integrated (BF)	BF, BOF	operating					15910	15910	15910	15910	15910	15910	15910	15910	15910	15910	15910	15910	15910	15910	15910	15910	15910	15910	15910	15910	15910	15910	15910	15910	15910	15910	15910	15910	15910
Baoshan Iron & Steel Co Ltd	SCN00111	U000416	4		China	Baoshan Iron and Steel Co., Ltd. [100%]	1	0	0	2365					BF	operating	April 1970	2007	N/A	2027	2365	2365	2365	2365	2365	2365	2365	2365	2365	2365	2365	2365	2365	2365	2365	2365	2365	2365	2365	2365	2365	2365	2365	2365	2365	2365	2365	2365	2365
Baoshan Iron & Steel Co Ltd	SCN00111	U000417	5		China	Baoshan Iron and Steel Co., Ltd. [100%]	1	0	0	2920					BF	operating	1991-10-01	2007	N/A	2027	2920	2920	2920	2920	0	0	0	0	0	0	0	0	0	0	0	0	0	0	0	0	0	0	0	0	0	0	0	0	0
Baoshan Iron & Steel Co Ltd	SCN00111	U000418	6		China	Baoshan Iron and Steel Co., Ltd. [100%]	1	0	0	2686.4					BF	operating	2004-07-16	2004	N/A	2024	2686.4	2686.4	2686.4	2686.4	0	0	0	0	0	0	0	0	0	0	0	0	0	0	0	0	0	0	0	0	0	0	0	0	0
Baoshan Iron & Steel Co Ltd	SCN00111	U000419	7		China	Baoshan Iron and Steel Co., Ltd. [100%]	1	0	0	2840					BF	operating	2006-06-28	2006	N/A	2026	2840	2840	2840	2840	2840	2840	2840	2840	2840	2840	2840	2840	2840	2840	2840	2840	2840	2840	2840	2840	2840	2840	2840	2840	2840	2840	2840	2840	2840
Baoshan Iron & Steel Co Ltd	SCN00111	U000420	8		China	Baoshan Iron and Steel Co., Ltd. [100%]	1	0	0	3561.9					BF	operating	2009-08-02	2009	N/A	2029	3561.9	3561.9	3561.9	3561.9	3561.9	3561.9	3561.9	3561.9	3561.9	3561.9	3561.9	3561.9	3561.9	3561.9	3561.9	3561.9	3561.9	3561.9	3561.9	3561.9	3561.9	3561.9	3561.9	3561.9	3561.9	3561.9	3561.9	3561.9	3561.9
Baoshan Iron & Steel Co Ltd	SCN00111-1			Wuhan Iron and Steel Co., Ltd. BF expansion	China	Baoshan Iron and Steel Co., Ltd. [100%]	1	N/A	N/A	5340		unknown	N/A	ironmaking (BF)	BF	announced					0	0	0	0	0	0	0	0	0	0	0
Baoshan Iron & Steel Co Ltd	SCN00111-1	U000421	unknown	Wuhan Iron and Steel Co., Ltd. BF expansion	China	Baoshan Iron and Steel Co., Ltd. [100%]	1	0	0	2670					BF	announced	2023	NA	N/A	2023	0	0	0	0	2670	2670	2670	2670	2670	2670	2670	2670	2670	2670	2670	2670	2670	2670	2670	2670	2670	2670	2670	2670	2670	2670	2670	2670	2670
Baoshan Iron & Steel Co Ltd	SCN00111-1	U000422	unknown	Wuhan Iron and Steel Co., Ltd. BF expansion	China	Baoshan Iron and Steel Co., Ltd. [100%]	1	0	0	2670					BF	announced	2023	NA	N/A	2023	0	0	0	0	2670	2670	2670	2670	2670	2670	2670	2670	2670	2670	2670	2670	2670	2670	2670	2670	2670	2670	2670	2670	2670	2670	2670	2670	2670
Baoshan Iron & Steel Co Ltd	SCN00161			Shanghai Meishan Iron and Steel Co., Ltd. (Meishan Base)	China	China Baowu Iron and Steel Group Co., Ltd. [50.9%]; Other [49.1%]	0.77	7600	5852	7600		N/A	N/A	integrated (BF)	BF, BOF	operating	1969				5852	5852	5852	5852	5852	5852	5852	5852	5852	5852	5852	5852	5852	5852	5852	5852	5852	5852	5852	5852	5852	5852	5852	5852	5852	5852	5852	5852	5852
Baoshan Iron & Steel Co Ltd	SCN00162	U000544	unknown		China	China Baowu Iron and Steel Group Co., Ltd. [50.9%]; Other [49.1%]	0.77	1092.87	841.506	1092.87					BF	operating	unknown	NA	N/A	2023	841.506	841.506	841.506	841.506	841.506	841.506	841.506	841.506	841.506	841.506	841.506	841.506	841.506	841.506	841.506	841.506	841.506	841.506	841.506	841.506	841.506	841.506	841.506	841.506	841.506	841.506	841.506	841.506	841.506
Baoshan Iron & Steel Co Ltd	SCN00163	U000545	unknown		China	China Baowu Iron and Steel Group Co., Ltd. [50.9%]; Other [49.1%]	0.77	2732.16	2103.77	2732.16					BF	operating	unknown	NA	N/A	2023	2103.77	2103.77	2103.77	2103.77	2103.77	2103.77	2103.77	2103.77	2103.77	2103.77	2103.77	2103.77	2103.77	2103.77	2103.77	2103.77	2103.77	2103.77	2103.77	2103.77	2103.77	2103.77	2103.77	2103.77	2103.77	2103.77	2103.77	2103.77	2103.77
Baoshan Iron & Steel Co Ltd	SCN00164	U000546	unknown		China	China Baowu Iron and Steel Group Co., Ltd. [50.9%]; Other [49.1%]	0.77	3474.97	2675.73	3474.97					BF	operating	unknown	NA	N/A	2023	2675.73	2675.73	2675.73	2675.73	2675.73	2675.73	2675.73	2675.73	2675.73	2675.73	2675.73	2675.73	2675.73	2675.73	2675.73	2675.73	2675.73	2675.73	2675.73	2675.73	2675.73	2675.73	2675.73	2675.73	2675.73	2675.73	2675.73	2675.73	2675.73
Baoshan Iron & Steel Co Ltd	SCN00209			Baoshan Iron and Steel Co., Ltd. (Baoshan Base)	China	Baoshan Iron and Steel Co., Ltd. [100%]	1	18600	18600	19997.6		unknown	2400	integrated (BF)	BF, BOF	operating					16200	16200	16200	16200	16200	16200	16200	16200	16200	16200	16200	16200	16200	16200	16200	16200	16200	16200	16200	16200	16200	16200	16200	16200	16200	16200	16200	16200	16200
Baoshan Iron & Steel Co Ltd	SCN00209			Baoshan Iron and Steel Co., Ltd. (Baoshan Base)	China	Baoshan Iron and Steel Co., Ltd. [100%]	1	18600	18600	19997.6		unknown	2400	integrated (BF-EAF)	BF, EAF	operating					2400	2400	2400	2400	2400	2400	2400	2400	2400	2400	2400	2400	2400	2400	2400	2400	2400	2400	2400	2400	2400	2400	2400	2400	2400	2400	2400	2400	2400
Baoshan Iron & Steel Co Ltd	SCN00209			Dummy - Baoshan Iron and Steel Co., Ltd. (Baoshan Base)	China	Baoshan Iron and Steel Co., Ltd. [100%]	1							electric	EAF	announced					0	0	0	0	0	0	0	0	0	0	0	0	0	0	0	0	0	0	0	0	0	0	0	0	0	0	0	0	0
Baoshan Iron & Steel Co Ltd	SCN00209	U000692	3		China	Baoshan Iron and Steel Co., Ltd. [100%]	1	0	0	3980					BF	operating	1994	2013	N/A	2033	3980	3980	3980	3980	3980	3980	3980	3980	3980	3980	3980	3980	3980	3980	3980	3980	3980	3980	3980	3980	3980	3980	3980	3980	3980	3980	3980	3980	3980
Baoshan Iron & Steel Co Ltd	SCN00209	U000693	2		China	Baoshan Iron and Steel Co., Ltd. [100%]	1	0	0	3770					BF	operating	1991	2021	N/A	2041	3770	3770	3770	3770	3770	3770	3770	3770	3770	3770	3770	3770	3770	3770	3770	3770	3770	3770	3770	3770	3770	3770	3770	3770	3770	3770	3770	3770	3770
Baoshan Iron & Steel Co Ltd	SCN00209	U000694	4#		China	Baoshan Iron and Steel Co., Ltd. [100%]	1	0	0	3500					BF	operating	2005	2005	N/A	2025	3500	3500	3500	3500	3500	3500	3500	3500	3500	3500	3500	3500	3500	3500	3500	3500	3500	3500	3500	3500	3500	3500	3500	3500	3500	3500	3500	3500	3500
Baoshan Iron & Steel Co Ltd	SCN00209	U000695	1#		China	Baoshan Iron and Steel Co., Ltd. [100%]	1	0	0	4050					BF	operating	1985	2009	N/A	2029	4050	4050	4050	4050	4050	4050	4050	4050	4050	4050	4050	4050	4050	4050	4050	4050	4050	4050	4050	4050	4050	4050	4050	4050	4050	4050	4050	4050	4050
Baoshan Iron & Steel Co Ltd	SCN00210			Baosteel Special Steel Co., Ltd.	China	China Baowu Iron and Steel Group Co., Ltd. [100%]	1	500	500				500	electric	EAF	operating	1958				500	500	500	500	500	500	500	500	500	500	500	500	500	500	500	500	500	500	500	500	500	500	500	500	500	500	500	500	500
Capacity projection by main production process
Integrated (BF)																					49237.2	49237.2	49237.2	49237.2	47617.2	47617.2	47617.2	47617.2	47617.2	47617.2	47617.2	47617.2	47617.2	47617.2	47617.2	47617.2	47617.2	47617.2	47617.2	47617.2	47617.2	47617.2	47617.2	47617.2	47617.2	47617.2	47617.2	47617.2	47617.2
Integrated (BF-EAF)																					2400	2400	2400	2400	2400	2400	2400	2400	2400	2400	2400	2400	2400	2400	2400	2400	2400	2400	2400	2400	2400	2400	2400	2400	2400	2400	2400	2400	2400
Electric																					500	500	500	500	500	500	500	500	500	500	500	500	500	500	500	500	500	500	500	500	500	500	500	500	500	500	500	500	500
Direct reduction (DRI-EAF)																					0	0	0	0	1620	1620	1620	1620	1620	1620	1620	1620	1620	1620	1620	1620	1620	1620	1620	1620	1620	1620	1620	1620	1620	1620	1620	1620	1620
Total nominal crude steel production capacity																					52137.2	52137.2	52137.2	52137.2	52137.2	52137.2	52137.2	52137.2	52137.2	52137.2	52137.2	52137.2	52137.2	52137.2	52137.2	52137.2	52137.2	52137.2	52137.2	52137.2	52137.2	52137.2	52137.2	52137.2	52137.2	52137.2	52137.2	52137.2	52137.2
Reported crude steel capacity																						52648	55000
Capacity utilization
Baoshan Iron & Steel Co Ltd	SCN00021			Baosteel Zhanjiang Iron & Steel Co., Ltd. (Dongshan Base)	China	Baoshan Iron and Steel Co., Ltd. [90%]; Guangdong Hengjian Investment Holdings Co Ltd [10%]	0.9	12528	11275.2	12250		N/A	N/A	integrated (BF)	BF, BOF	operating					0.918231	0.918231	0.977506	0.93799	0.93799	0.93799	0.93799	0.93799	0.93799	0.93799	0.93799	0.93799	0.93799	0.93799	0.93799	0.93799	0.93799	0.93799	0.93799	0.93799	0.93799	0.93799	0.93799	0.93799	0.93799	0.93799	0.93799	0.93799	0.93799
Baoshan Iron & Steel Co Ltd	SCN00021			Dummy - Baosteel Zhanjiang Iron & Steel Co., Ltd. (Dongshan Base)	China	Baoshan Iron and Steel Co., Ltd. [90%]; Guangdong Hengjian Investment Holdings Co Ltd [10%]	0.9					1000		integrated (DRI)	DRI, EAF	operating					0.918231	0.918231	0.977506	0.93799	0.93799	0.93799	0.93799	0.93799	0.93799	0.93799	0.93799	0.93799	0.93799	0.93799	0.93799	0.93799	0.93799	0.93799	0.93799	0.93799	0.93799	0.93799	0.93799	0.93799	0.93799	0.93799	0.93799	0.93799	0.93799
Baoshan Iron & Steel Co Ltd	SCN00111			Wuhan Iron and Steel Co., Ltd. (Qingshan Base)	China	Baoshan Iron and Steel Co., Ltd. [100%]	1	15910	15910	14200		unknown	N/A	integrated (BF)	BF, BOF	operating					0.918231	0.918231	0.977506	0.93799	0.93799	0.93799	0.93799	0.93799	0.93799	0.93799	0.93799	0.93799	0.93799	0.93799	0.93799	0.93799	0.93799	0.93799	0.93799	0.93799	0.93799	0.93799	0.93799	0.93799	0.93799	0.93799	0.93799	0.93799	0.93799
Baoshan Iron & Steel Co Ltd	SCN00161			Shanghai Meishan Iron and Steel Co., Ltd. (Meishan Base)	China	China Baowu Iron and Steel Group Co., Ltd. [50.9%]; Other [49.1%]	0.77	7600	5852	7600		N/A	N/A	integrated (BF)	BF, BOF	operating					0.918231	0.918231	0.977506	0.93799	0.93799	0.93799	0.93799	0.93799	0.93799	0.93799	0.93799	0.93799	0.93799	0.93799	0.93799	0.93799	0.93799	0.93799	0.93799	0.93799	0.93799	0.93799	0.93799	0.93799	0.93799	0.93799	0.93799	0.93799	0.93799
Baoshan Iron & Steel Co Ltd	SCN00209			Baoshan Iron and Steel Co., Ltd. (Baoshan Base)	China	Baoshan Iron and Steel Co., Ltd. [100%]	1	15670	15670	19997.6		unknown	>0	integrated (BF)	BF, BOF, EAF	operating					0.918231	0.918231	0.977506	0.93799	0.93799	0.93799	0.93799	0.93799	0.93799	0.93799	0.93799	0.93799	0.93799	0.93799	0.93799	0.93799	0.93799	0.93799	0.93799	0.93799	0.93799	0.93799	0.93799	0.93799	0.93799	0.93799	0.93799	0.93799	0.93799
Baoshan Iron & Steel Co Ltd	SCN00209			Baoshan Iron and Steel Co., Ltd. (Baoshan Base)	China	Baoshan Iron and Steel Co., Ltd. [100%]	1	18600	18600	19997.6		unknown	2400	integrated (BF-EAF)	BF, EAF	operating					0.918231	0.918231	0.977506	0.93799	0.93799	0.93799	0.93799	0.93799	0.93799	0.93799	0.93799	0.93799	0.93799	0.93799	0.93799	0.93799	0.93799	0.93799	0.93799	0.93799	0.93799	0.93799	0.93799	0.93799	0.93799	0.93799	0.93799	0.93799	0.93799
Baoshan Iron & Steel Co Ltd	SCN00209			Dummy - Baoshan Iron and Steel Co., Ltd. (Baoshan Base)	China	Baoshan Iron and Steel Co., Ltd. [100%]	1							electric	EAF	announced					0.918231	0.918231	0.977506	0.93799	0.93799	0.93799	0.93799	0.93799	0.93799	0.93799	0.93799	0.93799	0.93799	0.93799	0.93799	0.93799	0.93799	0.93799	0.93799	0.93799	0.93799	0.93799	0.93799	0.93799	0.93799	0.93799	0.93799	0.93799	0.93799
Baoshan Iron & Steel Co Ltd	SCN00210			Baosteel Special Steel Co., Ltd.	China	China Baowu Iron and Steel Group Co., Ltd. [100%]	1	500	500				500	electric	EAF	operating					0.918231	0.918231	0.977506	0.93799	0.93799	0.93799	0.93799	0.93799	0.93799	0.93799	0.93799	0.93799	0.93799	0.93799	0.93799	0.93799	0.93799	0.93799	0.93799	0.93799	0.93799	0.93799	0.93799	0.93799	0.93799	0.93799	0.93799	0.93799	0.93799
Total crude steel output
Production output trajectory (mt crude steel produced)
Baoshan Iron & Steel Co Ltd	SCN00021			Baosteel Zhanjiang Iron & Steel Co., Ltd. (Dongshan Base)	China	Baoshan Iron and Steel Co., Ltd. [90%]; Guangdong Hengjian Investment Holdings Co Ltd [10%]	0.9	12528	11275.2	12250		N/A	N/A	integrated (BF)	BF, BOF	operating					10353.2	10353.2	11021.6	10576	9056.48	9056.48	9056.48	9056.48	9056.48	9056.48	9056.48	9056.48	9056.48	9056.48	9056.48	9056.48	9056.48	9056.48	9056.48	9056.48	9056.48	9056.48	9056.48	9056.48	9056.48	9056.48	9056.48	9056.48	9056.48
Baoshan Iron & Steel Co Ltd	SCN00021			Dummy - Baosteel Zhanjiang Iron & Steel Co., Ltd. (Dongshan Base)	China	Baoshan Iron and Steel Co., Ltd. [90%]; Guangdong Hengjian Investment Holdings Co Ltd [10%]	0.9					1000		integrated (DRI)	DRI, EAF	operating					0	0	0	0	1519.54	1519.54	1519.54	1519.54	1519.54	1519.54	1519.54	1519.54	1519.54	1519.54	1519.54	1519.54	1519.54	1519.54	1519.54	1519.54	1519.54	1519.54	1519.54	1519.54	1519.54	1519.54	1519.54	1519.54	1519.54
Baoshan Iron & Steel Co Ltd	SCN00111			Wuhan Iron and Steel Co., Ltd. (Qingshan Base)	China	Baoshan Iron and Steel Co., Ltd. [100%]	1	15910	15910	14200		unknown	N/A	integrated (BF)	BF, BOF	operating					14609.1	14609.1	15552.1	14923.4	14923.4	14923.4	14923.4	14923.4	14923.4	14923.4	14923.4	14923.4	14923.4	14923.4	14923.4	14923.4	14923.4	14923.4	14923.4	14923.4	14923.4	14923.4	14923.4	14923.4	14923.4	14923.4	14923.4	14923.4	14923.4
Baoshan Iron & Steel Co Ltd	SCN00161			Shanghai Meishan Iron and Steel Co., Ltd. (Meishan Base)	China	China Baowu Iron and Steel Group Co., Ltd. [50.9%]; Other [49.1%]	0.77	7600	5852	7600		N/A	N/A	integrated (BF)	BF, BOF	operating					5373.49	5373.49	5720.37	5489.11	5489.11	5489.11	5489.11	5489.11	5489.11	5489.11	5489.11	5489.11	5489.11	5489.11	5489.11	5489.11	5489.11	5489.11	5489.11	5489.11	5489.11	5489.11	5489.11	5489.11	5489.11	5489.11	5489.11	5489.11	5489.11
Baoshan Iron & Steel Co Ltd	SCN00209			Baoshan Iron and Steel Co., Ltd. (Baoshan Base)	China	Baoshan Iron and Steel Co., Ltd. [100%]	1	15670	15670	19997.6		unknown	>0	integrated (BF)	BF, BOF, EAF	operating					14875.3	14875.3	15835.6	15195.4	15195.4	15195.4	15195.4	15195.4	15195.4	15195.4	15195.4	15195.4	15195.4	15195.4	15195.4	15195.4	15195.4	15195.4	15195.4	15195.4	15195.4	15195.4	15195.4	15195.4	15195.4	15195.4	15195.4	15195.4	15195.4
Baoshan Iron & Steel Co Ltd	SCN00209			Baoshan Iron and Steel Co., Ltd. (Baoshan Base)	China	Baoshan Iron and Steel Co., Ltd. [100%]	1	18600	18600	19997.6		unknown	2400	integrated (BF-EAF)	BF, EAF	operating					2203.75	2203.75	2346.02	2251.17	2251.17	2251.17	2251.17	2251.17	2251.17	2251.17	2251.17	2251.17	2251.17	2251.17	2251.17	2251.17	2251.17	2251.17	2251.17	2251.17	2251.17	2251.17	2251.17	2251.17	2251.17	2251.17	2251.17	2251.17	2251.17
Baoshan Iron & Steel Co Ltd	SCN00209			Dummy - Baoshan Iron and Steel Co., Ltd. (Baoshan Base)	China	Baoshan Iron and Steel Co., Ltd. [100%]	1							electric	EAF	announced					0	0	0	0	0	0	0	0	0	0	0	0	0	0	0	0	0	0	0	0	0	0	0	0	0	0	0	0	0
Baoshan Iron & Steel Co Ltd	SCN00210			Baosteel Special Steel Co., Ltd.	China	China Baowu Iron and Steel Group Co., Ltd. [100%]	1	500	500				500	electric	EAF	operating					459.116	459.116	488.753	468.995	468.995	468.995	468.995	468.995	468.995	468.995	468.995	468.995	468.995	468.995	468.995	468.995	468.995	468.995	468.995	468.995	468.995	468.995	468.995	468.995	468.995	468.995	468.995	468.995	468.995
Total crude steel output																					45211.1	47874	50964.4	48904.1	48904.1	48904.1	48904.1	48904.1	48904.1	48904.1	48904.1	48904.1	48904.1	48904.1	48904.1	48904.1	48904.1	48904.1	48904.1	48904.1	48904.1	48904.1	48904.1	48904.1	48904.1	48904.1	48904.1	48904.1	48904.1
Reported crude steel output																						47874	50964.4
CO2 emissions trajectory (mt CO2)
Baoshan Iron & Steel Co Ltd	SCN00021			Baosteel Zhanjiang Iron & Steel Co., Ltd. (Dongshan Base)	China	Baoshan Iron and Steel Co., Ltd. [90%]; Guangdong Hengjian Investment Holdings Co Ltd [10%]	0.9	12528	11275.2	12250		N/A	N/A	integrated (BF)	BF, BOF	operating					18.2217	18.2217	19.398	18.6138	15.9394	15.9394	15.9394	15.9394	15.9394	15.9394	15.9394	15.9394	15.9394	15.9394	15.9394	15.9394	15.9394	15.9394	15.9394	15.9394	15.9394	15.9394	15.9394	15.9394	15.9394	15.9394	15.9394	15.9394	15.9394
Baoshan Iron & Steel Co Ltd	SCN00021			Dummy - Baosteel Zhanjiang Iron & Steel Co., Ltd. (Dongshan Base)	China	Baoshan Iron and Steel Co., Ltd. [90%]; Guangdong Hengjian Investment Holdings Co Ltd [10%]	0.9					1000		integrated (DRI)	DRI, EAF	operating					0	0	0	0	1.59552	1.59552	1.59552	1.59552	1.59552	1.59552	1.59552	1.59552	1.59552	1.59552	1.59552	0.113966	0.113966	0.113966	0.113966	0.113966	0.113966	0.113966	0.113966	0.113966	0.113966	0.113966	0.113966	0.113966	0.113966
Baoshan Iron & Steel Co Ltd	SCN00111			Wuhan Iron and Steel Co., Ltd. (Qingshan Base)	China	Baoshan Iron and Steel Co., Ltd. [100%]	1	15910	15910	14200		unknown	N/A	integrated (BF)	BF, BOF	operating					25.7119	25.7119	27.3717	26.2652	26.2652	26.2652	26.2652	26.2652	26.2652	26.2652	26.2652	26.2652	26.2652	26.2652	26.2652	26.2652	26.2652	26.2652	26.2652	26.2652	26.2652	26.2652	26.2652	26.2652	26.2652	26.2652	26.2652	26.2652	26.2652
Baoshan Iron & Steel Co Ltd	SCN00161			Shanghai Meishan Iron and Steel Co., Ltd. (Meishan Base)	China	China Baowu Iron and Steel Group Co., Ltd. [50.9%]; Other [49.1%]	0.77	7600	5852	7600		N/A	N/A	integrated (BF)	BF, BOF	operating					9.45734	9.45734	10.0678	9.66084	9.66084	9.66084	9.66084	9.66084	9.66084	9.66084	9.66084	9.66084	9.66084	9.66084	9.66084	9.66084	9.66084	9.66084	9.66084	9.66084	9.66084	9.66084	9.66084	9.66084	9.66084	9.66084	9.66084	9.66084	9.66084
Baoshan Iron & Steel Co Ltd	SCN00209			Baoshan Iron and Steel Co., Ltd. (Baoshan Base)	China	Baoshan Iron and Steel Co., Ltd. [100%]	1	15670	15670	19997.6		unknown	>0	integrated (BF)	BF, BOF, EAF	operating					26.1806	26.1806	27.8707	26.744	26.744	26.744	26.744	26.744	26.744	26.744	26.744	26.744	26.744	26.744	26.744	26.744	26.744	26.744	26.744	26.744	26.744	26.744	26.744	26.744	26.744	26.744	26.744	26.744	26.744
Baoshan Iron & Steel Co Ltd	SCN00209			Baoshan Iron and Steel Co., Ltd. (Baoshan Base)	China	Baoshan Iron and Steel Co., Ltd. [100%]	1	18600	18600	19997.6		unknown	2400	integrated (BF-EAF)	BF, EAF	operating					3.87861	3.87861	4.12899	3.96207	3.96207	3.96207	3.96207	3.96207	3.96207	3.96207	3.96207	3.96207	3.96207	3.96207	3.96207	3.96207	3.96207	3.96207	3.96207	3.96207	3.96207	3.96207	3.96207	3.96207	3.96207	3.96207	3.96207	3.96207	3.96207
Baoshan Iron & Steel Co Ltd	SCN00209			Dummy - Baoshan Iron and Steel Co., Ltd. (Baoshan Base)	China	Baoshan Iron and Steel Co., Ltd. [100%]	1							electric	EAF	announced					0	0	0	0	0	0	0	0	0	0	0	0	0	0	0	0	0	0	0	0	0	0	0	0	0	0	0	0	0
Baoshan Iron & Steel Co Ltd	SCN00210			Baosteel Special Steel Co., Ltd.	China	China Baowu Iron and Steel Group Co., Ltd. [100%]	1	500	500				500	electric	EAF	operating					0.0137735	0.0137735	0.0146626	0.0140698	0.0140698	0.0140698	0.0140698	0.0140698	0.0140698	0.0140698	0.0140698	0.0140698	0.0140698	0.0140698	0.0140698	0.0140698	0.0140698	0.0140698	0.0140698	0.0140698	0.0140698	0.0140698	0.0140698	0.0140698	0.0140698	0.0140698	0.0140698	0.0140698	0.0140698
Total CO2 emissions																					83.464	83.464	88.8519	85.2599	84.1811	84.1811	84.1811	84.1811	84.1811	84.1811	84.1811	84.1811	84.1811	84.1811	84.1811	82.6995	82.6995	82.6995	82.6995	82.6995	82.6995	82.6995	82.6995	82.6995	82.6995	82.6995	82.6995	82.6995	82.6995
[truncated: 2 more columns]

## Sheet: Baoshan Iron & Steel_TP
Company name (CA100+)	GEM Plant ID	GEM Unit ID	Unit name	Plant name (English)	Country	Parent [formula]	Ownership share	Total nominal crude steel capacity (ttpa)	Owned nominal crude steel capacity (ttpa)	Nominal BF capacity (ttpa)	Nominal BOF capacity (ttpa)	Nominal DRI capacity (ttpa)	Nominal EAF steel capacity (ttpa)	Main production process	Main production equipment	Status	Plant/Unit - Start date	Last relining (year)	Announced phase-out (year)	Relining required (year)	2020	2021	2022	2023	2024	2025	2026	2027	2028	2029	2030	2031	2032	2033	2034	2035	2036	2037	2038	2039	2040	2041	2042	2043	2044	2045	2046	2047	2048
Baoshan Iron & Steel Co Ltd	SCN00021			Baosteel Zhanjiang Iron & Steel Co., Ltd. (Dongshan Base)	China	Baoshan Iron and Steel Co., Ltd. [90%]; Guangdong Hengjian Investment Holdings Co Ltd [10%]	0.9	12528	11275.2	12250		N/A	N/A	integrated (BF)	BF, BOF	operating					11275.2	11275.2	11275.2	11275.2	9655.2	9655.2	9655.2	9655.2	9655.2	9655.2	9655.2	9655.2	9655.2	9655.2	9655.2	9655.2	9655.2	9655.2	9655.2	9655.2	9655.2	9655.2	9655.2	9655.2	9655.2	9655.2	9655.2	9655.2	9655.2
Baoshan Iron & Steel Co Ltd	SCN00021			Dummy - Baosteel Zhanjiang Iron & Steel Co., Ltd. (Dongshan Base)	China	Baoshan Iron and Steel Co., Ltd. [90%]; Guangdong Hengjian Investment Holdings Co Ltd [10%]	0.9					1000		integrated (DRI)	DRI, EAF	operating	2023-12-01				0	0	0	0	1620	1620	1620	1620	1620	1620	1620	1620	1620	1620	1620	1620	1620	1620	1620	1620	1620	1620	1620	1620	1620	1620	1620	1620	1620
Baoshan Iron & Steel Co Ltd	SCN00021	U000116	1		China	Baoshan Iron and Steel Co., Ltd. [90%]; Guangdong Hengjian Investment Holdings Co Ltd [10%]	0.9	4115	3703.5	4115					BF	operating	2015-09-25	2015	N/A	2035	3703.5	3703.5	3703.5	3703.5	3703.5	3703.5	3703.5	3703.5	3703.5	3703.5	3703.5	3703.5	3703.5	3703.5	3703.5	3703.5	3703.5	3703.5	3703.5	3703.5	3703.5	3703.5	3703.5	3703.5	3703.5	3703.5	3703.5	3703.5	3703.5
Baoshan Iron & Steel Co Ltd	SCN00021	U000117	2		China	Baoshan Iron and Steel Co., Ltd. [90%]; Guangdong Hengjian Investment Holdings Co Ltd [10%]	0.9	4115	3703.5	4115					BF	operating	2016-07-15	2016	N/A	2036	3703.5	3703.5	3703.5	3703.5	3703.5	3703.5	3703.5	3703.5	3703.5	3703.5	3703.5	3703.5	3703.5	3703.5	3703.5	3703.5	3703.5	3703.5	3703.5	3703.5	3703.5	3703.5	3703.5	3703.5	3703.5	3703.5	3703.5	3703.5	3703.5
Baoshan Iron & Steel Co Ltd	SCN00021	U000118	3		China	Baoshan Iron and Steel Co., Ltd. [90%]; Guangdong Hengjian Investment Holdings Co Ltd [10%]	0.9	4020	3618	4020					BF	operating	January 2022	2022	N/A	2042	0	0	3618	3618	3618	3618	3618	3618	3618	3618	3618	3618	3618	3618	3618	3618	3618	3618	3618	3618	3618	3618	3618	3618	3618	3618	3618	3618	3618
Baoshan Iron & Steel Co Ltd	SCN00021-1			Baosteel Zhanjiang Iron & Steel Co., Ltd. DRI expansion	China	Baoshan Iron and Steel Co., Ltd. [90%]; Guangdong Hengjian Investment Holdings Co Ltd [10%]	0.9	1800	1620	N/A		1000	N/A	ironmaking (H2-DRI)	DRI	operating	2023-12-01				0	0	0	0	1620	1620	1620	1620	1620	1620	1620	1620	1620	1620	1620	1620	1620	1620	1620	1620	1620	1620	1620	1620	1620	1620	1620	1620	1620
Baoshan Iron & Steel Co Ltd	SCN00111			Wuhan Iron and Steel Co., Ltd. (Qingshan Base)	China	Baoshan Iron and Steel Co., Ltd. [100%]	1	15910	15910	14200		unknown	N/A	integrated (BF)	BF, BOF	operating					15910	15910	15910	15910	15910	15910	15910	15910	15910	15910	15910	15910	15910	15910	15910	15910	15910	15910	15910	15910	15910	15910	15910	15910	15910	15910	15910	15910	15910
Baoshan Iron & Steel Co Ltd	SCN00111	U000416	4		China	Baoshan Iron and Steel Co., Ltd. [100%]	1	0	0	2365					BF	operating	April 1970	2007	N/A	2027	2365	2365	2365	2365	2365	2365	2365	2365	2365	2365	2365	2365	2365	2365	2365	2365	2365	2365	2365	2365	2365	2365	2365	2365	2365	2365	2365	2365	2365
Baoshan Iron & Steel Co Ltd	SCN00111	U000417	5		China	Baoshan Iron and Steel Co., Ltd. [100%]	1	0	0	2920					BF	operating	1991-10-01	2007	N/A	2027	2920	2920	2920	2920	0	0	0	0	0	0	0	0	0	0	0	0	0	0	0	0	0	0	0	0	0	0	0	0	0
Baoshan Iron & Steel Co Ltd	SCN00111	U000418	6		China	Baoshan Iron and Steel Co., Ltd. [100%]	1	0	0	2686.4					BF	operating	2004-07-16	2004	N/A	2024	2686.4	2686.4	2686.4	2686.4	0	0	0	0	0	0	0	0	0	0	0	0	0	0	0	0	0	0	0	0	0	0	0	0	0
Baoshan Iron & Steel Co Ltd	SCN00111	U000419	7		China	Baoshan Iron and Steel Co., Ltd. [100%]	1	0	0	2840					BF	operating	2006-06-28	2006	N/A	2026	2840	2840	2840	2840	2840	2840	2840	2840	2840	2840	2840	2840	2840	2840	2840	2840	2840	2840	2840	2840	2840	2840	2840	2840	2840	2840	2840	2840	2840
Baoshan Iron & Steel Co Ltd	SCN00111	U000420	8		China	Baoshan Iron and Steel Co., Ltd. [100%]	1	0	0	3561.9					BF	operating	2009-08-02	2009	N/A	2029	3561.9	3561.9	3561.9	3561.9	3561.9	3561.9	3561.9	3561.9	3561.9	3561.9	3561.9	3561.9	3561.9	3561.9	3561.9	3561.9	3561.9	3561.9	3561.9	3561.9	3561.9	3561.9	3561.9	3561.9	3561.9	3561.9	3561.9	3561.9	3561.9
Baoshan Iron & Steel Co Ltd	SCN00111-1			Wuhan Iron and Steel Co., Ltd. BF expansion	China	Baoshan Iron and Steel Co., Ltd. [100%]	1	N/A	N/A	5340		unknown	N/A	ironmaking (BF)	BF	announced					0	0	0	0	0	0	0	0	0	0	0
Baoshan Iron & Steel Co Ltd	SCN00111-1	U000421	unknown	Wuhan Iron and Steel Co., Ltd. BF expansion	China	Baoshan Iron and Steel Co., Ltd. [100%]	1	0	0	2670					BF	announced	2023	NA	N/A	2023	0	0	0	0	2670	2670	2670	2670	2670	2670	2670	2670	2670	2670	2670	2670	2670	2670	2670	2670	2670	2670	2670	2670	2670	2670	2670	2670	2670
Baoshan Iron & Steel Co Ltd	SCN00111-1	U000422	unknown	Wuhan Iron and Steel Co., Ltd. BF expansion	China	Baoshan Iron and Steel Co., Ltd. [100%]	1	0	0	2670					BF	announced	2023	NA	N/A	2023	0	0	0	0	2670	2670	2670	2670	2670	2670	2670	2670	2670	2670	2670	2670	2670	2670	2670	2670	2670	2670	2670	2670	2670	2670	2670	2670	2670
Baoshan Iron & Steel Co Ltd	SCN00161			Shanghai Meishan Iron and Steel Co., Ltd. (Meishan Base)	China	China Baowu Iron and Steel Group Co., Ltd. [50.9%]; Other [49.1%]	0.77	7600	5852	7600		N/A	N/A	integrated (BF)	BF, BOF	operating	1969				5852	5852	5852	5852	5852	5852	5852	5852	5852	5852	5852	5852	5852	5852	5852	5852	5852	5852	5852	5852	5852	5852	5852	5852	5852	5852	5852	5852	5852
Baoshan Iron & Steel Co Ltd	SCN00162	U000544	unknown		China	China Baowu Iron and Steel Group Co., Ltd. [50.9%]; Other [49.1%]	0.77	1092.87	841.506	1092.87					BF	operating	unknown	NA	N/A	2023	841.506	841.506	841.506	841.506	841.506	841.506	841.506	841.506	841.506	841.506	841.506	841.506	841.506	841.506	841.506	841.506	841.506	841.506	841.506	841.506	841.506	841.506	841.506	841.506	841.506	841.506	841.506	841.506	841.506
Baoshan Iron & Steel Co Ltd	SCN00163	U000545	unknown		China	China Baowu Iron and Steel Group Co., Ltd. [50.9%]; Other [49.1%]	0.77	2732.16	2103.77	2732.16					BF	operating	unknown	NA	N/A	2023	2103.77	2103.77	2103.77	2103.77	2103.77	2103.77	2103.77	2103.77	2103.77	2103.77	2103.77	2103.77	2103.77	2103.77	2103.77	2103.77	2103.77	2103.77	2103.77	2103.77	2103.77	2103.77	2103.77	2103.77	2103.77	2103.77	2103.77	2103.77	2103.77
Baoshan Iron & Steel Co Ltd	SCN00164	U000546	unknown		China	China Baowu Iron and Steel Group Co., Ltd. [50.9%]; Other [49.1%]	0.77	3474.97	2675.73	3474.97					BF	operating	unknown	NA	N/A	2023	2675.73	2675.73	2675.73	2675.73	2675.73	2675.73	2675.73	2675.73	2675.73	2675.73	2675.73	2675.73	2675.73	2675.73	2675.73	2675.73	2675.73	2675.73	2675.73	2675.73	2675.73	2675.73	2675.73	2675.73	2675.73	2675.73	2675.73	2675.73	2675.73
Baoshan Iron & Steel Co Ltd	SCN00209			Baoshan Iron and Steel Co., Ltd. (Baoshan Base)	China	Baoshan Iron and Steel Co., Ltd. [100%]	1	18600	18600	19997.6		unknown	2400	integrated (BF)	BF, BOF	operating					16200	16200	16200	16200	15200	15200	15200	15200	15200	15200	13900	13900	13900	13900	13900	13900	13900	13900	13900	13900	13900	13900	13900	13900	13900	13900	13900	13900	13900
Baoshan Iron & Steel Co Ltd	SCN00209			Baoshan Iron and Steel Co., Ltd. (Baoshan Base)	China	Baoshan Iron and Steel Co., Ltd. [100%]	1	18600	18600	19997.6		unknown	2400	integrated (BF-EAF)	BF, EAF	operating					2400	2400	2400	2400	2400	2400	2400	2400	2400	2400	2400	2400	2400	2400	2400	2400	2400	2400	2400	2400	2400	2400	2400	2400	2400	2400	2400	2400	2400
Baoshan Iron & Steel Co Ltd	SCN00209			Dummy - Baoshan Iron and Steel Co., Ltd. (Baoshan Base)	China	Baoshan Iron and Steel Co., Ltd. [100%]	1							electric	EAF	announced					0	0	0	0	1000	1000	1000	1000	1000	1000	2300	2300	2300	2300	2300	2300	2300	2300	2300	2300	2300	2300	2300	2300	2300	2300	2300	2300	2300
Baoshan Iron & Steel Co Ltd	SCN00209	U000692	3		China	Baoshan Iron and Steel Co., Ltd. [100%]	1	0	0	3980					BF	operating	1994	2013	N/A	2033	3980	3980	3980	3980	3980	3980	3980	3980	3980	3980	3980	3980	3980	3980	3980	3980	3980	3980	3980	3980	3980	3980	3980	3980	3980	3980	3980	3980	3980
Baoshan Iron & Steel Co Ltd	SCN00209	U000693	2		China	Baoshan Iron and Steel Co., Ltd. [100%]	1	0	0	3770					BF	operating	1991	2021	N/A	2041	3770	3770	3770	3770	3770	3770	3770	3770	3770	3770	3770	3770	3770	3770	3770	3770	3770	3770	3770	3770	3770	3770	3770	3770	3770	3770	3770	3770	3770
Baoshan Iron & Steel Co Ltd	SCN00209	U000694	4#		China	Baoshan Iron and Steel Co., Ltd. [100%]	1	0	0	3500					BF	operating	2005	2005	N/A	2025	3500	3500	3500	3500	3500	3500	3500	3500	3500	3500	3500	3500	3500	3500	3500	3500	3500	3500	3500	3500	3500	3500	3500	3500	3500	3500	3500	3500	3500
Baoshan Iron & Steel Co Ltd	SCN00209	U000695	1#		China	Baoshan Iron and Steel Co., Ltd. [100%]	1	0	0	4050					BF	operating	1985	2009	N/A	2029	4050	4050	4050	4050	4050	4050	4050	4050	4050	4050	4050	4050	4050	4050	4050	4050	4050	4050	4050	4050	4050	4050	4050	4050	4050	4050	4050	4050	4050
Baoshan Iron & Steel Co Ltd	SCN00210			Baosteel Special Steel Co., Ltd.	China	China Baowu Iron and Steel Group Co., Ltd. [100%]	1	500	500				500	electric	EAF	operating	1958				500	500	500	500	500	500	500	500	500	500	500	500	500	500	500	500	500	500	500	500	500	500	500	500	500	500	500	500	500
Capacity projection by main production process
Integrated (BF)																					49237.2	49237.2	49237.2	49237.2	46617.2	46617.2	46617.2	46617.2	46617.2	46617.2	45317.2	45317.2	45317.2	45317.2	45317.2	45317.2	45317.2	45317.2	45317.2	45317.2	45317.2	45317.2	45317.2	45317.2	45317.2	45317.2	45317.2	45317.2	45317.2
Integrated (BF-EAF)																					2400	2400	2400	2400	2400	2400	2400	2400	2400	2400	2400	2400	2400	2400	2400	2400	2400	2400	2400	2400	2400	2400	2400	2400	2400	2400	2400	2400	2400
Electric																					500	500	500	500	1500	1500	1500	1500	1500	1500	2800	2800	2800	2800	2800	2800	2800	2800	2800	2800	2800	2800	2800	2800	2800	2800	2800	2800	2800
Direct reduction (DRI-EAF)																					0	0	0	0	1620	1620	1620	1620	1620	1620	1620	1620	1620	1620	1620	1620	1620	1620	1620	1620	1620	1620	1620	1620	1620	1620	1620	1620	1620
Total nominal crude steel production capacity																					52137.2	52137.2	52137.2	52137.2	52137.2	52137.2	52137.2	52137.2	52137.2	52137.2	52137.2	52137.2	52137.2	52137.2	52137.2	52137.2	52137.2	52137.2	52137.2	52137.2	52137.2	52137.2	52137.2	52137.2	52137.2	52137.2	52137.2	52137.2	52137.2
Reported crude steel capacity																						52648	55000
Capacity utilization
Baoshan Iron & Steel Co Ltd	SCN00021			Baosteel Zhanjiang Iron & Steel Co., Ltd. (Dongshan Base)	China	Baoshan Iron and Steel Co., Ltd. [90%]; Guangdong Hengjian Investment Holdings Co Ltd [10%]	0.9	12528	11275.2	12250		N/A	N/A	integrated (BF)	BF, BOF	operating					0.918231	0.918231	0.977506	0.93799	0.93799	0.93799	0.93799	0.93799	0.93799	0.93799	0.93799	0.93799	0.93799	0.93799	0.93799	0.93799	0.93799	0.93799	0.93799	0.93799	0.93799	0.93799	0.93799	0.93799	0.93799	0.93799	0.93799	0.93799	0.93799
Baoshan Iron & Steel Co Ltd	SCN00021			Dummy - Baosteel Zhanjiang Iron & Steel Co., Ltd. (Dongshan Base)	China	Baoshan Iron and Steel Co., Ltd. [90%]; Guangdong Hengjian Investment Holdings Co Ltd [10%]	0.9					1000		integrated (DRI)	DRI, EAF	operating					0.918231	0.918231	0.977506	0.93799	0.93799	0.93799	0.93799	0.93799	0.93799	0.93799	0.93799	0.93799	0.93799	0.93799	0.93799	0.93799	0.93799	0.93799	0.93799	0.93799	0.93799	0.93799	0.93799	0.93799	0.93799	0.93799	0.93799	0.93799	0.93799
Baoshan Iron & Steel Co Ltd	SCN00111			Wuhan Iron and Steel Co., Ltd. (Qingshan Base)	China	Baoshan Iron and Steel Co., Ltd. [100%]	1	15910	15910	14200		unknown	N/A	integrated (BF)	BF, BOF	operating					0.918231	0.918231	0.977506	0.93799	0.93799	0.93799	0.93799	0.93799	0.93799	0.93799	0.93799	0.93799	0.93799	0.93799	0.93799	0.93799	0.93799	0.93799	0.93799	0.93799	0.93799	0.93799	0.93799	0.93799	0.93799	0.93799	0.93799	0.93799	0.93799
Baoshan Iron & Steel Co Ltd	SCN00161			Shanghai Meishan Iron and Steel Co., Ltd. (Meishan Base)	China	China Baowu Iron and Steel Group Co., Ltd. [50.9%]; Other [49.1%]	0.77	7600	5852	7600		N/A	N/A	integrated (BF)	BF, BOF	operating					0.918231	0.918231	0.977506	0.93799	0.93799	0.93799	0.93799	0.93799	0.93799	0.93799	0.93799	0.93799	0.93799	0.93799	0.93799	0.93799	0.93799	0.93799	0.93799	0.93799	0.93799	0.93799	0.93799	0.93799	0.93799	0.93799	0.93799	0.93799	0.93799
Baoshan Iron & Steel Co Ltd	SCN00209			Baoshan Iron and Steel Co., Ltd. (Baoshan Base)	China	Baoshan Iron and Steel Co., Ltd. [100%]	1	15670	15670	19997.6		unknown	>0	integrated (BF)	BF, BOF, EAF	operating					0.918231	0.918231	0.977506	0.93799	0.93799	0.93799	0.93799	0.93799	0.93799	0.93799	0.93799	0.93799	0.93799	0.93799	0.93799	0.93799	0.93799	0.93799	0.93799	0.93799	0.93799	0.93799	0.93799	0.93799	0.93799	0.93799	0.93799	0.93799	0.93799
Baoshan Iron & Steel Co Ltd	SCN00209			Baoshan Iron and Steel Co., Ltd. (Baoshan Base)	China	Baoshan Iron and Steel Co., Ltd. [100%]	1	18600	18600	19997.6		unknown	2400	integrated (BF-EAF)	BF, EAF	operating					0.918231	0.918231	0.977506	0.93799	0.93799	0.93799	0.93799	0.93799	0.93799	0.93799	0.93799	0.93799	0.93799	0.93799	0.93799	0.93799	0.93799	0.93799	0.93799	0.93799	0.93799	0.93799	0.93799	0.93799	0.93799	0.93799	0.93799	0.93799	0.93799
Baoshan Iron & Steel Co Ltd	SCN00209			Dummy - Baoshan Iron and Steel Co., Ltd. (Baoshan Base)	China	Baoshan Iron and Steel Co., Ltd. [100%]	1							electric	EAF	announced					0.918231	0.918231	0.977506	0.93799	0.93799	0.93799	0.93799	0.93799	0.93799	0.93799	0.93799	0.93799	0.93799	0.93799	0.93799	0.93799	0.93799	0.93799	0.93799	0.93799	0.93799	0.93799	0.93799	0.93799	0.93799	0.93799	0.93799	0.93799	0.93799
Baoshan Iron & Steel Co Ltd	SCN00210			Baosteel Special Steel Co., Ltd.	China	China Baowu Iron and Steel Group Co., Ltd. [100%]	1	500	500				500	electric	EAF	operating					0.918231	0.918231	0.977506	0.93799	0.93799	0.93799	0.93799	0.93799	0.93799	0.93799	0.93799	0.93799	0.93799	0.93799	0.93799	0.93799	0.93799	0.93799	0.93799	0.93799	0.93799	0.93799	0.93799	0.93799	0.93799	0.93799	0.93799	0.93799	0.93799
Total crude steel output
Production output trajectory (mt crude steel produced)
Baoshan Iron & Steel Co Ltd	SCN00021			Baosteel Zhanjiang Iron & Steel Co., Ltd. (Dongshan Base)	China	Baoshan Iron and Steel Co., Ltd. [90%]; Guangdong Hengjian Investment Holdings Co Ltd [10%]	0.9	12528	11275.2	12250		N/A	N/A	integrated (BF)	BF, BOF	operating					10353.2	10353.2	11021.6	10576	9056.48	9056.48	9056.48	9056.48	9056.48	9056.48	9056.48	9056.48	9056.48	9056.48	9056.48	9056.48	9056.48	9056.48	9056.48	9056.48	9056.48	9056.48	9056.48	9056.48	9056.48	9056.48	9056.48	9056.48	9056.48
Baoshan Iron & Steel Co Ltd	SCN00021			Dummy - Baosteel Zhanjiang Iron & Steel Co., Ltd. (Dongshan Base)	China	Baoshan Iron and Steel Co., Ltd. [90%]; Guangdong Hengjian Investment Holdings Co Ltd [10%]	0.9					1000		integrated (DRI)	DRI, EAF	operating					0	0	0	0	1519.54	1519.54	1519.54	1519.54	1519.54	1519.54	1519.54	1519.54	1519.54	1519.54	1519.54	1519.54	1519.54	1519.54	1519.54	1519.54	1519.54	1519.54	1519.54	1519.54	1519.54	1519.54	1519.54	1519.54	1519.54
Baoshan Iron & Steel Co Ltd	SCN00111			Wuhan Iron and Steel Co., Ltd. (Qingshan Base)	China	Baoshan Iron and Steel Co., Ltd. [100%]	1	15910	15910	14200		unknown	N/A	integrated (BF)	BF, BOF	operating					14609.1	14609.1	15552.1	14923.4	14923.4	14923.4	14923.4	14923.4	14923.4	14923.4	14923.4	14923.4	14923.4	14923.4	14923.4	14923.4	14923.4	14923.4	14923.4	14923.4	14923.4	14923.4	14923.4	14923.4	14923.4	14923.4	14923.4	14923.4	14923.4
Baoshan Iron & Steel Co Ltd	SCN00161			Shanghai Meishan Iron and Steel Co., Ltd. (Meishan Base)	China	China Baowu Iron and Steel Group Co., Ltd. [50.9%]; Other [49.1%]	0.77	7600	5852	7600		N/A	N/A	integrated (BF)	BF, BOF	operating					5373.49	5373.49	5720.37	5489.11	5489.11	5489.11	5489.11	5489.11	5489.11	5489.11	5489.11	5489.11	5489.11	5489.11	5489.11	5489.11	5489.11	5489.11	5489.11	5489.11	5489.11	5489.11	5489.11	5489.11	5489.11	5489.11	5489.11	5489.11	5489.11
Baoshan Iron & Steel Co Ltd	SCN00209			Baoshan Iron and Steel Co., Ltd. (Baoshan Base)	China	Baoshan Iron and Steel Co., Ltd. [100%]	1	15670	15670	19997.6		unknown	>0	integrated (BF)	BF, BOF, EAF	operating					14875.3	14875.3	15835.6	15195.4	14257.4	14257.4	14257.4	14257.4	14257.4	14257.4	13038.1	13038.1	13038.1	13038.1	13038.1	13038.1	13038.1	13038.1	13038.1	13038.1	13038.1	13038.1	13038.1	13038.1	13038.1	13038.1	13038.1	13038.1	13038.1
Baoshan Iron & Steel Co Ltd	SCN00209			Baoshan Iron and Steel Co., Ltd. (Baoshan Base)	China	Baoshan Iron and Steel Co., Ltd. [100%]	1	18600	18600	19997.6		unknown	2400	integrated (BF-EAF)	BF, EAF	operating					2203.75	2203.75	2346.02	2251.17	2251.17	2251.17	2251.17	2251.17	2251.17	2251.17	2251.17	2251.17	2251.17	2251.17	2251.17	2251.17	2251.17	2251.17	2251.17	2251.17	2251.17	2251.17	2251.17	2251.17	2251.17	2251.17	2251.17	2251.17	2251.17
Baoshan Iron & Steel Co Ltd	SCN00209			Dummy - Baoshan Iron and Steel Co., Ltd. (Baoshan Base)	China	Baoshan Iron and Steel Co., Ltd. [100%]	1							electric	EAF	announced					0	0	0	0	937.99	937.99	937.99	937.99	937.99	937.99	2157.38	2157.38	2157.38	2157.38	2157.38	2157.38	2157.38	2157.38	2157.38	2157.38	2157.38	2157.38	2157.38	2157.38	2157.38	2157.38	2157.38	2157.38	2157.38
Baoshan Iron & Steel Co Ltd	SCN00210			Baosteel Special Steel Co., Ltd.	China	China Baowu Iron and Steel Group Co., Ltd. [100%]	1	500	500				500	electric	EAF	operating					459.116	459.116	488.753	468.995	468.995	468.995	468.995	468.995	468.995	468.995	468.995	468.995	468.995	468.995	468.995	468.995	468.995	468.995	468.995	468.995	468.995	468.995	468.995	468.995	468.995	468.995	468.995	468.995	468.995
Total crude steel output																					45211.1	47874	50964.4	48904.1	48904.1	48904.1	48904.1	48904.1	48904.1	48904.1	48904.1	48904.1	48904.1	48904.1	48904.1	48904.1	48904.1	48904.1	48904.1	48904.1	48904.1	48904.1	48904.1	48904.1	48904.1	48904.1	48904.1	48904.1	48904.1
Reported crude steel output																						47874	50964.4
CO2 emissions trajectory (mt CO2)
Baoshan Iron & Steel Co Ltd	SCN00021			Baosteel Zhanjiang Iron & Steel Co., Ltd. (Dongshan Base)	China	Baoshan Iron and Steel Co., Ltd. [90%]; Guangdong Hengjian Investment Holdings Co Ltd [10%]	0.9	12528	11275.2	12250		N/A	N/A	integrated (BF)	BF, BOF	operating					18.2217	18.2217	19.398	18.6138	15.9394	15.9394	15.9394	15.9394	15.9394	15.9394	15.9394	15.9394	15.9394	15.9394	15.9394	15.9394	15.9394	15.9394	15.9394	15.9394	15.9394	15.9394	15.9394	15.9394	15.9394	15.9394	15.9394	15.9394	15.9394
Baoshan Iron & Steel Co Ltd	SCN00021			Dummy - Baosteel Zhanjiang Iron & Steel Co., Ltd. (Dongshan Base)	China	Baoshan Iron and Steel Co., Ltd. [90%]; Guangdong Hengjian Investment Holdings Co Ltd [10%]	0.9					1000		integrated (DRI)	DRI, EAF	operating					0	0	0	0	1.59552	1.59552	1.59552	1.59552	1.59552	1.59552	1.59552	1.59552	1.59552	1.59552	1.59552	0.113966	0.113966	0.113966	0.113966	0.113966	0.113966	0.113966	0.113966	0.113966	0.113966	0.113966	0.113966	0.113966	0.113966
Baoshan Iron & Steel Co Ltd	SCN00111			Wuhan Iron and Steel Co., Ltd. (Qingshan Base)	China	Baoshan Iron and Steel Co., Ltd. [100%]	1	15910	15910	14200		unknown	N/A	integrated (BF)	BF, BOF	operating					25.7119	25.7119	27.3717	26.2652	26.2652	26.2652	26.2652	26.2652	26.2652	26.2652	26.2652	26.2652	26.2652	26.2652	26.2652	26.2652	26.2652	26.2652	26.2652	26.2652	26.2652	26.2652	26.2652	26.2652	26.2652	26.2652	26.2652	26.2652	26.2652
Baoshan Iron & Steel Co Ltd	SCN00161			Shanghai Meishan Iron and Steel Co., Ltd. (Meishan Base)	China	China Baowu Iron and Steel Group Co., Ltd. [50.9%]; Other [49.1%]	0.77	7600	5852	7600		N/A	N/A	integrated (BF)	BF, BOF	operating					9.45734	9.45734	10.0678	9.66084	9.66084	9.66084	9.66084	9.66084	9.66084	9.66084	9.66084	9.66084	9.66084	9.66084	9.66084	9.66084	9.66084	9.66084	9.66084	9.66084	9.66084	9.66084	9.66084	9.66084	9.66084	9.66084	9.66084	9.66084	9.66084
Baoshan Iron & Steel Co Ltd	SCN00209			Baoshan Iron and Steel Co., Ltd. (Baoshan Base)	China	Baoshan Iron and Steel Co., Ltd. [100%]	1	15670	15670	19997.6		unknown	>0	integrated (BF)	BF, BOF, EAF	operating					26.1806	26.1806	27.8707	26.744	25.0931	25.0931	25.0931	25.0931	25.0931	25.0931	22.947	22.947	22.947	22.947	22.947	22.947	22.947	22.947	22.947	22.947	22.947	22.947	22.947	22.947	22.947	22.947	22.947	22.947	22.947
Baoshan Iron & Steel Co Ltd	SCN00209			Baoshan Iron and Steel Co., Ltd. (Baoshan Base)	China	Baoshan Iron and Steel Co., Ltd. [100%]	1	18600	18600	19997.6		unknown	2400	integrated (BF-EAF)	BF, EAF	operating					3.87861	3.87861	4.12899	3.96207	3.96207	3.96207	3.96207	3.96207	3.96207	3.96207	3.96207	3.96207	3.96207	3.96207	3.96207	3.96207	3.96207	3.96207	3.96207	3.96207	3.96207	3.96207	3.96207	3.96207	3.96207	3.96207	3.96207	3.96207	3.96207
Baoshan Iron & Steel Co Ltd	SCN00209			Dummy - Baoshan Iron and Steel Co., Ltd. (Baoshan Base)	China	Baoshan Iron and Steel Co., Ltd. [100%]	1							electric	EAF	announced					0	0	0	0	0.0281397	0.0281397	0.0281397	0.0281397	0.0281397	0.0281397	0.0647213	0.0647213	0.0647213	0.0647213	0.0647213	0.0647213	0.0647213	0.0647213	0.0647213	0.0647213	0.0647213	0.0647213	0.0647213	0.0647213	0.0647213	0.0647213	0.0647213	0.0647213	0.0647213
Baoshan Iron & Steel Co Ltd	SCN00210			Baosteel Special Steel Co., Ltd.	China	China Baowu Iron and Steel Group Co., Ltd. [100%]	1	500	500				500	electric	EAF	operating					0.0137735	0.0137735	0.0146626	0.0140698	0.0140698	0.0140698	0.0140698	0.0140698	0.0140698	0.0140698	0.0140698	0.0140698	0.0140698	0.0140698	0.0140698	0.0140698	0.0140698	0.0140698	0.0140698	0.0140698	0.0140698	0.0140698	0.0140698	0.0140698	0.0140698	0.0140698	0.0140698	0.0140698	0.0140698
Total CO2 emissions																					83.464	83.464	88.8519	85.2599	82.5583	82.5583	82.5583	82.5583	82.5583	82.5583	80.4488	80.4488	80.4488	80.4488	80.4488	78.9672	78.9672	78.9672	78.9672	78.9672	78.9672	78.9672	78.9672	78.9672	78.9672	78.9672	78.9672	78.9672	78.9672
[truncated: 2 more columns]

## Sheet: BlueScope Steel_Output
	Emissions																																	BAU		Stated TP
		2020	2021	2022	2023	2024	2025	2026	2027	2028	2029	2030	2031	2032	2033	2034	2035	2036	2037	2038	2039	2040	2041	2042	2043	2044	2045	2046	2047	2048	2049	2050	Cumulative Emissions	Overshoot	% overshoot	Overshoot	% overshoot
	BlueScope Steel - Absolute CO2 emissions (BAU)	8.96688	9.46006	8.91006	8.5557	8.99339	8.99339	8.99339	8.99339	8.99339	8.99339	8.99339	8.99339	8.99339	8.99339	8.99339	8.99339	8.99339	8.99339	8.99339	8.99339	8.99339	8.99339	8.99339	8.99339	8.99339	8.99339	8.99339	8.99339	8.99339	8.99339	8.99339	278.714
	BlueScope Steel - Absolute CO2 emissions (TP)	8.96688	9.46006	8.91006	8.5557	8.99339	8.99339	8.99339	8.99339	8.99339	9.01225	9.01225	9.01225	9.01225	9.01225	9.01225	9.01225	9.01225	9.01225	9.01225	9.01225	9.01225	9.01225	9.01225	9.01225	9.01225	9.01225	9.01225	9.01225	9.01225	9.01225	9.01225	279.129
	BlueScope Steel - Absolute CO2 emissions (REMIND Net Zero 2050 benchmark)	8.96688	8.49533	8.02378	7.55223	7.08068	6.60913	5.81455	5.01996	4.22538	3.4308	2.63621	2.28127	1.92632	1.57138	1.21644	0.861491	0.742317	0.623144	0.50397	0.384797	0.265623	0.232336	0.199049	0.165762	0.132474	0.0991872	0.0901149	0.0810426	0.0719704	0.0628981	0.0538258	79.4204	199.294	2.50936	199.709	2.51458
	BlueScope Steel - Absolute CO2 emissions (REMIND Below 2°C benchmark)	8.96688	8.75015	8.53341	8.31667	8.09993	7.88319	7.39693	6.91066	6.4244	5.93813	5.45186	5.18504	4.91821	4.65139	4.38456	4.11774	3.69635	3.27496	2.85356	2.43217	2.01078	1.83792	1.66507	1.49221	1.31935	1.14649	1.07573	1.00496	0.934199	0.863435	0.79267	132.329	146.385	1.10622	146.8	1.10936
	BlueScope Steel - Absolute CO2 emissions (GCAM 6.0 NGFS Net Zero 2050 benchmark)	8.96688	8.76036	8.55383	8.3473	8.14077	7.93424	7.3013	6.66835	6.03541	5.40246	4.76952	4.26372	3.75792	3.25213	2.74633	2.24053	2.0097	1.77886	1.54802	1.31719	1.08635	0.981825	0.877301	0.772776	0.668252	0.563727	0.539279	0.514831	0.490383	0.465935	0.441487	111.197	167.517	1.50649	167.932	1.51022
	BlueScope Steel - Absolute CO2 emissions (GCAM 6.0 NGFS Below 2°C benchmark)	8.96688	8.79021	8.61353	8.43686	8.26019	8.08351	7.55704	7.03056	6.50408	5.97761	5.45113	4.99322	4.53531	4.0774	3.61949	3.16157	2.92952	2.69747	2.46541	2.23336	2.00131	1.84733	1.69336	1.53938	1.3854	1.23143	1.14017	1.04891	0.957656	0.866399	0.775141	128.871	149.844	1.16274	150.258	1.16596
	BlueScope Steel - Absolute CO2 emissions (MESSAGEix Net Zero 2050 benchmark)	8.96688	9.0521	9.13732	9.22253	9.30775	9.39296	9.26578	9.1386	9.01141	8.88423	8.75705	8.60241	8.44777	8.29313	8.1385	7.98386	7.80996	7.63606	7.46216	7.28827	7.11437	6.98961	6.86486	6.7401	6.61535	6.49059	6.35107	6.21154	6.07202	5.93249	5.79297	242.974	35.7407	0.147097	36.1555	0.148804
	BlueScope Steel - Absolute CO2 emissions (MESSAGEix Below 2°C benchmark)	8.96688	9.0521	9.13732	9.22253	9.30775	9.39296	9.30087	9.20878	9.11669	9.0246	8.9325	8.85515	8.7778	8.70044	8.62309	8.54573	8.39458	8.24343	8.09228	7.94114	7.78999	7.67976	7.56954	7.45931	7.34909	7.23887	7.11906	6.99925	6.87944	6.75963	6.63982	256.32	22.394	0.0873671	22.8088	0.0889855

## Sheet: BlueScope Steel_BAU 
Company name (CA100+)	GEM Plant ID	GEM Unit ID	Unit name	Plant name (English)	Country	Parent [formula]	Ownership share	Total nominal crude steel capacity (ttpa)	Owned nominal crude steel capacity (ttpa)	Nominal BF capacity (ttpa)	Nominal BOF capacity (ttpa)	Nominal DRI capacity (ttpa)	Nominal EAF steel capacity (ttpa)	Main production process	Main production equipment	Status	Plant/Unit - Start date	Last relining (year)	Announced phase-out (year)	Relining required (year)	2020	2021	2022	2023	2024	2025	2026	2027	2028	2029	2030	2031	2032	2033	2034	2035	2036	2037	2038	2039	2040	2041	2042	2043	2044	2045	2046	2047	2048
Bluescope Steel Ltd	SAU00001			BlueScope Port Kembla steel plant	Australia	BlueScope Steel Ltd [100%]	1	3200	3200	3000		N/A	N/A	integrated (BF)	BF, BOF	operating					3200	3200	3200	3200	3200	3200	3200	3200	3200	3200	3200	3200	3200	3200	3200	3200	3200	3200	3200	3200	3200	3200	3200	3200	3200	3200	3200	3200	3200
Bluescope Steel Ltd	SAU00001	U000008	5		Australia	BlueScope Steel Ltd [100%]	1	3000	3000	3000						operating	1972	2009	2026	2026	3000	3000	3000	3000	3000	3000	3000	0	0	0	0
Bluescope Steel Ltd	SAU00001	U000009	6		Australia	BlueScope Steel Ltd [100%]	1	3000	3000	3000						mothballed	1996	2023	2011	2043	0	0	0	0	0	0	0	3000	3000	3000	3000	3000	3000	3000	3000	3000	3000	3000	3000	3000	3000	3000	3000	3000	3000	3000	3000	3000	3000
Bluescope Steel Ltd	SUS00020			BlueScope North Star Steel plant	United States	BlueScope Steel Ltd [100%]	1	2183	2183	N/A		N/A	2183	electric	EAF	operating					2183	2183	2183	2183	2183	2183	2183	2183	2183	2183	2183	2183	2183	2183	2183	2183	2183	2183	2183	2183	2183	2183	2183	2183	2183	2183	2183	2183	2183
Bluescope Steel Ltd	SUS00020-1			BlueScope North Star Steel plant EAF expansion	United States	BlueScope Steel Ltd [100%]	1	850	850	N/A		N/A	850	electric	EAF	operating	2022-05-01				0	0	354.167	850	850	850	850	850	850	850	850	850	850	850	850	850	850	850	850	850	850	850	850	850	850	850	850	850	850
Bluescope Steel Ltd	SNZ00001			BlueScope New Zealand Steel Glenbrook	New Zealand	BlueScope Steel Ltd [100%]	1	650	650	N/A		650	N/A	integrated (DRI)	BOF, DRI	operating					650	650	650	650	650	650	0	0	0	0	0	0	0	0	0	0	0	0	0	0	0	0	0	0	0	0	0	0	0
Bluescope Steel Ltd	SNZ00002			Dummy - BlueScope New Zealand Steel Glenbrook	New Zealand	BlueScope Steel Ltd [100%]	1	325						integrated (DRI)	DRI, EAF	construction	2026				0	0	0	0	0	0	650	650	650	650	650	650	650	650	650	650	650	650	650	650	650	650	650	650	650	650	650	650	650
Bluescope Steel Ltd	SUS00079			BlueScope Steel EAF plant	United States	BlueScope Steel Ltd [100%]	1	500	500	N/A		N/A	500	electric	EAF	announced					0	0	0	0	0	0	0	0	0	0	0	0	0	0	0	0	0	0	0	0	0	0	0	0	0	0	0	0	0
Capacity projection by main production process
Integrated (BF)																					3200	3200	3200	3200	3200	3200	3200	3200	3200	3200	3200	3200	3200	3200	3200	3200	3200	3200	3200	3200	3200	3200	3200	3200	3200	3200	3200	3200	3200
Integrated (DRI-BF)																					650	650	650	650	650	650	0	0	0	0	0	0	0	0	0	0	0	0	0	0	0	0	0	0	0	0	0	0	0
Electric																					2183	2183	2537.17	3033	3033	3033	3033	3033	3033	3033	3033	3033	3033	3033	3033	3033	3033	3033	3033	3033	3033	3033	3033	3033	3033	3033	3033	3033	3033
Direct reduction (DRI-EAF)																					0	0	0	0	0	0	0	0	0	0	0	0	0	0	0	0	0	0	0	0	0	0	0	0	0	0	0	0	0
Total nominal crude steel production capacity																					6033	6033	6387.17	6883	6883	6883	6233	6233	6233	6233	6233	6233	6233	6233	6233	6233	6233	6233	6233	6233	6233	6233	6233	6233	6233	6233	6233	6233	6233
Reported crude steel capacity																						6004	5978
Capacity utilization
Bluescope Steel Ltd	SAU00001			BlueScope Port Kembla steel plant	Australia	BlueScope Steel Ltd [100%]	1	3200	3200	3000		N/A	N/A	integrated (BF)	BF, BOF	operating					0.943312	0.995193	0.935939	0.896847	0.942823	0.942823	0.942823	0.942823	0.942823	0.942823	0.942823	0.942823	0.942823	0.942823	0.942823	0.942823	0.942823	0.942823	0.942823	0.942823	0.942823	0.942823	0.942823	0.942823	0.942823	0.942823	0.942823	0.942823	0.942823
Bluescope Steel Ltd	SUS00020			BlueScope North Star Steel plant	United States	BlueScope Steel Ltd [100%]	1	2183	2183	N/A		N/A	2183	electric	EAF	operating					0.943312	0.995193	0.935939	0.896847	0.942823	0.942823	0.942823	0.942823	0.942823	0.942823	0.942823	0.942823	0.942823	0.942823	0.942823	0.942823	0.942823	0.942823	0.942823	0.942823	0.942823	0.942823	0.942823	0.942823	0.942823	0.942823	0.942823	0.942823	0.942823
Bluescope Steel Ltd	SUS00020-1			BlueScope North Star Steel plant EAF expansion	United States	BlueScope Steel Ltd [100%]	1	850	850	N/A		N/A	850	electric	EAF	operating	2022-05-01				0	0	0.935939	0.896847	0.916393	0.916393	0.916393	0.916393	0.916393	0.916393	0.916393	0.916393	0.916393	0.916393	0.916393	0.916393	0.916393	0.916393	0.916393	0.916393	0.916393	0.916393	0.916393	0.916393	0.916393	0.916393	0.916393	0.916393	0.916393
Bluescope Steel Ltd	SNZ00001			BlueScope New Zealand Steel Glenbrook	New Zealand	BlueScope Steel Ltd [100%]	1	650	650	N/A		650	N/A	integrated (DRI)	BOF, DRI	operating					0.943312	0.995193	0.935939	0.896847	0.942823	0.942823	0.942823	0.942823	0.942823	0.942823	0.942823	0.942823	0.942823	0.942823	0.942823	0.942823	0.942823	0.942823	0.942823	0.942823	0.942823	0.942823	0.942823	0.942823	0.942823	0.942823	0.942823	0.942823	0.942823
Bluescope Steel Ltd	SNZ00002			Dummy - BlueScope New Zealand Steel Glenbrook	New Zealand	BlueScope Steel Ltd [100%]	1	325						integrated (DRI)	DRI, EAF	construction	2026				0.943312	0.995193	0.935939	0.896847	0.942823	0.942823	0.942823	0.942823	0.942823	0.942823	0.942823	0.942823	0.942823	0.942823	0.942823	0.942823	0.942823	0.942823	0.942823	0.942823	0.942823	0.942823	0.942823	0.942823	0.942823	0.942823	0.942823	0.942823	0.942823
Bluescope Steel Ltd	SUS00079			BlueScope Steel EAF plant	United States	BlueScope Steel Ltd [100%]	1	500	500	N/A		N/A	500	electric	EAF	announced					0.943312	0.995193	0.935939	0.896847	0.942823	0.942823	0.942823	0.942823	0.942823	0.942823	0.942823	0.942823	0.942823	0.942823	0.942823	0.942823	0.942823	0.942823	0.942823	0.942823	0.942823	0.942823	0.942823	0.942823	0.942823	0.942823	0.942823	0.942823	0.942823
Total crude steel output
Production output trajectory (mt crude steel produced)
Bluescope Steel Ltd	SAU00001			BlueScope Port Kembla steel plant	Australia	BlueScope Steel Ltd [100%]	1	3200	3200	3000		N/A	N/A	integrated (BF)	BF, BOF	operating					3018.6	3184.62	2995.01	2869.91	3017.03	3017.03	3017.03	3017.03	3017.03	3017.03	3017.03	3017.03	3017.03	3017.03	3017.03	3017.03	3017.03	3017.03	3017.03	3017.03	3017.03	3017.03	3017.03	3017.03	3017.03	3017.03	3017.03	3017.03	3017.03
Bluescope Steel Ltd	SUS00020			BlueScope North Star Steel plant	United States	BlueScope Steel Ltd [100%]	1	2183	2183	N/A		N/A	2183	electric	EAF	operating					2059.25	2172.51	2043.16	1957.82	2058.18	2058.18	2058.18	2058.18	2058.18	2058.18	2058.18	2058.18	2058.18	2058.18	2058.18	2058.18	2058.18	2058.18	2058.18	2058.18	2058.18	2058.18	2058.18	2058.18	2058.18	2058.18	2058.18	2058.18	2058.18
Bluescope Steel Ltd	SUS00020-1			BlueScope North Star Steel plant EAF expansion	United States	BlueScope Steel Ltd [100%]	1	850	850	N/A		N/A	850	electric	EAF	operating	2022-05-01				0	0	331.478	762.32	778.934	778.934	778.934	778.934	778.934	778.934	778.934	778.934	778.934	778.934	778.934	778.934	778.934	778.934	778.934	778.934	778.934	778.934	778.934	778.934	778.934	778.934	778.934	778.934	778.934
Bluescope Steel Ltd	SNZ00001			BlueScope New Zealand Steel Glenbrook	New Zealand	BlueScope Steel Ltd [100%]	1	650	650	N/A		650	N/A	integrated (DRI)	BOF, DRI	operating					613.153	646.876	608.361	582.951	612.835	612.835	0	0	0	0	0	0	0	0	0	0	0	0	0	0	0	0	0	0	0	0	0	0	0
Bluescope Steel Ltd	SNZ00002			Dummy - BlueScope New Zealand Steel Glenbrook	New Zealand	BlueScope Steel Ltd [100%]	1	325						integrated (DRI)	DRI, EAF	construction	2026				0	0	0	0	0	0	612.835	612.835	612.835	612.835	612.835	612.835	612.835	612.835	612.835	612.835	612.835	612.835	612.835	612.835	612.835	612.835	612.835	612.835	612.835	612.835	612.835	612.835	612.835
Bluescope Steel Ltd	SUS00079			BlueScope Steel EAF plant	United States	BlueScope Steel Ltd [100%]	1	500	500	N/A		N/A	500	electric	EAF	announced					0	0	0	0	0	0	0	0	0	0	0	0	0	0	0	0	0	0	0	0	0	0	0	0	0	0	0	0	0
Total crude steel output																					5691	6004	5978	6173	6466.98	6466.98	6466.98	6466.98	6466.98	6466.98	6466.98	6466.98	6466.98	6466.98	6466.98	6466.98	6466.98	6466.98	6466.98	6466.98	6466.98	6466.98	6466.98	6466.98	6466.98	6466.98	6466.98	6466.98	6466.98
Reported crude steel output																					5691	6004	5978	6173
CO2 emissions trajectory (mt CO2)
Bluescope Steel Ltd	SAU00001			BlueScope Port Kembla steel plant	Australia	BlueScope Steel Ltd [100%]	1	3200	3200	3000		N/A	N/A	integrated (BF)	BF, BOF	operating					6.98374	7.36784	6.92916	6.63974	6.98012	6.98012	6.98012	6.98012	6.98012	6.98012	6.98012	6.98012	6.98012	6.98012	6.98012	6.98012	6.98012	6.98012	6.98012	6.98012	6.98012	6.98012	6.98012	6.98012	6.98012	6.98012	6.98012	6.98012	6.98012
Bluescope Steel Ltd	SUS00020			BlueScope North Star Steel plant	United States	BlueScope Steel Ltd [100%]	1	2183	2183	N/A		N/A	2183	electric	EAF	operating					0.08237	0.0869003	0.0817262	0.0783127	0.0823273	0.0823273	0.0823273	0.0823273	0.0823273	0.0823273	0.0823273	0.0823273	0.0823273	0.0823273	0.0823273	0.0823273	0.0823273	0.0823273	0.0823273	0.0823273	0.0823273	0.0823273	0.0823273	0.0823273	0.0823273	0.0823273	0.0823273	0.0823273	0.0823273
Bluescope Steel Ltd	SUS00020-1			BlueScope North Star Steel plant EAF expansion	United States	BlueScope Steel Ltd [100%]	1	850	850	N/A		N/A	850	electric	EAF	operating	2022-05-01				0	0	0.0132591	0.0304928	0.0311574	0.0311574	0.0311574	0.0311574	0.0311574	0.0311574	0.0311574	0.0311574	0.0311574	0.0311574	0.0311574	0.0311574	0.0311574	0.0311574	0.0311574	0.0311574	0.0311574	0.0311574	0.0311574	0.0311574	0.0311574	0.0311574	0.0311574	0.0311574	0.0311574
Bluescope Steel Ltd	SNZ00001			BlueScope New Zealand Steel Glenbrook	New Zealand	BlueScope Steel Ltd [100%]	1	650	650	N/A		650	N/A	integrated (DRI)	BOF, DRI	operating					1.90077	2.00531	1.88592	1.80715	1.89979	1.89979	0	0	0	0	0	0	0	0	0	0	0	0	0	0	0	0	0	0	0	0	0	0	0
Bluescope Steel Ltd	SNZ00002			Dummy - BlueScope New Zealand Steel Glenbrook	New Zealand	BlueScope Steel Ltd [100%]	1	325						integrated (DRI)	DRI, EAF	construction	2026				0	0	0	0	0	0	1.89979	1.89979	1.89979	1.89979	1.89979	1.89979	1.89979	1.89979	1.89979	1.89979	1.89979	1.89979	1.89979	1.89979	1.89979	1.89979	1.89979	1.89979	1.89979	1.89979	1.89979	1.89979	1.89979
Bluescope Steel Ltd	SUS00079			BlueScope Steel EAF plant	United States	BlueScope Steel Ltd [100%]	1	500	500	N/A		N/A	500	electric	EAF	announced					0	0	0	0	0	0	0	0	0	0	0	0	0	0	0	0	0	0	0	0	0	0	0	0	0	0	0	0	0
Total CO2 emissions																					8.96688	9.46006	8.91006	8.5557	8.99339	8.99339	8.99339	8.99339	8.99339	8.99339	8.99339	8.99339	8.99339	8.99339	8.99339	8.99339	8.99339	8.99339	8.99339	8.99339	8.99339	8.99339	8.99339	8.99339	8.99339	8.99339	8.99339	8.99339	8.99339
[truncated: 2 more columns]

[truncated: 22 more sheets: BlueScope Steel_TP, China Steel_Output, China Steel_BAU, China Steel_TP, Nippon Steel_Output, Nippon Steel_BAU, Nippon Steel_TP, POSCO_Output, POSCO_BAU, POSCO_TP, Severstal_Output, Severstal_BAU, Severstal_TP, SSAB_Output, SSAB_BAU, SSAB_TP, Tata Steel_Output, Tata Steel_BAU, Tata Steel_TP, ThyssenKrupp_Output …]
