# Supplementary material for: Assessing corporate transition plans using a production asset-based planning approach
Source: Research Square preprint supplement (doi:10.21203/rs.3.rs-5245457/v1), 2024-12-09
Supplement: Supplementary file 6 [file 1 EDF.xlsx]

## Sheet: EDF_all
Type	Country/area	Region	Subregion	Plant / Project name	Unit / Phase name	Plant / Project name (local)	Plant / Project name (other)	Capacity (MW)	Status	Start year	Retired year	Technology	Fuel	Country/area 1 (hydropower only)	Country/area 2 (hydropower only)	Country/area 1 Capacity (MW) (hydropower only)	Country/area 2 Capacity (MW) (hydropower only)	Owner	Parent	Latitude	Longitude	Location accuracy	City	Local area (taluk, county)	Major area (prefecture, district)	Subnational unit (state, province)	GEM.Wiki URL	GEM location ID	GEM unit/phase ID	CompISIN	Ownership	Plant capacity	Plant capacity	Age	Reinvestment year	Reinvestment year	Reinvestment year
bioenergy	China	Asia	Eastern Asia	Henan Lingbao power station	1	河南灵宝生物质发电项目		35	operating	2019			bioenergy - agricultural waste (solids); bioenergy - wood & other biomass (solids)					EDF (China) Investment CO LTD[65%]; Lingbao Urban Renovation Investment CO LTD[35%]		34.5514	110.936	exact	Chuankou Town	Lingbao	Sanmenxia	Henan	https://gem.wiki/Henan_Lingbao_power_station	L201644	G202001	FR0010242511	0.65	35	35	5	2059	2099	2139
coal	France	Europe	Western Europe	Albi power station	Unit 1			250	retired	1969	2006	unknown	bituminous					Electricité de France [100%]	Electricité de France [100.0%]	43.92	2.14	exact	Tarn			Occitanie	https://www.gem.wiki/Albi_power_station	L100000101865	G100000100117	FR0010242511	1	250	250	55	2009	2049	2089
coal	France	Europe	Western Europe	Blénod power station	Unit 1			250	retired	1963	2000	subcritical	bituminous					Electricité de France [100%]	Electricité de France [100.0%]	48.8691	6.08003	exact	Blénod-lès-Pont-à-Mousson		Nancy	Meurthe-et-Moselle	https://www.gem.wiki/Bl%C3%A9nod_power_station	L100000101857	G100000100958	FR0010242511	1	1427		61	2003	2043	2083
coal	France	Europe	Western Europe	Blénod power station	Unit 4			250	retired	1963	2013	subcritical	bituminous					Electricité de France [100%]	Electricité de France [100.0%]	48.8691	6.08003	exact	Blénod-lès-Pont-à-Mousson		Nancy	Meurthe-et-Moselle	https://www.gem.wiki/Bl%C3%A9nod_power_station	L100000101857	G100000100961	FR0010242511	1	1427		61	2003	2043	2083
coal	France	Europe	Western Europe	Blénod power station	Unit 3			250	retired	1963	2014	subcritical	bituminous					Electricité de France [100%]	Electricité de France [100.0%]	48.8691	6.08003	exact	Blénod-lès-Pont-à-Mousson		Nancy	Meurthe-et-Moselle	https://www.gem.wiki/Bl%C3%A9nod_power_station	L100000101857	G100000100960	FR0010242511	1	1427		61	2003	2043	2083
coal	France	Europe	Western Europe	Blénod power station	Unit 2			250	retired	1966	2013	subcritical	bituminous					Electricité de France [100%]	Electricité de France [100.0%]	48.8691	6.08003	exact	Blénod-lès-Pont-à-Mousson		Nancy	Meurthe-et-Moselle	https://www.gem.wiki/Bl%C3%A9nod_power_station	L100000101857	G100000100959	FR0010242511	1	1427	1427	58	2006	2046	2086
coal	France	Europe	Western Europe	Bouchain power station	Unit 2			250	retired	1970	2015	subcritical	anthracite					Electricité de France [100%]	Electricité de France [100.0%]	50.2972	3.31494	exact	Bouchain		Valenciennes	Nord	https://www.gem.wiki/Bouchain_power_station	L100000101860	G100000101023	FR0010242511	1	835	835	54	2010	2050	2090
coal	France	Europe	Western Europe	Cordemais power station	Unit 4			630	operating	1983	2027	subcritical	bituminous					Electricité de France [100%]	Electricité de France [100.0%]	47.2767	-1.88156	exact	Cordemais		Nantes	Loire-Atlantique	https://www.gem.wiki/Cordemais_power_station	L100000101856	G100000101703	FR0010242511	1	1260		41	2023	2063	2103
coal	France	Europe	Western Europe	Cordemais power station	Unit 5			630	operating	1984	2027	subcritical	bituminous					Electricité de France [100%]	Electricité de France [100.0%]	47.2767	-1.88156	exact	Cordemais		Nantes	Loire-Atlantique	https://www.gem.wiki/Cordemais_power_station	L100000101856	G100000101704	FR0010242511	1	1260	1260	40	2024	2064	2104
coal	United Kingdom	Europe	Northern Europe	Cottam power station	Unit 1			546	retired	1969	2019	subcritical	bituminous					EDF Energy [100%]	EDF Energy Holdings Ltd [100.0%]	53.3048	-0.781646	exact	Cottam	Bassetlaw	Nottinghamshire	England	https://www.gem.wiki/Cottam_power_station	L100000103752	G100000101712	FR0010242511	1	2184		55	2009	2049	2089
coal	United Kingdom	Europe	Northern Europe	Cottam power station	Unit 2			546	retired	1969	2019	subcritical	bituminous					EDF Energy [100%]	EDF Energy Holdings Ltd [100.0%]	53.3048	-0.781646	exact	Cottam	Bassetlaw	Nottinghamshire	England	https://www.gem.wiki/Cottam_power_station	L100000103752	G100000101713	FR0010242511	1	2184		55	2009	2049	2089
coal	United Kingdom	Europe	Northern Europe	Cottam power station	Unit 3			546	retired	1970	2019	subcritical	bituminous					EDF Energy [100%]	EDF Energy Holdings Ltd [100.0%]	53.3048	-0.781646	exact	Cottam	Bassetlaw	Nottinghamshire	England	https://www.gem.wiki/Cottam_power_station	L100000103752	G100000101714	FR0010242511	1	2184		54	2010	2050	2090
coal	United Kingdom	Europe	Northern Europe	Cottam power station	Unit 4			546	retired	1970	2019	subcritical	bituminous					EDF Energy [100%]	EDF Energy Holdings Ltd [100.0%]	53.3048	-0.781646	exact	Cottam	Bassetlaw	Nottinghamshire	England	https://www.gem.wiki/Cottam_power_station	L100000103752	G100000101715	FR0010242511	1	2184	2184	54	2010	2050	2090
coal	China	Asia	Eastern Asia	Datang Sanmenxia power station	Phase II Unit 3	大唐三门峡发电厂		630	operating	2006		supercritical	bituminous					Datang Sanmenxia Power Generation [100%]	China Datang Corp [60.0%]; EDF International SAS [35.0%]; Sanmenxia Investment Group Co Ltd [5.0%]	34.6855	111.027	exact	Daying	Shan	Sanmenxia	Henan	https://www.gem.wiki/Datang_Sanmenxia_power_station	L100000100647	G100000102155	FR0010242511	0.35	1260		18	2046	2086	2126
coal	China	Asia	Eastern Asia	Datang Sanmenxia power station	Phase II Unit 4	大唐三门峡发电厂		630	operating	2006		supercritical	bituminous					Datang Sanmenxia Power Generation [100%]	China Datang Corp [60.0%]; EDF International SAS [35.0%]; Sanmenxia Investment Group Co Ltd [5.0%]	34.6855	111.027	exact	Daying	Shan	Sanmenxia	Henan	https://www.gem.wiki/Datang_Sanmenxia_power_station	L100000100647	G100000102156	FR0010242511	0.35	1260	1260	18	2046	2086	2126
coal	China	Asia	Eastern Asia	Fuzhou power station	Phase I Unit 1	大唐抚州发电厂		1000	operating	2015		ultra-supercritical	unknown					Jiangxi Datang International Fuzhou Power Generation [100%]	Datang International Power Generation Co Ltd [51.0%]; EDF International SAS [49.0%]	27.7845	116.564	exact	Qingni Town	Linchuan	Fuzhou	Jiangxi	https://www.gem.wiki/Fuzhou_power_station	L100000101057	G100000102041	FR0010242511	0.49	4000		9	2055	2095	2135
coal	China	Asia	Eastern Asia	Fuzhou power station	Phase I Unit 2	大唐抚州发电厂		1000	operating	2016		ultra-supercritical	unknown					Jiangxi Datang International Fuzhou Power Generation [100%]	Datang International Power Generation Co Ltd [51.0%]; EDF International SAS [49.0%]	27.7845	116.564	exact	Qingni Town	Linchuan	Fuzhou	Jiangxi	https://www.gem.wiki/Fuzhou_power_station	L100000101057	G100000102042	FR0010242511	0.49	4000		8	2056	2096	2136
coal	China	Asia	Eastern Asia	Fuzhou power station	Phase II Unit 3	大唐抚州发电厂		1000	pre-permit			ultra-supercritical	unknown					Jiangxi Datang International Fuzhou Power Generation [100%]	Datang International Power Generation Co Ltd [51.0%]; EDF International SAS [49.0%]	27.7845	116.564	exact	Qingni Town	Linchuan	Fuzhou	Jiangxi	https://www.gem.wiki/Fuzhou_power_station	L100000101057	G100000114364	FR0010242511	0.49	4000		-99	40	80	120
coal	China	Asia	Eastern Asia	Fuzhou power station	Phase II Unit 4	大唐抚州发电厂		1000	pre-permit			ultra-supercritical	unknown					Jiangxi Datang International Fuzhou Power Generation [100%]	Datang International Power Generation Co Ltd [51.0%]; EDF International SAS [49.0%]	27.7845	116.564	exact	Qingni Town	Linchuan	Fuzhou	Jiangxi	https://www.gem.wiki/Fuzhou_power_station	L100000101057	G100000114365	FR0010242511	0.49	4000	4000	-99	40	80	120
coal	France	Europe	Western Europe	La Maxe power station	Unit 1			250	retired	1971	2015	subcritical	bituminous					Electricité de France [100%]	Electricité de France [100.0%]	49.1573	6.19033	exact	Woippy		Metz-Campagne	Moselle	https://www.gem.wiki/La_Maxe_power_station	L100000101859	G100000106072	FR0010242511	1	500		53	2011	2051	2091
coal	France	Europe	Western Europe	La Maxe power station	Unit 2			250	retired	1971	2015	subcritical	bituminous					Electricité de France [100%]	Electricité de France [100.0%]	49.1573	6.19033	exact	Woippy		Metz-Campagne	Moselle	https://www.gem.wiki/La_Maxe_power_station	L100000101859	G100000106073	FR0010242511	1	500	500	53	2011	2051	2091
coal	France	Europe	Western Europe	Le Havre power station	Phase 2 Unit 1			250	retired	1964	2013	subcritical	bituminous					Electricité de France [100%]	Electricité de France [100.0%]	49.4757	0.147462	exact	Le Havre		Le Havre	Seine-Maritime	https://www.gem.wiki/Le_Havre_power_station	L100000101863	G100000106206	FR0010242511	1	1480		60	2004	2044	2084
coal	France	Europe	Western Europe	Le Havre power station	Phase 2 Unit 2			600	retired	1969	2013	subcritical	bituminous					Electricité de France [100%]	Electricité de France [100.0%]	49.4757	0.147462	exact	Le Havre		Le Havre	Seine-Maritime	https://www.gem.wiki/Le_Havre_power_station	L100000101863	G100000106207	FR0010242511	1	1480		55	2009	2049	2089
coal	France	Europe	Western Europe	Le Havre power station	Phase 2 Unit 4			630	retired	1983	2021	subcritical	bituminous					Electricité de France [100%]	Electricité de France [100.0%]	49.4757	0.147462	exact	Le Havre		Le Havre	Seine-Maritime	https://www.gem.wiki/Le_Havre_power_station	L100000101863	G100000106208	FR0010242511	1	1480	1480	41	2023	2063	2103
coal	China	Asia	Eastern Asia	Liaocheng Zhonghua power station	Unit 2	聊城中华发电厂		600	operating	2002		subcritical	unknown					Shandong Zhonghua Power Generation Co Ltd Liaocheng Power Plant [100%]	China Energy Investment Corp [51.0%]; China Power Investment Co Ltd [29.4%]; EDF International SAS [19.6%]	36.4659	115.909	exact	Daokoupu Town Xin Village	Dongchangfu District	Liaocheng	Shandong	https://www.gem.wiki/Liaocheng_Zhonghua_power_station	L100000101366	G100000106248	FR0010242511	0.196	1200		22	2042	2082	2122
coal	China	Asia	Eastern Asia	Liaocheng Zhonghua power station	Unit 1	聊城中华发电厂		600	operating	2003		subcritical	unknown					Shandong Zhonghua Power Generation Co Ltd Liaocheng Power Plant [100%]	China Energy Investment Corp [51.0%]; China Power Investment Co Ltd [29.4%]; EDF International SAS [19.6%]	36.4659	115.909	exact	Daokoupu Town Xin Village	Dongchangfu District	Liaocheng	Shandong	https://www.gem.wiki/Liaocheng_Zhonghua_power_station	L100000101366	G100000106247	FR0010242511	0.196	1200	1200	21	2043	2083	2123
coal	France	Europe	Western Europe	Loire-Sur-Rhone power station	Unit 2			250	retired	1968	2005	subcritical	unknown					Electricité de France [100%]	Electricité de France [100.0%]	45.7517	5.47371	exact	Givors Cedex			Rhone	https://www.gem.wiki/Loire-Sur-Rhone_power_station	L100000104708	G100000114625	FR0010242511	1	250	250	56	2008	2048	2088
coal	Spain	Europe	Southern Europe	Puertollano IGCC power station	--			317.7	retired	1996	2016	IGCC	subbituminous					Elcogás [100%]	Endesa SA [41.0%]; EDF International SAS [31.5%]; other unknown/mixed entity types [27.5%]	38.659	-3.9806	exact	Puertollano			Ciudad Real	https://www.gem.wiki/Puertollano_IGCC_power_station	L100000103511	G100000108205	FR0010242511	0.315	317.7	317.7	28	2036	2076	2116
coal	China	Asia	Eastern Asia	Shiheng-2 power station	Unit 1	国电石横发电厂		315	operating	1987		subcritical	bituminous					Shandong Zhonghua Power Generation Co Ltd Shiheng Power Plant [100%]	China Energy Investment Corp [51.0%]; China Power Investment Co Ltd [29.4%]; EDF International SAS [19.6%]	36.2123	116.514	exact	Shiheng	Feicheng	Tai'an	Shandong	https://www.gem.wiki/Shiheng-2_power_station	L100000101399	G100000109243	FR0010242511	0.196	1260		37	2027	2067	2107
coal	China	Asia	Eastern Asia	Shiheng-2 power station	Unit 2	国电石横发电厂		315	operating	1988		subcritical	bituminous					Shandong Zhonghua Power Generation Co Ltd Shiheng Power Plant [100%]	China Energy Investment Corp [51.0%]; China Power Investment Co Ltd [29.4%]; EDF International SAS [19.6%]	36.2123	116.514	exact	Shiheng	Feicheng	Tai'an	Shandong	https://www.gem.wiki/Shiheng-2_power_station	L100000101399	G100000109244	FR0010242511	0.196	1260		36	2028	2068	2108
coal	China	Asia	Eastern Asia	Shiheng-2 power station	Unit 3	国电石横发电厂		315	operating	1997		subcritical	bituminous					Shandong Zhonghua Power Generation Co Ltd Shiheng Power Plant [100%]	China Energy Investment Corp [51.0%]; China Power Investment Co Ltd [29.4%]; EDF International SAS [19.6%]	36.2123	116.514	exact	Shiheng	Feicheng	Tai'an	Shandong	https://www.gem.wiki/Shiheng-2_power_station	L100000101399	G100000109245	FR0010242511	0.196	1260		27	2037	2077	2117
coal	China	Asia	Eastern Asia	Shiheng-2 power station	Unit 4	国电石横发电厂		315	operating	1997		subcritical	bituminous					Shandong Zhonghua Power Generation Co Ltd Shiheng Power Plant [100%]	China Energy Investment Corp [51.0%]; China Power Investment Co Ltd [29.4%]; EDF International SAS [19.6%]	36.2123	116.514	exact	Shiheng	Feicheng	Tai'an	Shandong	https://www.gem.wiki/Shiheng-2_power_station	L100000101399	G100000109246	FR0010242511	0.196	1260	1260	27	2037	2077	2117
coal	France	Europe	Western Europe	Vaires power station	Unit 1			230	retired	1962	2005	subcritical	unknown					Electricité de France [100%]	Electricité de France [100.0%]	48.8736	2.65585	exact	Vaires-sur-Marne			Seine-et-Marne	https://www.gem.wiki/Vaires_power_station	L100000104715	G100000114634	FR0010242511	1	1080		62	2002	2042	2082
coal	France	Europe	Western Europe	Vaires power station	Unit 2			250	retired	1966	2005	subcritical	unknown					Electricité de France [100%]	Electricité de France [100.0%]	48.8736	2.65585	exact	Vaires-sur-Marne			Seine-et-Marne	https://www.gem.wiki/Vaires_power_station	L100000104715	G100000114635	FR0010242511	1	1080	1080	58	2006	2046	2086
coal	France	Europe	Western Europe	Vitry power station	Unit 3			270	retired	1970	2015	subcritical	bituminous					Electricité de France [100%]	Electricité de France [100.0%]	48.7916	2.41669	exact	Vitry-sur-Seine		Créteil	Val-de-Marne	https://www.gem.wiki/Vitry_power_station	L100000101864	G100000110625	FR0010242511	1	540		54	2010	2050	2090
coal	France	Europe	Western Europe	Vitry power station	Unit 4			270	retired	1971	2015	subcritical	bituminous					Electricité de France [100%]	Electricité de France [100.0%]	48.7916	2.41669	exact	Vitry-sur-Seine		Créteil	Val-de-Marne	https://www.gem.wiki/Vitry_power_station	L100000101864	G100000110626	FR0010242511	1	540	540	53	2011	2051	2091
coal	United Kingdom	Europe	Northern Europe	West Burton power station	Unit 1			547	retired	1967	2022	subcritical	bituminous					EDF Energy [100%]	EDF Energy Holdings Ltd [100.0%]	53.3627	-0.811836	exact	Sturton-le-Steeple	Bassetlaw	Nottinghamshire	England	https://www.gem.wiki/West_Burton_power_station	L100000103762	G100000110893	FR0010242511	1	2487		57	2007	2047	2087
coal	United Kingdom	Europe	Northern Europe	West Burton power station	Unit 2			547	retired	1967	2022	subcritical	bituminous					EDF Energy [100%]	EDF Energy Holdings Ltd [100.0%]	53.3627	-0.811836	exact	Sturton-le-Steeple	Bassetlaw	Nottinghamshire	England	https://www.gem.wiki/West_Burton_power_station	L100000103762	G100000110894	FR0010242511	1	2487		57	2007	2047	2087
coal	United Kingdom	Europe	Northern Europe	West Burton power station	Unit 3			547	retired	1967	2023	subcritical	bituminous					EDF Energy [100%]	EDF Energy Holdings Ltd [100.0%]	53.3627	-0.811836	exact	Sturton-le-Steeple	Bassetlaw	Nottinghamshire	England	https://www.gem.wiki/West_Burton_power_station	L100000103762	G100000110895	FR0010242511	1	2487		57	2007	2047	2087
coal	United Kingdom	Europe	Northern Europe	West Burton power station	Unit 4			547	retired	1967	2023	subcritical	bituminous					EDF Energy [100%]	EDF Energy Holdings Ltd [100.0%]	53.3627	-0.811836	exact	Sturton-le-Steeple	Bassetlaw	Nottinghamshire	England	https://www.gem.wiki/West_Burton_power_station	L100000103762	G100000110896	FR0010242511	1	2487	2487	57	2007	2047	2087
hydropower	France	Europe	Western Europe	Aussois hydroelectric plant				87	operating	1947		conventional storage				TRUE	FALSE	EDF Energy		45.2518	6.7236	exact		Savoy		Auvergne-Rhône-Alpes	https://gem.wiki/Aussois_hydroelectric_plant	L601620	G601639	FR0010242511	1	87	87	77	1987	2027	2067
hydropower	France	Europe	Western Europe	Bâthie hydroelectric plant			La Bâthie	600	operating	1961		conventional storage				TRUE	FALSE	EDF Energy		45.6452	6.4443	exact		Savoy		Auvergne-Rhône-Alpes	https://gem.wiki/Bâthie_hydroelectric_plant	L601622	G601641	FR0010242511	1	600	600	63	2001	2041	2081
hydropower	France	Europe	Western Europe	Bort hydroelectric plant			Bort les Orgues	235	operating	1952		conventional storage				TRUE	FALSE	EDF Energy		45.4127	2.4986	exact		Cantal		Auvergne-Rhône-Alpes	https://gem.wiki/Bort_hydroelectric_plant	L601627	G601646	FR0010242511	1	235	235	72	1992	2032	2072
hydropower	France	Europe	Western Europe	Brommat hydroelectric plant				406	operating	1933		conventional storage				TRUE	FALSE	EDF Energy		44.7682	2.6834	exact		Aveyron		Occitania	https://gem.wiki/Brommat_hydroelectric_plant	L601629	G601648	FR0010242511	1	406	406	91	1973	2013	2053
hydropower	France	Europe	Western Europe	Chastang hydroelectric plant				293	operating	1951		run-of-river				TRUE	FALSE	EDF Energy		45.1518	2.0098	exact		Corrèze		Nouvelle-Aquitaine	https://gem.wiki/Chastang_hydroelectric_plant	L601631	G601650	FR0010242511	1	293	293	73	1991	2031	2071
hydropower	France	Europe	Western Europe	Châtelard-Vallorcine hydroelectric plant				260	operating	1978		conventional and pumped storage				TRUE	TRUE	Alpiq Suisse SA [50%]; Electricité de France (EDF) [50%]		46.0513	6.9488	exact		Upper Savoy		Auvergne-Rhône-Alpes	https://gem.wiki/Châtelard-Vallorcine_hydroelectric_plant	L604087	G604126	FR0010242511	0.5	260	260	46	2018	2058	2098
hydropower	France	Europe	Western Europe	Cheylas hydroelectric plant			Le Cheylas	485	operating	1979		pumped storage				TRUE	FALSE	EDF Energy		45.3865	6.0013	exact		Isère		Auvergne-Rhône-Alpes	https://gem.wiki/Cheylas_hydroelectric_plant	L601633	G601652	FR0010242511	1	485	485	45	2019	2059	2099
hydropower	France	Europe	Western Europe	Coche hydroelectric plant			La Coche	384	operating	1976		pumped storage				TRUE	FALSE	EDF Energy		45.4968	6.5103	exact		Savoy		Auvergne-Rhône-Alpes	https://gem.wiki/Coche_hydroelectric_plant	L601634	G601653	FR0010242511	1	384	384	48	2016	2056	2096
hydropower	France	Europe	Western Europe	Combe D'Avrieux hydroelectric plant				123	operating	1975		conventional storage				TRUE	FALSE	EDF Energy		45.215	6.712	exact		Savoy		Auvergne-Rhône-Alpes	https://gem.wiki/Combe_D'Avrieux_hydroelectric_plant	L601635	G601654	FR0010242511	1	123	123	49	2015	2055	2095
hydropower	France	Europe	Western Europe	Couesque hydroelectric plant				119	operating	1950		run-of-river				TRUE	FALSE	EDF Energy		44.6953	2.5825	exact		Aveyron		Occitania	https://gem.wiki/Couesque_hydroelectric_plant	L601636	G601655	FR0010242511	1	119	119	74	1990	2030	2070
hydropower	France	Europe	Western Europe	Curbans hydroelectric plant				139	operating	1966		conventional storage				TRUE	FALSE	EDF Energy		47.915	6.0616	exact		Haute-Saône		Bourgogne-Franche-Comté	https://gem.wiki/Curbans_hydroelectric_plant	L601637	G601656	FR0010242511	1	139	139	58	2006	2046	2086
hydropower	France	Europe	Western Europe	Fessenheim hydroelectric plant				175	operating	1956		run-of-river				TRUE	FALSE	EDF Energy		47.9146	7.5706	exact		Haut-Rhin		Grand Est	https://gem.wiki/Fessenheim_hydroelectric_plant	L601638	G601657	FR0010242511	1	175	175	68	1996	2036	2076
hydropower	Switzerland	Europe	Western Europe	Fionnay-Mauvoisin hydroelectric plant				140	operating	1958		conventional storage				TRUE	FALSE	Axpo Holding AG [29.25%]; Forces Motrices de la Suisse Centrale SA (CKW) [19.5%]; Axpo Power AG [19.5%]; BKW FMB Energie SA [19.5%]; Electricité de France (EDF) [9.75%]; Municipality of Bagnes [2.5%]		46.0304	7.308	exact		Entremont		Wallis	https://gem.wiki/Fionnay-Mauvoisin_hydroelectric_plant	L603487	G603522	FR0010242511	0.0975	140	140	66	1998	2038	2078
hydropower	France	Europe	Western Europe	Gerstheim hydroelectric plant				141	operating	1967		run-of-river				TRUE	FALSE	EDF Energy		48.4021	7.7272	exact		Bas-Rhin		Grand Est	https://gem.wiki/Gerstheim_hydroelectric_plant	L601640	G601659	FR0010242511	1	141	141	57	2007	2047	2087
hydropower	France	Europe	Western Europe	Grand Maison hydroelectric plant				1713	operating	1987		pumped storage				TRUE	FALSE	EDF Energy		45.1454	6.0515	exact		Isère		Auvergne-Rhône-Alpes	https://gem.wiki/Grand_Maison_hydroelectric_plant	L601642	G601661	FR0010242511	1	1713	1713	37	2027	2067	2107
hydropower	France	Europe	Western Europe	Hermillon hydroelectric plant				119	operating	1974		run-of-river				TRUE	FALSE	EDF Energy		45.2848	6.3615	exact		Savoy		Auvergne-Rhône-Alpes	https://gem.wiki/Hermillon_hydroelectric_plant	L601644	G601663	FR0010242511	1	119	119	50	2014	2054	2094
hydropower	France	Europe	Western Europe	Iffezheim hydroelectric plant				146	operating	1978		run-of-river				TRUE	TRUE	EnBW Energie Baden-Württemberg AG (EnBW) [50%]; Electricité de France (EDF) [50%]		48.8325	8.1115	exact		Bas-Rhin		Grand Est	https://gem.wiki/Iffezheim_hydroelectric_plant	L604088	G604127	FR0010242511	0.5	146	146	46	2018	2058	2098
hydropower	France	Europe	Western Europe	Kembs hydroelectric plant				162	operating	1932		run-of-river				TRUE	FALSE	EDF Energy		47.6548	7.5183	exact		Haut-Rhin		Grand Est	https://gem.wiki/Kembs_hydroelectric_plant	L601645	G601664	FR0010242511	1	162	162	92	1972	2012	2052
hydropower	Switzerland	Europe	Western Europe	La Batiaz hydroelectric plant				170	operating	1978		conventional storage				TRUE	FALSE	Alpiq Suisse SA [50%]; Electricité de France (EDF) [50%]		46.1098	7.0618	exact		Martigny		Wallis	https://gem.wiki/La_Batiaz_hydroelectric_plant	L603498	G603533	FR0010242511	0.5	170	170	46	2018	2058	2098
hydropower	France	Europe	Western Europe	La Saussaz-II hydroelectric plant			La Saussaz	150	operating	1973		run-of-river				TRUE	FALSE	EDF Energy		45.211	6.475	exact		Savoy		Auvergne-Rhône-Alpes	https://gem.wiki/La_Saussaz-II_hydroelectric_plant	L601648	G601667	FR0010242511	1	150	150	51	2013	2053	2093
hydropower	France	Europe	Western Europe	L'Aigle hydroelectric plant				360	operating	1945		conventional storage				TRUE	FALSE	EDF Energy		45.2438	2.2248	exact		Corrèze		Nouvelle-Aquitaine	https://gem.wiki/L'Aigle_hydroelectric_plant	L601646	G601665	FR0010242511	1	360	360	79	1985	2025	2065
hydropower	France	Europe	Western Europe	Laval De Cere hydroelectric plant			Laval-De-Cere	96	operating	1967		run-of-river				TRUE	FALSE	EDF Energy		44.9532	1.9495	exact		Lot		Occitania	https://gem.wiki/Laval_De_Cere_hydroelectric_plant	L601649	G601668	FR0010242511	1	96	96	57	2007	2047	2087
hydropower	France	Europe	Western Europe	Le Sautet hydroelectric plant				76	operating	1931		conventional storage				TRUE	FALSE	EDF Energy		44.8166	5.9084	exact	Pellafol	Isère		Auvergne-Rhône-Alpes	https://gem.wiki/Le_Sautet_hydroelectric_plant	L601650	G601669	FR0010242511	1	76	76	93	1971	2011	2051
hydropower	France	Europe	Western Europe	Les Brevieres hydroelectric plant			Brevieres	90	operating	1952		conventional storage				TRUE	FALSE	EDF Energy		45.5042	6.9247	exact		Savoy		Auvergne-Rhône-Alpes	https://gem.wiki/Les_Brevieres_hydroelectric_plant	L601651	G601670	FR0010242511	1	90	90	72	1992	2032	2072
hydropower	France	Europe	Western Europe	L'Hospitalet hydroelectric plant			Hospitalet	93	operating	1960		conventional storage				TRUE	FALSE	EDF Energy		42.5879	1.7972	exact		Ariège		Occitania	https://gem.wiki/L'Hospitalet_hydroelectric_plant	L601647	G601666	FR0010242511	1	93	93	64	2000	2040	2080
hydropower	France	Europe	Western Europe	Malgovert hydroelectric plant				297	operating	1953		conventional storage				TRUE	FALSE	EDF Energy		45.6178	6.791	exact		Savoy		Auvergne-Rhône-Alpes	https://gem.wiki/Malgovert_hydroelectric_plant	L601653	G601672	FR0010242511	1	297	297	71	1993	2033	2073
hydropower	France	Europe	Western Europe	Mallemort hydroelectric plant				99	operating	1971		conventional storage				TRUE	FALSE	EDF Energy		43.7161	5.2061	exact		Bouches-du-Rhône		Provence-Alpes-Côte d'Azur	https://gem.wiki/Mallemort_hydroelectric_plant	L601654	G601673	FR0010242511	1	99	99	53	2011	2051	2091
hydropower	France	Europe	Western Europe	Marckolsheim hydroelectric plant				156	operating	1961		run-of-river				TRUE	FALSE	EDF Energy		48.1537	7.5898	exact		Bas-Rhin		Grand Est	https://gem.wiki/Marckolsheim_hydroelectric_plant	L601655	G601674	FR0010242511	1	156	156	63	2001	2041	2081
hydropower	France	Europe	Western Europe	Montahut hydroelectric plant				95	operating	1966		conventional storage				TRUE	FALSE	EDF Energy		43.5708	2.9397	exact		Hérault		Occitania	https://gem.wiki/Montahut_hydroelectric_plant	L601657	G601676	FR0010242511	1	95	95	58	2006	2046	2086
hydropower	France	Europe	Western Europe	Monteynard hydroelectric plant				366	operating	1962		conventional storage				TRUE	FALSE	EDF Energy		44.8722	5.7726	exact		Isère		Auvergne-Rhône-Alpes	https://gem.wiki/Monteynard_hydroelectric_plant	L601658	G601677	FR0010242511	1	366	366	62	2002	2042	2082
hydropower	France	Europe	Western Europe	Montézic hydroelectric plant				910	operating	1982		pumped storage				TRUE	FALSE	EDF Energy		44.7372	2.6432	exact		Aveyron		Occitania	https://gem.wiki/Montézic_hydroelectric_plant	L601659	G601678	FR0010242511	1	910	910	42	2022	2062	2102
hydropower	France	Europe	Western Europe	Montpezat hydroelectric plant				132	operating	1954		conventional storage				TRUE	FALSE	EDF Energy		43.7514	6.0888	exact	Montagnac-Montpezat	Alpes-de-Haute-Provence		Provence-Alpes-Côte d'Azur	https://gem.wiki/Montpezat_hydroelectric_plant	L601660	G601679	FR0010242511	1	132	132	70	1994	2034	2074
hydropower	Malawi	Africa	Sub-Saharan Africa	Mpatamanga Gorge hydroelectric plant			Mpatamanga Main	308	pre-construction	2028		conventional storage				TRUE	FALSE	Electricity Generation CO Malawi LTD [30%]; EDF Energy [27.5%]; Scatec ASA [14%]; British International Investment [13.5%]; Norwegian Norfund [13.5%]		-15.7172	34.7264	exact				Neno	https://gem.wiki/Mpatamanga_Gorge_hydroelectric_plant	L602430	G602461	FR0010242511	0.275	308	308	-4	2068	2108	2148
hydropower	Cameroon	Africa	Sub-Saharan Africa	Nachtigal hydroelectric plant			Nachtigal Amont	420	construction	2024		run-of-river				TRUE	FALSE	EDF Energy [40%]; International Finance CORP (IFC) [20%]; Republic of Cameroon [15%]; Africa50 Infrastructure Fund [15%]; Stoa Infra & Energy [10%]		4.3541	11.6152	exact		Lekié		Centre	https://gem.wiki/Nachtigal_hydroelectric_plant	L600391	G600392	FR0010242511	0.4	420	420	0	2064	2104	2144
hydropower	Laos	Asia	South-eastern Asia	Nam Theun 2 hydroelectric plant			Nam Theun II hydroelectric plant	1070	operating	2020		conventional storage				TRUE	FALSE	Electricité de France (EDF) [35%]; Electricity Generating Public CO LTD (EGCO) [25%]; Government Of Lao People’s Democratic Republic [25%]; Italian-Thai Development PLC [15%]		17.9965	104.954	exact		Khamkeut District		Bolikhamsai	https://gem.wiki/Nam_Theun_2_hydroelectric_plant	L602396	G602426	FR0010242511	0.35	1070	1070	4	2060	2100	2140
hydropower	France	Europe	Western Europe	Oraison hydroelectric plant				188	operating	1962		conventional storage				TRUE	FALSE	EDF Energy		43.9212	5.9253	exact		Alpes-de-Haute-Provence		Provence-Alpes-Côte d'Azur	https://gem.wiki/Oraison_hydroelectric_plant	L601661	G601680	FR0010242511	1	188	188	62	2002	2042	2082
hydropower	France	Europe	Western Europe	Orlu hydroelectric plant				89	operating	1959		conventional storage				TRUE	FALSE	EDF Energy		42.6893	1.9119	exact		Ariège		Occitania	https://gem.wiki/Orlu_hydroelectric_plant	L601662	G601681	FR0010242511	1	89	89	65	1999	2039	2079
hydropower	France	Europe	Western Europe	Ottmarsheim hydroelectric plant				156	operating	1952		run-of-river				TRUE	FALSE	EDF Energy		47.7741	7.5225	exact		Haut-Rhin		Grand Est	https://gem.wiki/Ottmarsheim_hydroelectric_plant	L601663	G601682	FR0010242511	1	156	156	72	1992	2032	2072
hydropower	France	Europe	Western Europe	Passy hydroelectric plant				104	operating	1951		run-of-river				TRUE	FALSE	EDF Energy		45.917	6.7272	exact		Upper Savoy		Auvergne-Rhône-Alpes	https://gem.wiki/Passy_hydroelectric_plant	L601664	G601683	FR0010242511	1	104	104	73	1991	2031	2071
hydropower	French Guiana	Americas	Latin America and the Caribbean	Petit Saut hydroelectric plant				116	operating	1994		conventional storage				TRUE	FALSE	EDF Energy		5.063	-53.0476	exact				French Guiana	https://gem.wiki/Petit_Saut_hydroelectric_plant	L601692	G601711	FR0010242511	1	116	116	30	2034	2074	2114
hydropower	France	Europe	Western Europe	Pied De Borne hydroelectric plant				109	operating	1965		conventional storage				TRUE	FALSE	EDF Energy		44.4788	3.9858	exact		Lozère		Occitania	https://gem.wiki/Pied_De_Borne_hydroelectric_plant	L601665	G601684	FR0010242511	1	109	109	59	2005	2045	2085
hydropower	France	Europe	Western Europe	Pouget hydroelectric plant				447	operating	1951		conventional storage				TRUE	FALSE	EDF Energy		44.0597	2.7701	exact		Aveyron		Occitania	https://gem.wiki/Pouget_hydroelectric_plant	L601667	G601686	FR0010242511	1	447	447	73	1991	2031	2071
hydropower	France	Europe	Western Europe	Pragneres hydroelectric plant				189	operating	1954		conventional storage				TRUE	FALSE	EDF Energy		42.8205	0.0102	exact		Gavarnie-Gèdre		Occitania	https://gem.wiki/Pragneres_hydroelectric_plant	L601668	G601687	FR0010242511	1	189	189	70	1994	2034	2074
hydropower	France	Europe	Western Europe	Randens hydroelectric plant				124	operating	1954		run-of-river				TRUE	FALSE	EDF Energy		45.5275	6.3208	exact		Savoy		Auvergne-Rhône-Alpes	https://gem.wiki/Randens_hydroelectric_plant	L601669	G601688	FR0010242511	1	124	124	70	1994	2034	2074
hydropower	France	Europe	Western Europe	Revin hydroelectric plant			Revin Saint Nicolas	808	operating	1976		pumped storage				TRUE	FALSE	EDF Energy		49.9276	4.6171	exact		Ardennes		Grand Est	https://gem.wiki/Revin_hydroelectric_plant	L601670	G601689	FR0010242511	1	808	808	48	2016	2056	2096
hydropower	France	Europe	Western Europe	Rhinau hydroelectric plant				152	operating	1963		run-of-river				TRUE	FALSE	EDF Energy		48.2844	7.6768	exact		Bas-Rhin		Grand Est	https://gem.wiki/Rhinau_hydroelectric_plant	L601671	G601690	FR0010242511	1	152	152	61	2003	2043	2083
hydropower	Switzerland	Europe	Western Europe	Riddes hydroelectric plant				258	operating	1956		conventional storage				TRUE	FALSE	Axpo Holding AG [29.25%]; Forces Motrices de la Suisse Centrale SA (CKW) [19.5%]; Axpo Power AG [19.5%]; BKW FMB Energie SA [19.5%]; Electricité de France (EDF) [9.75%]; Municipality of Bagnes [2.5%]		46.1574	7.2093	exact		Martigny		Wallis	https://gem.wiki/Riddes_hydroelectric_plant	L603513	G603548	FR0010242511	0.0975	258	258	68	1996	2036	2076
hydropower	France	Europe	Western Europe	Romanche Gavet hydroelectric plant				97	operating	2020		run-of-river				TRUE	FALSE	EDF Energy		45.1172	5.9613	exact	Livet-et-Gavet	Isère		Auvergne-Rhône-Alpes	https://gem.wiki/Romanche_Gavet_hydroelectric_plant	L601672	G601691	FR0010242511	1	97	97	4	2060	2100	2140
hydropower	France	Europe	Western Europe	Saint Chamas hydroelectric plant				159	operating	1966		conventional storage				TRUE	FALSE	EDF Energy		43.529	5.0741	exact		Bouches-du-Rhône		Provence-Alpes-Côte d'Azur	https://gem.wiki/Saint_Chamas_hydroelectric_plant	L601674	G601693	FR0010242511	1	159	159	58	2006	2046	2086
hydropower	France	Europe	Western Europe	Saint Estève hydroelectric plant				146	operating	1963		conventional storage				TRUE	FALSE	EDF Energy		43.692	5.385	exact		Bouches-du-Rhône		Provence-Alpes-Côte d'Azur	https://gem.wiki/Saint_Estève_hydroelectric_plant	L601675	G601694	FR0010242511	1	146	146	61	2003	2043	2083
hydropower	France	Europe	Western Europe	Saint Guillerme hydroelectric plant			Saint Guillerme II	116	operating	1983		conventional storage				TRUE	FALSE	EDF Energy		45.029	6.0717	exact	Auris	Isère		Auvergne-Rhône-Alpes	https://gem.wiki/Saint_Guillerme_hydroelectric_plant	L601676	G601695	FR0010242511	1	116	116	41	2023	2063	2103
hydropower	France	Europe	Western Europe	Saint Pierre Cognet hydroelectric plant				101	operating	1957		run-of-river				TRUE	FALSE	EDF Energy		44.8725	5.7732	exact		Isère		Auvergne-Rhône-Alpes	https://gem.wiki/Saint_Pierre_Cognet_hydroelectric_plant	L601677	G601696	FR0010242511	1	101	101	67	1997	2037	2077
hydropower	France	Europe	Western Europe	Sainte Croix hydroelectric plant				132	operating	1974		conventional storage				TRUE	FALSE	EDF Energy		43.7375	6.1343	exact		Alpes-de-Haute-Provence		Provence-Alpes-Côte d'Azur	https://gem.wiki/Sainte_Croix_hydroelectric_plant	L601680	G601699	FR0010242511	1	132	132	50	2014	2054	2094
hydropower	France	Europe	Western Europe	Sainte Tulle hydroelectric plant			Sainte Tulle I&II	97	operating	1925		conventional storage				TRUE	FALSE	EDF Energy		43.7865	5.774	exact		Alpes-de-Haute-Provence		Provence-Alpes-Côte d'Azur	https://gem.wiki/Sainte_Tulle_hydroelectric_plant	L601681	G601700	FR0010242511	1	97	97	99	1965	2005	2045
hydropower	France	Europe	Western Europe	Saint-Etienne-Cantales hydroelectric plant				103	operating	1945		conventional storage				TRUE	FALSE	EDF Energy		44.9453	2.2184	exact		Cantal		Auvergne-Rhône-Alpes	https://gem.wiki/Saint-Etienne-Cantales_hydroelectric_plant	L601679	G601698	FR0010242511	1	103	103	79	1985	2025	2065
hydropower	France	Europe	Western Europe	Salignac hydroelectric plant				78	operating	1976		conventional storage				TRUE	FALSE	EDF Energy		44.1371	5.9789	exact		Alpes-de-Haute-Provence		Provence-Alpes-Côte d'Azur	https://gem.wiki/Salignac_hydroelectric_plant	L601682	G601701	FR0010242511	1	78	78	48	2016	2056	2096
hydropower	France	Europe	Western Europe	Salon hydroelectric plant				96	operating	1966		conventional storage				TRUE	FALSE	EDF Energy		43.6331	5.1148	exact		Bouches-du-Rhône		Provence-Alpes-Côte d'Azur	https://gem.wiki/Salon_hydroelectric_plant	L601683	G601702	FR0010242511	1	96	96	58	2006	2046	2086
hydropower	France	Europe	Western Europe	Sarrans hydroelectric plant				183	operating	1934		conventional storage				TRUE	FALSE	EDF Energy		44.828	2.7395	exact		Aveyron		Occitania	https://gem.wiki/Sarrans_hydroelectric_plant	L601684	G601703	FR0010242511	1	183	183	90	1974	2014	2054
hydropower	France	Europe	Western Europe	Serre Ponçon hydroelectric plant				384	operating	1960		conventional storage				TRUE	FALSE	EDF Energy		44.4709	6.2696	exact		Hautes-Alpes		Provence-Alpes-Côte d'Azur	https://gem.wiki/Serre_Ponçon_hydroelectric_plant	L601685	G601704	FR0010242511	1	384	384	64	2000	2040	2080
hydropower	Brazil	Americas	Latin America and the Caribbean	Sinop hydroelectric plant		Usina Hidrelétrica Sinop		402	operating	2019		conventional storage				TRUE	FALSE	EDF Norte Fluminense [51%]; Eletrobras Eletronorte [24.5%]; Companhia Hidro Elétrica do São Francisco SA (CHESF) [24.5%]		-11.2667	-55.4501	exact			Região Geográfica Intermediária de Sinop	Mato Grosso	https://gem.wiki/Sinop_hydroelectric_plant	L600349	G600350	FR0010242511	0.51	402	402	5	2059	2099	2139
hydropower	France	Europe	Western Europe	Sisteron hydroelectric plant				240	operating	1975		conventional storage				TRUE	FALSE	EDF Energy		44.2093	5.9186	exact		Alpes-de-Haute-Provence		Provence-Alpes-Côte d'Azur	https://gem.wiki/Sisteron_hydroelectric_plant	L601686	G601705	FR0010242511	1	240	240	49	2015	2055	2095
hydropower	France	Europe	Western Europe	Strasbourg hydroelectric plant				148	operating	1969		run-of-river				TRUE	FALSE	EDF Energy		48.5256	7.7966	exact	Strasbourg	Bas-Rhin		Grand Est	https://gem.wiki/Strasbourg_hydroelectric_plant	L601687	G601706	FR0010242511	1	148	148	55	2009	2049	2089
hydropower	France	Europe	Western Europe	Super Bissorte hydroelectric plant			Bissorte	742	operating	1987		pumped storage				TRUE	FALSE	EDF Energy		45.2047	6.5779	exact		Savoy		Auvergne-Rhône-Alpes	https://gem.wiki/Super_Bissorte_hydroelectric_plant	L601688	G601707	FR0010242511	1	742	742	37	2027	2067	2107
hydropower	France	Europe	Western Europe	Villarodin hydroelectric plant			Mont-Cenis	364	operating	1968		conventional storage				TRUE	FALSE	EDF Energy		45.2128	6.7164	exact		Savoy		Auvergne-Rhône-Alpes	https://gem.wiki/Villarodin_hydroelectric_plant	L601689	G601708	FR0010242511	1	364	364	56	2008	2048	2088
hydropower	France	Europe	Western Europe	Vogelgrün hydroelectric plant				141	operating	1959		run-of-river				TRUE	FALSE	EDF Energy		48.0199	7.5733	exact		Haut-Rhin		Grand Est	https://gem.wiki/Vogelgrün_hydroelectric_plant	L601690	G601709	FR0010242511	1	141	141	65	1999	2039	2079
hydropower	France	Europe	Western Europe	Vouglans hydroelectric plant				285	operating	1968		conventional storage				TRUE	FALSE	EDF Energy		46.3968	5.6634	exact		Jura		Bourgogne-Franche-Comté	https://gem.wiki/Vouglans_hydroelectric_plant	L601691	G601710	FR0010242511	1	285	285	56	2008	2048	2088
nuclear	France	Europe	Western Europe	Belleville nuclear power plant	1			1363	operating	1988		pressurized water reactor						Electricité De France (EDF)		47.5103	2.87501	exact		Nièvre		Bourgogne-Franche-Comté	https://gem.wiki/Belleville_nuclear_power_plant	L500035	G500060	FR0010242511	1	2726		36	2028	2068	2108
nuclear	France	Europe	Western Europe	Belleville nuclear power plant	2			1363	operating	1989		pressurized water reactor						Electricité De France (EDF)		47.5103	2.87501	exact		Nièvre		Bourgogne-Franche-Comté	https://gem.wiki/Belleville_nuclear_power_plant	L500035	G500061	FR0010242511	1	2726	2726	35	2029	2069	2109
nuclear	France	Europe	Western Europe	Blayais nuclear power plant	1			951	operating	1981		pressurized water reactor						Electricité De France (EDF)		45.256	-0.6932	exact		Gironde		Nouvelle-Aquitaine	https://gem.wiki/Blayais_nuclear_power_plant	L500134	G500293	FR0010242511	1	3804		43	2021	2061	2101
nuclear	France	Europe	Western Europe	Blayais nuclear power plant	2			951	operating	1983		pressurized water reactor						Electricité De France (EDF)		45.256	-0.6932	exact		Gironde		Nouvelle-Aquitaine	https://gem.wiki/Blayais_nuclear_power_plant	L500134	G500294	FR0010242511	1	3804		41	2023	2063	2103
nuclear	France	Europe	Western Europe	Blayais nuclear power plant	3			951	operating	1983		pressurized water reactor						Electricité De France (EDF)		45.256	-0.6932	exact		Gironde		Nouvelle-Aquitaine	https://gem.wiki/Blayais_nuclear_power_plant	L500134	G500295	FR0010242511	1	3804		41	2023	2063	2103
nuclear	France	Europe	Western Europe	Blayais nuclear power plant	4			951	operating	1983		pressurized water reactor						Electricité De France (EDF)		45.256	-0.6932	exact		Gironde		Nouvelle-Aquitaine	https://gem.wiki/Blayais_nuclear_power_plant	L500134	G500296	FR0010242511	1	3804	3804	41	2023	2063	2103
nuclear	United Kingdom	Europe	Northern Europe	Bradwell B nuclear power plant	1			1150	pre-construction			pressurized water reactor						China National Nuclear CORP [66.5%]; EDF Energy [33.5%]		51.7428	0.9047	exact		Essex		England	https://gem.wiki/Bradwell_B_nuclear_power_plant	L500294	G500710	FR0010242511	0.335	1150	1150	-99	40	80	120
nuclear	France	Europe	Western Europe	Brennilis nuclear power plant			EL-4 (Monts d'Arree)	75	retired	1968	1985	heavy water gas-cooled reactor						Electricité De France (EDF)		48.3551	-3.8719	exact		Finistère		Brittany	https://gem.wiki/Brennilis_nuclear_power_plant	L500244	G500589	FR0010242511	1	75	75	56	2008	2048	2088
nuclear	France	Europe	Western Europe	Bugey nuclear power plant	1			555	retired	1972	1994	gas-cooled reactor						Electricité De France (EDF)		45.7973	5.2706	exact		Isère		Auvergne-Rhône-Alpes	https://gem.wiki/Bugey_nuclear_power_plant	L500136	G500394	FR0010242511	1	7579		52	2012	2052	2092
nuclear	France	Europe	Western Europe	Bugey nuclear power plant	2			945	operating	1979		pressurized water reactor						Electricité De France (EDF)		45.7973	5.2706	exact		Isère		Auvergne-Rhône-Alpes	https://gem.wiki/Bugey_nuclear_power_plant	L500136	G500303	FR0010242511	1	7579		45	2019	2059	2099
nuclear	France	Europe	Western Europe	Bugey nuclear power plant	3			945	operating	1979		pressurized water reactor						Electricité De France (EDF)		45.7973	5.2706	exact		Isère		Auvergne-Rhône-Alpes	https://gem.wiki/Bugey_nuclear_power_plant	L500136	G500304	FR0010242511	1	7579		45	2019	2059	2099
nuclear	France	Europe	Western Europe	Bugey nuclear power plant	4			917	operating	1979		pressurized water reactor						Electricité De France (EDF)		45.7973	5.2706	exact		Isère		Auvergne-Rhône-Alpes	https://gem.wiki/Bugey_nuclear_power_plant	L500136	G500309	FR0010242511	1	7579		45	2019	2059	2099
nuclear	France	Europe	Western Europe	Bugey nuclear power plant	5			917	operating	1980		pressurized water reactor						Electricité De France (EDF)		45.7973	5.2706	exact		Isère		Auvergne-Rhône-Alpes	https://gem.wiki/Bugey_nuclear_power_plant	L500136	G500310	FR0010242511	1	7579		44	2020	2060	2100
nuclear	France	Europe	Western Europe	Bugey nuclear power plant	6			1650	announced			pressurized water reactor						Electricité De France (EDF)		45.7973	5.2706	exact		Isère		Auvergne-Rhône-Alpes	https://gem.wiki/Bugey_nuclear_power_plant	L500136	G501176	FR0010242511	1	7579		-99	40	80	120
nuclear	France	Europe	Western Europe	Bugey nuclear power plant	7			1650	announced			pressurized water reactor						Electricité De France (EDF)		45.7973	5.2706	exact		Isère		Auvergne-Rhône-Alpes	https://gem.wiki/Bugey_nuclear_power_plant	L500136	G501177	FR0010242511	1	7579	7579	-99	40	80	120
nuclear	France	Europe	Western Europe	Cattenom nuclear power plant	1			1362	operating	1987		pressurized water reactor						Electricité De France (EDF)		49.416	6.2169	exact		Moselle		Grand Est	https://gem.wiki/Cattenom_nuclear_power_plant	L500038	G500066	FR0010242511	1	5448		37	2027	2067	2107
nuclear	France	Europe	Western Europe	Cattenom nuclear power plant	2			1362	operating	1988		pressurized water reactor						Electricité De France (EDF)		49.416	6.2169	exact		Moselle		Grand Est	https://gem.wiki/Cattenom_nuclear_power_plant	L500038	G500067	FR0010242511	1	5448		36	2028	2068	2108
nuclear	France	Europe	Western Europe	Cattenom nuclear power plant	3			1362	operating	1991		pressurized water reactor						Electricité De France (EDF)		49.416	6.2169	exact		Moselle		Grand Est	https://gem.wiki/Cattenom_nuclear_power_plant	L500038	G500068	FR0010242511	1	5448		33	2031	2071	2111
nuclear	France	Europe	Western Europe	Cattenom nuclear power plant	4			1362	operating	1992		pressurized water reactor						Electricité De France (EDF)		49.416	6.2169	exact		Moselle		Grand Est	https://gem.wiki/Cattenom_nuclear_power_plant	L500038	G500069	FR0010242511	1	5448	5448	32	2032	2072	2112
nuclear	France	Europe	Western Europe	Chinon nuclear power plant	A-1			80	retired	1964	1973	gas-cooled reactor						Electricité De France (EDF)		47.2254	0.1656	exact		Indre-et-Loire		Centre-Val de Loire	https://gem.wiki/Chinon_nuclear_power_plant	L500133	G500575	FR0010242511	1	4606		60	2004	2044	2084
nuclear	France	Europe	Western Europe	Chinon nuclear power plant	A-2			230	retired	1965	1985	gas-cooled reactor						Electricité De France (EDF)		47.2254	0.1656	exact		Indre-et-Loire		Centre-Val de Loire	https://gem.wiki/Chinon_nuclear_power_plant	L500133	G500539	FR0010242511	1	4606		59	2005	2045	2085
nuclear	France	Europe	Western Europe	Chinon nuclear power plant	A-3			480	retired	1966	1990	gas-cooled reactor						Electricité De France (EDF)		47.2254	0.1656	exact		Indre-et-Loire		Centre-Val de Loire	https://gem.wiki/Chinon_nuclear_power_plant	L500133	G500503	FR0010242511	1	4606		58	2006	2046	2086
nuclear	France	Europe	Western Europe	Chinon nuclear power plant	B-1			954	operating	1984		pressurized water reactor						Electricité De France (EDF)		47.2254	0.1656	exact		Indre-et-Loire		Centre-Val de Loire	https://gem.wiki/Chinon_nuclear_power_plant	L500133	G500289	FR0010242511	1	4606		40	2024	2064	2104
nuclear	France	Europe	Western Europe	Chinon nuclear power plant	B-2			954	operating	1984		pressurized water reactor						Electricité De France (EDF)		47.2254	0.1656	exact		Indre-et-Loire		Centre-Val de Loire	https://gem.wiki/Chinon_nuclear_power_plant	L500133	G500290	FR0010242511	1	4606		40	2024	2064	2104
nuclear	France	Europe	Western Europe	Chinon nuclear power plant	B-3			954	operating	1987		pressurized water reactor						Electricité De France (EDF)		47.2254	0.1656	exact		Indre-et-Loire		Centre-Val de Loire	https://gem.wiki/Chinon_nuclear_power_plant	L500133	G500291	FR0010242511	1	4606		37	2027	2067	2107
nuclear	France	Europe	Western Europe	Chinon nuclear power plant	B-4			954	operating	1988		pressurized water reactor						Electricité De France (EDF)		47.2254	0.1656	exact		Indre-et-Loire		Centre-Val de Loire	https://gem.wiki/Chinon_nuclear_power_plant	L500133	G500292	FR0010242511	1	4606	4606	36	2028	2068	2108
nuclear	France	Europe	Western Europe	Chooz nuclear power plant	A		Ardennes	320	retired	1967	1991	pressurized water reactor						Electricité De France (EDF)		50.0901	4.7872	exact		Ardennes		Grand Est	https://gem.wiki/Chooz_nuclear_power_plant	L500007	G500509	FR0010242511	1	3440		57	2007	2047	2087
nuclear	France	Europe	Western Europe	Chooz nuclear power plant	B-1			1560	operating	2000		pressurized water reactor						Electricité De France (EDF)		50.0901	4.7872	exact		Ardennes		Grand Est	https://gem.wiki/Chooz_nuclear_power_plant	L500007	G500010	FR0010242511	1	3440		24	2040	2080	2120
nuclear	France	Europe	Western Europe	Chooz nuclear power plant	B-2			1560	operating	2000		pressurized water reactor						Electricité De France (EDF)		50.0901	4.7872	exact		Ardennes		Grand Est	https://gem.wiki/Chooz_nuclear_power_plant	L500007	G500011	FR0010242511	1	3440	3440	24	2040	2080	2120
nuclear	France	Europe	Western Europe	Civaux nuclear power plant	1			1561	operating	2002		pressurized water reactor						Electricité De France (EDF)		46.4555	0.6582	exact		Vienne		Nouvelle-Aquitaine	https://gem.wiki/Civaux_nuclear_power_plant	L500006	G500008	FR0010242511	1	3122		22	2042	2082	2122
nuclear	France	Europe	Western Europe	Civaux nuclear power plant	2			1561	operating	2002		pressurized water reactor						Electricité De France (EDF)		46.4555	0.6582	exact		Vienne		Nouvelle-Aquitaine	https://gem.wiki/Civaux_nuclear_power_plant	L500006	G500009	FR0010242511	1	3122	3122	22	2042	2082	2122
nuclear	France	Europe	Western Europe	Cruas nuclear power plant	1			956	operating	1984		pressurized water reactor						Electricité De France (EDF)		44.6325	4.7546	exact		Ardèche		Auvergne-Rhône-Alpes	https://gem.wiki/Cruas_nuclear_power_plant	L500130	G500279	FR0010242511	1	2868		40	2024	2064	2104
nuclear	France	Europe	Western Europe	Cruas nuclear power plant	3			956	operating	1984		pressurized water reactor						Electricité De France (EDF)		44.6325	4.7546	exact		Ardèche		Auvergne-Rhône-Alpes	https://gem.wiki/Cruas_nuclear_power_plant	L500130	G500281	FR0010242511	1	2868		40	2024	2064	2104
nuclear	France	Europe	Western Europe	Cruas nuclear power plant	4			956	operating	1985		pressurized water reactor						Electricité De France (EDF)		44.6325	4.7546	exact		Ardèche		Auvergne-Rhône-Alpes	https://gem.wiki/Cruas_nuclear_power_plant	L500130	G500282	FR0010242511	1	2868	2868	39	2025	2065	2105
nuclear	France	Europe	Western Europe	Dampierre nuclear power plant	1			937	operating	1980		pressurized water reactor						Electricité De France (EDF)		47.7321	2.5185	exact		Loiret		Centre-Val de Loire	https://gem.wiki/Dampierre_nuclear_power_plant	L500137	G500305	FR0010242511	1	3748		44	2020	2060	2100
nuclear	France	Europe	Western Europe	Dampierre nuclear power plant	2			937	operating	1981		pressurized water reactor						Electricité De France (EDF)		47.7321	2.5185	exact		Loiret		Centre-Val de Loire	https://gem.wiki/Dampierre_nuclear_power_plant	L500137	G500306	FR0010242511	1	3748		43	2021	2061	2101
nuclear	France	Europe	Western Europe	Dampierre nuclear power plant	3			937	operating	1981		pressurized water reactor						Electricité De France (EDF)		47.7321	2.5185	exact		Loiret		Centre-Val de Loire	https://gem.wiki/Dampierre_nuclear_power_plant	L500137	G500307	FR0010242511	1	3748		43	2021	2061	2101
nuclear	France	Europe	Western Europe	Dampierre nuclear power plant	4			937	operating	1981		pressurized water reactor						Electricité De France (EDF)		47.7321	2.5185	exact		Loiret		Centre-Val de Loire	https://gem.wiki/Dampierre_nuclear_power_plant	L500137	G500308	FR0010242511	1	3748	3748	43	2021	2061	2101
nuclear	United Kingdom	Europe	Northern Europe	Dungeness nuclear power plant	B1			615	retired	1985	2021	gas-cooled reactor						EDF Energy		50.9138	0.9597	exact	Folkestone and Hythe District	Kent		England	https://gem.wiki/Dungeness_nuclear_power_plant	L500372	G501023	FR0010242511	1	1230		39	2025	2065	2105
nuclear	United Kingdom	Europe	Northern Europe	Dungeness nuclear power plant	B2			615	retired	1989	2021	gas-cooled reactor						EDF Energy		50.9138	0.9597	exact	Folkestone and Hythe District	Kent		England	https://gem.wiki/Dungeness_nuclear_power_plant	L500372	G501024	FR0010242511	1	1230	1230	35	2029	2069	2109
nuclear	France	Europe	Western Europe	Fessenheim nuclear power plant	1			920	retired	1978	2020	pressurized water reactor						Electricité De France (EDF)		47.9032	7.5609	exact		Haut-Rhin		Grand Est	https://gem.wiki/Fessenheim_nuclear_power_plant	L500129	G500277	FR0010242511	1	1840		46	2018	2058	2098
nuclear	France	Europe	Western Europe	Fessenheim nuclear power plant	2			920	retired	1978	2020	pressurized water reactor						Electricité De France (EDF)		47.9032	7.5609	exact		Haut-Rhin		Grand Est	https://gem.wiki/Fessenheim_nuclear_power_plant	L500129	G500278	FR0010242511	1	1840	1840	46	2018	2058	2098
nuclear	France	Europe	Western Europe	Flamanville nuclear power plant	1			1382	operating	1986		pressurized water reactor						Electricité De France (EDF)		49.5366	-1.8823	exact		Manche		Normandy	https://gem.wiki/Flamanville_nuclear_power_plant	L500005	G500050	FR0010242511	1	4414		38	2026	2066	2106
nuclear	France	Europe	Western Europe	Flamanville nuclear power plant	2			1382	operating	1987		pressurized water reactor						Electricité De France (EDF)		49.5366	-1.8823	exact		Manche		Normandy	https://gem.wiki/Flamanville_nuclear_power_plant	L500005	G500051	FR0010242511	1	4414		37	2027	2067	2107
nuclear	France	Europe	Western Europe	Flamanville nuclear power plant	3			1650	construction			pressurized water reactor						Electricité De France (EDF)		49.5366	-1.8823	exact		Manche		Normandy	https://gem.wiki/Flamanville_nuclear_power_plant	L500005	G500007	FR0010242511	1	4414	4414	-99	40	80	120
nuclear	France	Europe	Western Europe	Golfech nuclear power plant	1			1363	operating	1991		pressurized water reactor						Electricité De France (EDF)		44.106	0.8443	exact		Tarn-et-Garonne		Occitania	https://gem.wiki/Golfech_nuclear_power_plant	L500036	G500062	FR0010242511	1	2726		33	2031	2071	2111
nuclear	France	Europe	Western Europe	Golfech nuclear power plant	2			1363	operating	1994		pressurized water reactor						Electricité De France (EDF)		44.106	0.8443	exact		Tarn-et-Garonne		Occitania	https://gem.wiki/Golfech_nuclear_power_plant	L500036	G500063	FR0010242511	1	2726	2726	30	2034	2074	2114
nuclear	France	Europe	Western Europe	Gravelines nuclear power plant	1			951	operating	1980		pressurized water reactor						Electricité De France (EDF)		51.0141	2.1332	exact		Nord		Hauts-de-France	https://gem.wiki/Gravelines_nuclear_power_plant	L500135	G500297	FR0010242511	1	9006		44	2020	2060	2100
nuclear	France	Europe	Western Europe	Gravelines nuclear power plant	2			951	operating	1980		pressurized water reactor						Electricité De France (EDF)		51.0141	2.1332	exact		Nord		Hauts-de-France	https://gem.wiki/Gravelines_nuclear_power_plant	L500135	G500298	FR0010242511	1	9006		44	2020	2060	2100
nuclear	France	Europe	Western Europe	Gravelines nuclear power plant	3			951	operating	1981		pressurized water reactor						Electricité De France (EDF)		51.0141	2.1332	exact		Nord		Hauts-de-France	https://gem.wiki/Gravelines_nuclear_power_plant	L500135	G500299	FR0010242511	1	9006		43	2021	2061	2101
nuclear	France	Europe	Western Europe	Gravelines nuclear power plant	4			951	operating	1981		pressurized water reactor						Electricité De France (EDF)		51.0141	2.1332	exact		Nord		Hauts-de-France	https://gem.wiki/Gravelines_nuclear_power_plant	L500135	G500300	FR0010242511	1	9006		43	2021	2061	2101
nuclear	France	Europe	Western Europe	Gravelines nuclear power plant	5			951	operating	1985		pressurized water reactor						Electricité De France (EDF)		51.0141	2.1332	exact		Nord		Hauts-de-France	https://gem.wiki/Gravelines_nuclear_power_plant	L500135	G500301	FR0010242511	1	9006		39	2025	2065	2105
nuclear	France	Europe	Western Europe	Gravelines nuclear power plant	6			951	operating	1985		pressurized water reactor						Electricité De France (EDF)		51.0141	2.1332	exact		Nord		Hauts-de-France	https://gem.wiki/Gravelines_nuclear_power_plant	L500135	G500302	FR0010242511	1	9006		39	2025	2065	2105
nuclear	France	Europe	Western Europe	Gravelines nuclear power plant	7			1650	announced			pressurized water reactor						Electricité De France (EDF)		51.0141	2.1332	exact		Nord		Hauts-de-France	https://gem.wiki/Gravelines_nuclear_power_plant	L500135	G501178	FR0010242511	1	9006		-99	40	80	120
nuclear	France	Europe	Western Europe	Gravelines nuclear power plant	8			1650	announced			pressurized water reactor						Electricité De France (EDF)		51.0141	2.1332	exact		Nord		Hauts-de-France	https://gem.wiki/Gravelines_nuclear_power_plant	L500135	G501179	FR0010242511	1	9006	9006	-99	40	80	120
nuclear	United Kingdom	Europe	Northern Europe	Hartlepool nuclear power plant	A1			655	operating	1989		gas-cooled reactor						EDF Energy		54.6341	-1.1801	exact		Hartlepool	Tees Valley	England	https://gem.wiki/Hartlepool_nuclear_power_plant	L500373	G501025	FR0010242511	1	1310		35	2029	2069	2109
nuclear	United Kingdom	Europe	Northern Europe	Hartlepool nuclear power plant	A2			655	operating	1989		gas-cooled reactor						EDF Energy		54.6341	-1.1801	exact		Hartlepool	Tees Valley	England	https://gem.wiki/Hartlepool_nuclear_power_plant	L500373	G501026	FR0010242511	1	1310	1310	35	2029	2069	2109
nuclear	United Kingdom	Europe	Northern Europe	Heysham nuclear power plant	A1			625	operating	1989		gas-cooled reactor						EDF Energy		54.0295	-2.9149	exact	Lancaster	Lancashire		England	https://gem.wiki/Heysham_nuclear_power_plant	L500374	G501027	FR0010242511	1	2610		35	2029	2069	2109
nuclear	United Kingdom	Europe	Northern Europe	Heysham nuclear power plant	A2			625	operating	1989		gas-cooled reactor						EDF Energy		54.0295	-2.9149	exact	Lancaster	Lancashire		England	https://gem.wiki/Heysham_nuclear_power_plant	L500374	G501028	FR0010242511	1	2610		35	2029	2069	2109
nuclear	United Kingdom	Europe	Northern Europe	Heysham nuclear power plant	B1			680	operating	1989		gas-cooled reactor						EDF Energy		54.031	-2.9112	exact	Lancaster	Lancashire		England	https://gem.wiki/Heysham_nuclear_power_plant	L500374	G501029	FR0010242511	1	2610		35	2029	2069	2109
nuclear	United Kingdom	Europe	Northern Europe	Heysham nuclear power plant	B2			680	operating	1989		gas-cooled reactor						EDF Energy		54.031	-2.9112	exact	Lancaster	Lancashire		England	https://gem.wiki/Heysham_nuclear_power_plant	L500374	G501030	FR0010242511	1	2610	2610	35	2029	2069	2109
nuclear	United Kingdom	Europe	Northern Europe	Hinkley Point nuclear power plant	B2			655	retired	1976	2022	gas-cooled reactor						EDF Energy		51.2085	-3.1334	exact	Somerset West and Taunton	Somerset		England	https://gem.wiki/Hinkley_Point_nuclear_power_plant	L500375	G501034	FR0010242511	1	4750		48	2016	2056	2096
nuclear	United Kingdom	Europe	Northern Europe	Hinkley Point nuclear power plant	B1			655	retired	1978	2022	gas-cooled reactor						EDF Energy		51.2085	-3.1334	exact	Somerset West and Taunton	Somerset		England	https://gem.wiki/Hinkley_Point_nuclear_power_plant	L500375	G501033	FR0010242511	1	4750		46	2018	2058	2098
nuclear	United Kingdom	Europe	Northern Europe	Hinkley Point nuclear power plant	C1			1720	construction			pressurized water reactor						EDF Energy; China General Nuclear		51.2063	-3.1423	exact	Somerset West and Taunton	Somerset		England	https://gem.wiki/Hinkley_Point_nuclear_power_plant	L500375	G501035	FR0010242511	0.5	4750		-99	40	80	120
nuclear	United Kingdom	Europe	Northern Europe	Hinkley Point nuclear power plant	C2			1720	construction			pressurized water reactor						EDF Energy; China General Nuclear		51.2063	-3.1423	exact	Somerset West and Taunton	Somerset		England	https://gem.wiki/Hinkley_Point_nuclear_power_plant	L500375	G501036	FR0010242511	0.5	4750	4750	-99	40	80	120
nuclear	United Kingdom	Europe	Northern Europe	Hunterston nuclear power plant	B1			644	retired	1976	2021	gas-cooled reactor						EDF Energy		55.7229	-4.8913	exact		North Ayrshire		Scotland	https://gem.wiki/Hunterston_nuclear_power_plant	L500376	G501039	FR0010242511	1	1288		48	2016	2056	2096
nuclear	United Kingdom	Europe	Northern Europe	Hunterston nuclear power plant	B2			644	retired	1977	2022	gas-cooled reactor						EDF Energy		55.7229	-4.8913	exact		North Ayrshire		Scotland	https://gem.wiki/Hunterston_nuclear_power_plant	L500376	G501040	FR0010242511	1	1288	1288	47	2017	2057	2097
nuclear	France	Europe	Western Europe	Le Carnet nuclear power plant	1		Le Pellerin	1500	cancelled			pressurized water reactor						Electricité De France (EDF)		47.2809	-1.8786	exact		Loire-Atlantique		Pays de la Loire	https://gem.wiki/Le_Carnet_nuclear_power_plant	L500413	G501180	FR0010242511	1	6000		-99	40	80	120
nuclear	France	Europe	Western Europe	Le Carnet nuclear power plant	2		Le Pellerin	1500	cancelled			pressurized water reactor						Electricité De France (EDF)		47.2809	-1.8786	exact		Loire-Atlantique		Pays de la Loire	https://gem.wiki/Le_Carnet_nuclear_power_plant	L500413	G501181	FR0010242511	1	6000		-99	40	80	120
nuclear	France	Europe	Western Europe	Le Carnet nuclear power plant	3		Le Pellerin	1500	cancelled			pressurized water reactor						Electricité De France (EDF)		47.2809	-1.8786	exact		Loire-Atlantique		Pays de la Loire	https://gem.wiki/Le_Carnet_nuclear_power_plant	L500413	G501182	FR0010242511	1	6000		-99	40	80	120
nuclear	France	Europe	Western Europe	Le Carnet nuclear power plant	4		Le Pellerin	1500	cancelled			pressurized water reactor						Electricité De France (EDF)		47.2809	-1.8786	exact		Loire-Atlantique		Pays de la Loire	https://gem.wiki/Le_Carnet_nuclear_power_plant	L500413	G501183	FR0010242511	1	6000	6000	-99	40	80	120
nuclear	France	Europe	Western Europe	Marcoule nuclear power plant	G2			43	retired	1959	1980	gas-cooled reactor						Commissariat À L'Energie Atomique [80%]; Electricité De France (EDF) [20%]		44.1433	4.7094	exact		Gard		Occitania	https://gem.wiki/Marcoule_nuclear_power_plant	L500241	G500582	FR0010242511	0.2	43	43	65	1999	2039	2079
nuclear	United States	Americas	Northern America	Nine Mile Point nuclear power plant	1			642	operating	1969		boiling water reactor						Exelon Nuclear; Electricité De France (EDF)		43.5205	-76.4068	exact		Oswego County		New York	https://gem.wiki/Nine_Mile_Point_nuclear_power_plant	L500009	G500403	FR0010242511	0.5	1962		55	2009	2049	2089
nuclear	United States	Americas	Northern America	Nine Mile Point nuclear power plant	2			1320	operating	1988		boiling water reactor						Exelon Nuclear; Electricité De France (EDF)		43.5205	-76.4068	exact		Oswego County		New York	https://gem.wiki/Nine_Mile_Point_nuclear_power_plant	L500009	G500015	FR0010242511	0.5	1962	1962	36	2028	2068	2108
nuclear	France	Europe	Western Europe	Nogent nuclear power plant	1			1363	operating	1988		pressurized water reactor						Electricité De France (EDF)		48.5171	3.5181	exact		Aube		Grand Est	https://gem.wiki/Nogent_nuclear_power_plant	L500037	G500064	FR0010242511	1	2726		36	2028	2068	2108
nuclear	France	Europe	Western Europe	Nogent nuclear power plant	2			1363	operating	1989		pressurized water reactor						Electricité De France (EDF)		48.5171	3.5181	exact		Aube		Grand Est	https://gem.wiki/Nogent_nuclear_power_plant	L500037	G500065	FR0010242511	1	2726	2726	35	2029	2069	2109
nuclear	France	Europe	Western Europe	Paluel nuclear power plant	1			1382	operating	1985		pressurized water reactor						Electricité De France (EDF)		49.8582	0.6354	exact		Seine-Maritime		Normandy	https://gem.wiki/Paluel_nuclear_power_plant	L500032	G500052	FR0010242511	1	5528		39	2025	2065	2105
nuclear	France	Europe	Western Europe	Paluel nuclear power plant	2			1382	operating	1985		pressurized water reactor						Electricité De France (EDF)		49.8582	0.6354	exact		Seine-Maritime		Normandy	https://gem.wiki/Paluel_nuclear_power_plant	L500032	G500053	FR0010242511	1	5528		39	2025	2065	2105
nuclear	France	Europe	Western Europe	Paluel nuclear power plant	3			1382	operating	1986		pressurized water reactor						Electricité De France (EDF)		49.8582	0.6354	exact		Seine-Maritime		Normandy	https://gem.wiki/Paluel_nuclear_power_plant	L500032	G500054	FR0010242511	1	5528		38	2026	2066	2106
nuclear	France	Europe	Western Europe	Paluel nuclear power plant	4			1382	operating	1986		pressurized water reactor						Electricité De France (EDF)		49.8582	0.6354	exact		Seine-Maritime		Normandy	https://gem.wiki/Paluel_nuclear_power_plant	L500032	G500055	FR0010242511	1	5528	5528	38	2026	2066	2106
nuclear	France	Europe	Western Europe	Penly nuclear power plant	1			1382	operating	1990		pressurized water reactor						Electricité De France (EDF)		49.9764	1.2107	exact	Petit-Caux	Seine-Maritime		Normandy	https://gem.wiki/Penly_nuclear_power_plant	L500033	G500056	FR0010242511	1	6064		34	2030	2070	2110
nuclear	France	Europe	Western Europe	Penly nuclear power plant	2			1382	operating	1992		pressurized water reactor						Electricité De France (EDF)		49.9764	1.2107	exact	Petit-Caux	Seine-Maritime		Normandy	https://gem.wiki/Penly_nuclear_power_plant	L500033	G500057	FR0010242511	1	6064		32	2032	2072	2112
nuclear	France	Europe	Western Europe	Penly nuclear power plant	3			1650	pre-construction			pressurized water reactor						Electricité De France (EDF)		49.9764	1.2107	exact	Petit-Caux	Seine-Maritime		Normandy	https://gem.wiki/Penly_nuclear_power_plant	L500033	G501185	FR0010242511	1	6064		-99	40	80	120
nuclear	France	Europe	Western Europe	Penly nuclear power plant	4			1650	pre-construction			pressurized water reactor						Electricité De France (EDF)		49.9764	1.2107	exact	Petit-Caux	Seine-Maritime		Normandy	https://gem.wiki/Penly_nuclear_power_plant	L500033	G501186	FR0010242511	1	6064	6064	-99	40	80	120
nuclear	France	Europe	Western Europe	Saint-Laurent nuclear power plant	A-1		Saint-Laurent A	500	retired	1969	1990	gas-cooled reactor						Electricité De France (EDF)		47.7197	1.5783	exact		Loir-et-Cher		Centre-Val de Loire	https://gem.wiki/Saint-Laurent_nuclear_power_plant	L500131	G500431	FR0010242511	1	2942		55	2009	2049	2089
nuclear	France	Europe	Western Europe	Saint-Laurent nuclear power plant	A-2		Saint-Laurent A	530	retired	1971	1992	gas-cooled reactor						Electricité De France (EDF)		47.7197	1.5783	exact		Loir-et-Cher		Centre-Val de Loire	https://gem.wiki/Saint-Laurent_nuclear_power_plant	L500131	G500458	FR0010242511	1	2942		53	2011	2051	2091
nuclear	France	Europe	Western Europe	Saint-Laurent nuclear power plant	B-1		Saint-Laurent B	956	operating	1983		pressurized water reactor						Electricité De France (EDF)		47.7197	1.5783	exact		Loir-et-Cher		Centre-Val de Loire	https://gem.wiki/Saint-Laurent_nuclear_power_plant	L500131	G500283	FR0010242511	1	2942		41	2023	2063	2103
nuclear	France	Europe	Western Europe	Saint-Laurent nuclear power plant	B-2		Saint-Laurent B	956	operating	1983		pressurized water reactor						Electricité De France (EDF)		47.7197	1.5783	exact		Loir-et-Cher		Centre-Val de Loire	https://gem.wiki/Saint-Laurent_nuclear_power_plant	L500131	G500284	FR0010242511	1	2942	2942	41	2023	2063	2103
nuclear	United Kingdom	Europe	Northern Europe	Sizewell C nuclear power plant	1			1600	pre-construction			pressurized water reactor						EDF Energy [50%]; UK government [50%]		52.2199	1.6203	exact	East Suffolk	Suffolk		England	https://gem.wiki/Sizewell_C_nuclear_power_plant	L500293	G500708	FR0010242511	0.5	3200		-99	40	80	120
nuclear	United Kingdom	Europe	Northern Europe	Sizewell C nuclear power plant	2			1600	pre-construction			pressurized water reactor						EDF Energy [50%]; UK government [50%]		52.2199	1.6203	exact	East Suffolk	Suffolk		England	https://gem.wiki/Sizewell_C_nuclear_power_plant	L500293	G500709	FR0010242511	0.5	3200	3200	-99	40	80	120
nuclear	United Kingdom	Europe	Northern Europe	Sizewell nuclear power plant	B			1250	operating	1995		pressurized water reactor						EDF Energy		52.2145	1.6206	exact	East Suffolk	Suffolk		England	https://gem.wiki/Sizewell_nuclear_power_plant	L500378	G501045	FR0010242511	1	1250	1250	29	2035	2075	2115
nuclear	France	Europe	Western Europe	St. Alban nuclear power plant	1		Saint-Alban	1381	operating	1986		pressurized water reactor						Electricité De France (EDF)		45.4043	4.7554	exact		Isère		Auvergne-Rhône-Alpes	https://gem.wiki/St._Alban_nuclear_power_plant	L500034	G500058	FR0010242511	1	2762		38	2026	2066	2106
nuclear	France	Europe	Western Europe	St. Alban nuclear power plant	2		Saint-Alban	1381	operating	1987		pressurized water reactor						Electricité De France (EDF)		45.4043	4.7554	exact		Isère		Auvergne-Rhône-Alpes	https://gem.wiki/St._Alban_nuclear_power_plant	L500034	G500059	FR0010242511	1	2762	2762	37	2027	2067	2107
nuclear	France	Europe	Western Europe	Superphénix nuclear power plant			SPX	1242	retired	1986	1998	fast breeder reactor						Electricité De France (EDF)		45.7613	5.4701	exact	Creys-Mépieu	Isère		Auvergne-Rhône-Alpes	https://gem.wiki/Superphénix_nuclear_power_plant	L500107	G500204	FR0010242511	1	1242	1242	38	2026	2066	2106
nuclear	China	Asia	Eastern Asia	Taishan nuclear power plant	1-1	台山核电站		1750	operating	2018		pressurized water reactor						Taishan Nuclear Power Industry Investment CO LTD [47.5%]; EDF International [25%]; China General Nuclear Power CO LTD [12.5%]; Guangdong Nuclear Power Investment CO LTD [10%]; EDF (China) Investment LTD [5%]		21.861	112.925	exact	Chixi Town	Taishan	Jiangmen	Guangdong	https://gem.wiki/Taishan_nuclear_power_plant	L500298	G500726	FR0010242511	0.25	5800		6	2058	2098	2138
nuclear	China	Asia	Eastern Asia	Taishan nuclear power plant	1-2	台山核电站		1750	operating	2019		pressurized water reactor						Taishan Nuclear Power Industry Investment CO LTD [47.5%]; EDF International [25%]; China General Nuclear Power CO LTD [12.5%]; Guangdong Nuclear Power Investment CO LTD [10%]; EDF (China) Investment LTD [5%]		21.861	112.925	exact	Chixi Town	Taishan	Jiangmen	Guangdong	https://gem.wiki/Taishan_nuclear_power_plant	L500298	G500725	FR0010242511	0.25	5800		5	2059	2099	2139
nuclear	China	Asia	Eastern Asia	Taishan nuclear power plant	2-3	台山核电站		1150	announced			pressurized water reactor						Taishan Nuclear Power Industry Investment CO LTD [47.5%]; EDF International [25%]; China General Nuclear Power CO LTD [12.5%]; Guangdong Nuclear Power Investment CO LTD [10%]; EDF (China) Investment LTD [5%]		21.861	112.925	approximate	Chixi Town	Taishan	Jiangmen	Guangdong	https://gem.wiki/Taishan_nuclear_power_plant	L500298	G501118	FR0010242511	0.25	5800		-99	40	80	120
nuclear	China	Asia	Eastern Asia	Taishan nuclear power plant	2-4	台山核电站		1150	announced			pressurized water reactor						Taishan Nuclear Power Industry Investment CO LTD [47.5%]; EDF International [25%]; China General Nuclear Power CO LTD [12.5%]; Guangdong Nuclear Power Investment CO LTD [10%]; EDF (China) Investment LTD [5%]		21.861	112.925	approximate	Chixi Town	Taishan	Jiangmen	Guangdong	https://gem.wiki/Taishan_nuclear_power_plant	L500298	G501119	FR0010242511	0.25	5800	5800	-99	40	80	120
nuclear	United Kingdom	Europe	Northern Europe	Torness nuclear power plant	1			682	operating	1988		gas-cooled reactor						EDF Energy		55.9679	-2.4086	exact		East Lothian		Scotland	https://gem.wiki/Torness_nuclear_power_plant	L500188	G500434	FR0010242511	1	1364		36	2028	2068	2108
nuclear	United Kingdom	Europe	Northern Europe	Torness nuclear power plant	2			682	operating	1989		gas-cooled reactor						EDF Energy		55.9679	-2.4086	exact		East Lothian		Scotland	https://gem.wiki/Torness_nuclear_power_plant	L500188	G500435	FR0010242511	1	1364	1364	35	2029	2069	2109
nuclear	France	Europe	Western Europe	Tricastin nuclear power plant	1			955	operating	1980		pressurized water reactor						Electricité De France (EDF)		44.3311	4.7311	exact		Drôme		Auvergne-Rhône-Alpes	https://gem.wiki/Tricastin_nuclear_power_plant	L500132	G500285	FR0010242511	1	3820		44	2020	2060	2100
nuclear	France	Europe	Western Europe	Tricastin nuclear power plant	2			955	operating	1980		pressurized water reactor						Electricité De France (EDF)		44.3311	4.7311	exact		Drôme		Auvergne-Rhône-Alpes	https://gem.wiki/Tricastin_nuclear_power_plant	L500132	G500286	FR0010242511	1	3820		44	2020	2060	2100
nuclear	France	Europe	Western Europe	Tricastin nuclear power plant	3			955	operating	1981		pressurized water reactor						Electricité De France (EDF)		44.3311	4.7311	exact		Drôme		Auvergne-Rhône-Alpes	https://gem.wiki/Tricastin_nuclear_power_plant	L500132	G500287	FR0010242511	1	3820		43	2021	2061	2101
nuclear	France	Europe	Western Europe	Tricastin nuclear power plant	4			955	operating	1981		pressurized water reactor						Electricité De France (EDF)		44.3311	4.7311	exact		Drôme		Auvergne-Rhône-Alpes	https://gem.wiki/Tricastin_nuclear_power_plant	L500132	G500288	FR0010242511	1	3820	3820	43	2021	2061	2101
oil/gas	France	Europe	Western Europe	Amfard power station	14		Total Gonfreville	120	operating	2004		CC	NG					EDF [50.0%]; Texaco [25.0%]; TotalEnergies SE [25.0%]	Chevron Corp [25.0%]; TotalEnergies SE [25.0%]	49.48	0.22	exact	Gonfreville-l'Orcher			Seine-Maritime	https://www.gem.wiki/Amfard_power_station	L100000400088	G100000400088	FR0010242511	0.5	240		20	2044	2084	2124
oil/gas	France	Europe	Western Europe	Amfard power station	15		Total Gonfreville	120	operating	2004		CC	NG					EDF [50.0%]; Texaco [25.0%]; TotalEnergies SE [25.0%]	Chevron Corp [25.0%]; TotalEnergies SE [25.0%]	49.48	0.22	exact	Gonfreville-l'Orcher			Seine-Maritime	https://www.gem.wiki/Amfard_power_station	L100000400088	G100000400089	FR0010242511	0.5	240	240	20	2044	2084	2124
oil/gas	Belgium	Europe	Western Europe	Angleur power station	31			25	operating	1978		GT	NG/FO					Luminus NV/SA [100%]	EDF Belgium SA [68.6%]; Pubilec CVBA/SCRL [26.4%]	50.6177	5.5837	exact	Angleur			Liege	https://www.gem.wiki/Angleur_power_station	L100000400018	G100000400018	FR0010242511	0.686	178		46	2018	2058	2098
oil/gas	Belgium	Europe	Western Europe	Angleur power station	32			25	operating	1978		GT	NG					Luminus NV/SA [100%]	EDF Belgium SA [68.6%]; Pubilec CVBA/SCRL [26.4%]	50.6177	5.5837	exact	Angleur			Liege	https://www.gem.wiki/Angleur_power_station	L100000400018	G100000400019	FR0010242511	0.686	178		46	2018	2058	2098
oil/gas	Belgium	Europe	Western Europe	Angleur power station	41			64	operating	2008		GT	NG					Luminus NV/SA [100%]	EDF Belgium SA [68.6%]; Pubilec CVBA/SCRL [26.4%]	50.6177	5.5837	exact	Angleur			Liege	https://www.gem.wiki/Angleur_power_station	L100000400018	G100000400020	FR0010242511	0.686	178		16	2048	2088	2128
oil/gas	Belgium	Europe	Western Europe	Angleur power station	42			64	operating	2008		GT	NG					Luminus NV/SA [100%]	EDF Belgium SA [68.6%]; Pubilec CVBA/SCRL [26.4%]	50.6177	5.5837	exact	Angleur			Liege	https://www.gem.wiki/Angleur_power_station	L100000400018	G100000400021	FR0010242511	0.686	178	178	16	2048	2088	2128
oil/gas	France	Europe	Western Europe	Bassens power station	1			42	operating	1998		GT	NG					COGETHERM [100.0%]	Electricité de France SA [100.0%]	44.9165	-0.526851	exact	Bassens			Nouvelle-Aquitaine	https://www.gem.wiki/Bassens_power_station	L100000407672	G100000410025	FR0010242511	1	42	42	26	2038	2078	2118
oil/gas	Martinique	Americas	Latin America and the Caribbean	Bellefontaine power station	IC1-12			219.6	operating	2014		IC	HFO/D					Electricité de France SA [100%]	Electricité de France SA [100.0%]	14.6695	-61.1546	exact	Bellefontaine			Martinique	https://gem.wiki/Bellefontaine_power_station	L100000408645	G100000412007	FR0010242511	1	219.6	219.6	10	2054	2094	2134
oil/gas	France	Europe	Western Europe	Blénod power station	5			427	operating	2011		CC	NG					EDF [100.0%]	EDF [100.0%]	48.869	6.08415	exact	Blenod-les-Pont-a-Mousson/Meurthe-et-Moselle			Meurthe-et-Moselle	https://www.gem.wiki/Bl%C3%A9nod_power_station	L100000101857	G100000400091	FR0010242511	1	1427	1427	13	2051	2091	2131
oil/gas	France	Europe	Western Europe	Bouchain power station	7			585	operating	2016		CC	NG					EDF [100.0%]	EDF [100.0%]	50.2987	3.3156	exact	Bouchain			Nord	https://www.gem.wiki/Bouchain_power_station	L100000101860	G100000400092	FR0010242511	1	835	835	8	2056	2096	2136
oil/gas	France	Europe	Western Europe	Brennilis power station	GT1			92	operating	1980		GT	HFO					EDF [100.0%]	EDF [100.0%]	48.357	-3.86916	exact	Brennilis			Brittany	https://www.gem.wiki/Brennilis_power_station	L100000408805	G100000412941	FR0010242511	1	324		44	2020	2060	2100
oil/gas	France	Europe	Western Europe	Brennilis power station	GT3			140	operating	1981		GT	HFO					EDF [100.0%]	EDF [100.0%]	48.357	-3.86916	exact	Brennilis			Brittany	https://www.gem.wiki/Brennilis_power_station	L100000408805	G100000412939	FR0010242511	1	324		43	2021	2061	2101
oil/gas	France	Europe	Western Europe	Brennilis power station	GT2			92	operating	1997		GT	HFO					EDF [100.0%]	EDF [100.0%]	48.357	-3.86916	exact	Brennilis			Brittany	https://www.gem.wiki/Brennilis_power_station	L100000408805	G100000412940	FR0010242511	1	324	324	27	2037	2077	2117
oil/gas	French Guiana	Americas	Latin America and the Caribbean	Degrad-des-Cannes power station	IC			42.7	operating	1982	2026	IC	D/HFO					Electricité de France SA [100%]	Electricité de France SA [100.0%]	4.86293	-52.2754	exact	Remire-Montjoly			French Guiana	https://gem.wiki/Degrad-des-Cannes_power_station	L100000408638	G100000412031	FR0010242511	1	110.7		42	2022	2062	2102
oil/gas	French Guiana	Americas	Latin America and the Caribbean	Degrad-des-Cannes power station	GT1			20	operating	1991	2026	GT	D/HFO					Electricité de France SA [100%]	Electricité de France SA [100.0%]	4.86293	-52.2754	exact	Remire-Montjoly			French Guiana	https://gem.wiki/Degrad-des-Cannes_power_station	L100000408638	G100000412033	FR0010242511	1	110.7		33	2031	2071	2111
oil/gas	French Guiana	Americas	Latin America and the Caribbean	Degrad-des-Cannes power station	GT2			20	operating	2008	2026	GT	D/HFO					Electricité de France SA [100%]	Electricité de France SA [100.0%]	4.86293	-52.2754	exact	Remire-Montjoly			French Guiana	https://gem.wiki/Degrad-des-Cannes_power_station	L100000408638	G100000412032	FR0010242511	1	110.7		16	2048	2088	2128
oil/gas	French Guiana	Americas	Latin America and the Caribbean	Degrad-des-Cannes power station	IC3			14	operating	2018	2026	IC	D/HFO					Electricité de France SA [100%]	Electricité de France SA [100.0%]	4.86293	-52.2754	exact	Remire-Montjoly			French Guiana	https://gem.wiki/Degrad-des-Cannes_power_station	L100000408638	G100000412030	FR0010242511	1	110.7		6	2058	2098	2138
oil/gas	French Guiana	Americas	Latin America and the Caribbean	Degrad-des-Cannes power station	IC4			14	operating	2020	2026	IC	D/HFO					Electricité de France SA [100%]	Electricité de France SA [100.0%]	4.86293	-52.2754	exact	Remire-Montjoly			French Guiana	https://gem.wiki/Degrad-des-Cannes_power_station	L100000408638	G100000412029	FR0010242511	1	110.7	110.7	4	2060	2100	2140
oil/gas	France	Europe	Western Europe	Dirinon power station	GT1			92	operating	1980		GT	HFO					EDF [100.0%]	EDF [100.0%]	48.3899	4.26233	exact	Dirinon			Brittany	https://www.gem.wiki/Dirinon_power_station	L100000408745	G100000412938	FR0010242511	1	184		44	2020	2060	2100
oil/gas	France	Europe	Western Europe	Dirinon power station	GT2			92	operating	1981		GT	HFO					EDF [100.0%]	EDF [100.0%]	48.3899	4.26233	exact	Dirinon			Brittany	https://www.gem.wiki/Dirinon_power_station	L100000408745	G100000412937	FR0010242511	1	184	184	43	2021	2061	2101
oil/gas	Germany	Europe	Western Europe	EDF Premnitz power station	CC			400	shelved			CC	NG					EDF Deutschland GmbH [100.0%]	EDF International SAS [100.0%]	52.5337	12.3487	approximate	Premintz			Brandenburg	https://www.gem.wiki/EDF_Premnitz_power_station	L100000401428	G100000400884	FR0010242511	1	400	400	-99	40	80	120
oil/gas	Chile	Americas	Latin America and the Caribbean	El Campesino power station	1	Central Termoeléctrica El Campesino		640	shelved			CC	LNG					Generadora Metropolitana SpA [100%]	Andes Mining & Energy SA [50.0%]; Electricité de France SA [50.0%]	-36.7943	-72.4203	approximate	Bulnes			Ñuble	https://gem.wiki/El_Campesino_power_station	L100000406554	G100000406731	FR0010242511	0.5	640	640	-99	40	80	120
oil/gas	France	Europe	Western Europe	Gennevilliers power station	1			203	operating	1994		GT	NG					EDF [100.0%]	EDF [100.0%]	48.937	2.26144	exact	Gennevilliers			Hauts-de-Siene	https://www.gem.wiki/Gennevilliers_power_station	L100000400101	G100000400101	FR0010242511	1	203	203	30	2034	2074	2114
oil/gas	Belgium	Europe	Western Europe	Ham (Gent) power station	1			43	operating	1993		CC	NG					Luminus NV/SA [100%]	EDF Belgium SA [68.6%]; Pubilec CVBA/SCRL [26.4%]	51.0596	3.7364	exact	Gent			East Flanders	https://www.gem.wiki/Ham_(Gent)_power_station	L100000400025	G100000406272	FR0010242511	0.686	159		31	2033	2073	2113
oil/gas	Belgium	Europe	Western Europe	Ham (Gent) power station	31			58	operating	2006		GT	NG					Luminus NV/SA [100%]	EDF Belgium SA [68.6%]; Pubilec CVBA/SCRL [26.4%]	51.0596	3.7364	exact	Gent			East Flanders	https://www.gem.wiki/Ham_(Gent)_power_station	L100000400025	G100000400025	FR0010242511	0.686	159		18	2046	2086	2126
oil/gas	Belgium	Europe	Western Europe	Ham (Gent) power station	32			58	operating	2006		GT	NG					Luminus NV/SA [100%]	EDF Belgium SA [68.6%]; Pubilec CVBA/SCRL [26.4%]	51.0596	3.7364	exact	Gent			East Flanders	https://www.gem.wiki/Ham_(Gent)_power_station	L100000400025	G100000400026	FR0010242511	0.686	159	159	18	2046	2086	2126
oil/gas	Belgium	Europe	Western Europe	Izegem power station	1			20	operating	1995		GT	NG					Luminus NV/SA [100%]	EDF Belgium SA [68.6%]; Pubilec CVBA/SCRL [26.4%]	50.9238	3.21298	exact	Izegem			West Flanders	https://www.gem.wiki/Izegem_power_station	L100000406372	G100000406280	FR0010242511	0.686	20	20	29	2035	2075	2115
oil/gas	Guadeloupe	Americas	Latin America and the Caribbean	Jarry Sud power station	TAC3			20	operating	1989	2025	GT	HFO					Electricité de France SA [100%]	Electricité de France SA [100.0%]	16.2331	-61.5554	exact	Baie-Mahault			Guadaloupe	https://gem.wiki/Jarry_Sud_power_station	L100000408660	G100000412026	FR0010242511	1	81		35	2029	2069	2109
oil/gas	Guadeloupe	Americas	Latin America and the Caribbean	Jarry Sud power station	TAC4			21	operating	1993	2028	GT	HFO					Electricité de France SA [100%]	Electricité de France SA [100.0%]	16.2331	-61.5554	exact	Baie-Mahault			Guadaloupe	https://gem.wiki/Jarry_Sud_power_station	L100000408660	G100000412025	FR0010242511	1	81		31	2033	2073	2113
oil/gas	Guadeloupe	Americas	Latin America and the Caribbean	Jarry Sud power station	TAC5			40	operating	2004		GT	HFO					Electricité de France SA [100%]	Electricité de France SA [100.0%]	16.2331	-61.5554	exact	Baie-Mahault			Guadaloupe	https://gem.wiki/Jarry_Sud_power_station	L100000408660	G100000412024	FR0010242511	1	81	81	20	2044	2084	2124
oil/gas	Belgium	Europe	Western Europe	Jemeppe-sur-Sambre power station	1		Jemeppe-Solvay	106	operating	2000		CC	NG					Luminus NV/SA [100%]	EDF Belgium SA [68.6%]; Pubilec CVBA/SCRL [26.4%]	50.4477	4.66122	exact	Jemeppe-sur-Sambre			Namur	https://www.gem.wiki/Jemeppe-sur-Sambre_power_station	L100000400029	G100000400029	FR0010242511	0.686	106	106	24	2040	2080	2120
oil/gas	French Guiana	Americas	Latin America and the Caribbean	Kourou power station	GT1			20	operating	1993	2025	GT	D/HFO					Electricité de France SA [100%]	Electricité de France SA [100.0%]	5.1628	-52.6701	exact	Kourou			French Guiana	https://gem.wiki/Kourou_power_station	L100000408893	G100000412028	FR0010242511	1	40		31	2033	2073	2113
oil/gas	French Guiana	Americas	Latin America and the Caribbean	Kourou power station	GT2			20	operating	2014	2025	GT	D/HFO					Electricité de France SA [100%]	Electricité de France SA [100.0%]	5.1628	-52.6701	exact	Kourou			French Guiana	https://gem.wiki/Kourou_power_station	L100000408893	G100000412027	FR0010242511	1	40	40	10	2054	2094	2134
oil/gas	France	Europe	Western Europe	Lavera power station	1			28	operating	2001		CC	NG					Air Liquide SA; COGETHERM	Air Liquide SA; Electricité de France SA	43.3912	4.99689	approximate	Lavera			Martigues	https://www.gem.wiki/Lavera_power_station	L100000406386	G100000406309	FR0010242511	0.5	28	28	23	2041	2081	2121
oil/gas	Réunion	Africa	Sub-Saharan Africa	Le Port Est power station	IC			219.6	operating	2014		ICCC	D					EDF [100.0%]	EDF [100.0%]	-20.9305	55.3268	exact	Port Réunion Est			Réunion	https://www.gem.wiki/Le_Port_Est_power_station	L100000408167	G100000411357	FR0010242511	1	219.6	219.6	10	2054	2094	2134
oil/gas	France	Europe	Western Europe	Lille power station	CHP			46	operating	2006		GT	NG					EDF [100.0%]	EDF [100.0%]	50.6243	3.0068	approximate	Lille			Hauts-de-France	https://www.gem.wiki/Lille_power_station	L100000407937	G100000410788	FR0010242511	1	46	46	18	2046	2086	2126
oil/gas	Chile	Americas	Latin America and the Caribbean	Los Vientos power station	1	Termoeléctrica Los Vientos		132	operating	2007		GT	D					Generadora Metropolitana SpA [100%]	Andes Mining & Energy SA [50.0%]; Electricité de France SA [50.0%]	-32.8435	-71.0123	exact	Llay-Llay			Valparaíso	https://gem.wiki/Los_Vientos_power_station	L100000408575	G100000412132	FR0010242511	0.5	132	132	17	2047	2087	2127
oil/gas	France	Europe	Western Europe	Lucciana power station	GT1			20	operating	1992		GT	HFO					EDF [100.0%]	EDF [100.0%]	42.5284	9.447	exact	Lucciana			Corsica	https://www.gem.wiki/Lucciana_power_station	L100000408774	G100000412926	FR0010242511	1	231		32	2032	2072	2112
oil/gas	France	Europe	Western Europe	Lucciana power station	GT2			20	operating	1992		GT	HFO					EDF [100.0%]	EDF [100.0%]	42.5284	9.447	exact	Lucciana			Corsica	https://www.gem.wiki/Lucciana_power_station	L100000408774	G100000412925	FR0010242511	1	231		32	2032	2072	2112
oil/gas	France	Europe	Western Europe	Lucciana power station	GT3			25	operating	1993		GT	HFO					EDF [100.0%]	EDF [100.0%]	42.5284	9.447	exact	Lucciana			Corsica	https://www.gem.wiki/Lucciana_power_station	L100000408774	G100000412924	FR0010242511	1	231		31	2033	2073	2113
oil/gas	France	Europe	Western Europe	Lucciana power station	GT4			40	operating	2008		GT	HFO					EDF [100.0%]	EDF [100.0%]	42.5284	9.447	exact	Lucciana			Corsica	https://www.gem.wiki/Lucciana_power_station	L100000408774	G100000412923	FR0010242511	1	231		16	2048	2088	2128
oil/gas	France	Europe	Western Europe	Lucciana power station	IC1-7			126	operating	2014		ICCC	D/NG					EDF [100.0%]	EDF [100.0%]	42.5284	9.447	exact	Lucciana			Corsica	https://www.gem.wiki/Lucciana_power_station	L100000408774	G100000412922	FR0010242511	1	231	231	10	2054	2094	2134
oil/gas	France	Europe	Western Europe	Martigues-Ponteau power station	5		La Centrale Thermique de Martigues	499	operating	2012		CC	NG					EDF [100.0%]	EDF [100.0%]	43.3582	5.02112	exact	Martigues			Bouches-du-Rhône	https://www.gem.wiki/Martigues-Ponteau_power_station	L100000400102	G100000400102	FR0010242511	1	998		12	2052	2092	2132
oil/gas	France	Europe	Western Europe	Martigues-Ponteau power station	6		La Centrale Thermique de Martigues	499	operating	2013		CC	NG					EDF [100.0%]	EDF [100.0%]	43.3582	5.02112	exact	Martigues			Bouches-du-Rhône	https://www.gem.wiki/Martigues-Ponteau_power_station	L100000400102	G100000400103	FR0010242511	1	998	998	11	2053	2093	2133
oil/gas	France	Europe	Western Europe	Montereau power station	5		Centrale Thermique de Montereau	200	operating	2010		GT	NG/FO					EDF [100.0%]	EDF [100.0%]	48.3803	2.85126	exact	Vernou-la-Celle-sur-Seine			Seine-et-Marne	https://www.gem.wiki/Montereau_power_station	L100000406384	G100000406305	FR0010242511	1	400		14	2050	2090	2130
oil/gas	France	Europe	Western Europe	Montereau power station	6		Centrale Thermique de Montereau	200	operating	2010		GT	NG/FO					EDF [100.0%]	EDF [100.0%]	48.3803	2.85126	exact	Vernou-la-Celle-sur-Seine			Seine-et-Marne	https://www.gem.wiki/Montereau_power_station	L100000406384	G100000406304	FR0010242511	1	400	400	14	2050	2090	2130
oil/gas	Brazil	Americas	Latin America and the Caribbean	Norte Fluminense 2 power station	1	Usina Termelétrica Norte Fluminense 2		1713	pre-construction	2025		CC	NG/LNG					EDF Norte Fluminense SA [100%]	Electricité de France SA [100.0%]	-22.3189	-41.8478	approximate	Macaé			Rio de Janeiro	https://gem.wiki/Norte_Fluminense_2_power_station	L100000406521	G100000406783	FR0010242511	1	1713	1713	-1	2065	2105	2145
oil/gas	Brazil	Americas	Latin America and the Caribbean	Norte Fluminense power station	1	Usina Termelétrica Norte Fluminense		827	operating	2004		CC	NG/LNG					Usina Terméletrica Norte Fluminense SA [100%]	Electricité de France SA [100.0%]	-22.3055	-41.8814	exact	Macaé			Rio de Janeiro	https://gem.wiki/Norte_Fluminense_power_station	L100000406520	G100000406784	FR0010242511	1	827	827	20	2044	2084	2124
oil/gas	Chile	Americas	Latin America and the Caribbean	Nueva Renca power station	1	Central Termoeléctrica Nueva Renca		379	operating	1997		CC	NG/D					Generadora Metropolitana SpA [100%]	Andes Mining & Energy SA [50.0%]; Electricité de France SA [50.0%]	-33.4184	-70.687	exact	Renca			Metropolitana de Santiago	https://gem.wiki/Nueva_Renca_power_station	L100000406561	G100000406723	FR0010242511	0.5	379	379	27	2037	2077	2117
oil/gas	Vietnam	Asia	South-eastern Asia	Phu My 2.2 Thermal power station	1	Nhà Máy Nhiệt Điện Phú Mỹ 2.2		733	operating	2005		CC	NG					Mekong Energy Co Ltd [100.0%]	EDF International SAS [56.2%]; Summit Global Management II BV [28.1%]; Tokyo Electric Power Company International BV [15.6%]	10.603	107.04	exact	Phú Mỹ			Ba Ria - Vung Tau	https://www.gem.wiki/Phu_My_2.2_Thermal_power_station	L100000405447	G100000404534	FR0010242511	0.562	733	733	19	2045	2085	2125
oil/gas	Martinique	Americas	Latin America and the Caribbean	Pointe des Carrières power station	GT1			27	operating	1996		GT	HFO/D					Electricité de France SA [100%]	Electricité de France SA [100.0%]	14.5973	-61.058	exact	Fort-de-France			Martinique	https://gem.wiki/Pointe_des_Carrières_power_station	L100000408644	G100000412006	FR0010242511	1	104		28	2036	2076	2116
oil/gas	Martinique	Americas	Latin America and the Caribbean	Pointe des Carrières power station	GT2			17	operating	1996		GT	HFO/D					Electricité de France SA [100%]	Electricité de France SA [100.0%]	14.5973	-61.058	exact	Fort-de-France			Martinique	https://gem.wiki/Pointe_des_Carrières_power_station	L100000408644	G100000412005	FR0010242511	1	104		28	2036	2076	2116
oil/gas	Martinique	Americas	Latin America and the Caribbean	Pointe des Carrières power station	IC			60	operating	1996		IC	HFO/D					Electricité de France SA [100%]	Electricité de France SA [100.0%]	14.5973	-61.058	exact	Fort-de-France			Martinique	https://gem.wiki/Pointe_des_Carrières_power_station	L100000408644	G100000412004	FR0010242511	1	104	104	28	2036	2076	2116
oil/gas	Guadeloupe	Americas	Latin America and the Caribbean	Pointe Jarry power station	IC1-12			211.2	operating	2014		IC	HFO					Electricité de France SA [100%]	Electricité de France SA [100.0%]	16.2323	-61.5541	exact	Baie-Mahault			Guadaloupe	https://gem.wiki/Pointe_Jarry_power_station	L100000408659	G100000412023	FR0010242511	1	211.2	211.2	10	2054	2094	2134
oil/gas	Chile	Americas	Latin America and the Caribbean	Renca power station	1	Termoeléctrica Renca		50	operating	1962		ST	D					Generadora Metropolitana SpA [100%]	Andes Mining & Energy SA [50.0%]; Electricité de France SA [50.0%]	-33.4179	-70.6876	exact	Renca			Metropolitana de Santiago	https://gem.wiki/Renca_power_station	L100000408572	G100000412129	FR0010242511	0.5	100		62	2002	2042	2082
oil/gas	Chile	Americas	Latin America and the Caribbean	Renca power station	2	Termoeléctrica Renca		50	operating	1962		ST	D					Generadora Metropolitana SpA [100%]	Andes Mining & Energy SA [50.0%]; Electricité de France SA [50.0%]	-33.4179	-70.6876	exact	Renca			Metropolitana de Santiago	https://gem.wiki/Renca_power_station	L100000408572	G100000412128	FR0010242511	0.5	100	100	62	2002	2042	2082
oil/gas	Belgium	Europe	Western Europe	Ringvaart power station	1			385	operating	1998		CC	NG					Luminus NV/SA [100%]	EDF Belgium SA [68.6%]; Pubilec CVBA/SCRL [26.4%]	51.1049	3.7257	exact	Gent			East Flanders	https://www.gem.wiki/Ringvaart_power_station	L100000400032	G100000400032	FR0010242511	0.686	620		26	2038	2078	2118
oil/gas	Belgium	Europe	Western Europe	Ringvaart power station	2			235	cancelled			GT	NG					Luminus NV/SA [100%]	EDF Belgium SA [68.6%]; Pubilec CVBA/SCRL [26.4%]	51.1049	3.7257	exact	Gent			East Flanders	https://www.gem.wiki/Ringvaart_power_station	L100000400032	G100000410395	FR0010242511	0.686	620	620	-99	40	80	120
oil/gas	Chile	Americas	Latin America and the Caribbean	Santa Lidia power station	1	Termoeléctrica Santa Lidia		139	operating	2009		GT	D					Generadora Metropolitana SpA [100%]	Andes Mining & Energy SA [50.0%]; Electricité de France SA [50.0%]	-37.0925	-72.3162	exact	Cabrero			Biobío	https://gem.wiki/Santa_Lidia_power_station	L100000408579	G100000412126	FR0010242511	0.5	139	139	15	2049	2089	2129
oil/gas	Belgium	Europe	Western Europe	Seraing power station	1			470	operating	1994		CC	NG					Luminus NV/SA [100%]	EDF Belgium SA [68.6%]; Pubilec CVBA/SCRL [26.4%]	50.603	5.4917	exact	Seraing			Liege	https://www.gem.wiki/Seraing_power_station	L100000400035	G100000400035	FR0010242511	0.686	1340		30	2034	2074	2114
oil/gas	Belgium	Europe	Western Europe	Seraing power station	2			870	pre-construction	2025		CC	NG					Luminus NV/SA [100%]	EDF Belgium SA [68.6%]; Pubilec CVBA/SCRL [26.4%]	50.603	5.4917	exact	Seraing			Liege	https://www.gem.wiki/Seraing_power_station	L100000400035	G100000406271	FR0010242511	0.686	1340	1340	-1	2065	2105	2145
oil/gas	Vietnam	Asia	South-eastern Asia	Son My I power station	1	Nhà máy Nhiệt điện Sơn Mỹ 1		2250	pre-construction	2030		CC	LNG					EDF [37.5%]; Pacific Corp [25.0%]; Kyushu Electric Power Co Inc [18.8%]; Sojitz Corp [18.8%]	Pacific Group JSC [25.0%]; Kyushu Electric Power Co Inc [18.8%]; Sojitz Corp [18.8%]	10.6501	107.685	approximate	Ham Tan			Binh Thuan	https://www.gem.wiki/Son_My_I_power_station	L100000405451	G100000404544	FR0010242511	0.375	2250	2250	-6	2070	2110	2150
oil/gas	Uzbekistan	Asia	Central Asia	Surkhandarya power station	CC1	ТЭС в Сурхандарьинской области/Сурхандарьинская ПГУ (Russian)	Surkhandarya Combined Cycle Power Plant	1600	construction	2027		CC	NG/FO					Nebras Power QPSC [35.0%]; Siemens Energy AG [25.0%]; Stone City Energy BV [25.0%]; EDF [15.0%]	Siemens Energy AG [25.0%]; Qatar Electricity and Water Company QPSC [21.0%]; Ras Laffan Operating Company WLL [14.0%]	37.3768	67.2521	exact	Angor		Angor	Surkhandarya	https://www.gem.wiki/Surkhandarya_power_station	L100000406876	G100000407376	FR0010242511	0.15	1600	1600	-3	2067	2107	2147
oil/gas	Uzbekistan	Asia	Central Asia	Syrdarya II power station	1	ТЭС «Сырдарья-2»/(Russian)		1573	construction	2026		CC	NG					EDF [33.3%]; Nebras Power QPSC [33.3%]; Sojitz Corp [19.0%]; Kyuden International Corp [14.3%]	Qatar Electricity and Water Company QPSC [20.0%]; Sojitz Corp [19.0%]; Kyushu Electric Power Co Inc [14.3%]; Ras Laffan Operating Company WLL [13.3%]	40.2421	69.1054	exact	Shirin		Bayaut	Sirdaryo	https://www.gem.wiki/Syrdarya_II_power_station	L100000406884	G100000407423	FR0010242511	0.333	1573	1573	-2	2066	2106	2146
oil/gas	France	Europe	Western Europe	Vaires power station	1			200	operating	2008		CC	HFO					EDF [100.0%]	EDF [100.0%]	48.8736	2.65585	exact	Vaires-sur-Marne			Seine-et-Marne	https://www.gem.wiki/Vaires_power_station	L100000104715	G100000412916	FR0010242511	1	1080		16	2048	2088	2128
oil/gas	France	Europe	Western Europe	Vaires power station	2			200	operating	2008		CC	HFO					EDF [100.0%]	EDF [100.0%]	48.8736	2.65585	exact	Vaires-sur-Marne			Seine-et-Marne	https://www.gem.wiki/Vaires_power_station	L100000104715	G100000412915	FR0010242511	1	1080		16	2048	2088	2128
oil/gas	France	Europe	Western Europe	Vaires power station	3			200	operating	2009		CC	HFO					EDF [100.0%]	EDF [100.0%]	48.8736	2.65585	exact	Vaires-sur-Marne			Seine-et-Marne	https://www.gem.wiki/Vaires_power_station	L100000104715	G100000412914	FR0010242511	1	1080	1080	15	2049	2089	2129
oil/gas	France	Europe	Western Europe	Varengeville power station	CHP			43	operating	1998		GT	NG					EDF [100.0%]	EDF [100.0%]	49.9025	1.002	approximate	Varengeville-sur-Mer			Haute-Normandy	https://www.gem.wiki/Varengeville_power_station	L100000407931	G100000410782	FR0010242511	1	43	43	26	2038	2078	2118
oil/gas	France	Europe	Western Europe	Vazzio power station	IC1		Ricanto	133	operating	1981		ICCC	HFO					EDF Production Electrique Insulaire SAS [100.0%]	Electricité de France SA [100.0%]	41.9321	8.72044	exact	Ajaccio			Corsica	https://www.gem.wiki/Vazzio_power_station	L100000400109	G100000412912	FR0010242511	1	278		43	2021	2061	2101
oil/gas	France	Europe	Western Europe	Vazzio power station	GT1		Ricanto	20	operating	2007		GT	NG					EDF Production Electrique Insulaire SAS [100.0%]	Electricité de France SA [100.0%]	41.9321	8.72044	exact	Ajaccio			Corsica	https://www.gem.wiki/Vazzio_power_station	L100000400109	G100000412913	FR0010242511	1	278		17	2047	2087	2127
oil/gas	France	Europe	Western Europe	Vazzio power station	IC2		Ricanto	125	pre-construction	2026		ICCC	NG/B					EDF Production Electrique Insulaire SAS [100.0%]	Electricité de France SA [100.0%]	41.9321	8.72044	exact	Ajaccio			Corsica	https://www.gem.wiki/Vazzio_power_station	L100000400109	G100000400109	FR0010242511	1	278	278	-2	2066	2106	2146
oil/gas	France	Europe	Western Europe	Vitry-Arrighi power station	1		Centrale thermique à fioul de Vitry-Arrighi	125	operating	1997		GT	HFO/NG					EDF [100.0%]	EDF [100.0%]	48.7865	2.41879	exact	Vitry-sur-Seine			Val-de-Marne	https://www.gem.wiki/Vitry-Arrighi_power_station	L100000406382	G100000406300	FR0010242511	1	250		27	2037	2077	2117
oil/gas	France	Europe	Western Europe	Vitry-Arrighi power station	2		Centrale thermique à fioul de Vitry-Arrighi	125	operating	2007		GT	HFO/NG					EDF [100.0%]	EDF [100.0%]	48.7865	2.41879	exact	Vitry-sur-Seine			Val-de-Marne	https://www.gem.wiki/Vitry-Arrighi_power_station	L100000406382	G100000406299	FR0010242511	1	250	250	17	2047	2087	2127
oil/gas	France	Europe	Western Europe	Vitry-sur-Seine cogeneration power station	1			125	operating	2001		GT	NG					COGETHERM; Paris Urban Heating Company SA	City of Paris; ENGIE SA; Electricité de France SA	48.7892	2.41731	exact	Vitry-sur-Seine			Val-de-Marne	https://www.gem.wiki/Vitry-sur-Seine_cogeneration_power_station	L100000406385	G100000406298	FR0010242511	0.33	125	125	23	2041	2081	2121
oil/gas	United Kingdom	Europe	Northern Europe	West Burton power station	C			299	shelved			GT	NG					EDF Energy [100.0%]	EDF Energy [100.0%]	53.3622	-0.80759	exact	Retford			Nottinghamshire	https://www.gem.wiki/West_Burton_power_station	L100000103762	G100000400806	FR0010242511	1	2487	2487	-99	40	80	120
solar	United Arab Emirates	Asia	Western Asia	Al Dhafra solar farm	2	محطة الظفرة للطاقة الشمسية الكهروضوئية		2000	operating	2022		PV						Abu Dhabi National Energy Company (TAQA) [40%]; Masdar Clean Energy [20%]; EDF Renewables [20%]; Jinko Power Technology CO LTD [20%]		24.1456	54.5139	approximate			Al Dhafra	Emirate of Abu Dhabi	https://gem.wiki/Al_Dhafra_solar_farm	L804030	G804601	FR0010242511	0.2	2000	2000	2	2062	2102	2142
solar	United States	Americas	Northern America	American Robin Solar Project				120	pre-construction	2025		PV						EDF Renewables		37.019	-86.0346	approximate		Barren County		Kentucky	https://gem.wiki/American_Robin_Solar_Project	L805016	G805785	FR0010242511	1	120	120	-1	2065	2105	2145
solar	Canada	Americas	Northern America	Arnprior solar farm			Arnprior Solar Generating Station	23	operating	2010		PV						EDF Renewables		45.4083	-76.271	exact	West Carleton	Ottawa	Eastern Ontario	Ontario	https://gem.wiki/Arnprior_solar_farm	L804425	G805082	FR0010242511	1	23	23	14	2050	2090	2130
solar	United States	Americas	Northern America	Arrow Canyon Solar Hybrid				200	operating	2022		PV						EDF Renewables		36.4593	-114.844	exact	Moapa	Clark County		Nevada	https://gem.wiki/Arrow_Canyon_Solar_Hybrid	L804427	G805084	FR0010242511	1	200	200	2	2062	2102	2142
solar	Israel	Asia	Western Asia	Ashalim PV solar farm	1		Ashalim Sun	35	operating	2018		PV						EDF Renewables [50%]; Clal Sun LTD [50%]		30.9782	34.7475	exact	Ramat Negev Regional Council		Beersheba Subdistrict	South District	https://gem.wiki/Ashalim_PV_solar_farm	L809106	G811430	FR0010242511	0.5	77		6	2058	2098	2138
solar	Israel	Asia	Western Asia	Ashalim PV solar farm	2			42	operating	2023		PV						EDF Renewables		30.9611	34.6645	exact	Ramat Negev Regional Council		Beersheba Subdistrict	South District	https://gem.wiki/Ashalim_PV_solar_farm	L809106	G811431	FR0010242511	1	77	77	1	2063	2103	2143
solar	United States	Americas	Northern America	Avalon (EDF Renewables) solar farm				100	cancelled			PV						EDF Renewables		35.011	-118.19	approximate	Mojave			California	https://gem.wiki/Avalon_(EDF_Renewables)_solar_farm	L805017	G805786	FR0010242511	1	100	100	-99	40	80	120
solar	Egypt	Africa	Northern Africa	Benban Elsewedy/EDF solar farm	PV 1			65	operating	2019		PV						Elsewedy Electric; EDF Renewables		24.418	32.693	exact	Benban	Markaz Deraw		Aswan Governorate	https://gem.wiki/Benban_Elsewedy/EDF_solar_farm	L800179	G800223	FR0010242511	0.5	130		5	2059	2099	2139
solar	Egypt	Africa	Northern Africa	Benban Elsewedy/EDF solar farm	PV 2			65	operating	2019		PV						Elsewedy Electric; EDF Renewables		24.418	32.693	approximate	Benban	Markaz Deraw		Aswan Governorate	https://gem.wiki/Benban_Elsewedy/EDF_solar_farm	L800179	G800224	FR0010242511	0.5	130	130	5	2059	2099	2139
solar	United States	Americas	Northern America	Big Beau Solar				128	operating	2022		PV						EDF Renewables		34.907	-118.344	exact	Kern			California	https://gem.wiki/Big_Beau_Solar	L805018	G805787	FR0010242511	1	128	128	2	2062	2102	2142
solar	United Kingdom	Europe	Northern Europe	Bloy’s Grove solar farm			Bloyís Grove Solar Farm	50	pre-construction			PV						EDF Renewables		52.5519	1.2671	exact		Norfolk	Eastern	England	https://gem.wiki/Bloy’s_Grove_solar_farm	L825174	G828460	FR0010242511	1	50		-99	40	80	120
solar	United States	Americas	Northern America	Blue Marmot Solar				50	shelved			PV						EDF Renewables		42.5617	-120.757	approximate	Lakeveiw	Lake County		Oregon	https://gem.wiki/Blue_Marmot_Solar	L804428	G805085	FR0010242511	1	50	50	-99	40	80	120
solar	Mexico	Americas	Latin America and the Caribbean	Bluemex Power Solar Project	1	Proyecto Solar Bluemex Power		120	operating	2019		PV						EDF Renewables		27.9973	-110.713	exact		Empalme		Sonora	https://gem.wiki/Bluemex_Power_Solar_Project	L807127	G808280	FR0010242511	1	120	120	5	2059	2099	2139
solar	Ireland	Europe	Northern Europe	Blusheens solar farm				8	operating	2023		PV						EDF Renewables		52.2563	-6.4565	approximate	Killinick				https://gem.wiki/Blusheens_solar_farm	L822765	G825830	FR0010242511	1	8	8	1	2063	2103	2143
solar	United States	Americas	Northern America	Bradley Solar Project				120	pre-construction	2027		PV						EDF Renewables		45.3623	-68.5051	approximate		Penobscot County		Maine	https://gem.wiki/Bradley_Solar_Project	L805019	G805788	FR0010242511	1	120	120	-3	2067	2107	2147
solar	United Kingdom	Europe	Northern Europe	Burwell solar farm				50	construction	2023		PV						EDF Renewables		52.284	0.304	exact	East Cambridgeshire	Cambridgeshire	Eastern	England	https://gem.wiki/Burwell_solar_farm	L806224	G807155	FR0010242511	1	50	50	1	2063	2103	2143
solar	United States	Americas	Northern America	Byron Solar Project				200	pre-construction	2025		PV						EDF Renewables		44.0175	-92.8678	approximate		Dodge County		Minnesota	https://gem.wiki/Byron_Solar_Project	L805020	G805789	FR0010242511	1	200	200	-1	2065	2105	2145
solar	Chile	Americas	Latin America and the Caribbean	CEME solar farm	1	Parque Solar CEME		480	construction	2024		PV						EDF Energie Nouvelles		-23.6645	-70.3475	approximate				Antofagasta	https://gem.wiki/CEME_solar_farm	L807979	G810076	FR0010242511	1	480	480	0	2064	2104	2144
solar	United States	Americas	Northern America	Chipmunk Solar				400	announced	2024		PV						EDF Renewables; Geenex Solar		39.6725	-83.0373	approximate		Pickaway County		Ohio	https://gem.wiki/Chipmunk_Solar	L805037	G805808	FR0010242511	0.5	400	400	0	2064	2104	2144
solar	United States	Americas	Northern America	Chuckwalla Solar				200	pre-construction	2025		PV						EDF Renewables		36.5162	-114.697	exact	North las Vegas	Clark County		Nevada	https://gem.wiki/Chuckwalla_Solar	L804429	G805086	FR0010242511	1	200	200	-1	2065	2105	2145
solar	United States	Americas	Northern America	Columbia (EDF Renewables) solar farm				350	pre-construction	2025		PV						EDF Renewables		42.9112	-75.0704	approximate		Herkimer County	Columbia	New York	https://gem.wiki/Columbia_(EDF_Renewables)_solar_farm	L805021	G805790	FR0010242511	1	350	350	-1	2065	2105	2145
solar	Ireland	Europe	Northern Europe	Coolroe solar farm				5	operating	2023		PV						EDF Renewables		52.2804	-6.8399	approximate	Ballyculane				https://gem.wiki/Coolroe_solar_farm	L822769	G825834	FR0010242511	1	5	5	1	2063	2103	2143
solar	France	Europe	Western Europe	Crucey Solar Power Plant	1			60	operating	2012		PV						EDF Energie Nouvelles		48.6425	1.1023	exact		Eure-et-Loir		Centre-Loire Valley	https://gem.wiki/Crucey_Solar_Power_Plant	L805756	G806624	FR0010242511	1	60	60	12	2052	2092	2132
solar	Ireland	Europe	Northern Europe	Curraghmartin solar farm				4	operating	2023		PV						EDF Renewables		52.2709	-7.2159	approximate	Carrigeen				https://gem.wiki/Curraghmartin_solar_farm	L822770	G825835	FR0010242511	1	4	4	1	2063	2103	2143
solar	United States	Americas	Northern America	Desert Harvest solar farm	1			80	operating	2020		PV						EDF Renewables		33.8001	-115.38	exact		Riverside County		California	https://gem.wiki/Desert_Harvest_solar_farm	L804430	G805088	FR0010242511	1	150		4	2060	2100	2140
solar	United States	Americas	Northern America	Desert Harvest solar farm	2			70	operating	2020		PV						EDF Renewables		33.8001	-115.38	exact		Riverside County		California	https://gem.wiki/Desert_Harvest_solar_farm	L804430	G805087	FR0010242511	1	150	150	4	2060	2100	2140
solar	United States	Americas	Northern America	Desert Quartzite solar farm				300	construction	2024		PV						EDF Renewables		33.565	-114.753	exact	Blythe	Riverside County		California	https://gem.wiki/Desert_Quartzite_solar_farm	L804477	G805148	FR0010242511	1	300	300	0	2064	2104	2144
solar	United States	Americas	Northern America	Eastern Cottontail Solar Project				250	pre-construction	2026		PV						EDF Renewables		39.7739	-82.6136	approximate		Fairfield County		Ohio	https://gem.wiki/Eastern_Cottontail_Solar_Project	L808421	G810639	FR0010242511	1	250	250	-2	2066	2106	2146
solar	United States	Americas	Northern America	Edora C solar farm				20	shelved			PV						EDF Renewables		41.393	-74.4657	approximate			Wawayanda	New York	https://gem.wiki/Edora_C_solar_farm	L805363	G806193	FR0010242511	1	20	20	-99	40	80	120
solar	Canada	Americas	Northern America	Elmsley East / West solar farm			Elmsley	24	operating	2010		PV						EDF Renewables		44.8483	-76.0692	exact	Rideau Lakes	Leeds and Grenville Counties	Eastern Ontario	Ontario	https://gem.wiki/Elmsley_East_/_West_solar_farm	L804426	G805083	FR0010242511	1	24	24	14	2050	2090	2130
solar	United States	Americas	Northern America	Estill Solar				20	operating	2017		PV						EDF Renewables		32.7638	-81.2422	exact	Estill	Hampton County		South Carolina	https://gem.wiki/Estill_Solar	L804431	G805089	FR0010242511	1	20	20	7	2057	2097	2137
solar	United States	Americas	Northern America	Fox Squirrel Solar				577	pre-construction	2024		PV						EDF Renewables		39.7832	-83.3451	exact		Madison County		Ohio	https://gem.wiki/Fox_Squirrel_Solar	L805022	G805791	FR0010242511	1	577	577	0	2064	2104	2144
solar	France	Europe	Western Europe	Gabardan Solar Power Plant	1			65	operating	2010		PV						EDF Energie Nouvelles		44.0586	-0.0127	exact		Landes		New Aquitaine	https://gem.wiki/Gabardan_Solar_Power_Plant	L805757	G806625	FR0010242511	1	65	65	14	2050	2090	2130
solar	United States	Americas	Northern America	Genesee Road solar farm				250	pre-construction	2027		PV						EDF Renewables		42.8857	-78.877	approximate	Sardiana	Erie County		New York	https://gem.wiki/Genesee_Road_solar_farm	L805023	G805792	FR0010242511	1	250	250	-3	2067	2107	2147
solar	United Kingdom	Europe	Northern Europe	Glassthorpe Hill solar farm			Glassthorpe Hill Flore - Solar Farm	50	pre-construction			PV						EDF Renewables		52.2476	-1.0469	exact		Northamptonshire	East Midlands	England	https://gem.wiki/Glassthorpe_Hill_solar_farm	L825616	G828932	FR0010242511	1	50	50	-99	40	80	120
solar	Bulgaria	Europe	Eastern Europe	Granitovo solar farm				21	cancelled			PV						EDF Renewables		42.6074	25.4857	approximate		Elhovo Municipality		Yambol Province	https://gem.wiki/Granitovo_solar_farm	L806225	G807156	FR0010242511	1	21	21	-99	40	80	120
solar	United States	Americas	Northern America	Holliday Creek Solar				118	operating	2022		PV						EDF Renewables		42.5687	-94.1028	exact	Fort Dodge	Webster County		Iowa	https://gem.wiki/Holliday_Creek_Solar	L804598	G805293	FR0010242511	1	118	118	2	2062	2102	2142
solar	United States	Americas	Northern America	Homer solar farm			Homer Cortland	90	pre-construction	2025		PV						EDF Renewables		42.6587	-76.0999	approximate	Homer	Cortland County		New York	https://gem.wiki/Homer_solar_farm	L805024	G805793	FR0010242511	1	90	90	-1	2065	2105	2145
solar	Peru	Americas	Latin America and the Caribbean	Iquitos (EDF) solar farm		Parque Solar Iquitos (EDF)		100	announced	2026		PV						EDF Renewables		-3.7149	-73.2442	approximate	Punchana			Loreto	https://gem.wiki/Iquitos_(EDF)_solar_farm	L808299	G810471	FR0010242511	1	100	100	-2	2066	2106	2146
solar	United States	Americas	Northern America	Jacksonville 5 Solar	1			50	cancelled			PV						EDF Renewables		30.3296	-81.6606	approximate	Jacksonville			Florida	https://gem.wiki/Jacksonville_5_Solar	L804432	G805090	FR0010242511	1	250		-99	40	80	120
solar	United States	Americas	Northern America	Jacksonville 5 Solar	2			50	cancelled			PV						EDF Renewables		30.3296	-81.6606	approximate	Jacksonville			Florida	https://gem.wiki/Jacksonville_5_Solar	L804432	G805091	FR0010242511	1	250		-99	40	80	120
solar	United States	Americas	Northern America	Jacksonville 5 Solar	3			50	cancelled			PV						EDF Renewables		30.3296	-81.6606	approximate	Jacksonville			Florida	https://gem.wiki/Jacksonville_5_Solar	L804432	G805092	FR0010242511	1	250		-99	40	80	120
solar	United States	Americas	Northern America	Jacksonville 5 Solar	4			50	cancelled			PV						EDF Renewables		30.3296	-81.6606	approximate	Jacksonville			Florida	https://gem.wiki/Jacksonville_5_Solar	L804432	G805093	FR0010242511	1	250		-99	40	80	120
solar	United States	Americas	Northern America	Jacksonville 5 Solar	5			50	cancelled			PV						EDF Renewables		30.3296	-81.6606	approximate	Jacksonville			Florida	https://gem.wiki/Jacksonville_5_Solar	L804432	G805094	FR0010242511	1	250	250	-99	40	80	120
solar	Saudi Arabia	Asia	Western Asia	Jeddah Solar Project		محطة جدة للطاقة الشمسية, محطة نور جنوب جدة	Third Jeddah Solar, South Jeddah Noor solar farm	300	construction			PV						Masdar Clean Energy; EDF Renewables; Nesma Holding CO LTD		21.4837	39.1729	approximate	Third Jeddah Industrial City			Jeddah	https://gem.wiki/Jeddah_Solar_Project	L804083	G804665	FR0010242511	0.33	300	300	-99	40	80	120
solar	United States	Americas	Northern America	K-Junction Solar				310	pre-construction	2026		PV						EDF Renewables		41.1091	-98.0141	approximate				Nebraska	https://gem.wiki/K-Junction_Solar	L805025	G805794	FR0010242511	1	310	310	-2	2066	2106	2146
solar	Greece	Europe	Southern Europe	Kokoraiika solar farm		Κοκοραιικα		2.7	operating			PV						EDF Renewables Greece		38.4228	22.2902	exact	Municipal Unit of Galaxidi	Regional Unit of Phocis	Central Greece	Thessaly and Central Greece	https://gem.wiki/Kokoraiika_solar_farm	L822467	G825523	FR0010242511	1	2.7	2.7	-99	40	80	120
solar	Greece	Europe	Southern Europe	Labrainas solar farm		Λαμπραινας		1.8	operating			PV						EDF Renewables Greece		36.8662	22.6335	exact		Laconia Regional Unit	Peloponnese Region	Peloponnese, Western Greece and the Ionian	https://gem.wiki/Labrainas_solar_farm	L822504	G825561	FR0010242511	1	1.8	1.8	-99	40	80	120
solar	United States	Americas	Northern America	Lake Trout Solar Project				245	pre-construction	2025		PV						EDF Renewables; Geenex Solar		40.4693	-85.3306	approximate		Blackford County		Indiana	https://gem.wiki/Lake_Trout_Solar_Project	L805038	G805809	FR0010242511	0.5	245	245	-1	2065	2105	2145
solar	France	Europe	Western Europe	Lazer Solar Power Facility				20	construction	2023		PV						EDF Energie Nouvelles		44.346	5.8572	approximate	Lazer			Hautes-Alpes	https://gem.wiki/Lazer_Solar_Power_Facility	L805760	G806628	FR0010242511	1	20	20	1	2063	2103	2143
solar	United Kingdom	Europe	Northern Europe	Longfield solar farm			Longfield	500	pre-construction			PV						EDF Renewables; Padero Solar (PS) Renewables		51.7832	0.545	exact		Essex	Eastern	England	https://gem.wiki/Longfield_solar_farm	L825925	G829261	FR0010242511	0.5	500	500	-99	40	80	120
solar	United States	Americas	Northern America	Louise Solar				50	announced	2024		PV						EDF Renewables		43.6832	-92.7537	approximate		Mower County		Minnesota	https://gem.wiki/Louise_Solar	L805026	G805795	FR0010242511	1	50	50	0	2064	2104	2144
solar	Australia	Oceania	Australia and New Zealand	Malabar solar farm			Maxwell solar farm	25	pre-construction			PV						Malabar Resources LTD; EDF Renewables		-31.876	147.287	approximate			Upper Hunter Valley	New South Wales	https://gem.wiki/Malabar_solar_farm	L805617	G806462	FR0010242511	0.5	25	25	-99	40	80	120
solar	Israel	Asia	Western Asia	Mashabai Sadeh solar farm			Mashabei Sadei PV plant	60	operating	2018		PV						EDF Renewables		31.0119	34.7594	exact	Ramat Negev Regional Council		Beersheba Subdistrict	South District	https://gem.wiki/Mashabai_Sadeh_solar_farm	L804056	G804633	FR0010242511	1	60	60	6	2058	2098	2138
solar	France	Europe	Western Europe	Massangis Solar Power Plant	1			56	operating	2012		PV						EDF Energie Nouvelles		47.634	3.9655	exact		Yonne		Bourgogne-Franche-Comté	https://gem.wiki/Massangis_Solar_Power_Plant	L805758	G806626	FR0010242511	1	56	56	12	2052	2092	2132
solar	United States	Americas	Northern America	Maverick Solar	1		Palen Solar	125	operating	2020		PV						EDF Renewables		33.7001	-115.38	exact		Riverside County		California	https://gem.wiki/Maverick_Solar	L804433	G805096	FR0010242511	1	457		4	2060	2100	2140
solar	United States	Americas	Northern America	Maverick Solar	4		Palen Solar	100	operating	2020		PV						EDF Renewables		33.7001	-115.38	exact		Riverside County		California	https://gem.wiki/Maverick_Solar	L804433	G805095	FR0010242511	1	457		4	2060	2100	2140
solar	United States	Americas	Northern America	Maverick Solar	6		Palen Solar	100	operating	2021		PV						EDF Renewables [50%]; MEAG [50%]		33.7001	-115.38	exact	Desert Center	Riverside County		California	https://gem.wiki/Maverick_Solar	L804433	G805806	FR0010242511	0.5	457		3	2061	2101	2141
solar	United States	Americas	Northern America	Maverick Solar	7		Palen Solar	132	operating	2021		PV						EDF Renewables [50%]; MEAG [50%]		33.7001	-115.38	exact	Desert Center	Riverside County		California	https://gem.wiki/Maverick_Solar	L804433	G805807	FR0010242511	0.5	457	457	3	2061	2101	2141
solar	South Africa	Africa	Sub-Saharan Africa	Mogalakwena Mine solar farm				100	pre-construction	2024		PV						EDF Renewables; Pele Energy Group; Community Owned - Anglo American Platinum Community Trust [10%]		-23.9785	28.9124	approximate	Mogalakwena Local Municipality	Waterberg District Municipality		Limpopo	https://gem.wiki/Mogalakwena_Mine_solar_farm	L811657	G814213	FR0010242511	0.33	100	100	0	2064	2104	2144
solar	United States	Americas	Northern America	Moraine solar farm				94	pre-construction	2025		PV						EDF Renewables		42.4298	-77.725	approximate		Burns County	Allegany	New York	https://gem.wiki/Moraine_solar_farm	L805027	G805796	FR0010242511	1	94	94	-1	2065	2105	2145
solar	United States	Americas	Northern America	Morris Ridge solar farm				177	pre-construction	2024		PV						EDF Renewables		42.7338	-77.8836	approximate		Livingston County	Mount Morris	New York	https://gem.wiki/Morris_Ridge_solar_farm	L805028	G805797	FR0010242511	1	177	177	0	2064	2104	2144
solar	Laos	Asia	South-eastern Asia	Nam Theun 2 solar farm			NT2-Solar, Nam Theun floating solar power project, Nam Theun-2 Solar	240	pre-construction	2024		PV						Electricité De France (EDF); Lao Holding State Enterprise (LHSE); Electricity Generating PCL (EGCO); Innosea		17.9965	104.954	approximate				Khammouane	https://gem.wiki/Nam_Theun_2_solar_farm	L801183	G801363	FR0010242511	0.25	240	240	0	2064	2104	2144
solar	Morocco	Africa	Northern Africa	Noor Midelt II solar farm	2-Solar Thermal	محطة نور ميدلت للطاقة الشمسية ٢		115	shelved			Solar Thermal						EDF Renewables [35%]; Abu Dhabi Future Energy CO [30%]; Moroccan Agency for Sustainable Energy (MASEN) [25%]; Green Of Africa [10%]		32.8838	-4.7101	approximate	Draa-Tafilalet	Atlas Mountains			https://gem.wiki/Noor_Midelt_II_solar_farm	L827475	G800290	FR0010242511	0.35	115	115	-99	40	80	120
solar	Morocco	Africa	Northern Africa	Noor Midelt solar farm	1-PV	محطة نور ميدلت للطاقة الشمسية ١		400	construction	2024		PV						Masdar Clean Energy; EDF Renewables; Green of Africa; MASEN		32.8838	-4.7101	approximate	Midelt		Midelt Province		https://gem.wiki/Noor_Midelt_solar_farm	L800243	G814166	FR0010242511	0.25	800		0	2064	2104	2144
solar	Morocco	Africa	Northern Africa	Noor Midelt solar farm	1-Solar Thermal	محطة نور ميدلت للطاقة الشمسية ١		400	construction	2024		Solar Thermal						Masdar Clean Energy; EDF Renewables; Green of Africa; MASEN		32.8838	-4.7101	approximate	Midelt		Midelt Province		https://gem.wiki/Noor_Midelt_solar_farm	L800243	G800289	FR0010242511	0.25	800	800	0	2064	2104	2144
solar	United Kingdom	Europe	Northern Europe	North Anglesey Solar			Rhyd y Groes solar farm, Porth Wen solar farm, Rhyd y Groes	50	construction	2023		PV						EDF Renewables		53.4057	-4.4202	exact		Isle of Anglesey		Wales	https://gem.wiki/North_Anglesey_Solar	L806223	G807154	FR0010242511	1	50	50	1	2063	2103	2143
solar	United States	Americas	Northern America	Northern Bobwhite Solar Project				96	pre-construction	2025		PV						EDF Renewables		37.5414	-85.265	approximate		Marion County		Kentucky	https://gem.wiki/Northern_Bobwhite_Solar_Project	L805029	G805798	FR0010242511	1	96	96	-1	2065	2105	2145
solar	Chile	Americas	Latin America and the Caribbean	Peldehue solar farm		Parque Solar Peldehue		120	pre-construction			PV						EDF Renewables		-33.2224	-70.5591	approximate	Colina	Provincia de Chacabuco		Santiago Metropolitan Region	https://gem.wiki/Peldehue_solar_farm	L808001	G810101	FR0010242511	1	120	120	-99	40	80	120
solar	Brazil	Americas	Latin America and the Caribbean	Pirapora Solar Complex	1	Complexo Solar Pirapora	Vazante	192	operating	2017		PV						EDF Renewables; Omega Geração		-17.4068	-44.9186	exact	Pirapora		Região Geográfica Intermediária de Montes Claros	Minas Gerais	https://gem.wiki/Pirapora_Solar_Complex	L807126	G808277	FR0010242511	0.5	396		7	2057	2097	2137
solar	Brazil	Americas	Latin America and the Caribbean	Pirapora Solar Complex	2	Complexo Solar Pirapora	Vazante	112	operating	2017		PV						EDF Renewables; Omega Geração		-17.4086	-44.8736	exact	Pirapora		Região Geográfica Intermediária de Montes Claros	Minas Gerais	https://gem.wiki/Pirapora_Solar_Complex	L807126	G808278	FR0010242511	0.5	396		7	2057	2097	2137
solar	Brazil	Americas	Latin America and the Caribbean	Pirapora Solar Complex	3	Complexo Solar Pirapora	Vazante	92	operating	2018		PV						EDF Renewables; Omega Geração		-17.4087	-44.8854	exact	Pirapora		Região Geográfica Intermediária de Montes Claros	Minas Gerais	https://gem.wiki/Pirapora_Solar_Complex	L807126	G808279	FR0010242511	0.5	396	396	6	2058	2098	2138
solar	United States	Americas	Northern America	Playa Solar 1	1		Switch Station 1, Switch Solar	79	operating	2017		PV						EDF Renewables		36.408	-114.908	exact		Clark County		Nevada	https://gem.wiki/Playa_Solar_1	L804434	G805097	FR0010242511	1	179		7	2057	2097	2137
solar	United States	Americas	Northern America	Playa Solar 1	2		Switch Station 2, Switch Solar	100	operating	2017		PV						EDF Renewables		36.408	-114.908	exact		Clark County		Nevada	https://gem.wiki/Playa_Solar_1	L804434	G810728	FR0010242511	1	179	179	7	2057	2097	2137
solar	United States	Americas	Northern America	Red House Solar				500	pre-construction	2025		PV						EDF Renewables		41.45	-118.13	approximate		Humbolt County		Nevada	https://gem.wiki/Red_House_Solar	L805030	G805799	FR0010242511	1	500	500	-1	2065	2105	2145
solar	French Guiana	Americas	Latin America and the Caribbean	Rewatt solar farm		Parque Solar Rewatt		2.7	operating	2011		PV						EDF Renewables		3.8368	-54.1571	approximate				French Guiana	https://gem.wiki/Rewatt_solar_farm	L832469	G838029	FR0010242511	1	2.7	2.7	13	2051	2091	2131
solar	United States	Americas	Northern America	Rich Road solar farm				240	pre-construction	2025		PV						EDF Renewables		44.5942	-75.1814	approximate		St. Lawrence County	Canton	New York	https://gem.wiki/Rich_Road_solar_farm	L805031	G805800	FR0010242511	1	240	240	-1	2065	2105	2145
solar	United States	Americas	Northern America	Ridge View solar farm				350	pre-construction	2025		PV						EDF Renewables		43.2921	-78.5686	approximate		Niagara County	Hartland	New York	https://gem.wiki/Ridge_View_solar_farm	L805032	G805801	FR0010242511	1	350	350	-1	2065	2105	2145
solar	United States	Americas	Northern America	Rosalen solar farm				200	pre-construction	2027		PV						EDF Renewables		43.1569	-77.0384	approximate		Wayne County	Rose	New York	https://gem.wiki/Rosalen_solar_farm	L805033	G805802	FR0010242511	1	200	200	-3	2067	2107	2147
solar	Mexico	Americas	Latin America and the Caribbean	Santa Lucia solar farm		Planta Soalr Santa Lucia		198	pre-construction			PV						EDF Renewables		19.8234	-90.5249	approximate				Campeche	https://gem.wiki/Santa_Lucia_solar_farm	L832583	G838154	FR0010242511	1	198	198	-99	40	80	120
solar	United States	Americas	Northern America	Sawtooth (Arizona) Solar				250	announced	2026		PV						EDF Renewables		32.7199	-111.62	approximate		Pinal County		Arizona	https://gem.wiki/Sawtooth_(Arizona)_Solar	L833248	G838940	FR0010242511	1	250	250	-2	2066	2106	2146
solar	United States	Americas	Northern America	Sculpin Solar				180	announced	2025		PV						EDF Renewables		41.3646	-84.8438	approximate		DeKalb County		Indiana	https://gem.wiki/Sculpin_Solar	L833251	G838943	FR0010242511	1	180	180	-1	2065	2105	2145
solar	China	Asia	Eastern Asia	Shandong Zhongxing Zhufuzhuang Reservior Fishery solar farm	1	新泰市汶南镇重兴水库、东都镇祝福庄水库100MW渔光互补项目（第一期）	Xintai City Wennan Town Chongxing Reservoir and Dongdu Town Fuzhuang Reservoir 100MW Fishery and Solar Complementary Project	50	shelved			PV						EDF Renewables China Investment II (HK) LTD		35.8084	117.74	approximate	Wennan Town	Xintai	Tai'an	Shandong	https://gem.wiki/Shandong_Zhongxing_Zhufuzhuang_Reservior_Fishery_solar_farm	L811265	G813737	FR0010242511	1	50	50	-99	40	80	120
solar	French Guiana	Americas	Latin America and the Caribbean	Sioulé solar farm		Parque Solar Sioulé		1.3	operating	2011		PV						EDF Renewables		5.041	-52.4982	approximate				French Guiana	https://gem.wiki/Sioulé_solar_farm	L832470	G838030	FR0010242511	1	1.3	1.3	13	2051	2091	2131
solar	United States	Americas	Northern America	Space City Solar				345	construction			PV						EDF Renewables		29.5535	-96.2105	approximate		Wharton County		Texas	https://gem.wiki/Space_City_Solar	L805034	G805803	FR0010242511	1	345	345	-99	40	80	120
solar	United Kingdom	Europe	Northern Europe	Springwell solar farm				800	announced			PV						EDF Renewables; Luminous Energy LTD		53.225	-0.5722	approximate	Lincoln			England	https://gem.wiki/Springwell_solar_farm	L826431	G829806	FR0010242511	0.5	800	800	-99	40	80	120
solar	Canada	Americas	Northern America	St. Isidore A solar project				12	operating			PV						EDF Energies Nouvelles		45.4289	-74.9374	exact	St Isidore			Ontario	https://gem.wiki/St._Isidore_A_solar_project	L832038	G837575	FR0010242511	1	12		-99	40	80	120
solar	Canada	Americas	Northern America	St. Isidore B solar project				12	operating			PV						EDF Energies Nouvelles		45.3637	-74.9092	exact	St Isidore			Ontario	https://gem.wiki/St._Isidore_B_solar_project	L832039	G837576	FR0010242511	1	12	12	-99	40	80	120
solar	United States	Americas	Northern America	Suffragette solar farm			Seneca County solar farm	20	pre-construction	2025		PV						EDF Renewables		42.9092	-76.7984	approximate			Seneca Falls	New York	https://gem.wiki/Suffragette_solar_farm	L805424	G806256	FR0010242511	1	20	20	-1	2065	2105	2145
solar	United Kingdom	Europe	Northern Europe	Sutton Bridge solar farm				50	construction			PV						EDF Renewables		52.7875	-0.1516	approximate	Spalding			Lincolnshire	https://gem.wiki/Sutton_Bridge_solar_farm	L806221	G807152	FR0010242511	1	50	50	-99	40	80	120
solar	Ireland	Europe	Northern Europe	TDC Community solar farm				80	pre-construction	2025		PV						EDF Renewables		53.6288	-8.1893	approximate	Roscommon				https://gem.wiki/TDC_Community_solar_farm	L822783	G825849	FR0010242511	1	80	80	-1	2065	2105	2145
solar	Israel	Asia	Western Asia	Timna solar farm				60	operating	2021		PV						EDF Renewables		29.755	35.007	exact	Timna Park	Eliat	Southern District		https://gem.wiki/Timna_solar_farm	L804055	G804632	FR0010242511	1	60	60	3	2061	2101	2141
solar	Greece	Europe	Southern Europe	Tolofonas solar farm		Τολοφωνας		1.1	operating			PV						EDF Renewables Greece		38.3845	22.2176	exact	Municipal Unit of Tolofona	Regional Unit of Phocis	Central Greece	Thessaly and Central Greece	https://gem.wiki/Tolofonas_solar_farm	L822699	G825764	FR0010242511	1	1.1	1.1	-99	40	80	120
solar	United States	Americas	Northern America	Toms River solar farm			EDF Ph1 Toms River	21	operating	2021		PV						EDF Renewables; PVOne		39.984	-74.238	exact	Tom's River	Ocean County		New Jersey	https://gem.wiki/Toms_River_solar_farm	L804511	G805191	FR0010242511	0.5	21	21	3	2061	2101	2141
solar	French Guiana	Americas	Latin America and the Caribbean	Toucan solar farm	1	Parque Solar Toucan		5	operating	2014		PV						EDF Renewables		4.8685	-52.5011	approximate	Montsinéry-Tonnégrande				https://gem.wiki/Toucan_solar_farm	L808289	G810460	FR0010242511	1	10		10	2054	2094	2134
solar	French Guiana	Americas	Latin America and the Caribbean	Toucan solar farm	2	Parque Solar Toucan		5	announced			PV						EDF Renewables		4.8685	-52.5011	approximate	Montsinéry-Tonnegrande			French Guiana	https://gem.wiki/Toucan_solar_farm	L808289	G838031	FR0010242511	1	10	10	-99	40	80	120
solar	France	Europe	Western Europe	Toul-Rosières Solar Park	3			36	operating	2012		PV						EDF Energie Nouvelles		48.783	5.9826	exact		Meurthe-et-Moselle		Grand Est	https://gem.wiki/Toul-Rosières_Solar_Park	L805759	G806627	FR0010242511	1	36	36	12	2052	2092	2132
solar	United States	Americas	Northern America	Tracy solar farm			Lafargeville Solar, Tracy Solar Energy Center	119	pre-construction	2025		PV						EDF Renewables		44.1608	-75.9904	exact		Jefferson County	Orleans	New York	https://gem.wiki/Tracy_solar_farm	L805035	G805804	FR0010242511	1	119	119	-1	2065	2105	2145
solar	United Kingdom	Europe	Northern Europe	Tye Lane Solar			Tye Lane - Solar Farm	50	pre-construction			PV						EDF Renewables		52.0838	1.0771	approximate	Bramford	Suffolk	Eastern	England	https://gem.wiki/Tye_Lane_Solar	L806222	G807153	FR0010242511	1	50	50	-99	40	80	120
solar	South Africa	Africa	Sub-Saharan Africa	Umoyilanga Energy Project solar farm				138	pre-construction			PV						EDF Renewables		-28.4414	21.168	exact	Upington	ZF Mgcawu District Municipality		Northern Cape	https://gem.wiki/Umoyilanga_Energy_Project_solar_farm	L811673	G814231	FR0010242511	1	138	138	-99	40	80	120
solar	United States	Americas	Northern America	Valentine Solar				111	operating	2019		PV						EDF Renewables		34.9042	-118.384	exact		Kern County		California	https://gem.wiki/Valentine_Solar	L804436	G805099	FR0010242511	1	111	111	5	2059	2099	2139
solar	Canada	Americas	Northern America	Vulcan Solar	1			55	pre-construction	2025		PV						EDF Renewables		50.0992	-112.848	exact		Lethbridge County		Alberta	https://gem.wiki/Vulcan_Solar	L804423	G805078	FR0010242511	1	78		-1	2065	2105	2145
solar	Canada	Americas	Northern America	Vulcan Solar	2			23	pre-construction	2025		PV						EDF Renewables		50.0992	-112.848	exact		Lethbridge County		Alberta	https://gem.wiki/Vulcan_Solar	L804423	G805079	FR0010242511	1	78	78	-1	2065	2105	2145
solar	United States	Americas	Northern America	Wayland Solar				120	announced	2026		PV						EDF Renewables		42.5644	-77.6261	approximate		Steuben County		New York	https://gem.wiki/Wayland_Solar	L808550	G810794	FR0010242511	1	120	120	-2	2066	2106	2146
solar	Chile	Americas	Latin America and the Caribbean	Wayra solar farm	1	Parque Solar Wayra		33	pre-construction	2024		PV						EDF Renewables Chile		-25.4067	-70.4798	approximate		Provincia de Antofagasta		Antofagasta Region	https://gem.wiki/Wayra_solar_farm	L808011	G810113	FR0010242511	1	99		0	2064	2104	2144
solar	Chile	Americas	Latin America and the Caribbean	Wayra solar farm	2	Parque Solar Wayra		33	pre-construction	2024		PV						EDF Renewables Chile		-25.4067	-70.4798	approximate		Provincia de Antofagasta		Antofagasta Region	https://gem.wiki/Wayra_solar_farm	L808011	G810114	FR0010242511	1	99		0	2064	2104	2144
solar	Chile	Americas	Latin America and the Caribbean	Wayra solar farm	3	Parque Solar Wayra		33	pre-construction	2024		PV						EDF Renewables Chile		-25.4067	-70.4798	approximate		Provincia de Antofagasta		Antofagasta Region	https://gem.wiki/Wayra_solar_farm	L808011	G810115	FR0010242511	1	99	99	0	2064	2104	2144
solar	United States	Americas	Northern America	Wild Hill Solar			Blake Solar Plant	96	pre-construction	2025		PV						EDF Renewables		39.2955	-77.8783	approximate		Jefferson County		West Virginia	https://gem.wiki/Wild_Hill_Solar	L804437	G805100	FR0010242511	1	96	96	-1	2065	2105	2145
solar	Israel	Asia	Western Asia	Zmorot solar farm				50	operating	2016		PV						EDF Renewables		31.2468	34.7099	exact	Beer Sheva		Beersheba Subdistrict	South District	https://gem.wiki/Zmorot_solar_farm	L804057	G804634	FR0010242511	1	50	50	8	2056	2096	2136
wind	Greece	Europe	Southern Europe	Aetos Kakoraiika wind farm		Αετος - Κακοραιικα	Aetos, Fokida 2	23	operating	2010		onshore						EDF Renewables Greece		38.4323	22.2732	exact	Municipal Unit of Galaxidi	Regional Unit of Phocis	Central Greece	Thessaly and Central Greece	https://gem.wiki/Aetos_Kakoraiika_wind_farm	L912188	G915268	FR0010242511	1	23	23	14	2050	2090	2130
wind	France	Europe	Western Europe	Allanche wind farm	1			12	operating	2012		onshore						EDF Renewables		45.2312	2.9535	exact		Cantal		Auvergne-Rhône-Alpes	https://gem.wiki/Allanche_wind_farm	L912329	G915428	FR0010242511	1	24		12	2052	2092	2132
wind	France	Europe	Western Europe	Allanche wind farm	2			12	operating	2012		onshore						EDF Renewables		45.2312	2.9535	exact		Cantal		Auvergne-Rhône-Alpes	https://gem.wiki/Allanche_wind_farm	L912329	G923986	FR0010242511	1	24	24	12	2052	2092	2132
wind	Greece	Europe	Southern Europe	Alogomandria Mavrovouni wind farm	1	Αλογομανδρια -Μαυροβουνι	Alogomandria	11	operating	2009		onshore						EDF Renewables Greece; PPC Renewables SA (PPCR) [44.6%]		38.544	23.1331	exact		Regional Unit of Boeotia	Central Greece	Thessaly and Central Greece	https://gem.wiki/Alogomandria_Mavrovouni_wind_farm	L908352	G911049	FR0010242511	0.554	11	11	15	2049	2089	2129
wind	India	Asia	Southern Asia	Amreli (Sitac) wind farm				26	operating			onshore						Sitac RE [50%]; EDF Renewables [50%]		20.8667	70.7501	approximate			Amreli	Gujarat	https://gem.wiki/Amreli_(Sitac)_wind_farm	L900615	G900709	FR0010242511	0.5	26	26	-99	40	80	120
wind	Italy	Europe	Southern Europe	Andretta Et Bisaccia wind farm				70	operating	2007		onshore						EDF Renewables		40.4004	15.33	exact		Salerno		Campania	https://gem.wiki/Andretta_Et_Bisaccia_wind_farm	L915411	G919062	FR0010242511	1	70	70	17	2047	2087	2127
wind	Portugal	Europe	Southern Europe	Arga wind farm	1		Serra d'Arga wind farm, Parque Eólico Arga	36	operating	2008		onshore						EDF Renewables		41.8246	-8.7108	exact		Viana do Castelo			https://gem.wiki/Arga_wind_farm	L913843	G917195	FR0010242511	1	36	36	16	2048	2088	2128
wind	United States	Americas	Northern America	Atlantic Shores Offshore Wind Bight	1		OCS-A 0541, Central Bight Wind Energy Area	1284	announced			offshore hard mount						EDF Renewables; Shell Group INC		39.1941	-73.3129	approximate	New York			New York	https://gem.wiki/Atlantic_Shores_Offshore_Wind_Bight	L907694	G910355	FR0010242511	0.5	1284	1284	-99	40	80	120
wind	United States	Americas	Northern America	Atlantic Shores Offshore Wind North	1		OCS-A 0549	1182	announced			offshore hard mount						EDF Renewables; Shell Group INC		39.2785	-74.1364	approximate					https://gem.wiki/Atlantic_Shores_Offshore_Wind_North	L921920	G927232	FR0010242511	0.5	1182	1182	-99	40	80	120
wind	United States	Americas	Northern America	Atlantic Shores South Wind Project	1		OCS-A 0499	1510	pre-construction	2027		offshore hard mount						Shell Group INC; EDF Renewables		39.0954	-74.4387	approximate	Atlantic City			New Jersey	https://gem.wiki/Atlantic_Shores_South_Wind_Project	L907699	G910364	FR0010242511	0.5	2837		-3	2067	2107	2147
wind	United States	Americas	Northern America	Atlantic Shores South Wind Project	2		OCS-A 0499	1327	pre-construction			offshore hard mount						Shell Group INC; EDF Renewables		39.0954	-74.4387	approximate				New Jersey	https://gem.wiki/Atlantic_Shores_South_Wind_Project	L907699	G927233	FR0010242511	0.5	2837	2837	-99	40	80	120
wind	United States	Americas	Northern America	Avalon Wind Project	1			140	cancelled			onshore						Southern California Edison (SCE); EDF Renewables		35.3716	-117.633	approximate		Kern County		California	https://gem.wiki/Avalon_Wind_Project	L906974	G909638	FR0010242511	0.5	240		-99	40	80	120
wind	United States	Americas	Northern America	Avalon Wind Project	2			100	cancelled			onshore						Southern California Edison (SCE); EDF Renewables		35.3716	-117.633	approximate		Kern County		California	https://gem.wiki/Avalon_Wind_Project	L906974	G909388	FR0010242511	0.5	240	240	-99	40	80	120
wind	Brazil	Americas	Latin America and the Caribbean	Baixa Do Feijão wind farm	1	Parque Eólico Baixa do Feijão		30	operating	2016		onshore						EDF Renewables		-5.3698	-36.0317	exact	Jandaíra		Região Geográfica Intermediária de Natal	Rio Grande do Norte	https://gem.wiki/Baixa_Do_Feijão_wind_farm	L905155	G906688	FR0010242511	1	120		8	2056	2096	2136
wind	Brazil	Americas	Latin America and the Caribbean	Baixa Do Feijão wind farm	2	Parque Eólico Baixa do Feijão		30	operating	2016		onshore						EDF Renewables		-5.3022	-36.0381	exact	Jandaíra		Região Geográfica Intermediária de Natal	Rio Grande do Norte	https://gem.wiki/Baixa_Do_Feijão_wind_farm	L905155	G906689	FR0010242511	1	120		8	2056	2096	2136
wind	Brazil	Americas	Latin America and the Caribbean	Baixa Do Feijão wind farm	3	Parque Eólico Baixa do Feijão		30	operating	2016		onshore						EDF Renewables		-5.3449	-36.0401	exact	Jandaíra		Região Geográfica Intermediária de Natal	Rio Grande do Norte	https://gem.wiki/Baixa_Do_Feijão_wind_farm	L905155	G906690	FR0010242511	1	120		8	2056	2096	2136
wind	Brazil	Americas	Latin America and the Caribbean	Baixa Do Feijão wind farm	4	Parque Eólico Baixa do Feijão		30	operating	2016		onshore						EDF Renewables		-5.322	-36.0606	exact	Jandaíra		Região Geográfica Intermediária de Natal	Rio Grande do Norte	https://gem.wiki/Baixa_Do_Feijão_wind_farm	L905155	G906691	FR0010242511	1	120	120	8	2056	2096	2136
wind	Australia	Oceania	Australia and New Zealand	Banana Range wind farm	1			230	pre-construction	2026		onshore						EDF Renewables		-24.4368	150.329	approximate	Biloela			Queensland	https://gem.wiki/Banana_Range_wind_farm	L906077	G927813	FR0010242511	1	452		-2	2066	2106	2146
wind	Australia	Oceania	Australia and New Zealand	Banana Range wind farm	2			222	pre-construction			onshore						EDF Renewables		-24.4609	150.366	approximate				Queensland	https://gem.wiki/Banana_Range_wind_farm	L906077	G927814	FR0010242511	1	452	452	-99	40	80	120
wind	Italy	Europe	Southern Europe	Barletta wind farm				10	operating	2008		onshore						EDF Renewables Italia		41.3215	16.2869	approximate	Barletta			Apulia	https://gem.wiki/Barletta_wind_farm	L907726	G910393	FR0010242511	1	10	10	16	2048	2088	2128
wind	United Kingdom	Europe	Northern Europe	Barmoor South wind farm				14	operating	2015		onshore						EDF Renewables		55.6373	-2.0251	exact		Northumberland	North East England	England	https://gem.wiki/Barmoor_South_wind_farm	L909716	G912497	FR0010242511	1	14	14	9	2055	2095	2135
wind	United Kingdom	Europe	Northern Europe	Barmoor wind farm				12	operating	2014		onshore						EDF Renewables		55.6356	-2.0333	exact		Northumberland	North East England	England	https://gem.wiki/Barmoor_wind_farm	L912882	G916057	FR0010242511	1	12	12	10	2054	2094	2134
wind	France	Europe	Western Europe	Basse Thiérarche wind farm	Sud			24	operating	2014		onshore						EDF Renewables; Diamond Generating Europe LTD		49.9509	3.6645	exact	Iron	Aisne		Hauts-de-France	https://gem.wiki/Basse_Thiérarche_wind_farm	L912337	G915436	FR0010242511	0.5	24	24	10	2054	2094	2134
wind	France	Europe	Western Europe	Beaujolais Vert wind farm				12	operating	2022		onshore						EDF Renewables		45.9476	4.3895	exact		Rhône	Departemental constituency of Rhône	Auvergne-Rhône-Alpes	https://gem.wiki/Beaujolais_Vert_wind_farm	L908750	G911469	FR0010242511	1	12	12	2	2062	2102	2142
wind	United Kingdom	Europe	Northern Europe	Beck Burn wind farm				31	operating	2017		onshore						EDF Renewables		55.0107	-3.0263	exact	Carlisle	Cumbria County	North West England	England	https://gem.wiki/Beck_Burn_wind_farm	L910988	G916695	FR0010242511	1	31	31	7	2057	2097	2137
wind	Belgium	Europe	Western Europe	Berloz wind farm				16	operating	2015		onshore						EDF Luminus		50.6869	5.2014	exact		Waremme		Liège	https://gem.wiki/Berloz_wind_farm	L910492	G913356	FR0010242511	1	16	16	9	2055	2095	2135
wind	Belgium	Europe	Western Europe	Bièvre wind farm			Pont Mack wind farm	14	operating	2014		onshore						EDF Luminus		49.9532	5.0207	exact		Dinant		Namur	https://gem.wiki/Bièvre_wind_farm	L909816	G912602	FR0010242511	1	14	14	10	2054	2094	2134
wind	Mexico	Americas	Latin America and the Caribbean	Bii Stinu wind farm		Parque Eólico Bii Stinu	Bii Stinú	164	operating	2013		onshore						EDF Renewables		16.4566	-94.9657	approximate	La Ventosa			Oaxaca	https://gem.wiki/Bii_Stinu_wind_farm	L905150	G906679	FR0010242511	1	164	164	11	2053	2093	2133
wind	Canada	Americas	Northern America	Blackspring Ridge wind farm				299	operating	2014		onshore						Enbridge INC [50%]; EDF Renewables [50%]		50.2064	-112.914	exact		Vulcan County		Alberta	https://gem.wiki/Blackspring_Ridge_wind_farm	L907556	G910190	FR0010242511	0.5	299	299	10	2054	2094	2134
wind	United Kingdom	Europe	Northern Europe	Blyth Offshore wind farm	1		Blyth Offshore Wind Test Site, Blyth Offshore Demonstrator Limited (BODL), Blyth Demonstration Phase I	42	operating	2017		offshore hard mount						EDF Renewables		55.167	-1.3644	exact					https://gem.wiki/Blyth_Offshore_wind_farm	L914316	G917745	FR0010242511	1	100		7	2057	2097	2137
wind	United Kingdom	Europe	Northern Europe	Blyth Offshore wind farm	2		Blyth Offshore Wind Farm Phase 2 Demonstrator Project, Blyth Offshore Demonstrator Limited (BODL), Blyth Demo Phases 2 & 3	58	pre-construction			offshore floating						EDF Renewables [51%]; Vantage RE LTD; Tenaga Nasional BHD (TNB)		55.167	-1.3644	exact	Ashington				https://gem.wiki/Blyth_Offshore_wind_farm	L914316	G918867	FR0010242511	0.51	100	100	-99	40	80	120
wind	United States	Americas	Northern America	Bobcat Bluff Wind Project	1			150	retired	2012	2019	onshore						EDF Renewables		33.5036	-98.5805	exact		Archer County		Texas	https://gem.wiki/Bobcat_Bluff_Wind_Project	L907194	G909699	FR0010242511	1	312		12	2052	2092	2132
wind	United States	Americas	Northern America	Bobcat Bluff Wind Project	RP			162	operating	2019		onshore						EDF Renewables		33.5036	-98.5805	exact					https://gem.wiki/Bobcat_Bluff_Wind_Project	L907194	G927236	FR0010242511	1	312	312	5	2059	2099	2139
wind	France	Europe	Western Europe	Bois De Belfays wind farm				20	operating	2017		onshore						EDF Renewables		48.3543	7.0586	approximate	Châtas			Vosges	https://gem.wiki/Bois_De_Belfays_wind_farm	L911492	G914475	FR0010242511	1	20	20	7	2057	2097	2137
wind	France	Europe	Western Europe	Bois de Bouery wind farm				23.1	pre-construction			onshore						EDF Renewables		46.2869	1.2936	exact	Mailhac-sur-Benaize				https://gem.wiki/Bois_de_Bouery_wind_farm	L919525	G924030	FR0010242511	1	23.1	23.1	-99	40	80	120
wind	Italy	Europe	Southern Europe	Bonorva wind farm				74	operating	2011		onshore						EDF Renewables		40.3958	8.8073	exact		Sassari		Sardinia	https://gem.wiki/Bonorva_wind_farm	L915478	G919137	FR0010242511	1	74	74	13	2051	2091	2131
wind	France	Europe	Western Europe	Bouin wind farm			Côte de Jade	20	operating	2003		onshore						EDF Renewables		46.9523	-2.0537	exact		Vendée		Pays de la Loire	https://gem.wiki/Bouin_wind_farm	L911429	G914407	FR0010242511	1	20	20	21	2043	2083	2123
wind	France	Europe	Western Europe	Boulay Sud wind farm			Buchfeld wind farm	10	operating	2008		onshore						EDF Renewables		49.1714	6.5219	exact		Moselle		Grand Est	https://gem.wiki/Boulay_Sud_wind_farm	L907749	G910417	FR0010242511	1	10	10	16	2048	2088	2128
wind	United States	Americas	Northern America	Brickyard Hill Wind	1			157	announced	2024		onshore						EDF Renewables		40.3917	-95.3506	approximate				Missouri	https://gem.wiki/Brickyard_Hill_Wind	L921922	G927238	FR0010242511	1	157	157	0	2064	2104	2144
wind	France	Europe	Western Europe	Briffons wind farm				22.5	pre-construction			onshore						EDF Renewables		45.7059	2.6678	approximate	Briffons		Puy-de-Dome		https://gem.wiki/Briffons_wind_farm	L919546	G924051	FR0010242511	1	22.5	22.5	-99	40	80	120
wind	Canada	Americas	Northern America	Bull Trail wind farm				270	pre-construction	2024		onshore						EDF Renewables		49.8446	-110.28	exact		Cypress County		Alberta	https://gem.wiki/Bull_Trail_wind_farm	L916381	G920212	FR0010242511	1	270	270	0	2064	2104	2144
wind	Türkiye	Asia	Western Asia	Burgaz wind farm				14.9	operating	2007		onshore						EDF Renewables		40.3883	26.583	exact		Gelibolu		Çanakkale	https://gem.wiki/Burgaz_wind_farm	L921487	G926459	FR0010242511	1	14.9	14.9	17	2047	2087	2127
wind	United Kingdom	Europe	Northern Europe	Burnfoot Hill wind farm	1			26	operating	2010		onshore						EDF Renewables		56.2091	-3.7728	exact		Clackmannanshire		Scotland	https://gem.wiki/Burnfoot_Hill_wind_farm	L912759	G915911	FR0010242511	1	26	26	14	2050	2090	2130
wind	Chile	Americas	Latin America and the Caribbean	Cabo Leones wind farm	1	Parque Eólico Cabo Leones		116	operating	2017		onshore						Grupo Ibereólica Renovables; EDF Renewables		-28.9274	-71.4445	exact	Freirina	Provincia de Huasco	Huasco	Atacama Region	https://gem.wiki/Cabo_Leones_wind_farm	L904935	G907002	FR0010242511	0.5	321		7	2057	2097	2137
wind	Chile	Americas	Latin America and the Caribbean	Cabo Leones wind farm	2	Parque Eólico Cabo Leones		205	operating	2021		onshore						Grupo Ibereólica Renovables; EDF Renewables		-28.9768	-71.4452	exact	Freirina	Provincia de Huasco	Huasco	Atacama Region	https://gem.wiki/Cabo_Leones_wind_farm	L904935	G906058	FR0010242511	0.5	321	321	3	2061	2101	2141
wind	Italy	Europe	Southern Europe	Campidano (EDF) wind farm				70	operating	2008		onshore						EDF Renewables		39.5341	8.6002	approximate	Arbus		South Sardinia		https://gem.wiki/Campidano_(EDF)_wind_farm	L915415	G919066	FR0010242511	1	70	70	16	2048	2088	2128
wind	France	Europe	Western Europe	Canton De Bonneval wind farm				24	operating	2009		onshore						EDF Renewables		48.2222	1.5327	exact		Eure-et-Loir		Centre-Loire Valley	https://gem.wiki/Canton_De_Bonneval_wind_farm	L912354	G915454	FR0010242511	1	24	24	15	2049	2089	2129
wind	Italy	Europe	Southern Europe	Carluva wind farm				12	operating	2008		onshore						EDF Renewables Italia		40.0325	18.1837	approximate				Apulia	https://gem.wiki/Carluva_wind_farm	L908802	G911524	FR0010242511	1	12	12	16	2048	2088	2128
wind	France	Europe	Western Europe	Castanet wind farm				14	operating	2009		onshore						EDF Renewables		43.66	2.91	approximate	Castanet le Haut		Hérault		https://gem.wiki/Castanet_wind_farm	L909727	G912508	FR0010242511	1	14	14	15	2049	2089	2129
wind	France	Europe	Western Europe	Catalan wind farm				96	operating	2016		onshore						EDF Renewables		42.7171	2.7739	exact	Pézilla-la-Rivière	Pyrénées-Orientales		Occitania	https://gem.wiki/Catalan_wind_farm	L915656	G919355	FR0010242511	1	96	96	8	2056	2096	2136
wind	Brazil	Americas	Latin America and the Caribbean	Catanduba wind farm	1	Parque Eólico Catanduba		50	construction	2025		onshore						EDF Renewables		-5.3433	-36.1942	exact	Jandaíra		Região Geográfica Intermediária de Natal	Rio Grande do Norte	https://gem.wiki/Catanduba_wind_farm	L905156	G906692	FR0010242511	1	100		-1	2065	2105	2145
wind	Brazil	Americas	Latin America and the Caribbean	Catanduba wind farm	2	Parque Eólico Catanduba		50	construction	2025		onshore						EDF Renewables		-5.3785	-36.2072	exact	Jandaíra		Região Geográfica Intermediária de Natal	Rio Grande do Norte	https://gem.wiki/Catanduba_wind_farm	L905156	G906693	FR0010242511	1	100	100	-1	2065	2105	2145
wind	Portugal	Europe	Southern Europe	Centro - Candal/Coelheira wind farm	1		Parque Eólico Centro - Candal/Coelheira	40	operating	2006		onshore						EDF Renewables		40.825	-8.1401	exact	Carvalhais e Candal	Viseu			https://gem.wiki/Centro_-_Candal/Coelheira_wind_farm	L914198	G917602	FR0010242511	1	40	40	18	2046	2086	2126
wind	France	Europe	Western Europe	Champ Gorleau wind farm				23	announced			onshore						EDF Renewables		47.6606	3.9765	approximate	Massangis				https://gem.wiki/Champ_Gorleau_wind_farm	L919565	G924074	FR0010242511	1	23	23	-99	40	80	120
wind	France	Europe	Western Europe	Chemin D'Ablis wind farm				52	operating	2008		onshore						EDF Renewables		48.3322	1.8622	exact	Fresnay-l'Évêque	Eure-et-Loir		Centre-Loire Valley	https://gem.wiki/Chemin_D'Ablis_wind_farm	L915125	G918724	FR0010242511	1	52	52	16	2048	2088	2128
wind	United States	Americas	Northern America	Chestnut Flats wind farm	1			38	operating	2011		onshore						EDF Renewables		40.5203	-78.4854	exact	Logan Township	Blair County		Pennsylvania	https://gem.wiki/Chestnut_Flats_wind_farm	L906596	G908895	FR0010242511	1	38	38	13	2051	2091	2131
wind	Belgium	Europe	Western Europe	Ciney (EDF) wind farm			Sovet wind farm	20	operating	2011		onshore						EDF Luminus		50.2829	5.0551	exact		Dinant		Namur	https://gem.wiki/Ciney_(EDF)_wind_farm	L911745	G914763	FR0010242511	1	20	20	13	2051	2091	2131
wind	Italy	Europe	Southern Europe	Ciponte wind farm				10	operating	2008		onshore						EDF Renewables Italia		40.0325	18.1837	approximate				Apulia	https://gem.wiki/Ciponte_wind_farm	L907784	G910455	FR0010242511	1	10		16	2048	2088	2128
wind	France	Europe	Western Europe	Clamanges wind farm	1			10	operating	2008		onshore						EDF Renewables		48.8443	4.081	exact		Marne		Grand Est	https://gem.wiki/Clamanges_wind_farm	L907785	G910456	FR0010242511	1	10	10	16	2048	2088	2128
wind	France	Europe	Western Europe	Clanlieu wind farm				13	operating	2018		onshore						EDF Renewables		49.8399	3.6284	exact		Aisne		Hauts-de-France	https://gem.wiki/Clanlieu_wind_farm	L909669	G912446	FR0010242511	1	13	13	6	2058	2098	2138
wind	Ireland	Europe	Northern Europe	Codling wind farm				1500	pre-construction			offshore mount unknown						EDF Renewables [50%]; Fred Olsen Renewables AB [50%]		53.1001	-5.7801	approximate					https://gem.wiki/Codling_wind_farm	L916338	G920158	FR0010242511	0.5	1500	1500	-99	40	80	120
wind	United States	Americas	Northern America	Collins Wind Project	1			200	pre-construction	2028		onshore						EDF Renewables		42.4531	-78.7795	approximate					https://gem.wiki/Collins_Wind_Project	L921928	G927256	FR0010242511	1	200	200	-4	2068	2108	2148
wind	United States	Americas	Northern America	Copenhagen wind farm	1		Copenhagen Wind Farm	80	operating	2018	2043	onshore						EDF Renewables		43.8818	-75.6396	exact		Lewis County		New York	https://gem.wiki/Copenhagen_wind_farm	L906866	G909251	FR0010242511	1	80	80	6	2058	2098	2138
wind	France	Europe	Western Europe	Corbières Méditerrannée wind farm			Cambouisset	21	operating	2010		onshore						EDF Renewables		42.9952	2.9838	exact	Sigean	Aude		Occitania	https://gem.wiki/Corbières_Méditerrannée_wind_farm	L911767	G914788	FR0010242511	1	21	21	14	2050	2090	2130
wind	United Kingdom	Europe	Northern Europe	Corriemoillie wind farm				54	operating	2017		onshore						EDF Renewables		57.6687	-4.773	exact		Highland		Scotland	https://gem.wiki/Corriemoillie_wind_farm	L915173	G918781	FR0010242511	1	54	54	7	2057	2097	2137
wind	France	Europe	Western Europe	Courseulles-Sur-Mer wind farm				448	construction	2025		offshore hard mount						EDF Renewables; Enbridge		49.4694	-0.5134	approximate	Courseulles-sur-Mer		Calvados		https://gem.wiki/Courseulles-Sur-Mer_wind_farm	L916192	G919987	FR0010242511	0.5	448	448	-1	2065	2105	2145
wind	United States	Americas	Northern America	Coyote wind farm	1		Coyote Scurry	242	operating	2021		onshore						Masdar Clean Energy [50%]; EDF Renewables [50%]		32.8381	-100.877	exact		Scurry County		Texas	https://gem.wiki/Coyote_wind_farm	L907486	G910110	FR0010242511	0.5	242	242	3	2061	2101	2141
wind	France	Europe	Western Europe	Crissé wind farm				10.35	announced			onshore						EDF Renewables		48.1803	-0.0645	approximate	Crissé		Sarthe		https://gem.wiki/Crissé_wind_farm	L919608	G924119	FR0010242511	1	10.35	10.35	-99	40	80	120
wind	Canada	Americas	Northern America	Cypress (Alberta) wind farm	1			202	operating	2022		onshore						EDF Renewables; Community Ownership - Kainai Nation (Blood Tribe)		49.8038	-110.37	exact	Dunmore			Alberta	https://gem.wiki/Cypress_(Alberta)_wind_farm	L906651	G909998	FR0010242511	0.5	247		2	2062	2102	2142
wind	Canada	Americas	Northern America	Cypress (Alberta) wind farm	2			45	operating	2022		onshore						EDF Renewables; Community Ownership - Kainai Nation (Blood Tribe)		49.8038	-110.37	exact	Dunmore			Alberta	https://gem.wiki/Cypress_(Alberta)_wind_farm	L906651	G908965	FR0010242511	0.5	247	247	2	2062	2102	2142
wind	United States	Americas	Northern America	Desert Claim Wind Power Project	1			100	pre-construction			onshore						EDF Renewables		46.9941	-120.547	approximate	Ellensburg	Kittitas County		Washington	https://gem.wiki/Desert_Claim_Wind_Power_Project	L906980	G909394	FR0010242511	1	100	100	-99	40	80	120
wind	United States	Americas	Northern America	DifWind wind farm	8		DifWind Farms Ltd VII	15	retired	1987	2014	onshore						EDF Renewables		35.0506	-118.171	exact		Kern County		California	https://gem.wiki/DifWind_wind_farm	L906317	G908612	FR0010242511	1	39		37	2027	2067	2107
wind	United States	Americas	Northern America	DifWind wind farm	7		DifWind Farms Ltd VIII	24	retired	1987	2015	onshore						EDF Renewables		37.7581	-121.525	exact		San Joaquin County		California	https://gem.wiki/DifWind_wind_farm	L906317	G908770	FR0010242511	1	39	39	37	2027	2067	2107
wind	Belgium	Europe	Western Europe	Dinant Yvoir wind farm			Spontin wind farm	12	operating	2007		onshore						EDF Luminus		50.2912	4.9813	exact		Dinant		Namur	https://gem.wiki/Dinant_Yvoir_wind_farm	L908846	G911568	FR0010242511	1	12	12	17	2047	2087	2127
wind	United Kingdom	Europe	Northern Europe	Dorcas Lane wind farm				10	cancelled			onshore						EDF Renewables		51.9453	-0.7428	exact		Buckinghamshire	South East England	England	https://gem.wiki/Dorcas_Lane_wind_farm	L907813	G910485	FR0010242511	1	10	10	-99	40	80	120
wind	United Kingdom	Europe	Northern Europe	Dorenell wind farm	1		formerly Site A and B Scaut Hill	177	operating	2018		onshore						EDF Renewables		57.3509	-3.1317	exact		Moray		Scotland	https://gem.wiki/Dorenell_wind_farm	L915946	G919703	FR0010242511	1	352		6	2058	2098	2138
wind	United Kingdom	Europe	Northern Europe	Dorenell wind farm	2			175	cancelled			onshore						EDF Renewables		57.3509	-3.1317	exact		Moray		Scotland	https://gem.wiki/Dorenell_wind_farm	L915946	G919698	FR0010242511	1	352	352	-99	40	80	120
wind	Saudi Arabia	Asia	Western Asia	Dumat Al Jandal wind farm		محطة دومة الجندل لطاقة الرياح	Dumat Al Jandal Wind	400	operating	2021		onshore						EDF Renewables [51%]; Masdar Clean Energy [49%]		29.9727	39.8	approximate	Dumat Al Jandal			Al Jouf	https://gem.wiki/Dumat_Al_Jandal_wind_farm	L905938	G908119	FR0010242511	0.51	400	400	3	2061	2101	2141
wind	France	Europe	Western Europe	Dunkirk wind farm				600	pre-construction	2027		offshore hard mount						EDF Renewables		51.2525	2.2723	approximate	Dunkirk				https://gem.wiki/Dunkirk_wind_farm	L916237	G920039	FR0010242511	1	600	600	-3	2067	2107	2147
wind	Brazil	Americas	Latin America and the Caribbean	EDF Serra Do Seridó wind farm	3	Complexo Eólico EDF Serra do Seridó		44	operating	2023		onshore						EDF Renewables		-6.9689	-36.7932	exact	Junco do Seridó	Região Metropolitana de Patos	Região Geográfica Intermediária de Campina Grande	Paraíba	https://gem.wiki/EDF_Serra_Do_Seridó_wind_farm	L905144	G906652	FR0010242511	1	270		1	2063	2103	2143
wind	Brazil	Americas	Latin America and the Caribbean	EDF Serra Do Seridó wind farm	6	Complexo Eólico EDF Serra do Seridó		50	operating	2023		onshore						EDF Renewables		-6.9731	-36.8014	exact	Junco do Seridó	Região Metropolitana de Patos	Região Geográfica Intermediária de Campina Grande	Paraíba	https://gem.wiki/EDF_Serra_Do_Seridó_wind_farm	L905144	G906654	FR0010242511	1	270		1	2063	2103	2143
wind	Brazil	Americas	Latin America and the Caribbean	EDF Serra Do Seridó wind farm	7	Complexo Eólico EDF Serra do Seridó		49	operating	2023		onshore						EDF Renewables		-6.9705	-36.7457	exact	Junco do Seridó	Região Metropolitana de Patos	Região Geográfica Intermediária de Campina Grande	Paraíba	https://gem.wiki/EDF_Serra_Do_Seridó_wind_farm	L905144	G906655	FR0010242511	1	270		1	2063	2103	2143
wind	Brazil	Americas	Latin America and the Caribbean	EDF Serra Do Seridó wind farm	9	Complexo Eólico EDF Serra do Seridó		50	operating	2023		onshore						EDF Renewables		-7.0019	-36.8001	exact	Junco do Seridó	Região Metropolitana de Patos	Região Geográfica Intermediária de Campina Grande	Paraíba	https://gem.wiki/EDF_Serra_Do_Seridó_wind_farm	L905144	G906656	FR0010242511	1	270		1	2063	2103	2143
wind	Brazil	Americas	Latin America and the Caribbean	EDF Serra Do Seridó wind farm	2	Complexo Eólico EDF Serra do Seridó		33	construction	2024		onshore						EDF Renewables		-6.9697	-36.7591	exact	Junco do Seridó	Região Metropolitana de Patos	Região Geográfica Intermediária de Campina Grande	Paraíba	https://gem.wiki/EDF_Serra_Do_Seridó_wind_farm	L905144	G906651	FR0010242511	1	270		0	2064	2104	2144
wind	Brazil	Americas	Latin America and the Caribbean	EDF Serra Do Seridó wind farm	4	Complexo Eólico EDF Serra do Seridó		44	construction	2024		onshore						EDF Renewables		-6.9613	-36.7859	exact	Junco do Seridó	Região Metropolitana de Patos	Região Geográfica Intermediária de Campina Grande	Paraíba	https://gem.wiki/EDF_Serra_Do_Seridó_wind_farm	L905144	G906653	FR0010242511	1	270	270	0	2064	2104	2144
wind	Belgium	Europe	Western Europe	Eeklo wind farm				12	operating	2018		onshore						EDF Luminus		51.1967	3.559	approximate					https://gem.wiki/Eeklo_wind_farm	L909375	G912123	FR0010242511	1	12	12	6	2058	2098	2138
wind	Brazil	Americas	Latin America and the Caribbean	Elebrás Cidreira (Tramandaí) wind farm	1	Parque Eólico Elebrás Cidreira (Tramandaí)		70	operating	2011		onshore						EDF Renewables		-30.0791	-50.1721	exact	Tramandaí	Aglomeração Urbana do Litoral Norte	Região Geográfica Intermediária de Porto Alegre	Rio Grande do Sul	https://gem.wiki/Elebrás_Cidreira_(Tramandaí)_wind_farm	L905157	G906694	FR0010242511	1	70	70	13	2051	2091	2131
wind	France	Europe	Western Europe	Ersa-Rogliano wind farm				12	operating	2000		onshore						EDF Energie Nouvelles		42.9959	9.3908	approximate	Corse				https://gem.wiki/Ersa-Rogliano_wind_farm	L919641	G924152	FR0010242511	1	12	12	24	2040	2080	2120
wind	France	Europe	Western Europe	Espiers – Guilleville wind farm	Espiers			18	operating	2018		onshore						EDF Renewables		48.2268	1.831	exact		Eure-et-Loir		Centre-Loire Valley	https://gem.wiki/Espiers_–_Guilleville_wind_farm	L910966	G913885	FR0010242511	1	36		6	2058	2098	2138
wind	France	Europe	Western Europe	Espiers – Guilleville wind farm	Guillville			18	operating	2018		onshore						EDF Renewables		48.2662	1.8232	approximate	Fresnay-l'Évêque				https://gem.wiki/Espiers_–_Guilleville_wind_farm	L910966	G913983	FR0010242511	1	36	36	6	2058	2098	2138
wind	United Kingdom	Europe	Northern Europe	Fallago Rig wind farm	1			144	operating	2013		onshore						EDF Renewables		55.8313	-2.688	exact		Scottish Borders		Scotland	https://gem.wiki/Fallago_Rig_wind_farm	L914289	G919603	FR0010242511	1	185		11	2053	2093	2133
wind	United Kingdom	Europe	Northern Europe	Fallago Rig wind farm	2		Fallago Rig 2	41	cancelled			onshore						EDF Renewables		55.808	-2.4924	exact		Scottish Borders		Scotland	https://gem.wiki/Fallago_Rig_wind_farm	L914289	G917712	FR0010242511	1	185	185	-99	40	80	120
wind	France	Europe	Western Europe	Fecamp wind farm				498	construction	2023		offshore hard mount						EDF Renewables; Dong Energy; WPD		49.8447	0.2986	approximate	Fecamp				https://gem.wiki/Fecamp_wind_farm	L916211	G920009	FR0010242511	0.33	498	498	1	2063	2103	2143
wind	Belgium	Europe	Western Europe	Fernelmont 2 wind farm				11	operating	2018		onshore						EDF Luminus		50.5256	4.9271	exact		Namur		Namur	https://gem.wiki/Fernelmont_2_wind_farm	L908366	G911063	FR0010242511	1	11	11	6	2058	2098	2138
wind	France	Europe	Western Europe	Fiennes wind farm			Le Mont d'Aunay	12	operating	2009		onshore						EDF Renewables		50.8284	1.847	exact		Pas-de-Calais		Hauts-de-France	https://gem.wiki/Fiennes_wind_farm	L908614	G911320	FR0010242511	1	12	12	15	2049	2089	2129
wind	France	Europe	Western Europe	Fierville wind farm				28	operating	2009		onshore						EDF Renewables		49.0791	-0.1513	exact	Valambray	Calvados		Normandy	https://gem.wiki/Fierville_wind_farm	L913026	G916231	FR0010242511	1	28	28	15	2049	2089	2129
wind	France	Europe	Western Europe	Fitou wind farm	2			12	operating	2006		onshore						EDF Renewables		42.9003	2.9633	exact	Fitou	Aude		Occitania	https://gem.wiki/Fitou_wind_farm	L908327	G911389	FR0010242511	1	12	12	18	2046	2086	2126
wind	Belgium	Europe	Western Europe	Floreffe wind farm			Spy	16	operating	2014		onshore						EDF Luminus		50.4078	4.7085	exact		Namur		Namur	https://gem.wiki/Floreffe_wind_farm	L910695	G913586	FR0010242511	1	16	16	10	2054	2094	2134
wind	Brazil	Americas	Latin America and the Caribbean	Folha Larga Norte wind farm	Ventos de São Januário 20	Complexo Eólico Folha Larga Norte		50	operating	2020		onshore						EDF Renewables		-10.442	-40.4617	exact	Campo Formoso		Região Geográfica Intermediária de Juazeiro	Bahia	https://gem.wiki/Folha_Larga_Norte_wind_farm	L905145	G906662	FR0010242511	1	343		4	2060	2100	2140
wind	Brazil	Americas	Latin America and the Caribbean	Folha Larga Norte wind farm	Ventos de São Januário 21	Complexo Eólico Folha Larga Norte		50	operating	2020		onshore						EDF Renewables		-10.4286	-40.5069	exact	Campo Formoso		Região Geográfica Intermediária de Juazeiro	Bahia	https://gem.wiki/Folha_Larga_Norte_wind_farm	L905145	G906663	FR0010242511	1	343		4	2060	2100	2140
wind	Brazil	Americas	Latin America and the Caribbean	Folha Larga Norte wind farm	Ventos de São Januário 22	Complexo Eólico Folha Larga Norte		50	operating	2020		onshore						EDF Renewables		-10.4736	-40.524	exact	Campo Formoso		Região Geográfica Intermediária de Juazeiro	Bahia	https://gem.wiki/Folha_Larga_Norte_wind_farm	L905145	G906664	FR0010242511	1	343		4	2060	2100	2140
wind	Brazil	Americas	Latin America and the Caribbean	Folha Larga Norte wind farm	Ventos de São Januário 4	Complexo Eólico Folha Larga Norte		29	operating	2020		onshore						EDF Renewables		-10.387	-40.4589	exact	Campo Formoso		Região Geográfica Intermediária de Juazeiro	Bahia	https://gem.wiki/Folha_Larga_Norte_wind_farm	L905145	G906657	FR0010242511	1	343		4	2060	2100	2140
wind	Brazil	Americas	Latin America and the Caribbean	Folha Larga Norte wind farm	Ventos de São Januário 5	Complexo Eólico Folha Larga Norte		42	operating	2020		onshore						EDF Renewables		-10.2898	-40.4341	exact	Campo Formoso		Região Geográfica Intermediária de Juazeiro	Bahia	https://gem.wiki/Folha_Larga_Norte_wind_farm	L905145	G906658	FR0010242511	1	343		4	2060	2100	2140
wind	Brazil	Americas	Latin America and the Caribbean	Folha Larga Norte wind farm	Ventos de São Januário 10	Complexo Eólico Folha Larga Norte		42	operating	2021		onshore						EDF Renewables		-10.2651	-40.4306	exact	Campo Formoso		Região Geográfica Intermediária de Juazeiro	Bahia	https://gem.wiki/Folha_Larga_Norte_wind_farm	L905145	G906660	FR0010242511	1	343		3	2061	2101	2141
wind	Brazil	Americas	Latin America and the Caribbean	Folha Larga Norte wind farm	Ventos de São Januário 11	Complexo Eólico Folha Larga Norte		42	operating	2021		onshore						EDF Renewables		-10.2431	-40.4245	exact	Campo Formoso		Região Geográfica Intermediária de Juazeiro	Bahia	https://gem.wiki/Folha_Larga_Norte_wind_farm	L905145	G906661	FR0010242511	1	343		3	2061	2101	2141
wind	Brazil	Americas	Latin America and the Caribbean	Folha Larga Norte wind farm	Ventos de São Januário 6	Complexo Eólico Folha Larga Norte		38	operating	2021		onshore						EDF Renewables		-10.411	-40.4664	exact	Campo Formoso		Região Geográfica Intermediária de Juazeiro	Bahia	https://gem.wiki/Folha_Larga_Norte_wind_farm	L905145	G906659	FR0010242511	1	343	343	3	2061	2101	2141
wind	France	Europe	Western Europe	Fond De Fresne wind farm				10	operating	2006		onshore						EDF Renewables		49.99	1.7399	exact		Somme		Hauts-de-France	https://gem.wiki/Fond_De_Fresne_wind_farm	L907845	G910517	FR0010242511	1	10		18	2046	2086	2126
wind	France	Europe	Western Europe	Fonds-De-Fresnes wind farm				10	operating	2006		onshore						EDF Energie Nouvelles		49.5939	1.4476	approximate	Saint-Maxent				https://gem.wiki/Fonds-De-Fresnes_wind_farm	L919659	G924172	FR0010242511	1	10	10	18	2046	2086	2126
wind	Canada	Americas	Northern America	Forêt Domaniale wind farm	1			180	pre-construction	2026		onshore						EDF Renewables		46.8933	-70.3379	approximate					https://gem.wiki/Forêt_Domaniale_wind_farm	L921834	G927122	FR0010242511	1	280		-2	2066	2106	2146
wind	Canada	Americas	Northern America	Forêt Domaniale wind farm	2			100	announced	2027		onshore						EDF Renewables		46.8933	-70.3379	approximate					https://gem.wiki/Forêt_Domaniale_wind_farm	L921834	G927123	FR0010242511	1	280	280	-3	2067	2107	2147
wind	France	Europe	Western Europe	Fraïsse-Sur-Agoût wind farm				23	operating	2012		onshore						EDF Renewables		43.5926	2.7972	exact		Hérault		Occitania	https://gem.wiki/Fraïsse-Sur-Agoût_wind_farm	L912214	G915298	FR0010242511	1	23	23	12	2052	2092	2132
wind	Belgium	Europe	Western Europe	Frameries-Mons wind farm			Noirchain	22	pre-construction			onshore						Engie SA; Eneco; EDF Luminus		50.4099	3.9371	approximate					https://gem.wiki/Frameries-Mons_wind_farm	L919305	G923796	FR0010242511	0.333	22	22	-99	40	80	120
wind	Ireland	Europe	Northern Europe	Freneystown wind farm				50	announced	2028		onshore						EDF Renewables		52.6923	-7.1062	approximate	Castlewarren	County Kilkenny			https://gem.wiki/Freneystown_wind_farm	L920358	G925018	FR0010242511	1	50	50	-4	2068	2108	2148
wind	United Kingdom	Europe	Northern Europe	Garn Fach wind farm			Garn Fach - Wind Farm	110	pre-construction			onshore						EDF Renewables		52.0023	-4.8979	exact		Powys		Wales	https://gem.wiki/Garn_Fach_wind_farm	L921037	G925925	FR0010242511	1	110	110	-99	40	80	120
wind	Belgium	Europe	Western Europe	Geel West wind farm				11	operating	2019		onshore						EDF Luminus		51.1228	4.9535	exact		Turnhout		Antwerp	https://gem.wiki/Geel_West_wind_farm	L908574	G911279	FR0010242511	1	11	11	5	2059	2099	2139
wind	Belgium	Europe	Western Europe	Gent Kluizendok wind farm			Reime Kld2 Stradus	28	operating	2015		onshore						EDF Luminus		51.1555	3.7647	exact		Gent		East Flanders	https://gem.wiki/Gent_Kluizendok_wind_farm	L913084	G916298	FR0010242511	1	28	28	9	2055	2095	2135
wind	Türkiye	Asia	Western Asia	Geycek wind farm	1A			15	operating	2013		onshore						EDF Renewables		39.1237	34.4409	exact		Mucur		Kirsehir	https://gem.wiki/Geycek_wind_farm	L921541	G926533	FR0010242511	1	168		11	2053	2093	2133
wind	Türkiye	Asia	Western Asia	Geycek wind farm	1B			90	operating	2013		onshore						EDF Renewables		39.1237	34.4409	exact		Mucur		Kirsehir	https://gem.wiki/Geycek_wind_farm	L921541	G926534	FR0010242511	1	168		11	2053	2093	2133
wind	Türkiye	Asia	Western Asia	Geycek wind farm	2A			15	operating	2014		onshore						EDF Renewables		39.1237	34.4409	exact		Mucur		Kirsehir	https://gem.wiki/Geycek_wind_farm	L921541	G926535	FR0010242511	1	168		10	2054	2094	2134
wind	Türkiye	Asia	Western Asia	Geycek wind farm	2B			48	operating	2014		onshore						EDF Renewables		39.1237	34.4409	exact		Mucur		Kirsehir	https://gem.wiki/Geycek_wind_farm	L921541	G926536	FR0010242511	1	168	168	10	2054	2094	2134
wind	United States	Americas	Northern America	Glaciers Edge wind farm	1			212	operating	2019		onshore						EDF Renewables		42.8611	-95.748	exact	Larrabee	Cherokee County		Iowa	https://gem.wiki/Glaciers_Edge_wind_farm	L907453	G910051	FR0010242511	1	212	212	5	2059	2099	2139
wind	Poland	Europe	Eastern Europe	Górzyca (EDF) wind farm				24	operating	2022		onshore						EDF Renewables		52.4928	14.6515	approximate	Górzyca	Gmina Górzyca	Słubice	Lubusz Voivodeship	https://gem.wiki/Górzyca_(EDF)_wind_farm	L912400	G915505	FR0010242511	1	24	24	2	2062	2102	2142
wind	France	Europe	Western Europe	Gozeaucourt wind farm				14.4	announced			onshore						EDF Renewables		50.0613	3.0989	approximate	Gozeaucourt				https://gem.wiki/Gozeaucourt_wind_farm	L919678	G924192	FR0010242511	1	14.4	14.4	-99	40	80	120
wind	France	Europe	Western Europe	Grand Place wind farm				12	operating	2010		onshore						EDF Renewables		48.0129	-2.7447	exact		Morbihan		Brittany	https://gem.wiki/Grand_Place_wind_farm	L908919	G911646	FR0010242511	1	12	12	14	2050	2090	2130
wind	Martinique	Americas	Latin America and the Caribbean	Grand Rivière wind farm		Parque Eólico Grand Rivière	GRESS	14	operating	2019		onshore						EDF Renewables; Total Eren SA; Infagreen		14.8623	-61.1682	exact				Martinique	https://gem.wiki/Grand_Rivière_wind_farm	L905595	G907684	FR0010242511	0.33	14	14	5	2059	2099	2139
wind	United States	Americas	Northern America	Great Western wind farm	1			225	operating	2016		onshore						EDF Renewables [50%]; Alliant Energy [50%]		36.1478	-99.6299	exact		Ellis County		Oklahoma	https://gem.wiki/Great_Western_wind_farm	L907465	G910074	FR0010242511	0.5	225	225	8	2056	2096	2136
wind	China	Asia	Eastern Asia	Guangxi Qinnan District Lingmen wind farm		广西钦州市钦南区岭门风电场		155	pre-construction			onshore						EDF Renewables China Investment VI (HK) LTD		21.643	108.746	approximate	Xiniujiao Town	Qinnan District	Qinzhou	Guangxi	https://gem.wiki/Guangxi_Qinnan_District_Lingmen_wind_farm	L917511	G921710	FR0010242511	1	155	155	-99	40	80	120
wind	China	Asia	Eastern Asia	Guangxi Rongshui Akoushan wind farm		融水县阿扣山48MW风电项目		48	announced			onshore						EDF Renewables China Investment III (HK) LTD		25.069	109.252	approximate		Rongshui County	Liuzhou	Guangxi	https://gem.wiki/Guangxi_Rongshui_Akoushan_wind_farm	L917527	G921729	FR0010242511	1	48		-99	40	80	120
wind	China	Asia	Eastern Asia	Guangxi Rongshui Bangfu wind farm		融水县帮福48MW风电项目		48	announced			onshore						EDF Renewables China Investment III (HK) LTD		25.069	109.252	approximate		Rongshui County	Liuzhou	Guangxi	https://gem.wiki/Guangxi_Rongshui_Bangfu_wind_farm	L917528	G921730	FR0010242511	1	48		-99	40	80	120
wind	China	Asia	Eastern Asia	Guangxi Rongshui Gandong wind farm		柳州融水优能风力发电有限公司杆洞风电场	广西优能融水杆洞风电场	48	construction			onshore						EDF Renewables China Investment III (HK) Limited		25.5565	108.744	approximate	Gandong Township	Rongshui Miao Autonomous County	Liuzhou Municipality	Guangxi	https://gem.wiki/Guangxi_Rongshui_Gandong_wind_farm	L904524	G905576	FR0010242511	1	48	48	-99	40	80	120
wind	China	Asia	Eastern Asia	Guangxi Rongshui Motianling wind farm		摩天岭风电项目		44	operating	2020		onshore						EDF Renewables China Investment III (HK) LTD		25.239	109.083	approximate		Rongshui County	Liuzhou	Guangxi	https://gem.wiki/Guangxi_Rongshui_Motianling_wind_farm	L917531	G921733	FR0010242511	1	44	44	4	2060	2100	2140
wind	China	Asia	Eastern Asia	Guangxi Rongshui Qinlinshan wind farm		柳州融水优能风力发电有限公司庆林山风电场	优能广西融水庆林山风电场	48	construction			onshore						EDF Renewables China Investment III (HK) Limited		25.4107	108.877	exact		Rongshui Miao Autonomous County	Liuzhou Municipality	Guangxi	https://gem.wiki/Guangxi_Rongshui_Qinlinshan_wind_farm	L904525	G905577	FR0010242511	1	48		-99	40	80	120
wind	China	Asia	Eastern Asia	Guangxi Rongshui Shaping wind farm		融水县沙坪48MW风电项目		48	announced			onshore						EDF Renewables China Investment III (HK) LTD		25.069	109.252	approximate		Rongshui County	Liuzhou	Guangxi	https://gem.wiki/Guangxi_Rongshui_Shaping_wind_farm	L917532	G921734	FR0010242511	1	48		-99	40	80	120
wind	China	Asia	Eastern Asia	Guangxi Rongshui Yaogaoling wind farm		融水县尧告岭48MW风电项目		48	announced			onshore						EDF Renewables China Investment III (HK) LTD		25.069	109.252	approximate		Rongshui County	Liuzhou	Guangxi	https://gem.wiki/Guangxi_Rongshui_Yaogaoling_wind_farm	L917535	G921737	FR0010242511	1	48	48	-99	40	80	120
wind	China	Asia	Eastern Asia	Guangxi Rongshui Zishanping wind farm		梓山坪风电项目		36	operating	2020		onshore						EDF Renewables China Investment III (HK) LTD		25.239	109.083	approximate		Rongshui County	Liuzhou	Guangxi	https://gem.wiki/Guangxi_Rongshui_Zishanping_wind_farm	L917536	G921738	FR0010242511	1	36	36	4	2060	2100	2140
wind	India	Asia	Southern Asia	Gujarat (EDF) wind farm				30	pre-construction			onshore						EDF Renewables		22.7301	71.7953	approximate				Gujarat	https://gem.wiki/Gujarat_(EDF)_wind_farm	L917051	G921153	FR0010242511	1	30	30	-99	40	80	120
wind	Mexico	Americas	Latin America and the Caribbean	Gunaa Sicaru wind farm		Parque Eólico Gunaa Sicaru		302	cancelled			onshore						EDF Renewables		16.2555	-95.215	approximate			Tehuantepec	Oaxaca	https://gem.wiki/Gunaa_Sicaru_wind_farm	L905146	G906665	FR0010242511	1	302	302	-99	40	80	120
wind	United Kingdom	Europe	Northern Europe	Gwynt Glas floating offshore wind farm			Blue Wind offshore wind farm	1000	announced			offshore floating						DP Energy; EDF Renewables		51.0253	-6.5322	approximate				England	https://gem.wiki/Gwynt_Glas_floating_offshore_wind_farm	L921067	G925959	FR0010242511	0.5	1000	1000	-99	40	80	120
wind	France	Europe	Western Europe	Haut Dourdou wind farm				57	pre-construction			onshore						EDF Renewables; Arkolia Énergies		43.7235	2.933	approximate	Arnac-sur-Dourdou				https://gem.wiki/Haut_Dourdou_wind_farm	L915216	G918834	FR0010242511	0.5	57	57	-99	40	80	120
wind	Canada	Americas	Northern America	Haute-Chaudière wind farm				120	pre-construction	2026		onshore						EDF Renewables		45.5695	-70.7435	approximate					https://gem.wiki/Haute-Chaudière_wind_farm	L921838	G927129	FR0010242511	1	120	120	-2	2066	2106	2146
wind	United States	Americas	Northern America	Hawi wind farm	1		Hawi Renewable, North Kohala	11	operating	2006		onshore						EDF Renewables		20.2515	-155.851	exact		Hawaiʻi County		Hawaii	https://gem.wiki/Hawi_wind_farm	L906305	G908569	FR0010242511	1	11	11	18	2046	2086	2126
wind	United Kingdom	Europe	Northern Europe	Heathland wind farm				80	pre-construction			onshore						EDF Renewables		55.7926	-3.6526	exact		South Lanarkshire		Scotland	https://gem.wiki/Heathland_wind_farm	L915228	G918849	FR0010242511	1	80	80	-99	40	80	120
wind	Greece	Europe	Southern Europe	Hemerovigli wind farm		Ημεροβιγλι	Imerovigli	30	operating	2008		onshore						EDF Renewables Greece		38.3083	20.5172	exact	Pylaros Municipal Unit	Kefallonia Regional Unit	Ioanian Islands	Peloponnese, Western Greece and the Ionian	https://gem.wiki/Hemerovigli_wind_farm	L913270	G916511	FR0010242511	1	30	30	16	2048	2088	2128
wind	United States	Americas	Northern America	Hereford wind farm	1			200	operating	2014		onshore						EDF Renewables [50%]; BlackRock Infrastructure Investment Group [50%]		34.7486	-102.26	exact		Deaf Smith County		Texas	https://gem.wiki/Hereford_wind_farm	L907351	G909903	FR0010242511	0.5	200	200	10	2054	2094	2134
wind	United Kingdom	Europe	Northern Europe	High Wood wind farm				25	cancelled			onshore						EDF Renewables		53.9737	-0.5622	exact		East Riding of Yorkshire	Yorkshire and the Humber	England	https://gem.wiki/High_Wood_wind_farm	L912624	G915756	FR0010242511	1	25	25	-99	40	80	120
wind	United Kingdom	Europe	Northern Europe	Hirfynydd Renewable Energy Park wind farm			Hirfynydd Hybrid wind farm	50	announced			onshore						EDF Renewables		51.7314	-3.7499	approximate	Crynant	Neath Port Talbot		Wales	https://gem.wiki/Hirfynydd_Renewable_Energy_Park_wind_farm	L921100	G926004	FR0010242511	1	50	50	-99	40	80	120
wind	United Kingdom	Europe	Northern Europe	Hollow Panson wind farm				12	cancelled			onshore						EDF Renewables		50.7146	-4.3216	exact	Torridge District	Devon	South West England	England	https://gem.wiki/Hollow_Panson_wind_farm	L908958	G911687	FR0010242511	1	12	12	-99	40	80	120
wind	United States	Americas	Northern America	Hoosier wind farm	1		Hoosier Wind Project LLC	106	operating	2009		onshore						EDF Renewables [50%]; BlackRock Infrastructure Investment Group [50%]		40.6979	-87.2637	exact		Benton County		Indiana	https://gem.wiki/Hoosier_wind_farm	L907062	G909502	FR0010242511	0.5	106	106	15	2049	2089	2129
wind	Taiwan	Asia	Eastern Asia	Huanyang Offshore wind farm		環洋風場, 環洋專案, 環洋離岸風力發電計畫	Around the Ocean, Huan Yang	440	pre-construction	2027		offshore hard mount						Taiya Wind Energy CO LTD [19.9%]; EDF Renewables [80.1%]		24.0439	120.115	approximate				Changhua County	https://gem.wiki/Huanyang_Offshore_wind_farm	L916928	G921006	FR0010242511	0.801	440	440	-3	2067	2107	2147
wind	China	Asia	Eastern Asia	Hunan Lingling Liangshanqi wind farm		优能湖南零陵梁山岐风电场		100	pre-construction			onshore						Beijing Youneng Hengtong New Energy Technology CO LTD[75%]; EDF Renewables China Investment IV (HK) Limited[25%]		26.1447	111.812	exact	Youtianxu Town	Lingling District	Yongzhou	Hunan	https://gem.wiki/Hunan_Lingling_Liangshanqi_wind_farm	L918148	G922403	FR0010242511	0.25	100	100	-99	40	80	120
wind	Brazil	Americas	Latin America and the Caribbean	JAU wind farm	Aroeira	Parque Eólico JAU		33	operating	2017		onshore						EDF Renewables		-5.3387	-36.1129	exact	Jandaíra		Região Geográfica Intermediária de Natal	Rio Grande do Norte	https://gem.wiki/JAU_wind_farm	L905158	G906695	FR0010242511	1	99		7	2057	2097	2137
wind	Brazil	Americas	Latin America and the Caribbean	JAU wind farm	Jericó	Parque Eólico JAU		33	operating	2017		onshore						EDF Renewables		-5.3689	-36.0927	exact	Jandaíra		Região Geográfica Intermediária de Natal	Rio Grande do Norte	https://gem.wiki/JAU_wind_farm	L905158	G906696	FR0010242511	1	99		7	2057	2097	2137
wind	Brazil	Americas	Latin America and the Caribbean	JAU wind farm	Umbuzeiros	Parque Eólico JAU		33	operating	2018		onshore						EDF Renewables		-5.4115	-36.0834	exact	Jandaíra		Região Geográfica Intermediária de Natal	Rio Grande do Norte	https://gem.wiki/JAU_wind_farm	L905158	G906697	FR0010242511	1	99	99	6	2058	2098	2138
wind	Brazil	Americas	Latin America and the Caribbean	Jerusalém-Boqueirão wind farm	Boqueirão 1	Complexo Eólico Jerusalém-Boqueirão		42	operating	2023		onshore						EDF Renewables		-5.7031	-36.1287	exact	Lajes		Região Geográfica Intermediária de Mossoró	Rio Grande do Norte	https://gem.wiki/Jerusalém-Boqueirão_wind_farm	L905159	G906704	FR0010242511	1	259		1	2063	2103	2143
wind	Brazil	Americas	Latin America and the Caribbean	Jerusalém-Boqueirão wind farm	Boqueirão 2	Complexo Eólico Jerusalém-Boqueirão		38	operating	2023		onshore						EDF Renewables		-5.7032	-36.0649	exact	Caiçara do Rio do Vento		Região Geográfica Intermediária de Natal	Rio Grande do Norte	https://gem.wiki/Jerusalém-Boqueirão_wind_farm	L905159	G906705	FR0010242511	1	259		1	2063	2103	2143
wind	Brazil	Americas	Latin America and the Caribbean	Jerusalém-Boqueirão wind farm	Jerusalém 1	Complexo Eólico Jerusalém-Boqueirão		29	operating	2023		onshore						EDF Renewables		-5.6105	-36.1051	exact	Pedra Preta		Região Geográfica Intermediária de Natal	Rio Grande do Norte	https://gem.wiki/Jerusalém-Boqueirão_wind_farm	L905159	G906698	FR0010242511	1	259		1	2063	2103	2143
wind	Brazil	Americas	Latin America and the Caribbean	Jerusalém-Boqueirão wind farm	Jerusalém 2	Complexo Eólico Jerusalém-Boqueirão		29	operating	2023		onshore						EDF Renewables		-5.6324	-36.1107	exact	Lajes		Região Geográfica Intermediária de Mossoró	Rio Grande do Norte	https://gem.wiki/Jerusalém-Boqueirão_wind_farm	L905159	G906699	FR0010242511	1	259		1	2063	2103	2143
wind	Brazil	Americas	Latin America and the Caribbean	Jerusalém-Boqueirão wind farm	Jerusalém 3	Complexo Eólico Jerusalém-Boqueirão		29	operating	2023		onshore						EDF Renewables		-5.6513	-36.1006	exact	Lajes		Região Geográfica Intermediária de Mossoró	Rio Grande do Norte	https://gem.wiki/Jerusalém-Boqueirão_wind_farm	L905159	G906700	FR0010242511	1	259		1	2063	2103	2143
wind	Brazil	Americas	Latin America and the Caribbean	Jerusalém-Boqueirão wind farm	Jerusalém 4	Complexo Eólico Jerusalém-Boqueirão		29	operating	2023		onshore						EDF Renewables		-5.6759	-36.1018	exact	Lajes		Região Geográfica Intermediária de Mossoró	Rio Grande do Norte	https://gem.wiki/Jerusalém-Boqueirão_wind_farm	L905159	G906701	FR0010242511	1	259		1	2063	2103	2143
wind	Brazil	Americas	Latin America and the Caribbean	Jerusalém-Boqueirão wind farm	Jerusalém 5	Complexo Eólico Jerusalém-Boqueirão		29	operating	2023		onshore						EDF Renewables		-5.6789	-36.1181	exact	Lajes		Região Geográfica Intermediária de Mossoró	Rio Grande do Norte	https://gem.wiki/Jerusalém-Boqueirão_wind_farm	L905159	G906702	FR0010242511	1	259		1	2063	2103	2143
wind	Brazil	Americas	Latin America and the Caribbean	Jerusalém-Boqueirão wind farm	Jerusalém 6	Complexo Eólico Jerusalém-Boqueirão		34	operating	2023		onshore						EDF Renewables		-5.6875	-36.1244	exact	Lajes		Região Geográfica Intermediária de Mossoró	Rio Grande do Norte	https://gem.wiki/Jerusalém-Boqueirão_wind_farm	L905159	G906703	FR0010242511	1	259	259	1	2063	2103	2143
wind	Greece	Europe	Southern Europe	Kalamos wind farm	1&2	Καλαμος		10	operating	2010		onshore						EDF Renewables Greece; PPC Renewables SA (PPCR) [44.6%]		38.5192	23.0535	exact		Regional Unit of Boeotia	Central Greece	Thessaly and Central Greece	https://gem.wiki/Kalamos_wind_farm	L907927	G910603	FR0010242511	0.554	10	10	14	2050	2090	2130
wind	Belgium	Europe	Western Europe	Kallo KN wind farm			Katoen IE wind farm	19	operating			onshore						EDF Luminus		51.273	4.2857	approximate					https://gem.wiki/Kallo_KN_wind_farm	L911413	G914388	FR0010242511	1	19	19	-99	40	80	120
wind	Greece	Europe	Southern Europe	Kaloyeros wind farm		Καλογηρος		18	announced			onshore						EDF Renewables Greece		36.9729	22.7531	exact		Laconia Regional Unit	Peloponnese Region	Peloponnese, Western Greece and the Ionian	https://gem.wiki/Kaloyeros_wind_farm	L911095	G914035	FR0010242511	1	18	18	-99	40	80	120
wind	Greece	Europe	Southern Europe	Kalyva - Touba wind farm		Καλυβα - Tουμπa	Kalyva	12	operating	2007		onshore						EDF Renewables Greece		38.3348	22.872	exact		Regional Unit of Boeotia	Central Greece	Thessaly and Central Greece	https://gem.wiki/Kalyva_-_Touba_wind_farm	L908982	G911712	FR0010242511	1	12	12	17	2047	2087	2127
wind	Greece	Europe	Southern Europe	Kapsala (Kilkis Wind) wind farm		Καψαλα		17	pre-construction			onshore						EDF Renewables Greece		41.0511	22.5956	exact		Kilkis Regional Unit	Central Macedonia	Macedonia and Thrace	https://gem.wiki/Kapsala_(Kilkis_Wind)_wind_farm	L910762	G913657	FR0010242511	1	17	17	-99	40	80	120
wind	United States	Americas	Northern America	Kelly Creek wind farm	1			184	operating	2016		onshore						EDF Renewables		40.9748	-88.2359	exact		Livingston County		Illinois	https://gem.wiki/Kelly_Creek_wind_farm	L907313	G909849	FR0010242511	1	184	184	8	2056	2096	2136
wind	Ireland	Europe	Northern Europe	Kellystown wind farm				50	announced	2027		onshore						EDF Renewables		53.7109	-6.3443	approximate	Drogheda town	County Louth			https://gem.wiki/Kellystown_wind_farm	L920365	G925025	FR0010242511	1	50	50	-3	2067	2107	2147
wind	Ireland	Europe	Northern Europe	Kilsallagh wind farm				80	announced	2028		onshore						EDF Renewables		54.1168	-9.5849	approximate	Bellacorick	County Mayo			https://gem.wiki/Kilsallagh_wind_farm	L920367	G925027	FR0010242511	1	80	80	-4	2068	2108	2148
wind	United States	Americas	Northern America	King Creek wind farm	1			184	operating	2022		onshore						EDF Renewables		33.2762	-99.4466	exact		Throckmorton County		Texas	https://gem.wiki/King_Creek_wind_farm	L907314	G909850	FR0010242511	1	393		2	2062	2102	2142
wind	United States	Americas	Northern America	King Creek wind farm	2			209	operating	2022		onshore						EDF Renewables		33.2762	-99.4466	exact		Throckmorton County		Texas	https://gem.wiki/King_Creek_wind_farm	L907314	G910033	FR0010242511	1	393	393	2	2062	2102	2142
wind	Türkiye	Asia	Western Asia	Kozbeyli wind farm	1			23	operating	2012		onshore						EDF Renewables		38.7134	26.8708	exact				Izmir	https://gem.wiki/Kozbeyli_wind_farm	L921617	G926633	FR0010242511	1	36		12	2052	2092	2132
wind	Türkiye	Asia	Western Asia	Kozbeyli wind farm	Extension			13	operating			onshore						EDF Renewables		38.7134	26.8708	exact					https://gem.wiki/Kozbeyli_wind_farm	L921617	G926634	FR0010242511	1	36	36	-99	40	80	120
wind	India	Asia	Southern Asia	Kutch (Sitac) wind farm				300	operating	2022		onshore						Sitac RE [50%]; EDF Renewables [50%]		23.0949	69.6126	approximate			Kutch	Gujarat	https://gem.wiki/Kutch_(Sitac)_wind_farm	L900613	G900707	FR0010242511	0.5	300	300	2	2062	2102	2142
wind	France	Europe	Western Europe	La Grand Linault wind farm			Trayes	10	operating	2011		onshore						EDF Renewables		46.6632	-0.4886	exact		Deux-Sèvres		New Aquitaine	https://gem.wiki/La_Grand_Linault_wind_farm	L907957	G910635	FR0010242511	1	10	10	13	2051	2091	2131
wind	Mexico	Americas	Latin America and the Caribbean	La Mata - La Ventosa wind farm		Parque Eólico La Mata - La Ventosa		68	operating	2010		onshore						EDF Renewables		16.5817	-94.9488	exact		Asunción Ixtaltepec		Oaxaca	https://gem.wiki/La_Mata_-_La_Ventosa_wind_farm	L905147	G906666	FR0010242511	1	68	68	14	2050	2090	2130
wind	Canada	Americas	Northern America	La Mitis wind farm				25	operating	2014		onshore						EDF Renewables [70%]; Énergie Renouvelable de La Mitis [30%]		48.3769	-67.8354	exact	Lac-à-la-Croix	La Mitis		Quebec	https://gem.wiki/La_Mitis_wind_farm	L906496	G908780	FR0010242511	0.7	25	25	10	2054	2094	2134
wind	France	Europe	Western Europe	La Montagne Ardéchoise wind farm	1			73.5	operating	2017		onshore						EDF Renewables		44.6688	3.9969	exact			Ardeche		https://gem.wiki/La_Montagne_Ardéchoise_wind_farm	L919725	G924241	FR0010242511	1	73.5	73.5	7	2057	2097	2137
wind	France	Europe	Western Europe	La Nourais wind farm				10	operating	2007		onshore						EDF Renewables		47.4626	-1.4515	exact		Ille-et-Vilaine		Brittany	https://gem.wiki/La_Nourais_wind_farm	L907959	G910637	FR0010242511	1	10	10	17	2047	2087	2127
wind	Canada	Americas	Northern America	Lac Alfred wind farm	1			150	operating	2013		onshore						Enbridge INC [67.5%]; EDF Renewables [20%]; Community Owner - County Municipalities of La Matapedia and La Mitis [12.5%]		48.3921	-67.6795	exact		La Matapédia		Quebec	https://gem.wiki/Lac_Alfred_wind_farm	L907209	G909720	FR0010242511	0.2	300		11	2053	2093	2133
wind	Canada	Americas	Northern America	Lac Alfred wind farm	2			150	operating	2013		onshore						Enbridge INC [67.5%]; EDF Renewables [20%]; Community Owner - County Municipalities of La Matapedia and La Mitis [12.5%]		48.3921	-67.6795	exact		La Matapédia		Quebec	https://gem.wiki/Lac_Alfred_wind_farm	L907209	G909721	FR0010242511	0.2	300	300	11	2053	2093	2133
wind	Ireland	Europe	Northern Europe	Lackareagh wind farm				50	pre-construction	2026		onshore						EDF Renewables		52.8203	-8.5608	approximate	Shannaknock				https://gem.wiki/Lackareagh_wind_farm	L920369	G925029	FR0010242511	1	50	50	-2	2066	2106	2146
wind	United States	Americas	Northern America	Lakefield wind farm	1			206	operating	2011		onshore						EDF Renewables		43.6634	-95.1497	exact		Jackson County		Minnesota	https://gem.wiki/Lakefield_wind_farm	L907437	G910027	FR0010242511	1	206	206	13	2051	2091	2131
wind	United States	Americas	Northern America	Las Majadas wind farm	1			273	operating	2021		onshore						EDF Renewables [50%]; Masdar Clean Energy [50%]		26.3807	-97.5801	exact		Willacy County		Texas	https://gem.wiki/Las_Majadas_wind_farm	L907531	G910163	FR0010242511	0.5	273	273	3	2061	2101	2141
wind	United States	Americas	Northern America	Lasso wind farm	1			240	pre-construction	2026		onshore						EDF Renewables		33.2127	-98.1639	approximate		Jack County		Texas	https://gem.wiki/Lasso_wind_farm	L907484	G910107	FR0010242511	1	240	240	-2	2066	2106	2146
wind	Brazil	Americas	Latin America and the Caribbean	LDA wind farm	8	Parque Eólico LDA		43.4	pre-construction			onshore						EDF Renewables		-14.5542	-42.5986	exact				Bahia	https://gem.wiki/LDA_wind_farm	L921782	G926904	FR0010242511	1	341		-99	40	80	120
wind	Brazil	Americas	Latin America and the Caribbean	LDA wind farm	9	Parque Eólico LDA		43.4	pre-construction			onshore						EDF Renewables		-14.5675	-42.5978	exact				Bahia	https://gem.wiki/LDA_wind_farm	L921782	G926905	FR0010242511	1	341		-99	40	80	120
wind	Brazil	Americas	Latin America and the Caribbean	LDA wind farm	10	Parque Eólico LDA		43.4	pre-construction			onshore						EDF Renewables		-14.5814	-42.5982	exact				Bahia	https://gem.wiki/LDA_wind_farm	L921782	G926906	FR0010242511	1	341		-99	40	80	120
wind	Brazil	Americas	Latin America and the Caribbean	LDA wind farm	11	Parque Eólico LDA		43.4	pre-construction			onshore						EDF Renewables		-14.5684	-42.5807	exact				Bahia	https://gem.wiki/LDA_wind_farm	L921782	G926907	FR0010242511	1	341		-99	40	80	120
wind	Brazil	Americas	Latin America and the Caribbean	LDA wind farm	12	Parque Eólico LDA		49.6	pre-construction			onshore						EDF Renewables		-14.5881	-42.5842	exact				Bahia	https://gem.wiki/LDA_wind_farm	L921782	G926908	FR0010242511	1	341		-99	40	80	120
wind	Brazil	Americas	Latin America and the Caribbean	LDA wind farm	18	Parque Eólico LDA		37.2	pre-construction			onshore						EDF Renewables		-14.6034	-42.5781	exact				Bahia	https://gem.wiki/LDA_wind_farm	L921782	G926909	FR0010242511	1	341		-99	40	80	120
wind	Brazil	Americas	Latin America and the Caribbean	LDA wind farm	19	Parque Eólico LDA		43.4	pre-construction			onshore						EDF Renewables		-14.6137	-42.5748	exact				Bahia	https://gem.wiki/LDA_wind_farm	L921782	G926910	FR0010242511	1	341		-99	40	80	120
wind	Brazil	Americas	Latin America and the Caribbean	LDA wind farm	20	Parque Eólico LDA		37.2	pre-construction			onshore						EDF Renewables		-14.6266	-42.5735	exact				Bahia	https://gem.wiki/LDA_wind_farm	L921782	G926911	FR0010242511	1	341	341	-99	40	80	120
wind	Canada	Americas	Northern America	Le Granit wind farm				25	operating	2014		onshore						EDF Renewables [70%]; Énergie du Granit INC [30%]		45.6965	-70.5735	exact		Le Granit		Quebec	https://gem.wiki/Le_Granit_wind_farm	L906497	G908781	FR0010242511	0.7	25	25	10	2054	2094	2134
wind	France	Europe	Western Europe	Les Barthes wind farm			Freycenet-La-Tour	12	operating	2009		onshore						EDF Renewables		44.9412	4.0873	exact		Haute-Loire		Auvergne-Rhône-Alpes	https://gem.wiki/Les_Barthes_wind_farm	L909046	G911778	FR0010242511	1	12	12	15	2049	2089	2129
wind	France	Europe	Western Europe	Les Landes Du Tertre wind farm			La Prenessaye	10	operating	2011		onshore						EDF Renewables		48.1859	-2.6476	exact		Côtes-d'Armor		Brittany	https://gem.wiki/Les_Landes_Du_Tertre_wind_farm	L907987	G910665	FR0010242511	1	10	10	13	2051	2091	2131
wind	Belgium	Europe	Western Europe	Leuze-En-Hainaut wind farm				21	operating	2015		onshore						EDF Luminus		50.5994	3.6389	exact	Leuze	Tournai-Mouscron		Hainaut	https://gem.wiki/Leuze-En-Hainaut_wind_farm	L911778	G914800	FR0010242511	1	21	21	9	2055	2095	2135
wind	Belgium	Europe	Western Europe	Lierneux wind farm			Lambiester wind farm	19	operating	2018		onshore						EDF Luminus		50.3272	5.8267	approximate					https://gem.wiki/Lierneux_wind_farm	L911416	G914391	FR0010242511	1	19	19	6	2058	2098	2138
wind	United States	Americas	Northern America	Lincoln Valley Wind	1			300	pre-construction	2025		onshore						EDF Renewables		47.6961	-100.392	approximate					https://gem.wiki/Lincoln_Valley_Wind	L921952	G927308	FR0010242511	1	300	300	-1	2065	2105	2145
wind	United States	Americas	Northern America	Livingston wind farm	1			255	pre-construction	2025		onshore						EDF Renewables		37.6632	-88.9841	approximate				Illinois	https://gem.wiki/Livingston_wind_farm	L907519	G910148	FR0010242511	1	255	255	-1	2065	2105	2145
wind	Belgium	Europe	Western Europe	Lommel (EDF) wind farm				14	operating	2020		onshore						EDF Luminus		51.2257	5.2954	approximate					https://gem.wiki/Lommel_(EDF)_wind_farm	L909756	G912538	FR0010242511	1	14	14	4	2060	2100	2140
wind	United States	Americas	Northern America	Longhorn wind farm	1			200	operating	2015		onshore						EDF Renewables [50%]; BlackRock Infrastructure Investment Group [50%]		34.2772	-101.189	exact		Floyd County		Texas	https://gem.wiki/Longhorn_wind_farm	L907379	G909941	FR0010242511	0.5	200	200	9	2055	2095	2135
wind	France	Europe	Western Europe	Longue Epine wind farm			Doudelainville	10	operating	2006		onshore						EDF Renewables		49.9941	1.7451	exact	Fresnes-Tilloloy	Somme		Hauts-de-France	https://gem.wiki/Longue_Epine_wind_farm	L908004	G910689	FR0010242511	1	10	10	18	2046	2086	2126
wind	France	Europe	Western Europe	Longues Roies wind farm				47	operating			onshore						EDF Renewables		48.7759	4.3669	exact	Fresnes-Tilloloy	Marne		Grand Est	https://gem.wiki/Longues_Roies_wind_farm	L914648	G918130	FR0010242511	1	47	47	-99	40	80	120
wind	France	Europe	Western Europe	Longueval wind farm				10	operating	2009		onshore						EDF Renewables		49.2643	4.0376	approximate	Reims			Grand Est	https://gem.wiki/Longueval_wind_farm	L919788	G924307	FR0010242511	1	10	10	15	2049	2089	2129
wind	Canada	Americas	Northern America	Lotbinière wind farm				150	announced	2027		onshore						EDF Renewables		46.6085	-71.9019	approximate					https://gem.wiki/Lotbinière_wind_farm	L921839	G927132	FR0010242511	1	150	150	-3	2067	2107	2147
wind	France	Europe	Western Europe	Lou Paou wind farm			Chastel-Nouvel	14	operating	2006		onshore						EDF Renewables		44.5784	3.4497	exact	Monts-de-Randon	Lozère		Occitania	https://gem.wiki/Lou_Paou_wind_farm	L909937	G912737	FR0010242511	1	14	14	18	2046	2086	2126
wind	Belgium	Europe	Western Europe	Lummen wind farm			Lummen Zolder wind farm	10	operating	2014		onshore						EDF Luminus		50.9834	5.241	exact		Hasselt		Limburg	https://gem.wiki/Lummen_wind_farm	L908011	G910696	FR0010242511	1	10	10	10	2054	2094	2134
wind	Canada	Americas	Northern America	Madawaska wind farm				270	pre-construction	2026		onshore						EDF Renewables		47.4741	-68.6158	approximate					https://gem.wiki/Madawaska_wind_farm	L921840	G927133	FR0010242511	1	270	270	-2	2066	2106	2146
wind	Greece	Europe	Southern Europe	Malavria Didimon wind farm		Μαλαβρια Διδυμων	Didima, Didima EDF	36	operating	2005		onshore						EDF Renewables Greece		37.4811	23.1377	exact	Municipal Unit of Kranidi	Argolis Regional Unit	Peloponnese Region	Peloponnese, Western Greece and the Ionian	https://gem.wiki/Malavria_Didimon_wind_farm	L913910	G917268	FR0010242511	1	36	36	19	2045	2085	2125
wind	Canada	Americas	Northern America	Massif Du Sud wind farm				150	operating	2013		onshore						Enbridge INC [80%]; EDF Renewables [20%]		46.6088	-70.3881	exact		Les Etchemins		Quebec	https://gem.wiki/Massif_Du_Sud_wind_farm	L907213	G909726	FR0010242511	0.2	150	150	11	2053	2093	2133
wind	Greece	Europe	Southern Europe	Megale Petra wind farm		Μεγαλη Πετρα		35	pre-construction			onshore						EDF Renewables Greece		41.1027	22.6686	exact		Kilkis Regional Unit	Central Macedonia	Macedonia and Thrace	https://gem.wiki/Megale_Petra_wind_farm	L913832	G917184	FR0010242511	1	35	35	-99	40	80	120
wind	United States	Americas	Northern America	Milligan 1 wind farm	1		Saline Milligan	66	operating	2020		onshore						EDF Renewables		40.5274	-97.1915	exact		Saline County		Nebraska	https://gem.wiki/Milligan_1_wind_farm	L906781	G909129	FR0010242511	1	300		4	2060	2100	2140
wind	United States	Americas	Northern America	Milligan 1 wind farm	2		Saline Milligan	99	operating	2020		onshore						EDF Renewables		40.5274	-97.1915	exact		Saline County		Nebraska	https://gem.wiki/Milligan_1_wind_farm	L906781	G909373	FR0010242511	1	300		4	2060	2100	2140
wind	United States	Americas	Northern America	Milligan 1 wind farm	3		Saline Milligan	135	operating	2021		onshore						EDF Renewables		40.5144	-97.2087	exact		Saline County		Nebraska	https://gem.wiki/Milligan_1_wind_farm	L906781	G909624	FR0010242511	1	300	300	3	2061	2101	2141
wind	United States	Americas	Northern America	Milo Wind Project	1			50	operating	2016		onshore						EDF Renewables [50%]; BlackRock Infrastructure Investment Group [50%]		33.9056	-103.36	exact		Roosevelt County		New Mexico	https://gem.wiki/Milo_Wind_Project	L906672	G908992	FR0010242511	0.5	50	50	8	2056	2096	2136
wind	Italy	Europe	Southern Europe	Minervino wind farm				32	operating	2009		onshore						EDF Renewables		40.0885	18.4263	exact		Lecce		Apulia	https://gem.wiki/Minervino_wind_farm	L913531	G916825	FR0010242511	1	32	32	15	2049	2089	2129
wind	France	Europe	Western Europe	Mont Des Quatre Faux wind farm				226	pre-construction			onshore						EDF Renewables		49.5126	4.4007	approximate	Rethel				https://gem.wiki/Mont_Des_Quatre_Faux_wind_farm	L916015	G919779	FR0010242511	1	226	226	-99	40	80	120
wind	Canada	Americas	Northern America	Mont Rothery wind farm				74	operating	2015		onshore						EDF Renewables [50%]; MD1 Wind LP [50%]		48.9582	-65.4111	exact	Collines-du-Basque	La Côte-de-Gaspé		Quebec	https://gem.wiki/Mont_Rothery_wind_farm	L906818	G909178	FR0010242511	0.5	74		9	2055	2095	2135
wind	France	Europe	Western Europe	Montagne Ardéchoise wind farm				74	operating	2017		onshore						EDF Renewables		44.6674	3.9989	exact	Saint Etienne de Lugdarès	Ardèche		Auvergne-Rhône-Alpes	https://gem.wiki/Montagne_Ardéchoise_wind_farm	L915475	G919134	FR0010242511	1	74	74	7	2057	2097	2137
wind	Italy	Europe	Southern Europe	Monte Grighine wind farm				99	operating	2009		onshore						EDF Renewables		39.9041	8.5844	approximate					https://gem.wiki/Monte_Grighine_wind_farm	L915678	G919380	FR0010242511	1	99	99	15	2049	2089	2129
wind	Brazil	Americas	Latin America and the Caribbean	Monte Verde wind farm	1	Complexo Eólico Monte Verde		67	operating	2023		onshore						EDF Renewables		-5.4956	-36.1908	exact	Pedro Avelino		Região Geográfica Intermediária de Natal	Rio Grande do Norte	https://gem.wiki/Monte_Verde_wind_farm	L905160	G906706	FR0010242511	1	319		1	2063	2103	2143
wind	Brazil	Americas	Latin America and the Caribbean	Monte Verde wind farm	2	Complexo Eólico Monte Verde		67	operating	2023		onshore						EDF Renewables		-5.4594	-36.1979	exact	Pedro Avelino		Região Geográfica Intermediária de Natal	Rio Grande do Norte	https://gem.wiki/Monte_Verde_wind_farm	L905160	G906707	FR0010242511	1	319		1	2063	2103	2143
wind	Brazil	Americas	Latin America and the Caribbean	Monte Verde wind farm	3	Complexo Eólico Monte Verde		59	operating	2023		onshore						EDF Renewables		-5.4398	-36.222	exact	Lajes		Região Geográfica Intermediária de Natal	Rio Grande do Norte	https://gem.wiki/Monte_Verde_wind_farm	L905160	G906708	FR0010242511	1	319		1	2063	2103	2143
wind	Brazil	Americas	Latin America and the Caribbean	Monte Verde wind farm	4	Complexo Eólico Monte Verde		46	operating	2023		onshore						EDF Renewables		-5.4841	-36.2293	exact	Lajes		Região Geográfica Intermediária de Natal	Rio Grande do Norte	https://gem.wiki/Monte_Verde_wind_farm	L905160	G906709	FR0010242511	1	319		1	2063	2103	2143
wind	Brazil	Americas	Latin America and the Caribbean	Monte Verde wind farm	5	Complexo Eólico Monte Verde		34	operating	2023		onshore						EDF Renewables		-5.4924	-36.2553	exact	Pedro Avelino		Região Geográfica Intermediária de Natal	Rio Grande do Norte	https://gem.wiki/Monte_Verde_wind_farm	L905160	G906710	FR0010242511	1	319		1	2063	2103	2143
wind	Brazil	Americas	Latin America and the Caribbean	Monte Verde wind farm	6	Complexo Eólico Monte Verde		46	operating	2023		onshore						EDF Renewables		-5.5228	-36.2767	exact	Pedro Avelino		Região Geográfica Intermediária de Natal	Rio Grande do Norte	https://gem.wiki/Monte_Verde_wind_farm	L905160	G906711	FR0010242511	1	319	319	1	2063	2103	2143
wind	France	Europe	Western Europe	Montredon-Labessonnie wind farm			Bezan	10.25	announced			unknown						EDF Renewables		43.7243	2.3212	approximate	Montredon-Labessonnie		Tarn		https://gem.wiki/Montredon-Labessonnie_wind_farm	L919841	G924361	FR0010242511	1	10.25	10.25	-99	40	80	120
wind	India	Asia	Southern Asia	Morbi (EDF) wind farm				26	operating	2016		onshore						EDF Renewables; Sitac RE		22.8148	70.8462	approximate			Morbi	Gujarat	https://gem.wiki/Morbi_(EDF)_wind_farm	L917091	G921193	FR0010242511	0.5	26	26	8	2056	2096	2136
wind	United Kingdom	Europe	Northern Europe	Neart Na Gaoithe wind farm			Neart na Gaoithe (NNG) offshore wind farm	450	construction	2023		offshore mount unknown						EDF Renewables [50%]; Electric Supply Board (ESB) [50%]		56.2701	-2.2501	exact					https://gem.wiki/Neart_Na_Gaoithe_wind_farm	L916193	G919989	FR0010242511	0.5	450	450	1	2063	2103	2143
wind	Australia	Oceania	Australia and New Zealand	Newcastle Offshore wind farm			NOWE Project, NOW Project	3000	pre-construction	2031		offshore mount unknown						EDF Renewables		-32.8963	152.423	exact				New South Wales	https://gem.wiki/Newcastle_Offshore_wind_farm	L917277	G921433	FR0010242511	1	3000	3000	-7	2071	2111	2151
wind	Canada	Americas	Northern America	Nicolas-Riou wind farm				224	operating	2018		onshore						EDF Renewables [50%]; Régie intermunicipale de l'énergie du Bas-Saint-Laurent (RIEBSL) [33.33%]; Régie intermunicipale de l'énergie Gaspésie-Îles-de-la-Madeleine (RIEGÎM) [16.67%]		48.1901	-68.7697	exact		Rimouski-Neigette		Quebec	https://gem.wiki/Nicolas-Riou_wind_farm	L907464	G910073	FR0010242511	0.5	224	224	6	2058	2098	2138
wind	Canada	Americas	Northern America	Nicolet-Yamaska wind farm				200	announced	2027		onshore						EDF Renewables		46.134	-72.513	approximate					https://gem.wiki/Nicolet-Yamaska_wind_farm	L921843	G927136	FR0010242511	1	200	200	-3	2067	2107	2147
wind	United States	Americas	Northern America	Nobles wind farm	1			201	retired	2010	2022	onshore						Xcel Energy INC; EDF Renewables		43.7277	-95.837	exact	Wilmont	Nobles County		Minnesota	https://gem.wiki/Nobles_wind_farm	L907414	G909989	FR0010242511	0.5	402		14	2050	2090	2130
wind	United States	Americas	Northern America	Nobles wind farm	RP1			201	operating	2022		onshore						Xcel Energy INC; EDF Renewables		43.7277	-95.837	exact	Wilmont	Nobles County		Minnesota	https://gem.wiki/Nobles_wind_farm	L907414	G909990	FR0010242511	0.5	402	402	2	2062	2102	2142
wind	Italy	Europe	Southern Europe	Nurri wind farm				22	operating	2007		onshore						EDF Renewables		39.7236	9.1851	exact		Cagliari		Sardinia	https://gem.wiki/Nurri_wind_farm	L912150	G915225	FR0010242511	1	22	22	17	2047	2087	2127
wind	Belgium	Europe	Western Europe	Olen-Geel wind farm				14	operating	2014		onshore						EDF Luminus		51.1484	4.9134	exact		Turnhout		Antwerp	https://gem.wiki/Olen-Geel_wind_farm	L909764	G912546	FR0010242511	1	14	14	10	2054	2094	2134
wind	United States	Americas	Northern America	Oso Grande wind farm	1			34	operating	2020		onshore						EDF Renewables		33.102	-103.743	exact		Lea County		New Mexico	https://gem.wiki/Oso_Grande_wind_farm	L906577	G908873	FR0010242511	1	250		4	2060	2100	2140
wind	United States	Americas	Northern America	Oso Grande wind farm	2			216	operating	2020		onshore						EDF Renewables		33.102	-103.743	exact		Lea County		New Mexico	https://gem.wiki/Oso_Grande_wind_farm	L906577	G910056	FR0010242511	1	250	250	4	2060	2100	2140
wind	United States	Americas	Northern America	Oza Tanka wind farm	1			150	cancelled			onshore						EDF Renewables		43.7655	-93.9009	approximate	Barber Township	Faribault County		Minnesota	https://gem.wiki/Oza_Tanka_wind_farm	L907220	G909733	FR0010242511	1	150	150	-99	40	80	120
wind	United States	Americas	Northern America	Pacific wind farm	1			140	operating	2012		onshore						EDF Renewables		34.8996	-118.457	exact		Kern County		California	https://gem.wiki/Pacific_wind_farm	L907158	G909650	FR0010242511	1	140	140	12	2052	2092	2132
wind	Mexico	Americas	Latin America and the Caribbean	Pacifico wind farm (Mexico)		Parque Eólico Pacifico	Eoliatec del Pacifico Wind Farm, Eoliatec Istmo	160	operating	2013		onshore						EDF Renewables; Mitsui & CO		16.438	-95.0271	approximate	Juchitan de Zaragoza			Oaxaca	https://gem.wiki/Pacifico_wind_farm_(Mexico)	L905149	G906678	FR0010242511	0.5	160	160	11	2053	2093	2133
wind	France	Europe	Western Europe	Parc Du Télégraphe wind farm				14.4	operating	2021		onshore						EDF renewables		47.6926	3.8195	exact	Vermenton			Eure-Et-Loir	https://gem.wiki/Parc_Du_Télégraphe_wind_farm	L919865	G924386	FR0010242511	1	14.4	14.4	3	2061	2101	2141
wind	Poland	Europe	Eastern Europe	Parnowo wind farm				15	operating	2021		onshore						EDF Renewables		54.1633	16.0386	approximate	Parnowo	Gmina Biesiekierz	Koszalin	West Pomeranian Voivodeship	https://gem.wiki/Parnowo_wind_farm	L910337	G913180	FR0010242511	1	15	15	3	2061	2101	2141
wind	United States	Americas	Northern America	Patterson Pass wind farm	1			13	retired	1985	2014	onshore						EDF Renewables		37.706	-121.622	exact		Alameda County		California	https://gem.wiki/Patterson_Pass_wind_farm	L906331	G908596	FR0010242511	1	13	13	39	2025	2065	2105
wind	France	Europe	Western Europe	Pays D'Anglure wind farm				22	operating	2019		onshore						EDF Renewables		48.6294	3.7927	exact		Marne	Chapelle-Lasson	Grand Est	https://gem.wiki/Pays_D'Anglure_wind_farm	L911995	G915044	FR0010242511	1	22	22	5	2059	2099	2139
wind	United Kingdom	Europe	Northern Europe	Pearie Law wind farm	1			19	operating	2016		onshore						EDF Renewables		55.8205	-3.5624	exact		West Lothian		Scotland	https://gem.wiki/Pearie_Law_wind_farm	L910123	G914394	FR0010242511	1	19	19	8	2056	2096	2136
wind	Brazil	Americas	Latin America and the Caribbean	Pec Serra Do Seridó wind farm	11	Complexo Eólico PEC Serra do Seridó	EDF Serra Do Seridó	35	construction			onshore						EDF Renewables [99%]; PEC Energia [1%]		-6.975	-36.8345	exact	Santa Luzia	Região Metropolitana de Patos	Região Geográfica Intermediária de Patos	Paraíba	https://gem.wiki/Pec_Serra_Do_Seridó_wind_farm	L905438	G907306	FR0010242511	0.99	115		-99	40	80	120
wind	Brazil	Americas	Latin America and the Caribbean	Pec Serra Do Seridó wind farm	12	Complexo Eólico PEC Serra do Seridó	EDF Serra Do Seridó	42	construction			onshore						EDF Renewables [99%]; PEC Energia [1%]		-6.9517	-36.8196	exact	Santa Luzia	Região Metropolitana de Patos	Região Geográfica Intermediária de Patos	Paraíba	https://gem.wiki/Pec_Serra_Do_Seridó_wind_farm	L905438	G907307	FR0010242511	0.99	115		-99	40	80	120
wind	Brazil	Americas	Latin America and the Caribbean	Pec Serra Do Seridó wind farm	14	Complexo Eólico PEC Serra do Seridó	EDF Serra Do Seridó	38	construction			onshore						EDF Renewables [99%]; PEC Energia [1%]		-6.9333	-36.7888	exact	Junco do Seridó	Região Metropolitana de Patos	Região Geográfica Intermediária de Campina Grande	Paraíba	https://gem.wiki/Pec_Serra_Do_Seridó_wind_farm	L905438	G907308	FR0010242511	0.99	115	115	-99	40	80	120
wind	Greece	Europe	Southern Europe	Pelle wind farm		Πελλη		13	pre-construction			onshore						EDF Renewables Greece		41.0573	22.6194	exact		Kilkis Regional Unit	Central Macedonia	Macedonia and Thrace	https://gem.wiki/Pelle_wind_farm	L909684	G912462	FR0010242511	1	13	13	-99	40	80	120
wind	Canada	Americas	Northern America	Pe-Na-Koam wind farm			Pe-Na-Koyim	497	pre-construction			onshore						Kainaiwa Resources (KRI); EDF Renewables		49.6174	-112.952	approximate		Kainai/Blood Tribe Reserve		Alberta	https://gem.wiki/Pe-Na-Koam_wind_farm	L907585	G910222	FR0010242511	0.5	497	497	-99	40	80	120
wind	Guadeloupe	Americas	Latin America and the Caribbean	Petit Canal wind farm		Parque Eólico Petit Canal		12	operating	2019		onshore						EDF Renewables		16.4267	-61.4004	exact	Petit-Canal			Guadeloupe	https://gem.wiki/Petit_Canal_wind_farm	L905593	G907682	FR0010242511	1	12	12	5	2059	2099	2139
wind	South Africa	Africa	Sub-Saharan Africa	Phezukomoya wind farm				140	construction	2024		onshore						EDF Renewables		-31.2525	24.9523	exact	Umsobomvu Local Municipality	Pixley ka Seme District Municipality		Northern Cape	https://gem.wiki/Phezukomoya_wind_farm	L916638	G920677	FR0010242511	1	140	140	0	2064	2104	2144
wind	United States	Americas	Northern America	Pilot Hill wind farm	1			185	operating	2015		onshore						EDF Renewables		40.9934	-88.0799	exact		Kankakee County		Illinois	https://gem.wiki/Pilot_Hill_wind_farm	L907292	G909827	FR0010242511	1	185	185	9	2055	2095	2135
wind	India	Asia	Southern Asia	Pipartoda Jamnagar wind farm			Sitac Pipartoda wind farm	26	operating	2017		onshore						Sitac RE [50%]; EDF Renewables [50%]		22.4627	70.0763	approximate			Jamnagar	Gujarat	https://gem.wiki/Pipartoda_Jamnagar_wind_farm	L900616	G900710	FR0010242511	0.5	26	26	7	2057	2097	2137
wind	France	Europe	Western Europe	Plaine De L’Escrebieux wind farm				12	operating	2014		onshore						EDF Renewables; Diamond Generating Europe LTD		50.3919	3.0483	approximate	Lauwin-Planque		Pas-de-Calais		https://gem.wiki/Plaine_De_L’Escrebieux_wind_farm	L909176	G911915	FR0010242511	0.5	12	12	10	2054	2094	2134
wind	France	Europe	Western Europe	Plateau D'Andigny wind farm				21	operating	2014		onshore						EDF Renewables		50.0109	3.5233	exact		Aisne		Hauts-de-France	https://gem.wiki/Plateau_D'Andigny_wind_farm	L911926	G914964	FR0010242511	1	21	21	10	2054	2094	2134
wind	France	Europe	Western Europe	Pleugriffet wind farm				10	operating	2010		onshore						EDF Renewables		48.0069	-2.7367	exact		Morbihan		Brittany	https://gem.wiki/Pleugriffet_wind_farm	L908101	G910789	FR0010242511	1	10	10	14	2050	2090	2130
wind	France	Europe	Western Europe	Porte De Champagne wind farm				12	operating	2013		onshore						EDF Renewables; Portes de Champagne Community Council		48.6649	3.5534	exact		Marne		Grand Est	https://gem.wiki/Porte_De_Champagne_wind_farm	L909399	G912148	FR0010242511	0.5	12	12	11	2053	2093	2133
wind	Türkiye	Asia	Western Asia	Poyraz (Polat) wind farm	1		Poyrazgolu	58	operating	2012		onshore						EDF Renewables		39.7574	28.1174	exact		Kepsut		Balıkesir	https://gem.wiki/Poyraz_(Polat)_wind_farm	L921662	G926686	FR0010242511	1	72		12	2052	2092	2132
wind	Türkiye	Asia	Western Asia	Poyraz (Polat) wind farm	2		Poyrazgolu	14	operating	2016		onshore						EDF Renewables		39.7574	28.1174	exact		Kepsut		Balıkesir	https://gem.wiki/Poyraz_(Polat)_wind_farm	L921662	G926687	FR0010242511	1	72	72	8	2056	2096	2136
wind	France	Europe	Western Europe	Provence Grand Large wind farm			Faraman	25	construction	2023		offshore floating						EDF Renewables		43.1665	4.9709	approximate					https://gem.wiki/Provence_Grand_Large_wind_farm	L912667	G915803	FR0010242511	1	25	25	1	2063	2103	2143
wind	Greece	Europe	Southern Europe	Psaradika wind farm		Ψαραδικα		33	pre-construction			onshore						EDF Renewables Greece		41.0085	22.6112	exact		Kilkis Regional Unit	Central Macedonia	Macedonia and Thrace	https://gem.wiki/Psaradika_wind_farm	L913581	G916889	FR0010242511	1	33	33	-99	40	80	120
wind	India	Asia	Southern Asia	Raipar (Sitac) wind farm				22	operating	2017		onshore						Sitac RE [50%]; EDF Renewables [50%]		23.2233	72.6492	approximate		Raipar	Gandhinagar	Gujarat	https://gem.wiki/Raipar_(Sitac)_wind_farm	L900617	G900711	FR0010242511	0.5	22	22	7	2057	2097	2137
wind	India	Asia	Southern Asia	Rajkot (Sitac) wind farm				26	operating	2016		onshore						Sitac RE [50%]; EDF Renewables [50%]		22.3032	70.7999	approximate			Rajkot	Gujarat	https://gem.wiki/Rajkot_(Sitac)_wind_farm	L900618	G900712	FR0010242511	0.5	26		8	2056	2096	2136
wind	France	Europe	Western Europe	Rampont wind farm	2		La Haie Jolie	26	operating	2010		onshore						EDF Renewables		49.0641	5.2451	exact		Meuse		Grand Est	https://gem.wiki/Rampont_wind_farm	L909206	G915988	FR0010242511	1	26	26	14	2050	2090	2130
wind	United States	Americas	Northern America	Red Pine Wind Project	1			200	operating	2017		onshore						EDF Renewables [50%]; PGGM Infrastructure Fund [50%]		44.4273	-96.1537	exact		Lincoln County		Minnesota	https://gem.wiki/Red_Pine_Wind_Project	L907391	G909956	FR0010242511	0.5	200		7	2057	2097	2137
wind	Canada	Americas	Northern America	Red Rock wind farm				200	pre-construction	2025		onshore						EDF Renewables		49.6994	-110.861	approximate					https://gem.wiki/Red_Rock_wind_farm	L921849	G927142	FR0010242511	1	200	200	-1	2065	2105	2145
wind	United Kingdom	Europe	Northern Europe	Redhouse wind farm				12	operating	2006		onshore						EDF Renewables		52.8543	0.1587	approximate	Gedney Marsh				https://gem.wiki/Redhouse_wind_farm	L909211	G911951	FR0010242511	1	12	12	18	2046	2086	2126
wind	United States	Americas	Northern America	Redwood River Wind Project	1		Lyon County	200	cancelled			onshore						EDF Renewables		44.3689	-95.6931	approximate		Lyon County		Minnesota	https://gem.wiki/Redwood_River_Wind_Project	L917239	G921391	FR0010242511	1	200	200	-99	40	80	120
wind	Belgium	Europe	Western Europe	Rieme-Noord wind farm				10	operating	2016		onshore						EDF Luminus [80%]; EcoPower [20%]		51.0961	3.6845	approximate		Evergem	East Flanders	Flemish	https://gem.wiki/Rieme-Noord_wind_farm	L908294	G910989	FR0010242511	0.8	10	10	8	2056	2096	2136
wind	Italy	Europe	Southern Europe	Rignano Garganico wind farm				38	operating	2012		onshore						EDF Renewables		41.6759	15.5884	approximate					https://gem.wiki/Rignano_Garganico_wind_farm	L914093	G917478	FR0010242511	1	38	38	12	2052	2092	2132
wind	Canada	Americas	Northern America	Riversdale wind farm				130	pre-construction	2027		onshore						EDF Renewables		45.427	-62.9867	approximate					https://gem.wiki/Riversdale_wind_farm	L921852	G927145	FR0010242511	1	130	130	-3	2067	2107	2147
wind	Canada	Americas	Northern America	Rivière-Du-Moulin wind farm	1			150	operating	2014		onshore						EDF Renewables		47.8952	-71.0593	exact	Lac-Pikauba	Charlevoix		Quebec	https://gem.wiki/Rivière-Du-Moulin_wind_farm	L907223	G909736	FR0010242511	1	350		10	2054	2094	2134
wind	Canada	Americas	Northern America	Rivière-Du-Moulin wind farm	2			200	operating	2015		onshore						EDF Renewables		47.8952	-71.0593	exact	Lac-Pikauba	Charlevoix		Quebec	https://gem.wiki/Rivière-Du-Moulin_wind_farm	L907223	G909958	FR0010242511	1	350	350	9	2055	2095	2135
wind	United States	Americas	Northern America	Rock Falls wind farm	1			155	operating	2017		onshore						EDF Renewables [50%]; PGGM Infrastructure Fund [50%]		36.9143	-97.4168	exact		Kay County		Oklahoma	https://gem.wiki/Rock_Falls_wind_farm	L907252	G909771	FR0010242511	0.5	155	155	7	2057	2097	2137
wind	Canada	Americas	Northern America	Romney wind farm				60	operating	2019		onshore						EDF Renewables		42.4119	-82.1623	approximate		Chatham-Kent		Ontario	https://gem.wiki/Romney_wind_farm	L906750	G909089	FR0010242511	1	60	60	5	2059	2099	2139
wind	United States	Americas	Northern America	Roosevelt County wind farm (United States)	1			250	operating	2015		onshore						EDF Renewables [50%]; BlackRock Infrastructure Investment Group [50%]		33.8856	-103.436	exact		Roosevelt County		New Mexico	https://gem.wiki/Roosevelt_County_wind_farm_(United_States)	L907507	G910135	FR0010242511	0.5	250	250	9	2055	2095	2135
wind	United States	Americas	Northern America	Rose Lake Wind	1			200	cancelled			onshore						EDF Renewables		43.5186	-94.2333	approximate		Faribault County		Minnesota	https://gem.wiki/Rose_Lake_Wind	L917242	G921394	FR0010242511	1	200	200	-99	40	80	120
wind	Poland	Europe	Eastern Europe	Rzepin wind farm				58	operating	2015		onshore						EDF Renewables		52.35	14.83	approximate	Rzepin	Gmina Rzepin	Słubice County	Lubusz Voivodeship	https://gem.wiki/Rzepin_wind_farm	L915239	G918863	FR0010242511	1	58	58	9	2055	2095	2135
wind	France	Europe	Western Europe	Saint Aubin Sur Aire wind farm	1			12	operating	2007		onshore						EDF Renewables		48.7019	5.4236	exact		Meuse		Grand Est	https://gem.wiki/Saint_Aubin_Sur_Aire_wind_farm	L908648	G911359	FR0010242511	1	24		17	2047	2087	2127
wind	France	Europe	Western Europe	Saint Aubin Sur Aire wind farm	2			12	operating	2007		onshore						EDF Renewables		48.7019	5.4236	exact		Meuse		Grand Est	https://gem.wiki/Saint_Aubin_Sur_Aire_wind_farm	L908648	G911360	FR0010242511	1	24	24	17	2047	2087	2127
wind	France	Europe	Western Europe	Saint Nazaire wind farm				480	operating	2023		offshore hard mount						EDF Renewables		47.2146	-2.2724	approximate	Saint Nazaire	Lorie-Atlantique			https://gem.wiki/Saint_Nazaire_wind_farm	L916199	G919996	FR0010242511	1	480	480	1	2063	2103	2143
wind	Canada	Americas	Northern America	Saint Robert Bellarmin wind farm				80	operating	2012		onshore						EDF Renewables [50%]; Enbridge INC [50%]		45.693	-70.5636	exact		Le Granit		Quebec	https://gem.wiki/Saint_Robert_Bellarmin_wind_farm	L906882	G909268	FR0010242511	0.5	80	80	12	2052	2092	2132
wind	Réunion	Africa	Sub-Saharan Africa	Sainte-Rose wind farm				12	announced			onshore						EDF Renewables		-21.1816	55.7782	approximate					https://gem.wiki/Sainte-Rose_wind_farm	L922009	G927423	FR0010242511	1	12	12	-99	40	80	120
wind	France	Europe	Western Europe	Saint-Simon Clastres wind farm			Artemps	11	operating	2004		onshore						EDF Renewables		49.7625	3.2202	exact		Aisne		Hauts-de-France	https://gem.wiki/Saint-Simon_Clastres_wind_farm	L908515	G911216	FR0010242511	1	11	11	20	2044	2084	2124
wind	Canada	Americas	Northern America	Saint-Théophile wind farm				120	pre-construction	2026		onshore						EDF Renewables		45.9825	-70.3986	approximate					https://gem.wiki/Saint-Théophile_wind_farm	L921853	G927146	FR0010242511	1	120	120	-2	2066	2106	2146
wind	France	Europe	Western Europe	Salles-Curan wind farm				87	operating	2008		onshore						EDF Renewables		44.1633	2.8282	exact		Aveyron		Occitania	https://gem.wiki/Salles-Curan_wind_farm	L915590	G919279	FR0010242511	1	87	87	16	2048	2088	2128
wind	Türkiye	Asia	Western Asia	Samurlu wind farm	1			32	operating	2012		onshore						EDF Renewables		38.7231	27.0949	exact				Izmir	https://gem.wiki/Samurlu_wind_farm	L921671	G926699	FR0010242511	1	44		12	2052	2092	2132
wind	Türkiye	Asia	Western Asia	Samurlu wind farm	Extension			12	operating			onshore						EDF Renewables		38.7231	27.0949	exact					https://gem.wiki/Samurlu_wind_farm	L921671	G926700	FR0010242511	1	44	44	-99	40	80	120
wind	South Africa	Africa	Sub-Saharan Africa	San Kraal wind farm				140	construction	2024		onshore						EDF Renewables		-29.7853	18.4065	approximate	Nama Khoi Local Municipality	Namakwa District Municipality		Northern Cape	https://gem.wiki/San_Kraal_wind_farm	L916641	G920680	FR0010242511	1	140	140	0	2064	2104	2144
wind	Italy	Europe	Southern Europe	Sant’Agata Di Puglia (EDF) wind farm				72	operating	2007		onshore						EDF Renewables		41.1493	15.3815	exact		Foggia		Apulia	https://gem.wiki/Sant’Agata_Di_Puglia_(EDF)_wind_farm	L915454	G919113	FR0010242511	1	72	72	17	2047	2087	2127
wind	Italy	Europe	Southern Europe	Santa Luce wind farm				23	operating	2013		onshore						EDF Renewables Italia		43.4711	10.5641	exact		Pisa		Tuscany	https://gem.wiki/Santa_Luce_wind_farm	L912306	G915399	FR0010242511	1	23	23	11	2053	2093	2133
wind	Portugal	Europe	Southern Europe	São Paio wind farm	1		Cerveirenses wind farm, Parque Eólico São Paio	10	operating	2005		onshore						EDF Renewables		41.9125	-8.7113	exact		Viana do Castelo			https://gem.wiki/São_Paio_wind_farm	L908144	G910834	FR0010242511	1	10	10	19	2045	2085	2125
wind	France	Europe	Western Europe	Sauveterre wind farm				12	operating	2009		onshore						EDF Renewables		43.475	2.5501	approximate	Albine		Tarn		https://gem.wiki/Sauveterre_wind_farm	L909241	G911985	FR0010242511	1	12	12	15	2049	2089	2129
wind	Italy	Europe	Southern Europe	Serra Carpaneto 3 wind farm				16	operating	2016		onshore						EDF Renewables Italia		41.0721	15.7153	approximate				Basilicata	https://gem.wiki/Serra_Carpaneto_3_wind_farm	L910654	G913541	FR0010242511	1	16	16	8	2056	2096	2136
wind	Ireland	Europe	Northern Europe	Seskin wind farm				50	pre-construction			onshore						EDF Renewables		52.7689	-7.0609	approximate					https://gem.wiki/Seskin_wind_farm	L920379	G925039	FR0010242511	1	50	50	-99	40	80	120
wind	France	Europe	Western Europe	Seuil De Bapaume wind farm			Le Transloy	15	operating	2014		onshore						EDF Renewables; Diamond Generating Europe		50.0531	2.8908	approximate	Le Transloy		Pas-de-Calais		https://gem.wiki/Seuil_De_Bapaume_wind_farm	L910386	G913238	FR0010242511	0.5	15	15	10	2054	2094	2134
wind	Türkiye	Asia	Western Asia	Seyitali wind farm	1			30	operating	2011		onshore						EDF Renewables		38.8943	27.1737	exact				Izmir	https://gem.wiki/Seyitali_wind_farm	L921689	G926723	FR0010242511	1	30	30	13	2051	2091	2131
wind	United Kingdom	Europe	Northern Europe	Shelloch wind farm			Shelloch Wind	24	pre-construction			onshore						Force 9 Energy; EDF Renewables; Community Owned [10%]		56.097	-3.917	exact		Central			https://gem.wiki/Shelloch_wind_farm	L912523	G915645	FR0010242511	0.333	24	24	-99	40	80	120
wind	United Kingdom	Europe	Northern Europe	Sheraton wind farm				10	cancelled			onshore						EDF Renewables		54.7172	-1.3197	exact		County Durham	North East England	England	https://gem.wiki/Sheraton_wind_farm	L908171	G910862	FR0010242511	1	10	10	-99	40	80	120
wind	United States	Americas	Northern America	Shiloh Wind Project	2			150	operating	2009		onshore						EDF Renewables		38.1671	-121.766	exact	Rio Vista	Solano County		California	https://gem.wiki/Shiloh_Wind_Project	L907049	G909742	FR0010242511	1	354		15	2049	2089	2129
wind	United States	Americas	Northern America	Shiloh Wind Project	3			102	operating	2011		onshore						EDF Renewables		38.1756	-121.752	exact	Rio Vista	Solano County		California	https://gem.wiki/Shiloh_Wind_Project	L907049	G909477	FR0010242511	1	354		13	2051	2091	2131
wind	United States	Americas	Northern America	Shiloh Wind Project	4			102	operating	2012		onshore						EDF Renewables		38.141	-121.855	exact		Solano County		California	https://gem.wiki/Shiloh_Wind_Project	L907049	G909478	FR0010242511	1	354	354	12	2052	2092	2132
wind	Greece	Europe	Southern Europe	Skopies (Aktina Lakonias) wind farm		Σκοπιες	Skopies, Skopies EEN	18	operating	2010		onshore						EDF Renewables Greece		38.4437	22.7324	exact		Regional Unit of Boeotia	Central Greece	Thessaly and Central Greece	https://gem.wiki/Skopies_(Aktina_Lakonias)_wind_farm	L911236	G914196	FR0010242511	1	18	18	14	2050	2090	2130
wind	United States	Americas	Northern America	Slate Creek Wind Project	1			150	operating	2015		onshore						EDF Renewables [50%]; Axium Infrastructure [50%]		37.1133	-97.2599	exact		Sumner County		Kansas	https://gem.wiki/Slate_Creek_Wind_Project	L907227	G909743	FR0010242511	0.5	150	150	9	2055	2095	2135
wind	Poland	Europe	Eastern Europe	Smolecin wind farm				66	shelved			onshore						EDF Renewables		52.2159	19.1344	approximate				West Pomeranian Voivodeship - Wikipedia	https://gem.wiki/Smolecin_wind_farm	L915362	G919007	FR0010242511	1	66	66	-99	40	80	120
wind	Türkiye	Asia	Western Asia	Soma (Polat) wind farm	1			45	operating	2009		onshore						EDF Renewables		39.256	27.7991	exact		Kırkağaç		Manisa	https://gem.wiki/Soma_(Polat)_wind_farm	L921699	G926739	FR0010242511	1	311		15	2049	2089	2129
wind	Türkiye	Asia	Western Asia	Soma (Polat) wind farm	2			34	operating	2010		onshore						EDF Renewables		39.256	27.7991	exact		Kırkağaç		Manisa	https://gem.wiki/Soma_(Polat)_wind_farm	L921699	G926740	FR0010242511	1	311		14	2050	2090	2130
wind	Türkiye	Asia	Western Asia	Soma (Polat) wind farm	3			41	operating	2011		onshore						EDF Renewables		39.256	27.7991	exact		Kırkağaç		Manisa	https://gem.wiki/Soma_(Polat)_wind_farm	L921699	G926741	FR0010242511	1	311		13	2051	2091	2131
wind	Türkiye	Asia	Western Asia	Soma (Polat) wind farm	4			28	operating	2012		onshore						EDF Renewables		39.256	27.7991	exact		Kırkağaç		Manisa	https://gem.wiki/Soma_(Polat)_wind_farm	L921699	G926742	FR0010242511	1	311		12	2052	2092	2132
wind	Türkiye	Asia	Western Asia	Soma (Polat) wind farm	5			64	operating	2014		onshore						EDF Renewables		39.256	27.7991	exact		Kırkağaç		Manisa	https://gem.wiki/Soma_(Polat)_wind_farm	L921699	G926743	FR0010242511	1	311		10	2054	2094	2134
wind	Türkiye	Asia	Western Asia	Soma (Polat) wind farm	6			51	operating	2015		onshore						EDF Renewables		39.256	27.7991	exact		Kırkağaç		Manisa	https://gem.wiki/Soma_(Polat)_wind_farm	L921699	G926744	FR0010242511	1	311		9	2055	2095	2135
wind	Türkiye	Asia	Western Asia	Soma (Polat) wind farm	7			16	operating	2019		onshore						EDF Renewables		39.256	27.7991	exact		Kırkağaç		Manisa	https://gem.wiki/Soma_(Polat)_wind_farm	L921699	G926745	FR0010242511	1	311		5	2059	2099	2139
wind	Türkiye	Asia	Western Asia	Soma (Polat) wind farm	8			32	operating	2020		onshore						EDF Renewables		39.256	27.7991	exact		Kırkağaç		Manisa	https://gem.wiki/Soma_(Polat)_wind_farm	L921699	G926746	FR0010242511	1	311	311	4	2060	2100	2140
wind	United States	Americas	Northern America	Spearville wind farm	3			101	operating	2012		onshore						Eurus Energy [40%]; BlackRock [40%]; EDF Renewables [20%]		37.8793	-99.7922	exact		Ford County		Kansas	https://gem.wiki/Spearville_wind_farm	L906661	G909449	FR0010242511	0.2	101	101	12	2052	2092	2132
wind	United States	Americas	Northern America	Spinning Spur Wind Ranch	1		Spinning Spur Wind LLC	161	operating	2012		onshore						EDF Renewables		35.2768	-102.445	exact		Oldham County		Texas	https://gem.wiki/Spinning_Spur_Wind_Ranch	L907262	G909786	FR0010242511	1	516		12	2052	2092	2132
wind	United States	Americas	Northern America	Spinning Spur Wind Ranch	2		Spinning Spur Wind II	161	operating	2014		onshore						EDF Renewables		35.2819	-102.551	exact		Oldham County		Texas	https://gem.wiki/Spinning_Spur_Wind_Ranch	L907262	G909784	FR0010242511	1	516		10	2054	2094	2134
wind	United States	Americas	Northern America	Spinning Spur Wind Ranch	3		Spinning Spur Wind III	194	operating	2015		onshore						EDF Renewables		35.2812	-102.682	exact		Oldham County		Texas	https://gem.wiki/Spinning_Spur_Wind_Ranch	L907262	G909867	FR0010242511	1	516	516	9	2055	2095	2135
wind	Canada	Americas	Northern America	Spring Lake wind farm				200	announced	2027		onshore						EDF Renewables		49.9223	-107.42	approximate					https://gem.wiki/Spring_Lake_wind_farm	L921855	G927148	FR0010242511	1	200	200	-3	2067	2107	2147
wind	Greece	Europe	Southern Europe	St. Athanasios Drimonas Kourpes wind farm		Αγ. Αθανασιος-Δριμωνας-Κουρπες		44	pre-construction			onshore						EDF Renewables Greece		38.0676	22.0907	exact		Achaea Regional Unit	Western Greece	Peloponnese, Western Greece and the Ionian	https://gem.wiki/St._Athanasios_Drimonas_Kourpes_wind_farm	L914486	G917946	FR0010242511	1	44	44	-99	40	80	120
wind	United States	Americas	Northern America	Stoneray wind farm	1			34	operating	2018		onshore						EDF Renewables		44.0001	-96.0895	exact		Pipestone County		Minnesota	https://gem.wiki/Stoneray_wind_farm	L906578	G908875	FR0010242511	1	101		6	2058	2098	2138
wind	United States	Americas	Northern America	Stoneray wind farm	2			67	operating	2019		onshore						EDF Renewables		44.1018	-96.1211	exact		Pipestone County		Minnesota	https://gem.wiki/Stoneray_wind_farm	L906578	G909135	FR0010242511	1	101	101	5	2059	2099	2139
wind	United Kingdom	Europe	Northern Europe	Stoneton wind farm				18	cancelled			onshore						EDF Renewables		52.1768	-1.3422	exact	Stratford-on-Avon	Warwickshire	West Midlands	England	https://gem.wiki/Stoneton_wind_farm	L911249	G914209	FR0010242511	1	18	18	-99	40	80	120
wind	United Kingdom	Europe	Northern Europe	Stranoch wind farm	2		Stranoch 2	84	pre-construction			onshore						EDF Renewables		54.9995	-4.8862	exact			Dumfries and Galloway	Scotland	https://gem.wiki/Stranoch_wind_farm	L915456	G919253	FR0010242511	1	84	84	-99	40	80	120
wind	India	Asia	Southern Asia	Sukavala Amreli (Sitac) wind farm				64	operating	2017		onshore						Sitac RE [50%]; EDF Renewables [50%]		20.8667	70.7501	approximate			Amreli	Gujarat	https://gem.wiki/Sukavala_Amreli_(Sitac)_wind_farm	L900619	G900713	FR0010242511	0.5	64	64	7	2057	2097	2137
wind	Canada	Americas	Northern America	Sundance wind farm				150	pre-construction	2025		onshore						EDF Renewables		55.3667	-121.165	approximate					https://gem.wiki/Sundance_wind_farm	L921856	G927149	FR0010242511	1	150	150	-1	2065	2105	2145
wind	France	Europe	Western Europe	Taillades Sud wind farm				27	operating	2019		onshore						EDF Renewables		44.5809	3.8548	exact	Mont Lozère et Goulet	Lozère		Occitania	https://gem.wiki/Taillades_Sud_wind_farm	L912960	G916155	FR0010242511	1	27	27	5	2059	2099	2139
wind	Canada	Americas	Northern America	Taylor wind farm				250	pre-construction	2025		onshore						EDF Renewables		56.0174	-120.675	approximate					https://gem.wiki/Taylor_wind_farm	L921857	G927150	FR0010242511	1	250	250	-1	2065	2105	2145
wind	Belgium	Europe	Western Europe	Tessenderlo wind farm				14	operating	2015		onshore						EDF Luminus		51.0723	5.1656	exact		Hasselt		Limburg	https://gem.wiki/Tessenderlo_wind_farm	L910091	G912910	FR0010242511	1	14	14	9	2055	2095	2135
wind	Greece	Europe	Southern Europe	Thorakas wind farm	1	Θωρακας		22	announced			onshore						EDF Renewables Greece		41.2652	25.6199	exact		Rodopi Regional Unit	Eastern Macedonia and Thrace	Macedonia and Thrace	https://gem.wiki/Thorakas_wind_farm	L911947	G915053	FR0010242511	1	22	22	-99	40	80	120
wind	Belgium	Europe	Western Europe	Tinlot wind farm				10	operating	2020		onshore						EDF Luminus		50.4684	5.37	exact		Huy		Liège	https://gem.wiki/Tinlot_wind_farm	L908324	G911019	FR0010242511	1	10	10	4	2060	2100	2140
wind	Belgium	Europe	Western Europe	Tournai wind farm				18	operating	2017		onshore						EDF Luminus		50.5687	3.4051	exact		Tournai-Mouscron		Hainaut	https://gem.wiki/Tournai_wind_farm	L910964	G913883	FR0010242511	1	18	18	7	2057	2097	2137
wind	Greece	Europe	Southern Europe	Trikorpho (EDF) wind farm		Τρικορφο	Lafkos Trikofor	24	operating	2011		onshore						EDF Renewables Greece		38.4253	22.0413	exact	Municipal Unit of Efpalio	Regional Unit of Phocis	Central Greece	Thessaly and Central Greece	https://gem.wiki/Trikorpho_(EDF)_wind_farm	L912537	G915660	FR0010242511	1	24	24	13	2051	2091	2131
wind	France	Europe	Western Europe	Trois Évêques wind farm				12	operating	2008		onshore						EDF Renewables		43.4348	2.5716	exact	Sauveterre	Tarn		Occitania	https://gem.wiki/Trois_Évêques_wind_farm	L909301	G912045	FR0010242511	1	12	12	16	2048	2088	2128
wind	France	Europe	Western Europe	Trois Sources wind farm			St Florentin, Bonnet Meuse	36	operating	2007		onshore						EDF Renewables		48.536	5.4095	exact		Meuse		Grand Est	https://gem.wiki/Trois_Sources_wind_farm	L913949	G917315	FR0010242511	1	36	36	17	2047	2087	2127
wind	United Kingdom	Europe	Northern Europe	Troston Loch wind farm				67	pre-construction			onshore						EDF Renewables		55.1877	-4.0675	exact			Dumfries and Galloway	Scotland	https://gem.wiki/Troston_Loch_wind_farm	L915382	G919029	FR0010242511	1	67	67	-99	40	80	120
wind	Greece	Europe	Southern Europe	Tsitome Paliopournara wind farm		Τσιτομη - Παλιοπουρναρα	Fokida 3, Tsitomi	23	operating	2010		onshore						EDF Renewables Greece		38.3861	22.3313	exact	Municipal Unit of Galaxidi	Regional Unit of Phocis	Central Greece	Thessaly and Central Greece	https://gem.wiki/Tsitome_Paliopournara_wind_farm	L912287	G915379	FR0010242511	1	23	23	14	2050	2090	2130
wind	United Kingdom	Europe	Northern Europe	Uisenis wind farm	1		Muaitheabhal wind farm, Uisenis/Eishken (Muaitheabhal) Wind Farm	119	pre-construction			onshore						EDF Renewables; Amec Foster Wheeler PLC		58.0271	-6.6326	exact		Western Isles		Scotland	https://gem.wiki/Uisenis_wind_farm	L912005	G919513	FR0010242511	0.5	163		-99	40	80	120
wind	United Kingdom	Europe	Northern Europe	Uisenis wind farm	East Extension		Muaitheabhal- East wind farm, Uisenis/Eishken (Muaitheabhal) (East Extension)	22	pre-construction			onshore						EDF Renewables; Amec Foster Wheeler PLC		58.0287	-6.5252	exact		Western Isles		Scotland	https://gem.wiki/Uisenis_wind_farm	L912005	G915055	FR0010242511	0.5	163		-99	40	80	120
wind	United Kingdom	Europe	Northern Europe	Uisenis wind farm	Southern Extension		Muaitheabhal - Southern wind farm, Uisenis/Eishken (Muaitheabhal) (Southern Extension)	22	pre-construction			onshore						EDF Renewables; Amec Foster Wheeler PLC		58.0057	-6.5928	exact		Western Isles		Scotland	https://gem.wiki/Uisenis_wind_farm	L912005	G915056	FR0010242511	0.5	163	163	-99	40	80	120
wind	South Africa	Africa	Sub-Saharan Africa	Umoyilanga Energy Project wind farm				77	pre-construction			onshore						EDF Renewables		-33.9962	20.7768	approximate	Hessequa Local Municipality	Garden Route District Municipality		Western Cape	https://gem.wiki/Umoyilanga_Energy_Project_wind_farm	L916647	G920686	FR0010242511	1	77	77	-99	40	80	120
wind	Canada	Americas	Northern America	Upper Afton wind farm				90	pre-construction	2027		onshore						EDF Renewables		45.5566	-61.6822	approximate					https://gem.wiki/Upper_Afton_wind_farm	L921858	G927151	FR0010242511	1	90	90	-3	2067	2107	2147
wind	Poland	Europe	Eastern Europe	Ustka (EDF) wind farm				29	shelved			onshore						EDF Renewables		54.5806	16.8619	approximate	Ustka	Gmina Ustka	Słupsk County	Pomeranian Voivodeship	https://gem.wiki/Ustka_(EDF)_wind_farm	L913153	G916381	FR0010242511	1	29	29	-99	40	80	120
wind	Italy	Europe	Southern Europe	Vallata wind farm				48	operating	2011		onshore						EDF Renewables		41.0345	15.2535	approximate	Vallata		Avellino		https://gem.wiki/Vallata_wind_farm	L914751	G918248	FR0010242511	1	48	48	13	2051	2091	2131
wind	France	Europe	Western Europe	Vallée de l’Hérault wind farm				14	operating	2014		onshore						EDF Renewables		43.5757	3.6269	approximate	Aumelas				https://gem.wiki/Vallée_de_l’Hérault_wind_farm	L920004	G924539	FR0010242511	1	14	14	10	2054	2094	2134
wind	France	Europe	Western Europe	Vent De La Javigne wind farm				15	operating	2021		onshore						EDF Renewables [50%]; Arkolia Energies [50%]		46.3147	0.4102	approximate	La Ferrière-Airoux			Vienne	https://gem.wiki/Vent_De_La_Javigne_wind_farm	L920012	G924547	FR0010242511	0.5	15	15	3	2061	2101	2141
wind	Portugal	Europe	Southern Europe	Ventominho wind farm	Corisco 1		Alto Minho wind farm, Parque Eólico Ventominho	56	operating	2007		onshore						EDF Renewables		42.0183	-8.2439	exact		Viana do Castelo			https://gem.wiki/Ventominho_wind_farm	L908219	G918830	FR0010242511	1	259		17	2047	2087	2127
wind	Portugal	Europe	Southern Europe	Ventominho wind farm	Mendoiro/Bustavade 1		Alto Minho wind farm, Parque Eólico Ventominho	26	operating	2007		onshore						EDF Renewables		42.0082	-8.4259	exact		Viana do Castelo			https://gem.wiki/Ventominho_wind_farm	L908219	G916022	FR0010242511	1	259		17	2047	2087	2127
wind	Portugal	Europe	Southern Europe	Ventominho wind farm	Corisco 2		Alto Minho wind farm, Parque Eólico Ventominho	10	operating	2008		onshore						EDF Renewables		42.0183	-8.2439	exact	Parada do Monte e Cubalhão	Viana do Castelo			https://gem.wiki/Ventominho_wind_farm	L908219	G910910	FR0010242511	1	259		16	2048	2088	2128
wind	Portugal	Europe	Southern Europe	Ventominho wind farm	Mendoiro/Bustavade 2		Alto Minho wind farm, Parque Eólico Ventominho	26	operating	2008		onshore						EDF Renewables		42.0082	-8.4259	exact		Viana do Castelo			https://gem.wiki/Ventominho_wind_farm	L908219	G916023	FR0010242511	1	259		16	2048	2088	2128
wind	Portugal	Europe	Southern Europe	Ventominho wind farm	Picos 1		Alto Minho wind farm, Parque Eólico Ventominho	22	operating	2008		onshore						EDF Renewables		42.0812	-8.2067	exact		Viana do Castelo			https://gem.wiki/Ventominho_wind_farm	L908219	G915211	FR0010242511	1	259		16	2048	2088	2128
wind	Portugal	Europe	Southern Europe	Ventominho wind farm	Picos 2		Alto Minho wind farm, Parque Eólico Ventominho	30	operating	2008		onshore						EDF Renewables		42.0812	-8.2067	exact		Viana do Castelo			https://gem.wiki/Ventominho_wind_farm	L908219	G916666	FR0010242511	1	259		16	2048	2088	2128
wind	Portugal	Europe	Southern Europe	Ventominho wind farm	Picoto / São Silvestre 1		Alto Minho wind farm, Parque Eólico Ventominho	28	operating	2008		onshore						EDF Renewables		41.9803	-8.5568	exact		Viana do Castelo			https://gem.wiki/Ventominho_wind_farm	L908219	G916291	FR0010242511	1	259		16	2048	2088	2128
wind	Portugal	Europe	Southern Europe	Ventominho wind farm	Picoto / São Silvestre 2		Alto Minho wind farm, Parque Eólico Ventominho	10	operating	2008		onshore						EDF Renewables		41.9904	-8.5685	exact	Valença	Viana do Castelo			https://gem.wiki/Ventominho_wind_farm	L908219	G910911	FR0010242511	1	259		16	2048	2088	2128
wind	Portugal	Europe	Southern Europe	Ventominho wind farm	Santo António		Alto Minho wind farm, Parque Eólico Ventominho, Santo Antonio Viana	32	operating	2008		onshore						EDF Renewables		42.0084	-8.2994	exact		Viana do Castelo			https://gem.wiki/Ventominho_wind_farm	L908219	G916852	FR0010242511	1	259		16	2048	2088	2128
wind	Portugal	Europe	Southern Europe	Ventominho wind farm	Picoto / São Silvestre 3		Alto Minho wind farm, Parque Eólico Ventominho	19	operating	2016		onshore						EDF Renewables		42.0154	-8.3456	exact		Viana do Castelo			https://gem.wiki/Ventominho_wind_farm	L908219	G914319	FR0010242511	1	259	259	8	2056	2096	2136
wind	Belgium	Europe	Western Europe	Ventori wind farm				75	pre-construction			onshore						Aspiravi; Elicio; Eneco; Limburg win(d)t; EDF Luminus		50.7812	5.5404	approximate					https://gem.wiki/Ventori_wind_farm	L919335	G923831	FR0010242511	0.2	75	75	-99	40	80	120
wind	Brazil	Americas	Latin America and the Caribbean	Ventos Da Bahia wind farm	2	Complexo Eólico Ventos da Bahia		27	operating	2017		onshore						EDF Renewables; Omega Geração		-12.0156	-41.4463	exact	Mulungu do Morro		Região Geográfica Intermediária de Irecê	Bahia	https://gem.wiki/Ventos_Da_Bahia_wind_farm	L905148	G906668	FR0010242511	0.5	367		7	2057	2097	2137
wind	Brazil	Americas	Latin America and the Caribbean	Ventos Da Bahia wind farm	4	Complexo Eólico Ventos da Bahia		12	operating	2017		onshore						EDF Renewables; Omega Geração		-11.9843	-41.4445	exact	Bonito		Região Geográfica Intermediária de Irecê	Bahia	https://gem.wiki/Ventos_Da_Bahia_wind_farm	L905148	G906670	FR0010242511	0.5	367		7	2057	2097	2137
wind	Brazil	Americas	Latin America and the Caribbean	Ventos Da Bahia wind farm	8	Complexo Eólico Ventos da Bahia		27	operating	2017		onshore						EDF Renewables; Omega Geração		-12.0324	-41.4565	exact	Mulungu do Morro		Região Geográfica Intermediária de Irecê	Bahia	https://gem.wiki/Ventos_Da_Bahia_wind_farm	L905148	G906671	FR0010242511	0.5	367		7	2057	2097	2137
wind	Brazil	Americas	Latin America and the Caribbean	Ventos Da Bahia wind farm	1	Complexo Eólico Ventos da Bahia		29	operating	2018		onshore						EDF Renewables; Omega Geração		-11.9851	-41.528	exact	Mulungu do Morro		Região Geográfica Intermediária de Irecê	Bahia	https://gem.wiki/Ventos_Da_Bahia_wind_farm	L905148	G906667	FR0010242511	0.5	367		6	2058	2098	2138
wind	Brazil	Americas	Latin America and the Caribbean	Ventos Da Bahia wind farm	3	Complexo Eólico Ventos da Bahia		31	operating	2018		onshore						EDF Renewables; Omega Geração		-11.9747	-41.5221	exact	Mulungu do Morro		Região Geográfica Intermediária de Irecê	Bahia	https://gem.wiki/Ventos_Da_Bahia_wind_farm	L905148	G906669	FR0010242511	0.5	367		6	2058	2098	2138
wind	Brazil	Americas	Latin America and the Caribbean	Ventos Da Bahia wind farm	9	Complexo Eólico Ventos da Bahia		29	operating	2018		onshore						EDF Renewables; Omega Geração		-11.9851	-41.4924	exact	Mulungu do Morro		Região Geográfica Intermediária de Irecê	Bahia	https://gem.wiki/Ventos_Da_Bahia_wind_farm	L905148	G906672	FR0010242511	0.5	367		6	2058	2098	2138
wind	Brazil	Americas	Latin America and the Caribbean	Ventos Da Bahia wind farm	18	Complexo Eólico Ventos da Bahia		29	operating	2018		onshore						EDF Renewables; Omega Geração		-12.0155	-41.4954	exact	Mulungu do Morro		Região Geográfica Intermediária de Irecê	Bahia	https://gem.wiki/Ventos_Da_Bahia_wind_farm	L905148	G906673	FR0010242511	0.5	367		6	2058	2098	2138
wind	Brazil	Americas	Latin America and the Caribbean	Ventos Da Bahia wind farm	13	Complexo Eólico Ventos da Bahia		50	operating	2022		onshore						EDF Renewables; Omega Geração		-12.1313	-41.4967	exact	Iraquara		Região Geográfica Intermediária de Feira de Santana	Bahia	https://gem.wiki/Ventos_Da_Bahia_wind_farm	L905148	G906674	FR0010242511	0.5	367		2	2062	2102	2142
wind	Brazil	Americas	Latin America and the Caribbean	Ventos Da Bahia wind farm	14	Complexo Eólico Ventos da Bahia		33	operating	2022		onshore						EDF Renewables; Omega Geração		-12.1102	-41.5068	exact			Região Geográfica Intermediária de Feira de Santana	Bahia	https://gem.wiki/Ventos_Da_Bahia_wind_farm	L905148	G906675	FR0010242511	0.5	367		2	2062	2102	2142
wind	Brazil	Americas	Latin America and the Caribbean	Ventos Da Bahia wind farm	23	Complexo Eólico Ventos da Bahia		50	operating	2022		onshore						EDF Renewables; Omega Geração		-12.0842	-41.4936	exact	Souto Soares		Região Geográfica Intermediária de Feira de Santana	Bahia	https://gem.wiki/Ventos_Da_Bahia_wind_farm	L905148	G906676	FR0010242511	0.5	367		2	2062	2102	2142
wind	Brazil	Americas	Latin America and the Caribbean	Ventos Da Bahia wind farm	27	Complexo Eólico Ventos da Bahia		50	operating	2022		onshore						EDF Renewables; Omega Geração		-12.0626	-41.4863	exact			Região Geográfica Intermediária de Irecê	Bahia	https://gem.wiki/Ventos_Da_Bahia_wind_farm	L905148	G906677	FR0010242511	0.5	367	367	2	2062	2102	2142
wind	India	Asia	Southern Asia	Verdant wind farm			Sitac Verdant wind farm	105	operating	2020		onshore						Sitac RE [50%]; EDF Renewables [50%]		20.8667	70.7501	approximate			Amreli	Gujarat	https://gem.wiki/Verdant_wind_farm	L900620	G900714	FR0010242511	0.5	105	105	4	2060	2100	2140
wind	Belgium	Europe	Western Europe	Villers 4 wind farm			Villers le Bouillet wind farm	45	operating	2019		onshore						EDF Luminus		50.5983	5.2871	exact		Huy		Liège	https://gem.wiki/Villers_4_wind_farm	L914503	G917965	FR0010242511	1	45	45	5	2059	2099	2139
wind	France	Europe	Western Europe	Villesèque wind farm				51	operating	2008		onshore						EDF Renewables		43.0178	2.8683	exact		Aude		Occitania	https://gem.wiki/Villesèque_wind_farm	L915095	G918689	FR0010242511	1	51	51	16	2048	2088	2128
wind	Greece	Europe	Southern Europe	Vrachaki wind farm		Βραχακι		39	pre-construction			onshore						EDF Renewables Greece		41.0188	22.5876	exact		Kilkis Regional Unit	Central Macedonia	Macedonia and Thrace	https://gem.wiki/Vrachaki_wind_farm	L914166	G917565	FR0010242511	1	39	39	-99	40	80	120
wind	South Africa	Africa	Sub-Saharan Africa	Waainek wind farm	1			25	operating	2016		onshore						EDF Renewables		-32.5901	26.4569	exact	Nxuba Local Municipality	Amathole District Municipality		Eastern Cape	https://gem.wiki/Waainek_wind_farm	L900013	G900015	FR0010242511	1	25	25	8	2056	2096	2136
wind	United States	Americas	Northern America	Wapsipinicon wind farm	1			100	operating	2009		onshore						EDF Renewables		43.7554	-92.6875	exact		Mower County		Minnesota	https://gem.wiki/Wapsipinicon_wind_farm	L907019	G909440	FR0010242511	1	100	100	15	2049	2089	2129
wind	Chile	Americas	Latin America and the Caribbean	Wayra wind farm (Chile)		Parque Eólico Wayra		416	pre-construction	2024		onshore						EDF Renewables		-25.4067	-70.4798	approximate		Provincia de Antofagasta		Antofagasta Region	https://gem.wiki/Wayra_wind_farm_(Chile)	L916551	G920571	FR0010242511	1	416	416	0	2064	2104	2144
wind	South Africa	Africa	Sub-Saharan Africa	Wesley-Ciskei wind farm	1			34	operating	2021		onshore						EDF Renewables		-28.8166	24.9916	approximate	Peddie			Eastern Cape Province	https://gem.wiki/Wesley-Ciskei_wind_farm	L900163	G900211	FR0010242511	1	34	34	3	2061	2101	2141
wind	Canada	Americas	Northern America	Weyburn wind farm				200	announced	2027		onshore						EDF Renewables		49.5927	-103.668	approximate					https://gem.wiki/Weyburn_wind_farm	L921861	G927154	FR0010242511	1	200	200	-3	2067	2107	2147
wind	United States	Americas	Northern America	Windthorst 2 wind farm	1			64	operating	2014		onshore						BlackRock; EDF Renewables		33.4952	-98.5001	exact		Archer County		Texas	https://gem.wiki/Windthorst_2_wind_farm	L906769	G909115	FR0010242511	0.5	64	64	10	2054	2094	2134
wind	United Kingdom	Europe	Northern Europe	Withy End wind farm				10	cancelled			onshore						EDF Renewables		51.1859	-2.9543	exact	Sedgemoor	Somerset	South West England	England	https://gem.wiki/Withy_End_wind_farm	L908244	G910937	FR0010242511	1	10		-99	40	80	120
wind	United Kingdom	Europe	Northern Europe	Withy Farm wind farm				10	cancelled			onshore						EDF Renewables		51.1898	-2.9591	exact	Sedgemoor	Somerset	South West England	England	https://gem.wiki/Withy_Farm_wind_farm	L908245	G910938	FR0010242511	1	10	10	-99	40	80	120

## Sheet: Factors
Fuel Type	Capacity factor 2021_20	Capacity factor 2022_23	CF2020	CF2021	CF2022	CF2023		EDF - annual report 2021	https://www.edf.fr/sites/groupe/files/2022-02/annual-results-2021-pr-en-20220218-v2.pdf											Column	Type	Name/abbreviation	Notes
Coal-hard	0.13698	0.0694259	0.0776455	0.196314	0.0949989	0.0438529		EDF - annual report 2022	https://www.edf.fr/sites/groupe/files/2023-02/annual-results-2022-pr-en-2023-02-17.pdf											Technology	Coal	Subcritical	Subcritical
Lignite	0	0	0	0	0	0														Technology	Coal	Supercritical	Supercritical
Oil	0.164282	0.18279	0.156601	0.171963	0.177932	0.187649														Technology	Coal	Ultra-supercritical	Ultra-supercritical
Gas	0.408271	0.343772	0.398499	0.418043	0.379479	0.308066														Technology	Coal	CFB	Circulating fluidized bed
																				Technology	Coal	IGCC	Integrated gasification combined cycle
Fuel Type	Heat rate (Btu per kWh) 2022																			Technology	Coal	Unknown	Unknown combustion technology
Coal	10689							CDP C-EU8.2d 2021												Technology	Coal	IGCC/CCS	IGCC with carbon capture and sequestration
Petroleum	11166							Energy Source Type	Nameplate capacity (MW)	Gross electricity generation (GWh)	Net electricity generation (GWh)	Absolute scope 1 emissions (metric tons CO2e)	Scope 1 emissions intensity (metric tons CO2e per GWh)							Technology	Coal	Ultra-supercritical/CCS	Ultra-supercritical with carbon capture and sequestration
Natural Gas	7740							Coal – hard	2187	3761	3531	3854161	1025							Technology	Coal	Supercritical/CCS	Supercritical with carbon capture and sequestration
Nuclear	10448							Lignite	0	0	0	0	0							Technology	Coal	Subcritical/CCS	Subcritical with carbon capture and sequestration
								Oil	3442	5185	5094	3614209	697							Technology	Coal	Unknown/CCS	Unknown combustion technology with carbon capture and sequestration
Fuel Type	Emission factors (kg of CO2 per TJ) US EIA		Fuel Type	Emission factors (kg of CO2 per TJ) IPCC2006				Gas	10765	39422	37995	18331908	465							Technology	Oil/gas	IC	internal combustion
Bituminous Coal	88374.7		Crude Oil	73300				Sustainable biomass	191	1086	835	2593145	2387							Technology	Oil/gas	CC	combined cycle
Distillate Oil	70271.4		Petroleum Coke	97500				Other biomass	0	0	0	0	0							Technology	Oil/gas	GT	gas turbine
Jet Fuel	68461		Coking Coal	94600				Waste (non-biomass)	0	0	0	0	0							Technology	Oil/gas	ICCC	internal combustion combined cycle
Kerosene	69370.9		Other Bituminous Coal	94600				Nuclear	70102	432856	409754	0	0							Technology	Oil/gas	ISCC	integrated solar combined cycle
Lignite Coal	93142.3		Sub-Bituminous Coal	96100				Fossil-fuel plants fitted with CCS	0	0	0	0	0							Technology	Oil/gas	ST	steam turbine
Municipal Solid Waste	47286.7		Lignite	101000				Geothermal	1	4.23	4.23	0	0							Technology	Oil/gas	AFC	Allam-Fetvedt Cycle
Natural Gas	50149.2		Coke	107000				Hydropower	21252	45638	45593	0	0
Petroleum Coke	96791.4		Gas/Diesel Oil	74100				Wind	7523	18340	18303	0	0
Propane Gas	59598.9		Residual Fuel Oil	77400				Solar	1617	1778	1776	0	0							Column	Type	Name/abbreviation	Definition
Refined Coal	88374.7		Natural Gas	56100				Marine	240	543	543	0	0							Fuel	Oil/gas	NG	natural gas
Residual Fuel Oil	71171.8		Natural Gas Liquids	64200				Other renewable	0	0	0	0	0							Fuel	Oil/gas	LNG	liquefied natural gas
Subbituminous Coal	92061.8		Wood / Wood Waste	112000				Other non-renewable	23	254	232	800917	3158							Fuel	Oil/gas	WSTH-NG	waste heat
Tire-Derived Fuel	81484.1		Charcoal	112000				Total	117343	548868	523661	29194339	53							Fuel	Oil/gas	BU	bioenergy - unknown
Waste Coal	88374.7		Industrial Wastes	143000																Fuel	Oil/gas	MSW	refuse (municipal and industrial wastes)
Waste Oil	70138.7		Waste Oils	73300				CDP C-CE7.4												Fuel	Oil/gas	PMW	paper mill wastes
Fuel Type	Emission factors (kg of CO2 per MMBTU) US		Fuel Type	Emission factors (kg of CO2 per MMBTU) IPCC2006				CDP C-EU8.2d 2022												Fuel	Oil/gas	LFG	refuse (landfill gas)
Bituminous Coal	93.24		Crude Oil	77.3354				Energy Source Type	Nameplate capacity (MW)	Gross electricity generation (GWh)	Net electricity generation (GWh)	Absolute scope 1 emissions (metric tons CO2e)	Scope 1 emissions intensity (metric tons CO2e per GWh)							Fuel	Oil/gas	BG	agricultural waste (biogas)
Distillate Oil	74.14		Petroleum Coke	102.868				Coal – hard	2187	1820	1701	2021760	1111							Fuel	Oil/gas	WOOD	wood & other biomass (solids)
Jet Fuel	72.23		Coking Coal	99.808				Lignite	0	0	0	0	0							Fuel	Oil/gas	BFG	blast furnace gas
Kerosene	73.19		Other Bituminous Coal	99.808				Oil	3442	5365	5259	3778130	704							Fuel	Oil/gas	COG	coke oven gas
Lignite Coal	98.27		Sub-Bituminous Coal	101.391				Gas	11393	37873	36460	17183442	454							Fuel	Oil/gas	C	coal
Municipal Solid Waste	49.89		Lignite	106.56				Sustainable biomass	214	1245	924	2293253	1841							Fuel	Oil/gas	CM	coalbed methane
Natural Gas	52.91		Coke	112.891				Other biomass	0	0	0	0	0							Fuel	Oil/gas	CR	crude oil
Petroleum Coke	102.12		Gas/Diesel Oil	78.1794				Waste (non-biomass)	0	0	0	0	0							Fuel	Oil/gas	D	diesel
Propane Gas	62.88		Residual Fuel Oil	81.6611				Nuclear	68050	347430	327956	0	0							Fuel	Oil/gas	FO	fuel oil
Refined Coal	93.24		Natural Gas	59.1885				Fossil-fuel plants fitted with CCS	0	0	0	0	0							Fuel	Oil/gas	HFO	heavy fuel oil
Residual Fuel Oil	75.09		Natural Gas Liquids	67.7344				Geothermal	1	4	4	0	0							Fuel	Oil/gas	LFO	light fuel oil
Subbituminous Coal	97.13		Wood / Wood Waste	118.166				Hydropower	21292	35033	35005	0	0							Fuel	Oil/gas	COKE	petroleum coke
Tire-Derived Fuel	85.97		Charcoal	118.166				Wind	8307	21266	21224	0	0							Fuel	Oil/gas	J	jet fuel
Waste Coal	93.24		Industrial Wastes	150.873				Solar	1750	2520	2517	0	0							Fuel	Oil/gas	LPG	liquefied petroleum gas
Waste Oil	74		Waste Oils	77.3354				Marine	240	549	549	0	0							Fuel	Oil/gas	N	naphtha
								Other renewable	0	0	0	0	0							Fuel	Oil/gas	G	gasoline
								Other non-renewable	26	129	121	94572	734							Fuel	Oil/gas	H	hydrogen
Capacity	Interval			Age	Interval			Total	116902	453202	431721	25371157	56							Fuel	Oil/gas	S	solar thermal
0	0-10	8	0.0162933	-99	NA	107														Fuel	Oil/gas	WO	waste/other oil
10	10-20	69	0.14053	-20	Future	63		https://www.epa.gov/system/files/documents/2024-02/ghg-emission-factors-hub-2024.pdf												Fuel	Oil/gas	KER	kerosene
20	20-30	48	0.0977597	0	0-10	199														Fuel	Oil/gas	PG	gaseous propane
30	30-40	19	0.0386965	10	10-20	158		https://opendata.edf.fr/explore/dataset/capacites-de-production-consolidees-du-groupe-edf/table/?disjunctive.sector&sort=-tri												Fuel	Oil/gas	OG	gas (unknown)
40	40-50	13	0.0264766	20	20-30	29		https://opendata.edf.fr/explore/?disjunctive.theme&disjunctive.publisher&disjunctive.keyword&sort=modified&refine.publisher=EDF+group&refine.theme=Production+Mix												Fuel	Oil/gas	OTH	other
50	50-60	21	0.0427699	30	30-40	51		2023	Coal	244.891	GWh	Full integration								Fuel	Coal	bituminous
60	60-70	10	0.0203666	40	40-50	54		2023	Fioul	4499.23	GWh	Full integration								Fuel	Coal	lignite
70	70-80	14	0.0285132	50	50-60	19		2023	Gas	28513.6	GWh	Full integration		33257.8						Fuel	Coal	unknown
80	80-90	10	0.0203666	60	60-70	16		2022	Coal	1700.71	GWh	Full integration								Fuel	Coal	subbituminous
90	90-100	17	0.0346232	70	70-80	14		2022	Fioul	5259.19	GWh	Full integration								Fuel	Coal	waste coal
100	100-150	59	0.120163	80	80-90	0		2022	Gas	36460	GWh	Full integration		43419.9						Fuel	Coal	anthracite
150	150-200	34	0.0692464	90	90-100	5		2021	Coal	3530.53	GWh	Full integration
200	200+	169	0.344196	100	100-150	0		2021	Fioul	5093.98	GWh	Full integration
10000				150				2021	Gas	37994.8	GWh	Full integration		46619.3
								2020	Coal	2215.64	GWh	Full integration
Status category	Notes							2020	Fioul	4574.86	GWh	Full integration
announced	Projects that have been publicly reported in corporate or governmental planning documents or media coverage but not yet actively moving forward by applying for permits or seeking land, material, or financing.							2020	Gas	41966.2	GWh	Full integration		48756.7
pre-construction	Projects that are actively moving forward in seeking governmental approvals, land rights, or financing.													UR
construction	Projects where site preparation and/or equipment installation are underway.							2023	Coal	1172	MWe	Full integration		0.0238529	Coal	2023
shelved	Suspension of the project has been announced, or no progress has been observed for at least two years.							2023	Fioul	3063.62	MWe	Full integration		0.167649	Fioul	2023
operating	The project has been formally commissioned; commercial operation has begun.							2023	Gas	11299.4	MWe	Full integration		0.288066	Gas	2023
cancelled	A cancellation announcement for the project has been made, or no progress has been observed for at least four years.							2022	Coal	2187	MWe	Full integration		0.0887723	Coal	2022	0.0563126
mothballed	The project is disused, but not dismantled.							2022	Fioul	3441.7	MWe	Full integration		0.174438	Fioul	2022	0.171043
retired	The project has been decommissioned or dismantled; this term is also used if the plant has been destroyed by war.							2022	Gas	11393.5	MWe	Full integration		0.365306	Gas	2022	0.326686
								2021	Coal	2187	MWe	Full integration		0.184284	Coal	2021
								2021	Fioul	3441.7	MWe	Full integration		0.168959	Fioul	2021
Capacity	Interval			Age	Interval			2021	Gas	10765.6	MWe	Full integration		0.402887	Gas	2021
0	0-10	0		-99	NA	15		2020	Coal	3739	MWe	Full integration		0.0676455	Coal	2020	0.125965
10	10-20	0		-20	Future	18		2020	Fioul	3562.37	MWe	Full integration		0.146601	Fioul	2020	0.15778
20	20-30	6		0	0-10	15		2020	Gas	12331.2	MWe	Full integration		0.388499	Gas	2020	0.395693
30	30-40	0		10	10-20	81
40	40-50	12		20	20-30	63		2023	Coal	2963.06	MWe	Net
50	50-60	0		30	30-40	36		2023	Fioul	3180.2	MWe	Net
60	60-70	0		40	40-50	33		2023	Gas	11079.7	MWe	Net	Full integration	Net
70	70-80	0		50	50-60	12		2022	Coal	3978.06	MWe	Net	15535.1	17223
80	80-90	3		60	60-70	6		2022	Fioul	3674.61	MWe	Net	17022.2	19180.8
90	90-100	0		70	70-80	0		2022	Gas	11528.1	MWe	Net	16394.3	18908.8
100	100-150	21		80	80-90	0		2021	Coal	4225.02	MWe	Net	19632.6	22137.1
150	150-200	9		90	90-100	0		2021	Fioul	3669.52	MWe	Net
200	200+	93		100	100-150	0		2021	Gas	11014.2	MWe	Net
10000				150				2020	Coal	5756.05	MWe	Net
								2020	Fioul	3794.13	MWe	Net
								2020	Gas	12587	MWe	Net

## Sheet: EDF_BAU
Type	Country/area	Region	Subregion	Plant / Project name	Unit / Phase name	Plant / Project name (local)	Plant / Project name (other)	Capacity (MW)	Status	Start year	Retired year	Technology	Fuel	Country/area 1 (hydropower only)	Country/area 2 (hydropower only)	Country/area 1 Capacity (MW) (hydropower only)	Country/area 2 Capacity (MW) (hydropower only)	Owner	Parent	Latitude	Longitude	Location accuracy	City	Local area (taluk, county)	Major area (prefecture, district)	Subnational unit (state, province)	GEM.Wiki URL	GEM location ID	GEM unit/phase ID	CompISIN	Ownership	Plant capacity	Plant capacity	Age	Reinvestment year	Reinvestment year	Reinvestment year	2020	2021	2022	2023	2024	2025	2026	2027	2028	2029	2030	2031
coal	France	Europe	Western Europe	Cordemais power station	Unit 4			630	operating	1983	2027	subcritical	bituminous					Electricité de France [100%]	Electricité de France [100.0%]	47.2767	-1.88156	exact	Cordemais		Nantes	Loire-Atlantique	https://www.gem.wiki/Cordemais_power_station	L100000101856	G100000101703	FR0010242511	1	1260		41	2023	2063	2103	630	630	630	630	630	630	630	630	630	630	630	630
coal	France	Europe	Western Europe	Cordemais power station	Unit 5			630	operating	1984	2027	subcritical	bituminous					Electricité de France [100%]	Electricité de France [100.0%]	47.2767	-1.88156	exact	Cordemais		Nantes	Loire-Atlantique	https://www.gem.wiki/Cordemais_power_station	L100000101856	G100000101704	FR0010242511	1	1260		40	2024	2064	2104	630	630	630	630	630	630	630	630	630	630	630	630
coal	China	Asia	Eastern Asia	Datang Sanmenxia power station	Phase II Unit 3	大唐三门峡发电厂		630	operating	2006		supercritical	bituminous					Datang Sanmenxia Power Generation [100%]	China Datang Corp [60.0%]; EDF International SAS [35.0%]; Sanmenxia Investment Group Co Ltd [5.0%]	34.6855	111.027	exact	Daying	Shan	Sanmenxia	Henan	https://www.gem.wiki/Datang_Sanmenxia_power_station	L100000100647	G100000102155	FR0010242511	0.35	1260		18	2046	2086	2126	220.5	220.5	220.5	220.5	220.5	220.5	220.5	220.5	220.5	220.5	220.5	220.5
coal	China	Asia	Eastern Asia	Datang Sanmenxia power station	Phase II Unit 4	大唐三门峡发电厂		630	operating	2006		supercritical	bituminous					Datang Sanmenxia Power Generation [100%]	China Datang Corp [60.0%]; EDF International SAS [35.0%]; Sanmenxia Investment Group Co Ltd [5.0%]	34.6855	111.027	exact	Daying	Shan	Sanmenxia	Henan	https://www.gem.wiki/Datang_Sanmenxia_power_station	L100000100647	G100000102156	FR0010242511	0.35	1260	1260	18	2046	2086	2126	220.5	220.5	220.5	220.5	220.5	220.5	220.5	220.5	220.5	220.5	220.5	220.5
coal	China	Asia	Eastern Asia	Fuzhou power station	Phase I Unit 1	大唐抚州发电厂		1000	operating	2015		ultra-supercritical	unknown					Jiangxi Datang International Fuzhou Power Generation [100%]	Datang International Power Generation Co Ltd [51.0%]; EDF International SAS [49.0%]	27.7845	116.564	exact	Qingni Town	Linchuan	Fuzhou	Jiangxi	https://www.gem.wiki/Fuzhou_power_station	L100000101057	G100000102041	FR0010242511	0.49	4000		9	2055	2095	2135	490	490	490	490	490	490	490	490	490	490	490	490
coal	China	Asia	Eastern Asia	Fuzhou power station	Phase I Unit 2	大唐抚州发电厂		1000	operating	2016		ultra-supercritical	unknown					Jiangxi Datang International Fuzhou Power Generation [100%]	Datang International Power Generation Co Ltd [51.0%]; EDF International SAS [49.0%]	27.7845	116.564	exact	Qingni Town	Linchuan	Fuzhou	Jiangxi	https://www.gem.wiki/Fuzhou_power_station	L100000101057	G100000102042	FR0010242511	0.49	4000		8	2056	2096	2136	490	490	490	490	490	490	490	490	490	490	490	490
coal	China	Asia	Eastern Asia	Fuzhou power station	Phase II Unit 3	大唐抚州发电厂		1000	pre-permit			ultra-supercritical	unknown					Jiangxi Datang International Fuzhou Power Generation [100%]	Datang International Power Generation Co Ltd [51.0%]; EDF International SAS [49.0%]	27.7845	116.564	exact	Qingni Town	Linchuan	Fuzhou	Jiangxi	https://www.gem.wiki/Fuzhou_power_station	L100000101057	G100000114364	FR0010242511	0.49	4000		-99	40	80	120	0	0	0	0	0	0	0	0	0	490	490	490
coal	China	Asia	Eastern Asia	Fuzhou power station	Phase II Unit 4	大唐抚州发电厂		1000	pre-permit			ultra-supercritical	unknown					Jiangxi Datang International Fuzhou Power Generation [100%]	Datang International Power Generation Co Ltd [51.0%]; EDF International SAS [49.0%]	27.7845	116.564	exact	Qingni Town	Linchuan	Fuzhou	Jiangxi	https://www.gem.wiki/Fuzhou_power_station	L100000101057	G100000114365	FR0010242511	0.49	4000	4000	-99	40	80	120	0	0	0	0	0	0	0	0	0	490	490	490
coal	France	Europe	Western Europe	Le Havre power station	Phase 2 Unit 4			630	retired	1983	2021	subcritical	bituminous					Electricité de France [100%]	Electricité de France [100.0%]	49.4757	0.147462	exact	Le Havre		Le Havre	Seine-Maritime	https://www.gem.wiki/Le_Havre_power_station	L100000101863	G100000106208	FR0010242511	1	630	630	41	2023	2063	2103	630	0	0	0	0	0	0	0	0	0	0	0
coal	China	Asia	Eastern Asia	Liaocheng Zhonghua power station	Unit 2	聊城中华发电厂		600	operating	2002		subcritical	unknown					Shandong Zhonghua Power Generation Co Ltd Liaocheng Power Plant [100%]	China Energy Investment Corp [51.0%]; China Power Investment Co Ltd [29.4%]; EDF International SAS [19.6%]	36.4659	115.909	exact	Daokoupu Town Xin Village	Dongchangfu District	Liaocheng	Shandong	https://www.gem.wiki/Liaocheng_Zhonghua_power_station	L100000101366	G100000106248	FR0010242511	0.196	1200		22	2042	2082	2122	117.6	117.6	117.6	117.6	117.6	117.6	117.6	117.6	117.6	117.6	117.6	117.6
coal	China	Asia	Eastern Asia	Liaocheng Zhonghua power station	Unit 1	聊城中华发电厂		600	operating	2003		subcritical	unknown					Shandong Zhonghua Power Generation Co Ltd Liaocheng Power Plant [100%]	China Energy Investment Corp [51.0%]; China Power Investment Co Ltd [29.4%]; EDF International SAS [19.6%]	36.4659	115.909	exact	Daokoupu Town Xin Village	Dongchangfu District	Liaocheng	Shandong	https://www.gem.wiki/Liaocheng_Zhonghua_power_station	L100000101366	G100000106247	FR0010242511	0.196	1200	1200	21	2043	2083	2123	117.6	117.6	117.6	117.6	117.6	117.6	117.6	117.6	117.6	117.6	117.6	117.6
coal	China	Asia	Eastern Asia	Shiheng-2 power station	Unit 1	国电石横发电厂		315	operating	1987		subcritical	bituminous					Shandong Zhonghua Power Generation Co Ltd Shiheng Power Plant [100%]	China Energy Investment Corp [51.0%]; China Power Investment Co Ltd [29.4%]; EDF International SAS [19.6%]	36.2123	116.514	exact	Shiheng	Feicheng	Tai'an	Shandong	https://www.gem.wiki/Shiheng-2_power_station	L100000101399	G100000109243	FR0010242511	0.196	1260		37	2027	2067	2107	61.74	61.74	61.74	61.74	61.74	61.74	61.74	61.74	61.74	61.74	61.74	61.74
coal	China	Asia	Eastern Asia	Shiheng-2 power station	Unit 2	国电石横发电厂		315	operating	1988		subcritical	bituminous					Shandong Zhonghua Power Generation Co Ltd Shiheng Power Plant [100%]	China Energy Investment Corp [51.0%]; China Power Investment Co Ltd [29.4%]; EDF International SAS [19.6%]	36.2123	116.514	exact	Shiheng	Feicheng	Tai'an	Shandong	https://www.gem.wiki/Shiheng-2_power_station	L100000101399	G100000109244	FR0010242511	0.196	1260		36	2028	2068	2108	61.74	61.74	61.74	61.74	61.74	61.74	61.74	61.74	61.74	61.74	61.74	61.74
coal	China	Asia	Eastern Asia	Shiheng-2 power station	Unit 3	国电石横发电厂		315	operating	1997		subcritical	bituminous					Shandong Zhonghua Power Generation Co Ltd Shiheng Power Plant [100%]	China Energy Investment Corp [51.0%]; China Power Investment Co Ltd [29.4%]; EDF International SAS [19.6%]	36.2123	116.514	exact	Shiheng	Feicheng	Tai'an	Shandong	https://www.gem.wiki/Shiheng-2_power_station	L100000101399	G100000109245	FR0010242511	0.196	1260		27	2037	2077	2117	61.74	61.74	61.74	61.74	61.74	61.74	61.74	61.74	61.74	61.74	61.74	61.74
coal	China	Asia	Eastern Asia	Shiheng-2 power station	Unit 4	国电石横发电厂		315	operating	1997		subcritical	bituminous					Shandong Zhonghua Power Generation Co Ltd Shiheng Power Plant [100%]	China Energy Investment Corp [51.0%]; China Power Investment Co Ltd [29.4%]; EDF International SAS [19.6%]	36.2123	116.514	exact	Shiheng	Feicheng	Tai'an	Shandong	https://www.gem.wiki/Shiheng-2_power_station	L100000101399	G100000109246	FR0010242511	0.196	1260	1260	27	2037	2077	2117	61.74	61.74	61.74	61.74	61.74	61.74	61.74	61.74	61.74	61.74	61.74	61.74
coal	United Kingdom	Europe	Northern Europe	West Burton power station	Unit 1			547	retired	1967	2022	subcritical	bituminous					EDF Energy [100%]	EDF Energy Holdings Ltd [100.0%]	53.3627	-0.811836	exact	Sturton-le-Steeple	Bassetlaw	Nottinghamshire	England	https://www.gem.wiki/West_Burton_power_station	L100000103762	G100000110893	FR0010242511	1	2487		57	2007	2047	2087	547	547	0	0	0	0	0	0	0	0	0	0
coal	United Kingdom	Europe	Northern Europe	West Burton power station	Unit 2			547	retired	1967	2022	subcritical	bituminous					EDF Energy [100%]	EDF Energy Holdings Ltd [100.0%]	53.3627	-0.811836	exact	Sturton-le-Steeple	Bassetlaw	Nottinghamshire	England	https://www.gem.wiki/West_Burton_power_station	L100000103762	G100000110894	FR0010242511	1	2487		57	2007	2047	2087	547	547	0	0	0	0	0	0	0	0	0	0
coal	United Kingdom	Europe	Northern Europe	West Burton power station	Unit 3			547	retired	1967	2023	subcritical	bituminous					EDF Energy [100%]	EDF Energy Holdings Ltd [100.0%]	53.3627	-0.811836	exact	Sturton-le-Steeple	Bassetlaw	Nottinghamshire	England	https://www.gem.wiki/West_Burton_power_station	L100000103762	G100000110895	FR0010242511	1	2487		57	2007	2047	2087	547	547	547	0	0	0	0	0	0	0	0	0
coal	United Kingdom	Europe	Northern Europe	West Burton power station	Unit 4			547	retired	1967	2023	subcritical	bituminous					EDF Energy [100%]	EDF Energy Holdings Ltd [100.0%]	53.3627	-0.811836	exact	Sturton-le-Steeple	Bassetlaw	Nottinghamshire	England	https://www.gem.wiki/West_Burton_power_station	L100000103762	G100000110896	FR0010242511	1	2487	2487	57	2007	2047	2087	547	547	547	0	0	0	0	0	0	0	0	0
oil/gas	France	Europe	Western Europe	Amfard power station	14		Total Gonfreville	120	operating	2004		CC	NG					EDF [50.0%]; Texaco [25.0%]; TotalEnergies SE [25.0%]	Chevron Corp [25.0%]; TotalEnergies SE [25.0%]	49.48	0.22	exact	Gonfreville-l'Orcher			Seine-Maritime	https://www.gem.wiki/Amfard_power_station	L100000400088	G100000400088	FR0010242511	0.5	240		20	2044	2084	2124	60	60	60	60	60	60	60	60	60	60	60	60
oil/gas	France	Europe	Western Europe	Amfard power station	15		Total Gonfreville	120	operating	2004		CC	NG					EDF [50.0%]; Texaco [25.0%]; TotalEnergies SE [25.0%]	Chevron Corp [25.0%]; TotalEnergies SE [25.0%]	49.48	0.22	exact	Gonfreville-l'Orcher			Seine-Maritime	https://www.gem.wiki/Amfard_power_station	L100000400088	G100000400089	FR0010242511	0.5	240	240	20	2044	2084	2124	60	60	60	60	60	60	60	60	60	60	60	60
oil/gas	Belgium	Europe	Western Europe	Angleur power station	31			25	operating	1978		GT	NG/FO					Luminus NV/SA [100%]	EDF Belgium SA [68.6%]; Pubilec CVBA/SCRL [26.4%]	50.6177	5.5837	exact	Angleur			Liege	https://www.gem.wiki/Angleur_power_station	L100000400018	G100000400018	FR0010242511	0.686	178		46	2018	2058	2098	17.15	17.15	17.15	17.15	17.15	17.15	17.15	17.15	17.15	17.15	17.15	17.15
oil/gas	Belgium	Europe	Western Europe	Angleur power station	32			25	operating	1978		GT	NG					Luminus NV/SA [100%]	EDF Belgium SA [68.6%]; Pubilec CVBA/SCRL [26.4%]	50.6177	5.5837	exact	Angleur			Liege	https://www.gem.wiki/Angleur_power_station	L100000400018	G100000400019	FR0010242511	0.686	178		46	2018	2058	2098	17.15	17.15	17.15	17.15	17.15	17.15	17.15	17.15	17.15	17.15	17.15	17.15
oil/gas	Belgium	Europe	Western Europe	Angleur power station	41			64	operating	2008		GT	NG					Luminus NV/SA [100%]	EDF Belgium SA [68.6%]; Pubilec CVBA/SCRL [26.4%]	50.6177	5.5837	exact	Angleur			Liege	https://www.gem.wiki/Angleur_power_station	L100000400018	G100000400020	FR0010242511	0.686	178		16	2048	2088	2128	43.904	43.904	43.904	43.904	43.904	43.904	43.904	43.904	43.904	43.904	43.904	43.904
oil/gas	Belgium	Europe	Western Europe	Angleur power station	42			64	operating	2008		GT	NG					Luminus NV/SA [100%]	EDF Belgium SA [68.6%]; Pubilec CVBA/SCRL [26.4%]	50.6177	5.5837	exact	Angleur			Liege	https://www.gem.wiki/Angleur_power_station	L100000400018	G100000400021	FR0010242511	0.686	178	178	16	2048	2088	2128	43.904	43.904	43.904	43.904	43.904	43.904	43.904	43.904	43.904	43.904	43.904	43.904
oil/gas	France	Europe	Western Europe	Bassens power station	1			42	operating	1998		GT	NG					COGETHERM [100.0%]	Electricité de France SA [100.0%]	44.9165	-0.526851	exact	Bassens			Nouvelle-Aquitaine	https://www.gem.wiki/Bassens_power_station	L100000407672	G100000410025	FR0010242511	1	42	42	26	2038	2078	2118	42	42	42	42	42	42	42	42	42	42	42	42
oil/gas	Martinique	Americas	Latin America and the Caribbean	Bellefontaine power station	IC1-12			219.6	operating	2014		IC	HFO/D					Electricité de France SA [100%]	Electricité de France SA [100.0%]	14.6695	-61.1546	exact	Bellefontaine			Martinique	https://gem.wiki/Bellefontaine_power_station	L100000408645	G100000412007	FR0010242511	1	219.6	219.6	10	2054	2094	2134	219.6	219.6	219.6	219.6	219.6	219.6	219.6	219.6	219.6	219.6	219.6	219.6
oil/gas	France	Europe	Western Europe	Blénod power station	5			427	operating	2011		CC	NG					EDF [100.0%]	EDF [100.0%]	48.869	6.08415	exact	Blenod-les-Pont-a-Mousson/Meurthe-et-Moselle			Meurthe-et-Moselle	https://www.gem.wiki/Bl%C3%A9nod_power_station	L100000101857	G100000400091	FR0010242511	1	427	427	13	2051	2091	2131	427	427	427	427	427	427	427	427	427	427	427	427
oil/gas	France	Europe	Western Europe	Bouchain power station	7			585	operating	2016		CC	NG					EDF [100.0%]	EDF [100.0%]	50.2987	3.3156	exact	Bouchain			Nord	https://www.gem.wiki/Bouchain_power_station	L100000101860	G100000400092	FR0010242511	1	585	585	8	2056	2096	2136	585	585	585	585	585	585	585	585	585	585	585	585
oil/gas	France	Europe	Western Europe	Brennilis power station	GT1			92	operating	1980		GT	HFO					EDF [100.0%]	EDF [100.0%]	48.357	-3.86916	exact	Brennilis			Brittany	https://www.gem.wiki/Brennilis_power_station	L100000408805	G100000412941	FR0010242511	1	324		44	2020	2060	2100	92	92	92	92	92	92	92	92	92	92	92	92
oil/gas	France	Europe	Western Europe	Brennilis power station	GT3			140	operating	1981		GT	HFO					EDF [100.0%]	EDF [100.0%]	48.357	-3.86916	exact	Brennilis			Brittany	https://www.gem.wiki/Brennilis_power_station	L100000408805	G100000412939	FR0010242511	1	324		43	2021	2061	2101	140	140	140	140	140	140	140	140	140	140	140	140
oil/gas	France	Europe	Western Europe	Brennilis power station	GT2			92	operating	1997		GT	HFO					EDF [100.0%]	EDF [100.0%]	48.357	-3.86916	exact	Brennilis			Brittany	https://www.gem.wiki/Brennilis_power_station	L100000408805	G100000412940	FR0010242511	1	324	324	27	2037	2077	2117	92	92	92	92	92	92	92	92	92	92	92	92
oil/gas	French Guiana	Americas	Latin America and the Caribbean	Degrad-des-Cannes power station	IC			42.7	operating	1982	2026	IC	D/HFO					Electricité de France SA [100%]	Electricité de France SA [100.0%]	4.86293	-52.2754	exact	Remire-Montjoly			French Guiana	https://gem.wiki/Degrad-des-Cannes_power_station	L100000408638	G100000412031	FR0010242511	1	110.7		42	2022	2062	2102	42.7	42.7	42.7	42.7	42.7	42.7	42.7	42.7	42.7	42.7	42.7	42.7
oil/gas	French Guiana	Americas	Latin America and the Caribbean	Degrad-des-Cannes power station	GT1			20	operating	1991	2026	GT	D/HFO					Electricité de France SA [100%]	Electricité de France SA [100.0%]	4.86293	-52.2754	exact	Remire-Montjoly			French Guiana	https://gem.wiki/Degrad-des-Cannes_power_station	L100000408638	G100000412033	FR0010242511	1	110.7		33	2031	2071	2111	20	20	20	20	20	20	20	20	20	20	20	20
oil/gas	French Guiana	Americas	Latin America and the Caribbean	Degrad-des-Cannes power station	GT2			20	operating	2008	2026	GT	D/HFO					Electricité de France SA [100%]	Electricité de France SA [100.0%]	4.86293	-52.2754	exact	Remire-Montjoly			French Guiana	https://gem.wiki/Degrad-des-Cannes_power_station	L100000408638	G100000412032	FR0010242511	1	110.7		16	2048	2088	2128	20	20	20	20	20	20	20	20	20	20	20	20
oil/gas	French Guiana	Americas	Latin America and the Caribbean	Degrad-des-Cannes power station	IC3			14	operating	2018	2026	IC	D/HFO					Electricité de France SA [100%]	Electricité de France SA [100.0%]	4.86293	-52.2754	exact	Remire-Montjoly			French Guiana	https://gem.wiki/Degrad-des-Cannes_power_station	L100000408638	G100000412030	FR0010242511	1	110.7		6	2058	2098	2138	14	14	14	14	14	14	14	14	14	14	14	14
oil/gas	French Guiana	Americas	Latin America and the Caribbean	Degrad-des-Cannes power station	IC4			14	operating	2020	2026	IC	D/HFO					Electricité de France SA [100%]	Electricité de France SA [100.0%]	4.86293	-52.2754	exact	Remire-Montjoly			French Guiana	https://gem.wiki/Degrad-des-Cannes_power_station	L100000408638	G100000412029	FR0010242511	1	110.7	110.7	4	2060	2100	2140	14	14	14	14	14	14	14	14	14	14	14	14
oil/gas	France	Europe	Western Europe	Dirinon power station	GT1			92	operating	1980		GT	HFO					EDF [100.0%]	EDF [100.0%]	48.3899	4.26233	exact	Dirinon			Brittany	https://www.gem.wiki/Dirinon_power_station	L100000408745	G100000412938	FR0010242511	1	184		44	2020	2060	2100	92	92	92	92	92	92	92	92	92	92	92	92
oil/gas	France	Europe	Western Europe	Dirinon power station	GT2			92	operating	1981		GT	HFO					EDF [100.0%]	EDF [100.0%]	48.3899	4.26233	exact	Dirinon			Brittany	https://www.gem.wiki/Dirinon_power_station	L100000408745	G100000412937	FR0010242511	1	184	184	43	2021	2061	2101	92	92	92	92	92	92	92	92	92	92	92	92
oil/gas	Germany	Europe	Western Europe	EDF Premnitz power station	CC			400	shelved			CC	NG					EDF Deutschland GmbH [100.0%]	EDF International SAS [100.0%]	52.5337	12.3487	approximate	Premintz			Brandenburg	https://www.gem.wiki/EDF_Premnitz_power_station	L100000401428	G100000400884	FR0010242511	1	400	400	-99	40	80	120	0	0	0	0	0	0	0	0	0	0	0	0
oil/gas	Chile	Americas	Latin America and the Caribbean	El Campesino power station	1	Central Termoeléctrica El Campesino		640	shelved			CC	LNG					Generadora Metropolitana SpA [100%]	Andes Mining & Energy SA [50.0%]; Electricité de France SA [50.0%]	-36.7943	-72.4203	approximate	Bulnes			Ñuble	https://gem.wiki/El_Campesino_power_station	L100000406554	G100000406731	FR0010242511	0.5	640	640	-99	40	80	120	0	0	0	0	0	0	0	0	0	0	0	0
oil/gas	France	Europe	Western Europe	Gennevilliers power station	1			203	operating	1994		GT	NG					EDF [100.0%]	EDF [100.0%]	48.937	2.26144	exact	Gennevilliers			Hauts-de-Siene	https://www.gem.wiki/Gennevilliers_power_station	L100000400101	G100000400101	FR0010242511	1	203	203	30	2034	2074	2114	203	203	203	203	203	203	203	203	203	203	203	203
oil/gas	Belgium	Europe	Western Europe	Ham (Gent) power station	1			43	operating	1993		CC	NG					Luminus NV/SA [100%]	EDF Belgium SA [68.6%]; Pubilec CVBA/SCRL [26.4%]	51.0596	3.7364	exact	Gent			East Flanders	https://www.gem.wiki/Ham_(Gent)_power_station	L100000400025	G100000406272	FR0010242511	0.686	159		31	2033	2073	2113	29.498	29.498	29.498	29.498	29.498	29.498	29.498	29.498	29.498	29.498	29.498	29.498
oil/gas	Belgium	Europe	Western Europe	Ham (Gent) power station	31			58	operating	2006		GT	NG					Luminus NV/SA [100%]	EDF Belgium SA [68.6%]; Pubilec CVBA/SCRL [26.4%]	51.0596	3.7364	exact	Gent			East Flanders	https://www.gem.wiki/Ham_(Gent)_power_station	L100000400025	G100000400025	FR0010242511	0.686	159		18	2046	2086	2126	39.788	39.788	39.788	39.788	39.788	39.788	39.788	39.788	39.788	39.788	39.788	39.788
oil/gas	Belgium	Europe	Western Europe	Ham (Gent) power station	32			58	operating	2006		GT	NG					Luminus NV/SA [100%]	EDF Belgium SA [68.6%]; Pubilec CVBA/SCRL [26.4%]	51.0596	3.7364	exact	Gent			East Flanders	https://www.gem.wiki/Ham_(Gent)_power_station	L100000400025	G100000400026	FR0010242511	0.686	159	159	18	2046	2086	2126	39.788	39.788	39.788	39.788	39.788	39.788	39.788	39.788	39.788	39.788	39.788	39.788
oil/gas	Belgium	Europe	Western Europe	Izegem power station	1			20	operating	1995		GT	NG					Luminus NV/SA [100%]	EDF Belgium SA [68.6%]; Pubilec CVBA/SCRL [26.4%]	50.9238	3.21298	exact	Izegem			West Flanders	https://www.gem.wiki/Izegem_power_station	L100000406372	G100000406280	FR0010242511	0.686	20	20	29	2035	2075	2115	13.72	13.72	13.72	13.72	13.72	13.72	13.72	13.72	13.72	13.72	13.72	13.72
oil/gas	Guadeloupe	Americas	Latin America and the Caribbean	Jarry Sud power station	TAC3			20	operating	1989	2025	GT	HFO					Electricité de France SA [100%]	Electricité de France SA [100.0%]	16.2331	-61.5554	exact	Baie-Mahault			Guadaloupe	https://gem.wiki/Jarry_Sud_power_station	L100000408660	G100000412026	FR0010242511	1	81		35	2029	2069	2109	20	20	20	20	20	20	20	20	20	20	20	20
oil/gas	Guadeloupe	Americas	Latin America and the Caribbean	Jarry Sud power station	TAC4			21	operating	1993	2028	GT	HFO					Electricité de France SA [100%]	Electricité de France SA [100.0%]	16.2331	-61.5554	exact	Baie-Mahault			Guadaloupe	https://gem.wiki/Jarry_Sud_power_station	L100000408660	G100000412025	FR0010242511	1	81		31	2033	2073	2113	21	21	21	21	21	21	21	21	21	21	21	21
oil/gas	Guadeloupe	Americas	Latin America and the Caribbean	Jarry Sud power station	TAC5			40	operating	2004		GT	HFO					Electricité de France SA [100%]	Electricité de France SA [100.0%]	16.2331	-61.5554	exact	Baie-Mahault			Guadaloupe	https://gem.wiki/Jarry_Sud_power_station	L100000408660	G100000412024	FR0010242511	1	81	81	20	2044	2084	2124	40	40	40	40	40	40	40	40	40	40	40	40
oil/gas	Belgium	Europe	Western Europe	Jemeppe-sur-Sambre power station	1		Jemeppe-Solvay	106	operating	2000		CC	NG					Luminus NV/SA [100%]	EDF Belgium SA [68.6%]; Pubilec CVBA/SCRL [26.4%]	50.4477	4.66122	exact	Jemeppe-sur-Sambre			Namur	https://www.gem.wiki/Jemeppe-sur-Sambre_power_station	L100000400029	G100000400029	FR0010242511	0.686	106	106	24	2040	2080	2120	72.716	72.716	72.716	72.716	72.716	72.716	72.716	72.716	72.716	72.716	72.716	72.716
oil/gas	French Guiana	Americas	Latin America and the Caribbean	Kourou power station	GT1			20	operating	1993	2025	GT	D/HFO					Electricité de France SA [100%]	Electricité de France SA [100.0%]	5.1628	-52.6701	exact	Kourou			French Guiana	https://gem.wiki/Kourou_power_station	L100000408893	G100000412028	FR0010242511	1	40		31	2033	2073	2113	20	20	20	20	20	20	20	20	20	20	20	20
oil/gas	French Guiana	Americas	Latin America and the Caribbean	Kourou power station	GT2			20	operating	2014	2025	GT	D/HFO					Electricité de France SA [100%]	Electricité de France SA [100.0%]	5.1628	-52.6701	exact	Kourou			French Guiana	https://gem.wiki/Kourou_power_station	L100000408893	G100000412027	FR0010242511	1	40	40	10	2054	2094	2134	20	20	20	20	20	20	20	20	20	20	20	20
oil/gas	France	Europe	Western Europe	Lavera power station	1			28	operating	2001		CC	NG					Air Liquide SA; COGETHERM	Air Liquide SA; Electricité de France SA	43.3912	4.99689	approximate	Lavera			Martigues	https://www.gem.wiki/Lavera_power_station	L100000406386	G100000406309	FR0010242511	0.5	28	28	23	2041	2081	2121	14	14	14	14	14	14	14	14	14	14	14	14
oil/gas	Réunion	Africa	Sub-Saharan Africa	Le Port Est power station	IC			219.6	operating	2014		ICCC	D					EDF [100.0%]	EDF [100.0%]	-20.9305	55.3268	exact	Port Réunion Est			Réunion	https://www.gem.wiki/Le_Port_Est_power_station	L100000408167	G100000411357	FR0010242511	1	219.6	219.6	10	2054	2094	2134	219.6	219.6	219.6	219.6	219.6	219.6	219.6	219.6	219.6	219.6	219.6	219.6
oil/gas	France	Europe	Western Europe	Lille power station	CHP			46	operating	2006		GT	NG					EDF [100.0%]	EDF [100.0%]	50.6243	3.0068	approximate	Lille			Hauts-de-France	https://www.gem.wiki/Lille_power_station	L100000407937	G100000410788	FR0010242511	1	46	46	18	2046	2086	2126	46	46	46	46	46	46	46	46	46	46	46	46
oil/gas	Chile	Americas	Latin America and the Caribbean	Los Vientos power station	1	Termoeléctrica Los Vientos		132	operating	2007		GT	D					Generadora Metropolitana SpA [100%]	Andes Mining & Energy SA [50.0%]; Electricité de France SA [50.0%]	-32.8435	-71.0123	exact	Llay-Llay			Valparaíso	https://gem.wiki/Los_Vientos_power_station	L100000408575	G100000412132	FR0010242511	0.5	132	132	17	2047	2087	2127	66	66	66	66	66	66	66	66	66	66	66	66
oil/gas	France	Europe	Western Europe	Lucciana power station	GT1			20	operating	1992		GT	HFO					EDF [100.0%]	EDF [100.0%]	42.5284	9.447	exact	Lucciana			Corsica	https://www.gem.wiki/Lucciana_power_station	L100000408774	G100000412926	FR0010242511	1	231		32	2032	2072	2112	20	20	20	20	20	20	20	20	20	20	20	20
oil/gas	France	Europe	Western Europe	Lucciana power station	GT2			20	operating	1992		GT	HFO					EDF [100.0%]	EDF [100.0%]	42.5284	9.447	exact	Lucciana			Corsica	https://www.gem.wiki/Lucciana_power_station	L100000408774	G100000412925	FR0010242511	1	231		32	2032	2072	2112	20	20	20	20	20	20	20	20	20	20	20	20
oil/gas	France	Europe	Western Europe	Lucciana power station	GT3			25	operating	1993		GT	HFO					EDF [100.0%]	EDF [100.0%]	42.5284	9.447	exact	Lucciana			Corsica	https://www.gem.wiki/Lucciana_power_station	L100000408774	G100000412924	FR0010242511	1	231		31	2033	2073	2113	25	25	25	25	25	25	25	25	25	25	25	25
oil/gas	France	Europe	Western Europe	Lucciana power station	GT4			40	operating	2008		GT	HFO					EDF [100.0%]	EDF [100.0%]	42.5284	9.447	exact	Lucciana			Corsica	https://www.gem.wiki/Lucciana_power_station	L100000408774	G100000412923	FR0010242511	1	231		16	2048	2088	2128	40	40	40	40	40	40	40	40	40	40	40	40
oil/gas	France	Europe	Western Europe	Lucciana power station	IC1-7			126	operating	2014		ICCC	D/NG					EDF [100.0%]	EDF [100.0%]	42.5284	9.447	exact	Lucciana			Corsica	https://www.gem.wiki/Lucciana_power_station	L100000408774	G100000412922	FR0010242511	1	231	231	10	2054	2094	2134	126	126	126	126	126	126	126	126	126	126	126	126
oil/gas	France	Europe	Western Europe	Martigues-Ponteau power station	5		La Centrale Thermique de Martigues	499	operating	2012		CC	NG					EDF [100.0%]	EDF [100.0%]	43.3582	5.02112	exact	Martigues			Bouches-du-Rhône	https://www.gem.wiki/Martigues-Ponteau_power_station	L100000400102	G100000400102	FR0010242511	1	998		12	2052	2092	2132	499	499	499	499	499	499	499	499	499	499	499	499
oil/gas	France	Europe	Western Europe	Martigues-Ponteau power station	6		La Centrale Thermique de Martigues	499	operating	2013		CC	NG					EDF [100.0%]	EDF [100.0%]	43.3582	5.02112	exact	Martigues			Bouches-du-Rhône	https://www.gem.wiki/Martigues-Ponteau_power_station	L100000400102	G100000400103	FR0010242511	1	998	998	11	2053	2093	2133	499	499	499	499	499	499	499	499	499	499	499	499
oil/gas	France	Europe	Western Europe	Montereau power station	5		Centrale Thermique de Montereau	200	operating	2010		GT	NG/FO					EDF [100.0%]	EDF [100.0%]	48.3803	2.85126	exact	Vernou-la-Celle-sur-Seine			Seine-et-Marne	https://www.gem.wiki/Montereau_power_station	L100000406384	G100000406305	FR0010242511	1	400		14	2050	2090	2130	200	200	200	200	200	200	200	200	200	200	200	200
oil/gas	France	Europe	Western Europe	Montereau power station	6		Centrale Thermique de Montereau	200	operating	2010		GT	NG/FO					EDF [100.0%]	EDF [100.0%]	48.3803	2.85126	exact	Vernou-la-Celle-sur-Seine			Seine-et-Marne	https://www.gem.wiki/Montereau_power_station	L100000406384	G100000406304	FR0010242511	1	400	400	14	2050	2090	2130	200	200	200	200	200	200	200	200	200	200	200	200
oil/gas	Brazil	Americas	Latin America and the Caribbean	Norte Fluminense 2 power station	1	Usina Termelétrica Norte Fluminense 2		1713	pre-construction	2025		CC	NG/LNG					EDF Norte Fluminense SA [100%]	Electricité de France SA [100.0%]	-22.3189	-41.8478	approximate	Macaé			Rio de Janeiro	https://gem.wiki/Norte_Fluminense_2_power_station	L100000406521	G100000406783	FR0010242511	1	1713	1713	-1	2065	2105	2145	0	0	0	0	0	1713	1713	1713	1713	1713	1713	1713
oil/gas	Brazil	Americas	Latin America and the Caribbean	Norte Fluminense power station	1	Usina Termelétrica Norte Fluminense		827	operating	2004		CC	NG/LNG					Usina Terméletrica Norte Fluminense SA [100%]	Electricité de France SA [100.0%]	-22.3055	-41.8814	exact	Macaé			Rio de Janeiro	https://gem.wiki/Norte_Fluminense_power_station	L100000406520	G100000406784	FR0010242511	1	827	827	20	2044	2084	2124	827	827	827	827	827	827	827	827	827	827	827	827
oil/gas	Chile	Americas	Latin America and the Caribbean	Nueva Renca power station	1	Central Termoeléctrica Nueva Renca		379	operating	1997		CC	NG/D					Generadora Metropolitana SpA [100%]	Andes Mining & Energy SA [50.0%]; Electricité de France SA [50.0%]	-33.4184	-70.687	exact	Renca			Metropolitana de Santiago	https://gem.wiki/Nueva_Renca_power_station	L100000406561	G100000406723	FR0010242511	0.5	379	379	27	2037	2077	2117	189.5	189.5	189.5	189.5	189.5	189.5	189.5	189.5	189.5	189.5	189.5	189.5
oil/gas	Vietnam	Asia	South-eastern Asia	Phu My 2.2 Thermal power station	1	Nhà Máy Nhiệt Điện Phú Mỹ 2.2		733	operating	2005		CC	NG					Mekong Energy Co Ltd [100.0%]	EDF International SAS [56.2%]; Summit Global Management II BV [28.1%]; Tokyo Electric Power Company International BV [15.6%]	10.603	107.04	exact	Phú Mỹ			Ba Ria - Vung Tau	https://www.gem.wiki/Phu_My_2.2_Thermal_power_station	L100000405447	G100000404534	FR0010242511	0.562	733	733	19	2045	2085	2125	411.946	411.946	411.946	411.946	411.946	411.946	411.946	411.946	411.946	411.946	411.946	411.946
oil/gas	Martinique	Americas	Latin America and the Caribbean	Pointe des Carrières power station	GT1			27	operating	1996		GT	HFO/D					Electricité de France SA [100%]	Electricité de France SA [100.0%]	14.5973	-61.058	exact	Fort-de-France			Martinique	https://gem.wiki/Pointe_des_Carrières_power_station	L100000408644	G100000412006	FR0010242511	1	104		28	2036	2076	2116	27	27	27	27	27	27	27	27	27	27	27	27
oil/gas	Martinique	Americas	Latin America and the Caribbean	Pointe des Carrières power station	GT2			17	operating	1996		GT	HFO/D					Electricité de France SA [100%]	Electricité de France SA [100.0%]	14.5973	-61.058	exact	Fort-de-France			Martinique	https://gem.wiki/Pointe_des_Carrières_power_station	L100000408644	G100000412005	FR0010242511	1	104		28	2036	2076	2116	17	17	17	17	17	17	17	17	17	17	17	17
oil/gas	Martinique	Americas	Latin America and the Caribbean	Pointe des Carrières power station	IC			60	operating	1996		IC	HFO/D					Electricité de France SA [100%]	Electricité de France SA [100.0%]	14.5973	-61.058	exact	Fort-de-France			Martinique	https://gem.wiki/Pointe_des_Carrières_power_station	L100000408644	G100000412004	FR0010242511	1	104	104	28	2036	2076	2116	60	60	60	60	60	60	60	60	60	60	60	60
oil/gas	Guadeloupe	Americas	Latin America and the Caribbean	Pointe Jarry power station	IC1-12			211.2	operating	2014		IC	HFO					Electricité de France SA [100%]	Electricité de France SA [100.0%]	16.2323	-61.5541	exact	Baie-Mahault			Guadaloupe	https://gem.wiki/Pointe_Jarry_power_station	L100000408659	G100000412023	FR0010242511	1	211.2	211.2	10	2054	2094	2134	211.2	211.2	211.2	211.2	211.2	211.2	211.2	211.2	211.2	211.2	211.2	211.2
oil/gas	Chile	Americas	Latin America and the Caribbean	Renca power station	1	Termoeléctrica Renca		50	operating	1962		ST	D					Generadora Metropolitana SpA [100%]	Andes Mining & Energy SA [50.0%]; Electricité de France SA [50.0%]	-33.4179	-70.6876	exact	Renca			Metropolitana de Santiago	https://gem.wiki/Renca_power_station	L100000408572	G100000412129	FR0010242511	0.5	100		62	2002	2042	2082	25	25	25	25	25	25	25	25	25	25	25	25
oil/gas	Chile	Americas	Latin America and the Caribbean	Renca power station	2	Termoeléctrica Renca		50	operating	1962		ST	D					Generadora Metropolitana SpA [100%]	Andes Mining & Energy SA [50.0%]; Electricité de France SA [50.0%]	-33.4179	-70.6876	exact	Renca			Metropolitana de Santiago	https://gem.wiki/Renca_power_station	L100000408572	G100000412128	FR0010242511	0.5	100	100	62	2002	2042	2082	25	25	25	25	25	25	25	25	25	25	25	25
oil/gas	Belgium	Europe	Western Europe	Ringvaart power station	1			385	operating	1998		CC	NG					Luminus NV/SA [100%]	EDF Belgium SA [68.6%]; Pubilec CVBA/SCRL [26.4%]	51.1049	3.7257	exact	Gent			East Flanders	https://www.gem.wiki/Ringvaart_power_station	L100000400032	G100000400032	FR0010242511	0.686	385	385	26	2038	2078	2118	264.11	264.11	264.11	264.11	264.11	264.11	264.11	264.11	264.11	264.11	264.11	264.11
oil/gas	Chile	Americas	Latin America and the Caribbean	Santa Lidia power station	1	Termoeléctrica Santa Lidia		139	operating	2009		GT	D					Generadora Metropolitana SpA [100%]	Andes Mining & Energy SA [50.0%]; Electricité de France SA [50.0%]	-37.0925	-72.3162	exact	Cabrero			Biobío	https://gem.wiki/Santa_Lidia_power_station	L100000408579	G100000412126	FR0010242511	0.5	139	139	15	2049	2089	2129	69.5	69.5	69.5	69.5	69.5	69.5	69.5	69.5	69.5	69.5	69.5	69.5
oil/gas	Belgium	Europe	Western Europe	Seraing power station	1			470	operating	1994		CC	NG					Luminus NV/SA [100%]	EDF Belgium SA [68.6%]; Pubilec CVBA/SCRL [26.4%]	50.603	5.4917	exact	Seraing			Liege	https://www.gem.wiki/Seraing_power_station	L100000400035	G100000400035	FR0010242511	0.686	1340		30	2034	2074	2114	322.42	322.42	322.42	322.42	322.42	322.42	322.42	322.42	322.42	322.42	322.42	322.42
oil/gas	Belgium	Europe	Western Europe	Seraing power station	2			870	pre-construction	2025		CC	NG					Luminus NV/SA [100%]	EDF Belgium SA [68.6%]; Pubilec CVBA/SCRL [26.4%]	50.603	5.4917	exact	Seraing			Liege	https://www.gem.wiki/Seraing_power_station	L100000400035	G100000406271	FR0010242511	0.686	1340	1340	-1	2065	2105	2145	0	0	0	0	0	596.82	596.82	596.82	596.82	596.82	596.82	596.82
oil/gas	Vietnam	Asia	South-eastern Asia	Son My I power station	1	Nhà máy Nhiệt điện Sơn Mỹ 1		2250	pre-construction	2030		CC	LNG					EDF [37.5%]; Pacific Corp [25.0%]; Kyushu Electric Power Co Inc [18.8%]; Sojitz Corp [18.8%]	Pacific Group JSC [25.0%]; Kyushu Electric Power Co Inc [18.8%]; Sojitz Corp [18.8%]	10.6501	107.685	approximate	Ham Tan			Binh Thuan	https://www.gem.wiki/Son_My_I_power_station	L100000405451	G100000404544	FR0010242511	0.375	2250	2250	-6	2070	2110	2150	0	0	0	0	0	0	0	0	0	0	843.75	843.75
oil/gas	Uzbekistan	Asia	Central Asia	Surkhandarya power station	CC1	ТЭС в Сурхандарьинской области/Сурхандарьинская ПГУ (Russian)	Surkhandarya Combined Cycle Power Plant	1600	construction	2027		CC	NG/FO					Nebras Power QPSC [35.0%]; Siemens Energy AG [25.0%]; Stone City Energy BV [25.0%]; EDF [15.0%]	Siemens Energy AG [25.0%]; Qatar Electricity and Water Company QPSC [21.0%]; Ras Laffan Operating Company WLL [14.0%]	37.3768	67.2521	exact	Angor		Angor	Surkhandarya	https://www.gem.wiki/Surkhandarya_power_station	L100000406876	G100000407376	FR0010242511	0.15	1600	1600	-3	2067	2107	2147	0	0	0	0	0	0	0	240	240	240	240	240
oil/gas	Uzbekistan	Asia	Central Asia	Syrdarya II power station	1	ТЭС «Сырдарья-2»/(Russian)		1573	construction	2026		CC	NG					EDF [33.3%]; Nebras Power QPSC [33.3%]; Sojitz Corp [19.0%]; Kyuden International Corp [14.3%]	Qatar Electricity and Water Company QPSC [20.0%]; Sojitz Corp [19.0%]; Kyushu Electric Power Co Inc [14.3%]; Ras Laffan Operating Company WLL [13.3%]	40.2421	69.1054	exact	Shirin		Bayaut	Sirdaryo	https://www.gem.wiki/Syrdarya_II_power_station	L100000406884	G100000407423	FR0010242511	0.333	1573	1573	-2	2066	2106	2146	0	0	0	0	0	0	523.809	523.809	523.809	523.809	523.809	523.809
oil/gas	France	Europe	Western Europe	Vaires power station	1			200	operating	2008		CC	HFO					EDF [100.0%]	EDF [100.0%]	48.8736	2.65585	exact	Vaires-sur-Marne			Seine-et-Marne	https://www.gem.wiki/Vaires_power_station	L100000104715	G100000412916	FR0010242511	1	600		16	2048	2088	2128	200	200	200	200	200	200	200	200	200	200	200	200
oil/gas	France	Europe	Western Europe	Vaires power station	2			200	operating	2008		CC	HFO					EDF [100.0%]	EDF [100.0%]	48.8736	2.65585	exact	Vaires-sur-Marne			Seine-et-Marne	https://www.gem.wiki/Vaires_power_station	L100000104715	G100000412915	FR0010242511	1	600		16	2048	2088	2128	200	200	200	200	200	200	200	200	200	200	200	200
oil/gas	France	Europe	Western Europe	Vaires power station	3			200	operating	2009		CC	HFO					EDF [100.0%]	EDF [100.0%]	48.8736	2.65585	exact	Vaires-sur-Marne			Seine-et-Marne	https://www.gem.wiki/Vaires_power_station	L100000104715	G100000412914	FR0010242511	1	600	600	15	2049	2089	2129	200	200	200	200	200	200	200	200	200	200	200	200
oil/gas	France	Europe	Western Europe	Varengeville power station	CHP			43	operating	1998		GT	NG					EDF [100.0%]	EDF [100.0%]	49.9025	1.002	approximate	Varengeville-sur-Mer			Haute-Normandy	https://www.gem.wiki/Varengeville_power_station	L100000407931	G100000410782	FR0010242511	1	43	43	26	2038	2078	2118	43	43	43	43	43	43	43	43	43	43	43	43
oil/gas	France	Europe	Western Europe	Vazzio power station	IC1		Ricanto	133	operating	1981		ICCC	HFO					EDF Production Electrique Insulaire SAS [100.0%]	Electricité de France SA [100.0%]	41.9321	8.72044	exact	Ajaccio			Corsica	https://www.gem.wiki/Vazzio_power_station	L100000400109	G100000412912	FR0010242511	1	278		43	2021	2061	2101	133	133	133	133	133	133	133	133	133	133	133	133
oil/gas	France	Europe	Western Europe	Vazzio power station	GT1		Ricanto	20	operating	2007		GT	NG					EDF Production Electrique Insulaire SAS [100.0%]	Electricité de France SA [100.0%]	41.9321	8.72044	exact	Ajaccio			Corsica	https://www.gem.wiki/Vazzio_power_station	L100000400109	G100000412913	FR0010242511	1	278		17	2047	2087	2127	20	20	20	20	20	20	20	20	20	20	20	20
oil/gas	France	Europe	Western Europe	Vazzio power station	IC2		Ricanto	125	pre-construction	2026		ICCC	NG/B					EDF Production Electrique Insulaire SAS [100.0%]	Electricité de France SA [100.0%]	41.9321	8.72044	exact	Ajaccio			Corsica	https://www.gem.wiki/Vazzio_power_station	L100000400109	G100000400109	FR0010242511	1	278	278	-2	2066	2106	2146	0	0	0	0	0	0	125	125	125	125	125	125
oil/gas	France	Europe	Western Europe	Vitry-Arrighi power station	1		Centrale thermique à fioul de Vitry-Arrighi	125	operating	1997		GT	HFO/NG					EDF [100.0%]	EDF [100.0%]	48.7865	2.41879	exact	Vitry-sur-Seine			Val-de-Marne	https://www.gem.wiki/Vitry-Arrighi_power_station	L100000406382	G100000406300	FR0010242511	1	250		27	2037	2077	2117	125	125	125	125	125	125	125	125	125	125	125	125
oil/gas	France	Europe	Western Europe	Vitry-Arrighi power station	2		Centrale thermique à fioul de Vitry-Arrighi	125	operating	2007		GT	HFO/NG					EDF [100.0%]	EDF [100.0%]	48.7865	2.41879	exact	Vitry-sur-Seine			Val-de-Marne	https://www.gem.wiki/Vitry-Arrighi_power_station	L100000406382	G100000406299	FR0010242511	1	250	250	17	2047	2087	2127	125	125	125	125	125	125	125	125	125	125	125	125
oil/gas	France	Europe	Western Europe	Vitry-sur-Seine cogeneration power station	1			125	operating	2001		GT	NG					COGETHERM; Paris Urban Heating Company SA	City of Paris; ENGIE SA; Electricité de France SA	48.7892	2.41731	exact	Vitry-sur-Seine			Val-de-Marne	https://www.gem.wiki/Vitry-sur-Seine_cogeneration_power_station	L100000406385	G100000406298	FR0010242511	0.33	125	125	23	2041	2081	2121	41.25	41.25	41.25	41.25	41.25	41.25	41.25	41.25	41.25	41.25	41.25	41.25
oil/gas	United Kingdom	Europe	Northern Europe	West Burton power station	C			299	shelved			GT	NG					EDF Energy [100.0%]	EDF Energy [100.0%]	53.3622	-0.80759	exact	Retford			Nottinghamshire	https://www.gem.wiki/West_Burton_power_station	L100000103762	G100000400806	FR0010242511	1	2487	2487	-99	40	80	120	0	0	0	0	0	0	0	0	0	0	0	0
bioenergy	China	Asia	Eastern Asia	Henan Lingbao power station	1	河南灵宝生物质发电项目		35	operating	2019			bioenergy - agricultural waste (solids); bioenergy - wood & other biomass (solids)					EDF (China) Investment CO LTD[65%]; Lingbao Urban Renovation Investment CO LTD[35%]		34.5514	110.936	exact	Chuankou Town	Lingbao	Sanmenxia	Henan	https://gem.wiki/Henan_Lingbao_power_station	L201644	G202001	FR0010242511	0.65	35	35	5	2059	2099	2139	22.75	22.75	22.75	22.75	22.75	22.75	22.75	22.75	22.75	22.75	22.75	22.75
hydropower	France	Europe	Western Europe	Aussois hydroelectric plant				87	operating	1947		conventional storage				TRUE	FALSE	EDF Energy		45.2518	6.7236	exact		Savoy		Auvergne-Rhône-Alpes	https://gem.wiki/Aussois_hydroelectric_plant	L601620	G601639	FR0010242511	1	87	87	77	1987	2027	2067	87	87	87	87	87	87	87	87	87	87	87	87
hydropower	France	Europe	Western Europe	Bâthie hydroelectric plant			La Bâthie	600	operating	1961		conventional storage				TRUE	FALSE	EDF Energy		45.6452	6.4443	exact		Savoy		Auvergne-Rhône-Alpes	https://gem.wiki/Bâthie_hydroelectric_plant	L601622	G601641	FR0010242511	1	600	600	63	2001	2041	2081	600	600	600	600	600	600	600	600	600	600	600	600
hydropower	France	Europe	Western Europe	Bort hydroelectric plant			Bort les Orgues	235	operating	1952		conventional storage				TRUE	FALSE	EDF Energy		45.4127	2.4986	exact		Cantal		Auvergne-Rhône-Alpes	https://gem.wiki/Bort_hydroelectric_plant	L601627	G601646	FR0010242511	1	235	235	72	1992	2032	2072	235	235	235	235	235	235	235	235	235	235	235	235
hydropower	France	Europe	Western Europe	Brommat hydroelectric plant				406	operating	1933		conventional storage				TRUE	FALSE	EDF Energy		44.7682	2.6834	exact		Aveyron		Occitania	https://gem.wiki/Brommat_hydroelectric_plant	L601629	G601648	FR0010242511	1	406	406	91	1973	2013	2053	406	406	406	406	406	406	406	406	406	406	406	406
hydropower	France	Europe	Western Europe	Chastang hydroelectric plant				293	operating	1951		run-of-river				TRUE	FALSE	EDF Energy		45.1518	2.0098	exact		Corrèze		Nouvelle-Aquitaine	https://gem.wiki/Chastang_hydroelectric_plant	L601631	G601650	FR0010242511	1	293	293	73	1991	2031	2071	293	293	293	293	293	293	293	293	293	293	293	293
hydropower	France	Europe	Western Europe	Châtelard-Vallorcine hydroelectric plant				260	operating	1978		conventional and pumped storage				TRUE	TRUE	Alpiq Suisse SA [50%]; Electricité de France (EDF) [50%]		46.0513	6.9488	exact		Upper Savoy		Auvergne-Rhône-Alpes	https://gem.wiki/Châtelard-Vallorcine_hydroelectric_plant	L604087	G604126	FR0010242511	0.5	260	260	46	2018	2058	2098	130	130	130	130	130	130	130	130	130	130	130	130
hydropower	France	Europe	Western Europe	Cheylas hydroelectric plant			Le Cheylas	485	operating	1979		pumped storage				TRUE	FALSE	EDF Energy		45.3865	6.0013	exact		Isère		Auvergne-Rhône-Alpes	https://gem.wiki/Cheylas_hydroelectric_plant	L601633	G601652	FR0010242511	1	485	485	45	2019	2059	2099	485	485	485	485	485	485	485	485	485	485	485	485
hydropower	France	Europe	Western Europe	Coche hydroelectric plant			La Coche	384	operating	1976		pumped storage				TRUE	FALSE	EDF Energy		45.4968	6.5103	exact		Savoy		Auvergne-Rhône-Alpes	https://gem.wiki/Coche_hydroelectric_plant	L601634	G601653	FR0010242511	1	384	384	48	2016	2056	2096	384	384	384	384	384	384	384	384	384	384	384	384
hydropower	France	Europe	Western Europe	Combe D'Avrieux hydroelectric plant				123	operating	1975		conventional storage				TRUE	FALSE	EDF Energy		45.215	6.712	exact		Savoy		Auvergne-Rhône-Alpes	https://gem.wiki/Combe_D'Avrieux_hydroelectric_plant	L601635	G601654	FR0010242511	1	123	123	49	2015	2055	2095	123	123	123	123	123	123	123	123	123	123	123	123
hydropower	France	Europe	Western Europe	Couesque hydroelectric plant				119	operating	1950		run-of-river				TRUE	FALSE	EDF Energy		44.6953	2.5825	exact		Aveyron		Occitania	https://gem.wiki/Couesque_hydroelectric_plant	L601636	G601655	FR0010242511	1	119	119	74	1990	2030	2070	119	119	119	119	119	119	119	119	119	119	119	119
hydropower	France	Europe	Western Europe	Curbans hydroelectric plant				139	operating	1966		conventional storage				TRUE	FALSE	EDF Energy		47.915	6.0616	exact		Haute-Saône		Bourgogne-Franche-Comté	https://gem.wiki/Curbans_hydroelectric_plant	L601637	G601656	FR0010242511	1	139	139	58	2006	2046	2086	139	139	139	139	139	139	139	139	139	139	139	139
hydropower	France	Europe	Western Europe	Fessenheim hydroelectric plant				175	operating	1956		run-of-river				TRUE	FALSE	EDF Energy		47.9146	7.5706	exact		Haut-Rhin		Grand Est	https://gem.wiki/Fessenheim_hydroelectric_plant	L601638	G601657	FR0010242511	1	175	175	68	1996	2036	2076	175	175	175	175	175	175	175	175	175	175	175	175
hydropower	Switzerland	Europe	Western Europe	Fionnay-Mauvoisin hydroelectric plant				140	operating	1958		conventional storage				TRUE	FALSE	Axpo Holding AG [29.25%]; Forces Motrices de la Suisse Centrale SA (CKW) [19.5%]; Axpo Power AG [19.5%]; BKW FMB Energie SA [19.5%]; Electricité de France (EDF) [9.75%]; Municipality of Bagnes [2.5%]		46.0304	7.308	exact		Entremont		Wallis	https://gem.wiki/Fionnay-Mauvoisin_hydroelectric_plant	L603487	G603522	FR0010242511	0.0975	140	140	66	1998	2038	2078	13.65	13.65	13.65	13.65	13.65	13.65	13.65	13.65	13.65	13.65	13.65	13.65
hydropower	France	Europe	Western Europe	Gerstheim hydroelectric plant				141	operating	1967		run-of-river				TRUE	FALSE	EDF Energy		48.4021	7.7272	exact		Bas-Rhin		Grand Est	https://gem.wiki/Gerstheim_hydroelectric_plant	L601640	G601659	FR0010242511	1	141	141	57	2007	2047	2087	141	141	141	141	141	141	141	141	141	141	141	141
hydropower	France	Europe	Western Europe	Grand Maison hydroelectric plant				1713	operating	1987		pumped storage				TRUE	FALSE	EDF Energy		45.1454	6.0515	exact		Isère		Auvergne-Rhône-Alpes	https://gem.wiki/Grand_Maison_hydroelectric_plant	L601642	G601661	FR0010242511	1	1713	1713	37	2027	2067	2107	1713	1713	1713	1713	1713	1713	1713	1713	1713	1713	1713	1713
hydropower	France	Europe	Western Europe	Hermillon hydroelectric plant				119	operating	1974		run-of-river				TRUE	FALSE	EDF Energy		45.2848	6.3615	exact		Savoy		Auvergne-Rhône-Alpes	https://gem.wiki/Hermillon_hydroelectric_plant	L601644	G601663	FR0010242511	1	119	119	50	2014	2054	2094	119	119	119	119	119	119	119	119	119	119	119	119
hydropower	France	Europe	Western Europe	Iffezheim hydroelectric plant				146	operating	1978		run-of-river				TRUE	TRUE	EnBW Energie Baden-Württemberg AG (EnBW) [50%]; Electricité de France (EDF) [50%]		48.8325	8.1115	exact		Bas-Rhin		Grand Est	https://gem.wiki/Iffezheim_hydroelectric_plant	L604088	G604127	FR0010242511	0.5	146	146	46	2018	2058	2098	73	73	73	73	73	73	73	73	73	73	73	73
hydropower	France	Europe	Western Europe	Kembs hydroelectric plant				162	operating	1932		run-of-river				TRUE	FALSE	EDF Energy		47.6548	7.5183	exact		Haut-Rhin		Grand Est	https://gem.wiki/Kembs_hydroelectric_plant	L601645	G601664	FR0010242511	1	162	162	92	1972	2012	2052	162	162	162	162	162	162	162	162	162	162	162	162
hydropower	Switzerland	Europe	Western Europe	La Batiaz hydroelectric plant				170	operating	1978		conventional storage				TRUE	FALSE	Alpiq Suisse SA [50%]; Electricité de France (EDF) [50%]		46.1098	7.0618	exact		Martigny		Wallis	https://gem.wiki/La_Batiaz_hydroelectric_plant	L603498	G603533	FR0010242511	0.5	170	170	46	2018	2058	2098	85	85	85	85	85	85	85	85	85	85	85	85
hydropower	France	Europe	Western Europe	La Saussaz-II hydroelectric plant			La Saussaz	150	operating	1973		run-of-river				TRUE	FALSE	EDF Energy		45.211	6.475	exact		Savoy		Auvergne-Rhône-Alpes	https://gem.wiki/La_Saussaz-II_hydroelectric_plant	L601648	G601667	FR0010242511	1	150	150	51	2013	2053	2093	150	150	150	150	150	150	150	150	150	150	150	150
hydropower	France	Europe	Western Europe	L'Aigle hydroelectric plant				360	operating	1945		conventional storage				TRUE	FALSE	EDF Energy		45.2438	2.2248	exact		Corrèze		Nouvelle-Aquitaine	https://gem.wiki/L'Aigle_hydroelectric_plant	L601646	G601665	FR0010242511	1	360	360	79	1985	2025	2065	360	360	360	360	360	360	360	360	360	360	360	360
hydropower	France	Europe	Western Europe	Laval De Cere hydroelectric plant			Laval-De-Cere	96	operating	1967		run-of-river				TRUE	FALSE	EDF Energy		44.9532	1.9495	exact		Lot		Occitania	https://gem.wiki/Laval_De_Cere_hydroelectric_plant	L601649	G601668	FR0010242511	1	96	96	57	2007	2047	2087	96	96	96	96	96	96	96	96	96	96	96	96
hydropower	France	Europe	Western Europe	Le Sautet hydroelectric plant				76	operating	1931		conventional storage				TRUE	FALSE	EDF Energy		44.8166	5.9084	exact	Pellafol	Isère		Auvergne-Rhône-Alpes	https://gem.wiki/Le_Sautet_hydroelectric_plant	L601650	G601669	FR0010242511	1	76	76	93	1971	2011	2051	76	76	76	76	76	76	76	76	76	76	76	76
hydropower	France	Europe	Western Europe	Les Brevieres hydroelectric plant			Brevieres	90	operating	1952		conventional storage				TRUE	FALSE	EDF Energy		45.5042	6.9247	exact		Savoy		Auvergne-Rhône-Alpes	https://gem.wiki/Les_Brevieres_hydroelectric_plant	L601651	G601670	FR0010242511	1	90	90	72	1992	2032	2072	90	90	90	90	90	90	90	90	90	90	90	90
hydropower	France	Europe	Western Europe	L'Hospitalet hydroelectric plant			Hospitalet	93	operating	1960		conventional storage				TRUE	FALSE	EDF Energy		42.5879	1.7972	exact		Ariège		Occitania	https://gem.wiki/L'Hospitalet_hydroelectric_plant	L601647	G601666	FR0010242511	1	93	93	64	2000	2040	2080	93	93	93	93	93	93	93	93	93	93	93	93
hydropower	France	Europe	Western Europe	Malgovert hydroelectric plant				297	operating	1953		conventional storage				TRUE	FALSE	EDF Energy		45.6178	6.791	exact		Savoy		Auvergne-Rhône-Alpes	https://gem.wiki/Malgovert_hydroelectric_plant	L601653	G601672	FR0010242511	1	297	297	71	1993	2033	2073	297	297	297	297	297	297	297	297	297	297	297	297
hydropower	France	Europe	Western Europe	Mallemort hydroelectric plant				99	operating	1971		conventional storage				TRUE	FALSE	EDF Energy		43.7161	5.2061	exact		Bouches-du-Rhône		Provence-Alpes-Côte d'Azur	https://gem.wiki/Mallemort_hydroelectric_plant	L601654	G601673	FR0010242511	1	99	99	53	2011	2051	2091	99	99	99	99	99	99	99	99	99	99	99	99
hydropower	France	Europe	Western Europe	Marckolsheim hydroelectric plant				156	operating	1961		run-of-river				TRUE	FALSE	EDF Energy		48.1537	7.5898	exact		Bas-Rhin		Grand Est	https://gem.wiki/Marckolsheim_hydroelectric_plant	L601655	G601674	FR0010242511	1	156	156	63	2001	2041	2081	156	156	156	156	156	156	156	156	156	156	156	156
hydropower	France	Europe	Western Europe	Montahut hydroelectric plant				95	operating	1966		conventional storage				TRUE	FALSE	EDF Energy		43.5708	2.9397	exact		Hérault		Occitania	https://gem.wiki/Montahut_hydroelectric_plant	L601657	G601676	FR0010242511	1	95	95	58	2006	2046	2086	95	95	95	95	95	95	95	95	95	95	95	95
hydropower	France	Europe	Western Europe	Monteynard hydroelectric plant				366	operating	1962		conventional storage				TRUE	FALSE	EDF Energy		44.8722	5.7726	exact		Isère		Auvergne-Rhône-Alpes	https://gem.wiki/Monteynard_hydroelectric_plant	L601658	G601677	FR0010242511	1	366	366	62	2002	2042	2082	366	366	366	366	366	366	366	366	366	366	366	366
hydropower	France	Europe	Western Europe	Montézic hydroelectric plant				910	operating	1982		pumped storage				TRUE	FALSE	EDF Energy		44.7372	2.6432	exact		Aveyron		Occitania	https://gem.wiki/Montézic_hydroelectric_plant	L601659	G601678	FR0010242511	1	910	910	42	2022	2062	2102	910	910	910	910	910	910	910	910	910	910	910	910
hydropower	France	Europe	Western Europe	Montpezat hydroelectric plant				132	operating	1954		conventional storage				TRUE	FALSE	EDF Energy		43.7514	6.0888	exact	Montagnac-Montpezat	Alpes-de-Haute-Provence		Provence-Alpes-Côte d'Azur	https://gem.wiki/Montpezat_hydroelectric_plant	L601660	G601679	FR0010242511	1	132	132	70	1994	2034	2074	132	132	132	132	132	132	132	132	132	132	132	132
hydropower	Malawi	Africa	Sub-Saharan Africa	Mpatamanga Gorge hydroelectric plant			Mpatamanga Main	308	pre-construction	2028		conventional storage				TRUE	FALSE	Electricity Generation CO Malawi LTD [30%]; EDF Energy [27.5%]; Scatec ASA [14%]; British International Investment [13.5%]; Norwegian Norfund [13.5%]		-15.7172	34.7264	exact				Neno	https://gem.wiki/Mpatamanga_Gorge_hydroelectric_plant	L602430	G602461	FR0010242511	0.275	308	308	-4	2068	2108	2148	0	0	0	0	0	0	0	0	0	0	0	0
hydropower	Cameroon	Africa	Sub-Saharan Africa	Nachtigal hydroelectric plant			Nachtigal Amont	420	construction	2024		run-of-river				TRUE	FALSE	EDF Energy [40%]; International Finance CORP (IFC) [20%]; Republic of Cameroon [15%]; Africa50 Infrastructure Fund [15%]; Stoa Infra & Energy [10%]		4.3541	11.6152	exact		Lekié		Centre	https://gem.wiki/Nachtigal_hydroelectric_plant	L600391	G600392	FR0010242511	0.4	420	420	0	2064	2104	2144	0	0	0	0	168	168	168	168	168	168	168	168
hydropower	Laos	Asia	South-eastern Asia	Nam Theun 2 hydroelectric plant			Nam Theun II hydroelectric plant	1070	operating	2020		conventional storage				TRUE	FALSE	Electricité de France (EDF) [35%]; Electricity Generating Public CO LTD (EGCO) [25%]; Government Of Lao People’s Democratic Republic [25%]; Italian-Thai Development PLC [15%]		17.9965	104.954	exact		Khamkeut District		Bolikhamsai	https://gem.wiki/Nam_Theun_2_hydroelectric_plant	L602396	G602426	FR0010242511	0.35	1070	1070	4	2060	2100	2140	374.5	374.5	374.5	374.5	374.5	374.5	374.5	374.5	374.5	374.5	374.5	374.5
hydropower	France	Europe	Western Europe	Oraison hydroelectric plant				188	operating	1962		conventional storage				TRUE	FALSE	EDF Energy		43.9212	5.9253	exact		Alpes-de-Haute-Provence		Provence-Alpes-Côte d'Azur	https://gem.wiki/Oraison_hydroelectric_plant	L601661	G601680	FR0010242511	1	188	188	62	2002	2042	2082	188	188	188	188	188	188	188	188	188	188	188	188
hydropower	France	Europe	Western Europe	Orlu hydroelectric plant				89	operating	1959		conventional storage				TRUE	FALSE	EDF Energy		42.6893	1.9119	exact		Ariège		Occitania	https://gem.wiki/Orlu_hydroelectric_plant	L601662	G601681	FR0010242511	1	89	89	65	1999	2039	2079	89	89	89	89	89	89	89	89	89	89	89	89
hydropower	France	Europe	Western Europe	Ottmarsheim hydroelectric plant				156	operating	1952		run-of-river				TRUE	FALSE	EDF Energy		47.7741	7.5225	exact		Haut-Rhin		Grand Est	https://gem.wiki/Ottmarsheim_hydroelectric_plant	L601663	G601682	FR0010242511	1	156	156	72	1992	2032	2072	156	156	156	156	156	156	156	156	156	156	156	156
hydropower	France	Europe	Western Europe	Passy hydroelectric plant				104	operating	1951		run-of-river				TRUE	FALSE	EDF Energy		45.917	6.7272	exact		Upper Savoy		Auvergne-Rhône-Alpes	https://gem.wiki/Passy_hydroelectric_plant	L601664	G601683	FR0010242511	1	104	104	73	1991	2031	2071	104	104	104	104	104	104	104	104	104	104	104	104
hydropower	French Guiana	Americas	Latin America and the Caribbean	Petit Saut hydroelectric plant				116	operating	1994		conventional storage				TRUE	FALSE	EDF Energy		5.063	-53.0476	exact				French Guiana	https://gem.wiki/Petit_Saut_hydroelectric_plant	L601692	G601711	FR0010242511	1	116	116	30	2034	2074	2114	116	116	116	116	116	116	116	116	116	116	116	116
hydropower	France	Europe	Western Europe	Pied De Borne hydroelectric plant				109	operating	1965		conventional storage				TRUE	FALSE	EDF Energy		44.4788	3.9858	exact		Lozère		Occitania	https://gem.wiki/Pied_De_Borne_hydroelectric_plant	L601665	G601684	FR0010242511	1	109	109	59	2005	2045	2085	109	109	109	109	109	109	109	109	109	109	109	109
hydropower	France	Europe	Western Europe	Pouget hydroelectric plant				447	operating	1951		conventional storage				TRUE	FALSE	EDF Energy		44.0597	2.7701	exact		Aveyron		Occitania	https://gem.wiki/Pouget_hydroelectric_plant	L601667	G601686	FR0010242511	1	447	447	73	1991	2031	2071	447	447	447	447	447	447	447	447	447	447	447	447
hydropower	France	Europe	Western Europe	Pragneres hydroelectric plant				189	operating	1954		conventional storage				TRUE	FALSE	EDF Energy		42.8205	0.0102	exact		Gavarnie-Gèdre		Occitania	https://gem.wiki/Pragneres_hydroelectric_plant	L601668	G601687	FR0010242511	1	189	189	70	1994	2034	2074	189	189	189	189	189	189	189	189	189	189	189	189
hydropower	France	Europe	Western Europe	Randens hydroelectric plant				124	operating	1954		run-of-river				TRUE	FALSE	EDF Energy		45.5275	6.3208	exact		Savoy		Auvergne-Rhône-Alpes	https://gem.wiki/Randens_hydroelectric_plant	L601669	G601688	FR0010242511	1	124	124	70	1994	2034	2074	124	124	124	124	124	124	124	124	124	124	124	124
hydropower	France	Europe	Western Europe	Revin hydroelectric plant			Revin Saint Nicolas	808	operating	1976		pumped storage				TRUE	FALSE	EDF Energy		49.9276	4.6171	exact		Ardennes		Grand Est	https://gem.wiki/Revin_hydroelectric_plant	L601670	G601689	FR0010242511	1	808	808	48	2016	2056	2096	808	808	808	808	808	808	808	808	808	808	808	808
hydropower	France	Europe	Western Europe	Rhinau hydroelectric plant				152	operating	1963		run-of-river				TRUE	FALSE	EDF Energy		48.2844	7.6768	exact		Bas-Rhin		Grand Est	https://gem.wiki/Rhinau_hydroelectric_plant	L601671	G601690	FR0010242511	1	152	152	61	2003	2043	2083	152	152	152	152	152	152	152	152	152	152	152	152
hydropower	Switzerland	Europe	Western Europe	Riddes hydroelectric plant				258	operating	1956		conventional storage				TRUE	FALSE	Axpo Holding AG [29.25%]; Forces Motrices de la Suisse Centrale SA (CKW) [19.5%]; Axpo Power AG [19.5%]; BKW FMB Energie SA [19.5%]; Electricité de France (EDF) [9.75%]; Municipality of Bagnes [2.5%]		46.1574	7.2093	exact		Martigny		Wallis	https://gem.wiki/Riddes_hydroelectric_plant	L603513	G603548	FR0010242511	0.0975	258	258	68	1996	2036	2076	25.155	25.155	25.155	25.155	25.155	25.155	25.155	25.155	25.155	25.155	25.155	25.155
hydropower	France	Europe	Western Europe	Romanche Gavet hydroelectric plant				97	operating	2020		run-of-river				TRUE	FALSE	EDF Energy		45.1172	5.9613	exact	Livet-et-Gavet	Isère		Auvergne-Rhône-Alpes	https://gem.wiki/Romanche_Gavet_hydroelectric_plant	L601672	G601691	FR0010242511	1	97	97	4	2060	2100	2140	97	97	97	97	97	97	97	97	97	97	97	97
hydropower	France	Europe	Western Europe	Saint Chamas hydroelectric plant				159	operating	1966		conventional storage				TRUE	FALSE	EDF Energy		43.529	5.0741	exact		Bouches-du-Rhône		Provence-Alpes-Côte d'Azur	https://gem.wiki/Saint_Chamas_hydroelectric_plant	L601674	G601693	FR0010242511	1	159	159	58	2006	2046	2086	159	159	159	159	159	159	159	159	159	159	159	159
hydropower	France	Europe	Western Europe	Saint Estève hydroelectric plant				146	operating	1963		conventional storage				TRUE	FALSE	EDF Energy		43.692	5.385	exact		Bouches-du-Rhône		Provence-Alpes-Côte d'Azur	https://gem.wiki/Saint_Estève_hydroelectric_plant	L601675	G601694	FR0010242511	1	146	146	61	2003	2043	2083	146	146	146	146	146	146	146	146	146	146	146	146
hydropower	France	Europe	Western Europe	Saint Guillerme hydroelectric plant			Saint Guillerme II	116	operating	1983		conventional storage				TRUE	FALSE	EDF Energy		45.029	6.0717	exact	Auris	Isère		Auvergne-Rhône-Alpes	https://gem.wiki/Saint_Guillerme_hydroelectric_plant	L601676	G601695	FR0010242511	1	116	116	41	2023	2063	2103	116	116	116	116	116	116	116	116	116	116	116	116
hydropower	France	Europe	Western Europe	Saint Pierre Cognet hydroelectric plant				101	operating	1957		run-of-river				TRUE	FALSE	EDF Energy		44.8725	5.7732	exact		Isère		Auvergne-Rhône-Alpes	https://gem.wiki/Saint_Pierre_Cognet_hydroelectric_plant	L601677	G601696	FR0010242511	1	101	101	67	1997	2037	2077	101	101	101	101	101	101	101	101	101	101	101	101
hydropower	France	Europe	Western Europe	Sainte Croix hydroelectric plant				132	operating	1974		conventional storage				TRUE	FALSE	EDF Energy		43.7375	6.1343	exact		Alpes-de-Haute-Provence		Provence-Alpes-Côte d'Azur	https://gem.wiki/Sainte_Croix_hydroelectric_plant	L601680	G601699	FR0010242511	1	132	132	50	2014	2054	2094	132	132	132	132	132	132	132	132	132	132	132	132
hydropower	France	Europe	Western Europe	Sainte Tulle hydroelectric plant			Sainte Tulle I&II	97	operating	1925		conventional storage				TRUE	FALSE	EDF Energy		43.7865	5.774	exact		Alpes-de-Haute-Provence		Provence-Alpes-Côte d'Azur	https://gem.wiki/Sainte_Tulle_hydroelectric_plant	L601681	G601700	FR0010242511	1	97	97	99	1965	2005	2045	97	97	97	97	97	97	97	97	97	97	97	97
hydropower	France	Europe	Western Europe	Saint-Etienne-Cantales hydroelectric plant				103	operating	1945		conventional storage				TRUE	FALSE	EDF Energy		44.9453	2.2184	exact		Cantal		Auvergne-Rhône-Alpes	https://gem.wiki/Saint-Etienne-Cantales_hydroelectric_plant	L601679	G601698	FR0010242511	1	103	103	79	1985	2025	2065	103	103	103	103	103	103	103	103	103	103	103	103
hydropower	France	Europe	Western Europe	Salignac hydroelectric plant				78	operating	1976		conventional storage				TRUE	FALSE	EDF Energy		44.1371	5.9789	exact		Alpes-de-Haute-Provence		Provence-Alpes-Côte d'Azur	https://gem.wiki/Salignac_hydroelectric_plant	L601682	G601701	FR0010242511	1	78	78	48	2016	2056	2096	78	78	78	78	78	78	78	78	78	78	78	78
hydropower	France	Europe	Western Europe	Salon hydroelectric plant				96	operating	1966		conventional storage				TRUE	FALSE	EDF Energy		43.6331	5.1148	exact		Bouches-du-Rhône		Provence-Alpes-Côte d'Azur	https://gem.wiki/Salon_hydroelectric_plant	L601683	G601702	FR0010242511	1	96	96	58	2006	2046	2086	96	96	96	96	96	96	96	96	96	96	96	96
hydropower	France	Europe	Western Europe	Sarrans hydroelectric plant				183	operating	1934		conventional storage				TRUE	FALSE	EDF Energy		44.828	2.7395	exact		Aveyron		Occitania	https://gem.wiki/Sarrans_hydroelectric_plant	L601684	G601703	FR0010242511	1	183	183	90	1974	2014	2054	183	183	183	183	183	183	183	183	183	183	183	183
hydropower	France	Europe	Western Europe	Serre Ponçon hydroelectric plant				384	operating	1960		conventional storage				TRUE	FALSE	EDF Energy		44.4709	6.2696	exact		Hautes-Alpes		Provence-Alpes-Côte d'Azur	https://gem.wiki/Serre_Ponçon_hydroelectric_plant	L601685	G601704	FR0010242511	1	384	384	64	2000	2040	2080	384	384	384	384	384	384	384	384	384	384	384	384
hydropower	Brazil	Americas	Latin America and the Caribbean	Sinop hydroelectric plant		Usina Hidrelétrica Sinop		402	operating	2019		conventional storage				TRUE	FALSE	EDF Norte Fluminense [51%]; Eletrobras Eletronorte [24.5%]; Companhia Hidro Elétrica do São Francisco SA (CHESF) [24.5%]		-11.2667	-55.4501	exact			Região Geográfica Intermediária de Sinop	Mato Grosso	https://gem.wiki/Sinop_hydroelectric_plant	L600349	G600350	FR0010242511	0.51	402	402	5	2059	2099	2139	205.02	205.02	205.02	205.02	205.02	205.02	205.02	205.02	205.02	205.02	205.02	205.02
hydropower	France	Europe	Western Europe	Sisteron hydroelectric plant				240	operating	1975		conventional storage				TRUE	FALSE	EDF Energy		44.2093	5.9186	exact		Alpes-de-Haute-Provence		Provence-Alpes-Côte d'Azur	https://gem.wiki/Sisteron_hydroelectric_plant	L601686	G601705	FR0010242511	1	240	240	49	2015	2055	2095	240	240	240	240	240	240	240	240	240	240	240	240
hydropower	France	Europe	Western Europe	Strasbourg hydroelectric plant				148	operating	1969		run-of-river				TRUE	FALSE	EDF Energy		48.5256	7.7966	exact	Strasbourg	Bas-Rhin		Grand Est	https://gem.wiki/Strasbourg_hydroelectric_plant	L601687	G601706	FR0010242511	1	148	148	55	2009	2049	2089	148	148	148	148	148	148	148	148	148	148	148	148
hydropower	France	Europe	Western Europe	Super Bissorte hydroelectric plant			Bissorte	742	operating	1987		pumped storage				TRUE	FALSE	EDF Energy		45.2047	6.5779	exact		Savoy		Auvergne-Rhône-Alpes	https://gem.wiki/Super_Bissorte_hydroelectric_plant	L601688	G601707	FR0010242511	1	742	742	37	2027	2067	2107	742	742	742	742	742	742	742	742	742	742	742	742
hydropower	France	Europe	Western Europe	Villarodin hydroelectric plant			Mont-Cenis	364	operating	1968		conventional storage				TRUE	FALSE	EDF Energy		45.2128	6.7164	exact		Savoy		Auvergne-Rhône-Alpes	https://gem.wiki/Villarodin_hydroelectric_plant	L601689	G601708	FR0010242511	1	364	364	56	2008	2048	2088	364	364	364	364	364	364	364	364	364	364	364	364
hydropower	France	Europe	Western Europe	Vogelgrün hydroelectric plant				141	operating	1959		run-of-river				TRUE	FALSE	EDF Energy		48.0199	7.5733	exact		Haut-Rhin		Grand Est	https://gem.wiki/Vogelgrün_hydroelectric_plant	L601690	G601709	FR0010242511	1	141	141	65	1999	2039	2079	141	141	141	141	141	141	141	141	141	141	141	141
hydropower	France	Europe	Western Europe	Vouglans hydroelectric plant				285	operating	1968		conventional storage				TRUE	FALSE	EDF Energy		46.3968	5.6634	exact		Jura		Bourgogne-Franche-Comté	https://gem.wiki/Vouglans_hydroelectric_plant	L601691	G601710	FR0010242511	1	285	285	56	2008	2048	2088	285	285	285	285	285	285	285	285	285	285	285	285
nuclear	France	Europe	Western Europe	Belleville nuclear power plant	1			1363	operating	1988		pressurized water reactor						Electricité De France (EDF)		47.5103	2.87501	exact		Nièvre		Bourgogne-Franche-Comté	https://gem.wiki/Belleville_nuclear_power_plant	L500035	G500060	FR0010242511	1	2726		36	2028	2068	2108	1363	1363	1363	1363	1363	1363	1363	1363	1363	1363	1363	1363
nuclear	France	Europe	Western Europe	Belleville nuclear power plant	2			1363	operating	1989		pressurized water reactor						Electricité De France (EDF)		47.5103	2.87501	exact		Nièvre		Bourgogne-Franche-Comté	https://gem.wiki/Belleville_nuclear_power_plant	L500035	G500061	FR0010242511	1	2726	2726	35	2029	2069	2109	1363	1363	1363	1363	1363	1363	1363	1363	1363	1363	1363	1363
nuclear	France	Europe	Western Europe	Blayais nuclear power plant	1			951	operating	1981		pressurized water reactor						Electricité De France (EDF)		45.256	-0.6932	exact		Gironde		Nouvelle-Aquitaine	https://gem.wiki/Blayais_nuclear_power_plant	L500134	G500293	FR0010242511	1	3804		43	2021	2061	2101	951	951	951	951	951	951	951	951	951	951	951	951
nuclear	France	Europe	Western Europe	Blayais nuclear power plant	2			951	operating	1983		pressurized water reactor						Electricité De France (EDF)		45.256	-0.6932	exact		Gironde		Nouvelle-Aquitaine	https://gem.wiki/Blayais_nuclear_power_plant	L500134	G500294	FR0010242511	1	3804		41	2023	2063	2103	951	951	951	951	951	951	951	951	951	951	951	951
nuclear	France	Europe	Western Europe	Blayais nuclear power plant	3			951	operating	1983		pressurized water reactor						Electricité De France (EDF)		45.256	-0.6932	exact		Gironde		Nouvelle-Aquitaine	https://gem.wiki/Blayais_nuclear_power_plant	L500134	G500295	FR0010242511	1	3804		41	2023	2063	2103	951	951	951	951	951	951	951	951	951	951	951	951
nuclear	France	Europe	Western Europe	Blayais nuclear power plant	4			951	operating	1983		pressurized water reactor						Electricité De France (EDF)		45.256	-0.6932	exact		Gironde		Nouvelle-Aquitaine	https://gem.wiki/Blayais_nuclear_power_plant	L500134	G500296	FR0010242511	1	3804	3804	41	2023	2063	2103	951	951	951	951	951	951	951	951	951	951	951	951
nuclear	United Kingdom	Europe	Northern Europe	Bradwell B nuclear power plant	1			1150	pre-construction			pressurized water reactor						China National Nuclear CORP [66.5%]; EDF Energy [33.5%]		51.7428	0.9047	exact		Essex		England	https://gem.wiki/Bradwell_B_nuclear_power_plant	L500294	G500710	FR0010242511	0.335	1150	1150	-99	40	80	120	0	0	0	0	0	0	0	0	0	0	0	0
nuclear	France	Europe	Western Europe	Bugey nuclear power plant	2			945	operating	1979		pressurized water reactor						Electricité De France (EDF)		45.7973	5.2706	exact		Isère		Auvergne-Rhône-Alpes	https://gem.wiki/Bugey_nuclear_power_plant	L500136	G500303	FR0010242511	1	7024		45	2019	2059	2099	945	945	945	945	945	945	945	945	945	945	945	945
nuclear	France	Europe	Western Europe	Bugey nuclear power plant	3			945	operating	1979		pressurized water reactor						Electricité De France (EDF)		45.7973	5.2706	exact		Isère		Auvergne-Rhône-Alpes	https://gem.wiki/Bugey_nuclear_power_plant	L500136	G500304	FR0010242511	1	7024		45	2019	2059	2099	945	945	945	945	945	945	945	945	945	945	945	945
nuclear	France	Europe	Western Europe	Bugey nuclear power plant	4			917	operating	1979		pressurized water reactor						Electricité De France (EDF)		45.7973	5.2706	exact		Isère		Auvergne-Rhône-Alpes	https://gem.wiki/Bugey_nuclear_power_plant	L500136	G500309	FR0010242511	1	7024		45	2019	2059	2099	917	917	917	917	917	917	917	917	917	917	917	917
nuclear	France	Europe	Western Europe	Bugey nuclear power plant	5			917	operating	1980		pressurized water reactor						Electricité De France (EDF)		45.7973	5.2706	exact		Isère		Auvergne-Rhône-Alpes	https://gem.wiki/Bugey_nuclear_power_plant	L500136	G500310	FR0010242511	1	7024		44	2020	2060	2100	917	917	917	917	917	917	917	917	917	917	917	917
nuclear	France	Europe	Western Europe	Bugey nuclear power plant	6			1650	announced			pressurized water reactor						Electricité De France (EDF)		45.7973	5.2706	exact		Isère		Auvergne-Rhône-Alpes	https://gem.wiki/Bugey_nuclear_power_plant	L500136	G501176	FR0010242511	1	7024		-99	40	80	120	0	0	0	0	0	0	0	0	0	0	0	0
nuclear	France	Europe	Western Europe	Bugey nuclear power plant	7			1650	announced			pressurized water reactor						Electricité De France (EDF)		45.7973	5.2706	exact		Isère		Auvergne-Rhône-Alpes	https://gem.wiki/Bugey_nuclear_power_plant	L500136	G501177	FR0010242511	1	7024	7024	-99	40	80	120	0	0	0	0	0	0	0	0	0	0	0	0
nuclear	France	Europe	Western Europe	Cattenom nuclear power plant	1			1362	operating	1987		pressurized water reactor						Electricité De France (EDF)		49.416	6.2169	exact		Moselle		Grand Est	https://gem.wiki/Cattenom_nuclear_power_plant	L500038	G500066	FR0010242511	1	5448		37	2027	2067	2107	1362	1362	1362	1362	1362	1362	1362	1362	1362	1362	1362	1362
nuclear	France	Europe	Western Europe	Cattenom nuclear power plant	2			1362	operating	1988		pressurized water reactor						Electricité De France (EDF)		49.416	6.2169	exact		Moselle		Grand Est	https://gem.wiki/Cattenom_nuclear_power_plant	L500038	G500067	FR0010242511	1	5448		36	2028	2068	2108	1362	1362	1362	1362	1362	1362	1362	1362	1362	1362	1362	1362
nuclear	France	Europe	Western Europe	Cattenom nuclear power plant	3			1362	operating	1991		pressurized water reactor						Electricité De France (EDF)		49.416	6.2169	exact		Moselle		Grand Est	https://gem.wiki/Cattenom_nuclear_power_plant	L500038	G500068	FR0010242511	1	5448		33	2031	2071	2111	1362	1362	1362	1362	1362	1362	1362	1362	1362	1362	1362	1362
nuclear	France	Europe	Western Europe	Cattenom nuclear power plant	4			1362	operating	1992		pressurized water reactor						Electricité De France (EDF)		49.416	6.2169	exact		Moselle		Grand Est	https://gem.wiki/Cattenom_nuclear_power_plant	L500038	G500069	FR0010242511	1	5448	5448	32	2032	2072	2112	1362	1362	1362	1362	1362	1362	1362	1362	1362	1362	1362	1362
nuclear	France	Europe	Western Europe	Chinon nuclear power plant	B-1			954	operating	1984		pressurized water reactor						Electricité De France (EDF)		47.2254	0.1656	exact		Indre-et-Loire		Centre-Val de Loire	https://gem.wiki/Chinon_nuclear_power_plant	L500133	G500289	FR0010242511	1	3816		40	2024	2064	2104	954	954	954	954	954	954	954	954	954	954	954	954
nuclear	France	Europe	Western Europe	Chinon nuclear power plant	B-2			954	operating	1984		pressurized water reactor						Electricité De France (EDF)		47.2254	0.1656	exact		Indre-et-Loire		Centre-Val de Loire	https://gem.wiki/Chinon_nuclear_power_plant	L500133	G500290	FR0010242511	1	3816		40	2024	2064	2104	954	954	954	954	954	954	954	954	954	954	954	954
nuclear	France	Europe	Western Europe	Chinon nuclear power plant	B-3			954	operating	1987		pressurized water reactor						Electricité De France (EDF)		47.2254	0.1656	exact		Indre-et-Loire		Centre-Val de Loire	https://gem.wiki/Chinon_nuclear_power_plant	L500133	G500291	FR0010242511	1	3816		37	2027	2067	2107	954	954	954	954	954	954	954	954	954	954	954	954
nuclear	France	Europe	Western Europe	Chinon nuclear power plant	B-4			954	operating	1988		pressurized water reactor						Electricité De France (EDF)		47.2254	0.1656	exact		Indre-et-Loire		Centre-Val de Loire	https://gem.wiki/Chinon_nuclear_power_plant	L500133	G500292	FR0010242511	1	3816	3816	36	2028	2068	2108	954	954	954	954	954	954	954	954	954	954	954	954
nuclear	France	Europe	Western Europe	Chooz nuclear power plant	B-1			1560	operating	2000		pressurized water reactor						Electricité De France (EDF)		50.0901	4.7872	exact		Ardennes		Grand Est	https://gem.wiki/Chooz_nuclear_power_plant	L500007	G500010	FR0010242511	1	3120		24	2040	2080	2120	1560	1560	1560	1560	1560	1560	1560	1560	1560	1560	1560	1560
nuclear	France	Europe	Western Europe	Chooz nuclear power plant	B-2			1560	operating	2000		pressurized water reactor						Electricité De France (EDF)		50.0901	4.7872	exact		Ardennes		Grand Est	https://gem.wiki/Chooz_nuclear_power_plant	L500007	G500011	FR0010242511	1	3120	3120	24	2040	2080	2120	1560	1560	1560	1560	1560	1560	1560	1560	1560	1560	1560	1560
nuclear	France	Europe	Western Europe	Civaux nuclear power plant	1			1561	operating	2002		pressurized water reactor						Electricité De France (EDF)		46.4555	0.6582	exact		Vienne		Nouvelle-Aquitaine	https://gem.wiki/Civaux_nuclear_power_plant	L500006	G500008	FR0010242511	1	3122		22	2042	2082	2122	1561	1561	1561	1561	1561	1561	1561	1561	1561	1561	1561	1561
nuclear	France	Europe	Western Europe	Civaux nuclear power plant	2			1561	operating	2002		pressurized water reactor						Electricité De France (EDF)		46.4555	0.6582	exact		Vienne		Nouvelle-Aquitaine	https://gem.wiki/Civaux_nuclear_power_plant	L500006	G500009	FR0010242511	1	3122	3122	22	2042	2082	2122	1561	1561	1561	1561	1561	1561	1561	1561	1561	1561	1561	1561
nuclear	France	Europe	Western Europe	Cruas nuclear power plant	1			956	operating	1984		pressurized water reactor						Electricité De France (EDF)		44.6325	4.7546	exact		Ardèche		Auvergne-Rhône-Alpes	https://gem.wiki/Cruas_nuclear_power_plant	L500130	G500279	FR0010242511	1	2868		40	2024	2064	2104	956	956	956	956	956	956	956	956	956	956	956	956
nuclear	France	Europe	Western Europe	Cruas nuclear power plant	3			956	operating	1984		pressurized water reactor						Electricité De France (EDF)		44.6325	4.7546	exact		Ardèche		Auvergne-Rhône-Alpes	https://gem.wiki/Cruas_nuclear_power_plant	L500130	G500281	FR0010242511	1	2868		40	2024	2064	2104	956	956	956	956	956	956	956	956	956	956	956	956
nuclear	France	Europe	Western Europe	Cruas nuclear power plant	4			956	operating	1985		pressurized water reactor						Electricité De France (EDF)		44.6325	4.7546	exact		Ardèche		Auvergne-Rhône-Alpes	https://gem.wiki/Cruas_nuclear_power_plant	L500130	G500282	FR0010242511	1	2868	2868	39	2025	2065	2105	956	956	956	956	956	956	956	956	956	956	956	956
nuclear	France	Europe	Western Europe	Dampierre nuclear power plant	1			937	operating	1980		pressurized water reactor						Electricité De France (EDF)		47.7321	2.5185	exact		Loiret		Centre-Val de Loire	https://gem.wiki/Dampierre_nuclear_power_plant	L500137	G500305	FR0010242511	1	3748		44	2020	2060	2100	937	937	937	937	937	937	937	937	937	937	937	937
nuclear	France	Europe	Western Europe	Dampierre nuclear power plant	2			937	operating	1981		pressurized water reactor						Electricité De France (EDF)		47.7321	2.5185	exact		Loiret		Centre-Val de Loire	https://gem.wiki/Dampierre_nuclear_power_plant	L500137	G500306	FR0010242511	1	3748		43	2021	2061	2101	937	937	937	937	937	937	937	937	937	937	937	937
nuclear	France	Europe	Western Europe	Dampierre nuclear power plant	3			937	operating	1981		pressurized water reactor						Electricité De France (EDF)		47.7321	2.5185	exact		Loiret		Centre-Val de Loire	https://gem.wiki/Dampierre_nuclear_power_plant	L500137	G500307	FR0010242511	1	3748		43	2021	2061	2101	937	937	937	937	937	937	937	937	937	937	937	937
nuclear	France	Europe	Western Europe	Dampierre nuclear power plant	4			937	operating	1981		pressurized water reactor						Electricité De France (EDF)		47.7321	2.5185	exact		Loiret		Centre-Val de Loire	https://gem.wiki/Dampierre_nuclear_power_plant	L500137	G500308	FR0010242511	1	3748	3748	43	2021	2061	2101	937	937	937	937	937	937	937	937	937	937	937	937
nuclear	United Kingdom	Europe	Northern Europe	Dungeness nuclear power plant	B1			615	retired	1985	2021	gas-cooled reactor						EDF Energy		50.9138	0.9597	exact	Folkestone and Hythe District	Kent		England	https://gem.wiki/Dungeness_nuclear_power_plant	L500372	G501023	FR0010242511	1	1230		39	2025	2065	2105	615	0	0	0	0	0	0	0	0	0	0	0
nuclear	United Kingdom	Europe	Northern Europe	Dungeness nuclear power plant	B2			615	retired	1989	2021	gas-cooled reactor						EDF Energy		50.9138	0.9597	exact	Folkestone and Hythe District	Kent		England	https://gem.wiki/Dungeness_nuclear_power_plant	L500372	G501024	FR0010242511	1	1230	1230	35	2029	2069	2109	615	0	0	0	0	0	0	0	0	0	0	0
nuclear	France	Europe	Western Europe	Fessenheim nuclear power plant	1			920	retired	1978	2020	pressurized water reactor						Electricité De France (EDF)		47.9032	7.5609	exact		Haut-Rhin		Grand Est	https://gem.wiki/Fessenheim_nuclear_power_plant	L500129	G500277	FR0010242511	1	1840		46	2018	2058	2098	0	0	0	0	0	0	0	0	0	0	0	0
nuclear	France	Europe	Western Europe	Fessenheim nuclear power plant	2			920	retired	1978	2020	pressurized water reactor						Electricité De France (EDF)		47.9032	7.5609	exact		Haut-Rhin		Grand Est	https://gem.wiki/Fessenheim_nuclear_power_plant	L500129	G500278	FR0010242511	1	1840	1840	46	2018	2058	2098	0	0	0	0	0	0	0	0	0	0	0	0
nuclear	France	Europe	Western Europe	Flamanville nuclear power plant	1			1382	operating	1986		pressurized water reactor						Electricité De France (EDF)		49.5366	-1.8823	exact		Manche		Normandy	https://gem.wiki/Flamanville_nuclear_power_plant	L500005	G500050	FR0010242511	1	4414		38	2026	2066	2106	1382	1382	1382	1382	1382	1382	1382	1382	1382	1382	1382	1382
nuclear	France	Europe	Western Europe	Flamanville nuclear power plant	2			1382	operating	1987		pressurized water reactor						Electricité De France (EDF)		49.5366	-1.8823	exact		Manche		Normandy	https://gem.wiki/Flamanville_nuclear_power_plant	L500005	G500051	FR0010242511	1	4414		37	2027	2067	2107	1382	1382	1382	1382	1382	1382	1382	1382	1382	1382	1382	1382
nuclear	France	Europe	Western Europe	Flamanville nuclear power plant	3			1650	construction			pressurized water reactor						Electricité De France (EDF)		49.5366	-1.8823	exact		Manche		Normandy	https://gem.wiki/Flamanville_nuclear_power_plant	L500005	G500007	FR0010242511	1	4414	4414	-99	40	80	120	0	0	0	0	0	0	0	1650	1650	1650	1650	1650
nuclear	France	Europe	Western Europe	Golfech nuclear power plant	1			1363	operating	1991		pressurized water reactor						Electricité De France (EDF)		44.106	0.8443	exact		Tarn-et-Garonne		Occitania	https://gem.wiki/Golfech_nuclear_power_plant	L500036	G500062	FR0010242511	1	2726		33	2031	2071	2111	1363	1363	1363	1363	1363	1363	1363	1363	1363	1363	1363	1363
nuclear	France	Europe	Western Europe	Golfech nuclear power plant	2			1363	operating	1994		pressurized water reactor						Electricité De France (EDF)		44.106	0.8443	exact		Tarn-et-Garonne		Occitania	https://gem.wiki/Golfech_nuclear_power_plant	L500036	G500063	FR0010242511	1	2726	2726	30	2034	2074	2114	1363	1363	1363	1363	1363	1363	1363	1363	1363	1363	1363	1363
nuclear	France	Europe	Western Europe	Gravelines nuclear power plant	1			951	operating	1980		pressurized water reactor						Electricité De France (EDF)		51.0141	2.1332	exact		Nord		Hauts-de-France	https://gem.wiki/Gravelines_nuclear_power_plant	L500135	G500297	FR0010242511	1	9006		44	2020	2060	2100	951	951	951	951	951	951	951	951	951	951	951	951
nuclear	France	Europe	Western Europe	Gravelines nuclear power plant	2			951	operating	1980		pressurized water reactor						Electricité De France (EDF)		51.0141	2.1332	exact		Nord		Hauts-de-France	https://gem.wiki/Gravelines_nuclear_power_plant	L500135	G500298	FR0010242511	1	9006		44	2020	2060	2100	951	951	951	951	951	951	951	951	951	951	951	951
nuclear	France	Europe	Western Europe	Gravelines nuclear power plant	3			951	operating	1981		pressurized water reactor						Electricité De France (EDF)		51.0141	2.1332	exact		Nord		Hauts-de-France	https://gem.wiki/Gravelines_nuclear_power_plant	L500135	G500299	FR0010242511	1	9006		43	2021	2061	2101	951	951	951	951	951	951	951	951	951	951	951	951
nuclear	France	Europe	Western Europe	Gravelines nuclear power plant	4			951	operating	1981		pressurized water reactor						Electricité De France (EDF)		51.0141	2.1332	exact		Nord		Hauts-de-France	https://gem.wiki/Gravelines_nuclear_power_plant	L500135	G500300	FR0010242511	1	9006		43	2021	2061	2101	951	951	951	951	951	951	951	951	951	951	951	951
nuclear	France	Europe	Western Europe	Gravelines nuclear power plant	5			951	operating	1985		pressurized water reactor						Electricité De France (EDF)		51.0141	2.1332	exact		Nord		Hauts-de-France	https://gem.wiki/Gravelines_nuclear_power_plant	L500135	G500301	FR0010242511	1	9006		39	2025	2065	2105	951	951	951	951	951	951	951	951	951	951	951	951
nuclear	France	Europe	Western Europe	Gravelines nuclear power plant	6			951	operating	1985		pressurized water reactor						Electricité De France (EDF)		51.0141	2.1332	exact		Nord		Hauts-de-France	https://gem.wiki/Gravelines_nuclear_power_plant	L500135	G500302	FR0010242511	1	9006		39	2025	2065	2105	951	951	951	951	951	951	951	951	951	951	951	951
nuclear	France	Europe	Western Europe	Gravelines nuclear power plant	7			1650	announced			pressurized water reactor						Electricité De France (EDF)		51.0141	2.1332	exact		Nord		Hauts-de-France	https://gem.wiki/Gravelines_nuclear_power_plant	L500135	G501178	FR0010242511	1	9006		-99	40	80	120	0	0	0	0	0	0	0	0	0	0	0	0
nuclear	France	Europe	Western Europe	Gravelines nuclear power plant	8			1650	announced			pressurized water reactor						Electricité De France (EDF)		51.0141	2.1332	exact		Nord		Hauts-de-France	https://gem.wiki/Gravelines_nuclear_power_plant	L500135	G501179	FR0010242511	1	9006	9006	-99	40	80	120	0	0	0	0	0	0	0	0	0	0	0	0
nuclear	United Kingdom	Europe	Northern Europe	Hartlepool nuclear power plant	A1			655	operating	1989		gas-cooled reactor						EDF Energy		54.6341	-1.1801	exact		Hartlepool	Tees Valley	England	https://gem.wiki/Hartlepool_nuclear_power_plant	L500373	G501025	FR0010242511	1	1310		35	2029	2069	2109	655	655	655	655	655	655	655	655	655	655	655	655
nuclear	United Kingdom	Europe	Northern Europe	Hartlepool nuclear power plant	A2			655	operating	1989		gas-cooled reactor						EDF Energy		54.6341	-1.1801	exact		Hartlepool	Tees Valley	England	https://gem.wiki/Hartlepool_nuclear_power_plant	L500373	G501026	FR0010242511	1	1310	1310	35	2029	2069	2109	655	655	655	655	655	655	655	655	655	655	655	655
nuclear	United Kingdom	Europe	Northern Europe	Heysham nuclear power plant	A1			625	operating	1989		gas-cooled reactor						EDF Energy		54.0295	-2.9149	exact	Lancaster	Lancashire		England	https://gem.wiki/Heysham_nuclear_power_plant	L500374	G501027	FR0010242511	1	2610		35	2029	2069	2109	625	625	625	625	625	625	625	625	625	625	625	625
nuclear	United Kingdom	Europe	Northern Europe	Heysham nuclear power plant	A2			625	operating	1989		gas-cooled reactor						EDF Energy		54.0295	-2.9149	exact	Lancaster	Lancashire		England	https://gem.wiki/Heysham_nuclear_power_plant	L500374	G501028	FR0010242511	1	2610		35	2029	2069	2109	625	625	625	625	625	625	625	625	625	625	625	625
nuclear	United Kingdom	Europe	Northern Europe	Heysham nuclear power plant	B1			680	operating	1989		gas-cooled reactor						EDF Energy		54.031	-2.9112	exact	Lancaster	Lancashire		England	https://gem.wiki/Heysham_nuclear_power_plant	L500374	G501029	FR0010242511	1	2610		35	2029	2069	2109	680	680	680	680	680	680	680	680	680	680	680	680
nuclear	United Kingdom	Europe	Northern Europe	Heysham nuclear power plant	B2			680	operating	1989		gas-cooled reactor						EDF Energy		54.031	-2.9112	exact	Lancaster	Lancashire		England	https://gem.wiki/Heysham_nuclear_power_plant	L500374	G501030	FR0010242511	1	2610	2610	35	2029	2069	2109	680	680	680	680	680	680	680	680	680	680	680	680
nuclear	United Kingdom	Europe	Northern Europe	Hinkley Point nuclear power plant	B2			655	retired	1976	2022	gas-cooled reactor						EDF Energy		51.2085	-3.1334	exact	Somerset West and Taunton	Somerset		England	https://gem.wiki/Hinkley_Point_nuclear_power_plant	L500375	G501034	FR0010242511	1	4750		48	2016	2056	2096	655	655	0	0	0	0	0	0	0	0	0	0
nuclear	United Kingdom	Europe	Northern Europe	Hinkley Point nuclear power plant	B1			655	retired	1978	2022	gas-cooled reactor						EDF Energy		51.2085	-3.1334	exact	Somerset West and Taunton	Somerset		England	https://gem.wiki/Hinkley_Point_nuclear_power_plant	L500375	G501033	FR0010242511	1	4750		46	2018	2058	2098	655	655	0	0	0	0	0	0	0	0	0	0
nuclear	United Kingdom	Europe	Northern Europe	Hinkley Point nuclear power plant	C1			1720	construction			pressurized water reactor						EDF Energy; China General Nuclear		51.2063	-3.1423	exact	Somerset West and Taunton	Somerset		England	https://gem.wiki/Hinkley_Point_nuclear_power_plant	L500375	G501035	FR0010242511	0.5	4750		-99	40	80	120	0	0	0	0	0	0	0	860	860	860	860	860
nuclear	United Kingdom	Europe	Northern Europe	Hinkley Point nuclear power plant	C2			1720	construction			pressurized water reactor						EDF Energy; China General Nuclear		51.2063	-3.1423	exact	Somerset West and Taunton	Somerset		England	https://gem.wiki/Hinkley_Point_nuclear_power_plant	L500375	G501036	FR0010242511	0.5	4750	4750	-99	40	80	120	0	0	0	0	0	0	0	860	860	860	860	860
nuclear	United Kingdom	Europe	Northern Europe	Hunterston nuclear power plant	B1			644	retired	1976	2021	gas-cooled reactor						EDF Energy		55.7229	-4.8913	exact		North Ayrshire		Scotland	https://gem.wiki/Hunterston_nuclear_power_plant	L500376	G501039	FR0010242511	1	1288		48	2016	2056	2096	644	0	0	0	0	0	0	0	0	0	0	0
nuclear	United Kingdom	Europe	Northern Europe	Hunterston nuclear power plant	B2			644	retired	1977	2022	gas-cooled reactor						EDF Energy		55.7229	-4.8913	exact		North Ayrshire		Scotland	https://gem.wiki/Hunterston_nuclear_power_plant	L500376	G501040	FR0010242511	1	1288	1288	47	2017	2057	2097	644	644	0	0	0	0	0	0	0	0	0	0
nuclear	United States	Americas	Northern America	Nine Mile Point nuclear power plant	1			642	operating	1969		boiling water reactor						Exelon Nuclear; Electricité De France (EDF)		43.5205	-76.4068	exact		Oswego County		New York	https://gem.wiki/Nine_Mile_Point_nuclear_power_plant	L500009	G500403	FR0010242511	0.5	1962		55	2009	2049	2089	321	321	321	321	321	321	321	321	321	321	321	321
nuclear	United States	Americas	Northern America	Nine Mile Point nuclear power plant	2			1320	operating	1988		boiling water reactor						Exelon Nuclear; Electricité De France (EDF)		43.5205	-76.4068	exact		Oswego County		New York	https://gem.wiki/Nine_Mile_Point_nuclear_power_plant	L500009	G500015	FR0010242511	0.5	1962	1962	36	2028	2068	2108	660	660	660	660	660	660	660	660	660	660	660	660
nuclear	France	Europe	Western Europe	Nogent nuclear power plant	1			1363	operating	1988		pressurized water reactor						Electricité De France (EDF)		48.5171	3.5181	exact		Aube		Grand Est	https://gem.wiki/Nogent_nuclear_power_plant	L500037	G500064	FR0010242511	1	2726		36	2028	2068	2108	1363	1363	1363	1363	1363	1363	1363	1363	1363	1363	1363	1363
nuclear	France	Europe	Western Europe	Nogent nuclear power plant	2			1363	operating	1989		pressurized water reactor						Electricité De France (EDF)		48.5171	3.5181	exact		Aube		Grand Est	https://gem.wiki/Nogent_nuclear_power_plant	L500037	G500065	FR0010242511	1	2726	2726	35	2029	2069	2109	1363	1363	1363	1363	1363	1363	1363	1363	1363	1363	1363	1363
nuclear	France	Europe	Western Europe	Paluel nuclear power plant	1			1382	operating	1985		pressurized water reactor						Electricité De France (EDF)		49.8582	0.6354	exact		Seine-Maritime		Normandy	https://gem.wiki/Paluel_nuclear_power_plant	L500032	G500052	FR0010242511	1	5528		39	2025	2065	2105	1382	1382	1382	1382	1382	1382	1382	1382	1382	1382	1382	1382
nuclear	France	Europe	Western Europe	Paluel nuclear power plant	2			1382	operating	1985		pressurized water reactor						Electricité De France (EDF)		49.8582	0.6354	exact		Seine-Maritime		Normandy	https://gem.wiki/Paluel_nuclear_power_plant	L500032	G500053	FR0010242511	1	5528		39	2025	2065	2105	1382	1382	1382	1382	1382	1382	1382	1382	1382	1382	1382	1382
nuclear	France	Europe	Western Europe	Paluel nuclear power plant	3			1382	operating	1986		pressurized water reactor						Electricité De France (EDF)		49.8582	0.6354	exact		Seine-Maritime		Normandy	https://gem.wiki/Paluel_nuclear_power_plant	L500032	G500054	FR0010242511	1	5528		38	2026	2066	2106	1382	1382	1382	1382	1382	1382	1382	1382	1382	1382	1382	1382
nuclear	France	Europe	Western Europe	Paluel nuclear power plant	4			1382	operating	1986		pressurized water reactor						Electricité De France (EDF)		49.8582	0.6354	exact		Seine-Maritime		Normandy	https://gem.wiki/Paluel_nuclear_power_plant	L500032	G500055	FR0010242511	1	5528	5528	38	2026	2066	2106	1382	1382	1382	1382	1382	1382	1382	1382	1382	1382	1382	1382
nuclear	France	Europe	Western Europe	Penly nuclear power plant	1			1382	operating	1990		pressurized water reactor						Electricité De France (EDF)		49.9764	1.2107	exact	Petit-Caux	Seine-Maritime		Normandy	https://gem.wiki/Penly_nuclear_power_plant	L500033	G500056	FR0010242511	1	6064		34	2030	2070	2110	1382	1382	1382	1382	1382	1382	1382	1382	1382	1382	1382	1382
nuclear	France	Europe	Western Europe	Penly nuclear power plant	2			1382	operating	1992		pressurized water reactor						Electricité De France (EDF)		49.9764	1.2107	exact	Petit-Caux	Seine-Maritime		Normandy	https://gem.wiki/Penly_nuclear_power_plant	L500033	G500057	FR0010242511	1	6064		32	2032	2072	2112	1382	1382	1382	1382	1382	1382	1382	1382	1382	1382	1382	1382
nuclear	France	Europe	Western Europe	Penly nuclear power plant	3			1650	pre-construction			pressurized water reactor						Electricité De France (EDF)		49.9764	1.2107	exact	Petit-Caux	Seine-Maritime		Normandy	https://gem.wiki/Penly_nuclear_power_plant	L500033	G501185	FR0010242511	1	6064		-99	40	80	120	0	0	0	0	0	0	0	0	0	0	0	0
nuclear	France	Europe	Western Europe	Penly nuclear power plant	4			1650	pre-construction			pressurized water reactor						Electricité De France (EDF)		49.9764	1.2107	exact	Petit-Caux	Seine-Maritime		Normandy	https://gem.wiki/Penly_nuclear_power_plant	L500033	G501186	FR0010242511	1	6064	6064	-99	40	80	120	0	0	0	0	0	0	0	0	0	0	0	0
nuclear	France	Europe	Western Europe	Saint-Laurent nuclear power plant	B-1		Saint-Laurent B	956	operating	1983		pressurized water reactor						Electricité De France (EDF)		47.7197	1.5783	exact		Loir-et-Cher		Centre-Val de Loire	https://gem.wiki/Saint-Laurent_nuclear_power_plant	L500131	G500283	FR0010242511	1	1912		41	2023	2063	2103	956	956	956	956	956	956	956	956	956	956	956	956
nuclear	France	Europe	Western Europe	Saint-Laurent nuclear power plant	B-2		Saint-Laurent B	956	operating	1983		pressurized water reactor						Electricité De France (EDF)		47.7197	1.5783	exact		Loir-et-Cher		Centre-Val de Loire	https://gem.wiki/Saint-Laurent_nuclear_power_plant	L500131	G500284	FR0010242511	1	1912	1912	41	2023	2063	2103	956	956	956	956	956	956	956	956	956	956	956	956
nuclear	United Kingdom	Europe	Northern Europe	Sizewell C nuclear power plant	1			1600	pre-construction			pressurized water reactor						EDF Energy [50%]; UK government [50%]		52.2199	1.6203	exact	East Suffolk	Suffolk		England	https://gem.wiki/Sizewell_C_nuclear_power_plant	L500293	G500708	FR0010242511	0.5	3200		-99	40	80	120	0	0	0	0	0	0	0	0	0	0	0	0
nuclear	United Kingdom	Europe	Northern Europe	Sizewell C nuclear power plant	2			1600	pre-construction			pressurized water reactor						EDF Energy [50%]; UK government [50%]		52.2199	1.6203	exact	East Suffolk	Suffolk		England	https://gem.wiki/Sizewell_C_nuclear_power_plant	L500293	G500709	FR0010242511	0.5	3200	3200	-99	40	80	120	0	0	0	0	0	0	0	0	0	0	0	0
nuclear	United Kingdom	Europe	Northern Europe	Sizewell nuclear power plant	B			1250	operating	1995		pressurized water reactor						EDF Energy		52.2145	1.6206	exact	East Suffolk	Suffolk		England	https://gem.wiki/Sizewell_nuclear_power_plant	L500378	G501045	FR0010242511	1	1250	1250	29	2035	2075	2115	1250	1250	1250	1250	1250	1250	1250	1250	1250	1250	1250	1250
nuclear	France	Europe	Western Europe	St. Alban nuclear power plant	1		Saint-Alban	1381	operating	1986		pressurized water reactor						Electricité De France (EDF)		45.4043	4.7554	exact		Isère		Auvergne-Rhône-Alpes	https://gem.wiki/St._Alban_nuclear_power_plant	L500034	G500058	FR0010242511	1	2762		38	2026	2066	2106	1381	1381	1381	1381	1381	1381	1381	1381	1381	1381	1381	1381
nuclear	France	Europe	Western Europe	St. Alban nuclear power plant	2		Saint-Alban	1381	operating	1987		pressurized water reactor						Electricité De France (EDF)		45.4043	4.7554	exact		Isère		Auvergne-Rhône-Alpes	https://gem.wiki/St._Alban_nuclear_power_plant	L500034	G500059	FR0010242511	1	2762	2762	37	2027	2067	2107	1381	1381	1381	1381	1381	1381	1381	1381	1381	1381	1381	1381
nuclear	China	Asia	Eastern Asia	Taishan nuclear power plant	1-1	台山核电站		1750	operating	2018		pressurized water reactor						Taishan Nuclear Power Industry Investment CO LTD [47.5%]; EDF International [25%]; China General Nuclear Power CO LTD [12.5%]; Guangdong Nuclear Power Investment CO LTD [10%]; EDF (China) Investment LTD [5%]		21.861	112.925	exact	Chixi Town	Taishan	Jiangmen	Guangdong	https://gem.wiki/Taishan_nuclear_power_plant	L500298	G500726	FR0010242511	0.25	5800		6	2058	2098	2138	437.5	437.5	437.5	437.5	437.5	437.5	437.5	437.5	437.5	437.5	437.5	437.5
nuclear	China	Asia	Eastern Asia	Taishan nuclear power plant	1-2	台山核电站		1750	operating	2019		pressurized water reactor						Taishan Nuclear Power Industry Investment CO LTD [47.5%]; EDF International [25%]; China General Nuclear Power CO LTD [12.5%]; Guangdong Nuclear Power Investment CO LTD [10%]; EDF (China) Investment LTD [5%]		21.861	112.925	exact	Chixi Town	Taishan	Jiangmen	Guangdong	https://gem.wiki/Taishan_nuclear_power_plant	L500298	G500725	FR0010242511	0.25	5800		5	2059	2099	2139	437.5	437.5	437.5	437.5	437.5	437.5	437.5	437.5	437.5	437.5	437.5	437.5
nuclear	China	Asia	Eastern Asia	Taishan nuclear power plant	2-3	台山核电站		1150	announced			pressurized water reactor						Taishan Nuclear Power Industry Investment CO LTD [47.5%]; EDF International [25%]; China General Nuclear Power CO LTD [12.5%]; Guangdong Nuclear Power Investment CO LTD [10%]; EDF (China) Investment LTD [5%]		21.861	112.925	approximate	Chixi Town	Taishan	Jiangmen	Guangdong	https://gem.wiki/Taishan_nuclear_power_plant	L500298	G501118	FR0010242511	0.25	5800		-99	40	80	120	0	0	0	0	0	0	0	0	0	0	0	0
nuclear	China	Asia	Eastern Asia	Taishan nuclear power plant	2-4	台山核电站		1150	announced			pressurized water reactor						Taishan Nuclear Power Industry Investment CO LTD [47.5%]; EDF International [25%]; China General Nuclear Power CO LTD [12.5%]; Guangdong Nuclear Power Investment CO LTD [10%]; EDF (China) Investment LTD [5%]		21.861	112.925	approximate	Chixi Town	Taishan	Jiangmen	Guangdong	https://gem.wiki/Taishan_nuclear_power_plant	L500298	G501119	FR0010242511	0.25	5800	5800	-99	40	80	120	0	0	0	0	0	0	0	0	0	0	0	0
nuclear	United Kingdom	Europe	Northern Europe	Torness nuclear power plant	1			682	operating	1988		gas-cooled reactor						EDF Energy		55.9679	-2.4086	exact		East Lothian		Scotland	https://gem.wiki/Torness_nuclear_power_plant	L500188	G500434	FR0010242511	1	1364		36	2028	2068	2108	682	682	682	682	682	682	682	682	682	682	682	682
nuclear	United Kingdom	Europe	Northern Europe	Torness nuclear power plant	2			682	operating	1989		gas-cooled reactor						EDF Energy		55.9679	-2.4086	exact		East Lothian		Scotland	https://gem.wiki/Torness_nuclear_power_plant	L500188	G500435	FR0010242511	1	1364	1364	35	2029	2069	2109	682	682	682	682	682	682	682	682	682	682	682	682
nuclear	France	Europe	Western Europe	Tricastin nuclear power plant	1			955	operating	1980		pressurized water reactor						Electricité De France (EDF)		44.3311	4.7311	exact		Drôme		Auvergne-Rhône-Alpes	https://gem.wiki/Tricastin_nuclear_power_plant	L500132	G500285	FR0010242511	1	3820		44	2020	2060	2100	955	955	955	955	955	955	955	955	955	955	955	955
nuclear	France	Europe	Western Europe	Tricastin nuclear power plant	2			955	operating	1980		pressurized water reactor						Electricité De France (EDF)		44.3311	4.7311	exact		Drôme		Auvergne-Rhône-Alpes	https://gem.wiki/Tricastin_nuclear_power_plant	L500132	G500286	FR0010242511	1	3820		44	2020	2060	2100	955	955	955	955	955	955	955	955	955	955	955	955
nuclear	France	Europe	Western Europe	Tricastin nuclear power plant	3			955	operating	1981		pressurized water reactor						Electricité De France (EDF)		44.3311	4.7311	exact		Drôme		Auvergne-Rhône-Alpes	https://gem.wiki/Tricastin_nuclear_power_plant	L500132	G500287	FR0010242511	1	3820		43	2021	2061	2101	955	955	955	955	955	955	955	955	955	955	955	955
nuclear	France	Europe	Western Europe	Tricastin nuclear power plant	4			955	operating	1981		pressurized water reactor						Electricité De France (EDF)		44.3311	4.7311	exact		Drôme		Auvergne-Rhône-Alpes	https://gem.wiki/Tricastin_nuclear_power_plant	L500132	G500288	FR0010242511	1	3820	#REF!	43	2021	2061	2101	955	955	955	955	955	955	955	955	955	955	955	955
solar	United Arab Emirates	Asia	Western Asia	Al Dhafra solar farm	2	محطة الظفرة للطاقة الشمسية الكهروضوئية		2000	operating	2022		PV						Abu Dhabi National Energy Company (TAQA) [40%]; Masdar Clean Energy [20%]; EDF Renewables [20%]; Jinko Power Technology CO LTD [20%]		24.1456	54.5139	approximate			Al Dhafra	Emirate of Abu Dhabi	https://gem.wiki/Al_Dhafra_solar_farm	L804030	G804601	FR0010242511	0.2	2000	2000	2	2062	2102	2142	0	0	400	400	400	400	400	400	400	400	400	400
solar	United States	Americas	Northern America	American Robin Solar Project				120	pre-construction	2025		PV						EDF Renewables		37.019	-86.0346	approximate		Barren County		Kentucky	https://gem.wiki/American_Robin_Solar_Project	L805016	G805785	FR0010242511	1	120	120	-1	2065	2105	2145	0	0	0	0	0	0	0	0	0	0	0	0
solar	Canada	Americas	Northern America	Arnprior solar farm			Arnprior Solar Generating Station	23	operating	2010		PV						EDF Renewables		45.4083	-76.271	exact	West Carleton	Ottawa	Eastern Ontario	Ontario	https://gem.wiki/Arnprior_solar_farm	L804425	G805082	FR0010242511	1	23	23	14	2050	2090	2130	23	23	23	23	23	23	23	23	23	23	23	23
solar	United States	Americas	Northern America	Arrow Canyon Solar Hybrid				200	operating	2022		PV						EDF Renewables		36.4593	-114.844	exact	Moapa	Clark County		Nevada	https://gem.wiki/Arrow_Canyon_Solar_Hybrid	L804427	G805084	FR0010242511	1	200	200	2	2062	2102	2142	0	0	200	200	200	200	200	200	200	200	200	200
solar	Israel	Asia	Western Asia	Ashalim PV solar farm	1		Ashalim Sun	35	operating	2018		PV						EDF Renewables [50%]; Clal Sun LTD [50%]		30.9782	34.7475	exact	Ramat Negev Regional Council		Beersheba Subdistrict	South District	https://gem.wiki/Ashalim_PV_solar_farm	L809106	G811430	FR0010242511	0.5	77		6	2058	2098	2138	17.5	17.5	17.5	17.5	17.5	17.5	17.5	17.5	17.5	17.5	17.5	17.5
solar	Israel	Asia	Western Asia	Ashalim PV solar farm	2			42	operating	2023		PV						EDF Renewables		30.9611	34.6645	exact	Ramat Negev Regional Council		Beersheba Subdistrict	South District	https://gem.wiki/Ashalim_PV_solar_farm	L809106	G811431	FR0010242511	1	77	77	1	2063	2103	2143	0	0	0	42	42	42	42	42	42	42	42	42
solar	Egypt	Africa	Northern Africa	Benban Elsewedy/EDF solar farm	PV 1			65	operating	2019		PV						Elsewedy Electric; EDF Renewables		24.418	32.693	exact	Benban	Markaz Deraw		Aswan Governorate	https://gem.wiki/Benban_Elsewedy/EDF_solar_farm	L800179	G800223	FR0010242511	0.5	130		5	2059	2099	2139	32.5	32.5	32.5	32.5	32.5	32.5	32.5	32.5	32.5	32.5	32.5	32.5
solar	Egypt	Africa	Northern Africa	Benban Elsewedy/EDF solar farm	PV 2			65	operating	2019		PV						Elsewedy Electric; EDF Renewables		24.418	32.693	approximate	Benban	Markaz Deraw		Aswan Governorate	https://gem.wiki/Benban_Elsewedy/EDF_solar_farm	L800179	G800224	FR0010242511	0.5	130	130	5	2059	2099	2139	32.5	32.5	32.5	32.5	32.5	32.5	32.5	32.5	32.5	32.5	32.5	32.5
solar	United States	Americas	Northern America	Big Beau Solar				128	operating	2022		PV						EDF Renewables		34.907	-118.344	exact	Kern			California	https://gem.wiki/Big_Beau_Solar	L805018	G805787	FR0010242511	1	128	128	2	2062	2102	2142	0	0	128	128	128	128	128	128	128	128	128	128
solar	United Kingdom	Europe	Northern Europe	Bloy’s Grove solar farm			Bloyís Grove Solar Farm	50	pre-construction			PV						EDF Renewables		52.5519	1.2671	exact		Norfolk	Eastern	England	https://gem.wiki/Bloy’s_Grove_solar_farm	L825174	G828460	FR0010242511	1	50		-99	40	80	120	0	0	0	0	0	0	0	0	0	0	0	0
solar	United States	Americas	Northern America	Blue Marmot Solar				50	shelved			PV						EDF Renewables		42.5617	-120.757	approximate	Lakeveiw	Lake County		Oregon	https://gem.wiki/Blue_Marmot_Solar	L804428	G805085	FR0010242511	1	50	50	-99	40	80	120	0	0	0	0	0	0	0	0	0	0	0	0
solar	Mexico	Americas	Latin America and the Caribbean	Bluemex Power Solar Project	1	Proyecto Solar Bluemex Power		120	operating	2019		PV						EDF Renewables		27.9973	-110.713	exact		Empalme		Sonora	https://gem.wiki/Bluemex_Power_Solar_Project	L807127	G808280	FR0010242511	1	120	120	5	2059	2099	2139	120	120	120	120	120	120	120	120	120	120	120	120
solar	Ireland	Europe	Northern Europe	Blusheens solar farm				8	operating	2023		PV						EDF Renewables		52.2563	-6.4565	approximate	Killinick				https://gem.wiki/Blusheens_solar_farm	L822765	G825830	FR0010242511	1	8	8	1	2063	2103	2143	0	0	0	8	8	8	8	8	8	8	8	8
solar	United States	Americas	Northern America	Bradley Solar Project				120	pre-construction	2027		PV						EDF Renewables		45.3623	-68.5051	approximate		Penobscot County		Maine	https://gem.wiki/Bradley_Solar_Project	L805019	G805788	FR0010242511	1	120	120	-3	2067	2107	2147	0	0	0	0	0	0	0	0	0	0	0	0
solar	United Kingdom	Europe	Northern Europe	Burwell solar farm				50	construction	2023		PV						EDF Renewables		52.284	0.304	exact	East Cambridgeshire	Cambridgeshire	Eastern	England	https://gem.wiki/Burwell_solar_farm	L806224	G807155	FR0010242511	1	50	50	1	2063	2103	2143	0	0	0	50	50	50	50	50	50	50	50	50
solar	United States	Americas	Northern America	Byron Solar Project				200	pre-construction	2025		PV						EDF Renewables		44.0175	-92.8678	approximate		Dodge County		Minnesota	https://gem.wiki/Byron_Solar_Project	L805020	G805789	FR0010242511	1	200	200	-1	2065	2105	2145	0	0	0	0	0	0	0	0	0	0	0	0
solar	Chile	Americas	Latin America and the Caribbean	CEME solar farm	1	Parque Solar CEME		480	construction	2024		PV						EDF Energie Nouvelles		-23.6645	-70.3475	approximate				Antofagasta	https://gem.wiki/CEME_solar_farm	L807979	G810076	FR0010242511	1	480	480	0	2064	2104	2144	0	0	0	0	480	480	480	480	480	480	480	480
solar	United States	Americas	Northern America	Chipmunk Solar				400	announced	2024		PV						EDF Renewables; Geenex Solar		39.6725	-83.0373	approximate		Pickaway County		Ohio	https://gem.wiki/Chipmunk_Solar	L805037	G805808	FR0010242511	0.5	400	400	0	2064	2104	2144	0	0	0	0	0	0	0	0	0	0	0	0
solar	United States	Americas	Northern America	Chuckwalla Solar				200	pre-construction	2025		PV						EDF Renewables		36.5162	-114.697	exact	North las Vegas	Clark County		Nevada	https://gem.wiki/Chuckwalla_Solar	L804429	G805086	FR0010242511	1	200	200	-1	2065	2105	2145	0	0	0	0	0	0	0	0	0	0	0	0
solar	United States	Americas	Northern America	Columbia (EDF Renewables) solar farm				350	pre-construction	2025		PV						EDF Renewables		42.9112	-75.0704	approximate		Herkimer County	Columbia	New York	https://gem.wiki/Columbia_(EDF_Renewables)_solar_farm	L805021	G805790	FR0010242511	1	350	350	-1	2065	2105	2145	0	0	0	0	0	0	0	0	0	0	0	0
solar	Ireland	Europe	Northern Europe	Coolroe solar farm				5	operating	2023		PV						EDF Renewables		52.2804	-6.8399	approximate	Ballyculane				https://gem.wiki/Coolroe_solar_farm	L822769	G825834	FR0010242511	1	5	5	1	2063	2103	2143	0	0	0	5	5	5	5	5	5	5	5	5
solar	France	Europe	Western Europe	Crucey Solar Power Plant	1			60	operating	2012		PV						EDF Energie Nouvelles		48.6425	1.1023	exact		Eure-et-Loir		Centre-Loire Valley	https://gem.wiki/Crucey_Solar_Power_Plant	L805756	G806624	FR0010242511	1	60	60	12	2052	2092	2132	60	60	60	60	60	60	60	60	60	60	60	60
solar	Ireland	Europe	Northern Europe	Curraghmartin solar farm				4	operating	2023		PV						EDF Renewables		52.2709	-7.2159	approximate	Carrigeen				https://gem.wiki/Curraghmartin_solar_farm	L822770	G825835	FR0010242511	1	4	4	1	2063	2103	2143	0	0	0	4	4	4	4	4	4	4	4	4
solar	United States	Americas	Northern America	Desert Harvest solar farm	1			80	operating	2020		PV						EDF Renewables		33.8001	-115.38	exact		Riverside County		California	https://gem.wiki/Desert_Harvest_solar_farm	L804430	G805088	FR0010242511	1	150		4	2060	2100	2140	80	80	80	80	80	80	80	80	80	80	80	80
solar	United States	Americas	Northern America	Desert Harvest solar farm	2			70	operating	2020		PV						EDF Renewables		33.8001	-115.38	exact		Riverside County		California	https://gem.wiki/Desert_Harvest_solar_farm	L804430	G805087	FR0010242511	1	150	150	4	2060	2100	2140	70	70	70	70	70	70	70	70	70	70	70	70
solar	United States	Americas	Northern America	Desert Quartzite solar farm				300	construction	2024		PV						EDF Renewables		33.565	-114.753	exact	Blythe	Riverside County		California	https://gem.wiki/Desert_Quartzite_solar_farm	L804477	G805148	FR0010242511	1	300	300	0	2064	2104	2144	0	0	0	0	300	300	300	300	300	300	300	300
solar	United States	Americas	Northern America	Eastern Cottontail Solar Project				250	pre-construction	2026		PV						EDF Renewables		39.7739	-82.6136	approximate		Fairfield County		Ohio	https://gem.wiki/Eastern_Cottontail_Solar_Project	L808421	G810639	FR0010242511	1	250	250	-2	2066	2106	2146	0	0	0	0	0	0	0	0	0	0	0	0
solar	United States	Americas	Northern America	Edora C solar farm				20	shelved			PV						EDF Renewables		41.393	-74.4657	approximate			Wawayanda	New York	https://gem.wiki/Edora_C_solar_farm	L805363	G806193	FR0010242511	1	20	20	-99	40	80	120	0	0	0	0	0	0	0	0	0	0	0	0
solar	Canada	Americas	Northern America	Elmsley East / West solar farm			Elmsley	24	operating	2010		PV						EDF Renewables		44.8483	-76.0692	exact	Rideau Lakes	Leeds and Grenville Counties	Eastern Ontario	Ontario	https://gem.wiki/Elmsley_East_/_West_solar_farm	L804426	G805083	FR0010242511	1	24	24	14	2050	2090	2130	24	24	24	24	24	24	24	24	24	24	24	24
solar	United States	Americas	Northern America	Estill Solar				20	operating	2017		PV						EDF Renewables		32.7638	-81.2422	exact	Estill	Hampton County		South Carolina	https://gem.wiki/Estill_Solar	L804431	G805089	FR0010242511	1	20	20	7	2057	2097	2137	20	20	20	20	20	20	20	20	20	20	20	20
solar	United States	Americas	Northern America	Fox Squirrel Solar				577	pre-construction	2024		PV						EDF Renewables		39.7832	-83.3451	exact		Madison County		Ohio	https://gem.wiki/Fox_Squirrel_Solar	L805022	G805791	FR0010242511	1	577	577	0	2064	2104	2144	0	0	0	0	0	0	0	0	0	0	0	0
solar	France	Europe	Western Europe	Gabardan Solar Power Plant	1			65	operating	2010		PV						EDF Energie Nouvelles		44.0586	-0.0127	exact		Landes		New Aquitaine	https://gem.wiki/Gabardan_Solar_Power_Plant	L805757	G806625	FR0010242511	1	65	65	14	2050	2090	2130	65	65	65	65	65	65	65	65	65	65	65	65
solar	United States	Americas	Northern America	Genesee Road solar farm				250	pre-construction	2027		PV						EDF Renewables		42.8857	-78.877	approximate	Sardiana	Erie County		New York	https://gem.wiki/Genesee_Road_solar_farm	L805023	G805792	FR0010242511	1	250	250	-3	2067	2107	2147	0	0	0	0	0	0	0	0	0	0	0	0
solar	United Kingdom	Europe	Northern Europe	Glassthorpe Hill solar farm			Glassthorpe Hill Flore - Solar Farm	50	pre-construction			PV						EDF Renewables		52.2476	-1.0469	exact		Northamptonshire	East Midlands	England	https://gem.wiki/Glassthorpe_Hill_solar_farm	L825616	G828932	FR0010242511	1	50	50	-99	40	80	120	0	0	0	0	0	0	0	0	0	0	0	0
solar	United States	Americas	Northern America	Holliday Creek Solar				118	operating	2022		PV						EDF Renewables		42.5687	-94.1028	exact	Fort Dodge	Webster County		Iowa	https://gem.wiki/Holliday_Creek_Solar	L804598	G805293	FR0010242511	1	118	118	2	2062	2102	2142	0	0	118	118	118	118	118	118	118	118	118	118
solar	United States	Americas	Northern America	Homer solar farm			Homer Cortland	90	pre-construction	2025		PV						EDF Renewables		42.6587	-76.0999	approximate	Homer	Cortland County		New York	https://gem.wiki/Homer_solar_farm	L805024	G805793	FR0010242511	1	90	90	-1	2065	2105	2145	0	0	0	0	0	0	0	0	0	0	0	0
solar	Peru	Americas	Latin America and the Caribbean	Iquitos (EDF) solar farm		Parque Solar Iquitos (EDF)		100	announced	2026		PV						EDF Renewables		-3.7149	-73.2442	approximate	Punchana			Loreto	https://gem.wiki/Iquitos_(EDF)_solar_farm	L808299	G810471	FR0010242511	1	100	100	-2	2066	2106	2146	0	0	0	0	0	0	0	0	0	0	0	0
solar	Saudi Arabia	Asia	Western Asia	Jeddah Solar Project		محطة جدة للطاقة الشمسية, محطة نور جنوب جدة	Third Jeddah Solar, South Jeddah Noor solar farm	300	construction			PV						Masdar Clean Energy; EDF Renewables; Nesma Holding CO LTD		21.4837	39.1729	approximate	Third Jeddah Industrial City			Jeddah	https://gem.wiki/Jeddah_Solar_Project	L804083	G804665	FR0010242511	0.33	300	300	-99	40	80	120	0	0	0	0	0	0	0	99	99	99	99	99
solar	United States	Americas	Northern America	K-Junction Solar				310	pre-construction	2026		PV						EDF Renewables		41.1091	-98.0141	approximate				Nebraska	https://gem.wiki/K-Junction_Solar	L805025	G805794	FR0010242511	1	310	310	-2	2066	2106	2146	0	0	0	0	0	0	0	0	0	0	0	0
solar	Greece	Europe	Southern Europe	Kokoraiika solar farm		Κοκοραιικα		2.7	operating			PV						EDF Renewables Greece		38.4228	22.2902	exact	Municipal Unit of Galaxidi	Regional Unit of Phocis	Central Greece	Thessaly and Central Greece	https://gem.wiki/Kokoraiika_solar_farm	L822467	G825523	FR0010242511	1	2.7	2.7	-99	40	80	120	2.7	2.7	2.7	2.7	2.7	2.7	2.7	2.7	2.7	2.7	2.7	2.7
solar	Greece	Europe	Southern Europe	Labrainas solar farm		Λαμπραινας		1.8	operating			PV						EDF Renewables Greece		36.8662	22.6335	exact		Laconia Regional Unit	Peloponnese Region	Peloponnese, Western Greece and the Ionian	https://gem.wiki/Labrainas_solar_farm	L822504	G825561	FR0010242511	1	1.8	1.8	-99	40	80	120	1.8	1.8	1.8	1.8	1.8	1.8	1.8	1.8	1.8	1.8	1.8	1.8
solar	United States	Americas	Northern America	Lake Trout Solar Project				245	pre-construction	2025		PV						EDF Renewables; Geenex Solar		40.4693	-85.3306	approximate		Blackford County		Indiana	https://gem.wiki/Lake_Trout_Solar_Project	L805038	G805809	FR0010242511	0.5	245	245	-1	2065	2105	2145	0	0	0	0	0	0	0	0	0	0	0	0
solar	France	Europe	Western Europe	Lazer Solar Power Facility				20	construction	2023		PV						EDF Energie Nouvelles		44.346	5.8572	approximate	Lazer			Hautes-Alpes	https://gem.wiki/Lazer_Solar_Power_Facility	L805760	G806628	FR0010242511	1	20	20	1	2063	2103	2143	0	0	0	20	20	20	20	20	20	20	20	20
solar	United Kingdom	Europe	Northern Europe	Longfield solar farm			Longfield	500	pre-construction			PV						EDF Renewables; Padero Solar (PS) Renewables		51.7832	0.545	exact		Essex	Eastern	England	https://gem.wiki/Longfield_solar_farm	L825925	G829261	FR0010242511	0.5	500	500	-99	40	80	120	0	0	0	0	0	0	0	0	0	0	0	0
solar	United States	Americas	Northern America	Louise Solar				50	announced	2024		PV						EDF Renewables		43.6832	-92.7537	approximate		Mower County		Minnesota	https://gem.wiki/Louise_Solar	L805026	G805795	FR0010242511	1	50	50	0	2064	2104	2144	0	0	0	0	0	0	0	0	0	0	0	0
solar	Australia	Oceania	Australia and New Zealand	Malabar solar farm			Maxwell solar farm	25	pre-construction			PV						Malabar Resources LTD; EDF Renewables		-31.876	147.287	approximate			Upper Hunter Valley	New South Wales	https://gem.wiki/Malabar_solar_farm	L805617	G806462	FR0010242511	0.5	25	25	-99	40	80	120	0	0	0	0	0	0	0	0	0	0	0	0
solar	Israel	Asia	Western Asia	Mashabai Sadeh solar farm			Mashabei Sadei PV plant	60	operating	2018		PV						EDF Renewables		31.0119	34.7594	exact	Ramat Negev Regional Council		Beersheba Subdistrict	South District	https://gem.wiki/Mashabai_Sadeh_solar_farm	L804056	G804633	FR0010242511	1	60	60	6	2058	2098	2138	60	60	60	60	60	60	60	60	60	60	60	60
solar	France	Europe	Western Europe	Massangis Solar Power Plant	1			56	operating	2012		PV						EDF Energie Nouvelles		47.634	3.9655	exact		Yonne		Bourgogne-Franche-Comté	https://gem.wiki/Massangis_Solar_Power_Plant	L805758	G806626	FR0010242511	1	56	56	12	2052	2092	2132	56	56	56	56	56	56	56	56	56	56	56	56
solar	United States	Americas	Northern America	Maverick Solar	1		Palen Solar	125	operating	2020		PV						EDF Renewables		33.7001	-115.38	exact		Riverside County		California	https://gem.wiki/Maverick_Solar	L804433	G805096	FR0010242511	1	457		4	2060	2100	2140	125	125	125	125	125	125	125	125	125	125	125	125
solar	United States	Americas	Northern America	Maverick Solar	4		Palen Solar	100	operating	2020		PV						EDF Renewables		33.7001	-115.38	exact		Riverside County		California	https://gem.wiki/Maverick_Solar	L804433	G805095	FR0010242511	1	457		4	2060	2100	2140	100	100	100	100	100	100	100	100	100	100	100	100
solar	United States	Americas	Northern America	Maverick Solar	6		Palen Solar	100	operating	2021		PV						EDF Renewables [50%]; MEAG [50%]		33.7001	-115.38	exact	Desert Center	Riverside County		California	https://gem.wiki/Maverick_Solar	L804433	G805806	FR0010242511	0.5	457		3	2061	2101	2141	0	50	50	50	50	50	50	50	50	50	50	50
solar	United States	Americas	Northern America	Maverick Solar	7		Palen Solar	132	operating	2021		PV						EDF Renewables [50%]; MEAG [50%]		33.7001	-115.38	exact	Desert Center	Riverside County		California	https://gem.wiki/Maverick_Solar	L804433	G805807	FR0010242511	0.5	457	457	3	2061	2101	2141	0	66	66	66	66	66	66	66	66	66	66	66
solar	South Africa	Africa	Sub-Saharan Africa	Mogalakwena Mine solar farm				100	pre-construction	2024		PV						EDF Renewables; Pele Energy Group; Community Owned - Anglo American Platinum Community Trust [10%]		-23.9785	28.9124	approximate	Mogalakwena Local Municipality	Waterberg District Municipality		Limpopo	https://gem.wiki/Mogalakwena_Mine_solar_farm	L811657	G814213	FR0010242511	0.33	100	100	0	2064	2104	2144	0	0	0	0	0	0	0	0	0	0	0	0
solar	United States	Americas	Northern America	Moraine solar farm				94	pre-construction	2025		PV						EDF Renewables		42.4298	-77.725	approximate		Burns County	Allegany	New York	https://gem.wiki/Moraine_solar_farm	L805027	G805796	FR0010242511	1	94	94	-1	2065	2105	2145	0	0	0	0	0	0	0	0	0	0	0	0
solar	United States	Americas	Northern America	Morris Ridge solar farm				177	pre-construction	2024		PV						EDF Renewables		42.7338	-77.8836	approximate		Livingston County	Mount Morris	New York	https://gem.wiki/Morris_Ridge_solar_farm	L805028	G805797	FR0010242511	1	177	177	0	2064	2104	2144	0	0	0	0	0	0	0	0	0	0	0	0
solar	Laos	Asia	South-eastern Asia	Nam Theun 2 solar farm			NT2-Solar, Nam Theun floating solar power project, Nam Theun-2 Solar	240	pre-construction	2024		PV						Electricité De France (EDF); Lao Holding State Enterprise (LHSE); Electricity Generating PCL (EGCO); Innosea		17.9965	104.954	approximate				Khammouane	https://gem.wiki/Nam_Theun_2_solar_farm	L801183	G801363	FR0010242511	0.25	240	240	0	2064	2104	2144	0	0	0	0	0	0	0	0	0	0	0	0
solar	Morocco	Africa	Northern Africa	Noor Midelt II solar farm	2-Solar Thermal	محطة نور ميدلت للطاقة الشمسية ٢		115	shelved			Solar Thermal						EDF Renewables [35%]; Abu Dhabi Future Energy CO [30%]; Moroccan Agency for Sustainable Energy (MASEN) [25%]; Green Of Africa [10%]		32.8838	-4.7101	approximate	Draa-Tafilalet	Atlas Mountains			https://gem.wiki/Noor_Midelt_II_solar_farm	L827475	G800290	FR0010242511	0.35	115	115	-99	40	80	120	0	0	0	0	0	0	0	0	0	0	0	0
solar	Morocco	Africa	Northern Africa	Noor Midelt solar farm	1-PV	محطة نور ميدلت للطاقة الشمسية ١		400	construction	2024		PV						Masdar Clean Energy; EDF Renewables; Green of Africa; MASEN		32.8838	-4.7101	approximate	Midelt		Midelt Province		https://gem.wiki/Noor_Midelt_solar_farm	L800243	G814166	FR0010242511	0.25	800		0	2064	2104	2144	0	0	0	0	100	100	100	100	100	100	100	100
solar	Morocco	Africa	Northern Africa	Noor Midelt solar farm	1-Solar Thermal	محطة نور ميدلت للطاقة الشمسية ١		400	construction	2024		Solar Thermal						Masdar Clean Energy; EDF Renewables; Green of Africa; MASEN		32.8838	-4.7101	approximate	Midelt		Midelt Province		https://gem.wiki/Noor_Midelt_solar_farm	L800243	G800289	FR0010242511	0.25	800	800	0	2064	2104	2144	0	0	0	0	100	100	100	100	100	100	100	100
solar	United Kingdom	Europe	Northern Europe	North Anglesey Solar			Rhyd y Groes solar farm, Porth Wen solar farm, Rhyd y Groes	50	construction	2023		PV						EDF Renewables		53.4057	-4.4202	exact		Isle of Anglesey		Wales	https://gem.wiki/North_Anglesey_Solar	L806223	G807154	FR0010242511	1	50	50	1	2063	2103	2143	0	0	0	50	50	50	50	50	50	50	50	50
solar	United States	Americas	Northern America	Northern Bobwhite Solar Project				96	pre-construction	2025		PV						EDF Renewables		37.5414	-85.265	approximate		Marion County		Kentucky	https://gem.wiki/Northern_Bobwhite_Solar_Project	L805029	G805798	FR0010242511	1	96	96	-1	2065	2105	2145	0	0	0	0	0	0	0	0	0	0	0	0
solar	Chile	Americas	Latin America and the Caribbean	Peldehue solar farm		Parque Solar Peldehue		120	pre-construction			PV						EDF Renewables		-33.2224	-70.5591	approximate	Colina	Provincia de Chacabuco		Santiago Metropolitan Region	https://gem.wiki/Peldehue_solar_farm	L808001	G810101	FR0010242511	1	120	120	-99	40	80	120	0	0	0	0	0	0	0	0	0	0	0	0
solar	Brazil	Americas	Latin America and the Caribbean	Pirapora Solar Complex	1	Complexo Solar Pirapora	Vazante	192	operating	2017		PV						EDF Renewables; Omega Geração		-17.4068	-44.9186	exact	Pirapora		Região Geográfica Intermediária de Montes Claros	Minas Gerais	https://gem.wiki/Pirapora_Solar_Complex	L807126	G808277	FR0010242511	0.5	396		7	2057	2097	2137	96	96	96	96	96	96	96	96	96	96	96	96
solar	Brazil	Americas	Latin America and the Caribbean	Pirapora Solar Complex	2	Complexo Solar Pirapora	Vazante	112	operating	2017		PV						EDF Renewables; Omega Geração		-17.4086	-44.8736	exact	Pirapora		Região Geográfica Intermediária de Montes Claros	Minas Gerais	https://gem.wiki/Pirapora_Solar_Complex	L807126	G808278	FR0010242511	0.5	396		7	2057	2097	2137	56	56	56	56	56	56	56	56	56	56	56	56
solar	Brazil	Americas	Latin America and the Caribbean	Pirapora Solar Complex	3	Complexo Solar Pirapora	Vazante	92	operating	2018		PV						EDF Renewables; Omega Geração		-17.4087	-44.8854	exact	Pirapora		Região Geográfica Intermediária de Montes Claros	Minas Gerais	https://gem.wiki/Pirapora_Solar_Complex	L807126	G808279	FR0010242511	0.5	396	396	6	2058	2098	2138	46	46	46	46	46	46	46	46	46	46	46	46
solar	United States	Americas	Northern America	Playa Solar 1	1		Switch Station 1, Switch Solar	79	operating	2017		PV						EDF Renewables		36.408	-114.908	exact		Clark County		Nevada	https://gem.wiki/Playa_Solar_1	L804434	G805097	FR0010242511	1	179		7	2057	2097	2137	79	79	79	79	79	79	79	79	79	79	79	79
solar	United States	Americas	Northern America	Playa Solar 1	2		Switch Station 2, Switch Solar	100	operating	2017		PV						EDF Renewables		36.408	-114.908	exact		Clark County		Nevada	https://gem.wiki/Playa_Solar_1	L804434	G810728	FR0010242511	1	179	179	7	2057	2097	2137	100	100	100	100	100	100	100	100	100	100	100	100
solar	United States	Americas	Northern America	Red House Solar				500	pre-construction	2025		PV						EDF Renewables		41.45	-118.13	approximate		Humbolt County		Nevada	https://gem.wiki/Red_House_Solar	L805030	G805799	FR0010242511	1	500	500	-1	2065	2105	2145	0	0	0	0	0	0	0	0	0	0	0	0
solar	French Guiana	Americas	Latin America and the Caribbean	Rewatt solar farm		Parque Solar Rewatt		2.7	operating	2011		PV						EDF Renewables		3.8368	-54.1571	approximate				French Guiana	https://gem.wiki/Rewatt_solar_farm	L832469	G838029	FR0010242511	1	2.7	2.7	13	2051	2091	2131	2.7	2.7	2.7	2.7	2.7	2.7	2.7	2.7	2.7	2.7	2.7	2.7
solar	United States	Americas	Northern America	Rich Road solar farm				240	pre-construction	2025		PV						EDF Renewables		44.5942	-75.1814	approximate		St. Lawrence County	Canton	New York	https://gem.wiki/Rich_Road_solar_farm	L805031	G805800	FR0010242511	1	240	240	-1	2065	2105	2145	0	0	0	0	0	0	0	0	0	0	0	0
solar	United States	Americas	Northern America	Ridge View solar farm				350	pre-construction	2025		PV						EDF Renewables		43.2921	-78.5686	approximate		Niagara County	Hartland	New York	https://gem.wiki/Ridge_View_solar_farm	L805032	G805801	FR0010242511	1	350	350	-1	2065	2105	2145	0	0	0	0	0	0	0	0	0	0	0	0
solar	United States	Americas	Northern America	Rosalen solar farm				200	pre-construction	2027		PV						EDF Renewables		43.1569	-77.0384	approximate		Wayne County	Rose	New York	https://gem.wiki/Rosalen_solar_farm	L805033	G805802	FR0010242511	1	200	200	-3	2067	2107	2147	0	0	0	0	0	0	0	0	0	0	0	0
solar	Mexico	Americas	Latin America and the Caribbean	Santa Lucia solar farm		Planta Soalr Santa Lucia		198	pre-construction			PV						EDF Renewables		19.8234	-90.5249	approximate				Campeche	https://gem.wiki/Santa_Lucia_solar_farm	L832583	G838154	FR0010242511	1	198	198	-99	40	80	120	0	0	0	0	0	0	0	0	0	0	0	0
solar	United States	Americas	Northern America	Sawtooth (Arizona) Solar				250	announced	2026		PV						EDF Renewables		32.7199	-111.62	approximate		Pinal County		Arizona	https://gem.wiki/Sawtooth_(Arizona)_Solar	L833248	G838940	FR0010242511	1	250	250	-2	2066	2106	2146	0	0	0	0	0	0	0	0	0	0	0	0
solar	United States	Americas	Northern America	Sculpin Solar				180	announced	2025		PV						EDF Renewables		41.3646	-84.8438	approximate		DeKalb County		Indiana	https://gem.wiki/Sculpin_Solar	L833251	G838943	FR0010242511	1	180	180	-1	2065	2105	2145	0	0	0	0	0	0	0	0	0	0	0	0
solar	China	Asia	Eastern Asia	Shandong Zhongxing Zhufuzhuang Reservior Fishery solar farm	1	新泰市汶南镇重兴水库、东都镇祝福庄水库100MW渔光互补项目（第一期）	Xintai City Wennan Town Chongxing Reservoir and Dongdu Town Fuzhuang Reservoir 100MW Fishery and Solar Complementary Project	50	shelved			PV						EDF Renewables China Investment II (HK) LTD		35.8084	117.74	approximate	Wennan Town	Xintai	Tai'an	Shandong	https://gem.wiki/Shandong_Zhongxing_Zhufuzhuang_Reservior_Fishery_solar_farm	L811265	G813737	FR0010242511	1	50	50	-99	40	80	120	0	0	0	0	0	0	0	0	0	0	0	0
solar	French Guiana	Americas	Latin America and the Caribbean	Sioulé solar farm		Parque Solar Sioulé		1.3	operating	2011		PV						EDF Renewables		5.041	-52.4982	approximate				French Guiana	https://gem.wiki/Sioulé_solar_farm	L832470	G838030	FR0010242511	1	1.3	1.3	13	2051	2091	2131	1.3	1.3	1.3	1.3	1.3	1.3	1.3	1.3	1.3	1.3	1.3	1.3
solar	United States	Americas	Northern America	Space City Solar				345	construction			PV						EDF Renewables		29.5535	-96.2105	approximate		Wharton County		Texas	https://gem.wiki/Space_City_Solar	L805034	G805803	FR0010242511	1	345	345	-99	40	80	120	0	0	0	0	0	0	0	345	345	345	345	345
solar	United Kingdom	Europe	Northern Europe	Springwell solar farm				800	announced			PV						EDF Renewables; Luminous Energy LTD		53.225	-0.5722	approximate	Lincoln			England	https://gem.wiki/Springwell_solar_farm	L826431	G829806	FR0010242511	0.5	800	800	-99	40	80	120	0	0	0	0	0	0	0	0	0	0	0	0
solar	Canada	Americas	Northern America	St. Isidore A solar project				12	operating			PV						EDF Energies Nouvelles		45.4289	-74.9374	exact	St Isidore			Ontario	https://gem.wiki/St._Isidore_A_solar_project	L832038	G837575	FR0010242511	1	12		-99	40	80	120	12	12	12	12	12	12	12	12	12	12	12	12
solar	Canada	Americas	Northern America	St. Isidore B solar project				12	operating			PV						EDF Energies Nouvelles		45.3637	-74.9092	exact	St Isidore			Ontario	https://gem.wiki/St._Isidore_B_solar_project	L832039	G837576	FR0010242511	1	12	12	-99	40	80	120	12	12	12	12	12	12	12	12	12	12	12	12
solar	United States	Americas	Northern America	Suffragette solar farm			Seneca County solar farm	20	pre-construction	2025		PV						EDF Renewables		42.9092	-76.7984	approximate			Seneca Falls	New York	https://gem.wiki/Suffragette_solar_farm	L805424	G806256	FR0010242511	1	20	20	-1	2065	2105	2145	0	0	0	0	0	0	0	0	0	0	0	0
solar	United Kingdom	Europe	Northern Europe	Sutton Bridge solar farm				50	construction			PV						EDF Renewables		52.7875	-0.1516	approximate	Spalding			Lincolnshire	https://gem.wiki/Sutton_Bridge_solar_farm	L806221	G807152	FR0010242511	1	50	50	-99	40	80	120	0	0	0	0	0	0	0	50	50	50	50	50
solar	Ireland	Europe	Northern Europe	TDC Community solar farm				80	pre-construction	2025		PV						EDF Renewables		53.6288	-8.1893	approximate	Roscommon				https://gem.wiki/TDC_Community_solar_farm	L822783	G825849	FR0010242511	1	80	80	-1	2065	2105	2145	0	0	0	0	0	0	0	0	0	0	0	0
solar	Israel	Asia	Western Asia	Timna solar farm				60	operating	2021		PV						EDF Renewables		29.755	35.007	exact	Timna Park	Eliat	Southern District		https://gem.wiki/Timna_solar_farm	L804055	G804632	FR0010242511	1	60	60	3	2061	2101	2141	0	60	60	60	60	60	60	60	60	60	60	60
solar	Greece	Europe	Southern Europe	Tolofonas solar farm		Τολοφωνας		1.1	operating			PV						EDF Renewables Greece		38.3845	22.2176	exact	Municipal Unit of Tolofona	Regional Unit of Phocis	Central Greece	Thessaly and Central Greece	https://gem.wiki/Tolofonas_solar_farm	L822699	G825764	FR0010242511	1	1.1	1.1	-99	40	80	120	1.1	1.1	1.1	1.1	1.1	1.1	1.1	1.1	1.1	1.1	1.1	1.1
solar	United States	Americas	Northern America	Toms River solar farm			EDF Ph1 Toms River	21	operating	2021		PV						EDF Renewables; PVOne		39.984	-74.238	exact	Tom's River	Ocean County		New Jersey	https://gem.wiki/Toms_River_solar_farm	L804511	G805191	FR0010242511	0.5	21	21	3	2061	2101	2141	0	10.5	10.5	10.5	10.5	10.5	10.5	10.5	10.5	10.5	10.5	10.5
solar	French Guiana	Americas	Latin America and the Caribbean	Toucan solar farm	1	Parque Solar Toucan		5	operating	2014		PV						EDF Renewables		4.8685	-52.5011	approximate	Montsinéry-Tonnégrande				https://gem.wiki/Toucan_solar_farm	L808289	G810460	FR0010242511	1	10		10	2054	2094	2134	5	5	5	5	5	5	5	5	5	5	5	5
solar	French Guiana	Americas	Latin America and the Caribbean	Toucan solar farm	2	Parque Solar Toucan		5	announced			PV						EDF Renewables		4.8685	-52.5011	approximate	Montsinéry-Tonnegrande			French Guiana	https://gem.wiki/Toucan_solar_farm	L808289	G838031	FR0010242511	1	10	10	-99	40	80	120	0	0	0	0	0	0	0	0	0	0	0	0
solar	France	Europe	Western Europe	Toul-Rosières Solar Park	3			36	operating	2012		PV						EDF Energie Nouvelles		48.783	5.9826	exact		Meurthe-et-Moselle		Grand Est	https://gem.wiki/Toul-Rosières_Solar_Park	L805759	G806627	FR0010242511	1	36	36	12	2052	2092	2132	36	36	36	36	36	36	36	36	36	36	36	36
solar	United States	Americas	Northern America	Tracy solar farm			Lafargeville Solar, Tracy Solar Energy Center	119	pre-construction	2025		PV						EDF Renewables		44.1608	-75.9904	exact		Jefferson County	Orleans	New York	https://gem.wiki/Tracy_solar_farm	L805035	G805804	FR0010242511	1	119	119	-1	2065	2105	2145	0	0	0	0	0	0	0	0	0	0	0	0
solar	United Kingdom	Europe	Northern Europe	Tye Lane Solar			Tye Lane - Solar Farm	50	pre-construction			PV						EDF Renewables		52.0838	1.0771	approximate	Bramford	Suffolk	Eastern	England	https://gem.wiki/Tye_Lane_Solar	L806222	G807153	FR0010242511	1	50	50	-99	40	80	120	0	0	0	0	0	0	0	0	0	0	0	0
solar	South Africa	Africa	Sub-Saharan Africa	Umoyilanga Energy Project solar farm				138	pre-construction			PV						EDF Renewables		-28.4414	21.168	exact	Upington	ZF Mgcawu District Municipality		Northern Cape	https://gem.wiki/Umoyilanga_Energy_Project_solar_farm	L811673	G814231	FR0010242511	1	138	138	-99	40	80	120	0	0	0	0	0	0	0	0	0	0	0	0
solar	United States	Americas	Northern America	Valentine Solar				111	operating	2019		PV						EDF Renewables		34.9042	-118.384	exact		Kern County		California	https://gem.wiki/Valentine_Solar	L804436	G805099	FR0010242511	1	111	111	5	2059	2099	2139	111	111	111	111	111	111	111	111	111	111	111	111
solar	Canada	Americas	Northern America	Vulcan Solar	1			55	pre-construction	2025		PV						EDF Renewables		50.0992	-112.848	exact		Lethbridge County		Alberta	https://gem.wiki/Vulcan_Solar	L804423	G805078	FR0010242511	1	78		-1	2065	2105	2145	0	0	0	0	0	0	0	0	0	0	0	0
solar	Canada	Americas	Northern America	Vulcan Solar	2			23	pre-construction	2025		PV						EDF Renewables		50.0992	-112.848	exact		Lethbridge County		Alberta	https://gem.wiki/Vulcan_Solar	L804423	G805079	FR0010242511	1	78	78	-1	2065	2105	2145	0	0	0	0	0	0	0	0	0	0	0	0
solar	United States	Americas	Northern America	Wayland Solar				120	announced	2026		PV						EDF Renewables		42.5644	-77.6261	approximate		Steuben County		New York	https://gem.wiki/Wayland_Solar	L808550	G810794	FR0010242511	1	120	120	-2	2066	2106	2146	0	0	0	0	0	0	0	0	0	0	0	0
solar	Chile	Americas	Latin America and the Caribbean	Wayra solar farm	1	Parque Solar Wayra		33	pre-construction	2024		PV						EDF Renewables Chile		-25.4067	-70.4798	approximate		Provincia de Antofagasta		Antofagasta Region	https://gem.wiki/Wayra_solar_farm	L808011	G810113	FR0010242511	1	99		0	2064	2104	2144	0	0	0	0	0	0	0	0	0	0	0	0
solar	Chile	Americas	Latin America and the Caribbean	Wayra solar farm	2	Parque Solar Wayra		33	pre-construction	2024		PV						EDF Renewables Chile		-25.4067	-70.4798	approximate		Provincia de Antofagasta		Antofagasta Region	https://gem.wiki/Wayra_solar_farm	L808011	G810114	FR0010242511	1	99		0	2064	2104	2144	0	0	0	0	0	0	0	0	0	0	0	0
solar	Chile	Americas	Latin America and the Caribbean	Wayra solar farm	3	Parque Solar Wayra		33	pre-construction	2024		PV						EDF Renewables Chile		-25.4067	-70.4798	approximate		Provincia de Antofagasta		Antofagasta Region	https://gem.wiki/Wayra_solar_farm	L808011	G810115	FR0010242511	1	99	99	0	2064	2104	2144	0	0	0	0	0	0	0	0	0	0	0	0
solar	United States	Americas	Northern America	Wild Hill Solar			Blake Solar Plant	96	pre-construction	2025		PV						EDF Renewables		39.2955	-77.8783	approximate		Jefferson County		West Virginia	https://gem.wiki/Wild_Hill_Solar	L804437	G805100	FR0010242511	1	96	96	-1	2065	2105	2145	0	0	0	0	0	0	0	0	0	0	0	0
solar	Israel	Asia	Western Asia	Zmorot solar farm				50	operating	2016		PV						EDF Renewables		31.2468	34.7099	exact	Beer Sheva		Beersheba Subdistrict	South District	https://gem.wiki/Zmorot_solar_farm	L804057	G804634	FR0010242511	1	50	50	8	2056	2096	2136	50	50	50	50	50	50	50	50	50	50	50	50
wind	Greece	Europe	Southern Europe	Aetos Kakoraiika wind farm		Αετος - Κακοραιικα	Aetos, Fokida 2	23	operating	2010		onshore						EDF Renewables Greece		38.4323	22.2732	exact	Municipal Unit of Galaxidi	Regional Unit of Phocis	Central Greece	Thessaly and Central Greece	https://gem.wiki/Aetos_Kakoraiika_wind_farm	L912188	G915268	FR0010242511	1	23	23	14	2050	2090	2130	23	23	23	23	23	23	23	23	23	23	23	23
wind	France	Europe	Western Europe	Allanche wind farm	1			12	operating	2012		onshore						EDF Renewables		45.2312	2.9535	exact		Cantal		Auvergne-Rhône-Alpes	https://gem.wiki/Allanche_wind_farm	L912329	G915428	FR0010242511	1	24		12	2052	2092	2132	12	12	12	12	12	12	12	12	12	12	12	12
wind	France	Europe	Western Europe	Allanche wind farm	2			12	operating	2012		onshore						EDF Renewables		45.2312	2.9535	exact		Cantal		Auvergne-Rhône-Alpes	https://gem.wiki/Allanche_wind_farm	L912329	G923986	FR0010242511	1	24	24	12	2052	2092	2132	12	12	12	12	12	12	12	12	12	12	12	12
wind	Greece	Europe	Southern Europe	Alogomandria Mavrovouni wind farm	1	Αλογομανδρια -Μαυροβουνι	Alogomandria	11	operating	2009		onshore						EDF Renewables Greece; PPC Renewables SA (PPCR) [44.6%]		38.544	23.1331	exact		Regional Unit of Boeotia	Central Greece	Thessaly and Central Greece	https://gem.wiki/Alogomandria_Mavrovouni_wind_farm	L908352	G911049	FR0010242511	0.554	11	11	15	2049	2089	2129	6.094	6.094	6.094	6.094	6.094	6.094	6.094	6.094	6.094	6.094	6.094	6.094
wind	India	Asia	Southern Asia	Amreli (Sitac) wind farm				26	operating			onshore						Sitac RE [50%]; EDF Renewables [50%]		20.8667	70.7501	approximate			Amreli	Gujarat	https://gem.wiki/Amreli_(Sitac)_wind_farm	L900615	G900709	FR0010242511	0.5	26	26	-99	40	80	120	13	13	13	13	13	13	13	13	13	13	13	13
wind	Italy	Europe	Southern Europe	Andretta Et Bisaccia wind farm				70	operating	2007		onshore						EDF Renewables		40.4004	15.33	exact		Salerno		Campania	https://gem.wiki/Andretta_Et_Bisaccia_wind_farm	L915411	G919062	FR0010242511	1	70	70	17	2047	2087	2127	70	70	70	70	70	70	70	70	70	70	70	70
wind	Portugal	Europe	Southern Europe	Arga wind farm	1		Serra d'Arga wind farm, Parque Eólico Arga	36	operating	2008		onshore						EDF Renewables		41.8246	-8.7108	exact		Viana do Castelo			https://gem.wiki/Arga_wind_farm	L913843	G917195	FR0010242511	1	36	36	16	2048	2088	2128	36	36	36	36	36	36	36	36	36	36	36	36
wind	United States	Americas	Northern America	Atlantic Shores Offshore Wind Bight	1		OCS-A 0541, Central Bight Wind Energy Area	1284	announced			offshore hard mount						EDF Renewables; Shell Group INC		39.1941	-73.3129	approximate	New York			New York	https://gem.wiki/Atlantic_Shores_Offshore_Wind_Bight	L907694	G910355	FR0010242511	0.5	1284	1284	-99	40	80	120	0	0	0	0	0	0	0	0	0	0	0	0
wind	United States	Americas	Northern America	Atlantic Shores Offshore Wind North	1		OCS-A 0549	1182	announced			offshore hard mount						EDF Renewables; Shell Group INC		39.2785	-74.1364	approximate					https://gem.wiki/Atlantic_Shores_Offshore_Wind_North	L921920	G927232	FR0010242511	0.5	1182	1182	-99	40	80	120	0	0	0	0	0	0	0	0	0	0	0	0
wind	United States	Americas	Northern America	Atlantic Shores South Wind Project	1		OCS-A 0499	1510	pre-construction	2027		offshore hard mount						Shell Group INC; EDF Renewables		39.0954	-74.4387	approximate	Atlantic City			New Jersey	https://gem.wiki/Atlantic_Shores_South_Wind_Project	L907699	G910364	FR0010242511	0.5	2837		-3	2067	2107	2147	0	0	0	0	0	0	0	0	0	0	0	0
wind	United States	Americas	Northern America	Atlantic Shores South Wind Project	2		OCS-A 0499	1327	pre-construction			offshore hard mount						Shell Group INC; EDF Renewables		39.0954	-74.4387	approximate				New Jersey	https://gem.wiki/Atlantic_Shores_South_Wind_Project	L907699	G927233	FR0010242511	0.5	2837	2837	-99	40	80	120	0	0	0	0	0	0	0	0	0	0	0	0
wind	Brazil	Americas	Latin America and the Caribbean	Baixa Do Feijão wind farm	1	Parque Eólico Baixa do Feijão		30	operating	2016		onshore						EDF Renewables		-5.3698	-36.0317	exact	Jandaíra		Região Geográfica Intermediária de Natal	Rio Grande do Norte	https://gem.wiki/Baixa_Do_Feijão_wind_farm	L905155	G906688	FR0010242511	1	120		8	2056	2096	2136	30	30	30	30	30	30	30	30	30	30	30	30
wind	Brazil	Americas	Latin America and the Caribbean	Baixa Do Feijão wind farm	2	Parque Eólico Baixa do Feijão		30	operating	2016		onshore						EDF Renewables		-5.3022	-36.0381	exact	Jandaíra		Região Geográfica Intermediária de Natal	Rio Grande do Norte	https://gem.wiki/Baixa_Do_Feijão_wind_farm	L905155	G906689	FR0010242511	1	120		8	2056	2096	2136	30	30	30	30	30	30	30	30	30	30	30	30
wind	Brazil	Americas	Latin America and the Caribbean	Baixa Do Feijão wind farm	3	Parque Eólico Baixa do Feijão		30	operating	2016		onshore						EDF Renewables		-5.3449	-36.0401	exact	Jandaíra		Região Geográfica Intermediária de Natal	Rio Grande do Norte	https://gem.wiki/Baixa_Do_Feijão_wind_farm	L905155	G906690	FR0010242511	1	120		8	2056	2096	2136	30	30	30	30	30	30	30	30	30	30	30	30
wind	Brazil	Americas	Latin America and the Caribbean	Baixa Do Feijão wind farm	4	Parque Eólico Baixa do Feijão		30	operating	2016		onshore						EDF Renewables		-5.322	-36.0606	exact	Jandaíra		Região Geográfica Intermediária de Natal	Rio Grande do Norte	https://gem.wiki/Baixa_Do_Feijão_wind_farm	L905155	G906691	FR0010242511	1	120	120	8	2056	2096	2136	30	30	30	30	30	30	30	30	30	30	30	30
wind	Australia	Oceania	Australia and New Zealand	Banana Range wind farm	1			230	pre-construction	2026		onshore						EDF Renewables		-24.4368	150.329	approximate	Biloela			Queensland	https://gem.wiki/Banana_Range_wind_farm	L906077	G927813	FR0010242511	1	452		-2	2066	2106	2146	0	0	0	0	0	0	0	0	0	0	0	0
wind	Australia	Oceania	Australia and New Zealand	Banana Range wind farm	2			222	pre-construction			onshore						EDF Renewables		-24.4609	150.366	approximate				Queensland	https://gem.wiki/Banana_Range_wind_farm	L906077	G927814	FR0010242511	1	452	452	-99	40	80	120	0	0	0	0	0	0	0	0	0	0	0	0
wind	Italy	Europe	Southern Europe	Barletta wind farm				10	operating	2008		onshore						EDF Renewables Italia		41.3215	16.2869	approximate	Barletta			Apulia	https://gem.wiki/Barletta_wind_farm	L907726	G910393	FR0010242511	1	10	10	16	2048	2088	2128	10	10	10	10	10	10	10	10	10	10	10	10
wind	United Kingdom	Europe	Northern Europe	Barmoor South wind farm				14	operating	2015		onshore						EDF Renewables		55.6373	-2.0251	exact		Northumberland	North East England	England	https://gem.wiki/Barmoor_South_wind_farm	L909716	G912497	FR0010242511	1	14	14	9	2055	2095	2135	14	14	14	14	14	14	14	14	14	14	14	14
wind	United Kingdom	Europe	Northern Europe	Barmoor wind farm				12	operating	2014		onshore						EDF Renewables		55.6356	-2.0333	exact		Northumberland	North East England	England	https://gem.wiki/Barmoor_wind_farm	L912882	G916057	FR0010242511	1	12	12	10	2054	2094	2134	12	12	12	12	12	12	12	12	12	12	12	12
wind	France	Europe	Western Europe	Basse Thiérarche wind farm	Sud			24	operating	2014		onshore						EDF Renewables; Diamond Generating Europe LTD		49.9509	3.6645	exact	Iron	Aisne		Hauts-de-France	https://gem.wiki/Basse_Thiérarche_wind_farm	L912337	G915436	FR0010242511	0.5	24	24	10	2054	2094	2134	12	12	12	12	12	12	12	12	12	12	12	12
wind	France	Europe	Western Europe	Beaujolais Vert wind farm				12	operating	2022		onshore						EDF Renewables		45.9476	4.3895	exact		Rhône	Departemental constituency of Rhône	Auvergne-Rhône-Alpes	https://gem.wiki/Beaujolais_Vert_wind_farm	L908750	G911469	FR0010242511	1	12	12	2	2062	2102	2142	0	0	12	12	12	12	12	12	12	12	12	12
wind	United Kingdom	Europe	Northern Europe	Beck Burn wind farm				31	operating	2017		onshore						EDF Renewables		55.0107	-3.0263	exact	Carlisle	Cumbria County	North West England	England	https://gem.wiki/Beck_Burn_wind_farm	L910988	G916695	FR0010242511	1	31	31	7	2057	2097	2137	31	31	31	31	31	31	31	31	31	31	31	31
wind	Belgium	Europe	Western Europe	Berloz wind farm				16	operating	2015		onshore						EDF Luminus		50.6869	5.2014	exact		Waremme		Liège	https://gem.wiki/Berloz_wind_farm	L910492	G913356	FR0010242511	1	16	16	9	2055	2095	2135	16	16	16	16	16	16	16	16	16	16	16	16
wind	Belgium	Europe	Western Europe	Bièvre wind farm			Pont Mack wind farm	14	operating	2014		onshore						EDF Luminus		49.9532	5.0207	exact		Dinant		Namur	https://gem.wiki/Bièvre_wind_farm	L909816	G912602	FR0010242511	1	14	14	10	2054	2094	2134	14	14	14	14	14	14	14	14	14	14	14	14
wind	Mexico	Americas	Latin America and the Caribbean	Bii Stinu wind farm		Parque Eólico Bii Stinu	Bii Stinú	164	operating	2013		onshore						EDF Renewables		16.4566	-94.9657	approximate	La Ventosa			Oaxaca	https://gem.wiki/Bii_Stinu_wind_farm	L905150	G906679	FR0010242511	1	164	164	11	2053	2093	2133	164	164	164	164	164	164	164	164	164	164	164	164
wind	Canada	Americas	Northern America	Blackspring Ridge wind farm				299	operating	2014		onshore						Enbridge INC [50%]; EDF Renewables [50%]		50.2064	-112.914	exact		Vulcan County		Alberta	https://gem.wiki/Blackspring_Ridge_wind_farm	L907556	G910190	FR0010242511	0.5	299	299	10	2054	2094	2134	149.5	149.5	149.5	149.5	149.5	149.5	149.5	149.5	149.5	149.5	149.5	149.5
wind	United Kingdom	Europe	Northern Europe	Blyth Offshore wind farm	1		Blyth Offshore Wind Test Site, Blyth Offshore Demonstrator Limited (BODL), Blyth Demonstration Phase I	42	operating	2017		offshore hard mount						EDF Renewables		55.167	-1.3644	exact					https://gem.wiki/Blyth_Offshore_wind_farm	L914316	G917745	FR0010242511	1	100		7	2057	2097	2137	42	42	42	42	42	42	42	42	42	42	42	42
wind	United Kingdom	Europe	Northern Europe	Blyth Offshore wind farm	2		Blyth Offshore Wind Farm Phase 2 Demonstrator Project, Blyth Offshore Demonstrator Limited (BODL), Blyth Demo Phases 2 & 3	58	pre-construction			offshore floating						EDF Renewables [51%]; Vantage RE LTD; Tenaga Nasional BHD (TNB)		55.167	-1.3644	exact	Ashington				https://gem.wiki/Blyth_Offshore_wind_farm	L914316	G918867	FR0010242511	0.51	100	100	-99	40	80	120	0	0	0	0	0	0	0	0	0	0	0	0
wind	United States	Americas	Northern America	Bobcat Bluff Wind Project	RP			162	operating	2019		onshore						EDF Renewables		33.5036	-98.5805	exact					https://gem.wiki/Bobcat_Bluff_Wind_Project	L907194	G927236	FR0010242511	1	162	162	5	2059	2099	2139	162	162	162	162	162	162	162	162	162	162	162	162
wind	France	Europe	Western Europe	Bois De Belfays wind farm				20	operating	2017		onshore						EDF Renewables		48.3543	7.0586	approximate	Châtas			Vosges	https://gem.wiki/Bois_De_Belfays_wind_farm	L911492	G914475	FR0010242511	1	20	20	7	2057	2097	2137	20	20	20	20	20	20	20	20	20	20	20	20
wind	France	Europe	Western Europe	Bois de Bouery wind farm				23.1	pre-construction			onshore						EDF Renewables		46.2869	1.2936	exact	Mailhac-sur-Benaize				https://gem.wiki/Bois_de_Bouery_wind_farm	L919525	G924030	FR0010242511	1	23.1	23.1	-99	40	80	120	0	0	0	0	0	0	0	0	0	0	0	0
wind	Italy	Europe	Southern Europe	Bonorva wind farm				74	operating	2011		onshore						EDF Renewables		40.3958	8.8073	exact		Sassari		Sardinia	https://gem.wiki/Bonorva_wind_farm	L915478	G919137	FR0010242511	1	74	74	13	2051	2091	2131	74	74	74	74	74	74	74	74	74	74	74	74
wind	France	Europe	Western Europe	Bouin wind farm			Côte de Jade	20	operating	2003		onshore						EDF Renewables		46.9523	-2.0537	exact		Vendée		Pays de la Loire	https://gem.wiki/Bouin_wind_farm	L911429	G914407	FR0010242511	1	20	20	21	2043	2083	2123	20	20	20	20	20	20	20	20	20	20	20	20
wind	France	Europe	Western Europe	Boulay Sud wind farm			Buchfeld wind farm	10	operating	2008		onshore						EDF Renewables		49.1714	6.5219	exact		Moselle		Grand Est	https://gem.wiki/Boulay_Sud_wind_farm	L907749	G910417	FR0010242511	1	10	10	16	2048	2088	2128	10	10	10	10	10	10	10	10	10	10	10	10
wind	United States	Americas	Northern America	Brickyard Hill Wind	1			157	announced	2024		onshore						EDF Renewables		40.3917	-95.3506	approximate				Missouri	https://gem.wiki/Brickyard_Hill_Wind	L921922	G927238	FR0010242511	1	157	157	0	2064	2104	2144	0	0	0	0	0	0	0	0	0	0	0	0
wind	France	Europe	Western Europe	Briffons wind farm				22.5	pre-construction			onshore						EDF Renewables		45.7059	2.6678	approximate	Briffons		Puy-de-Dome		https://gem.wiki/Briffons_wind_farm	L919546	G924051	FR0010242511	1	22.5	22.5	-99	40	80	120	0	0	0	0	0	0	0	0	0	0	0	0
wind	Canada	Americas	Northern America	Bull Trail wind farm				270	pre-construction	2024		onshore						EDF Renewables		49.8446	-110.28	exact		Cypress County		Alberta	https://gem.wiki/Bull_Trail_wind_farm	L916381	G920212	FR0010242511	1	270	270	0	2064	2104	2144	0	0	0	0	0	0	0	0	0	0	0	0
wind	Türkiye	Asia	Western Asia	Burgaz wind farm				14.9	operating	2007		onshore						EDF Renewables		40.3883	26.583	exact		Gelibolu		Çanakkale	https://gem.wiki/Burgaz_wind_farm	L921487	G926459	FR0010242511	1	14.9	14.9	17	2047	2087	2127	14.9	14.9	14.9	14.9	14.9	14.9	14.9	14.9	14.9	14.9	14.9	14.9
wind	United Kingdom	Europe	Northern Europe	Burnfoot Hill wind farm	1			26	operating	2010		onshore						EDF Renewables		56.2091	-3.7728	exact		Clackmannanshire		Scotland	https://gem.wiki/Burnfoot_Hill_wind_farm	L912759	G915911	FR0010242511	1	26	26	14	2050	2090	2130	26	26	26	26	26	26	26	26	26	26	26	26
wind	Chile	Americas	Latin America and the Caribbean	Cabo Leones wind farm	1	Parque Eólico Cabo Leones		116	operating	2017		onshore						Grupo Ibereólica Renovables; EDF Renewables		-28.9274	-71.4445	exact	Freirina	Provincia de Huasco	Huasco	Atacama Region	https://gem.wiki/Cabo_Leones_wind_farm	L904935	G907002	FR0010242511	0.5	321		7	2057	2097	2137	58	58	58	58	58	58	58	58	58	58	58	58
wind	Chile	Americas	Latin America and the Caribbean	Cabo Leones wind farm	2	Parque Eólico Cabo Leones		205	operating	2021		onshore						Grupo Ibereólica Renovables; EDF Renewables		-28.9768	-71.4452	exact	Freirina	Provincia de Huasco	Huasco	Atacama Region	https://gem.wiki/Cabo_Leones_wind_farm	L904935	G906058	FR0010242511	0.5	321	321	3	2061	2101	2141	0	102.5	102.5	102.5	102.5	102.5	102.5	102.5	102.5	102.5	102.5	102.5
wind	Italy	Europe	Southern Europe	Campidano (EDF) wind farm				70	operating	2008		onshore						EDF Renewables		39.5341	8.6002	approximate	Arbus		South Sardinia		https://gem.wiki/Campidano_(EDF)_wind_farm	L915415	G919066	FR0010242511	1	70	70	16	2048	2088	2128	70	70	70	70	70	70	70	70	70	70	70	70
wind	France	Europe	Western Europe	Canton De Bonneval wind farm				24	operating	2009		onshore						EDF Renewables		48.2222	1.5327	exact		Eure-et-Loir		Centre-Loire Valley	https://gem.wiki/Canton_De_Bonneval_wind_farm	L912354	G915454	FR0010242511	1	24	24	15	2049	2089	2129	24	24	24	24	24	24	24	24	24	24	24	24
wind	Italy	Europe	Southern Europe	Carluva wind farm				12	operating	2008		onshore						EDF Renewables Italia		40.0325	18.1837	approximate				Apulia	https://gem.wiki/Carluva_wind_farm	L908802	G911524	FR0010242511	1	12	12	16	2048	2088	2128	12	12	12	12	12	12	12	12	12	12	12	12
wind	France	Europe	Western Europe	Castanet wind farm				14	operating	2009		onshore						EDF Renewables		43.66	2.91	approximate	Castanet le Haut		Hérault		https://gem.wiki/Castanet_wind_farm	L909727	G912508	FR0010242511	1	14	14	15	2049	2089	2129	14	14	14	14	14	14	14	14	14	14	14	14
wind	France	Europe	Western Europe	Catalan wind farm				96	operating	2016		onshore						EDF Renewables		42.7171	2.7739	exact	Pézilla-la-Rivière	Pyrénées-Orientales		Occitania	https://gem.wiki/Catalan_wind_farm	L915656	G919355	FR0010242511	1	96	96	8	2056	2096	2136	96	96	96	96	96	96	96	96	96	96	96	96
wind	Brazil	Americas	Latin America and the Caribbean	Catanduba wind farm	1	Parque Eólico Catanduba		50	construction	2025		onshore						EDF Renewables		-5.3433	-36.1942	exact	Jandaíra		Região Geográfica Intermediária de Natal	Rio Grande do Norte	https://gem.wiki/Catanduba_wind_farm	L905156	G906692	FR0010242511	1	100		-1	2065	2105	2145	0	0	0	0	0	50	50	50	50	50	50	50
wind	Brazil	Americas	Latin America and the Caribbean	Catanduba wind farm	2	Parque Eólico Catanduba		50	construction	2025		onshore						EDF Renewables		-5.3785	-36.2072	exact	Jandaíra		Região Geográfica Intermediária de Natal	Rio Grande do Norte	https://gem.wiki/Catanduba_wind_farm	L905156	G906693	FR0010242511	1	100	100	-1	2065	2105	2145	0	0	0	0	0	50	50	50	50	50	50	50
wind	Portugal	Europe	Southern Europe	Centro - Candal/Coelheira wind farm	1		Parque Eólico Centro - Candal/Coelheira	40	operating	2006		onshore						EDF Renewables		40.825	-8.1401	exact	Carvalhais e Candal	Viseu			https://gem.wiki/Centro_-_Candal/Coelheira_wind_farm	L914198	G917602	FR0010242511	1	40	40	18	2046	2086	2126	40	40	40	40	40	40	40	40	40	40	40	40
wind	France	Europe	Western Europe	Champ Gorleau wind farm				23	announced			onshore						EDF Renewables		47.6606	3.9765	approximate	Massangis				https://gem.wiki/Champ_Gorleau_wind_farm	L919565	G924074	FR0010242511	1	23	23	-99	40	80	120	0	0	0	0	0	0	0	0	0	0	0	0
wind	France	Europe	Western Europe	Chemin D'Ablis wind farm				52	operating	2008		onshore						EDF Renewables		48.3322	1.8622	exact	Fresnay-l'Évêque	Eure-et-Loir		Centre-Loire Valley	https://gem.wiki/Chemin_D'Ablis_wind_farm	L915125	G918724	FR0010242511	1	52	52	16	2048	2088	2128	52	52	52	52	52	52	52	52	52	52	52	52
wind	United States	Americas	Northern America	Chestnut Flats wind farm	1			38	operating	2011		onshore						EDF Renewables		40.5203	-78.4854	exact	Logan Township	Blair County		Pennsylvania	https://gem.wiki/Chestnut_Flats_wind_farm	L906596	G908895	FR0010242511	1	38	38	13	2051	2091	2131	38	38	38	38	38	38	38	38	38	38	38	38
wind	Belgium	Europe	Western Europe	Ciney (EDF) wind farm			Sovet wind farm	20	operating	2011		onshore						EDF Luminus		50.2829	5.0551	exact		Dinant		Namur	https://gem.wiki/Ciney_(EDF)_wind_farm	L911745	G914763	FR0010242511	1	20	20	13	2051	2091	2131	20	20	20	20	20	20	20	20	20	20	20	20
wind	Italy	Europe	Southern Europe	Ciponte wind farm				10	operating	2008		onshore						EDF Renewables Italia		40.0325	18.1837	approximate				Apulia	https://gem.wiki/Ciponte_wind_farm	L907784	G910455	FR0010242511	1	10		16	2048	2088	2128	10	10	10	10	10	10	10	10	10	10	10	10
wind	France	Europe	Western Europe	Clamanges wind farm	1			10	operating	2008		onshore						EDF Renewables		48.8443	4.081	exact		Marne		Grand Est	https://gem.wiki/Clamanges_wind_farm	L907785	G910456	FR0010242511	1	10	10	16	2048	2088	2128	10	10	10	10	10	10	10	10	10	10	10	10
wind	France	Europe	Western Europe	Clanlieu wind farm				13	operating	2018		onshore						EDF Renewables		49.8399	3.6284	exact		Aisne		Hauts-de-France	https://gem.wiki/Clanlieu_wind_farm	L909669	G912446	FR0010242511	1	13	13	6	2058	2098	2138	13	13	13	13	13	13	13	13	13	13	13	13
wind	Ireland	Europe	Northern Europe	Codling wind farm				1500	pre-construction			offshore mount unknown						EDF Renewables [50%]; Fred Olsen Renewables AB [50%]		53.1001	-5.7801	approximate					https://gem.wiki/Codling_wind_farm	L916338	G920158	FR0010242511	0.5	1500	1500	-99	40	80	120	0	0	0	0	0	0	0	0	0	0	0	0
wind	United States	Americas	Northern America	Collins Wind Project	1			200	pre-construction	2028		onshore						EDF Renewables		42.4531	-78.7795	approximate					https://gem.wiki/Collins_Wind_Project	L921928	G927256	FR0010242511	1	200	200	-4	2068	2108	2148	0	0	0	0	0	0	0	0	0	0	0	0
wind	United States	Americas	Northern America	Copenhagen wind farm	1		Copenhagen Wind Farm	80	operating	2018	2043	onshore						EDF Renewables		43.8818	-75.6396	exact		Lewis County		New York	https://gem.wiki/Copenhagen_wind_farm	L906866	G909251	FR0010242511	1	80	80	6	2058	2098	2138	80	80	80	80	80	80	80	80	80	80	80	80
wind	France	Europe	Western Europe	Corbières Méditerrannée wind farm			Cambouisset	21	operating	2010		onshore						EDF Renewables		42.9952	2.9838	exact	Sigean	Aude		Occitania	https://gem.wiki/Corbières_Méditerrannée_wind_farm	L911767	G914788	FR0010242511	1	21	21	14	2050	2090	2130	21	21	21	21	21	21	21	21	21	21	21	21
[truncated: 316 more rows]
[truncated: 19 more columns]

## Sheet: EDF_TP
Type	Country/area	Region	Subregion	Plant / Project name	Unit / Phase name	Plant / Project name (local)	Plant / Project name (other)	Capacity (MW)	Status	Start year	Retired year	Technology	Fuel	Country/area 1 (hydropower only)	Country/area 2 (hydropower only)	Country/area 1 Capacity (MW) (hydropower only)	Country/area 2 Capacity (MW) (hydropower only)	Owner	Parent	Latitude	Longitude	Location accuracy	City	Local area (taluk, county)	Major area (prefecture, district)	Subnational unit (state, province)	GEM.Wiki URL	GEM location ID	GEM unit/phase ID	CompISIN	Ownership	Plant capacity	Plant capacity	Age	Reinvestment year	Reinvestment year	Reinvestment year	2020	2021	2022	2023	2024	2025	2026	2027	2028	2029	2030	2031
[truncated: 727 more rows]
[truncated: 19 more columns]

[truncated: 1 more sheets: EDF_fossilfuel]
