# Supplementary material for: Assessing corporate transition plans using a production asset-based planning approach
Source: Research Square preprint supplement (doi:10.21203/rs.3.rs-5245457/v1), 2024-12-09
Supplement: Supplementary file 9 [file 10 SouthernCo.xlsx]

## Sheet: SouthernCo_all
Type	Country/area	Region	Subregion	Plant / Project name	Unit / Phase name	Plant / Project name (local)	Plant / Project name (other)	Capacity (MW)	Status	Start year	Retired year	Technology	Fuel	Country/area 1 (hydropower only)	Country/area 2 (hydropower only)	Country/area 1 Capacity (MW) (hydropower only)	Country/area 2 Capacity (MW) (hydropower only)	Owner	Parent	Latitude	Longitude	Location accuracy	City	Local area (taluk, county)	Major area (prefecture, district)	Subnational unit (state, province)	GEM.Wiki URL	GEM location ID	GEM unit/phase ID	CompISIN	Ownership	Plant capacity	Plant capacity	Age	Reinvestment year	Reinvestment year	Reinvestment year
coal	United States	Americas	Northern America	Arkwright power station	Unit 1			46	retired	1941	2002	subcritical	unknown					Georgia Power [100%]	Southern Co [100.0%]	32.925	-83.71	exact	Macon			Georgia	https://www.gem.wiki/Arkwright_power_station	L100000104678	G100000114543	US8425871071	1	181.3		83	1981	2021	2061
coal	United States	Americas	Northern America	Arkwright power station	Unit 2			46	retired	1942	2002	subcritical	unknown					Georgia Power [100%]	Southern Co [100.0%]	32.925	-83.71	exact	Macon			Georgia	https://www.gem.wiki/Arkwright_power_station	L100000104678	G100000114544	US8425871071	1	181.3		82	1982	2022	2062
coal	United States	Americas	Northern America	Arkwright power station	Unit 3			40.3	retired	1943	2002	subcritical	unknown					Georgia Power [100%]	Southern Co [100.0%]	32.925	-83.71	exact	Macon			Georgia	https://www.gem.wiki/Arkwright_power_station	L100000104678	G100000114545	US8425871071	1	181.3		81	1983	2023	2063
coal	United States	Americas	Northern America	Arkwright power station	Unit 4			49	retired	1948	2002	subcritical	unknown					Georgia Power [100%]	Southern Co [100.0%]	32.925	-83.71	exact	Macon			Georgia	https://www.gem.wiki/Arkwright_power_station	L100000104678	G100000114546	US8425871071	1	181.3	181.3	76	1988	2028	2068
coal	United States	Americas	Northern America	Barry Steam Plant	Unit 1			153.1	retired	1954	2016	subcritical	bituminous					Alabama Power [100%]	Southern Co [100.0%]	31.0066	-88.0088	exact	Bucks	Mobile		Alabama	https://www.gem.wiki/Barry_Steam_Plant	L100000103776	G100000100644	US8425871071	1	4270.7		70	1994	2034	2074
coal	United States	Americas	Northern America	Barry Steam Plant	Unit 2			153.1	retired	1954	2016	subcritical	bituminous					Alabama Power [100%]	Southern Co [100.0%]	31.0066	-88.0088	exact	Bucks	Mobile		Alabama	https://www.gem.wiki/Barry_Steam_Plant	L100000103776	G100000100645	US8425871071	1	4270.7		70	1994	2034	2074
coal	United States	Americas	Northern America	Barry Steam Plant	Unit 3			272	retired	1959	2016	subcritical	bituminous					Alabama Power [100%]	Southern Co [100.0%]	31.0066	-88.0088	exact	Bucks	Mobile		Alabama	https://www.gem.wiki/Barry_Steam_Plant	L100000103776	G100000100646	US8425871071	1	4270.7		65	1999	2039	2079
coal	United States	Americas	Northern America	Barry Steam Plant	Unit 4			403.7	operating	1969	2028	subcritical	bituminous					Alabama Power [100%]	Southern Co [100.0%]	31.0066	-88.0088	exact	Bucks	Mobile		Alabama	https://www.gem.wiki/Barry_Steam_Plant	L100000103776	G100000100647	US8425871071	1	4270.7		55	2009	2049	2089
coal	United States	Americas	Northern America	Barry Steam Plant	Unit 5			788.8	operating	1971	2028	supercritical	bituminous					Alabama Power [100%]	Southern Co [100.0%]	31.0066	-88.0088	exact	Bucks	Mobile		Alabama	https://www.gem.wiki/Barry_Steam_Plant	L100000103776	G100000100648	US8425871071	1	4270.7	4270.7	53	2011	2051	2091
coal	United States	Americas	Northern America	Daniel Generating Plant	Unit 1		Victor J. Daniel Generating Plant	500	operating	1977	2024	subcritical	bituminous					Florida Power & Light [50%]; Mississippi Power [50%]	NextEra Energy Inc [50.0%]; Southern Co [50.0%]	30.5327	-88.5571	exact	Escatawpa	Jackson		Mississippi	https://www.gem.wiki/Daniel_Generating_Plant	L100000104008	G100000101965	US8425871071	0.5	1000		47	2017	2057	2097
coal	United States	Americas	Northern America	Daniel Generating Plant	Unit 2		Victor J. Daniel Generating Plant	500	operating	1981	2027	subcritical	bituminous					Florida Power & Light [50%]; Mississippi Power [50%]	NextEra Energy Inc [50.0%]; Southern Co [50.0%]	30.5327	-88.5571	exact	Escatawpa	Jackson		Mississippi	https://www.gem.wiki/Daniel_Generating_Plant	L100000104008	G100000101966	US8425871071	0.5	1000	1000	43	2021	2061	2101
coal	United States	Americas	Northern America	Gadsden Steam Plant	Unit 1			69	retired	1949	2016	unknown	unknown					Alabama Power [100%]	Southern Co [100.0%]	34.0094	-85.968	exact	Gadsden			Alabama	https://www.gem.wiki/Gadsden_Steam_Plant	L100000103779	G100000102897	US8425871071	1	276		75	1989	2029	2069
coal	United States	Americas	Northern America	Gadsden Steam Plant	Unit 2			69	retired	1949	2016	unknown	unknown					Alabama Power [100%]	Southern Co [100.0%]	34.0094	-85.968	exact	Gadsden			Alabama	https://www.gem.wiki/Gadsden_Steam_Plant	L100000103779	G100000102898	US8425871071	1	276	276	75	1989	2029	2069
coal	United States	Americas	Northern America	Gaston Steam Plant	Unit 1		EC Gaston power station	272	retired	1960	2016	subcritical	bituminous					Georgia Power [50%]; Alabama Power [50%]	Southern Co [100.0%]	33.2432	-86.4589	exact	Wilsonville	Shelby		Alabama	https://www.gem.wiki/Gaston_Steam_Plant	L100000103780	G100000102955	US8425871071	1	4025.8		64	2000	2040	2080
coal	United States	Americas	Northern America	Gaston Steam Plant	Unit 2		EC Gaston power station	272	retired	1960	2016	subcritical	bituminous					Georgia Power [50%]; Alabama Power [50%]	Southern Co [100.0%]	33.2432	-86.4589	exact	Wilsonville	Shelby		Alabama	https://www.gem.wiki/Gaston_Steam_Plant	L100000103780	G100000102956	US8425871071	1	4025.8		64	2000	2040	2080
coal	United States	Americas	Northern America	Gaston Steam Plant	Unit 3		EC Gaston power station	272	retired	1961	2016	subcritical	bituminous					Georgia Power [50%]; Alabama Power [50%]	Southern Co [100.0%]	33.2432	-86.4589	exact	Wilsonville	Shelby		Alabama	https://www.gem.wiki/Gaston_Steam_Plant	L100000103780	G100000102957	US8425871071	1	4025.8		63	2001	2041	2081
coal	United States	Americas	Northern America	Gaston Steam Plant	Unit 4		EC Gaston power station	244.8	retired	1962	2016	subcritical	bituminous					Georgia Power [50%]; Alabama Power [50%]	Southern Co [100.0%]	33.2432	-86.4589	exact	Wilsonville	Shelby		Alabama	https://www.gem.wiki/Gaston_Steam_Plant	L100000103780	G100000102958	US8425871071	1	4025.8		62	2002	2042	2082
coal	United States	Americas	Northern America	Gaston Steam Plant	Unit 5		EC Gaston power station	952	operating	1974	2028	supercritical	bituminous					Alabama Power [100%]	Southern Co [100.0%]	33.2432	-86.4589	exact	Wilsonville	Shelby		Alabama	https://www.gem.wiki/Gaston_Steam_Plant	L100000103780	G100000102959	US8425871071	1	4025.8	4025.8	50	2014	2054	2094
coal	United States	Americas	Northern America	Gorgas Steam Plant	Unit 6		Gorgas Two power station	125	retired	1951	2015	subcritical	bituminous					Alabama Power [100%]	Southern Co [100.0%]	33.6455	-87.2003	exact	Parrish	Walker		Alabama	https://www.gem.wiki/Gorgas_Steam_Plant	L100000103781	G100000103097	US8425871071	1	1416.7		73	1991	2031	2071
coal	United States	Americas	Northern America	Gorgas Steam Plant	Unit 7		Gorgas Two power station	125	retired	1952	2015	subcritical	bituminous					Alabama Power [100%]	Southern Co [100.0%]	33.6455	-87.2003	exact	Parrish	Walker		Alabama	https://www.gem.wiki/Gorgas_Steam_Plant	L100000103781	G100000103098	US8425871071	1	1416.7		72	1992	2032	2072
coal	United States	Americas	Northern America	Gorgas Steam Plant	Unit 8		Gorgas Two power station	187.5	retired	1956	2019	subcritical	bituminous					Alabama Power [100%]	Southern Co [100.0%]	33.6455	-87.2003	exact	Parrish	Walker		Alabama	https://www.gem.wiki/Gorgas_Steam_Plant	L100000103781	G100000103099	US8425871071	1	1416.7		68	1996	2036	2076
coal	United States	Americas	Northern America	Gorgas Steam Plant	Unit 9		Gorgas Two power station	190.4	retired	1958	2019	subcritical	bituminous					Alabama Power [100%]	Southern Co [100.0%]	33.6455	-87.2003	exact	Parrish	Walker		Alabama	https://www.gem.wiki/Gorgas_Steam_Plant	L100000103781	G100000103100	US8425871071	1	1416.7		66	1998	2038	2078
coal	United States	Americas	Northern America	Gorgas Steam Plant	Unit 10		Gorgas Two power station	788.8	retired	1972	2019	supercritical	bituminous					Alabama Power [100%]	Southern Co [100.0%]	33.6455	-87.2003	exact	Parrish	Walker		Alabama	https://www.gem.wiki/Gorgas_Steam_Plant	L100000103781	G100000103096	US8425871071	1	1416.7	1416.7	52	2012	2052	2092
coal	United States	Americas	Northern America	Greene County Steam Plant	Unit 1		RD Green	299.2	retired	1965	2016	subcritical	bituminous					Alabama Power [60%]; Mississippi Power [40%]	Southern Co [100.0%]	32.6013	-87.7816	exact	Demopolis	Greene		Alabama	https://www.gem.wiki/Greene_County_Steam_Plant	L100000103782	G100000103129	US8425871071	1	1856.4		59	2005	2045	2085
coal	United States	Americas	Northern America	Greene County Steam Plant	Unit 2		RD Green	269.2	retired	1966	2016	subcritical	bituminous					Alabama Power [60%]; Mississippi Power [40%]	Southern Co [100.0%]	32.6013	-87.7816	exact	Demopolis	Greene		Alabama	https://www.gem.wiki/Greene_County_Steam_Plant	L100000103782	G100000103130	US8425871071	1	1856.4	1856.4	58	2006	2046	2086
coal	United States	Americas	Northern America	Hammond Steam Generating Station	Unit 1			125	retired	1954	2019	subcritical	bituminous					Georgia Power [100%]	Southern Co [100.0%]	34.2531	-85.3452	exact	Coosa	Floyd		Georgia	https://www.gem.wiki/Hammond_Steam_Generating_Station	L100000103837	G100000103591	US8425871071	1	953		70	1994	2034	2074
coal	United States	Americas	Northern America	Hammond Steam Generating Station	Unit 2			125	retired	1954	2019	subcritical	bituminous					Georgia Power [100%]	Southern Co [100.0%]	34.2531	-85.3452	exact	Coosa	Floyd		Georgia	https://www.gem.wiki/Hammond_Steam_Generating_Station	L100000103837	G100000103592	US8425871071	1	953		70	1994	2034	2074
coal	United States	Americas	Northern America	Hammond Steam Generating Station	Unit 3			125	retired	1955	2019	subcritical	bituminous					Georgia Power [100%]	Southern Co [100.0%]	34.2531	-85.3452	exact	Coosa	Floyd		Georgia	https://www.gem.wiki/Hammond_Steam_Generating_Station	L100000103837	G100000103593	US8425871071	1	953		69	1995	2035	2075
coal	United States	Americas	Northern America	Hammond Steam Generating Station	Unit 4			578	retired	1970	2019	subcritical	bituminous					Georgia Power [100%]	Southern Co [100.0%]	34.2531	-85.3452	exact	Coosa	Floyd		Georgia	https://www.gem.wiki/Hammond_Steam_Generating_Station	L100000103837	G100000103594	US8425871071	1	953	953	54	2010	2050	2090
coal	United States	Americas	Northern America	Harllee Branch Generating Plant	Unit 1			299.2	retired	1965	2015	subcritical	bituminous					Georgia Power [100%]	Southern Co [100.0%]	33.1945	-83.2996	exact	Milledgeville	Putnam		Georgia	https://www.gem.wiki/Harllee_Branch_Generating_Plant	L100000103838	G100000103658	US8425871071	1	1746.2		59	2005	2045	2085
coal	United States	Americas	Northern America	Harllee Branch Generating Plant	Unit 2			359	retired	1967	2013	subcritical	bituminous					Georgia Power [100%]	Southern Co [100.0%]	33.1945	-83.2996	exact	Milledgeville	Putnam		Georgia	https://www.gem.wiki/Harllee_Branch_Generating_Plant	L100000103838	G100000103659	US8425871071	1	1746.2		57	2007	2047	2087
coal	United States	Americas	Northern America	Harllee Branch Generating Plant	Unit 3			544	retired	1968	2015	supercritical	bituminous					Georgia Power [100%]	Southern Co [100.0%]	33.1945	-83.2996	exact	Milledgeville	Putnam		Georgia	https://www.gem.wiki/Harllee_Branch_Generating_Plant	L100000103838	G100000103660	US8425871071	1	1746.2		56	2008	2048	2088
coal	United States	Americas	Northern America	Harllee Branch Generating Plant	Unit 4			544	retired	1969	2015	supercritical	bituminous					Georgia Power [100%]	Southern Co [100.0%]	33.1945	-83.2996	exact	Milledgeville	Putnam		Georgia	https://www.gem.wiki/Harllee_Branch_Generating_Plant	L100000103838	G100000103661	US8425871071	1	1746.2	1746.2	55	2009	2049	2089
coal	United States	Americas	Northern America	Jack Watson Generating Plant	Unit 4			299.2	retired	1968	2015	subcritical	bituminous					Mississippi Power [100%]	Southern Co [100.0%]	30.4392	-89.0261	exact	Gulfport	Harrison		Mississippi	https://www.gem.wiki/Jack_Watson_Generating_Plant	L100000104009	G100000104938	US8425871071	1	1754.2		56	2008	2048	2088
coal	United States	Americas	Northern America	Jack Watson Generating Plant	Unit 5			578	retired	1973	2015	subcritical	bituminous					Mississippi Power [100%]	Southern Co [100.0%]	30.4392	-89.0261	exact	Gulfport	Harrison		Mississippi	https://www.gem.wiki/Jack_Watson_Generating_Plant	L100000104009	G100000104939	US8425871071	1	1754.2	1754.2	51	2013	2053	2093
coal	United States	Americas	Northern America	Kemper Project	--			582	cancelled			IGCC	unknown					Mississippi Power [100%]	Southern Co [100.0%]	32.6512	-88.759	exact	Kemper County			Mississippi	https://www.gem.wiki/Kemper_Project	L100000104010	G100000105662	US8425871071	1	582	582	-99	40	80	120
coal	United States	Americas	Northern America	Kraft Plant	Unit 1			50	retired	1958	2015	subcritical	bituminous					Georgia Power [100%]	Southern Co [100.0%]	32.1494	-81.1449	exact	Port Wentworth	Chatham		Georgia	https://www.gem.wiki/Kraft_Plant	L100000103840	G100000105930	US8425871071	1	207.9		66	1998	2038	2078
coal	United States	Americas	Northern America	Kraft Plant	Unit 2			54.4	retired	1961	2015	subcritical	bituminous					Georgia Power [100%]	Southern Co [100.0%]	32.1494	-81.1449	exact	Port Wentworth	Chatham		Georgia	https://www.gem.wiki/Kraft_Plant	L100000103840	G100000105931	US8425871071	1	207.9		63	2001	2041	2081
coal	United States	Americas	Northern America	Kraft Plant	Unit 3			103.5	retired	1965	2015	subcritical	bituminous					Georgia Power [100%]	Southern Co [100.0%]	32.1494	-81.1449	exact	Port Wentworth	Chatham		Georgia	https://www.gem.wiki/Kraft_Plant	L100000103840	G100000105932	US8425871071	1	207.9	207.9	59	2005	2045	2085
coal	United States	Americas	Northern America	McDonough Steam Generating Plant	Unit 1		Atkinson power station, Jack McDonough Steam Generating Plant	299.2	retired	1963	2012	subcritical	bituminous					Georgia Power [100%]	Southern Co [100.0%]	33.8247	-84.4748	exact	Smyrna	Cobb		Georgia	https://www.gem.wiki/McDonough_Steam_Generating_Plant	L100000103842	G100000106767	US8425871071	1	3364.4		61	2003	2043	2083
coal	United States	Americas	Northern America	McDonough Steam Generating Plant	Unit 2		Atkinson power station, Jack McDonough Steam Generating Plant	299.2	retired	1964	2011	subcritical	bituminous					Georgia Power [100%]	Southern Co [100.0%]	33.8247	-84.4748	exact	Smyrna	Cobb		Georgia	https://www.gem.wiki/McDonough_Steam_Generating_Plant	L100000103842	G100000106768	US8425871071	1	3364.4	3364.4	60	2004	2044	2084
coal	United States	Americas	Northern America	McIntosh Steam Plant	Unit 1		Effingham Steam Plant	177.6	retired	1979	2019	subcritical	bituminous					Georgia Power [100%]	Southern Co [100.0%]	32.3567	-81.1677	exact	Rincon	Effingham		Georgia	https://www.gem.wiki/McIntosh_Steam_Plant	L100000103843	G100000106773	US8425871071	1	985.6	985.6	45	2019	2059	2099
coal	United States	Americas	Northern America	Miller Steam Plant	Unit 1		James H. Miller Jr. Steam Plant	705.5	operating	1978		subcritical	subbituminous					Alabama Power [91%]; PowerSouth Energy Cooperative [8%]	Southern Co [91.8%]; PowerSouth Energy Cooperative [8.2%]	33.6332	-87.0598	exact	West Jefferson	Jefferson		Alabama	https://www.gem.wiki/Miller_Steam_Plant	L100000103783	G100000106922	US8425871071	0.918	2822		46	2018	2058	2098
coal	United States	Americas	Northern America	Miller Steam Plant	Unit 2		James H. Miller Jr. Steam Plant	705.5	operating	1985		subcritical	subbituminous					Alabama Power [91%]; PowerSouth Energy Cooperative [8%]	Southern Co [91.8%]; PowerSouth Energy Cooperative [8.2%]	33.6332	-87.0598	exact	West Jefferson	Jefferson		Alabama	https://www.gem.wiki/Miller_Steam_Plant	L100000103783	G100000106923	US8425871071	0.918	2822		39	2025	2065	2105
coal	United States	Americas	Northern America	Miller Steam Plant	Unit 3		James H. Miller Jr. Steam Plant	705.5	operating	1989		subcritical	subbituminous					Alabama Power [100%]	Southern Co [100.0%]	33.6332	-87.0598	exact	West Jefferson	Jefferson		Alabama	https://www.gem.wiki/Miller_Steam_Plant	L100000103783	G100000106924	US8425871071	1	2822		35	2029	2069	2109
coal	United States	Americas	Northern America	Miller Steam Plant	Unit 4		James H. Miller Jr. Steam Plant	705.5	operating	1991		subcritical	subbituminous					Alabama Power [100%]	Southern Co [100.0%]	33.6332	-87.0598	exact	West Jefferson	Jefferson		Alabama	https://www.gem.wiki/Miller_Steam_Plant	L100000103783	G100000106925	US8425871071	1	2822	2822	33	2031	2071	2111
coal	United States	Americas	Northern America	Mitchell Steam Generating Plant (Georgia)	Unit 3			163.2	retired	1964	2015	subcritical	bituminous					Georgia Power [100%]	Southern Co [100.0%]	31.4447	-84.134	exact	Albany	Dougherty		Georgia	https://www.gem.wiki/Mitchell_Steam_Generating_Plant_(Georgia)	L100000103844	G100000106958	US8425871071	1	163.2	163.2	60	2004	2044	2084
coal	United States	Americas	Northern America	Plant Bowen	Unit 1			805.8	operating	1971	2028	supercritical	bituminous					Georgia Power [100%]	Southern Co [100.0%]	34.126	-84.9207	exact	Taylorsville	Bartow		Georgia	https://www.gem.wiki/Plant_Bowen	L100000103845	G100000108023	US8425871071	1	3498.6		53	2011	2051	2091
coal	United States	Americas	Northern America	Plant Bowen	Unit 2			788.8	operating	1972	2028	supercritical	bituminous					Georgia Power [100%]	Southern Co [100.0%]	34.126	-84.9207	exact	Taylorsville	Bartow		Georgia	https://www.gem.wiki/Plant_Bowen	L100000103845	G100000108024	US8425871071	1	3498.6		52	2012	2052	2092
coal	United States	Americas	Northern America	Plant Bowen	Unit 3			952	operating	1974	2035	supercritical	bituminous					Georgia Power [100%]	Southern Co [100.0%]	34.126	-84.9207	exact	Taylorsville	Bartow		Georgia	https://www.gem.wiki/Plant_Bowen	L100000103845	G100000108025	US8425871071	1	3498.6		50	2014	2054	2094
coal	United States	Americas	Northern America	Plant Bowen	Unit 4			952	operating	1975	2035	supercritical	bituminous					Georgia Power [100%]	Southern Co [100.0%]	34.126	-84.9207	exact	Taylorsville	Bartow		Georgia	https://www.gem.wiki/Plant_Bowen	L100000103845	G100000108026	US8425871071	1	3498.6	3498.6	49	2015	2055	2095
coal	United States	Americas	Northern America	Red Hills Generation Facility	Unit 1			513.7	operating	2001		subcritical	lignite					S E Choctaw [100%]	Southern Co [100.0%]	33.3762	-89.2185	exact	Red Hills	Choctaw		Mississippi	https://www.gem.wiki/Red_Hills_Generation_Facility	L100000104012	G100000108505	US8425871071	1	513.7	513.7	23	2041	2081	2121
coal	United States	Americas	Northern America	Scherer Steam Generating Station	Unit 1			891	operating	1982		subcritical	subbituminous					other unknown/mixed entity types [1%]; Oglethorpe Power [60%]; Municipal Electric Authority of Georgia [30%]; Georgia Power [8%]	Oglethorpe Power [60.0%]; Municipal Electric Authority of Georgia [30.2%]; Southern Co [8.4%]; other unknown/mixed entity types [1.4%]	33.0603	-83.8069	exact	Juliette	Monroe		Georgia	https://www.gem.wiki/Scherer_Steam_Generating_Station	L100000103847	G100000108869	US8425871071	0.084	2673		42	2022	2062	2102
coal	United States	Americas	Northern America	Scherer Steam Generating Station	Unit 2			891	operating	1984		subcritical	subbituminous					Municipal Electric Authority of Georgia [30%]; Oglethorpe Power [60%]; Georgia Power [8%]; other unknown/mixed entity types [1%]	Oglethorpe Power [60.0%]; Municipal Electric Authority of Georgia [30.2%]; Southern Co [8.4%]; other unknown/mixed entity types [1.4%]	33.0603	-83.8069	exact	Juliette	Monroe		Georgia	https://www.gem.wiki/Scherer_Steam_Generating_Station	L100000103847	G100000108870	US8425871071	0.084	2673		40	2024	2064	2104
coal	United States	Americas	Northern America	Scherer Steam Generating Station	Unit 3			891	operating	1987	2028	subcritical	subbituminous					Florida Power & Light [25%]; Georgia Power [75%]	Southern Co [75.0%]; NextEra Energy Inc [25.0%]	33.0603	-83.8069	exact	Juliette	Monroe		Georgia	https://www.gem.wiki/Scherer_Steam_Generating_Station	L100000103847	G100000108871	US8425871071	0.75	2673	2673	37	2027	2067	2107
coal	United States	Americas	Northern America	Wansley Plant	Unit 1			952	retired	1976	2022	supercritical	bituminous					Oglethorpe Power [30%]; Municipal Electric Authority of Georgia [15%]; Georgia Power [53%]; other unknown/mixed entity types [1%]	Southern Co [53.5%]; Oglethorpe Power [30.0%]; Municipal Electric Authority of Georgia [15.1%]; other unknown/mixed entity types [1.4%]	33.4127	-85.0339	exact	Roopville	Heard		Georgia	https://www.gem.wiki/Wansley_Plant	L100000103848	G100000110728	US8425871071	0.535	3144		48	2016	2056	2096
coal	United States	Americas	Northern America	Wansley Plant	Unit 2			952	retired	1978	2022	supercritical	bituminous					Oglethorpe Power [30%]; Municipal Electric Authority of Georgia [15%]; Georgia Power [53%]; other unknown/mixed entity types [1%]	Southern Co [53.5%]; Oglethorpe Power [30.0%]; Municipal Electric Authority of Georgia [15.1%]; other unknown/mixed entity types [1.4%]	33.4127	-85.0339	exact	Roopville	Heard		Georgia	https://www.gem.wiki/Wansley_Plant	L100000103848	G100000110729	US8425871071	0.535	3144	3144	46	2018	2058	2098
coal	United States	Americas	Northern America	Yates Steam Generating Plant	Unit 1			122.5	retired	1950	2015	subcritical	bituminous					Georgia Power [100%]	Southern Co [100.0%]	33.4625	-84.902	exact	Whitesburg	Coweta		Georgia	https://www.gem.wiki/Yates_Steam_Generating_Plant	L100000103850	G100000111336	US8425871071	1	2295.3		74	1990	2030	2070
coal	United States	Americas	Northern America	Yates Steam Generating Plant	Unit 2			122.5	retired	1950	2015	subcritical	bituminous					Georgia Power [100%]	Southern Co [100.0%]	33.4625	-84.902	exact	Whitesburg	Coweta		Georgia	https://www.gem.wiki/Yates_Steam_Generating_Plant	L100000103850	G100000111337	US8425871071	1	2295.3		74	1990	2030	2070
coal	United States	Americas	Northern America	Yates Steam Generating Plant	Unit 3			122.5	retired	1952	2015	subcritical	bituminous					Georgia Power [100%]	Southern Co [100.0%]	33.4625	-84.902	exact	Whitesburg	Coweta		Georgia	https://www.gem.wiki/Yates_Steam_Generating_Plant	L100000103850	G100000111338	US8425871071	1	2295.3		72	1992	2032	2072
coal	United States	Americas	Northern America	Yates Steam Generating Plant	Unit 4			156.2	retired	1957	2015	subcritical	bituminous					Georgia Power [100%]	Southern Co [100.0%]	33.4625	-84.902	exact	Whitesburg	Coweta		Georgia	https://www.gem.wiki/Yates_Steam_Generating_Plant	L100000103850	G100000111339	US8425871071	1	2295.3		67	1997	2037	2077
coal	United States	Americas	Northern America	Yates Steam Generating Plant	Unit 5			156.2	retired	1958	2015	subcritical	bituminous					Georgia Power [100%]	Southern Co [100.0%]	33.4625	-84.902	exact	Whitesburg	Coweta		Georgia	https://www.gem.wiki/Yates_Steam_Generating_Plant	L100000103850	G100000111340	US8425871071	1	2295.3		66	1998	2038	2078
coal	United States	Americas	Northern America	Yates Steam Generating Plant	Unit 6			403.7	retired	1974	2015	subcritical	bituminous					Georgia Power [100%]	Southern Co [100.0%]	33.4625	-84.902	exact	Whitesburg	Coweta		Georgia	https://www.gem.wiki/Yates_Steam_Generating_Plant	L100000103850	G100000111341	US8425871071	1	2295.3		50	2014	2054	2094
coal	United States	Americas	Northern America	Yates Steam Generating Plant	Unit 7			403.7	retired	1974	2015	subcritical	bituminous					Georgia Power [100%]	Southern Co [100.0%]	33.4625	-84.902	exact	Whitesburg	Coweta		Georgia	https://www.gem.wiki/Yates_Steam_Generating_Plant	L100000103850	G100000111342	US8425871071	1	2295.3	2295.3	50	2014	2054	2094
nuclear	United States	Americas	Northern America	William States Lee III nuclear power plant	1			1117	cancelled			pressurized water reactor						Duke Energy Carolinas LLC;Southern Company		35.0366	-81.5108	exact		Cherokee County		South Carolina	https://gem.wiki/William_States_Lee_III_nuclear_power_plant	L500515	G501483	US8425871071	0.5	2234		-99	40	80	120
nuclear	United States	Americas	Northern America	William States Lee III nuclear power plant	2			1117	cancelled			pressurized water reactor						Duke Energy Carolinas LLC;Southern Company		35.0366	-81.5108	exact		Cherokee County		South Carolina	https://gem.wiki/William_States_Lee_III_nuclear_power_plant	L500515	G501484	US8425871071	0.5	2234	2234	-99	40	80	120
oil/gas	United States	Americas	Northern America	Barry Steam Plant	G521		James M. Barry Electric Generating Plant	535	operating	2000		CC	NG					Alabama Power Co [100.0%]	Southern Co [100.0%]	31.0069	-88.0103	exact	Bucks	Mobile		Alabama	https://www.gem.wiki/Barry_Steam_Plant	L100000103776	G100000401686	US8425871071	1	4270.7		24	2040	2080	2120
oil/gas	United States	Americas	Northern America	Barry Steam Plant	G522		James M. Barry Electric Generating Plant	535	operating	2000		CC	NG					Alabama Power Co [100.0%]	Southern Co [100.0%]	31.0069	-88.0103	exact	Bucks	Mobile		Alabama	https://www.gem.wiki/Barry_Steam_Plant	L100000103776	G100000401687	US8425871071	1	4270.7		24	2040	2080	2120
oil/gas	United States	Americas	Northern America	Barry Steam Plant	1		James M. Barry Electric Generating Plant	153	operating	2015		ST	NG					Alabama Power Co [100.0%]	Southern Co [100.0%]	31.0069	-88.0103	exact	Bucks	Mobile		Alabama	https://www.gem.wiki/Barry_Steam_Plant	L100000103776	G100000402400	US8425871071	1	4270.7		9	2055	2095	2135
oil/gas	United States	Americas	Northern America	Barry Steam Plant	2		James M. Barry Electric Generating Plant	153	operating	2015		ST	NG					Alabama Power Co [100.0%]	Southern Co [100.0%]	31.0069	-88.0103	exact	Bucks	Mobile		Alabama	https://www.gem.wiki/Barry_Steam_Plant	L100000103776	G100000402401	US8425871071	1	4270.7		9	2055	2095	2135
oil/gas	United States	Americas	Northern America	Barry Steam Plant	G523		James M. Barry Electric Generating Plant	774	operating	2023		CC	NG					Alabama Power Co [100.0%]	Southern Co [100.0%]	31.0069	-88.0103	exact	Bucks	Mobile		Alabama	https://www.gem.wiki/Barry_Steam_Plant	L100000103776	G100000409443	US8425871071	1	4270.7		1	2063	2103	2143
oil/gas	United States	Americas	Northern America	Barry Steam Plant	4		James M. Barry Electric Generating Plant	350	pre-construction	2028		ST	NG					Alabama Power Co [100.0%]	Southern Co [100.0%]	31.0069	-88.0103	exact	Bucks	Mobile		Alabama	https://www.gem.wiki/Barry_Steam_Plant	L100000103776	G100000410538	US8425871071	1	4270.7	4270.7	-4	2068	2108	2148
oil/gas	United States	Americas	Northern America	Chevron Oil power station	5			101	operating	1994		GT	NG					Mississippi Power Co [100.0%]	Southern Co [100.0%]	30.34	-88.4919	exact	Pascagoula	Jackson		Mississippi	https://www.gem.wiki/Chevron_Oil_power_station	L100000402094	G100000403187	US8425871071	1	101	101	30	2034	2074	2114
oil/gas	United States	Americas	Northern America	Cleveland County generating facility	1			184	operating	2012		GT	NG/FO					Southern Power Co [100.0%]	Southern Co [100.0%]	35.1705	-81.4167	exact	Kings Mountain	Cleveland		North Carolina	https://www.gem.wiki/Cleveland_County_generating_facility	L100000402282	G100000403518	US8425871071	1	736		12	2052	2092	2132
oil/gas	United States	Americas	Northern America	Cleveland County generating facility	2			184	operating	2012		GT	NG/FO					Southern Power Co [100.0%]	Southern Co [100.0%]	35.1705	-81.4167	exact	Kings Mountain	Cleveland		North Carolina	https://www.gem.wiki/Cleveland_County_generating_facility	L100000402282	G100000403519	US8425871071	1	736		12	2052	2092	2132
oil/gas	United States	Americas	Northern America	Cleveland County generating facility	3			184	operating	2012		GT	NG/FO					Southern Power Co [100.0%]	Southern Co [100.0%]	35.1705	-81.4167	exact	Kings Mountain	Cleveland		North Carolina	https://www.gem.wiki/Cleveland_County_generating_facility	L100000402282	G100000403520	US8425871071	1	736		12	2052	2092	2132
oil/gas	United States	Americas	Northern America	Cleveland County generating facility	4			184	operating	2012		GT	NG/FO					Southern Power Co [100.0%]	Southern Co [100.0%]	35.1705	-81.4167	exact	Kings Mountain	Cleveland		North Carolina	https://www.gem.wiki/Cleveland_County_generating_facility	L100000402282	G100000403521	US8425871071	1	736	736	12	2052	2092	2132
oil/gas	United States	Americas	Northern America	Dahlberg power station	1			92	operating	2000		GT	NG/FO					Southern Power Co [100.0%]	Southern Co [100.0%]	34.0423	-83.3977	exact	Nicholson	Jackson		Georgia	https://www.gem.wiki/Dahlberg_power_station	L100000402283	G100000403522	US8425871071	1	920		24	2040	2080	2120
oil/gas	United States	Americas	Northern America	Dahlberg power station	2			92	operating	2000		GT	NG/FO					Southern Power Co [100.0%]	Southern Co [100.0%]	34.0423	-83.3977	exact	Nicholson	Jackson		Georgia	https://www.gem.wiki/Dahlberg_power_station	L100000402283	G100000403524	US8425871071	1	920		24	2040	2080	2120
oil/gas	United States	Americas	Northern America	Dahlberg power station	3			92	operating	2000		GT	NG/FO					Southern Power Co [100.0%]	Southern Co [100.0%]	34.0423	-83.3977	exact	Nicholson	Jackson		Georgia	https://www.gem.wiki/Dahlberg_power_station	L100000402283	G100000403525	US8425871071	1	920		24	2040	2080	2120
oil/gas	United States	Americas	Northern America	Dahlberg power station	4			92	operating	2000		GT	NG/FO					Southern Power Co [100.0%]	Southern Co [100.0%]	34.0423	-83.3977	exact	Nicholson	Jackson		Georgia	https://www.gem.wiki/Dahlberg_power_station	L100000402283	G100000403526	US8425871071	1	920		24	2040	2080	2120
oil/gas	United States	Americas	Northern America	Dahlberg power station	5			92	operating	2000		GT	NG/FO					Southern Power Co [100.0%]	Southern Co [100.0%]	34.0423	-83.3977	exact	Nicholson	Jackson		Georgia	https://www.gem.wiki/Dahlberg_power_station	L100000402283	G100000403527	US8425871071	1	920		24	2040	2080	2120
oil/gas	United States	Americas	Northern America	Dahlberg power station	6			92	operating	2000		GT	NG/FO					Southern Power Co [100.0%]	Southern Co [100.0%]	34.0423	-83.3977	exact	Nicholson	Jackson		Georgia	https://www.gem.wiki/Dahlberg_power_station	L100000402283	G100000403528	US8425871071	1	920		24	2040	2080	2120
oil/gas	United States	Americas	Northern America	Dahlberg power station	7			92	operating	2000		GT	NG/FO					Southern Power Co [100.0%]	Southern Co [100.0%]	34.0423	-83.3977	exact	Nicholson	Jackson		Georgia	https://www.gem.wiki/Dahlberg_power_station	L100000402283	G100000403529	US8425871071	1	920		24	2040	2080	2120
oil/gas	United States	Americas	Northern America	Dahlberg power station	8			92	operating	2000		GT	NG/FO					Southern Power Co [100.0%]	Southern Co [100.0%]	34.0423	-83.3977	exact	Nicholson	Jackson		Georgia	https://www.gem.wiki/Dahlberg_power_station	L100000402283	G100000403530	US8425871071	1	920		24	2040	2080	2120
oil/gas	United States	Americas	Northern America	Dahlberg power station	9			92	operating	2001		GT	NG/FO					Southern Power Co [100.0%]	Southern Co [100.0%]	34.0423	-83.3977	exact	Nicholson	Jackson		Georgia	https://www.gem.wiki/Dahlberg_power_station	L100000402283	G100000403531	US8425871071	1	920		23	2041	2081	2121
oil/gas	United States	Americas	Northern America	Dahlberg power station	10			92	operating	2001		GT	NG/FO					Southern Power Co [100.0%]	Southern Co [100.0%]	34.0423	-83.3977	exact	Nicholson	Jackson		Georgia	https://www.gem.wiki/Dahlberg_power_station	L100000402283	G100000403523	US8425871071	1	920	920	23	2041	2081	2121
oil/gas	United States	Americas	Northern America	E B Harris Electric generating plant	G103			652	operating	2003		CC	NG					Southern Power Co [100.0%]	Southern Co [100.0%]	32.3814	-86.5744	exact	Autaugaville	Autauga		Alabama	https://www.gem.wiki/E_B_Harris_Electric_generating_plant	L100000402284	G100000402182	US8425871071	1	1304		21	2043	2083	2123
oil/gas	United States	Americas	Northern America	E B Harris Electric generating plant	G104			652	operating	2003		CC	NG					Southern Power Co [100.0%]	Southern Co [100.0%]	32.3814	-86.5744	exact	Autaugaville	Autauga		Alabama	https://www.gem.wiki/E_B_Harris_Electric_generating_plant	L100000402284	G100000402183	US8425871071	1	1304	1304	21	2043	2083	2123
oil/gas	United States	Americas	Northern America	Edward L. Addison generating plant	712			175	operating	2000		GT	NG/FO					Southern Power Co [100.0%]	Southern Co [100.0%]	32.9111	-84.3064	exact	Thomaston	Upson		Georgia	https://www.gem.wiki/Edward_L._Addison_generating_plant	L100000402285	G100000403532	US8425871071	1	700		24	2040	2080	2120
oil/gas	United States	Americas	Northern America	Edward L. Addison generating plant	713			175	operating	2000		GT	NG/FO					Southern Power Co [100.0%]	Southern Co [100.0%]	32.9111	-84.3064	exact	Thomaston	Upson		Georgia	https://www.gem.wiki/Edward_L._Addison_generating_plant	L100000402285	G100000403533	US8425871071	1	700		24	2040	2080	2120
oil/gas	United States	Americas	Northern America	Edward L. Addison generating plant	714			175	operating	2000		GT	NG/FO					Southern Power Co [100.0%]	Southern Co [100.0%]	32.9111	-84.3064	exact	Thomaston	Upson		Georgia	https://www.gem.wiki/Edward_L._Addison_generating_plant	L100000402285	G100000403534	US8425871071	1	700		24	2040	2080	2120
oil/gas	United States	Americas	Northern America	Edward L. Addison generating plant	715			175	operating	2000		GT	NG/FO					Southern Power Co [100.0%]	Southern Co [100.0%]	32.9111	-84.3064	exact	Thomaston	Upson		Georgia	https://www.gem.wiki/Edward_L._Addison_generating_plant	L100000402285	G100000403535	US8425871071	1	700	700	24	2040	2080	2120
oil/gas	United States	Americas	Northern America	Gadsden Steam Plant	1			69	retired	2015	2023	ST	NG					Alabama Power Co [100.0%]	Southern Co [100.0%]	34.0128	-85.9708	exact	Gadsden	Etowah		Alabama	https://www.gem.wiki/Gadsden_Steam_Plant	L100000103779	G100000402402	US8425871071	1	276		9	2055	2095	2135
oil/gas	United States	Americas	Northern America	Gadsden Steam Plant	2			69	retired	2015	2023	ST	NG					Alabama Power Co [100.0%]	Southern Co [100.0%]	34.0128	-85.9708	exact	Gadsden	Etowah		Alabama	https://www.gem.wiki/Gadsden_Steam_Plant	L100000103779	G100000402403	US8425871071	1	276	276	9	2055	2095	2135
oil/gas	United States	Americas	Northern America	Gaston Steam Plant	1		E.C. Gaston Steam Plant	272	operating	2015	2028	ST	NG/C					Alabama Power Co [50.0%]; Georgia Power Co [50.0%]	Southern Co [50.0%]; Southern Co [50.0%]	33.2442	-86.4581	exact	Wilsonville	Shelby		Alabama	https://www.gem.wiki/Gaston_Steam_Plant	L100000103780	G100000402200	US8425871071	0.5	4025.8		9	2055	2095	2135
oil/gas	United States	Americas	Northern America	Gaston Steam Plant	2		E.C. Gaston Steam Plant	272	operating	2015	2028	ST	NG/C					Alabama Power Co [50.0%]; Georgia Power Co [50.0%]	Southern Co [50.0%]; Southern Co [50.0%]	33.2442	-86.4581	exact	Wilsonville	Shelby		Alabama	https://www.gem.wiki/Gaston_Steam_Plant	L100000103780	G100000402201	US8425871071	0.5	4025.8		9	2055	2095	2135
oil/gas	United States	Americas	Northern America	Gaston Steam Plant	3		E.C. Gaston Steam Plant	272	operating	2015	2028	ST	NG/C					Alabama Power Co [50.0%]; Georgia Power Co [50.0%]	Southern Co [50.0%]; Southern Co [50.0%]	33.2442	-86.4581	exact	Wilsonville	Shelby		Alabama	https://www.gem.wiki/Gaston_Steam_Plant	L100000103780	G100000402202	US8425871071	0.5	4025.8		9	2055	2095	2135
oil/gas	United States	Americas	Northern America	Gaston Steam Plant	ST4		E.C. Gaston Steam Plant	245	operating	2015	2028	ST	NG/C					Alabama Power Co [50.0%]; Georgia Power Co [50.0%]	Southern Co [50.0%]; Southern Co [50.0%]	33.2442	-86.4581	exact	Wilsonville	Shelby		Alabama	https://www.gem.wiki/Gaston_Steam_Plant	L100000103780	G100000402203	US8425871071	0.5	4025.8		9	2055	2095	2135
oil/gas	United States	Americas	Northern America	Gaston Steam Plant	5		E.C. Gaston Steam Plant	952	announced	2028		ST	NG					Alabama Power Co [50.0%]; Georgia Power Co [50.0%]	Southern Co [50.0%]; Southern Co [50.0%]	33.2442	-86.4581	exact	Wilsonville	Shelby		Alabama	https://www.gem.wiki/Gaston_Steam_Plant	L100000103780	G100000410528	US8425871071	0.5	4025.8	4025.8	-4	2068	2108	2148
oil/gas	United States	Americas	Northern America	General Electric Plastic power station	G524			97	operating	1999		CC	NG					Alabama Power Co [100.0%]	Southern Co [100.0%]	32.3102	-86.5254	exact	Burkeville	Lowndes		Alabama	https://www.gem.wiki/General_Electric_Plastic_power_station	L100000401697	G100000402163	US8425871071	1	97	97	25	2039	2079	2119
oil/gas	United States	Americas	Northern America	Greene County Steam Plant	GT3			80	operating	1995		GT	FO/NG					Alabama Power Co [100.0%]	Southern Co [100.0%]	32.6017	-87.7811	exact	Demopolis	Greene		Alabama	https://www.gem.wiki/Greene_County_Steam_Plant	L100000103782	G100000402406	US8425871071	1	1856.4		29	2035	2075	2115
oil/gas	United States	Americas	Northern America	Greene County Steam Plant	GT4			80	operating	1995		GT	FO/NG					Alabama Power Co [100.0%]	Southern Co [100.0%]	32.6017	-87.7811	exact	Demopolis	Greene		Alabama	https://www.gem.wiki/Greene_County_Steam_Plant	L100000103782	G100000402407	US8425871071	1	1856.4		29	2035	2075	2115
oil/gas	United States	Americas	Northern America	Greene County Steam Plant	GT5			80	operating	1995		GT	FO/NG					Alabama Power Co [100.0%]	Southern Co [100.0%]	32.6017	-87.7811	exact	Demopolis	Greene		Alabama	https://www.gem.wiki/Greene_County_Steam_Plant	L100000103782	G100000402408	US8425871071	1	1856.4		29	2035	2075	2115
oil/gas	United States	Americas	Northern America	Greene County Steam Plant	GT6			80	operating	1995		GT	FO/NG					Alabama Power Co [100.0%]	Southern Co [100.0%]	32.6017	-87.7811	exact	Demopolis	Greene		Alabama	https://www.gem.wiki/Greene_County_Steam_Plant	L100000103782	G100000402409	US8425871071	1	1856.4		29	2035	2075	2115
oil/gas	United States	Americas	Northern America	Greene County Steam Plant	GT7			80	operating	1995		GT	FO/NG					Alabama Power Co [100.0%]	Southern Co [100.0%]	32.6017	-87.7811	exact	Demopolis	Greene		Alabama	https://www.gem.wiki/Greene_County_Steam_Plant	L100000103782	G100000402410	US8425871071	1	1856.4		29	2035	2075	2115
oil/gas	United States	Americas	Northern America	Greene County Steam Plant	GT10			80	operating	1996		GT	FO/NG					Alabama Power Co [100.0%]	Southern Co [100.0%]	32.6017	-87.7811	exact	Demopolis	Greene		Alabama	https://www.gem.wiki/Greene_County_Steam_Plant	L100000103782	G100000402404	US8425871071	1	1856.4		28	2036	2076	2116
oil/gas	United States	Americas	Northern America	Greene County Steam Plant	GT2			80	operating	1996		GT	FO/NG					Alabama Power Co [100.0%]	Southern Co [100.0%]	32.6017	-87.7811	exact	Demopolis	Greene		Alabama	https://www.gem.wiki/Greene_County_Steam_Plant	L100000103782	G100000402405	US8425871071	1	1856.4		28	2036	2076	2116
oil/gas	United States	Americas	Northern America	Greene County Steam Plant	GT8			80	operating	1996		GT	FO/NG					Alabama Power Co [100.0%]	Southern Co [100.0%]	32.6017	-87.7811	exact	Demopolis	Greene		Alabama	https://www.gem.wiki/Greene_County_Steam_Plant	L100000103782	G100000402411	US8425871071	1	1856.4		28	2036	2076	2116
oil/gas	United States	Americas	Northern America	Greene County Steam Plant	GT9			80	operating	1996		GT	FO/NG					Alabama Power Co [100.0%]	Southern Co [100.0%]	32.6017	-87.7811	exact	Demopolis	Greene		Alabama	https://www.gem.wiki/Greene_County_Steam_Plant	L100000103782	G100000402412	US8425871071	1	1856.4		28	2036	2076	2116
oil/gas	United States	Americas	Northern America	Greene County Steam Plant	1			299	operating	2016		ST	NG					Alabama Power Co [60.0%]; Mississippi Power Co [40.0%]	Southern Co [60.0%]; Southern Co [40.0%]	32.6017	-87.7811	exact	Demopolis	Greene		Alabama	https://www.gem.wiki/Greene_County_Steam_Plant	L100000103782	G100000402204	US8425871071	0.6	1856.4		8	2056	2096	2136
oil/gas	United States	Americas	Northern America	Greene County Steam Plant	2			269	operating	2016		ST	NG					Alabama Power Co [60.0%]; Mississippi Power Co [40.0%]	Southern Co [60.0%]; Southern Co [40.0%]	32.6017	-87.7811	exact	Demopolis	Greene		Alabama	https://www.gem.wiki/Greene_County_Steam_Plant	L100000103782	G100000402205	US8425871071	0.6	1856.4	1856.4	8	2056	2096	2136
oil/gas	United States	Americas	Northern America	H Allen Franklin Combined Cycle power station	G481			620	operating	2002		CC	NG					Southern Power Co [100.0%]	Southern Co [100.0%]	32.6078	-85.0975	exact	Smiths	Lee		Alabama	https://www.gem.wiki/H_Allen_Franklin_Combined_Cycle_power_station	L100000402286	G100000402166	US8425871071	1	1996		22	2042	2082	2122
oil/gas	United States	Americas	Northern America	H Allen Franklin Combined Cycle power station	G501			688	operating	2002		CC	NG					Southern Power Co [100.0%]	Southern Co [100.0%]	32.6078	-85.0975	exact	Smiths	Lee		Alabama	https://www.gem.wiki/H_Allen_Franklin_Combined_Cycle_power_station	L100000402286	G100000402167	US8425871071	1	1996		22	2042	2082	2122
oil/gas	United States	Americas	Northern America	H Allen Franklin Combined Cycle power station	G100			688	operating	2008		CC	NG					Southern Power Co [100.0%]	Southern Co [100.0%]	32.6078	-85.0975	exact	Smiths	Lee		Alabama	https://www.gem.wiki/H_Allen_Franklin_Combined_Cycle_power_station	L100000402286	G100000402165	US8425871071	1	1996	1996	16	2048	2088	2128
oil/gas	United States	Americas	Northern America	Intercession City power station	P11			148.5	operating	1997		GT	FO					Duke Energy Florida LLC [66.7%]; Georgia Power Co [33.3%]	Duke Energy Corp [66.7%]; Southern Co [33.3%]	28.2628	-81.5486	exact	Intercession City	Osceola		Florida	https://www.gem.wiki/Intercession_City_power_station	L100000401869	G100000414252	US8425871071	0.333	148.5	148.5	27	2037	2077	2117
oil/gas	United States	Americas	Northern America	Jack Watson Generating Plant	4			299	operating	2015	2023	ST	NG					Mississippi Power Co [100.0%]	Southern Co [100.0%]	30.4392	-89.0286	exact	Gulfport	Harrison		Mississippi	https://www.gem.wiki/Jack_Watson_Generating_Plant	L100000104009	G100000403188	US8425871071	1	1754.2		9	2055	2095	2135
oil/gas	United States	Americas	Northern America	Jack Watson Generating Plant	5			578	operating	2015		ST	NG					Mississippi Power Co [100.0%]	Southern Co [100.0%]	30.4392	-89.0286	exact	Gulfport	Harrison		Mississippi	https://www.gem.wiki/Jack_Watson_Generating_Plant	L100000104009	G100000403189	US8425871071	1	1754.2	1754.2	9	2055	2095	2135
oil/gas	United States	Americas	Northern America	McDonough Steam Generating Plant	G104		Atkinson power station/Jack McDonough Steam Generating Plant	922	operating	2011		CC	NG/FO					Georgia Power Co [100.0%]	Southern Co [100.0%]	33.8239	-84.4758	exact	Smyrna	Cobb		Georgia	https://www.gem.wiki/McDonough_Steam_Generating_Plant	L100000103842	G100000402137	US8425871071	1	3364.4		13	2051	2091	2131
oil/gas	United States	Americas	Northern America	McDonough Steam Generating Plant	G105		Atkinson power station/Jack McDonough Steam Generating Plant	922	operating	2012		CC	NG/FO					Georgia Power Co [100.0%]	Southern Co [100.0%]	33.8239	-84.4758	exact	Smyrna	Cobb		Georgia	https://www.gem.wiki/McDonough_Steam_Generating_Plant	L100000103842	G100000402138	US8425871071	1	3364.4		12	2052	2092	2132
oil/gas	United States	Americas	Northern America	McDonough Steam Generating Plant	G106		Atkinson power station/Jack McDonough Steam Generating Plant	922	operating	2012		CC	NG/FO					Georgia Power Co [100.0%]	Southern Co [100.0%]	33.8239	-84.4758	exact	Smyrna	Cobb		Georgia	https://www.gem.wiki/McDonough_Steam_Generating_Plant	L100000103842	G100000402139	US8425871071	1	3364.4	3364.4	12	2052	2092	2132
oil/gas	United States	Americas	Northern America	McIntosh Combined Cycle Facility	G110			688	operating	2005		CC	NG					Georgia Power Co [100.0%]	Southern Co [100.0%]	32.3478	-81.1817	exact	Rincon	Effingham		Georgia	https://www.gem.wiki/McIntosh_Combined_Cycle_Facility	L100000401979	G100000402001	US8425871071	1	1376		19	2045	2085	2125
oil/gas	United States	Americas	Northern America	McIntosh Combined Cycle Facility	G111			688	operating	2005		CC	NG					Georgia Power Co [100.0%]	Southern Co [100.0%]	32.3478	-81.1817	exact	Rincon	Effingham		Georgia	https://www.gem.wiki/McIntosh_Combined_Cycle_Facility	L100000401979	G100000402002	US8425871071	1	1376	1376	19	2045	2085	2125
oil/gas	United States	Americas	Northern America	McIntosh Steam Plant	CT3			101	operating	1994		GT	NG/FO					Georgia Power Co [100.0%]	Southern Co [100.0%]	32.3563	-81.1684	exact	Rincon	Effingham		Georgia	https://www.gem.wiki/McIntosh_Steam_Plant	L100000103843	G100000402947	US8425871071	1	985.6		30	2034	2074	2114
oil/gas	United States	Americas	Northern America	McIntosh Steam Plant	CT4			101	operating	1994		GT	NG/FO					Georgia Power Co [100.0%]	Southern Co [100.0%]	32.3563	-81.1684	exact	Rincon	Effingham		Georgia	https://www.gem.wiki/McIntosh_Steam_Plant	L100000103843	G100000402948	US8425871071	1	985.6		30	2034	2074	2114
oil/gas	United States	Americas	Northern America	McIntosh Steam Plant	CT5			101	operating	1994		GT	NG/FO					Georgia Power Co [100.0%]	Southern Co [100.0%]	32.3563	-81.1684	exact	Rincon	Effingham		Georgia	https://www.gem.wiki/McIntosh_Steam_Plant	L100000103843	G100000402949	US8425871071	1	985.6		30	2034	2074	2114
oil/gas	United States	Americas	Northern America	McIntosh Steam Plant	CT6			101	operating	1994		GT	NG/FO					Georgia Power Co [100.0%]	Southern Co [100.0%]	32.3563	-81.1684	exact	Rincon	Effingham		Georgia	https://www.gem.wiki/McIntosh_Steam_Plant	L100000103843	G100000402950	US8425871071	1	985.6		30	2034	2074	2114
oil/gas	United States	Americas	Northern America	McIntosh Steam Plant	CT7			101	operating	1994		GT	NG/FO					Georgia Power Co [100.0%]	Southern Co [100.0%]	32.3563	-81.1684	exact	Rincon	Effingham		Georgia	https://www.gem.wiki/McIntosh_Steam_Plant	L100000103843	G100000402951	US8425871071	1	985.6		30	2034	2074	2114
oil/gas	United States	Americas	Northern America	McIntosh Steam Plant	CT8			101	operating	1994		GT	NG/FO					Georgia Power Co [100.0%]	Southern Co [100.0%]	32.3563	-81.1684	exact	Rincon	Effingham		Georgia	https://www.gem.wiki/McIntosh_Steam_Plant	L100000103843	G100000402952	US8425871071	1	985.6		30	2034	2074	2114
oil/gas	United States	Americas	Northern America	McIntosh Steam Plant	CT1			101	operating	1995		GT	NG/FO					Georgia Power Co [100.0%]	Southern Co [100.0%]	32.3563	-81.1684	exact	Rincon	Effingham		Georgia	https://www.gem.wiki/McIntosh_Steam_Plant	L100000103843	G100000402945	US8425871071	1	985.6		29	2035	2075	2115
oil/gas	United States	Americas	Northern America	McIntosh Steam Plant	CT2			101	operating	1995		GT	NG/FO					Georgia Power Co [100.0%]	Southern Co [100.0%]	32.3563	-81.1684	exact	Rincon	Effingham		Georgia	https://www.gem.wiki/McIntosh_Steam_Plant	L100000103843	G100000402946	US8425871071	1	985.6	985.6	29	2035	2075	2115
oil/gas	United States	Americas	Northern America	McManus power station	3A			55.4	operating	1972		GT	FO					Georgia Power Co [100.0%]	Southern Co [100.0%]	31.2136	-81.5462	exact	Brunswick	Glynn		Georgia	https://www.gem.wiki/McManus_power_station	L100000409266	G100000414239	US8425871071	1	558		52	2012	2052	2092
oil/gas	United States	Americas	Northern America	McManus power station	3B			55.4	operating	1972		GT	FO					Georgia Power Co [100.0%]	Southern Co [100.0%]	31.2136	-81.5462	exact	Brunswick	Glynn		Georgia	https://www.gem.wiki/McManus_power_station	L100000409266	G100000414238	US8425871071	1	558		52	2012	2052	2092
oil/gas	United States	Americas	Northern America	McManus power station	3C			55.4	operating	1972		GT	FO					Georgia Power Co [100.0%]	Southern Co [100.0%]	31.2136	-81.5462	exact	Brunswick	Glynn		Georgia	https://www.gem.wiki/McManus_power_station	L100000409266	G100000414237	US8425871071	1	558		52	2012	2052	2092
oil/gas	United States	Americas	Northern America	McManus power station	4A			65.3	operating	1972		GT	FO					Georgia Power Co [100.0%]	Southern Co [100.0%]	31.2136	-81.5462	exact	Brunswick	Glynn		Georgia	https://www.gem.wiki/McManus_power_station	L100000409266	G100000414236	US8425871071	1	558		52	2012	2052	2092
oil/gas	United States	Americas	Northern America	McManus power station	4B			65.3	operating	1972		GT	FO					Georgia Power Co [100.0%]	Southern Co [100.0%]	31.2136	-81.5462	exact	Brunswick	Glynn		Georgia	https://www.gem.wiki/McManus_power_station	L100000409266	G100000414235	US8425871071	1	558		52	2012	2052	2092
oil/gas	United States	Americas	Northern America	McManus power station	4C			65.3	operating	1972		GT	FO					Georgia Power Co [100.0%]	Southern Co [100.0%]	31.2136	-81.5462	exact	Brunswick	Glynn		Georgia	https://www.gem.wiki/McManus_power_station	L100000409266	G100000414234	US8425871071	1	558		52	2012	2052	2092
oil/gas	United States	Americas	Northern America	McManus power station	4D			65.3	operating	1972		GT	FO					Georgia Power Co [100.0%]	Southern Co [100.0%]	31.2136	-81.5462	exact	Brunswick	Glynn		Georgia	https://www.gem.wiki/McManus_power_station	L100000409266	G100000414233	US8425871071	1	558		52	2012	2052	2092
oil/gas	United States	Americas	Northern America	McManus power station	4E			65.3	operating	1972		GT	FO					Georgia Power Co [100.0%]	Southern Co [100.0%]	31.2136	-81.5462	exact	Brunswick	Glynn		Georgia	https://www.gem.wiki/McManus_power_station	L100000409266	G100000414232	US8425871071	1	558		52	2012	2052	2092
oil/gas	United States	Americas	Northern America	McManus power station	4F			65.3	operating	1972		GT	FO					Georgia Power Co [100.0%]	Southern Co [100.0%]	31.2136	-81.5462	exact	Brunswick	Glynn		Georgia	https://www.gem.wiki/McManus_power_station	L100000409266	G100000414231	US8425871071	1	558	558	52	2012	2052	2092
oil/gas	United States	Americas	Northern America	Ratcliffe power plant	1			840	operating	2014		CC	NG					Mississippi Power Co [100.0%]	Southern Co [100.0%]	32.6547	-88.7622	exact	De Kalb	Kemper		Mississippi	https://www.gem.wiki/Ratcliffe_power_plant	L100000402096	G100000402041	US8425871071	1	840	840	10	2054	2094	2134
oil/gas	United States	Americas	Northern America	Robins power station	1			92	operating	1995		GT	NG/FO					Georgia Power Co [100.0%]	Southern Co [100.0%]	32.5792	-83.5822	exact	Robins AFB	Houston		Georgia	https://www.gem.wiki/Robins_power_station	L100000401980	G100000402953	US8425871071	1	184		29	2035	2075	2115
oil/gas	United States	Americas	Northern America	Robins power station	2			92	operating	1995		GT	NG/FO					Georgia Power Co [100.0%]	Southern Co [100.0%]	32.5792	-83.5822	exact	Robins AFB	Houston		Georgia	https://www.gem.wiki/Robins_power_station	L100000401980	G100000402954	US8425871071	1	184	184	29	2035	2075	2115
oil/gas	United States	Americas	Northern America	Rowan power station	1			199	operating	2001		GT	FO/NG					Southern Power Co [100.0%]	Southern Co [100.0%]	35.7314	-80.6019	exact	Salisbury	Rowan		North Carolina	https://www.gem.wiki/Rowan_power_station	L100000402288	G100000403536	US8425871071	1	1191		23	2041	2081	2121
oil/gas	United States	Americas	Northern America	Rowan power station	2			199	operating	2001		GT	FO/NG					Southern Power Co [100.0%]	Southern Co [100.0%]	35.7314	-80.6019	exact	Salisbury	Rowan		North Carolina	https://www.gem.wiki/Rowan_power_station	L100000402288	G100000403537	US8425871071	1	1191		23	2041	2081	2121
oil/gas	United States	Americas	Northern America	Rowan power station	3			199	operating	2001		GT	FO/NG					Southern Power Co [100.0%]	Southern Co [100.0%]	35.7314	-80.6019	exact	Salisbury	Rowan		North Carolina	https://www.gem.wiki/Rowan_power_station	L100000402288	G100000403538	US8425871071	1	1191		23	2041	2081	2121
oil/gas	United States	Americas	Northern America	Rowan power station	G102			594	operating	2003		CC	NG/FO					Southern Power Co [100.0%]	Southern Co [100.0%]	35.7314	-80.6019	exact	Salisbury	Rowan		North Carolina	https://www.gem.wiki/Rowan_power_station	L100000402288	G100000402174	US8425871071	1	1191	1191	21	2043	2083	2123
oil/gas	United States	Americas	Northern America	Tenaska Central Alabama generating station	STG1			927	operating	2003		CC	NG/FO					Alabama Power Co [100.0%]	Southern Co [100.0%]	32.6497	-86.74	exact	Billingsley	Autauga		Alabama	https://www.gem.wiki/Tenaska_Central_Alabama_generating_station	L100000401620	G100000401923	US8425871071	1	927	927	21	2043	2083	2123
oil/gas	United States	Americas	Northern America	Theodore cogeneration facility	G525			317	operating	2000		CC	NG					Alabama Power Co [100.0%]	Southern Co [100.0%]	30.5254	-88.1285	exact	Theodore	Mobile		Alabama	https://www.gem.wiki/Theodore_cogeneration_facility	L100000401698	G100000402168	US8425871071	1	317	317	24	2040	2080	2120
oil/gas	United States	Americas	Northern America	Victor J Daniel Jr power station	3		Plant Daniel	566	operating	2001		CC	NG					Mississippi Power Co [100.0%]	Southern Co [100.0%]	30.5322	-88.5553	exact	Escatawpa	Jackson		Mississippi	https://www.gem.wiki/Victor_J_Daniel_Jr_power_station	L100000402097	G100000402099	US8425871071	1	1132		23	2041	2081	2121
oil/gas	United States	Americas	Northern America	Victor J Daniel Jr power station	4		Plant Daniel	566	operating	2001		CC	NG					Mississippi Power Co [100.0%]	Southern Co [100.0%]	30.5322	-88.5553	exact	Escatawpa	Jackson		Mississippi	https://www.gem.wiki/Victor_J_Daniel_Jr_power_station	L100000402097	G100000402100	US8425871071	1	1132	1132	23	2041	2081	2121
oil/gas	United States	Americas	Northern America	Wansley Plant	G106			620	operating	2002		CC	NG					Southern Power Co [100.0%]	Southern Co [100.0%]	33.4064	-85.037	exact	Franklin	Heard		Georgia	https://www.gem.wiki/Wansley_Plant	L100000103848	G100000401986	US8425871071	1	3144		22	2042	2082	2122
oil/gas	United States	Americas	Northern America	Wansley Plant	G107			620	operating	2002		CC	NG					Southern Power Co [100.0%]	Southern Co [100.0%]	33.4064	-85.037	exact	Franklin	Heard		Georgia	https://www.gem.wiki/Wansley_Plant	L100000103848	G100000401987	US8425871071	1	3144	3144	22	2042	2082	2122
oil/gas	United States	Americas	Northern America	Wansley power station	5A			52.8	retired	1980	2022	GT	FO					Georgia Power Co [53.5%]; Oglethorpe Power Corp [30.0%]; Municipal Electric Authority of Georgia [15.1%]; Dalton Utilities [1.4%]	Southern Co [53.5%]; Municipal Electric Authority of Georgia [15.1%]	33.4134	-85.0323	exact	Roopville	Heard		Georgia	https://www.gem.wiki/Wansley_power_station	L100000409254	G100000414179	US8425871071	0.535	52.8	52.8	44	2020	2060	2100
oil/gas	United States	Americas	Northern America	Washington County cogeneration facility (AL)	G523			123	operating	1999		CC	NG					Alabama Power Co [100.0%]	Southern Co [100.0%]	31.2504	-88.0156	exact	McIntosh	Washington		Alabama	https://www.gem.wiki/Washington_County_cogeneration_facility_(AL)	L100000401699	G100000402162	US8425871071	1	123	123	25	2039	2079	2119
oil/gas	United States	Americas	Northern America	Wilson power station	5A			52.5	operating	1972		GT	FO					Georgia Power Co [100.0%]	Southern Co [100.0%]	33.1377	-81.7483	exact	Waynesboro	Burke		Georgia	https://www.gem.wiki/Wilson_Station	L100000409274	G100000414112	US8425871071	1	315		52	2012	2052	2092
oil/gas	United States	Americas	Northern America	Wilson power station	5B			52.5	operating	1972		GT	FO					Georgia Power Co [100.0%]	Southern Co [100.0%]	33.1377	-81.7483	exact	Waynesboro	Burke		Georgia	https://www.gem.wiki/Wilson_Station	L100000409274	G100000414111	US8425871071	1	315		52	2012	2052	2092
oil/gas	United States	Americas	Northern America	Wilson power station	5C			52.5	operating	1972		GT	FO					Georgia Power Co [100.0%]	Southern Co [100.0%]	33.1377	-81.7483	exact	Waynesboro	Burke		Georgia	https://www.gem.wiki/Wilson_Station	L100000409274	G100000414110	US8425871071	1	315		52	2012	2052	2092
oil/gas	United States	Americas	Northern America	Wilson power station	5D			52.5	operating	1973		GT	FO					Georgia Power Co [100.0%]	Southern Co [100.0%]	33.1377	-81.7483	exact	Waynesboro	Burke		Georgia	https://www.gem.wiki/Wilson_Station	L100000409274	G100000414109	US8425871071	1	315		51	2013	2053	2093
oil/gas	United States	Americas	Northern America	Wilson power station	5E			52.5	operating	1973		GT	FO					Georgia Power Co [100.0%]	Southern Co [100.0%]	33.1377	-81.7483	exact	Waynesboro	Burke		Georgia	https://www.gem.wiki/Wilson_Station	L100000409274	G100000414108	US8425871071	1	315		51	2013	2053	2093
oil/gas	United States	Americas	Northern America	Wilson power station	5F			52.5	operating	1973		GT	FO					Georgia Power Co [100.0%]	Southern Co [100.0%]	33.1377	-81.7483	exact	Waynesboro	Burke		Georgia	https://www.gem.wiki/Wilson_power_station	L100000409274	G100000414107	US8425871071	1	315	315	51	2013	2053	2093
oil/gas	United States	Americas	Northern America	Yates Steam Generating Plant	6			404	operating	2015		ST	NG					Georgia Power Co [100.0%]	Southern Co [100.0%]	33.4622	-84.8986	exact	Newnan	Coweta		Georgia	https://www.gem.wiki/Yates_Steam_Generating_Plant	L100000103850	G100000402955	US8425871071	1	2295.3		9	2055	2095	2135
oil/gas	United States	Americas	Northern America	Yates Steam Generating Plant	7			404	operating	2015		ST	NG					Georgia Power Co [100.0%]	Southern Co [100.0%]	33.4622	-84.8986	exact	Newnan	Coweta		Georgia	https://www.gem.wiki/Yates_Steam_Generating_Plant	L100000103850	G100000402956	US8425871071	1	2295.3	2295.3	9	2055	2095	2135
solar	United States	Americas	Northern America	Campo Verde Solar				147	operating	2013		PV						Southern Company; Turner Renewable Energy		32.7533	-115.726	exact		Imperial County		California	https://gem.wiki/Campo_Verde_Solar	L804482	G805153	US8425871071	0.5	147	147	11	2053	2093	2133
solar	United States	Americas	Northern America	Cimarron Solar Facility				31	operating	2010		PV						Southern Company; Turner Renewable Energy		36.4681	-104.636	exact		Colfax County		New Mexico	https://gem.wiki/Cimarron_Solar_Facility	L804483	G805154	US8425871071	0.5	31	31	14	2050	2090	2130
wind	China	Asia	Eastern Asia	Guizhou Tongzi Huanglianba wind farm		贵州桐梓黄莲坝风电场		50	operating	2020		onshore						China Power Construction New Energy Southern Co. [majority]; Beijing Tianrun New Energy Investment CO LTD		27.0001	107	approximate	Huanglian Xiang	Tongzi County	Zunyi Municipality	Guizhou	https://gem.wiki/Guizhou_Tongzi_Huanglianba_wind_farm	L903393	G904171	US8425871071	0.5	50	50	4	2060	2100	2140
wind	United States	Americas	Northern America	Ruso wind farm	1			205	shelved			onshore						Southern Company		48.3088	-101.515	approximate		Ward County		North Dakota	https://gem.wiki/Ruso_wind_farm	L907434	G910024	US8425871071	1	205	205	-99	40	80	120

## Sheet: Factors
Fuel Type	Capacity factor 2021	Capacity factor 2022	CF2020	CF2021	CF2022	CF2023		Southern Co - annual report 2021	https://s27.q4cdn.com/273397814/files/doc_financials/2021/ar/Southern-Company-2021-Annual-Report.pdf
Coal-hard	0.431093	0.517982	0.357393	0.504792	0.521917	0.514046		Southern Co - annual report 2022	https://s27.q4cdn.com/273397814/files/doc_financials/2023/ar/Southern-Company-2022-Annual-Report.pdf
Lignite	0	0	0	0	0	0
Oil	0.00566975	0.00606643	0.00586156	0.00547794	0.00812341	0.00400946
Gas	0.520335	0.487815	0.513173	0.527498	0.510918	0.464711
Fuel Type	Heat rate (Btu per kWh) 2022								a mix of 22% coal and 51% natural gas in 2022
Coal	10689							CDP C-EU8.2d 2021	over 11,500 MWs of renewable and storage facilities through ownership and long-term PPAs
Petroleum	11166							Energy Source Type	Nameplate capacity (MW)	Gross electricity generation (GWh)	Net electricity generation (GWh)	Absolute scope 1 emissions (metric tons CO2e)	Scope 1 emissions intensity (metric tons CO2e per GWh)		Capacity factor				https://www.southerncompany.com/content/dam/southerncompany/pdfs/about/governance/reports/net-zero-report_pdf1.pdf
Natural Gas	7740							Coal – hard	9754	43132	39646	40910287	1032		0.504792				https://www.southerncompany.com/sustainability/data-downloads-reports.html
Nuclear	10448							Lignite	0	0	0	0	0
								Oil	1813	87	82	39154	477		0.00547794
Fuel Type	Emission factors (kg of CO2 per TJ) US		Fuel Type	Emission factors (kg of CO2 per TJ) IPCC2006				Gas	19991	92376	90115	36031748	400		0.527498
Bituminous Coal	88374.7		Crude Oil	73300				Sustainable biomass	0	0	0	0	0
Distillate Oil	70271.4		Petroleum Coke	97500				Other biomass	10	40	40	37	1
Jet Fuel	68461		Coking Coal	94600				Waste (non-biomass)	0	0	0	0	0
Kerosene	69370.9		Other Bituminous Coal	94600				Nuclear	3680	31836	31124	0	0
Lignite Coal	93142.3		Sub-Bituminous Coal	96100				Fossil-fuel plants fitted with CCS	0	0	0	0	0
Municipal Solid Waste	47286.7		Lignite	101000				Geothermal	0	0	0	0	0
Natural Gas	50149.2		Coke	107000				Hydropower	2758	6950	6896	0	0		0.287665
Petroleum Coke	96791.4		Gas/Diesel Oil	74100				Wind	2528	8384	8384	0	0		0.378591
Propane Gas	59598.9		Residual Fuel Oil	77400				Solar	2955	6041	6041	0	0
Refined Coal	88374.7		Natural Gas	56100				Marine	0	0	0	0	0
Residual Fuel Oil	71171.8		Natural Gas Liquids	64200				Other renewable	17	140	140	47441	338
Subbituminous Coal	92061.8		Wood / Wood Waste	112000				Other non-renewable	0	0	0	0	0
Tire-Derived Fuel	81484.1		Charcoal	112000				Total	43506	188984	182469	77028667	422		0.495874
Waste Coal	88374.7		Industrial Wastes	143000
Waste Oil	70138.7		Waste Oils	73300				CDP C7.3a + Annual Report 2022
Fuel Type	Emission factors (kg of CO2 per MMBTU) US		Fuel Type	Emission factors (kg of CO2 per MMBTU) IPCC2006				Name	2022 Scope 1 GHG emissions (in million)	2021 Scope 1 GHG emissions (in million)	2020 Scope 1 GHG emissions (in million)
Bituminous Coal	93.24		Crude Oil	77.3354				Southern Co	85	82	75
Distillate Oil	74.14		Petroleum Coke	102.868				Alabama Power	35	34	28
Jet Fuel	72.23		Coking Coal	99.808				Georgia Power	23	23	21
Kerosene	73.19		Other Bituminous Coal	99.808				Mississippi Power	9	8	8
Lignite Coal	98.27		Sub-Bituminous Coal	101.391				Southern Power	13	11	12
Municipal Solid Waste	49.89		Lignite	106.56				Southern Company Gas	2	2	1
Natural Gas	52.91		Coke	112.891
Petroleum Coke	102.12		Gas/Diesel Oil	78.1794				CDP C-EU8.2d 2022	over 11,500 MWs of renewable and storage facilities through ownership and long-term PPAs
Propane Gas	62.88		Residual Fuel Oil	81.6611				Energy Source Type	Nameplate capacity (MW)	Gross electricity generation (GWh)	Net electricity generation (GWh)	Absolute scope 1 emissions (metric tons CO2e)	Scope 1 emissions intensity (metric tons CO2e per GWh)		Capacity factor
Refined Coal	93.24		Natural Gas	59.1885				Coal – hard	9306	42547	39284	40566279	1033		0.521917
Residual Fuel Oil	75.09		Natural Gas Liquids	67.7344				Lignite	0	0	0	0	0
Subbituminous Coal	97.13		Wood / Wood Waste	118.166				Oil	1869	133	129	80891	629		0.00812341
Tire-Derived Fuel	85.97		Charcoal	118.166				Gas	22048	98679	96762	38841725	401	33223	0.510918
Waste Coal	93.24		Industrial Wastes	150.873				Sustainable biomass	0	0	0	0	0
Waste Oil	74		Waste Oils	77.3354				Other biomass	10	40	40	37	1
								Waste (non-biomass)	0	0	0	0	0
								Nuclear	3680	30557	29200	0	0
								Fossil-fuel plants fitted with CCS	0	0	0	0	0
								Geothermal	0	0	0	0	0
								Hydropower	2215	6061	6036	0	0		0.312368
								Wind	2528	9092	9092	0	0		0.410562
								Solar	3183	6468	6468	0	0
								Marine	0	0	0	0	0
								Other renewable	17	127	127	40482	318
								Other non-renewable	0	0	0	0	0
								Total	44846	193665	187099	79529377	425		0.492973
								https://www.southerncompany.com/content/dam/southerncompany/sustainability/pdfs/2023-cdp-climate-change-disclosure.pdf
								CDP C-EU8.2d 2021
								Energy Source Type	Nameplate capacity (MW)	Gross electricity generation (GWh)	Net electricity generation (GWh)	Absolute scope 1 emissions (metric tons CO2e)	Scope 1 emissions intensity (metric tons CO2e per GWh)		Capacity factor
								Coal – hard	11109	33239	31585	32857105	1040		0.341561
								Lignite	0	0	0	0	0
								Oil	1867	101	95	50731	534		0.00617551
								Gas	20174	94056	92090	37387344	406	33150	0.532219
								Sustainable biomass	0	0	0	0	0
								Other biomass	10	40	40	37	1
								Waste (non-biomass)	0	0	0	0	0
								Nuclear	3680	31799	30387	0	0
								Fossil-fuel plants fitted with CCS	0	0	0	0	0
								Geothermal	27	225	225	47519	211
								Hydropower	2758	7874	7851	0	0		0.32591
								Wind	2110	7193	7193	0	0		0.389156
								Solar	2701	5876	5876	0	0
								Marine	0	0	0	0	0
								Other renewable	17	140	140	47441	338
								Other non-renewable	0	0	0	0	0
								Total	44426	180363	175302	70342699	401		0.463453
								https://www.southerncompany.com/content/dam/southerncompany/pdfs/about/governance/reports/CDP-Climate-Disclosure-2021.pdf
								IEA World Energy Outlook 2023: Coal (53.2%), Natural gas (39.6%), and Oil (19.1%).
								https://www.southerncompany.com/sustainability/data-downloads-reports.html
								MW	2023	2022	2021	2020
								Coal	8523	9306	9754	9754
								Gas	22590	22048	19991	19991
								Oil	1685	1869	1813	1813	32798	33223	31558
								MWh	2023	2022	2021	2020
								Coal	34696017	42546931	43131536	3.05375e+07
								Gas	101723753	98679080	92376078	89867500
								Oil	59182	133270	86826	93092.7	136479	141359	135594
								CF	2023	2022	2021	2020
								Coal	0.464711	0.521917	0.504787	0.357393
								Gas	0.514046	0.510919	0.527498	0.513173
								Oil	0.00400946	0.0081399	0.00546699	0.00586156
								Total capacity (MW)	45629	45667	43720	42548
								http://www.southerncompany.com/content/dam/southerncompany/sustainability/pdfs/Southern_Company_Data_Download.pdf

## Sheet: SouthernCo_BAU
Type	Country/area	Region	Subregion	Plant / Project name	Unit / Phase name	Plant / Project name (local)	Plant / Project name (other)	Capacity (MW)	Status	Start year	Retired year	Technology	Fuel	Country/area 1 (hydropower only)	Country/area 2 (hydropower only)	Country/area 1 Capacity (MW) (hydropower only)	Country/area 2 Capacity (MW) (hydropower only)	Owner	Parent	Latitude	Longitude	Location accuracy	City	Local area (taluk, county)	Major area (prefecture, district)	Subnational unit (state, province)	GEM.Wiki URL	GEM location ID	GEM unit/phase ID	CompISIN	Ownership	Plant capacity	Plant capacity	Age	Reinvestment year	Reinvestment year	Reinvestment year	2020	2021	2022	2023	2024	2025	2026	2027	2028	2029	2030	2031
coal	United States	Americas	Northern America	Barry Steam Plant	Unit 4			403.7	operating	1969	2028	subcritical	bituminous					Alabama Power [100%]	Southern Co [100.0%]	31.0066	-88.0088	exact	Bucks	Mobile		Alabama	https://www.gem.wiki/Barry_Steam_Plant	L100000103776	G100000100647	US8425871071	1	3692.5		55	2009	2049	2089	403.7	403.7	403.7	403.7	403.7	403.7	403.7	403.7	403.7	403.7	403.7	403.7
coal	United States	Americas	Northern America	Barry Steam Plant	Unit 5			788.8	operating	1971	2028	supercritical	bituminous					Alabama Power [100%]	Southern Co [100.0%]	31.0066	-88.0088	exact	Bucks	Mobile		Alabama	https://www.gem.wiki/Barry_Steam_Plant	L100000103776	G100000100648	US8425871071	1	3692.5	3692.5	53	2011	2051	2091	788.8	788.8	788.8	788.8	788.8	788.8	788.8	788.8	788.8	788.8	788.8	788.8
coal	United States	Americas	Northern America	Daniel Generating Plant	Unit 1		Victor J. Daniel Generating Plant	500	operating	1977	2024	subcritical	bituminous					Florida Power & Light [50%]; Mississippi Power [50%]	NextEra Energy Inc [50.0%]; Southern Co [50.0%]	30.5327	-88.5571	exact	Escatawpa	Jackson		Mississippi	https://www.gem.wiki/Daniel_Generating_Plant	L100000104008	G100000101965	US8425871071	0.5	1000		47	2017	2057	2097	250	250	250	250	250	250	250	250	250	250	250	250
coal	United States	Americas	Northern America	Daniel Generating Plant	Unit 2		Victor J. Daniel Generating Plant	500	operating	1981	2027	subcritical	bituminous					Florida Power & Light [50%]; Mississippi Power [50%]	NextEra Energy Inc [50.0%]; Southern Co [50.0%]	30.5327	-88.5571	exact	Escatawpa	Jackson		Mississippi	https://www.gem.wiki/Daniel_Generating_Plant	L100000104008	G100000101966	US8425871071	0.5	1000	1000	43	2021	2061	2101	250	250	250	250	250	250	250	250	250	250	250	250
coal	United States	Americas	Northern America	Gaston Steam Plant	Unit 5		EC Gaston power station	952	operating	1974	2028	supercritical	bituminous					Alabama Power [100%]	Southern Co [100.0%]	33.2432	-86.4589	exact	Wilsonville	Shelby		Alabama	https://www.gem.wiki/Gaston_Steam_Plant	L100000103780	G100000102959	US8425871071	1	2965	2965	50	2014	2054	2094	952	952	952	952	952	952	952	952	952	952	952	952
coal	United States	Americas	Northern America	Miller Steam Plant	Unit 1		James H. Miller Jr. Steam Plant	705.5	operating	1978		subcritical	subbituminous					Alabama Power [91%]; PowerSouth Energy Cooperative [8%]	Southern Co [91.8%]; PowerSouth Energy Cooperative [8.2%]	33.6332	-87.0598	exact	West Jefferson	Jefferson		Alabama	https://www.gem.wiki/Miller_Steam_Plant	L100000103783	G100000106922	US8425871071	0.918	2822		46	2018	2058	2098	647.649	647.649	647.649	647.649	647.649	647.649	647.649	647.649	647.649	647.649	647.649	647.649
coal	United States	Americas	Northern America	Miller Steam Plant	Unit 2		James H. Miller Jr. Steam Plant	705.5	operating	1985		subcritical	subbituminous					Alabama Power [91%]; PowerSouth Energy Cooperative [8%]	Southern Co [91.8%]; PowerSouth Energy Cooperative [8.2%]	33.6332	-87.0598	exact	West Jefferson	Jefferson		Alabama	https://www.gem.wiki/Miller_Steam_Plant	L100000103783	G100000106923	US8425871071	0.918	2822		39	2025	2065	2105	647.649	647.649	647.649	647.649	647.649	647.649	647.649	647.649	647.649	647.649	647.649	647.649
coal	United States	Americas	Northern America	Miller Steam Plant	Unit 3		James H. Miller Jr. Steam Plant	705.5	operating	1989		subcritical	subbituminous					Alabama Power [100%]	Southern Co [100.0%]	33.6332	-87.0598	exact	West Jefferson	Jefferson		Alabama	https://www.gem.wiki/Miller_Steam_Plant	L100000103783	G100000106924	US8425871071	1	2822		35	2029	2069	2109	705.5	705.5	705.5	705.5	705.5	705.5	705.5	705.5	705.5	705.5	705.5	705.5
coal	United States	Americas	Northern America	Miller Steam Plant	Unit 4		James H. Miller Jr. Steam Plant	705.5	operating	1991		subcritical	subbituminous					Alabama Power [100%]	Southern Co [100.0%]	33.6332	-87.0598	exact	West Jefferson	Jefferson		Alabama	https://www.gem.wiki/Miller_Steam_Plant	L100000103783	G100000106925	US8425871071	1	2822	2822	33	2031	2071	2111	705.5	705.5	705.5	705.5	705.5	705.5	705.5	705.5	705.5	705.5	705.5	705.5
coal	United States	Americas	Northern America	Plant Bowen	Unit 1			805.8	operating	1971	2028	supercritical	bituminous					Georgia Power [100%]	Southern Co [100.0%]	34.126	-84.9207	exact	Taylorsville	Bartow		Georgia	https://www.gem.wiki/Plant_Bowen	L100000103845	G100000108023	US8425871071	1	3498.6		53	2011	2051	2091	805.8	805.8	805.8	805.8	805.8	805.8	805.8	805.8	805.8	805.8	805.8	805.8
coal	United States	Americas	Northern America	Plant Bowen	Unit 2			788.8	operating	1972	2028	supercritical	bituminous					Georgia Power [100%]	Southern Co [100.0%]	34.126	-84.9207	exact	Taylorsville	Bartow		Georgia	https://www.gem.wiki/Plant_Bowen	L100000103845	G100000108024	US8425871071	1	3498.6		52	2012	2052	2092	788.8	788.8	788.8	788.8	788.8	788.8	788.8	788.8	788.8	788.8	788.8	788.8
coal	United States	Americas	Northern America	Plant Bowen	Unit 3			952	operating	1974	2035	supercritical	bituminous					Georgia Power [100%]	Southern Co [100.0%]	34.126	-84.9207	exact	Taylorsville	Bartow		Georgia	https://www.gem.wiki/Plant_Bowen	L100000103845	G100000108025	US8425871071	1	3498.6		50	2014	2054	2094	952	952	952	952	952	952	952	952	952	952	952	952
coal	United States	Americas	Northern America	Plant Bowen	Unit 4			952	operating	1975	2035	supercritical	bituminous					Georgia Power [100%]	Southern Co [100.0%]	34.126	-84.9207	exact	Taylorsville	Bartow		Georgia	https://www.gem.wiki/Plant_Bowen	L100000103845	G100000108026	US8425871071	1	3498.6	3498.6	49	2015	2055	2095	952	952	952	952	952	952	952	952	952	952	952	952
coal	United States	Americas	Northern America	Red Hills Generation Facility	Unit 1			513.7	operating	2001		subcritical	lignite					S E Choctaw [100%]	Southern Co [100.0%]	33.3762	-89.2185	exact	Red Hills	Choctaw		Mississippi	https://www.gem.wiki/Red_Hills_Generation_Facility	L100000104012	G100000108505	US8425871071	1	513.7	513.7	23	2041	2081	2121	513.7	513.7	513.7	513.7	513.7	513.7	513.7	513.7	513.7	513.7	513.7	513.7
coal	United States	Americas	Northern America	Scherer Steam Generating Station	Unit 1			891	operating	1982		subcritical	subbituminous					other unknown/mixed entity types [1%]; Oglethorpe Power [60%]; Municipal Electric Authority of Georgia [30%]; Georgia Power [8%]	Oglethorpe Power [60.0%]; Municipal Electric Authority of Georgia [30.2%]; Southern Co [8.4%]; other unknown/mixed entity types [1.4%]	33.0603	-83.8069	exact	Juliette	Monroe		Georgia	https://www.gem.wiki/Scherer_Steam_Generating_Station	L100000103847	G100000108869	US8425871071	0.084	2673		42	2022	2062	2102	74.844	74.844	74.844	74.844	74.844	74.844	74.844	74.844	74.844	74.844	74.844	74.844
coal	United States	Americas	Northern America	Scherer Steam Generating Station	Unit 2			891	operating	1984		subcritical	subbituminous					Municipal Electric Authority of Georgia [30%]; Oglethorpe Power [60%]; Georgia Power [8%]; other unknown/mixed entity types [1%]	Oglethorpe Power [60.0%]; Municipal Electric Authority of Georgia [30.2%]; Southern Co [8.4%]; other unknown/mixed entity types [1.4%]	33.0603	-83.8069	exact	Juliette	Monroe		Georgia	https://www.gem.wiki/Scherer_Steam_Generating_Station	L100000103847	G100000108870	US8425871071	0.084	2673		40	2024	2064	2104	74.844	74.844	74.844	74.844	74.844	74.844	74.844	74.844	74.844	74.844	74.844	74.844
coal	United States	Americas	Northern America	Scherer Steam Generating Station	Unit 3			891	operating	1987	2028	subcritical	subbituminous					Florida Power & Light [25%]; Georgia Power [75%]	Southern Co [75.0%]; NextEra Energy Inc [25.0%]	33.0603	-83.8069	exact	Juliette	Monroe		Georgia	https://www.gem.wiki/Scherer_Steam_Generating_Station	L100000103847	G100000108871	US8425871071	0.75	2673	2673	37	2027	2067	2107	668.25	668.25	668.25	668.25	668.25	668.25	668.25	668.25	668.25	668.25	668.25	668.25
coal	United States	Americas	Northern America	Wansley Plant	Unit 1			952	retired	1976	2022	supercritical	bituminous					Oglethorpe Power [30%]; Municipal Electric Authority of Georgia [15%]; Georgia Power [53%]; other unknown/mixed entity types [1%]	Southern Co [53.5%]; Oglethorpe Power [30.0%]; Municipal Electric Authority of Georgia [15.1%]; other unknown/mixed entity types [1.4%]	33.4127	-85.0339	exact	Roopville	Heard		Georgia	https://www.gem.wiki/Wansley_Plant	L100000103848	G100000110728	US8425871071	0.535	3144		48	2016	2056	2096	509.32	509.32	0	0	0	0	0	0	0	0	0	0
coal	United States	Americas	Northern America	Wansley Plant	Unit 2			952	retired	1978	2022	supercritical	bituminous					Oglethorpe Power [30%]; Municipal Electric Authority of Georgia [15%]; Georgia Power [53%]; other unknown/mixed entity types [1%]	Southern Co [53.5%]; Oglethorpe Power [30.0%]; Municipal Electric Authority of Georgia [15.1%]; other unknown/mixed entity types [1.4%]	33.4127	-85.0339	exact	Roopville	Heard		Georgia	https://www.gem.wiki/Wansley_Plant	L100000103848	G100000110729	US8425871071	0.535	3144	3144	46	2018	2058	2098	509.32	509.32	0	0	0	0	0	0	0	0	0	0
oil/gas	United States	Americas	Northern America	Barry Steam Plant	G521		James M. Barry Electric Generating Plant	535	operating	2000		CC	NG					Alabama Power Co [100.0%]	Southern Co [100.0%]	31.0069	-88.0103	exact	Bucks	Mobile		Alabama	https://www.gem.wiki/Barry_Steam_Plant	L100000103776	G100000401686	US8425871071	1	3692.5		24	2040	2080	2120	535	535	535	535	535	535	535	535	535	535	535	535
oil/gas	United States	Americas	Northern America	Barry Steam Plant	G522		James M. Barry Electric Generating Plant	535	operating	2000		CC	NG					Alabama Power Co [100.0%]	Southern Co [100.0%]	31.0069	-88.0103	exact	Bucks	Mobile		Alabama	https://www.gem.wiki/Barry_Steam_Plant	L100000103776	G100000401687	US8425871071	1	3692.5		24	2040	2080	2120	535	535	535	535	535	535	535	535	535	535	535	535
oil/gas	United States	Americas	Northern America	Barry Steam Plant	1		James M. Barry Electric Generating Plant	153	operating	2015		ST	NG					Alabama Power Co [100.0%]	Southern Co [100.0%]	31.0069	-88.0103	exact	Bucks	Mobile		Alabama	https://www.gem.wiki/Barry_Steam_Plant	L100000103776	G100000402400	US8425871071	1	3692.5		9	2055	2095	2135	153	153	153	153	153	153	153	153	153	153	153	153
oil/gas	United States	Americas	Northern America	Barry Steam Plant	2		James M. Barry Electric Generating Plant	153	operating	2015		ST	NG					Alabama Power Co [100.0%]	Southern Co [100.0%]	31.0069	-88.0103	exact	Bucks	Mobile		Alabama	https://www.gem.wiki/Barry_Steam_Plant	L100000103776	G100000402401	US8425871071	1	3692.5		9	2055	2095	2135	153	153	153	153	153	153	153	153	153	153	153	153
oil/gas	United States	Americas	Northern America	Barry Steam Plant	G523		James M. Barry Electric Generating Plant	774	operating	2023		CC	NG					Alabama Power Co [100.0%]	Southern Co [100.0%]	31.0069	-88.0103	exact	Bucks	Mobile		Alabama	https://www.gem.wiki/Barry_Steam_Plant	L100000103776	G100000409443	US8425871071	1	3692.5		1	2063	2103	2143	0	0	0	774	774	774	774	774	774	774	774	774
oil/gas	United States	Americas	Northern America	Barry Steam Plant	4		James M. Barry Electric Generating Plant	350	pre-construction	2028		ST	NG					Alabama Power Co [100.0%]	Southern Co [100.0%]	31.0069	-88.0103	exact	Bucks	Mobile		Alabama	https://www.gem.wiki/Barry_Steam_Plant	L100000103776	G100000410538	US8425871071	1	3692.5	3692.5	-4	2068	2108	2148	0	0	0	0	0	0	0	0	350	350	350	350
oil/gas	United States	Americas	Northern America	Chevron Oil power station	5			101	operating	1994		GT	NG					Mississippi Power Co [100.0%]	Southern Co [100.0%]	30.34	-88.4919	exact	Pascagoula	Jackson		Mississippi	https://www.gem.wiki/Chevron_Oil_power_station	L100000402094	G100000403187	US8425871071	1	101	101	30	2034	2074	2114	101	101	101	101	101	101	101	101	101	101	101	101
oil/gas	United States	Americas	Northern America	Cleveland County generating facility	1			184	operating	2012		GT	NG/FO					Southern Power Co [100.0%]	Southern Co [100.0%]	35.1705	-81.4167	exact	Kings Mountain	Cleveland		North Carolina	https://www.gem.wiki/Cleveland_County_generating_facility	L100000402282	G100000403518	US8425871071	1	736		12	2052	2092	2132	184	184	184	184	184	184	184	184	184	184	184	184
oil/gas	United States	Americas	Northern America	Cleveland County generating facility	2			184	operating	2012		GT	NG/FO					Southern Power Co [100.0%]	Southern Co [100.0%]	35.1705	-81.4167	exact	Kings Mountain	Cleveland		North Carolina	https://www.gem.wiki/Cleveland_County_generating_facility	L100000402282	G100000403519	US8425871071	1	736		12	2052	2092	2132	184	184	184	184	184	184	184	184	184	184	184	184
oil/gas	United States	Americas	Northern America	Cleveland County generating facility	3			184	operating	2012		GT	NG/FO					Southern Power Co [100.0%]	Southern Co [100.0%]	35.1705	-81.4167	exact	Kings Mountain	Cleveland		North Carolina	https://www.gem.wiki/Cleveland_County_generating_facility	L100000402282	G100000403520	US8425871071	1	736		12	2052	2092	2132	184	184	184	184	184	184	184	184	184	184	184	184
oil/gas	United States	Americas	Northern America	Cleveland County generating facility	4			184	operating	2012		GT	NG/FO					Southern Power Co [100.0%]	Southern Co [100.0%]	35.1705	-81.4167	exact	Kings Mountain	Cleveland		North Carolina	https://www.gem.wiki/Cleveland_County_generating_facility	L100000402282	G100000403521	US8425871071	1	736	736	12	2052	2092	2132	184	184	184	184	184	184	184	184	184	184	184	184
oil/gas	United States	Americas	Northern America	Dahlberg power station	1			92	operating	2000		GT	NG/FO					Southern Power Co [100.0%]	Southern Co [100.0%]	34.0423	-83.3977	exact	Nicholson	Jackson		Georgia	https://www.gem.wiki/Dahlberg_power_station	L100000402283	G100000403522	US8425871071	1	920		24	2040	2080	2120	92	92	92	92	92	92	92	92	92	92	92	92
oil/gas	United States	Americas	Northern America	Dahlberg power station	2			92	operating	2000		GT	NG/FO					Southern Power Co [100.0%]	Southern Co [100.0%]	34.0423	-83.3977	exact	Nicholson	Jackson		Georgia	https://www.gem.wiki/Dahlberg_power_station	L100000402283	G100000403524	US8425871071	1	920		24	2040	2080	2120	92	92	92	92	92	92	92	92	92	92	92	92
oil/gas	United States	Americas	Northern America	Dahlberg power station	3			92	operating	2000		GT	NG/FO					Southern Power Co [100.0%]	Southern Co [100.0%]	34.0423	-83.3977	exact	Nicholson	Jackson		Georgia	https://www.gem.wiki/Dahlberg_power_station	L100000402283	G100000403525	US8425871071	1	920		24	2040	2080	2120	92	92	92	92	92	92	92	92	92	92	92	92
oil/gas	United States	Americas	Northern America	Dahlberg power station	4			92	operating	2000		GT	NG/FO					Southern Power Co [100.0%]	Southern Co [100.0%]	34.0423	-83.3977	exact	Nicholson	Jackson		Georgia	https://www.gem.wiki/Dahlberg_power_station	L100000402283	G100000403526	US8425871071	1	920		24	2040	2080	2120	92	92	92	92	92	92	92	92	92	92	92	92
oil/gas	United States	Americas	Northern America	Dahlberg power station	5			92	operating	2000		GT	NG/FO					Southern Power Co [100.0%]	Southern Co [100.0%]	34.0423	-83.3977	exact	Nicholson	Jackson		Georgia	https://www.gem.wiki/Dahlberg_power_station	L100000402283	G100000403527	US8425871071	1	920		24	2040	2080	2120	92	92	92	92	92	92	92	92	92	92	92	92
oil/gas	United States	Americas	Northern America	Dahlberg power station	6			92	operating	2000		GT	NG/FO					Southern Power Co [100.0%]	Southern Co [100.0%]	34.0423	-83.3977	exact	Nicholson	Jackson		Georgia	https://www.gem.wiki/Dahlberg_power_station	L100000402283	G100000403528	US8425871071	1	920		24	2040	2080	2120	92	92	92	92	92	92	92	92	92	92	92	92
oil/gas	United States	Americas	Northern America	Dahlberg power station	7			92	operating	2000		GT	NG/FO					Southern Power Co [100.0%]	Southern Co [100.0%]	34.0423	-83.3977	exact	Nicholson	Jackson		Georgia	https://www.gem.wiki/Dahlberg_power_station	L100000402283	G100000403529	US8425871071	1	920		24	2040	2080	2120	92	92	92	92	92	92	92	92	92	92	92	92
oil/gas	United States	Americas	Northern America	Dahlberg power station	8			92	operating	2000		GT	NG/FO					Southern Power Co [100.0%]	Southern Co [100.0%]	34.0423	-83.3977	exact	Nicholson	Jackson		Georgia	https://www.gem.wiki/Dahlberg_power_station	L100000402283	G100000403530	US8425871071	1	920		24	2040	2080	2120	92	92	92	92	92	92	92	92	92	92	92	92
oil/gas	United States	Americas	Northern America	Dahlberg power station	9			92	operating	2001		GT	NG/FO					Southern Power Co [100.0%]	Southern Co [100.0%]	34.0423	-83.3977	exact	Nicholson	Jackson		Georgia	https://www.gem.wiki/Dahlberg_power_station	L100000402283	G100000403531	US8425871071	1	920		23	2041	2081	2121	92	92	92	92	92	92	92	92	92	92	92	92
oil/gas	United States	Americas	Northern America	Dahlberg power station	10			92	operating	2001		GT	NG/FO					Southern Power Co [100.0%]	Southern Co [100.0%]	34.0423	-83.3977	exact	Nicholson	Jackson		Georgia	https://www.gem.wiki/Dahlberg_power_station	L100000402283	G100000403523	US8425871071	1	920	920	23	2041	2081	2121	92	92	92	92	92	92	92	92	92	92	92	92
oil/gas	United States	Americas	Northern America	E B Harris Electric generating plant	G103			652	operating	2003		CC	NG					Southern Power Co [100.0%]	Southern Co [100.0%]	32.3814	-86.5744	exact	Autaugaville	Autauga		Alabama	https://www.gem.wiki/E_B_Harris_Electric_generating_plant	L100000402284	G100000402182	US8425871071	1	1304		21	2043	2083	2123	652	652	652	652	652	652	652	652	652	652	652	652
oil/gas	United States	Americas	Northern America	E B Harris Electric generating plant	G104			652	operating	2003		CC	NG					Southern Power Co [100.0%]	Southern Co [100.0%]	32.3814	-86.5744	exact	Autaugaville	Autauga		Alabama	https://www.gem.wiki/E_B_Harris_Electric_generating_plant	L100000402284	G100000402183	US8425871071	1	1304	1304	21	2043	2083	2123	652	652	652	652	652	652	652	652	652	652	652	652
oil/gas	United States	Americas	Northern America	Edward L. Addison generating plant	712			175	operating	2000		GT	NG/FO					Southern Power Co [100.0%]	Southern Co [100.0%]	32.9111	-84.3064	exact	Thomaston	Upson		Georgia	https://www.gem.wiki/Edward_L._Addison_generating_plant	L100000402285	G100000403532	US8425871071	1	700		24	2040	2080	2120	175	175	175	175	175	175	175	175	175	175	175	175
oil/gas	United States	Americas	Northern America	Edward L. Addison generating plant	713			175	operating	2000		GT	NG/FO					Southern Power Co [100.0%]	Southern Co [100.0%]	32.9111	-84.3064	exact	Thomaston	Upson		Georgia	https://www.gem.wiki/Edward_L._Addison_generating_plant	L100000402285	G100000403533	US8425871071	1	700		24	2040	2080	2120	175	175	175	175	175	175	175	175	175	175	175	175
oil/gas	United States	Americas	Northern America	Edward L. Addison generating plant	714			175	operating	2000		GT	NG/FO					Southern Power Co [100.0%]	Southern Co [100.0%]	32.9111	-84.3064	exact	Thomaston	Upson		Georgia	https://www.gem.wiki/Edward_L._Addison_generating_plant	L100000402285	G100000403534	US8425871071	1	700		24	2040	2080	2120	175	175	175	175	175	175	175	175	175	175	175	175
oil/gas	United States	Americas	Northern America	Edward L. Addison generating plant	715			175	operating	2000		GT	NG/FO					Southern Power Co [100.0%]	Southern Co [100.0%]	32.9111	-84.3064	exact	Thomaston	Upson		Georgia	https://www.gem.wiki/Edward_L._Addison_generating_plant	L100000402285	G100000403535	US8425871071	1	700	700	24	2040	2080	2120	175	175	175	175	175	175	175	175	175	175	175	175
oil/gas	United States	Americas	Northern America	Gadsden Steam Plant	1			69	retired	2015	2023	ST	NG					Alabama Power Co [100.0%]	Southern Co [100.0%]	34.0128	-85.9708	exact	Gadsden	Etowah		Alabama	https://www.gem.wiki/Gadsden_Steam_Plant	L100000103779	G100000402402	US8425871071	1	138		9	2055	2095	2135	69	69	69	0	0	0	0	0	0	0	0	0
oil/gas	United States	Americas	Northern America	Gadsden Steam Plant	2			69	retired	2015	2023	ST	NG					Alabama Power Co [100.0%]	Southern Co [100.0%]	34.0128	-85.9708	exact	Gadsden	Etowah		Alabama	https://www.gem.wiki/Gadsden_Steam_Plant	L100000103779	G100000402403	US8425871071	1	138	138	9	2055	2095	2135	69	69	69	0	0	0	0	0	0	0	0	0
oil/gas	United States	Americas	Northern America	Gaston Steam Plant	1		E.C. Gaston Steam Plant	272	operating	2015	2028	ST	NG/C					Alabama Power Co [50.0%]; Georgia Power Co [50.0%]	Southern Co [50.0%]; Southern Co [50.0%]	33.2442	-86.4581	exact	Wilsonville	Shelby		Alabama	https://www.gem.wiki/Gaston_Steam_Plant	L100000103780	G100000402200	US8425871071	0.5	2965		9	2055	2095	2135	136	136	136	136	136	136	136	136	136	136	136	136
oil/gas	United States	Americas	Northern America	Gaston Steam Plant	2		E.C. Gaston Steam Plant	272	operating	2015	2028	ST	NG/C					Alabama Power Co [50.0%]; Georgia Power Co [50.0%]	Southern Co [50.0%]; Southern Co [50.0%]	33.2442	-86.4581	exact	Wilsonville	Shelby		Alabama	https://www.gem.wiki/Gaston_Steam_Plant	L100000103780	G100000402201	US8425871071	0.5	2965		9	2055	2095	2135	136	136	136	136	136	136	136	136	136	136	136	136
oil/gas	United States	Americas	Northern America	Gaston Steam Plant	3		E.C. Gaston Steam Plant	272	operating	2015	2028	ST	NG/C					Alabama Power Co [50.0%]; Georgia Power Co [50.0%]	Southern Co [50.0%]; Southern Co [50.0%]	33.2442	-86.4581	exact	Wilsonville	Shelby		Alabama	https://www.gem.wiki/Gaston_Steam_Plant	L100000103780	G100000402202	US8425871071	0.5	2965		9	2055	2095	2135	136	136	136	136	136	136	136	136	136	136	136	136
oil/gas	United States	Americas	Northern America	Gaston Steam Plant	ST4		E.C. Gaston Steam Plant	245	operating	2015	2028	ST	NG/C					Alabama Power Co [50.0%]; Georgia Power Co [50.0%]	Southern Co [50.0%]; Southern Co [50.0%]	33.2442	-86.4581	exact	Wilsonville	Shelby		Alabama	https://www.gem.wiki/Gaston_Steam_Plant	L100000103780	G100000402203	US8425871071	0.5	2965		9	2055	2095	2135	122.5	122.5	122.5	122.5	122.5	122.5	122.5	122.5	122.5	122.5	122.5	122.5
oil/gas	United States	Americas	Northern America	Gaston Steam Plant	5		E.C. Gaston Steam Plant	952	announced	2028		ST	NG					Alabama Power Co [50.0%]; Georgia Power Co [50.0%]	Southern Co [50.0%]; Southern Co [50.0%]	33.2442	-86.4581	exact	Wilsonville	Shelby		Alabama	https://www.gem.wiki/Gaston_Steam_Plant	L100000103780	G100000410528	US8425871071	0.5	2965	2965	-4	2068	2108	2148	0	0	0	0	0	0	0	0	476	476	476	476
oil/gas	United States	Americas	Northern America	General Electric Plastic power station	G524			97	operating	1999		CC	NG					Alabama Power Co [100.0%]	Southern Co [100.0%]	32.3102	-86.5254	exact	Burkeville	Lowndes		Alabama	https://www.gem.wiki/General_Electric_Plastic_power_station	L100000401697	G100000402163	US8425871071	1	97	97	25	2039	2079	2119	97	97	97	97	97	97	97	97	97	97	97	97
oil/gas	United States	Americas	Northern America	Greene County Steam Plant	GT3			80	operating	1995		GT	FO/NG					Alabama Power Co [100.0%]	Southern Co [100.0%]	32.6017	-87.7811	exact	Demopolis	Greene		Alabama	https://www.gem.wiki/Greene_County_Steam_Plant	L100000103782	G100000402406	US8425871071	1	1288		29	2035	2075	2115	80	80	80	80	80	80	80	80	80	80	80	80
oil/gas	United States	Americas	Northern America	Greene County Steam Plant	GT4			80	operating	1995		GT	FO/NG					Alabama Power Co [100.0%]	Southern Co [100.0%]	32.6017	-87.7811	exact	Demopolis	Greene		Alabama	https://www.gem.wiki/Greene_County_Steam_Plant	L100000103782	G100000402407	US8425871071	1	1288		29	2035	2075	2115	80	80	80	80	80	80	80	80	80	80	80	80
oil/gas	United States	Americas	Northern America	Greene County Steam Plant	GT5			80	operating	1995		GT	FO/NG					Alabama Power Co [100.0%]	Southern Co [100.0%]	32.6017	-87.7811	exact	Demopolis	Greene		Alabama	https://www.gem.wiki/Greene_County_Steam_Plant	L100000103782	G100000402408	US8425871071	1	1288		29	2035	2075	2115	80	80	80	80	80	80	80	80	80	80	80	80
oil/gas	United States	Americas	Northern America	Greene County Steam Plant	GT6			80	operating	1995		GT	FO/NG					Alabama Power Co [100.0%]	Southern Co [100.0%]	32.6017	-87.7811	exact	Demopolis	Greene		Alabama	https://www.gem.wiki/Greene_County_Steam_Plant	L100000103782	G100000402409	US8425871071	1	1288		29	2035	2075	2115	80	80	80	80	80	80	80	80	80	80	80	80
oil/gas	United States	Americas	Northern America	Greene County Steam Plant	GT7			80	operating	1995		GT	FO/NG					Alabama Power Co [100.0%]	Southern Co [100.0%]	32.6017	-87.7811	exact	Demopolis	Greene		Alabama	https://www.gem.wiki/Greene_County_Steam_Plant	L100000103782	G100000402410	US8425871071	1	1288		29	2035	2075	2115	80	80	80	80	80	80	80	80	80	80	80	80
oil/gas	United States	Americas	Northern America	Greene County Steam Plant	GT10			80	operating	1996		GT	FO/NG					Alabama Power Co [100.0%]	Southern Co [100.0%]	32.6017	-87.7811	exact	Demopolis	Greene		Alabama	https://www.gem.wiki/Greene_County_Steam_Plant	L100000103782	G100000402404	US8425871071	1	1288		28	2036	2076	2116	80	80	80	80	80	80	80	80	80	80	80	80
oil/gas	United States	Americas	Northern America	Greene County Steam Plant	GT2			80	operating	1996		GT	FO/NG					Alabama Power Co [100.0%]	Southern Co [100.0%]	32.6017	-87.7811	exact	Demopolis	Greene		Alabama	https://www.gem.wiki/Greene_County_Steam_Plant	L100000103782	G100000402405	US8425871071	1	1288		28	2036	2076	2116	80	80	80	80	80	80	80	80	80	80	80	80
oil/gas	United States	Americas	Northern America	Greene County Steam Plant	GT8			80	operating	1996		GT	FO/NG					Alabama Power Co [100.0%]	Southern Co [100.0%]	32.6017	-87.7811	exact	Demopolis	Greene		Alabama	https://www.gem.wiki/Greene_County_Steam_Plant	L100000103782	G100000402411	US8425871071	1	1288		28	2036	2076	2116	80	80	80	80	80	80	80	80	80	80	80	80
oil/gas	United States	Americas	Northern America	Greene County Steam Plant	GT9			80	operating	1996		GT	FO/NG					Alabama Power Co [100.0%]	Southern Co [100.0%]	32.6017	-87.7811	exact	Demopolis	Greene		Alabama	https://www.gem.wiki/Greene_County_Steam_Plant	L100000103782	G100000402412	US8425871071	1	1288		28	2036	2076	2116	80	80	80	80	80	80	80	80	80	80	80	80
oil/gas	United States	Americas	Northern America	Greene County Steam Plant	1			299	operating	2016		ST	NG					Alabama Power Co [60.0%]; Mississippi Power Co [40.0%]	Southern Co [60.0%]; Southern Co [40.0%]	32.6017	-87.7811	exact	Demopolis	Greene		Alabama	https://www.gem.wiki/Greene_County_Steam_Plant	L100000103782	G100000402204	US8425871071	0.6	1288		8	2056	2096	2136	179.4	179.4	179.4	179.4	179.4	179.4	179.4	179.4	179.4	179.4	179.4	179.4
oil/gas	United States	Americas	Northern America	Greene County Steam Plant	2			269	operating	2016		ST	NG					Alabama Power Co [60.0%]; Mississippi Power Co [40.0%]	Southern Co [60.0%]; Southern Co [40.0%]	32.6017	-87.7811	exact	Demopolis	Greene		Alabama	https://www.gem.wiki/Greene_County_Steam_Plant	L100000103782	G100000402205	US8425871071	0.6	1288	1288	8	2056	2096	2136	161.4	161.4	161.4	161.4	161.4	161.4	161.4	161.4	161.4	161.4	161.4	161.4
oil/gas	United States	Americas	Northern America	H Allen Franklin Combined Cycle power station	G481			620	operating	2002		CC	NG					Southern Power Co [100.0%]	Southern Co [100.0%]	32.6078	-85.0975	exact	Smiths	Lee		Alabama	https://www.gem.wiki/H_Allen_Franklin_Combined_Cycle_power_station	L100000402286	G100000402166	US8425871071	1	1996		22	2042	2082	2122	620	620	620	620	620	620	620	620	620	620	620	620
oil/gas	United States	Americas	Northern America	H Allen Franklin Combined Cycle power station	G501			688	operating	2002		CC	NG					Southern Power Co [100.0%]	Southern Co [100.0%]	32.6078	-85.0975	exact	Smiths	Lee		Alabama	https://www.gem.wiki/H_Allen_Franklin_Combined_Cycle_power_station	L100000402286	G100000402167	US8425871071	1	1996		22	2042	2082	2122	688	688	688	688	688	688	688	688	688	688	688	688
oil/gas	United States	Americas	Northern America	H Allen Franklin Combined Cycle power station	G100			688	operating	2008		CC	NG					Southern Power Co [100.0%]	Southern Co [100.0%]	32.6078	-85.0975	exact	Smiths	Lee		Alabama	https://www.gem.wiki/H_Allen_Franklin_Combined_Cycle_power_station	L100000402286	G100000402165	US8425871071	1	1996	1996	16	2048	2088	2128	688	688	688	688	688	688	688	688	688	688	688	688
oil/gas	United States	Americas	Northern America	Intercession City power station	P11			148.5	operating	1997		GT	FO					Duke Energy Florida LLC [66.7%]; Georgia Power Co [33.3%]	Duke Energy Corp [66.7%]; Southern Co [33.3%]	28.2628	-81.5486	exact	Intercession City	Osceola		Florida	https://www.gem.wiki/Intercession_City_power_station	L100000401869	G100000414252	US8425871071	0.333	148.5	148.5	27	2037	2077	2117	49.4505	49.4505	49.4505	49.4505	49.4505	49.4505	49.4505	49.4505	49.4505	49.4505	49.4505	49.4505
oil/gas	United States	Americas	Northern America	Jack Watson Generating Plant	4			299	operating	2015	2023	ST	NG					Mississippi Power Co [100.0%]	Southern Co [100.0%]	30.4392	-89.0286	exact	Gulfport	Harrison		Mississippi	https://www.gem.wiki/Jack_Watson_Generating_Plant	L100000104009	G100000403188	US8425871071	1	877		9	2055	2095	2135	299	299	299	299	299	299	299	299	299	299	299	299
oil/gas	United States	Americas	Northern America	Jack Watson Generating Plant	5			578	operating	2015		ST	NG					Mississippi Power Co [100.0%]	Southern Co [100.0%]	30.4392	-89.0286	exact	Gulfport	Harrison		Mississippi	https://www.gem.wiki/Jack_Watson_Generating_Plant	L100000104009	G100000403189	US8425871071	1	877	877	9	2055	2095	2135	578	578	578	578	578	578	578	578	578	578	578	578
oil/gas	United States	Americas	Northern America	McDonough Steam Generating Plant	G104		Atkinson power station/Jack McDonough Steam Generating Plant	922	operating	2011		CC	NG/FO					Georgia Power Co [100.0%]	Southern Co [100.0%]	33.8239	-84.4758	exact	Smyrna	Cobb		Georgia	https://www.gem.wiki/McDonough_Steam_Generating_Plant	L100000103842	G100000402137	US8425871071	1	2766		13	2051	2091	2131	922	922	922	922	922	922	922	922	922	922	922	922
oil/gas	United States	Americas	Northern America	McDonough Steam Generating Plant	G105		Atkinson power station/Jack McDonough Steam Generating Plant	922	operating	2012		CC	NG/FO					Georgia Power Co [100.0%]	Southern Co [100.0%]	33.8239	-84.4758	exact	Smyrna	Cobb		Georgia	https://www.gem.wiki/McDonough_Steam_Generating_Plant	L100000103842	G100000402138	US8425871071	1	2766		12	2052	2092	2132	922	922	922	922	922	922	922	922	922	922	922	922
oil/gas	United States	Americas	Northern America	McDonough Steam Generating Plant	G106		Atkinson power station/Jack McDonough Steam Generating Plant	922	operating	2012		CC	NG/FO					Georgia Power Co [100.0%]	Southern Co [100.0%]	33.8239	-84.4758	exact	Smyrna	Cobb		Georgia	https://www.gem.wiki/McDonough_Steam_Generating_Plant	L100000103842	G100000402139	US8425871071	1	2766	2766	12	2052	2092	2132	922	922	922	922	922	922	922	922	922	922	922	922
oil/gas	United States	Americas	Northern America	McIntosh Combined Cycle Facility	G110			688	operating	2005		CC	NG					Georgia Power Co [100.0%]	Southern Co [100.0%]	32.3478	-81.1817	exact	Rincon	Effingham		Georgia	https://www.gem.wiki/McIntosh_Combined_Cycle_Facility	L100000401979	G100000402001	US8425871071	1	1376		19	2045	2085	2125	688	688	688	688	688	688	688	688	688	688	688	688
oil/gas	United States	Americas	Northern America	McIntosh Combined Cycle Facility	G111			688	operating	2005		CC	NG					Georgia Power Co [100.0%]	Southern Co [100.0%]	32.3478	-81.1817	exact	Rincon	Effingham		Georgia	https://www.gem.wiki/McIntosh_Combined_Cycle_Facility	L100000401979	G100000402002	US8425871071	1	1376	1376	19	2045	2085	2125	688	688	688	688	688	688	688	688	688	688	688	688
oil/gas	United States	Americas	Northern America	McIntosh Steam Plant	CT3			101	operating	1994		GT	NG/FO					Georgia Power Co [100.0%]	Southern Co [100.0%]	32.3563	-81.1684	exact	Rincon	Effingham		Georgia	https://www.gem.wiki/McIntosh_Steam_Plant	L100000103843	G100000402947	US8425871071	1	808		30	2034	2074	2114	101	101	101	101	101	101	101	101	101	101	101	101
oil/gas	United States	Americas	Northern America	McIntosh Steam Plant	CT4			101	operating	1994		GT	NG/FO					Georgia Power Co [100.0%]	Southern Co [100.0%]	32.3563	-81.1684	exact	Rincon	Effingham		Georgia	https://www.gem.wiki/McIntosh_Steam_Plant	L100000103843	G100000402948	US8425871071	1	808		30	2034	2074	2114	101	101	101	101	101	101	101	101	101	101	101	101
oil/gas	United States	Americas	Northern America	McIntosh Steam Plant	CT5			101	operating	1994		GT	NG/FO					Georgia Power Co [100.0%]	Southern Co [100.0%]	32.3563	-81.1684	exact	Rincon	Effingham		Georgia	https://www.gem.wiki/McIntosh_Steam_Plant	L100000103843	G100000402949	US8425871071	1	808		30	2034	2074	2114	101	101	101	101	101	101	101	101	101	101	101	101
oil/gas	United States	Americas	Northern America	McIntosh Steam Plant	CT6			101	operating	1994		GT	NG/FO					Georgia Power Co [100.0%]	Southern Co [100.0%]	32.3563	-81.1684	exact	Rincon	Effingham		Georgia	https://www.gem.wiki/McIntosh_Steam_Plant	L100000103843	G100000402950	US8425871071	1	808		30	2034	2074	2114	101	101	101	101	101	101	101	101	101	101	101	101
oil/gas	United States	Americas	Northern America	McIntosh Steam Plant	CT7			101	operating	1994		GT	NG/FO					Georgia Power Co [100.0%]	Southern Co [100.0%]	32.3563	-81.1684	exact	Rincon	Effingham		Georgia	https://www.gem.wiki/McIntosh_Steam_Plant	L100000103843	G100000402951	US8425871071	1	808		30	2034	2074	2114	101	101	101	101	101	101	101	101	101	101	101	101
oil/gas	United States	Americas	Northern America	McIntosh Steam Plant	CT8			101	operating	1994		GT	NG/FO					Georgia Power Co [100.0%]	Southern Co [100.0%]	32.3563	-81.1684	exact	Rincon	Effingham		Georgia	https://www.gem.wiki/McIntosh_Steam_Plant	L100000103843	G100000402952	US8425871071	1	808		30	2034	2074	2114	101	101	101	101	101	101	101	101	101	101	101	101
oil/gas	United States	Americas	Northern America	McIntosh Steam Plant	CT1			101	operating	1995		GT	NG/FO					Georgia Power Co [100.0%]	Southern Co [100.0%]	32.3563	-81.1684	exact	Rincon	Effingham		Georgia	https://www.gem.wiki/McIntosh_Steam_Plant	L100000103843	G100000402945	US8425871071	1	808		29	2035	2075	2115	101	101	101	101	101	101	101	101	101	101	101	101
oil/gas	United States	Americas	Northern America	McIntosh Steam Plant	CT2			101	operating	1995		GT	NG/FO					Georgia Power Co [100.0%]	Southern Co [100.0%]	32.3563	-81.1684	exact	Rincon	Effingham		Georgia	https://www.gem.wiki/McIntosh_Steam_Plant	L100000103843	G100000402946	US8425871071	1	808	808	29	2035	2075	2115	101	101	101	101	101	101	101	101	101	101	101	101
oil/gas	United States	Americas	Northern America	McManus power station	3A			55.4	operating	1972		GT	FO					Georgia Power Co [100.0%]	Southern Co [100.0%]	31.2136	-81.5462	exact	Brunswick	Glynn		Georgia	https://www.gem.wiki/McManus_power_station	L100000409266	G100000414239	US8425871071	1	558		52	2012	2052	2092	55.4	55.4	55.4	55.4	55.4	55.4	55.4	55.4	55.4	55.4	55.4	55.4
oil/gas	United States	Americas	Northern America	McManus power station	3B			55.4	operating	1972		GT	FO					Georgia Power Co [100.0%]	Southern Co [100.0%]	31.2136	-81.5462	exact	Brunswick	Glynn		Georgia	https://www.gem.wiki/McManus_power_station	L100000409266	G100000414238	US8425871071	1	558		52	2012	2052	2092	55.4	55.4	55.4	55.4	55.4	55.4	55.4	55.4	55.4	55.4	55.4	55.4
oil/gas	United States	Americas	Northern America	McManus power station	3C			55.4	operating	1972		GT	FO					Georgia Power Co [100.0%]	Southern Co [100.0%]	31.2136	-81.5462	exact	Brunswick	Glynn		Georgia	https://www.gem.wiki/McManus_power_station	L100000409266	G100000414237	US8425871071	1	558		52	2012	2052	2092	55.4	55.4	55.4	55.4	55.4	55.4	55.4	55.4	55.4	55.4	55.4	55.4
oil/gas	United States	Americas	Northern America	McManus power station	4A			65.3	operating	1972		GT	FO					Georgia Power Co [100.0%]	Southern Co [100.0%]	31.2136	-81.5462	exact	Brunswick	Glynn		Georgia	https://www.gem.wiki/McManus_power_station	L100000409266	G100000414236	US8425871071	1	558		52	2012	2052	2092	65.3	65.3	65.3	65.3	65.3	65.3	65.3	65.3	65.3	65.3	65.3	65.3
oil/gas	United States	Americas	Northern America	McManus power station	4B			65.3	operating	1972		GT	FO					Georgia Power Co [100.0%]	Southern Co [100.0%]	31.2136	-81.5462	exact	Brunswick	Glynn		Georgia	https://www.gem.wiki/McManus_power_station	L100000409266	G100000414235	US8425871071	1	558		52	2012	2052	2092	65.3	65.3	65.3	65.3	65.3	65.3	65.3	65.3	65.3	65.3	65.3	65.3
oil/gas	United States	Americas	Northern America	McManus power station	4C			65.3	operating	1972		GT	FO					Georgia Power Co [100.0%]	Southern Co [100.0%]	31.2136	-81.5462	exact	Brunswick	Glynn		Georgia	https://www.gem.wiki/McManus_power_station	L100000409266	G100000414234	US8425871071	1	558		52	2012	2052	2092	65.3	65.3	65.3	65.3	65.3	65.3	65.3	65.3	65.3	65.3	65.3	65.3
oil/gas	United States	Americas	Northern America	McManus power station	4D			65.3	operating	1972		GT	FO					Georgia Power Co [100.0%]	Southern Co [100.0%]	31.2136	-81.5462	exact	Brunswick	Glynn		Georgia	https://www.gem.wiki/McManus_power_station	L100000409266	G100000414233	US8425871071	1	558		52	2012	2052	2092	65.3	65.3	65.3	65.3	65.3	65.3	65.3	65.3	65.3	65.3	65.3	65.3
oil/gas	United States	Americas	Northern America	McManus power station	4E			65.3	operating	1972		GT	FO					Georgia Power Co [100.0%]	Southern Co [100.0%]	31.2136	-81.5462	exact	Brunswick	Glynn		Georgia	https://www.gem.wiki/McManus_power_station	L100000409266	G100000414232	US8425871071	1	558		52	2012	2052	2092	65.3	65.3	65.3	65.3	65.3	65.3	65.3	65.3	65.3	65.3	65.3	65.3
oil/gas	United States	Americas	Northern America	McManus power station	4F			65.3	operating	1972		GT	FO					Georgia Power Co [100.0%]	Southern Co [100.0%]	31.2136	-81.5462	exact	Brunswick	Glynn		Georgia	https://www.gem.wiki/McManus_power_station	L100000409266	G100000414231	US8425871071	1	558	558	52	2012	2052	2092	65.3	65.3	65.3	65.3	65.3	65.3	65.3	65.3	65.3	65.3	65.3	65.3
oil/gas	United States	Americas	Northern America	Ratcliffe power plant	1			840	operating	2014		CC	NG					Mississippi Power Co [100.0%]	Southern Co [100.0%]	32.6547	-88.7622	exact	De Kalb	Kemper		Mississippi	https://www.gem.wiki/Ratcliffe_power_plant	L100000402096	G100000402041	US8425871071	1	840	840	10	2054	2094	2134	840	840	840	840	840	840	840	840	840	840	840	840
oil/gas	United States	Americas	Northern America	Robins power station	1			92	operating	1995		GT	NG/FO					Georgia Power Co [100.0%]	Southern Co [100.0%]	32.5792	-83.5822	exact	Robins AFB	Houston		Georgia	https://www.gem.wiki/Robins_power_station	L100000401980	G100000402953	US8425871071	1	184		29	2035	2075	2115	92	92	92	92	92	92	92	92	92	92	92	92
oil/gas	United States	Americas	Northern America	Robins power station	2			92	operating	1995		GT	NG/FO					Georgia Power Co [100.0%]	Southern Co [100.0%]	32.5792	-83.5822	exact	Robins AFB	Houston		Georgia	https://www.gem.wiki/Robins_power_station	L100000401980	G100000402954	US8425871071	1	184	184	29	2035	2075	2115	92	92	92	92	92	92	92	92	92	92	92	92
oil/gas	United States	Americas	Northern America	Rowan power station	1			199	operating	2001		GT	FO/NG					Southern Power Co [100.0%]	Southern Co [100.0%]	35.7314	-80.6019	exact	Salisbury	Rowan		North Carolina	https://www.gem.wiki/Rowan_power_station	L100000402288	G100000403536	US8425871071	1	1191		23	2041	2081	2121	199	199	199	199	199	199	199	199	199	199	199	199
oil/gas	United States	Americas	Northern America	Rowan power station	2			199	operating	2001		GT	FO/NG					Southern Power Co [100.0%]	Southern Co [100.0%]	35.7314	-80.6019	exact	Salisbury	Rowan		North Carolina	https://www.gem.wiki/Rowan_power_station	L100000402288	G100000403537	US8425871071	1	1191		23	2041	2081	2121	199	199	199	199	199	199	199	199	199	199	199	199
oil/gas	United States	Americas	Northern America	Rowan power station	3			199	operating	2001		GT	FO/NG					Southern Power Co [100.0%]	Southern Co [100.0%]	35.7314	-80.6019	exact	Salisbury	Rowan		North Carolina	https://www.gem.wiki/Rowan_power_station	L100000402288	G100000403538	US8425871071	1	1191		23	2041	2081	2121	199	199	199	199	199	199	199	199	199	199	199	199
oil/gas	United States	Americas	Northern America	Rowan power station	G102			594	operating	2003		CC	NG/FO					Southern Power Co [100.0%]	Southern Co [100.0%]	35.7314	-80.6019	exact	Salisbury	Rowan		North Carolina	https://www.gem.wiki/Rowan_power_station	L100000402288	G100000402174	US8425871071	1	1191	1191	21	2043	2083	2123	594	594	594	594	594	594	594	594	594	594	594	594
oil/gas	United States	Americas	Northern America	Tenaska Central Alabama generating station	STG1			927	operating	2003		CC	NG/FO					Alabama Power Co [100.0%]	Southern Co [100.0%]	32.6497	-86.74	exact	Billingsley	Autauga		Alabama	https://www.gem.wiki/Tenaska_Central_Alabama_generating_station	L100000401620	G100000401923	US8425871071	1	927	927	21	2043	2083	2123	927	927	927	927	927	927	927	927	927	927	927	927
oil/gas	United States	Americas	Northern America	Theodore cogeneration facility	G525			317	operating	2000		CC	NG					Alabama Power Co [100.0%]	Southern Co [100.0%]	30.5254	-88.1285	exact	Theodore	Mobile		Alabama	https://www.gem.wiki/Theodore_cogeneration_facility	L100000401698	G100000402168	US8425871071	1	317	317	24	2040	2080	2120	317	317	317	317	317	317	317	317	317	317	317	317
oil/gas	United States	Americas	Northern America	Victor J Daniel Jr power station	3		Plant Daniel	566	operating	2001		CC	NG					Mississippi Power Co [100.0%]	Southern Co [100.0%]	30.5322	-88.5553	exact	Escatawpa	Jackson		Mississippi	https://www.gem.wiki/Victor_J_Daniel_Jr_power_station	L100000402097	G100000402099	US8425871071	1	1132		23	2041	2081	2121	566	566	566	566	566	566	566	566	566	566	566	566
oil/gas	United States	Americas	Northern America	Victor J Daniel Jr power station	4		Plant Daniel	566	operating	2001		CC	NG					Mississippi Power Co [100.0%]	Southern Co [100.0%]	30.5322	-88.5553	exact	Escatawpa	Jackson		Mississippi	https://www.gem.wiki/Victor_J_Daniel_Jr_power_station	L100000402097	G100000402100	US8425871071	1	1132	1132	23	2041	2081	2121	566	566	566	566	566	566	566	566	566	566	566	566
oil/gas	United States	Americas	Northern America	Wansley Plant	G106			620	operating	2002		CC	NG					Southern Power Co [100.0%]	Southern Co [100.0%]	33.4064	-85.037	exact	Franklin	Heard		Georgia	https://www.gem.wiki/Wansley_Plant	L100000103848	G100000401986	US8425871071	1	3144		22	2042	2082	2122	620	620	620	620	620	620	620	620	620	620	620	620
oil/gas	United States	Americas	Northern America	Wansley Plant	G107			620	operating	2002		CC	NG					Southern Power Co [100.0%]	Southern Co [100.0%]	33.4064	-85.037	exact	Franklin	Heard		Georgia	https://www.gem.wiki/Wansley_Plant	L100000103848	G100000401987	US8425871071	1	3144	3144	22	2042	2082	2122	620	620	620	620	620	620	620	620	620	620	620	620
oil/gas	United States	Americas	Northern America	Wansley power station	5A			52.8	retired	1980	2022	GT	FO					Georgia Power Co [53.5%]; Oglethorpe Power Corp [30.0%]; Municipal Electric Authority of Georgia [15.1%]; Dalton Utilities [1.4%]	Southern Co [53.5%]; Municipal Electric Authority of Georgia [15.1%]	33.4134	-85.0323	exact	Roopville	Heard		Georgia	https://www.gem.wiki/Wansley_power_station	L100000409254	G100000414179	US8425871071	0.535	52.8	52.8	44	2020	2060	2100	28.248	28.248	0	0	0	0	0	0	0	0	0	0
oil/gas	United States	Americas	Northern America	Washington County cogeneration facility (AL)	G523			123	operating	1999		CC	NG					Alabama Power Co [100.0%]	Southern Co [100.0%]	31.2504	-88.0156	exact	McIntosh	Washington		Alabama	https://www.gem.wiki/Washington_County_cogeneration_facility_(AL)	L100000401699	G100000402162	US8425871071	1	123	123	25	2039	2079	2119	123	123	123	123	123	123	123	123	123	123	123	123
oil/gas	United States	Americas	Northern America	Wilson power station	5A			52.5	operating	1972		GT	FO					Georgia Power Co [100.0%]	Southern Co [100.0%]	33.1377	-81.7483	exact	Waynesboro	Burke		Georgia	https://www.gem.wiki/Wilson_Station	L100000409274	G100000414112	US8425871071	1	315		52	2012	2052	2092	52.5	52.5	52.5	52.5	52.5	52.5	52.5	52.5	52.5	52.5	52.5	52.5
oil/gas	United States	Americas	Northern America	Wilson power station	5B			52.5	operating	1972		GT	FO					Georgia Power Co [100.0%]	Southern Co [100.0%]	33.1377	-81.7483	exact	Waynesboro	Burke		Georgia	https://www.gem.wiki/Wilson_Station	L100000409274	G100000414111	US8425871071	1	315		52	2012	2052	2092	52.5	52.5	52.5	52.5	52.5	52.5	52.5	52.5	52.5	52.5	52.5	52.5
oil/gas	United States	Americas	Northern America	Wilson power station	5C			52.5	operating	1972		GT	FO					Georgia Power Co [100.0%]	Southern Co [100.0%]	33.1377	-81.7483	exact	Waynesboro	Burke		Georgia	https://www.gem.wiki/Wilson_Station	L100000409274	G100000414110	US8425871071	1	315		52	2012	2052	2092	52.5	52.5	52.5	52.5	52.5	52.5	52.5	52.5	52.5	52.5	52.5	52.5
oil/gas	United States	Americas	Northern America	Wilson power station	5D			52.5	operating	1973		GT	FO					Georgia Power Co [100.0%]	Southern Co [100.0%]	33.1377	-81.7483	exact	Waynesboro	Burke		Georgia	https://www.gem.wiki/Wilson_Station	L100000409274	G100000414109	US8425871071	1	315		51	2013	2053	2093	52.5	52.5	52.5	52.5	52.5	52.5	52.5	52.5	52.5	52.5	52.5	52.5
oil/gas	United States	Americas	Northern America	Wilson power station	5E			52.5	operating	1973		GT	FO					Georgia Power Co [100.0%]	Southern Co [100.0%]	33.1377	-81.7483	exact	Waynesboro	Burke		Georgia	https://www.gem.wiki/Wilson_Station	L100000409274	G100000414108	US8425871071	1	315		51	2013	2053	2093	52.5	52.5	52.5	52.5	52.5	52.5	52.5	52.5	52.5	52.5	52.5	52.5
oil/gas	United States	Americas	Northern America	Wilson power station	5F			52.5	operating	1973		GT	FO					Georgia Power Co [100.0%]	Southern Co [100.0%]	33.1377	-81.7483	exact	Waynesboro	Burke		Georgia	https://www.gem.wiki/Wilson_power_station	L100000409274	G100000414107	US8425871071	1	315	315	51	2013	2053	2093	52.5	52.5	52.5	52.5	52.5	52.5	52.5	52.5	52.5	52.5	52.5	52.5
oil/gas	United States	Americas	Northern America	Yates Steam Generating Plant	6			404	operating	2015		ST	NG					Georgia Power Co [100.0%]	Southern Co [100.0%]	33.4622	-84.8986	exact	Newnan	Coweta		Georgia	https://www.gem.wiki/Yates_Steam_Generating_Plant	L100000103850	G100000402955	US8425871071	1	808		9	2055	2095	2135	404	404	404	404	404	404	404	404	404	404	404	404
oil/gas	United States	Americas	Northern America	Yates Steam Generating Plant	7			404	operating	2015		ST	NG					Georgia Power Co [100.0%]	Southern Co [100.0%]	33.4622	-84.8986	exact	Newnan	Coweta		Georgia	https://www.gem.wiki/Yates_Steam_Generating_Plant	L100000103850	G100000402956	US8425871071	1	808	808	9	2055	2095	2135	404	404	404	404	404	404	404	404	404	404	404	404
solar	United States	Americas	Northern America	Campo Verde Solar				147	operating	2013		PV						Southern Company; Turner Renewable Energy		32.7533	-115.726	exact		Imperial County		California	https://gem.wiki/Campo_Verde_Solar	L804482	G805153	US8425871071	0.5	147	147	11	2053	2093	2133	73.5	73.5	73.5	73.5	73.5	73.5	73.5	73.5	73.5	73.5	73.5	73.5
solar	United States	Americas	Northern America	Cimarron Solar Facility				31	operating	2010		PV						Southern Company; Turner Renewable Energy		36.4681	-104.636	exact		Colfax County		New Mexico	https://gem.wiki/Cimarron_Solar_Facility	L804483	G805154	US8425871071	0.5	31	31	14	2050	2090	2130	15.5	15.5	15.5	15.5	15.5	15.5	15.5	15.5	15.5	15.5	15.5	15.5
wind	China	Asia	Eastern Asia	Guizhou Tongzi Huanglianba wind farm		贵州桐梓黄莲坝风电场		50	operating	2020		onshore						China Power Construction New Energy Southern Co. [majority]; Beijing Tianrun New Energy Investment CO LTD		27.0001	107	approximate	Huanglian Xiang	Tongzi County	Zunyi Municipality	Guizhou	https://gem.wiki/Guizhou_Tongzi_Huanglianba_wind_farm	L903393	G904171	US8425871071	0.5	50	50	4	2060	2100	2140	25	25	25	25	25	25	25	25	25	25	25	25
wind	United States	Americas	Northern America	Ruso wind farm	1			205	shelved			onshore						Southern Company		48.3088	-101.515	approximate		Ward County		North Dakota	https://gem.wiki/Ruso_wind_farm	L907434	G910024	US8425871071	1	205	205	-99	40	80	120	0	0	0	0	0	0	0	0	0	0	0	0
																																		2421.09	2421.09	0	0	33812.7	33812.7	32765.8	33401.8	33401.8	33401.8	33401.8	33401.8	34227.8	34227.8	34227.8	34227.8
																																					Coal	11199.7	11199.7	10181	10181	10181	10181	10181	10181	10181	10181	10181	10181
																																					Oil&Gas	22499	22499	22470.8	23106.8	23106.8	23106.8	23106.8	23106.8	23932.8	23932.8	23932.8	23932.8
																																					Fossil fuel	33698.7	33698.7	32651.8	33287.8	33287.8	33287.8	33287.8	33287.8	34113.8	34113.8	34113.8	34113.8
																																					Renewables	114	114	114	114	114	114	114	114	114	114	114	114
																																					Oil	9902.7	9902.7	9874.45	9874.45	9874.45	9874.45	9874.45	9874.45	9874.45	9874.45	9874.45	9874.45
																																					Gas	21548.3	21548.3	21548.3	22184.3	22184.3	22184.3	22184.3	22184.3	23010.3	23010.3	23010.3	23010.3
																																					Nuclear	0	0	0	0	0	0	0	0	0	0	0	0
																																					Wind	25	25	25	25	25	25	25	25	25	25	25	25
																																					solar	89	89	89	89	89	89	89	89	89	89	89	89
																																					Total capacity without discounts	38164.1	38164.1	36207.3	36843.3
																																					Total capacity without discounts	37936.1	37936.1	35979.3	36615.3
[truncated: 19 more columns]

## Sheet: SouthernCo_TP
Type	Country/area	Region	Subregion	Plant / Project name	Unit / Phase name	Plant / Project name (local)	Plant / Project name (other)	Capacity (MW)	Status	Start year	Retired year	Technology	Fuel	Country/area 1 (hydropower only)	Country/area 2 (hydropower only)	Country/area 1 Capacity (MW) (hydropower only)	Country/area 2 Capacity (MW) (hydropower only)	Owner	Parent	Latitude	Longitude	Location accuracy	City	Local area (taluk, county)	Major area (prefecture, district)	Subnational unit (state, province)	GEM.Wiki URL	GEM location ID	GEM unit/phase ID	CompISIN	Ownership	Plant capacity	Plant capacity	Age	Reinvestment year	Reinvestment year	Reinvestment year	2020	2021	2022	2023	2024	2025	2026	2027	2028	2029	2030	2031
coal	United States	Americas	Northern America	Barry Steam Plant	Unit 4			403.7	operating	1969	2028	subcritical	bituminous					Alabama Power [100%]	Southern Co [100.0%]	31.0066	-88.0088	exact	Bucks	Mobile		Alabama	https://www.gem.wiki/Barry_Steam_Plant	L100000103776	G100000100647	US8425871071	1	3692.5		55	2009	2049	2089	403.7	403.7	403.7	403.7	403.7	403.7	403.7	403.7	0	0	0	0
coal	United States	Americas	Northern America	Barry Steam Plant	Unit 5			788.8	operating	1971	2028	supercritical	bituminous					Alabama Power [100%]	Southern Co [100.0%]	31.0066	-88.0088	exact	Bucks	Mobile		Alabama	https://www.gem.wiki/Barry_Steam_Plant	L100000103776	G100000100648	US8425871071	1	3692.5	3692.5	53	2011	2051	2091	788.8	788.8	788.8	788.8	788.8	788.8	788.8	788.8	0	0	0	0
coal	United States	Americas	Northern America	Daniel Generating Plant	Unit 1		Victor J. Daniel Generating Plant	500	operating	1977	2024	subcritical	bituminous					Florida Power & Light [50%]; Mississippi Power [50%]	NextEra Energy Inc [50.0%]; Southern Co [50.0%]	30.5327	-88.5571	exact	Escatawpa	Jackson		Mississippi	https://www.gem.wiki/Daniel_Generating_Plant	L100000104008	G100000101965	US8425871071	0.5	1000		47	2017	2057	2097	250	250	250	250	0	0	0	0	0	0	0	0
coal	United States	Americas	Northern America	Daniel Generating Plant	Unit 2		Victor J. Daniel Generating Plant	500	operating	1981	2027	subcritical	bituminous					Florida Power & Light [50%]; Mississippi Power [50%]	NextEra Energy Inc [50.0%]; Southern Co [50.0%]	30.5327	-88.5571	exact	Escatawpa	Jackson		Mississippi	https://www.gem.wiki/Daniel_Generating_Plant	L100000104008	G100000101966	US8425871071	0.5	1000	1000	43	2021	2061	2101	250	250	250	250	250	250	250	0	0	0	0	0
coal	United States	Americas	Northern America	Gaston Steam Plant	Unit 5		EC Gaston power station	952	operating	1974	2028	supercritical	bituminous					Alabama Power [100%]	Southern Co [100.0%]	33.2432	-86.4589	exact	Wilsonville	Shelby		Alabama	https://www.gem.wiki/Gaston_Steam_Plant	L100000103780	G100000102959	US8425871071	1	2965	2965	50	2014	2054	2094	952	952	952	952	952	952	952	952	0	0	0	0
coal	United States	Americas	Northern America	Miller Steam Plant	Unit 1		James H. Miller Jr. Steam Plant	705.5	operating	1978		subcritical	subbituminous					Alabama Power [91%]; PowerSouth Energy Cooperative [8%]	Southern Co [91.8%]; PowerSouth Energy Cooperative [8.2%]	33.6332	-87.0598	exact	West Jefferson	Jefferson		Alabama	https://www.gem.wiki/Miller_Steam_Plant	L100000103783	G100000106922	US8425871071	0.918	2822		46	2018	2058	2098	647.649	647.649	647.649	647.649	647.649	647.649	647.649	647.649	647.649	647.649	647.649	647.649
coal	United States	Americas	Northern America	Miller Steam Plant	Unit 2		James H. Miller Jr. Steam Plant	705.5	operating	1985		subcritical	subbituminous					Alabama Power [91%]; PowerSouth Energy Cooperative [8%]	Southern Co [91.8%]; PowerSouth Energy Cooperative [8.2%]	33.6332	-87.0598	exact	West Jefferson	Jefferson		Alabama	https://www.gem.wiki/Miller_Steam_Plant	L100000103783	G100000106923	US8425871071	0.918	2822		39	2025	2065	2105	647.649	647.649	647.649	647.649	647.649	647.649	647.649	647.649	647.649	647.649	647.649	647.649
coal	United States	Americas	Northern America	Miller Steam Plant	Unit 3		James H. Miller Jr. Steam Plant	705.5	operating	1989		subcritical	subbituminous					Alabama Power [100%]	Southern Co [100.0%]	33.6332	-87.0598	exact	West Jefferson	Jefferson		Alabama	https://www.gem.wiki/Miller_Steam_Plant	L100000103783	G100000106924	US8425871071	1	2822		35	2029	2069	2109	705.5	705.5	705.5	705.5	705.5	705.5	705.5	705.5	705.5	705.5	705.5	705.5
coal	United States	Americas	Northern America	Miller Steam Plant	Unit 4		James H. Miller Jr. Steam Plant	705.5	operating	1991		subcritical	subbituminous					Alabama Power [100%]	Southern Co [100.0%]	33.6332	-87.0598	exact	West Jefferson	Jefferson		Alabama	https://www.gem.wiki/Miller_Steam_Plant	L100000103783	G100000106925	US8425871071	1	2822	2822	33	2031	2071	2111	705.5	705.5	705.5	705.5	705.5	705.5	705.5	705.5	705.5	705.5	705.5	705.5
coal	United States	Americas	Northern America	Plant Bowen	Unit 1			805.8	operating	1971	2028	supercritical	bituminous					Georgia Power [100%]	Southern Co [100.0%]	34.126	-84.9207	exact	Taylorsville	Bartow		Georgia	https://www.gem.wiki/Plant_Bowen	L100000103845	G100000108023	US8425871071	1	3498.6		53	2011	2051	2091	805.8	805.8	805.8	805.8	805.8	805.8	805.8	805.8	0	0	0	0
coal	United States	Americas	Northern America	Plant Bowen	Unit 2			788.8	operating	1972	2028	supercritical	bituminous					Georgia Power [100%]	Southern Co [100.0%]	34.126	-84.9207	exact	Taylorsville	Bartow		Georgia	https://www.gem.wiki/Plant_Bowen	L100000103845	G100000108024	US8425871071	1	3498.6		52	2012	2052	2092	788.8	788.8	788.8	788.8	788.8	788.8	788.8	788.8	0	0	0	0
coal	United States	Americas	Northern America	Plant Bowen	Unit 3			952	operating	1974	2035	supercritical	bituminous					Georgia Power [100%]	Southern Co [100.0%]	34.126	-84.9207	exact	Taylorsville	Bartow		Georgia	https://www.gem.wiki/Plant_Bowen	L100000103845	G100000108025	US8425871071	1	3498.6		50	2014	2054	2094	952	952	952	952	952	952	952	952	952	952	952	952
coal	United States	Americas	Northern America	Plant Bowen	Unit 4			952	operating	1975	2035	supercritical	bituminous					Georgia Power [100%]	Southern Co [100.0%]	34.126	-84.9207	exact	Taylorsville	Bartow		Georgia	https://www.gem.wiki/Plant_Bowen	L100000103845	G100000108026	US8425871071	1	3498.6	3498.6	49	2015	2055	2095	952	952	952	952	952	952	952	952	952	952	952	952
coal	United States	Americas	Northern America	Red Hills Generation Facility	Unit 1		11199.7	513.7	operating	2001		subcritical	lignite					S E Choctaw [100%]	Southern Co [100.0%]	33.3762	-89.2185	exact	Red Hills	Choctaw		Mississippi	https://www.gem.wiki/Red_Hills_Generation_Facility	L100000104012	G100000108505	US8425871071	1	513.7	513.7	23	2041	2081	2121	513.7	513.7	513.7	513.7	513.7	513.7	513.7	513.7	513.7	513.7	513.7	513.7
coal	United States	Americas	Northern America	Scherer Steam Generating Station	Unit 1		1455.96	891	operating	1982		subcritical	subbituminous					other unknown/mixed entity types [1%]; Oglethorpe Power [60%]; Municipal Electric Authority of Georgia [30%]; Georgia Power [8%]	Oglethorpe Power [60.0%]; Municipal Electric Authority of Georgia [30.2%]; Southern Co [8.4%]; other unknown/mixed entity types [1.4%]	33.0603	-83.8069	exact	Juliette	Monroe		Georgia	https://www.gem.wiki/Scherer_Steam_Generating_Station	L100000103847	G100000108869	US8425871071	0.084	2673		42	2022	2062	2102	74.844	74.844	74.844	74.844	74.844	74.844	74.844	74.844	74.844	74.844	74.844	74.844
coal	United States	Americas	Northern America	Scherer Steam Generating Station	Unit 2			891	operating	1984		subcritical	subbituminous					Municipal Electric Authority of Georgia [30%]; Oglethorpe Power [60%]; Georgia Power [8%]; other unknown/mixed entity types [1%]	Oglethorpe Power [60.0%]; Municipal Electric Authority of Georgia [30.2%]; Southern Co [8.4%]; other unknown/mixed entity types [1.4%]	33.0603	-83.8069	exact	Juliette	Monroe		Georgia	https://www.gem.wiki/Scherer_Steam_Generating_Station	L100000103847	G100000108870	US8425871071	0.084	2673		40	2024	2064	2104	74.844	74.844	74.844	74.844	74.844	74.844	74.844	74.844	74.844	74.844	74.844	74.844
coal	United States	Americas	Northern America	Scherer Steam Generating Station	Unit 3			891	operating	1987	2028	subcritical	subbituminous					Florida Power & Light [25%]; Georgia Power [75%]	Southern Co [75.0%]; NextEra Energy Inc [25.0%]	33.0603	-83.8069	exact	Juliette	Monroe		Georgia	https://www.gem.wiki/Scherer_Steam_Generating_Station	L100000103847	G100000108871	US8425871071	0.75	2673	2673	37	2027	2067	2107	668.25	668.25	668.25	668.25	668.25	668.25	668.25	668.25	0	0	0	0
coal	United States	Americas	Northern America	Wansley Plant	Unit 1			952	retired	1976	2022	supercritical	bituminous					Oglethorpe Power [30%]; Municipal Electric Authority of Georgia [15%]; Georgia Power [53%]; other unknown/mixed entity types [1%]	Southern Co [53.5%]; Oglethorpe Power [30.0%]; Municipal Electric Authority of Georgia [15.1%]; other unknown/mixed entity types [1.4%]	33.4127	-85.0339	exact	Roopville	Heard		Georgia	https://www.gem.wiki/Wansley_Plant	L100000103848	G100000110728	US8425871071	0.535	3144		48	2016	2056	2096	509.32	509.32	0	0	0	0	0	0	0	0	0	0
coal	United States	Americas	Northern America	Wansley Plant	Unit 2			952	retired	1978	2022	supercritical	bituminous					Oglethorpe Power [30%]; Municipal Electric Authority of Georgia [15%]; Georgia Power [53%]; other unknown/mixed entity types [1%]	Southern Co [53.5%]; Oglethorpe Power [30.0%]; Municipal Electric Authority of Georgia [15.1%]; other unknown/mixed entity types [1.4%]	33.4127	-85.0339	exact	Roopville	Heard		Georgia	https://www.gem.wiki/Wansley_Plant	L100000103848	G100000110729	US8425871071	0.535	3144	3144	46	2018	2058	2098	509.32	509.32	0	0	0	0	0	0	0	0	0	0
oil/gas	United States	Americas	Northern America	Barry Steam Plant	G521		James M. Barry Electric Generating Plant	535	operating	2000		CC	NG					Alabama Power Co [100.0%]	Southern Co [100.0%]	31.0069	-88.0103	exact	Bucks	Mobile		Alabama	https://www.gem.wiki/Barry_Steam_Plant	L100000103776	G100000401686	US8425871071	1	3692.5		24	2040	2080	2120	535	535	535	535	535	535	535	535	535	535	535	535
oil/gas	United States	Americas	Northern America	Barry Steam Plant	G522		James M. Barry Electric Generating Plant	535	operating	2000		CC	NG					Alabama Power Co [100.0%]	Southern Co [100.0%]	31.0069	-88.0103	exact	Bucks	Mobile		Alabama	https://www.gem.wiki/Barry_Steam_Plant	L100000103776	G100000401687	US8425871071	1	3692.5		24	2040	2080	2120	535	535	535	535	535	535	535	535	535	535	535	535
oil/gas	United States	Americas	Northern America	Barry Steam Plant	1		James M. Barry Electric Generating Plant	153	operating	2015		ST	NG					Alabama Power Co [100.0%]	Southern Co [100.0%]	31.0069	-88.0103	exact	Bucks	Mobile		Alabama	https://www.gem.wiki/Barry_Steam_Plant	L100000103776	G100000402400	US8425871071	1	3692.5		9	2055	2095	2135	153	153	153	153	153	153	153	153	153	153	153	153
oil/gas	United States	Americas	Northern America	Barry Steam Plant	2		James M. Barry Electric Generating Plant	153	operating	2015		ST	NG					Alabama Power Co [100.0%]	Southern Co [100.0%]	31.0069	-88.0103	exact	Bucks	Mobile		Alabama	https://www.gem.wiki/Barry_Steam_Plant	L100000103776	G100000402401	US8425871071	1	3692.5		9	2055	2095	2135	153	153	153	153	153	153	153	153	153	153	153	153
oil/gas	United States	Americas	Northern America	Barry Steam Plant	G523		James M. Barry Electric Generating Plant	774	operating	2023		CC	NG					Alabama Power Co [100.0%]	Southern Co [100.0%]	31.0069	-88.0103	exact	Bucks	Mobile		Alabama	https://www.gem.wiki/Barry_Steam_Plant	L100000103776	G100000409443	US8425871071	1	3692.5		1	2063	2103	2143	0	0	0	774	774	774	774	774	774	774	774	774
oil/gas	United States	Americas	Northern America	Barry Steam Plant	4		James M. Barry Electric Generating Plant	350	pre-construction	2028		ST	NG					Alabama Power Co [100.0%]	Southern Co [100.0%]	31.0069	-88.0103	exact	Bucks	Mobile		Alabama	https://www.gem.wiki/Barry_Steam_Plant	L100000103776	G100000410538	US8425871071	1	3692.5	3692.5	-4	2068	2108	2148	0	0	0	0	0	0	0	0	350	350	350	350
oil/gas	United States	Americas	Northern America	Chevron Oil power station	5			101	operating	1994		GT	NG					Mississippi Power Co [100.0%]	Southern Co [100.0%]	30.34	-88.4919	exact	Pascagoula	Jackson		Mississippi	https://www.gem.wiki/Chevron_Oil_power_station	L100000402094	G100000403187	US8425871071	1	101	101	30	2034	2074	2114	101	101	101	101	101	101	101	101	101	101	101	101
oil/gas	United States	Americas	Northern America	Cleveland County generating facility	1			184	operating	2012		GT	NG/FO					Southern Power Co [100.0%]	Southern Co [100.0%]	35.1705	-81.4167	exact	Kings Mountain	Cleveland		North Carolina	https://www.gem.wiki/Cleveland_County_generating_facility	L100000402282	G100000403518	US8425871071	1	736		12	2052	2092	2132	184	184	184	184	184	184	184	184	184	184	184	184
oil/gas	United States	Americas	Northern America	Cleveland County generating facility	2			184	operating	2012		GT	NG/FO					Southern Power Co [100.0%]	Southern Co [100.0%]	35.1705	-81.4167	exact	Kings Mountain	Cleveland		North Carolina	https://www.gem.wiki/Cleveland_County_generating_facility	L100000402282	G100000403519	US8425871071	1	736		12	2052	2092	2132	184	184	184	184	184	184	184	184	184	184	184	184
oil/gas	United States	Americas	Northern America	Cleveland County generating facility	3			184	operating	2012		GT	NG/FO					Southern Power Co [100.0%]	Southern Co [100.0%]	35.1705	-81.4167	exact	Kings Mountain	Cleveland		North Carolina	https://www.gem.wiki/Cleveland_County_generating_facility	L100000402282	G100000403520	US8425871071	1	736		12	2052	2092	2132	184	184	184	184	184	184	184	184	184	184	184	184
oil/gas	United States	Americas	Northern America	Cleveland County generating facility	4			184	operating	2012		GT	NG/FO					Southern Power Co [100.0%]	Southern Co [100.0%]	35.1705	-81.4167	exact	Kings Mountain	Cleveland		North Carolina	https://www.gem.wiki/Cleveland_County_generating_facility	L100000402282	G100000403521	US8425871071	1	736	736	12	2052	2092	2132	184	184	184	184	184	184	184	184	184	184	184	184
oil/gas	United States	Americas	Northern America	Dahlberg power station	1			92	operating	2000		GT	NG/FO					Southern Power Co [100.0%]	Southern Co [100.0%]	34.0423	-83.3977	exact	Nicholson	Jackson		Georgia	https://www.gem.wiki/Dahlberg_power_station	L100000402283	G100000403522	US8425871071	1	920		24	2040	2080	2120	92	92	92	92	92	92	92	92	92	92	92	92
oil/gas	United States	Americas	Northern America	Dahlberg power station	2			92	operating	2000		GT	NG/FO					Southern Power Co [100.0%]	Southern Co [100.0%]	34.0423	-83.3977	exact	Nicholson	Jackson		Georgia	https://www.gem.wiki/Dahlberg_power_station	L100000402283	G100000403524	US8425871071	1	920		24	2040	2080	2120	92	92	92	92	92	92	92	92	92	92	92	92
oil/gas	United States	Americas	Northern America	Dahlberg power station	3			92	operating	2000		GT	NG/FO					Southern Power Co [100.0%]	Southern Co [100.0%]	34.0423	-83.3977	exact	Nicholson	Jackson		Georgia	https://www.gem.wiki/Dahlberg_power_station	L100000402283	G100000403525	US8425871071	1	920		24	2040	2080	2120	92	92	92	92	92	92	92	92	92	92	92	92
oil/gas	United States	Americas	Northern America	Dahlberg power station	4			92	operating	2000		GT	NG/FO					Southern Power Co [100.0%]	Southern Co [100.0%]	34.0423	-83.3977	exact	Nicholson	Jackson		Georgia	https://www.gem.wiki/Dahlberg_power_station	L100000402283	G100000403526	US8425871071	1	920		24	2040	2080	2120	92	92	92	92	92	92	92	92	92	92	92	92
oil/gas	United States	Americas	Northern America	Dahlberg power station	5			92	operating	2000		GT	NG/FO					Southern Power Co [100.0%]	Southern Co [100.0%]	34.0423	-83.3977	exact	Nicholson	Jackson		Georgia	https://www.gem.wiki/Dahlberg_power_station	L100000402283	G100000403527	US8425871071	1	920		24	2040	2080	2120	92	92	92	92	92	92	92	92	92	92	92	92
oil/gas	United States	Americas	Northern America	Dahlberg power station	6			92	operating	2000		GT	NG/FO					Southern Power Co [100.0%]	Southern Co [100.0%]	34.0423	-83.3977	exact	Nicholson	Jackson		Georgia	https://www.gem.wiki/Dahlberg_power_station	L100000402283	G100000403528	US8425871071	1	920		24	2040	2080	2120	92	92	92	92	92	92	92	92	92	92	92	92
oil/gas	United States	Americas	Northern America	Dahlberg power station	7			92	operating	2000		GT	NG/FO					Southern Power Co [100.0%]	Southern Co [100.0%]	34.0423	-83.3977	exact	Nicholson	Jackson		Georgia	https://www.gem.wiki/Dahlberg_power_station	L100000402283	G100000403529	US8425871071	1	920		24	2040	2080	2120	92	92	92	92	92	92	92	92	92	92	92	92
oil/gas	United States	Americas	Northern America	Dahlberg power station	8			92	operating	2000		GT	NG/FO					Southern Power Co [100.0%]	Southern Co [100.0%]	34.0423	-83.3977	exact	Nicholson	Jackson		Georgia	https://www.gem.wiki/Dahlberg_power_station	L100000402283	G100000403530	US8425871071	1	920		24	2040	2080	2120	92	92	92	92	92	92	92	92	92	92	92	92
oil/gas	United States	Americas	Northern America	Dahlberg power station	9			92	operating	2001		GT	NG/FO					Southern Power Co [100.0%]	Southern Co [100.0%]	34.0423	-83.3977	exact	Nicholson	Jackson		Georgia	https://www.gem.wiki/Dahlberg_power_station	L100000402283	G100000403531	US8425871071	1	920		23	2041	2081	2121	92	92	92	92	92	92	92	92	92	92	92	92
oil/gas	United States	Americas	Northern America	Dahlberg power station	10			92	operating	2001		GT	NG/FO					Southern Power Co [100.0%]	Southern Co [100.0%]	34.0423	-83.3977	exact	Nicholson	Jackson		Georgia	https://www.gem.wiki/Dahlberg_power_station	L100000402283	G100000403523	US8425871071	1	920	920	23	2041	2081	2121	92	92	92	92	92	92	92	92	92	92	92	92
oil/gas	United States	Americas	Northern America	E B Harris Electric generating plant	G103			652	operating	2003		CC	NG					Southern Power Co [100.0%]	Southern Co [100.0%]	32.3814	-86.5744	exact	Autaugaville	Autauga		Alabama	https://www.gem.wiki/E_B_Harris_Electric_generating_plant	L100000402284	G100000402182	US8425871071	1	1304		21	2043	2083	2123	652	652	652	652	652	652	652	652	652	652	652	652
oil/gas	United States	Americas	Northern America	E B Harris Electric generating plant	G104			652	operating	2003		CC	NG					Southern Power Co [100.0%]	Southern Co [100.0%]	32.3814	-86.5744	exact	Autaugaville	Autauga		Alabama	https://www.gem.wiki/E_B_Harris_Electric_generating_plant	L100000402284	G100000402183	US8425871071	1	1304	1304	21	2043	2083	2123	652	652	652	652	652	652	652	652	652	652	652	652
oil/gas	United States	Americas	Northern America	Edward L. Addison generating plant	712			175	operating	2000		GT	NG/FO					Southern Power Co [100.0%]	Southern Co [100.0%]	32.9111	-84.3064	exact	Thomaston	Upson		Georgia	https://www.gem.wiki/Edward_L._Addison_generating_plant	L100000402285	G100000403532	US8425871071	1	700		24	2040	2080	2120	175	175	175	175	175	175	175	175	175	175	175	175
oil/gas	United States	Americas	Northern America	Edward L. Addison generating plant	713			175	operating	2000		GT	NG/FO					Southern Power Co [100.0%]	Southern Co [100.0%]	32.9111	-84.3064	exact	Thomaston	Upson		Georgia	https://www.gem.wiki/Edward_L._Addison_generating_plant	L100000402285	G100000403533	US8425871071	1	700		24	2040	2080	2120	175	175	175	175	175	175	175	175	175	175	175	175
oil/gas	United States	Americas	Northern America	Edward L. Addison generating plant	714			175	operating	2000		GT	NG/FO					Southern Power Co [100.0%]	Southern Co [100.0%]	32.9111	-84.3064	exact	Thomaston	Upson		Georgia	https://www.gem.wiki/Edward_L._Addison_generating_plant	L100000402285	G100000403534	US8425871071	1	700		24	2040	2080	2120	175	175	175	175	175	175	175	175	175	175	175	175
oil/gas	United States	Americas	Northern America	Edward L. Addison generating plant	715			175	operating	2000		GT	NG/FO					Southern Power Co [100.0%]	Southern Co [100.0%]	32.9111	-84.3064	exact	Thomaston	Upson		Georgia	https://www.gem.wiki/Edward_L._Addison_generating_plant	L100000402285	G100000403535	US8425871071	1	700	700	24	2040	2080	2120	175	175	175	175	175	175	175	175	175	175	175	175
oil/gas	United States	Americas	Northern America	Gadsden Steam Plant	1			69	retired	2015	2023	ST	NG					Alabama Power Co [100.0%]	Southern Co [100.0%]	34.0128	-85.9708	exact	Gadsden	Etowah		Alabama	https://www.gem.wiki/Gadsden_Steam_Plant	L100000103779	G100000402402	US8425871071	1	138		9	2055	2095	2135	69	69	69	0	0	0	0	0	0	0	0	0
oil/gas	United States	Americas	Northern America	Gadsden Steam Plant	2			69	retired	2015	2023	ST	NG					Alabama Power Co [100.0%]	Southern Co [100.0%]	34.0128	-85.9708	exact	Gadsden	Etowah		Alabama	https://www.gem.wiki/Gadsden_Steam_Plant	L100000103779	G100000402403	US8425871071	1	138	138	9	2055	2095	2135	69	69	69	0	0	0	0	0	0	0	0	0
oil/gas	United States	Americas	Northern America	Gaston Steam Plant	1		E.C. Gaston Steam Plant	272	operating	2015	2028	ST	NG/C					Alabama Power Co [50.0%]; Georgia Power Co [50.0%]	Southern Co [50.0%]; Southern Co [50.0%]	33.2442	-86.4581	exact	Wilsonville	Shelby		Alabama	https://www.gem.wiki/Gaston_Steam_Plant	L100000103780	G100000402200	US8425871071	0.5	2965		9	2055	2095	2135	136	136	136	136	136	136	136	136	136	136	136	136
oil/gas	United States	Americas	Northern America	Gaston Steam Plant	2		E.C. Gaston Steam Plant	272	operating	2015	2028	ST	NG/C					Alabama Power Co [50.0%]; Georgia Power Co [50.0%]	Southern Co [50.0%]; Southern Co [50.0%]	33.2442	-86.4581	exact	Wilsonville	Shelby		Alabama	https://www.gem.wiki/Gaston_Steam_Plant	L100000103780	G100000402201	US8425871071	0.5	2965		9	2055	2095	2135	136	136	136	136	136	136	136	136	136	136	136	136
oil/gas	United States	Americas	Northern America	Gaston Steam Plant	3		E.C. Gaston Steam Plant	272	operating	2015	2028	ST	NG/C					Alabama Power Co [50.0%]; Georgia Power Co [50.0%]	Southern Co [50.0%]; Southern Co [50.0%]	33.2442	-86.4581	exact	Wilsonville	Shelby		Alabama	https://www.gem.wiki/Gaston_Steam_Plant	L100000103780	G100000402202	US8425871071	0.5	2965		9	2055	2095	2135	136	136	136	136	136	136	136	136	136	136	136	136
oil/gas	United States	Americas	Northern America	Gaston Steam Plant	ST4		E.C. Gaston Steam Plant	245	operating	2015	2028	ST	NG/C					Alabama Power Co [50.0%]; Georgia Power Co [50.0%]	Southern Co [50.0%]; Southern Co [50.0%]	33.2442	-86.4581	exact	Wilsonville	Shelby		Alabama	https://www.gem.wiki/Gaston_Steam_Plant	L100000103780	G100000402203	US8425871071	0.5	2965		9	2055	2095	2135	122.5	122.5	122.5	122.5	122.5	122.5	122.5	122.5	122.5	122.5	122.5	122.5
oil/gas	United States	Americas	Northern America	Gaston Steam Plant	5		E.C. Gaston Steam Plant	952	announced	2028		ST	NG					Alabama Power Co [50.0%]; Georgia Power Co [50.0%]	Southern Co [50.0%]; Southern Co [50.0%]	33.2442	-86.4581	exact	Wilsonville	Shelby		Alabama	https://www.gem.wiki/Gaston_Steam_Plant	L100000103780	G100000410528	US8425871071	0.5	2965	2965	-4	2068	2108	2148	0	0	0	0	0	0	0	0	476	476	476	476
oil/gas	United States	Americas	Northern America	General Electric Plastic power station	G524			97	operating	1999		CC	NG					Alabama Power Co [100.0%]	Southern Co [100.0%]	32.3102	-86.5254	exact	Burkeville	Lowndes		Alabama	https://www.gem.wiki/General_Electric_Plastic_power_station	L100000401697	G100000402163	US8425871071	1	97	97	25	2039	2079	2119	97	97	97	97	97	97	97	97	97	97	97	97
oil/gas	United States	Americas	Northern America	Greene County Steam Plant	GT3			80	operating	1995		GT	FO/NG					Alabama Power Co [100.0%]	Southern Co [100.0%]	32.6017	-87.7811	exact	Demopolis	Greene		Alabama	https://www.gem.wiki/Greene_County_Steam_Plant	L100000103782	G100000402406	US8425871071	1	1288		29	2035	2075	2115	80	80	80	80	80	80	80	80	80	80	80	80
oil/gas	United States	Americas	Northern America	Greene County Steam Plant	GT4			80	operating	1995		GT	FO/NG					Alabama Power Co [100.0%]	Southern Co [100.0%]	32.6017	-87.7811	exact	Demopolis	Greene		Alabama	https://www.gem.wiki/Greene_County_Steam_Plant	L100000103782	G100000402407	US8425871071	1	1288		29	2035	2075	2115	80	80	80	80	80	80	80	80	80	80	80	80
oil/gas	United States	Americas	Northern America	Greene County Steam Plant	GT5			80	operating	1995		GT	FO/NG					Alabama Power Co [100.0%]	Southern Co [100.0%]	32.6017	-87.7811	exact	Demopolis	Greene		Alabama	https://www.gem.wiki/Greene_County_Steam_Plant	L100000103782	G100000402408	US8425871071	1	1288		29	2035	2075	2115	80	80	80	80	80	80	80	80	80	80	80	80
oil/gas	United States	Americas	Northern America	Greene County Steam Plant	GT6			80	operating	1995		GT	FO/NG					Alabama Power Co [100.0%]	Southern Co [100.0%]	32.6017	-87.7811	exact	Demopolis	Greene		Alabama	https://www.gem.wiki/Greene_County_Steam_Plant	L100000103782	G100000402409	US8425871071	1	1288		29	2035	2075	2115	80	80	80	80	80	80	80	80	80	80	80	80
oil/gas	United States	Americas	Northern America	Greene County Steam Plant	GT7			80	operating	1995		GT	FO/NG					Alabama Power Co [100.0%]	Southern Co [100.0%]	32.6017	-87.7811	exact	Demopolis	Greene		Alabama	https://www.gem.wiki/Greene_County_Steam_Plant	L100000103782	G100000402410	US8425871071	1	1288		29	2035	2075	2115	80	80	80	80	80	80	80	80	80	80	80	80
oil/gas	United States	Americas	Northern America	Greene County Steam Plant	GT10			80	operating	1996		GT	FO/NG					Alabama Power Co [100.0%]	Southern Co [100.0%]	32.6017	-87.7811	exact	Demopolis	Greene		Alabama	https://www.gem.wiki/Greene_County_Steam_Plant	L100000103782	G100000402404	US8425871071	1	1288		28	2036	2076	2116	80	80	80	80	80	80	80	80	80	80	80	80
oil/gas	United States	Americas	Northern America	Greene County Steam Plant	GT2			80	operating	1996		GT	FO/NG					Alabama Power Co [100.0%]	Southern Co [100.0%]	32.6017	-87.7811	exact	Demopolis	Greene		Alabama	https://www.gem.wiki/Greene_County_Steam_Plant	L100000103782	G100000402405	US8425871071	1	1288		28	2036	2076	2116	80	80	80	80	80	80	80	80	80	80	80	80
oil/gas	United States	Americas	Northern America	Greene County Steam Plant	GT8			80	operating	1996		GT	FO/NG					Alabama Power Co [100.0%]	Southern Co [100.0%]	32.6017	-87.7811	exact	Demopolis	Greene		Alabama	https://www.gem.wiki/Greene_County_Steam_Plant	L100000103782	G100000402411	US8425871071	1	1288		28	2036	2076	2116	80	80	80	80	80	80	80	80	80	80	80	80
oil/gas	United States	Americas	Northern America	Greene County Steam Plant	GT9			80	operating	1996		GT	FO/NG					Alabama Power Co [100.0%]	Southern Co [100.0%]	32.6017	-87.7811	exact	Demopolis	Greene		Alabama	https://www.gem.wiki/Greene_County_Steam_Plant	L100000103782	G100000402412	US8425871071	1	1288		28	2036	2076	2116	80	80	80	80	80	80	80	80	80	80	80	80
oil/gas	United States	Americas	Northern America	Greene County Steam Plant	1			299	operating	2016		ST	NG					Alabama Power Co [60.0%]; Mississippi Power Co [40.0%]	Southern Co [60.0%]; Southern Co [40.0%]	32.6017	-87.7811	exact	Demopolis	Greene		Alabama	https://www.gem.wiki/Greene_County_Steam_Plant	L100000103782	G100000402204	US8425871071	0.6	1288		8	2056	2096	2136	179.4	179.4	179.4	179.4	179.4	179.4	179.4	179.4	179.4	179.4	179.4	179.4
oil/gas	United States	Americas	Northern America	Greene County Steam Plant	2			269	operating	2016		ST	NG					Alabama Power Co [60.0%]; Mississippi Power Co [40.0%]	Southern Co [60.0%]; Southern Co [40.0%]	32.6017	-87.7811	exact	Demopolis	Greene		Alabama	https://www.gem.wiki/Greene_County_Steam_Plant	L100000103782	G100000402205	US8425871071	0.6	1288	1288	8	2056	2096	2136	161.4	161.4	161.4	161.4	161.4	161.4	161.4	161.4	161.4	161.4	161.4	161.4
oil/gas	United States	Americas	Northern America	H Allen Franklin Combined Cycle power station	G481			620	operating	2002		CC	NG					Southern Power Co [100.0%]	Southern Co [100.0%]	32.6078	-85.0975	exact	Smiths	Lee		Alabama	https://www.gem.wiki/H_Allen_Franklin_Combined_Cycle_power_station	L100000402286	G100000402166	US8425871071	1	1996		22	2042	2082	2122	620	620	620	620	620	620	620	620	620	620	620	620
oil/gas	United States	Americas	Northern America	H Allen Franklin Combined Cycle power station	G501			688	operating	2002		CC	NG					Southern Power Co [100.0%]	Southern Co [100.0%]	32.6078	-85.0975	exact	Smiths	Lee		Alabama	https://www.gem.wiki/H_Allen_Franklin_Combined_Cycle_power_station	L100000402286	G100000402167	US8425871071	1	1996		22	2042	2082	2122	688	688	688	688	688	688	688	688	688	688	688	688
oil/gas	United States	Americas	Northern America	H Allen Franklin Combined Cycle power station	G100			688	operating	2008		CC	NG					Southern Power Co [100.0%]	Southern Co [100.0%]	32.6078	-85.0975	exact	Smiths	Lee		Alabama	https://www.gem.wiki/H_Allen_Franklin_Combined_Cycle_power_station	L100000402286	G100000402165	US8425871071	1	1996	1996	16	2048	2088	2128	688	688	688	688	688	688	688	688	688	688	688	688
oil/gas	United States	Americas	Northern America	Intercession City power station	P11			148.5	operating	1997		GT	FO					Duke Energy Florida LLC [66.7%]; Georgia Power Co [33.3%]	Duke Energy Corp [66.7%]; Southern Co [33.3%]	28.2628	-81.5486	exact	Intercession City	Osceola		Florida	https://www.gem.wiki/Intercession_City_power_station	L100000401869	G100000414252	US8425871071	0.333	148.5	148.5	27	2037	2077	2117	49.4505	49.4505	49.4505	49.4505	49.4505	49.4505	49.4505	49.4505	49.4505	49.4505	49.4505	49.4505
oil/gas	United States	Americas	Northern America	Jack Watson Generating Plant	4			299	operating	2015	2023	ST	NG					Mississippi Power Co [100.0%]	Southern Co [100.0%]	30.4392	-89.0286	exact	Gulfport	Harrison		Mississippi	https://www.gem.wiki/Jack_Watson_Generating_Plant	L100000104009	G100000403188	US8425871071	1	877		9	2055	2095	2135	299	299	299	299	299	299	299	299	299	299	299	299
oil/gas	United States	Americas	Northern America	Jack Watson Generating Plant	5			578	operating	2015		ST	NG					Mississippi Power Co [100.0%]	Southern Co [100.0%]	30.4392	-89.0286	exact	Gulfport	Harrison		Mississippi	https://www.gem.wiki/Jack_Watson_Generating_Plant	L100000104009	G100000403189	US8425871071	1	877	877	9	2055	2095	2135	578	578	578	578	578	578	578	578	578	578	578	578
oil/gas	United States	Americas	Northern America	McDonough Steam Generating Plant	G104		Atkinson power station/Jack McDonough Steam Generating Plant	922	operating	2011		CC	NG/FO					Georgia Power Co [100.0%]	Southern Co [100.0%]	33.8239	-84.4758	exact	Smyrna	Cobb		Georgia	https://www.gem.wiki/McDonough_Steam_Generating_Plant	L100000103842	G100000402137	US8425871071	1	2766		13	2051	2091	2131	922	922	922	922	922	922	922	922	922	922	922	922
oil/gas	United States	Americas	Northern America	McDonough Steam Generating Plant	G105		Atkinson power station/Jack McDonough Steam Generating Plant	922	operating	2012		CC	NG/FO					Georgia Power Co [100.0%]	Southern Co [100.0%]	33.8239	-84.4758	exact	Smyrna	Cobb		Georgia	https://www.gem.wiki/McDonough_Steam_Generating_Plant	L100000103842	G100000402138	US8425871071	1	2766		12	2052	2092	2132	922	922	922	922	922	922	922	922	922	922	922	922
oil/gas	United States	Americas	Northern America	McDonough Steam Generating Plant	G106		Atkinson power station/Jack McDonough Steam Generating Plant	922	operating	2012		CC	NG/FO					Georgia Power Co [100.0%]	Southern Co [100.0%]	33.8239	-84.4758	exact	Smyrna	Cobb		Georgia	https://www.gem.wiki/McDonough_Steam_Generating_Plant	L100000103842	G100000402139	US8425871071	1	2766	2766	12	2052	2092	2132	922	922	922	922	922	922	922	922	922	922	922	922
oil/gas	United States	Americas	Northern America	McIntosh Combined Cycle Facility	G110			688	operating	2005		CC	NG					Georgia Power Co [100.0%]	Southern Co [100.0%]	32.3478	-81.1817	exact	Rincon	Effingham		Georgia	https://www.gem.wiki/McIntosh_Combined_Cycle_Facility	L100000401979	G100000402001	US8425871071	1	1376		19	2045	2085	2125	688	688	688	688	688	688	688	688	688	688	688	688
oil/gas	United States	Americas	Northern America	McIntosh Combined Cycle Facility	G111			688	operating	2005		CC	NG					Georgia Power Co [100.0%]	Southern Co [100.0%]	32.3478	-81.1817	exact	Rincon	Effingham		Georgia	https://www.gem.wiki/McIntosh_Combined_Cycle_Facility	L100000401979	G100000402002	US8425871071	1	1376	1376	19	2045	2085	2125	688	688	688	688	688	688	688	688	688	688	688	688
oil/gas	United States	Americas	Northern America	McIntosh Steam Plant	CT3			101	operating	1994		GT	NG/FO					Georgia Power Co [100.0%]	Southern Co [100.0%]	32.3563	-81.1684	exact	Rincon	Effingham		Georgia	https://www.gem.wiki/McIntosh_Steam_Plant	L100000103843	G100000402947	US8425871071	1	808		30	2034	2074	2114	101	101	101	101	101	101	101	101	101	101	101	101
oil/gas	United States	Americas	Northern America	McIntosh Steam Plant	CT4			101	operating	1994		GT	NG/FO					Georgia Power Co [100.0%]	Southern Co [100.0%]	32.3563	-81.1684	exact	Rincon	Effingham		Georgia	https://www.gem.wiki/McIntosh_Steam_Plant	L100000103843	G100000402948	US8425871071	1	808		30	2034	2074	2114	101	101	101	101	101	101	101	101	101	101	101	101
oil/gas	United States	Americas	Northern America	McIntosh Steam Plant	CT5			101	operating	1994		GT	NG/FO					Georgia Power Co [100.0%]	Southern Co [100.0%]	32.3563	-81.1684	exact	Rincon	Effingham		Georgia	https://www.gem.wiki/McIntosh_Steam_Plant	L100000103843	G100000402949	US8425871071	1	808		30	2034	2074	2114	101	101	101	101	101	101	101	101	101	101	101	101
oil/gas	United States	Americas	Northern America	McIntosh Steam Plant	CT6			101	operating	1994		GT	NG/FO					Georgia Power Co [100.0%]	Southern Co [100.0%]	32.3563	-81.1684	exact	Rincon	Effingham		Georgia	https://www.gem.wiki/McIntosh_Steam_Plant	L100000103843	G100000402950	US8425871071	1	808		30	2034	2074	2114	101	101	101	101	101	101	101	101	101	101	101	101
oil/gas	United States	Americas	Northern America	McIntosh Steam Plant	CT7			101	operating	1994		GT	NG/FO					Georgia Power Co [100.0%]	Southern Co [100.0%]	32.3563	-81.1684	exact	Rincon	Effingham		Georgia	https://www.gem.wiki/McIntosh_Steam_Plant	L100000103843	G100000402951	US8425871071	1	808		30	2034	2074	2114	101	101	101	101	101	101	101	101	101	101	101	101
oil/gas	United States	Americas	Northern America	McIntosh Steam Plant	CT8			101	operating	1994		GT	NG/FO					Georgia Power Co [100.0%]	Southern Co [100.0%]	32.3563	-81.1684	exact	Rincon	Effingham		Georgia	https://www.gem.wiki/McIntosh_Steam_Plant	L100000103843	G100000402952	US8425871071	1	808		30	2034	2074	2114	101	101	101	101	101	101	101	101	101	101	101	101
oil/gas	United States	Americas	Northern America	McIntosh Steam Plant	CT1			101	operating	1995		GT	NG/FO					Georgia Power Co [100.0%]	Southern Co [100.0%]	32.3563	-81.1684	exact	Rincon	Effingham		Georgia	https://www.gem.wiki/McIntosh_Steam_Plant	L100000103843	G100000402945	US8425871071	1	808		29	2035	2075	2115	101	101	101	101	101	101	101	101	101	101	101	101
oil/gas	United States	Americas	Northern America	McIntosh Steam Plant	CT2			101	operating	1995		GT	NG/FO					Georgia Power Co [100.0%]	Southern Co [100.0%]	32.3563	-81.1684	exact	Rincon	Effingham		Georgia	https://www.gem.wiki/McIntosh_Steam_Plant	L100000103843	G100000402946	US8425871071	1	808	808	29	2035	2075	2115	101	101	101	101	101	101	101	101	101	101	101	101
oil/gas	United States	Americas	Northern America	McManus power station	3A			55.4	operating	1972		GT	FO					Georgia Power Co [100.0%]	Southern Co [100.0%]	31.2136	-81.5462	exact	Brunswick	Glynn		Georgia	https://www.gem.wiki/McManus_power_station	L100000409266	G100000414239	US8425871071	1	558		52	2012	2052	2092	55.4	55.4	55.4	55.4	55.4	55.4	55.4	55.4	55.4	55.4	55.4	55.4
oil/gas	United States	Americas	Northern America	McManus power station	3B			55.4	operating	1972		GT	FO					Georgia Power Co [100.0%]	Southern Co [100.0%]	31.2136	-81.5462	exact	Brunswick	Glynn		Georgia	https://www.gem.wiki/McManus_power_station	L100000409266	G100000414238	US8425871071	1	558		52	2012	2052	2092	55.4	55.4	55.4	55.4	55.4	55.4	55.4	55.4	55.4	55.4	55.4	55.4
oil/gas	United States	Americas	Northern America	McManus power station	3C			55.4	operating	1972		GT	FO					Georgia Power Co [100.0%]	Southern Co [100.0%]	31.2136	-81.5462	exact	Brunswick	Glynn		Georgia	https://www.gem.wiki/McManus_power_station	L100000409266	G100000414237	US8425871071	1	558		52	2012	2052	2092	55.4	55.4	55.4	55.4	55.4	55.4	55.4	55.4	55.4	55.4	55.4	55.4
oil/gas	United States	Americas	Northern America	McManus power station	4A			65.3	operating	1972		GT	FO					Georgia Power Co [100.0%]	Southern Co [100.0%]	31.2136	-81.5462	exact	Brunswick	Glynn		Georgia	https://www.gem.wiki/McManus_power_station	L100000409266	G100000414236	US8425871071	1	558		52	2012	2052	2092	65.3	65.3	65.3	65.3	65.3	65.3	65.3	65.3	65.3	65.3	65.3	65.3
oil/gas	United States	Americas	Northern America	McManus power station	4B			65.3	operating	1972		GT	FO					Georgia Power Co [100.0%]	Southern Co [100.0%]	31.2136	-81.5462	exact	Brunswick	Glynn		Georgia	https://www.gem.wiki/McManus_power_station	L100000409266	G100000414235	US8425871071	1	558		52	2012	2052	2092	65.3	65.3	65.3	65.3	65.3	65.3	65.3	65.3	65.3	65.3	65.3	65.3
oil/gas	United States	Americas	Northern America	McManus power station	4C			65.3	operating	1972		GT	FO					Georgia Power Co [100.0%]	Southern Co [100.0%]	31.2136	-81.5462	exact	Brunswick	Glynn		Georgia	https://www.gem.wiki/McManus_power_station	L100000409266	G100000414234	US8425871071	1	558		52	2012	2052	2092	65.3	65.3	65.3	65.3	65.3	65.3	65.3	65.3	65.3	65.3	65.3	65.3
oil/gas	United States	Americas	Northern America	McManus power station	4D			65.3	operating	1972		GT	FO					Georgia Power Co [100.0%]	Southern Co [100.0%]	31.2136	-81.5462	exact	Brunswick	Glynn		Georgia	https://www.gem.wiki/McManus_power_station	L100000409266	G100000414233	US8425871071	1	558		52	2012	2052	2092	65.3	65.3	65.3	65.3	65.3	65.3	65.3	65.3	65.3	65.3	65.3	65.3
oil/gas	United States	Americas	Northern America	McManus power station	4E			65.3	operating	1972		GT	FO					Georgia Power Co [100.0%]	Southern Co [100.0%]	31.2136	-81.5462	exact	Brunswick	Glynn		Georgia	https://www.gem.wiki/McManus_power_station	L100000409266	G100000414232	US8425871071	1	558		52	2012	2052	2092	65.3	65.3	65.3	65.3	65.3	65.3	65.3	65.3	65.3	65.3	65.3	65.3
oil/gas	United States	Americas	Northern America	McManus power station	4F			65.3	operating	1972		GT	FO					Georgia Power Co [100.0%]	Southern Co [100.0%]	31.2136	-81.5462	exact	Brunswick	Glynn		Georgia	https://www.gem.wiki/McManus_power_station	L100000409266	G100000414231	US8425871071	1	558	558	52	2012	2052	2092	65.3	65.3	65.3	65.3	65.3	65.3	65.3	65.3	65.3	65.3	65.3	65.3
oil/gas	United States	Americas	Northern America	Ratcliffe power plant	1			840	operating	2014		CC	NG					Mississippi Power Co [100.0%]	Southern Co [100.0%]	32.6547	-88.7622	exact	De Kalb	Kemper		Mississippi	https://www.gem.wiki/Ratcliffe_power_plant	L100000402096	G100000402041	US8425871071	1	840	840	10	2054	2094	2134	840	840	840	840	840	840	840	840	840	840	840	840
oil/gas	United States	Americas	Northern America	Robins power station	1			92	operating	1995		GT	NG/FO					Georgia Power Co [100.0%]	Southern Co [100.0%]	32.5792	-83.5822	exact	Robins AFB	Houston		Georgia	https://www.gem.wiki/Robins_power_station	L100000401980	G100000402953	US8425871071	1	184		29	2035	2075	2115	92	92	92	92	92	92	92	92	92	92	92	92
oil/gas	United States	Americas	Northern America	Robins power station	2			92	operating	1995		GT	NG/FO					Georgia Power Co [100.0%]	Southern Co [100.0%]	32.5792	-83.5822	exact	Robins AFB	Houston		Georgia	https://www.gem.wiki/Robins_power_station	L100000401980	G100000402954	US8425871071	1	184	184	29	2035	2075	2115	92	92	92	92	92	92	92	92	92	92	92	92
oil/gas	United States	Americas	Northern America	Rowan power station	1			199	operating	2001		GT	FO/NG					Southern Power Co [100.0%]	Southern Co [100.0%]	35.7314	-80.6019	exact	Salisbury	Rowan		North Carolina	https://www.gem.wiki/Rowan_power_station	L100000402288	G100000403536	US8425871071	1	1191		23	2041	2081	2121	199	199	199	199	199	199	199	199	199	199	199	199
oil/gas	United States	Americas	Northern America	Rowan power station	2			199	operating	2001		GT	FO/NG					Southern Power Co [100.0%]	Southern Co [100.0%]	35.7314	-80.6019	exact	Salisbury	Rowan		North Carolina	https://www.gem.wiki/Rowan_power_station	L100000402288	G100000403537	US8425871071	1	1191		23	2041	2081	2121	199	199	199	199	199	199	199	199	199	199	199	199
oil/gas	United States	Americas	Northern America	Rowan power station	3			199	operating	2001		GT	FO/NG					Southern Power Co [100.0%]	Southern Co [100.0%]	35.7314	-80.6019	exact	Salisbury	Rowan		North Carolina	https://www.gem.wiki/Rowan_power_station	L100000402288	G100000403538	US8425871071	1	1191		23	2041	2081	2121	199	199	199	199	199	199	199	199	199	199	199	199
oil/gas	United States	Americas	Northern America	Rowan power station	G102			594	operating	2003		CC	NG/FO					Southern Power Co [100.0%]	Southern Co [100.0%]	35.7314	-80.6019	exact	Salisbury	Rowan		North Carolina	https://www.gem.wiki/Rowan_power_station	L100000402288	G100000402174	US8425871071	1	1191	1191	21	2043	2083	2123	594	594	594	594	594	594	594	594	594	594	594	594
oil/gas	United States	Americas	Northern America	Tenaska Central Alabama generating station	STG1			927	operating	2003		CC	NG/FO					Alabama Power Co [100.0%]	Southern Co [100.0%]	32.6497	-86.74	exact	Billingsley	Autauga		Alabama	https://www.gem.wiki/Tenaska_Central_Alabama_generating_station	L100000401620	G100000401923	US8425871071	1	927	927	21	2043	2083	2123	927	927	927	927	927	927	927	927	927	927	927	927
oil/gas	United States	Americas	Northern America	Theodore cogeneration facility	G525			317	operating	2000		CC	NG					Alabama Power Co [100.0%]	Southern Co [100.0%]	30.5254	-88.1285	exact	Theodore	Mobile		Alabama	https://www.gem.wiki/Theodore_cogeneration_facility	L100000401698	G100000402168	US8425871071	1	317	317	24	2040	2080	2120	317	317	317	317	317	317	317	317	317	317	317	317
oil/gas	United States	Americas	Northern America	Victor J Daniel Jr power station	3		Plant Daniel	566	operating	2001		CC	NG					Mississippi Power Co [100.0%]	Southern Co [100.0%]	30.5322	-88.5553	exact	Escatawpa	Jackson		Mississippi	https://www.gem.wiki/Victor_J_Daniel_Jr_power_station	L100000402097	G100000402099	US8425871071	1	1132		23	2041	2081	2121	566	566	566	566	566	566	566	566	566	566	566	566
oil/gas	United States	Americas	Northern America	Victor J Daniel Jr power station	4		Plant Daniel	566	operating	2001		CC	NG					Mississippi Power Co [100.0%]	Southern Co [100.0%]	30.5322	-88.5553	exact	Escatawpa	Jackson		Mississippi	https://www.gem.wiki/Victor_J_Daniel_Jr_power_station	L100000402097	G100000402100	US8425871071	1	1132	1132	23	2041	2081	2121	566	566	566	566	566	566	566	566	566	566	566	566
oil/gas	United States	Americas	Northern America	Wansley Plant	G106			620	operating	2002		CC	NG					Southern Power Co [100.0%]	Southern Co [100.0%]	33.4064	-85.037	exact	Franklin	Heard		Georgia	https://www.gem.wiki/Wansley_Plant	L100000103848	G100000401986	US8425871071	1	3144		22	2042	2082	2122	620	620	620	620	620	620	620	620	620	620	620	620
oil/gas	United States	Americas	Northern America	Wansley Plant	G107			620	operating	2002		CC	NG					Southern Power Co [100.0%]	Southern Co [100.0%]	33.4064	-85.037	exact	Franklin	Heard		Georgia	https://www.gem.wiki/Wansley_Plant	L100000103848	G100000401987	US8425871071	1	3144	3144	22	2042	2082	2122	620	620	620	620	620	620	620	620	620	620	620	620
oil/gas	United States	Americas	Northern America	Wansley power station	5A			52.8	retired	1980	2022	GT	FO					Georgia Power Co [53.5%]; Oglethorpe Power Corp [30.0%]; Municipal Electric Authority of Georgia [15.1%]; Dalton Utilities [1.4%]	Southern Co [53.5%]; Municipal Electric Authority of Georgia [15.1%]	33.4134	-85.0323	exact	Roopville	Heard		Georgia	https://www.gem.wiki/Wansley_power_station	L100000409254	G100000414179	US8425871071	0.535	52.8	52.8	44	2020	2060	2100	28.248	28.248	0	0	0	0	0	0	0	0	0	0
oil/gas	United States	Americas	Northern America	Washington County cogeneration facility (AL)	G523			123	operating	1999		CC	NG					Alabama Power Co [100.0%]	Southern Co [100.0%]	31.2504	-88.0156	exact	McIntosh	Washington		Alabama	https://www.gem.wiki/Washington_County_cogeneration_facility_(AL)	L100000401699	G100000402162	US8425871071	1	123	123	25	2039	2079	2119	123	123	123	123	123	123	123	123	123	123	123	123
oil/gas	United States	Americas	Northern America	Wilson power station	5A			52.5	operating	1972		GT	FO					Georgia Power Co [100.0%]	Southern Co [100.0%]	33.1377	-81.7483	exact	Waynesboro	Burke		Georgia	https://www.gem.wiki/Wilson_Station	L100000409274	G100000414112	US8425871071	1	315		52	2012	2052	2092	52.5	52.5	52.5	52.5	52.5	52.5	52.5	52.5	52.5	52.5	52.5	52.5
oil/gas	United States	Americas	Northern America	Wilson power station	5B			52.5	operating	1972		GT	FO					Georgia Power Co [100.0%]	Southern Co [100.0%]	33.1377	-81.7483	exact	Waynesboro	Burke		Georgia	https://www.gem.wiki/Wilson_Station	L100000409274	G100000414111	US8425871071	1	315		52	2012	2052	2092	52.5	52.5	52.5	52.5	52.5	52.5	52.5	52.5	52.5	52.5	52.5	52.5
oil/gas	United States	Americas	Northern America	Wilson power station	5C			52.5	operating	1972		GT	FO					Georgia Power Co [100.0%]	Southern Co [100.0%]	33.1377	-81.7483	exact	Waynesboro	Burke		Georgia	https://www.gem.wiki/Wilson_Station	L100000409274	G100000414110	US8425871071	1	315		52	2012	2052	2092	52.5	52.5	52.5	52.5	52.5	52.5	52.5	52.5	52.5	52.5	52.5	52.5
oil/gas	United States	Americas	Northern America	Wilson power station	5D			52.5	operating	1973		GT	FO					Georgia Power Co [100.0%]	Southern Co [100.0%]	33.1377	-81.7483	exact	Waynesboro	Burke		Georgia	https://www.gem.wiki/Wilson_Station	L100000409274	G100000414109	US8425871071	1	315		51	2013	2053	2093	52.5	52.5	52.5	52.5	52.5	52.5	52.5	52.5	52.5	52.5	52.5	52.5
oil/gas	United States	Americas	Northern America	Wilson power station	5E			52.5	operating	1973		GT	FO					Georgia Power Co [100.0%]	Southern Co [100.0%]	33.1377	-81.7483	exact	Waynesboro	Burke		Georgia	https://www.gem.wiki/Wilson_Station	L100000409274	G100000414108	US8425871071	1	315		51	2013	2053	2093	52.5	52.5	52.5	52.5	52.5	52.5	52.5	52.5	52.5	52.5	52.5	52.5
oil/gas	United States	Americas	Northern America	Wilson power station	5F			52.5	operating	1973		GT	FO					Georgia Power Co [100.0%]	Southern Co [100.0%]	33.1377	-81.7483	exact	Waynesboro	Burke		Georgia	https://www.gem.wiki/Wilson_power_station	L100000409274	G100000414107	US8425871071	1	315	315	51	2013	2053	2093	52.5	52.5	52.5	52.5	52.5	52.5	52.5	52.5	52.5	52.5	52.5	52.5
oil/gas	United States	Americas	Northern America	Yates Steam Generating Plant	6			404	operating	2015		ST	NG					Georgia Power Co [100.0%]	Southern Co [100.0%]	33.4622	-84.8986	exact	Newnan	Coweta		Georgia	https://www.gem.wiki/Yates_Steam_Generating_Plant	L100000103850	G100000402955	US8425871071	1	808		9	2055	2095	2135	404	404	404	404	404	404	404	404	404	404	404	404
oil/gas	United States	Americas	Northern America	Yates Steam Generating Plant	7			404	operating	2015		ST	NG					Georgia Power Co [100.0%]	Southern Co [100.0%]	33.4622	-84.8986	exact	Newnan	Coweta		Georgia	https://www.gem.wiki/Yates_Steam_Generating_Plant	L100000103850	G100000402956	US8425871071	1	808	808	9	2055	2095	2135	404	404	404	404	404	404	404	404	404	404	404	404
solar	United States	Americas	Northern America	Campo Verde Solar				147	operating	2013		PV						Southern Company; Turner Renewable Energy		32.7533	-115.726	exact		Imperial County		California	https://gem.wiki/Campo_Verde_Solar	L804482	G805153	US8425871071	0.5	147	147	11	2053	2093	2133	73.5	73.5	73.5	73.5	73.5	73.5	73.5	73.5	73.5	73.5	73.5	73.5
solar	United States	Americas	Northern America	Cimarron Solar Facility				31	operating	2010		PV						Southern Company; Turner Renewable Energy		36.4681	-104.636	exact		Colfax County		New Mexico	https://gem.wiki/Cimarron_Solar_Facility	L804483	G805154	US8425871071	0.5	31	31	14	2050	2090	2130	15.5	15.5	15.5	15.5	15.5	15.5	15.5	15.5	15.5	15.5	15.5	15.5
wind	China	Asia	Eastern Asia	Guizhou Tongzi Huanglianba wind farm		贵州桐梓黄莲坝风电场		50	operating	2020		onshore						China Power Construction New Energy Southern Co. [majority]; Beijing Tianrun New Energy Investment CO LTD		27.0001	107	approximate	Huanglian Xiang	Tongzi County	Zunyi Municipality	Guizhou	https://gem.wiki/Guizhou_Tongzi_Huanglianba_wind_farm	L903393	G904171	US8425871071	0.5	50	50	4	2060	2100	2140	25	25	25	25	25	25	25	25	25	25	25	25
wind	United States	Americas	Northern America	Ruso wind farm	1			205	shelved			onshore						Southern Company		48.3088	-101.515	approximate		Ward County		North Dakota	https://gem.wiki/Ruso_wind_farm	L907434	G910024	US8425871071	1	205	205	-99	40	80	120	0	0	0	0	0	0	0	0	0	0	0	0
																																					TOTAL Capacity	33812.7	33812.7	32765.8	33401.8	33151.8	33151.8	33151.8	32901.8	29320.4	29320.4	29320.4	29320.4
																																					Coal	11199.7	11199.7	10181	10181	9931.04	9931.04	9931.04	9681.04	5273.69	5273.69	5273.69	5273.69
																																					Oil&Gas	22499	22499	22470.8	23106.8	23106.8	23106.8	23106.8	23106.8	23932.8	23932.8	23932.8	23932.8
																																					Fossil fuel	33698.7	33698.7	32651.8	33287.8	33037.8	33037.8	33037.8	32787.8	29206.4	29206.4	29206.4	29206.4
																																					Renewables	114	114	114	114	364	364	364	614	5021.35	5021.35	5021.35	5021.35
																																					Oil	9902.7	9902.7	9874.45	9874.45	9874.45	9874.45	9874.45	9874.45	9874.45	9874.45	9874.45	9874.45
																																					Gas	21548.3	21548.3	21548.3	22184.3	22184.3	22184.3	22184.3	22184.3	23010.3	23010.3	23010.3	23010.3
																																					Nuclear	0	0	0	0	0	0	0	0	0	0	0	0
																																					Wind	25	25	25	25	25	25	25	25	25	25	25	25
																																					solar	89	89	89	89	89	89	89	89	89	89	89	89
[truncated: 19 more columns]

## Sheet: SouthernCo_fossilfuel
Type	Country/area	Region	Subregion	Plant / Project name	Unit / Phase name	Plant / Project name (local)	Plant / Project name (other)	Capacity (MW)	Status	Start year	Retired year	Technology	Fuel	Country/area 1 (hydropower only)	Country/area 2 (hydropower only)	Country/area 1 Capacity (MW) (hydropower only)	Country/area 2 Capacity (MW) (hydropower only)	Owner	Parent	Latitude	Longitude	Location accuracy	City	Local area (taluk, county)	Major area (prefecture, district)	Subnational unit (state, province)	GEM.Wiki URL	GEM location ID	GEM unit/phase ID	CompISIN	Ownership	Plant capacity	Plant capacity	Age	Reinvestment year	Reinvestment year	Reinvestment year	Coal capacity factor 2020	Gas capacity factor 2020	Oil capacity factor 2020	Coal capacity factor 2021	Gas capacity factor 2021	Oil capacity factor 2021	Coal capacity factor 2022	Gas capacity factor 2022	Oil capacity factor 2022	Coal capacity factor 2023	Gas capacity factor 2023	Oil capacity factor 2023
coal	United States	Americas	Northern America	Barry Steam Plant	Unit 4			403.7	operating	1969	2028	subcritical	bituminous					Alabama Power [100%]	Southern Co [100.0%]	31.0066	-88.0088	exact	Bucks	Mobile		Alabama	https://www.gem.wiki/Barry_Steam_Plant	L100000103776	G100000100647	US8425871071	1	11077.5		55	2009	2049	2089	0.357393	0	0	0.504792	0	0	0.521917	0	0	0.514046	0	0
coal	United States	Americas	Northern America	Barry Steam Plant	Unit 5			788.8	operating	1971	2028	supercritical	bituminous					Alabama Power [100%]	Southern Co [100.0%]	31.0066	-88.0088	exact	Bucks	Mobile		Alabama	https://www.gem.wiki/Barry_Steam_Plant	L100000103776	G100000100648	US8425871071	1	11077.5	11077.5	53	2011	2051	2091	0.357393	0	0	0.504792	0	0	0.521917	0	0	0.514046	0	0
coal	United States	Americas	Northern America	Daniel Generating Plant	Unit 1		Victor J. Daniel Generating Plant	500	operating	1977	2024	subcritical	bituminous					Florida Power & Light [50%]; Mississippi Power [50%]	NextEra Energy Inc [50.0%]; Southern Co [50.0%]	30.5327	-88.5571	exact	Escatawpa	Jackson		Mississippi	https://www.gem.wiki/Daniel_Generating_Plant	L100000104008	G100000101965	US8425871071	0.5	3000		47	2017	2057	2097	0.357393	0	0	0.504792	0	0	0.521917	0	0	0.514046	0	0
coal	United States	Americas	Northern America	Daniel Generating Plant	Unit 2		Victor J. Daniel Generating Plant	500	operating	1981	2027	subcritical	bituminous					Florida Power & Light [50%]; Mississippi Power [50%]	NextEra Energy Inc [50.0%]; Southern Co [50.0%]	30.5327	-88.5571	exact	Escatawpa	Jackson		Mississippi	https://www.gem.wiki/Daniel_Generating_Plant	L100000104008	G100000101966	US8425871071	0.5	3000	3000	43	2021	2061	2101	0.357393	0	0	0.504792	0	0	0.521917	0	0	0.514046	0	0
coal	United States	Americas	Northern America	Gaston Steam Plant	Unit 5		EC Gaston power station	952	operating	1974	2028	supercritical	bituminous					Alabama Power [100%]	Southern Co [100.0%]	33.2432	-86.4589	exact	Wilsonville	Shelby		Alabama	https://www.gem.wiki/Gaston_Steam_Plant	L100000103780	G100000102959	US8425871071	1	8895	8895	50	2014	2054	2094	0.357393	0	0	0.504792	0	0	0.521917	0	0	0.514046	0	0
coal	United States	Americas	Northern America	Miller Steam Plant	Unit 1		James H. Miller Jr. Steam Plant	705.5	operating	1978		subcritical	subbituminous					Alabama Power [91%]; PowerSouth Energy Cooperative [8%]	Southern Co [91.8%]; PowerSouth Energy Cooperative [8.2%]	33.6332	-87.0598	exact	West Jefferson	Jefferson		Alabama	https://www.gem.wiki/Miller_Steam_Plant	L100000103783	G100000106922	US8425871071	0.918	8466		46	2018	2058	2098	0.357393	0	0	0.504792	0	0	0.521917	0	0	0.514046	0	0
coal	United States	Americas	Northern America	Miller Steam Plant	Unit 2		James H. Miller Jr. Steam Plant	705.5	operating	1985		subcritical	subbituminous					Alabama Power [91%]; PowerSouth Energy Cooperative [8%]	Southern Co [91.8%]; PowerSouth Energy Cooperative [8.2%]	33.6332	-87.0598	exact	West Jefferson	Jefferson		Alabama	https://www.gem.wiki/Miller_Steam_Plant	L100000103783	G100000106923	US8425871071	0.918	8466		39	2025	2065	2105	0.357393	0	0	0.504792	0	0	0.521917	0	0	0.514046	0	0
coal	United States	Americas	Northern America	Miller Steam Plant	Unit 3		James H. Miller Jr. Steam Plant	705.5	operating	1989		subcritical	subbituminous					Alabama Power [100%]	Southern Co [100.0%]	33.6332	-87.0598	exact	West Jefferson	Jefferson		Alabama	https://www.gem.wiki/Miller_Steam_Plant	L100000103783	G100000106924	US8425871071	1	8466		35	2029	2069	2109	0.357393	0	0	0.504792	0	0	0.521917	0	0	0.514046	0	0
coal	United States	Americas	Northern America	Miller Steam Plant	Unit 4		James H. Miller Jr. Steam Plant	705.5	operating	1991		subcritical	subbituminous					Alabama Power [100%]	Southern Co [100.0%]	33.6332	-87.0598	exact	West Jefferson	Jefferson		Alabama	https://www.gem.wiki/Miller_Steam_Plant	L100000103783	G100000106925	US8425871071	1	8466	8466	33	2031	2071	2111	0.357393	0	0	0.504792	0	0	0.521917	0	0	0.514046	0	0
coal	United States	Americas	Northern America	Plant Bowen	Unit 1			805.8	operating	1971	2028	supercritical	bituminous					Georgia Power [100%]	Southern Co [100.0%]	34.126	-84.9207	exact	Taylorsville	Bartow		Georgia	https://www.gem.wiki/Plant_Bowen	L100000103845	G100000108023	US8425871071	1	10495.8		53	2011	2051	2091	0.357393	0	0	0.504792	0	0	0.521917	0	0	0.514046	0	0
coal	United States	Americas	Northern America	Plant Bowen	Unit 2			788.8	operating	1972	2028	supercritical	bituminous					Georgia Power [100%]	Southern Co [100.0%]	34.126	-84.9207	exact	Taylorsville	Bartow		Georgia	https://www.gem.wiki/Plant_Bowen	L100000103845	G100000108024	US8425871071	1	10495.8		52	2012	2052	2092	0.357393	0	0	0.504792	0	0	0.521917	0	0	0.514046	0	0
coal	United States	Americas	Northern America	Plant Bowen	Unit 3			952	operating	1974	2035	supercritical	bituminous					Georgia Power [100%]	Southern Co [100.0%]	34.126	-84.9207	exact	Taylorsville	Bartow		Georgia	https://www.gem.wiki/Plant_Bowen	L100000103845	G100000108025	US8425871071	1	10495.8		50	2014	2054	2094	0.357393	0	0	0.504792	0	0	0.521917	0	0	0.514046	0	0
coal	United States	Americas	Northern America	Plant Bowen	Unit 4			952	operating	1975	2035	supercritical	bituminous					Georgia Power [100%]	Southern Co [100.0%]	34.126	-84.9207	exact	Taylorsville	Bartow		Georgia	https://www.gem.wiki/Plant_Bowen	L100000103845	G100000108026	US8425871071	1	10495.8	10495.8	49	2015	2055	2095	0.357393	0	0	0.504792	0	0	0.521917	0	0	0.514046	0	0
coal	United States	Americas	Northern America	Red Hills Generation Facility	Unit 1			513.7	operating	2001		subcritical	lignite					S E Choctaw [100%]	Southern Co [100.0%]	33.3762	-89.2185	exact	Red Hills	Choctaw		Mississippi	https://www.gem.wiki/Red_Hills_Generation_Facility	L100000104012	G100000108505	US8425871071	1	1541.1	1541.1	23	2041	2081	2121	0.357393	0	0	0.504792	0	0	0.521917	0	0	0.514046	0	0
coal	United States	Americas	Northern America	Scherer Steam Generating Station	Unit 1			891	operating	1982		subcritical	subbituminous					other unknown/mixed entity types [1%]; Oglethorpe Power [60%]; Municipal Electric Authority of Georgia [30%]; Georgia Power [8%]	Oglethorpe Power [60.0%]; Municipal Electric Authority of Georgia [30.2%]; Southern Co [8.4%]; other unknown/mixed entity types [1.4%]	33.0603	-83.8069	exact	Juliette	Monroe		Georgia	https://www.gem.wiki/Scherer_Steam_Generating_Station	L100000103847	G100000108869	US8425871071	0.084	8019		42	2022	2062	2102	0.357393	0	0	0.504792	0	0	0.521917	0	0	0.514046	0	0
coal	United States	Americas	Northern America	Scherer Steam Generating Station	Unit 2			891	operating	1984		subcritical	subbituminous					Municipal Electric Authority of Georgia [30%]; Oglethorpe Power [60%]; Georgia Power [8%]; other unknown/mixed entity types [1%]	Oglethorpe Power [60.0%]; Municipal Electric Authority of Georgia [30.2%]; Southern Co [8.4%]; other unknown/mixed entity types [1.4%]	33.0603	-83.8069	exact	Juliette	Monroe		Georgia	https://www.gem.wiki/Scherer_Steam_Generating_Station	L100000103847	G100000108870	US8425871071	0.084	8019		40	2024	2064	2104	0.357393	0	0	0.504792	0	0	0.521917	0	0	0.514046	0	0
coal	United States	Americas	Northern America	Scherer Steam Generating Station	Unit 3			891	operating	1987	2028	subcritical	subbituminous					Florida Power & Light [25%]; Georgia Power [75%]	Southern Co [75.0%]; NextEra Energy Inc [25.0%]	33.0603	-83.8069	exact	Juliette	Monroe		Georgia	https://www.gem.wiki/Scherer_Steam_Generating_Station	L100000103847	G100000108871	US8425871071	0.75	8019	8019	37	2027	2067	2107	0.357393	0	0	0.504792	0	0	0.521917	0	0	0.514046	0	0
coal	United States	Americas	Northern America	Wansley Plant	Unit 1			952	retired	1976	2022	supercritical	bituminous					Oglethorpe Power [30%]; Municipal Electric Authority of Georgia [15%]; Georgia Power [53%]; other unknown/mixed entity types [1%]	Southern Co [53.5%]; Oglethorpe Power [30.0%]; Municipal Electric Authority of Georgia [15.1%]; other unknown/mixed entity types [1.4%]	33.4127	-85.0339	exact	Roopville	Heard		Georgia	https://www.gem.wiki/Wansley_Plant	L100000103848	G100000110728	US8425871071	0.535	9432		48	2016	2056	2096	0.357393	0	0	0.504792	0	0	0.521917	0	0	0.514046	0	0
coal	United States	Americas	Northern America	Wansley Plant	Unit 2			952	retired	1978	2022	supercritical	bituminous					Oglethorpe Power [30%]; Municipal Electric Authority of Georgia [15%]; Georgia Power [53%]; other unknown/mixed entity types [1%]	Southern Co [53.5%]; Oglethorpe Power [30.0%]; Municipal Electric Authority of Georgia [15.1%]; other unknown/mixed entity types [1.4%]	33.4127	-85.0339	exact	Roopville	Heard		Georgia	https://www.gem.wiki/Wansley_Plant	L100000103848	G100000110729	US8425871071	0.535	9432	9432	46	2018	2058	2098	0.357393	0	0	0.504792	0	0	0.521917	0	0	0.514046	0	0
oil/gas	United States	Americas	Northern America	Barry Steam Plant	G521		James M. Barry Electric Generating Plant	535	operating	2000		CC	NG					Alabama Power Co [100.0%]	Southern Co [100.0%]	31.0069	-88.0103	exact	Bucks	Mobile		Alabama	https://www.gem.wiki/Barry_Steam_Plant	L100000103776	G100000401686	US8425871071	1	11077.5		24	2040	2080	2120	0	0.513173	0	0	0.527498	0	0	0.510918	0	0	0.464711	0
oil/gas	United States	Americas	Northern America	Barry Steam Plant	G522		James M. Barry Electric Generating Plant	535	operating	2000		CC	NG					Alabama Power Co [100.0%]	Southern Co [100.0%]	31.0069	-88.0103	exact	Bucks	Mobile		Alabama	https://www.gem.wiki/Barry_Steam_Plant	L100000103776	G100000401687	US8425871071	1	11077.5		24	2040	2080	2120	0	0.513173	0	0	0.527498	0	0	0.510918	0	0	0.464711	0
oil/gas	United States	Americas	Northern America	Barry Steam Plant	1		James M. Barry Electric Generating Plant	153	operating	2015		ST	NG					Alabama Power Co [100.0%]	Southern Co [100.0%]	31.0069	-88.0103	exact	Bucks	Mobile		Alabama	https://www.gem.wiki/Barry_Steam_Plant	L100000103776	G100000402400	US8425871071	1	11077.5		9	2055	2095	2135	0	0.513173	0	0	0.527498	0	0	0.510918	0	0	0.464711	0
oil/gas	United States	Americas	Northern America	Barry Steam Plant	2		James M. Barry Electric Generating Plant	153	operating	2015		ST	NG					Alabama Power Co [100.0%]	Southern Co [100.0%]	31.0069	-88.0103	exact	Bucks	Mobile		Alabama	https://www.gem.wiki/Barry_Steam_Plant	L100000103776	G100000402401	US8425871071	1	11077.5		9	2055	2095	2135	0	0.513173	0	0	0.527498	0	0	0.510918	0	0	0.464711	0
oil/gas	United States	Americas	Northern America	Barry Steam Plant	G523		James M. Barry Electric Generating Plant	774	operating	2023		CC	NG					Alabama Power Co [100.0%]	Southern Co [100.0%]	31.0069	-88.0103	exact	Bucks	Mobile		Alabama	https://www.gem.wiki/Barry_Steam_Plant	L100000103776	G100000409443	US8425871071	1	11077.5		1	2063	2103	2143	0	0.513173	0	0	0.527498	0	0	0.510918	0	0	0.464711	0
oil/gas	United States	Americas	Northern America	Barry Steam Plant	4		James M. Barry Electric Generating Plant	350	pre-construction	2028		ST	NG					Alabama Power Co [100.0%]	Southern Co [100.0%]	31.0069	-88.0103	exact	Bucks	Mobile		Alabama	https://www.gem.wiki/Barry_Steam_Plant	L100000103776	G100000410538	US8425871071	1	11077.5	11077.5	-4	2068	2108	2148	0	0.513173	0	0	0.527498	0	0	0.510918	0	0	0.464711	0
oil/gas	United States	Americas	Northern America	Chevron Oil power station	5			101	operating	1994		GT	NG					Mississippi Power Co [100.0%]	Southern Co [100.0%]	30.34	-88.4919	exact	Pascagoula	Jackson		Mississippi	https://www.gem.wiki/Chevron_Oil_power_station	L100000402094	G100000403187	US8425871071	1	303	303	30	2034	2074	2114	0	0.513173	0	0	0.527498	0	0	0.510918	0	0	0.464711	0
oil/gas	United States	Americas	Northern America	Cleveland County generating facility	1			184	operating	2012		GT	NG/FO					Southern Power Co [100.0%]	Southern Co [100.0%]	35.1705	-81.4167	exact	Kings Mountain	Cleveland		North Carolina	https://www.gem.wiki/Cleveland_County_generating_facility	L100000402282	G100000403518	US8425871071	1	2208		12	2052	2092	2132	0	0.513173	0	0	0.527498	0	0	0.510918	0	0	0.464711	0
oil/gas	United States	Americas	Northern America	Cleveland County generating facility	2			184	operating	2012		GT	NG/FO					Southern Power Co [100.0%]	Southern Co [100.0%]	35.1705	-81.4167	exact	Kings Mountain	Cleveland		North Carolina	https://www.gem.wiki/Cleveland_County_generating_facility	L100000402282	G100000403519	US8425871071	1	2208		12	2052	2092	2132	0	0.513173	0	0	0.527498	0	0	0.510918	0	0	0.464711	0
oil/gas	United States	Americas	Northern America	Cleveland County generating facility	3			184	operating	2012		GT	NG/FO					Southern Power Co [100.0%]	Southern Co [100.0%]	35.1705	-81.4167	exact	Kings Mountain	Cleveland		North Carolina	https://www.gem.wiki/Cleveland_County_generating_facility	L100000402282	G100000403520	US8425871071	1	2208		12	2052	2092	2132	0	0.513173	0	0	0.527498	0	0	0.510918	0	0	0.464711	0
oil/gas	United States	Americas	Northern America	Cleveland County generating facility	4			184	operating	2012		GT	NG/FO					Southern Power Co [100.0%]	Southern Co [100.0%]	35.1705	-81.4167	exact	Kings Mountain	Cleveland		North Carolina	https://www.gem.wiki/Cleveland_County_generating_facility	L100000402282	G100000403521	US8425871071	1	2208	2208	12	2052	2092	2132	0	0.513173	0	0	0.527498	0	0	0.510918	0	0	0.464711	0
oil/gas	United States	Americas	Northern America	Dahlberg power station	1			92	operating	2000		GT	NG/FO					Southern Power Co [100.0%]	Southern Co [100.0%]	34.0423	-83.3977	exact	Nicholson	Jackson		Georgia	https://www.gem.wiki/Dahlberg_power_station	L100000402283	G100000403522	US8425871071	1	2760		24	2040	2080	2120	0	0.513173	0	0	0.527498	0	0	0.510918	0	0	0.464711	0
oil/gas	United States	Americas	Northern America	Dahlberg power station	2			92	operating	2000		GT	NG/FO					Southern Power Co [100.0%]	Southern Co [100.0%]	34.0423	-83.3977	exact	Nicholson	Jackson		Georgia	https://www.gem.wiki/Dahlberg_power_station	L100000402283	G100000403524	US8425871071	1	2760		24	2040	2080	2120	0	0.513173	0	0	0.527498	0	0	0.510918	0	0	0.464711	0
oil/gas	United States	Americas	Northern America	Dahlberg power station	3			92	operating	2000		GT	NG/FO					Southern Power Co [100.0%]	Southern Co [100.0%]	34.0423	-83.3977	exact	Nicholson	Jackson		Georgia	https://www.gem.wiki/Dahlberg_power_station	L100000402283	G100000403525	US8425871071	1	2760		24	2040	2080	2120	0	0.513173	0	0	0.527498	0	0	0.510918	0	0	0.464711	0
oil/gas	United States	Americas	Northern America	Dahlberg power station	4			92	operating	2000		GT	NG/FO					Southern Power Co [100.0%]	Southern Co [100.0%]	34.0423	-83.3977	exact	Nicholson	Jackson		Georgia	https://www.gem.wiki/Dahlberg_power_station	L100000402283	G100000403526	US8425871071	1	2760		24	2040	2080	2120	0	0.513173	0	0	0.527498	0	0	0.510918	0	0	0.464711	0
oil/gas	United States	Americas	Northern America	Dahlberg power station	5			92	operating	2000		GT	NG/FO					Southern Power Co [100.0%]	Southern Co [100.0%]	34.0423	-83.3977	exact	Nicholson	Jackson		Georgia	https://www.gem.wiki/Dahlberg_power_station	L100000402283	G100000403527	US8425871071	1	2760		24	2040	2080	2120	0	0.513173	0	0	0.527498	0	0	0.510918	0	0	0.464711	0
oil/gas	United States	Americas	Northern America	Dahlberg power station	6			92	operating	2000		GT	NG/FO					Southern Power Co [100.0%]	Southern Co [100.0%]	34.0423	-83.3977	exact	Nicholson	Jackson		Georgia	https://www.gem.wiki/Dahlberg_power_station	L100000402283	G100000403528	US8425871071	1	2760		24	2040	2080	2120	0	0.513173	0	0	0.527498	0	0	0.510918	0	0	0.464711	0
oil/gas	United States	Americas	Northern America	Dahlberg power station	7			92	operating	2000		GT	NG/FO					Southern Power Co [100.0%]	Southern Co [100.0%]	34.0423	-83.3977	exact	Nicholson	Jackson		Georgia	https://www.gem.wiki/Dahlberg_power_station	L100000402283	G100000403529	US8425871071	1	2760		24	2040	2080	2120	0	0.513173	0	0	0.527498	0	0	0.510918	0	0	0.464711	0
oil/gas	United States	Americas	Northern America	Dahlberg power station	8			92	operating	2000		GT	NG/FO					Southern Power Co [100.0%]	Southern Co [100.0%]	34.0423	-83.3977	exact	Nicholson	Jackson		Georgia	https://www.gem.wiki/Dahlberg_power_station	L100000402283	G100000403530	US8425871071	1	2760		24	2040	2080	2120	0	0.513173	0	0	0.527498	0	0	0.510918	0	0	0.464711	0
oil/gas	United States	Americas	Northern America	Dahlberg power station	9			92	operating	2001		GT	NG/FO					Southern Power Co [100.0%]	Southern Co [100.0%]	34.0423	-83.3977	exact	Nicholson	Jackson		Georgia	https://www.gem.wiki/Dahlberg_power_station	L100000402283	G100000403531	US8425871071	1	2760		23	2041	2081	2121	0	0.513173	0	0	0.527498	0	0	0.510918	0	0	0.464711	0
oil/gas	United States	Americas	Northern America	Dahlberg power station	10			92	operating	2001		GT	NG/FO					Southern Power Co [100.0%]	Southern Co [100.0%]	34.0423	-83.3977	exact	Nicholson	Jackson		Georgia	https://www.gem.wiki/Dahlberg_power_station	L100000402283	G100000403523	US8425871071	1	2760	2760	23	2041	2081	2121	0	0.513173	0	0	0.527498	0	0	0.510918	0	0	0.464711	0
oil/gas	United States	Americas	Northern America	E B Harris Electric generating plant	G103			652	operating	2003		CC	NG					Southern Power Co [100.0%]	Southern Co [100.0%]	32.3814	-86.5744	exact	Autaugaville	Autauga		Alabama	https://www.gem.wiki/E_B_Harris_Electric_generating_plant	L100000402284	G100000402182	US8425871071	1	3912		21	2043	2083	2123	0	0.513173	0	0	0.527498	0	0	0.510918	0	0	0.464711	0
oil/gas	United States	Americas	Northern America	E B Harris Electric generating plant	G104			652	operating	2003		CC	NG					Southern Power Co [100.0%]	Southern Co [100.0%]	32.3814	-86.5744	exact	Autaugaville	Autauga		Alabama	https://www.gem.wiki/E_B_Harris_Electric_generating_plant	L100000402284	G100000402183	US8425871071	1	3912	3912	21	2043	2083	2123	0	0.513173	0	0	0.527498	0	0	0.510918	0	0	0.464711	0
oil/gas	United States	Americas	Northern America	Edward L. Addison generating plant	712			175	operating	2000		GT	NG/FO					Southern Power Co [100.0%]	Southern Co [100.0%]	32.9111	-84.3064	exact	Thomaston	Upson		Georgia	https://www.gem.wiki/Edward_L._Addison_generating_plant	L100000402285	G100000403532	US8425871071	1	2100		24	2040	2080	2120	0	0.513173	0	0	0.527498	0	0	0.510918	0	0	0.464711	0
oil/gas	United States	Americas	Northern America	Edward L. Addison generating plant	713			175	operating	2000		GT	NG/FO					Southern Power Co [100.0%]	Southern Co [100.0%]	32.9111	-84.3064	exact	Thomaston	Upson		Georgia	https://www.gem.wiki/Edward_L._Addison_generating_plant	L100000402285	G100000403533	US8425871071	1	2100		24	2040	2080	2120	0	0.513173	0	0	0.527498	0	0	0.510918	0	0	0.464711	0
oil/gas	United States	Americas	Northern America	Edward L. Addison generating plant	714			175	operating	2000		GT	NG/FO					Southern Power Co [100.0%]	Southern Co [100.0%]	32.9111	-84.3064	exact	Thomaston	Upson		Georgia	https://www.gem.wiki/Edward_L._Addison_generating_plant	L100000402285	G100000403534	US8425871071	1	2100		24	2040	2080	2120	0	0.513173	0	0	0.527498	0	0	0.510918	0	0	0.464711	0
oil/gas	United States	Americas	Northern America	Edward L. Addison generating plant	715			175	operating	2000		GT	NG/FO					Southern Power Co [100.0%]	Southern Co [100.0%]	32.9111	-84.3064	exact	Thomaston	Upson		Georgia	https://www.gem.wiki/Edward_L._Addison_generating_plant	L100000402285	G100000403535	US8425871071	1	2100	2100	24	2040	2080	2120	0	0.513173	0	0	0.527498	0	0	0.510918	0	0	0.464711	0
oil/gas	United States	Americas	Northern America	Gadsden Steam Plant	1			69	retired	2015	2023	ST	NG					Alabama Power Co [100.0%]	Southern Co [100.0%]	34.0128	-85.9708	exact	Gadsden	Etowah		Alabama	https://www.gem.wiki/Gadsden_Steam_Plant	L100000103779	G100000402402	US8425871071	1	414		9	2055	2095	2135	0	0.513173	0	0	0.527498	0	0	0.510918	0	0	0.464711	0
oil/gas	United States	Americas	Northern America	Gadsden Steam Plant	2			69	retired	2015	2023	ST	NG					Alabama Power Co [100.0%]	Southern Co [100.0%]	34.0128	-85.9708	exact	Gadsden	Etowah		Alabama	https://www.gem.wiki/Gadsden_Steam_Plant	L100000103779	G100000402403	US8425871071	1	414	414	9	2055	2095	2135	0	0.513173	0	0	0.527498	0	0	0.510918	0	0	0.464711	0
oil/gas	United States	Americas	Northern America	Gaston Steam Plant	1		E.C. Gaston Steam Plant	272	operating	2015	2028	ST	NG/C					Alabama Power Co [50.0%]; Georgia Power Co [50.0%]	Southern Co [50.0%]; Southern Co [50.0%]	33.2442	-86.4581	exact	Wilsonville	Shelby		Alabama	https://www.gem.wiki/Gaston_Steam_Plant	L100000103780	G100000402200	US8425871071	0.5	8895		9	2055	2095	2135	0	0.513173	0	0	0.527498	0	0	0.510918	0	0	0.464711	0
oil/gas	United States	Americas	Northern America	Gaston Steam Plant	2		E.C. Gaston Steam Plant	272	operating	2015	2028	ST	NG/C					Alabama Power Co [50.0%]; Georgia Power Co [50.0%]	Southern Co [50.0%]; Southern Co [50.0%]	33.2442	-86.4581	exact	Wilsonville	Shelby		Alabama	https://www.gem.wiki/Gaston_Steam_Plant	L100000103780	G100000402201	US8425871071	0.5	8895		9	2055	2095	2135	0	0.513173	0	0	0.527498	0	0	0.510918	0	0	0.464711	0
oil/gas	United States	Americas	Northern America	Gaston Steam Plant	3		E.C. Gaston Steam Plant	272	operating	2015	2028	ST	NG/C					Alabama Power Co [50.0%]; Georgia Power Co [50.0%]	Southern Co [50.0%]; Southern Co [50.0%]	33.2442	-86.4581	exact	Wilsonville	Shelby		Alabama	https://www.gem.wiki/Gaston_Steam_Plant	L100000103780	G100000402202	US8425871071	0.5	8895		9	2055	2095	2135	0	0.513173	0	0	0.527498	0	0	0.510918	0	0	0.464711	0
oil/gas	United States	Americas	Northern America	Gaston Steam Plant	ST4		E.C. Gaston Steam Plant	245	operating	2015	2028	ST	NG/C					Alabama Power Co [50.0%]; Georgia Power Co [50.0%]	Southern Co [50.0%]; Southern Co [50.0%]	33.2442	-86.4581	exact	Wilsonville	Shelby		Alabama	https://www.gem.wiki/Gaston_Steam_Plant	L100000103780	G100000402203	US8425871071	0.5	8895		9	2055	2095	2135	0	0.513173	0	0	0.527498	0	0	0.510918	0	0	0.464711	0
oil/gas	United States	Americas	Northern America	Gaston Steam Plant	5		E.C. Gaston Steam Plant	952	announced	2028		ST	NG					Alabama Power Co [50.0%]; Georgia Power Co [50.0%]	Southern Co [50.0%]; Southern Co [50.0%]	33.2442	-86.4581	exact	Wilsonville	Shelby		Alabama	https://www.gem.wiki/Gaston_Steam_Plant	L100000103780	G100000410528	US8425871071	0.5	8895	8895	-4	2068	2108	2148	0	0.513173	0	0	0.527498	0	0	0.510918	0	0	0.464711	0
oil/gas	United States	Americas	Northern America	General Electric Plastic power station	G524			97	operating	1999		CC	NG					Alabama Power Co [100.0%]	Southern Co [100.0%]	32.3102	-86.5254	exact	Burkeville	Lowndes		Alabama	https://www.gem.wiki/General_Electric_Plastic_power_station	L100000401697	G100000402163	US8425871071	1	291	291	25	2039	2079	2119	0	0.513173	0	0	0.527498	0	0	0.510918	0	0	0.464711	0
oil/gas	United States	Americas	Northern America	Greene County Steam Plant	GT3			80	operating	1995		GT	FO/NG					Alabama Power Co [100.0%]	Southern Co [100.0%]	32.6017	-87.7811	exact	Demopolis	Greene		Alabama	https://www.gem.wiki/Greene_County_Steam_Plant	L100000103782	G100000402406	US8425871071	1	3864		29	2035	2075	2115	0	0	0.00586156	0	0	0.00547794	0	0	0.00812341	0	0	0.00400946
oil/gas	United States	Americas	Northern America	Greene County Steam Plant	GT4			80	operating	1995		GT	FO/NG					Alabama Power Co [100.0%]	Southern Co [100.0%]	32.6017	-87.7811	exact	Demopolis	Greene		Alabama	https://www.gem.wiki/Greene_County_Steam_Plant	L100000103782	G100000402407	US8425871071	1	3864		29	2035	2075	2115	0	0	0.00586156	0	0	0.00547794	0	0	0.00812341	0	0	0.00400946
oil/gas	United States	Americas	Northern America	Greene County Steam Plant	GT5			80	operating	1995		GT	FO/NG					Alabama Power Co [100.0%]	Southern Co [100.0%]	32.6017	-87.7811	exact	Demopolis	Greene		Alabama	https://www.gem.wiki/Greene_County_Steam_Plant	L100000103782	G100000402408	US8425871071	1	3864		29	2035	2075	2115	0	0	0.00586156	0	0	0.00547794	0	0	0.00812341	0	0	0.00400946
oil/gas	United States	Americas	Northern America	Greene County Steam Plant	GT6			80	operating	1995		GT	FO/NG					Alabama Power Co [100.0%]	Southern Co [100.0%]	32.6017	-87.7811	exact	Demopolis	Greene		Alabama	https://www.gem.wiki/Greene_County_Steam_Plant	L100000103782	G100000402409	US8425871071	1	3864		29	2035	2075	2115	0	0	0.00586156	0	0	0.00547794	0	0	0.00812341	0	0	0.00400946
oil/gas	United States	Americas	Northern America	Greene County Steam Plant	GT7			80	operating	1995		GT	FO/NG					Alabama Power Co [100.0%]	Southern Co [100.0%]	32.6017	-87.7811	exact	Demopolis	Greene		Alabama	https://www.gem.wiki/Greene_County_Steam_Plant	L100000103782	G100000402410	US8425871071	1	3864		29	2035	2075	2115	0	0	0.00586156	0	0	0.00547794	0	0	0.00812341	0	0	0.00400946
oil/gas	United States	Americas	Northern America	Greene County Steam Plant	GT10			80	operating	1996		GT	FO/NG					Alabama Power Co [100.0%]	Southern Co [100.0%]	32.6017	-87.7811	exact	Demopolis	Greene		Alabama	https://www.gem.wiki/Greene_County_Steam_Plant	L100000103782	G100000402404	US8425871071	1	3864		28	2036	2076	2116	0	0	0.00586156	0	0	0.00547794	0	0	0.00812341	0	0	0.00400946
oil/gas	United States	Americas	Northern America	Greene County Steam Plant	GT2			80	operating	1996		GT	FO/NG					Alabama Power Co [100.0%]	Southern Co [100.0%]	32.6017	-87.7811	exact	Demopolis	Greene		Alabama	https://www.gem.wiki/Greene_County_Steam_Plant	L100000103782	G100000402405	US8425871071	1	3864		28	2036	2076	2116	0	0	0.00586156	0	0	0.00547794	0	0	0.00812341	0	0	0.00400946
oil/gas	United States	Americas	Northern America	Greene County Steam Plant	GT8			80	operating	1996		GT	FO/NG					Alabama Power Co [100.0%]	Southern Co [100.0%]	32.6017	-87.7811	exact	Demopolis	Greene		Alabama	https://www.gem.wiki/Greene_County_Steam_Plant	L100000103782	G100000402411	US8425871071	1	3864		28	2036	2076	2116	0	0	0.00586156	0	0	0.00547794	0	0	0.00812341	0	0	0.00400946
oil/gas	United States	Americas	Northern America	Greene County Steam Plant	GT9			80	operating	1996		GT	FO/NG					Alabama Power Co [100.0%]	Southern Co [100.0%]	32.6017	-87.7811	exact	Demopolis	Greene		Alabama	https://www.gem.wiki/Greene_County_Steam_Plant	L100000103782	G100000402412	US8425871071	1	3864		28	2036	2076	2116	0	0	0.00586156	0	0	0.00547794	0	0	0.00812341	0	0	0.00400946
oil/gas	United States	Americas	Northern America	Greene County Steam Plant	1			299	operating	2016		ST	NG					Alabama Power Co [60.0%]; Mississippi Power Co [40.0%]	Southern Co [60.0%]; Southern Co [40.0%]	32.6017	-87.7811	exact	Demopolis	Greene		Alabama	https://www.gem.wiki/Greene_County_Steam_Plant	L100000103782	G100000402204	US8425871071	0.6	3864		8	2056	2096	2136	0	0.513173	0	0	0.527498	0	0	0.510918	0	0	0.464711	0
oil/gas	United States	Americas	Northern America	Greene County Steam Plant	2			269	operating	2016		ST	NG					Alabama Power Co [60.0%]; Mississippi Power Co [40.0%]	Southern Co [60.0%]; Southern Co [40.0%]	32.6017	-87.7811	exact	Demopolis	Greene		Alabama	https://www.gem.wiki/Greene_County_Steam_Plant	L100000103782	G100000402205	US8425871071	0.6	3864	3864	8	2056	2096	2136	0	0.513173	0	0	0.527498	0	0	0.510918	0	0	0.464711	0
oil/gas	United States	Americas	Northern America	H Allen Franklin Combined Cycle power station	G481			620	operating	2002		CC	NG					Southern Power Co [100.0%]	Southern Co [100.0%]	32.6078	-85.0975	exact	Smiths	Lee		Alabama	https://www.gem.wiki/H_Allen_Franklin_Combined_Cycle_power_station	L100000402286	G100000402166	US8425871071	1	5988		22	2042	2082	2122	0	0.513173	0	0	0.527498	0	0	0.510918	0	0	0.464711	0
oil/gas	United States	Americas	Northern America	H Allen Franklin Combined Cycle power station	G501			688	operating	2002		CC	NG					Southern Power Co [100.0%]	Southern Co [100.0%]	32.6078	-85.0975	exact	Smiths	Lee		Alabama	https://www.gem.wiki/H_Allen_Franklin_Combined_Cycle_power_station	L100000402286	G100000402167	US8425871071	1	5988		22	2042	2082	2122	0	0.513173	0	0	0.527498	0	0	0.510918	0	0	0.464711	0
oil/gas	United States	Americas	Northern America	H Allen Franklin Combined Cycle power station	G100			688	operating	2008		CC	NG					Southern Power Co [100.0%]	Southern Co [100.0%]	32.6078	-85.0975	exact	Smiths	Lee		Alabama	https://www.gem.wiki/H_Allen_Franklin_Combined_Cycle_power_station	L100000402286	G100000402165	US8425871071	1	5988	5988	16	2048	2088	2128	0	0.513173	0	0	0.527498	0	0	0.510918	0	0	0.464711	0
oil/gas	United States	Americas	Northern America	Intercession City power station	P11			148.5	operating	1997		GT	FO					Duke Energy Florida LLC [66.7%]; Georgia Power Co [33.3%]	Duke Energy Corp [66.7%]; Southern Co [33.3%]	28.2628	-81.5486	exact	Intercession City	Osceola		Florida	https://www.gem.wiki/Intercession_City_power_station	L100000401869	G100000414252	US8425871071	0.333	445.5	445.5	27	2037	2077	2117	0	0	0.00586156	0	0	0.00547794	0	0	0.00812341	0	0	0.00400946
oil/gas	United States	Americas	Northern America	Jack Watson Generating Plant	4			299	operating	2015	2023	ST	NG					Mississippi Power Co [100.0%]	Southern Co [100.0%]	30.4392	-89.0286	exact	Gulfport	Harrison		Mississippi	https://www.gem.wiki/Jack_Watson_Generating_Plant	L100000104009	G100000403188	US8425871071	1	2631		9	2055	2095	2135	0	0.513173	0	0	0.527498	0	0	0.510918	0	0	0.464711	0
oil/gas	United States	Americas	Northern America	Jack Watson Generating Plant	5			578	operating	2015		ST	NG					Mississippi Power Co [100.0%]	Southern Co [100.0%]	30.4392	-89.0286	exact	Gulfport	Harrison		Mississippi	https://www.gem.wiki/Jack_Watson_Generating_Plant	L100000104009	G100000403189	US8425871071	1	2631	2631	9	2055	2095	2135	0	0.513173	0	0	0.527498	0	0	0.510918	0	0	0.464711	0
oil/gas	United States	Americas	Northern America	McDonough Steam Generating Plant	G104		Atkinson power station/Jack McDonough Steam Generating Plant	922	operating	2011		CC	NG/FO					Georgia Power Co [100.0%]	Southern Co [100.0%]	33.8239	-84.4758	exact	Smyrna	Cobb		Georgia	https://www.gem.wiki/McDonough_Steam_Generating_Plant	L100000103842	G100000402137	US8425871071	1	8298		13	2051	2091	2131	0	0.513173	0	0	0.527498	0	0	0.510918	0	0	0.464711	0
oil/gas	United States	Americas	Northern America	McDonough Steam Generating Plant	G105		Atkinson power station/Jack McDonough Steam Generating Plant	922	operating	2012		CC	NG/FO					Georgia Power Co [100.0%]	Southern Co [100.0%]	33.8239	-84.4758	exact	Smyrna	Cobb		Georgia	https://www.gem.wiki/McDonough_Steam_Generating_Plant	L100000103842	G100000402138	US8425871071	1	8298		12	2052	2092	2132	0	0.513173	0	0	0.527498	0	0	0.510918	0	0	0.464711	0
oil/gas	United States	Americas	Northern America	McDonough Steam Generating Plant	G106		Atkinson power station/Jack McDonough Steam Generating Plant	922	operating	2012		CC	NG/FO					Georgia Power Co [100.0%]	Southern Co [100.0%]	33.8239	-84.4758	exact	Smyrna	Cobb		Georgia	https://www.gem.wiki/McDonough_Steam_Generating_Plant	L100000103842	G100000402139	US8425871071	1	8298	8298	12	2052	2092	2132	0	0.513173	0	0	0.527498	0	0	0.510918	0	0	0.464711	0
oil/gas	United States	Americas	Northern America	McIntosh Combined Cycle Facility	G110			688	operating	2005		CC	NG					Georgia Power Co [100.0%]	Southern Co [100.0%]	32.3478	-81.1817	exact	Rincon	Effingham		Georgia	https://www.gem.wiki/McIntosh_Combined_Cycle_Facility	L100000401979	G100000402001	US8425871071	1	4128		19	2045	2085	2125	0	0.513173	0	0	0.527498	0	0	0.510918	0	0	0.464711	0
oil/gas	United States	Americas	Northern America	McIntosh Combined Cycle Facility	G111			688	operating	2005		CC	NG					Georgia Power Co [100.0%]	Southern Co [100.0%]	32.3478	-81.1817	exact	Rincon	Effingham		Georgia	https://www.gem.wiki/McIntosh_Combined_Cycle_Facility	L100000401979	G100000402002	US8425871071	1	4128	4128	19	2045	2085	2125	0	0.513173	0	0	0.527498	0	0	0.510918	0	0	0.464711	0
oil/gas	United States	Americas	Northern America	McIntosh Steam Plant	CT3			101	operating	1994		GT	NG/FO					Georgia Power Co [100.0%]	Southern Co [100.0%]	32.3563	-81.1684	exact	Rincon	Effingham		Georgia	https://www.gem.wiki/McIntosh_Steam_Plant	L100000103843	G100000402947	US8425871071	1	2424		30	2034	2074	2114	0	0.513173	0	0	0.527498	0	0	0.510918	0	0	0.464711	0
oil/gas	United States	Americas	Northern America	McIntosh Steam Plant	CT4			101	operating	1994		GT	NG/FO					Georgia Power Co [100.0%]	Southern Co [100.0%]	32.3563	-81.1684	exact	Rincon	Effingham		Georgia	https://www.gem.wiki/McIntosh_Steam_Plant	L100000103843	G100000402948	US8425871071	1	2424		30	2034	2074	2114	0	0.513173	0	0	0.527498	0	0	0.510918	0	0	0.464711	0
oil/gas	United States	Americas	Northern America	McIntosh Steam Plant	CT5			101	operating	1994		GT	NG/FO					Georgia Power Co [100.0%]	Southern Co [100.0%]	32.3563	-81.1684	exact	Rincon	Effingham		Georgia	https://www.gem.wiki/McIntosh_Steam_Plant	L100000103843	G100000402949	US8425871071	1	2424		30	2034	2074	2114	0	0.513173	0	0	0.527498	0	0	0.510918	0	0	0.464711	0
oil/gas	United States	Americas	Northern America	McIntosh Steam Plant	CT6			101	operating	1994		GT	NG/FO					Georgia Power Co [100.0%]	Southern Co [100.0%]	32.3563	-81.1684	exact	Rincon	Effingham		Georgia	https://www.gem.wiki/McIntosh_Steam_Plant	L100000103843	G100000402950	US8425871071	1	2424		30	2034	2074	2114	0	0.513173	0	0	0.527498	0	0	0.510918	0	0	0.464711	0
oil/gas	United States	Americas	Northern America	McIntosh Steam Plant	CT7			101	operating	1994		GT	NG/FO					Georgia Power Co [100.0%]	Southern Co [100.0%]	32.3563	-81.1684	exact	Rincon	Effingham		Georgia	https://www.gem.wiki/McIntosh_Steam_Plant	L100000103843	G100000402951	US8425871071	1	2424		30	2034	2074	2114	0	0.513173	0	0	0.527498	0	0	0.510918	0	0	0.464711	0
oil/gas	United States	Americas	Northern America	McIntosh Steam Plant	CT8			101	operating	1994		GT	NG/FO					Georgia Power Co [100.0%]	Southern Co [100.0%]	32.3563	-81.1684	exact	Rincon	Effingham		Georgia	https://www.gem.wiki/McIntosh_Steam_Plant	L100000103843	G100000402952	US8425871071	1	2424		30	2034	2074	2114	0	0.513173	0	0	0.527498	0	0	0.510918	0	0	0.464711	0
oil/gas	United States	Americas	Northern America	McIntosh Steam Plant	CT1			101	operating	1995		GT	NG/FO					Georgia Power Co [100.0%]	Southern Co [100.0%]	32.3563	-81.1684	exact	Rincon	Effingham		Georgia	https://www.gem.wiki/McIntosh_Steam_Plant	L100000103843	G100000402945	US8425871071	1	2424		29	2035	2075	2115	0	0.513173	0	0	0.527498	0	0	0.510918	0	0	0.464711	0
oil/gas	United States	Americas	Northern America	McIntosh Steam Plant	CT2			101	operating	1995		GT	NG/FO					Georgia Power Co [100.0%]	Southern Co [100.0%]	32.3563	-81.1684	exact	Rincon	Effingham		Georgia	https://www.gem.wiki/McIntosh_Steam_Plant	L100000103843	G100000402946	US8425871071	1	2424	2424	29	2035	2075	2115	0	0.513173	0	0	0.527498	0	0	0.510918	0	0	0.464711	0
oil/gas	United States	Americas	Northern America	McManus power station	3A			55.4	operating	1972		GT	FO					Georgia Power Co [100.0%]	Southern Co [100.0%]	31.2136	-81.5462	exact	Brunswick	Glynn		Georgia	https://www.gem.wiki/McManus_power_station	L100000409266	G100000414239	US8425871071	1	1674		52	2012	2052	2092	0	0	0.00586156	0	0	0.00547794	0	0	0.00812341	0	0	0.00400946
oil/gas	United States	Americas	Northern America	McManus power station	3B			55.4	operating	1972		GT	FO					Georgia Power Co [100.0%]	Southern Co [100.0%]	31.2136	-81.5462	exact	Brunswick	Glynn		Georgia	https://www.gem.wiki/McManus_power_station	L100000409266	G100000414238	US8425871071	1	1674		52	2012	2052	2092	0	0	0.00586156	0	0	0.00547794	0	0	0.00812341	0	0	0.00400946
oil/gas	United States	Americas	Northern America	McManus power station	3C			55.4	operating	1972		GT	FO					Georgia Power Co [100.0%]	Southern Co [100.0%]	31.2136	-81.5462	exact	Brunswick	Glynn		Georgia	https://www.gem.wiki/McManus_power_station	L100000409266	G100000414237	US8425871071	1	1674		52	2012	2052	2092	0	0	0.00586156	0	0	0.00547794	0	0	0.00812341	0	0	0.00400946
oil/gas	United States	Americas	Northern America	McManus power station	4A			65.3	operating	1972		GT	FO					Georgia Power Co [100.0%]	Southern Co [100.0%]	31.2136	-81.5462	exact	Brunswick	Glynn		Georgia	https://www.gem.wiki/McManus_power_station	L100000409266	G100000414236	US8425871071	1	1674		52	2012	2052	2092	0	0	0.00586156	0	0	0.00547794	0	0	0.00812341	0	0	0.00400946
oil/gas	United States	Americas	Northern America	McManus power station	4B			65.3	operating	1972		GT	FO					Georgia Power Co [100.0%]	Southern Co [100.0%]	31.2136	-81.5462	exact	Brunswick	Glynn		Georgia	https://www.gem.wiki/McManus_power_station	L100000409266	G100000414235	US8425871071	1	1674		52	2012	2052	2092	0	0	0.00586156	0	0	0.00547794	0	0	0.00812341	0	0	0.00400946
oil/gas	United States	Americas	Northern America	McManus power station	4C			65.3	operating	1972		GT	FO					Georgia Power Co [100.0%]	Southern Co [100.0%]	31.2136	-81.5462	exact	Brunswick	Glynn		Georgia	https://www.gem.wiki/McManus_power_station	L100000409266	G100000414234	US8425871071	1	1674		52	2012	2052	2092	0	0	0.00586156	0	0	0.00547794	0	0	0.00812341	0	0	0.00400946
oil/gas	United States	Americas	Northern America	McManus power station	4D			65.3	operating	1972		GT	FO					Georgia Power Co [100.0%]	Southern Co [100.0%]	31.2136	-81.5462	exact	Brunswick	Glynn		Georgia	https://www.gem.wiki/McManus_power_station	L100000409266	G100000414233	US8425871071	1	1674		52	2012	2052	2092	0	0	0.00586156	0	0	0.00547794	0	0	0.00812341	0	0	0.00400946
oil/gas	United States	Americas	Northern America	McManus power station	4E			65.3	operating	1972		GT	FO					Georgia Power Co [100.0%]	Southern Co [100.0%]	31.2136	-81.5462	exact	Brunswick	Glynn		Georgia	https://www.gem.wiki/McManus_power_station	L100000409266	G100000414232	US8425871071	1	1674		52	2012	2052	2092	0	0	0.00586156	0	0	0.00547794	0	0	0.00812341	0	0	0.00400946
oil/gas	United States	Americas	Northern America	McManus power station	4F			65.3	operating	1972		GT	FO					Georgia Power Co [100.0%]	Southern Co [100.0%]	31.2136	-81.5462	exact	Brunswick	Glynn		Georgia	https://www.gem.wiki/McManus_power_station	L100000409266	G100000414231	US8425871071	1	1674	1674	52	2012	2052	2092	0	0	0.00586156	0	0	0.00547794	0	0	0.00812341	0	0	0.00400946
oil/gas	United States	Americas	Northern America	Ratcliffe power plant	1			840	operating	2014		CC	NG					Mississippi Power Co [100.0%]	Southern Co [100.0%]	32.6547	-88.7622	exact	De Kalb	Kemper		Mississippi	https://www.gem.wiki/Ratcliffe_power_plant	L100000402096	G100000402041	US8425871071	1	2520	2520	10	2054	2094	2134	0	0.513173	0	0	0.527498	0	0	0.510918	0	0	0.464711	0
oil/gas	United States	Americas	Northern America	Robins power station	1			92	operating	1995		GT	NG/FO					Georgia Power Co [100.0%]	Southern Co [100.0%]	32.5792	-83.5822	exact	Robins AFB	Houston		Georgia	https://www.gem.wiki/Robins_power_station	L100000401980	G100000402953	US8425871071	1	552		29	2035	2075	2115	0	0.513173	0	0	0.527498	0	0	0.510918	0	0	0.464711	0
oil/gas	United States	Americas	Northern America	Robins power station	2			92	operating	1995		GT	NG/FO					Georgia Power Co [100.0%]	Southern Co [100.0%]	32.5792	-83.5822	exact	Robins AFB	Houston		Georgia	https://www.gem.wiki/Robins_power_station	L100000401980	G100000402954	US8425871071	1	552	552	29	2035	2075	2115	0	0.513173	0	0	0.527498	0	0	0.510918	0	0	0.464711	0
oil/gas	United States	Americas	Northern America	Rowan power station	1			199	operating	2001		GT	FO/NG					Southern Power Co [100.0%]	Southern Co [100.0%]	35.7314	-80.6019	exact	Salisbury	Rowan		North Carolina	https://www.gem.wiki/Rowan_power_station	L100000402288	G100000403536	US8425871071	1	3573		23	2041	2081	2121	0	0	0.00586156	0	0	0.00547794	0	0	0.00812341	0	0	0.00400946
oil/gas	United States	Americas	Northern America	Rowan power station	2			199	operating	2001		GT	FO/NG					Southern Power Co [100.0%]	Southern Co [100.0%]	35.7314	-80.6019	exact	Salisbury	Rowan		North Carolina	https://www.gem.wiki/Rowan_power_station	L100000402288	G100000403537	US8425871071	1	3573		23	2041	2081	2121	0	0	0.00586156	0	0	0.00547794	0	0	0.00812341	0	0	0.00400946
oil/gas	United States	Americas	Northern America	Rowan power station	3			199	operating	2001		GT	FO/NG					Southern Power Co [100.0%]	Southern Co [100.0%]	35.7314	-80.6019	exact	Salisbury	Rowan		North Carolina	https://www.gem.wiki/Rowan_power_station	L100000402288	G100000403538	US8425871071	1	3573		23	2041	2081	2121	0	0	0.00586156	0	0	0.00547794	0	0	0.00812341	0	0	0.00400946
oil/gas	United States	Americas	Northern America	Rowan power station	G102			594	operating	2003		CC	NG/FO					Southern Power Co [100.0%]	Southern Co [100.0%]	35.7314	-80.6019	exact	Salisbury	Rowan		North Carolina	https://www.gem.wiki/Rowan_power_station	L100000402288	G100000402174	US8425871071	1	3573	3573	21	2043	2083	2123	0	0.513173	0	0	0.527498	0	0	0.510918	0	0	0.464711	0
oil/gas	United States	Americas	Northern America	Tenaska Central Alabama generating station	STG1			927	operating	2003		CC	NG/FO					Alabama Power Co [100.0%]	Southern Co [100.0%]	32.6497	-86.74	exact	Billingsley	Autauga		Alabama	https://www.gem.wiki/Tenaska_Central_Alabama_generating_station	L100000401620	G100000401923	US8425871071	1	2781	2781	21	2043	2083	2123	0	0.513173	0	0	0.527498	0	0	0.510918	0	0	0.464711	0
oil/gas	United States	Americas	Northern America	Theodore cogeneration facility	G525			317	operating	2000		CC	NG					Alabama Power Co [100.0%]	Southern Co [100.0%]	30.5254	-88.1285	exact	Theodore	Mobile		Alabama	https://www.gem.wiki/Theodore_cogeneration_facility	L100000401698	G100000402168	US8425871071	1	951	951	24	2040	2080	2120	0	0.513173	0	0	0.527498	0	0	0.510918	0	0	0.464711	0
oil/gas	United States	Americas	Northern America	Victor J Daniel Jr power station	3		Plant Daniel	566	operating	2001		CC	NG					Mississippi Power Co [100.0%]	Southern Co [100.0%]	30.5322	-88.5553	exact	Escatawpa	Jackson		Mississippi	https://www.gem.wiki/Victor_J_Daniel_Jr_power_station	L100000402097	G100000402099	US8425871071	1	3396		23	2041	2081	2121	0	0.513173	0	0	0.527498	0	0	0.510918	0	0	0.464711	0
oil/gas	United States	Americas	Northern America	Victor J Daniel Jr power station	4		Plant Daniel	566	operating	2001		CC	NG					Mississippi Power Co [100.0%]	Southern Co [100.0%]	30.5322	-88.5553	exact	Escatawpa	Jackson		Mississippi	https://www.gem.wiki/Victor_J_Daniel_Jr_power_station	L100000402097	G100000402100	US8425871071	1	3396	3396	23	2041	2081	2121	0	0.513173	0	0	0.527498	0	0	0.510918	0	0	0.464711	0
oil/gas	United States	Americas	Northern America	Wansley Plant	G106			620	operating	2002		CC	NG					Southern Power Co [100.0%]	Southern Co [100.0%]	33.4064	-85.037	exact	Franklin	Heard		Georgia	https://www.gem.wiki/Wansley_Plant	L100000103848	G100000401986	US8425871071	1	9432		22	2042	2082	2122	0	0.513173	0	0	0.527498	0	0	0.510918	0	0	0.464711	0
oil/gas	United States	Americas	Northern America	Wansley Plant	G107			620	operating	2002		CC	NG					Southern Power Co [100.0%]	Southern Co [100.0%]	33.4064	-85.037	exact	Franklin	Heard		Georgia	https://www.gem.wiki/Wansley_Plant	L100000103848	G100000401987	US8425871071	1	9432	9432	22	2042	2082	2122	0	0.513173	0	0	0.527498	0	0	0.510918	0	0	0.464711	0
oil/gas	United States	Americas	Northern America	Wansley power station	5A			52.8	retired	1980	2022	GT	FO					Georgia Power Co [53.5%]; Oglethorpe Power Corp [30.0%]; Municipal Electric Authority of Georgia [15.1%]; Dalton Utilities [1.4%]	Southern Co [53.5%]; Municipal Electric Authority of Georgia [15.1%]	33.4134	-85.0323	exact	Roopville	Heard		Georgia	https://www.gem.wiki/Wansley_power_station	L100000409254	G100000414179	US8425871071	0.535	158.4	158.4	44	2020	2060	2100	0	0	0.00586156	0	0	0.00547794	0	0	0.00812341	0	0	0.00400946
oil/gas	United States	Americas	Northern America	Washington County cogeneration facility (AL)	G523			123	operating	1999		CC	NG					Alabama Power Co [100.0%]	Southern Co [100.0%]	31.2504	-88.0156	exact	McIntosh	Washington		Alabama	https://www.gem.wiki/Washington_County_cogeneration_facility_(AL)	L100000401699	G100000402162	US8425871071	1	369	369	25	2039	2079	2119	0	0.513173	0	0	0.527498	0	0	0.510918	0	0	0.464711	0
oil/gas	United States	Americas	Northern America	Wilson power station	5A			52.5	operating	1972		GT	FO					Georgia Power Co [100.0%]	Southern Co [100.0%]	33.1377	-81.7483	exact	Waynesboro	Burke		Georgia	https://www.gem.wiki/Wilson_Station	L100000409274	G100000414112	US8425871071	1	945		52	2012	2052	2092	0	0	0.00586156	0	0	0.00547794	0	0	0.00812341	0	0	0.00400946
oil/gas	United States	Americas	Northern America	Wilson power station	5B			52.5	operating	1972		GT	FO					Georgia Power Co [100.0%]	Southern Co [100.0%]	33.1377	-81.7483	exact	Waynesboro	Burke		Georgia	https://www.gem.wiki/Wilson_Station	L100000409274	G100000414111	US8425871071	1	945		52	2012	2052	2092	0	0	0.00586156	0	0	0.00547794	0	0	0.00812341	0	0	0.00400946
oil/gas	United States	Americas	Northern America	Wilson power station	5C			52.5	operating	1972		GT	FO					Georgia Power Co [100.0%]	Southern Co [100.0%]	33.1377	-81.7483	exact	Waynesboro	Burke		Georgia	https://www.gem.wiki/Wilson_Station	L100000409274	G100000414110	US8425871071	1	945		52	2012	2052	2092	0	0	0.00586156	0	0	0.00547794	0	0	0.00812341	0	0	0.00400946
oil/gas	United States	Americas	Northern America	Wilson power station	5D			52.5	operating	1973		GT	FO					Georgia Power Co [100.0%]	Southern Co [100.0%]	33.1377	-81.7483	exact	Waynesboro	Burke		Georgia	https://www.gem.wiki/Wilson_Station	L100000409274	G100000414109	US8425871071	1	945		51	2013	2053	2093	0	0	0.00586156	0	0	0.00547794	0	0	0.00812341	0	0	0.00400946
oil/gas	United States	Americas	Northern America	Wilson power station	5E			52.5	operating	1973		GT	FO					Georgia Power Co [100.0%]	Southern Co [100.0%]	33.1377	-81.7483	exact	Waynesboro	Burke		Georgia	https://www.gem.wiki/Wilson_Station	L100000409274	G100000414108	US8425871071	1	945		51	2013	2053	2093	0	0	0.00586156	0	0	0.00547794	0	0	0.00812341	0	0	0.00400946
oil/gas	United States	Americas	Northern America	Wilson power station	5F			52.5	operating	1973		GT	FO					Georgia Power Co [100.0%]	Southern Co [100.0%]	33.1377	-81.7483	exact	Waynesboro	Burke		Georgia	https://www.gem.wiki/Wilson_power_station	L100000409274	G100000414107	US8425871071	1	945	945	51	2013	2053	2093	0	0	0.00586156	0	0	0.00547794	0	0	0.00812341	0	0	0.00400946
oil/gas	United States	Americas	Northern America	Yates Steam Generating Plant	6			404	operating	2015		ST	NG					Georgia Power Co [100.0%]	Southern Co [100.0%]	33.4622	-84.8986	exact	Newnan	Coweta		Georgia	https://www.gem.wiki/Yates_Steam_Generating_Plant	L100000103850	G100000402955	US8425871071	1	2424		9	2055	2095	2135	0	0.513173	0	0	0.527498	0	0	0.510918	0	0	0.464711	0
oil/gas	United States	Americas	Northern America	Yates Steam Generating Plant	7			404	operating	2015		ST	NG					Georgia Power Co [100.0%]	Southern Co [100.0%]	33.4622	-84.8986	exact	Newnan	Coweta		Georgia	https://www.gem.wiki/Yates_Steam_Generating_Plant	L100000103850	G100000402956	US8425871071	1	2424	2424	9	2055	2095	2135	0	0.513173	0	0	0.527498	0	0	0.510918	0	0	0.464711	0
Type	Country/area	Region	Subregion	Plant / Project name	Unit / Phase name	Plant / Project name (local)	Plant / Project name (other)	Capacity (MW)	Status	Start year	Retired year	Technology	Fuel	Country/area 1 (hydropower only)	Country/area 2 (hydropower only)	Country/area 1 Capacity (MW) (hydropower only)	Country/area 2 Capacity (MW) (hydropower only)	Owner	Parent	Latitude	Longitude	Location accuracy	City	Local area (taluk, county)	Major area (prefecture, district)	Subnational unit (state, province)	GEM.Wiki URL	GEM location ID	GEM unit/phase ID	CompISIN	Ownership	Plant capacity	Plant capacity	Age	Reinvestment year	Reinvestment year	Reinvestment year	2020	2021	2022	2023	2024	2025	2026	2027	2028	2029	2030	2031
coal	United States	Americas	Northern America	Barry Steam Plant	Unit 4			403.7	operating	1969	2028	subcritical	bituminous					Alabama Power [100%]	Southern Co [100.0%]	31.0066	-88.0088	exact	Bucks	Mobile		Alabama	https://www.gem.wiki/Barry_Steam_Plant	L100000103776	G100000100647	US8425871071	1	11077.5		55	2009	2049	2089	1.34838e+06	1.90449e+06	1.9691e+06	1.9394e+06	1.79034e+06	1.79034e+06	1.79034e+06	1.79034e+06	1.79034e+06	1.79034e+06	1.79034e+06	1.79034e+06
coal	United States	Americas	Northern America	Barry Steam Plant	Unit 5			788.8	operating	1971	2028	supercritical	bituminous					Alabama Power [100%]	Southern Co [100.0%]	31.0066	-88.0088	exact	Bucks	Mobile		Alabama	https://www.gem.wiki/Barry_Steam_Plant	L100000103776	G100000100648	US8425871071	1	11077.5	11077.5	53	2011	2051	2091	2.63463e+06	3.72123e+06	3.84747e+06	3.78944e+06	3.49819e+06	3.49819e+06	3.49819e+06	3.49819e+06	3.49819e+06	3.49819e+06	3.49819e+06	3.49819e+06
coal	United States	Americas	Northern America	Daniel Generating Plant	Unit 1		Victor J. Daniel Generating Plant	500	operating	1977	2024	subcritical	bituminous					Florida Power & Light [50%]; Mississippi Power [50%]	NextEra Energy Inc [50.0%]; Southern Co [50.0%]	30.5327	-88.5571	exact	Escatawpa	Jackson		Mississippi	https://www.gem.wiki/Daniel_Generating_Plant	L100000104008	G100000101965	US8425871071	0.5	3000		47	2017	2057	2097	835013	1.17939e+06	1.21941e+06	1.20102e+06	1.10871e+06	1.10871e+06	1.10871e+06	1.10871e+06	1.10871e+06	1.10871e+06	1.10871e+06	1.10871e+06
coal	United States	Americas	Northern America	Daniel Generating Plant	Unit 2		Victor J. Daniel Generating Plant	500	operating	1981	2027	subcritical	bituminous					Florida Power & Light [50%]; Mississippi Power [50%]	NextEra Energy Inc [50.0%]; Southern Co [50.0%]	30.5327	-88.5571	exact	Escatawpa	Jackson		Mississippi	https://www.gem.wiki/Daniel_Generating_Plant	L100000104008	G100000101966	US8425871071	0.5	3000	3000	43	2021	2061	2101	835013	1.17939e+06	1.21941e+06	1.20102e+06	1.10871e+06	1.10871e+06	1.10871e+06	1.10871e+06	1.10871e+06	1.10871e+06	1.10871e+06	1.10871e+06
coal	United States	Americas	Northern America	Gaston Steam Plant	Unit 5		EC Gaston power station	952	operating	1974	2028	supercritical	bituminous					Alabama Power [100%]	Southern Co [100.0%]	33.2432	-86.4589	exact	Wilsonville	Shelby		Alabama	https://www.gem.wiki/Gaston_Steam_Plant	L100000103780	G100000102959	US8425871071	1	8895	8895	50	2014	2054	2094	3.17973e+06	4.49114e+06	4.6435e+06	4.57347e+06	4.22196e+06	4.22196e+06	4.22196e+06	4.22196e+06	4.22196e+06	4.22196e+06	4.22196e+06	4.22196e+06
coal	United States	Americas	Northern America	Miller Steam Plant	Unit 1		James H. Miller Jr. Steam Plant	705.5	operating	1978		subcritical	subbituminous					Alabama Power [91%]; PowerSouth Energy Cooperative [8%]	Southern Co [91.8%]; PowerSouth Energy Cooperative [8.2%]	33.6332	-87.0598	exact	West Jefferson	Jefferson		Alabama	https://www.gem.wiki/Miller_Steam_Plant	L100000103783	G100000106922	US8425871071	0.918	8466		46	2018	2058	2098	2.19748e+06	3.10378e+06	3.20908e+06	3.16068e+06	2.91775e+06	2.91775e+06	2.91775e+06	2.91775e+06	2.91775e+06	2.91775e+06	2.91775e+06	2.91775e+06
coal	United States	Americas	Northern America	Miller Steam Plant	Unit 2		James H. Miller Jr. Steam Plant	705.5	operating	1985		subcritical	subbituminous					Alabama Power [91%]; PowerSouth Energy Cooperative [8%]	Southern Co [91.8%]; PowerSouth Energy Cooperative [8.2%]	33.6332	-87.0598	exact	West Jefferson	Jefferson		Alabama	https://www.gem.wiki/Miller_Steam_Plant	L100000103783	G100000106923	US8425871071	0.918	8466		39	2025	2065	2105	2.19748e+06	3.10378e+06	3.20908e+06	3.16068e+06	2.91775e+06	2.91775e+06	2.91775e+06	2.91775e+06	2.91775e+06	2.91775e+06	2.91775e+06	2.91775e+06
coal	United States	Americas	Northern America	Miller Steam Plant	Unit 3		James H. Miller Jr. Steam Plant	705.5	operating	1989		subcritical	subbituminous					Alabama Power [100%]	Southern Co [100.0%]	33.6332	-87.0598	exact	West Jefferson	Jefferson		Alabama	https://www.gem.wiki/Miller_Steam_Plant	L100000103783	G100000106924	US8425871071	1	8466		35	2029	2069	2109	2.39377e+06	3.38103e+06	3.49573e+06	3.44301e+06	3.17838e+06	3.17838e+06	3.17838e+06	3.17838e+06	3.17838e+06	3.17838e+06	3.17838e+06	3.17838e+06
coal	United States	Americas	Northern America	Miller Steam Plant	Unit 4		James H. Miller Jr. Steam Plant	705.5	operating	1991		subcritical	subbituminous					Alabama Power [100%]	Southern Co [100.0%]	33.6332	-87.0598	exact	West Jefferson	Jefferson		Alabama	https://www.gem.wiki/Miller_Steam_Plant	L100000103783	G100000106925	US8425871071	1	8466	8466	33	2031	2071	2111	2.39377e+06	3.38103e+06	3.49573e+06	3.44301e+06	3.17838e+06	3.17838e+06	3.17838e+06	3.17838e+06	3.17838e+06	3.17838e+06	3.17838e+06	3.17838e+06
coal	United States	Americas	Northern America	Plant Bowen	Unit 1			805.8	operating	1971	2028	supercritical	bituminous					Georgia Power [100%]	Southern Co [100.0%]	34.126	-84.9207	exact	Taylorsville	Bartow		Georgia	https://www.gem.wiki/Plant_Bowen	L100000103845	G100000108023	US8425871071	1	10495.8		53	2011	2051	2091	2.69141e+06	3.80143e+06	3.93039e+06	3.87111e+06	3.57358e+06	3.57358e+06	3.57358e+06	3.57358e+06	3.57358e+06	3.57358e+06	3.57358e+06	3.57358e+06
coal	United States	Americas	Northern America	Plant Bowen	Unit 2			788.8	operating	1972	2028	supercritical	bituminous					Georgia Power [100%]	Southern Co [100.0%]	34.126	-84.9207	exact	Taylorsville	Bartow		Georgia	https://www.gem.wiki/Plant_Bowen	L100000103845	G100000108024	US8425871071	1	10495.8		52	2012	2052	2092	2.63463e+06	3.72123e+06	3.84747e+06	3.78944e+06	3.49819e+06	3.49819e+06	3.49819e+06	3.49819e+06	3.49819e+06	3.49819e+06	3.49819e+06	3.49819e+06
coal	United States	Americas	Northern America	Plant Bowen	Unit 3			952	operating	1974	2035	supercritical	bituminous					Georgia Power [100%]	Southern Co [100.0%]	34.126	-84.9207	exact	Taylorsville	Bartow		Georgia	https://www.gem.wiki/Plant_Bowen	L100000103845	G100000108025	US8425871071	1	10495.8		50	2014	2054	2094	3.17973e+06	4.49114e+06	4.6435e+06	4.57347e+06	4.22196e+06	4.22196e+06	4.22196e+06	4.22196e+06	4.22196e+06	4.22196e+06	4.22196e+06	4.22196e+06
coal	United States	Americas	Northern America	Plant Bowen	Unit 4			952	operating	1975	2035	supercritical	bituminous					Georgia Power [100%]	Southern Co [100.0%]	34.126	-84.9207	exact	Taylorsville	Bartow		Georgia	https://www.gem.wiki/Plant_Bowen	L100000103845	G100000108026	US8425871071	1	10495.8	10495.8	49	2015	2055	2095	3.17973e+06	4.49114e+06	4.6435e+06	4.57347e+06	4.22196e+06	4.22196e+06	4.22196e+06	4.22196e+06	4.22196e+06	4.22196e+06	4.22196e+06	4.22196e+06
coal	United States	Americas	Northern America	Red Hills Generation Facility	Unit 1			513.7	operating	2001		subcritical	lignite					S E Choctaw [100%]	Southern Co [100.0%]	33.3762	-89.2185	exact	Red Hills	Choctaw		Mississippi	https://www.gem.wiki/Red_Hills_Generation_Facility	L100000104012	G100000108505	US8425871071	1	1541.1	1541.1	23	2041	2081	2121	1.83186e+06	2.58737e+06	2.67515e+06	2.6348e+06	2.4323e+06	2.4323e+06	2.4323e+06	2.4323e+06	2.4323e+06	2.4323e+06	2.4323e+06	2.4323e+06
coal	United States	Americas	Northern America	Scherer Steam Generating Station	Unit 1			891	operating	1982		subcritical	subbituminous					other unknown/mixed entity types [1%]; Oglethorpe Power [60%]; Municipal Electric Authority of Georgia [30%]; Georgia Power [8%]	Oglethorpe Power [60.0%]; Municipal Electric Authority of Georgia [30.2%]; Southern Co [8.4%]; other unknown/mixed entity types [1.4%]	33.0603	-83.8069	exact	Juliette	Monroe		Georgia	https://www.gem.wiki/Scherer_Steam_Generating_Station	L100000103847	G100000108869	US8425871071	0.084	8019		42	2022	2062	2102	253947	358681	370849	365256	337183	337183	337183	337183	337183	337183	337183	337183
coal	United States	Americas	Northern America	Scherer Steam Generating Station	Unit 2			891	operating	1984		subcritical	subbituminous					Municipal Electric Authority of Georgia [30%]; Oglethorpe Power [60%]; Georgia Power [8%]; other unknown/mixed entity types [1%]	Oglethorpe Power [60.0%]; Municipal Electric Authority of Georgia [30.2%]; Southern Co [8.4%]; other unknown/mixed entity types [1.4%]	33.0603	-83.8069	exact	Juliette	Monroe		Georgia	https://www.gem.wiki/Scherer_Steam_Generating_Station	L100000103847	G100000108870	US8425871071	0.084	8019		40	2024	2064	2104	253947	358681	370849	365256	337183	337183	337183	337183	337183	337183	337183	337183
coal	United States	Americas	Northern America	Scherer Steam Generating Station	Unit 3			891	operating	1987	2028	subcritical	subbituminous					Florida Power & Light [25%]; Georgia Power [75%]	Southern Co [75.0%]; NextEra Energy Inc [25.0%]	33.0603	-83.8069	exact	Juliette	Monroe		Georgia	https://www.gem.wiki/Scherer_Steam_Generating_Station	L100000103847	G100000108871	US8425871071	0.75	8019	8019	37	2027	2067	2107	2.26738e+06	3.20251e+06	3.31115e+06	3.26122e+06	3.01057e+06	3.01057e+06	3.01057e+06	3.01057e+06	3.01057e+06	3.01057e+06	3.01057e+06	3.01057e+06
coal	United States	Americas	Northern America	Wansley Plant	Unit 1			952	retired	1976	2022	supercritical	bituminous					Oglethorpe Power [30%]; Municipal Electric Authority of Georgia [15%]; Georgia Power [53%]; other unknown/mixed entity types [1%]	Southern Co [53.5%]; Oglethorpe Power [30.0%]; Municipal Electric Authority of Georgia [15.1%]; other unknown/mixed entity types [1.4%]	33.4127	-85.0339	exact	Roopville	Heard		Georgia	https://www.gem.wiki/Wansley_Plant	L100000103848	G100000110728	US8425871071	0.535	9432		48	2016	2056	2096	1.70115e+06	2.40276e+06	0	0	0	0	0	0	0	0	0	0
coal	United States	Americas	Northern America	Wansley Plant	Unit 2			952	retired	1978	2022	supercritical	bituminous					Oglethorpe Power [30%]; Municipal Electric Authority of Georgia [15%]; Georgia Power [53%]; other unknown/mixed entity types [1%]	Southern Co [53.5%]; Oglethorpe Power [30.0%]; Municipal Electric Authority of Georgia [15.1%]; other unknown/mixed entity types [1.4%]	33.4127	-85.0339	exact	Roopville	Heard		Georgia	https://www.gem.wiki/Wansley_Plant	L100000103848	G100000110729	US8425871071	0.535	9432	9432	46	2018	2058	2098	1.70115e+06	2.40276e+06	0	0	0	0	0	0	0	0	0	0
oil/gas	United States	Americas	Northern America	Barry Steam Plant	G521		James M. Barry Electric Generating Plant	535	operating	2000		CC	NG					Alabama Power Co [100.0%]	Southern Co [100.0%]	31.0069	-88.0103	exact	Bucks	Mobile		Alabama	https://www.gem.wiki/Barry_Steam_Plant	L100000103776	G100000401686	US8425871071	1	11077.5		24	2040	2080	2120	1.18133e+06	1.21431e+06	1.17614e+06	1.06977e+06	1.16039e+06	1.16039e+06	1.16039e+06	1.16039e+06	1.16039e+06	1.16039e+06	1.16039e+06	1.16039e+06
oil/gas	United States	Americas	Northern America	Barry Steam Plant	G522		James M. Barry Electric Generating Plant	535	operating	2000		CC	NG					Alabama Power Co [100.0%]	Southern Co [100.0%]	31.0069	-88.0103	exact	Bucks	Mobile		Alabama	https://www.gem.wiki/Barry_Steam_Plant	L100000103776	G100000401687	US8425871071	1	11077.5		24	2040	2080	2120	1.18133e+06	1.21431e+06	1.17614e+06	1.06977e+06	1.16039e+06	1.16039e+06	1.16039e+06	1.16039e+06	1.16039e+06	1.16039e+06	1.16039e+06	1.16039e+06
oil/gas	United States	Americas	Northern America	Barry Steam Plant	1		James M. Barry Electric Generating Plant	153	operating	2015		ST	NG					Alabama Power Co [100.0%]	Southern Co [100.0%]	31.0069	-88.0103	exact	Bucks	Mobile		Alabama	https://www.gem.wiki/Barry_Steam_Plant	L100000103776	G100000402400	US8425871071	1	11077.5		9	2055	2095	2135	337839	347270	336355	305935	331850	331850	331850	331850	331850	331850	331850	331850
oil/gas	United States	Americas	Northern America	Barry Steam Plant	2		James M. Barry Electric Generating Plant	153	operating	2015		ST	NG					Alabama Power Co [100.0%]	Southern Co [100.0%]	31.0069	-88.0103	exact	Bucks	Mobile		Alabama	https://www.gem.wiki/Barry_Steam_Plant	L100000103776	G100000402401	US8425871071	1	11077.5		9	2055	2095	2135	337839	347270	336355	305935	331850	331850	331850	331850	331850	331850	331850	331850
oil/gas	United States	Americas	Northern America	Barry Steam Plant	G523		James M. Barry Electric Generating Plant	774	operating	2023		CC	NG					Alabama Power Co [100.0%]	Southern Co [100.0%]	31.0069	-88.0103	exact	Bucks	Mobile		Alabama	https://www.gem.wiki/Barry_Steam_Plant	L100000103776	G100000409443	US8425871071	1	11077.5		1	2063	2103	2143	0	0	0	1.54767e+06	1.67877e+06	1.67877e+06	1.67877e+06	1.67877e+06	1.67877e+06	1.67877e+06	1.67877e+06	1.67877e+06
oil/gas	United States	Americas	Northern America	Barry Steam Plant	4		James M. Barry Electric Generating Plant	350	pre-construction	2028		ST	NG					Alabama Power Co [100.0%]	Southern Co [100.0%]	31.0069	-88.0103	exact	Bucks	Mobile		Alabama	https://www.gem.wiki/Barry_Steam_Plant	L100000103776	G100000410538	US8425871071	1	11077.5	11077.5	-4	2068	2108	2148	0	0	0	0	0	0	0	0	759133	759133	759133	759133
oil/gas	United States	Americas	Northern America	Chevron Oil power station	5			101	operating	1994		GT	NG					Mississippi Power Co [100.0%]	Southern Co [100.0%]	30.34	-88.4919	exact	Pascagoula	Jackson		Mississippi	https://www.gem.wiki/Chevron_Oil_power_station	L100000402094	G100000403187	US8425871071	1	303	303	30	2034	2074	2114	223018	229243	222038	201957	219064	219064	219064	219064	219064	219064	219064	219064
oil/gas	United States	Americas	Northern America	Cleveland County generating facility	1			184	operating	2012		GT	NG/FO					Southern Power Co [100.0%]	Southern Co [100.0%]	35.1705	-81.4167	exact	Kings Mountain	Cleveland		North Carolina	https://www.gem.wiki/Cleveland_County_generating_facility	L100000402282	G100000403518	US8425871071	1	2208		12	2052	2092	2132	406291	417631	404505	367922	399087	399087	399087	399087	399087	399087	399087	399087
oil/gas	United States	Americas	Northern America	Cleveland County generating facility	2			184	operating	2012		GT	NG/FO					Southern Power Co [100.0%]	Southern Co [100.0%]	35.1705	-81.4167	exact	Kings Mountain	Cleveland		North Carolina	https://www.gem.wiki/Cleveland_County_generating_facility	L100000402282	G100000403519	US8425871071	1	2208		12	2052	2092	2132	406291	417631	404505	367922	399087	399087	399087	399087	399087	399087	399087	399087
oil/gas	United States	Americas	Northern America	Cleveland County generating facility	3			184	operating	2012		GT	NG/FO					Southern Power Co [100.0%]	Southern Co [100.0%]	35.1705	-81.4167	exact	Kings Mountain	Cleveland		North Carolina	https://www.gem.wiki/Cleveland_County_generating_facility	L100000402282	G100000403520	US8425871071	1	2208		12	2052	2092	2132	406291	417631	404505	367922	399087	399087	399087	399087	399087	399087	399087	399087
oil/gas	United States	Americas	Northern America	Cleveland County generating facility	4			184	operating	2012		GT	NG/FO					Southern Power Co [100.0%]	Southern Co [100.0%]	35.1705	-81.4167	exact	Kings Mountain	Cleveland		North Carolina	https://www.gem.wiki/Cleveland_County_generating_facility	L100000402282	G100000403521	US8425871071	1	2208	2208	12	2052	2092	2132	406291	417631	404505	367922	399087	399087	399087	399087	399087	399087	399087	399087
oil/gas	United States	Americas	Northern America	Dahlberg power station	1			92	operating	2000		GT	NG/FO					Southern Power Co [100.0%]	Southern Co [100.0%]	34.0423	-83.3977	exact	Nicholson	Jackson		Georgia	https://www.gem.wiki/Dahlberg_power_station	L100000402283	G100000403522	US8425871071	1	2760		24	2040	2080	2120	203145	208816	202253	183961	199544	199544	199544	199544	199544	199544	199544	199544
oil/gas	United States	Americas	Northern America	Dahlberg power station	2			92	operating	2000		GT	NG/FO					Southern Power Co [100.0%]	Southern Co [100.0%]	34.0423	-83.3977	exact	Nicholson	Jackson		Georgia	https://www.gem.wiki/Dahlberg_power_station	L100000402283	G100000403524	US8425871071	1	2760		24	2040	2080	2120	203145	208816	202253	183961	199544	199544	199544	199544	199544	199544	199544	199544
oil/gas	United States	Americas	Northern America	Dahlberg power station	3			92	operating	2000		GT	NG/FO					Southern Power Co [100.0%]	Southern Co [100.0%]	34.0423	-83.3977	exact	Nicholson	Jackson		Georgia	https://www.gem.wiki/Dahlberg_power_station	L100000402283	G100000403525	US8425871071	1	2760		24	2040	2080	2120	203145	208816	202253	183961	199544	199544	199544	199544	199544	199544	199544	199544
oil/gas	United States	Americas	Northern America	Dahlberg power station	4			92	operating	2000		GT	NG/FO					Southern Power Co [100.0%]	Southern Co [100.0%]	34.0423	-83.3977	exact	Nicholson	Jackson		Georgia	https://www.gem.wiki/Dahlberg_power_station	L100000402283	G100000403526	US8425871071	1	2760		24	2040	2080	2120	203145	208816	202253	183961	199544	199544	199544	199544	199544	199544	199544	199544
oil/gas	United States	Americas	Northern America	Dahlberg power station	5			92	operating	2000		GT	NG/FO					Southern Power Co [100.0%]	Southern Co [100.0%]	34.0423	-83.3977	exact	Nicholson	Jackson		Georgia	https://www.gem.wiki/Dahlberg_power_station	L100000402283	G100000403527	US8425871071	1	2760		24	2040	2080	2120	203145	208816	202253	183961	199544	199544	199544	199544	199544	199544	199544	199544
oil/gas	United States	Americas	Northern America	Dahlberg power station	6			92	operating	2000		GT	NG/FO					Southern Power Co [100.0%]	Southern Co [100.0%]	34.0423	-83.3977	exact	Nicholson	Jackson		Georgia	https://www.gem.wiki/Dahlberg_power_station	L100000402283	G100000403528	US8425871071	1	2760		24	2040	2080	2120	203145	208816	202253	183961	199544	199544	199544	199544	199544	199544	199544	199544
oil/gas	United States	Americas	Northern America	Dahlberg power station	7			92	operating	2000		GT	NG/FO					Southern Power Co [100.0%]	Southern Co [100.0%]	34.0423	-83.3977	exact	Nicholson	Jackson		Georgia	https://www.gem.wiki/Dahlberg_power_station	L100000402283	G100000403529	US8425871071	1	2760		24	2040	2080	2120	203145	208816	202253	183961	199544	199544	199544	199544	199544	199544	199544	199544
oil/gas	United States	Americas	Northern America	Dahlberg power station	8			92	operating	2000		GT	NG/FO					Southern Power Co [100.0%]	Southern Co [100.0%]	34.0423	-83.3977	exact	Nicholson	Jackson		Georgia	https://www.gem.wiki/Dahlberg_power_station	L100000402283	G100000403530	US8425871071	1	2760		24	2040	2080	2120	203145	208816	202253	183961	199544	199544	199544	199544	199544	199544	199544	199544
oil/gas	United States	Americas	Northern America	Dahlberg power station	9			92	operating	2001		GT	NG/FO					Southern Power Co [100.0%]	Southern Co [100.0%]	34.0423	-83.3977	exact	Nicholson	Jackson		Georgia	https://www.gem.wiki/Dahlberg_power_station	L100000402283	G100000403531	US8425871071	1	2760		23	2041	2081	2121	203145	208816	202253	183961	199544	199544	199544	199544	199544	199544	199544	199544
oil/gas	United States	Americas	Northern America	Dahlberg power station	10			92	operating	2001		GT	NG/FO					Southern Power Co [100.0%]	Southern Co [100.0%]	34.0423	-83.3977	exact	Nicholson	Jackson		Georgia	https://www.gem.wiki/Dahlberg_power_station	L100000402283	G100000403523	US8425871071	1	2760	2760	23	2041	2081	2121	203145	208816	202253	183961	199544	199544	199544	199544	199544	199544	199544	199544
oil/gas	United States	Americas	Northern America	E B Harris Electric generating plant	G103			652	operating	2003		CC	NG					Southern Power Co [100.0%]	Southern Co [100.0%]	32.3814	-86.5744	exact	Autaugaville	Autauga		Alabama	https://www.gem.wiki/E_B_Harris_Electric_generating_plant	L100000402284	G100000402182	US8425871071	1	3912		21	2043	2083	2123	1.43968e+06	1.47987e+06	1.43336e+06	1.30372e+06	1.41416e+06	1.41416e+06	1.41416e+06	1.41416e+06	1.41416e+06	1.41416e+06	1.41416e+06	1.41416e+06
oil/gas	United States	Americas	Northern America	E B Harris Electric generating plant	G104			652	operating	2003		CC	NG					Southern Power Co [100.0%]	Southern Co [100.0%]	32.3814	-86.5744	exact	Autaugaville	Autauga		Alabama	https://www.gem.wiki/E_B_Harris_Electric_generating_plant	L100000402284	G100000402183	US8425871071	1	3912	3912	21	2043	2083	2123	1.43968e+06	1.47987e+06	1.43336e+06	1.30372e+06	1.41416e+06	1.41416e+06	1.41416e+06	1.41416e+06	1.41416e+06	1.41416e+06	1.41416e+06	1.41416e+06
oil/gas	United States	Americas	Northern America	Edward L. Addison generating plant	712			175	operating	2000		GT	NG/FO					Southern Power Co [100.0%]	Southern Co [100.0%]	32.9111	-84.3064	exact	Thomaston	Upson		Georgia	https://www.gem.wiki/Edward_L._Addison_generating_plant	L100000402285	G100000403532	US8425871071	1	2100		24	2040	2080	2120	386418	397204	384720	349926	379567	379567	379567	379567	379567	379567	379567	379567
oil/gas	United States	Americas	Northern America	Edward L. Addison generating plant	713			175	operating	2000		GT	NG/FO					Southern Power Co [100.0%]	Southern Co [100.0%]	32.9111	-84.3064	exact	Thomaston	Upson		Georgia	https://www.gem.wiki/Edward_L._Addison_generating_plant	L100000402285	G100000403533	US8425871071	1	2100		24	2040	2080	2120	386418	397204	384720	349926	379567	379567	379567	379567	379567	379567	379567	379567
oil/gas	United States	Americas	Northern America	Edward L. Addison generating plant	714			175	operating	2000		GT	NG/FO					Southern Power Co [100.0%]	Southern Co [100.0%]	32.9111	-84.3064	exact	Thomaston	Upson		Georgia	https://www.gem.wiki/Edward_L._Addison_generating_plant	L100000402285	G100000403534	US8425871071	1	2100		24	2040	2080	2120	386418	397204	384720	349926	379567	379567	379567	379567	379567	379567	379567	379567
oil/gas	United States	Americas	Northern America	Edward L. Addison generating plant	715			175	operating	2000		GT	NG/FO					Southern Power Co [100.0%]	Southern Co [100.0%]	32.9111	-84.3064	exact	Thomaston	Upson		Georgia	https://www.gem.wiki/Edward_L._Addison_generating_plant	L100000402285	G100000403535	US8425871071	1	2100	2100	24	2040	2080	2120	386418	397204	384720	349926	379567	379567	379567	379567	379567	379567	379567	379567
oil/gas	United States	Americas	Northern America	Gadsden Steam Plant	1			69	retired	2015	2023	ST	NG					Alabama Power Co [100.0%]	Southern Co [100.0%]	34.0128	-85.9708	exact	Gadsden	Etowah		Alabama	https://www.gem.wiki/Gadsden_Steam_Plant	L100000103779	G100000402402	US8425871071	1	414		9	2055	2095	2135	152359	156612	151689	0	0	0	0	0	0	0	0	0
oil/gas	United States	Americas	Northern America	Gadsden Steam Plant	2			69	retired	2015	2023	ST	NG					Alabama Power Co [100.0%]	Southern Co [100.0%]	34.0128	-85.9708	exact	Gadsden	Etowah		Alabama	https://www.gem.wiki/Gadsden_Steam_Plant	L100000103779	G100000402403	US8425871071	1	414	414	9	2055	2095	2135	152359	156612	151689	0	0	0	0	0	0	0	0	0
oil/gas	United States	Americas	Northern America	Gaston Steam Plant	1		E.C. Gaston Steam Plant	272	operating	2015	2028	ST	NG/C					Alabama Power Co [50.0%]; Georgia Power Co [50.0%]	Southern Co [50.0%]; Southern Co [50.0%]	33.2442	-86.4581	exact	Wilsonville	Shelby		Alabama	https://www.gem.wiki/Gaston_Steam_Plant	L100000103780	G100000402200	US8425871071	0.5	8895		9	2055	2095	2135	300302	308684	298982	271942	294978	294978	294978	294978	294978	294978	294978	294978
oil/gas	United States	Americas	Northern America	Gaston Steam Plant	2		E.C. Gaston Steam Plant	272	operating	2015	2028	ST	NG/C					Alabama Power Co [50.0%]; Georgia Power Co [50.0%]	Southern Co [50.0%]; Southern Co [50.0%]	33.2442	-86.4581	exact	Wilsonville	Shelby		Alabama	https://www.gem.wiki/Gaston_Steam_Plant	L100000103780	G100000402201	US8425871071	0.5	8895		9	2055	2095	2135	300302	308684	298982	271942	294978	294978	294978	294978	294978	294978	294978	294978
oil/gas	United States	Americas	Northern America	Gaston Steam Plant	3		E.C. Gaston Steam Plant	272	operating	2015	2028	ST	NG/C					Alabama Power Co [50.0%]; Georgia Power Co [50.0%]	Southern Co [50.0%]; Southern Co [50.0%]	33.2442	-86.4581	exact	Wilsonville	Shelby		Alabama	https://www.gem.wiki/Gaston_Steam_Plant	L100000103780	G100000402202	US8425871071	0.5	8895		9	2055	2095	2135	300302	308684	298982	271942	294978	294978	294978	294978	294978	294978	294978	294978
oil/gas	United States	Americas	Northern America	Gaston Steam Plant	ST4		E.C. Gaston Steam Plant	245	operating	2015	2028	ST	NG/C					Alabama Power Co [50.0%]; Georgia Power Co [50.0%]	Southern Co [50.0%]; Southern Co [50.0%]	33.2442	-86.4581	exact	Wilsonville	Shelby		Alabama	https://www.gem.wiki/Gaston_Steam_Plant	L100000103780	G100000402203	US8425871071	0.5	8895		9	2055	2095	2135	270492	278043	269304	244948	265697	265697	265697	265697	265697	265697	265697	265697
oil/gas	United States	Americas	Northern America	Gaston Steam Plant	5		E.C. Gaston Steam Plant	952	announced	2028		ST	NG					Alabama Power Co [50.0%]; Georgia Power Co [50.0%]	Southern Co [50.0%]; Southern Co [50.0%]	33.2442	-86.4581	exact	Wilsonville	Shelby		Alabama	https://www.gem.wiki/Gaston_Steam_Plant	L100000103780	G100000410528	US8425871071	0.5	8895	8895	-4	2068	2108	2148	0	0	0	0	0	0	0	0	1.03242e+06	1.03242e+06	1.03242e+06	1.03242e+06
oil/gas	United States	Americas	Northern America	General Electric Plastic power station	G524			97	operating	1999		CC	NG					Alabama Power Co [100.0%]	Southern Co [100.0%]	32.3102	-86.5254	exact	Burkeville	Lowndes		Alabama	https://www.gem.wiki/General_Electric_Plastic_power_station	L100000401697	G100000402163	US8425871071	1	291	291	25	2039	2079	2119	214186	220164	213245	193959	210388	210388	210388	210388	210388	210388	210388	210388
oil/gas	United States	Americas	Northern America	Greene County Steam Plant	GT3			80	operating	1995		GT	FO/NG					Alabama Power Co [100.0%]	Southern Co [100.0%]	32.6017	-87.7811	exact	Demopolis	Greene		Alabama	https://www.gem.wiki/Greene_County_Steam_Plant	L100000103782	G100000402406	US8425871071	1	3864		29	2035	2075	2115	3585.9	3351.21	4969.61	2452.84	3589.89	3589.89	3589.89	3589.89	3589.89	3589.89	3589.89	3589.89
oil/gas	United States	Americas	Northern America	Greene County Steam Plant	GT4			80	operating	1995		GT	FO/NG					Alabama Power Co [100.0%]	Southern Co [100.0%]	32.6017	-87.7811	exact	Demopolis	Greene		Alabama	https://www.gem.wiki/Greene_County_Steam_Plant	L100000103782	G100000402407	US8425871071	1	3864		29	2035	2075	2115	3585.9	3351.21	4969.61	2452.84	3589.89	3589.89	3589.89	3589.89	3589.89	3589.89	3589.89	3589.89
oil/gas	United States	Americas	Northern America	Greene County Steam Plant	GT5			80	operating	1995		GT	FO/NG					Alabama Power Co [100.0%]	Southern Co [100.0%]	32.6017	-87.7811	exact	Demopolis	Greene		Alabama	https://www.gem.wiki/Greene_County_Steam_Plant	L100000103782	G100000402408	US8425871071	1	3864		29	2035	2075	2115	3585.9	3351.21	4969.61	2452.84	3589.89	3589.89	3589.89	3589.89	3589.89	3589.89	3589.89	3589.89
oil/gas	United States	Americas	Northern America	Greene County Steam Plant	GT6			80	operating	1995		GT	FO/NG					Alabama Power Co [100.0%]	Southern Co [100.0%]	32.6017	-87.7811	exact	Demopolis	Greene		Alabama	https://www.gem.wiki/Greene_County_Steam_Plant	L100000103782	G100000402409	US8425871071	1	3864		29	2035	2075	2115	3585.9	3351.21	4969.61	2452.84	3589.89	3589.89	3589.89	3589.89	3589.89	3589.89	3589.89	3589.89
oil/gas	United States	Americas	Northern America	Greene County Steam Plant	GT7			80	operating	1995		GT	FO/NG					Alabama Power Co [100.0%]	Southern Co [100.0%]	32.6017	-87.7811	exact	Demopolis	Greene		Alabama	https://www.gem.wiki/Greene_County_Steam_Plant	L100000103782	G100000402410	US8425871071	1	3864		29	2035	2075	2115	3585.9	3351.21	4969.61	2452.84	3589.89	3589.89	3589.89	3589.89	3589.89	3589.89	3589.89	3589.89
oil/gas	United States	Americas	Northern America	Greene County Steam Plant	GT10			80	operating	1996		GT	FO/NG					Alabama Power Co [100.0%]	Southern Co [100.0%]	32.6017	-87.7811	exact	Demopolis	Greene		Alabama	https://www.gem.wiki/Greene_County_Steam_Plant	L100000103782	G100000402404	US8425871071	1	3864		28	2036	2076	2116	3585.9	3351.21	4969.61	2452.84	3589.89	3589.89	3589.89	3589.89	3589.89	3589.89	3589.89	3589.89
oil/gas	United States	Americas	Northern America	Greene County Steam Plant	GT2			80	operating	1996		GT	FO/NG					Alabama Power Co [100.0%]	Southern Co [100.0%]	32.6017	-87.7811	exact	Demopolis	Greene		Alabama	https://www.gem.wiki/Greene_County_Steam_Plant	L100000103782	G100000402405	US8425871071	1	3864		28	2036	2076	2116	3585.9	3351.21	4969.61	2452.84	3589.89	3589.89	3589.89	3589.89	3589.89	3589.89	3589.89	3589.89
oil/gas	United States	Americas	Northern America	Greene County Steam Plant	GT8			80	operating	1996		GT	FO/NG					Alabama Power Co [100.0%]	Southern Co [100.0%]	32.6017	-87.7811	exact	Demopolis	Greene		Alabama	https://www.gem.wiki/Greene_County_Steam_Plant	L100000103782	G100000402411	US8425871071	1	3864		28	2036	2076	2116	3585.9	3351.21	4969.61	2452.84	3589.89	3589.89	3589.89	3589.89	3589.89	3589.89	3589.89	3589.89
oil/gas	United States	Americas	Northern America	Greene County Steam Plant	GT9			80	operating	1996		GT	FO/NG					Alabama Power Co [100.0%]	Southern Co [100.0%]	32.6017	-87.7811	exact	Demopolis	Greene		Alabama	https://www.gem.wiki/Greene_County_Steam_Plant	L100000103782	G100000402412	US8425871071	1	3864		28	2036	2076	2116	3585.9	3351.21	4969.61	2452.84	3589.89	3589.89	3589.89	3589.89	3589.89	3589.89	3589.89	3589.89
oil/gas	United States	Americas	Northern America	Greene County Steam Plant	1			299	operating	2016		ST	NG					Alabama Power Co [60.0%]; Mississippi Power Co [40.0%]	Southern Co [60.0%]; Southern Co [40.0%]	32.6017	-87.7811	exact	Demopolis	Greene		Alabama	https://www.gem.wiki/Greene_County_Steam_Plant	L100000103782	G100000402204	US8425871071	0.6	3864		8	2056	2096	2136	396133	407191	394393	358724	389110	389110	389110	389110	389110	389110	389110	389110
oil/gas	United States	Americas	Northern America	Greene County Steam Plant	2			269	operating	2016		ST	NG					Alabama Power Co [60.0%]; Mississippi Power Co [40.0%]	Southern Co [60.0%]; Southern Co [40.0%]	32.6017	-87.7811	exact	Demopolis	Greene		Alabama	https://www.gem.wiki/Greene_County_Steam_Plant	L100000103782	G100000402205	US8425871071	0.6	3864	3864	8	2056	2096	2136	356387	366335	354821	322732	350069	350069	350069	350069	350069	350069	350069	350069
oil/gas	United States	Americas	Northern America	H Allen Franklin Combined Cycle power station	G481			620	operating	2002		CC	NG					Southern Power Co [100.0%]	Southern Co [100.0%]	32.6078	-85.0975	exact	Smiths	Lee		Alabama	https://www.gem.wiki/H_Allen_Franklin_Combined_Cycle_power_station	L100000402286	G100000402166	US8425871071	1	5988		22	2042	2082	2122	1.36902e+06	1.40724e+06	1.36301e+06	1.23974e+06	1.34475e+06	1.34475e+06	1.34475e+06	1.34475e+06	1.34475e+06	1.34475e+06	1.34475e+06	1.34475e+06
oil/gas	United States	Americas	Northern America	H Allen Franklin Combined Cycle power station	G501			688	operating	2002		CC	NG					Southern Power Co [100.0%]	Southern Co [100.0%]	32.6078	-85.0975	exact	Smiths	Lee		Alabama	https://www.gem.wiki/H_Allen_Franklin_Combined_Cycle_power_station	L100000402286	G100000402167	US8425871071	1	5988		22	2042	2082	2122	1.51917e+06	1.56158e+06	1.5125e+06	1.37571e+06	1.49224e+06	1.49224e+06	1.49224e+06	1.49224e+06	1.49224e+06	1.49224e+06	1.49224e+06	1.49224e+06
oil/gas	United States	Americas	Northern America	H Allen Franklin Combined Cycle power station	G100			688	operating	2008		CC	NG					Southern Power Co [100.0%]	Southern Co [100.0%]	32.6078	-85.0975	exact	Smiths	Lee		Alabama	https://www.gem.wiki/H_Allen_Franklin_Combined_Cycle_power_station	L100000402286	G100000402165	US8425871071	1	5988	5988	16	2048	2088	2128	1.51917e+06	1.56158e+06	1.5125e+06	1.37571e+06	1.49224e+06	1.49224e+06	1.49224e+06	1.49224e+06	1.49224e+06	1.49224e+06	1.49224e+06	1.49224e+06
oil/gas	United States	Americas	Northern America	Intercession City power station	P11			148.5	operating	1997		GT	FO					Duke Energy Florida LLC [66.7%]; Georgia Power Co [33.3%]	Duke Energy Corp [66.7%]; Southern Co [33.3%]	28.2628	-81.5486	exact	Intercession City	Osceola		Florida	https://www.gem.wiki/Intercession_City_power_station	L100000401869	G100000414252	US8425871071	0.333	445.5	445.5	27	2037	2077	2117	2216.55	2071.49	3071.87	1516.18	2219.02	2219.02	2219.02	2219.02	2219.02	2219.02	2219.02	2219.02
oil/gas	United States	Americas	Northern America	Jack Watson Generating Plant	4			299	operating	2015	2023	ST	NG					Mississippi Power Co [100.0%]	Southern Co [100.0%]	30.4392	-89.0286	exact	Gulfport	Harrison		Mississippi	https://www.gem.wiki/Jack_Watson_Generating_Plant	L100000104009	G100000403188	US8425871071	1	2631		9	2055	2095	2135	660222	678651	657321	597873	648517	648517	648517	648517	648517	648517	648517	648517
oil/gas	United States	Americas	Northern America	Jack Watson Generating Plant	5			578	operating	2015		ST	NG					Mississippi Power Co [100.0%]	Southern Co [100.0%]	30.4392	-89.0286	exact	Gulfport	Harrison		Mississippi	https://www.gem.wiki/Jack_Watson_Generating_Plant	L100000104009	G100000403189	US8425871071	1	2631	2631	9	2055	2095	2135	1.27628e+06	1.31191e+06	1.27067e+06	1.15575e+06	1.25365e+06	1.25365e+06	1.25365e+06	1.25365e+06	1.25365e+06	1.25365e+06	1.25365e+06	1.25365e+06
oil/gas	United States	Americas	Northern America	McDonough Steam Generating Plant	G104		Atkinson power station/Jack McDonough Steam Generating Plant	922	operating	2011		CC	NG/FO					Georgia Power Co [100.0%]	Southern Co [100.0%]	33.8239	-84.4758	exact	Smyrna	Cobb		Georgia	https://www.gem.wiki/McDonough_Steam_Generating_Plant	L100000103842	G100000402137	US8425871071	1	8298		13	2051	2091	2131	2.03587e+06	2.0927e+06	2.02692e+06	1.84361e+06	1.99977e+06	1.99977e+06	1.99977e+06	1.99977e+06	1.99977e+06	1.99977e+06	1.99977e+06	1.99977e+06
oil/gas	United States	Americas	Northern America	McDonough Steam Generating Plant	G105		Atkinson power station/Jack McDonough Steam Generating Plant	922	operating	2012		CC	NG/FO					Georgia Power Co [100.0%]	Southern Co [100.0%]	33.8239	-84.4758	exact	Smyrna	Cobb		Georgia	https://www.gem.wiki/McDonough_Steam_Generating_Plant	L100000103842	G100000402138	US8425871071	1	8298		12	2052	2092	2132	2.03587e+06	2.0927e+06	2.02692e+06	1.84361e+06	1.99977e+06	1.99977e+06	1.99977e+06	1.99977e+06	1.99977e+06	1.99977e+06	1.99977e+06	1.99977e+06
oil/gas	United States	Americas	Northern America	McDonough Steam Generating Plant	G106		Atkinson power station/Jack McDonough Steam Generating Plant	922	operating	2012		CC	NG/FO					Georgia Power Co [100.0%]	Southern Co [100.0%]	33.8239	-84.4758	exact	Smyrna	Cobb		Georgia	https://www.gem.wiki/McDonough_Steam_Generating_Plant	L100000103842	G100000402139	US8425871071	1	8298	8298	12	2052	2092	2132	2.03587e+06	2.0927e+06	2.02692e+06	1.84361e+06	1.99977e+06	1.99977e+06	1.99977e+06	1.99977e+06	1.99977e+06	1.99977e+06	1.99977e+06	1.99977e+06
oil/gas	United States	Americas	Northern America	McIntosh Combined Cycle Facility	G110			688	operating	2005		CC	NG					Georgia Power Co [100.0%]	Southern Co [100.0%]	32.3478	-81.1817	exact	Rincon	Effingham		Georgia	https://www.gem.wiki/McIntosh_Combined_Cycle_Facility	L100000401979	G100000402001	US8425871071	1	4128		19	2045	2085	2125	1.51917e+06	1.56158e+06	1.5125e+06	1.37571e+06	1.49224e+06	1.49224e+06	1.49224e+06	1.49224e+06	1.49224e+06	1.49224e+06	1.49224e+06	1.49224e+06
oil/gas	United States	Americas	Northern America	McIntosh Combined Cycle Facility	G111			688	operating	2005		CC	NG					Georgia Power Co [100.0%]	Southern Co [100.0%]	32.3478	-81.1817	exact	Rincon	Effingham		Georgia	https://www.gem.wiki/McIntosh_Combined_Cycle_Facility	L100000401979	G100000402002	US8425871071	1	4128	4128	19	2045	2085	2125	1.51917e+06	1.56158e+06	1.5125e+06	1.37571e+06	1.49224e+06	1.49224e+06	1.49224e+06	1.49224e+06	1.49224e+06	1.49224e+06	1.49224e+06	1.49224e+06
oil/gas	United States	Americas	Northern America	McIntosh Steam Plant	CT3			101	operating	1994		GT	NG/FO					Georgia Power Co [100.0%]	Southern Co [100.0%]	32.3563	-81.1684	exact	Rincon	Effingham		Georgia	https://www.gem.wiki/McIntosh_Steam_Plant	L100000103843	G100000402947	US8425871071	1	2424		30	2034	2074	2114	223018	229243	222038	201957	219064	219064	219064	219064	219064	219064	219064	219064
oil/gas	United States	Americas	Northern America	McIntosh Steam Plant	CT4			101	operating	1994		GT	NG/FO					Georgia Power Co [100.0%]	Southern Co [100.0%]	32.3563	-81.1684	exact	Rincon	Effingham		Georgia	https://www.gem.wiki/McIntosh_Steam_Plant	L100000103843	G100000402948	US8425871071	1	2424		30	2034	2074	2114	223018	229243	222038	201957	219064	219064	219064	219064	219064	219064	219064	219064
oil/gas	United States	Americas	Northern America	McIntosh Steam Plant	CT5			101	operating	1994		GT	NG/FO					Georgia Power Co [100.0%]	Southern Co [100.0%]	32.3563	-81.1684	exact	Rincon	Effingham		Georgia	https://www.gem.wiki/McIntosh_Steam_Plant	L100000103843	G100000402949	US8425871071	1	2424		30	2034	2074	2114	223018	229243	222038	201957	219064	219064	219064	219064	219064	219064	219064	219064
oil/gas	United States	Americas	Northern America	McIntosh Steam Plant	CT6			101	operating	1994		GT	NG/FO					Georgia Power Co [100.0%]	Southern Co [100.0%]	32.3563	-81.1684	exact	Rincon	Effingham		Georgia	https://www.gem.wiki/McIntosh_Steam_Plant	L100000103843	G100000402950	US8425871071	1	2424		30	2034	2074	2114	223018	229243	222038	201957	219064	219064	219064	219064	219064	219064	219064	219064
oil/gas	United States	Americas	Northern America	McIntosh Steam Plant	CT7			101	operating	1994		GT	NG/FO					Georgia Power Co [100.0%]	Southern Co [100.0%]	32.3563	-81.1684	exact	Rincon	Effingham		Georgia	https://www.gem.wiki/McIntosh_Steam_Plant	L100000103843	G100000402951	US8425871071	1	2424		30	2034	2074	2114	223018	229243	222038	201957	219064	219064	219064	219064	219064	219064	219064	219064
oil/gas	United States	Americas	Northern America	McIntosh Steam Plant	CT8			101	operating	1994		GT	NG/FO					Georgia Power Co [100.0%]	Southern Co [100.0%]	32.3563	-81.1684	exact	Rincon	Effingham		Georgia	https://www.gem.wiki/McIntosh_Steam_Plant	L100000103843	G100000402952	US8425871071	1	2424		30	2034	2074	2114	223018	229243	222038	201957	219064	219064	219064	219064	219064	219064	219064	219064
oil/gas	United States	Americas	Northern America	McIntosh Steam Plant	CT1			101	operating	1995		GT	NG/FO					Georgia Power Co [100.0%]	Southern Co [100.0%]	32.3563	-81.1684	exact	Rincon	Effingham		Georgia	https://www.gem.wiki/McIntosh_Steam_Plant	L100000103843	G100000402945	US8425871071	1	2424		29	2035	2075	2115	223018	229243	222038	201957	219064	219064	219064	219064	219064	219064	219064	219064
oil/gas	United States	Americas	Northern America	McIntosh Steam Plant	CT2			101	operating	1995		GT	NG/FO					Georgia Power Co [100.0%]	Southern Co [100.0%]	32.3563	-81.1684	exact	Rincon	Effingham		Georgia	https://www.gem.wiki/McIntosh_Steam_Plant	L100000103843	G100000402946	US8425871071	1	2424	2424	29	2035	2075	2115	223018	229243	222038	201957	219064	219064	219064	219064	219064	219064	219064	219064
oil/gas	United States	Americas	Northern America	McManus power station	3A			55.4	operating	1972		GT	FO					Georgia Power Co [100.0%]	Southern Co [100.0%]	31.2136	-81.5462	exact	Brunswick	Glynn		Georgia	https://www.gem.wiki/McManus_power_station	L100000409266	G100000414239	US8425871071	1	1674		52	2012	2052	2092	2483.23	2320.71	3441.45	1698.59	2486	2486	2486	2486	2486	2486	2486	2486
oil/gas	United States	Americas	Northern America	McManus power station	3B			55.4	operating	1972		GT	FO					Georgia Power Co [100.0%]	Southern Co [100.0%]	31.2136	-81.5462	exact	Brunswick	Glynn		Georgia	https://www.gem.wiki/McManus_power_station	L100000409266	G100000414238	US8425871071	1	1674		52	2012	2052	2092	2483.23	2320.71	3441.45	1698.59	2486	2486	2486	2486	2486	2486	2486	2486
oil/gas	United States	Americas	Northern America	McManus power station	3C			55.4	operating	1972		GT	FO					Georgia Power Co [100.0%]	Southern Co [100.0%]	31.2136	-81.5462	exact	Brunswick	Glynn		Georgia	https://www.gem.wiki/McManus_power_station	L100000409266	G100000414237	US8425871071	1	1674		52	2012	2052	2092	2483.23	2320.71	3441.45	1698.59	2486	2486	2486	2486	2486	2486	2486	2486
oil/gas	United States	Americas	Northern America	McManus power station	4A			65.3	operating	1972		GT	FO					Georgia Power Co [100.0%]	Southern Co [100.0%]	31.2136	-81.5462	exact	Brunswick	Glynn		Georgia	https://www.gem.wiki/McManus_power_station	L100000409266	G100000414236	US8425871071	1	1674		52	2012	2052	2092	2926.99	2735.42	4056.44	2002.13	2930.25	2930.25	2930.25	2930.25	2930.25	2930.25	2930.25	2930.25
oil/gas	United States	Americas	Northern America	McManus power station	4B			65.3	operating	1972		GT	FO					Georgia Power Co [100.0%]	Southern Co [100.0%]	31.2136	-81.5462	exact	Brunswick	Glynn		Georgia	https://www.gem.wiki/McManus_power_station	L100000409266	G100000414235	US8425871071	1	1674		52	2012	2052	2092	2926.99	2735.42	4056.44	2002.13	2930.25	2930.25	2930.25	2930.25	2930.25	2930.25	2930.25	2930.25
oil/gas	United States	Americas	Northern America	McManus power station	4C			65.3	operating	1972		GT	FO					Georgia Power Co [100.0%]	Southern Co [100.0%]	31.2136	-81.5462	exact	Brunswick	Glynn		Georgia	https://www.gem.wiki/McManus_power_station	L100000409266	G100000414234	US8425871071	1	1674		52	2012	2052	2092	2926.99	2735.42	4056.44	2002.13	2930.25	2930.25	2930.25	2930.25	2930.25	2930.25	2930.25	2930.25
oil/gas	United States	Americas	Northern America	McManus power station	4D			65.3	operating	1972		GT	FO					Georgia Power Co [100.0%]	Southern Co [100.0%]	31.2136	-81.5462	exact	Brunswick	Glynn		Georgia	https://www.gem.wiki/McManus_power_station	L100000409266	G100000414233	US8425871071	1	1674		52	2012	2052	2092	2926.99	2735.42	4056.44	2002.13	2930.25	2930.25	2930.25	2930.25	2930.25	2930.25	2930.25	2930.25
oil/gas	United States	Americas	Northern America	McManus power station	4E			65.3	operating	1972		GT	FO					Georgia Power Co [100.0%]	Southern Co [100.0%]	31.2136	-81.5462	exact	Brunswick	Glynn		Georgia	https://www.gem.wiki/McManus_power_station	L100000409266	G100000414232	US8425871071	1	1674		52	2012	2052	2092	2926.99	2735.42	4056.44	2002.13	2930.25	2930.25	2930.25	2930.25	2930.25	2930.25	2930.25	2930.25
oil/gas	United States	Americas	Northern America	McManus power station	4F			65.3	operating	1972		GT	FO					Georgia Power Co [100.0%]	Southern Co [100.0%]	31.2136	-81.5462	exact	Brunswick	Glynn		Georgia	https://www.gem.wiki/McManus_power_station	L100000409266	G100000414231	US8425871071	1	1674	1674	52	2012	2052	2092	2926.99	2735.42	4056.44	2002.13	2930.25	2930.25	2930.25	2930.25	2930.25	2930.25	2930.25	2930.25
oil/gas	United States	Americas	Northern America	Ratcliffe power plant	1			840	operating	2014		CC	NG					Mississippi Power Co [100.0%]	Southern Co [100.0%]	32.6547	-88.7622	exact	De Kalb	Kemper		Mississippi	https://www.gem.wiki/Ratcliffe_power_plant	L100000402096	G100000402041	US8425871071	1	2520	2520	10	2054	2094	2134	1.8548e+06	1.90658e+06	1.84665e+06	1.67964e+06	1.82192e+06	1.82192e+06	1.82192e+06	1.82192e+06	1.82192e+06	1.82192e+06	1.82192e+06	1.82192e+06
oil/gas	United States	Americas	Northern America	Robins power station	1			92	operating	1995		GT	NG/FO					Georgia Power Co [100.0%]	Southern Co [100.0%]	32.5792	-83.5822	exact	Robins AFB	Houston		Georgia	https://www.gem.wiki/Robins_power_station	L100000401980	G100000402953	US8425871071	1	552		29	2035	2075	2115	203145	208816	202253	183961	199544	199544	199544	199544	199544	199544	199544	199544
oil/gas	United States	Americas	Northern America	Robins power station	2			92	operating	1995		GT	NG/FO					Georgia Power Co [100.0%]	Southern Co [100.0%]	32.5792	-83.5822	exact	Robins AFB	Houston		Georgia	https://www.gem.wiki/Robins_power_station	L100000401980	G100000402954	US8425871071	1	552	552	29	2035	2075	2115	203145	208816	202253	183961	199544	199544	199544	199544	199544	199544	199544	199544
oil/gas	United States	Americas	Northern America	Rowan power station	1			199	operating	2001		GT	FO/NG					Southern Power Co [100.0%]	Southern Co [100.0%]	35.7314	-80.6019	exact	Salisbury	Rowan		North Carolina	https://www.gem.wiki/Rowan_power_station	L100000402288	G100000403536	US8425871071	1	3573		23	2041	2081	2121	8919.91	8336.13	12361.9	6101.45	8929.85	8929.85	8929.85	8929.85	8929.85	8929.85	8929.85	8929.85
oil/gas	United States	Americas	Northern America	Rowan power station	2			199	operating	2001		GT	FO/NG					Southern Power Co [100.0%]	Southern Co [100.0%]	35.7314	-80.6019	exact	Salisbury	Rowan		North Carolina	https://www.gem.wiki/Rowan_power_station	L100000402288	G100000403537	US8425871071	1	3573		23	2041	2081	2121	8919.91	8336.13	12361.9	6101.45	8929.85	8929.85	8929.85	8929.85	8929.85	8929.85	8929.85	8929.85
oil/gas	United States	Americas	Northern America	Rowan power station	3			199	operating	2001		GT	FO/NG					Southern Power Co [100.0%]	Southern Co [100.0%]	35.7314	-80.6019	exact	Salisbury	Rowan		North Carolina	https://www.gem.wiki/Rowan_power_station	L100000402288	G100000403538	US8425871071	1	3573		23	2041	2081	2121	8919.91	8336.13	12361.9	6101.45	8929.85	8929.85	8929.85	8929.85	8929.85	8929.85	8929.85	8929.85
oil/gas	United States	Americas	Northern America	Rowan power station	G102			594	operating	2003		CC	NG/FO					Southern Power Co [100.0%]	Southern Co [100.0%]	35.7314	-80.6019	exact	Salisbury	Rowan		North Carolina	https://www.gem.wiki/Rowan_power_station	L100000402288	G100000402174	US8425871071	1	3573	3573	21	2043	2083	2123	1.31161e+06	1.34822e+06	1.30585e+06	1.18775e+06	1.28836e+06	1.28836e+06	1.28836e+06	1.28836e+06	1.28836e+06	1.28836e+06	1.28836e+06	1.28836e+06
oil/gas	United States	Americas	Northern America	Tenaska Central Alabama generating station	STG1			927	operating	2003		CC	NG/FO					Alabama Power Co [100.0%]	Southern Co [100.0%]	32.6497	-86.74	exact	Billingsley	Autauga		Alabama	https://www.gem.wiki/Tenaska_Central_Alabama_generating_station	L100000401620	G100000401923	US8425871071	1	2781	2781	21	2043	2083	2123	2.04691e+06	2.10405e+06	2.03791e+06	1.85361e+06	2.01062e+06	2.01062e+06	2.01062e+06	2.01062e+06	2.01062e+06	2.01062e+06	2.01062e+06	2.01062e+06
oil/gas	United States	Americas	Northern America	Theodore cogeneration facility	G525			317	operating	2000		CC	NG					Alabama Power Co [100.0%]	Southern Co [100.0%]	30.5254	-88.1285	exact	Theodore	Mobile		Alabama	https://www.gem.wiki/Theodore_cogeneration_facility	L100000401698	G100000402168	US8425871071	1	951	951	24	2040	2080	2120	699968	719506	696892	633866	687558	687558	687558	687558	687558	687558	687558	687558
oil/gas	United States	Americas	Northern America	Victor J Daniel Jr power station	3		Plant Daniel	566	operating	2001		CC	NG					Mississippi Power Co [100.0%]	Southern Co [100.0%]	30.5322	-88.5553	exact	Escatawpa	Jackson		Mississippi	https://www.gem.wiki/Victor_J_Daniel_Jr_power_station	L100000402097	G100000402099	US8425871071	1	3396		23	2041	2081	2121	1.24978e+06	1.28467e+06	1.24429e+06	1.13176e+06	1.22763e+06	1.22763e+06	1.22763e+06	1.22763e+06	1.22763e+06	1.22763e+06	1.22763e+06	1.22763e+06
oil/gas	United States	Americas	Northern America	Victor J Daniel Jr power station	4		Plant Daniel	566	operating	2001		CC	NG					Mississippi Power Co [100.0%]	Southern Co [100.0%]	30.5322	-88.5553	exact	Escatawpa	Jackson		Mississippi	https://www.gem.wiki/Victor_J_Daniel_Jr_power_station	L100000402097	G100000402100	US8425871071	1	3396	3396	23	2041	2081	2121	1.24978e+06	1.28467e+06	1.24429e+06	1.13176e+06	1.22763e+06	1.22763e+06	1.22763e+06	1.22763e+06	1.22763e+06	1.22763e+06	1.22763e+06	1.22763e+06
oil/gas	United States	Americas	Northern America	Wansley Plant	G106			620	operating	2002		CC	NG					Southern Power Co [100.0%]	Southern Co [100.0%]	33.4064	-85.037	exact	Franklin	Heard		Georgia	https://www.gem.wiki/Wansley_Plant	L100000103848	G100000401986	US8425871071	1	9432		22	2042	2082	2122	1.36902e+06	1.40724e+06	1.36301e+06	1.23974e+06	1.34475e+06	1.34475e+06	1.34475e+06	1.34475e+06	1.34475e+06	1.34475e+06	1.34475e+06	1.34475e+06
oil/gas	United States	Americas	Northern America	Wansley Plant	G107			620	operating	2002		CC	NG					Southern Power Co [100.0%]	Southern Co [100.0%]	33.4064	-85.037	exact	Franklin	Heard		Georgia	https://www.gem.wiki/Wansley_Plant	L100000103848	G100000401987	US8425871071	1	9432	9432	22	2042	2082	2122	1.36902e+06	1.40724e+06	1.36301e+06	1.23974e+06	1.34475e+06	1.34475e+06	1.34475e+06	1.34475e+06	1.34475e+06	1.34475e+06	1.34475e+06	1.34475e+06
oil/gas	United States	Americas	Northern America	Wansley power station	5A			52.8	retired	1980	2022	GT	FO					Georgia Power Co [53.5%]; Oglethorpe Power Corp [30.0%]; Municipal Electric Authority of Georgia [15.1%]; Dalton Utilities [1.4%]	Southern Co [53.5%]; Municipal Electric Authority of Georgia [15.1%]	33.4134	-85.0323	exact	Roopville	Heard		Georgia	https://www.gem.wiki/Wansley_power_station	L100000409254	G100000414179	US8425871071	0.535	158.4	158.4	44	2020	2060	2100	1266.18	1183.31	0	0	0	0	0	0	0	0	0	0
oil/gas	United States	Americas	Northern America	Washington County cogeneration facility (AL)	G523			123	operating	1999		CC	NG					Alabama Power Co [100.0%]	Southern Co [100.0%]	31.2504	-88.0156	exact	McIntosh	Washington		Alabama	https://www.gem.wiki/Washington_County_cogeneration_facility_(AL)	L100000401699	G100000402162	US8425871071	1	369	369	25	2039	2079	2119	271596	279178	270403	245948	266781	266781	266781	266781	266781	266781	266781	266781
oil/gas	United States	Americas	Northern America	Wilson power station	5A			52.5	operating	1972		GT	FO					Georgia Power Co [100.0%]	Southern Co [100.0%]	33.1377	-81.7483	exact	Waynesboro	Burke		Georgia	https://www.gem.wiki/Wilson_Station	L100000409274	G100000414112	US8425871071	1	945		52	2012	2052	2092	2353.24	2199.23	3261.31	1609.68	2355.86	2355.86	2355.86	2355.86	2355.86	2355.86	2355.86	2355.86
oil/gas	United States	Americas	Northern America	Wilson power station	5B			52.5	operating	1972		GT	FO					Georgia Power Co [100.0%]	Southern Co [100.0%]	33.1377	-81.7483	exact	Waynesboro	Burke		Georgia	https://www.gem.wiki/Wilson_Station	L100000409274	G100000414111	US8425871071	1	945		52	2012	2052	2092	2353.24	2199.23	3261.31	1609.68	2355.86	2355.86	2355.86	2355.86	2355.86	2355.86	2355.86	2355.86
oil/gas	United States	Americas	Northern America	Wilson power station	5C			52.5	operating	1972		GT	FO					Georgia Power Co [100.0%]	Southern Co [100.0%]	33.1377	-81.7483	exact	Waynesboro	Burke		Georgia	https://www.gem.wiki/Wilson_Station	L100000409274	G100000414110	US8425871071	1	945		52	2012	2052	2092	2353.24	2199.23	3261.31	1609.68	2355.86	2355.86	2355.86	2355.86	2355.86	2355.86	2355.86	2355.86
oil/gas	United States	Americas	Northern America	Wilson power station	5D			52.5	operating	1973		GT	FO					Georgia Power Co [100.0%]	Southern Co [100.0%]	33.1377	-81.7483	exact	Waynesboro	Burke		Georgia	https://www.gem.wiki/Wilson_Station	L100000409274	G100000414109	US8425871071	1	945		51	2013	2053	2093	2353.24	2199.23	3261.31	1609.68	2355.86	2355.86	2355.86	2355.86	2355.86	2355.86	2355.86	2355.86
oil/gas	United States	Americas	Northern America	Wilson power station	5E			52.5	operating	1973		GT	FO					Georgia Power Co [100.0%]	Southern Co [100.0%]	33.1377	-81.7483	exact	Waynesboro	Burke		Georgia	https://www.gem.wiki/Wilson_Station	L100000409274	G100000414108	US8425871071	1	945		51	2013	2053	2093	2353.24	2199.23	3261.31	1609.68	2355.86	2355.86	2355.86	2355.86	2355.86	2355.86	2355.86	2355.86
oil/gas	United States	Americas	Northern America	Wilson power station	5F			52.5	operating	1973		GT	FO					Georgia Power Co [100.0%]	Southern Co [100.0%]	33.1377	-81.7483	exact	Waynesboro	Burke		Georgia	https://www.gem.wiki/Wilson_power_station	L100000409274	G100000414107	US8425871071	1	945	945	51	2013	2053	2093	2353.24	2199.23	3261.31	1609.68	2355.86	2355.86	2355.86	2355.86	2355.86	2355.86	2355.86	2355.86
oil/gas	United States	Americas	Northern America	Yates Steam Generating Plant	6			404	operating	2015		ST	NG					Georgia Power Co [100.0%]	Southern Co [100.0%]	33.4622	-84.8986	exact	Newnan	Coweta		Georgia	https://www.gem.wiki/Yates_Steam_Generating_Plant	L100000103850	G100000402955	US8425871071	1	2424		9	2055	2095	2135	892073	916973	888153	807829	876257	876257	876257	876257	876257	876257	876257	876257
oil/gas	United States	Americas	Northern America	Yates Steam Generating Plant	7			404	operating	2015		ST	NG					Georgia Power Co [100.0%]	Southern Co [100.0%]	33.4622	-84.8986	exact	Newnan	Coweta		Georgia	https://www.gem.wiki/Yates_Steam_Generating_Plant	L100000103850	G100000402956	US8425871071	1	2424	2424	9	2055	2095	2135	892073	916973	888153	807829	876257	876257	876257	876257	876257	876257	876257	876257
																																					TOTAL Carbon Emissions	82.4846	99.2776	94.7169	91.1401	90.9138	90.9138	90.9138	90.9138	92.7053	92.7053	92.7053	92.7053
																																					COAL	37.7102	53.2629	50.1013	49.3457	45.5531	45.5531	45.5531	45.5531	45.5531	45.5531	45.5531	45.5531
																																					GAS	44.6727	45.9197	44.4764	41.7257	45.2602	45.2602	45.2602	45.2602	47.0517	47.0517	47.0517	47.0517
																																					OIL	0.0426138	0.0398249	0.0573027	0.0282828	0.0413937	0.0413937	0.0413937	0.0413937	0.0413937	0.0413937	0.0413937	0.0413937
																																					OIL&GAS	44.7744	46.0147	44.6156	41.7944	45.3607	45.3607	45.3607	45.3607	47.1522	47.1522	47.1522	47.1522
Type	Country/area	Region	Subregion	Plant / Project name	Unit / Phase name	Plant / Project name (local)	Plant / Project name (other)	Capacity (MW)	Status	Start year	Retired year	Technology	Fuel	Country/area 1 (hydropower only)	Country/area 2 (hydropower only)	Country/area 1 Capacity (MW) (hydropower only)	Country/area 2 Capacity (MW) (hydropower only)	Owner	Parent	Latitude	Longitude	Location accuracy	City	Local area (taluk, county)	Major area (prefecture, district)	Subnational unit (state, province)	GEM.Wiki URL	GEM location ID	GEM unit/phase ID	CompISIN	Ownership	Plant capacity	Plant capacity	Age	Reinvestment year	Reinvestment year	Reinvestment year	2020	2021	2022	2023	2024	2025	2026	2027	2028	2029	2030	2031
coal	United States	Americas	Northern America	Barry Steam Plant	Unit 4			403.7	operating	1969	2028	subcritical	bituminous					Alabama Power [100%]	Southern Co [100.0%]	31.0066	-88.0088	exact	Bucks	Mobile		Alabama	https://www.gem.wiki/Barry_Steam_Plant	L100000103776	G100000100647	US8425871071	1	11077.5		55	2009	2049	2089	1.34838e+06	1.90449e+06	1.9691e+06	1.9394e+06	1.79034e+06	1.79034e+06	1.79034e+06	1.79034e+06	0	0	0	0
coal	United States	Americas	Northern America	Barry Steam Plant	Unit 5			788.8	operating	1971	2028	supercritical	bituminous					Alabama Power [100%]	Southern Co [100.0%]	31.0066	-88.0088	exact	Bucks	Mobile		Alabama	https://www.gem.wiki/Barry_Steam_Plant	L100000103776	G100000100648	US8425871071	1	11077.5	11077.5	53	2011	2051	2091	2.63463e+06	3.72123e+06	3.84747e+06	3.78944e+06	3.49819e+06	3.49819e+06	3.49819e+06	3.49819e+06	0	0	0	0
coal	United States	Americas	Northern America	Daniel Generating Plant	Unit 1		Victor J. Daniel Generating Plant	500	operating	1977	2024	subcritical	bituminous					Florida Power & Light [50%]; Mississippi Power [50%]	NextEra Energy Inc [50.0%]; Southern Co [50.0%]	30.5327	-88.5571	exact	Escatawpa	Jackson		Mississippi	https://www.gem.wiki/Daniel_Generating_Plant	L100000104008	G100000101965	US8425871071	0.5	3000		47	2017	2057	2097	835013	1.17939e+06	1.21941e+06	1.20102e+06	0	0	0	0	0	0	0	0
coal	United States	Americas	Northern America	Daniel Generating Plant	Unit 2		Victor J. Daniel Generating Plant	500	operating	1981	2027	subcritical	bituminous					Florida Power & Light [50%]; Mississippi Power [50%]	NextEra Energy Inc [50.0%]; Southern Co [50.0%]	30.5327	-88.5571	exact	Escatawpa	Jackson		Mississippi	https://www.gem.wiki/Daniel_Generating_Plant	L100000104008	G100000101966	US8425871071	0.5	3000	3000	43	2021	2061	2101	835013	1.17939e+06	1.21941e+06	1.20102e+06	1.10871e+06	1.10871e+06	1.10871e+06	0	0	0	0	0
coal	United States	Americas	Northern America	Gaston Steam Plant	Unit 5		EC Gaston power station	952	operating	1974	2028	supercritical	bituminous					Alabama Power [100%]	Southern Co [100.0%]	33.2432	-86.4589	exact	Wilsonville	Shelby		Alabama	https://www.gem.wiki/Gaston_Steam_Plant	L100000103780	G100000102959	US8425871071	1	8895	8895	50	2014	2054	2094	3.17973e+06	4.49114e+06	4.6435e+06	4.57347e+06	4.22196e+06	4.22196e+06	4.22196e+06	4.22196e+06	0	0	0	0
coal	United States	Americas	Northern America	Miller Steam Plant	Unit 1		James H. Miller Jr. Steam Plant	705.5	operating	1978		subcritical	subbituminous					Alabama Power [91%]; PowerSouth Energy Cooperative [8%]	Southern Co [91.8%]; PowerSouth Energy Cooperative [8.2%]	33.6332	-87.0598	exact	West Jefferson	Jefferson		Alabama	https://www.gem.wiki/Miller_Steam_Plant	L100000103783	G100000106922	US8425871071	0.918	8466		46	2018	2058	2098	2.19748e+06	3.10378e+06	3.20908e+06	3.16068e+06	2.91775e+06	2.91775e+06	2.91775e+06	2.91775e+06	2.91775e+06	2.91775e+06	2.91775e+06	2.91775e+06
coal	United States	Americas	Northern America	Miller Steam Plant	Unit 2		James H. Miller Jr. Steam Plant	705.5	operating	1985		subcritical	subbituminous					Alabama Power [91%]; PowerSouth Energy Cooperative [8%]	Southern Co [91.8%]; PowerSouth Energy Cooperative [8.2%]	33.6332	-87.0598	exact	West Jefferson	Jefferson		Alabama	https://www.gem.wiki/Miller_Steam_Plant	L100000103783	G100000106923	US8425871071	0.918	8466		39	2025	2065	2105	2.19748e+06	3.10378e+06	3.20908e+06	3.16068e+06	2.91775e+06	2.91775e+06	2.91775e+06	2.91775e+06	2.91775e+06	2.91775e+06	2.91775e+06	2.91775e+06
coal	United States	Americas	Northern America	Miller Steam Plant	Unit 3		James H. Miller Jr. Steam Plant	705.5	operating	1989		subcritical	subbituminous					Alabama Power [100%]	Southern Co [100.0%]	33.6332	-87.0598	exact	West Jefferson	Jefferson		Alabama	https://www.gem.wiki/Miller_Steam_Plant	L100000103783	G100000106924	US8425871071	1	8466		35	2029	2069	2109	2.39377e+06	3.38103e+06	3.49573e+06	3.44301e+06	3.17838e+06	3.17838e+06	3.17838e+06	3.17838e+06	3.17838e+06	3.17838e+06	3.17838e+06	3.17838e+06
coal	United States	Americas	Northern America	Miller Steam Plant	Unit 4		James H. Miller Jr. Steam Plant	705.5	operating	1991		subcritical	subbituminous					Alabama Power [100%]	Southern Co [100.0%]	33.6332	-87.0598	exact	West Jefferson	Jefferson		Alabama	https://www.gem.wiki/Miller_Steam_Plant	L100000103783	G100000106925	US8425871071	1	8466	8466	33	2031	2071	2111	2.39377e+06	3.38103e+06	3.49573e+06	3.44301e+06	3.17838e+06	3.17838e+06	3.17838e+06	3.17838e+06	3.17838e+06	3.17838e+06	3.17838e+06	3.17838e+06
coal	United States	Americas	Northern America	Plant Bowen	Unit 1			805.8	operating	1971	2028	supercritical	bituminous					Georgia Power [100%]	Southern Co [100.0%]	34.126	-84.9207	exact	Taylorsville	Bartow		Georgia	https://www.gem.wiki/Plant_Bowen	L100000103845	G100000108023	US8425871071	1	10495.8		53	2011	2051	2091	2.69141e+06	3.80143e+06	3.93039e+06	3.87111e+06	3.57358e+06	3.57358e+06	3.57358e+06	3.57358e+06	0	0	0	0
coal	United States	Americas	Northern America	Plant Bowen	Unit 2			788.8	operating	1972	2028	supercritical	bituminous					Georgia Power [100%]	Southern Co [100.0%]	34.126	-84.9207	exact	Taylorsville	Bartow		Georgia	https://www.gem.wiki/Plant_Bowen	L100000103845	G100000108024	US8425871071	1	10495.8		52	2012	2052	2092	2.63463e+06	3.72123e+06	3.84747e+06	3.78944e+06	3.49819e+06	3.49819e+06	3.49819e+06	3.49819e+06	0	0	0	0
coal	United States	Americas	Northern America	Plant Bowen	Unit 3			952	operating	1974	2035	supercritical	bituminous					Georgia Power [100%]	Southern Co [100.0%]	34.126	-84.9207	exact	Taylorsville	Bartow		Georgia	https://www.gem.wiki/Plant_Bowen	L100000103845	G100000108025	US8425871071	1	10495.8		50	2014	2054	2094	3.17973e+06	4.49114e+06	4.6435e+06	4.57347e+06	4.22196e+06	4.22196e+06	4.22196e+06	4.22196e+06	4.22196e+06	4.22196e+06	4.22196e+06	4.22196e+06
coal	United States	Americas	Northern America	Plant Bowen	Unit 4			952	operating	1975	2035	supercritical	bituminous					Georgia Power [100%]	Southern Co [100.0%]	34.126	-84.9207	exact	Taylorsville	Bartow		Georgia	https://www.gem.wiki/Plant_Bowen	L100000103845	G100000108026	US8425871071	1	10495.8	10495.8	49	2015	2055	2095	3.17973e+06	4.49114e+06	4.6435e+06	4.57347e+06	4.22196e+06	4.22196e+06	4.22196e+06	4.22196e+06	4.22196e+06	4.22196e+06	4.22196e+06	4.22196e+06
coal	United States	Americas	Northern America	Red Hills Generation Facility	Unit 1			513.7	operating	2001		subcritical	lignite					S E Choctaw [100%]	Southern Co [100.0%]	33.3762	-89.2185	exact	Red Hills	Choctaw		Mississippi	https://www.gem.wiki/Red_Hills_Generation_Facility	L100000104012	G100000108505	US8425871071	1	1541.1	1541.1	23	2041	2081	2121	1.83186e+06	2.58737e+06	2.67515e+06	2.6348e+06	2.4323e+06	2.4323e+06	2.4323e+06	2.4323e+06	2.4323e+06	2.4323e+06	2.4323e+06	2.4323e+06
coal	United States	Americas	Northern America	Scherer Steam Generating Station	Unit 1			891	operating	1982		subcritical	subbituminous					other unknown/mixed entity types [1%]; Oglethorpe Power [60%]; Municipal Electric Authority of Georgia [30%]; Georgia Power [8%]	Oglethorpe Power [60.0%]; Municipal Electric Authority of Georgia [30.2%]; Southern Co [8.4%]; other unknown/mixed entity types [1.4%]	33.0603	-83.8069	exact	Juliette	Monroe		Georgia	https://www.gem.wiki/Scherer_Steam_Generating_Station	L100000103847	G100000108869	US8425871071	0.084	8019		42	2022	2062	2102	253947	358681	370849	365256	337183	337183	337183	337183	337183	337183	337183	337183
coal	United States	Americas	Northern America	Scherer Steam Generating Station	Unit 2			891	operating	1984		subcritical	subbituminous					Municipal Electric Authority of Georgia [30%]; Oglethorpe Power [60%]; Georgia Power [8%]; other unknown/mixed entity types [1%]	Oglethorpe Power [60.0%]; Municipal Electric Authority of Georgia [30.2%]; Southern Co [8.4%]; other unknown/mixed entity types [1.4%]	33.0603	-83.8069	exact	Juliette	Monroe		Georgia	https://www.gem.wiki/Scherer_Steam_Generating_Station	L100000103847	G100000108870	US8425871071	0.084	8019		40	2024	2064	2104	253947	358681	370849	365256	337183	337183	337183	337183	337183	337183	337183	337183
coal	United States	Americas	Northern America	Scherer Steam Generating Station	Unit 3			891	operating	1987	2028	subcritical	subbituminous					Florida Power & Light [25%]; Georgia Power [75%]	Southern Co [75.0%]; NextEra Energy Inc [25.0%]	33.0603	-83.8069	exact	Juliette	Monroe		Georgia	https://www.gem.wiki/Scherer_Steam_Generating_Station	L100000103847	G100000108871	US8425871071	0.75	8019	8019	37	2027	2067	2107	2.26738e+06	3.20251e+06	3.31115e+06	3.26122e+06	3.01057e+06	3.01057e+06	3.01057e+06	3.01057e+06	0	0	0	0
coal	United States	Americas	Northern America	Wansley Plant	Unit 1			952	retired	1976	2022	supercritical	bituminous					Oglethorpe Power [30%]; Municipal Electric Authority of Georgia [15%]; Georgia Power [53%]; other unknown/mixed entity types [1%]	Southern Co [53.5%]; Oglethorpe Power [30.0%]; Municipal Electric Authority of Georgia [15.1%]; other unknown/mixed entity types [1.4%]	33.4127	-85.0339	exact	Roopville	Heard		Georgia	https://www.gem.wiki/Wansley_Plant	L100000103848	G100000110728	US8425871071	0.535	9432		48	2016	2056	2096	1.70115e+06	2.40276e+06	0	0	0	0	0	0	0	0	0	0
coal	United States	Americas	Northern America	Wansley Plant	Unit 2			952	retired	1978	2022	supercritical	bituminous					Oglethorpe Power [30%]; Municipal Electric Authority of Georgia [15%]; Georgia Power [53%]; other unknown/mixed entity types [1%]	Southern Co [53.5%]; Oglethorpe Power [30.0%]; Municipal Electric Authority of Georgia [15.1%]; other unknown/mixed entity types [1.4%]	33.4127	-85.0339	exact	Roopville	Heard		Georgia	https://www.gem.wiki/Wansley_Plant	L100000103848	G100000110729	US8425871071	0.535	9432	9432	46	2018	2058	2098	1.70115e+06	2.40276e+06	0	0	0	0	0	0	0	0	0	0
oil/gas	United States	Americas	Northern America	Barry Steam Plant	G521		James M. Barry Electric Generating Plant	535	operating	2000		CC	NG					Alabama Power Co [100.0%]	Southern Co [100.0%]	31.0069	-88.0103	exact	Bucks	Mobile		Alabama	https://www.gem.wiki/Barry_Steam_Plant	L100000103776	G100000401686	US8425871071	1	11077.5		24	2040	2080	2120	1.18133e+06	1.21431e+06	1.17614e+06	1.06977e+06	1.16039e+06	1.16039e+06	1.16039e+06	1.16039e+06	1.16039e+06	1.16039e+06	1.16039e+06	1.16039e+06
oil/gas	United States	Americas	Northern America	Barry Steam Plant	G522		James M. Barry Electric Generating Plant	535	operating	2000		CC	NG					Alabama Power Co [100.0%]	Southern Co [100.0%]	31.0069	-88.0103	exact	Bucks	Mobile		Alabama	https://www.gem.wiki/Barry_Steam_Plant	L100000103776	G100000401687	US8425871071	1	11077.5		24	2040	2080	2120	1.18133e+06	1.21431e+06	1.17614e+06	1.06977e+06	1.16039e+06	1.16039e+06	1.16039e+06	1.16039e+06	1.16039e+06	1.16039e+06	1.16039e+06	1.16039e+06
oil/gas	United States	Americas	Northern America	Barry Steam Plant	1		James M. Barry Electric Generating Plant	153	operating	2015		ST	NG					Alabama Power Co [100.0%]	Southern Co [100.0%]	31.0069	-88.0103	exact	Bucks	Mobile		Alabama	https://www.gem.wiki/Barry_Steam_Plant	L100000103776	G100000402400	US8425871071	1	11077.5		9	2055	2095	2135	337839	347270	336355	305935	331850	331850	331850	331850	331850	331850	331850	331850
oil/gas	United States	Americas	Northern America	Barry Steam Plant	2		James M. Barry Electric Generating Plant	153	operating	2015		ST	NG					Alabama Power Co [100.0%]	Southern Co [100.0%]	31.0069	-88.0103	exact	Bucks	Mobile		Alabama	https://www.gem.wiki/Barry_Steam_Plant	L100000103776	G100000402401	US8425871071	1	11077.5		9	2055	2095	2135	337839	347270	336355	305935	331850	331850	331850	331850	331850	331850	331850	331850
oil/gas	United States	Americas	Northern America	Barry Steam Plant	G523		James M. Barry Electric Generating Plant	774	operating	2023		CC	NG					Alabama Power Co [100.0%]	Southern Co [100.0%]	31.0069	-88.0103	exact	Bucks	Mobile		Alabama	https://www.gem.wiki/Barry_Steam_Plant	L100000103776	G100000409443	US8425871071	1	11077.5		1	2063	2103	2143	0	0	0	1.54767e+06	1.67877e+06	1.67877e+06	1.67877e+06	1.67877e+06	1.67877e+06	1.67877e+06	1.67877e+06	1.67877e+06
oil/gas	United States	Americas	Northern America	Barry Steam Plant	4		James M. Barry Electric Generating Plant	350	pre-construction	2028		ST	NG					Alabama Power Co [100.0%]	Southern Co [100.0%]	31.0069	-88.0103	exact	Bucks	Mobile		Alabama	https://www.gem.wiki/Barry_Steam_Plant	L100000103776	G100000410538	US8425871071	1	11077.5	11077.5	-4	2068	2108	2148	0	0	0	0	0	0	0	0	759133	759133	759133	759133
oil/gas	United States	Americas	Northern America	Chevron Oil power station	5			101	operating	1994		GT	NG					Mississippi Power Co [100.0%]	Southern Co [100.0%]	30.34	-88.4919	exact	Pascagoula	Jackson		Mississippi	https://www.gem.wiki/Chevron_Oil_power_station	L100000402094	G100000403187	US8425871071	1	303	303	30	2034	2074	2114	223018	229243	222038	201957	219064	219064	219064	219064	219064	219064	219064	219064
oil/gas	United States	Americas	Northern America	Cleveland County generating facility	1			184	operating	2012		GT	NG/FO					Southern Power Co [100.0%]	Southern Co [100.0%]	35.1705	-81.4167	exact	Kings Mountain	Cleveland		North Carolina	https://www.gem.wiki/Cleveland_County_generating_facility	L100000402282	G100000403518	US8425871071	1	2208		12	2052	2092	2132	406291	417631	404505	367922	399087	399087	399087	399087	399087	399087	399087	399087
oil/gas	United States	Americas	Northern America	Cleveland County generating facility	2			184	operating	2012		GT	NG/FO					Southern Power Co [100.0%]	Southern Co [100.0%]	35.1705	-81.4167	exact	Kings Mountain	Cleveland		North Carolina	https://www.gem.wiki/Cleveland_County_generating_facility	L100000402282	G100000403519	US8425871071	1	2208		12	2052	2092	2132	406291	417631	404505	367922	399087	399087	399087	399087	399087	399087	399087	399087
oil/gas	United States	Americas	Northern America	Cleveland County generating facility	3			184	operating	2012		GT	NG/FO					Southern Power Co [100.0%]	Southern Co [100.0%]	35.1705	-81.4167	exact	Kings Mountain	Cleveland		North Carolina	https://www.gem.wiki/Cleveland_County_generating_facility	L100000402282	G100000403520	US8425871071	1	2208		12	2052	2092	2132	406291	417631	404505	367922	399087	399087	399087	399087	399087	399087	399087	399087
oil/gas	United States	Americas	Northern America	Cleveland County generating facility	4			184	operating	2012		GT	NG/FO					Southern Power Co [100.0%]	Southern Co [100.0%]	35.1705	-81.4167	exact	Kings Mountain	Cleveland		North Carolina	https://www.gem.wiki/Cleveland_County_generating_facility	L100000402282	G100000403521	US8425871071	1	2208	2208	12	2052	2092	2132	406291	417631	404505	367922	399087	399087	399087	399087	399087	399087	399087	399087
oil/gas	United States	Americas	Northern America	Dahlberg power station	1			92	operating	2000		GT	NG/FO					Southern Power Co [100.0%]	Southern Co [100.0%]	34.0423	-83.3977	exact	Nicholson	Jackson		Georgia	https://www.gem.wiki/Dahlberg_power_station	L100000402283	G100000403522	US8425871071	1	2760		24	2040	2080	2120	203145	208816	202253	183961	199544	199544	199544	199544	199544	199544	199544	199544
oil/gas	United States	Americas	Northern America	Dahlberg power station	2			92	operating	2000		GT	NG/FO					Southern Power Co [100.0%]	Southern Co [100.0%]	34.0423	-83.3977	exact	Nicholson	Jackson		Georgia	https://www.gem.wiki/Dahlberg_power_station	L100000402283	G100000403524	US8425871071	1	2760		24	2040	2080	2120	203145	208816	202253	183961	199544	199544	199544	199544	199544	199544	199544	199544
oil/gas	United States	Americas	Northern America	Dahlberg power station	3			92	operating	2000		GT	NG/FO					Southern Power Co [100.0%]	Southern Co [100.0%]	34.0423	-83.3977	exact	Nicholson	Jackson		Georgia	https://www.gem.wiki/Dahlberg_power_station	L100000402283	G100000403525	US8425871071	1	2760		24	2040	2080	2120	203145	208816	202253	183961	199544	199544	199544	199544	199544	199544	199544	199544
oil/gas	United States	Americas	Northern America	Dahlberg power station	4			92	operating	2000		GT	NG/FO					Southern Power Co [100.0%]	Southern Co [100.0%]	34.0423	-83.3977	exact	Nicholson	Jackson		Georgia	https://www.gem.wiki/Dahlberg_power_station	L100000402283	G100000403526	US8425871071	1	2760		24	2040	2080	2120	203145	208816	202253	183961	199544	199544	199544	199544	199544	199544	199544	199544
oil/gas	United States	Americas	Northern America	Dahlberg power station	5			92	operating	2000		GT	NG/FO					Southern Power Co [100.0%]	Southern Co [100.0%]	34.0423	-83.3977	exact	Nicholson	Jackson		Georgia	https://www.gem.wiki/Dahlberg_power_station	L100000402283	G100000403527	US8425871071	1	2760		24	2040	2080	2120	203145	208816	202253	183961	199544	199544	199544	199544	199544	199544	199544	199544
oil/gas	United States	Americas	Northern America	Dahlberg power station	6			92	operating	2000		GT	NG/FO					Southern Power Co [100.0%]	Southern Co [100.0%]	34.0423	-83.3977	exact	Nicholson	Jackson		Georgia	https://www.gem.wiki/Dahlberg_power_station	L100000402283	G100000403528	US8425871071	1	2760		24	2040	2080	2120	203145	208816	202253	183961	199544	199544	199544	199544	199544	199544	199544	199544
oil/gas	United States	Americas	Northern America	Dahlberg power station	7			92	operating	2000		GT	NG/FO					Southern Power Co [100.0%]	Southern Co [100.0%]	34.0423	-83.3977	exact	Nicholson	Jackson		Georgia	https://www.gem.wiki/Dahlberg_power_station	L100000402283	G100000403529	US8425871071	1	2760		24	2040	2080	2120	203145	208816	202253	183961	199544	199544	199544	199544	199544	199544	199544	199544
oil/gas	United States	Americas	Northern America	Dahlberg power station	8			92	operating	2000		GT	NG/FO					Southern Power Co [100.0%]	Southern Co [100.0%]	34.0423	-83.3977	exact	Nicholson	Jackson		Georgia	https://www.gem.wiki/Dahlberg_power_station	L100000402283	G100000403530	US8425871071	1	2760		24	2040	2080	2120	203145	208816	202253	183961	199544	199544	199544	199544	199544	199544	199544	199544
oil/gas	United States	Americas	Northern America	Dahlberg power station	9			92	operating	2001		GT	NG/FO					Southern Power Co [100.0%]	Southern Co [100.0%]	34.0423	-83.3977	exact	Nicholson	Jackson		Georgia	https://www.gem.wiki/Dahlberg_power_station	L100000402283	G100000403531	US8425871071	1	2760		23	2041	2081	2121	203145	208816	202253	183961	199544	199544	199544	199544	199544	199544	199544	199544
oil/gas	United States	Americas	Northern America	Dahlberg power station	10			92	operating	2001		GT	NG/FO					Southern Power Co [100.0%]	Southern Co [100.0%]	34.0423	-83.3977	exact	Nicholson	Jackson		Georgia	https://www.gem.wiki/Dahlberg_power_station	L100000402283	G100000403523	US8425871071	1	2760	2760	23	2041	2081	2121	203145	208816	202253	183961	199544	199544	199544	199544	199544	199544	199544	199544
oil/gas	United States	Americas	Northern America	E B Harris Electric generating plant	G103			652	operating	2003		CC	NG					Southern Power Co [100.0%]	Southern Co [100.0%]	32.3814	-86.5744	exact	Autaugaville	Autauga		Alabama	https://www.gem.wiki/E_B_Harris_Electric_generating_plant	L100000402284	G100000402182	US8425871071	1	3912		21	2043	2083	2123	1.43968e+06	1.47987e+06	1.43336e+06	1.30372e+06	1.41416e+06	1.41416e+06	1.41416e+06	1.41416e+06	1.41416e+06	1.41416e+06	1.41416e+06	1.41416e+06
oil/gas	United States	Americas	Northern America	E B Harris Electric generating plant	G104			652	operating	2003		CC	NG					Southern Power Co [100.0%]	Southern Co [100.0%]	32.3814	-86.5744	exact	Autaugaville	Autauga		Alabama	https://www.gem.wiki/E_B_Harris_Electric_generating_plant	L100000402284	G100000402183	US8425871071	1	3912	3912	21	2043	2083	2123	1.43968e+06	1.47987e+06	1.43336e+06	1.30372e+06	1.41416e+06	1.41416e+06	1.41416e+06	1.41416e+06	1.41416e+06	1.41416e+06	1.41416e+06	1.41416e+06
oil/gas	United States	Americas	Northern America	Edward L. Addison generating plant	712			175	operating	2000		GT	NG/FO					Southern Power Co [100.0%]	Southern Co [100.0%]	32.9111	-84.3064	exact	Thomaston	Upson		Georgia	https://www.gem.wiki/Edward_L._Addison_generating_plant	L100000402285	G100000403532	US8425871071	1	2100		24	2040	2080	2120	386418	397204	384720	349926	379567	379567	379567	379567	379567	379567	379567	379567
oil/gas	United States	Americas	Northern America	Edward L. Addison generating plant	713			175	operating	2000		GT	NG/FO					Southern Power Co [100.0%]	Southern Co [100.0%]	32.9111	-84.3064	exact	Thomaston	Upson		Georgia	https://www.gem.wiki/Edward_L._Addison_generating_plant	L100000402285	G100000403533	US8425871071	1	2100		24	2040	2080	2120	386418	397204	384720	349926	379567	379567	379567	379567	379567	379567	379567	379567
oil/gas	United States	Americas	Northern America	Edward L. Addison generating plant	714			175	operating	2000		GT	NG/FO					Southern Power Co [100.0%]	Southern Co [100.0%]	32.9111	-84.3064	exact	Thomaston	Upson		Georgia	https://www.gem.wiki/Edward_L._Addison_generating_plant	L100000402285	G100000403534	US8425871071	1	2100		24	2040	2080	2120	386418	397204	384720	349926	379567	379567	379567	379567	379567	379567	379567	379567
oil/gas	United States	Americas	Northern America	Edward L. Addison generating plant	715			175	operating	2000		GT	NG/FO					Southern Power Co [100.0%]	Southern Co [100.0%]	32.9111	-84.3064	exact	Thomaston	Upson		Georgia	https://www.gem.wiki/Edward_L._Addison_generating_plant	L100000402285	G100000403535	US8425871071	1	2100	2100	24	2040	2080	2120	386418	397204	384720	349926	379567	379567	379567	379567	379567	379567	379567	379567
oil/gas	United States	Americas	Northern America	Gadsden Steam Plant	1			69	retired	2015	2023	ST	NG					Alabama Power Co [100.0%]	Southern Co [100.0%]	34.0128	-85.9708	exact	Gadsden	Etowah		Alabama	https://www.gem.wiki/Gadsden_Steam_Plant	L100000103779	G100000402402	US8425871071	1	414		9	2055	2095	2135	152359	156612	151689	0	0	0	0	0	0	0	0	0
oil/gas	United States	Americas	Northern America	Gadsden Steam Plant	2			69	retired	2015	2023	ST	NG					Alabama Power Co [100.0%]	Southern Co [100.0%]	34.0128	-85.9708	exact	Gadsden	Etowah		Alabama	https://www.gem.wiki/Gadsden_Steam_Plant	L100000103779	G100000402403	US8425871071	1	414	414	9	2055	2095	2135	152359	156612	151689	0	0	0	0	0	0	0	0	0
oil/gas	United States	Americas	Northern America	Gaston Steam Plant	1		E.C. Gaston Steam Plant	272	operating	2015	2028	ST	NG/C					Alabama Power Co [50.0%]; Georgia Power Co [50.0%]	Southern Co [50.0%]; Southern Co [50.0%]	33.2442	-86.4581	exact	Wilsonville	Shelby		Alabama	https://www.gem.wiki/Gaston_Steam_Plant	L100000103780	G100000402200	US8425871071	0.5	8895		9	2055	2095	2135	300302	308684	298982	271942	294978	294978	294978	294978	294978	294978	294978	294978
oil/gas	United States	Americas	Northern America	Gaston Steam Plant	2		E.C. Gaston Steam Plant	272	operating	2015	2028	ST	NG/C					Alabama Power Co [50.0%]; Georgia Power Co [50.0%]	Southern Co [50.0%]; Southern Co [50.0%]	33.2442	-86.4581	exact	Wilsonville	Shelby		Alabama	https://www.gem.wiki/Gaston_Steam_Plant	L100000103780	G100000402201	US8425871071	0.5	8895		9	2055	2095	2135	300302	308684	298982	271942	294978	294978	294978	294978	294978	294978	294978	294978
oil/gas	United States	Americas	Northern America	Gaston Steam Plant	3		E.C. Gaston Steam Plant	272	operating	2015	2028	ST	NG/C					Alabama Power Co [50.0%]; Georgia Power Co [50.0%]	Southern Co [50.0%]; Southern Co [50.0%]	33.2442	-86.4581	exact	Wilsonville	Shelby		Alabama	https://www.gem.wiki/Gaston_Steam_Plant	L100000103780	G100000402202	US8425871071	0.5	8895		9	2055	2095	2135	300302	308684	298982	271942	294978	294978	294978	294978	294978	294978	294978	294978
oil/gas	United States	Americas	Northern America	Gaston Steam Plant	ST4		E.C. Gaston Steam Plant	245	operating	2015	2028	ST	NG/C					Alabama Power Co [50.0%]; Georgia Power Co [50.0%]	Southern Co [50.0%]; Southern Co [50.0%]	33.2442	-86.4581	exact	Wilsonville	Shelby		Alabama	https://www.gem.wiki/Gaston_Steam_Plant	L100000103780	G100000402203	US8425871071	0.5	8895		9	2055	2095	2135	270492	278043	269304	244948	265697	265697	265697	265697	265697	265697	265697	265697
oil/gas	United States	Americas	Northern America	Gaston Steam Plant	5		E.C. Gaston Steam Plant	952	announced	2028		ST	NG					Alabama Power Co [50.0%]; Georgia Power Co [50.0%]	Southern Co [50.0%]; Southern Co [50.0%]	33.2442	-86.4581	exact	Wilsonville	Shelby		Alabama	https://www.gem.wiki/Gaston_Steam_Plant	L100000103780	G100000410528	US8425871071	0.5	8895	8895	-4	2068	2108	2148	0	0	0	0	0	0	0	0	1.03242e+06	1.03242e+06	1.03242e+06	1.03242e+06
oil/gas	United States	Americas	Northern America	General Electric Plastic power station	G524			97	operating	1999		CC	NG					Alabama Power Co [100.0%]	Southern Co [100.0%]	32.3102	-86.5254	exact	Burkeville	Lowndes		Alabama	https://www.gem.wiki/General_Electric_Plastic_power_station	L100000401697	G100000402163	US8425871071	1	291	291	25	2039	2079	2119	214186	220164	213245	193959	210388	210388	210388	210388	210388	210388	210388	210388
oil/gas	United States	Americas	Northern America	Greene County Steam Plant	GT3			80	operating	1995		GT	FO/NG					Alabama Power Co [100.0%]	Southern Co [100.0%]	32.6017	-87.7811	exact	Demopolis	Greene		Alabama	https://www.gem.wiki/Greene_County_Steam_Plant	L100000103782	G100000402406	US8425871071	1	3864		29	2035	2075	2115	3585.9	3351.21	4969.61	2452.84	3589.89	3589.89	3589.89	3589.89	3589.89	3589.89	3589.89	3589.89
oil/gas	United States	Americas	Northern America	Greene County Steam Plant	GT4			80	operating	1995		GT	FO/NG					Alabama Power Co [100.0%]	Southern Co [100.0%]	32.6017	-87.7811	exact	Demopolis	Greene		Alabama	https://www.gem.wiki/Greene_County_Steam_Plant	L100000103782	G100000402407	US8425871071	1	3864		29	2035	2075	2115	3585.9	3351.21	4969.61	2452.84	3589.89	3589.89	3589.89	3589.89	3589.89	3589.89	3589.89	3589.89
oil/gas	United States	Americas	Northern America	Greene County Steam Plant	GT5			80	operating	1995		GT	FO/NG					Alabama Power Co [100.0%]	Southern Co [100.0%]	32.6017	-87.7811	exact	Demopolis	Greene		Alabama	https://www.gem.wiki/Greene_County_Steam_Plant	L100000103782	G100000402408	US8425871071	1	3864		29	2035	2075	2115	3585.9	3351.21	4969.61	2452.84	3589.89	3589.89	3589.89	3589.89	3589.89	3589.89	3589.89	3589.89
oil/gas	United States	Americas	Northern America	Greene County Steam Plant	GT6			80	operating	1995		GT	FO/NG					Alabama Power Co [100.0%]	Southern Co [100.0%]	32.6017	-87.7811	exact	Demopolis	Greene		Alabama	https://www.gem.wiki/Greene_County_Steam_Plant	L100000103782	G100000402409	US8425871071	1	3864		29	2035	2075	2115	3585.9	3351.21	4969.61	2452.84	3589.89	3589.89	3589.89	3589.89	3589.89	3589.89	3589.89	3589.89
oil/gas	United States	Americas	Northern America	Greene County Steam Plant	GT7			80	operating	1995		GT	FO/NG					Alabama Power Co [100.0%]	Southern Co [100.0%]	32.6017	-87.7811	exact	Demopolis	Greene		Alabama	https://www.gem.wiki/Greene_County_Steam_Plant	L100000103782	G100000402410	US8425871071	1	3864		29	2035	2075	2115	3585.9	3351.21	4969.61	2452.84	3589.89	3589.89	3589.89	3589.89	3589.89	3589.89	3589.89	3589.89
oil/gas	United States	Americas	Northern America	Greene County Steam Plant	GT10			80	operating	1996		GT	FO/NG					Alabama Power Co [100.0%]	Southern Co [100.0%]	32.6017	-87.7811	exact	Demopolis	Greene		Alabama	https://www.gem.wiki/Greene_County_Steam_Plant	L100000103782	G100000402404	US8425871071	1	3864		28	2036	2076	2116	3585.9	3351.21	4969.61	2452.84	3589.89	3589.89	3589.89	3589.89	3589.89	3589.89	3589.89	3589.89
oil/gas	United States	Americas	Northern America	Greene County Steam Plant	GT2			80	operating	1996		GT	FO/NG					Alabama Power Co [100.0%]	Southern Co [100.0%]	32.6017	-87.7811	exact	Demopolis	Greene		Alabama	https://www.gem.wiki/Greene_County_Steam_Plant	L100000103782	G100000402405	US8425871071	1	3864		28	2036	2076	2116	3585.9	3351.21	4969.61	2452.84	3589.89	3589.89	3589.89	3589.89	3589.89	3589.89	3589.89	3589.89
oil/gas	United States	Americas	Northern America	Greene County Steam Plant	GT8			80	operating	1996		GT	FO/NG					Alabama Power Co [100.0%]	Southern Co [100.0%]	32.6017	-87.7811	exact	Demopolis	Greene		Alabama	https://www.gem.wiki/Greene_County_Steam_Plant	L100000103782	G100000402411	US8425871071	1	3864		28	2036	2076	2116	3585.9	3351.21	4969.61	2452.84	3589.89	3589.89	3589.89	3589.89	3589.89	3589.89	3589.89	3589.89
oil/gas	United States	Americas	Northern America	Greene County Steam Plant	GT9			80	operating	1996		GT	FO/NG					Alabama Power Co [100.0%]	Southern Co [100.0%]	32.6017	-87.7811	exact	Demopolis	Greene		Alabama	https://www.gem.wiki/Greene_County_Steam_Plant	L100000103782	G100000402412	US8425871071	1	3864		28	2036	2076	2116	3585.9	3351.21	4969.61	2452.84	3589.89	3589.89	3589.89	3589.89	3589.89	3589.89	3589.89	3589.89
oil/gas	United States	Americas	Northern America	Greene County Steam Plant	1			299	operating	2016		ST	NG					Alabama Power Co [60.0%]; Mississippi Power Co [40.0%]	Southern Co [60.0%]; Southern Co [40.0%]	32.6017	-87.7811	exact	Demopolis	Greene		Alabama	https://www.gem.wiki/Greene_County_Steam_Plant	L100000103782	G100000402204	US8425871071	0.6	3864		8	2056	2096	2136	396133	407191	394393	358724	389110	389110	389110	389110	389110	389110	389110	389110
oil/gas	United States	Americas	Northern America	Greene County Steam Plant	2			269	operating	2016		ST	NG					Alabama Power Co [60.0%]; Mississippi Power Co [40.0%]	Southern Co [60.0%]; Southern Co [40.0%]	32.6017	-87.7811	exact	Demopolis	Greene		Alabama	https://www.gem.wiki/Greene_County_Steam_Plant	L100000103782	G100000402205	US8425871071	0.6	3864	3864	8	2056	2096	2136	356387	366335	354821	322732	350069	350069	350069	350069	350069	350069	350069	350069
oil/gas	United States	Americas	Northern America	H Allen Franklin Combined Cycle power station	G481			620	operating	2002		CC	NG					Southern Power Co [100.0%]	Southern Co [100.0%]	32.6078	-85.0975	exact	Smiths	Lee		Alabama	https://www.gem.wiki/H_Allen_Franklin_Combined_Cycle_power_station	L100000402286	G100000402166	US8425871071	1	5988		22	2042	2082	2122	1.36902e+06	1.40724e+06	1.36301e+06	1.23974e+06	1.34475e+06	1.34475e+06	1.34475e+06	1.34475e+06	1.34475e+06	1.34475e+06	1.34475e+06	1.34475e+06
oil/gas	United States	Americas	Northern America	H Allen Franklin Combined Cycle power station	G501			688	operating	2002		CC	NG					Southern Power Co [100.0%]	Southern Co [100.0%]	32.6078	-85.0975	exact	Smiths	Lee		Alabama	https://www.gem.wiki/H_Allen_Franklin_Combined_Cycle_power_station	L100000402286	G100000402167	US8425871071	1	5988		22	2042	2082	2122	1.51917e+06	1.56158e+06	1.5125e+06	1.37571e+06	1.49224e+06	1.49224e+06	1.49224e+06	1.49224e+06	1.49224e+06	1.49224e+06	1.49224e+06	1.49224e+06
oil/gas	United States	Americas	Northern America	H Allen Franklin Combined Cycle power station	G100			688	operating	2008		CC	NG					Southern Power Co [100.0%]	Southern Co [100.0%]	32.6078	-85.0975	exact	Smiths	Lee		Alabama	https://www.gem.wiki/H_Allen_Franklin_Combined_Cycle_power_station	L100000402286	G100000402165	US8425871071	1	5988	5988	16	2048	2088	2128	1.51917e+06	1.56158e+06	1.5125e+06	1.37571e+06	1.49224e+06	1.49224e+06	1.49224e+06	1.49224e+06	1.49224e+06	1.49224e+06	1.49224e+06	1.49224e+06
oil/gas	United States	Americas	Northern America	Intercession City power station	P11			148.5	operating	1997		GT	FO					Duke Energy Florida LLC [66.7%]; Georgia Power Co [33.3%]	Duke Energy Corp [66.7%]; Southern Co [33.3%]	28.2628	-81.5486	exact	Intercession City	Osceola		Florida	https://www.gem.wiki/Intercession_City_power_station	L100000401869	G100000414252	US8425871071	0.333	445.5	445.5	27	2037	2077	2117	2216.55	2071.49	3071.87	1516.18	2219.02	2219.02	2219.02	2219.02	2219.02	2219.02	2219.02	2219.02
oil/gas	United States	Americas	Northern America	Jack Watson Generating Plant	4			299	operating	2015	2023	ST	NG					Mississippi Power Co [100.0%]	Southern Co [100.0%]	30.4392	-89.0286	exact	Gulfport	Harrison		Mississippi	https://www.gem.wiki/Jack_Watson_Generating_Plant	L100000104009	G100000403188	US8425871071	1	2631		9	2055	2095	2135	660222	678651	657321	597873	648517	648517	648517	648517	648517	648517	648517	648517
oil/gas	United States	Americas	Northern America	Jack Watson Generating Plant	5			578	operating	2015		ST	NG					Mississippi Power Co [100.0%]	Southern Co [100.0%]	30.4392	-89.0286	exact	Gulfport	Harrison		Mississippi	https://www.gem.wiki/Jack_Watson_Generating_Plant	L100000104009	G100000403189	US8425871071	1	2631	2631	9	2055	2095	2135	1.27628e+06	1.31191e+06	1.27067e+06	1.15575e+06	1.25365e+06	1.25365e+06	1.25365e+06	1.25365e+06	1.25365e+06	1.25365e+06	1.25365e+06	1.25365e+06
oil/gas	United States	Americas	Northern America	McDonough Steam Generating Plant	G104		Atkinson power station/Jack McDonough Steam Generating Plant	922	operating	2011		CC	NG/FO					Georgia Power Co [100.0%]	Southern Co [100.0%]	33.8239	-84.4758	exact	Smyrna	Cobb		Georgia	https://www.gem.wiki/McDonough_Steam_Generating_Plant	L100000103842	G100000402137	US8425871071	1	8298		13	2051	2091	2131	2.03587e+06	2.0927e+06	2.02692e+06	1.84361e+06	1.99977e+06	1.99977e+06	1.99977e+06	1.99977e+06	1.99977e+06	1.99977e+06	1.99977e+06	1.99977e+06
oil/gas	United States	Americas	Northern America	McDonough Steam Generating Plant	G105		Atkinson power station/Jack McDonough Steam Generating Plant	922	operating	2012		CC	NG/FO					Georgia Power Co [100.0%]	Southern Co [100.0%]	33.8239	-84.4758	exact	Smyrna	Cobb		Georgia	https://www.gem.wiki/McDonough_Steam_Generating_Plant	L100000103842	G100000402138	US8425871071	1	8298		12	2052	2092	2132	2.03587e+06	2.0927e+06	2.02692e+06	1.84361e+06	1.99977e+06	1.99977e+06	1.99977e+06	1.99977e+06	1.99977e+06	1.99977e+06	1.99977e+06	1.99977e+06
oil/gas	United States	Americas	Northern America	McDonough Steam Generating Plant	G106		Atkinson power station/Jack McDonough Steam Generating Plant	922	operating	2012		CC	NG/FO					Georgia Power Co [100.0%]	Southern Co [100.0%]	33.8239	-84.4758	exact	Smyrna	Cobb		Georgia	https://www.gem.wiki/McDonough_Steam_Generating_Plant	L100000103842	G100000402139	US8425871071	1	8298	8298	12	2052	2092	2132	2.03587e+06	2.0927e+06	2.02692e+06	1.84361e+06	1.99977e+06	1.99977e+06	1.99977e+06	1.99977e+06	1.99977e+06	1.99977e+06	1.99977e+06	1.99977e+06
oil/gas	United States	Americas	Northern America	McIntosh Combined Cycle Facility	G110			688	operating	2005		CC	NG					Georgia Power Co [100.0%]	Southern Co [100.0%]	32.3478	-81.1817	exact	Rincon	Effingham		Georgia	https://www.gem.wiki/McIntosh_Combined_Cycle_Facility	L100000401979	G100000402001	US8425871071	1	4128		19	2045	2085	2125	1.51917e+06	1.56158e+06	1.5125e+06	1.37571e+06	1.49224e+06	1.49224e+06	1.49224e+06	1.49224e+06	1.49224e+06	1.49224e+06	1.49224e+06	1.49224e+06
oil/gas	United States	Americas	Northern America	McIntosh Combined Cycle Facility	G111			688	operating	2005		CC	NG					Georgia Power Co [100.0%]	Southern Co [100.0%]	32.3478	-81.1817	exact	Rincon	Effingham		Georgia	https://www.gem.wiki/McIntosh_Combined_Cycle_Facility	L100000401979	G100000402002	US8425871071	1	4128	4128	19	2045	2085	2125	1.51917e+06	1.56158e+06	1.5125e+06	1.37571e+06	1.49224e+06	1.49224e+06	1.49224e+06	1.49224e+06	1.49224e+06	1.49224e+06	1.49224e+06	1.49224e+06
oil/gas	United States	Americas	Northern America	McIntosh Steam Plant	CT3			101	operating	1994		GT	NG/FO					Georgia Power Co [100.0%]	Southern Co [100.0%]	32.3563	-81.1684	exact	Rincon	Effingham		Georgia	https://www.gem.wiki/McIntosh_Steam_Plant	L100000103843	G100000402947	US8425871071	1	2424		30	2034	2074	2114	223018	229243	222038	201957	219064	219064	219064	219064	219064	219064	219064	219064
oil/gas	United States	Americas	Northern America	McIntosh Steam Plant	CT4			101	operating	1994		GT	NG/FO					Georgia Power Co [100.0%]	Southern Co [100.0%]	32.3563	-81.1684	exact	Rincon	Effingham		Georgia	https://www.gem.wiki/McIntosh_Steam_Plant	L100000103843	G100000402948	US8425871071	1	2424		30	2034	2074	2114	223018	229243	222038	201957	219064	219064	219064	219064	219064	219064	219064	219064
oil/gas	United States	Americas	Northern America	McIntosh Steam Plant	CT5			101	operating	1994		GT	NG/FO					Georgia Power Co [100.0%]	Southern Co [100.0%]	32.3563	-81.1684	exact	Rincon	Effingham		Georgia	https://www.gem.wiki/McIntosh_Steam_Plant	L100000103843	G100000402949	US8425871071	1	2424		30	2034	2074	2114	223018	229243	222038	201957	219064	219064	219064	219064	219064	219064	219064	219064
oil/gas	United States	Americas	Northern America	McIntosh Steam Plant	CT6			101	operating	1994		GT	NG/FO					Georgia Power Co [100.0%]	Southern Co [100.0%]	32.3563	-81.1684	exact	Rincon	Effingham		Georgia	https://www.gem.wiki/McIntosh_Steam_Plant	L100000103843	G100000402950	US8425871071	1	2424		30	2034	2074	2114	223018	229243	222038	201957	219064	219064	219064	219064	219064	219064	219064	219064
oil/gas	United States	Americas	Northern America	McIntosh Steam Plant	CT7			101	operating	1994		GT	NG/FO					Georgia Power Co [100.0%]	Southern Co [100.0%]	32.3563	-81.1684	exact	Rincon	Effingham		Georgia	https://www.gem.wiki/McIntosh_Steam_Plant	L100000103843	G100000402951	US8425871071	1	2424		30	2034	2074	2114	223018	229243	222038	201957	219064	219064	219064	219064	219064	219064	219064	219064
oil/gas	United States	Americas	Northern America	McIntosh Steam Plant	CT8			101	operating	1994		GT	NG/FO					Georgia Power Co [100.0%]	Southern Co [100.0%]	32.3563	-81.1684	exact	Rincon	Effingham		Georgia	https://www.gem.wiki/McIntosh_Steam_Plant	L100000103843	G100000402952	US8425871071	1	2424		30	2034	2074	2114	223018	229243	222038	201957	219064	219064	219064	219064	219064	219064	219064	219064
oil/gas	United States	Americas	Northern America	McIntosh Steam Plant	CT1			101	operating	1995		GT	NG/FO					Georgia Power Co [100.0%]	Southern Co [100.0%]	32.3563	-81.1684	exact	Rincon	Effingham		Georgia	https://www.gem.wiki/McIntosh_Steam_Plant	L100000103843	G100000402945	US8425871071	1	2424		29	2035	2075	2115	223018	229243	222038	201957	219064	219064	219064	219064	219064	219064	219064	219064
oil/gas	United States	Americas	Northern America	McIntosh Steam Plant	CT2			101	operating	1995		GT	NG/FO					Georgia Power Co [100.0%]	Southern Co [100.0%]	32.3563	-81.1684	exact	Rincon	Effingham		Georgia	https://www.gem.wiki/McIntosh_Steam_Plant	L100000103843	G100000402946	US8425871071	1	2424	2424	29	2035	2075	2115	223018	229243	222038	201957	219064	219064	219064	219064	219064	219064	219064	219064
oil/gas	United States	Americas	Northern America	McManus power station	3A			55.4	operating	1972		GT	FO					Georgia Power Co [100.0%]	Southern Co [100.0%]	31.2136	-81.5462	exact	Brunswick	Glynn		Georgia	https://www.gem.wiki/McManus_power_station	L100000409266	G100000414239	US8425871071	1	1674		52	2012	2052	2092	2483.23	2320.71	3441.45	1698.59	2486	2486	2486	2486	2486	2486	2486	2486
oil/gas	United States	Americas	Northern America	McManus power station	3B			55.4	operating	1972		GT	FO					Georgia Power Co [100.0%]	Southern Co [100.0%]	31.2136	-81.5462	exact	Brunswick	Glynn		Georgia	https://www.gem.wiki/McManus_power_station	L100000409266	G100000414238	US8425871071	1	1674		52	2012	2052	2092	2483.23	2320.71	3441.45	1698.59	2486	2486	2486	2486	2486	2486	2486	2486
oil/gas	United States	Americas	Northern America	McManus power station	3C			55.4	operating	1972		GT	FO					Georgia Power Co [100.0%]	Southern Co [100.0%]	31.2136	-81.5462	exact	Brunswick	Glynn		Georgia	https://www.gem.wiki/McManus_power_station	L100000409266	G100000414237	US8425871071	1	1674		52	2012	2052	2092	2483.23	2320.71	3441.45	1698.59	2486	2486	2486	2486	2486	2486	2486	2486
oil/gas	United States	Americas	Northern America	McManus power station	4A			65.3	operating	1972		GT	FO					Georgia Power Co [100.0%]	Southern Co [100.0%]	31.2136	-81.5462	exact	Brunswick	Glynn		Georgia	https://www.gem.wiki/McManus_power_station	L100000409266	G100000414236	US8425871071	1	1674		52	2012	2052	2092	2926.99	2735.42	4056.44	2002.13	2930.25	2930.25	2930.25	2930.25	2930.25	2930.25	2930.25	2930.25
oil/gas	United States	Americas	Northern America	McManus power station	4B			65.3	operating	1972		GT	FO					Georgia Power Co [100.0%]	Southern Co [100.0%]	31.2136	-81.5462	exact	Brunswick	Glynn		Georgia	https://www.gem.wiki/McManus_power_station	L100000409266	G100000414235	US8425871071	1	1674		52	2012	2052	2092	2926.99	2735.42	4056.44	2002.13	2930.25	2930.25	2930.25	2930.25	2930.25	2930.25	2930.25	2930.25
oil/gas	United States	Americas	Northern America	McManus power station	4C			65.3	operating	1972		GT	FO					Georgia Power Co [100.0%]	Southern Co [100.0%]	31.2136	-81.5462	exact	Brunswick	Glynn		Georgia	https://www.gem.wiki/McManus_power_station	L100000409266	G100000414234	US8425871071	1	1674		52	2012	2052	2092	2926.99	2735.42	4056.44	2002.13	2930.25	2930.25	2930.25	2930.25	2930.25	2930.25	2930.25	2930.25
oil/gas	United States	Americas	Northern America	McManus power station	4D			65.3	operating	1972		GT	FO					Georgia Power Co [100.0%]	Southern Co [100.0%]	31.2136	-81.5462	exact	Brunswick	Glynn		Georgia	https://www.gem.wiki/McManus_power_station	L100000409266	G100000414233	US8425871071	1	1674		52	2012	2052	2092	2926.99	2735.42	4056.44	2002.13	2930.25	2930.25	2930.25	2930.25	2930.25	2930.25	2930.25	2930.25
oil/gas	United States	Americas	Northern America	McManus power station	4E			65.3	operating	1972		GT	FO					Georgia Power Co [100.0%]	Southern Co [100.0%]	31.2136	-81.5462	exact	Brunswick	Glynn		Georgia	https://www.gem.wiki/McManus_power_station	L100000409266	G100000414232	US8425871071	1	1674		52	2012	2052	2092	2926.99	2735.42	4056.44	2002.13	2930.25	2930.25	2930.25	2930.25	2930.25	2930.25	2930.25	2930.25
oil/gas	United States	Americas	Northern America	McManus power station	4F			65.3	operating	1972		GT	FO					Georgia Power Co [100.0%]	Southern Co [100.0%]	31.2136	-81.5462	exact	Brunswick	Glynn		Georgia	https://www.gem.wiki/McManus_power_station	L100000409266	G100000414231	US8425871071	1	1674	1674	52	2012	2052	2092	2926.99	2735.42	4056.44	2002.13	2930.25	2930.25	2930.25	2930.25	2930.25	2930.25	2930.25	2930.25
oil/gas	United States	Americas	Northern America	Ratcliffe power plant	1			840	operating	2014		CC	NG					Mississippi Power Co [100.0%]	Southern Co [100.0%]	32.6547	-88.7622	exact	De Kalb	Kemper		Mississippi	https://www.gem.wiki/Ratcliffe_power_plant	L100000402096	G100000402041	US8425871071	1	2520	2520	10	2054	2094	2134	1.8548e+06	1.90658e+06	1.84665e+06	1.67964e+06	1.82192e+06	1.82192e+06	1.82192e+06	1.82192e+06	1.82192e+06	1.82192e+06	1.82192e+06	1.82192e+06
oil/gas	United States	Americas	Northern America	Robins power station	1			92	operating	1995		GT	NG/FO					Georgia Power Co [100.0%]	Southern Co [100.0%]	32.5792	-83.5822	exact	Robins AFB	Houston		Georgia	https://www.gem.wiki/Robins_power_station	L100000401980	G100000402953	US8425871071	1	552		29	2035	2075	2115	203145	208816	202253	183961	199544	199544	199544	199544	199544	199544	199544	199544
oil/gas	United States	Americas	Northern America	Robins power station	2			92	operating	1995		GT	NG/FO					Georgia Power Co [100.0%]	Southern Co [100.0%]	32.5792	-83.5822	exact	Robins AFB	Houston		Georgia	https://www.gem.wiki/Robins_power_station	L100000401980	G100000402954	US8425871071	1	552	552	29	2035	2075	2115	203145	208816	202253	183961	199544	199544	199544	199544	199544	199544	199544	199544
oil/gas	United States	Americas	Northern America	Rowan power station	1			199	operating	2001		GT	FO/NG					Southern Power Co [100.0%]	Southern Co [100.0%]	35.7314	-80.6019	exact	Salisbury	Rowan		North Carolina	https://www.gem.wiki/Rowan_power_station	L100000402288	G100000403536	US8425871071	1	3573		23	2041	2081	2121	8919.91	8336.13	12361.9	6101.45	8929.85	8929.85	8929.85	8929.85	8929.85	8929.85	8929.85	8929.85
oil/gas	United States	Americas	Northern America	Rowan power station	2			199	operating	2001		GT	FO/NG					Southern Power Co [100.0%]	Southern Co [100.0%]	35.7314	-80.6019	exact	Salisbury	Rowan		North Carolina	https://www.gem.wiki/Rowan_power_station	L100000402288	G100000403537	US8425871071	1	3573		23	2041	2081	2121	8919.91	8336.13	12361.9	6101.45	8929.85	8929.85	8929.85	8929.85	8929.85	8929.85	8929.85	8929.85
oil/gas	United States	Americas	Northern America	Rowan power station	3			199	operating	2001		GT	FO/NG					Southern Power Co [100.0%]	Southern Co [100.0%]	35.7314	-80.6019	exact	Salisbury	Rowan		North Carolina	https://www.gem.wiki/Rowan_power_station	L100000402288	G100000403538	US8425871071	1	3573		23	2041	2081	2121	8919.91	8336.13	12361.9	6101.45	8929.85	8929.85	8929.85	8929.85	8929.85	8929.85	8929.85	8929.85
oil/gas	United States	Americas	Northern America	Rowan power station	G102			594	operating	2003		CC	NG/FO					Southern Power Co [100.0%]	Southern Co [100.0%]	35.7314	-80.6019	exact	Salisbury	Rowan		North Carolina	https://www.gem.wiki/Rowan_power_station	L100000402288	G100000402174	US8425871071	1	3573	3573	21	2043	2083	2123	1.31161e+06	1.34822e+06	1.30585e+06	1.18775e+06	1.28836e+06	1.28836e+06	1.28836e+06	1.28836e+06	1.28836e+06	1.28836e+06	1.28836e+06	1.28836e+06
oil/gas	United States	Americas	Northern America	Tenaska Central Alabama generating station	STG1			927	operating	2003		CC	NG/FO					Alabama Power Co [100.0%]	Southern Co [100.0%]	32.6497	-86.74	exact	Billingsley	Autauga		Alabama	https://www.gem.wiki/Tenaska_Central_Alabama_generating_station	L100000401620	G100000401923	US8425871071	1	2781	2781	21	2043	2083	2123	2.04691e+06	2.10405e+06	2.03791e+06	1.85361e+06	2.01062e+06	2.01062e+06	2.01062e+06	2.01062e+06	2.01062e+06	2.01062e+06	2.01062e+06	2.01062e+06
oil/gas	United States	Americas	Northern America	Theodore cogeneration facility	G525			317	operating	2000		CC	NG					Alabama Power Co [100.0%]	Southern Co [100.0%]	30.5254	-88.1285	exact	Theodore	Mobile		Alabama	https://www.gem.wiki/Theodore_cogeneration_facility	L100000401698	G100000402168	US8425871071	1	951	951	24	2040	2080	2120	699968	719506	696892	633866	687558	687558	687558	687558	687558	687558	687558	687558
oil/gas	United States	Americas	Northern America	Victor J Daniel Jr power station	3		Plant Daniel	566	operating	2001		CC	NG					Mississippi Power Co [100.0%]	Southern Co [100.0%]	30.5322	-88.5553	exact	Escatawpa	Jackson		Mississippi	https://www.gem.wiki/Victor_J_Daniel_Jr_power_station	L100000402097	G100000402099	US8425871071	1	3396		23	2041	2081	2121	1.24978e+06	1.28467e+06	1.24429e+06	1.13176e+06	1.22763e+06	1.22763e+06	1.22763e+06	1.22763e+06	1.22763e+06	1.22763e+06	1.22763e+06	1.22763e+06
oil/gas	United States	Americas	Northern America	Victor J Daniel Jr power station	4		Plant Daniel	566	operating	2001		CC	NG					Mississippi Power Co [100.0%]	Southern Co [100.0%]	30.5322	-88.5553	exact	Escatawpa	Jackson		Mississippi	https://www.gem.wiki/Victor_J_Daniel_Jr_power_station	L100000402097	G100000402100	US8425871071	1	3396	3396	23	2041	2081	2121	1.24978e+06	1.28467e+06	1.24429e+06	1.13176e+06	1.22763e+06	1.22763e+06	1.22763e+06	1.22763e+06	1.22763e+06	1.22763e+06	1.22763e+06	1.22763e+06
oil/gas	United States	Americas	Northern America	Wansley Plant	G106			620	operating	2002		CC	NG					Southern Power Co [100.0%]	Southern Co [100.0%]	33.4064	-85.037	exact	Franklin	Heard		Georgia	https://www.gem.wiki/Wansley_Plant	L100000103848	G100000401986	US8425871071	1	9432		22	2042	2082	2122	1.36902e+06	1.40724e+06	1.36301e+06	1.23974e+06	1.34475e+06	1.34475e+06	1.34475e+06	1.34475e+06	1.34475e+06	1.34475e+06	1.34475e+06	1.34475e+06
oil/gas	United States	Americas	Northern America	Wansley Plant	G107			620	operating	2002		CC	NG					Southern Power Co [100.0%]	Southern Co [100.0%]	33.4064	-85.037	exact	Franklin	Heard		Georgia	https://www.gem.wiki/Wansley_Plant	L100000103848	G100000401987	US8425871071	1	9432	9432	22	2042	2082	2122	1.36902e+06	1.40724e+06	1.36301e+06	1.23974e+06	1.34475e+06	1.34475e+06	1.34475e+06	1.34475e+06	1.34475e+06	1.34475e+06	1.34475e+06	1.34475e+06
oil/gas	United States	Americas	Northern America	Wansley power station	5A			52.8	retired	1980	2022	GT	FO					Georgia Power Co [53.5%]; Oglethorpe Power Corp [30.0%]; Municipal Electric Authority of Georgia [15.1%]; Dalton Utilities [1.4%]	Southern Co [53.5%]; Municipal Electric Authority of Georgia [15.1%]	33.4134	-85.0323	exact	Roopville	Heard		Georgia	https://www.gem.wiki/Wansley_power_station	L100000409254	G100000414179	US8425871071	0.535	158.4	158.4	44	2020	2060	2100	1266.18	1183.31	0	0	0	0	0	0	0	0	0	0
oil/gas	United States	Americas	Northern America	Washington County cogeneration facility (AL)	G523			123	operating	1999		CC	NG					Alabama Power Co [100.0%]	Southern Co [100.0%]	31.2504	-88.0156	exact	McIntosh	Washington		Alabama	https://www.gem.wiki/Washington_County_cogeneration_facility_(AL)	L100000401699	G100000402162	US8425871071	1	369	369	25	2039	2079	2119	271596	279178	270403	245948	266781	266781	266781	266781	266781	266781	266781	266781
oil/gas	United States	Americas	Northern America	Wilson power station	5A			52.5	operating	1972		GT	FO					Georgia Power Co [100.0%]	Southern Co [100.0%]	33.1377	-81.7483	exact	Waynesboro	Burke		Georgia	https://www.gem.wiki/Wilson_Station	L100000409274	G100000414112	US8425871071	1	945		52	2012	2052	2092	2353.24	2199.23	3261.31	1609.68	2355.86	2355.86	2355.86	2355.86	2355.86	2355.86	2355.86	2355.86
oil/gas	United States	Americas	Northern America	Wilson power station	5B			52.5	operating	1972		GT	FO					Georgia Power Co [100.0%]	Southern Co [100.0%]	33.1377	-81.7483	exact	Waynesboro	Burke		Georgia	https://www.gem.wiki/Wilson_Station	L100000409274	G100000414111	US8425871071	1	945		52	2012	2052	2092	2353.24	2199.23	3261.31	1609.68	2355.86	2355.86	2355.86	2355.86	2355.86	2355.86	2355.86	2355.86
oil/gas	United States	Americas	Northern America	Wilson power station	5C			52.5	operating	1972		GT	FO					Georgia Power Co [100.0%]	Southern Co [100.0%]	33.1377	-81.7483	exact	Waynesboro	Burke		Georgia	https://www.gem.wiki/Wilson_Station	L100000409274	G100000414110	US8425871071	1	945		52	2012	2052	2092	2353.24	2199.23	3261.31	1609.68	2355.86	2355.86	2355.86	2355.86	2355.86	2355.86	2355.86	2355.86
oil/gas	United States	Americas	Northern America	Wilson power station	5D			52.5	operating	1973		GT	FO					Georgia Power Co [100.0%]	Southern Co [100.0%]	33.1377	-81.7483	exact	Waynesboro	Burke		Georgia	https://www.gem.wiki/Wilson_Station	L100000409274	G100000414109	US8425871071	1	945		51	2013	2053	2093	2353.24	2199.23	3261.31	1609.68	2355.86	2355.86	2355.86	2355.86	2355.86	2355.86	2355.86	2355.86
oil/gas	United States	Americas	Northern America	Wilson power station	5E			52.5	operating	1973		GT	FO					Georgia Power Co [100.0%]	Southern Co [100.0%]	33.1377	-81.7483	exact	Waynesboro	Burke		Georgia	https://www.gem.wiki/Wilson_Station	L100000409274	G100000414108	US8425871071	1	945		51	2013	2053	2093	2353.24	2199.23	3261.31	1609.68	2355.86	2355.86	2355.86	2355.86	2355.86	2355.86	2355.86	2355.86
oil/gas	United States	Americas	Northern America	Wilson power station	5F			52.5	operating	1973		GT	FO					Georgia Power Co [100.0%]	Southern Co [100.0%]	33.1377	-81.7483	exact	Waynesboro	Burke		Georgia	https://www.gem.wiki/Wilson_power_station	L100000409274	G100000414107	US8425871071	1	945	945	51	2013	2053	2093	2353.24	2199.23	3261.31	1609.68	2355.86	2355.86	2355.86	2355.86	2355.86	2355.86	2355.86	2355.86
oil/gas	United States	Americas	Northern America	Yates Steam Generating Plant	6			404	operating	2015		ST	NG					Georgia Power Co [100.0%]	Southern Co [100.0%]	33.4622	-84.8986	exact	Newnan	Coweta		Georgia	https://www.gem.wiki/Yates_Steam_Generating_Plant	L100000103850	G100000402955	US8425871071	1	2424		9	2055	2095	2135	892073	916973	888153	807829	876257	876257	876257	876257	876257	876257	876257	876257
oil/gas	United States	Americas	Northern America	Yates Steam Generating Plant	7			404	operating	2015		ST	NG					Georgia Power Co [100.0%]	Southern Co [100.0%]	33.4622	-84.8986	exact	Newnan	Coweta		Georgia	https://www.gem.wiki/Yates_Steam_Generating_Plant	L100000103850	G100000402956	US8425871071	1	2424	2424	9	2055	2095	2135	892073	916973	888153	807829	876257	876257	876257	876257	876257	876257	876257	876257
																																					TOTAL Carbon Emissions	82.4846	99.2776	94.7169	91.1401	89.8051	89.8051	89.8051	88.6964	70.8951	70.8951	70.8951	70.8951
																																					COAL	37.7102	53.2629	50.1013	49.3457	44.4444	44.4444	44.4444	43.3357	23.7429	23.7429	23.7429	23.7429
																																					GAS	44.6727	45.9197	44.4764	41.7257	45.2602	45.2602	45.2602	45.2602	47.0517	47.0517	47.0517	47.0517
																																					OIL	0.0426138	0.0398249	0.0573027	0.0282828	0.0413937	0.0413937	0.0413937	0.0413937	0.0413937	0.0413937	0.0413937	0.0413937
																																					OIL&GAS	44.7744	46.0147	44.6156	41.7944	45.3607	45.3607	45.3607	45.3607	47.1522	47.1522	47.1522	47.1522
[truncated: 28 more columns]
