# Supplementary material for: Assessing corporate transition plans using a production asset-based planning approach
Source: Research Square preprint supplement (doi:10.21203/rs.3.rs-5245457/v1), 2024-12-09
Supplement: Supplementary file 12 [file 2 EnelSpA.xlsx]

## Sheet: Enel_all
Type	Country/area	Region	Subregion	Plant / Project name	Unit / Phase name	Plant / Project name (local)	Plant / Project name (other)	Capacity (MW)	Status	Start year	Retired year	Technology	Fuel	Country/area 1 (hydropower only)	Country/area 2 (hydropower only)	Country/area 1 Capacity (MW) (hydropower only)	Country/area 2 Capacity (MW) (hydropower only)	Owner	Parent	Latitude	Longitude	Location accuracy	City	Local area (taluk, county)	Major area (prefecture, district)	Subnational unit (state, province)	GEM.Wiki URL	GEM location ID	GEM unit/phase ID	CompISIN	Ownership	Plant capacity	Plant capacity	Age	Reinvestment year	Reinvestment year	Reinvestment year
coal	Italy	Europe	Southern Europe	Andrea Palladio power station	Unit 1		Fusina power station	165	retired	1964	2021	subcritical	bituminous					Enel [100%]	Enel [100.0%]	45.4314	12.2468	exact	Fusina		Venezia	Veneto	https://www.gem.wiki/Andrea_Palladio_power_station	L100000102860	G100000100196	IT0003128367	1	1816		60	2004	2044	2084
coal	Italy	Europe	Southern Europe	Andrea Palladio power station	Unit 2		Fusina power station	171	retired	1969	2021	subcritical	bituminous					Enel [100%]	Enel [100.0%]	45.4314	12.2468	exact	Fusina		Venezia	Veneto	https://www.gem.wiki/Andrea_Palladio_power_station	L100000102860	G100000100197	IT0003128367	1	1816		55	2009	2049	2089
coal	Italy	Europe	Southern Europe	Andrea Palladio power station	Unit 3		Fusina power station	320	retired	1974	2023	subcritical	bituminous					Enel [100%]	Enel [100.0%]	45.4314	12.2468	exact	Fusina		Venezia	Veneto	https://www.gem.wiki/Andrea_Palladio_power_station	L100000102860	G100000100198	IT0003128367	1	1816		50	2014	2054	2094
coal	Italy	Europe	Southern Europe	Andrea Palladio power station	Unit 4		Fusina power station	320	retired	1974	2023	subcritical	bituminous					Enel [100%]	Enel [100.0%]	45.4314	12.2468	exact	Fusina		Venezia	Veneto	https://www.gem.wiki/Andrea_Palladio_power_station	L100000102860	G100000100199	IT0003128367	1	1816	1816	50	2014	2054	2094
coal	Montenegro	Europe	Southern Europe	Bar power station	--			800	cancelled	2014		unknown	unknown					Dufenergy Italia; Enel	Dufenergy Italia; Enel	42.1	19.1	approximate	Bar			Bar	https://www.gem.wiki/Bar_power_station	L100000103050	G100000100584	IT0003128367	0.5	800	800	10	2054	2094	2134
coal	Chile	Americas	Latin America and the Caribbean	Bocamina power station	Unit 1	Termoeléctrica Bocamina		128	retired	1970	2020	subcritical	bituminous					Enel Generación Chile [100%]	Enel Generación Chile [100.0%]	-37.0218	-73.1663	exact	Coronel		Concepción	Biobio Region	https://www.gem.wiki/Bocamina_power_station	L100000100195	G100000100976	IT0003128367	1	478		54	2010	2050	2090
coal	Chile	Americas	Latin America and the Caribbean	Bocamina power station	Unit 2	Termoeléctrica Bocamina		350	retired	2012	2022	subcritical	bituminous					Enel Generación Chile [100%]	Enel Generación Chile [100.0%]	-37.0218	-73.1663	exact	Coronel		Concepción	Biobio Region	https://www.gem.wiki/Bocamina_power_station	L100000100195	G100000100977	IT0003128367	1	478	478	12	2052	2092	2132
coal	Romania	Europe	Eastern Europe	Braila power station	Unit 5			800	cancelled	2013		supercritical	bituminous					Braila Power [100%]	E.ON SE; Enel SpA	45.165	27.9234	exact	Braila			Braila	https://www.gem.wiki/Braila_power_station	L100000103287	G100000101039	IT0003128367	0.5	800	800	11	2053	2093	2133
coal	Italy	Europe	Southern Europe	Brindisi Sud power station	Unit 1		Federico II, Federico 2 (Unit 1), Federico 3 (Unit 2), Federico 4 (Unit 3), Federico 5 (Unit 4)	660	operating	1991	2025	supercritical	bituminous					Enel [100%]	Enel [100.0%]	40.5636	18.0322	exact	Brindisi		Brindisi	Apulia	https://www.gem.wiki/Brindisi_Sud_power_station	L100000102842	G100000101061	IT0003128367	1	4320		33	2031	2071	2111
coal	Italy	Europe	Southern Europe	Brindisi Sud power station	Unit 2		Federico II, Federico 2 (Unit 1), Federico 3 (Unit 2), Federico 4 (Unit 3), Federico 5 (Unit 4)	660	retired	1992	2020	supercritical	bituminous					Enel [100%]	Enel [100.0%]	40.5636	18.0322	exact	Brindisi		Brindisi	Apulia	https://www.gem.wiki/Brindisi_Sud_power_station	L100000102842	G100000101062	IT0003128367	1	4320		32	2032	2072	2112
coal	Italy	Europe	Southern Europe	Brindisi Sud power station	Unit 3		Federico II, Federico 2 (Unit 1), Federico 3 (Unit 2), Federico 4 (Unit 3), Federico 5 (Unit 4)	660	operating	1992	2025	supercritical	bituminous					Enel [100%]	Enel [100.0%]	40.5636	18.0322	exact	Brindisi		Brindisi	Apulia	https://www.gem.wiki/Brindisi_Sud_power_station	L100000102842	G100000101063	IT0003128367	1	4320		32	2032	2072	2112
coal	Italy	Europe	Southern Europe	Brindisi Sud power station	Unit 4		Federico II, Federico 2 (Unit 1), Federico 3 (Unit 2), Federico 4 (Unit 3), Federico 5 (Unit 4)	660	operating	1993	2025	supercritical	bituminous					Enel [100%]	Enel [100.0%]	40.5636	18.0322	exact	Brindisi		Brindisi	Apulia	https://www.gem.wiki/Brindisi_Sud_power_station	L100000102842	G100000101064	IT0003128367	1	4320	4320	31	2033	2073	2113
coal	Italy	Europe	Southern Europe	Enel Genova power station	Unit 3			70	retired	1952	2014	subcritical	bituminous					Enel [100%]	Enel [100.0%]	44.4027	8.90425	exact	Genova		Genova	Liguria	https://www.gem.wiki/Enel_Genova_power_station	L100000102848	G100000102638	IT0003128367	1	295		72	1992	2032	2072
coal	Italy	Europe	Southern Europe	Enel Genova power station	Unit 4			70	retired	1952	2014	subcritical	bituminous					Enel [100%]	Enel [100.0%]	44.4027	8.90425	exact	Genova		Genova	Liguria	https://www.gem.wiki/Enel_Genova_power_station	L100000102848	G100000102639	IT0003128367	1	295		72	1992	2032	2072
coal	Italy	Europe	Southern Europe	Enel Genova power station	Unit 6			155	retired	1960	2017	subcritical	bituminous					Enel [100%]	Enel [100.0%]	44.4027	8.90425	exact	Genova		Genova	Liguria	https://www.gem.wiki/Enel_Genova_power_station	L100000102848	G100000102640	IT0003128367	1	295	295	64	2000	2040	2080
coal	Romania	Europe	Eastern Europe	Galati Power Station	--			800	cancelled	2013		unknown	bituminous					Enel [100%]	Enel [100.0%]	45.4233	28.0425	approximate	Galati			Galati	https://www.gem.wiki/Galati_Power_Station	L100000103292	G100000102903	IT0003128367	1	800	800	11	2053	2093	2133
coal	Italy	Europe	Southern Europe	La Spezia power station	Unit 5			600	retired	1967	2021	supercritical	bituminous					Enel [100%]	Enel [100.0%]	44.1122	9.87505	exact	La Spezia		La Spezia	Liguria	https://www.gem.wiki/La_Spezia_power_station	L100000102849	G100000106077	IT0003128367	1	2122	2122	57	2007	2047	2087
coal	Bulgaria	Europe	Eastern Europe	Maritsa Itzok-3 power station	Unit 5		Maritza East-3 power station	700	cancelled	2011		supercritical	lignite					Enel; Natsionalna Elektricheska Kompania	Bulgarian Energy Holding EAD; Enel	42.1444	26.0033	exact	Galabovo			Stara Zagora	https://www.gem.wiki/Maritsa_Itzok-3_power_station	L100000100144	G100000106685	IT0003128367	0.5	700	700	13	2051	2091	2131
coal	Slovakia	Europe	Eastern Europe	Novaky power station	Phase A Unit 3		Novaky ENO	32	retired	1957	2013	subcritical	lignite					Slovenské Elektrárne [100%]	Ministry of Economy (Slovakia) [34.0%]; Enel SpA [33.0%]; EP Slovakia BV [33.0%]	48.6988	18.5335	exact	Nováky		Prievidza	Trenčín	https://www.gem.wiki/Novaky_power_station	L100000103415	G100000112609	IT0003128367	0.33	472		67	1997	2037	2077
coal	Slovakia	Europe	Eastern Europe	Novaky power station	Phase B Unit 1		Novaky ENO	110	retired	1964	2023	subcritical	lignite					Slovenské Elektrárne [100%]	Ministry of Economy (Slovakia) [34.0%]; Enel SpA [33.0%]; EP Slovakia BV [33.0%]	48.6988	18.5335	exact	Nováky		Prievidza	Trenčín	https://www.gem.wiki/Novaky_power_station	L100000103415	G100000107531	IT0003128367	0.33	472		60	2004	2044	2084
coal	Slovakia	Europe	Eastern Europe	Novaky power station	Phase B Unit 2		Novaky ENO	110	retired	1964	2023	subcritical	lignite					Slovenské Elektrárne [100%]	Ministry of Economy (Slovakia) [34.0%]; Enel SpA [33.0%]; EP Slovakia BV [33.0%]	48.6988	18.5335	exact	Nováky		Prievidza	Trenčín	https://www.gem.wiki/Novaky_power_station	L100000103415	G100000107532	IT0003128367	0.33	472		60	2004	2044	2084
coal	Slovakia	Europe	Eastern Europe	Novaky power station	Phase B Unit 3		Novaky ENO	110	retired	1976	2015	subcritical	lignite					Slovenské Elektrárne [100%]	Ministry of Economy (Slovakia) [34.0%]; Enel SpA [33.0%]; EP Slovakia BV [33.0%]	48.6988	18.5335	exact	Nováky		Prievidza	Trenčín	https://www.gem.wiki/Novaky_power_station	L100000103415	G100000107533	IT0003128367	0.33	472		48	2016	2056	2096
coal	Slovakia	Europe	Eastern Europe	Novaky power station	Phase B Unit 4		Novaky ENO	110	retired	1976	2015	subcritical	lignite					Slovenské Elektrárne [100%]	Ministry of Economy (Slovakia) [34.0%]; Enel SpA [33.0%]; EP Slovakia BV [33.0%]	48.6988	18.5335	exact	Nováky		Prievidza	Trenčín	https://www.gem.wiki/Novaky_power_station	L100000103415	G100000107534	IT0003128367	0.33	472	472	48	2016	2056	2096
coal	Chile	Americas	Latin America and the Caribbean	Patache power station	Unit 1	Central termoeléctrica Tarapacá	Tarapacá power station	154	retired	1998	2019	subcritical	bituminous					Enel Generación Chile [100%]	Enel Generación Chile [100.0%]	-20.8053	-70.1932	exact	Punta Patache		Iquique	Tarapacá Region	https://www.gem.wiki/Patache_power_station	L100000100180	G100000107855	IT0003128367	1	264		26	2038	2078	2118
coal	Chile	Americas	Latin America and the Caribbean	Patache power station	Unit 2	Central termoeléctrica Tarapacá	Tarapacá power station	110	cancelled			subcritical	bituminous					Enel Generación Chile [100%]	Enel Generación Chile [100.0%]	-20.8053	-70.1932	exact	Punta Patache		Iquique	Tarapacá Region	https://www.gem.wiki/Patache_power_station	L100000100180	G100000107856	IT0003128367	1	264	264	-99	40	80	120
coal	Italy	Europe	Southern Europe	Pietrafitta power station	Unit 1			34	retired	1958	2001	subcritical	unknown					Enel [100%]	Enel [100.0%]	42.9954	12.1995	exact	Panicale			Perugia	https://www.gem.wiki/Pietrafitta_power_station	L100000104723	G100000114661	IT0003128367	1	433		66	1998	2038	2078
coal	Italy	Europe	Southern Europe	Pietrafitta power station	Unit 2			34	retired	1958	2001	subcritical	unknown					Enel [100%]	Enel [100.0%]	42.9954	12.1995	exact	Panicale			Perugia	https://www.gem.wiki/Pietrafitta_power_station	L100000104723	G100000114662	IT0003128367	1	433	433	66	1998	2038	2078
coal	Italy	Europe	Southern Europe	Pietro Vannucci power station	Unit 1		Bastardo power station	75	retired	1989	2020	subcritical	bituminous					Enel [100%]	Enel [100.0%]	42.897	12.5383	exact	Gualdo Cattaneo		Perugia	Umbria	https://www.gem.wiki/Pietro_Vannucci_power_station	L100000102859	G100000107978	IT0003128367	1	150		35	2029	2069	2109
coal	Italy	Europe	Southern Europe	Pietro Vannucci power station	Unit 2		Bastardo power station	75	retired	1990	2020	subcritical	bituminous					Enel [100%]	Enel [100.0%]	42.897	12.5383	exact	Gualdo Cattaneo		Perugia	Umbria	https://www.gem.wiki/Pietro_Vannucci_power_station	L100000102859	G100000107979	IT0003128367	1	150	150	34	2030	2070	2110
coal	Italy	Europe	Southern Europe	Porto Marghera Enel power station	Unit 2			70	retired	1952	2015	subcritical	bituminous					Enel [100%]	Enel [100.0%]	45.4594	12.2318	exact	Venezia-Mestre		Venezia	Veneto	https://www.gem.wiki/Porto_Marghera_Enel_power_station	L100000102861	G100000108104	IT0003128367	1	140		72	1992	2032	2072
coal	Italy	Europe	Southern Europe	Porto Marghera Enel power station	Unit 3			70	retired	1956	2015	subcritical	bituminous					Enel [100%]	Enel [100.0%]	45.4594	12.2318	exact	Venezia-Mestre		Venezia	Veneto	https://www.gem.wiki/Porto_Marghera_Enel_power_station	L100000102861	G100000108105	IT0003128367	1	140	140	68	1996	2036	2076
coal	Albania	Europe	Southern Europe	Porto Romano Power Station	Unit 1			800	cancelled			ultra-supercritical	bituminous					Enel [100%]	Enel [100.0%]	41.3711	19.4252	approximate	Porto Romano			Durres	https://www.gem.wiki/Porto_Romano_Power_Station	L100000100001	G100000108106	IT0003128367	1	800	800	-99	40	80	120
coal	Italy	Europe	Southern Europe	Porto Tolle power station	Unit 5RP			660	cancelled	2014		ultra-supercritical	bituminous					Enel [100%]	Enel [100.0%]	44.9497	12.3245	approximate	Porto Tolle			Rovigo	https://www.gem.wiki/Porto_Tolle_power_station	L100000102855	G100000108107	IT0003128367	1	1980		10	2054	2094	2134
coal	Italy	Europe	Southern Europe	Porto Tolle power station	Unit 6RP			660	cancelled	2014		ultra-supercritical	bituminous					Enel [100%]	Enel [100.0%]	44.9497	12.3245	approximate	Porto Tolle			Rovigo	https://www.gem.wiki/Porto_Tolle_power_station	L100000102855	G100000108108	IT0003128367	1	1980		10	2054	2094	2134
coal	Italy	Europe	Southern Europe	Porto Tolle power station	Unit 7RP			660	cancelled	2014		ultra-supercritical	bituminous					Enel [100%]	Enel [100.0%]	44.9497	12.3245	approximate	Porto Tolle			Rovigo	https://www.gem.wiki/Porto_Tolle_power_station	L100000102855	G100000108109	IT0003128367	1	1980	1980	10	2054	2094	2134
coal	Chile	Americas	Latin America and the Caribbean	Punta Alcalde power station	Unit 1	Termoeléctrica Punta Alcalde		370	cancelled			subcritical	subbituminous					Enel Generación Chile [100%]	Enel Generación Chile [100.0%]	-28.5703	-71.3114	approximate	Punta Alcalde			III Region	https://www.gem.wiki/Punta_Alcalde_power_station	L100000100189	G100000108239	IT0003128367	1	740		-99	40	80	120
coal	Chile	Americas	Latin America and the Caribbean	Punta Alcalde power station	Unit 2	Termoeléctrica Punta Alcalde		370	cancelled			subcritical	subbituminous					Enel Generación Chile [100%]	Enel Generación Chile [100.0%]	-28.5703	-71.3114	approximate	Punta Alcalde			III Region	https://www.gem.wiki/Punta_Alcalde_power_station	L100000100189	G100000108240	IT0003128367	1	740	740	-99	40	80	120
coal	Italy	Europe	Southern Europe	Rossano Calabro power station	Unit 5			800	cancelled	2012		supercritical	bituminous					Enel [100%]	Enel [100.0%]	39.6227	16.6067	approximate	Rossano			Cosenza	https://www.gem.wiki/Rossano_Calabro_power_station	L100000102845	G100000108641	IT0003128367	1	800	800	12	2052	2092	2132
coal	Italy	Europe	Southern Europe	Santa Barbara power station	Unit 1		Santa Barbara Enel power station	125	retired	1957	2004	subcritical	unknown					Enel [100%]	Enel [100.0%]	43.565	11.4777	exact	Cavriglia			Arezzo	https://www.gem.wiki/Santa_Barbara_power_station	L100000400436	G100000114666	IT0003128367	1	642		67	1997	2037	2077
coal	Italy	Europe	Southern Europe	Santa Barbara power station	Unit 2		Santa Barbara Enel power station	125	retired	1958	2004	subcritical	unknown					Enel [100%]	Enel [100.0%]	43.565	11.4777	exact	Cavriglia			Arezzo	https://www.gem.wiki/Santa_Barbara_power_station	L100000400436	G100000114667	IT0003128367	1	642	642	66	1998	2038	2078
coal	Italy	Europe	Southern Europe	Sulcis power station	Unit 3			240	operating	1986	2027	subcritical	bituminous					Enel [100%]	Enel [100.0%]	39.1953	8.39992	exact	Portoscuso (Portu de Scusi)		Carbonia-Iglesias (Carbònia-Igrèsias)	Sardegna	https://www.gem.wiki/Sulcis_power_station	L100000102844	G100000109678	IT0003128367	1	590		38	2026	2066	2106
coal	Italy	Europe	Southern Europe	Sulcis power station	Unit 2			350	operating	2005	2027	subcritical	bituminous					Enel [100%]	Enel [100.0%]	39.1953	8.39992	exact	Portoscuso (Portu de Scusi)		Carbonia-Iglesias (Carbònia-Igrèsias)	Sardegna	https://www.gem.wiki/Sulcis_power_station	L100000102844	G100000109677	IT0003128367	1	590	590	19	2045	2085	2125
coal	Colombia	Americas	Latin America and the Caribbean	Termozipa power station	Unit 2	Central Térmica Termozipa	Martín del Corral power station	38	operating	1964	2027	subcritical	bituminous					Enel Colombia [100%]	Enel Américas SA [57.3%]; Grupo Energía Bogotá SA ESP [42.5%]	4.97082	-73.9473	exact	Tocancipá		Tocancipá	Cundinamarca	https://www.gem.wiki/Termozipa_power_station	L100000101769	G100000110023	IT0003128367	0.573	236		60	2004	2044	2084
coal	Colombia	Americas	Latin America and the Caribbean	Termozipa power station	Unit 3	Central Térmica Termozipa	Martín del Corral power station	66	operating	1976	2027	subcritical	bituminous					Enel Colombia [100%]	Enel Américas SA [57.3%]; Grupo Energía Bogotá SA ESP [42.5%]	4.97082	-73.9473	exact	Tocancipá		Tocancipá	Cundinamarca	https://www.gem.wiki/Termozipa_power_station	L100000101769	G100000110024	IT0003128367	0.573	236		48	2016	2056	2096
coal	Colombia	Americas	Latin America and the Caribbean	Termozipa power station	Unit 4	Central Térmica Termozipa	Martín del Corral power station	66	operating	1981	2027	subcritical	bituminous					Enel Colombia [100%]	Enel Américas SA [57.3%]; Grupo Energía Bogotá SA ESP [42.5%]	4.97082	-73.9473	exact	Tocancipá		Tocancipá	Cundinamarca	https://www.gem.wiki/Termozipa_power_station	L100000101769	G100000110025	IT0003128367	0.573	236		43	2021	2061	2101
coal	Colombia	Americas	Latin America and the Caribbean	Termozipa power station	Unit 5	Central Térmica Termozipa	Martín del Corral power station	66	operating	1992	2027	subcritical	bituminous					Enel Colombia [100%]	Enel Américas SA [57.3%]; Grupo Energía Bogotá SA ESP [42.5%]	4.97082	-73.9473	exact	Tocancipá		Tocancipá	Cundinamarca	https://www.gem.wiki/Termozipa_power_station	L100000101769	G100000110026	IT0003128367	0.573	236	236	32	2032	2072	2112
coal	Italy	Europe	Southern Europe	Torrevaldaliga Nord power station	Unit 1			660	operating	2009	2025	ultra-supercritical	bituminous					Enel [100%]	Enel [100.0%]	42.1269	11.7583	exact	Civitavecchia			Rome	https://www.gem.wiki/Torrevaldaliga_Nord_power_station	L100000102854	G100000110298	IT0003128367	1	2780		15	2049	2089	2129
coal	Italy	Europe	Southern Europe	Torrevaldaliga Nord power station	Unit 2			660	operating	2010	2025	ultra-supercritical	bituminous					Enel [100%]	Enel [100.0%]	42.1269	11.7583	exact	Civitavecchia			Rome	https://www.gem.wiki/Torrevaldaliga_Nord_power_station	L100000102854	G100000110299	IT0003128367	1	2780		14	2050	2090	2130
coal	Italy	Europe	Southern Europe	Torrevaldaliga Nord power station	Unit 3			660	operating	2010	2025	ultra-supercritical	bituminous					Enel [100%]	Enel [100.0%]	42.1269	11.7583	exact	Civitavecchia			Rome	https://www.gem.wiki/Torrevaldaliga_Nord_power_station	L100000102854	G100000110300	IT0003128367	1	2780	2780	14	2050	2090	2130
coal	Slovakia	Europe	Eastern Europe	Vojany I power station	Unit 1		Vojany EVO	110	retired	1965	2010	unknown	anthracite					Slovenské Elektrárne [100%]	Ministry of Economy (Slovakia) [34.0%]; Enel SpA [33.0%]; EP Slovakia BV [33.0%]	48.5525	21.9726	exact	Ižkovce		Michalovce	Košice	https://www.gem.wiki/Vojany_I_power_station	L100000103410	G100000110646	IT0003128367	0.33	660		59	2005	2045	2085
coal	Slovakia	Europe	Eastern Europe	Vojany I power station	Unit 2		Vojany EVO	110	retired	1965	2010	unknown	anthracite					Slovenské Elektrárne [100%]	Ministry of Economy (Slovakia) [34.0%]; Enel SpA [33.0%]; EP Slovakia BV [33.0%]	48.5525	21.9726	exact	Ižkovce		Michalovce	Košice	https://www.gem.wiki/Vojany_I_power_station	L100000103410	G100000110647	IT0003128367	0.33	660		59	2005	2045	2085
coal	Slovakia	Europe	Eastern Europe	Vojany I power station	Unit 3		Vojany EVO	110	retired	1966	2008	unknown	anthracite					Slovenské Elektrárne [100%]	Ministry of Economy (Slovakia) [34.0%]; Enel SpA [33.0%]; EP Slovakia BV [33.0%]	48.5525	21.9726	exact	Ižkovce		Michalovce	Košice	https://www.gem.wiki/Vojany_I_power_station	L100000103410	G100000110648	IT0003128367	0.33	660		58	2006	2046	2086
coal	Slovakia	Europe	Eastern Europe	Vojany I power station	Unit 4		Vojany EVO	110	retired	1966	2008	unknown	anthracite					Slovenské Elektrárne [100%]	Ministry of Economy (Slovakia) [34.0%]; Enel SpA [33.0%]; EP Slovakia BV [33.0%]	48.5525	21.9726	exact	Ižkovce		Michalovce	Košice	https://www.gem.wiki/Vojany_I_power_station	L100000103410	G100000110649	IT0003128367	0.33	660		58	2006	2046	2086
coal	Slovakia	Europe	Eastern Europe	Vojany I power station	Unit 5		Vojany EVO	110	operating	1966	2024	unknown	anthracite					Slovenské Elektrárne [100%]	Ministry of Economy (Slovakia) [34.0%]; Enel SpA [33.0%]; EP Slovakia BV [33.0%]	48.5525	21.9726	exact	Ižkovce		Michalovce	Košice	https://www.gem.wiki/Vojany_I_power_station	L100000103410	G100000110650	IT0003128367	0.33	660		58	2006	2046	2086
coal	Slovakia	Europe	Eastern Europe	Vojany I power station	Unit 6		Vojany EVO	110	operating	1966	2024	unknown	anthracite					Slovenské Elektrárne [100%]	Ministry of Economy (Slovakia) [34.0%]; Enel SpA [33.0%]; EP Slovakia BV [33.0%]	48.5525	21.9726	exact	Ižkovce		Michalovce	Košice	https://www.gem.wiki/Vojany_I_power_station	L100000103410	G100000110651	IT0003128367	0.33	660	660	58	2006	2046	2086
geothermal	Italy	Europe	Southern Europe	Bagnore geothermal power plant	4	Centrale geotermica Bagnore		40	operating	2014		dry steam						Enel Green Power [100%]		42.8416	11.5588	exact		Grosseto		Tuscany	https://gem.wiki/Bagnore_geothermal_power_plant	L100000700007	G100000700012	IT0003128367	1	40	40	10	2054	2094	2134
geothermal	Chile	Americas	Latin America and the Caribbean	Cerro Pabellón geothermal power plant	1	Central geotérmica Cerro Pabellón		24	operating	2017		binary cycle						Empresa Nacional del Petróleo [50%]; Enel Chile [50%]		-21.8576	-68.1515	exact	Ollagüe	Provincia de El Loa		Antofagasta Region	https://gem.wiki/Cerro_Pabellón_geothermal_power_plant	L100000700026	G100000700326	IT0003128367	0.5	81		7	2057	2097	2137
geothermal	Chile	Americas	Latin America and the Caribbean	Cerro Pabellón geothermal power plant	2	Central geotérmica Cerro Pabellón		24	operating	2017		binary cycle						Empresa Nacional del Petróleo [50%]; Enel Chile [50%]		-21.8576	-68.1515	exact	Ollagüe	Provincia de El Loa		Antofagasta Region	https://gem.wiki/Cerro_Pabellón_geothermal_power_plant	L100000700026	G100000700327	IT0003128367	0.5	81		7	2057	2097	2137
geothermal	Chile	Americas	Latin America and the Caribbean	Cerro Pabellón geothermal power plant	3	Central geotérmica Cerro Pabellón		33	operating	2021		binary cycle						Empresa Nacional del Petróleo [50%]; Enel Chile [50%]		-21.8576	-68.1515	exact	Ollagüe	Provincia de El Loa		Antofagasta Region	https://gem.wiki/Cerro_Pabellón_geothermal_power_plant	L100000700026	G100000700037	IT0003128367	0.5	81	81	3	2061	2101	2141
geothermal	Italy	Europe	Southern Europe	Farinello geothermal power plant	--	Centrale geotermica Farinello		60	operating	1995		dry steam						Enel Green Power [100%]		43.2388	10.9047	exact		Pisa		Tuscany	https://gem.wiki/Farinello_geothermal_power_plant	L100000700051	G100000700079	IT0003128367	1	60	60	29	2035	2075	2115
geothermal	Italy	Europe	Southern Europe	Nuova Radicondoli geothermal power plant	--	Centrale geotermica Nuova Radicondoli		40	operating	2002		dry steam						Enel Green Power [100%]		43.1935	11.0446	exact		Siena		Tuscany	https://gem.wiki/Nuova_Radicondoli_geothermal_power_plant	L100000700126	G100000700206	IT0003128367	1	40		22	2042	2082	2122
geothermal	Italy	Europe	Southern Europe	Nuova San Martino geothermal power plant	--	Centrale geotermica Nuova San Martino		40	operating	2005		dry steam						Enel Green Power [100%]		43.1452	10.8325	exact		Grosseto		Tuscany	https://gem.wiki/Nuova_San_Martino_geothermal_power_plant	L100000700127	G100000700207	IT0003128367	1	40	40	19	2045	2085	2125
geothermal	Italy	Europe	Southern Europe	Nuova Serrazzano geothermal power plant	--	Centrale geotermica Nuova Serrazzano		60	operating	2002		dry steam						Enel Green Power [100%]		43.204	10.8003	exact		Pisa		Tuscany	https://gem.wiki/Nuova_Serrazzano_geothermal_power_plant	L100000700128	G100000700208	IT0003128367	1	60	60	22	2042	2082	2122
geothermal	United States	Americas	Northern America	Surprise Valley geothermal plant	--			52	cancelled			unknown type						Enel Green Power [100%]		39.501	-116.042	approximate		Modoc County		Nevada	https://gem.wiki/Surprise_Valley_geothermal_plant	L100000700166	G100000700272	IT0003128367	1	52	52	-99	40	80	120
geothermal	Italy	Europe	Southern Europe	Travale geothermal power plant	4	Centrale geotermica Travale		40	operating	2002		dry steam						Enel Green Power [100%]		43.1708	11.039	exact		Grosseto		Tuscany	https://gem.wiki/Travale_geothermal_power_plant	L100000700180	G100000700299	IT0003128367	1	40	40	22	2042	2082	2122
geothermal	Italy	Europe	Southern Europe	Valle Secolo geothermal power plant	1	Centrale geotermica di Larderello Valle Secolo		60	operating	1991		dry steam						Enel Green Power [100%]		42.2362	10.8674	exact		Grosseto		Tuscany	https://gem.wiki/Valle_Secolo_geothermal_power_plant	L100000700186	G100000700310	IT0003128367	1	120		33	2031	2071	2111
geothermal	Italy	Europe	Southern Europe	Valle Secolo geothermal power plant	2	Centrale geotermica di Larderello Valle Secolo		60	operating	1991		dry steam						Enel Green Power [100%]		42.2362	10.8674	exact		Grosseto		Tuscany	https://gem.wiki/Valle_Secolo_geothermal_power_plant	L100000700186	G100000700311	IT0003128367	1	120	120	33	2031	2071	2111
hydropower	Chile	Americas	Latin America and the Caribbean	Abanico hydroelectric plant (Chile)		Central Hidroeléctrica Abanico		136	operating	1948		run-of-river				TRUE	FALSE	Enel Generación Chile SA		-37.3646	-71.4894	exact				Biobío Region	https://gem.wiki/Abanico_hydroelectric_plant_(Chile)	L600544	G600545	IT0003128367	1	136	136	76	1988	2028	2068
hydropower	Italy	Europe	Southern Europe	Anapo hydroelectric plant			Anapo C.Le	500	operating	1989		pumped storage				TRUE	FALSE	Enel SPA		37.1101	15.1493	exact		Siracusa		Sicily	https://gem.wiki/Anapo_hydroelectric_plant	L602191	G602217	IT0003128367	1	500	500	35	2029	2069	2109
hydropower	Chile	Americas	Latin America and the Caribbean	Antuco hydroelectric plant		Central Hidroeléctrica Antuco		320	operating	1981		conventional storage				TRUE	FALSE	Enel Generación Chile SA		-37.3103	-71.6264	exact				Biobío Region	https://gem.wiki/Antuco_hydroelectric_plant	L600548	G600549	IT0003128367	1	320	320	43	2021	2061	2101
hydropower	Argentina	Americas	Latin America and the Caribbean	Arroyito hydroelectric plant		Central Hidroeléctrica Arroyito		128	operating	1983		conventional storage				TRUE	FALSE	Enel Generación		-39.1067	-68.5857	exact			Departamento Confluencia	Neuquén Province	https://gem.wiki/Arroyito_hydroelectric_plant	L600020	G600020	IT0003128367	1	128	128	41	2023	2063	2103
hydropower	Italy	Europe	Southern Europe	Bargi hydroelectric plant (Italy)			Bargi Psp, Bargi Centrale	281	operating	1975		pumped storage				TRUE	FALSE	Enel SPA		44.1167	11.043	exact		Bologna		Emilia-Romagna	https://gem.wiki/Bargi_hydroelectric_plant_(Italy)	L602193	G602219	IT0003128367	1	281	281	49	2015	2055	2095
hydropower	Colombia	Americas	Latin America and the Caribbean	Betania hydroelectric plant		Central Hidroeléctrica Betania	Betania Huila	540	operating	1987		conventional storage				TRUE	FALSE	Enel Generación		2.7082	-75.4298	exact		Hobo	Norte	Huila	https://gem.wiki/Betania_hydroelectric_plant	L601398	G601416	IT0003128367	1	540	540	37	2027	2067	2107
hydropower	Brazil	Americas	Latin America and the Caribbean	Cachoeira Dourada hydroelectric plant		Usina Hidrelétrica Cachoeira Dourada		658	operating	1959		run-of-river				TRUE	FALSE	Enel Green Power		-18.5043	-49.4902	exact			Região Geográfica Intermediária de Uberlândia	Minas Gerais	https://gem.wiki/Cachoeira_Dourada_hydroelectric_plant	L600226	G600226	IT0003128367	1	658	658	65	1999	2039	2079
hydropower	Italy	Europe	Southern Europe	Capriati hydroelectric plant			Capriati (Lete Sava)	113	operating	1966		pumped storage				TRUE	FALSE	Enel SPA		41.4763	14.1282	exact		Caserta		Campania	https://gem.wiki/Capriati_hydroelectric_plant	L602197	G602223	IT0003128367	1	113	113	58	2006	2046	2086
hydropower	Italy	Europe	Southern Europe	Castrocucco hydroelectric plant			Masseria Nicodemo	83	operating	1973		conventional storage				TRUE	FALSE	Enel SPA		39.9896	15.8081	exact		Cosenza		Calabria	https://gem.wiki/Castrocucco_hydroelectric_plant	L602200	G602226	IT0003128367	1	83	83	51	2013	2053	2093
hydropower	Peru	Americas	Latin America and the Caribbean	Chimay hydroelectric plant		Central Hidroeléctrica Chimay	Junín	152	operating	2000		conventional storage				TRUE	FALSE	Enel Generación Perú		-11.3248	-75.3006	exact				Junín	https://gem.wiki/Chimay_hydroelectric_plant	L603090	G603125	IT0003128367	1	152	152	24	2040	2080	2120
hydropower	Argentina	Americas	Latin America and the Caribbean	Chocón hydroelectric plant		Central Hidroeléctrica El Chocón		1200	operating	1972		conventional storage				TRUE	FALSE	Enel Generación		-39.2653	-68.7556	exact			Departamento Confluencia	Neuquén Province	https://gem.wiki/Chocón_hydroelectric_plant	L600025	G600025	IT0003128367	1	1200	1200	52	2012	2052	2092
hydropower	Slovakia	Europe	Eastern Europe	Čierny Váh hydroelectric plant				734	operating	1982		pumped storage				TRUE	FALSE	Slovak Republic [34%]; EP Slovakia [33%]; Enel SPA [33%]		49.0088	19.9121	exact		District of Liptovský Mikuláš		Region of Žilina	https://gem.wiki/Čierny_Váh_hydroelectric_plant	L603306	G603341	IT0003128367	0.33	734	734	42	2022	2062	2102
hydropower	Chile	Americas	Latin America and the Caribbean	Cipreses hydroelectric plant		Central Hidroeléctrica Cipreses		106	operating			conventional storage				TRUE	FALSE	Enel Generación Chile SA		-35.7872	-70.8084	exact				Maule Region	https://gem.wiki/Cipreses_hydroelectric_plant	L600551	G600552	IT0003128367	1	106	106	-99	40	80	120
hydropower	Colombia	Americas	Latin America and the Caribbean	Dario Valencia hydroelectric plant		Central Hidroeléctrica Dario Valencia	Dario Valencia Samper	150	operating	1973		conventional storage				TRUE	FALSE	Enel Generación		4.602	-74.4315	exact				Cundinamarca	https://gem.wiki/Dario_Valencia_hydroelectric_plant	L601405	G601423	IT0003128367	1	150	150	51	2013	2053	2093
hydropower	Italy	Europe	Southern Europe	Edolo hydroelectric plant				950	operating			pumped storage				TRUE	FALSE	Enel SPA		46.1721	10.3442	exact		Brescia		Lombardy	https://gem.wiki/Edolo_hydroelectric_plant	L602202	G602228	IT0003128367	1	950	950	-99	40	80	120
hydropower	Colombia	Americas	Latin America and the Caribbean	El Paraiso hydroelectric plant		Central Hidroeléctrica El Paraiso		276	operating	1986		conventional storage				TRUE	FALSE	Enel Generación		4.5717	-74.4015	approximate			Mesitas del Colegio	Cundimarca	https://gem.wiki/El_Paraiso_hydroelectric_plant	L601406	G601424	IT0003128367	1	276	276	38	2026	2066	2106
hydropower	Colombia	Americas	Latin America and the Caribbean	El Quimbo hydroelectric plant		Central Hidroeléctrica El Quimbo		396	operating	2015		conventional storage				TRUE	FALSE	Enel Generación		2.4507	-75.565	exact			Occidente	Huila	https://gem.wiki/El_Quimbo_hydroelectric_plant	L601407	G601425	IT0003128367	1	396	396	9	2055	2095	2135
hydropower	Chile	Americas	Latin America and the Caribbean	El Toro hydroelectric plant		Central Hidroeléctrica El Toro		450	operating	1973		conventional storage				TRUE	FALSE	Enel Generación Chile SA		-37.2934	-71.4924	exact				Biobío Region	https://gem.wiki/El_Toro_hydroelectric_plant	L600554	G600555	IT0003128367	1	450	450	51	2013	2053	2093
hydropower	Italy	Europe	Southern Europe	Entracque Chro hydroelectric plant			L Einaudi (Chiotas)	1064	operating			pumped storage				TRUE	FALSE	Enel SPA		44.2299	7.3908	exact		Cuneo		Piedmont	https://gem.wiki/Entracque_Chro_hydroelectric_plant	L602203	G602229	IT0003128367	1	1064	1064	-99	40	80	120
hydropower	Italy	Europe	Southern Europe	Entracque Rovina hydroelectric plant			L Einaudi (Rovina)	125	operating	1982		pumped storage				TRUE	FALSE	Enel SPA		44.2299	7.3908	exact		Cuneo		Piedmont	https://gem.wiki/Entracque_Rovina_hydroelectric_plant	L602204	G602230	IT0003128367	1	125	125	42	2022	2062	2102
hydropower	Italy	Europe	Southern Europe	Fadalto hydroelectric plant				220	operating			pumped storage				TRUE	FALSE	Enel SPA		46.0692	12.3299	exact		Treviso		Veneto	https://gem.wiki/Fadalto_hydroelectric_plant	L602205	G602231	IT0003128367	1	220	220	-99	40	80	120
hydropower	Panama	Americas	Latin America and the Caribbean	Fortuna hydroelectric plant		Central Hidroeléctrica Fortuna	Edwin Fabrega	300	operating	1984		conventional storage				TRUE	FALSE	Enel Green Power		8.679	-82.2626	exact	Hornito	Distrito Gualaca		Chiriquí	https://gem.wiki/Fortuna_hydroelectric_plant	L603071	G603105	IT0003128367	1	300	300	40	2024	2064	2104
hydropower	Slovakia	Europe	Eastern Europe	Gabčíkovo hydroelectric plant				720	operating	1992		run-of-river				TRUE	FALSE	Slovak Republic [34%]; EP Slovakia [33%]; Enel SPA [33%]		47.8801	17.5388	exact		District of Dunajská Streda		Region of Trnava	https://gem.wiki/Gabčíkovo_hydroelectric_plant	L603307	G603342	IT0003128367	0.33	720	720	32	2032	2072	2112
hydropower	Italy	Europe	Southern Europe	Galleto hydroelectric plant			Galleto M San Angelo	295	operating	1929		run-of-river				TRUE	FALSE	Enel SPA		42.5527	12.699	exact	Terni	Terni		Umbria	https://gem.wiki/Galleto_hydroelectric_plant	L602206	G602232	IT0003128367	1	295	295	95	1969	2009	2049
hydropower	Italy	Europe	Southern Europe	Gargnano hydroelectric plant			Villa Gargnano	137	operating			pumped storage				TRUE	FALSE	Enel SPA		45.7039	10.6863	exact		Brescia		Lombardy	https://gem.wiki/Gargnano_hydroelectric_plant	L602207	G602233	IT0003128367	1	137	137	-99	40	80	120
hydropower	Colombia	Americas	Latin America and the Caribbean	Guaca hydroelectric plant		Central Hidroeléctrica Guaca		324	operating	1985		run-of-river				TRUE	FALSE	Grupo Energía Bogotá [51.51%]; Enel Generación [48.48%]		4.5899	-74.4601	exact			Tequendama		https://gem.wiki/Guaca_hydroelectric_plant	L601410	G601428	IT0003128367	0.4848	324	324	39	2025	2065	2105
hydropower	Italy	Europe	Southern Europe	Guadalami hydroelectric plant			Guadalami C.le	80	operating	1961		pumped storage				TRUE	FALSE	Enel SPA		37.9555	13.2793	exact		Palermo		Sicily	https://gem.wiki/Guadalami_hydroelectric_plant	L602209	G602235	IT0003128367	1	80	80	63	2001	2041	2081
hydropower	Colombia	Americas	Latin America and the Caribbean	Guavio hydroelectric plant		Central Hidroeléctrica Guavio		1250	operating	1990		conventional storage				TRUE	FALSE	Enel Generación		4.7247	-73.4831	exact			Ubalá	Cundimarca	https://gem.wiki/Guavio_hydroelectric_plant	L601414	G601432	IT0003128367	1	1250	1250	34	2030	2070	2110
hydropower	Peru	Americas	Latin America and the Caribbean	Huinco hydroelectric plant		Central Hidroeléctrica Huinco		258	operating	1964		conventional storage				TRUE	FALSE	Enel Generación Perú		-11.7645	-76.6153	exact	San Antonio			Lima	https://gem.wiki/Huinco_hydroelectric_plant	L603097	G603132	IT0003128367	1	258	258	60	2004	2044	2084
hydropower	Italy	Europe	Southern Europe	Isola Serafiini hydroelectric plant				82	operating	1962		run-of-river				TRUE	FALSE	Enel SPA		45.0936	9.9046	exact		Piacenza		Emilia-Romagna	https://gem.wiki/Isola_Serafiini_hydroelectric_plant	L602210	G602236	IT0003128367	1	82	82	62	2002	2042	2082
hydropower	Italy	Europe	Southern Europe	Lanzada hydroelectric plant				350	operating			run-of-river				TRUE	FALSE	Enel SPA		46.2685	9.876	exact		Sondrio		Lombardy	https://gem.wiki/Lanzada_hydroelectric_plant	L602212	G602238	IT0003128367	1	350	350	-99	40	80	120
hydropower	Slovakia	Europe	Eastern Europe	Liptovská Mara hydroelectric plant				198	operating	1975		conventional storage				TRUE	FALSE	Slovak Republic [34%]; EP Slovakia [33%]; Enel SPA [33%]		49.0967	19.4841	exact		District of Liptovský Mikuláš		Region of Žilina	https://gem.wiki/Liptovská_Mara_hydroelectric_plant	L603309	G603344	IT0003128367	0.33	198	198	49	2015	2055	2095
hydropower	Chile	Americas	Latin America and the Caribbean	Los Cóndores hydroelectric plant		Central Hidroeléctrica Los Cóndores		153	construction	2023		run-of-river				TRUE	FALSE	Enel Generación Chile SA		-35.9169	-70.6293	exact				Maule Region	https://gem.wiki/Los_Cóndores_hydroelectric_plant	L600563	G600564	IT0003128367	1	153	153	1	2063	2103	2143
hydropower	Peru	Americas	Latin America and the Caribbean	Matucana hydroelectric plant		Central Hidroeléctrica Matucana	San Jerónimo de Surco	120	operating	1972		run-of-river				TRUE	FALSE	Enel Generación Perú		-11.8865	-76.4556	exact	Surco			Lima	https://gem.wiki/Matucana_hydroelectric_plant	L603104	G603139	IT0003128367	1	120	120	52	2012	2052	2092
hydropower	Italy	Europe	Southern Europe	Montorio hydroelectric plant				110	operating	1954		run-of-river				TRUE	FALSE	Enel SPA		42.5858	13.7089	exact		Teramo		Abruzzo	https://gem.wiki/Montorio_hydroelectric_plant	L602214	G602240	IT0003128367	1	110	110	70	1994	2034	2074
hydropower	Italy	Europe	Southern Europe	Mucone I hydroelectric plant			Mucone 1S; Mucone I Salto	169	operating			run-of-river				TRUE	FALSE	Enel SPA		39.4716	16.4056	exact		Cosenza		Calabria	https://gem.wiki/Mucone_I_hydroelectric_plant	L602215	G602241	IT0003128367	1	169	169	-99	40	80	120
hydropower	Guatemala	Americas	Latin America and the Caribbean	Palo Viejo hydroelectric plant		Central Hidroeléctrica Palo Viejo		87	operating	2012		run-of-river				TRUE	FALSE	Enel Green Power		15.5047	-90.886	exact		Chajul		Quiché	https://gem.wiki/Palo_Viejo_hydroelectric_plant	L601771	G601790	IT0003128367	1	87	87	12	2052	2092	2132
hydropower	Chile	Americas	Latin America and the Caribbean	Pangue hydroelectric plant		Central Hidroeléctrica Pangue		467	operating	1996		conventional storage				TRUE	FALSE	Enel Generación Chile SA		-37.9099	-71.6087	exact				Biobío Region	https://gem.wiki/Pangue_hydroelectric_plant	L600568	G600569	IT0003128367	1	467	467	28	2036	2076	2116
hydropower	Chile	Americas	Latin America and the Caribbean	Pehuenche hydroelectric plant		Central Hidroeléctrica Pehuenche		570	operating	1991		conventional storage				TRUE	FALSE	Enel Generación Chile SA		-35.7338	-71.1555	exact				Maule Region	https://gem.wiki/Pehuenche_hydroelectric_plant	L600569	G600570	IT0003128367	1	570	570	33	2031	2071	2111
hydropower	Italy	Europe	Southern Europe	Presenzano hydroelectric plant			Domenico Cimarosa	985	operating	1991		pumped storage				TRUE	FALSE	Enel SPA		41.3854	14.0929	exact		Caserta		Campania	https://gem.wiki/Presenzano_hydroelectric_plant	L602220	G602246	IT0003128367	1	985	985	33	2031	2071	2111
hydropower	Italy	Europe	Southern Europe	Provvidenza hydroelectric plant				139	operating	1962		pumped storage				TRUE	FALSE	Enel SPA		42.5113	13.4104	exact	L'Aquila	L'Aquila		Abruzzo	https://gem.wiki/Provvidenza_hydroelectric_plant	L602221	G602247	IT0003128367	1	139	139	62	2002	2042	2082
hydropower	Chile	Americas	Latin America and the Caribbean	Ralco hydroelectric plant		Central Hidroeléctrica Ralco		690	operating	2004		conventional storage				TRUE	FALSE	Enel Generación Chile SA		-37.9969	-71.5199	exact				Biobío Region	https://gem.wiki/Ralco_hydroelectric_plant	L600572	G600573	IT0003128367	1	690	690	20	2044	2084	2124
hydropower	Chile	Americas	Latin America and the Caribbean	Rapel hydroelectric plant		Central Hidroeléctrica Rapel		377	operating	1968		conventional storage				TRUE	FALSE	Enel Generación Chile SA		-34.0409	-71.5902	exact				Libertador General Bernardo O'Higgins Region	https://gem.wiki/Rapel_hydroelectric_plant	L600573	G600574	IT0003128367	1	377	377	56	2008	2048	2088
hydropower	Italy	Europe	Southern Europe	Roncovalgrande hydroelectric plant				1000	operating	1971		pumped storage				TRUE	FALSE	Enel SPA		46.0694	8.7324	exact	Maccagno con Pino e Veddasca	Varese		Lombardy	https://gem.wiki/Roncovalgrande_hydroelectric_plant	L602223	G602249	IT0003128367	1	1000	1000	53	2011	2051	2091
hydropower	Italy	Europe	Southern Europe	San Fiorano hydroelectric plant			S. Fiorano	268	operating	1973		pumped storage				TRUE	FALSE	Enel SPA		46.0442	10.3521	exact		Brescia		Lombardy	https://gem.wiki/San_Fiorano_hydroelectric_plant	L602225	G602251	IT0003128367	1	268	268	51	2013	2053	2093
hydropower	Italy	Europe	Southern Europe	San Giacomo Sul Vomano hydroelectric plant			S. Giacomo Al Vomano	490	operating			pumped storage				TRUE	FALSE	Enel SPA		42.5607	13.5641	exact		Teramo		Abruzzo	https://gem.wiki/San_Giacomo_Sul_Vomano_hydroelectric_plant	L602227	G602253	IT0003128367	1	490	490	-99	40	80	120
hydropower	Chile	Americas	Latin America and the Caribbean	Sauzal hydroelectric plant		Central Hidroeléctrica Sauzal		80	operating	1948		run-of-river				TRUE	FALSE	Enel Generación Chile SA		-34.2526	-70.6313	exact		Provincia de Cachapoal		O'Higgins Region	https://gem.wiki/Sauzal_hydroelectric_plant	L600578	G600579	IT0003128367	1	80	80	76	1988	2028	2068
hydropower	Italy	Europe	Southern Europe	Sondrio hydroelectric plant				144	operating	1960		unknown				TRUE	FALSE	Enel SPA		46.173	9.8876	exact		Sondrio		Lombardy	https://gem.wiki/Sondrio_hydroelectric_plant	L602231	G602257	IT0003128367	1	144	144	64	2000	2040	2080
hydropower	Italy	Europe	Southern Europe	Soverzene hydroelectric plant			Achille Gaggia	214	operating	1951		conventional storage				TRUE	FALSE	Enel SPA		46.2009	12.3023	exact		Belluno		Veneto	https://gem.wiki/Soverzene_hydroelectric_plant	L602232	G602258	IT0003128367	1	214	214	73	1991	2031	2071
hydropower	Italy	Europe	Southern Europe	Taloro hydroelectric plant			Taloro 1	240	operating	1978		pumped storage				TRUE	FALSE	Enel SPA		40.1278	9.1409	exact		Nuoro		Sardinia	https://gem.wiki/Taloro_hydroelectric_plant	L602235	G602261	IT0003128367	1	240	240	46	2018	2058	2098
hydropower	Italy	Europe	Southern Europe	Venaus hydroelectric plant			Venaus Mont-Cenis	230	operating	1967		conventional storage				TRUE	FALSE	Enel SPA		45.1617	7.0091	exact		Torino		Piedmont	https://gem.wiki/Venaus_hydroelectric_plant	L602239	G602265	IT0003128367	1	230	230	57	2007	2047	2087
hydropower	Peru	Americas	Latin America and the Caribbean	Veracruz hydroelectric plant		Central Hidroeléctrica Veracruz	Veracruz Marañon	635	shelved			conventional storage				TRUE	FALSE	Enel Generación Perú		-6.2501	-78.8333	approximate		Cutevero	Cutevero	Cajamarca	https://gem.wiki/Veracruz_hydroelectric_plant	L603131	G603166	IT0003128367	1	635	635	-99	40	80	120
hydropower	Brazil	Americas	Latin America and the Caribbean	Volta Grande hydroelectric plant		Usina Hidrelétrica Volta Grande		380	operating	1974		run-of-river				TRUE	FALSE	Enel Green Power		-20.0333	-48.2218	exact			Região Geográfica Intermediária de Ribeirão Preto	São Paulo	https://gem.wiki/Volta_Grande_hydroelectric_plant	L600361	G600362	IT0003128367	1	380	380	50	2014	2054	2094
nuclear	Italy	Europe	Southern Europe	Montalto di Castro nuclear power plant	2		Alto Lazio	1009	cancelled			boiling water reactor						Enel - Societa Per Azioni		42.3594	11.5301	exact		Viterbo		Lazio	https://gem.wiki/Montalto_di_Castro_nuclear_power_plant	L500421	G501207	IT0003128367	1	1009	1009	-99	40	80	120
oil/gas	Italy	Europe	Southern Europe	Andrea Palladio power station	1	Andrea Palladio centrale termoelettrica a carbone	Fusina power station	560	shelved			GT	NG					Enel SpA [100.0%]	Enel SpA [100.0%]	45.4314	12.2468	exact	Fusina		Venezia	Veneto	https://www.gem.wiki/Andrea_Palladio_power_station	L100000102860	G100000401333	IT0003128367	1	1816		-99	40	80	120
oil/gas	Italy	Europe	Southern Europe	Andrea Palladio power station	2	Andrea Palladio centrale termoelettrica a carbone	Fusina power station	280	shelved			ST	WSTH-NG					Enel SpA [100.0%]	Enel SpA [100.0%]	45.4314	12.2468	exact	Fusina		Venezia	Veneto	https://www.gem.wiki/Andrea_Palladio_power_station	L100000102860	G100000409839	IT0003128367	1	1816	1816	-99	40	80	120
oil/gas	Italy	Europe	Southern Europe	Assemini power station	GT1			90	operating	1992		GT	NG/D/HFO					Enel SpA [100.0%]	Enel SpA [100.0%]	39.2278	8.99654	exact	Assemini			Sardinia	https://www.gem.wiki/Assemini_power_station	L100000408812	G100000412826	IT0003128367	1	180		32	2032	2072	2112
oil/gas	Italy	Europe	Southern Europe	Assemini power station	GT2			90	operating	1992		GT	NG/D/HFO					Enel SpA [100.0%]	Enel SpA [100.0%]	39.2278	8.99654	exact	Assemini			Sardinia	https://www.gem.wiki/Assemini_power_station	L100000408812	G100000412825	IT0003128367	1	180	180	32	2032	2072	2112
oil/gas	Chile	Americas	Latin America and the Caribbean	Atacama power station	CC1	Central Térmica Atacama		358	operating	1999		CC	NG/D					Enel Generación Chile SA [100%]	Enel Generación Chile SA [100.0%]	-23.0898	-70.4168	exact	Mejillones			Antofagasta	https://gem.wiki/Atacama_power_station	L100000406549	G100000406737	IT0003128367	1	716		25	2039	2079	2119
oil/gas	Chile	Americas	Latin America and the Caribbean	Atacama power station	CC2	Central Térmica Atacama		358	operating	2000		CC	NG/D					Enel Generación Chile SA [100%]	Enel Generación Chile SA [100.0%]	-23.0898	-70.4168	exact	Mejillones			Antofagasta	https://gem.wiki/Atacama_power_station	L100000406549	G100000406736	IT0003128367	1	716	716	24	2040	2080	2120
oil/gas	Italy	Europe	Southern Europe	Brindisi Sud power station	CC1		Federico II	840	shelved			CC	NG					Enel SpA [100.0%]	Enel SpA [100.0%]	40.5636	18.0322	exact	Località Produttiva		Brindisi	Apulia	https://www.gem.wiki/Brindisi_Sud_power_station	L100000102842	G100000401334	IT0003128367	1	4320		-99	40	80	120
oil/gas	Italy	Europe	Southern Europe	Brindisi Sud power station	CC2		Federico II	840	shelved			CC	NG					Enel SpA [100.0%]	Enel SpA [100.0%]	40.5636	18.0322	exact	Località Produttiva		Brindisi	Apulia	https://www.gem.wiki/Brindisi_Sud_power_station	L100000102842	G100000401335	IT0003128367	1	4320	4320	-99	40	80	120
oil/gas	Colombia	Americas	Latin America and the Caribbean	Cartagena power station	1	Central Termoeléctrica Cartagena	Termocartagena (Tecsa)	66	operating	1973		ST	NG/FO					Enel Colombia SA ESP [100%]	Enel Américas SA [57.3%]; Grupo Energía Bogotá SA ESP [42.5%]	10.3555	-75.5109	exact	Cartagena			Bolívar	https://gem.wiki/Cartagena_power_station	L100000406567	G100000406714	IT0003128367	0.573	203		51	2013	2053	2093
oil/gas	Colombia	Americas	Latin America and the Caribbean	Cartagena power station	2	Central Termoeléctrica Cartagena	Termocartagena (Tecsa)	66	operating	1976		ST	NG/FO					Enel Colombia SA ESP [100%]	Enel Américas SA [57.3%]; Grupo Energía Bogotá SA ESP [42.5%]	10.3555	-75.5109	exact	Cartagena			Bolívar	https://gem.wiki/Cartagena_power_station	L100000406567	G100000410632	IT0003128367	0.573	203		48	2016	2056	2096
oil/gas	Colombia	Americas	Latin America and the Caribbean	Cartagena power station	3	Central Termoeléctrica Cartagena	Termocartagena (Tecsa)	71	operating	1980		ST	NG/FO					Enel Colombia SA ESP [100%]	Enel Américas SA [57.3%]; Grupo Energía Bogotá SA ESP [42.5%]	10.3555	-75.5109	exact	Cartagena			Bolívar	https://gem.wiki/Cartagena_power_station	L100000406567	G100000410633	IT0003128367	0.573	203	203	44	2020	2060	2100
oil/gas	Italy	Europe	Southern Europe	Codrongianos power station	GT 1&2			34	operating	1969		CC	NG/HFO/OG					Enel SpA [100.0%]	Enel SpA [100.0%]	40.6529	8.71249	exact	Sassari			Sardinia	https://www.gem.wiki/Codrongianos_power_station	L100000408809	G100000412819	IT0003128367	1	100		55	2009	2049	2089
oil/gas	Italy	Europe	Southern Europe	Codrongianos power station	GT 3-6			66	operating	1970		CC	NG/HFO/OG					Enel SpA [100.0%]	Enel SpA [100.0%]	40.6529	8.71249	exact	Sassari			Sardinia	https://www.gem.wiki/Codrongianos_power_station	L100000408809	G100000412818	IT0003128367	1	100	100	54	2010	2050	2090
oil/gas	Italy	Europe	Southern Europe	La Casella power station	1		Edoardo Amaldi	381	operating	2002		CC	NG					Enel SpA [100.0%]	Enel SpA [100.0%]	45.0904	9.4805	exact	Castel San Giovanni			Piacenza	https://www.gem.wiki/La_Casella_power_station	L100000400383	G100000400383	IT0003128367	1	2394		22	2042	2082	2122
oil/gas	Italy	Europe	Southern Europe	La Casella power station	2		Edoardo Amaldi	381	operating	2002		CC	NG					Enel SpA [100.0%]	Enel SpA [100.0%]	45.0904	9.4805	exact	Castel San Giovanni			Piacenza	https://www.gem.wiki/La_Casella_power_station	L100000400383	G100000400384	IT0003128367	1	2394		22	2042	2082	2122
oil/gas	Italy	Europe	Southern Europe	La Casella power station	3		Edoardo Amaldi	381	operating	2003		CC	NG					Enel SpA [100.0%]	Enel SpA [100.0%]	45.0904	9.4805	exact	Castel San Giovanni			Piacenza	https://www.gem.wiki/La_Casella_power_station	L100000400383	G100000400385	IT0003128367	1	2394		21	2043	2083	2123
oil/gas	Italy	Europe	Southern Europe	La Casella power station	4		Edoardo Amaldi	381	operating	2003		CC	NG					Enel SpA [100.0%]	Enel SpA [100.0%]	45.0904	9.4805	exact	Castel San Giovanni			Piacenza	https://www.gem.wiki/La_Casella_power_station	L100000400383	G100000400386	IT0003128367	1	2394		21	2043	2083	2123
oil/gas	Italy	Europe	Southern Europe	La Casella power station	LC6-1		Edoardo Amaldi	590	shelved			GT	NG					Enel SpA [100.0%]	Enel SpA [100.0%]	45.0904	9.4805	exact	Castel San Giovanni			Piacenza	https://www.gem.wiki/La_Casella_power_station	L100000400383	G100000409832	IT0003128367	1	2394		-99	40	80	120
oil/gas	Italy	Europe	Southern Europe	La Casella power station	LC6-2		Edoardo Amaldi	280	shelved			ST	WSTH-NG/BU					Enel SpA [100.0%]	Enel SpA [100.0%]	45.0904	9.4805	exact	Castel San Giovanni			Piacenza	https://www.gem.wiki/La_Casella_power_station	L100000400383	G100000409831	IT0003128367	1	2394	2394	-99	40	80	120
oil/gas	Italy	Europe	Southern Europe	La Spezia power station	SP1		Eugenio Montale	345	operating	2000		CC	NG					Enel SpA [100.0%]	Enel SpA [100.0%]	44.1112	9.87488	exact	La Spezia			Liguria	https://www.gem.wiki/La_Spezia_power_station	L100000102849	G100000400387	IT0003128367	1	2122		24	2040	2080	2120
oil/gas	Italy	Europe	Southern Europe	La Spezia power station	SP2		Eugenio Montale	337	operating	2000		CC	NG					Enel SpA [100.0%]	Enel SpA [100.0%]	44.1112	9.87488	exact	La Spezia			Liguria	https://www.gem.wiki/La_Spezia_power_station	L100000102849	G100000400388	IT0003128367	1	2122		24	2040	2080	2120
oil/gas	Italy	Europe	Southern Europe	La Spezia power station	SP4		Eugenio Montale	840	cancelled			CC	NG					Enel SpA [100.0%]	Enel SpA [100.0%]	44.1112	9.87488	exact	La Spezia			Liguria	https://www.gem.wiki/La_Spezia_power_station	L100000102849	G100000406330	IT0003128367	1	2122	2122	-99	40	80	120
oil/gas	Italy	Europe	Southern Europe	Larino power station	1			124	operating	1992		GT	NG					Enel SpA [100.0%]	Enel SpA [100.0%]	41.8195	14.966	exact	Area Artigianale Monte Arcano			Campobasso	https://www.gem.wiki/Larino_power_station	L100000400389	G100000400389	IT0003128367	1	548		32	2032	2072	2112
oil/gas	Italy	Europe	Southern Europe	Larino power station	2			124	operating	1992		GT	NG					Enel SpA [100.0%]	Enel SpA [100.0%]	41.8195	14.966	exact	Area Artigianale Monte Arcano			Campobasso	https://www.gem.wiki/Larino_power_station	L100000400389	G100000400390	IT0003128367	1	548		32	2032	2072	2112
oil/gas	Italy	Europe	Southern Europe	Larino power station	3			150	shelved			GT	NG					Enel SpA [100.0%]	Enel SpA [100.0%]	41.8195	14.966	exact	Area Artigianale Monte Arcano			Campobasso	https://www.gem.wiki/Larino_power_station	L100000400389	G100000411176	IT0003128367	1	548		-99	40	80	120
oil/gas	Italy	Europe	Southern Europe	Larino power station	4			150	shelved			GT	NG					Enel SpA [100.0%]	Enel SpA [100.0%]	41.8195	14.966	exact	Area Artigianale Monte Arcano			Campobasso	https://www.gem.wiki/Larino_power_station	L100000400389	G100000411175	IT0003128367	1	548	548	-99	40	80	120
oil/gas	Italy	Europe	Southern Europe	Leri Cavour Trino power station	1			870	cancelled			CC	NG					Enel SpA [100.0%]	Enel SpA [100.0%]	45.1943	8.29732	approximate	Trino			Vercelli	https://www.gem.wiki/Leri_Cavour_Trino_power_station	L100000407551	G100000409830	IT0003128367	1	870	870	-99	40	80	120
oil/gas	Peru	Americas	Latin America and the Caribbean	Malacas power station	TG-4	Central Termoeléctrica Malacas		108	operating	1998		GT	NG					Enel Generación Piura SA [100%]	Enel Generación Piura SA [100.0%]	-4.53842	-81.2644	exact	Pariñas		Talara	Piura	https://gem.wiki/Malacas_power_station	L100000406606	G100000406656	IT0003128367	1	361		26	2038	2078	2118
oil/gas	Peru	Americas	Latin America and the Caribbean	Malacas power station	TG-5	Central Termoeléctrica Malacas		200	operating	2013		GT	NG/D					Enel Generación Piura SA [100%]	Enel Generación Piura SA [100.0%]	-4.53842	-81.2644	exact	Pariñas		Talara	Piura	https://gem.wiki/Malacas_power_station	L100000406606	G100000406655	IT0003128367	1	361		11	2053	2093	2133
oil/gas	Peru	Americas	Latin America and the Caribbean	Malacas power station	TG-6	Central Termoeléctrica Malacas		53	operating	2017		GT	NG/D					Enel Generación Piura SA [100%]	Enel Generación Piura SA [100.0%]	-4.53842	-81.2644	exact	Pariñas		Talara	Piura	https://gem.wiki/Malacas_power_station	L100000406606	G100000406657	IT0003128367	1	361	361	7	2057	2097	2137
oil/gas	Italy	Europe	Southern Europe	Montalto Di Castro power station	1			900	operating	1997		CC	LNG/NG/FO					Enel SpA [100.0%]	Enel SpA [100.0%]	42.3572	11.5373	exact	Montalto di Castro			Viterbo	https://www.gem.wiki/Montalto_Di_Castro_power_station	L100000400403	G100000400403	IT0003128367	1	3740		27	2037	2077	2117
oil/gas	Italy	Europe	Southern Europe	Montalto Di Castro power station	2			900	operating	1997		CC	LNG/NG/FO					Enel SpA [100.0%]	Enel SpA [100.0%]	42.3572	11.5373	exact	Montalto di Castro			Viterbo	https://www.gem.wiki/Montalto_Di_Castro_power_station	L100000400403	G100000400404	IT0003128367	1	3740		27	2037	2077	2117
oil/gas	Italy	Europe	Southern Europe	Montalto Di Castro power station	3			900	operating	1998		CC	LNG/NG/FO					Enel SpA [100.0%]	Enel SpA [100.0%]	42.3572	11.5373	exact	Montalto di Castro			Viterbo	https://www.gem.wiki/Montalto_Di_Castro_power_station	L100000400403	G100000400405	IT0003128367	1	3740		26	2038	2078	2118
oil/gas	Italy	Europe	Southern Europe	Montalto Di Castro power station	4			900	operating	1999		CC	LNG/NG/FO					Enel SpA [100.0%]	Enel SpA [100.0%]	42.3572	11.5373	exact	Montalto di Castro			Viterbo	https://www.gem.wiki/Montalto_Di_Castro_power_station	L100000400403	G100000400406	IT0003128367	1	3740		25	2039	2079	2119
oil/gas	Italy	Europe	Southern Europe	Montalto Di Castro power station	5			140	shelved			not found	NG					Enel SpA [100.0%]	Enel SpA [100.0%]	42.3572	11.5373	exact	Montalto di Castro			Viterbo	https://www.gem.wiki/Montalto_Di_Castro_power_station	L100000400403	G100000412806	IT0003128367	1	3740	3740	-99	40	80	120
oil/gas	Italy	Europe	Southern Europe	Pietrafitta power station	1			365	operating	2003		CC	NG					Enel SpA [100.0%]	Enel SpA [100.0%]	42.9954	12.1995	exact	Panicale			Perugia	https://www.gem.wiki/Pietrafitta_power_station	L100000104723	G100000400415	IT0003128367	1	433	433	21	2043	2083	2123
oil/gas	Italy	Europe	Southern Europe	Porto Corsini power station	3		Teodora	350	operating	2002		CC	NG					Enel Produzione SpA [100.0%]	Enel SpA [100.0%]	44.4836	12.2652	exact	Porto Corsini			Ravenna	https://www.gem.wiki/Porto_Corsini_power_station	L100000400418	G100000400418	IT0003128367	1	718		22	2042	2082	2122
oil/gas	Italy	Europe	Southern Europe	Porto Corsini power station	4		Teodora	368	operating	2002		CC	NG					Enel Produzione SpA [100.0%]	Enel SpA [100.0%]	44.4836	12.2652	exact	Porto Corsini			Ravenna	https://www.gem.wiki/Porto_Corsini_power_station	L100000400418	G100000400419	IT0003128367	1	718	718	22	2042	2082	2122
oil/gas	Italy	Europe	Southern Europe	Porto Empedocle power station	2		Vigata	80	operating	2015		GT	NG					Enel Produzione SpA [100.0%]	Enel SpA [100.0%]	37.2876	13.5212	exact	Porto Empedocle			Agrigento	https://www.gem.wiki/Porto_Empedocle_power_station	L100000400421	G100000400420	IT0003128367	1	125		9	2055	2095	2135
oil/gas	Italy	Europe	Southern Europe	Porto Empedocle power station	1		Vigata	45	operating			ST	HFO					Enel Produzione SpA [100.0%]	Enel SpA [100.0%]	37.2876	13.5212	exact	Porto Empedocle			Agrigento	https://www.gem.wiki/Porto_Empedocle_power_station	L100000400421	G100000412802	IT0003128367	1	125	125	-99	40	80	120
oil/gas	Italy	Europe	Southern Europe	Priolo Gargallo power station	1			360	operating	2010		ISCC	NG/S					Enel Produzione SpA [100.0%]	Enel SpA [100.0%]	37.14	15.2159	exact	Priolo Gargallo			Syracuse	https://www.gem.wiki/Priolo_Gargallo_power_station	L100000400422	G100000400422	IT0003128367	1	743		14	2050	2090	2130
oil/gas	Italy	Europe	Southern Europe	Priolo Gargallo power station	2			383	operating	2010		ISCC	NG/S					Enel Produzione SpA [100.0%]	Enel SpA [100.0%]	37.14	15.2159	exact	Priolo Gargallo			Syracuse	https://www.gem.wiki/Priolo_Gargallo_power_station	L100000400422	G100000400423	IT0003128367	1	743	743	14	2050	2090	2130
oil/gas	Chile	Americas	Latin America and the Caribbean	Quintero power station	1	Termoeléctrica Quintero		128	operating	2009		GT	NG/D					Enel Generación Chile SA [100%]	Enel Generación Chile SA [100.0%]	-32.7875	-71.4858	exact	Quintero			Valparaíso	https://gem.wiki/Quintero_power_station	L100000406560	G100000406722	IT0003128367	1	255		15	2049	2089	2129
oil/gas	Chile	Americas	Latin America and the Caribbean	Quintero power station	2	Termoeléctrica Quintero		127	operating	2009		GT	NG/D					Enel Generación Chile SA [100%]	Enel Generación Chile SA [100.0%]	-32.7875	-71.4858	exact	Quintero			Valparaíso	https://gem.wiki/Quintero_power_station	L100000406560	G100000406721	IT0003128367	1	255	255	15	2049	2089	2129
oil/gas	Italy	Europe	Southern Europe	Rossano power station	1			112	operating	1995		GT	NG					Enel SpA [100.0%]	Enel SpA [100.0%]	39.6218	16.6084	exact	Rossano			Cosenza	https://www.gem.wiki/Rossano_power_station	L100000400430	G100000400430	IT0003128367	1	224		29	2035	2075	2115
oil/gas	Italy	Europe	Southern Europe	Rossano power station	3			112	operating	1996		GT	NG					Enel SpA [100.0%]	Enel SpA [100.0%]	39.6218	16.6084	exact	Rossano			Cosenza	https://www.gem.wiki/Rossano_power_station	L100000400430	G100000400431	IT0003128367	1	224	224	28	2036	2076	2116
oil/gas	Spain	Europe	Southern Europe	Rossello Mill power station	1			23	operating	1998		GT	NG					Enel Green Power SpA [100.0%]	Enel SpA [100.0%]	41.6942	0.59499	approximate	Rossello			Lleida	https://www.gem.wiki/Rossello_Mill_power_station	L100000400706	G100000400706	IT0003128367	1	23	23	26	2038	2078	2118
oil/gas	Chile	Americas	Latin America and the Caribbean	San Isidro power station (Chile)	I	Planta Eléctrica San Isidro		372	operating	1998		CC	NG/D					Enel Generación Chile SA [100%]	Enel Generación Chile SA [100.0%]	-32.936	-71.315	exact	Quillota			Valparaíso	https://gem.wiki/San_Isidro_power_station_(Chile)	L100000406562	G100000406719	IT0003128367	1	752		26	2038	2078	2118
oil/gas	Chile	Americas	Latin America and the Caribbean	San Isidro power station (Chile)	II	Planta Eléctrica San Isidro		380	operating	2008		CC	NG/D					Enel Generación Chile SA [100%]	Enel Generación Chile SA [100.0%]	-32.936	-71.315	exact	Quillota			Valparaíso	https://gem.wiki/San_Isidro_power_station_(Chile)	L100000406562	G100000406720	IT0003128367	1	752	752	16	2048	2088	2128
oil/gas	Italy	Europe	Southern Europe	Santa Barbara power station	1			392	operating	2006		CC	NG					Enel SpA [100.0%]	Enel SpA [100.0%]	43.565	11.4777	exact	Meleto Valdarno			Arezzo	https://www.gem.wiki/Santa_Barbara_power_station	L100000400436	G100000400436	IT0003128367	1	642	642	18	2046	2086	2126
oil/gas	Peru	Americas	Latin America and the Caribbean	Santa Rosa power station	TG-7	Central Termoeléctrica Santa Rosa		128	operating	2005		GT	NG/D					Enel Generación Perú SAA [100%]	Enel Generación Perú SAA [100.0%]	-12.0395	-77.0106	exact	Cercado de Lima		Lima	Lima	https://gem.wiki/Santa_Rosa_power_station	L100000406612	G100000406644	IT0003128367	1	448		19	2045	2085	2125
oil/gas	Peru	Americas	Latin America and the Caribbean	Santa Rosa power station	TG-5	Central Termoeléctrica Santa Rosa		60	operating	2009		GT	D/NG					Enel Generación Perú SAA [100%]	Enel Generación Perú SAA [100.0%]	-12.0395	-77.0106	exact	Cercado de Lima		Lima	Lima	https://gem.wiki/Santa_Rosa_power_station	L100000406612	G100000406646	IT0003128367	1	448		15	2049	2089	2129
oil/gas	Peru	Americas	Latin America and the Caribbean	Santa Rosa power station	TG-6	Central Termoeléctrica Santa Rosa		60	operating	2009		GT	D/NG					Enel Generación Perú SAA [100%]	Enel Generación Perú SAA [100.0%]	-12.0395	-77.0106	exact	Cercado de Lima		Lima	Lima	https://gem.wiki/Santa_Rosa_power_station	L100000406612	G100000406645	IT0003128367	1	448		15	2049	2089	2129
oil/gas	Peru	Americas	Latin America and the Caribbean	Santa Rosa power station	TG-8	Central Termoeléctrica Santa Rosa		200	operating	2009		GT	NG					Enel Generación Perú SAA [100%]	Enel Generación Perú SAA [100.0%]	-12.0395	-77.0106	exact	Cercado de Lima		Lima	Lima	https://gem.wiki/Santa_Rosa_power_station	L100000406612	G100000406643	IT0003128367	1	448	448	15	2049	2089	2129
oil/gas	Chile	Americas	Latin America and the Caribbean	Taltal power station	1	Termoeléctrica Taltal		120	operating	2000		GT	NG/D					Enel Generación Chile SA [100%]	Enel Generación Chile SA [100.0%]	-24.9888	-70.466	exact	Taltal			Antofagasta	https://gem.wiki/Taltal_power_station	L100000406563	G100000406718	IT0003128367	1	370		24	2040	2080	2120
oil/gas	Chile	Americas	Latin America and the Caribbean	Taltal power station	2	Termoeléctrica Taltal		120	operating	2000		GT	NG/D					Enel Generación Chile SA [100%]	Enel Generación Chile SA [100.0%]	-24.9888	-70.466	exact	Taltal			Antofagasta	https://gem.wiki/Taltal_power_station	L100000406563	G100000406717	IT0003128367	1	370		24	2040	2080	2120
oil/gas	Chile	Americas	Latin America and the Caribbean	Taltal power station	ST	Termoeléctrica Taltal		130	cancelled			ST	WSTH-NG					Enel Generación Chile SA [100%]	Enel Generación Chile SA [100.0%]	-24.9888	-70.466	exact	Taltal			Antofagasta	https://gem.wiki/Taltal_power_station	L100000406563	G100000410172	IT0003128367	1	370	370	-99	40	80	120
oil/gas	Italy	Europe	Southern Europe	Termini Imerese power station	Ti6		Ettore Majorana Power Plant	735	operating	2004		CC	NG					Enel SpA [100.0%]	Enel SpA [100.0%]	37.968	13.7508	exact	Termini Imerese			Palermo	https://www.gem.wiki/Termini_Imerese_power_station	L100000400461	G100000400464	IT0003128367	1	1521		20	2044	2084	2124
oil/gas	Italy	Europe	Southern Europe	Termini Imerese power station	1		Ettore Majorana Power Plant	150	pre-construction	2024		GT	NG					Enel SpA [100.0%]	Enel SpA [100.0%]	37.968	13.7508	exact	Termini Imerese			Palermo	https://www.gem.wiki/Termini_Imerese_power_station	L100000400461	G100000410765	IT0003128367	1	1521		0	2064	2104	2144
oil/gas	Italy	Europe	Southern Europe	Termini Imerese power station	2		Ettore Majorana Power Plant	150	pre-construction	2024		GT	NG					Enel SpA [100.0%]	Enel SpA [100.0%]	37.968	13.7508	exact	Termini Imerese			Palermo	https://www.gem.wiki/Termini_Imerese_power_station	L100000400461	G100000410764	IT0003128367	1	1521		0	2064	2104	2144
oil/gas	Italy	Europe	Southern Europe	Termini Imerese power station	Ti41		Ettore Majorana Power Plant	250	mothballed		2023	CC	NG					Enel SpA [100.0%]	Enel SpA [100.0%]	37.968	13.7508	exact	Termini Imerese			Palermo	https://www.gem.wiki/Termini_Imerese_power_station	L100000400461	G100000400461	IT0003128367	1	1521		-99	40	80	120
oil/gas	Italy	Europe	Southern Europe	Termini Imerese power station	Ti53		Ettore Majorana Power Plant	118	mothballed		2023	GT	NG					Enel SpA [100.0%]	Enel SpA [100.0%]	37.968	13.7508	exact	Termini Imerese			Palermo	https://www.gem.wiki/Termini_Imerese_power_station	L100000400461	G100000400462	IT0003128367	1	1521		-99	40	80	120
oil/gas	Italy	Europe	Southern Europe	Termini Imerese power station	Ti54		Ettore Majorana Power Plant	118	mothballed		2023	GT	NG					Enel SpA [100.0%]	Enel SpA [100.0%]	37.968	13.7508	exact	Termini Imerese			Palermo	https://www.gem.wiki/Termini_Imerese_power_station	L100000400461	G100000400463	IT0003128367	1	1521	1521	-99	40	80	120
oil/gas	Italy	Europe	Southern Europe	Torrevaldaliga Nord power station	CC	Torrevaldaliga nord	Civitavecchia	800	cancelled			CC	NG					Enel SpA [100.0%]	Enel SpA [100.0%]	42.1269	11.7583	exact	Civitavecchia			Rome	https://www.gem.wiki/Torrevaldaliga_Nord_power_station	L100000102854	G100000401336	IT0003128367	1	2780	2780	-99	40	80	120
oil/gas	Peru	Americas	Latin America and the Caribbean	Ventanilla power station	TG3-TG4-TV7	Central Termoeléctrica Ventanilla		524	operating	2006		CC	NG/D					Enel Generación Perú SAA [100%]	Enel Generación Perú SAA [100.0%]	-11.9358	-77.118	exact	Ventanilla		Callao	Callao	https://gem.wiki/Ventanilla_power_station	L100000406616	G100000406641	IT0003128367	1	524	524	18	2046	2086	2126
solar	United States	Americas	Northern America	25 Mile Creek solar farm				250	operating	2023		PV						Enel Green Power SPA		36.487	-99.739	exact		Ellis County		Oklahoma	https://gem.wiki/25_Mile_Creek_solar_farm	L808373	G810564	IT0003128367	1	250	250	1	2063	2103	2143
solar	South Africa	Africa	Sub-Saharan Africa	Adams Aurora solar farm	2		Adams Solar PV 2 Solar Farm	75	operating	2017		PV						Enel Green Power SPA		-27.3656	23.0131	exact	Joe Morolong Local Municipality	John Taolo Gaetsewe District Municipality		Northern Cape	https://gem.wiki/Adams_Aurora_solar_farm	L800007	G800007	IT0003128367	1	75	75	7	2057	2097	2137
solar	Greece	Europe	Southern Europe	Agkinara - Veli solar farm		Αγκιναρα - Βελη		6.5	operating			PV						Enel Green Power Greece SA		37.9001	21.2319	exact		Elis Regional Unit	Western Greece	Peloponnese, Western Greece and the Ionian	https://gem.wiki/Agkinara_-_Veli_solar_farm	L822277	G825326	IT0003128367	1	6.5	6.5	-99	40	80	120
solar	Greece	Europe	Southern Europe	Agrilia Baka solar farm		Αγριλια Μπακα		4.9	operating			PV						Enel Green Power Greece SA		37.084	21.6299	exact	Gargalianoi Municipal Unit	Messenia Regional Unit	Peloponnese Region	Peloponnese, Western Greece and the Ionian	https://gem.wiki/Agrilia_Baka_solar_farm	L822279	G825328	IT0003128367	1	4.9	4.9	-99	40	80	120
solar	Spain	Europe	Southern Europe	Alfajarín solar farm				90	pre-construction			PV						Enel Green Power		41.614	-0.7038	approximate		Zaragoza		Aragon	https://gem.wiki/Alfajarín_solar_farm	L824311	G827421	IT0003128367	1	90	90	-99	40	80	120
solar	Portugal	Europe	Southern Europe	Algarve solar farm				99	announced	2024		PV						Enel Green Power SPA		38.0371	-8.2869	approximate			Ferreira do Alentejo	Algarve	https://gem.wiki/Algarve_solar_farm	L805791	G806665	IT0003128367	1	99	99	0	2064	2104	2144
solar	Spain	Europe	Southern Europe	Aljarafe solar farm				69.6	pre-construction			PV						Enel Green Power		37.4193	-6.1095	approximate	Salteras				https://gem.wiki/Aljarafe_solar_farm	L824316	G827427	IT0003128367	1	69.6	69.6	-99	40	80	120
solar	Italy	Europe	Southern Europe	Archetype CSP solar farm				30	cancelled			Solar Thermal						Enel SPA		37.7571	14.1678	approximate				Sicily	https://gem.wiki/Archetype_CSP_solar_farm	L822853	G825919	IT0003128367	1	30	30	-99	40	80	120
solar	Greece	Europe	Southern Europe	Avdira Pezoyla solar farm		Αβδηρα Πεζουλα		2.8	operating			PV						Enel Green Power Greece SA		40.9971	24.9493	exact		Xanthi Regional Unit	Eastern Macedonia and Thrace	Macedonia and Thrace	https://gem.wiki/Avdira_Pezoyla_solar_farm	L822310	G825361	IT0003128367	1	2.8	2.8	-99	40	80	120
solar	Greece	Europe	Southern Europe	Axiochori solar farm		Αξιοχωρι		6.2	operating			PV						Enel Green Power Greece SA		40.8592	22.6749	exact		Kilkis Regional Unit	Central Macedonia	Macedonia and Thrace	https://gem.wiki/Axiochori_solar_farm	L822313	G825364	IT0003128367	1	6.2	6.2	-99	40	80	120
solar	Greece	Europe	Southern Europe	Ayios Athanasiou (Enel) solar farm		Ι. Μ. Αγ. Αθανασιου		6	operating			PV						Enel Green Power Greece SA		40.4596	22.4914	exact		Pieria Regional Unit	Central Macedonia	Macedonia and Thrace	https://gem.wiki/Ayios_Athanasiou_(Enel)_solar_farm	L822316	G825368	IT0003128367	1	6	6	-99	40	80	120
solar	Greece	Europe	Southern Europe	Ayios Ioannis - Vamvakies solar farm		Αγιος Ιωαννης - Βαμβακιες		6.5	operating			PV						Enel Green Power Greece SA		40.3706	22.1191	exact		Kozani Regional Unit	Western Macedonia	Epirus and Western Macedonia	https://gem.wiki/Ayios_Ioannis_-_Vamvakies_solar_farm	L822320	G825372	IT0003128367	1	6.5	6.5	-99	40	80	120
solar	Chile	Americas	Latin America and the Caribbean	Azabache Photovoltaic Solar Park	1	Parque Solar Fotovoltaico Azabache		77	operating	2021		PV						Enel Chile		-22.487	-68.822	exact			Calama	Antofagasta	https://gem.wiki/Azabache_Photovoltaic_Solar_Park	L807160	G808392	IT0003128367	1	81.6		3	2061	2101	2141
solar	Chile	Americas	Latin America and the Caribbean	Azabache Photovoltaic Solar Park	Extension	Parque Solar Fotovoltaico Azabache		4.6	construction			PV						Enel Chile		-22.4843	-68.8214	exact	Calama	Provincia de El Loa		Antofagasta Region	https://gem.wiki/Azabache_Photovoltaic_Solar_Park	L807160	G810075	IT0003128367	1	81.6	81.6	-99	40	80	120
solar	Panama	Americas	Latin America and the Caribbean	Baco solar farm		Parque Solar Baco		25.9	operating	2023		PV						Enel Green Power SPA		8.3844	-82.7862	approximate		Distrito Barú		Chiriquí	https://gem.wiki/Baco_solar_farm	L807731	G809422	IT0003128367	1	25.9	25.9	1	2063	2103	2143
solar	Greece	Europe	Southern Europe	Batzia Bechloule solar farm		Μπατζια - Μπεχλουλε		100	announced			PV						Enel Green Power Greece SA		39.3699	22.7114	exact		Regional Unit of Magnesia	Thessaly	Thessaly and Central Greece	https://gem.wiki/Batzia_Bechloule_solar_farm	L806281	G807216	IT0003128367	1	100	100	-99	40	80	120
solar	Egypt	Africa	Northern Africa	Benban Enel solar farm				47	cancelled			PV						Enel SPA		24.0677	32.8959	approximate	Benban	Markaz Deraw		Aswan Governorate	https://gem.wiki/Benban_Enel_solar_farm	L800044	G800057	IT0003128367	1	47	47	-99	40	80	120
solar	United States	Americas	Northern America	Blue Jay Solar			Blue Jay Grimes	210	construction	2023		PV						Enel Green Power SPA		30.7115	-96.0641	exact	Iola	Grimes County		Texas	https://gem.wiki/Blue_Jay_Solar	L805043	G805814	IT0003128367	1	210	210	1	2063	2103	2143
solar	Brazil	Americas	Latin America and the Caribbean	Bom Jesus Da Lapa Solar Park	2	Parque Solar Bom Jesus da Lapa	BJL Solar Park, BJL ENEL	24	operating	2017		PV						Enel Green Power SPA		-13.3191	-43.3504	exact	Bom Jesus da Lapa		Região Geográfica Intermediária de Guanambi	Bahia	https://gem.wiki/Bom_Jesus_Da_Lapa_Solar_Park	L807153	G808350	IT0003128367	1	48		7	2057	2097	2137
solar	Brazil	Americas	Latin America and the Caribbean	Bom Jesus Da Lapa Solar Park	6	Parque Solar Bom Jesus da Lapa	BJL Solar Park, BJL ENEL	24	operating	2017		PV						Enel Green Power SPA		-13.3227	-43.354	exact	Bom Jesus da Lapa		Região Geográfica Intermediária de Guanambi	Bahia	https://gem.wiki/Bom_Jesus_Da_Lapa_Solar_Park	L807153	G808351	IT0003128367	1	48	48	7	2057	2097	2137
solar	United States	Americas	Northern America	Boone Stephens Solar				64	cancelled			PV						Enel Green Power SPA		38.9532	-92.3314	approximate		Boone County		Missouri	https://gem.wiki/Boone_Stephens_Solar	L804897	G805640	IT0003128367	1	64	64	-99	40	80	120
solar	Australia	Oceania	Australia and New Zealand	Bouldercombe solar farm				286	pre-construction			PV						Enel Green Power SPA		-23.5272	150.48	exact	Bouldercombe			Queensland	https://gem.wiki/Bouldercombe_solar_farm	L805536	G806375	IT0003128367	1	286	286	-99	40	80	120
solar	Australia	Oceania	Australia and New Zealand	Bungala solar farm	1			138	operating	2018		PV						Enel Green Power SPA [50%]; DIF Capital Partners [50%]		-32.4229	137.841	exact		Port Augusta City Council		South Australia	https://gem.wiki/Bungala_solar_farm	L827481	G830977	IT0003128367	0.5	275		6	2058	2098	2138
solar	Australia	Oceania	Australia and New Zealand	Bungala solar farm	2			137	operating	2019		PV						Enel Green Power SPA [50%]; DIF Capital Partners [50%]		-32.4078	137.84	exact		Port Augusta City Council		South Australia	https://gem.wiki/Bungala_solar_farm	L827481	G830978	IT0003128367	0.5	275	275	5	2059	2099	2139
solar	Spain	Europe	Southern Europe	Calatrava 1 solar farm			Cluster Calatrava	22.3	operating	2022		PV						Enel Green Power		38.9935	-3.3951	approximate		La Mancha	Ciudad Real	Castile-La Mancha	https://gem.wiki/Calatrava_1_solar_farm	L824402	G827529	IT0003128367	1	22.3	22.3	2	2062	2102	2142
solar	Romania	Europe	Eastern Europe	Călugareni solar farm			Cef Calugareni	63	pre-construction			PV						Enel Green Power SPA		44.7084	25.8888	approximate	Călugareni	Giurgiu County		Muntenia	https://gem.wiki/Călugareni_solar_farm	L806279	G807214	IT0003128367	1	63	63	-99	40	80	120
solar	Chile	Americas	Latin America and the Caribbean	Campos Del Sol Photovoltaic Solar Plant		Planta Solar Fotovoltaica Campos del Sol		393	operating	2023		PV						Enel Chile		-27.1561	-70.4979	approximate			Copiapó	Atacama	https://gem.wiki/Campos_Del_Sol_Photovoltaic_Solar_Plant	L807161	G808393	IT0003128367	1	393	393	1	2063	2103	2143
solar	Chile	Americas	Latin America and the Caribbean	Carrera Pinto solar farm		Planta Solar Carrera Pinto		97	operating	2016		PV						Enel Chile		-27.0045	-69.871	exact	Copiapó	Provincia de Copiapó	Copiapó	Atacama Region	https://gem.wiki/Carrera_Pinto_solar_farm	L807162	G808394	IT0003128367	1	97	97	8	2056	2096	2136
solar	Spain	Europe	Southern Europe	Castilblanco solar farm				42.9	operating	2019		PV						Enel Green Power		39.2857	-5.0957	approximate			Badajoz	Extremadura	https://gem.wiki/Castilblanco_solar_farm	L824438	G827576	IT0003128367	1	42.9	42.9	5	2059	2099	2139
solar	Greece	Europe	Southern Europe	Chamolio solar farm		Χαμωλιο		4.8	operating			PV						Enel Green Power Greece SA		37.9608	21.348	exact		Elis Regional Unit	Western Greece	Peloponnese, Western Greece and the Ionian	https://gem.wiki/Chamolio_solar_farm	L822340	G825392	IT0003128367	1	4.8	4.8	-99	40	80	120
solar	Chile	Americas	Latin America and the Caribbean	Chañares Solar Plant		Planta Solar Chañares		40	operating	2014		PV						Enel Chile		-26.375	-70.0801	exact				Atacama	https://gem.wiki/Chañares_Solar_Plant	L807163	G808395	IT0003128367	1	40	40	10	2054	2094	2134
solar	Panama	Americas	Latin America and the Caribbean	Chiriquí solar farm		Parque Solar Chiriquí		9	operating	2015		PV						Enel Green Power SPA		8.2702	-82.0022	approximate		Distrito San Lorenzo		Chiriquí	https://gem.wiki/Chiriquí_solar_farm	L807741	G809432	IT0003128367	1	9	9	9	2055	2095	2135
solar	Greece	Europe	Southern Europe	Choirodasos solar farm		Χοιροδασος		4	operating			PV						Enel Green Power Greece SA		41.0065	24.9326	exact		Xanthi Regional Unit	Eastern Macedonia and Thrace	Macedonia and Thrace	https://gem.wiki/Choirodasos_solar_farm	L822347	G825399	IT0003128367	1	4	4	-99	40	80	120
solar	Peru	Americas	Latin America and the Caribbean	Clemesí Solar Plant		Central Solar Clemesí		116	construction	2023		PV						Enel Green Power SPA		-17.1981	-70.9368	approximate			Mariscal Nieto	Moquegua	https://gem.wiki/Clemesí_Solar_Plant	L807177	G808413	IT0003128367	1	116	116	1	2063	2103	2143
solar	Australia	Oceania	Australia and New Zealand	Cohuna solar farm				34	operating	2022		PV						Enel Green Power SPA		-35.8832	144.237	exact				Victoria	https://gem.wiki/Cohuna_solar_farm	L805541	G806380	IT0003128367	1	34	34	2	2062	2102	2142
solar	Brazil	Americas	Latin America and the Caribbean	Cumaru solar farm	1	Usina Solar Cumaru		21.5	pre-construction			PV						Enel Green Power SPA		-5.1283	-35.8346	exact			Região Geográfica Intermediária de Natal	Rio Grande do Norte	https://gem.wiki/Cumaru_solar_farm	L831705	G836078	IT0003128367	1	64.5		-99	40	80	120
solar	Brazil	Americas	Latin America and the Caribbean	Cumaru solar farm	2	Usina Solar Cumaru		43	pre-construction			PV						Enel Green Power SPA		-5.1297	-35.8279	exact			Região Geográfica Intermediária de Natal	Rio Grande do Norte	https://gem.wiki/Cumaru_solar_farm	L831705	G836079	IT0003128367	1	64.5	64.5	-99	40	80	120
solar	Greece	Europe	Southern Europe	Daouslar (Enel Green Power) solar farm		Νταουσλαρ		2	operating			PV						Enel Green Power Greece SA		39.7926	22.422	exact		Larisa Regional Unit	Thessaly	Thessaly and Central Greece	https://gem.wiki/Daouslar_(Enel_Green_Power)_solar_farm	L822356	G825408	IT0003128367	1	2	2	-99	40	80	120
solar	Chile	Americas	Latin America and the Caribbean	Diego De Almagro Photovoltaic Solar Plant		Planta Solar Fotovoltaica Diego de Almagro		36	operating	2014		PV						Enel Chile		-26.3711	-70.0779	exact		Provincia de Chañaral		Atacama Region	https://gem.wiki/Diego_De_Almagro_Photovoltaic_Solar_Plant	L807164	G808396	IT0003128367	1	36	36	10	2054	2094	2134
solar	Chile	Americas	Latin America and the Caribbean	Domeyko Solar Park	1	Parque Solar Domeyko		135	operating	2023		PV						Enel Chile		-33.4665	-70.673	approximate				Antofagasta	https://gem.wiki/Domeyko_Solar_Park	L807165	G808397	IT0003128367	1	205		1	2063	2103	2143
solar	Chile	Americas	Latin America and the Caribbean	Domeyko Solar Park	Extension	Parque Solar Domeyko		70	operating	2023		PV						Enel Chile		-33.4665	-70.673	approximate	Santiago	Provincia de Santiago		Santiago Metropolitan Region	https://gem.wiki/Domeyko_Solar_Park	L807165	G810078	IT0003128367	1	205	205	1	2063	2103	2143
solar	Chile	Americas	Latin America and the Caribbean	Don Humberto Solar Park		Parque Solar Don Humberto		79	construction	2024		PV						Enel Chile		-33.4361	-70.6096	approximate				Metropolitana	https://gem.wiki/Don_Humberto_Solar_Park	L807117	G808267	IT0003128367	1	79	79	0	2064	2104	2144
solar	Spain	Europe	Southern Europe	Dulcinea solar farm				95.2	construction	2023		PV						Enel Green Power		37.5041	-5.7135	approximate			Sevilla	Andalusia	https://gem.wiki/Dulcinea_solar_farm	L824493	G827647	IT0003128367	1	95.2	95.2	1	2063	2103	2143
solar	Greece	Europe	Southern Europe	Ekta Domokou solar farm		Εκτα		2	operating			PV						Enel Green Power Greece SA		39.0834	22.3317	exact	Δημοτική Ενότητα Δομοκού	Phthiotis Regional Unit	Central Greece	Thessaly and Central Greece	https://gem.wiki/Ekta_Domokou_solar_farm	L822381	G825434	IT0003128367	1	2	2	-99	40	80	120
solar	Chile	Americas	Latin America and the Caribbean	El Manzano solar farm		Parque Solar El Manzano		101	construction			PV						Enel Chile		-33.2224	-70.5591	approximate	Colina	Provincia de Chacabuco		Santiago Metropolitan Region	https://gem.wiki/El_Manzano_solar_farm	L807982	G810080	IT0003128367	1	101	101	-99	40	80	120
solar	Colombia	Americas	Latin America and the Caribbean	El Paso PV Solar Park		Planta Solar El Paso		86	operating	2023		PV						Enel Green Power SPA		9.7815	-73.7201	exact		El Paso	El Paso	Cesar	https://gem.wiki/El_Paso_PV_Solar_Park	L807172	G808406	IT0003128367	1	86	86	1	2063	2103	2143
solar	Spain	Europe	Southern Europe	Encina al Sol solar farm				35.8	construction			PV						Enel Green Power		38.6648	-4.1406	approximate		Campo de Calatrava	Ciudad Real	Castile-La Mancha	https://gem.wiki/Encina_al_Sol_solar_farm	L824522	G827684	IT0003128367	1	35.8	35.8	-99	40	80	120
solar	Spain	Europe	Southern Europe	Esparragal solar farm	1		Guillena	50	operating	2022		PV						Enel Green Power España		37.5499	-6.0947	exact			Sevilla	Andalusia	https://gem.wiki/Esparragal_solar_farm	L824534	G827700	IT0003128367	1	50	50	2	2062	2102	2142
solar	Panama	Americas	Latin America and the Caribbean	Esperanza solar farm (Panama)		Parque Solar Esperanza	Esperanza Chiriqui, Bajo Frio 2	26	operating	2021		PV						Enel Green Power SPA		8.4201	-82.8077	exact		Progreso	Barú	Chiriquí	https://gem.wiki/Esperanza_solar_farm_(Panama)	L807175	G808411	IT0003128367	1	26	26	3	2061	2101	2141
solar	Panama	Americas	Latin America and the Caribbean	Estrella solar farm		Parque Solar Estrella		8	operating	2018		PV						Enel Green Power SPA		8.2511	-81.988	exact		Distrito San Lorenzo		Chiriquí	https://gem.wiki/Estrella_solar_farm	L807753	G809448	IT0003128367	1	8	8	6	2058	2098	2138
solar	Spain	Europe	Southern Europe	Estrella Solar PV solar farm				35.8	construction			PV						Enel Green Power		38.6648	-4.1406	approximate		Campo de Calatrava	Ciudad Real	Castile-La Mancha	https://gem.wiki/Estrella_Solar_PV_solar_farm	L824537	G827703	IT0003128367	1	35.8	35.8	-99	40	80	120
solar	Spain	Europe	Southern Europe	Eugenia solar farm (Spain)				38.2	construction			PV						Enel Green Power		41.8418	-2.0457	approximate			Soria	Castile and León	https://gem.wiki/Eugenia_solar_farm_(Spain)	L824538	G827704	IT0003128367	1	38.2	38.2	-99	40	80	120
solar	Chile	Americas	Latin America and the Caribbean	Finis Terrae Photovoltaic Solar Plant	1	Planta Solar Fotovoltaico Finis Terrae	ex Crucero Oeste	160	operating	2016		PV						Enel Chile		-22.342	-69.522	exact		Maria Elena		Antofagasta	https://gem.wiki/Finis_Terrae_Photovoltaic_Solar_Plant	L807166	G808398	IT0003128367	1	286		8	2056	2096	2136
solar	Chile	Americas	Latin America and the Caribbean	Finis Terrae Photovoltaic Solar Plant	2	Planta Solar Fotovoltaico Finis Terrae		126	operating	2022		PV						Enel Chile		-22.342	-69.522	approximate		Maria Elena		Antofagasta	https://gem.wiki/Finis_Terrae_Photovoltaic_Solar_Plant	L807166	G808399	IT0003128367	1	286	286	2	2062	2102	2142
solar	Brazil	Americas	Latin America and the Caribbean	Fontes Solar Plant	1	Usina Fontes Solar		5	operating			PV						Enel Green Power SPA		-9.0701	-38.1499	approximate			Região Geográfica Intermediária de Serra Talhada	Pernambuco	https://gem.wiki/Fontes_Solar_Plant	L807893	G809770	IT0003128367	1	10		-99	40	80	120
solar	Brazil	Americas	Latin America and the Caribbean	Fontes Solar Plant	2	Usina Fontes Solar		5	operating			PV						Enel Green Power SPA		-9.0701	-38.1499	approximate			Região Geográfica Intermediária de Serra Talhada	Pernambuco	https://gem.wiki/Fontes_Solar_Plant	L807893	G809771	IT0003128367	1	10	10	-99	40	80	120
solar	Greece	Europe	Southern Europe	Gephyria solar farm	1, 2	Γεφυρια Ι		3.5	operating			PV						Enel Green Power Greece SA		39.2971	22.1801	exact	Δημοτική Ενότητα Σοφάδων	Karditsa Regional Unit	Thessaly	Thessaly and Central Greece	https://gem.wiki/Gephyria_solar_farm	L822401	G825455	IT0003128367	1	3.5	3.5	-99	40	80	120
solar	Greece	Europe	Southern Europe	Giatsovo solar farm		Γιατσοβο		1.5	operating			PV						Enel Green Power Greece SA		40.8343	21.4617	exact		Florina Regional Unit	Western Macedonia	Epirus and Western Macedonia	https://gem.wiki/Giatsovo_solar_farm	L822404	G825458	IT0003128367	1	1.5	1.5	-99	40	80	120
solar	Colombia	Americas	Latin America and the Caribbean	Guayepo PV Solar Park	1 & 2	Parque Solar Fotovoltaico Guayepo		487	construction	2024		PV						Enel Green Power SPA		10.6054	-74.7826	approximate			Ponedera	Atlantico	https://gem.wiki/Guayepo_PV_Solar_Park	L807173	G808407	IT0003128367	1	487	487	0	2064	2104	2144
solar	Brazil	Americas	Latin America and the Caribbean	Horizonte Solar Park	1	Parque Solar Horizonte		29	operating	2018		PV						Enel Green Power SPA		-12.609	-44.0852	exact	Tabocas do Brejo Velho		Região Geográfica Intermediária de Barreiras	Bahia	https://gem.wiki/Horizonte_Solar_Park	L807154	G808354	IT0003128367	1	78		6	2058	2098	2138
solar	Brazil	Americas	Latin America and the Caribbean	Horizonte Solar Park	11	Parque Solar Horizonte		20	operating	2018		PV						Enel Green Power SPA		-12.6394	-44.0848	exact	Tabocas do Brejo Velho		Região Geográfica Intermediária de Barreiras	Bahia	https://gem.wiki/Horizonte_Solar_Park	L807154	G808355	IT0003128367	1	78		6	2058	2098	2138
solar	Brazil	Americas	Latin America and the Caribbean	Horizonte Solar Park	2	Parque Solar Horizonte		29	operating	2018		PV						Enel Green Power SPA		-12.6141	-44.0896	exact	Tabocas do Brejo Velho		Região Geográfica Intermediária de Barreiras	Bahia	https://gem.wiki/Horizonte_Solar_Park	L807154	G808356	IT0003128367	1	78	78	6	2058	2098	2138
solar	Greece	Europe	Southern Europe	Iasmos solar farm		Ιασμος		2.7	operating			PV						Enel Green Power Greece SA		41.1159	25.0949	exact		Rodopi Regional Unit	Eastern Macedonia and Thrace	Macedonia and Thrace	https://gem.wiki/Iasmos_solar_farm	L822418	G825472	IT0003128367	1	2.7	2.7	-99	40	80	120
solar	Spain	Europe	Southern Europe	Iberelectrica 1 solar farm			Cluster Calatrava	22.3	operating	2022		PV						Enel Green Power		38.9935	-3.3951	approximate		La Mancha	Ciudad Real	Castile-La Mancha	https://gem.wiki/Iberelectrica_1_solar_farm	L824608	G827802	IT0003128367	1	22.3	22.3	2	2062	2102	2142
solar	Peru	Americas	Latin America and the Caribbean	Illari solar farm	Norte	Central Solar Illari		112.2	construction	2023		PV						Enel Green Power SPA		-16.4353	-71.836	approximate				Arequipa	https://gem.wiki/Illari_solar_farm	L808298	G838205	IT0003128367	1	423.8		1	2063	2103	2143
solar	Peru	Americas	Latin America and the Caribbean	Illari solar farm	Sur	Central Solar Illari		311.6	pre-construction	2024		PV						Enel Green Power SPA		-16.4027	-71.5344	approximate				Arequipa	https://gem.wiki/Illari_solar_farm	L808298	G810470	IT0003128367	1	423.8	423.8	0	2064	2104	2144
solar	Brazil	Americas	Latin America and the Caribbean	Ituverava Solar Plant	1	Parque Solar Ituverava		28	operating	2017		PV						Enel Green Power SPA		-12.5873	-44.1069	exact	Tabocas do Brejo Velho		Região Geográfica Intermediária de Barreiras	Bahia	https://gem.wiki/Ituverava_Solar_Plant	L807155	G808357	IT0003128367	1	196		7	2057	2097	2137
solar	Brazil	Americas	Latin America and the Caribbean	Ituverava Solar Plant	2	Parque Solar Ituverava		28	operating	2017		PV						Enel Green Power SPA		-12.5926	-44.1046	exact	Tabocas do Brejo Velho		Região Geográfica Intermediária de Barreiras	Bahia	https://gem.wiki/Ituverava_Solar_Plant	L807155	G808358	IT0003128367	1	196		7	2057	2097	2137
solar	Brazil	Americas	Latin America and the Caribbean	Ituverava Solar Plant	3	Parque Solar Ituverava		28	operating	2017		PV						Enel Green Power SPA		-12.5934	-44.0995	exact	Tabocas do Brejo Velho		Região Geográfica Intermediária de Barreiras	Bahia	https://gem.wiki/Ituverava_Solar_Plant	L807155	G808359	IT0003128367	1	196		7	2057	2097	2137
solar	Brazil	Americas	Latin America and the Caribbean	Ituverava Solar Plant	4	Parque Solar Ituverava		28	operating	2017		PV						Enel Green Power SPA		-12.599	-44.1038	exact	Tabocas do Brejo Velho		Região Geográfica Intermediária de Barreiras	Bahia	https://gem.wiki/Ituverava_Solar_Plant	L807155	G808360	IT0003128367	1	196		7	2057	2097	2137
solar	Brazil	Americas	Latin America and the Caribbean	Ituverava Solar Plant	5	Parque Solar Ituverava		28	operating	2017		PV						Enel Green Power SPA		-12.6015	-44.1041	exact	Tabocas do Brejo Velho		Região Geográfica Intermediária de Barreiras	Bahia	https://gem.wiki/Ituverava_Solar_Plant	L807155	G808361	IT0003128367	1	196		7	2057	2097	2137
solar	Brazil	Americas	Latin America and the Caribbean	Ituverava Solar Plant	6	Parque Solar Ituverava		28	operating	2017		PV						Enel Green Power SPA		-12.6035	-44.0933	exact	Tabocas do Brejo Velho		Região Geográfica Intermediária de Barreiras	Bahia	https://gem.wiki/Ituverava_Solar_Plant	L807155	G808362	IT0003128367	1	196		7	2057	2097	2137
solar	Brazil	Americas	Latin America and the Caribbean	Ituverava Solar Plant	7	Parque Solar Ituverava		28	operating	2017		PV						Enel Green Power SPA		-12.6042	-44.1158	exact	Tabocas do Brejo Velho		Região Geográfica Intermediária de Barreiras	Bahia	https://gem.wiki/Ituverava_Solar_Plant	L807155	G808363	IT0003128367	1	196	196	7	2057	2097	2137
solar	Panama	Americas	Latin America and the Caribbean	Jagüito solar farm		Parque Solar Jagüito		13.1	operating	2021		PV						Enel Green Power SPA		8.172	-80.6708	exact		Distrito Aguadulce		Coclé	https://gem.wiki/Jagüito_solar_farm	L807758	G809456	IT0003128367	1	13.1	13.1	3	2061	2101	2141
solar	Greece	Europe	Southern Europe	Kallidromo solar farm		Καλλιδρομο		188	pre-construction			PV						Enel Green Power Greece SA		38.7377	22.6396	exact	Municipal Unit of Molos	Phthiotis Regional Unit	Central Greece	Thessaly and Central Greece	https://gem.wiki/Kallidromo_solar_farm	L822431	G825485	IT0003128367	1	188	188	-99	40	80	120
solar	Greece	Europe	Southern Europe	Kaminia - Kolovoutselo solar farm		Καμινια - Κολοβουτσελο		2	operating			PV						Enel Green Power Greece SA		39.7595	20.6768	exact		Ioannina Regional Unit	Epirus	Epirus and Western Macedonia	https://gem.wiki/Kaminia_-_Kolovoutselo_solar_farm	L822437	G825492	IT0003128367	1	2	2	-99	40	80	120
solar	Greece	Europe	Southern Europe	Karydia solar farm		Καρυδια		3.1	operating			PV						Enel Green Power Greece SA		41.0204	24.967	exact		Xanthi Regional Unit	Eastern Macedonia and Thrace	Macedonia and Thrace	https://gem.wiki/Karydia_solar_farm	L822445	G825500	IT0003128367	1	3.1	3.1	-99	40	80	120
solar	Greece	Europe	Southern Europe	Kourtesi I solar farm		Κουρτεσι Ι		4.9	operating			PV						Enel Green Power Greece SA		37.9617	21.3441	exact		Elis Regional Unit	Western Greece	Peloponnese, Western Greece and the Ionian	https://gem.wiki/Kourtesi_I_solar_farm	L822487	G825543	IT0003128367	1	4.9	4.9	-99	40	80	120
solar	Greece	Europe	Southern Europe	Kryoneri (Enel Green Power) solar farm		Κρυονερι		3.6	operating			PV						Enel Green Power Greece SA		40.3395	21.3083	exact		Kozani Regional Unit	Western Macedonia	Epirus and Western Macedonia	https://gem.wiki/Kryoneri_(Enel_Green_Power)_solar_farm	L822497	G825554	IT0003128367	1	3.6	3.6	-99	40	80	120
solar	Chile	Americas	Latin America and the Caribbean	La Colonia solar farm		Parque Solar La Colonia		10.8	operating			PV						Enel Chile		-33.7328	-70.7425	approximate		Provincia de Maipo		Santiago Metropolitan Region	https://gem.wiki/La_Colonia_solar_farm	L832159	G837699	IT0003128367	1	10.8	10.8	-99	40	80	120
solar	Colombia	Americas	Latin America and the Caribbean	La Loma Solar Park		Parque Solar La Loma	La Loma Cesar	150	operating	2023		PV						Enel Green Power SPA		9.7063	-73.5222	approximate			La Loma	Cesar	https://gem.wiki/La_Loma_Solar_Park	L807174	G808408	IT0003128367	1	150	150	1	2063	2103	2143
solar	Mexico	Americas	Latin America and the Caribbean	La Magdalena solar farm	1	Parque Solar La Magdalena		220	operating	2019		PV						Enel Green Power SPA		19.1791	-98.1948	approximate				Tlaxcala	https://gem.wiki/La_Magdalena_solar_farm	L807150	G809323	IT0003128367	1	440		5	2059	2099	2139
solar	Mexico	Americas	Latin America and the Caribbean	La Magdalena solar farm	2	Parque Solar La Magdalena II		220	operating	2019		PV						Enel Green Power SPA		19.5521	-98.3534	exact		Benito Juárez		Tlaxcala	https://gem.wiki/La_Magdalena_solar_farm	L807150	G808345	IT0003128367	1	440	440	5	2059	2099	2139
solar	Spain	Europe	Southern Europe	La Revuelta solar farm				125.9	pre-construction			PV						Enel Green Power España		39.0011	-3.3712	approximate		La Mancha	Ciudad Real	Castile-La Mancha	https://gem.wiki/La_Revuelta_solar_farm	L824651	G827848	IT0003128367	1	125.9	125.9	-99	40	80	120
solar	Chile	Americas	Latin America and the Caribbean	Lalackama Solar Complex	1	Complejo Solar Lalackama		60	operating	2014		PV						Enel Chile		-25.1072	-70.3131	exact		Provincia de Antofagasta		Antofagasta Region	https://gem.wiki/Lalackama_Solar_Complex	L807167	G808400	IT0003128367	1	241		10	2054	2094	2134
solar	Chile	Americas	Latin America and the Caribbean	Lalackama Solar Complex	3	Complejo Solar Lalackama		181	construction	2023		PV						Enel Chile		-25.1072	-70.3131	approximate			Taltal	Antofagasta	https://gem.wiki/Lalackama_Solar_Complex	L807167	G808401	IT0003128367	1	241	241	1	2063	2103	2143
solar	Brazil	Americas	Latin America and the Caribbean	Lapa Solar Park	2	Parque Solar São Gonçalo	BJL Solar Park, BJL ENEL	39	operating	2017		PV						Enel Green Power Brasil Participações LTDA		-13.3187	-43.3593	exact	Bom Jesus da Lapa		Região Geográfica Intermediária de Guanambi	Bahia	https://gem.wiki/Lapa_Solar_Park	L807156	G808409	IT0003128367	1	158		7	2057	2097	2137
solar	Brazil	Americas	Latin America and the Caribbean	Lapa Solar Park	3	Parque Solar São Gonçalo	BJL Solar Park, BJL ENEL	39	operating	2017		PV						Enel Green Power Brasil Participações LTDA		-13.3201	-43.3682	exact	Bom Jesus da Lapa		Região Geográfica Intermediária de Guanambi	Bahia	https://gem.wiki/Lapa_Solar_Park	L807156	G808410	IT0003128367	1	158		7	2057	2097	2137
solar	Brazil	Americas	Latin America and the Caribbean	Lapa Solar Park	Bom Jesus da Lapa 1	Parque Solar Lapa	BJL Solar Park, BJL ENEL	40	operating	2017		PV						Enel Green Power SPA		-13.3002	-43.3235	exact	Bom Jesus da Lapa		Região Geográfica Intermediária de Guanambi	Bahia	https://gem.wiki/Lapa_Solar_Park	L807156	G808364	IT0003128367	1	158		7	2057	2097	2137
solar	Brazil	Americas	Latin America and the Caribbean	Lapa Solar Park	Bom Jesus da Lapa 2	Parque Solar Lapa	BJL Solar Park, BJL ENEL	40	operating	2017		PV						Enel Green Power SPA		-13.2978	-43.3241	exact	Bom Jesus da Lapa		Região Geográfica Intermediária de Guanambi	Bahia	https://gem.wiki/Lapa_Solar_Park	L807156	G808365	IT0003128367	1	158	158	7	2057	2097	2137
solar	United States	Americas	Northern America	Lily Solar Hybrid			Lily Kaufman	147	operating	2021		PV						Enel Green Power SPA		32.5333	-96.429	exact	Scurry	Kaufman County		Texas	https://gem.wiki/Lily_Solar_Hybrid	L804451	G805116	IT0003128367	1	147	147	3	2061	2101	2141
solar	Greece	Europe	Southern Europe	Limnochori solar farm		Λιμνοχωρι, Δ.Δ. Σαγαιϊκων		4.8	operating			PV						Enel Green Power Greece SA		38.1307	21.4527	exact	Municipal Unit of Movri	Achaea Regional Unit	Western Greece	Peloponnese, Western Greece and the Ionian	https://gem.wiki/Limnochori_solar_farm	L822514	G825571	IT0003128367	1	4.8	4.8	-99	40	80	120
solar	Chile	Americas	Latin America and the Caribbean	Los Manolos solar farm		Declaración de Impacto Ambiental Proyecto Fotovoltaico Los Manolos		79.5	pre-construction			PV						Enel Chile		-18.6178	-69.6062	approximate	Arica	Provincia de Arica		Arica and Parinacota Region	https://gem.wiki/Los_Manolos_solar_farm	L832187	G837728	IT0003128367	1	79.5	79.5	-99	40	80	120
solar	Panama	Americas	Latin America and the Caribbean	Madre Vieja PV Solar Plant		Planta Solar Madre Vieja	Bajo Frio 3	31	operating	2022		PV						Enel Green Power SPA		8.1166	-81.6237	approximate				Chiriquí	https://gem.wiki/Madre_Vieja_PV_Solar_Plant	L807176	G808412	IT0003128367	1	31	31	2	2062	2102	2142
solar	Mexico	Americas	Latin America and the Caribbean	Magdalena solar farm	1	Planta Solar Magdalena I		500	pre-construction			PV						Enel Green Power		19.5889	-98.1134	approximate				Tlaxcala	https://gem.wiki/Magdalena_solar_farm	L808359	G838114	IT0003128367	1	646		-99	40	80	120
solar	Mexico	Americas	Latin America and the Caribbean	Magdalena solar farm	2.2	Planta Solar Magdalena II Fase II		146	pre-construction			PV						Enel Green Power		19.5889	-98.1134	approximate				Tlaxcala	https://gem.wiki/Magdalena_solar_farm	L808359	G838115	IT0003128367	1	646	646	-99	40	80	120
solar	Italy	Europe	Southern Europe	Malvezzi solar farm				17	construction			PV						Enel SPA		44.7662	11.5022	approximate		Ferrara		Emilia-Romagna	https://gem.wiki/Malvezzi_solar_farm	L823339	G826405	IT0003128367	1	17	17	-99	40	80	120
solar	Ethiopia	Africa	Sub-Saharan Africa	Metehara solar farm			Metehara Solar Pv	100	shelved			PV						Enel Green Power SPA [80%]; Orchid Business Group [20%]		8.8884	40.0138	approximate	Metehara			Oromia	https://gem.wiki/Metehara_solar_farm	L800212	G800257	IT0003128367	0.8	100	100	-99	40	80	120
solar	Greece	Europe	Southern Europe	Mikre Yodzalaka Kai Petromadria solar farm		Μικρή Γοντζαλάκα Και Πετρομάντρια		35	announced			PV						Enel Green Power Greece SA		39.2632	22.5874	exact		Larisa Regional Unit	Thessaly	Thessaly and Central Greece	https://gem.wiki/Mikre_Yodzalaka_Kai_Petromadria_solar_farm	L806282	G807217	IT0003128367	1	35	35	-99	40	80	120
solar	Greece	Europe	Southern Europe	Mikre Yodzalaka solar farm		Μικρη Γοντζαλακα		75.2	pre-construction			PV						Enel Green Power Greece SA		39.2705	22.5978	exact		Larisa Regional Unit	Thessaly	Thessaly and Central Greece	https://gem.wiki/Mikre_Yodzalaka_solar_farm	L806283	G807218	IT0003128367	1	75.2	75.2	-99	40	80	120
solar	Spain	Europe	Southern Europe	Minglanilla solar farm	1			99.6	operating	2022		PV						Enel Green Power España		39.5331	-1.5974	approximate			Cuenca	Castile-La Mancha	https://gem.wiki/Minglanilla_solar_farm	L824728	G827932	IT0003128367	1	199.2		2	2062	2102	2142
solar	Spain	Europe	Southern Europe	Minglanilla solar farm	2			99.6	operating	2022		PV						Enel Green Power España		39.5331	-1.5974	approximate			Cuenca	Castile-La Mancha	https://gem.wiki/Minglanilla_solar_farm	L824728	G827933	IT0003128367	1	199.2	199.2	2	2062	2102	2142
solar	Romania	Europe	Eastern Europe	Moșteni solar farm			Cef Monsteni	26	pre-construction			PV						Enel Green Power SPA		44.7084	25.8888	approximate	Moșteni	Teleorman County		Muntenia	https://gem.wiki/Moșteni_solar_farm	L806280	G807215	IT0003128367	1	26	26	-99	40	80	120
solar	Zambia	Africa	Sub-Saharan Africa	Ngonye solar farm			Ngonye Solar PV Plant, Ngonye Solar PV Facility	34	operating	2019		PV						Enel Green Power SPA [80%]; Industrial Development CORP (IDC) [20%]		-15.5169	28.4286	exact			Kafue District	Lusaka Province	https://gem.wiki/Ngonye_solar_farm	L800229	G800275	IT0003128367	0.8	34	34	5	2059	2099	2139
solar	Spain	Europe	Southern Europe	Ninobe 3 solar farm			Cluster Calatrava	22.3	operating	2022		PV						Enel Green Power		38.9935	-3.3951	approximate		La Mancha	Ciudad Real	Castile-La Mancha	https://gem.wiki/Ninobe_3_solar_farm	L824761	G827971	IT0003128367	1	22.3	22.3	2	2062	2102	2142
solar	Italy	Europe	Southern Europe	Nola Cis solar farm				25	operating			PV						Enel Green Power SPA		40.9622	14.4885	exact		Napoli		Campania	https://gem.wiki/Nola_Cis_solar_farm	L805789	G806663	IT0003128367	1	25	25	-99	40	80	120
solar	Brazil	Americas	Latin America and the Caribbean	Nova Olinda Solar Power Plant	10	Usina Fotovoltaica Nova Olinda		30	operating	2017		PV						Enel Green Power SPA		-8.1941	-42.5596	exact	Ribeira do Piauí		Região Geográfica Intermediária de São Raimundo Nonato	Piauí	https://gem.wiki/Nova_Olinda_Solar_Power_Plant	L807158	G808367	IT0003128367	1	210		7	2057	2097	2137
solar	Brazil	Americas	Latin America and the Caribbean	Nova Olinda Solar Power Plant	11	Usina Fotovoltaica Nova Olinda		30	operating	2017		PV						Enel Green Power SPA		-8.1898	-42.5643	exact	Ribeira do Piauí		Região Geográfica Intermediária de São Raimundo Nonato	Piauí	https://gem.wiki/Nova_Olinda_Solar_Power_Plant	L807158	G808368	IT0003128367	1	210		7	2057	2097	2137
solar	Brazil	Americas	Latin America and the Caribbean	Nova Olinda Solar Power Plant	12	Usina Fotovoltaica Nova Olinda		30	operating	2017		PV						Enel Green Power SPA		-8.1801	-42.5609	exact	Ribeira do Piauí		Região Geográfica Intermediária de São Raimundo Nonato	Piauí	https://gem.wiki/Nova_Olinda_Solar_Power_Plant	L807158	G808369	IT0003128367	1	210		7	2057	2097	2137
solar	Brazil	Americas	Latin America and the Caribbean	Nova Olinda Solar Power Plant	13	Usina Fotovoltaica Nova Olinda		30	operating	2017		PV						Enel Green Power SPA		-7.9272	-42.6127	exact	Ribeira do Piauí		Região Geográfica Intermediária de São Raimundo Nonato	Piauí	https://gem.wiki/Nova_Olinda_Solar_Power_Plant	L807158	G808370	IT0003128367	1	210		7	2057	2097	2137
solar	Brazil	Americas	Latin America and the Caribbean	Nova Olinda Solar Power Plant	14	Usina Fotovoltaica Nova Olinda		30	operating	2017		PV						Enel Green Power SPA		-8.1774	-42.5639	exact	Ribeira do Piauí		Região Geográfica Intermediária de São Raimundo Nonato	Piauí	https://gem.wiki/Nova_Olinda_Solar_Power_Plant	L807158	G808371	IT0003128367	1	210		7	2057	2097	2137
solar	Brazil	Americas	Latin America and the Caribbean	Nova Olinda Solar Power Plant	8	Usina Fotovoltaica Nova Olinda		30	operating	2017		PV						Enel Green Power SPA		-8.2096	-42.5394	exact	Ribeira do Piauí		Região Geográfica Intermediária de São Raimundo Nonato	Piauí	https://gem.wiki/Nova_Olinda_Solar_Power_Plant	L807158	G808372	IT0003128367	1	210		7	2057	2097	2137
solar	Brazil	Americas	Latin America and the Caribbean	Nova Olinda Solar Power Plant	9	Usina Fotovoltaica Nova Olinda		30	operating	2017		PV						Enel Green Power SPA		-8.2165	-42.5382	exact	Ribeira do Piauí		Região Geográfica Intermediária de São Raimundo Nonato	Piauí	https://gem.wiki/Nova_Olinda_Solar_Power_Plant	L807158	G808373	IT0003128367	1	210	210	7	2057	2097	2137
solar	Brazil	Americas	Latin America and the Caribbean	Novo Lapa MP solar farm	1	Parque Solar Novo Lapa MP		44	pre-construction			PV						Enel Green Power SPA		-13.2378	-43.3534	exact			Região Geográfica Intermediária de Guanambi	Bahia	https://gem.wiki/Novo_Lapa_MP_solar_farm	L807932	G809885	IT0003128367	1	330.6		-99	40	80	120
solar	Brazil	Americas	Latin America and the Caribbean	Novo Lapa MP solar farm	2	Parque Solar Novo Lapa MP		44	pre-construction			PV						Enel Green Power SPA		-13.2427	-43.3413	exact			Região Geográfica Intermediária de Guanambi	Bahia	https://gem.wiki/Novo_Lapa_MP_solar_farm	L807932	G809886	IT0003128367	1	330.6		-99	40	80	120
solar	Brazil	Americas	Latin America and the Caribbean	Novo Lapa MP solar farm	3	Parque Solar Novo Lapa MP		44	pre-construction			PV						Enel Green Power SPA		-13.2452	-43.3476	exact			Região Geográfica Intermediária de Guanambi	Bahia	https://gem.wiki/Novo_Lapa_MP_solar_farm	L807932	G809887	IT0003128367	1	330.6		-99	40	80	120
solar	Brazil	Americas	Latin America and the Caribbean	Novo Lapa MP solar farm	4	Parque Solar Novo Lapa MP		44	pre-construction			PV						Enel Green Power SPA		-13.2411	-43.3583	exact			Região Geográfica Intermediária de Guanambi	Bahia	https://gem.wiki/Novo_Lapa_MP_solar_farm	L807932	G809888	IT0003128367	1	330.6		-99	40	80	120
solar	Brazil	Americas	Latin America and the Caribbean	Novo Lapa MP solar farm	5	Parque Solar Novo Lapa MP		44	pre-construction			PV						Enel Green Power SPA		-13.2483	-43.3398	exact			Região Geográfica Intermediária de Guanambi	Bahia	https://gem.wiki/Novo_Lapa_MP_solar_farm	L807932	G809889	IT0003128367	1	330.6		-99	40	80	120
solar	Brazil	Americas	Latin America and the Caribbean	Novo Lapa MP solar farm	6	Parque Solar Novo Lapa MP		44	pre-construction			PV						Enel Green Power SPA		-13.2556	-43.3459	exact			Região Geográfica Intermediária de Guanambi	Bahia	https://gem.wiki/Novo_Lapa_MP_solar_farm	L807932	G809890	IT0003128367	1	330.6		-99	40	80	120
solar	Brazil	Americas	Latin America and the Caribbean	Novo Lapa MP solar farm	7	Parque Solar Novo Lapa MP		37	pre-construction			PV						Enel Green Power SPA		-13.2497	-43.3526	exact			Região Geográfica Intermediária de Guanambi	Bahia	https://gem.wiki/Novo_Lapa_MP_solar_farm	L807932	G809891	IT0003128367	1	330.6		-99	40	80	120
solar	Brazil	Americas	Latin America and the Caribbean	Novo Lapa MP solar farm	8	Usina Solar Novo Lapa MP		29.6	pre-construction			PV						Enel Green Power SPA		-13.2549	-43.3555	exact			Região Geográfica Intermediária de Guanambi	Bahia	https://gem.wiki/Novo_Lapa_MP_solar_farm	L807932	G836709	IT0003128367	1	330.6	330.6	-99	40	80	120
solar	South Africa	Africa	Sub-Saharan Africa	Paleisheuwel Solar Power Plant			Electra Capital Solar Farm	83	operating	2016		Assumed PV						Enel Green Power SPA		-32.4148	18.7379	exact	Cederberg Local Municipality	West Coast District Municipality		Western Cape	https://gem.wiki/Paleisheuwel_Solar_Power_Plant	L800261	G800313	IT0003128367	1	83	83	8	2056	2096	2136
solar	Chile	Americas	Latin America and the Caribbean	Pampa Norte PV Solar Plant		Planta Solar Pampa Norte		85.3	operating	2015		PV						Enel Chile		-25.511	-70.166	exact		Provincia de Antofagasta	Taltal	Antofagasta Region	https://gem.wiki/Pampa_Norte_PV_Solar_Plant	L807168	G808402	IT0003128367	1	85.3	85.3	9	2055	2095	2135
solar	Greece	Europe	Southern Europe	Perasma Mavrodendri solar farm		Περασμα - Μαυροδενδρι		15	construction			PV						Enel Green Power Greece SA		40.3599	21.7537	exact		Kozani Regional Unit	Western Macedonia	Epirus and Western Macedonia	https://gem.wiki/Perasma_Mavrodendri_solar_farm	L822600	G825657	IT0003128367	1	15	15	-99	40	80	120
solar	Greece	Europe	Southern Europe	Perasma solar farm		Πέρασμα		70	construction	2023		PV						Enel Green Power Greece SA		40.3743	21.7494	exact	Mavrodendri	Kozani Regional Unit	Western Macedonia	Epirus and Western Macedonia	https://gem.wiki/Perasma_solar_farm	L822601	G825658	IT0003128367	1	70	70	1	2063	2103	2143
solar	Greece	Europe	Southern Europe	Perthori Bogdani Oxy solar farm		Περθορι - Μπογδανι - Οξυ		2.8	operating			PV						Enel Green Power Greece SA		37.8606	22.9356	exact	Municipal Unit of Saronikos	Corinthia Regional Unit	Peloponnese Region	Peloponnese, Western Greece and the Ionian	https://gem.wiki/Perthori_Bogdani_Oxy_solar_farm	L822604	G825662	IT0003128367	1	2.8	2.8	-99	40	80	120
solar	Greece	Europe	Southern Europe	Pezouliotika solar farm		Πεζουλιωτικα		3.5	operating			PV						Enel Green Power Greece SA		41.0242	24.9434	exact		Xanthi Regional Unit	Eastern Macedonia and Thrace	Macedonia and Thrace	https://gem.wiki/Pezouliotika_solar_farm	L822611	G825669	IT0003128367	1	3.5	3.5	-99	40	80	120
solar	Greece	Europe	Southern Europe	Platanos solar farm		Δ.Δ. Πλατανος		50	pre-construction			PV						Enel Green Power Greece SA		39.2196	22.5447	exact		Larisa Regional Unit	Thessaly	Thessaly and Central Greece	https://gem.wiki/Platanos_solar_farm	L806284	G807219	IT0003128367	1	50	50	-99	40	80	120
solar	Chile	Americas	Latin America and the Caribbean	PMGD Cabimas solar farm		Parque Solar PMGD Cabimas		10	operating			PV						Enel Chile		-35.5183	-71.6933	approximate		Cabimas			https://gem.wiki/PMGD_Cabimas_solar_farm	L832238	G837784	IT0003128367	1	10	10	-99	40	80	120
solar	Chile	Americas	Latin America and the Caribbean	PMGD Coinco solar farm		Parque Solar PMGD Coinco		3	construction			PV						Enel Chile		-34.2653	-70.9475	approximate		Coinco			https://gem.wiki/PMGD_Coinco_solar_farm	L832239	G837785	IT0003128367	1	3	3	-99	40	80	120
solar	Chile	Americas	Latin America and the Caribbean	PMGD Don Rodrigo solar farm		Parque Solar PMGD Don Rodrigo		5.4	operating			PV						Enel Chile		-34.1786	-70.7104	approximate		Don Rodrigo			https://gem.wiki/PMGD_Don_Rodrigo_solar_farm	L832240	G837786	IT0003128367	1	5.4	5.4	-99	40	80	120
solar	Chile	Americas	Latin America and the Caribbean	PMGD El Sharon solar farm		Parque Solar PMGD El Sharon		3	construction			PV						Enel Chile		-35.5183	-71.6933	approximate		El Sharon			https://gem.wiki/PMGD_El_Sharon_solar_farm	L832241	G837787	IT0003128367	1	3	3	-99	40	80	120
solar	Chile	Americas	Latin America and the Caribbean	PMGD La Colonia solar farm		Parque Solar PMGD La Colonia		10.5	operating	2023		PV						Enel Chile		-35.5183	-71.6933	approximate		La Colonia			https://gem.wiki/PMGD_La_Colonia_solar_farm	L832242	G837788	IT0003128367	1	10.5	10.5	1	2063	2103	2143
solar	Chile	Americas	Latin America and the Caribbean	PMGD Patagua solar farm		Parque Solar PMGD Patagua		10	operating			PV						Enel Chile		-35.6802	-71.3864	approximate		Patagua			https://gem.wiki/PMGD_Patagua_solar_farm	L832243	G837789	IT0003128367	1	10	10	-99	40	80	120
solar	Chile	Americas	Latin America and the Caribbean	PMGD Rinconada de Alcones solar farm		Parque Solar PMGD Rinconada de Alcones		10.5	construction			PV						Enel Chile		-34.3561	-71.7348	approximate		Rinconada de Alcones			https://gem.wiki/PMGD_Rinconada_de_Alcones_solar_farm	L832244	G837790	IT0003128367	1	10.5	10.5	-99	40	80	120
solar	Greece	Europe	Southern Europe	Poliyirou Land Plot 47 solar farm		Αγροτεμαχιο 47		1.4	operating			PV						Enel Green Power Greece SA		40.4677	23.3507	exact		Chalkidiki Regional Unit	Central Macedonia	Macedonia and Thrace	https://gem.wiki/Poliyirou_Land_Plot_47_solar_farm	L822632	G825690	IT0003128367	1	1.4	1.4	-99	40	80	120
solar	Greece	Europe	Southern Europe	Polusitos I solar farm		Πολυσιτος Ι		5.4	operating			PV						Enel Green Power Greece SA		41.0865	25.0176	exact		Xanthi Regional Unit	Eastern Macedonia and Thrace	Macedonia and Thrace	https://gem.wiki/Polusitos_I_solar_farm	L822633	G825691	IT0003128367	1	5.4	5.4	-99	40	80	120
solar	South Africa	Africa	Sub-Saharan Africa	Pulida Solar Park				83	operating	2017		Assumed PV						Enel Green Power SPA		-29.0438	24.9256	exact	Letsemeng Local Municipality	Xhariep District Municipality		Free State	https://gem.wiki/Pulida_Solar_Park	L800266	G800318	IT0003128367	1	83	83	7	2057	2097	2137
solar	Spain	Europe	Southern Europe	Quijote solar farm				42.2	operating	2019		PV						Enel Green Power		38.7824	-6.625	approximate				Extremadura	https://gem.wiki/Quijote_solar_farm	L824820	G828047	IT0003128367	1	42.2	42.2	5	2059	2099	2139
solar	United States	Americas	Northern America	Roadrunner (Enel) solar farm	1			200	operating	2020		PV						Enel Green Power SPA		31.2194	-102.192	exact		Upton County		Texas	https://gem.wiki/Roadrunner_(Enel)_solar_farm	L804452	G805117	IT0003128367	1	400		4	2060	2100	2140
solar	United States	Americas	Northern America	Roadrunner (Enel) solar farm	2			200	operating	2020		PV						Enel Green Power SPA		31.2194	-102.192	exact		Upton County		Texas	https://gem.wiki/Roadrunner_(Enel)_solar_farm	L804452	G805118	IT0003128367	1	400	400	4	2060	2100	2140
solar	Spain	Europe	Southern Europe	Rocinante solar farm				117	pre-construction			PV						Enel Green Power		38.6648	-4.1406	approximate		Campo de Calatrava	Ciudad Real	Castile-La Mancha	https://gem.wiki/Rocinante_solar_farm	L824836	G828066	IT0003128367	1	117	117	-99	40	80	120
solar	Peru	Americas	Latin America and the Caribbean	Rubí 5 solar farm	1	Central Solar Rubí 5		331.7	pre-construction	2025		PV						Enel Green Power SPA		-17.2018	-70.9332	approximate	Moquegua			Moquegua	https://gem.wiki/Rubí_5_solar_farm	L832624	G838211	IT0003128367	1	663.4		-1	2065	2105	2145
solar	Peru	Americas	Latin America and the Caribbean	Rubí 5 solar farm	2	Central Solar Rubí 5		331.7	pre-construction	2026		PV						Enel Green Power SPA		-17.2018	-70.9332	approximate	Moquegua			Moquegua	https://gem.wiki/Rubí_5_solar_farm	L832624	G838212	IT0003128367	1	663.4	663.4	-2	2066	2106	2146
solar	Peru	Americas	Latin America and the Caribbean	Rubí Solar Photovoltaic Plant		Proyecto Solar Rubí		180	operating	2018		PV						Enel Green Power SPA		-17.2582	-71.1934	exact	Moquegua		Moquegua	Moquegua	https://gem.wiki/Rubí_Solar_Photovoltaic_Plant	L807178	G808414	IT0003128367	1	180	180	6	2058	2098	2138
solar	Peru	Americas	Latin America and the Caribbean	Ruta del Sol solar farm		Central Solar Ruta del Sol		307.7	pre-construction	2024		PV						Enel Green Power SPA		-17.2003	-70.9442	approximate	Moquegua			Moquegua	https://gem.wiki/Ruta_del_Sol_solar_farm	L832626	G838214	IT0003128367	1	307.7	307.7	0	2064	2104	2144
solar	Chile	Americas	Latin America and the Caribbean	Samantha Optimization Solar Park		Optimización Parque Solar Samantha		116	shelved			PV						Enel Chile		-33.1078	-70.7798	approximate			Til-Til	Metropolitana	https://gem.wiki/Samantha_Optimization_Solar_Park	L807169	G808403	IT0003128367	1	116	116	-99	40	80	120
solar	Brazil	Americas	Latin America and the Caribbean	São Gonçalo Solar Park	1	Parque Solar São Gonçalo		46	operating	2020		PV						Enel Green Power SPA		-10.0916	-45.2644	exact	São Gonçalo do Gurguéia		Região Geográfica Intermediária de Corrente-Bom Jesus	Piauí	https://gem.wiki/São_Gonçalo_Solar_Park	L807159	G808379	IT0003128367	1	793		4	2060	2100	2140
solar	Brazil	Americas	Latin America and the Caribbean	São Gonçalo Solar Park	10	Parque Solar São Gonçalo		50	operating	2020		PV						Enel Green Power SPA		-10.1129	-45.2915	exact	São Gonçalo do Gurguéia		Região Geográfica Intermediária de Corrente-Bom Jesus	Piauí	https://gem.wiki/São_Gonçalo_Solar_Park	L807159	G808380	IT0003128367	1	793		4	2060	2100	2140
solar	Brazil	Americas	Latin America and the Caribbean	São Gonçalo Solar Park	11	Parque Solar São Gonçalo		35	operating	2020		PV						Enel Green Power SPA		-10.1235	-45.2886	exact	São Gonçalo do Gurguéia		Região Geográfica Intermediária de Corrente-Bom Jesus	Piauí	https://gem.wiki/São_Gonçalo_Solar_Park	L807159	G808381	IT0003128367	1	793		4	2060	2100	2140
solar	Brazil	Americas	Latin America and the Caribbean	São Gonçalo Solar Park	12	Parque Solar São Gonçalo		35	operating	2020		PV						Enel Green Power SPA		-10.1203	-45.2846	exact	São Gonçalo do Gurguéia		Região Geográfica Intermediária de Corrente-Bom Jesus	Piauí	https://gem.wiki/São_Gonçalo_Solar_Park	L807159	G808382	IT0003128367	1	793		4	2060	2100	2140
solar	Brazil	Americas	Latin America and the Caribbean	São Gonçalo Solar Park	2	Parque Solar São Gonçalo		50	operating	2020		PV						Enel Green Power SPA		-10.0965	-45.2744	exact	São Gonçalo do Gurguéia		Região Geográfica Intermediária de Corrente-Bom Jesus	Piauí	https://gem.wiki/São_Gonçalo_Solar_Park	L807159	G808383	IT0003128367	1	793		4	2060	2100	2140
solar	Brazil	Americas	Latin America and the Caribbean	São Gonçalo Solar Park	21	Parque Solar São Gonçalo		50	operating	2020		PV						Enel Green Power SPA		-10.1058	-45.2788	exact	São Gonçalo do Gurguéia		Região Geográfica Intermediária de Corrente-Bom Jesus	Piauí	https://gem.wiki/São_Gonçalo_Solar_Park	L807159	G808384	IT0003128367	1	793		4	2060	2100	2140
solar	Brazil	Americas	Latin America and the Caribbean	São Gonçalo Solar Park	22	Parque Solar São Gonçalo		50	operating	2020		PV						Enel Green Power SPA		-10.0979	-45.263	exact	São Gonçalo do Gurguéia		Região Geográfica Intermediária de Corrente-Bom Jesus	Piauí	https://gem.wiki/São_Gonçalo_Solar_Park	L807159	G808385	IT0003128367	1	793		4	2060	2100	2140
solar	Brazil	Americas	Latin America and the Caribbean	São Gonçalo Solar Park	3	Parque Solar São Gonçalo		46	operating	2020		PV						Enel Green Power SPA		-10.0991	-45.2815	exact	São Gonçalo do Gurguéia		Região Geográfica Intermediária de Corrente-Bom Jesus	Piauí	https://gem.wiki/São_Gonçalo_Solar_Park	L807159	G808386	IT0003128367	1	793		4	2060	2100	2140
solar	Brazil	Americas	Latin America and the Caribbean	São Gonçalo Solar Park	4	Parque Solar São Gonçalo		50	operating	2020		PV						Enel Green Power SPA		-10.1205	-45.2969	exact	São Gonçalo do Gurguéia		Região Geográfica Intermediária de Corrente-Bom Jesus	Piauí	https://gem.wiki/São_Gonçalo_Solar_Park	L807159	G808387	IT0003128367	1	793		4	2060	2100	2140
solar	Brazil	Americas	Latin America and the Caribbean	São Gonçalo Solar Park	5	Parque Solar São Gonçalo		50	operating	2020		PV						Enel Green Power SPA		-10.1077	-45.2997	exact	São Gonçalo do Gurguéia		Região Geográfica Intermediária de Corrente-Bom Jesus	Piauí	https://gem.wiki/São_Gonçalo_Solar_Park	L807159	G808388	IT0003128367	1	793		4	2060	2100	2140
solar	Brazil	Americas	Latin America and the Caribbean	São Gonçalo Solar Park	6	Parque Solar São Gonçalo		46	operating	2020		PV						Enel Green Power SPA		-10.1146	-45.3006	exact	São Gonçalo do Gurguéia		Região Geográfica Intermediária de Corrente-Bom Jesus	Piauí	https://gem.wiki/São_Gonçalo_Solar_Park	L807159	G808389	IT0003128367	1	793		4	2060	2100	2140
solar	Brazil	Americas	Latin America and the Caribbean	São Gonçalo Solar Park	7	Parque Solar São Gonçalo		35	operating	2020		PV						Enel Green Power SPA		-10.1284	-45.2986	exact	São Gonçalo do Gurguéia		Região Geográfica Intermediária de Corrente-Bom Jesus	Piauí	https://gem.wiki/São_Gonçalo_Solar_Park	L807159	G808390	IT0003128367	1	793		4	2060	2100	2140
solar	Brazil	Americas	Latin America and the Caribbean	São Gonçalo Solar Park	8	Parque Solar São Gonçalo		35	operating	2020		PV						Enel Green Power SPA		-10.1234	-45.2931	exact	São Gonçalo do Gurguéia		Região Geográfica Intermediária de Corrente-Bom Jesus	Piauí	https://gem.wiki/São_Gonçalo_Solar_Park	L807159	G808391	IT0003128367	1	793		4	2060	2100	2140
solar	Brazil	Americas	Latin America and the Caribbean	São Gonçalo Solar Park	14	Parque Solar São Gonçalo		43	operating	2022		PV						Enel Green Power SPA		-10.1109	-45.2792	exact	São Gonçalo do Gurguéia		Região Geográfica Intermediária de Corrente-Bom Jesus	Piauí	https://gem.wiki/São_Gonçalo_Solar_Park	L807159	G808374	IT0003128367	1	793		2	2062	2102	2142
solar	Brazil	Americas	Latin America and the Caribbean	São Gonçalo Solar Park	15	Parque Solar São Gonçalo		43	operating	2022		PV						Enel Green Power SPA		-10.1117	-45.2659	exact	São Gonçalo do Gurguéia		Região Geográfica Intermediária de Corrente-Bom Jesus	Piauí	https://gem.wiki/São_Gonçalo_Solar_Park	L807159	G808375	IT0003128367	1	793		2	2062	2102	2142
solar	Brazil	Americas	Latin America and the Caribbean	São Gonçalo Solar Park	17	Parque Solar São Gonçalo		43	operating	2022		PV						Enel Green Power SPA		-10.1161	-45.2738	exact	São Gonçalo do Gurguéia		Região Geográfica Intermediária de Corrente-Bom Jesus	Piauí	https://gem.wiki/São_Gonçalo_Solar_Park	L807159	G808376	IT0003128367	1	793		2	2062	2102	2142
solar	Brazil	Americas	Latin America and the Caribbean	São Gonçalo Solar Park	18	Parque Solar São Gonçalo		43	operating	2022		PV						Enel Green Power SPA		-10.107	-45.2701	exact	São Gonçalo do Gurguéia		Região Geográfica Intermediária de Corrente-Bom Jesus	Piauí	https://gem.wiki/São_Gonçalo_Solar_Park	L807159	G808377	IT0003128367	1	793		2	2062	2102	2142
solar	Brazil	Americas	Latin America and the Caribbean	São Gonçalo Solar Park	19	Parque Solar São Gonçalo		43	operating	2022		PV						Enel Green Power SPA		-10.119	-45.281	exact	São Gonçalo do Gurguéia		Região Geográfica Intermediária de Corrente-Bom Jesus	Piauí	https://gem.wiki/São_Gonçalo_Solar_Park	L807159	G808378	IT0003128367	1	793	793	2	2062	2102	2142
solar	Spain	Europe	Southern Europe	Sedéis solar farm	5			49.7	construction			PV						Enel Green Power		40.9951	-0.3872	exact		Andorra-Sierra de Arcos		Aragon	https://gem.wiki/Sedéis_solar_farm	L824857	G828097	IT0003128367	1	49.7	49.7	-99	40	80	120
solar	Chile	Americas	Latin America and the Caribbean	Sierra Gorda solar farm		Planta Fotovoltaica Sierra Gorda Solar		400	construction	2024		PV						Enel Chile		-23.6217	-70.3776	approximate	Antofagasta	Provincia de Antofagasta		Antofagasta Region	https://gem.wiki/Sierra_Gorda_solar_farm	L832281	G837828	IT0003128367	1	400	400	0	2064	2104	2144
solar	Chile	Americas	Latin America and the Caribbean	Sol De Lila Photovoltaic Solar Project		Proyecto Solar Fotovoltaico Sol de Lila		163	operating	2021		PV						Enel Chile		-33.4665	-70.673	approximate				Antofagasta	https://gem.wiki/Sol_De_Lila_Photovoltaic_Solar_Project	L807170	G808404	IT0003128367	1	163	163	3	2061	2101	2141
solar	Greece	Europe	Southern Europe	Sounio solar farm		Σουνιο		1.6	operating			PV						Enel Green Power Greece SA		41.1144	25.0492	exact		Xanthi Regional Unit	Eastern Macedonia and Thrace	Macedonia and Thrace	https://gem.wiki/Sounio_solar_farm	L822672	G825731	IT0003128367	1	1.6	1.6	-99	40	80	120
solar	United States	Americas	Northern America	Stillwater Facility solar farm	1			22	operating	2012		PV						Enel Green Power SPA		39.5475	-118.556	exact		Churchill County		Nevada	https://gem.wiki/Stillwater_Facility_solar_farm	L804447	G805119	IT0003128367	1	42		12	2052	2092	2132
solar	United States	Americas	Northern America	Stillwater Facility solar farm	2		Wynn Solar Facility, EGP Stillwater Solar PV 2	20	operating	2018		PV						Enel Green Power SPA		39.542	-118.56	exact		Churchill County		Nevada	https://gem.wiki/Stillwater_Facility_solar_farm	L804447	G805112	IT0003128367	1	42	42	6	2058	2098	2138
solar	Peru	Americas	Latin America and the Caribbean	Sumac Nina 1 solar farm		Central Solar Sumac Nina 1		446.8	pre-construction	2025		PV						Enel Green Power SPA		-16.4318	-73.1032	approximate				Arequipa	https://gem.wiki/Sumac_Nina_1_solar_farm	L832632	G838220	IT0003128367	1	446.8	446.8	-1	2065	2105	2145
solar	Peru	Americas	Latin America and the Caribbean	Sunilo Solar farm		Parque Solar Sunilo		120	operating	2023		PV						Enel Green Power SPA		-17.6212	-71.2699	approximate				Moquegua	https://gem.wiki/Sunilo_Solar_farm	L808308	G810481	IT0003128367	1	120	120	1	2063	2103	2143
solar	Chile	Americas	Latin America and the Caribbean	Taltal PV Solar Project		Proyecto Solar Taltal		317	pre-construction	2023		PV						Enel Chile		-25.3953	-69.8573	approximate			Taltal	Antofagasta	https://gem.wiki/Taltal_PV_Solar_Project	L807171	G808405	IT0003128367	1	317	317	1	2063	2103	2143
solar	India	Asia	Southern Asia	Thar solar farm			Thar Surya-1	420	operating	2022		PV						Enel Green Power SPA; KLP		28.0198	73.2539	exact	Bikaner	Bikaner Tehsil	Bikaner	Rajasthan	https://gem.wiki/Thar_solar_farm	L808951	G811257	IT0003128367	0.5	420	420	2	2062	2102	2142
solar	South Africa	Africa	Sub-Saharan Africa	Tom Burke Solar Park				66	operating	2016		Assumed PV						Enel Green Power SPA		-23.0716	27.9853	exact	Lephalale Local Municipality	Waterberg District Municipality		Limpopo	https://gem.wiki/Tom_Burke_Solar_Park	L800330	G800401	IT0003128367	1	66	66	8	2056	2096	2136
solar	Italy	Europe	Southern Europe	Trino Solar				60	operating			PV						Enel Green Power SPA		45.0607	7.9235	approximate				Piedmont	https://gem.wiki/Trino_Solar	L805790	G806664	IT0003128367	1	60	60	-99	40	80	120
solar	United States	Americas	Northern America	TWE Bowman Solar Project			Bowman Tradewind Solar Farm	75	operating	2020		PV						Enel Green Power SPA		33.3162	-80.6824	exact		Orangeburg County		South Carolina	https://gem.wiki/TWE_Bowman_Solar_Project	L805044	G805815	IT0003128367	1	75	75	4	2060	2100	2140
solar	Chile	Americas	Latin America and the Caribbean	Valle del Sol solar farm		Parque Solar Valle del Sol		160	operating	2023		PV						Enel Chile		-22.3465	-69.6775	approximate		Provincia de Tocopilla		Antofagasta Region	https://gem.wiki/Valle_del_Sol_solar_farm	L808010	G810112	IT0003128367	1	160	160	1	2063	2103	2143
solar	Spain	Europe	Southern Europe	Villameca (Enel) solar farm				196	pre-construction			PV						Enel Green Power		42.6402	-6.074	approximate			León	Castile and León	https://gem.wiki/Villameca_(Enel)_solar_farm	L824944	G828205	IT0003128367	1	196	196	-99	40	80	120
solar	Mexico	Americas	Latin America and the Caribbean	Villanueva solar farm	Expansion	Planta Solar Villanueva (Exp)		150	pre-construction			PV						Enel Green Power		25.5607	-103.05	approximate				Coahuila	https://gem.wiki/Villanueva_solar_farm	L832594	G838171	IT0003128367	1	150	150	-99	40	80	120
solar	Greece	Europe	Southern Europe	Voreios Platanos solar farm		Βορειος Πλατανος	North Platanos	83.8	pre-construction			PV						Enel Green Power Greece SA		39.2359	22.5303	exact		Larisa Regional Unit	Thessaly	Thessaly and Central Greece	https://gem.wiki/Voreios_Platanos_solar_farm	L806285	G807220	IT0003128367	1	83.8	83.8	-99	40	80	120
solar	Spain	Europe	Southern Europe	Zurbarán (Enel) solar farm				42.9	operating	2019		PV						Enel Green Power		39.0656	-5.7224	approximate			Badajoz	Extremadura	https://gem.wiki/Zurbarán_(Enel)_solar_farm	L824973	G828246	IT0003128367	1	42.9	42.9	5	2059	2099	2139
wind	United States	Americas	Northern America	25 Mile Creek wind farm	1			250	operating	2022		onshore						Enel Green Power		36.4768	-99.7885	exact		Ellis County		Oklahoma	https://gem.wiki/25_Mile_Creek_wind_farm	L907500	G910126	IT0003128367	1	250	250	2	2062	2102	2142
wind	Spain	Europe	Southern Europe	A Capelada wind farm	1			17	operating	1997		onshore						Enel Green Power España		43.7171	-7.9369	exact		Ferrol		Galicia	https://gem.wiki/A_Capelada_wind_farm	L910145	G913673	IT0003128367	1	32		27	2037	2077	2117
wind	Spain	Europe	Southern Europe	A Capelada wind farm	2			15	operating	1998		onshore						Enel Green Power España		43.6867	-7.9596	exact		Ferrol		Galicia	https://gem.wiki/A_Capelada_wind_farm	L910145	G912970	IT0003128367	1	32	32	26	2038	2078	2118
wind	Morocco	Africa	Northern Africa	Aferkat wind farm		مزرعة الطاقة الريحية "أفركات" , Projet De Parc Aferkat	Aferkat 80MW park project	80	pre-construction	2023		onshore						Enel Green Power		31.1728	-7.3362	approximate				Guilmim-Oued Noun	https://gem.wiki/Aferkat_wind_farm	L900023	G900025	IT0003128367	1	80	80	1	2063	2103	2143
wind	Romania	Europe	Eastern Europe	Agighiohl Valea Nucarilor wind farm	1		Cee Valea Nucarilor 3	35	operating	2010		onshore						Enel Green Power Romania SRL		45.0397	28.9435	approximate	Valea Nucarilor	Tulcea		Dobruja	https://gem.wiki/Agighiohl_Valea_Nucarilor_wind_farm	L913766	G917107	IT0003128367	1	35	35	14	2050	2090	2130
wind	Spain	Europe	Southern Europe	Ágreda wind farm				18	operating	2013		onshore						Enel Green Power España		41.8559	-1.9224	exact			Soria	Castile and León	https://gem.wiki/Ágreda_wind_farm	L910977	G913898	IT0003128367	1	18	18	11	2053	2093	2133
wind	Spain	Europe	Southern Europe	Aldeavieja wind farm				15	operating			onshore						Enel Green Power España		40.7201	-4.4701	exact	Santa María del Cubillo		Ávila	Castile and León	https://gem.wiki/Aldeavieja_wind_farm	L910150	G912976	IT0003128367	1	15	15	-99	40	80	120
wind	Spain	Europe	Southern Europe	Alfajarín wind farm				25	pre-construction			onshore						Enel Green Power España		41.681	-0.5072	approximate	Farlete			Aragón	https://gem.wiki/Alfajarín_wind_farm	L912582	G915712	IT0003128367	1	25		-99	40	80	120
wind	Spain	Europe	Southern Europe	Allueva wind farm				25	operating	2019		onshore						Enel Green Power España		40.996	-1.039	exact	Allueva	Jiloca		Aragon	https://gem.wiki/Allueva_wind_farm	L912583	G915713	IT0003128367	1	25	25	5	2059	2099	2139
wind	Spain	Europe	Southern Europe	Almaren wind farm				12	operating	2008		onshore						Enel Green Power España		41.451	-1.613	exact		Comunidad de Calatayud		Aragon	https://gem.wiki/Almaren_wind_farm	L908714	G911427	IT0003128367	1	12	12	16	2048	2088	2128
wind	United States	Americas	Northern America	Alta Farms II Wind Project	2			200	construction	2023		onshore						Enel Green Power		40.1914	-89.0575	exact	Clinton	DeWitt County		Illinois	https://gem.wiki/Alta_Farms_II_Wind_Project	L907410	G909982	IT0003128367	1	200	200	1	2063	2103	2143
wind	Spain	Europe	Southern Europe	Alto Cabrera wind farm				114	shelved			onshore						Enel Green Power España		42.5892	-5.5633	approximate	Carballeda de Valdeorras			Castilla y León	https://gem.wiki/Alto_Cabrera_wind_farm	L915765	G919488	IT0003128367	1	114	114	-99	40	80	120
wind	Spain	Europe	Southern Europe	Alto Casillas wind farm	1		Casillas	30	operating	2008		onshore						Enel Green Power España		39.9991	-0.6267	exact		Castelló / Castellón		Valencian Community	https://gem.wiki/Alto_Casillas_wind_farm	L913210	G916443	IT0003128367	1	60		16	2048	2088	2128
wind	Spain	Europe	Southern Europe	Alto Casillas wind farm	2		Casillas	30	operating	2008		onshore						Enel Green Power España		39.9991	-0.6267	exact		Castelló / Castellón		Valencian Community	https://gem.wiki/Alto_Casillas_wind_farm	L913210	G916444	IT0003128367	1	60	60	16	2048	2088	2128
wind	Spain	Europe	Southern Europe	Altos De Cartagena wind farm				21	operating	2002		onshore						Enel Green Power España		40.6301	-4.3401	exact			Ávila	Castile and León	https://gem.wiki/Altos_De_Cartagena_wind_farm	L911807	G914830	IT0003128367	1	21	21	22	2042	2082	2122
wind	Portugal	Europe	Southern Europe	Alvaiázere wind farm	1		Parque Eólico Alvaiázere	18	operating	2011		onshore						Enel Green Power SPA		39.8289	-8.4128	exact	Alvaiázere	Leiria			https://gem.wiki/Alvaiázere_wind_farm	L910981	G913903	IT0003128367	1	18	18	13	2051	2091	2131
wind	Mexico	Americas	Latin America and the Caribbean	Amistad wind farm	1	Parque Eólico Amistad		200	operating			onshore						Enel Green Power SPA		29.6288	-101.666	exact	Acuna			Coahuila	https://gem.wiki/Amistad_wind_farm	L905219	G906845	IT0003128367	1	549		-99	40	80	120
wind	Mexico	Americas	Latin America and the Caribbean	Amistad wind farm	2	Parque Eólico Amistad		100	construction			onshore						Enel Green Power SPA		29.3777	-101.065	exact	Acuna			Coahuila	https://gem.wiki/Amistad_wind_farm	L905219	G906846	IT0003128367	1	549		-99	40	80	120
wind	Mexico	Americas	Latin America and the Caribbean	Amistad wind farm	3	Parque Eólico Amistad		100	pre-construction			onshore						Enel Green Power SPA		29.5986	-101.666	approximate	Acuna			Coahuila	https://gem.wiki/Amistad_wind_farm	L905219	G906847	IT0003128367	1	549		-99	40	80	120
wind	Mexico	Americas	Latin America and the Caribbean	Amistad wind farm	4	Parque Eólico Amistad		149	pre-construction			onshore						Enel Green Power SPA		29.5986	-101.666	approximate	Acuna			Coahuila	https://gem.wiki/Amistad_wind_farm	L905219	G906848	IT0003128367	1	549	549	-99	40	80	120
wind	Greece	Europe	Southern Europe	Anatole wind farm		Ανατολη	Kafireas	16	operating	2019		onshore						Enel Green Power Greece SA		38.1191	24.5406	exact		Euboea Regional Unit	Central Greece	Thessaly and Central Greece	https://gem.wiki/Anatole_wind_farm	L910689	G913579	IT0003128367	1	16	16	5	2059	2099	2139
wind	United States	Americas	Northern America	Aquilla Wind	1			300	pre-construction			onshore						Enel Green Power		32.0129	-97.1901	approximate				Texas	https://gem.wiki/Aquilla_Wind	L921919	G927230	IT0003128367	1	300	300	-99	40	80	120
wind	Brazil	Americas	Latin America and the Caribbean	Aroeira wind farm	1	Complexo Eólico Aroeira		47	construction	2024		onshore						Enel Green Power Brasil Participações LTDA		-12.5779	-38.0049	approximate	Morro do Chapéu			Bahia	https://gem.wiki/Aroeira_wind_farm	L905282	G906983	IT0003128367	1	447		0	2064	2104	2144
wind	Brazil	Americas	Latin America and the Caribbean	Aroeira wind farm	2	Complexo Eólico Aroeira		43	construction	2024		onshore						Enel Green Power Brasil Participações LTDA		-12.5779	-38.0049	approximate	Morro do Chapéu			Bahia	https://gem.wiki/Aroeira_wind_farm	L905282	G906984	IT0003128367	1	447		0	2064	2104	2144
wind	Brazil	Americas	Latin America and the Caribbean	Aroeira wind farm	3	Complexo Eólico Aroeira		43	construction	2024		onshore						Enel Green Power Brasil Participações LTDA		-12.5779	-38.0049	approximate	Morro do Chapéu			Bahia	https://gem.wiki/Aroeira_wind_farm	L905282	G906985	IT0003128367	1	447		0	2064	2104	2144
wind	Brazil	Americas	Latin America and the Caribbean	Aroeira wind farm	4	Complexo Eólico Aroeira		43	construction	2024		onshore						Enel Green Power Brasil Participações LTDA		-12.5779	-38.0049	approximate	Morro do Chapéu			Bahia	https://gem.wiki/Aroeira_wind_farm	L905282	G906986	IT0003128367	1	447		0	2064	2104	2144
wind	Brazil	Americas	Latin America and the Caribbean	Aroeira wind farm	5	Complexo Eólico Aroeira		43	construction	2024		onshore						Enel Green Power Brasil Participações LTDA		-12.5779	-38.0049	approximate	Morro do Chapéu			Bahia	https://gem.wiki/Aroeira_wind_farm	L905282	G906987	IT0003128367	1	447		0	2064	2104	2144
wind	Brazil	Americas	Latin America and the Caribbean	Aroeira wind farm	6	Complexo Eólico Aroeira		39	construction	2024		onshore						Enel Green Power Brasil Participações LTDA		-12.5779	-38.0049	approximate	Morro do Chapéu			Bahia	https://gem.wiki/Aroeira_wind_farm	L905282	G906988	IT0003128367	1	447		0	2064	2104	2144
wind	Brazil	Americas	Latin America and the Caribbean	Aroeira wind farm	7	Complexo Eólico Aroeira		47	construction	2024		onshore						Enel Green Power Brasil Participações LTDA		-12.5779	-38.0049	approximate	Morro do Chapéu			Bahia	https://gem.wiki/Aroeira_wind_farm	L905282	G906989	IT0003128367	1	447		0	2064	2104	2144
wind	Brazil	Americas	Latin America and the Caribbean	Aroeira wind farm	8	Complexo Eólico Aroeira		43	construction	2024		onshore						Enel Green Power Brasil Participações LTDA		-12.5779	-38.0049	approximate	Morro do Chapéu			Bahia	https://gem.wiki/Aroeira_wind_farm	L905282	G906990	IT0003128367	1	447		0	2064	2104	2144
wind	Brazil	Americas	Latin America and the Caribbean	Aroeira wind farm	9	Complexo Eólico Aroeira		47	pre-construction	2024		onshore						Enel Green Power Brasil Participações LTDA		-12.5779	-38.0049	approximate	Morro do Chapéu			Bahia	https://gem.wiki/Aroeira_wind_farm	L905282	G906991	IT0003128367	1	447		0	2064	2104	2144
wind	Brazil	Americas	Latin America and the Caribbean	Aroeira wind farm	10	Complexo Eólico Aroeira		26	pre-construction	2024		onshore						Enel Green Power Brasil Participações LTDA		-12.5779	-38.0049	approximate	Morro do Chapéu			Bahia	https://gem.wiki/Aroeira_wind_farm	L905282	G906992	IT0003128367	1	447		0	2064	2104	2144
wind	Brazil	Americas	Latin America and the Caribbean	Aroeira wind farm	11	Complexo Eólico Aroeira		26	pre-construction	2024		onshore						Enel Green Power Brasil Participações LTDA		-12.5779	-38.0049	approximate	Morro do Chapéu			Bahia	https://gem.wiki/Aroeira_wind_farm	L905282	G906993	IT0003128367	1	447	447	0	2064	2104	2144
wind	Greece	Europe	Southern Europe	Aspre Petra wind farm		Ασπρη Πετρα	Aspri Petra	20	operating	2003		onshore						Enel Green Power Greece SA		41.1628	25.8683	exact		Rodopi Regional Unit	Eastern Macedonia and Thrace	Macedonia and Thrace	https://gem.wiki/Aspre_Petra_wind_farm	L911444	G914424	IT0003128367	1	20	20	21	2043	2083	2123
wind	United States	Americas	Northern America	Aurora Wind Project	1			299	operating	2021		onshore						Enel Green Power		48.5127	-103.094	exact	Tioga	Williams County		North Dakota	https://gem.wiki/Aurora_Wind_Project	L907555	G910189	IT0003128367	1	299	299	3	2061	2101	2141
wind	Russia	Europe	Eastern Europe	Azov wind farm	1	Азовская ВЭС	Azovskaya	90	operating	2021		onshore						Enel Russia		46.9446	38.8756	exact		Azovsky District		Rostov Oblast	https://gem.wiki/Azov_wind_farm	L905610	G907700	IT0003128367	1	90	90	3	2061	2101	2141
wind	United States	Americas	Northern America	Azure Sky Wind Project	1			350	operating	2023		onshore						Enel Green Power		33.1855	-99.2359	exact		Throckmorton County		Texas	https://gem.wiki/Azure_Sky_Wind_Project	L907624	G910267	IT0003128367	1	350	350	1	2063	2103	2143
wind	Spain	Europe	Southern Europe	Barbanza wind farm	1			29	operating	1997		onshore						Enel Green Power España		42.6687	-8.9619	exact		Noia		Galicia	https://gem.wiki/Barbanza_wind_farm	L913114	G916331	IT0003128367	1	29	29	27	2037	2077	2117
wind	Mexico	Americas	Latin America and the Caribbean	Bii Nee Stipa wind farm	2	Parque Eólico Bii Nee Stipa	Stipa Nayaá	74	operating	2012		onshore						Enel Green Power SPA		16.5106	-94.9689	exact	Juchitán	Heroica Ciudad de Juchitán de Zaragoza		Oaxaca	https://gem.wiki/Bii_Nee_Stipa_wind_farm	L905220	G906849	IT0003128367	1	144		12	2052	2092	2132
wind	Mexico	Americas	Latin America and the Caribbean	Bii Nee Stipa wind farm	3	Parque Eólico Bii Nee Stipa	Stipa Nayaá, Zopiloapan	70	operating	2012		onshore						Enel Green Power SPA		16.5106	-94.9689	exact	Juchitán	Heroica Ciudad de Juchitán de Zaragoza		Oaxaca	https://gem.wiki/Bii_Nee_Stipa_wind_farm	L905220	G906850	IT0003128367	1	144	144	12	2052	2092	2132
wind	United States	Americas	Northern America	Bijou Hills Wind Project	1			400	pre-construction			onshore						Enel Green Power		39.2978	-103.725	approximate	Limon	Elbert County		Colorado	https://gem.wiki/Bijou_Hills_Wind_Project	L907638	G910286	IT0003128367	1	400	400	-99	40	80	120
wind	United States	Americas	Northern America	Bison Meadows Wind And Storage Project	1			200	pre-construction	2026		onshore						Enel Green Power		41.7142	-89.3287	approximate	Amboy	Lee County		Illinois	https://gem.wiki/Bison_Meadows_Wind_And_Storage_Project	L907358	G909910	IT0003128367	1	200	200	-2	2066	2106	2146
wind	United States	Americas	Northern America	Buffalo Dunes wind farm	1			250	operating	2013		onshore						Enel Green Power		37.644	-101.102	exact		Grant County		Kansas	https://gem.wiki/Buffalo_Dunes_wind_farm	L907497	G910123	IT0003128367	1	250	250	11	2053	2093	2133
wind	Spain	Europe	Southern Europe	Caldereros wind farm				38	operating	2008		onshore						Enel Green Power España		40.807	-1.5835	exact			Guadalajara	Castile-La Mancha	https://gem.wiki/Caldereros_wind_farm	L914049	G917427	IT0003128367	1	38	38	16	2048	2088	2128
wind	Spain	Europe	Southern Europe	Campillo De Altobuey wind farm	2		Campillo Wind	91.2	operating	2022		onshore						Enel Green Power		39.643	-1.7426	exact					https://gem.wiki/Campillo_De_Altobuey_wind_farm	L915486	G925550	IT0003128367	1	182.4		2	2062	2102	2142
wind	Spain	Europe	Southern Europe	Campillo De Altobuey wind farm	3		Campillo Wind	91.2	operating	2022		onshore						Enel Green Power		39.6374	-1.6991	approximate					https://gem.wiki/Campillo_De_Altobuey_wind_farm	L915486	G925551	IT0003128367	1	182.4	182.4	2	2062	2102	2142
wind	Spain	Europe	Southern Europe	Campoliva wind farm	1			36	operating	2019		onshore						Enel Green Power España		41.6801	-0.697	exact	Villamayor de Gállego	Zaragoza		Aragon	https://gem.wiki/Campoliva_wind_farm	L913860	G917213	IT0003128367	1	75		5	2059	2099	2139
wind	Spain	Europe	Southern Europe	Campoliva wind farm	2			39	operating	2019		onshore						Enel Green Power España		41.679	-0.661	exact	Villamayor de Gállego	Zaragoza		Aragon	https://gem.wiki/Campoliva_wind_farm	L913860	G917512	IT0003128367	1	75	75	5	2059	2099	2139
wind	Spain	Europe	Southern Europe	Cañaseca wind farm				18	operating	2020		onshore						Enel Green Power España		41.3787	-0.7639	approximate	Blesa		Zaragosa	Aragón	https://gem.wiki/Cañaseca_wind_farm	L911006	G913929	IT0003128367	1	18	18	4	2060	2100	2140
wind	Chile	Americas	Latin America and the Caribbean	Canela wind farm	1	Parque Eólico Canela		18	operating	2007		onshore						Enel Green Power SPA		-31.2868	-71.6153	exact	Canela	Provincia de Choapa	Choapa	Coquimbo Region	https://gem.wiki/Canela_wind_farm	L905210	G906835	IT0003128367	1	78		17	2047	2087	2127
wind	Chile	Americas	Latin America and the Caribbean	Canela wind farm	2	Parque Eólico Canela		60	operating	2009		onshore						Enel Green Power SPA		-31.2866	-71.6153	exact	Canela	Provincia de Choapa	Choapa	Coquimbo Region	https://gem.wiki/Canela_wind_farm	L905210	G906834	IT0003128367	1	78	78	15	2049	2089	2129
wind	United States	Americas	Northern America	Caney River wind farm	1			200	operating	2011		onshore						Enel Green Power		37.4333	-96.4169	exact		Elk County		Kansas	https://gem.wiki/Caney_River_wind_farm	L907348	G909900	IT0003128367	1	200	200	13	2051	2091	2131
wind	Spain	Europe	Southern Europe	Cantiruela wind farm				15	operating	2008		onshore						Enel Green Power España		42.7201	-3.7501	approximate	Valle de Sedano		Burgos	Castilla y León	https://gem.wiki/Cantiruela_wind_farm	L910184	G913013	IT0003128367	1	15	15	16	2048	2088	2128
wind	Spain	Europe	Southern Europe	Careón wind farm				18	operating	2000		onshore						Enel Green Power España		42.9115	-7.9383	exact		A Ulloa		Galicia	https://gem.wiki/Careón_wind_farm	L911009	G913933	IT0003128367	1	18	18	24	2040	2080	2120
wind	Spain	Europe	Southern Europe	Cascante wind farm	2		Vientos del Cierzo	38	pre-construction			onshore						Enel Green Power España		42.3337	-1.7942	approximate	Cascante	La Ribera		Navarra	https://gem.wiki/Cascante_wind_farm	L914055	G917433	IT0003128367	1	38	38	-99	40	80	120
wind	Spain	Europe	Southern Europe	Castelo wind farm				17	operating	2001		onshore						Enel Green Power España		43.0901	-8.6901	exact		O Xallas		Galicia	https://gem.wiki/Castelo_wind_farm	L910797	G913694	IT0003128367	1	17	17	23	2041	2081	2121
wind	Colombia	Americas	Latin America and the Caribbean	Castilletes wind farm		Parque Eólico Castilletes		100	cancelled			onshore						Enel Green Power SPA		11.9917	-71.6769	approximate	Uribia			La Guajira	https://gem.wiki/Castilletes_wind_farm	L905182	G906745	IT0003128367	1	100	100	-99	40	80	120
wind	Canada	Americas	Northern America	Castle Rock Ridge wind farm	1			76	operating	2012		onshore						Enel Green Power SPA		49.5811	-114	exact		Municipal District of Pincher Creek No. 9		Alberta	https://gem.wiki/Castle_Rock_Ridge_wind_farm	L906534	G909205	IT0003128367	1	105		12	2052	2092	2132
wind	Canada	Americas	Northern America	Castle Rock Ridge wind farm	2			29	operating	2020		onshore						Enel Green Power SPA		49.5287	-113.796	exact		Municipal District of Pincher Creek No. 9		Alberta	https://gem.wiki/Castle_Rock_Ridge_wind_farm	L906534	G908823	IT0003128367	1	105	105	4	2060	2100	2140
wind	United States	Americas	Northern America	Cedar Run Wind Project	1			150	pre-construction			onshore						Enel Green Power		35.6961	-96.8898	approximate		Lincoln County		Oklahoma	https://gem.wiki/Cedar_Run_Wind_Project	L907200	G909705	IT0003128367	1	150	150	-99	40	80	120
wind	Spain	Europe	Southern Europe	Chan Do Tenón wind farm				22	operating	2007		onshore						Enel Green Power España		43.6094	-7.6747	exact		A Mariña Occidental		Galicia	https://gem.wiki/Chan_Do_Tenón_wind_farm	L912038	G915093	IT0003128367	1	22	22	17	2047	2087	2127
wind	Colombia	Americas	Latin America and the Caribbean	Chemesky wind farm		Parque Eólico Chemesky	Urraichi Chemesky	112	pre-construction	2024		onshore						Enel Green Power SPA		11.9917	-71.6769	approximate	Uribia			La Guajira	https://gem.wiki/Chemesky_wind_farm	L905183	G906746	IT0003128367	1	112	112	0	2064	2104	2144
wind	United States	Americas	Northern America	CHI Wind	1		CHI Energy Wind Farms	30	operating	2000		onshore						Enel Green Power		43.9801	-96.0107	exact		Murray County		Minnesota	https://gem.wiki/CHI_Wind	L917209	G921353	IT0003128367	1	30	30	24	2040	2080	2120
wind	United States	Americas	Northern America	Chisholm View wind farm	1			235	operating	2012		onshore						Enel Green Power		36.5851	-97.7678	exact		Garfield County		Oklahoma	https://gem.wiki/Chisholm_View_wind_farm	L906775	G910098	IT0003128367	1	300		12	2052	2092	2132
wind	United States	Americas	Northern America	Chisholm View wind farm	2			65	operating	2016		onshore						Enel Green Power		36.5255	-97.6952	exact		Garfield County		Oklahoma	https://gem.wiki/Chisholm_View_wind_farm	L906775	G909121	IT0003128367	1	300	300	8	2056	2096	2136
wind	Greece	Europe	Southern Europe	Chlogos wind farm		Χλογος		19	operating	2012		onshore						Enel Green Power Greece SA		37.7608	22.8552	exact	Municipal Unit of Tenea	Corinthia Regional Unit	Peloponnese Region	Peloponnese, Western Greece and the Ionian	https://gem.wiki/Chlogos_wind_farm	L911347	G914314	IT0003128367	1	19	19	12	2052	2092	2132
wind	United States	Americas	Northern America	Cimarron Bend wind farm	1			200	operating	2016		onshore						Enel Green Power		37.3767	-99.9265	exact		Clark County		Kansas	https://gem.wiki/Cimarron_Bend_wind_farm	L907339	G909918	IT0003128367	1	599		8	2056	2096	2136
wind	United States	Americas	Northern America	Cimarron Bend wind farm	2			200	operating	2017		onshore						Enel Green Power		37.3771	-99.9468	exact		Clark County		Kansas	https://gem.wiki/Cimarron_Bend_wind_farm	L907339	G909919	IT0003128367	1	599		7	2057	2097	2137
wind	United States	Americas	Northern America	Cimarron Bend wind farm	3			199	operating	2020		onshore						Enel Green Power		37.4144	-100.044	exact		Clark County		Kansas	https://gem.wiki/Cimarron_Bend_wind_farm	L907339	G909885	IT0003128367	1	599	599	4	2060	2100	2140
wind	Spain	Europe	Southern Europe	Cobertran wind farm				50	pre-construction			onshore						Enel Green Power España		41.525	1.0891	approximate	Vallbona de les Monges	Urgell		Cataluña	https://gem.wiki/Cobertran_wind_farm	L914892	G918436	IT0003128367	1	50		-99	40	80	120
wind	Spain	Europe	Southern Europe	Cogollos wind farm	2			50	operating	2011		onshore						Enel Green Power España		42.2007	-3.6994	approximate	Cogollos		Burgos	Castilla y León	https://gem.wiki/Cogollos_wind_farm	L914894	G918438	IT0003128367	1	50		13	2051	2091	2131
wind	Spain	Europe	Southern Europe	Coll De Traginers wind farm				50	pre-construction			onshore						Enel Green Power España		41.5005	1.0755	approximate	els Omells de na Gaia	Urgell		Cataluña	https://gem.wiki/Coll_De_Traginers_wind_farm	L914896	G918440	IT0003128367	1	50	50	-99	40	80	120
wind	Spain	Europe	Southern Europe	Coriscada wind farm				24	operating	2000		onshore						Enel Green Power España		43.7138	-7.7209	exact		Ortegal		Galicia	https://gem.wiki/Coriscada_wind_farm	L912365	G915465	IT0003128367	1	24	24	24	2040	2080	2120
wind	Romania	Europe	Eastern Europe	Corugea wind farm	1		Corugea - Cismeaua Noua	70	operating	2011		onshore						Enel SPA		45.9852	24.6859	approximate	Corugea	Tulcea		Northern Dobruja	https://gem.wiki/Corugea_wind_farm	L915416	G919067	IT0003128367	1	70	70	13	2051	2091	2131
wind	Spain	Europe	Southern Europe	Corzán wind farm				43	operating	2007		onshore						Enel Green Power España		42.9226	-8.8479	exact		A Barcala		Galicia	https://gem.wiki/Corzán_wind_farm	L914422	G917872	IT0003128367	1	43	43	17	2047	2087	2127
wind	Spain	Europe	Southern Europe	Coto Teixido wind farm	1			23	operating	2002		onshore						Enel Green Power España		43.5201	-7.7301	exact		Terra Chá		Galicia	https://gem.wiki/Coto_Teixido_wind_farm	L912202	G915284	IT0003128367	1	23		22	2042	2082	2122
wind	Spain	Europe	Southern Europe	Coucepenido wind farm				23	operating	1999		onshore						Enel Green Power España		43.7201	-7.9401	exact		Ferrol		Galicia	https://gem.wiki/Coucepenido_wind_farm	L912203	G915285	IT0003128367	1	23	23	25	2039	2079	2119
wind	Spain	Europe	Southern Europe	Couto De San Sebastian wind farm				18	operating	2007		onshore						Enel Green Power España		42.696	-8.2465	exact		O Deza		Galicia	https://gem.wiki/Couto_De_San_Sebastian_wind_farm	L911022	G913949	IT0003128367	1	18	18	17	2047	2087	2127
wind	United States	Americas	Northern America	Cow Creek Wind Project	1			700	pre-construction			onshore						Enel Green Power		38.8199	-102.346	approximate	Burlington	Cheyenne County		Colorado	https://gem.wiki/Cow_Creek_Wind_Project	L907679	G910335	IT0003128367	1	700	700	-99	40	80	120
wind	Brazil	Americas	Latin America and the Caribbean	Cristal wind farm	Cristal	Complexo Eólico Cristal		30	operating	2017		onshore						Enel Green Power Brasil Participações LTDA		-11.7965	-41.3934	exact	Cafarnaum		Região Geográfica Intermediária de Irecê	Bahia	https://gem.wiki/Cristal_wind_farm	L905193	G906757	IT0003128367	1	90		7	2057	2097	2137
wind	Brazil	Americas	Latin America and the Caribbean	Cristal wind farm	Primavera	Complexo Eólico Cristal		30	operating	2017		onshore						Enel Green Power Brasil Participações LTDA		-11.7334	-41.373	exact	Morro do Chapéu		Região Geográfica Intermediária de Irecê	Bahia	https://gem.wiki/Cristal_wind_farm	L905193	G906758	IT0003128367	1	90		7	2057	2097	2137
wind	Brazil	Americas	Latin America and the Caribbean	Cristal wind farm	São Judas	Complexo Eólico Cristal		30	operating	2017		onshore						Enel Green Power Brasil Participações LTDA		-11.6643	-41.362	exact	Morro do Chapéu		Região Geográfica Intermediária de Irecê	Bahia	https://gem.wiki/Cristal_wind_farm	L905193	G906759	IT0003128367	1	90	90	7	2057	2097	2137
wind	Spain	Europe	Southern Europe	Cronos wind farm				20	pre-construction			onshore						Enel Green Power España		42.3733	2.9206	approximate	Capmany	Alt Emporda		Cataluña	https://gem.wiki/Cronos_wind_farm	L911519	G914506	IT0003128367	1	20	20	-99	40	80	120
wind	Brazil	Americas	Latin America and the Caribbean	Cumaru wind farm	1	Complexo Eólico Cumaru		42	operating	2021		onshore						Enel Green Power Brasil Participações LTDA		-5.1526	-35.7646	exact	São Miguel do Gostoso		Região Geográfica Intermediária de Natal	Rio Grande do Norte	https://gem.wiki/Cumaru_wind_farm	L905194	G906760	IT0003128367	1	206		3	2061	2101	2141
wind	Brazil	Americas	Latin America and the Caribbean	Cumaru wind farm	2	Complexo Eólico Cumaru		42	operating	2021		onshore						Enel Green Power Brasil Participações LTDA		-5.1813	-35.7806	exact	São Miguel do Gostoso		Região Geográfica Intermediária de Natal	Rio Grande do Norte	https://gem.wiki/Cumaru_wind_farm	L905194	G906761	IT0003128367	1	206		3	2061	2101	2141
wind	Brazil	Americas	Latin America and the Caribbean	Cumaru wind farm	3	Complexo Eólico Cumaru		42	operating	2021		onshore						Enel Green Power Brasil Participações LTDA		-5.1319	-35.8098	exact	Pedra Grande		Região Geográfica Intermediária de Natal	Rio Grande do Norte	https://gem.wiki/Cumaru_wind_farm	L905194	G906762	IT0003128367	1	206		3	2061	2101	2141
wind	Brazil	Americas	Latin America and the Caribbean	Cumaru wind farm	4	Complexo Eólico Cumaru		42	operating	2021		onshore						Enel Green Power Brasil Participações LTDA		-5.1601	-35.7833	exact	São Miguel do Gostoso		Região Geográfica Intermediária de Natal	Rio Grande do Norte	https://gem.wiki/Cumaru_wind_farm	L905194	G906763	IT0003128367	1	206		3	2061	2101	2141
wind	Brazil	Americas	Latin America and the Caribbean	Cumaru wind farm	5	Complexo Eólico Cumaru		38	operating	2021		onshore						Enel Green Power Brasil Participações LTDA		-5.1458	-35.7989	exact	São Miguel do Gostoso		Região Geográfica Intermediária de Natal	Rio Grande do Norte	https://gem.wiki/Cumaru_wind_farm	L905194	G906764	IT0003128367	1	206	206	3	2061	2101	2141
wind	Brazil	Americas	Latin America and the Caribbean	Curva Dos Ventos wind farm	Emiliana	Complexo Eólico Curva dos Ventos		28	operating	2014		onshore						Enel Green Power Brasil Participações LTDA		-13.9101	-42.6241	exact	Igaporã		Região Geográfica Intermediária de Guanambi	Bahia	https://gem.wiki/Curva_Dos_Ventos_wind_farm	L905195	G906765	IT0003128367	1	56		10	2054	2094	2134
wind	Brazil	Americas	Latin America and the Caribbean	Curva Dos Ventos wind farm	Joana	Complexo Eólico Curva dos Ventos		28	operating	2014		onshore						Enel Green Power Brasil Participações LTDA		-13.9185	-42.6205	exact	Igaporã		Região Geográfica Intermediária de Guanambi	Bahia	https://gem.wiki/Curva_Dos_Ventos_wind_farm	L905195	G906766	IT0003128367	1	56	56	10	2054	2094	2134
wind	Brazil	Americas	Latin America and the Caribbean	Delfina wind farm	1	Parque Eólico Delfina		28	operating	2017		onshore						Enel Green Power Brasil Participações LTDA		-10.0575	-40.9787	exact	Campo Formoso		Região Geográfica Intermediária de Juazeiro	Bahia	https://gem.wiki/Delfina_wind_farm	L905196	G906767	IT0003128367	1	201		7	2057	2097	2137
wind	Brazil	Americas	Latin America and the Caribbean	Delfina wind farm	2	Parque Eólico Delfina		28	operating	2017		onshore						Enel Green Power Brasil Participações LTDA		-10.0369	-40.9586	exact	Campo Formoso		Região Geográfica Intermediária de Juazeiro	Bahia	https://gem.wiki/Delfina_wind_farm	L905196	G906768	IT0003128367	1	201		7	2057	2097	2137
wind	Brazil	Americas	Latin America and the Caribbean	Delfina wind farm	3	Parque Eólico Delfina		28	operating	2017		onshore						Enel Green Power Brasil Participações LTDA		-10.0044	-40.9342	exact	Campo Formoso		Região Geográfica Intermediária de Juazeiro	Bahia	https://gem.wiki/Delfina_wind_farm	L905196	G906769	IT0003128367	1	201		7	2057	2097	2137
wind	Brazil	Americas	Latin America and the Caribbean	Delfina wind farm	5	Parque Eólico Delfina		28	operating	2017		onshore						Enel Green Power Brasil Participações LTDA		-10.0229	-40.9284	exact	Campo Formoso		Região Geográfica Intermediária de Juazeiro	Bahia	https://gem.wiki/Delfina_wind_farm	L905196	G906770	IT0003128367	1	201		7	2057	2097	2137
wind	Brazil	Americas	Latin America and the Caribbean	Delfina wind farm	6	Parque Eólico Delfina		30	operating	2017		onshore						Enel Green Power Brasil Participações LTDA		-10.0286	-40.9526	exact	Campo Formoso		Região Geográfica Intermediária de Juazeiro	Bahia	https://gem.wiki/Delfina_wind_farm	L905196	G906771	IT0003128367	1	201		7	2057	2097	2137
wind	Brazil	Americas	Latin America and the Caribbean	Delfina wind farm	7	Parque Eólico Delfina		30	operating	2017		onshore						Enel Green Power Brasil Participações LTDA		-9.986	-40.9111	exact	Campo Formoso		Região Geográfica Intermediária de Juazeiro	Bahia	https://gem.wiki/Delfina_wind_farm	L905196	G906772	IT0003128367	1	201		7	2057	2097	2137
wind	Brazil	Americas	Latin America and the Caribbean	Delfina wind farm	8 (Zeus 2)	Parque Eólico Delfina		29	operating	2019		onshore						Enel Green Power Brasil Participações LTDA		-9.9698	-40.8816	exact	Campo Formoso		Região Geográfica Intermediária de Juazeiro	Bahia	https://gem.wiki/Delfina_wind_farm	L905196	G906773	IT0003128367	1	201	201	5	2059	2099	2139
wind	United States	Americas	Northern America	Diamond Vista wind farm	1		Diamond Vista Wind Project LLC	299	operating	2018		onshore						Enel Green Power		38.5549	-97.2521	exact		Marion County		Kansas	https://gem.wiki/Diamond_Vista_wind_farm	L907558	G910194	IT0003128367	1	299	299	6	2058	2098	2138
wind	Spain	Europe	Southern Europe	Do Vilan wind farm			Cabo Vilan	16.9	operating			onshore						Enel Green Power		43.153	-9.2045	exact					https://gem.wiki/Do_Vilan_wind_farm	L920741	G925556	IT0003128367	1	16.9	16.9	-99	40	80	120
wind	Spain	Europe	Southern Europe	Do Vilán wind farm				17	operating	2003		onshore						Enel Green Power España		43.1492	-9.1899	exact		Terra de Soneira		Galicia	https://gem.wiki/Do_Vilán_wind_farm	L910806	G913704	IT0003128367	1	17	17	21	2043	2083	2123
wind	Mexico	Americas	Latin America and the Caribbean	Dolores wind farm		Parque Eólico Dolores	Dolores China	244	operating	2021		onshore						Enel Green Power SPA		25.5466	-98.6054	approximate		China		Nuevo Leon	https://gem.wiki/Dolores_wind_farm	L905221	G906851	IT0003128367	1	244	244	3	2061	2101	2141
wind	Mexico	Americas	Latin America and the Caribbean	Dominica wind farm	1	Parque Eólico Dominica		100	operating	2014		onshore						Enel Green Power SPA		23.3352	-101.333	exact	Charcas			San Luis Potosi	https://gem.wiki/Dominica_wind_farm	L905222	G906852	IT0003128367	1	200		10	2054	2094	2134
wind	Mexico	Americas	Latin America and the Caribbean	Dominica wind farm	2	Parque Eólico Dominica		100	operating	2015		onshore						Enel Green Power SPA		23.3352	-101.333	approximate	Charcas		Charcas	San Luis Potosi	https://gem.wiki/Dominica_wind_farm	L905222	G906853	IT0003128367	1	200	200	9	2055	2095	2135
wind	United States	Americas	Northern America	Drift Sand wind farm	1			108	operating	2016		onshore						Enel Green Power		34.8362	-97.9705	exact		Grady County		Oklahoma	https://gem.wiki/Drift_Sand_wind_farm	L907067	G909511	IT0003128367	1	108	108	8	2056	2096	2136
wind	Greece	Europe	Southern Europe	Dytikos Ktenias wind farm		Δυτικος Κτενιας		34.5	pre-construction			onshore						Enel Green Power Greece SA		37.5659	22.4963	exact		Arcadia Regional Unit	Peloponnese Region	Peloponnese, Western Greece and the Ionian	https://gem.wiki/Dytikos_Ktenias_wind_farm	L913747	G917084	IT0003128367	1	34.5	34.5	-99	40	80	120
wind	Spain	Europe	Southern Europe	EEE repotenciado wind farm	2-3			32	operating	2008		onshore						Enel Green Power España		36.0128	-5.6049	approximate	Tarifa		Cádiz	Andalucía	https://gem.wiki/EEE_repotenciado_wind_farm	L913501	G916788	IT0003128367	1	32	32	16	2048	2088	2128
wind	Spain	Europe	Southern Europe	El Campo wind farm (Spain)				20	operating	2019		onshore						Enel Green Power España		41.911	-1.5001	exact		Campo de Borja		Aragon	https://gem.wiki/El_Campo_wind_farm_(Spain)	L911535	G914525	IT0003128367	1	20	20	5	2059	2099	2139
wind	Spain	Europe	Southern Europe	El Puerto wind farm				25	operating	2002		onshore						Enel Green Power España		40.767	-0.805	exact		Cuencas Mineras		Aragon	https://gem.wiki/El_Puerto_wind_farm	L912612	G915743	IT0003128367	1	25	25	22	2042	2082	2122
wind	Spain	Europe	Southern Europe	El Puntal wind farm	1			26	operating	2011		onshore						Enel Green Power España [50%]		37.1698	-4.8464	exact		Guadalteba	Malaga	Andalusia	https://gem.wiki/El_Puntal_wind_farm	L910219	G915933	IT0003128367	0.5	26	26	13	2051	2091	2131
wind	Spain	Europe	Southern Europe	El Sequet wind farm				50	pre-construction			onshore						Enel Green Power España		41.0943	0.3141	approximate	Batea	Terra Alta		Cataluña	https://gem.wiki/El_Sequet_wind_farm	L914919	G918469	IT0003128367	1	50	50	-99	40	80	120
wind	Slovakia	Europe	Eastern Europe	ENEL wind farm (Slovakia)				104	cancelled			onshore						Enel Slovenské Elektrárne		48.7412	19.4529	approximate					https://gem.wiki/ENEL_wind_farm_(Slovakia)	L915728	G919438	IT0003128367	1	104	104	-99	40	80	120
wind	Spain	Europe	Southern Europe	Enix wind farm				13	operating	1997		onshore						Enel Green Power España		36.8773	-2.6018	exact			Almeria	Andalusia	https://gem.wiki/Enix_wind_farm	L909529	G912287	IT0003128367	1	13	13	27	2037	2077	2117
wind	Spain	Europe	Southern Europe	Escucha wind farm				19	operating	2001		onshore						Enel Green Power España		40.767	-0.805	exact		Cuencas Mineras		Aragon	https://gem.wiki/Escucha_wind_farm	L911367	G914336	IT0003128367	1	19	19	23	2041	2081	2121
wind	Spain	Europe	Southern Europe	Faladoira wind farm	1			24	operating	2002		onshore						Enel Green Power España		43.5264	-7.8124	exact		Ortegal		Galicia	https://gem.wiki/Faladoira_wind_farm	L912386	G915489	IT0003128367	1	24	24	22	2042	2082	2122
wind	Spain	Europe	Southern Europe	Farlán wind farm				41	operating	2019		onshore						Enel Green Power España		41.084	-0.741	exact		Cuencas Mineras		Aragon	https://gem.wiki/Farlán_wind_farm	L914290	G917713	IT0003128367	1	41	41	5	2059	2099	2139
wind	Chile	Americas	Latin America and the Caribbean	Faro del Sur wind farm		Parque Eólico Faro del Sur		240	pre-construction	2025		onshore						Enel Green Power SPA; Highly Innovative Fuels (HIF)		-52.4705	-72.5327	approximate	Río Verde	Provincia de Magallanes		Region of Magallanes and Chilean Antarctica	https://gem.wiki/Faro_del_Sur_wind_farm	L916533	G920552	IT0003128367	0.5	240	240	-1	2065	2105	2145
wind	Spain	Europe	Southern Europe	Farrapa wind farm	1			20	operating	2008		onshore						Enel Green Power España; Elawan Energy		43.3829	-7.364	exact		A Mariña Central		Galicia	https://gem.wiki/Farrapa_wind_farm	L911549	G914541	IT0003128367	0.5	20	20	16	2048	2088	2128
wind	United States	Americas	Northern America	Fenner Wind Power Project	1			30	operating	2001		onshore						Enel Green Power		42.9769	-75.7603	exact		Madison County		New York	https://gem.wiki/Fenner_Wind_Power_Project	L906550	G908841	IT0003128367	1	30	30	23	2041	2081	2121
wind	Spain	Europe	Southern Europe	Finca De Mogán wind farm	Arico			17	operating	1998		onshore						Enel Green Power España		28.1644	-16.4456	exact	Arico		Santa Cruz de Tenerife		https://gem.wiki/Finca_De_Mogán_wind_farm	L910813	G913711	IT0003128367	1	17	17	26	2038	2078	2118
wind	Australia	Oceania	Australia and New Zealand	Flat Rock wind farm	1			75.6	construction	2024		onshore						Enel Green Power		-33.9928	117.354	exact		Kojonup	Great Southern Region	Western Australia	https://gem.wiki/Flat_Rock_wind_farm	L922309	G927830	IT0003128367	1	75.6	75.6	0	2064	2104	2144
wind	United States	Americas	Northern America	Flat Rock Wind Project	1			300	pre-construction			onshore						Enel Green Power		46.9049	-101.148	approximate					https://gem.wiki/Flat_Rock_Wind_Project	L921935	G927272	IT0003128367	1	300	300	-99	40	80	120
wind	Colombia	Americas	Latin America and the Caribbean	Florguajira wind farm		Parque Eólico Florguajira		100	cancelled			onshore						Enel Green Power SPA		11.8297	-71.4525	approximate	Uribia			La Guajira	https://gem.wiki/Florguajira_wind_farm	L905184	G906747	IT0003128367	1	100		-99	40	80	120
wind	Brazil	Americas	Latin America and the Caribbean	Fontes Dos Ventos 2 wind farm	Pau Ferro 2	Complexo Eólico Fontes dos Ventos 2		50	operating	2021		onshore						Enel Green Power Brasil Participações LTDA		-9.0365	-38.0999	exact	Tacaratu		Região Geográfica Intermediária de Serra Talhada	Pernambuco	https://gem.wiki/Fontes_Dos_Ventos_2_wind_farm	L905197	G906774	IT0003128367	1	100		3	2061	2101	2141
wind	Brazil	Americas	Latin America and the Caribbean	Fontes Dos Ventos 2 wind farm	Tacaicó 2	Complexo Eólico Fontes dos Ventos 2		50	operating	2021		onshore						Enel Green Power Brasil Participações LTDA		-9.0167	-38.0747	exact	Tacaratu		Região Geográfica Intermediária de Serra Talhada	Pernambuco	https://gem.wiki/Fontes_Dos_Ventos_2_wind_farm	L905197	G906775	IT0003128367	1	100	100	3	2061	2101	2141
wind	Brazil	Americas	Latin America and the Caribbean	Fontes Dos Ventos wind farm	Pau Ferro	Complexo Eólico Fontes dos Ventos		31	operating	2015		onshore						Enel Green Power Brasil Participações LTDA		-9.0625	-38.1186	exact	Tacaratu		Região Geográfica Intermediária de Serra Talhada	Pernambuco	https://gem.wiki/Fontes_Dos_Ventos_wind_farm	L905198	G906776	IT0003128367	1	81		9	2055	2095	2135
wind	Brazil	Americas	Latin America and the Caribbean	Fontes Dos Ventos wind farm	Pedra do Gerônimo	Complexo Eólico Fontes dos Ventos		31	operating	2015		onshore						Enel Green Power Brasil Participações LTDA		-9.0672	-38.1448	exact	Tacaratu		Região Geográfica Intermediária de Serra Talhada	Pernambuco	https://gem.wiki/Fontes_Dos_Ventos_wind_farm	L905198	G906777	IT0003128367	1	81		9	2055	2095	2135
wind	Brazil	Americas	Latin America and the Caribbean	Fontes Dos Ventos wind farm	Tacaicó	Complexo Eólico Fontes dos Ventos		19	operating	2015		onshore						Enel Green Power Brasil Participações LTDA		-9.0187	-38.056	exact	Tacaratu		Região Geográfica Intermediária de Serra Talhada	Pernambuco	https://gem.wiki/Fontes_Dos_Ventos_wind_farm	L905198	G906778	IT0003128367	1	81	81	9	2055	2095	2135
wind	United States	Americas	Northern America	Fourmile wind farm	1			300	pre-construction			onshore						Enel Green Power		43.5845	-94.8299	approximate	Dunnell	Martin County		Minnesota	https://gem.wiki/Fourmile_wind_farm	L907577	G910214	IT0003128367	1	300	300	-99	40	80	120
wind	Spain	Europe	Southern Europe	Galatea wind farm			La Jonquera	49	pre-construction	2024		onshore						Enel Green Power España; URIEL Renewables INC		42.4161	2.8954	exact	la Jonquera	Alt Emporda		Cataluña	https://gem.wiki/Galatea_wind_farm	L914791	G918298	IT0003128367	0.5	49	49	0	2064	2104	2144
wind	Greece	Europe	Southern Europe	Geraki (Enel) wind farm		Γερακι		14	operating	2003		onshore						Enel Green Power Greece SA		41.1536	25.8685	exact		Rodopi Regional Unit	Eastern Macedonia and Thrace	Macedonia and Thrace	https://gem.wiki/Geraki_(Enel)_wind_farm	L910103	G912923	IT0003128367	1	14	14	21	2043	2083	2123
wind	South Africa	Africa	Sub-Saharan Africa	Gibson Bay wind farm	1			111	operating	2017		onshore						Enel Green Power		-34.1286	24.4818	exact	Kouga Local Municipality	Sarah Baartman District Municipality		Eastern Cape	https://gem.wiki/Gibson_Bay_wind_farm	L900024	G900026	IT0003128367	1	111	111	7	2057	2097	2137
wind	United States	Americas	Northern America	Goodwell wind farm	1			200	operating	2015		onshore						Gulf Pacific Power [80%]; Enel Green Power SPA [20%]		36.508	-101.662	exact		Texas County		Oklahoma	https://gem.wiki/Goodwell_wind_farm	L907369	G909927	IT0003128367	0.2	200	200	9	2055	2095	2135
wind	Spain	Europe	Southern Europe	Granadilla wind farm				10	pre-construction			onshore						Enel Green Power España		28.1291	-16.7593	approximate	Granadilla de Abona	Tenerife	Santa Cruz de Tenerife	Las Islas Canarias	https://gem.wiki/Granadilla_wind_farm	L907874	G910548	IT0003128367	1	10	10	-99	40	80	120
wind	Canada	Americas	Northern America	Grizzly Bear Creek wind farm				152	operating	2022		onshore						Enel Green Power SPA		53.1604	-116.972	exact		Minburn County No. 27		Alberta	https://gem.wiki/Grizzly_Bear_Creek_wind_farm	L906586	G908885	IT0003128367	1	152	152	2	2062	2102	2142
wind	United States	Americas	Northern America	Harvest Ridge (Enel) Wind Project	1			362	pre-construction			onshore						Enel Green Power		38.2612	-94.3504	approximate		Bates County		Missouri	https://gem.wiki/Harvest_Ridge_(Enel)_Wind_Project	L907628	G910273	IT0003128367	1	362	362	-99	40	80	120
wind	United States	Americas	Northern America	High Lonesome wind farm	1			450	operating	2021		onshore						Enel Green Power		31.0612	-101.898	exact		Crockett County		Texas	https://gem.wiki/High_Lonesome_wind_farm	L906699	G910303	IT0003128367	1	501		3	2061	2101	2141
wind	United States	Americas	Northern America	High Lonesome wind farm	2			51	operating	2021		onshore						Enel Green Power		31.1081	-101.916	exact		Upton County		Texas	https://gem.wiki/High_Lonesome_wind_farm	L906699	G909021	IT0003128367	1	501	501	3	2061	2101	2141
wind	United States	Americas	Northern America	Hilltopper wind farm	1			185	operating	2019		onshore						Enel Green Power		40.0168	-89.3865	exact		Logan County		Illinois	https://gem.wiki/Hilltopper_wind_farm	L907318	G909855	IT0003128367	1	185	185	5	2059	2099	2139
wind	United States	Americas	Northern America	Hope Ridge Wind Project	1			260	pre-construction			onshore						Enel Green Power		38.6711	-96.9427	approximate		Dickinson County		Kansas	https://gem.wiki/Hope_Ridge_Wind_Project	L907521	G910152	IT0003128367	1	260	260	-99	40	80	120
wind	Spain	Europe	Southern Europe	Iberos wind farm				49	pre-construction			onshore						Enel Green Power España		40.7751	-0.5529	approximate	Ejulve			Aragón	https://gem.wiki/Iberos_wind_farm	L914794	G918304	IT0003128367	1	49	49	-99	40	80	120
wind	United States	Americas	Northern America	Inertia Wind Project	1			397	operating	2023		onshore						Enel Green Power		33.1983	-99.3906	exact		Haskell County		Texas	https://gem.wiki/Inertia_Wind_Project	L907621	G910264	IT0003128367	1	397	397	1	2063	2103	2143
wind	South Africa	Africa	Sub-Saharan Africa	Karusa wind farm	1			140	operating	2022		onshore						Enel Green Power		-32.8858	20.6567	exact	Karoo Hoogland Local Municipality	Namakwa District Municipality		Northern Cape	https://gem.wiki/Karusa_wind_farm	L900025	G900027	IT0003128367	1	140	140	2	2062	2102	2142
wind	Greece	Europe	Southern Europe	Kathara (Enel) wind farm		Καθαρα	Kafireas	18	operating	2019		onshore						Enel Green Power Greece SA		38.1138	24.5202	exact		Euboea Regional Unit	Central Greece	Thessaly and Central Greece	https://gem.wiki/Kathara_(Enel)_wind_farm	L911319	G914285	IT0003128367	1	18	18	5	2059	2099	2139
wind	Greece	Europe	Southern Europe	Kerasia (Enel) wind farm	1	Κερασια	Kafireas	28	operating	2019		onshore						Enel Green Power Greece SA		38.082	24.4952	exact		Euboea Regional Unit	Central Greece	Thessaly and Central Greece	https://gem.wiki/Kerasia_(Enel)_wind_farm	L912981	G916177	IT0003128367	1	28	28	5	2059	2099	2139
wind	Russia	Europe	Eastern Europe	Kolskaya wind farm		Кольская ВЭС	Kola	201	operating	2022		onshore						Enel Russia		69.0185	34.9722	exact		Kolsky District		Murmansk Oblast	https://gem.wiki/Kolskaya_wind_farm	L905609	G907699	IT0003128367	1	201	201	2	2062	2102	2142
wind	Greece	Europe	Southern Europe	Koutsoutes wind farm		Κουτσουτης	Koutsoutis	12	operating	2009		onshore						Enel Green Power Greece SA		36.2433	28.0623	exact		Rhodes Regional Unit	South Aegean	Aegean	https://gem.wiki/Koutsoutes_wind_farm	L908678	G911391	IT0003128367	1	12	12	15	2049	2089	2129
wind	France	Europe	Western Europe	La Bouleste wind farm				10	operating	2010		onshore						Enel SPA		44.2976	2.6869	exact		Aveyron		Occitania	https://gem.wiki/La_Bouleste_wind_farm	L907955	G910631	IT0003128367	1	10	10	14	2050	2090	2130
wind	Chile	Americas	Latin America and the Caribbean	La Cabana (Enel) wind farm		Parque Eólico La Cabana (Enel)		105.6	construction			onshore						Enel Chile		-37.8035	-72.7018	approximate					https://gem.wiki/La_Cabana_(Enel)_wind_farm	L921864	G927157	IT0003128367	1	105.6	105.6	-99	40	80	120
wind	Spain	Europe	Southern Europe	La Comella wind farm				49	pre-construction			onshore						Enel Green Power España		41.4401	0.8348	approximate	la Pobla de Cérvoles	Garrigues		Cataluña	https://gem.wiki/La_Comella_wind_farm	L914796	G918306	IT0003128367	1	49	49	-99	40	80	120
wind	Spain	Europe	Southern Europe	La Estanca wind farm				24	operating	2019		onshore						Enel Green Power España		41.902	-1.487	exact		Campo de Borja		Aragon	https://gem.wiki/La_Estanca_wind_farm	L912436	G915545	IT0003128367	1	24	24	5	2059	2099	2139
wind	Spain	Europe	Southern Europe	La Maçana wind farm				50	pre-construction			onshore						Enel Green Power España		41.6442	1.5701	approximate	Rubió	Anoia		Cataluña	https://gem.wiki/La_Maçana_wind_farm	L914961	G918515	IT0003128367	1	50	50	-99	40	80	120
wind	Spain	Europe	Southern Europe	La Muela wind farm	2			13	operating	1997		onshore						Enel Green Power España		41.599	-1.1501	exact		Valdejalón		Aragon	https://gem.wiki/La_Muela_wind_farm	L909572	G912333	IT0003128367	1	30		27	2037	2077	2117
wind	Spain	Europe	Southern Europe	La Muela wind farm	3			17	operating	1999		onshore						Enel Green Power España		41.599	-1.1501	exact		Valdejalón		Aragon	https://gem.wiki/La_Muela_wind_farm	L909572	G913751	IT0003128367	1	30	30	25	2039	2079	2119
wind	Spain	Europe	Southern Europe	La Tossa wind farm			Mola de Pascual	49.9	construction	2023		onshore						Totvent 2000 [70%]; Enel Green Power [30%]		41.0166	0.5147	approximate	Pinell de Brai				https://gem.wiki/La_Tossa_wind_farm	L920755	G925570	IT0003128367	0.3	49.9	49.9	1	2063	2103	2143
wind	Brazil	Americas	Latin America and the Caribbean	Lagoa Dos Ventos 3 wind farm	Ventos de São Roque 1	Parque Eólico Lagoa dos Ventos 3		50	operating	2022		onshore						Enel Green Power Brasil Participações LTDA		-8.7646	-41.6575	exact	Dom Inocêncio		Região Geográfica Intermediária de São Raimundo Nonato	Piauí	https://gem.wiki/Lagoa_Dos_Ventos_3_wind_farm	L905199	G906779	IT0003128367	1	400		2	2062	2102	2142
wind	Brazil	Americas	Latin America and the Caribbean	Lagoa Dos Ventos 3 wind farm	Ventos de São Roque 11	Parque Eólico Lagoa dos Ventos 3		50	operating	2022		onshore						Enel Green Power Brasil Participações LTDA		-8.8264	-41.6269	exact	Dom Inocêncio		Região Geográfica Intermediária de São Raimundo Nonato	Piauí	https://gem.wiki/Lagoa_Dos_Ventos_3_wind_farm	L905199	G906783	IT0003128367	1	400		2	2062	2102	2142
wind	Brazil	Americas	Latin America and the Caribbean	Lagoa Dos Ventos 3 wind farm	Ventos de São Roque 16	Parque Eólico Lagoa dos Ventos 3		50	operating	2022		onshore						Enel Green Power Brasil Participações LTDA		-8.8998	-41.5911	exact	Dom Inocêncio		Região Geográfica Intermediária de São Raimundo Nonato	Piauí	https://gem.wiki/Lagoa_Dos_Ventos_3_wind_farm	L905199	G906784	IT0003128367	1	400		2	2062	2102	2142
wind	Brazil	Americas	Latin America and the Caribbean	Lagoa Dos Ventos 3 wind farm	Ventos de São Roque 17	Parque Eólico Lagoa dos Ventos 3		50	operating	2022		onshore						Enel Green Power Brasil Participações LTDA		-8.8975	-41.5555	exact	Dom Inocêncio	Região Administrativa Integrada de Desenvolvimento do Polo Petrolina e Juazeiro	Região Geográfica Intermediária de São Raimundo Nonato	Piauí	https://gem.wiki/Lagoa_Dos_Ventos_3_wind_farm	L905199	G906785	IT0003128367	1	400		2	2062	2102	2142
wind	Brazil	Americas	Latin America and the Caribbean	Lagoa Dos Ventos 3 wind farm	Ventos de São Roque 18	Parque Eólico Lagoa dos Ventos 3		50	operating	2022		onshore						Enel Green Power Brasil Participações LTDA		-8.9155	-41.5576	exact	Dom Inocêncio		Região Geográfica Intermediária de São Raimundo Nonato	Piauí	https://gem.wiki/Lagoa_Dos_Ventos_3_wind_farm	L905199	G906786	IT0003128367	1	400		2	2062	2102	2142
wind	Brazil	Americas	Latin America and the Caribbean	Lagoa Dos Ventos 3 wind farm	Ventos de São Roque 2	Parque Eólico Lagoa dos Ventos 3		50	operating	2022		onshore						Enel Green Power Brasil Participações LTDA		-8.8056	-41.6504	exact	Dom Inocêncio		Região Geográfica Intermediária de São Raimundo Nonato	Piauí	https://gem.wiki/Lagoa_Dos_Ventos_3_wind_farm	L905199	G906780	IT0003128367	1	400		2	2062	2102	2142
wind	Brazil	Americas	Latin America and the Caribbean	Lagoa Dos Ventos 3 wind farm	Ventos de São Roque 4	Parque Eólico Lagoa dos Ventos 3		50	operating	2022		onshore						Enel Green Power Brasil Participações LTDA		-8.8299	-41.5908	exact	Dom Inocêncio		Região Geográfica Intermediária de São Raimundo Nonato	Piauí	https://gem.wiki/Lagoa_Dos_Ventos_3_wind_farm	L905199	G906781	IT0003128367	1	400		2	2062	2102	2142
wind	Brazil	Americas	Latin America and the Caribbean	Lagoa Dos Ventos 3 wind farm	Ventos de São Roque 8	Parque Eólico Lagoa dos Ventos 3		50	operating	2022		onshore						Enel Green Power Brasil Participações LTDA		-8.9352	-41.6045	exact	Dom Inocêncio		Região Geográfica Intermediária de São Raimundo Nonato	Piauí	https://gem.wiki/Lagoa_Dos_Ventos_3_wind_farm	L905199	G906782	IT0003128367	1	400	400	2	2062	2102	2142
wind	Brazil	Americas	Latin America and the Caribbean	Lagoa Dos Ventos 4 wind farm	4	Complexo Eólico Lagoa dos Ventos	Complexo Eólico Lagoa dos Ventos 4	80	construction			onshore						Enel Green Power Brasil Participações LTDA		-8.9001	-41.5001	approximate	Dom Inocêncio			Piauí	https://gem.wiki/Lagoa_Dos_Ventos_4_wind_farm	L905200	G906787	IT0003128367	1	80	80	-99	40	80	120
wind	Brazil	Americas	Latin America and the Caribbean	Lagoa Dos Ventos 5 wind farm	5	Complexo Eólico Lagoa dos Ventos	Complexo Eólico Lagoa dos Ventos 5	396	construction			onshore						Enel Green Power Brasil Participações LTDA		-8.9001	-41.5001	approximate	Dom Inocêncio			Piauí	https://gem.wiki/Lagoa_Dos_Ventos_5_wind_farm	L905201	G906788	IT0003128367	1	396	396	-99	40	80	120
wind	Brazil	Americas	Latin America and the Caribbean	Lagoa Dos Ventos wind farm	Ventos de Santa Angela 1	Parque Eólico Lagoa dos Ventos		32	operating	2020		onshore						Enel Green Power Brasil Participações LTDA		-8.5198	-41.5584	exact	Queimada Nova		Região Geográfica Intermediária de São Raimundo Nonato	Piauí	https://gem.wiki/Lagoa_Dos_Ventos_wind_farm	L905202	G906789	IT0003128367	1	721		4	2060	2100	2140
wind	Brazil	Americas	Latin America and the Caribbean	Lagoa Dos Ventos wind farm	Ventos de Santa Angela 10	Parque Eólico Lagoa dos Ventos		41	operating	2020		onshore						Enel Green Power Brasil Participações LTDA		-8.6329	-41.4971	exact	Lagoa do Barro do Piauí		Região Geográfica Intermediária de São Raimundo Nonato	Piauí	https://gem.wiki/Lagoa_Dos_Ventos_wind_farm	L905202	G906798	IT0003128367	1	721		4	2060	2100	2140
wind	Brazil	Americas	Latin America and the Caribbean	Lagoa Dos Ventos wind farm	Ventos de Santa Angela 11	Parque Eólico Lagoa dos Ventos		44	operating	2020		onshore						Enel Green Power Brasil Participações LTDA		-8.6671	-41.5098	exact	Lagoa do Barro do Piauí		Região Geográfica Intermediária de São Raimundo Nonato	Piauí	https://gem.wiki/Lagoa_Dos_Ventos_wind_farm	L905202	G906799	IT0003128367	1	721		4	2060	2100	2140
wind	Brazil	Americas	Latin America and the Caribbean	Lagoa Dos Ventos wind farm	Ventos de Santa Angela 14	Parque Eólico Lagoa dos Ventos		43	operating	2020		onshore						Enel Green Power Brasil Participações LTDA		-8.7088	-41.5181	exact	Lagoa do Barro do Piauí		Região Geográfica Intermediária de São Raimundo Nonato	Piauí	https://gem.wiki/Lagoa_Dos_Ventos_wind_farm	L905202	G906802	IT0003128367	1	721		4	2060	2100	2140
wind	Brazil	Americas	Latin America and the Caribbean	Lagoa Dos Ventos wind farm	Ventos de Santa Angela 2	Parque Eólico Lagoa dos Ventos		32	operating	2020		onshore						Enel Green Power Brasil Participações LTDA		-8.5442	-41.5751	exact	Lagoa do Barro do Piauí		Região Geográfica Intermediária de São Raimundo Nonato	Piauí	https://gem.wiki/Lagoa_Dos_Ventos_wind_farm	L905202	G906790	IT0003128367	1	721		4	2060	2100	2140
wind	Brazil	Americas	Latin America and the Caribbean	Lagoa Dos Ventos wind farm	Ventos de Santa Angela 3	Parque Eólico Lagoa dos Ventos		32	operating	2020		onshore						Enel Green Power Brasil Participações LTDA		-8.5764	-41.5778	exact	Lagoa do Barro do Piauí		Região Geográfica Intermediária de São Raimundo Nonato	Piauí	https://gem.wiki/Lagoa_Dos_Ventos_wind_farm	L905202	G906791	IT0003128367	1	721		4	2060	2100	2140
wind	Brazil	Americas	Latin America and the Caribbean	Lagoa Dos Ventos wind farm	Ventos de Santa Angela 4	Parque Eólico Lagoa dos Ventos		32	operating	2020		onshore						Enel Green Power Brasil Participações LTDA		-8.6002	-41.5908	exact	Lagoa do Barro do Piauí		Região Geográfica Intermediária de São Raimundo Nonato	Piauí	https://gem.wiki/Lagoa_Dos_Ventos_wind_farm	L905202	G906792	IT0003128367	1	721		4	2060	2100	2140
wind	Brazil	Americas	Latin America and the Caribbean	Lagoa Dos Ventos wind farm	Ventos de Santa Angela 5	Parque Eólico Lagoa dos Ventos		32	operating	2020		onshore						Enel Green Power Brasil Participações LTDA		-8.4625	-41.4451	exact	Lagoa do Barro do Piauí		Região Geográfica Intermediária de Picos	Piauí	https://gem.wiki/Lagoa_Dos_Ventos_wind_farm	L905202	G906793	IT0003128367	1	721		4	2060	2100	2140
wind	Brazil	Americas	Latin America and the Caribbean	Lagoa Dos Ventos wind farm	Ventos de Santa Angela 6	Parque Eólico Lagoa dos Ventos		32	operating	2020		onshore						Enel Green Power Brasil Participações LTDA		-8.4891	-41.4516	exact	Queimada Nova		Região Geográfica Intermediária de Picos	Piauí	https://gem.wiki/Lagoa_Dos_Ventos_wind_farm	L905202	G906794	IT0003128367	1	721		4	2060	2100	2140
wind	Brazil	Americas	Latin America and the Caribbean	Lagoa Dos Ventos wind farm	Ventos de Santa Angela 7	Parque Eólico Lagoa dos Ventos		25	operating	2020		onshore						Enel Green Power Brasil Participações LTDA		-8.5306	-41.4805	exact	Queimada Nova		Região Geográfica Intermediária de São Raimundo Nonato	Piauí	https://gem.wiki/Lagoa_Dos_Ventos_wind_farm	L905202	G906795	IT0003128367	1	721		4	2060	2100	2140
wind	Brazil	Americas	Latin America and the Caribbean	Lagoa Dos Ventos wind farm	Ventos de Santa Angela 8	Parque Eólico Lagoa dos Ventos		32	operating	2020		onshore						Enel Green Power Brasil Participações LTDA		-8.5608	-41.4984	exact	Queimada Nova		Região Geográfica Intermediária de São Raimundo Nonato	Piauí	https://gem.wiki/Lagoa_Dos_Ventos_wind_farm	L905202	G906796	IT0003128367	1	721		4	2060	2100	2140
wind	Brazil	Americas	Latin America and the Caribbean	Lagoa Dos Ventos wind farm	Ventos de Santa Angela 9	Parque Eólico Lagoa dos Ventos		44	operating	2020		onshore						Enel Green Power Brasil Participações LTDA		-8.5952	-41.4795	exact	Queimada Nova		Região Geográfica Intermediária de São Raimundo Nonato	Piauí	https://gem.wiki/Lagoa_Dos_Ventos_wind_farm	L905202	G906797	IT0003128367	1	721		4	2060	2100	2140
wind	Brazil	Americas	Latin America and the Caribbean	Lagoa Dos Ventos wind farm	Ventos de Santa Angela 12	Parque Eólico Lagoa dos Ventos		30	operating	2021		onshore						Enel Green Power Brasil Participações LTDA		-8.7616	-41.4303	exact	Dom Inocêncio		Região Geográfica Intermediária de São Raimundo Nonato	Piauí	https://gem.wiki/Lagoa_Dos_Ventos_wind_farm	L905202	G906800	IT0003128367	1	721		3	2061	2101	2141
wind	Brazil	Americas	Latin America and the Caribbean	Lagoa Dos Ventos wind farm	Ventos de Santa Angela 13	Parque Eólico Lagoa dos Ventos		28	operating	2021		onshore						Enel Green Power Brasil Participações LTDA		-8.7664	-41.4087	exact			Região Geográfica Intermediária de São Raimundo Nonato	Piauí	https://gem.wiki/Lagoa_Dos_Ventos_wind_farm	L905202	G906801	IT0003128367	1	721		3	2061	2101	2141
wind	Brazil	Americas	Latin America and the Caribbean	Lagoa Dos Ventos wind farm	Ventos de Santa Angela 15	Parque Eólico Lagoa dos Ventos		44	operating	2021		onshore						Enel Green Power Brasil Participações LTDA		-8.722	-41.4741	exact	Queimada Nova		Região Geográfica Intermediária de São Raimundo Nonato	Piauí	https://gem.wiki/Lagoa_Dos_Ventos_wind_farm	L905202	G906803	IT0003128367	1	721		3	2061	2101	2141
wind	Brazil	Americas	Latin America and the Caribbean	Lagoa Dos Ventos wind farm	Ventos de Santa Ângela 16	Parque Eólico Lagoa dos Ventos		32	operating	2021		onshore						Enel Green Power Brasil Participações LTDA		-8.7326	-41.559	exact	Lagoa do Barro do Piauí		Região Geográfica Intermediária de São Raimundo Nonato	Piauí	https://gem.wiki/Lagoa_Dos_Ventos_wind_farm	L905202	G906804	IT0003128367	1	721		3	2061	2101	2141
wind	Brazil	Americas	Latin America and the Caribbean	Lagoa Dos Ventos wind farm	Ventos de Santa Angela 17	Parque Eólico Lagoa dos Ventos		47	operating	2021		onshore						Enel Green Power Brasil Participações LTDA		-8.7159	-41.4209	exact	Lagoa do Barro do Piauí		Região Geográfica Intermediária de São Raimundo Nonato	Piauí	https://gem.wiki/Lagoa_Dos_Ventos_wind_farm	L905202	G906805	IT0003128367	1	721		3	2061	2101	2141
wind	Brazil	Americas	Latin America and the Caribbean	Lagoa Dos Ventos wind farm	Ventos de Santa Ângela 18	Parque Eólico Lagoa dos Ventos		32	operating	2021		onshore						Enel Green Power Brasil Participações LTDA		-8.7389	-41.3999	exact	Lagoa do Barro do Piauí	Região Administrativa Integrada de Desenvolvimento do Polo Petrolina e Juazeiro	Região Geográfica Intermediária de São Raimundo Nonato	Piauí	https://gem.wiki/Lagoa_Dos_Ventos_wind_farm	L905202	G906806	IT0003128367	1	721		3	2061	2101	2141
wind	Brazil	Americas	Latin America and the Caribbean	Lagoa Dos Ventos wind farm	Ventos de Santa Angela 19	Parque Eólico Lagoa dos Ventos		30	operating	2021		onshore						Enel Green Power Brasil Participações LTDA		-8.7462	-41.4716	exact	Queimada Nova		Região Geográfica Intermediária de São Raimundo Nonato	Piauí	https://gem.wiki/Lagoa_Dos_Ventos_wind_farm	L905202	G906807	IT0003128367	1	721		3	2061	2101	2141
wind	Brazil	Americas	Latin America and the Caribbean	Lagoa Dos Ventos wind farm	Ventos de Santa Angela 20	Parque Eólico Lagoa dos Ventos		30	operating	2021		onshore						Enel Green Power Brasil Participações LTDA		-8.7818	-41.452	exact	Lagoa do Barro do Piauí		Região Geográfica Intermediária de São Raimundo Nonato	Piauí	https://gem.wiki/Lagoa_Dos_Ventos_wind_farm	L905202	G906808	IT0003128367	1	721		3	2061	2101	2141
wind	Brazil	Americas	Latin America and the Caribbean	Lagoa Dos Ventos wind farm	Ventos de Santa Angela 21	Parque Eólico Lagoa dos Ventos		27	operating	2021		onshore						Enel Green Power Brasil Participações LTDA		-8.8066	-41.4651	exact	Queimada Nova		Região Geográfica Intermediária de São Raimundo Nonato	Piauí	https://gem.wiki/Lagoa_Dos_Ventos_wind_farm	L905202	G906809	IT0003128367	1	721	721	3	2061	2101	2141
wind	Spain	Europe	Southern Europe	Lanchal wind farm				21	operating	2012		onshore						Enel Green Power España		40.6336	-4.4669	exact			Ávila	Castile and León	https://gem.wiki/Lanchal_wind_farm	L911887	G914918	IT0003128367	1	21	21	12	2052	2092	2132
wind	Spain	Europe	Southern Europe	Las Angosturas wind farm				36	operating	2013		onshore						Enel Green Power España		37.0551	-4.8589	approximate	Teba		Málaga	Andalucía	https://gem.wiki/Las_Angosturas_wind_farm	L913902	G917259	IT0003128367	1	36	36	11	2053	2093	2133
wind	Spain	Europe	Southern Europe	Las Pardas wind farm				50	operating	2008		onshore						Enel Green Power España		41.8804	-4.3624	exact			Palencia	Castile and León	https://gem.wiki/Las_Pardas_wind_farm	L914967	G918523	IT0003128367	1	50	50	16	2048	2088	2128
wind	Spain	Europe	Southern Europe	Leboreiro wind farm			Leboreiro Endesa	21	operating	2005		onshore						Enel Green Power España		43.4668	-7.7238	exact		Terra Chá		Galicia	https://gem.wiki/Leboreiro_wind_farm	L911889	G914921	IT0003128367	1	21	21	19	2045	2085	2125
wind	Spain	Europe	Southern Europe	Les Crestes wind farm				45	pre-construction			onshore						Enel Green Power España		41.0943	0.3141	approximate	Batea	Terra Alta		Cataluña	https://gem.wiki/Les_Crestes_wind_farm	L914544	G918009	IT0003128367	1	45	45	-99	40	80	120
wind	France	Europe	Western Europe	Les Eparmonts wind farm			Ferriere-et-Lafolie	12	operating	2009		onshore						Enel SPA		48.385	5.067	exact		Haute-Marne		Grand Est	https://gem.wiki/Les_Eparmonts_wind_farm	L909049	G911781	IT0003128367	1	12	12	15	2049	2089	2129
wind	Spain	Europe	Southern Europe	Les Forques wind farm	1			30	operating	2009		onshore						Enel Green Power España		41.4995	1.2194	exact	Forès	Conca de Barberà	Tarragona	Catalonia	https://gem.wiki/Les_Forques_wind_farm	L909050	G911782	IT0003128367	1	42		15	2049	2089	2129
wind	Spain	Europe	Southern Europe	Les Forques wind farm	2			12	operating			onshore						Enel Green Power España; Elawan Energy		41.4995	1.2194	exact	Forès	Conca de Barberà	Tarragona	Catalonia	https://gem.wiki/Les_Forques_wind_farm	L909050	G916557	IT0003128367	0.5	42	42	-99	40	80	120
wind	United States	Americas	Northern America	Lindahl wind farm	1			150	operating	2017		onshore						Enel Green Power		48.4703	-102.99	exact		Williams County		North Dakota	https://gem.wiki/Lindahl_wind_farm	L907212	G909725	IT0003128367	1	150	150	7	2057	2097	2137
wind	Greece	Europe	Southern Europe	Lithos wind farm		Λιθος		19	operating	2009		onshore						Enel Green Power Greece SA		38.0924	22.1162	exact		Achaea Regional Unit	Western Greece	Peloponnese, Western Greece and the Ionian	https://gem.wiki/Lithos_wind_farm	L908978	G911708	IT0003128367	1	19	19	15	2049	2089	2129
wind	United States	Americas	Northern America	Little Elk Wind Project	1			74	operating	2015		onshore						Enel Green Power		35.1882	-98.8868	exact		Washita County		Oklahoma	https://gem.wiki/Little_Elk_Wind_Project	L906817	G909177	IT0003128367	1	74	74	9	2055	2095	2135
wind	Spain	Europe	Southern Europe	Llança wind farm				10	pre-construction			onshore						Enel Green Power España		42.3646	3.1581	approximate	Llançà	Alt Emporda		Cataluña	https://gem.wiki/Llança_wind_farm	L908000	G910685	IT0003128367	1	10	10	-99	40	80	120
wind	Spain	Europe	Southern Europe	Loma Gorda (Enel Green Power) wind farm	1			24	operating	2019		onshore						Enel Green Power España		41.345	-0.928	exact		Campo de Belchite		Aragon	https://gem.wiki/Loma_Gorda_(Enel_Green_Power)_wind_farm	L912453	G915563	IT0003128367	1	24	24	5	2059	2099	2139
wind	Spain	Europe	Southern Europe	Los Aligars wind farm				33.84	construction	2023		onshore						Totvent 2000 [70%]; Enel Green Power [30%]		40.9828	0.4058	approximate	Prat de Comte				https://gem.wiki/Los_Aligars_wind_farm	L920758	G925573	IT0003128367	0.3	33.84	33.84	1	2063	2103	2143
wind	Spain	Europe	Southern Europe	Los Arcos wind farm				35	operating	2019		onshore						Enel Green Power España		37.0323	-4.9402	approximate	ALmargen		Málaga	Andalucía	https://gem.wiki/Los_Arcos_wind_farm	L913797	G917141	IT0003128367	1	35	35	5	2059	2099	2139
wind	Spain	Europe	Southern Europe	Los Barrancos wind farm				20	operating	2011		onshore						Enel Green Power España		37.0454	-4.8615	approximate	Campillos		Málaga	Andalucía	https://gem.wiki/Los_Barrancos_wind_farm	L911623	G914622	IT0003128367	1	20	20	13	2051	2091	2131
wind	Chile	Americas	Latin America and the Caribbean	Los Buenos Aires wind farm		Parque Eólico Los Buenos Aires		24	operating	2016		onshore						Enel Green Power SPA		-37.526	-72.4975	exact	Los Ángeles	Provincia de Bío-Bío		Biobío Region	https://gem.wiki/Los_Buenos_Aires_wind_farm	L905212	G906837	IT0003128367	1	24	24	8	2056	2096	2136
wind	Spain	Europe	Southern Europe	Los Chopos wind farm				42	pre-construction			onshore						Enel Green Power España		42.3337	-1.7942	approximate	Cintruénigo	La Ribera		Navarra	https://gem.wiki/Los_Chopos_wind_farm	L914367	G917805	IT0003128367	1	42	42	-99	40	80	120
wind	Spain	Europe	Southern Europe	Los Gigantes wind farm				21	operating			onshore						Enel Green Power España		41.098	-0.896	exact		Cuencas Mineras		Aragon	https://gem.wiki/Los_Gigantes_wind_farm	L911895	G914928	IT0003128367	1	21	21	-99	40	80	120
wind	Spain	Europe	Southern Europe	Los Granujales wind farm				24	operating	2011		onshore						Enel Green Power España		36.3207	-5.9628	exact		La Janda	Cádiz	Andalusia	https://gem.wiki/Los_Granujales_wind_farm	L912455	G915565	IT0003128367	1	24	24	13	2051	2091	2131
wind	Spain	Europe	Southern Europe	Los Lances wind farm				11	operating	1999		onshore						Enel Green Power España		36.0139	-5.6069	exact		Campo de Gibraltar	Cádiz	Andalusia	https://gem.wiki/Los_Lances_wind_farm	L908473	G911174	IT0003128367	1	11	11	25	2039	2079	2119
wind	Spain	Europe	Southern Europe	Los Llanos (Enel Green Power, Acciona) wind farm	Ampliación			20	operating	2019		onshore						Acciona Energía [25%]; Enel Green Power España		42.1996	-3.6997	approximate	Hontoria de la Cantera		Burgos	Castilla y León	https://gem.wiki/Los_Llanos_(Enel_Green_Power,_Acciona)_wind_farm	L911624	G914623	IT0003128367	0.75	20	20	5	2059	2099	2139
wind	Spain	Europe	Southern Europe	Los Llanos (Enel Green Powerm Acciona)wind farm	1			38	operating	2008		onshore						Acciona Energía [25%]; Enel Green Power España		36.4469	-5.2858	exact		Costa del Sol Occidental	Malaga	Andalusia	https://gem.wiki/Los_Llanos_(Enel_Green_Powerm_Acciona)wind_farm	L914076	G917460	IT0003128367	0.75	38	38	16	2048	2088	2128
wind	Spain	Europe	Southern Europe	Los Madroñales wind farm				34	operating	2013		onshore						Enel Green Power España		37.0018	-5.0228	approximate	Almargen		Málaga	Andalucía	https://gem.wiki/Los_Madroñales_wind_farm	L913710	G917041	IT0003128367	1	34	34	11	2053	2093	2133
wind	Spain	Europe	Southern Europe	Los Picazuelos wind farm				50	cancelled			onshore						Enel Green Power España		40.4237	-3.6899	approximate	Madrid				https://gem.wiki/Los_Picazuelos_wind_farm	L914981	G918538	IT0003128367	1	50	50	-99	40	80	120
wind	Greece	Europe	Southern Europe	Melia (Enel) wind farm		Μηλια	Kafireas	18	operating	2019		onshore						Enel Green Power Greece SA		38.0601	24.4899	exact		Euboea Regional Unit	Central Greece	Thessaly and Central Greece	https://gem.wiki/Melia_(Enel)_wind_farm	L911325	G914291	IT0003128367	1	18	18	5	2059	2099	2139
wind	Spain	Europe	Southern Europe	Menaute wind farm				37	operating			onshore						Enel Green Power España		37.0474	-4.9177	exact		Guadalteba	Malaga	Andalusia	https://gem.wiki/Menaute_wind_farm	L914001	G917375	IT0003128367	1	37	37	-99	40	80	120
wind	Brazil	Americas	Latin America and the Caribbean	Modelo wind farm	1	Complexo Eólico Modelo		31	operating	2014		onshore						Enel Green Power Brasil Participações LTDA		-5.4308	-35.8931	exact	João Câmara		Região Geográfica Intermediária de Natal	Rio Grande do Norte	https://gem.wiki/Modelo_wind_farm	L905203	G906810	IT0003128367	1	57		10	2054	2094	2134
wind	Brazil	Americas	Latin America and the Caribbean	Modelo wind farm	2	Complexo Eólico Modelo		26	operating	2014		onshore						Enel Green Power Brasil Participações LTDA		-5.4144	-35.9001	exact	João Câmara		Região Geográfica Intermediária de Natal	Rio Grande do Norte	https://gem.wiki/Modelo_wind_farm	L905203	G906811	IT0003128367	1	57	57	10	2054	2094	2134
wind	Romania	Europe	Eastern Europe	Moldova Noua wind farm	1		Sfanta Elena	48	operating	2012		onshore						Enel Green Power Romania SRL		44.6785	21.7114	approximate	Santa Elena	Coronini		Caras Severin	https://gem.wiki/Moldova_Noua_wind_farm	L914766	G918267	IT0003128367	1	48	48	12	2052	2092	2132
wind	Greece	Europe	Southern Europe	Monasteri wind farm	2	Μοναστηρι II	Monastiri II	11	operating	2004		onshore						Enel Green Power Greece SA		41.2022	25.7819	exact		Rodopi Regional Unit	Eastern Macedonia and Thrace	Macedonia and Thrace	https://gem.wiki/Monasteri_wind_farm	L908375	G911073	IT0003128367	1	11	11	20	2044	2084	2124
wind	Spain	Europe	Southern Europe	Montargull wind farm	Ampliación			14	operating			onshore						Enel Green Power España; Elawan Energy		41.5536	1.3745	exact	Llorac	Conca de Barberà	Tarragona	Catalonia	https://gem.wiki/Montargull_wind_farm	L909955	G916585	IT0003128367	0.5	14	14	-99	40	80	120
wind	Brazil	Americas	Latin America and the Caribbean	Morro Do Chapeu 3 wind farm	3	Complexo Eólico Morro do Chapeu 3		100	announced			onshore						Enel Green Power Brasil Participações LTDA		-11.5001	-41.3001	approximate	Morro do Chapeu			Bahia	https://gem.wiki/Morro_Do_Chapeu_3_wind_farm	L905204	G906812	IT0003128367	1	100	100	-99	40	80	120
wind	Brazil	Americas	Latin America and the Caribbean	Morro Do Chapéu Sul 2 wind farm	Ventos de Santa Esperança 08	Parque Eólico Morro do Chapéu Sul 2		25	operating	2021		onshore						Enel Green Power Brasil Participações LTDA		-11.5869	-41.339	exact	Morro do Chapéu		Região Geográfica Intermediária de Irecê	Bahia	https://gem.wiki/Morro_Do_Chapéu_Sul_2_wind_farm	L905205	G906813	IT0003128367	1	352		3	2061	2101	2141
wind	Brazil	Americas	Latin America and the Caribbean	Morro Do Chapéu Sul 2 wind farm	Ventos de Santa Esperança 13	Parque Eólico Morro do Chapéu Sul 2		34	operating	2021		onshore						Enel Green Power Brasil Participações LTDA		-11.5834	-41.3568	exact	Morro do Chapéu		Região Geográfica Intermediária de Irecê	Bahia	https://gem.wiki/Morro_Do_Chapéu_Sul_2_wind_farm	L905205	G906814	IT0003128367	1	352		3	2061	2101	2141
wind	Brazil	Americas	Latin America and the Caribbean	Morro Do Chapéu Sul 2 wind farm	Ventos de Santa Esperança 17	Parque Eólico Morro do Chapéu Sul 2		42	operating	2021		onshore						Enel Green Power Brasil Participações LTDA		-11.508	-41.2946	exact	Morro do Chapéu		Região Geográfica Intermediária de Irecê	Bahia	https://gem.wiki/Morro_Do_Chapéu_Sul_2_wind_farm	L905205	G906817	IT0003128367	1	352		3	2061	2101	2141
wind	Brazil	Americas	Latin America and the Caribbean	Morro Do Chapéu Sul 2 wind farm	Ventos de Santa Esperança 21	Parque Eólico Morro do Chapéu Sul 2		46	operating	2021		onshore						Enel Green Power Brasil Participações LTDA		-11.4992	-41.2911	exact	Morro do Chapéu		Região Geográfica Intermediária de Irecê	Bahia	https://gem.wiki/Morro_Do_Chapéu_Sul_2_wind_farm	L905205	G906818	IT0003128367	1	352		3	2061	2101	2141
wind	Brazil	Americas	Latin America and the Caribbean	Morro Do Chapéu Sul 2 wind farm	Ventos de Santa Esperança 22	Parque Eólico Morro do Chapéu Sul 2		46	operating	2021		onshore						Enel Green Power Brasil Participações LTDA		-11.5169	-41.2801	exact	Morro do Chapéu		Região Geográfica Intermediária de Irecê	Bahia	https://gem.wiki/Morro_Do_Chapéu_Sul_2_wind_farm	L905205	G906819	IT0003128367	1	352		3	2061	2101	2141
wind	Brazil	Americas	Latin America and the Caribbean	Morro Do Chapéu Sul 2 wind farm	Ventos de Santa Esperança 25	Parque Eólico Morro do Chapéu Sul 2		25	operating	2021		onshore						Enel Green Power Brasil Participações LTDA		-11.559	-41.3301	exact	Morro do Chapéu		Região Geográfica Intermediária de Irecê	Bahia	https://gem.wiki/Morro_Do_Chapéu_Sul_2_wind_farm	L905205	G906820	IT0003128367	1	352		3	2061	2101	2141
wind	Brazil	Americas	Latin America and the Caribbean	Morro Do Chapéu Sul 2 wind farm	Ventos de Santa Esperança 26	Parque Eólico Morro do Chapéu Sul 2		46	operating	2021		onshore						Enel Green Power Brasil Participações LTDA		-11.5261	-41.3317	exact	Morro do Chapéu		Região Geográfica Intermediária de Irecê	Bahia	https://gem.wiki/Morro_Do_Chapéu_Sul_2_wind_farm	L905205	G906821	IT0003128367	1	352		3	2061	2101	2141
wind	Brazil	Americas	Latin America and the Caribbean	Morro Do Chapéu Sul 2 wind farm	Ventos de Santa Esperança 15	Parque Eólico Morro do Chapéu Sul 2		46	operating	2022		onshore						Enel Green Power Brasil Participações LTDA		-11.5583	-41.3017	exact	Morro do Chapéu		Região Geográfica Intermediária de Irecê	Bahia	https://gem.wiki/Morro_Do_Chapéu_Sul_2_wind_farm	L905205	G906815	IT0003128367	1	352		2	2062	2102	2142
wind	Brazil	Americas	Latin America and the Caribbean	Morro Do Chapéu Sul 2 wind farm	Ventos de Santa Esperança 16	Parque Eólico Morro do Chapéu Sul 2		42	operating	2022		onshore						Enel Green Power Brasil Participações LTDA		-11.5306	-41.3202	exact	Morro do Chapéu		Região Geográfica Intermediária de Irecê	Bahia	https://gem.wiki/Morro_Do_Chapéu_Sul_2_wind_farm	L905205	G906816	IT0003128367	1	352	352	2	2062	2102	2142
wind	Brazil	Americas	Latin America and the Caribbean	Morro Do Chapéu Sul wind farm	Boa Vista da Lagoinha	Parque Eólico Morro do Chapéu Sul		30	operating	2018		onshore						Enel Green Power Brasil Participações LTDA		-11.7606	-41.3898	exact	Morro do Chapéu		Região Geográfica Intermediária de Irecê	Bahia	https://gem.wiki/Morro_Do_Chapéu_Sul_wind_farm	L905206	G906822	IT0003128367	1	172		6	2058	2098	2138
wind	Brazil	Americas	Latin America and the Caribbean	Morro Do Chapéu Sul wind farm	Ventos da Santa Dulce	Parque Eólico Morro do Chapéu Sul		28	operating	2018		onshore						Enel Green Power Brasil Participações LTDA		-11.5985	-41.3394	exact	Morro do Chapéu		Região Geográfica Intermediária de Irecê	Bahia	https://gem.wiki/Morro_Do_Chapéu_Sul_wind_farm	L905206	G906826	IT0003128367	1	172		6	2058	2098	2138
wind	Brazil	Americas	Latin America and the Caribbean	Morro Do Chapéu Sul wind farm	Ventos da Santa Esperança	Parque Eólico Morro do Chapéu Sul		28	operating	2018		onshore						Enel Green Power Brasil Participações LTDA		-11.6075	-41.3157	exact	Morro do Chapéu		Região Geográfica Intermediária de Irecê	Bahia	https://gem.wiki/Morro_Do_Chapéu_Sul_wind_farm	L905206	G906827	IT0003128367	1	172		6	2058	2098	2138
wind	Brazil	Americas	Latin America and the Caribbean	Morro Do Chapéu Sul wind farm	Ventos do Santo Abraao	Parque Eólico Morro do Chapéu Sul		28	operating	2018		onshore						Enel Green Power Brasil Participações LTDA		-11.6249	-41.3521	exact	Morro do Chapéu		Região Geográfica Intermediária de Irecê	Bahia	https://gem.wiki/Morro_Do_Chapéu_Sul_wind_farm	L905206	G906823	IT0003128367	1	172		6	2058	2098	2138
wind	Brazil	Americas	Latin America and the Caribbean	Morro Do Chapéu Sul wind farm	Ventos do São Mário	Parque Eólico Morro do Chapéu Sul		30	operating	2018		onshore						Enel Green Power Brasil Participações LTDA		-11.5874	-41.2285	exact	Morro do Chapéu		Região Geográfica Intermediária de Irecê	Bahia	https://gem.wiki/Morro_Do_Chapéu_Sul_wind_farm	L905206	G906824	IT0003128367	1	172		6	2058	2098	2138
wind	Brazil	Americas	Latin America and the Caribbean	Morro Do Chapéu Sul wind farm	Ventos do São Paulo	Parque Eólico Morro do Chapéu Sul		28	operating	2018		onshore						Enel Green Power Brasil Participações LTDA		-11.5787	-41.3034	exact	Morro do Chapéu		Região Geográfica Intermediária de Irecê	Bahia	https://gem.wiki/Morro_Do_Chapéu_Sul_wind_farm	L905206	G906825	IT0003128367	1	172	172	6	2058	2098	2138
wind	Peru	Americas	Latin America and the Caribbean	Mórrope wind farm		Parque Eólico Mórrope		224	pre-construction	2025		onshore						Enel Green Power SPA		-6.7088	-79.9062	approximate				Lambayeque	https://gem.wiki/Mórrope_wind_farm	L916576	G920597	IT0003128367	1	224	224	-1	2065	2105	2145
wind	Spain	Europe	Southern Europe	Motilla wind farm			Motilla de Palancar	51	operating	2021		onshore						Enel Green Power España		39.5619	-1.9172	exact			Cuenca	Castile-La Mancha	https://gem.wiki/Motilla_wind_farm	L915107	G918705	IT0003128367	1	51	51	3	2061	2101	2141
wind	United States	Americas	Northern America	Mountrail Wind Project	1			300	pre-construction			onshore						Enel Green Power		48.2303	-102.36	approximate		Mountrail County		North Dakota	https://gem.wiki/Mountrail_Wind_Project	L907584	G910221	IT0003128367	1	300	300	-99	40	80	120
wind	Spain	Europe	Southern Europe	Muniesa wind farm				47	operating	2019		onshore						Enel Green Power España		41.099	-0.717	exact		Cuencas Mineras		Aragon	https://gem.wiki/Muniesa_wind_farm	L914644	G918125	IT0003128367	1	47	47	5	2059	2099	2139
wind	Peru	Americas	Latin America and the Caribbean	Muyu wind farm		Parque Eólico Muyu	Prada	217	operating	2023		onshore						Enel Green Power SPA		-15.4315	-75.0456	exact	Marcona		Nazca	Arequipa	https://gem.wiki/Muyu_wind_farm	L905190	G906753	IT0003128367	1	217	217	1	2063	2103	2143
wind	Spain	Europe	Southern Europe	Navas Del Marqués wind farm				11	operating	2002		onshore						Enel Green Power España		40.6401	-4.3801	exact			Ávila	Castile and León	https://gem.wiki/Navas_Del_Marqués_wind_farm	L908487	G911188	IT0003128367	1	11	11	22	2042	2082	2122
wind	Spain	Europe	Southern Europe	Navazuelo wind farm				17	operating	2002		onshore						Enel Green Power España		40.6301	-4.3501	exact			Ávila	Castile and León	https://gem.wiki/Navazuelo_wind_farm	L910858	G913768	IT0003128367	1	17	17	22	2042	2082	2122
wind	United States	Americas	Northern America	North Shaokatan wind farm	1		Autumn Hills LLC	12	operating	2000		onshore						Enel Green Power		44.4261	-96.4261	exact		Lincoln County		Minnesota	https://gem.wiki/North_Shaokatan_wind_farm	L906318	G908583	IT0003128367	1	12	12	24	2040	2080	2120
wind	South Africa	Africa	Sub-Saharan Africa	Nxuba wind farm	1			139	operating	2020		onshore						Enel Green Power		-32.7407	25.9459	exact	Blue Crane Route Local Municipality	Sarah Baartman District Municipality		Eastern Cape	https://gem.wiki/Nxuba_wind_farm	L900020	G900022	IT0003128367	1	139	139	4	2060	2100	2140
wind	United States	Americas	Northern America	Open Range Wind Project	1			150	shelved			onshore						Enel Green Power		46.465	-99.4502	approximate		Logan County		North Dakota	https://gem.wiki/Open_Range_Wind_Project	L907218	G909731	IT0003128367	1	150		-99	40	80	120
wind	United States	Americas	Northern America	Origin wind farm	1			150	operating	2014		onshore						Enel Green Power		34.4686	-97.3027	exact		Murray County		Oklahoma	https://gem.wiki/Origin_wind_farm	L907219	G909732	IT0003128367	1	150	150	10	2054	2094	2134
wind	Spain	Europe	Southern Europe	Os Corvos wind farm				10	operating	1999		onshore						Enel Green Power España		43.6901	-7.9601	exact		Ferrol		Galicia	https://gem.wiki/Os_Corvos_wind_farm	L908081	G910769	IT0003128367	1	10	10	25	2039	2079	2119
wind	United States	Americas	Northern America	Osage wind farm	1			150	operating	2015		onshore						Enel Green Power		36.7224	-96.6613	exact		Osage County		Oklahoma	https://gem.wiki/Osage_wind_farm	L907233	G909750	IT0003128367	1	150	150	9	2055	2095	2135
wind	South Africa	Africa	Sub-Saharan Africa	Oyster Bay wind farm	1			148	operating	2021		onshore						Enel Green Power		-34.1115	24.6347	exact	Kouga Local Municipality	Sarah Baartman District Municipality		Eastern Cape	https://gem.wiki/Oyster_Bay_wind_farm	L900019	G900021	IT0003128367	1	148	148	3	2061	2101	2141
wind	Spain	Europe	Southern Europe	Padul wind farm				18	operating	2012		onshore						Enel Green Power España		37.0042	-3.6924	exact		Comarca del Valle de Lecrín	Granada	Andalusia	https://gem.wiki/Padul_wind_farm	L911187	G914136	IT0003128367	1	18	18	12	2052	2092	2132
wind	Greece	Europe	Southern Europe	Paliopergos wind farm		Παλιοπυργος		14	operating	2020		onshore						Enel Green Power Greece SA		38.021	24.567	exact		Euboea Regional Unit	Central Greece	Thessaly and Central Greece	https://gem.wiki/Paliopergos_wind_farm	L909765	G912547	IT0003128367	1	14	14	4	2060	2100	2140
wind	Brazil	Americas	Latin America and the Caribbean	Palmas Dos Ventos wind farm	1	Parque Eólico Palmas dos Ventos		150	cancelled			onshore						Enel Green Power Brasil Participações LTDA		-11.1879	-38.003	approximate	Tobias Barreto			Sergipe	https://gem.wiki/Palmas_Dos_Ventos_wind_farm	L905207	G906828	IT0003128367	1	150	150	-99	40	80	120
wind	Mexico	Americas	Latin America and the Caribbean	Palo Alto wind farm (Mexico)	Chinampas	Parque Eólico Palo Alto		129	operating	2017		onshore						Enel Green Power SPA		21.8661	-101.59	approximate	Ojuelos			Jalisco	https://gem.wiki/Palo_Alto_wind_farm_(Mexico)	L905223	G906854	IT0003128367	1	129	129	7	2057	2097	2137
wind	Argentina	Americas	Latin America and the Caribbean	Pampa (Enel) wind farm		Parque Eólico Pampa (Enel)		100	cancelled			onshore						Enel Green Power SPA		-45.7798	-67.6719	approximate	Comodoro Rivadavia			Chubut Province	https://gem.wiki/Pampa_(Enel)_wind_farm	L905211	G906836	IT0003128367	1	100	100	-99	40	80	120
wind	Greece	Europe	Southern Europe	Panayia Soumela wind farm		Παναγια Σουμελα	Panaghia Soumela	14	operating	2011		onshore						Enel Green Power Greece SA		40.4212	22.1075	exact		Imathia Regional Unit	Central Macedonia	Macedonia and Thrace	https://gem.wiki/Panayia_Soumela_wind_farm	L909966	G912771	IT0003128367	1	14	14	13	2051	2091	2131
wind	Spain	Europe	Southern Europe	Paradela wind farm				12	operating	2019		onshore						Enel Green Power España		42.7647	-7.5701	approximate	Paradela		Lugo	Galicia	https://gem.wiki/Paradela_wind_farm	L909156	G911895	IT0003128367	1	12	12	5	2059	2099	2139
wind	Colombia	Americas	Latin America and the Caribbean	Patomana wind farm		Parque Eólico Patomana		200	cancelled			onshore						Enel Green Power SPA		11.9917	-71.6769	approximate	Uribia			La Guajira	https://gem.wiki/Patomana_wind_farm	L905185	G906748	IT0003128367	1	200	200	-99	40	80	120
wind	Spain	Europe	Southern Europe	Pena Armada wind farm				21	operating	2003		onshore						Enel Green Power España		42.2501	-7.3833	exact	Chandrexa de Queixa	Terra de Trives		Galicia	https://gem.wiki/Pena_Armada_wind_farm	L911919	G914957	IT0003128367	1	21	21	21	2043	2083	2123
wind	Spain	Europe	Southern Europe	Peña Del Gato wind farm				50	operating	2021		onshore						Enel Green Power España		42.6642	-6.217	exact		El Bierzo	León	Castile and León	https://gem.wiki/Peña_Del_Gato_wind_farm	L915019	G918585	IT0003128367	1	50	50	3	2061	2101	2141
wind	Spain	Europe	Southern Europe	Pena Forcada wind farm				34	operating	2003		onshore						Enel Green Power España		43.1501	-9.201	exact		Terra de Soneira		Galicia	https://gem.wiki/Pena_Forcada_wind_farm	L913721	G917052	IT0003128367	1	34	34	21	2043	2083	2123
wind	Spain	Europe	Southern Europe	Pena Ventosa wind farm	1			45	operating	2006		onshore						Enel Green Power España		43.655	-7.6691	exact		A Mariña Occidental		Galicia	https://gem.wiki/Pena_Ventosa_wind_farm	L914558	G918025	IT0003128367	1	45	45	18	2046	2086	2126
wind	Spain	Europe	Southern Europe	Peña wind farm	2			18	operating	2009		onshore						Enel Green Power España		41.0152	-1.8525	exact			Guadalajara	Castile-La Mancha	https://gem.wiki/Peña_wind_farm	L910618	G914140	IT0003128367	1	18	18	15	2049	2089	2129
wind	Spain	Europe	Southern Europe	Pesur wind farm	1			20	retired	1992		onshore						Enel Green Power España		36.0128	-5.6049	approximate	Tarifa		Cádiz	Andalucía	https://gem.wiki/Pesur_wind_farm	L911663	G917824	IT0003128367	1	20	20	32	2032	2072	2112
wind	Spain	Europe	Southern Europe	Picazo wind farm				14	operating	2009		onshore						Enel Green Power España		41.0752	-1.8524	exact	Milmarcos		Guadalajara	Castile-La Mancha	https://gem.wiki/Picazo_wind_farm	L909973	G912778	IT0003128367	1	14	14	15	2049	2089	2129
wind	Greece	Europe	Southern Europe	Platanistos wind farm		Πλατανιστος	Kafireas	30	operating	2019		onshore						Enel Green Power Greece SA		38.0236	24.4958	exact		Euboea Regional Unit	Central Greece	Thessaly and Central Greece	https://gem.wiki/Platanistos_wind_farm	L913195	G916427	IT0003128367	1	30	30	5	2059	2099	2139
wind	Greece	Europe	Southern Europe	Platanos (Enel) wind farm		Πλατανος	Kafireas	14	operating	2019		onshore						Enel Green Power Greece SA		38.0946	24.449	exact		Euboea Regional Unit	Central Greece	Thessaly and Central Greece	https://gem.wiki/Platanos_(Enel)_wind_farm	L909769	G912551	IT0003128367	1	14	14	5	2059	2099	2139
wind	Spain	Europe	Southern Europe	Pousadoiro-Fonesca wind farm	1		Pousadoiro	24	operating	2008		onshore						Enel Green Power España; Elawan Energy		43.3089	-7.2498	exact	A Pontenova	A Mariña Oriental		Galicia	https://gem.wiki/Pousadoiro-Fonesca_wind_farm	L912499	G915616	IT0003128367	0.5	24	24	16	2048	2088	2128
wind	United States	Americas	Northern America	Prairie Rose wind farm	1			200	operating	2012		onshore						Enel Green Power [51%]; General Electric [49%]		43.8165	-96.3079	exact		Rock County		Minnesota	https://gem.wiki/Prairie_Rose_wind_farm	L907352	G909904	IT0003128367	0.51	200	200	12	2052	2092	2132
wind	Spain	Europe	Southern Europe	Primoral wind farm				35	operating	2019		onshore						Enel Green Power España		41.656	-0.697	exact	Villamayor de Gállego	Zaragoza		Aragon	https://gem.wiki/Primoral_wind_farm	L913814	G917161	IT0003128367	1	35	35	5	2059	2099	2139
wind	Spain	Europe	Southern Europe	Pucheruelo wind farm				23	operating	2012		onshore						Enel Green Power España		40.4785	-4.6818	approximate	San Juan de la Nava		Ávila	Castilla y León	https://gem.wiki/Pucheruelo_wind_farm	L912262	G915350	IT0003128367	1	23	23	12	2052	2092	2132
wind	United States	Americas	Northern America	Ranchland Wind Project	1			115	operating	2023		onshore						Enel Green Power		32.2647	-99.1972	exact	Cisco	Callahan County		Texas	https://gem.wiki/Ranchland_Wind_Project	L907084	G909538	IT0003128367	1	263		1	2063	2103	2143
wind	United States	Americas	Northern America	Ranchland Wind Project	2			148	operating	2023		onshore						Enel Green Power		32.307	-99.165	exact	Cisco	Callahan County		Texas	https://gem.wiki/Ranchland_Wind_Project	L907084	G909669	IT0003128367	1	263	263	1	2063	2103	2143
wind	United States	Americas	Northern America	Rattlesnake Creek Wind Project	1			318	operating	2018		onshore						Enel Green Power		42.4071	-96.8094	exact		Dixon County		Nebraska	https://gem.wiki/Rattlesnake_Creek_Wind_Project	L907611	G910252	IT0003128367	1	318	318	6	2058	2098	2138
wind	United States	Americas	Northern America	Red Dirt Wind Project	1			299	operating	2017		onshore						Enel Green Power		36.0368	-97.7584	exact		Kingfisher County		Oklahoma	https://gem.wiki/Red_Dirt_Wind_Project	L907559	G910195	IT0003128367	1	299	299	7	2057	2097	2137
wind	Chile	Americas	Latin America and the Caribbean	Renaico wind farm	2 Las Viñas	Parque Eólico Renaico		144	operating	2023		onshore						Enel Green Power SPA		-38.0932	-72.1469	approximate	Araucanía			Araucanía	https://gem.wiki/Renaico_wind_farm	L905213	G927166	IT0003128367	1	376		1	2063	2103	2143
wind	Chile	Americas	Latin America and the Caribbean	Renaico wind farm	2 Puelche	Parque Eólico Renaico	Puelche	144	operating	2023		onshore						Enel Green Power SPA		-38.0932	-72.1469	approximate	Araucanía			Araucanía	https://gem.wiki/Renaico_wind_farm	L905213	G927167	IT0003128367	1	376		1	2063	2103	2143
wind	Chile	Americas	Latin America and the Caribbean	Renaico wind farm	1	Parque Eólico Renaico		88	operating			onshore						Enel Green Power SPA		-37.7245	-72.5759	exact		Provincia de Malleco		Araucanía Region	https://gem.wiki/Renaico_wind_farm	L905213	G906838	IT0003128367	1	376	376	-99	40	80	120
wind	Canada	Americas	Northern America	Riverview wind farm				105	operating	2020		onshore						Enel Green Power SPA		49.4512	-113.948	approximate	Pincher Creek No. 9			Alberta	https://gem.wiki/Riverview_wind_farm	L907061	G909498	IT0003128367	1	105	105	4	2060	2100	2140
wind	United States	Americas	Northern America	Rock Creek wind farm	1			300	operating	2017		onshore						Enel Green Power		40.4775	-95.2686	exact		Atchison County		Missouri	https://gem.wiki/Rock_Creek_wind_farm	L907589	G910226	IT0003128367	1	300	300	7	2057	2097	2137
wind	United States	Americas	Northern America	Rockhaven Wind Project	1			140	operating	2021		onshore						Enel Green Power		34.4137	-97.3279	exact	Hennepin	Garvin County		Oklahoma	https://gem.wiki/Rockhaven_Wind_Project	L907153	G909642	IT0003128367	1	140	140	3	2061	2101	2141
wind	United States	Americas	Northern America	Rocky Ridge Wind Project	1			149	operating	2012		onshore						Gulf Pacific Power [80%]; Enel Green Power SPA [20%]		35.1803	-98.9782	exact		Washita County		Oklahoma	https://gem.wiki/Rocky_Ridge_Wind_Project	L907179	G909677	IT0003128367	0.2	149	149	12	2052	2092	2132
wind	Russia	Europe	Eastern Europe	Rodnikovsky wind farm		Родниковская ВЭС		71	cancelled			onshore						Enel Russia		44.9928	43.368	approximate		Stavropol Krai	North Caucasian Federal District		https://gem.wiki/Rodnikovsky_wind_farm	L905914	G908092	IT0003128367	1	71	71	-99	40	80	120
wind	United States	Americas	Northern America	Rolling Farms Wind Project	1			400	pre-construction			onshore						Enel Green Power		39.4201	-89.4556	approximate	Morrisonville	Christian County		Illinois	https://gem.wiki/Rolling_Farms_Wind_Project	L907648	G910296	IT0003128367	1	400	400	-99	40	80	120
wind	United States	Americas	Northern America	Ruthton wind farm	1			16	operating	2001		onshore						Northern Alternative Energy; Enel Green Power		44.2048	-96.1988	exact		Pipestone County		Minnesota	https://gem.wiki/Ruthton_wind_farm	L906361	G908628	IT0003128367	0.5	16	16	23	2041	2081	2121
wind	Romania	Europe	Eastern Europe	Salbatica wind farm	1			70	operating	2011		onshore						Enel Green Power SPA		45.0251	28.8558	exact		Tulcea			https://gem.wiki/Salbatica_wind_farm	L915428	G919082	IT0003128367	1	140		13	2051	2091	2131
wind	Romania	Europe	Eastern Europe	Salbatica wind farm	2			70	operating	2011		onshore						Enel Green Power SPA		45.9852	24.6859	approximate	Tulcea	Tulcea County		Dobruja	https://gem.wiki/Salbatica_wind_farm	L915428	G919083	IT0003128367	1	140	140	13	2051	2091	2131
wind	Mexico	Americas	Latin America and the Caribbean	Salitrillos wind farm		Parque Eólico Salitrillos		104	operating	2019		onshore						Enel Green Power SPA		25.9008	-98.4705	exact		Municipio de Reynosa		Tamaulipas	https://gem.wiki/Salitrillos_wind_farm	L905224	G906855	IT0003128367	1	104	104	5	2059	2099	2139
wind	Spain	Europe	Southern Europe	San Cristóbal De Aguilón wind farm				50	operating	2011		onshore						Enel Green Power España; Endesa		41.308	-1.002	exact		Campo de Cariñena		Aragon	https://gem.wiki/San_Cristóbal_De_Aguilón_wind_farm	L915042	G918611	IT0003128367	0.5	50	50	13	2051	2091	2131
wind	Spain	Europe	Southern Europe	San Francisco De Borja wind farm				24	operating	2021		onshore						Enel Green Power España		41.893	-1.509	exact	Borja	Campo de Borja		Aragon	https://gem.wiki/San_Francisco_De_Borja_wind_farm	L912515	G915635	IT0003128367	1	24	24	3	2061	2101	2141
wind	Spain	Europe	Southern Europe	San Pedro Alacon wind farm			San Pedro de Alacon	40	operating	2019		onshore						Enel Green Power España		41.062	-0.734	exact		Cuencas Mineras		Aragon	https://gem.wiki/San_Pedro_Alacon_wind_farm	L914250	G917663	IT0003128367	1	40	40	5	2059	2099	2139
wind	Spain	Europe	Southern Europe	Sant Joan wind farm				49	pre-construction			onshore						Enel Green Power España		41.4401	0.8348	approximate	la Pobla de Cérvoles	Garrigues		Cataluña	https://gem.wiki/Sant_Joan_wind_farm	L914815	G918332	IT0003128367	1	49	49	-99	40	80	120
wind	Spain	Europe	Southern Europe	Santo Domingo De La Luna wind farm				23	operating	2019		onshore						Enel Green Power España		42.067	-0.882	exact	Sierra de Luna	Cinco Villas		Aragon	https://gem.wiki/Santo_Domingo_De_La_Luna_wind_farm	L912269	G915358	IT0003128367	1	23	23	5	2059	2099	2139
wind	Spain	Europe	Southern Europe	Sasoplano wind farm			Almudévar, Saso Plano	36	operating	2003		onshore						Enel Green Power España		42.136	-0.592	exact		Hoya de Huesca / Plana de Uesca		Aragon	https://gem.wiki/Sasoplano_wind_farm	L913936	G917300	IT0003128367	1	36	36	21	2043	2083	2123
wind	Brazil	Americas	Latin America and the Caribbean	Serra Azul wind farm	Dois Riachos	Complexo Eólico Serra Azul		30	operating	2015		onshore						Enel Green Power Brasil Participações LTDA		-11.8225	-41.4588	exact	Cafarnaum		Região Geográfica Intermediária de Irecê	Bahia	https://gem.wiki/Serra_Azul_wind_farm	L905208	G906829	IT0003128367	1	118		9	2055	2095	2135
wind	Brazil	Americas	Latin America and the Caribbean	Serra Azul wind farm	Damascena	Complexo Eólico Serra Azul		30	operating	2016		onshore						Enel Green Power Brasil Participações LTDA		-11.8567	-41.4742	exact	Cafarnaum		Região Geográfica Intermediária de Irecê	Bahia	https://gem.wiki/Serra_Azul_wind_farm	L905208	G906830	IT0003128367	1	118		8	2056	2096	2136
wind	Brazil	Americas	Latin America and the Caribbean	Serra Azul wind farm	Esperança	Complexo Eólico Serra Azul		28	operating	2017		onshore						Enel Green Power Brasil Participações LTDA		-11.8616	-41.4161	exact	Bonito		Região Geográfica Intermediária de Irecê	Bahia	https://gem.wiki/Serra_Azul_wind_farm	L905208	G906831	IT0003128367	1	118		7	2057	2097	2137
wind	Brazil	Americas	Latin America and the Caribbean	Serra Azul wind farm	Maniçoba	Complexo Eólico Serra Azul		30	operating	2017		onshore						Enel Green Power Brasil Participações LTDA		-11.8934	-41.4583	exact	Sento Sé		Região Geográfica Intermediária de Irecê	Bahia	https://gem.wiki/Serra_Azul_wind_farm	L905208	G906832	IT0003128367	1	118	118	7	2057	2097	2137
wind	Portugal	Europe	Southern Europe	Serra Da Capucha wind farm	1		Parque Eólico Serra da Capucha	10	operating	2005		onshore						Enel Green Power SPA		39.0601	-9.2601	exact	Torres Vedras	Lisbon			https://gem.wiki/Serra_Da_Capucha_wind_farm	L908166	G910857	IT0003128367	1	10	10	19	2045	2085	2125
wind	Spain	Europe	Southern Europe	Serra Da Loba wind farm	Amplicación		Pena Revolta	14	operating	2008		onshore						Enel Green Power España; Elawan Energy		43.3333	-8.0167	exact	Monfero	O Eume		Galicia	https://gem.wiki/Serra_Da_Loba_wind_farm	L910011	G912822	IT0003128367	0.5	14	14	16	2048	2088	2128
wind	Spain	Europe	Southern Europe	Serra Das Penas wind farm				42	operating	2019		onshore						Enel Green Power España		42.7647	-7.5701	approximate	Paradela		Lugo	Galicia	https://gem.wiki/Serra_Das_Penas_wind_farm	L914397	G917842	IT0003128367	1	42	42	5	2059	2099	2139
wind	United States	Americas	Northern America	Seven Cowboy Wind Project	1			300	operating	2023		onshore						Enel Green Power		35.292	-99.101	exact	Rocky	Washita County		Oklahoma	https://gem.wiki/Seven_Cowboy_Wind_Project	L907591	G910228	IT0003128367	1	300	300	1	2063	2103	2143
wind	Spain	Europe	Southern Europe	Sierra Costera wind farm	2			41	operating	2007		onshore						Enel Green Power España		40.689	-0.884	exact		Comunidad de Teruel		Aragon	https://gem.wiki/Sierra_Costera_wind_farm	L914303	G917730	IT0003128367	1	90		17	2047	2087	2127
wind	Spain	Europe	Southern Europe	Sierra Costera wind farm	1			49	operating	2019		onshore						Enel Green Power España		40.719	-0.946	exact		Comunidad de Teruel		Aragon	https://gem.wiki/Sierra_Costera_wind_farm	L914303	G918337	IT0003128367	1	90	90	5	2059	2099	2139
wind	Spain	Europe	Southern Europe	Sierra De La Virgen wind farm				29	operating	2003		onshore						Enel Green Power España		41.457	-1.6401	exact		Comunidad de Calatayud		Aragon	https://gem.wiki/Sierra_De_La_Virgen_wind_farm	L913149	G916376	IT0003128367	1	29	29	21	2043	2083	2123
wind	Spain	Europe	Southern Europe	Sierra De Oriche wind farm			Oriche	14	operating	2020		onshore						Enel Green Power España		40.982	-1.012	exact	Allueva	Jiloca		Aragon	https://gem.wiki/Sierra_De_Oriche_wind_farm	L910013	G912825	IT0003128367	1	14	14	4	2060	2100	2140
wind	Spain	Europe	Southern Europe	Sierra Del Cortado wind farm	1			18	operating	2003		onshore						Enel Green Power España [60%]; Siemens Gamesa Renewable Energy [40%]		41.7501	-2.1901	exact			Soria	Castile and León	https://gem.wiki/Sierra_Del_Cortado_wind_farm	L910014	G912826	IT0003128367	0.6	32		21	2043	2083	2123
wind	Spain	Europe	Southern Europe	Sierra Del Cortado wind farm	Ampliación			14	operating	2013		onshore						Enel Green Power España		41.7389	-2.1697	exact			Soria	Castile and León	https://gem.wiki/Sierra_Del_Cortado_wind_farm	L910014	G914192	IT0003128367	1	32	32	11	2053	2093	2133
wind	Spain	Europe	Southern Europe	Sierra Del Madero wind farm	1			15	operating	1998		onshore						Enel Green Power España		41.7501	-1.9801	exact	Noviercas		Soria	Castile and León	https://gem.wiki/Sierra_Del_Madero_wind_farm	L910015	G912827	IT0003128367	1	29		26	2038	2078	2118
wind	Spain	Europe	Southern Europe	Sierra Del Madero wind farm	2			14	operating	1998		onshore						Enel Green Power España		41.7501	-2.0003	exact			Soria	Castile and León	https://gem.wiki/Sierra_Del_Madero_wind_farm	L910015	G913241	IT0003128367	1	29	29	26	2038	2078	2118
wind	Chile	Americas	Latin America and the Caribbean	Sierra Gorda wind farm (Chile)		Parque Eólico Sierra Gorda	Sierra Gorda Este	112	operating	2016		onshore						Enel Green Power SPA		-22.886	-69.3172	approximate	Sierra Gorda			Antofagasta	https://gem.wiki/Sierra_Gorda_wind_farm_(Chile)	L905214	G906840	IT0003128367	1	112	112	8	2056	2096	2136
wind	Spain	Europe	Southern Europe	Sierra Pelarda wind farm			Pelarda	14	operating	2019		onshore						Enel Green Power España		40.985	-1.088	exact	Fonfría	Jiloca		Aragon	https://gem.wiki/Sierra_Pelarda_wind_farm	L910016	G912828	IT0003128367	1	14	14	5	2059	2099	2139
wind	United States	Americas	Northern America	Skyview Wind Project	1			260	pre-construction	2024		onshore						Enel Green Power		39.5911	-97.3974	approximate		Cloud County		Kansas	https://gem.wiki/Skyview_Wind_Project	L907522	G910153	IT0003128367	1	260	260	0	2064	2104	2144
wind	United States	Americas	Northern America	Smoky Hills Wind Project	1			101	retired	2008	2020	onshore						Enel Green Power		38.8792	-98.0461	exact		Lincoln County		Kansas	https://gem.wiki/Smoky_Hills_Wind_Project	L907025	G909448	IT0003128367	1	513		16	2048	2088	2128
wind	United States	Americas	Northern America	Smoky Hills Wind Project	2			148	retired	2008	2020	onshore						Enel Green Power		38.9098	-98.1917	exact		Lincoln County		Kansas	https://gem.wiki/Smoky_Hills_Wind_Project	L907025	G909674	IT0003128367	1	513		16	2048	2088	2128
wind	United States	Americas	Northern America	Smoky Hills Wind Project	RP			264	operating	2020		onshore						Enel Green Power		38.8792	-98.0461	exact					https://gem.wiki/Smoky_Hills_Wind_Project	L907025	G927362	IT0003128367	1	513	513	4	2060	2100	2140
wind	United States	Americas	Northern America	Snyder wind farm	1			63	retired	2007	2022	onshore						Enel Green Power		32.7431	-100.754	exact		Scurry County		Texas	https://gem.wiki/Snyder_wind_farm	L906767	G909112	IT0003128367	1	63	63	17	2047	2087	2127
wind	South Africa	Africa	Sub-Saharan Africa	Soetwater wind farm	1			139	operating	2021		onshore						Enel Green Power		-32.754	20.6396	exact	Karoo Hoogland Local Municipality	Namakwa District Municipality		Northern Cape	https://gem.wiki/Soetwater_wind_farm	L900022	G900024	IT0003128367	1	139	139	3	2061	2101	2141
wind	Greece	Europe	Southern Europe	Soros (Enel) wind farm		Σωρος	Soros Evros	12	operating	2003		onshore						Enel Green Power Greece SA		41.0741	25.9541	exact		Evros Regional Unit	Eastern Macedonia and Thrace	Macedonia and Thrace	https://gem.wiki/Soros_(Enel)_wind_farm	L908684	G911397	IT0003128367	1	12	12	21	2043	2083	2123
wind	France	Europe	Western Europe	Sources De La Loire wind farm				18	operating	2011		onshore						Enel SPA		44.7994	4.1276	exact		Ardèche		Auvergne-Rhône-Alpes	https://gem.wiki/Sources_De_La_Loire_wind_farm	L911241	G914201	IT0003128367	1	18	18	13	2051	2091	2131
wind	United States	Americas	Northern America	South Rock Wind Project	1			244	pre-construction			onshore						Enel Green Power		40.3386	-95.3933	approximate	Fairfax	Atchison County		Missouri	https://gem.wiki/South_Rock_Wind_Project	L907489	G910113	IT0003128367	1	244	244	-99	40	80	120
wind	Greece	Europe	Southern Europe	Spelia (Enel) wind farm		Σπηλια	Kafireas	30	operating	2019		onshore						Enel Green Power Greece SA		38.0883	24.4425	exact		Euboea Regional Unit	Central Greece	Thessaly and Central Greece	https://gem.wiki/Spelia_(Enel)_wind_farm	L913202	G916434	IT0003128367	1	30	30	5	2059	2099	2139
wind	Mexico	Americas	Latin America and the Caribbean	Sureste I wind farm	2	Parque Eólico Sureste I		102	operating	2016		onshore						Enel Green Power SPA; Siemens Gamesa Renewable Energy SA		16.5019	-95.059	approximate	Asuncion Ixtaltepec			Oaxaca	https://gem.wiki/Sureste_I_wind_farm	L905226	G906857	IT0003128367	0.5	102	102	8	2056	2096	2136
wind	Chile	Americas	Latin America and the Caribbean	Talinay Oriente wind farm		Parque Eólico Talinay Oriente		90	operating	2013		onshore						Enel Green Power SPA		-30.8431	-71.5734	exact	Ovalle	Provincia de Limarí		Coquimbo Region	https://gem.wiki/Talinay_Oriente_wind_farm	L905215	G906841	IT0003128367	1	90	90	11	2053	2093	2133
wind	Chile	Americas	Latin America and the Caribbean	Talinay Poniente wind farm		Parque Eólico Talinay Poniente		61	operating	2015		onshore						Enel Green Power SPA		-30.8535	-71.5801	approximate	Ovalle			Coquimbo	https://gem.wiki/Talinay_Poniente_wind_farm	L905216	G906842	IT0003128367	1	61	61	9	2055	2095	2135
wind	Chile	Americas	Latin America and the Caribbean	Taltal wind farm		Parque Eólico Taltal		99	operating	2014		onshore						Enel Green Power SPA		-25.4065	-70.4803	approximate	Taltal			Antofagasta	https://gem.wiki/Taltal_wind_farm	L905217	G906843	IT0003128367	1	99	99	10	2054	2094	2134
wind	Romania	Europe	Eastern Europe	Targusor-Zephir wind farm	1		Zephir-I (tagusor)	120	operating	2012		onshore						Enel Green Power SRL (fost ELCOMEX EOL SA)		44.5245	28.3922	approximate				Dobrogea	https://gem.wiki/Targusor-Zephir_wind_farm	L915253	G919516	IT0003128367	1	179		12	2052	2092	2132
wind	Romania	Europe	Eastern Europe	Targusor-Zephir wind farm	2		Zephir-II (balcescu), Nicolae Balcescu - Târguşor	59	operating	2012		onshore						Enel Green Power SRL (fost Târguşor Wind Farm SA)		44.5245	28.3922	approximate				Dobrogea	https://gem.wiki/Targusor-Zephir_wind_farm	L915253	G918879	IT0003128367	1	179	179	12	2052	2092	2132
wind	Spain	Europe	Southern Europe	Terrades wind farm				30	pre-construction			onshore						Enel Green Power España		42.3733	2.9206	approximate	Capmany	Alt Emporda		Cataluña	https://gem.wiki/Terrades_wind_farm	L913382	G916646	IT0003128367	1	30	30	-99	40	80	120
wind	France	Europe	Western Europe	Thouarsais wind farm				12	operating	2008		onshore						Enel SPA		46.9234	-0.3329	exact		Deux-Sèvres		New Aquitaine	https://gem.wiki/Thouarsais_wind_farm	L909289	G912033	IT0003128367	1	12	12	16	2048	2088	2128
wind	United States	Americas	Northern America	Thunder Ranch Wind Project	1		Budweiser Wind Farm	298	operating	2018		onshore						Enel Green Power		36.5706	-97.3031	exact		Noble County		Oklahoma	https://gem.wiki/Thunder_Ranch_Wind_Project	L907549	G910183	IT0003128367	1	298	298	6	2058	2098	2138
wind	Spain	Europe	Southern Europe	Tico wind farm				180	operating	2022		onshore						Enel Green Power España		41.1657	-1.0054	exact	Villar de los Navarros		Zaragosa	Aragón	https://gem.wiki/Tico_wind_farm	L915955	G919709	IT0003128367	1	180	180	2	2062	2102	2142
wind	Romania	Europe	Eastern Europe	Topolog 3 wind farm	1			27	operating	2009		onshore						Enel Green Power Romania SRL		44.7203	28.3828	approximate		Tulcea		Dobruja	https://gem.wiki/Topolog_3_wind_farm	L912938	G916126	IT0003128367	1	27	27	15	2049	2089	2129
wind	Spain	Europe	Southern Europe	Touriñán (Enel Green Power) wind farm			Serra do Moncoso, Touriñán IV	25	operating	2007		onshore						Enel Green Power España		43.2774	-7.9877	exact		Betanzos		Galicia	https://gem.wiki/Touriñán_(Enel_Green_Power)_wind_farm	L912683	G915821	IT0003128367	1	25	25	17	2047	2087	2127
wind	Spain	Europe	Southern Europe	Trebadelo wind farm				55	pre-construction			onshore						Enel Green Power España		42.6527	-6.6232	approximate	El Bierzo		León	Castilla y León	https://gem.wiki/Trebadelo_wind_farm	L915866	G919609	IT0003128367	1	55	55	-99	40	80	120
wind	Colombia	Americas	Latin America and the Caribbean	Tumawind wind farm		Parque Eólico Tumawind	Kuisa	200	pre-construction			onshore						Enel Green Power SPA		11.4354	-72.9002	approximate				La Guajira	https://gem.wiki/Tumawind_wind_farm	L905186	G906749	IT0003128367	1	200	200	-99	40	80	120
wind	Greece	Europe	Southern Europe	Tychero wind farm		Τυχερο		90	pre-construction			onshore						Enel Green Power Greece SA		41.0637	26.3041	exact		Evros Regional Unit	Eastern Macedonia and Thrace	Macedonia and Thrace	https://gem.wiki/Tychero_wind_farm	L920335	G924993	IT0003128367	1	90	90	-99	40	80	120
wind	Spain	Europe	Southern Europe	Valdesamario wind farm	1			24	operating			onshore						Enel Green Power España; URIEL Renewables INC		42.7238	-6.0518	approximate	Riello		León	Castilla y León	https://gem.wiki/Valdesamario_wind_farm	L908540	G915665	IT0003128367	0.5	24	24	-99	40	80	120
wind	Spain	Europe	Southern Europe	Valdihuelo wind farm				16	operating	2011		onshore						Enel Green Power España		40.6723	-4.5222	approximate	Urraca Miguel		Ávila	Castilla y León	https://gem.wiki/Valdihuelo_wind_farm	L910673	G913563	IT0003128367	1	16	16	13	2051	2091	2131
wind	Romania	Europe	Eastern Europe	Valea Nucarilor wind farm	1			70	operating	2011		onshore						Enel Green Power Romania SRL		45.0451	28.9607	exact		Tulcea			https://gem.wiki/Valea_Nucarilor_wind_farm	L915431	G919086	IT0003128367	1	70	70	13	2051	2091	2131
wind	Chile	Americas	Latin America and the Caribbean	Valle De Los Vientos wind farm		Parque Eólico Valle de los Vientos		90	operating	2013		onshore						Enel Green Power SPA		-22.5265	-68.8145	exact	Calama	Provincia de El Loa		Antofagasta Region	https://gem.wiki/Valle_De_Los_Vientos_wind_farm	L905218	G906844	IT0003128367	1	90	90	11	2053	2093	2133
wind	France	Europe	Western Europe	Vallée De L'Arce wind farm				30	operating	2009		onshore						Enel SPA		48.1596	4.4845	exact		Aube		Grand Est	https://gem.wiki/Vallée_De_L'Arce_wind_farm	L913398	G916662	IT0003128367	1	30	30	15	2049	2089	2129
wind	Brazil	Americas	Latin America and the Caribbean	Ventos de Santa Esperança wind farm	1	Parque Eólico Ventos de Santa Esperança		43.4	pre-construction			onshore						Enel Green Power Brasil Participações LTDA		-12.7025	-41.475	approximate				Bahia	https://gem.wiki/Ventos_de_Santa_Esperança_wind_farm	L921814	G927013	IT0003128367	1	142.6		-99	40	80	120
wind	Brazil	Americas	Latin America and the Caribbean	Ventos de Santa Esperança wind farm	3	Parque Eólico Ventos de Santa Esperança		49.6	pre-construction			onshore						Enel Green Power Brasil Participações LTDA		-12.7025	-41.475	approximate				Bahia	https://gem.wiki/Ventos_de_Santa_Esperança_wind_farm	L921814	G927014	IT0003128367	1	142.6		-99	40	80	120
wind	Brazil	Americas	Latin America and the Caribbean	Ventos de Santa Esperança wind farm	7	Parque Eólico Ventos de Santa Esperança		49.6	pre-construction			onshore						Enel Green Power Brasil Participações LTDA		-12.7025	-41.475	approximate				Bahia	https://gem.wiki/Ventos_de_Santa_Esperança_wind_farm	L921814	G927018	IT0003128367	1	142.6	142.6	-99	40	80	120
wind	Brazil	Americas	Latin America and the Caribbean	Ventos de São Roque wind farm	3	Parque Eólico Ventos de São Roque		45.6	construction			onshore						Enel Green Power Brasil Participações LTDA		-8.8822	-41.6225	exact			Região Geográfica Intermediária de São Raimundo Nonato	Piauí	https://gem.wiki/Ventos_de_São_Roque_wind_farm	L916521	G920522	IT0003128367	1	399		-99	40	80	120
wind	Brazil	Americas	Latin America and the Caribbean	Ventos de São Roque wind farm	5	Parque Eólico Ventos de São Roque		45.6	construction			onshore						Enel Green Power Brasil Participações LTDA		-8.8903	-41.5832	exact			Região Geográfica Intermediária de São Raimundo Nonato	Piauí	https://gem.wiki/Ventos_de_São_Roque_wind_farm	L916521	G920523	IT0003128367	1	399		-99	40	80	120
wind	Brazil	Americas	Latin America and the Caribbean	Ventos de São Roque wind farm	6	Parque Eólico Ventos de São Roque		45.6	pre-construction			onshore						Enel Green Power Brasil Participações LTDA		-8.9439	-41.5718	exact			Região Geográfica Intermediária de São Raimundo Nonato	Piauí	https://gem.wiki/Ventos_de_São_Roque_wind_farm	L916521	G920524	IT0003128367	1	399		-99	40	80	120
wind	Brazil	Americas	Latin America and the Caribbean	Ventos de São Roque wind farm	7	Parque Eólico Ventos de São Roque		45.6	pre-construction			onshore						Enel Green Power Brasil Participações LTDA		-8.9453	-41.5451	exact		Região Administrativa Integrada de Desenvolvimento do Polo Petrolina e Juazeiro	Região Geográfica Intermediária de São Raimundo Nonato	Piauí	https://gem.wiki/Ventos_de_São_Roque_wind_farm	L916521	G920525	IT0003128367	1	399		-99	40	80	120
wind	Brazil	Americas	Latin America and the Caribbean	Ventos de São Roque wind farm	13	Parque Eólico Ventos de São Roque		45.6	pre-construction			onshore						Enel Green Power Brasil Participações LTDA		-8.9525	-41.6699	exact			Região Geográfica Intermediária de São Raimundo Nonato	Piauí	https://gem.wiki/Ventos_de_São_Roque_wind_farm	L916521	G920526	IT0003128367	1	399		-99	40	80	120
wind	Brazil	Americas	Latin America and the Caribbean	Ventos de São Roque wind farm	19	Parque Eólico Ventos de São Roque		45.6	construction			onshore						Enel Green Power Brasil Participações LTDA		-8.9436	-41.6394	exact			Região Geográfica Intermediária de São Raimundo Nonato	Piauí	https://gem.wiki/Ventos_de_São_Roque_wind_farm	L916521	G920527	IT0003128367	1	399		-99	40	80	120
wind	Brazil	Americas	Latin America and the Caribbean	Ventos de São Roque wind farm	22	Parque Eólico Ventos de São Roque		45.6	construction			onshore						Enel Green Power Brasil Participações LTDA		-8.963	-41.6764	exact			Região Geográfica Intermediária de São Raimundo Nonato	Piauí	https://gem.wiki/Ventos_de_São_Roque_wind_farm	L916521	G920528	IT0003128367	1	399		-99	40	80	120
wind	Brazil	Americas	Latin America and the Caribbean	Ventos de São Roque wind farm	26	Parque Eólico Ventos de São Roque		45.6	construction			onshore						Enel Green Power Brasil Participações LTDA		-8.9647	-41.6995	exact			Região Geográfica Intermediária de São Raimundo Nonato	Piauí	https://gem.wiki/Ventos_de_São_Roque_wind_farm	L916521	G920529	IT0003128367	1	399		-99	40	80	120
wind	Brazil	Americas	Latin America and the Caribbean	Ventos de São Roque wind farm	29	Parque Eólico Ventos de São Roque		34.2	construction			onshore						Enel Green Power Brasil Participações LTDA		-8.9702	-41.7306	exact			Região Geográfica Intermediária de São Raimundo Nonato	Piauí	https://gem.wiki/Ventos_de_São_Roque_wind_farm	L916521	G920530	IT0003128367	1	399	399	-99	40	80	120
wind	Mexico	Americas	Latin America and the Caribbean	Vientos Del Altiplano wind farm		Parque Eólico Vientos del Altiplano		100	operating	2016		onshore						Enel Green Power SPA		23.8794	-101.515	exact		Mazapil		Zacatecas	https://gem.wiki/Vientos_Del_Altiplano_wind_farm	L905225	G906856	IT0003128367	1	100	100	8	2056	2096	2136
wind	Spain	Europe	Southern Europe	Vilella wind farm				50	pre-construction			onshore						Enel Green Power España		41.6559	1.4885	approximate	Veciana	Anoia		Cataluña	https://gem.wiki/Vilella_wind_farm	L915080	G918667	IT0003128367	1	50	50	-99	40	80	120
wind	Colombia	Americas	Latin America and the Caribbean	Warrutumana wind farm		Parque Eólico Warrutumana		100	cancelled			onshore						Enel Green Power SPA		11.9917	-71.6769	approximate	Uribia			La Guajira	https://gem.wiki/Warrutumana_wind_farm	L905187	G906750	IT0003128367	1	100	100	-99	40	80	120
wind	Colombia	Americas	Latin America and the Caribbean	Watchuali wind farm		Parque Eólico Watchuali		150	cancelled			onshore						Enel Green Power SPA		11.9917	-71.6769	approximate	Uribia			La Guajira	https://gem.wiki/Watchuali_wind_farm	L905188	G906751	IT0003128367	1	150	150	-99	40	80	120
wind	Peru	Americas	Latin America and the Caribbean	Wayra wind farm (Peru)	1	Parque Eólico Wayra	Nazca	132	operating	2018		onshore						Enel Green Power SPA		-15.0621	-75.0531	exact	Marcona		Nazca	Ica	https://gem.wiki/Wayra_wind_farm_(Peru)	L905191	G906754	IT0003128367	1	309		6	2058	2098	2138
wind	Peru	Americas	Latin America and the Caribbean	Wayra wind farm (Peru)	Extension	Parque Eólico Wayra	Wayra Extension	177	construction	2024		onshore						Enel Green Power SPA		-14.829	-74.9434	approximate	Marcona		Nazca	Ica	https://gem.wiki/Wayra_wind_farm_(Peru)	L905191	G906755	IT0003128367	1	309	309	0	2064	2104	2144
wind	United States	Americas	Northern America	White Cloud Wind Project	1			236	operating	2020		onshore						Enel Green Power		40.3289	-95.0038	exact		Nodaway County		Missouri	https://gem.wiki/White_Cloud_Wind_Project	L907478	G910099	IT0003128367	1	236	236	4	2060	2100	2140
wind	United States	Americas	Northern America	Whitney Hill Wind Power	1			65	operating	2020		onshore						Enel Green Power		39.9448	-89.2967	exact		Logan County		Illinois	https://gem.wiki/Whitney_Hill_Wind_Power	L906776	G909123	IT0003128367	1	65	65	4	2060	2100	2140
wind	Colombia	Americas	Latin America and the Caribbean	Windpeshi wind farm		Parque Eólico Windpeshi		205	shelved			onshore						Enel Green Power SPA		11.6023	-72.0094	exact		Maicao		La Guajira	https://gem.wiki/Windpeshi_wind_farm	L905189	G906752	IT0003128367	1	205	205	-99	40	80	120
wind	Peru	Americas	Latin America and the Caribbean	Yacila wind farm		Parque Eólico Yacila		48	cancelled			onshore						Enel Green Power SPA		-5.1756	-81.1579	exact	Paita			Piura	https://gem.wiki/Yacila_wind_farm	L905192	G906756	IT0003128367	1	48	48	-99	40	80	120
wind	Brazil	Americas	Latin America and the Caribbean	Zeus Enel wind farm	1	Complexo Eólico Zeus Enel		80	cancelled			onshore						Enel Green Power Brasil Participações LTDA		-10.3333	-53.2001	approximate			Região Geográfica Intermediária de Sinop	Mato Grosso	https://gem.wiki/Zeus_Enel_wind_farm	L905209	G906833	IT0003128367	1	80	80	-99	40	80	120
wind	Spain	Europe	Southern Europe	Zeus wind farm				30	pre-construction			onshore						Enel Green Power España		42.3733	2.9206	approximate	Capmany	Alt Emporda		Cataluña	https://gem.wiki/Zeus_wind_farm	L913410	G916676	IT0003128367	1	30	30	-99	40	80	120
wind	Greece	Europe	Southern Europe	Zoodochos Peye wind farm		Ζωοδοχος Πηγη	Zoodochos Pigi	24	operating	2011		onshore						Enel Green Power Greece SA		40.4314	22.0864	exact		Kozani Regional Unit	Western Macedonia	Epirus and Western Macedonia	https://gem.wiki/Zoodochos_Peye_wind_farm	L912552	G915680	IT0003128367	1	24	24	13	2051	2091	2131

## Sheet: Factors
Fuel Type	Capacity factor 2021	Capacity factor 2022	CF2020	CF2021	CF2022	CF2023		Enel SpA - annual report 2021	https://www.enel.com/content/dam/enel-com/documenti/investitori/informazioni-finanziarie/2021/annuali/en/integrated-annual-report_2021.pdf
Coal-hard	0.198807	0.303488	0.168675	0.228938	0.341634	0.265342		Enel SpA - annual report 2022	https://www.enel.com/content/dam/enel-com/documenti/investitori/informazioni-finanziarie/2022/annuali/en/integrated-annual-report_2022.pdf
Lignite	0	0	0	0	0	0
Oil	0.2052	0.193137	0.189115	0.221285	0.232177	0.154096
Gas	0.361153	0.398461	0.329734	0.392571	0.447255	0.349668
Fuel Type	Heat rate (Btu per kWh) 2022
Coal	10689							CDP C-EU8.2d 2021
Petroleum	11166							Energy Source Type	Nameplate capacity (MW)	Gross electricity generation (GWh)	Net electricity generation (GWh)	Absolute scope 1 emissions (metric tons CO2e)	Scope 1 emissions intensity (metric tons CO2e per GWh)		Capacity factor
Natural Gas	7740							Coal – hard	6910	13858	13858	1.36975e+07	988		0.228938
Nuclear	10448							Lignite	0	0	0	0	0
								Oil	3858	7411	7411	6.03781e+06	815		0.219286
Fuel Type	Emission factors (kg of CO2 per TJ) US		Fuel Type	Emission factors (kg of CO2 per TJ) IPCC2006				Gas	22896	67016	67016	3.09385e+07	462		0.334129
Bituminous Coal	88374.7		Crude Oil	73300				Sustainable biomass	0	0	0	0	0
Distillate Oil	70271.4		Petroleum Coke	97500				Other biomass	6	40	40	37492.1	929		0.761035
Jet Fuel	68461		Coking Coal	94600				Waste (non-biomass)	0	0	0	0	0
Kerosene	69370.9		Other Bituminous Coal	94600				Nuclear	3328	25504	25504	1861.99	0.1
Lignite Coal	93142.3		Sub-Bituminous Coal	96100				Fossil-fuel plants fitted with CCS	0	0	0	0	0
Municipal Solid Waste	47286.7		Lignite	101000				Geothermal	915	6086	6086	6129.33	1
Natural Gas	50149.2		Coke	107000				Hydropower	27847	57001	57001	324309	6		0.233668
Petroleum Coke	96791.4		Gas/Diesel Oil	74100				Wind	14903	37791	37791	9236.83	0.2		0.289475
Propane Gas	59598.9		Residual Fuel Oil	77400				Solar	6395	7899	7899	12445.8	2		0.141003
Refined Coal	88374.7		Natural Gas	56100				Marine	0	0	0	0	0
Residual Fuel Oil	71171.8		Natural Gas Liquids	64200				Other renewable	0	0	0	0	0
Subbituminous Coal	92061.8		Wood / Wood Waste	112000				Other non-renewable	0	0	0	0	0
Tire-Derived Fuel	81484.1		Charcoal	112000				Total	87058	222605	222605	5.10653e+07	229		0.291892
Waste Coal	88374.7		Industrial Wastes	143000
Waste Oil	70138.7		Waste Oils	73300
Fuel Type	Emission factors (kg of CO2 per MMBTU) US		Fuel Type	Emission factors (kg of CO2 per MMBTU) IPCC2006				CDP C-EU8.2d 2022
Bituminous Coal	93.24		Crude Oil	77.3354				Energy Source Type	Nameplate capacity (MW)	Gross electricity generation (GWh)	Net electricity generation (GWh)	Absolute scope 1 emissions (metric tons CO2e)	Scope 1 emissions intensity (metric tons CO2e per GWh)		Capacity factor
Distillate Oil	74.14		Petroleum Coke	102.868				Coal – hard	6590.49		19722	19600682	994		0.341609
Jet Fuel	72.23		Coking Coal	99.808				Lignite	0		0	0	0
Kerosene	73.19		Other Bituminous Coal	99.808				Oil	7204		14652	10148099	693		0.232177
Lignite Coal	98.27		Sub-Bituminous Coal	101.391				Gas	13894		54436	22351177	411		0.447255
Municipal Solid Waste	49.89		Lignite	106.56				Sustainable biomass	0		0	0	0
Natural Gas	52.91		Coke	112.891				Other biomass	6		43	33955	791		0.818113
Petroleum Coke	102.12		Gas/Diesel Oil	78.1794				Waste (non-biomass)	0		0	0	0
Propane Gas	62.88		Residual Fuel Oil	81.6611				Nuclear	3328		26508	2215	0		0.909263
Refined Coal	93.24		Natural Gas	59.1885				Fossil-fuel plants fitted with CCS	0		0	0	0
Residual Fuel Oil	75.09		Natural Gas Liquids	67.7344				Geothermal	931		6117	8671	1		0.75004
Subbituminous Coal	97.13		Wood / Wood Waste	118.166				Hydropower	28355		51728	339439	7		0.208253
Tire-Derived Fuel	85.97		Charcoal	118.166				Wind	15735		43255	916	0		0.313809
Waste Coal	93.24		Industrial Wastes	150.873				Solar	8534		11306	6767	1		0.151235
Waste Oil	74		Waste Oils	77.3354				Marine	0		0	0	0
								Other renewable	0		0	0	0
								Other non-renewable	0		0	0	0
								Total	84578		227767	52491922	230		0
								https://www.enel.com/content/dam/enel-common/press/en/2024-march/Enel%20Quarterly%20Bulletin%20FY%202023%20-%20EN.pdf
								https://www.enel.com/content/dam/enel-common/press/en/2022-march/Enel%20Quarterly%20Bulletin%20FY%202021%20-%20EN.pdf
								MW	2020	2021	2022	2023
								Coal	8903	6910	6590	4627
								CCGT	15009	15039	13894	11983
								Oil & Gas	11711	11715	7204	5942
								Nuclear	3328	3328	3328	3328
								GWh	2020	2021	2022	2023
								Coal	13155	13858	19722	10755
								CCGT	43353	51718	54436	36705
								Oil & Gas	19401	22709	14652	8021
								Nuclear	25839	25504	26508	24865
								CF	2020	2021	2022	2023
								Coal	0.168675	0.228938	0.341634	0.265342
								CCGT	0.329734	0.392571	0.447255	0.349668
								Oil & Gas	0.189115	0.221285	0.232177	0.154096
								Nuclear	0.886315	0.874824	0.909263	0.852906
								MW	87567	90380	90123	89230
								GWh	217002	232237	239041	220622
								GEM (MW)	2020	2021	2022	2023
								Coal	6756.43	5820.43	5470.43	4757.83
								Gas	13026.3	13026.3	13026.3	13026.3
								Oil	4041.32	4041.32	4041.32	4041.32
								CF	2020	2021	2022	2023
								Coal	0.222264	0.271795	0.411553	0.258046
								CCGT	0.379921	0.453227	0.477046	0.321662
								Oil	0.548021	0.641462	0.413875	0.226569

## Sheet: Enel_BAU
Type	Country/area	Region	Subregion	Plant / Project name	Unit / Phase name	Plant / Project name (local)	Plant / Project name (other)	Capacity (MW)	Status	Start year	Retired year	Technology	Fuel	Country/area 1 (hydropower only)	Country/area 2 (hydropower only)	Country/area 1 Capacity (MW) (hydropower only)	Country/area 2 Capacity (MW) (hydropower only)	Owner	Parent	Latitude	Longitude	Location accuracy	City	Local area (taluk, county)	Major area (prefecture, district)	Subnational unit (state, province)	GEM.Wiki URL	GEM location ID	GEM unit/phase ID	CompISIN	Ownership	Plant capacity	Plant capacity	Age	Reinvestment year	Reinvestment year	Reinvestment year	2020	2021	2022	2023	2024	2025	2026	2027	2028	2029	2030	2031
coal	Italy	Europe	Southern Europe	Andrea Palladio power station	Unit 1		Fusina power station	165	retired	1964	2021	subcritical	bituminous					Enel [100%]	Enel [100.0%]	45.4314	12.2468	exact	Fusina		Venezia	Veneto	https://www.gem.wiki/Andrea_Palladio_power_station	L100000102860	G100000100196	IT0003128367	1	1816		60	2004	2044	2084	165	0	0	0	0	0	0	0	0	0	0	0
coal	Italy	Europe	Southern Europe	Andrea Palladio power station	Unit 2		Fusina power station	171	retired	1969	2021	subcritical	bituminous					Enel [100%]	Enel [100.0%]	45.4314	12.2468	exact	Fusina		Venezia	Veneto	https://www.gem.wiki/Andrea_Palladio_power_station	L100000102860	G100000100197	IT0003128367	1	1816		55	2009	2049	2089	171	0	0	0	0	0	0	0	0	0	0	0
coal	Italy	Europe	Southern Europe	Andrea Palladio power station	Unit 3		Fusina power station	320	retired	1974	2023	subcritical	bituminous					Enel [100%]	Enel [100.0%]	45.4314	12.2468	exact	Fusina		Venezia	Veneto	https://www.gem.wiki/Andrea_Palladio_power_station	L100000102860	G100000100198	IT0003128367	1	1816		50	2014	2054	2094	320	320	320	0	0	0	0	0	0	0	0	0
coal	Italy	Europe	Southern Europe	Andrea Palladio power station	Unit 4		Fusina power station	320	retired	1974	2023	subcritical	bituminous					Enel [100%]	Enel [100.0%]	45.4314	12.2468	exact	Fusina		Venezia	Veneto	https://www.gem.wiki/Andrea_Palladio_power_station	L100000102860	G100000100199	IT0003128367	1	1816	1816	50	2014	2054	2094	320	320	320	0	0	0	0	0	0	0	0	0
coal	Chile	Americas	Latin America and the Caribbean	Bocamina power station	Unit 1	Termoeléctrica Bocamina		128	retired	1970	2020	subcritical	bituminous					Enel Generación Chile [100%]	Enel Generación Chile [100.0%]	-37.0218	-73.1663	exact	Coronel		Concepción	Biobio Region	https://www.gem.wiki/Bocamina_power_station	L100000100195	G100000100976	IT0003128367	1	478		54	2010	2050	2090	0	0	0	0	0	0	0	0	0	0	0	0
coal	Chile	Americas	Latin America and the Caribbean	Bocamina power station	Unit 2	Termoeléctrica Bocamina		350	retired	2012	2022	subcritical	bituminous					Enel Generación Chile [100%]	Enel Generación Chile [100.0%]	-37.0218	-73.1663	exact	Coronel		Concepción	Biobio Region	https://www.gem.wiki/Bocamina_power_station	L100000100195	G100000100977	IT0003128367	1	478	478	12	2052	2092	2132	350	350	0	0	0	0	0	0	0	0	0	0
coal	Italy	Europe	Southern Europe	Brindisi Sud power station	Unit 1		Federico II, Federico 2 (Unit 1), Federico 3 (Unit 2), Federico 4 (Unit 3), Federico 5 (Unit 4)	660	operating	1991	2025	supercritical	bituminous					Enel [100%]	Enel [100.0%]	40.5636	18.0322	exact	Brindisi		Brindisi	Apulia	https://www.gem.wiki/Brindisi_Sud_power_station	L100000102842	G100000101061	IT0003128367	1	4320		33	2031	2071	2111	660	660	660	660	660	660	660	660	660	660	660	660
coal	Italy	Europe	Southern Europe	Brindisi Sud power station	Unit 2		Federico II, Federico 2 (Unit 1), Federico 3 (Unit 2), Federico 4 (Unit 3), Federico 5 (Unit 4)	660	retired	1992	2020	supercritical	bituminous					Enel [100%]	Enel [100.0%]	40.5636	18.0322	exact	Brindisi		Brindisi	Apulia	https://www.gem.wiki/Brindisi_Sud_power_station	L100000102842	G100000101062	IT0003128367	1	4320		32	2032	2072	2112	0	0	0	0	0	0	0	0	0	0	0	0
coal	Italy	Europe	Southern Europe	Brindisi Sud power station	Unit 3		Federico II, Federico 2 (Unit 1), Federico 3 (Unit 2), Federico 4 (Unit 3), Federico 5 (Unit 4)	660	operating	1992	2025	supercritical	bituminous					Enel [100%]	Enel [100.0%]	40.5636	18.0322	exact	Brindisi		Brindisi	Apulia	https://www.gem.wiki/Brindisi_Sud_power_station	L100000102842	G100000101063	IT0003128367	1	4320		32	2032	2072	2112	660	660	660	660	660	660	660	660	660	660	660	660
coal	Italy	Europe	Southern Europe	Brindisi Sud power station	Unit 4		Federico II, Federico 2 (Unit 1), Federico 3 (Unit 2), Federico 4 (Unit 3), Federico 5 (Unit 4)	660	operating	1993	2025	supercritical	bituminous					Enel [100%]	Enel [100.0%]	40.5636	18.0322	exact	Brindisi		Brindisi	Apulia	https://www.gem.wiki/Brindisi_Sud_power_station	L100000102842	G100000101064	IT0003128367	1	4320	4320	31	2033	2073	2113	660	660	660	660	660	660	660	660	660	660	660	660
coal	Italy	Europe	Southern Europe	La Spezia power station	Unit 5			600	retired	1967	2021	supercritical	bituminous					Enel [100%]	Enel [100.0%]	44.1122	9.87505	exact	La Spezia		La Spezia	Liguria	https://www.gem.wiki/La_Spezia_power_station	L100000102849	G100000106077	IT0003128367	1	1282	1282	57	2007	2047	2087	600	0	0	0	0	0	0	0	0	0	0	0
coal	Slovakia	Europe	Eastern Europe	Novaky power station	Phase B Unit 1		Novaky ENO	110	retired	1964	2023	subcritical	lignite					Slovenské Elektrárne [100%]	Ministry of Economy (Slovakia) [34.0%]; Enel SpA [33.0%]; EP Slovakia BV [33.0%]	48.6988	18.5335	exact	Nováky		Prievidza	Trenčín	https://www.gem.wiki/Novaky_power_station	L100000103415	G100000107531	IT0003128367	0.33	220		60	2004	2044	2084	36.3	36.3	36.3	0	0	0	0	0	0	0	0	0
coal	Slovakia	Europe	Eastern Europe	Novaky power station	Phase B Unit 2		Novaky ENO	110	retired	1964	2023	subcritical	lignite					Slovenské Elektrárne [100%]	Ministry of Economy (Slovakia) [34.0%]; Enel SpA [33.0%]; EP Slovakia BV [33.0%]	48.6988	18.5335	exact	Nováky		Prievidza	Trenčín	https://www.gem.wiki/Novaky_power_station	L100000103415	G100000107532	IT0003128367	0.33	220	220	60	2004	2044	2084	36.3	36.3	36.3	0	0	0	0	0	0	0	0	0
coal	Italy	Europe	Southern Europe	Pietro Vannucci power station	Unit 1		Bastardo power station	75	retired	1989	2020	subcritical	bituminous					Enel [100%]	Enel [100.0%]	42.897	12.5383	exact	Gualdo Cattaneo		Perugia	Umbria	https://www.gem.wiki/Pietro_Vannucci_power_station	L100000102859	G100000107978	IT0003128367	1	150		35	2029	2069	2109	0	0	0	0	0	0	0	0	0	0	0	0
coal	Italy	Europe	Southern Europe	Pietro Vannucci power station	Unit 2		Bastardo power station	75	retired	1990	2020	subcritical	bituminous					Enel [100%]	Enel [100.0%]	42.897	12.5383	exact	Gualdo Cattaneo		Perugia	Umbria	https://www.gem.wiki/Pietro_Vannucci_power_station	L100000102859	G100000107979	IT0003128367	1	150	150	34	2030	2070	2110	0	0	0	0	0	0	0	0	0	0	0	0
coal	Italy	Europe	Southern Europe	Sulcis power station	Unit 3			240	operating	1986	2027	subcritical	bituminous					Enel [100%]	Enel [100.0%]	39.1953	8.39992	exact	Portoscuso (Portu de Scusi)		Carbonia-Iglesias (Carbònia-Igrèsias)	Sardegna	https://www.gem.wiki/Sulcis_power_station	L100000102844	G100000109678	IT0003128367	1	590		38	2026	2066	2106	240	240	240	240	240	240	240	240	240	240	240	240
coal	Italy	Europe	Southern Europe	Sulcis power station	Unit 2			350	operating	2005	2027	subcritical	bituminous					Enel [100%]	Enel [100.0%]	39.1953	8.39992	exact	Portoscuso (Portu de Scusi)		Carbonia-Iglesias (Carbònia-Igrèsias)	Sardegna	https://www.gem.wiki/Sulcis_power_station	L100000102844	G100000109677	IT0003128367	1	590	590	19	2045	2085	2125	350	350	350	350	350	350	350	350	350	350	350	350
coal	Colombia	Americas	Latin America and the Caribbean	Termozipa power station	Unit 2	Central Térmica Termozipa	Martín del Corral power station	38	operating	1964	2027	subcritical	bituminous					Enel Colombia [100%]	Enel Américas SA [57.3%]; Grupo Energía Bogotá SA ESP [42.5%]	4.97082	-73.9473	exact	Tocancipá		Tocancipá	Cundinamarca	https://www.gem.wiki/Termozipa_power_station	L100000101769	G100000110023	IT0003128367	0.573	236		60	2004	2044	2084	21.774	21.774	21.774	21.774	21.774	21.774	21.774	21.774	21.774	21.774	21.774	21.774
coal	Colombia	Americas	Latin America and the Caribbean	Termozipa power station	Unit 3	Central Térmica Termozipa	Martín del Corral power station	66	operating	1976	2027	subcritical	bituminous					Enel Colombia [100%]	Enel Américas SA [57.3%]; Grupo Energía Bogotá SA ESP [42.5%]	4.97082	-73.9473	exact	Tocancipá		Tocancipá	Cundinamarca	https://www.gem.wiki/Termozipa_power_station	L100000101769	G100000110024	IT0003128367	0.573	236		48	2016	2056	2096	37.818	37.818	37.818	37.818	37.818	37.818	37.818	37.818	37.818	37.818	37.818	37.818
coal	Colombia	Americas	Latin America and the Caribbean	Termozipa power station	Unit 4	Central Térmica Termozipa	Martín del Corral power station	66	operating	1981	2027	subcritical	bituminous					Enel Colombia [100%]	Enel Américas SA [57.3%]; Grupo Energía Bogotá SA ESP [42.5%]	4.97082	-73.9473	exact	Tocancipá		Tocancipá	Cundinamarca	https://www.gem.wiki/Termozipa_power_station	L100000101769	G100000110025	IT0003128367	0.573	236		43	2021	2061	2101	37.818	37.818	37.818	37.818	37.818	37.818	37.818	37.818	37.818	37.818	37.818	37.818
coal	Colombia	Americas	Latin America and the Caribbean	Termozipa power station	Unit 5	Central Térmica Termozipa	Martín del Corral power station	66	operating	1992	2027	subcritical	bituminous					Enel Colombia [100%]	Enel Américas SA [57.3%]; Grupo Energía Bogotá SA ESP [42.5%]	4.97082	-73.9473	exact	Tocancipá		Tocancipá	Cundinamarca	https://www.gem.wiki/Termozipa_power_station	L100000101769	G100000110026	IT0003128367	0.573	236	236	32	2032	2072	2112	37.818	37.818	37.818	37.818	37.818	37.818	37.818	37.818	37.818	37.818	37.818	37.818
coal	Italy	Europe	Southern Europe	Torrevaldaliga Nord power station	Unit 1			660	operating	2009	2025	ultra-supercritical	bituminous					Enel [100%]	Enel [100.0%]	42.1269	11.7583	exact	Civitavecchia			Rome	https://www.gem.wiki/Torrevaldaliga_Nord_power_station	L100000102854	G100000110298	IT0003128367	1	1980		15	2049	2089	2129	660	660	660	660	660	660	660	660	660	660	660	660
coal	Italy	Europe	Southern Europe	Torrevaldaliga Nord power station	Unit 2			660	operating	2010	2025	ultra-supercritical	bituminous					Enel [100%]	Enel [100.0%]	42.1269	11.7583	exact	Civitavecchia			Rome	https://www.gem.wiki/Torrevaldaliga_Nord_power_station	L100000102854	G100000110299	IT0003128367	1	1980		14	2050	2090	2130	660	660	660	660	660	660	660	660	660	660	660	660
coal	Italy	Europe	Southern Europe	Torrevaldaliga Nord power station	Unit 3			660	operating	2010	2025	ultra-supercritical	bituminous					Enel [100%]	Enel [100.0%]	42.1269	11.7583	exact	Civitavecchia			Rome	https://www.gem.wiki/Torrevaldaliga_Nord_power_station	L100000102854	G100000110300	IT0003128367	1	1980	1980	14	2050	2090	2130	660	660	660	660	660	660	660	660	660	660	660	660
coal	Slovakia	Europe	Eastern Europe	Vojany I power station	Unit 5		Vojany EVO	110	operating	1966	2024	unknown	anthracite					Slovenské Elektrárne [100%]	Ministry of Economy (Slovakia) [34.0%]; Enel SpA [33.0%]; EP Slovakia BV [33.0%]	48.5525	21.9726	exact	Ižkovce		Michalovce	Košice	https://www.gem.wiki/Vojany_I_power_station	L100000103410	G100000110650	IT0003128367	0.33	220		58	2006	2046	2086	36.3	36.3	36.3	36.3	36.3	36.3	36.3	36.3	36.3	36.3	36.3	36.3
coal	Slovakia	Europe	Eastern Europe	Vojany I power station	Unit 6		Vojany EVO	110	operating	1966	2024	unknown	anthracite					Slovenské Elektrárne [100%]	Ministry of Economy (Slovakia) [34.0%]; Enel SpA [33.0%]; EP Slovakia BV [33.0%]	48.5525	21.9726	exact	Ižkovce		Michalovce	Košice	https://www.gem.wiki/Vojany_I_power_station	L100000103410	G100000110651	IT0003128367	0.33	220	220	58	2006	2046	2086	36.3	36.3	36.3	36.3	36.3	36.3	36.3	36.3	36.3	36.3	36.3	36.3
oil/gas	Italy	Europe	Southern Europe	Andrea Palladio power station	1	Andrea Palladio centrale termoelettrica a carbone	Fusina power station	560	shelved			GT	NG					Enel SpA [100.0%]	Enel SpA [100.0%]	45.4314	12.2468	exact	Fusina		Venezia	Veneto	https://www.gem.wiki/Andrea_Palladio_power_station	L100000102860	G100000401333	IT0003128367	1	1816		-99	40	80	120	0	0	0	0	0	0	0	0	0	0	0	0
oil/gas	Italy	Europe	Southern Europe	Andrea Palladio power station	2	Andrea Palladio centrale termoelettrica a carbone	Fusina power station	280	shelved			ST	WSTH-NG					Enel SpA [100.0%]	Enel SpA [100.0%]	45.4314	12.2468	exact	Fusina		Venezia	Veneto	https://www.gem.wiki/Andrea_Palladio_power_station	L100000102860	G100000409839	IT0003128367	1	1816	1816	-99	40	80	120	0	0	0	0	0	0	0	0	0	0	0	0
oil/gas	Italy	Europe	Southern Europe	Assemini power station	GT1			90	operating	1992		GT	NG/D/HFO					Enel SpA [100.0%]	Enel SpA [100.0%]	39.2278	8.99654	exact	Assemini			Sardinia	https://www.gem.wiki/Assemini_power_station	L100000408812	G100000412826	IT0003128367	1	180		32	2032	2072	2112	90	90	90	90	90	90	90	90	90	90	90	90
oil/gas	Italy	Europe	Southern Europe	Assemini power station	GT2			90	operating	1992		GT	NG/D/HFO					Enel SpA [100.0%]	Enel SpA [100.0%]	39.2278	8.99654	exact	Assemini			Sardinia	https://www.gem.wiki/Assemini_power_station	L100000408812	G100000412825	IT0003128367	1	180	180	32	2032	2072	2112	90	90	90	90	90	90	90	90	90	90	90	90
oil/gas	Chile	Americas	Latin America and the Caribbean	Atacama power station	CC1	Central Térmica Atacama		358	operating	1999		CC	NG/D					Enel Generación Chile SA [100%]	Enel Generación Chile SA [100.0%]	-23.0898	-70.4168	exact	Mejillones			Antofagasta	https://gem.wiki/Atacama_power_station	L100000406549	G100000406737	IT0003128367	1	716		25	2039	2079	2119	358	358	358	358	358	358	358	358	358	358	358	358
oil/gas	Chile	Americas	Latin America and the Caribbean	Atacama power station	CC2	Central Térmica Atacama		358	operating	2000		CC	NG/D					Enel Generación Chile SA [100%]	Enel Generación Chile SA [100.0%]	-23.0898	-70.4168	exact	Mejillones			Antofagasta	https://gem.wiki/Atacama_power_station	L100000406549	G100000406736	IT0003128367	1	716	716	24	2040	2080	2120	358	358	358	358	358	358	358	358	358	358	358	358
oil/gas	Italy	Europe	Southern Europe	Brindisi Sud power station	CC1		Federico II	840	shelved			CC	NG					Enel SpA [100.0%]	Enel SpA [100.0%]	40.5636	18.0322	exact	Località Produttiva		Brindisi	Apulia	https://www.gem.wiki/Brindisi_Sud_power_station	L100000102842	G100000401334	IT0003128367	1	4320		-99	40	80	120	0	0	0	0	0	0	0	0	0	0	0	0
oil/gas	Italy	Europe	Southern Europe	Brindisi Sud power station	CC2		Federico II	840	shelved			CC	NG					Enel SpA [100.0%]	Enel SpA [100.0%]	40.5636	18.0322	exact	Località Produttiva		Brindisi	Apulia	https://www.gem.wiki/Brindisi_Sud_power_station	L100000102842	G100000401335	IT0003128367	1	4320	4320	-99	40	80	120	0	0	0	0	0	0	0	0	0	0	0	0
oil/gas	Colombia	Americas	Latin America and the Caribbean	Cartagena power station	1	Central Termoeléctrica Cartagena	Termocartagena (Tecsa)	66	operating	1973		ST	NG/FO					Enel Colombia SA ESP [100%]	Enel Américas SA [57.3%]; Grupo Energía Bogotá SA ESP [42.5%]	10.3555	-75.5109	exact	Cartagena			Bolívar	https://gem.wiki/Cartagena_power_station	L100000406567	G100000406714	IT0003128367	0.573	203		51	2013	2053	2093	37.818	37.818	37.818	37.818	37.818	37.818	37.818	37.818	37.818	37.818	37.818	37.818
oil/gas	Colombia	Americas	Latin America and the Caribbean	Cartagena power station	2	Central Termoeléctrica Cartagena	Termocartagena (Tecsa)	66	operating	1976		ST	NG/FO					Enel Colombia SA ESP [100%]	Enel Américas SA [57.3%]; Grupo Energía Bogotá SA ESP [42.5%]	10.3555	-75.5109	exact	Cartagena			Bolívar	https://gem.wiki/Cartagena_power_station	L100000406567	G100000410632	IT0003128367	0.573	203		48	2016	2056	2096	37.818	37.818	37.818	37.818	37.818	37.818	37.818	37.818	37.818	37.818	37.818	37.818
oil/gas	Colombia	Americas	Latin America and the Caribbean	Cartagena power station	3	Central Termoeléctrica Cartagena	Termocartagena (Tecsa)	71	operating	1980		ST	NG/FO					Enel Colombia SA ESP [100%]	Enel Américas SA [57.3%]; Grupo Energía Bogotá SA ESP [42.5%]	10.3555	-75.5109	exact	Cartagena			Bolívar	https://gem.wiki/Cartagena_power_station	L100000406567	G100000410633	IT0003128367	0.573	203	203	44	2020	2060	2100	40.683	40.683	40.683	40.683	40.683	40.683	40.683	40.683	40.683	40.683	40.683	40.683
oil/gas	Italy	Europe	Southern Europe	Codrongianos power station	GT 1&2			34	operating	1969		CC	NG/HFO/OG					Enel SpA [100.0%]	Enel SpA [100.0%]	40.6529	8.71249	exact	Sassari			Sardinia	https://www.gem.wiki/Codrongianos_power_station	L100000408809	G100000412819	IT0003128367	1	100		55	2009	2049	2089	34	34	34	34	34	34	34	34	34	34	34	34
oil/gas	Italy	Europe	Southern Europe	Codrongianos power station	GT 3-6			66	operating	1970		CC	NG/HFO/OG					Enel SpA [100.0%]	Enel SpA [100.0%]	40.6529	8.71249	exact	Sassari			Sardinia	https://www.gem.wiki/Codrongianos_power_station	L100000408809	G100000412818	IT0003128367	1	100	100	54	2010	2050	2090	66	66	66	66	66	66	66	66	66	66	66	66
oil/gas	Italy	Europe	Southern Europe	La Casella power station	1		Edoardo Amaldi	381	operating	2002		CC	NG					Enel SpA [100.0%]	Enel SpA [100.0%]	45.0904	9.4805	exact	Castel San Giovanni			Piacenza	https://www.gem.wiki/La_Casella_power_station	L100000400383	G100000400383	IT0003128367	1	2394		22	2042	2082	2122	381	381	381	381	381	381	381	381	381	381	381	381
oil/gas	Italy	Europe	Southern Europe	La Casella power station	2		Edoardo Amaldi	381	operating	2002		CC	NG					Enel SpA [100.0%]	Enel SpA [100.0%]	45.0904	9.4805	exact	Castel San Giovanni			Piacenza	https://www.gem.wiki/La_Casella_power_station	L100000400383	G100000400384	IT0003128367	1	2394		22	2042	2082	2122	381	381	381	381	381	381	381	381	381	381	381	381
oil/gas	Italy	Europe	Southern Europe	La Casella power station	3		Edoardo Amaldi	381	operating	2003		CC	NG					Enel SpA [100.0%]	Enel SpA [100.0%]	45.0904	9.4805	exact	Castel San Giovanni			Piacenza	https://www.gem.wiki/La_Casella_power_station	L100000400383	G100000400385	IT0003128367	1	2394		21	2043	2083	2123	381	381	381	381	381	381	381	381	381	381	381	381
oil/gas	Italy	Europe	Southern Europe	La Casella power station	4		Edoardo Amaldi	381	operating	2003		CC	NG					Enel SpA [100.0%]	Enel SpA [100.0%]	45.0904	9.4805	exact	Castel San Giovanni			Piacenza	https://www.gem.wiki/La_Casella_power_station	L100000400383	G100000400386	IT0003128367	1	2394		21	2043	2083	2123	381	381	381	381	381	381	381	381	381	381	381	381
oil/gas	Italy	Europe	Southern Europe	La Casella power station	LC6-1		Edoardo Amaldi	590	shelved			GT	NG					Enel SpA [100.0%]	Enel SpA [100.0%]	45.0904	9.4805	exact	Castel San Giovanni			Piacenza	https://www.gem.wiki/La_Casella_power_station	L100000400383	G100000409832	IT0003128367	1	2394		-99	40	80	120	0	0	0	0	0	0	0	0	0	0	0	0
oil/gas	Italy	Europe	Southern Europe	La Casella power station	LC6-2		Edoardo Amaldi	280	shelved			ST	WSTH-NG/BU					Enel SpA [100.0%]	Enel SpA [100.0%]	45.0904	9.4805	exact	Castel San Giovanni			Piacenza	https://www.gem.wiki/La_Casella_power_station	L100000400383	G100000409831	IT0003128367	1	2394	2394	-99	40	80	120	0	0	0	0	0	0	0	0	0	0	0	0
oil/gas	Italy	Europe	Southern Europe	La Spezia power station	SP1		Eugenio Montale	345	operating	2000		CC	NG					Enel SpA [100.0%]	Enel SpA [100.0%]	44.1112	9.87488	exact	La Spezia			Liguria	https://www.gem.wiki/La_Spezia_power_station	L100000102849	G100000400387	IT0003128367	1	1282		24	2040	2080	2120	345	345	345	345	345	345	345	345	345	345	345	345
oil/gas	Italy	Europe	Southern Europe	La Spezia power station	SP2		Eugenio Montale	337	operating	2000		CC	NG					Enel SpA [100.0%]	Enel SpA [100.0%]	44.1112	9.87488	exact	La Spezia			Liguria	https://www.gem.wiki/La_Spezia_power_station	L100000102849	G100000400388	IT0003128367	1	1282	1282	24	2040	2080	2120	337	337	337	337	337	337	337	337	337	337	337	337
oil/gas	Italy	Europe	Southern Europe	Larino power station	1			124	operating	1992		GT	NG					Enel SpA [100.0%]	Enel SpA [100.0%]	41.8195	14.966	exact	Area Artigianale Monte Arcano			Campobasso	https://www.gem.wiki/Larino_power_station	L100000400389	G100000400389	IT0003128367	1	548		32	2032	2072	2112	124	124	124	124	124	124	124	124	124	124	124	124
oil/gas	Italy	Europe	Southern Europe	Larino power station	2			124	operating	1992		GT	NG					Enel SpA [100.0%]	Enel SpA [100.0%]	41.8195	14.966	exact	Area Artigianale Monte Arcano			Campobasso	https://www.gem.wiki/Larino_power_station	L100000400389	G100000400390	IT0003128367	1	548		32	2032	2072	2112	124	124	124	124	124	124	124	124	124	124	124	124
oil/gas	Italy	Europe	Southern Europe	Larino power station	3			150	shelved			GT	NG					Enel SpA [100.0%]	Enel SpA [100.0%]	41.8195	14.966	exact	Area Artigianale Monte Arcano			Campobasso	https://www.gem.wiki/Larino_power_station	L100000400389	G100000411176	IT0003128367	1	548		-99	40	80	120	0	0	0	0	0	0	0	0	0	0	0	0
oil/gas	Italy	Europe	Southern Europe	Larino power station	4			150	shelved			GT	NG					Enel SpA [100.0%]	Enel SpA [100.0%]	41.8195	14.966	exact	Area Artigianale Monte Arcano			Campobasso	https://www.gem.wiki/Larino_power_station	L100000400389	G100000411175	IT0003128367	1	548	548	-99	40	80	120	0	0	0	0	0	0	0	0	0	0	0	0
oil/gas	Peru	Americas	Latin America and the Caribbean	Malacas power station	TG-4	Central Termoeléctrica Malacas		108	operating	1998		GT	NG					Enel Generación Piura SA [100%]	Enel Generación Piura SA [100.0%]	-4.53842	-81.2644	exact	Pariñas		Talara	Piura	https://gem.wiki/Malacas_power_station	L100000406606	G100000406656	IT0003128367	1	361		26	2038	2078	2118	108	108	108	108	108	108	108	108	108	108	108	108
oil/gas	Peru	Americas	Latin America and the Caribbean	Malacas power station	TG-5	Central Termoeléctrica Malacas		200	operating	2013		GT	NG/D					Enel Generación Piura SA [100%]	Enel Generación Piura SA [100.0%]	-4.53842	-81.2644	exact	Pariñas		Talara	Piura	https://gem.wiki/Malacas_power_station	L100000406606	G100000406655	IT0003128367	1	361		11	2053	2093	2133	200	200	200	200	200	200	200	200	200	200	200	200
oil/gas	Peru	Americas	Latin America and the Caribbean	Malacas power station	TG-6	Central Termoeléctrica Malacas		53	operating	2017		GT	NG/D					Enel Generación Piura SA [100%]	Enel Generación Piura SA [100.0%]	-4.53842	-81.2644	exact	Pariñas		Talara	Piura	https://gem.wiki/Malacas_power_station	L100000406606	G100000406657	IT0003128367	1	361	361	7	2057	2097	2137	53	53	53	53	53	53	53	53	53	53	53	53
oil/gas	Italy	Europe	Southern Europe	Montalto Di Castro power station	1			900	operating	1997		CC	LNG/NG/FO					Enel SpA [100.0%]	Enel SpA [100.0%]	42.3572	11.5373	exact	Montalto di Castro			Viterbo	https://www.gem.wiki/Montalto_Di_Castro_power_station	L100000400403	G100000400403	IT0003128367	1	3740		27	2037	2077	2117	900	900	900	900	900	900	900	900	900	900	900	900
oil/gas	Italy	Europe	Southern Europe	Montalto Di Castro power station	2			900	operating	1997		CC	LNG/NG/FO					Enel SpA [100.0%]	Enel SpA [100.0%]	42.3572	11.5373	exact	Montalto di Castro			Viterbo	https://www.gem.wiki/Montalto_Di_Castro_power_station	L100000400403	G100000400404	IT0003128367	1	3740		27	2037	2077	2117	900	900	900	900	900	900	900	900	900	900	900	900
oil/gas	Italy	Europe	Southern Europe	Montalto Di Castro power station	3			900	operating	1998		CC	LNG/NG/FO					Enel SpA [100.0%]	Enel SpA [100.0%]	42.3572	11.5373	exact	Montalto di Castro			Viterbo	https://www.gem.wiki/Montalto_Di_Castro_power_station	L100000400403	G100000400405	IT0003128367	1	3740		26	2038	2078	2118	900	900	900	900	900	900	900	900	900	900	900	900
oil/gas	Italy	Europe	Southern Europe	Montalto Di Castro power station	4			900	operating	1999		CC	LNG/NG/FO					Enel SpA [100.0%]	Enel SpA [100.0%]	42.3572	11.5373	exact	Montalto di Castro			Viterbo	https://www.gem.wiki/Montalto_Di_Castro_power_station	L100000400403	G100000400406	IT0003128367	1	3740		25	2039	2079	2119	900	900	900	900	900	900	900	900	900	900	900	900
oil/gas	Italy	Europe	Southern Europe	Montalto Di Castro power station	5			140	shelved			not found	NG					Enel SpA [100.0%]	Enel SpA [100.0%]	42.3572	11.5373	exact	Montalto di Castro			Viterbo	https://www.gem.wiki/Montalto_Di_Castro_power_station	L100000400403	G100000412806	IT0003128367	1	3740	3740	-99	40	80	120	0	0	0	0	0	0	0	0	0	0	0	0
oil/gas	Italy	Europe	Southern Europe	Pietrafitta power station	1			365	operating	2003		CC	NG					Enel SpA [100.0%]	Enel SpA [100.0%]	42.9954	12.1995	exact	Panicale			Perugia	https://www.gem.wiki/Pietrafitta_power_station	L100000104723	G100000400415	IT0003128367	1	365	365	21	2043	2083	2123	365	365	365	365	365	365	365	365	365	365	365	365
oil/gas	Italy	Europe	Southern Europe	Porto Corsini power station	3		Teodora	350	operating	2002		CC	NG					Enel Produzione SpA [100.0%]	Enel SpA [100.0%]	44.4836	12.2652	exact	Porto Corsini			Ravenna	https://www.gem.wiki/Porto_Corsini_power_station	L100000400418	G100000400418	IT0003128367	1	718		22	2042	2082	2122	350	350	350	350	350	350	350	350	350	350	350	350
oil/gas	Italy	Europe	Southern Europe	Porto Corsini power station	4		Teodora	368	operating	2002		CC	NG					Enel Produzione SpA [100.0%]	Enel SpA [100.0%]	44.4836	12.2652	exact	Porto Corsini			Ravenna	https://www.gem.wiki/Porto_Corsini_power_station	L100000400418	G100000400419	IT0003128367	1	718	718	22	2042	2082	2122	368	368	368	368	368	368	368	368	368	368	368	368
oil/gas	Italy	Europe	Southern Europe	Porto Empedocle power station	2		Vigata	80	operating	2015		GT	NG					Enel Produzione SpA [100.0%]	Enel SpA [100.0%]	37.2876	13.5212	exact	Porto Empedocle			Agrigento	https://www.gem.wiki/Porto_Empedocle_power_station	L100000400421	G100000400420	IT0003128367	1	125		9	2055	2095	2135	80	80	80	80	80	80	80	80	80	80	80	80
oil/gas	Italy	Europe	Southern Europe	Porto Empedocle power station	1		Vigata	45	operating			ST	HFO					Enel Produzione SpA [100.0%]	Enel SpA [100.0%]	37.2876	13.5212	exact	Porto Empedocle			Agrigento	https://www.gem.wiki/Porto_Empedocle_power_station	L100000400421	G100000412802	IT0003128367	1	125	125	-99	40	80	120	45	45	45	45	45	45	45	45	45	45	45	45
oil/gas	Italy	Europe	Southern Europe	Priolo Gargallo power station	1			360	operating	2010		ISCC	NG/S					Enel Produzione SpA [100.0%]	Enel SpA [100.0%]	37.14	15.2159	exact	Priolo Gargallo			Syracuse	https://www.gem.wiki/Priolo_Gargallo_power_station	L100000400422	G100000400422	IT0003128367	1	743		14	2050	2090	2130	360	360	360	360	360	360	360	360	360	360	360	360
oil/gas	Italy	Europe	Southern Europe	Priolo Gargallo power station	2			383	operating	2010		ISCC	NG/S					Enel Produzione SpA [100.0%]	Enel SpA [100.0%]	37.14	15.2159	exact	Priolo Gargallo			Syracuse	https://www.gem.wiki/Priolo_Gargallo_power_station	L100000400422	G100000400423	IT0003128367	1	743	743	14	2050	2090	2130	383	383	383	383	383	383	383	383	383	383	383	383
oil/gas	Chile	Americas	Latin America and the Caribbean	Quintero power station	1	Termoeléctrica Quintero		128	operating	2009		GT	NG/D					Enel Generación Chile SA [100%]	Enel Generación Chile SA [100.0%]	-32.7875	-71.4858	exact	Quintero			Valparaíso	https://gem.wiki/Quintero_power_station	L100000406560	G100000406722	IT0003128367	1	255		15	2049	2089	2129	128	128	128	128	128	128	128	128	128	128	128	128
oil/gas	Chile	Americas	Latin America and the Caribbean	Quintero power station	2	Termoeléctrica Quintero		127	operating	2009		GT	NG/D					Enel Generación Chile SA [100%]	Enel Generación Chile SA [100.0%]	-32.7875	-71.4858	exact	Quintero			Valparaíso	https://gem.wiki/Quintero_power_station	L100000406560	G100000406721	IT0003128367	1	255	255	15	2049	2089	2129	127	127	127	127	127	127	127	127	127	127	127	127
oil/gas	Italy	Europe	Southern Europe	Rossano power station	1			112	operating	1995		GT	NG					Enel SpA [100.0%]	Enel SpA [100.0%]	39.6218	16.6084	exact	Rossano			Cosenza	https://www.gem.wiki/Rossano_power_station	L100000400430	G100000400430	IT0003128367	1	224		29	2035	2075	2115	112	112	112	112	112	112	112	112	112	112	112	112
oil/gas	Italy	Europe	Southern Europe	Rossano power station	3			112	operating	1996		GT	NG					Enel SpA [100.0%]	Enel SpA [100.0%]	39.6218	16.6084	exact	Rossano			Cosenza	https://www.gem.wiki/Rossano_power_station	L100000400430	G100000400431	IT0003128367	1	224	224	28	2036	2076	2116	112	112	112	112	112	112	112	112	112	112	112	112
oil/gas	Spain	Europe	Southern Europe	Rossello Mill power station	1			23	operating	1998		GT	NG					Enel Green Power SpA [100.0%]	Enel SpA [100.0%]	41.6942	0.59499	approximate	Rossello			Lleida	https://www.gem.wiki/Rossello_Mill_power_station	L100000400706	G100000400706	IT0003128367	1	23	23	26	2038	2078	2118	23	23	23	23	23	23	23	23	23	23	23	23
oil/gas	Chile	Americas	Latin America and the Caribbean	San Isidro power station (Chile)	I	Planta Eléctrica San Isidro		372	operating	1998		CC	NG/D					Enel Generación Chile SA [100%]	Enel Generación Chile SA [100.0%]	-32.936	-71.315	exact	Quillota			Valparaíso	https://gem.wiki/San_Isidro_power_station_(Chile)	L100000406562	G100000406719	IT0003128367	1	752		26	2038	2078	2118	372	372	372	372	372	372	372	372	372	372	372	372
oil/gas	Chile	Americas	Latin America and the Caribbean	San Isidro power station (Chile)	II	Planta Eléctrica San Isidro		380	operating	2008		CC	NG/D					Enel Generación Chile SA [100%]	Enel Generación Chile SA [100.0%]	-32.936	-71.315	exact	Quillota			Valparaíso	https://gem.wiki/San_Isidro_power_station_(Chile)	L100000406562	G100000406720	IT0003128367	1	752	752	16	2048	2088	2128	380	380	380	380	380	380	380	380	380	380	380	380
oil/gas	Italy	Europe	Southern Europe	Santa Barbara power station	1			392	operating	2006		CC	NG					Enel SpA [100.0%]	Enel SpA [100.0%]	43.565	11.4777	exact	Meleto Valdarno			Arezzo	https://www.gem.wiki/Santa_Barbara_power_station	L100000400436	G100000400436	IT0003128367	1	392	392	18	2046	2086	2126	392	392	392	392	392	392	392	392	392	392	392	392
oil/gas	Peru	Americas	Latin America and the Caribbean	Santa Rosa power station	TG-7	Central Termoeléctrica Santa Rosa		128	operating	2005		GT	NG/D					Enel Generación Perú SAA [100%]	Enel Generación Perú SAA [100.0%]	-12.0395	-77.0106	exact	Cercado de Lima		Lima	Lima	https://gem.wiki/Santa_Rosa_power_station	L100000406612	G100000406644	IT0003128367	1	448		19	2045	2085	2125	128	128	128	128	128	128	128	128	128	128	128	128
oil/gas	Peru	Americas	Latin America and the Caribbean	Santa Rosa power station	TG-5	Central Termoeléctrica Santa Rosa		60	operating	2009		GT	D/NG					Enel Generación Perú SAA [100%]	Enel Generación Perú SAA [100.0%]	-12.0395	-77.0106	exact	Cercado de Lima		Lima	Lima	https://gem.wiki/Santa_Rosa_power_station	L100000406612	G100000406646	IT0003128367	1	448		15	2049	2089	2129	60	60	60	60	60	60	60	60	60	60	60	60
oil/gas	Peru	Americas	Latin America and the Caribbean	Santa Rosa power station	TG-6	Central Termoeléctrica Santa Rosa		60	operating	2009		GT	D/NG					Enel Generación Perú SAA [100%]	Enel Generación Perú SAA [100.0%]	-12.0395	-77.0106	exact	Cercado de Lima		Lima	Lima	https://gem.wiki/Santa_Rosa_power_station	L100000406612	G100000406645	IT0003128367	1	448		15	2049	2089	2129	60	60	60	60	60	60	60	60	60	60	60	60
oil/gas	Peru	Americas	Latin America and the Caribbean	Santa Rosa power station	TG-8	Central Termoeléctrica Santa Rosa		200	operating	2009		GT	NG					Enel Generación Perú SAA [100%]	Enel Generación Perú SAA [100.0%]	-12.0395	-77.0106	exact	Cercado de Lima		Lima	Lima	https://gem.wiki/Santa_Rosa_power_station	L100000406612	G100000406643	IT0003128367	1	448	448	15	2049	2089	2129	200	200	200	200	200	200	200	200	200	200	200	200
oil/gas	Chile	Americas	Latin America and the Caribbean	Taltal power station	1	Termoeléctrica Taltal		120	operating	2000		GT	NG/D					Enel Generación Chile SA [100%]	Enel Generación Chile SA [100.0%]	-24.9888	-70.466	exact	Taltal			Antofagasta	https://gem.wiki/Taltal_power_station	L100000406563	G100000406718	IT0003128367	1	240		24	2040	2080	2120	120	120	120	120	120	120	120	120	120	120	120	120
oil/gas	Chile	Americas	Latin America and the Caribbean	Taltal power station	2	Termoeléctrica Taltal		120	operating	2000		GT	NG/D					Enel Generación Chile SA [100%]	Enel Generación Chile SA [100.0%]	-24.9888	-70.466	exact	Taltal			Antofagasta	https://gem.wiki/Taltal_power_station	L100000406563	G100000406717	IT0003128367	1	240	240	24	2040	2080	2120	120	120	120	120	120	120	120	120	120	120	120	120
oil/gas	Italy	Europe	Southern Europe	Termini Imerese power station	Ti6		Ettore Majorana Power Plant	735	operating	2004		CC	NG					Enel SpA [100.0%]	Enel SpA [100.0%]	37.968	13.7508	exact	Termini Imerese			Palermo	https://www.gem.wiki/Termini_Imerese_power_station	L100000400461	G100000400464	IT0003128367	1	1521		20	2044	2084	2124	735	735	735	735	735	735	735	735	735	735	735	735
oil/gas	Italy	Europe	Southern Europe	Termini Imerese power station	1		Ettore Majorana Power Plant	150	pre-construction	2024		GT	NG					Enel SpA [100.0%]	Enel SpA [100.0%]	37.968	13.7508	exact	Termini Imerese			Palermo	https://www.gem.wiki/Termini_Imerese_power_station	L100000400461	G100000410765	IT0003128367	1	1521		0	2064	2104	2144	0	0	0	0	150	150	150	150	150	150	150	150
oil/gas	Italy	Europe	Southern Europe	Termini Imerese power station	2		Ettore Majorana Power Plant	150	pre-construction	2024		GT	NG					Enel SpA [100.0%]	Enel SpA [100.0%]	37.968	13.7508	exact	Termini Imerese			Palermo	https://www.gem.wiki/Termini_Imerese_power_station	L100000400461	G100000410764	IT0003128367	1	1521		0	2064	2104	2144	0	0	0	0	150	150	150	150	150	150	150	150
oil/gas	Italy	Europe	Southern Europe	Termini Imerese power station	Ti41		Ettore Majorana Power Plant	250	mothballed		2023	CC	NG					Enel SpA [100.0%]	Enel SpA [100.0%]	37.968	13.7508	exact	Termini Imerese			Palermo	https://www.gem.wiki/Termini_Imerese_power_station	L100000400461	G100000400461	IT0003128367	1	1521		-99	40	80	120	0	0	0	0	0	0	0	0	0	0	0	0
oil/gas	Italy	Europe	Southern Europe	Termini Imerese power station	Ti53		Ettore Majorana Power Plant	118	mothballed		2023	GT	NG					Enel SpA [100.0%]	Enel SpA [100.0%]	37.968	13.7508	exact	Termini Imerese			Palermo	https://www.gem.wiki/Termini_Imerese_power_station	L100000400461	G100000400462	IT0003128367	1	1521		-99	40	80	120	0	0	0	0	0	0	0	0	0	0	0	0
oil/gas	Italy	Europe	Southern Europe	Termini Imerese power station	Ti54		Ettore Majorana Power Plant	118	mothballed		2023	GT	NG					Enel SpA [100.0%]	Enel SpA [100.0%]	37.968	13.7508	exact	Termini Imerese			Palermo	https://www.gem.wiki/Termini_Imerese_power_station	L100000400461	G100000400463	IT0003128367	1	1521	1521	-99	40	80	120	0	0	0	0	0	0	0	0	0	0	0	0
oil/gas	Peru	Americas	Latin America and the Caribbean	Ventanilla power station	TG3-TG4-TV7	Central Termoeléctrica Ventanilla		524	operating	2006		CC	NG/D					Enel Generación Perú SAA [100%]	Enel Generación Perú SAA [100.0%]	-11.9358	-77.118	exact	Ventanilla		Callao	Callao	https://gem.wiki/Ventanilla_power_station	L100000406616	G100000406641	IT0003128367	1	524	524	18	2046	2086	2126	524	524	524	524	524	524	524	524	524	524	524	524
geothermal	Italy	Europe	Southern Europe	Bagnore geothermal power plant	4	Centrale geotermica Bagnore		40	operating	2014		dry steam						Enel Green Power [100%]		42.8416	11.5588	exact		Grosseto		Tuscany	https://gem.wiki/Bagnore_geothermal_power_plant	L100000700007	G100000700012	IT0003128367	1	40	40	10	2054	2094	2134	40	40	40	40	40	40	40	40	40	40	40	40
geothermal	Chile	Americas	Latin America and the Caribbean	Cerro Pabellón geothermal power plant	1	Central geotérmica Cerro Pabellón		24	operating	2017		binary cycle						Empresa Nacional del Petróleo [50%]; Enel Chile [50%]		-21.8576	-68.1515	exact	Ollagüe	Provincia de El Loa		Antofagasta Region	https://gem.wiki/Cerro_Pabellón_geothermal_power_plant	L100000700026	G100000700326	IT0003128367	0.5	81		7	2057	2097	2137	12	12	12	12	12	12	12	12	12	12	12	12
geothermal	Chile	Americas	Latin America and the Caribbean	Cerro Pabellón geothermal power plant	2	Central geotérmica Cerro Pabellón		24	operating	2017		binary cycle						Empresa Nacional del Petróleo [50%]; Enel Chile [50%]		-21.8576	-68.1515	exact	Ollagüe	Provincia de El Loa		Antofagasta Region	https://gem.wiki/Cerro_Pabellón_geothermal_power_plant	L100000700026	G100000700327	IT0003128367	0.5	81		7	2057	2097	2137	12	12	12	12	12	12	12	12	12	12	12	12
geothermal	Chile	Americas	Latin America and the Caribbean	Cerro Pabellón geothermal power plant	3	Central geotérmica Cerro Pabellón		33	operating	2021		binary cycle						Empresa Nacional del Petróleo [50%]; Enel Chile [50%]		-21.8576	-68.1515	exact	Ollagüe	Provincia de El Loa		Antofagasta Region	https://gem.wiki/Cerro_Pabellón_geothermal_power_plant	L100000700026	G100000700037	IT0003128367	0.5	81	81	3	2061	2101	2141	0	16.5	16.5	16.5	16.5	16.5	16.5	16.5	16.5	16.5	16.5	16.5
geothermal	Italy	Europe	Southern Europe	Farinello geothermal power plant	--	Centrale geotermica Farinello		60	operating	1995		dry steam						Enel Green Power [100%]		43.2388	10.9047	exact		Pisa		Tuscany	https://gem.wiki/Farinello_geothermal_power_plant	L100000700051	G100000700079	IT0003128367	1	60	60	29	2035	2075	2115	60	60	60	60	60	60	60	60	60	60	60	60
geothermal	Italy	Europe	Southern Europe	Nuova Radicondoli geothermal power plant	--	Centrale geotermica Nuova Radicondoli		40	operating	2002		dry steam						Enel Green Power [100%]		43.1935	11.0446	exact		Siena		Tuscany	https://gem.wiki/Nuova_Radicondoli_geothermal_power_plant	L100000700126	G100000700206	IT0003128367	1	40		22	2042	2082	2122	40	40	40	40	40	40	40	40	40	40	40	40
geothermal	Italy	Europe	Southern Europe	Nuova San Martino geothermal power plant	--	Centrale geotermica Nuova San Martino		40	operating	2005		dry steam						Enel Green Power [100%]		43.1452	10.8325	exact		Grosseto		Tuscany	https://gem.wiki/Nuova_San_Martino_geothermal_power_plant	L100000700127	G100000700207	IT0003128367	1	40	40	19	2045	2085	2125	40	40	40	40	40	40	40	40	40	40	40	40
geothermal	Italy	Europe	Southern Europe	Nuova Serrazzano geothermal power plant	--	Centrale geotermica Nuova Serrazzano		60	operating	2002		dry steam						Enel Green Power [100%]		43.204	10.8003	exact		Pisa		Tuscany	https://gem.wiki/Nuova_Serrazzano_geothermal_power_plant	L100000700128	G100000700208	IT0003128367	1	60	60	22	2042	2082	2122	60	60	60	60	60	60	60	60	60	60	60	60
geothermal	Italy	Europe	Southern Europe	Travale geothermal power plant	4	Centrale geotermica Travale		40	operating	2002		dry steam						Enel Green Power [100%]		43.1708	11.039	exact		Grosseto		Tuscany	https://gem.wiki/Travale_geothermal_power_plant	L100000700180	G100000700299	IT0003128367	1	40	40	22	2042	2082	2122	40	40	40	40	40	40	40	40	40	40	40	40
geothermal	Italy	Europe	Southern Europe	Valle Secolo geothermal power plant	1	Centrale geotermica di Larderello Valle Secolo		60	operating	1991		dry steam						Enel Green Power [100%]		42.2362	10.8674	exact		Grosseto		Tuscany	https://gem.wiki/Valle_Secolo_geothermal_power_plant	L100000700186	G100000700310	IT0003128367	1	120		33	2031	2071	2111	60	60	60	60	60	60	60	60	60	60	60	60
geothermal	Italy	Europe	Southern Europe	Valle Secolo geothermal power plant	2	Centrale geotermica di Larderello Valle Secolo		60	operating	1991		dry steam						Enel Green Power [100%]		42.2362	10.8674	exact		Grosseto		Tuscany	https://gem.wiki/Valle_Secolo_geothermal_power_plant	L100000700186	G100000700311	IT0003128367	1	120	120	33	2031	2071	2111	60	60	60	60	60	60	60	60	60	60	60	60
hydropower	Chile	Americas	Latin America and the Caribbean	Abanico hydroelectric plant (Chile)		Central Hidroeléctrica Abanico		136	operating	1948		run-of-river				TRUE	FALSE	Enel Generación Chile SA		-37.3646	-71.4894	exact				Biobío Region	https://gem.wiki/Abanico_hydroelectric_plant_(Chile)	L600544	G600545	IT0003128367	1	136	136	76	1988	2028	2068	136	136	136	136	136	136	136	136	136	136	136	136
hydropower	Italy	Europe	Southern Europe	Anapo hydroelectric plant			Anapo C.Le	500	operating	1989		pumped storage				TRUE	FALSE	Enel SPA		37.1101	15.1493	exact		Siracusa		Sicily	https://gem.wiki/Anapo_hydroelectric_plant	L602191	G602217	IT0003128367	1	500	500	35	2029	2069	2109	500	500	500	500	500	500	500	500	500	500	500	500
hydropower	Chile	Americas	Latin America and the Caribbean	Antuco hydroelectric plant		Central Hidroeléctrica Antuco		320	operating	1981		conventional storage				TRUE	FALSE	Enel Generación Chile SA		-37.3103	-71.6264	exact				Biobío Region	https://gem.wiki/Antuco_hydroelectric_plant	L600548	G600549	IT0003128367	1	320	320	43	2021	2061	2101	320	320	320	320	320	320	320	320	320	320	320	320
hydropower	Argentina	Americas	Latin America and the Caribbean	Arroyito hydroelectric plant		Central Hidroeléctrica Arroyito		128	operating	1983		conventional storage				TRUE	FALSE	Enel Generación		-39.1067	-68.5857	exact			Departamento Confluencia	Neuquén Province	https://gem.wiki/Arroyito_hydroelectric_plant	L600020	G600020	IT0003128367	1	128	128	41	2023	2063	2103	128	128	128	128	128	128	128	128	128	128	128	128
hydropower	Italy	Europe	Southern Europe	Bargi hydroelectric plant (Italy)			Bargi Psp, Bargi Centrale	281	operating	1975		pumped storage				TRUE	FALSE	Enel SPA		44.1167	11.043	exact		Bologna		Emilia-Romagna	https://gem.wiki/Bargi_hydroelectric_plant_(Italy)	L602193	G602219	IT0003128367	1	281	281	49	2015	2055	2095	281	281	281	281	281	281	281	281	281	281	281	281
hydropower	Colombia	Americas	Latin America and the Caribbean	Betania hydroelectric plant		Central Hidroeléctrica Betania	Betania Huila	540	operating	1987		conventional storage				TRUE	FALSE	Enel Generación		2.7082	-75.4298	exact		Hobo	Norte	Huila	https://gem.wiki/Betania_hydroelectric_plant	L601398	G601416	IT0003128367	1	540	540	37	2027	2067	2107	540	540	540	540	540	540	540	540	540	540	540	540
hydropower	Brazil	Americas	Latin America and the Caribbean	Cachoeira Dourada hydroelectric plant		Usina Hidrelétrica Cachoeira Dourada		658	operating	1959		run-of-river				TRUE	FALSE	Enel Green Power		-18.5043	-49.4902	exact			Região Geográfica Intermediária de Uberlândia	Minas Gerais	https://gem.wiki/Cachoeira_Dourada_hydroelectric_plant	L600226	G600226	IT0003128367	1	658	658	65	1999	2039	2079	658	658	658	658	658	658	658	658	658	658	658	658
hydropower	Italy	Europe	Southern Europe	Capriati hydroelectric plant			Capriati (Lete Sava)	113	operating	1966		pumped storage				TRUE	FALSE	Enel SPA		41.4763	14.1282	exact		Caserta		Campania	https://gem.wiki/Capriati_hydroelectric_plant	L602197	G602223	IT0003128367	1	113	113	58	2006	2046	2086	113	113	113	113	113	113	113	113	113	113	113	113
hydropower	Italy	Europe	Southern Europe	Castrocucco hydroelectric plant			Masseria Nicodemo	83	operating	1973		conventional storage				TRUE	FALSE	Enel SPA		39.9896	15.8081	exact		Cosenza		Calabria	https://gem.wiki/Castrocucco_hydroelectric_plant	L602200	G602226	IT0003128367	1	83	83	51	2013	2053	2093	83	83	83	83	83	83	83	83	83	83	83	83
hydropower	Peru	Americas	Latin America and the Caribbean	Chimay hydroelectric plant		Central Hidroeléctrica Chimay	Junín	152	operating	2000		conventional storage				TRUE	FALSE	Enel Generación Perú		-11.3248	-75.3006	exact				Junín	https://gem.wiki/Chimay_hydroelectric_plant	L603090	G603125	IT0003128367	1	152	152	24	2040	2080	2120	152	152	152	152	152	152	152	152	152	152	152	152
hydropower	Argentina	Americas	Latin America and the Caribbean	Chocón hydroelectric plant		Central Hidroeléctrica El Chocón		1200	operating	1972		conventional storage				TRUE	FALSE	Enel Generación		-39.2653	-68.7556	exact			Departamento Confluencia	Neuquén Province	https://gem.wiki/Chocón_hydroelectric_plant	L600025	G600025	IT0003128367	1	1200	1200	52	2012	2052	2092	1200	1200	1200	1200	1200	1200	1200	1200	1200	1200	1200	1200
hydropower	Slovakia	Europe	Eastern Europe	Čierny Váh hydroelectric plant				734	operating	1982		pumped storage				TRUE	FALSE	Slovak Republic [34%]; EP Slovakia [33%]; Enel SPA [33%]		49.0088	19.9121	exact		District of Liptovský Mikuláš		Region of Žilina	https://gem.wiki/Čierny_Váh_hydroelectric_plant	L603306	G603341	IT0003128367	0.33	734	734	42	2022	2062	2102	242.22	242.22	242.22	242.22	242.22	242.22	242.22	242.22	242.22	242.22	242.22	242.22
hydropower	Chile	Americas	Latin America and the Caribbean	Cipreses hydroelectric plant		Central Hidroeléctrica Cipreses		106	operating			conventional storage				TRUE	FALSE	Enel Generación Chile SA		-35.7872	-70.8084	exact				Maule Region	https://gem.wiki/Cipreses_hydroelectric_plant	L600551	G600552	IT0003128367	1	106	106	-99	40	80	120	106	106	106	106	106	106	106	106	106	106	106	106
hydropower	Colombia	Americas	Latin America and the Caribbean	Dario Valencia hydroelectric plant		Central Hidroeléctrica Dario Valencia	Dario Valencia Samper	150	operating	1973		conventional storage				TRUE	FALSE	Enel Generación		4.602	-74.4315	exact				Cundinamarca	https://gem.wiki/Dario_Valencia_hydroelectric_plant	L601405	G601423	IT0003128367	1	150	150	51	2013	2053	2093	150	150	150	150	150	150	150	150	150	150	150	150
hydropower	Italy	Europe	Southern Europe	Edolo hydroelectric plant				950	operating			pumped storage				TRUE	FALSE	Enel SPA		46.1721	10.3442	exact		Brescia		Lombardy	https://gem.wiki/Edolo_hydroelectric_plant	L602202	G602228	IT0003128367	1	950	950	-99	40	80	120	950	950	950	950	950	950	950	950	950	950	950	950
hydropower	Colombia	Americas	Latin America and the Caribbean	El Paraiso hydroelectric plant		Central Hidroeléctrica El Paraiso		276	operating	1986		conventional storage				TRUE	FALSE	Enel Generación		4.5717	-74.4015	approximate			Mesitas del Colegio	Cundimarca	https://gem.wiki/El_Paraiso_hydroelectric_plant	L601406	G601424	IT0003128367	1	276	276	38	2026	2066	2106	276	276	276	276	276	276	276	276	276	276	276	276
hydropower	Colombia	Americas	Latin America and the Caribbean	El Quimbo hydroelectric plant		Central Hidroeléctrica El Quimbo		396	operating	2015		conventional storage				TRUE	FALSE	Enel Generación		2.4507	-75.565	exact			Occidente	Huila	https://gem.wiki/El_Quimbo_hydroelectric_plant	L601407	G601425	IT0003128367	1	396	396	9	2055	2095	2135	396	396	396	396	396	396	396	396	396	396	396	396
hydropower	Chile	Americas	Latin America and the Caribbean	El Toro hydroelectric plant		Central Hidroeléctrica El Toro		450	operating	1973		conventional storage				TRUE	FALSE	Enel Generación Chile SA		-37.2934	-71.4924	exact				Biobío Region	https://gem.wiki/El_Toro_hydroelectric_plant	L600554	G600555	IT0003128367	1	450	450	51	2013	2053	2093	450	450	450	450	450	450	450	450	450	450	450	450
hydropower	Italy	Europe	Southern Europe	Entracque Chro hydroelectric plant			L Einaudi (Chiotas)	1064	operating			pumped storage				TRUE	FALSE	Enel SPA		44.2299	7.3908	exact		Cuneo		Piedmont	https://gem.wiki/Entracque_Chro_hydroelectric_plant	L602203	G602229	IT0003128367	1	1064	1064	-99	40	80	120	1064	1064	1064	1064	1064	1064	1064	1064	1064	1064	1064	1064
hydropower	Italy	Europe	Southern Europe	Entracque Rovina hydroelectric plant			L Einaudi (Rovina)	125	operating	1982		pumped storage				TRUE	FALSE	Enel SPA		44.2299	7.3908	exact		Cuneo		Piedmont	https://gem.wiki/Entracque_Rovina_hydroelectric_plant	L602204	G602230	IT0003128367	1	125	125	42	2022	2062	2102	125	125	125	125	125	125	125	125	125	125	125	125
hydropower	Italy	Europe	Southern Europe	Fadalto hydroelectric plant				220	operating			pumped storage				TRUE	FALSE	Enel SPA		46.0692	12.3299	exact		Treviso		Veneto	https://gem.wiki/Fadalto_hydroelectric_plant	L602205	G602231	IT0003128367	1	220	220	-99	40	80	120	220	220	220	220	220	220	220	220	220	220	220	220
hydropower	Panama	Americas	Latin America and the Caribbean	Fortuna hydroelectric plant		Central Hidroeléctrica Fortuna	Edwin Fabrega	300	operating	1984		conventional storage				TRUE	FALSE	Enel Green Power		8.679	-82.2626	exact	Hornito	Distrito Gualaca		Chiriquí	https://gem.wiki/Fortuna_hydroelectric_plant	L603071	G603105	IT0003128367	1	300	300	40	2024	2064	2104	300	300	300	300	300	300	300	300	300	300	300	300
hydropower	Slovakia	Europe	Eastern Europe	Gabčíkovo hydroelectric plant				720	operating	1992		run-of-river				TRUE	FALSE	Slovak Republic [34%]; EP Slovakia [33%]; Enel SPA [33%]		47.8801	17.5388	exact		District of Dunajská Streda		Region of Trnava	https://gem.wiki/Gabčíkovo_hydroelectric_plant	L603307	G603342	IT0003128367	0.33	720	720	32	2032	2072	2112	237.6	237.6	237.6	237.6	237.6	237.6	237.6	237.6	237.6	237.6	237.6	237.6
hydropower	Italy	Europe	Southern Europe	Galleto hydroelectric plant			Galleto M San Angelo	295	operating	1929		run-of-river				TRUE	FALSE	Enel SPA		42.5527	12.699	exact	Terni	Terni		Umbria	https://gem.wiki/Galleto_hydroelectric_plant	L602206	G602232	IT0003128367	1	295	295	95	1969	2009	2049	295	295	295	295	295	295	295	295	295	295	295	295
hydropower	Italy	Europe	Southern Europe	Gargnano hydroelectric plant			Villa Gargnano	137	operating			pumped storage				TRUE	FALSE	Enel SPA		45.7039	10.6863	exact		Brescia		Lombardy	https://gem.wiki/Gargnano_hydroelectric_plant	L602207	G602233	IT0003128367	1	137	137	-99	40	80	120	137	137	137	137	137	137	137	137	137	137	137	137
hydropower	Colombia	Americas	Latin America and the Caribbean	Guaca hydroelectric plant		Central Hidroeléctrica Guaca		324	operating	1985		run-of-river				TRUE	FALSE	Grupo Energía Bogotá [51.51%]; Enel Generación [48.48%]		4.5899	-74.4601	exact			Tequendama		https://gem.wiki/Guaca_hydroelectric_plant	L601410	G601428	IT0003128367	0.4848	324	324	39	2025	2065	2105	157.075	157.075	157.075	157.075	157.075	157.075	157.075	157.075	157.075	157.075	157.075	157.075
hydropower	Italy	Europe	Southern Europe	Guadalami hydroelectric plant			Guadalami C.le	80	operating	1961		pumped storage				TRUE	FALSE	Enel SPA		37.9555	13.2793	exact		Palermo		Sicily	https://gem.wiki/Guadalami_hydroelectric_plant	L602209	G602235	IT0003128367	1	80	80	63	2001	2041	2081	80	80	80	80	80	80	80	80	80	80	80	80
hydropower	Colombia	Americas	Latin America and the Caribbean	Guavio hydroelectric plant		Central Hidroeléctrica Guavio		1250	operating	1990		conventional storage				TRUE	FALSE	Enel Generación		4.7247	-73.4831	exact			Ubalá	Cundimarca	https://gem.wiki/Guavio_hydroelectric_plant	L601414	G601432	IT0003128367	1	1250	1250	34	2030	2070	2110	1250	1250	1250	1250	1250	1250	1250	1250	1250	1250	1250	1250
hydropower	Peru	Americas	Latin America and the Caribbean	Huinco hydroelectric plant		Central Hidroeléctrica Huinco		258	operating	1964		conventional storage				TRUE	FALSE	Enel Generación Perú		-11.7645	-76.6153	exact	San Antonio			Lima	https://gem.wiki/Huinco_hydroelectric_plant	L603097	G603132	IT0003128367	1	258	258	60	2004	2044	2084	258	258	258	258	258	258	258	258	258	258	258	258
hydropower	Italy	Europe	Southern Europe	Isola Serafiini hydroelectric plant				82	operating	1962		run-of-river				TRUE	FALSE	Enel SPA		45.0936	9.9046	exact		Piacenza		Emilia-Romagna	https://gem.wiki/Isola_Serafiini_hydroelectric_plant	L602210	G602236	IT0003128367	1	82	82	62	2002	2042	2082	82	82	82	82	82	82	82	82	82	82	82	82
hydropower	Italy	Europe	Southern Europe	Lanzada hydroelectric plant				350	operating			run-of-river				TRUE	FALSE	Enel SPA		46.2685	9.876	exact		Sondrio		Lombardy	https://gem.wiki/Lanzada_hydroelectric_plant	L602212	G602238	IT0003128367	1	350	350	-99	40	80	120	350	350	350	350	350	350	350	350	350	350	350	350
hydropower	Slovakia	Europe	Eastern Europe	Liptovská Mara hydroelectric plant				198	operating	1975		conventional storage				TRUE	FALSE	Slovak Republic [34%]; EP Slovakia [33%]; Enel SPA [33%]		49.0967	19.4841	exact		District of Liptovský Mikuláš		Region of Žilina	https://gem.wiki/Liptovská_Mara_hydroelectric_plant	L603309	G603344	IT0003128367	0.33	198	198	49	2015	2055	2095	65.34	65.34	65.34	65.34	65.34	65.34	65.34	65.34	65.34	65.34	65.34	65.34
hydropower	Chile	Americas	Latin America and the Caribbean	Los Cóndores hydroelectric plant		Central Hidroeléctrica Los Cóndores		153	construction	2023		run-of-river				TRUE	FALSE	Enel Generación Chile SA		-35.9169	-70.6293	exact				Maule Region	https://gem.wiki/Los_Cóndores_hydroelectric_plant	L600563	G600564	IT0003128367	1	153	153	1	2063	2103	2143	0	0	0	153	153	153	153	153	153	153	153	153
hydropower	Peru	Americas	Latin America and the Caribbean	Matucana hydroelectric plant		Central Hidroeléctrica Matucana	San Jerónimo de Surco	120	operating	1972		run-of-river				TRUE	FALSE	Enel Generación Perú		-11.8865	-76.4556	exact	Surco			Lima	https://gem.wiki/Matucana_hydroelectric_plant	L603104	G603139	IT0003128367	1	120	120	52	2012	2052	2092	120	120	120	120	120	120	120	120	120	120	120	120
hydropower	Italy	Europe	Southern Europe	Montorio hydroelectric plant				110	operating	1954		run-of-river				TRUE	FALSE	Enel SPA		42.5858	13.7089	exact		Teramo		Abruzzo	https://gem.wiki/Montorio_hydroelectric_plant	L602214	G602240	IT0003128367	1	110	110	70	1994	2034	2074	110	110	110	110	110	110	110	110	110	110	110	110
hydropower	Italy	Europe	Southern Europe	Mucone I hydroelectric plant			Mucone 1S; Mucone I Salto	169	operating			run-of-river				TRUE	FALSE	Enel SPA		39.4716	16.4056	exact		Cosenza		Calabria	https://gem.wiki/Mucone_I_hydroelectric_plant	L602215	G602241	IT0003128367	1	169	169	-99	40	80	120	169	169	169	169	169	169	169	169	169	169	169	169
hydropower	Guatemala	Americas	Latin America and the Caribbean	Palo Viejo hydroelectric plant		Central Hidroeléctrica Palo Viejo		87	operating	2012		run-of-river				TRUE	FALSE	Enel Green Power		15.5047	-90.886	exact		Chajul		Quiché	https://gem.wiki/Palo_Viejo_hydroelectric_plant	L601771	G601790	IT0003128367	1	87	87	12	2052	2092	2132	87	87	87	87	87	87	87	87	87	87	87	87
hydropower	Chile	Americas	Latin America and the Caribbean	Pangue hydroelectric plant		Central Hidroeléctrica Pangue		467	operating	1996		conventional storage				TRUE	FALSE	Enel Generación Chile SA		-37.9099	-71.6087	exact				Biobío Region	https://gem.wiki/Pangue_hydroelectric_plant	L600568	G600569	IT0003128367	1	467	467	28	2036	2076	2116	467	467	467	467	467	467	467	467	467	467	467	467
hydropower	Chile	Americas	Latin America and the Caribbean	Pehuenche hydroelectric plant		Central Hidroeléctrica Pehuenche		570	operating	1991		conventional storage				TRUE	FALSE	Enel Generación Chile SA		-35.7338	-71.1555	exact				Maule Region	https://gem.wiki/Pehuenche_hydroelectric_plant	L600569	G600570	IT0003128367	1	570	570	33	2031	2071	2111	570	570	570	570	570	570	570	570	570	570	570	570
hydropower	Italy	Europe	Southern Europe	Presenzano hydroelectric plant			Domenico Cimarosa	985	operating	1991		pumped storage				TRUE	FALSE	Enel SPA		41.3854	14.0929	exact		Caserta		Campania	https://gem.wiki/Presenzano_hydroelectric_plant	L602220	G602246	IT0003128367	1	985	985	33	2031	2071	2111	985	985	985	985	985	985	985	985	985	985	985	985
hydropower	Italy	Europe	Southern Europe	Provvidenza hydroelectric plant				139	operating	1962		pumped storage				TRUE	FALSE	Enel SPA		42.5113	13.4104	exact	L'Aquila	L'Aquila		Abruzzo	https://gem.wiki/Provvidenza_hydroelectric_plant	L602221	G602247	IT0003128367	1	139	139	62	2002	2042	2082	139	139	139	139	139	139	139	139	139	139	139	139
hydropower	Chile	Americas	Latin America and the Caribbean	Ralco hydroelectric plant		Central Hidroeléctrica Ralco		690	operating	2004		conventional storage				TRUE	FALSE	Enel Generación Chile SA		-37.9969	-71.5199	exact				Biobío Region	https://gem.wiki/Ralco_hydroelectric_plant	L600572	G600573	IT0003128367	1	690	690	20	2044	2084	2124	690	690	690	690	690	690	690	690	690	690	690	690
hydropower	Chile	Americas	Latin America and the Caribbean	Rapel hydroelectric plant		Central Hidroeléctrica Rapel		377	operating	1968		conventional storage				TRUE	FALSE	Enel Generación Chile SA		-34.0409	-71.5902	exact				Libertador General Bernardo O'Higgins Region	https://gem.wiki/Rapel_hydroelectric_plant	L600573	G600574	IT0003128367	1	377	377	56	2008	2048	2088	377	377	377	377	377	377	377	377	377	377	377	377
hydropower	Italy	Europe	Southern Europe	Roncovalgrande hydroelectric plant				1000	operating	1971		pumped storage				TRUE	FALSE	Enel SPA		46.0694	8.7324	exact	Maccagno con Pino e Veddasca	Varese		Lombardy	https://gem.wiki/Roncovalgrande_hydroelectric_plant	L602223	G602249	IT0003128367	1	1000	1000	53	2011	2051	2091	1000	1000	1000	1000	1000	1000	1000	1000	1000	1000	1000	1000
hydropower	Italy	Europe	Southern Europe	San Fiorano hydroelectric plant			S. Fiorano	268	operating	1973		pumped storage				TRUE	FALSE	Enel SPA		46.0442	10.3521	exact		Brescia		Lombardy	https://gem.wiki/San_Fiorano_hydroelectric_plant	L602225	G602251	IT0003128367	1	268	268	51	2013	2053	2093	268	268	268	268	268	268	268	268	268	268	268	268
hydropower	Italy	Europe	Southern Europe	San Giacomo Sul Vomano hydroelectric plant			S. Giacomo Al Vomano	490	operating			pumped storage				TRUE	FALSE	Enel SPA		42.5607	13.5641	exact		Teramo		Abruzzo	https://gem.wiki/San_Giacomo_Sul_Vomano_hydroelectric_plant	L602227	G602253	IT0003128367	1	490	490	-99	40	80	120	490	490	490	490	490	490	490	490	490	490	490	490
hydropower	Chile	Americas	Latin America and the Caribbean	Sauzal hydroelectric plant		Central Hidroeléctrica Sauzal		80	operating	1948		run-of-river				TRUE	FALSE	Enel Generación Chile SA		-34.2526	-70.6313	exact		Provincia de Cachapoal		O'Higgins Region	https://gem.wiki/Sauzal_hydroelectric_plant	L600578	G600579	IT0003128367	1	80	80	76	1988	2028	2068	80	80	80	80	80	80	80	80	80	80	80	80
hydropower	Italy	Europe	Southern Europe	Sondrio hydroelectric plant				144	operating	1960		unknown				TRUE	FALSE	Enel SPA		46.173	9.8876	exact		Sondrio		Lombardy	https://gem.wiki/Sondrio_hydroelectric_plant	L602231	G602257	IT0003128367	1	144	144	64	2000	2040	2080	144	144	144	144	144	144	144	144	144	144	144	144
hydropower	Italy	Europe	Southern Europe	Soverzene hydroelectric plant			Achille Gaggia	214	operating	1951		conventional storage				TRUE	FALSE	Enel SPA		46.2009	12.3023	exact		Belluno		Veneto	https://gem.wiki/Soverzene_hydroelectric_plant	L602232	G602258	IT0003128367	1	214	214	73	1991	2031	2071	214	214	214	214	214	214	214	214	214	214	214	214
hydropower	Italy	Europe	Southern Europe	Taloro hydroelectric plant			Taloro 1	240	operating	1978		pumped storage				TRUE	FALSE	Enel SPA		40.1278	9.1409	exact		Nuoro		Sardinia	https://gem.wiki/Taloro_hydroelectric_plant	L602235	G602261	IT0003128367	1	240	240	46	2018	2058	2098	240	240	240	240	240	240	240	240	240	240	240	240
hydropower	Italy	Europe	Southern Europe	Venaus hydroelectric plant			Venaus Mont-Cenis	230	operating	1967		conventional storage				TRUE	FALSE	Enel SPA		45.1617	7.0091	exact		Torino		Piedmont	https://gem.wiki/Venaus_hydroelectric_plant	L602239	G602265	IT0003128367	1	230	230	57	2007	2047	2087	230	230	230	230	230	230	230	230	230	230	230	230
hydropower	Peru	Americas	Latin America and the Caribbean	Veracruz hydroelectric plant		Central Hidroeléctrica Veracruz	Veracruz Marañon	635	shelved			conventional storage				TRUE	FALSE	Enel Generación Perú		-6.2501	-78.8333	approximate		Cutevero	Cutevero	Cajamarca	https://gem.wiki/Veracruz_hydroelectric_plant	L603131	G603166	IT0003128367	1	635	635	-99	40	80	120	0	0	0	0	0	0	0	0	0	0	0	0
hydropower	Brazil	Americas	Latin America and the Caribbean	Volta Grande hydroelectric plant		Usina Hidrelétrica Volta Grande		380	operating	1974		run-of-river				TRUE	FALSE	Enel Green Power		-20.0333	-48.2218	exact			Região Geográfica Intermediária de Ribeirão Preto	São Paulo	https://gem.wiki/Volta_Grande_hydroelectric_plant	L600361	G600362	IT0003128367	1	380	380	50	2014	2054	2094	380	380	380	380	380	380	380	380	380	380	380	380
solar	United States	Americas	Northern America	25 Mile Creek solar farm				250	operating	2023		PV						Enel Green Power SPA		36.487	-99.739	exact		Ellis County		Oklahoma	https://gem.wiki/25_Mile_Creek_solar_farm	L808373	G810564	IT0003128367	1	250	250	1	2063	2103	2143	0	0	0	250	250	250	250	250	250	250	250	250
solar	South Africa	Africa	Sub-Saharan Africa	Adams Aurora solar farm	2		Adams Solar PV 2 Solar Farm	75	operating	2017		PV						Enel Green Power SPA		-27.3656	23.0131	exact	Joe Morolong Local Municipality	John Taolo Gaetsewe District Municipality		Northern Cape	https://gem.wiki/Adams_Aurora_solar_farm	L800007	G800007	IT0003128367	1	75	75	7	2057	2097	2137	75	75	75	75	75	75	75	75	75	75	75	75
solar	Greece	Europe	Southern Europe	Agkinara - Veli solar farm		Αγκιναρα - Βελη		6.5	operating			PV						Enel Green Power Greece SA		37.9001	21.2319	exact		Elis Regional Unit	Western Greece	Peloponnese, Western Greece and the Ionian	https://gem.wiki/Agkinara_-_Veli_solar_farm	L822277	G825326	IT0003128367	1	6.5	6.5	-99	40	80	120	6.5	6.5	6.5	6.5	6.5	6.5	6.5	6.5	6.5	6.5	6.5	6.5
solar	Greece	Europe	Southern Europe	Agrilia Baka solar farm		Αγριλια Μπακα		4.9	operating			PV						Enel Green Power Greece SA		37.084	21.6299	exact	Gargalianoi Municipal Unit	Messenia Regional Unit	Peloponnese Region	Peloponnese, Western Greece and the Ionian	https://gem.wiki/Agrilia_Baka_solar_farm	L822279	G825328	IT0003128367	1	4.9	4.9	-99	40	80	120	4.9	4.9	4.9	4.9	4.9	4.9	4.9	4.9	4.9	4.9	4.9	4.9
solar	Spain	Europe	Southern Europe	Alfajarín solar farm				90	pre-construction			PV						Enel Green Power		41.614	-0.7038	approximate		Zaragoza		Aragon	https://gem.wiki/Alfajarín_solar_farm	L824311	G827421	IT0003128367	1	90	90	-99	40	80	120	0	0	0	0	0	0	0	0	0	0	0	0
solar	Portugal	Europe	Southern Europe	Algarve solar farm				99	announced	2024		PV						Enel Green Power SPA		38.0371	-8.2869	approximate			Ferreira do Alentejo	Algarve	https://gem.wiki/Algarve_solar_farm	L805791	G806665	IT0003128367	1	99	99	0	2064	2104	2144	0	0	0	0	0	0	0	0	0	0	0	0
solar	Spain	Europe	Southern Europe	Aljarafe solar farm				69.6	pre-construction			PV						Enel Green Power		37.4193	-6.1095	approximate	Salteras				https://gem.wiki/Aljarafe_solar_farm	L824316	G827427	IT0003128367	1	69.6	69.6	-99	40	80	120	0	0	0	0	0	0	0	0	0	0	0	0
solar	Greece	Europe	Southern Europe	Avdira Pezoyla solar farm		Αβδηρα Πεζουλα		2.8	operating			PV						Enel Green Power Greece SA		40.9971	24.9493	exact		Xanthi Regional Unit	Eastern Macedonia and Thrace	Macedonia and Thrace	https://gem.wiki/Avdira_Pezoyla_solar_farm	L822310	G825361	IT0003128367	1	2.8	2.8	-99	40	80	120	2.8	2.8	2.8	2.8	2.8	2.8	2.8	2.8	2.8	2.8	2.8	2.8
solar	Greece	Europe	Southern Europe	Axiochori solar farm		Αξιοχωρι		6.2	operating			PV						Enel Green Power Greece SA		40.8592	22.6749	exact		Kilkis Regional Unit	Central Macedonia	Macedonia and Thrace	https://gem.wiki/Axiochori_solar_farm	L822313	G825364	IT0003128367	1	6.2	6.2	-99	40	80	120	6.2	6.2	6.2	6.2	6.2	6.2	6.2	6.2	6.2	6.2	6.2	6.2
solar	Greece	Europe	Southern Europe	Ayios Athanasiou (Enel) solar farm		Ι. Μ. Αγ. Αθανασιου		6	operating			PV						Enel Green Power Greece SA		40.4596	22.4914	exact		Pieria Regional Unit	Central Macedonia	Macedonia and Thrace	https://gem.wiki/Ayios_Athanasiou_(Enel)_solar_farm	L822316	G825368	IT0003128367	1	6	6	-99	40	80	120	6	6	6	6	6	6	6	6	6	6	6	6
solar	Greece	Europe	Southern Europe	Ayios Ioannis - Vamvakies solar farm		Αγιος Ιωαννης - Βαμβακιες		6.5	operating			PV						Enel Green Power Greece SA		40.3706	22.1191	exact		Kozani Regional Unit	Western Macedonia	Epirus and Western Macedonia	https://gem.wiki/Ayios_Ioannis_-_Vamvakies_solar_farm	L822320	G825372	IT0003128367	1	6.5	6.5	-99	40	80	120	6.5	6.5	6.5	6.5	6.5	6.5	6.5	6.5	6.5	6.5	6.5	6.5
solar	Chile	Americas	Latin America and the Caribbean	Azabache Photovoltaic Solar Park	1	Parque Solar Fotovoltaico Azabache		77	operating	2021		PV						Enel Chile		-22.487	-68.822	exact			Calama	Antofagasta	https://gem.wiki/Azabache_Photovoltaic_Solar_Park	L807160	G808392	IT0003128367	1	81.6		3	2061	2101	2141	0	77	77	77	77	77	77	77	77	77	77	77
solar	Chile	Americas	Latin America and the Caribbean	Azabache Photovoltaic Solar Park	Extension	Parque Solar Fotovoltaico Azabache		4.6	construction			PV						Enel Chile		-22.4843	-68.8214	exact	Calama	Provincia de El Loa		Antofagasta Region	https://gem.wiki/Azabache_Photovoltaic_Solar_Park	L807160	G810075	IT0003128367	1	81.6	81.6	-99	40	80	120	0	0	0	0	0	0	0	4.6	4.6	4.6	4.6	4.6
solar	Panama	Americas	Latin America and the Caribbean	Baco solar farm		Parque Solar Baco		25.9	operating	2023		PV						Enel Green Power SPA		8.3844	-82.7862	approximate		Distrito Barú		Chiriquí	https://gem.wiki/Baco_solar_farm	L807731	G809422	IT0003128367	1	25.9	25.9	1	2063	2103	2143	0	0	0	25.9	25.9	25.9	25.9	25.9	25.9	25.9	25.9	25.9
solar	Greece	Europe	Southern Europe	Batzia Bechloule solar farm		Μπατζια - Μπεχλουλε		100	announced			PV						Enel Green Power Greece SA		39.3699	22.7114	exact		Regional Unit of Magnesia	Thessaly	Thessaly and Central Greece	https://gem.wiki/Batzia_Bechloule_solar_farm	L806281	G807216	IT0003128367	1	100	100	-99	40	80	120	0	0	0	0	0	0	0	0	0	0	0	0
solar	United States	Americas	Northern America	Blue Jay Solar			Blue Jay Grimes	210	construction	2023		PV						Enel Green Power SPA		30.7115	-96.0641	exact	Iola	Grimes County		Texas	https://gem.wiki/Blue_Jay_Solar	L805043	G805814	IT0003128367	1	210	210	1	2063	2103	2143	0	0	0	210	210	210	210	210	210	210	210	210
solar	Brazil	Americas	Latin America and the Caribbean	Bom Jesus Da Lapa Solar Park	2	Parque Solar Bom Jesus da Lapa	BJL Solar Park, BJL ENEL	24	operating	2017		PV						Enel Green Power SPA		-13.3191	-43.3504	exact	Bom Jesus da Lapa		Região Geográfica Intermediária de Guanambi	Bahia	https://gem.wiki/Bom_Jesus_Da_Lapa_Solar_Park	L807153	G808350	IT0003128367	1	48		7	2057	2097	2137	24	24	24	24	24	24	24	24	24	24	24	24
solar	Brazil	Americas	Latin America and the Caribbean	Bom Jesus Da Lapa Solar Park	6	Parque Solar Bom Jesus da Lapa	BJL Solar Park, BJL ENEL	24	operating	2017		PV						Enel Green Power SPA		-13.3227	-43.354	exact	Bom Jesus da Lapa		Região Geográfica Intermediária de Guanambi	Bahia	https://gem.wiki/Bom_Jesus_Da_Lapa_Solar_Park	L807153	G808351	IT0003128367	1	48	48	7	2057	2097	2137	24	24	24	24	24	24	24	24	24	24	24	24
solar	Australia	Oceania	Australia and New Zealand	Bouldercombe solar farm				286	pre-construction			PV						Enel Green Power SPA		-23.5272	150.48	exact	Bouldercombe			Queensland	https://gem.wiki/Bouldercombe_solar_farm	L805536	G806375	IT0003128367	1	286	286	-99	40	80	120	0	0	0	0	0	0	0	0	0	0	0	0
solar	Australia	Oceania	Australia and New Zealand	Bungala solar farm	1			138	operating	2018		PV						Enel Green Power SPA [50%]; DIF Capital Partners [50%]		-32.4229	137.841	exact		Port Augusta City Council		South Australia	https://gem.wiki/Bungala_solar_farm	L827481	G830977	IT0003128367	0.5	275		6	2058	2098	2138	69	69	69	69	69	69	69	69	69	69	69	69
solar	Australia	Oceania	Australia and New Zealand	Bungala solar farm	2			137	operating	2019		PV						Enel Green Power SPA [50%]; DIF Capital Partners [50%]		-32.4078	137.84	exact		Port Augusta City Council		South Australia	https://gem.wiki/Bungala_solar_farm	L827481	G830978	IT0003128367	0.5	275	275	5	2059	2099	2139	68.5	68.5	68.5	68.5	68.5	68.5	68.5	68.5	68.5	68.5	68.5	68.5
solar	Spain	Europe	Southern Europe	Calatrava 1 solar farm			Cluster Calatrava	22.3	operating	2022		PV						Enel Green Power		38.9935	-3.3951	approximate		La Mancha	Ciudad Real	Castile-La Mancha	https://gem.wiki/Calatrava_1_solar_farm	L824402	G827529	IT0003128367	1	22.3	22.3	2	2062	2102	2142	0	0	22.3	22.3	22.3	22.3	22.3	22.3	22.3	22.3	22.3	22.3
solar	Romania	Europe	Eastern Europe	Călugareni solar farm			Cef Calugareni	63	pre-construction			PV						Enel Green Power SPA		44.7084	25.8888	approximate	Călugareni	Giurgiu County		Muntenia	https://gem.wiki/Călugareni_solar_farm	L806279	G807214	IT0003128367	1	63	63	-99	40	80	120	0	0	0	0	0	0	0	0	0	0	0	0
solar	Chile	Americas	Latin America and the Caribbean	Campos Del Sol Photovoltaic Solar Plant		Planta Solar Fotovoltaica Campos del Sol		393	operating	2023		PV						Enel Chile		-27.1561	-70.4979	approximate			Copiapó	Atacama	https://gem.wiki/Campos_Del_Sol_Photovoltaic_Solar_Plant	L807161	G808393	IT0003128367	1	393	393	1	2063	2103	2143	0	0	0	393	393	393	393	393	393	393	393	393
solar	Chile	Americas	Latin America and the Caribbean	Carrera Pinto solar farm		Planta Solar Carrera Pinto		97	operating	2016		PV						Enel Chile		-27.0045	-69.871	exact	Copiapó	Provincia de Copiapó	Copiapó	Atacama Region	https://gem.wiki/Carrera_Pinto_solar_farm	L807162	G808394	IT0003128367	1	97	97	8	2056	2096	2136	97	97	97	97	97	97	97	97	97	97	97	97
solar	Spain	Europe	Southern Europe	Castilblanco solar farm				42.9	operating	2019		PV						Enel Green Power		39.2857	-5.0957	approximate			Badajoz	Extremadura	https://gem.wiki/Castilblanco_solar_farm	L824438	G827576	IT0003128367	1	42.9	42.9	5	2059	2099	2139	42.9	42.9	42.9	42.9	42.9	42.9	42.9	42.9	42.9	42.9	42.9	42.9
solar	Greece	Europe	Southern Europe	Chamolio solar farm		Χαμωλιο		4.8	operating			PV						Enel Green Power Greece SA		37.9608	21.348	exact		Elis Regional Unit	Western Greece	Peloponnese, Western Greece and the Ionian	https://gem.wiki/Chamolio_solar_farm	L822340	G825392	IT0003128367	1	4.8	4.8	-99	40	80	120	4.8	4.8	4.8	4.8	4.8	4.8	4.8	4.8	4.8	4.8	4.8	4.8
solar	Chile	Americas	Latin America and the Caribbean	Chañares Solar Plant		Planta Solar Chañares		40	operating	2014		PV						Enel Chile		-26.375	-70.0801	exact				Atacama	https://gem.wiki/Chañares_Solar_Plant	L807163	G808395	IT0003128367	1	40	40	10	2054	2094	2134	40	40	40	40	40	40	40	40	40	40	40	40
solar	Panama	Americas	Latin America and the Caribbean	Chiriquí solar farm		Parque Solar Chiriquí		9	operating	2015		PV						Enel Green Power SPA		8.2702	-82.0022	approximate		Distrito San Lorenzo		Chiriquí	https://gem.wiki/Chiriquí_solar_farm	L807741	G809432	IT0003128367	1	9	9	9	2055	2095	2135	9	9	9	9	9	9	9	9	9	9	9	9
solar	Greece	Europe	Southern Europe	Choirodasos solar farm		Χοιροδασος		4	operating			PV						Enel Green Power Greece SA		41.0065	24.9326	exact		Xanthi Regional Unit	Eastern Macedonia and Thrace	Macedonia and Thrace	https://gem.wiki/Choirodasos_solar_farm	L822347	G825399	IT0003128367	1	4	4	-99	40	80	120	4	4	4	4	4	4	4	4	4	4	4	4
solar	Peru	Americas	Latin America and the Caribbean	Clemesí Solar Plant		Central Solar Clemesí		116	construction	2023		PV						Enel Green Power SPA		-17.1981	-70.9368	approximate			Mariscal Nieto	Moquegua	https://gem.wiki/Clemesí_Solar_Plant	L807177	G808413	IT0003128367	1	116	116	1	2063	2103	2143	0	0	0	116	116	116	116	116	116	116	116	116
solar	Australia	Oceania	Australia and New Zealand	Cohuna solar farm				34	operating	2022		PV						Enel Green Power SPA		-35.8832	144.237	exact				Victoria	https://gem.wiki/Cohuna_solar_farm	L805541	G806380	IT0003128367	1	34	34	2	2062	2102	2142	0	0	34	34	34	34	34	34	34	34	34	34
solar	Brazil	Americas	Latin America and the Caribbean	Cumaru solar farm	1	Usina Solar Cumaru		21.5	pre-construction			PV						Enel Green Power SPA		-5.1283	-35.8346	exact			Região Geográfica Intermediária de Natal	Rio Grande do Norte	https://gem.wiki/Cumaru_solar_farm	L831705	G836078	IT0003128367	1	64.5		-99	40	80	120	0	0	0	0	0	0	0	0	0	0	0	0
solar	Brazil	Americas	Latin America and the Caribbean	Cumaru solar farm	2	Usina Solar Cumaru		43	pre-construction			PV						Enel Green Power SPA		-5.1297	-35.8279	exact			Região Geográfica Intermediária de Natal	Rio Grande do Norte	https://gem.wiki/Cumaru_solar_farm	L831705	G836079	IT0003128367	1	64.5	64.5	-99	40	80	120	0	0	0	0	0	0	0	0	0	0	0	0
solar	Greece	Europe	Southern Europe	Daouslar (Enel Green Power) solar farm		Νταουσλαρ		2	operating			PV						Enel Green Power Greece SA		39.7926	22.422	exact		Larisa Regional Unit	Thessaly	Thessaly and Central Greece	https://gem.wiki/Daouslar_(Enel_Green_Power)_solar_farm	L822356	G825408	IT0003128367	1	2	2	-99	40	80	120	2	2	2	2	2	2	2	2	2	2	2	2
solar	Chile	Americas	Latin America and the Caribbean	Diego De Almagro Photovoltaic Solar Plant		Planta Solar Fotovoltaica Diego de Almagro		36	operating	2014		PV						Enel Chile		-26.3711	-70.0779	exact		Provincia de Chañaral		Atacama Region	https://gem.wiki/Diego_De_Almagro_Photovoltaic_Solar_Plant	L807164	G808396	IT0003128367	1	36	36	10	2054	2094	2134	36	36	36	36	36	36	36	36	36	36	36	36
solar	Chile	Americas	Latin America and the Caribbean	Domeyko Solar Park	1	Parque Solar Domeyko		135	operating	2023		PV						Enel Chile		-33.4665	-70.673	approximate				Antofagasta	https://gem.wiki/Domeyko_Solar_Park	L807165	G808397	IT0003128367	1	205		1	2063	2103	2143	0	0	0	135	135	135	135	135	135	135	135	135
solar	Chile	Americas	Latin America and the Caribbean	Domeyko Solar Park	Extension	Parque Solar Domeyko		70	operating	2023		PV						Enel Chile		-33.4665	-70.673	approximate	Santiago	Provincia de Santiago		Santiago Metropolitan Region	https://gem.wiki/Domeyko_Solar_Park	L807165	G810078	IT0003128367	1	205	205	1	2063	2103	2143	0	0	0	70	70	70	70	70	70	70	70	70
solar	Chile	Americas	Latin America and the Caribbean	Don Humberto Solar Park		Parque Solar Don Humberto		79	construction	2024		PV						Enel Chile		-33.4361	-70.6096	approximate				Metropolitana	https://gem.wiki/Don_Humberto_Solar_Park	L807117	G808267	IT0003128367	1	79	79	0	2064	2104	2144	0	0	0	0	79	79	79	79	79	79	79	79
solar	Spain	Europe	Southern Europe	Dulcinea solar farm				95.2	construction	2023		PV						Enel Green Power		37.5041	-5.7135	approximate			Sevilla	Andalusia	https://gem.wiki/Dulcinea_solar_farm	L824493	G827647	IT0003128367	1	95.2	95.2	1	2063	2103	2143	0	0	0	95.2	95.2	95.2	95.2	95.2	95.2	95.2	95.2	95.2
solar	Greece	Europe	Southern Europe	Ekta Domokou solar farm		Εκτα		2	operating			PV						Enel Green Power Greece SA		39.0834	22.3317	exact	Δημοτική Ενότητα Δομοκού	Phthiotis Regional Unit	Central Greece	Thessaly and Central Greece	https://gem.wiki/Ekta_Domokou_solar_farm	L822381	G825434	IT0003128367	1	2	2	-99	40	80	120	2	2	2	2	2	2	2	2	2	2	2	2
solar	Chile	Americas	Latin America and the Caribbean	El Manzano solar farm		Parque Solar El Manzano		101	construction			PV						Enel Chile		-33.2224	-70.5591	approximate	Colina	Provincia de Chacabuco		Santiago Metropolitan Region	https://gem.wiki/El_Manzano_solar_farm	L807982	G810080	IT0003128367	1	101	101	-99	40	80	120	0	0	0	0	0	0	0	101	101	101	101	101
solar	Colombia	Americas	Latin America and the Caribbean	El Paso PV Solar Park		Planta Solar El Paso		86	operating	2023		PV						Enel Green Power SPA		9.7815	-73.7201	exact		El Paso	El Paso	Cesar	https://gem.wiki/El_Paso_PV_Solar_Park	L807172	G808406	IT0003128367	1	86	86	1	2063	2103	2143	0	0	0	86	86	86	86	86	86	86	86	86
solar	Spain	Europe	Southern Europe	Encina al Sol solar farm				35.8	construction			PV						Enel Green Power		38.6648	-4.1406	approximate		Campo de Calatrava	Ciudad Real	Castile-La Mancha	https://gem.wiki/Encina_al_Sol_solar_farm	L824522	G827684	IT0003128367	1	35.8	35.8	-99	40	80	120	0	0	0	0	0	0	0	35.8	35.8	35.8	35.8	35.8
solar	Spain	Europe	Southern Europe	Esparragal solar farm	1		Guillena	50	operating	2022		PV						Enel Green Power España		37.5499	-6.0947	exact			Sevilla	Andalusia	https://gem.wiki/Esparragal_solar_farm	L824534	G827700	IT0003128367	1	50	50	2	2062	2102	2142	0	0	50	50	50	50	50	50	50	50	50	50
solar	Panama	Americas	Latin America and the Caribbean	Esperanza solar farm (Panama)		Parque Solar Esperanza	Esperanza Chiriqui, Bajo Frio 2	26	operating	2021		PV						Enel Green Power SPA		8.4201	-82.8077	exact		Progreso	Barú	Chiriquí	https://gem.wiki/Esperanza_solar_farm_(Panama)	L807175	G808411	IT0003128367	1	26	26	3	2061	2101	2141	0	26	26	26	26	26	26	26	26	26	26	26
solar	Panama	Americas	Latin America and the Caribbean	Estrella solar farm		Parque Solar Estrella		8	operating	2018		PV						Enel Green Power SPA		8.2511	-81.988	exact		Distrito San Lorenzo		Chiriquí	https://gem.wiki/Estrella_solar_farm	L807753	G809448	IT0003128367	1	8	8	6	2058	2098	2138	8	8	8	8	8	8	8	8	8	8	8	8
solar	Spain	Europe	Southern Europe	Estrella Solar PV solar farm				35.8	construction			PV						Enel Green Power		38.6648	-4.1406	approximate		Campo de Calatrava	Ciudad Real	Castile-La Mancha	https://gem.wiki/Estrella_Solar_PV_solar_farm	L824537	G827703	IT0003128367	1	35.8	35.8	-99	40	80	120	0	0	0	0	0	0	0	35.8	35.8	35.8	35.8	35.8
solar	Spain	Europe	Southern Europe	Eugenia solar farm (Spain)				38.2	construction			PV						Enel Green Power		41.8418	-2.0457	approximate			Soria	Castile and León	https://gem.wiki/Eugenia_solar_farm_(Spain)	L824538	G827704	IT0003128367	1	38.2	38.2	-99	40	80	120	0	0	0	0	0	0	0	38.2	38.2	38.2	38.2	38.2
solar	Chile	Americas	Latin America and the Caribbean	Finis Terrae Photovoltaic Solar Plant	1	Planta Solar Fotovoltaico Finis Terrae	ex Crucero Oeste	160	operating	2016		PV						Enel Chile		-22.342	-69.522	exact		Maria Elena		Antofagasta	https://gem.wiki/Finis_Terrae_Photovoltaic_Solar_Plant	L807166	G808398	IT0003128367	1	286		8	2056	2096	2136	160	160	160	160	160	160	160	160	160	160	160	160
solar	Chile	Americas	Latin America and the Caribbean	Finis Terrae Photovoltaic Solar Plant	2	Planta Solar Fotovoltaico Finis Terrae		126	operating	2022		PV						Enel Chile		-22.342	-69.522	approximate		Maria Elena		Antofagasta	https://gem.wiki/Finis_Terrae_Photovoltaic_Solar_Plant	L807166	G808399	IT0003128367	1	286	286	2	2062	2102	2142	0	0	126	126	126	126	126	126	126	126	126	126
solar	Brazil	Americas	Latin America and the Caribbean	Fontes Solar Plant	1	Usina Fontes Solar		5	operating			PV						Enel Green Power SPA		-9.0701	-38.1499	approximate			Região Geográfica Intermediária de Serra Talhada	Pernambuco	https://gem.wiki/Fontes_Solar_Plant	L807893	G809770	IT0003128367	1	10		-99	40	80	120	5	5	5	5	5	5	5	5	5	5	5	5
solar	Brazil	Americas	Latin America and the Caribbean	Fontes Solar Plant	2	Usina Fontes Solar		5	operating			PV						Enel Green Power SPA		-9.0701	-38.1499	approximate			Região Geográfica Intermediária de Serra Talhada	Pernambuco	https://gem.wiki/Fontes_Solar_Plant	L807893	G809771	IT0003128367	1	10	10	-99	40	80	120	5	5	5	5	5	5	5	5	5	5	5	5
solar	Greece	Europe	Southern Europe	Gephyria solar farm	1, 2	Γεφυρια Ι		3.5	operating			PV						Enel Green Power Greece SA		39.2971	22.1801	exact	Δημοτική Ενότητα Σοφάδων	Karditsa Regional Unit	Thessaly	Thessaly and Central Greece	https://gem.wiki/Gephyria_solar_farm	L822401	G825455	IT0003128367	1	3.5	3.5	-99	40	80	120	3.5	3.5	3.5	3.5	3.5	3.5	3.5	3.5	3.5	3.5	3.5	3.5
solar	Greece	Europe	Southern Europe	Giatsovo solar farm		Γιατσοβο		1.5	operating			PV						Enel Green Power Greece SA		40.8343	21.4617	exact		Florina Regional Unit	Western Macedonia	Epirus and Western Macedonia	https://gem.wiki/Giatsovo_solar_farm	L822404	G825458	IT0003128367	1	1.5	1.5	-99	40	80	120	1.5	1.5	1.5	1.5	1.5	1.5	1.5	1.5	1.5	1.5	1.5	1.5
solar	Colombia	Americas	Latin America and the Caribbean	Guayepo PV Solar Park	1 & 2	Parque Solar Fotovoltaico Guayepo		487	construction	2024		PV						Enel Green Power SPA		10.6054	-74.7826	approximate			Ponedera	Atlantico	https://gem.wiki/Guayepo_PV_Solar_Park	L807173	G808407	IT0003128367	1	487	487	0	2064	2104	2144	0	0	0	0	487	487	487	487	487	487	487	487
solar	Brazil	Americas	Latin America and the Caribbean	Horizonte Solar Park	1	Parque Solar Horizonte		29	operating	2018		PV						Enel Green Power SPA		-12.609	-44.0852	exact	Tabocas do Brejo Velho		Região Geográfica Intermediária de Barreiras	Bahia	https://gem.wiki/Horizonte_Solar_Park	L807154	G808354	IT0003128367	1	78		6	2058	2098	2138	29	29	29	29	29	29	29	29	29	29	29	29
solar	Brazil	Americas	Latin America and the Caribbean	Horizonte Solar Park	11	Parque Solar Horizonte		20	operating	2018		PV						Enel Green Power SPA		-12.6394	-44.0848	exact	Tabocas do Brejo Velho		Região Geográfica Intermediária de Barreiras	Bahia	https://gem.wiki/Horizonte_Solar_Park	L807154	G808355	IT0003128367	1	78		6	2058	2098	2138	20	20	20	20	20	20	20	20	20	20	20	20
solar	Brazil	Americas	Latin America and the Caribbean	Horizonte Solar Park	2	Parque Solar Horizonte		29	operating	2018		PV						Enel Green Power SPA		-12.6141	-44.0896	exact	Tabocas do Brejo Velho		Região Geográfica Intermediária de Barreiras	Bahia	https://gem.wiki/Horizonte_Solar_Park	L807154	G808356	IT0003128367	1	78	78	6	2058	2098	2138	29	29	29	29	29	29	29	29	29	29	29	29
solar	Greece	Europe	Southern Europe	Iasmos solar farm		Ιασμος		2.7	operating			PV						Enel Green Power Greece SA		41.1159	25.0949	exact		Rodopi Regional Unit	Eastern Macedonia and Thrace	Macedonia and Thrace	https://gem.wiki/Iasmos_solar_farm	L822418	G825472	IT0003128367	1	2.7	2.7	-99	40	80	120	2.7	2.7	2.7	2.7	2.7	2.7	2.7	2.7	2.7	2.7	2.7	2.7
solar	Spain	Europe	Southern Europe	Iberelectrica 1 solar farm			Cluster Calatrava	22.3	operating	2022		PV						Enel Green Power		38.9935	-3.3951	approximate		La Mancha	Ciudad Real	Castile-La Mancha	https://gem.wiki/Iberelectrica_1_solar_farm	L824608	G827802	IT0003128367	1	22.3	22.3	2	2062	2102	2142	0	0	22.3	22.3	22.3	22.3	22.3	22.3	22.3	22.3	22.3	22.3
solar	Peru	Americas	Latin America and the Caribbean	Illari solar farm	Norte	Central Solar Illari		112.2	construction	2023		PV						Enel Green Power SPA		-16.4353	-71.836	approximate				Arequipa	https://gem.wiki/Illari_solar_farm	L808298	G838205	IT0003128367	1	423.8		1	2063	2103	2143	0	0	0	112.2	112.2	112.2	112.2	112.2	112.2	112.2	112.2	112.2
solar	Peru	Americas	Latin America and the Caribbean	Illari solar farm	Sur	Central Solar Illari		311.6	pre-construction	2024		PV						Enel Green Power SPA		-16.4027	-71.5344	approximate				Arequipa	https://gem.wiki/Illari_solar_farm	L808298	G810470	IT0003128367	1	423.8	423.8	0	2064	2104	2144	0	0	0	0	0	0	0	0	0	0	0	0
solar	Brazil	Americas	Latin America and the Caribbean	Ituverava Solar Plant	1	Parque Solar Ituverava		28	operating	2017		PV						Enel Green Power SPA		-12.5873	-44.1069	exact	Tabocas do Brejo Velho		Região Geográfica Intermediária de Barreiras	Bahia	https://gem.wiki/Ituverava_Solar_Plant	L807155	G808357	IT0003128367	1	196		7	2057	2097	2137	28	28	28	28	28	28	28	28	28	28	28	28
solar	Brazil	Americas	Latin America and the Caribbean	Ituverava Solar Plant	2	Parque Solar Ituverava		28	operating	2017		PV						Enel Green Power SPA		-12.5926	-44.1046	exact	Tabocas do Brejo Velho		Região Geográfica Intermediária de Barreiras	Bahia	https://gem.wiki/Ituverava_Solar_Plant	L807155	G808358	IT0003128367	1	196		7	2057	2097	2137	28	28	28	28	28	28	28	28	28	28	28	28
solar	Brazil	Americas	Latin America and the Caribbean	Ituverava Solar Plant	3	Parque Solar Ituverava		28	operating	2017		PV						Enel Green Power SPA		-12.5934	-44.0995	exact	Tabocas do Brejo Velho		Região Geográfica Intermediária de Barreiras	Bahia	https://gem.wiki/Ituverava_Solar_Plant	L807155	G808359	IT0003128367	1	196		7	2057	2097	2137	28	28	28	28	28	28	28	28	28	28	28	28
solar	Brazil	Americas	Latin America and the Caribbean	Ituverava Solar Plant	4	Parque Solar Ituverava		28	operating	2017		PV						Enel Green Power SPA		-12.599	-44.1038	exact	Tabocas do Brejo Velho		Região Geográfica Intermediária de Barreiras	Bahia	https://gem.wiki/Ituverava_Solar_Plant	L807155	G808360	IT0003128367	1	196		7	2057	2097	2137	28	28	28	28	28	28	28	28	28	28	28	28
solar	Brazil	Americas	Latin America and the Caribbean	Ituverava Solar Plant	5	Parque Solar Ituverava		28	operating	2017		PV						Enel Green Power SPA		-12.6015	-44.1041	exact	Tabocas do Brejo Velho		Região Geográfica Intermediária de Barreiras	Bahia	https://gem.wiki/Ituverava_Solar_Plant	L807155	G808361	IT0003128367	1	196		7	2057	2097	2137	28	28	28	28	28	28	28	28	28	28	28	28
solar	Brazil	Americas	Latin America and the Caribbean	Ituverava Solar Plant	6	Parque Solar Ituverava		28	operating	2017		PV						Enel Green Power SPA		-12.6035	-44.0933	exact	Tabocas do Brejo Velho		Região Geográfica Intermediária de Barreiras	Bahia	https://gem.wiki/Ituverava_Solar_Plant	L807155	G808362	IT0003128367	1	196		7	2057	2097	2137	28	28	28	28	28	28	28	28	28	28	28	28
solar	Brazil	Americas	Latin America and the Caribbean	Ituverava Solar Plant	7	Parque Solar Ituverava		28	operating	2017		PV						Enel Green Power SPA		-12.6042	-44.1158	exact	Tabocas do Brejo Velho		Região Geográfica Intermediária de Barreiras	Bahia	https://gem.wiki/Ituverava_Solar_Plant	L807155	G808363	IT0003128367	1	196	196	7	2057	2097	2137	28	28	28	28	28	28	28	28	28	28	28	28
solar	Panama	Americas	Latin America and the Caribbean	Jagüito solar farm		Parque Solar Jagüito		13.1	operating	2021		PV						Enel Green Power SPA		8.172	-80.6708	exact		Distrito Aguadulce		Coclé	https://gem.wiki/Jagüito_solar_farm	L807758	G809456	IT0003128367	1	13.1	13.1	3	2061	2101	2141	0	13.1	13.1	13.1	13.1	13.1	13.1	13.1	13.1	13.1	13.1	13.1
solar	Greece	Europe	Southern Europe	Kallidromo solar farm		Καλλιδρομο		188	pre-construction			PV						Enel Green Power Greece SA		38.7377	22.6396	exact	Municipal Unit of Molos	Phthiotis Regional Unit	Central Greece	Thessaly and Central Greece	https://gem.wiki/Kallidromo_solar_farm	L822431	G825485	IT0003128367	1	188	188	-99	40	80	120	0	0	0	0	0	0	0	0	0	0	0	0
solar	Greece	Europe	Southern Europe	Kaminia - Kolovoutselo solar farm		Καμινια - Κολοβουτσελο		2	operating			PV						Enel Green Power Greece SA		39.7595	20.6768	exact		Ioannina Regional Unit	Epirus	Epirus and Western Macedonia	https://gem.wiki/Kaminia_-_Kolovoutselo_solar_farm	L822437	G825492	IT0003128367	1	2	2	-99	40	80	120	2	2	2	2	2	2	2	2	2	2	2	2
solar	Greece	Europe	Southern Europe	Karydia solar farm		Καρυδια		3.1	operating			PV						Enel Green Power Greece SA		41.0204	24.967	exact		Xanthi Regional Unit	Eastern Macedonia and Thrace	Macedonia and Thrace	https://gem.wiki/Karydia_solar_farm	L822445	G825500	IT0003128367	1	3.1	3.1	-99	40	80	120	3.1	3.1	3.1	3.1	3.1	3.1	3.1	3.1	3.1	3.1	3.1	3.1
solar	Greece	Europe	Southern Europe	Kourtesi I solar farm		Κουρτεσι Ι		4.9	operating			PV						Enel Green Power Greece SA		37.9617	21.3441	exact		Elis Regional Unit	Western Greece	Peloponnese, Western Greece and the Ionian	https://gem.wiki/Kourtesi_I_solar_farm	L822487	G825543	IT0003128367	1	4.9	4.9	-99	40	80	120	4.9	4.9	4.9	4.9	4.9	4.9	4.9	4.9	4.9	4.9	4.9	4.9
solar	Greece	Europe	Southern Europe	Kryoneri (Enel Green Power) solar farm		Κρυονερι		3.6	operating			PV						Enel Green Power Greece SA		40.3395	21.3083	exact		Kozani Regional Unit	Western Macedonia	Epirus and Western Macedonia	https://gem.wiki/Kryoneri_(Enel_Green_Power)_solar_farm	L822497	G825554	IT0003128367	1	3.6	3.6	-99	40	80	120	3.6	3.6	3.6	3.6	3.6	3.6	3.6	3.6	3.6	3.6	3.6	3.6
solar	Chile	Americas	Latin America and the Caribbean	La Colonia solar farm		Parque Solar La Colonia		10.8	operating			PV						Enel Chile		-33.7328	-70.7425	approximate		Provincia de Maipo		Santiago Metropolitan Region	https://gem.wiki/La_Colonia_solar_farm	L832159	G837699	IT0003128367	1	10.8	10.8	-99	40	80	120	10.8	10.8	10.8	10.8	10.8	10.8	10.8	10.8	10.8	10.8	10.8	10.8
solar	Colombia	Americas	Latin America and the Caribbean	La Loma Solar Park		Parque Solar La Loma	La Loma Cesar	150	operating	2023		PV						Enel Green Power SPA		9.7063	-73.5222	approximate			La Loma	Cesar	https://gem.wiki/La_Loma_Solar_Park	L807174	G808408	IT0003128367	1	150	150	1	2063	2103	2143	0	0	0	150	150	150	150	150	150	150	150	150
solar	Mexico	Americas	Latin America and the Caribbean	La Magdalena solar farm	1	Parque Solar La Magdalena		220	operating	2019		PV						Enel Green Power SPA		19.1791	-98.1948	approximate				Tlaxcala	https://gem.wiki/La_Magdalena_solar_farm	L807150	G809323	IT0003128367	1	440		5	2059	2099	2139	220	220	220	220	220	220	220	220	220	220	220	220
solar	Mexico	Americas	Latin America and the Caribbean	La Magdalena solar farm	2	Parque Solar La Magdalena II		220	operating	2019		PV						Enel Green Power SPA		19.5521	-98.3534	exact		Benito Juárez		Tlaxcala	https://gem.wiki/La_Magdalena_solar_farm	L807150	G808345	IT0003128367	1	440	440	5	2059	2099	2139	220	220	220	220	220	220	220	220	220	220	220	220
solar	Spain	Europe	Southern Europe	La Revuelta solar farm				125.9	pre-construction			PV						Enel Green Power España		39.0011	-3.3712	approximate		La Mancha	Ciudad Real	Castile-La Mancha	https://gem.wiki/La_Revuelta_solar_farm	L824651	G827848	IT0003128367	1	125.9	125.9	-99	40	80	120	0	0	0	0	0	0	0	0	0	0	0	0
solar	Chile	Americas	Latin America and the Caribbean	Lalackama Solar Complex	1	Complejo Solar Lalackama		60	operating	2014		PV						Enel Chile		-25.1072	-70.3131	exact		Provincia de Antofagasta		Antofagasta Region	https://gem.wiki/Lalackama_Solar_Complex	L807167	G808400	IT0003128367	1	241		10	2054	2094	2134	60	60	60	60	60	60	60	60	60	60	60	60
solar	Chile	Americas	Latin America and the Caribbean	Lalackama Solar Complex	3	Complejo Solar Lalackama		181	construction	2023		PV						Enel Chile		-25.1072	-70.3131	approximate			Taltal	Antofagasta	https://gem.wiki/Lalackama_Solar_Complex	L807167	G808401	IT0003128367	1	241	241	1	2063	2103	2143	0	0	0	181	181	181	181	181	181	181	181	181
solar	Brazil	Americas	Latin America and the Caribbean	Lapa Solar Park	2	Parque Solar São Gonçalo	BJL Solar Park, BJL ENEL	39	operating	2017		PV						Enel Green Power Brasil Participações LTDA		-13.3187	-43.3593	exact	Bom Jesus da Lapa		Região Geográfica Intermediária de Guanambi	Bahia	https://gem.wiki/Lapa_Solar_Park	L807156	G808409	IT0003128367	1	158		7	2057	2097	2137	39	39	39	39	39	39	39	39	39	39	39	39
solar	Brazil	Americas	Latin America and the Caribbean	Lapa Solar Park	3	Parque Solar São Gonçalo	BJL Solar Park, BJL ENEL	39	operating	2017		PV						Enel Green Power Brasil Participações LTDA		-13.3201	-43.3682	exact	Bom Jesus da Lapa		Região Geográfica Intermediária de Guanambi	Bahia	https://gem.wiki/Lapa_Solar_Park	L807156	G808410	IT0003128367	1	158		7	2057	2097	2137	39	39	39	39	39	39	39	39	39	39	39	39
solar	Brazil	Americas	Latin America and the Caribbean	Lapa Solar Park	Bom Jesus da Lapa 1	Parque Solar Lapa	BJL Solar Park, BJL ENEL	40	operating	2017		PV						Enel Green Power SPA		-13.3002	-43.3235	exact	Bom Jesus da Lapa		Região Geográfica Intermediária de Guanambi	Bahia	https://gem.wiki/Lapa_Solar_Park	L807156	G808364	IT0003128367	1	158		7	2057	2097	2137	40	40	40	40	40	40	40	40	40	40	40	40
solar	Brazil	Americas	Latin America and the Caribbean	Lapa Solar Park	Bom Jesus da Lapa 2	Parque Solar Lapa	BJL Solar Park, BJL ENEL	40	operating	2017		PV						Enel Green Power SPA		-13.2978	-43.3241	exact	Bom Jesus da Lapa		Região Geográfica Intermediária de Guanambi	Bahia	https://gem.wiki/Lapa_Solar_Park	L807156	G808365	IT0003128367	1	158	158	7	2057	2097	2137	40	40	40	40	40	40	40	40	40	40	40	40
solar	United States	Americas	Northern America	Lily Solar Hybrid			Lily Kaufman	147	operating	2021		PV						Enel Green Power SPA		32.5333	-96.429	exact	Scurry	Kaufman County		Texas	https://gem.wiki/Lily_Solar_Hybrid	L804451	G805116	IT0003128367	1	147	147	3	2061	2101	2141	0	147	147	147	147	147	147	147	147	147	147	147
solar	Greece	Europe	Southern Europe	Limnochori solar farm		Λιμνοχωρι, Δ.Δ. Σαγαιϊκων		4.8	operating			PV						Enel Green Power Greece SA		38.1307	21.4527	exact	Municipal Unit of Movri	Achaea Regional Unit	Western Greece	Peloponnese, Western Greece and the Ionian	https://gem.wiki/Limnochori_solar_farm	L822514	G825571	IT0003128367	1	4.8	4.8	-99	40	80	120	4.8	4.8	4.8	4.8	4.8	4.8	4.8	4.8	4.8	4.8	4.8	4.8
solar	Chile	Americas	Latin America and the Caribbean	Los Manolos solar farm		Declaración de Impacto Ambiental Proyecto Fotovoltaico Los Manolos		79.5	pre-construction			PV						Enel Chile		-18.6178	-69.6062	approximate	Arica	Provincia de Arica		Arica and Parinacota Region	https://gem.wiki/Los_Manolos_solar_farm	L832187	G837728	IT0003128367	1	79.5	79.5	-99	40	80	120	0	0	0	0	0	0	0	0	0	0	0	0
solar	Panama	Americas	Latin America and the Caribbean	Madre Vieja PV Solar Plant		Planta Solar Madre Vieja	Bajo Frio 3	31	operating	2022		PV						Enel Green Power SPA		8.1166	-81.6237	approximate				Chiriquí	https://gem.wiki/Madre_Vieja_PV_Solar_Plant	L807176	G808412	IT0003128367	1	31	31	2	2062	2102	2142	0	0	31	31	31	31	31	31	31	31	31	31
solar	Mexico	Americas	Latin America and the Caribbean	Magdalena solar farm	1	Planta Solar Magdalena I		500	pre-construction			PV						Enel Green Power		19.5889	-98.1134	approximate				Tlaxcala	https://gem.wiki/Magdalena_solar_farm	L808359	G838114	IT0003128367	1	646		-99	40	80	120	0	0	0	0	0	0	0	0	0	0	0	0
solar	Mexico	Americas	Latin America and the Caribbean	Magdalena solar farm	2.2	Planta Solar Magdalena II Fase II		146	pre-construction			PV						Enel Green Power		19.5889	-98.1134	approximate				Tlaxcala	https://gem.wiki/Magdalena_solar_farm	L808359	G838115	IT0003128367	1	646	646	-99	40	80	120	0	0	0	0	0	0	0	0	0	0	0	0
solar	Italy	Europe	Southern Europe	Malvezzi solar farm				17	construction			PV						Enel SPA		44.7662	11.5022	approximate		Ferrara		Emilia-Romagna	https://gem.wiki/Malvezzi_solar_farm	L823339	G826405	IT0003128367	1	17	17	-99	40	80	120	0	0	0	0	0	0	0	17	17	17	17	17
solar	Ethiopia	Africa	Sub-Saharan Africa	Metehara solar farm			Metehara Solar Pv	100	shelved			PV						Enel Green Power SPA [80%]; Orchid Business Group [20%]		8.8884	40.0138	approximate	Metehara			Oromia	https://gem.wiki/Metehara_solar_farm	L800212	G800257	IT0003128367	0.8	100	100	-99	40	80	120	0	0	0	0	0	0	0	0	0	0	0	0
solar	Greece	Europe	Southern Europe	Mikre Yodzalaka Kai Petromadria solar farm		Μικρή Γοντζαλάκα Και Πετρομάντρια		35	announced			PV						Enel Green Power Greece SA		39.2632	22.5874	exact		Larisa Regional Unit	Thessaly	Thessaly and Central Greece	https://gem.wiki/Mikre_Yodzalaka_Kai_Petromadria_solar_farm	L806282	G807217	IT0003128367	1	35	35	-99	40	80	120	0	0	0	0	0	0	0	0	0	0	0	0
solar	Greece	Europe	Southern Europe	Mikre Yodzalaka solar farm		Μικρη Γοντζαλακα		75.2	pre-construction			PV						Enel Green Power Greece SA		39.2705	22.5978	exact		Larisa Regional Unit	Thessaly	Thessaly and Central Greece	https://gem.wiki/Mikre_Yodzalaka_solar_farm	L806283	G807218	IT0003128367	1	75.2	75.2	-99	40	80	120	0	0	0	0	0	0	0	0	0	0	0	0
solar	Spain	Europe	Southern Europe	Minglanilla solar farm	1			99.6	operating	2022		PV						Enel Green Power España		39.5331	-1.5974	approximate			Cuenca	Castile-La Mancha	https://gem.wiki/Minglanilla_solar_farm	L824728	G827932	IT0003128367	1	199.2		2	2062	2102	2142	0	0	99.6	99.6	99.6	99.6	99.6	99.6	99.6	99.6	99.6	99.6
solar	Spain	Europe	Southern Europe	Minglanilla solar farm	2			99.6	operating	2022		PV						Enel Green Power España		39.5331	-1.5974	approximate			Cuenca	Castile-La Mancha	https://gem.wiki/Minglanilla_solar_farm	L824728	G827933	IT0003128367	1	199.2	199.2	2	2062	2102	2142	0	0	99.6	99.6	99.6	99.6	99.6	99.6	99.6	99.6	99.6	99.6
solar	Romania	Europe	Eastern Europe	Moșteni solar farm			Cef Monsteni	26	pre-construction			PV						Enel Green Power SPA		44.7084	25.8888	approximate	Moșteni	Teleorman County		Muntenia	https://gem.wiki/Moșteni_solar_farm	L806280	G807215	IT0003128367	1	26	26	-99	40	80	120	0	0	0	0	0	0	0	0	0	0	0	0
solar	Zambia	Africa	Sub-Saharan Africa	Ngonye solar farm			Ngonye Solar PV Plant, Ngonye Solar PV Facility	34	operating	2019		PV						Enel Green Power SPA [80%]; Industrial Development CORP (IDC) [20%]		-15.5169	28.4286	exact			Kafue District	Lusaka Province	https://gem.wiki/Ngonye_solar_farm	L800229	G800275	IT0003128367	0.8	34	34	5	2059	2099	2139	27.2	27.2	27.2	27.2	27.2	27.2	27.2	27.2	27.2	27.2	27.2	27.2
solar	Spain	Europe	Southern Europe	Ninobe 3 solar farm			Cluster Calatrava	22.3	operating	2022		PV						Enel Green Power		38.9935	-3.3951	approximate		La Mancha	Ciudad Real	Castile-La Mancha	https://gem.wiki/Ninobe_3_solar_farm	L824761	G827971	IT0003128367	1	22.3	22.3	2	2062	2102	2142	0	0	22.3	22.3	22.3	22.3	22.3	22.3	22.3	22.3	22.3	22.3
solar	Italy	Europe	Southern Europe	Nola Cis solar farm				25	operating			PV						Enel Green Power SPA		40.9622	14.4885	exact		Napoli		Campania	https://gem.wiki/Nola_Cis_solar_farm	L805789	G806663	IT0003128367	1	25	25	-99	40	80	120	25	25	25	25	25	25	25	25	25	25	25	25
solar	Brazil	Americas	Latin America and the Caribbean	Nova Olinda Solar Power Plant	10	Usina Fotovoltaica Nova Olinda		30	operating	2017		PV						Enel Green Power SPA		-8.1941	-42.5596	exact	Ribeira do Piauí		Região Geográfica Intermediária de São Raimundo Nonato	Piauí	https://gem.wiki/Nova_Olinda_Solar_Power_Plant	L807158	G808367	IT0003128367	1	210		7	2057	2097	2137	30	30	30	30	30	30	30	30	30	30	30	30
solar	Brazil	Americas	Latin America and the Caribbean	Nova Olinda Solar Power Plant	11	Usina Fotovoltaica Nova Olinda		30	operating	2017		PV						Enel Green Power SPA		-8.1898	-42.5643	exact	Ribeira do Piauí		Região Geográfica Intermediária de São Raimundo Nonato	Piauí	https://gem.wiki/Nova_Olinda_Solar_Power_Plant	L807158	G808368	IT0003128367	1	210		7	2057	2097	2137	30	30	30	30	30	30	30	30	30	30	30	30
solar	Brazil	Americas	Latin America and the Caribbean	Nova Olinda Solar Power Plant	12	Usina Fotovoltaica Nova Olinda		30	operating	2017		PV						Enel Green Power SPA		-8.1801	-42.5609	exact	Ribeira do Piauí		Região Geográfica Intermediária de São Raimundo Nonato	Piauí	https://gem.wiki/Nova_Olinda_Solar_Power_Plant	L807158	G808369	IT0003128367	1	210		7	2057	2097	2137	30	30	30	30	30	30	30	30	30	30	30	30
solar	Brazil	Americas	Latin America and the Caribbean	Nova Olinda Solar Power Plant	13	Usina Fotovoltaica Nova Olinda		30	operating	2017		PV						Enel Green Power SPA		-7.9272	-42.6127	exact	Ribeira do Piauí		Região Geográfica Intermediária de São Raimundo Nonato	Piauí	https://gem.wiki/Nova_Olinda_Solar_Power_Plant	L807158	G808370	IT0003128367	1	210		7	2057	2097	2137	30	30	30	30	30	30	30	30	30	30	30	30
solar	Brazil	Americas	Latin America and the Caribbean	Nova Olinda Solar Power Plant	14	Usina Fotovoltaica Nova Olinda		30	operating	2017		PV						Enel Green Power SPA		-8.1774	-42.5639	exact	Ribeira do Piauí		Região Geográfica Intermediária de São Raimundo Nonato	Piauí	https://gem.wiki/Nova_Olinda_Solar_Power_Plant	L807158	G808371	IT0003128367	1	210		7	2057	2097	2137	30	30	30	30	30	30	30	30	30	30	30	30
solar	Brazil	Americas	Latin America and the Caribbean	Nova Olinda Solar Power Plant	8	Usina Fotovoltaica Nova Olinda		30	operating	2017		PV						Enel Green Power SPA		-8.2096	-42.5394	exact	Ribeira do Piauí		Região Geográfica Intermediária de São Raimundo Nonato	Piauí	https://gem.wiki/Nova_Olinda_Solar_Power_Plant	L807158	G808372	IT0003128367	1	210		7	2057	2097	2137	30	30	30	30	30	30	30	30	30	30	30	30
solar	Brazil	Americas	Latin America and the Caribbean	Nova Olinda Solar Power Plant	9	Usina Fotovoltaica Nova Olinda		30	operating	2017		PV						Enel Green Power SPA		-8.2165	-42.5382	exact	Ribeira do Piauí		Região Geográfica Intermediária de São Raimundo Nonato	Piauí	https://gem.wiki/Nova_Olinda_Solar_Power_Plant	L807158	G808373	IT0003128367	1	210	210	7	2057	2097	2137	30	30	30	30	30	30	30	30	30	30	30	30
solar	Brazil	Americas	Latin America and the Caribbean	Novo Lapa MP solar farm	1	Parque Solar Novo Lapa MP		44	pre-construction			PV						Enel Green Power SPA		-13.2378	-43.3534	exact			Região Geográfica Intermediária de Guanambi	Bahia	https://gem.wiki/Novo_Lapa_MP_solar_farm	L807932	G809885	IT0003128367	1	330.6		-99	40	80	120	0	0	0	0	0	0	0	0	0	0	0	0
solar	Brazil	Americas	Latin America and the Caribbean	Novo Lapa MP solar farm	2	Parque Solar Novo Lapa MP		44	pre-construction			PV						Enel Green Power SPA		-13.2427	-43.3413	exact			Região Geográfica Intermediária de Guanambi	Bahia	https://gem.wiki/Novo_Lapa_MP_solar_farm	L807932	G809886	IT0003128367	1	330.6		-99	40	80	120	0	0	0	0	0	0	0	0	0	0	0	0
solar	Brazil	Americas	Latin America and the Caribbean	Novo Lapa MP solar farm	3	Parque Solar Novo Lapa MP		44	pre-construction			PV						Enel Green Power SPA		-13.2452	-43.3476	exact			Região Geográfica Intermediária de Guanambi	Bahia	https://gem.wiki/Novo_Lapa_MP_solar_farm	L807932	G809887	IT0003128367	1	330.6		-99	40	80	120	0	0	0	0	0	0	0	0	0	0	0	0
solar	Brazil	Americas	Latin America and the Caribbean	Novo Lapa MP solar farm	4	Parque Solar Novo Lapa MP		44	pre-construction			PV						Enel Green Power SPA		-13.2411	-43.3583	exact			Região Geográfica Intermediária de Guanambi	Bahia	https://gem.wiki/Novo_Lapa_MP_solar_farm	L807932	G809888	IT0003128367	1	330.6		-99	40	80	120	0	0	0	0	0	0	0	0	0	0	0	0
solar	Brazil	Americas	Latin America and the Caribbean	Novo Lapa MP solar farm	5	Parque Solar Novo Lapa MP		44	pre-construction			PV						Enel Green Power SPA		-13.2483	-43.3398	exact			Região Geográfica Intermediária de Guanambi	Bahia	https://gem.wiki/Novo_Lapa_MP_solar_farm	L807932	G809889	IT0003128367	1	330.6		-99	40	80	120	0	0	0	0	0	0	0	0	0	0	0	0
solar	Brazil	Americas	Latin America and the Caribbean	Novo Lapa MP solar farm	6	Parque Solar Novo Lapa MP		44	pre-construction			PV						Enel Green Power SPA		-13.2556	-43.3459	exact			Região Geográfica Intermediária de Guanambi	Bahia	https://gem.wiki/Novo_Lapa_MP_solar_farm	L807932	G809890	IT0003128367	1	330.6		-99	40	80	120	0	0	0	0	0	0	0	0	0	0	0	0
solar	Brazil	Americas	Latin America and the Caribbean	Novo Lapa MP solar farm	7	Parque Solar Novo Lapa MP		37	pre-construction			PV						Enel Green Power SPA		-13.2497	-43.3526	exact			Região Geográfica Intermediária de Guanambi	Bahia	https://gem.wiki/Novo_Lapa_MP_solar_farm	L807932	G809891	IT0003128367	1	330.6		-99	40	80	120	0	0	0	0	0	0	0	0	0	0	0	0
solar	Brazil	Americas	Latin America and the Caribbean	Novo Lapa MP solar farm	8	Usina Solar Novo Lapa MP		29.6	pre-construction			PV						Enel Green Power SPA		-13.2549	-43.3555	exact			Região Geográfica Intermediária de Guanambi	Bahia	https://gem.wiki/Novo_Lapa_MP_solar_farm	L807932	G836709	IT0003128367	1	330.6	330.6	-99	40	80	120	0	0	0	0	0	0	0	0	0	0	0	0
solar	South Africa	Africa	Sub-Saharan Africa	Paleisheuwel Solar Power Plant			Electra Capital Solar Farm	83	operating	2016		Assumed PV						Enel Green Power SPA		-32.4148	18.7379	exact	Cederberg Local Municipality	West Coast District Municipality		Western Cape	https://gem.wiki/Paleisheuwel_Solar_Power_Plant	L800261	G800313	IT0003128367	1	83	83	8	2056	2096	2136	83	83	83	83	83	83	83	83	83	83	83	83
solar	Chile	Americas	Latin America and the Caribbean	Pampa Norte PV Solar Plant		Planta Solar Pampa Norte		85.3	operating	2015		PV						Enel Chile		-25.511	-70.166	exact		Provincia de Antofagasta	Taltal	Antofagasta Region	https://gem.wiki/Pampa_Norte_PV_Solar_Plant	L807168	G808402	IT0003128367	1	85.3	85.3	9	2055	2095	2135	85.3	85.3	85.3	85.3	85.3	85.3	85.3	85.3	85.3	85.3	85.3	85.3
solar	Greece	Europe	Southern Europe	Perasma Mavrodendri solar farm		Περασμα - Μαυροδενδρι		15	construction			PV						Enel Green Power Greece SA		40.3599	21.7537	exact		Kozani Regional Unit	Western Macedonia	Epirus and Western Macedonia	https://gem.wiki/Perasma_Mavrodendri_solar_farm	L822600	G825657	IT0003128367	1	15	15	-99	40	80	120	0	0	0	0	0	0	0	15	15	15	15	15
solar	Greece	Europe	Southern Europe	Perasma solar farm		Πέρασμα		70	construction	2023		PV						Enel Green Power Greece SA		40.3743	21.7494	exact	Mavrodendri	Kozani Regional Unit	Western Macedonia	Epirus and Western Macedonia	https://gem.wiki/Perasma_solar_farm	L822601	G825658	IT0003128367	1	70	70	1	2063	2103	2143	0	0	0	70	70	70	70	70	70	70	70	70
solar	Greece	Europe	Southern Europe	Perthori Bogdani Oxy solar farm		Περθορι - Μπογδανι - Οξυ		2.8	operating			PV						Enel Green Power Greece SA		37.8606	22.9356	exact	Municipal Unit of Saronikos	Corinthia Regional Unit	Peloponnese Region	Peloponnese, Western Greece and the Ionian	https://gem.wiki/Perthori_Bogdani_Oxy_solar_farm	L822604	G825662	IT0003128367	1	2.8	2.8	-99	40	80	120	2.8	2.8	2.8	2.8	2.8	2.8	2.8	2.8	2.8	2.8	2.8	2.8
solar	Greece	Europe	Southern Europe	Pezouliotika solar farm		Πεζουλιωτικα		3.5	operating			PV						Enel Green Power Greece SA		41.0242	24.9434	exact		Xanthi Regional Unit	Eastern Macedonia and Thrace	Macedonia and Thrace	https://gem.wiki/Pezouliotika_solar_farm	L822611	G825669	IT0003128367	1	3.5	3.5	-99	40	80	120	3.5	3.5	3.5	3.5	3.5	3.5	3.5	3.5	3.5	3.5	3.5	3.5
solar	Greece	Europe	Southern Europe	Platanos solar farm		Δ.Δ. Πλατανος		50	pre-construction			PV						Enel Green Power Greece SA		39.2196	22.5447	exact		Larisa Regional Unit	Thessaly	Thessaly and Central Greece	https://gem.wiki/Platanos_solar_farm	L806284	G807219	IT0003128367	1	50	50	-99	40	80	120	0	0	0	0	0	0	0	0	0	0	0	0
solar	Chile	Americas	Latin America and the Caribbean	PMGD Cabimas solar farm		Parque Solar PMGD Cabimas		10	operating			PV						Enel Chile		-35.5183	-71.6933	approximate		Cabimas			https://gem.wiki/PMGD_Cabimas_solar_farm	L832238	G837784	IT0003128367	1	10	10	-99	40	80	120	10	10	10	10	10	10	10	10	10	10	10	10
solar	Chile	Americas	Latin America and the Caribbean	PMGD Coinco solar farm		Parque Solar PMGD Coinco		3	construction			PV						Enel Chile		-34.2653	-70.9475	approximate		Coinco			https://gem.wiki/PMGD_Coinco_solar_farm	L832239	G837785	IT0003128367	1	3	3	-99	40	80	120	0	0	0	0	0	0	0	3	3	3	3	3
solar	Chile	Americas	Latin America and the Caribbean	PMGD Don Rodrigo solar farm		Parque Solar PMGD Don Rodrigo		5.4	operating			PV						Enel Chile		-34.1786	-70.7104	approximate		Don Rodrigo			https://gem.wiki/PMGD_Don_Rodrigo_solar_farm	L832240	G837786	IT0003128367	1	5.4	5.4	-99	40	80	120	5.4	5.4	5.4	5.4	5.4	5.4	5.4	5.4	5.4	5.4	5.4	5.4
solar	Chile	Americas	Latin America and the Caribbean	PMGD El Sharon solar farm		Parque Solar PMGD El Sharon		3	construction			PV						Enel Chile		-35.5183	-71.6933	approximate		El Sharon			https://gem.wiki/PMGD_El_Sharon_solar_farm	L832241	G837787	IT0003128367	1	3	3	-99	40	80	120	0	0	0	0	0	0	0	3	3	3	3	3
solar	Chile	Americas	Latin America and the Caribbean	PMGD La Colonia solar farm		Parque Solar PMGD La Colonia		10.5	operating	2023		PV						Enel Chile		-35.5183	-71.6933	approximate		La Colonia			https://gem.wiki/PMGD_La_Colonia_solar_farm	L832242	G837788	IT0003128367	1	10.5	10.5	1	2063	2103	2143	0	0	0	10.5	10.5	10.5	10.5	10.5	10.5	10.5	10.5	10.5
solar	Chile	Americas	Latin America and the Caribbean	PMGD Patagua solar farm		Parque Solar PMGD Patagua		10	operating			PV						Enel Chile		-35.6802	-71.3864	approximate		Patagua			https://gem.wiki/PMGD_Patagua_solar_farm	L832243	G837789	IT0003128367	1	10	10	-99	40	80	120	10	10	10	10	10	10	10	10	10	10	10	10
solar	Chile	Americas	Latin America and the Caribbean	PMGD Rinconada de Alcones solar farm		Parque Solar PMGD Rinconada de Alcones		10.5	construction			PV						Enel Chile		-34.3561	-71.7348	approximate		Rinconada de Alcones			https://gem.wiki/PMGD_Rinconada_de_Alcones_solar_farm	L832244	G837790	IT0003128367	1	10.5	10.5	-99	40	80	120	0	0	0	0	0	0	0	10.5	10.5	10.5	10.5	10.5
solar	Greece	Europe	Southern Europe	Poliyirou Land Plot 47 solar farm		Αγροτεμαχιο 47		1.4	operating			PV						Enel Green Power Greece SA		40.4677	23.3507	exact		Chalkidiki Regional Unit	Central Macedonia	Macedonia and Thrace	https://gem.wiki/Poliyirou_Land_Plot_47_solar_farm	L822632	G825690	IT0003128367	1	1.4	1.4	-99	40	80	120	1.4	1.4	1.4	1.4	1.4	1.4	1.4	1.4	1.4	1.4	1.4	1.4
solar	Greece	Europe	Southern Europe	Polusitos I solar farm		Πολυσιτος Ι		5.4	operating			PV						Enel Green Power Greece SA		41.0865	25.0176	exact		Xanthi Regional Unit	Eastern Macedonia and Thrace	Macedonia and Thrace	https://gem.wiki/Polusitos_I_solar_farm	L822633	G825691	IT0003128367	1	5.4	5.4	-99	40	80	120	5.4	5.4	5.4	5.4	5.4	5.4	5.4	5.4	5.4	5.4	5.4	5.4
solar	South Africa	Africa	Sub-Saharan Africa	Pulida Solar Park				83	operating	2017		Assumed PV						Enel Green Power SPA		-29.0438	24.9256	exact	Letsemeng Local Municipality	Xhariep District Municipality		Free State	https://gem.wiki/Pulida_Solar_Park	L800266	G800318	IT0003128367	1	83	83	7	2057	2097	2137	83	83	83	83	83	83	83	83	83	83	83	83
solar	Spain	Europe	Southern Europe	Quijote solar farm				42.2	operating	2019		PV						Enel Green Power		38.7824	-6.625	approximate				Extremadura	https://gem.wiki/Quijote_solar_farm	L824820	G828047	IT0003128367	1	42.2	42.2	5	2059	2099	2139	42.2	42.2	42.2	42.2	42.2	42.2	42.2	42.2	42.2	42.2	42.2	42.2
solar	United States	Americas	Northern America	Roadrunner (Enel) solar farm	1			200	operating	2020		PV						Enel Green Power SPA		31.2194	-102.192	exact		Upton County		Texas	https://gem.wiki/Roadrunner_(Enel)_solar_farm	L804452	G805117	IT0003128367	1	400		4	2060	2100	2140	200	200	200	200	200	200	200	200	200	200	200	200
solar	United States	Americas	Northern America	Roadrunner (Enel) solar farm	2			200	operating	2020		PV						Enel Green Power SPA		31.2194	-102.192	exact		Upton County		Texas	https://gem.wiki/Roadrunner_(Enel)_solar_farm	L804452	G805118	IT0003128367	1	400	400	4	2060	2100	2140	200	200	200	200	200	200	200	200	200	200	200	200
solar	Spain	Europe	Southern Europe	Rocinante solar farm				117	pre-construction			PV						Enel Green Power		38.6648	-4.1406	approximate		Campo de Calatrava	Ciudad Real	Castile-La Mancha	https://gem.wiki/Rocinante_solar_farm	L824836	G828066	IT0003128367	1	117	117	-99	40	80	120	0	0	0	0	0	0	0	0	0	0	0	0
solar	Peru	Americas	Latin America and the Caribbean	Rubí 5 solar farm	1	Central Solar Rubí 5		331.7	pre-construction	2025		PV						Enel Green Power SPA		-17.2018	-70.9332	approximate	Moquegua			Moquegua	https://gem.wiki/Rubí_5_solar_farm	L832624	G838211	IT0003128367	1	663.4		-1	2065	2105	2145	0	0	0	0	0	0	0	0	0	0	0	0
solar	Peru	Americas	Latin America and the Caribbean	Rubí 5 solar farm	2	Central Solar Rubí 5		331.7	pre-construction	2026		PV						Enel Green Power SPA		-17.2018	-70.9332	approximate	Moquegua			Moquegua	https://gem.wiki/Rubí_5_solar_farm	L832624	G838212	IT0003128367	1	663.4	663.4	-2	2066	2106	2146	0	0	0	0	0	0	0	0	0	0	0	0
solar	Peru	Americas	Latin America and the Caribbean	Rubí Solar Photovoltaic Plant		Proyecto Solar Rubí		180	operating	2018		PV						Enel Green Power SPA		-17.2582	-71.1934	exact	Moquegua		Moquegua	Moquegua	https://gem.wiki/Rubí_Solar_Photovoltaic_Plant	L807178	G808414	IT0003128367	1	180	180	6	2058	2098	2138	180	180	180	180	180	180	180	180	180	180	180	180
solar	Peru	Americas	Latin America and the Caribbean	Ruta del Sol solar farm		Central Solar Ruta del Sol		307.7	pre-construction	2024		PV						Enel Green Power SPA		-17.2003	-70.9442	approximate	Moquegua			Moquegua	https://gem.wiki/Ruta_del_Sol_solar_farm	L832626	G838214	IT0003128367	1	307.7	307.7	0	2064	2104	2144	0	0	0	0	0	0	0	0	0	0	0	0
solar	Chile	Americas	Latin America and the Caribbean	Samantha Optimization Solar Park		Optimización Parque Solar Samantha		116	shelved			PV						Enel Chile		-33.1078	-70.7798	approximate			Til-Til	Metropolitana	https://gem.wiki/Samantha_Optimization_Solar_Park	L807169	G808403	IT0003128367	1	116	116	-99	40	80	120	0	0	0	0	0	0	0	0	0	0	0	0
solar	Brazil	Americas	Latin America and the Caribbean	São Gonçalo Solar Park	1	Parque Solar São Gonçalo		46	operating	2020		PV						Enel Green Power SPA		-10.0916	-45.2644	exact	São Gonçalo do Gurguéia		Região Geográfica Intermediária de Corrente-Bom Jesus	Piauí	https://gem.wiki/São_Gonçalo_Solar_Park	L807159	G808379	IT0003128367	1	793		4	2060	2100	2140	46	46	46	46	46	46	46	46	46	46	46	46
solar	Brazil	Americas	Latin America and the Caribbean	São Gonçalo Solar Park	10	Parque Solar São Gonçalo		50	operating	2020		PV						Enel Green Power SPA		-10.1129	-45.2915	exact	São Gonçalo do Gurguéia		Região Geográfica Intermediária de Corrente-Bom Jesus	Piauí	https://gem.wiki/São_Gonçalo_Solar_Park	L807159	G808380	IT0003128367	1	793		4	2060	2100	2140	50	50	50	50	50	50	50	50	50	50	50	50
solar	Brazil	Americas	Latin America and the Caribbean	São Gonçalo Solar Park	11	Parque Solar São Gonçalo		35	operating	2020		PV						Enel Green Power SPA		-10.1235	-45.2886	exact	São Gonçalo do Gurguéia		Região Geográfica Intermediária de Corrente-Bom Jesus	Piauí	https://gem.wiki/São_Gonçalo_Solar_Park	L807159	G808381	IT0003128367	1	793		4	2060	2100	2140	35	35	35	35	35	35	35	35	35	35	35	35
solar	Brazil	Americas	Latin America and the Caribbean	São Gonçalo Solar Park	12	Parque Solar São Gonçalo		35	operating	2020		PV						Enel Green Power SPA		-10.1203	-45.2846	exact	São Gonçalo do Gurguéia		Região Geográfica Intermediária de Corrente-Bom Jesus	Piauí	https://gem.wiki/São_Gonçalo_Solar_Park	L807159	G808382	IT0003128367	1	793		4	2060	2100	2140	35	35	35	35	35	35	35	35	35	35	35	35
solar	Brazil	Americas	Latin America and the Caribbean	São Gonçalo Solar Park	2	Parque Solar São Gonçalo		50	operating	2020		PV						Enel Green Power SPA		-10.0965	-45.2744	exact	São Gonçalo do Gurguéia		Região Geográfica Intermediária de Corrente-Bom Jesus	Piauí	https://gem.wiki/São_Gonçalo_Solar_Park	L807159	G808383	IT0003128367	1	793		4	2060	2100	2140	50	50	50	50	50	50	50	50	50	50	50	50
solar	Brazil	Americas	Latin America and the Caribbean	São Gonçalo Solar Park	21	Parque Solar São Gonçalo		50	operating	2020		PV						Enel Green Power SPA		-10.1058	-45.2788	exact	São Gonçalo do Gurguéia		Região Geográfica Intermediária de Corrente-Bom Jesus	Piauí	https://gem.wiki/São_Gonçalo_Solar_Park	L807159	G808384	IT0003128367	1	793		4	2060	2100	2140	50	50	50	50	50	50	50	50	50	50	50	50
solar	Brazil	Americas	Latin America and the Caribbean	São Gonçalo Solar Park	22	Parque Solar São Gonçalo		50	operating	2020		PV						Enel Green Power SPA		-10.0979	-45.263	exact	São Gonçalo do Gurguéia		Região Geográfica Intermediária de Corrente-Bom Jesus	Piauí	https://gem.wiki/São_Gonçalo_Solar_Park	L807159	G808385	IT0003128367	1	793		4	2060	2100	2140	50	50	50	50	50	50	50	50	50	50	50	50
solar	Brazil	Americas	Latin America and the Caribbean	São Gonçalo Solar Park	3	Parque Solar São Gonçalo		46	operating	2020		PV						Enel Green Power SPA		-10.0991	-45.2815	exact	São Gonçalo do Gurguéia		Região Geográfica Intermediária de Corrente-Bom Jesus	Piauí	https://gem.wiki/São_Gonçalo_Solar_Park	L807159	G808386	IT0003128367	1	793		4	2060	2100	2140	46	46	46	46	46	46	46	46	46	46	46	46
solar	Brazil	Americas	Latin America and the Caribbean	São Gonçalo Solar Park	4	Parque Solar São Gonçalo		50	operating	2020		PV						Enel Green Power SPA		-10.1205	-45.2969	exact	São Gonçalo do Gurguéia		Região Geográfica Intermediária de Corrente-Bom Jesus	Piauí	https://gem.wiki/São_Gonçalo_Solar_Park	L807159	G808387	IT0003128367	1	793		4	2060	2100	2140	50	50	50	50	50	50	50	50	50	50	50	50
solar	Brazil	Americas	Latin America and the Caribbean	São Gonçalo Solar Park	5	Parque Solar São Gonçalo		50	operating	2020		PV						Enel Green Power SPA		-10.1077	-45.2997	exact	São Gonçalo do Gurguéia		Região Geográfica Intermediária de Corrente-Bom Jesus	Piauí	https://gem.wiki/São_Gonçalo_Solar_Park	L807159	G808388	IT0003128367	1	793		4	2060	2100	2140	50	50	50	50	50	50	50	50	50	50	50	50
solar	Brazil	Americas	Latin America and the Caribbean	São Gonçalo Solar Park	6	Parque Solar São Gonçalo		46	operating	2020		PV						Enel Green Power SPA		-10.1146	-45.3006	exact	São Gonçalo do Gurguéia		Região Geográfica Intermediária de Corrente-Bom Jesus	Piauí	https://gem.wiki/São_Gonçalo_Solar_Park	L807159	G808389	IT0003128367	1	793		4	2060	2100	2140	46	46	46	46	46	46	46	46	46	46	46	46
solar	Brazil	Americas	Latin America and the Caribbean	São Gonçalo Solar Park	7	Parque Solar São Gonçalo		35	operating	2020		PV						Enel Green Power SPA		-10.1284	-45.2986	exact	São Gonçalo do Gurguéia		Região Geográfica Intermediária de Corrente-Bom Jesus	Piauí	https://gem.wiki/São_Gonçalo_Solar_Park	L807159	G808390	IT0003128367	1	793		4	2060	2100	2140	35	35	35	35	35	35	35	35	35	35	35	35
solar	Brazil	Americas	Latin America and the Caribbean	São Gonçalo Solar Park	8	Parque Solar São Gonçalo		35	operating	2020		PV						Enel Green Power SPA		-10.1234	-45.2931	exact	São Gonçalo do Gurguéia		Região Geográfica Intermediária de Corrente-Bom Jesus	Piauí	https://gem.wiki/São_Gonçalo_Solar_Park	L807159	G808391	IT0003128367	1	793		4	2060	2100	2140	35	35	35	35	35	35	35	35	35	35	35	35
solar	Brazil	Americas	Latin America and the Caribbean	São Gonçalo Solar Park	14	Parque Solar São Gonçalo		43	operating	2022		PV						Enel Green Power SPA		-10.1109	-45.2792	exact	São Gonçalo do Gurguéia		Região Geográfica Intermediária de Corrente-Bom Jesus	Piauí	https://gem.wiki/São_Gonçalo_Solar_Park	L807159	G808374	IT0003128367	1	793		2	2062	2102	2142	0	0	43	43	43	43	43	43	43	43	43	43
solar	Brazil	Americas	Latin America and the Caribbean	São Gonçalo Solar Park	15	Parque Solar São Gonçalo		43	operating	2022		PV						Enel Green Power SPA		-10.1117	-45.2659	exact	São Gonçalo do Gurguéia		Região Geográfica Intermediária de Corrente-Bom Jesus	Piauí	https://gem.wiki/São_Gonçalo_Solar_Park	L807159	G808375	IT0003128367	1	793		2	2062	2102	2142	0	0	43	43	43	43	43	43	43	43	43	43
solar	Brazil	Americas	Latin America and the Caribbean	São Gonçalo Solar Park	17	Parque Solar São Gonçalo		43	operating	2022		PV						Enel Green Power SPA		-10.1161	-45.2738	exact	São Gonçalo do Gurguéia		Região Geográfica Intermediária de Corrente-Bom Jesus	Piauí	https://gem.wiki/São_Gonçalo_Solar_Park	L807159	G808376	IT0003128367	1	793		2	2062	2102	2142	0	0	43	43	43	43	43	43	43	43	43	43
solar	Brazil	Americas	Latin America and the Caribbean	São Gonçalo Solar Park	18	Parque Solar São Gonçalo		43	operating	2022		PV						Enel Green Power SPA		-10.107	-45.2701	exact	São Gonçalo do Gurguéia		Região Geográfica Intermediária de Corrente-Bom Jesus	Piauí	https://gem.wiki/São_Gonçalo_Solar_Park	L807159	G808377	IT0003128367	1	793		2	2062	2102	2142	0	0	43	43	43	43	43	43	43	43	43	43
solar	Brazil	Americas	Latin America and the Caribbean	São Gonçalo Solar Park	19	Parque Solar São Gonçalo		43	operating	2022		PV						Enel Green Power SPA		-10.119	-45.281	exact	São Gonçalo do Gurguéia		Região Geográfica Intermediária de Corrente-Bom Jesus	Piauí	https://gem.wiki/São_Gonçalo_Solar_Park	L807159	G808378	IT0003128367	1	793	793	2	2062	2102	2142	0	0	43	43	43	43	43	43	43	43	43	43
solar	Spain	Europe	Southern Europe	Sedéis solar farm	5			49.7	construction			PV						Enel Green Power		40.9951	-0.3872	exact		Andorra-Sierra de Arcos		Aragon	https://gem.wiki/Sedéis_solar_farm	L824857	G828097	IT0003128367	1	49.7	49.7	-99	40	80	120	0	0	0	0	0	0	0	49.7	49.7	49.7	49.7	49.7
solar	Chile	Americas	Latin America and the Caribbean	Sierra Gorda solar farm		Planta Fotovoltaica Sierra Gorda Solar		400	construction	2024		PV						Enel Chile		-23.6217	-70.3776	approximate	Antofagasta	Provincia de Antofagasta		Antofagasta Region	https://gem.wiki/Sierra_Gorda_solar_farm	L832281	G837828	IT0003128367	1	400	400	0	2064	2104	2144	0	0	0	0	400	400	400	400	400	400	400	400
solar	Chile	Americas	Latin America and the Caribbean	Sol De Lila Photovoltaic Solar Project		Proyecto Solar Fotovoltaico Sol de Lila		163	operating	2021		PV						Enel Chile		-33.4665	-70.673	approximate				Antofagasta	https://gem.wiki/Sol_De_Lila_Photovoltaic_Solar_Project	L807170	G808404	IT0003128367	1	163	163	3	2061	2101	2141	0	163	163	163	163	163	163	163	163	163	163	163
solar	Greece	Europe	Southern Europe	Sounio solar farm		Σουνιο		1.6	operating			PV						Enel Green Power Greece SA		41.1144	25.0492	exact		Xanthi Regional Unit	Eastern Macedonia and Thrace	Macedonia and Thrace	https://gem.wiki/Sounio_solar_farm	L822672	G825731	IT0003128367	1	1.6	1.6	-99	40	80	120	1.6	1.6	1.6	1.6	1.6	1.6	1.6	1.6	1.6	1.6	1.6	1.6
solar	United States	Americas	Northern America	Stillwater Facility solar farm	1			22	operating	2012		PV						Enel Green Power SPA		39.5475	-118.556	exact		Churchill County		Nevada	https://gem.wiki/Stillwater_Facility_solar_farm	L804447	G805119	IT0003128367	1	42		12	2052	2092	2132	22	22	22	22	22	22	22	22	22	22	22	22
solar	United States	Americas	Northern America	Stillwater Facility solar farm	2		Wynn Solar Facility, EGP Stillwater Solar PV 2	20	operating	2018		PV						Enel Green Power SPA		39.542	-118.56	exact		Churchill County		Nevada	https://gem.wiki/Stillwater_Facility_solar_farm	L804447	G805112	IT0003128367	1	42	42	6	2058	2098	2138	20	20	20	20	20	20	20	20	20	20	20	20
solar	Peru	Americas	Latin America and the Caribbean	Sumac Nina 1 solar farm		Central Solar Sumac Nina 1		446.8	pre-construction	2025		PV						Enel Green Power SPA		-16.4318	-73.1032	approximate				Arequipa	https://gem.wiki/Sumac_Nina_1_solar_farm	L832632	G838220	IT0003128367	1	446.8	446.8	-1	2065	2105	2145	0	0	0	0	0	0	0	0	0	0	0	0
solar	Peru	Americas	Latin America and the Caribbean	Sunilo Solar farm		Parque Solar Sunilo		120	operating	2023		PV						Enel Green Power SPA		-17.6212	-71.2699	approximate				Moquegua	https://gem.wiki/Sunilo_Solar_farm	L808308	G810481	IT0003128367	1	120	120	1	2063	2103	2143	0	0	0	120	120	120	120	120	120	120	120	120
solar	Chile	Americas	Latin America and the Caribbean	Taltal PV Solar Project		Proyecto Solar Taltal		317	pre-construction	2023		PV						Enel Chile		-25.3953	-69.8573	approximate			Taltal	Antofagasta	https://gem.wiki/Taltal_PV_Solar_Project	L807171	G808405	IT0003128367	1	317	317	1	2063	2103	2143	0	0	0	0	0	0	0	0	0	0	0	0
solar	India	Asia	Southern Asia	Thar solar farm			Thar Surya-1	420	operating	2022		PV						Enel Green Power SPA; KLP		28.0198	73.2539	exact	Bikaner	Bikaner Tehsil	Bikaner	Rajasthan	https://gem.wiki/Thar_solar_farm	L808951	G811257	IT0003128367	0.5	420	420	2	2062	2102	2142	0	0	210	210	210	210	210	210	210	210	210	210
solar	South Africa	Africa	Sub-Saharan Africa	Tom Burke Solar Park				66	operating	2016		Assumed PV						Enel Green Power SPA		-23.0716	27.9853	exact	Lephalale Local Municipality	Waterberg District Municipality		Limpopo	https://gem.wiki/Tom_Burke_Solar_Park	L800330	G800401	IT0003128367	1	66	66	8	2056	2096	2136	66	66	66	66	66	66	66	66	66	66	66	66
solar	Italy	Europe	Southern Europe	Trino Solar				60	operating			PV						Enel Green Power SPA		45.0607	7.9235	approximate				Piedmont	https://gem.wiki/Trino_Solar	L805790	G806664	IT0003128367	1	60	60	-99	40	80	120	60	60	60	60	60	60	60	60	60	60	60	60
solar	United States	Americas	Northern America	TWE Bowman Solar Project			Bowman Tradewind Solar Farm	75	operating	2020		PV						Enel Green Power SPA		33.3162	-80.6824	exact		Orangeburg County		South Carolina	https://gem.wiki/TWE_Bowman_Solar_Project	L805044	G805815	IT0003128367	1	75	75	4	2060	2100	2140	75	75	75	75	75	75	75	75	75	75	75	75
solar	Chile	Americas	Latin America and the Caribbean	Valle del Sol solar farm		Parque Solar Valle del Sol		160	operating	2023		PV						Enel Chile		-22.3465	-69.6775	approximate		Provincia de Tocopilla		Antofagasta Region	https://gem.wiki/Valle_del_Sol_solar_farm	L808010	G810112	IT0003128367	1	160	160	1	2063	2103	2143	0	0	0	160	160	160	160	160	160	160	160	160
solar	Spain	Europe	Southern Europe	Villameca (Enel) solar farm				196	pre-construction			PV						Enel Green Power		42.6402	-6.074	approximate			León	Castile and León	https://gem.wiki/Villameca_(Enel)_solar_farm	L824944	G828205	IT0003128367	1	196	196	-99	40	80	120	0	0	0	0	0	0	0	0	0	0	0	0
solar	Mexico	Americas	Latin America and the Caribbean	Villanueva solar farm	Expansion	Planta Solar Villanueva (Exp)		150	pre-construction			PV						Enel Green Power		25.5607	-103.05	approximate				Coahuila	https://gem.wiki/Villanueva_solar_farm	L832594	G838171	IT0003128367	1	150	150	-99	40	80	120	0	0	0	0	0	0	0	0	0	0	0	0
solar	Greece	Europe	Southern Europe	Voreios Platanos solar farm		Βορειος Πλατανος	North Platanos	83.8	pre-construction			PV						Enel Green Power Greece SA		39.2359	22.5303	exact		Larisa Regional Unit	Thessaly	Thessaly and Central Greece	https://gem.wiki/Voreios_Platanos_solar_farm	L806285	G807220	IT0003128367	1	83.8	83.8	-99	40	80	120	0	0	0	0	0	0	0	0	0	0	0	0
solar	Spain	Europe	Southern Europe	Zurbarán (Enel) solar farm				42.9	operating	2019		PV						Enel Green Power		39.0656	-5.7224	approximate			Badajoz	Extremadura	https://gem.wiki/Zurbarán_(Enel)_solar_farm	L824973	G828246	IT0003128367	1	42.9	42.9	5	2059	2099	2139	42.9	42.9	42.9	42.9	42.9	42.9	42.9	42.9	42.9	42.9	42.9	42.9
wind	United States	Americas	Northern America	25 Mile Creek wind farm	1			250	operating	2022		onshore						Enel Green Power		36.4768	-99.7885	exact		Ellis County		Oklahoma	https://gem.wiki/25_Mile_Creek_wind_farm	L907500	G910126	IT0003128367	1	250	250	2	2062	2102	2142	0	0	250	250	250	250	250	250	250	250	250	250
wind	Spain	Europe	Southern Europe	A Capelada wind farm	1			17	operating	1997		onshore						Enel Green Power España		43.7171	-7.9369	exact		Ferrol		Galicia	https://gem.wiki/A_Capelada_wind_farm	L910145	G913673	IT0003128367	1	32		27	2037	2077	2117	17	17	17	17	17	17	17	17	17	17	17	17
wind	Spain	Europe	Southern Europe	A Capelada wind farm	2			15	operating	1998		onshore						Enel Green Power España		43.6867	-7.9596	exact		Ferrol		Galicia	https://gem.wiki/A_Capelada_wind_farm	L910145	G912970	IT0003128367	1	32	32	26	2038	2078	2118	15	15	15	15	15	15	15	15	15	15	15	15
wind	Morocco	Africa	Northern Africa	Aferkat wind farm		مزرعة الطاقة الريحية "أفركات" , Projet De Parc Aferkat	Aferkat 80MW park project	80	pre-construction	2023		onshore						Enel Green Power		31.1728	-7.3362	approximate				Guilmim-Oued Noun	https://gem.wiki/Aferkat_wind_farm	L900023	G900025	IT0003128367	1	80	80	1	2063	2103	2143	0	0	0	0	0	0	0	0	0	0	0	0
wind	Romania	Europe	Eastern Europe	Agighiohl Valea Nucarilor wind farm	1		Cee Valea Nucarilor 3	35	operating	2010		onshore						Enel Green Power Romania SRL		45.0397	28.9435	approximate	Valea Nucarilor	Tulcea		Dobruja	https://gem.wiki/Agighiohl_Valea_Nucarilor_wind_farm	L913766	G917107	IT0003128367	1	35	35	14	2050	2090	2130	35	35	35	35	35	35	35	35	35	35	35	35
wind	Spain	Europe	Southern Europe	Ágreda wind farm				18	operating	2013		onshore						Enel Green Power España		41.8559	-1.9224	exact			Soria	Castile and León	https://gem.wiki/Ágreda_wind_farm	L910977	G913898	IT0003128367	1	18	18	11	2053	2093	2133	18	18	18	18	18	18	18	18	18	18	18	18
wind	Spain	Europe	Southern Europe	Aldeavieja wind farm				15	operating			onshore						Enel Green Power España		40.7201	-4.4701	exact	Santa María del Cubillo		Ávila	Castile and León	https://gem.wiki/Aldeavieja_wind_farm	L910150	G912976	IT0003128367	1	15	15	-99	40	80	120	15	15	15	15	15	15	15	15	15	15	15	15
wind	Spain	Europe	Southern Europe	Alfajarín wind farm				25	pre-construction			onshore						Enel Green Power España		41.681	-0.5072	approximate	Farlete			Aragón	https://gem.wiki/Alfajarín_wind_farm	L912582	G915712	IT0003128367	1	25		-99	40	80	120	0	0	0	0	0	0	0	0	0	0	0	0
wind	Spain	Europe	Southern Europe	Allueva wind farm				25	operating	2019		onshore						Enel Green Power España		40.996	-1.039	exact	Allueva	Jiloca		Aragon	https://gem.wiki/Allueva_wind_farm	L912583	G915713	IT0003128367	1	25	25	5	2059	2099	2139	25	25	25	25	25	25	25	25	25	25	25	25
wind	Spain	Europe	Southern Europe	Almaren wind farm				12	operating	2008		onshore						Enel Green Power España		41.451	-1.613	exact		Comunidad de Calatayud		Aragon	https://gem.wiki/Almaren_wind_farm	L908714	G911427	IT0003128367	1	12	12	16	2048	2088	2128	12	12	12	12	12	12	12	12	12	12	12	12
wind	United States	Americas	Northern America	Alta Farms II Wind Project	2			200	construction	2023		onshore						Enel Green Power		40.1914	-89.0575	exact	Clinton	DeWitt County		Illinois	https://gem.wiki/Alta_Farms_II_Wind_Project	L907410	G909982	IT0003128367	1	200	200	1	2063	2103	2143	0	0	0	200	200	200	200	200	200	200	200	200
wind	Spain	Europe	Southern Europe	Alto Cabrera wind farm				114	shelved			onshore						Enel Green Power España		42.5892	-5.5633	approximate	Carballeda de Valdeorras			Castilla y León	https://gem.wiki/Alto_Cabrera_wind_farm	L915765	G919488	IT0003128367	1	114	114	-99	40	80	120	0	0	0	0	0	0	0	0	0	0	0	0
wind	Spain	Europe	Southern Europe	Alto Casillas wind farm	1		Casillas	30	operating	2008		onshore						Enel Green Power España		39.9991	-0.6267	exact		Castelló / Castellón		Valencian Community	https://gem.wiki/Alto_Casillas_wind_farm	L913210	G916443	IT0003128367	1	60		16	2048	2088	2128	30	30	30	30	30	30	30	30	30	30	30	30
wind	Spain	Europe	Southern Europe	Alto Casillas wind farm	2		Casillas	30	operating	2008		onshore						Enel Green Power España		39.9991	-0.6267	exact		Castelló / Castellón		Valencian Community	https://gem.wiki/Alto_Casillas_wind_farm	L913210	G916444	IT0003128367	1	60	60	16	2048	2088	2128	30	30	30	30	30	30	30	30	30	30	30	30
wind	Spain	Europe	Southern Europe	Altos De Cartagena wind farm				21	operating	2002		onshore						Enel Green Power España		40.6301	-4.3401	exact			Ávila	Castile and León	https://gem.wiki/Altos_De_Cartagena_wind_farm	L911807	G914830	IT0003128367	1	21	21	22	2042	2082	2122	21	21	21	21	21	21	21	21	21	21	21	21
wind	Portugal	Europe	Southern Europe	Alvaiázere wind farm	1		Parque Eólico Alvaiázere	18	operating	2011		onshore						Enel Green Power SPA		39.8289	-8.4128	exact	Alvaiázere	Leiria			https://gem.wiki/Alvaiázere_wind_farm	L910981	G913903	IT0003128367	1	18	18	13	2051	2091	2131	18	18	18	18	18	18	18	18	18	18	18	18
wind	Mexico	Americas	Latin America and the Caribbean	Amistad wind farm	1	Parque Eólico Amistad		200	operating			onshore						Enel Green Power SPA		29.6288	-101.666	exact	Acuna			Coahuila	https://gem.wiki/Amistad_wind_farm	L905219	G906845	IT0003128367	1	549		-99	40	80	120	200	200	200	200	200	200	200	200	200	200	200	200
wind	Mexico	Americas	Latin America and the Caribbean	Amistad wind farm	2	Parque Eólico Amistad		100	construction			onshore						Enel Green Power SPA		29.3777	-101.065	exact	Acuna			Coahuila	https://gem.wiki/Amistad_wind_farm	L905219	G906846	IT0003128367	1	549		-99	40	80	120	0	0	0	0	0	0	0	100	100	100	100	100
wind	Mexico	Americas	Latin America and the Caribbean	Amistad wind farm	3	Parque Eólico Amistad		100	pre-construction			onshore						Enel Green Power SPA		29.5986	-101.666	approximate	Acuna			Coahuila	https://gem.wiki/Amistad_wind_farm	L905219	G906847	IT0003128367	1	549		-99	40	80	120	0	0	0	0	0	0	0	0	0	0	0	0
wind	Mexico	Americas	Latin America and the Caribbean	Amistad wind farm	4	Parque Eólico Amistad		149	pre-construction			onshore						Enel Green Power SPA		29.5986	-101.666	approximate	Acuna			Coahuila	https://gem.wiki/Amistad_wind_farm	L905219	G906848	IT0003128367	1	549	549	-99	40	80	120	0	0	0	0	0	0	0	0	0	0	0	0
wind	Greece	Europe	Southern Europe	Anatole wind farm		Ανατολη	Kafireas	16	operating	2019		onshore						Enel Green Power Greece SA		38.1191	24.5406	exact		Euboea Regional Unit	Central Greece	Thessaly and Central Greece	https://gem.wiki/Anatole_wind_farm	L910689	G913579	IT0003128367	1	16	16	5	2059	2099	2139	16	16	16	16	16	16	16	16	16	16	16	16
wind	United States	Americas	Northern America	Aquilla Wind	1			300	pre-construction			onshore						Enel Green Power		32.0129	-97.1901	approximate				Texas	https://gem.wiki/Aquilla_Wind	L921919	G927230	IT0003128367	1	300	300	-99	40	80	120	0	0	0	0	0	0	0	0	0	0	0	0
wind	Brazil	Americas	Latin America and the Caribbean	Aroeira wind farm	1	Complexo Eólico Aroeira		47	construction	2024		onshore						Enel Green Power Brasil Participações LTDA		-12.5779	-38.0049	approximate	Morro do Chapéu			Bahia	https://gem.wiki/Aroeira_wind_farm	L905282	G906983	IT0003128367	1	447		0	2064	2104	2144	0	0	0	0	47	47	47	47	47	47	47	47
wind	Brazil	Americas	Latin America and the Caribbean	Aroeira wind farm	2	Complexo Eólico Aroeira		43	construction	2024		onshore						Enel Green Power Brasil Participações LTDA		-12.5779	-38.0049	approximate	Morro do Chapéu			Bahia	https://gem.wiki/Aroeira_wind_farm	L905282	G906984	IT0003128367	1	447		0	2064	2104	2144	0	0	0	0	43	43	43	43	43	43	43	43
wind	Brazil	Americas	Latin America and the Caribbean	Aroeira wind farm	3	Complexo Eólico Aroeira		43	construction	2024		onshore						Enel Green Power Brasil Participações LTDA		-12.5779	-38.0049	approximate	Morro do Chapéu			Bahia	https://gem.wiki/Aroeira_wind_farm	L905282	G906985	IT0003128367	1	447		0	2064	2104	2144	0	0	0	0	43	43	43	43	43	43	43	43
wind	Brazil	Americas	Latin America and the Caribbean	Aroeira wind farm	4	Complexo Eólico Aroeira		43	construction	2024		onshore						Enel Green Power Brasil Participações LTDA		-12.5779	-38.0049	approximate	Morro do Chapéu			Bahia	https://gem.wiki/Aroeira_wind_farm	L905282	G906986	IT0003128367	1	447		0	2064	2104	2144	0	0	0	0	43	43	43	43	43	43	43	43
wind	Brazil	Americas	Latin America and the Caribbean	Aroeira wind farm	5	Complexo Eólico Aroeira		43	construction	2024		onshore						Enel Green Power Brasil Participações LTDA		-12.5779	-38.0049	approximate	Morro do Chapéu			Bahia	https://gem.wiki/Aroeira_wind_farm	L905282	G906987	IT0003128367	1	447		0	2064	2104	2144	0	0	0	0	43	43	43	43	43	43	43	43
wind	Brazil	Americas	Latin America and the Caribbean	Aroeira wind farm	6	Complexo Eólico Aroeira		39	construction	2024		onshore						Enel Green Power Brasil Participações LTDA		-12.5779	-38.0049	approximate	Morro do Chapéu			Bahia	https://gem.wiki/Aroeira_wind_farm	L905282	G906988	IT0003128367	1	447		0	2064	2104	2144	0	0	0	0	39	39	39	39	39	39	39	39
wind	Brazil	Americas	Latin America and the Caribbean	Aroeira wind farm	7	Complexo Eólico Aroeira		47	construction	2024		onshore						Enel Green Power Brasil Participações LTDA		-12.5779	-38.0049	approximate	Morro do Chapéu			Bahia	https://gem.wiki/Aroeira_wind_farm	L905282	G906989	IT0003128367	1	447		0	2064	2104	2144	0	0	0	0	47	47	47	47	47	47	47	47
wind	Brazil	Americas	Latin America and the Caribbean	Aroeira wind farm	8	Complexo Eólico Aroeira		43	construction	2024		onshore						Enel Green Power Brasil Participações LTDA		-12.5779	-38.0049	approximate	Morro do Chapéu			Bahia	https://gem.wiki/Aroeira_wind_farm	L905282	G906990	IT0003128367	1	447		0	2064	2104	2144	0	0	0	0	43	43	43	43	43	43	43	43
wind	Brazil	Americas	Latin America and the Caribbean	Aroeira wind farm	9	Complexo Eólico Aroeira		47	pre-construction	2024		onshore						Enel Green Power Brasil Participações LTDA		-12.5779	-38.0049	approximate	Morro do Chapéu			Bahia	https://gem.wiki/Aroeira_wind_farm	L905282	G906991	IT0003128367	1	447		0	2064	2104	2144	0	0	0	0	0	0	0	0	0	0	0	0
wind	Brazil	Americas	Latin America and the Caribbean	Aroeira wind farm	10	Complexo Eólico Aroeira		26	pre-construction	2024		onshore						Enel Green Power Brasil Participações LTDA		-12.5779	-38.0049	approximate	Morro do Chapéu			Bahia	https://gem.wiki/Aroeira_wind_farm	L905282	G906992	IT0003128367	1	447		0	2064	2104	2144	0	0	0	0	0	0	0	0	0	0	0	0
wind	Brazil	Americas	Latin America and the Caribbean	Aroeira wind farm	11	Complexo Eólico Aroeira		26	pre-construction	2024		onshore						Enel Green Power Brasil Participações LTDA		-12.5779	-38.0049	approximate	Morro do Chapéu			Bahia	https://gem.wiki/Aroeira_wind_farm	L905282	G906993	IT0003128367	1	447	447	0	2064	2104	2144	0	0	0	0	0	0	0	0	0	0	0	0
wind	Greece	Europe	Southern Europe	Aspre Petra wind farm		Ασπρη Πετρα	Aspri Petra	20	operating	2003		onshore						Enel Green Power Greece SA		41.1628	25.8683	exact		Rodopi Regional Unit	Eastern Macedonia and Thrace	Macedonia and Thrace	https://gem.wiki/Aspre_Petra_wind_farm	L911444	G914424	IT0003128367	1	20	20	21	2043	2083	2123	20	20	20	20	20	20	20	20	20	20	20	20
wind	United States	Americas	Northern America	Aurora Wind Project	1			299	operating	2021		onshore						Enel Green Power		48.5127	-103.094	exact	Tioga	Williams County		North Dakota	https://gem.wiki/Aurora_Wind_Project	L907555	G910189	IT0003128367	1	299	299	3	2061	2101	2141	0	299	299	299	299	299	299	299	299	299	299	299
wind	Russia	Europe	Eastern Europe	Azov wind farm	1	Азовская ВЭС	Azovskaya	90	operating	2021		onshore						Enel Russia		46.9446	38.8756	exact		Azovsky District		Rostov Oblast	https://gem.wiki/Azov_wind_farm	L905610	G907700	IT0003128367	1	90	90	3	2061	2101	2141	0	90	90	90	90	90	90	90	90	90	90	90
wind	United States	Americas	Northern America	Azure Sky Wind Project	1			350	operating	2023		onshore						Enel Green Power		33.1855	-99.2359	exact		Throckmorton County		Texas	https://gem.wiki/Azure_Sky_Wind_Project	L907624	G910267	IT0003128367	1	350	350	1	2063	2103	2143	0	0	0	350	350	350	350	350	350	350	350	350
wind	Spain	Europe	Southern Europe	Barbanza wind farm	1			29	operating	1997		onshore						Enel Green Power España		42.6687	-8.9619	exact		Noia		Galicia	https://gem.wiki/Barbanza_wind_farm	L913114	G916331	IT0003128367	1	29	29	27	2037	2077	2117	29	29	29	29	29	29	29	29	29	29	29	29
wind	Mexico	Americas	Latin America and the Caribbean	Bii Nee Stipa wind farm	2	Parque Eólico Bii Nee Stipa	Stipa Nayaá	74	operating	2012		onshore						Enel Green Power SPA		16.5106	-94.9689	exact	Juchitán	Heroica Ciudad de Juchitán de Zaragoza		Oaxaca	https://gem.wiki/Bii_Nee_Stipa_wind_farm	L905220	G906849	IT0003128367	1	144		12	2052	2092	2132	74	74	74	74	74	74	74	74	74	74	74	74
wind	Mexico	Americas	Latin America and the Caribbean	Bii Nee Stipa wind farm	3	Parque Eólico Bii Nee Stipa	Stipa Nayaá, Zopiloapan	70	operating	2012		onshore						Enel Green Power SPA		16.5106	-94.9689	exact	Juchitán	Heroica Ciudad de Juchitán de Zaragoza		Oaxaca	https://gem.wiki/Bii_Nee_Stipa_wind_farm	L905220	G906850	IT0003128367	1	144	144	12	2052	2092	2132	70	70	70	70	70	70	70	70	70	70	70	70
wind	United States	Americas	Northern America	Bijou Hills Wind Project	1			400	pre-construction			onshore						Enel Green Power		39.2978	-103.725	approximate	Limon	Elbert County		Colorado	https://gem.wiki/Bijou_Hills_Wind_Project	L907638	G910286	IT0003128367	1	400	400	-99	40	80	120	0	0	0	0	0	0	0	0	0	0	0	0
wind	United States	Americas	Northern America	Bison Meadows Wind And Storage Project	1			200	pre-construction	2026		onshore						Enel Green Power		41.7142	-89.3287	approximate	Amboy	Lee County		Illinois	https://gem.wiki/Bison_Meadows_Wind_And_Storage_Project	L907358	G909910	IT0003128367	1	200	200	-2	2066	2106	2146	0	0	0	0	0	0	0	0	0	0	0	0
wind	United States	Americas	Northern America	Buffalo Dunes wind farm	1			250	operating	2013		onshore						Enel Green Power		37.644	-101.102	exact		Grant County		Kansas	https://gem.wiki/Buffalo_Dunes_wind_farm	L907497	G910123	IT0003128367	1	250	250	11	2053	2093	2133	250	250	250	250	250	250	250	250	250	250	250	250
wind	Spain	Europe	Southern Europe	Caldereros wind farm				38	operating	2008		onshore						Enel Green Power España		40.807	-1.5835	exact			Guadalajara	Castile-La Mancha	https://gem.wiki/Caldereros_wind_farm	L914049	G917427	IT0003128367	1	38	38	16	2048	2088	2128	38	38	38	38	38	38	38	38	38	38	38	38
wind	Spain	Europe	Southern Europe	Campillo De Altobuey wind farm	2		Campillo Wind	91.2	operating	2022		onshore						Enel Green Power		39.643	-1.7426	exact					https://gem.wiki/Campillo_De_Altobuey_wind_farm	L915486	G925550	IT0003128367	1	182.4		2	2062	2102	2142	0	0	91.2	91.2	91.2	91.2	91.2	91.2	91.2	91.2	91.2	91.2
wind	Spain	Europe	Southern Europe	Campillo De Altobuey wind farm	3		Campillo Wind	91.2	operating	2022		onshore						Enel Green Power		39.6374	-1.6991	approximate					https://gem.wiki/Campillo_De_Altobuey_wind_farm	L915486	G925551	IT0003128367	1	182.4	182.4	2	2062	2102	2142	0	0	91.2	91.2	91.2	91.2	91.2	91.2	91.2	91.2	91.2	91.2
wind	Spain	Europe	Southern Europe	Campoliva wind farm	1			36	operating	2019		onshore						Enel Green Power España		41.6801	-0.697	exact	Villamayor de Gállego	Zaragoza		Aragon	https://gem.wiki/Campoliva_wind_farm	L913860	G917213	IT0003128367	1	75		5	2059	2099	2139	36	36	36	36	36	36	36	36	36	36	36	36
wind	Spain	Europe	Southern Europe	Campoliva wind farm	2			39	operating	2019		onshore						Enel Green Power España		41.679	-0.661	exact	Villamayor de Gállego	Zaragoza		Aragon	https://gem.wiki/Campoliva_wind_farm	L913860	G917512	IT0003128367	1	75	75	5	2059	2099	2139	39	39	39	39	39	39	39	39	39	39	39	39
wind	Spain	Europe	Southern Europe	Cañaseca wind farm				18	operating	2020		onshore						Enel Green Power España		41.3787	-0.7639	approximate	Blesa		Zaragosa	Aragón	https://gem.wiki/Cañaseca_wind_farm	L911006	G913929	IT0003128367	1	18	18	4	2060	2100	2140	18	18	18	18	18	18	18	18	18	18	18	18
wind	Chile	Americas	Latin America and the Caribbean	Canela wind farm	1	Parque Eólico Canela		18	operating	2007		onshore						Enel Green Power SPA		-31.2868	-71.6153	exact	Canela	Provincia de Choapa	Choapa	Coquimbo Region	https://gem.wiki/Canela_wind_farm	L905210	G906835	IT0003128367	1	78		17	2047	2087	2127	18	18	18	18	18	18	18	18	18	18	18	18
wind	Chile	Americas	Latin America and the Caribbean	Canela wind farm	2	Parque Eólico Canela		60	operating	2009		onshore						Enel Green Power SPA		-31.2866	-71.6153	exact	Canela	Provincia de Choapa	Choapa	Coquimbo Region	https://gem.wiki/Canela_wind_farm	L905210	G906834	IT0003128367	1	78	78	15	2049	2089	2129	60	60	60	60	60	60	60	60	60	60	60	60
wind	United States	Americas	Northern America	Caney River wind farm	1			200	operating	2011		onshore						Enel Green Power		37.4333	-96.4169	exact		Elk County		Kansas	https://gem.wiki/Caney_River_wind_farm	L907348	G909900	IT0003128367	1	200	200	13	2051	2091	2131	200	200	200	200	200	200	200	200	200	200	200	200
wind	Spain	Europe	Southern Europe	Cantiruela wind farm				15	operating	2008		onshore						Enel Green Power España		42.7201	-3.7501	approximate	Valle de Sedano		Burgos	Castilla y León	https://gem.wiki/Cantiruela_wind_farm	L910184	G913013	IT0003128367	1	15	15	16	2048	2088	2128	15	15	15	15	15	15	15	15	15	15	15	15
wind	Spain	Europe	Southern Europe	Careón wind farm				18	operating	2000		onshore						Enel Green Power España		42.9115	-7.9383	exact		A Ulloa		Galicia	https://gem.wiki/Careón_wind_farm	L911009	G913933	IT0003128367	1	18	18	24	2040	2080	2120	18	18	18	18	18	18	18	18	18	18	18	18
wind	Spain	Europe	Southern Europe	Cascante wind farm	2		Vientos del Cierzo	38	pre-construction			onshore						Enel Green Power España		42.3337	-1.7942	approximate	Cascante	La Ribera		Navarra	https://gem.wiki/Cascante_wind_farm	L914055	G917433	IT0003128367	1	38	38	-99	40	80	120	0	0	0	0	0	0	0	0	0	0	0	0
wind	Spain	Europe	Southern Europe	Castelo wind farm				17	operating	2001		onshore						Enel Green Power España		43.0901	-8.6901	exact		O Xallas		Galicia	https://gem.wiki/Castelo_wind_farm	L910797	G913694	IT0003128367	1	17	17	23	2041	2081	2121	17	17	17	17	17	17	17	17	17	17	17	17
wind	Canada	Americas	Northern America	Castle Rock Ridge wind farm	1			76	operating	2012		onshore						Enel Green Power SPA		49.5811	-114	exact		Municipal District of Pincher Creek No. 9		Alberta	https://gem.wiki/Castle_Rock_Ridge_wind_farm	L906534	G909205	IT0003128367	1	105		12	2052	2092	2132	76	76	76	76	76	76	76	76	76	76	76	76
wind	Canada	Americas	Northern America	Castle Rock Ridge wind farm	2			29	operating	2020		onshore						Enel Green Power SPA		49.5287	-113.796	exact		Municipal District of Pincher Creek No. 9		Alberta	https://gem.wiki/Castle_Rock_Ridge_wind_farm	L906534	G908823	IT0003128367	1	105	105	4	2060	2100	2140	29	29	29	29	29	29	29	29	29	29	29	29
wind	United States	Americas	Northern America	Cedar Run Wind Project	1			150	pre-construction			onshore						Enel Green Power		35.6961	-96.8898	approximate		Lincoln County		Oklahoma	https://gem.wiki/Cedar_Run_Wind_Project	L907200	G909705	IT0003128367	1	150	150	-99	40	80	120	0	0	0	0	0	0	0	0	0	0	0	0
wind	Spain	Europe	Southern Europe	Chan Do Tenón wind farm				22	operating	2007		onshore						Enel Green Power España		43.6094	-7.6747	exact		A Mariña Occidental		Galicia	https://gem.wiki/Chan_Do_Tenón_wind_farm	L912038	G915093	IT0003128367	1	22	22	17	2047	2087	2127	22	22	22	22	22	22	22	22	22	22	22	22
wind	Colombia	Americas	Latin America and the Caribbean	Chemesky wind farm		Parque Eólico Chemesky	Urraichi Chemesky	112	pre-construction	2024		onshore						Enel Green Power SPA		11.9917	-71.6769	approximate	Uribia			La Guajira	https://gem.wiki/Chemesky_wind_farm	L905183	G906746	IT0003128367	1	112	112	0	2064	2104	2144	0	0	0	0	0	0	0	0	0	0	0	0
wind	United States	Americas	Northern America	CHI Wind	1		CHI Energy Wind Farms	30	operating	2000		onshore						Enel Green Power		43.9801	-96.0107	exact		Murray County		Minnesota	https://gem.wiki/CHI_Wind	L917209	G921353	IT0003128367	1	30	30	24	2040	2080	2120	30	30	30	30	30	30	30	30	30	30	30	30
wind	United States	Americas	Northern America	Chisholm View wind farm	1			235	operating	2012		onshore						Enel Green Power		36.5851	-97.7678	exact		Garfield County		Oklahoma	https://gem.wiki/Chisholm_View_wind_farm	L906775	G910098	IT0003128367	1	300		12	2052	2092	2132	235	235	235	235	235	235	235	235	235	235	235	235
wind	United States	Americas	Northern America	Chisholm View wind farm	2			65	operating	2016		onshore						Enel Green Power		36.5255	-97.6952	exact		Garfield County		Oklahoma	https://gem.wiki/Chisholm_View_wind_farm	L906775	G909121	IT0003128367	1	300	300	8	2056	2096	2136	65	65	65	65	65	65	65	65	65	65	65	65
wind	Greece	Europe	Southern Europe	Chlogos wind farm		Χλογος		19	operating	2012		onshore						Enel Green Power Greece SA		37.7608	22.8552	exact	Municipal Unit of Tenea	Corinthia Regional Unit	Peloponnese Region	Peloponnese, Western Greece and the Ionian	https://gem.wiki/Chlogos_wind_farm	L911347	G914314	IT0003128367	1	19	19	12	2052	2092	2132	19	19	19	19	19	19	19	19	19	19	19	19
wind	United States	Americas	Northern America	Cimarron Bend wind farm	1			200	operating	2016		onshore						Enel Green Power		37.3767	-99.9265	exact		Clark County		Kansas	https://gem.wiki/Cimarron_Bend_wind_farm	L907339	G909918	IT0003128367	1	599		8	2056	2096	2136	200	200	200	200	200	200	200	200	200	200	200	200
wind	United States	Americas	Northern America	Cimarron Bend wind farm	2			200	operating	2017		onshore						Enel Green Power		37.3771	-99.9468	exact		Clark County		Kansas	https://gem.wiki/Cimarron_Bend_wind_farm	L907339	G909919	IT0003128367	1	599		7	2057	2097	2137	200	200	200	200	200	200	200	200	200	200	200	200
wind	United States	Americas	Northern America	Cimarron Bend wind farm	3			199	operating	2020		onshore						Enel Green Power		37.4144	-100.044	exact		Clark County		Kansas	https://gem.wiki/Cimarron_Bend_wind_farm	L907339	G909885	IT0003128367	1	599	599	4	2060	2100	2140	199	199	199	199	199	199	199	199	199	199	199	199
wind	Spain	Europe	Southern Europe	Cobertran wind farm				50	pre-construction			onshore						Enel Green Power España		41.525	1.0891	approximate	Vallbona de les Monges	Urgell		Cataluña	https://gem.wiki/Cobertran_wind_farm	L914892	G918436	IT0003128367	1	50		-99	40	80	120	0	0	0	0	0	0	0	0	0	0	0	0
wind	Spain	Europe	Southern Europe	Cogollos wind farm	2			50	operating	2011		onshore						Enel Green Power España		42.2007	-3.6994	approximate	Cogollos		Burgos	Castilla y León	https://gem.wiki/Cogollos_wind_farm	L914894	G918438	IT0003128367	1	50		13	2051	2091	2131	50	50	50	50	50	50	50	50	50	50	50	50
wind	Spain	Europe	Southern Europe	Coll De Traginers wind farm				50	pre-construction			onshore						Enel Green Power España		41.5005	1.0755	approximate	els Omells de na Gaia	Urgell		Cataluña	https://gem.wiki/Coll_De_Traginers_wind_farm	L914896	G918440	IT0003128367	1	50	50	-99	40	80	120	0	0	0	0	0	0	0	0	0	0	0	0
wind	Spain	Europe	Southern Europe	Coriscada wind farm				24	operating	2000		onshore						Enel Green Power España		43.7138	-7.7209	exact		Ortegal		Galicia	https://gem.wiki/Coriscada_wind_farm	L912365	G915465	IT0003128367	1	24	24	24	2040	2080	2120	24	24	24	24	24	24	24	24	24	24	24	24
wind	Romania	Europe	Eastern Europe	Corugea wind farm	1		Corugea - Cismeaua Noua	70	operating	2011		onshore						Enel SPA		45.9852	24.6859	approximate	Corugea	Tulcea		Northern Dobruja	https://gem.wiki/Corugea_wind_farm	L915416	G919067	IT0003128367	1	70	70	13	2051	2091	2131	70	70	70	70	70	70	70	70	70	70	70	70
wind	Spain	Europe	Southern Europe	Corzán wind farm				43	operating	2007		onshore						Enel Green Power España		42.9226	-8.8479	exact		A Barcala		Galicia	https://gem.wiki/Corzán_wind_farm	L914422	G917872	IT0003128367	1	43	43	17	2047	2087	2127	43	43	43	43	43	43	43	43	43	43	43	43
wind	Spain	Europe	Southern Europe	Coto Teixido wind farm	1			23	operating	2002		onshore						Enel Green Power España		43.5201	-7.7301	exact		Terra Chá		Galicia	https://gem.wiki/Coto_Teixido_wind_farm	L912202	G915284	IT0003128367	1	23		22	2042	2082	2122	23	23	23	23	23	23	23	23	23	23	23	23
wind	Spain	Europe	Southern Europe	Coucepenido wind farm				23	operating	1999		onshore						Enel Green Power España		43.7201	-7.9401	exact		Ferrol		Galicia	https://gem.wiki/Coucepenido_wind_farm	L912203	G915285	IT0003128367	1	23	23	25	2039	2079	2119	23	23	23	23	23	23	23	23	23	23	23	23
wind	Spain	Europe	Southern Europe	Couto De San Sebastian wind farm				18	operating	2007		onshore						Enel Green Power España		42.696	-8.2465	exact		O Deza		Galicia	https://gem.wiki/Couto_De_San_Sebastian_wind_farm	L911022	G913949	IT0003128367	1	18	18	17	2047	2087	2127	18	18	18	18	18	18	18	18	18	18	18	18
wind	United States	Americas	Northern America	Cow Creek Wind Project	1			700	pre-construction			onshore						Enel Green Power		38.8199	-102.346	approximate	Burlington	Cheyenne County		Colorado	https://gem.wiki/Cow_Creek_Wind_Project	L907679	G910335	IT0003128367	1	700	700	-99	40	80	120	0	0	0	0	0	0	0	0	0	0	0	0
wind	Brazil	Americas	Latin America and the Caribbean	Cristal wind farm	Cristal	Complexo Eólico Cristal		30	operating	2017		onshore						Enel Green Power Brasil Participações LTDA		-11.7965	-41.3934	exact	Cafarnaum		Região Geográfica Intermediária de Irecê	Bahia	https://gem.wiki/Cristal_wind_farm	L905193	G906757	IT0003128367	1	90		7	2057	2097	2137	30	30	30	30	30	30	30	30	30	30	30	30
wind	Brazil	Americas	Latin America and the Caribbean	Cristal wind farm	Primavera	Complexo Eólico Cristal		30	operating	2017		onshore						Enel Green Power Brasil Participações LTDA		-11.7334	-41.373	exact	Morro do Chapéu		Região Geográfica Intermediária de Irecê	Bahia	https://gem.wiki/Cristal_wind_farm	L905193	G906758	IT0003128367	1	90		7	2057	2097	2137	30	30	30	30	30	30	30	30	30	30	30	30
wind	Brazil	Americas	Latin America and the Caribbean	Cristal wind farm	São Judas	Complexo Eólico Cristal		30	operating	2017		onshore						Enel Green Power Brasil Participações LTDA		-11.6643	-41.362	exact	Morro do Chapéu		Região Geográfica Intermediária de Irecê	Bahia	https://gem.wiki/Cristal_wind_farm	L905193	G906759	IT0003128367	1	90	90	7	2057	2097	2137	30	30	30	30	30	30	30	30	30	30	30	30
wind	Spain	Europe	Southern Europe	Cronos wind farm				20	pre-construction			onshore						Enel Green Power España		42.3733	2.9206	approximate	Capmany	Alt Emporda		Cataluña	https://gem.wiki/Cronos_wind_farm	L911519	G914506	IT0003128367	1	20	20	-99	40	80	120	0	0	0	0	0	0	0	0	0	0	0	0
wind	Brazil	Americas	Latin America and the Caribbean	Cumaru wind farm	1	Complexo Eólico Cumaru		42	operating	2021		onshore						Enel Green Power Brasil Participações LTDA		-5.1526	-35.7646	exact	São Miguel do Gostoso		Região Geográfica Intermediária de Natal	Rio Grande do Norte	https://gem.wiki/Cumaru_wind_farm	L905194	G906760	IT0003128367	1	206		3	2061	2101	2141	0	42	42	42	42	42	42	42	42	42	42	42
wind	Brazil	Americas	Latin America and the Caribbean	Cumaru wind farm	2	Complexo Eólico Cumaru		42	operating	2021		onshore						Enel Green Power Brasil Participações LTDA		-5.1813	-35.7806	exact	São Miguel do Gostoso		Região Geográfica Intermediária de Natal	Rio Grande do Norte	https://gem.wiki/Cumaru_wind_farm	L905194	G906761	IT0003128367	1	206		3	2061	2101	2141	0	42	42	42	42	42	42	42	42	42	42	42
wind	Brazil	Americas	Latin America and the Caribbean	Cumaru wind farm	3	Complexo Eólico Cumaru		42	operating	2021		onshore						Enel Green Power Brasil Participações LTDA		-5.1319	-35.8098	exact	Pedra Grande		Região Geográfica Intermediária de Natal	Rio Grande do Norte	https://gem.wiki/Cumaru_wind_farm	L905194	G906762	IT0003128367	1	206		3	2061	2101	2141	0	42	42	42	42	42	42	42	42	42	42	42
wind	Brazil	Americas	Latin America and the Caribbean	Cumaru wind farm	4	Complexo Eólico Cumaru		42	operating	2021		onshore						Enel Green Power Brasil Participações LTDA		-5.1601	-35.7833	exact	São Miguel do Gostoso		Região Geográfica Intermediária de Natal	Rio Grande do Norte	https://gem.wiki/Cumaru_wind_farm	L905194	G906763	IT0003128367	1	206		3	2061	2101	2141	0	42	42	42	42	42	42	42	42	42	42	42
wind	Brazil	Americas	Latin America and the Caribbean	Cumaru wind farm	5	Complexo Eólico Cumaru		38	operating	2021		onshore						Enel Green Power Brasil Participações LTDA		-5.1458	-35.7989	exact	São Miguel do Gostoso		Região Geográfica Intermediária de Natal	Rio Grande do Norte	https://gem.wiki/Cumaru_wind_farm	L905194	G906764	IT0003128367	1	206	206	3	2061	2101	2141	0	38	38	38	38	38	38	38	38	38	38	38
wind	Brazil	Americas	Latin America and the Caribbean	Curva Dos Ventos wind farm	Emiliana	Complexo Eólico Curva dos Ventos		28	operating	2014		onshore						Enel Green Power Brasil Participações LTDA		-13.9101	-42.6241	exact	Igaporã		Região Geográfica Intermediária de Guanambi	Bahia	https://gem.wiki/Curva_Dos_Ventos_wind_farm	L905195	G906765	IT0003128367	1	56		10	2054	2094	2134	28	28	28	28	28	28	28	28	28	28	28	28
wind	Brazil	Americas	Latin America and the Caribbean	Curva Dos Ventos wind farm	Joana	Complexo Eólico Curva dos Ventos		28	operating	2014		onshore						Enel Green Power Brasil Participações LTDA		-13.9185	-42.6205	exact	Igaporã		Região Geográfica Intermediária de Guanambi	Bahia	https://gem.wiki/Curva_Dos_Ventos_wind_farm	L905195	G906766	IT0003128367	1	56	56	10	2054	2094	2134	28	28	28	28	28	28	28	28	28	28	28	28
wind	Brazil	Americas	Latin America and the Caribbean	Delfina wind farm	1	Parque Eólico Delfina		28	operating	2017		onshore						Enel Green Power Brasil Participações LTDA		-10.0575	-40.9787	exact	Campo Formoso		Região Geográfica Intermediária de Juazeiro	Bahia	https://gem.wiki/Delfina_wind_farm	L905196	G906767	IT0003128367	1	201		7	2057	2097	2137	28	28	28	28	28	28	28	28	28	28	28	28
wind	Brazil	Americas	Latin America and the Caribbean	Delfina wind farm	2	Parque Eólico Delfina		28	operating	2017		onshore						Enel Green Power Brasil Participações LTDA		-10.0369	-40.9586	exact	Campo Formoso		Região Geográfica Intermediária de Juazeiro	Bahia	https://gem.wiki/Delfina_wind_farm	L905196	G906768	IT0003128367	1	201		7	2057	2097	2137	28	28	28	28	28	28	28	28	28	28	28	28
wind	Brazil	Americas	Latin America and the Caribbean	Delfina wind farm	3	Parque Eólico Delfina		28	operating	2017		onshore						Enel Green Power Brasil Participações LTDA		-10.0044	-40.9342	exact	Campo Formoso		Região Geográfica Intermediária de Juazeiro	Bahia	https://gem.wiki/Delfina_wind_farm	L905196	G906769	IT0003128367	1	201		7	2057	2097	2137	28	28	28	28	28	28	28	28	28	28	28	28
wind	Brazil	Americas	Latin America and the Caribbean	Delfina wind farm	5	Parque Eólico Delfina		28	operating	2017		onshore						Enel Green Power Brasil Participações LTDA		-10.0229	-40.9284	exact	Campo Formoso		Região Geográfica Intermediária de Juazeiro	Bahia	https://gem.wiki/Delfina_wind_farm	L905196	G906770	IT0003128367	1	201		7	2057	2097	2137	28	28	28	28	28	28	28	28	28	28	28	28
wind	Brazil	Americas	Latin America and the Caribbean	Delfina wind farm	6	Parque Eólico Delfina		30	operating	2017		onshore						Enel Green Power Brasil Participações LTDA		-10.0286	-40.9526	exact	Campo Formoso		Região Geográfica Intermediária de Juazeiro	Bahia	https://gem.wiki/Delfina_wind_farm	L905196	G906771	IT0003128367	1	201		7	2057	2097	2137	30	30	30	30	30	30	30	30	30	30	30	30
wind	Brazil	Americas	Latin America and the Caribbean	Delfina wind farm	7	Parque Eólico Delfina		30	operating	2017		onshore						Enel Green Power Brasil Participações LTDA		-9.986	-40.9111	exact	Campo Formoso		Região Geográfica Intermediária de Juazeiro	Bahia	https://gem.wiki/Delfina_wind_farm	L905196	G906772	IT0003128367	1	201		7	2057	2097	2137	30	30	30	30	30	30	30	30	30	30	30	30
wind	Brazil	Americas	Latin America and the Caribbean	Delfina wind farm	8 (Zeus 2)	Parque Eólico Delfina		29	operating	2019		onshore						Enel Green Power Brasil Participações LTDA		-9.9698	-40.8816	exact	Campo Formoso		Região Geográfica Intermediária de Juazeiro	Bahia	https://gem.wiki/Delfina_wind_farm	L905196	G906773	IT0003128367	1	201	201	5	2059	2099	2139	29	29	29	29	29	29	29	29	29	29	29	29
wind	United States	Americas	Northern America	Diamond Vista wind farm	1		Diamond Vista Wind Project LLC	299	operating	2018		onshore						Enel Green Power		38.5549	-97.2521	exact		Marion County		Kansas	https://gem.wiki/Diamond_Vista_wind_farm	L907558	G910194	IT0003128367	1	299	299	6	2058	2098	2138	299	299	299	299	299	299	299	299	299	299	299	299
wind	Spain	Europe	Southern Europe	Do Vilan wind farm			Cabo Vilan	16.9	operating			onshore						Enel Green Power		43.153	-9.2045	exact					https://gem.wiki/Do_Vilan_wind_farm	L920741	G925556	IT0003128367	1	16.9	16.9	-99	40	80	120	16.9	16.9	16.9	16.9	16.9	16.9	16.9	16.9	16.9	16.9	16.9	16.9
wind	Spain	Europe	Southern Europe	Do Vilán wind farm				17	operating	2003		onshore						Enel Green Power España		43.1492	-9.1899	exact		Terra de Soneira		Galicia	https://gem.wiki/Do_Vilán_wind_farm	L910806	G913704	IT0003128367	1	17	17	21	2043	2083	2123	17	17	17	17	17	17	17	17	17	17	17	17
wind	Mexico	Americas	Latin America and the Caribbean	Dolores wind farm		Parque Eólico Dolores	Dolores China	244	operating	2021		onshore						Enel Green Power SPA		25.5466	-98.6054	approximate		China		Nuevo Leon	https://gem.wiki/Dolores_wind_farm	L905221	G906851	IT0003128367	1	244	244	3	2061	2101	2141	0	244	244	244	244	244	244	244	244	244	244	244
wind	Mexico	Americas	Latin America and the Caribbean	Dominica wind farm	1	Parque Eólico Dominica		100	operating	2014		onshore						Enel Green Power SPA		23.3352	-101.333	exact	Charcas			San Luis Potosi	https://gem.wiki/Dominica_wind_farm	L905222	G906852	IT0003128367	1	200		10	2054	2094	2134	100	100	100	100	100	100	100	100	100	100	100	100
wind	Mexico	Americas	Latin America and the Caribbean	Dominica wind farm	2	Parque Eólico Dominica		100	operating	2015		onshore						Enel Green Power SPA		23.3352	-101.333	approximate	Charcas		Charcas	San Luis Potosi	https://gem.wiki/Dominica_wind_farm	L905222	G906853	IT0003128367	1	200	200	9	2055	2095	2135	100	100	100	100	100	100	100	100	100	100	100	100
wind	United States	Americas	Northern America	Drift Sand wind farm	1			108	operating	2016		onshore						Enel Green Power		34.8362	-97.9705	exact		Grady County		Oklahoma	https://gem.wiki/Drift_Sand_wind_farm	L907067	G909511	IT0003128367	1	108	108	8	2056	2096	2136	108	108	108	108	108	108	108	108	108	108	108	108
wind	Greece	Europe	Southern Europe	Dytikos Ktenias wind farm		Δυτικος Κτενιας		34.5	pre-construction			onshore						Enel Green Power Greece SA		37.5659	22.4963	exact		Arcadia Regional Unit	Peloponnese Region	Peloponnese, Western Greece and the Ionian	https://gem.wiki/Dytikos_Ktenias_wind_farm	L913747	G917084	IT0003128367	1	34.5	34.5	-99	40	80	120	0	0	0	0	0	0	0	0	0	0	0	0
wind	Spain	Europe	Southern Europe	EEE repotenciado wind farm	2-3			32	operating	2008		onshore						Enel Green Power España		36.0128	-5.6049	approximate	Tarifa		Cádiz	Andalucía	https://gem.wiki/EEE_repotenciado_wind_farm	L913501	G916788	IT0003128367	1	32	32	16	2048	2088	2128	32	32	32	32	32	32	32	32	32	32	32	32
[truncated: 261 more rows]
[truncated: 19 more columns]

## Sheet: Enel_TP
Type	Country/area	Region	Subregion	Plant / Project name	Unit / Phase name	Plant / Project name (local)	Plant / Project name (other)	Capacity (MW)	Status	Start year	Retired year	Technology	Fuel	Country/area 1 (hydropower only)	Country/area 2 (hydropower only)	Country/area 1 Capacity (MW) (hydropower only)	Country/area 2 Capacity (MW) (hydropower only)	Owner	Parent	Latitude	Longitude	Location accuracy	City	Local area (taluk, county)	Major area (prefecture, district)	Subnational unit (state, province)	GEM.Wiki URL	GEM location ID	GEM unit/phase ID	CompISIN	Ownership	Plant capacity	Plant capacity	Age	Reinvestment year	Reinvestment year	Reinvestment year	2020	2021	2022	2023	2024	2025	2026	2027	2028	2029	2030	2031
[truncated: 695 more rows]
[truncated: 19 more columns]

[truncated: 1 more sheets: Enel_Fossilfuel]
