# Supplementary material for: Assessing corporate transition plans using a production asset-based planning approach
Source: Research Square preprint supplement (doi:10.21203/rs.3.rs-5245457/v1), 2024-12-09
Supplement: Supplementary file 15 [file 3 KEPCO.xlsx]

## Sheet: KEPCO_all
Type	Country/area	Region	Subregion	Plant / Project name	Unit / Phase name	Plant / Project name (local)	Plant / Project name (other)	Capacity (MW)	Status	Start year	Retired year	Technology	Fuel	Country/area 1 (hydropower only)	Country/area 2 (hydropower only)	Country/area 1 Capacity (MW) (hydropower only)	Country/area 2 Capacity (MW) (hydropower only)	Owner	Parent	Latitude	Longitude	Location accuracy	City	Local area (taluk, county)	Major area (prefecture, district)	Subnational unit (state, province)	GEM.Wiki URL	GEM location ID	GEM unit/phase ID	CompISIN	Ownership	Plant capacity	Plant capacity	Age	Reinvestment year	Reinvestment year	Reinvestment year
coal	South Korea	Asia	Eastern Asia	Anin power station	Unit 1	강릉 안인	Gnagneung, Gangnung Anin, Gangreung Anin, 강릉 안인	1040	operating	2022	2052	ultra-supercritical	unknown					Gangneung Eco Power [100%]	other unknown/mixed entity types [42.0%]; Korea Electric Power Corp [29.0%]; Samsung C&T Corp [29.0%]	37.7332	128.979	exact	Gangneung			Gangwon	https://www.gem.wiki/Anin_power_station	L100000103457	G100000100246	KR7015760002	0.29	2080		2	2062	2102	2142
coal	South Korea	Asia	Eastern Asia	Anin power station	Unit 2	강릉 안인	Gnagneung, Gangnung Anin, Gangreung Anin, 강릉 안인	1040	operating	2023	2052	ultra-supercritical	unknown					Gangneung Eco Power [100%]	other unknown/mixed entity types [42.0%]; Korea Electric Power Corp [29.0%]; Samsung C&T Corp [29.0%]	37.7332	128.979	exact	Gangneung			Gangwon	https://www.gem.wiki/Anin_power_station	L100000103457	G100000100247	KR7015760002	0.29	2080	2080	1	2063	2103	2143
coal	South Korea	Asia	Eastern Asia	Boryeong power station	Unit 1	보령 발전소	Poryong power station, 보령 발전소	500	retired	1983	2020	subcritical	bituminous					Korea Midland Power [100%]	Korea Electric Power Corp [100.0%]	36.4009	126.491	exact	Poryong-gun	Ocheon	Poryong	South Chungcheong	https://www.gem.wiki/Boryeong_power_station	L100000103477	G100000109268	KR7015760002	1	6400		41	2023	2063	2103
coal	South Korea	Asia	Eastern Asia	Boryeong power station	Unit 2	보령 발전소	Poryong power station, 보령 발전소	500	retired	1984	2020	subcritical	bituminous					Korea Midland Power [100%]	Korea Electric Power Corp [100.0%]	36.4009	126.491	exact	Poryong-gun	Ocheon	Poryong	South Chungcheong	https://www.gem.wiki/Boryeong_power_station	L100000103477	G100000109270	KR7015760002	1	6400		40	2024	2064	2104
coal	South Korea	Asia	Eastern Asia	Boryeong power station	Unit 5	보령 발전소	Poryong power station, 보령 발전소	500	operating	1993	2026	supercritical	bituminous					Korea Midland Power [100%]	Korea Electric Power Corp [100.0%]	36.4009	126.491	exact	Poryong-gun	Ocheon	Poryong	South Chungcheong	https://www.gem.wiki/Boryeong_power_station	L100000103477	G100000109273	KR7015760002	1	6400		31	2033	2073	2113
coal	South Korea	Asia	Eastern Asia	Boryeong power station	Unit 3	보령 발전소	Poryong power station, 보령 발전소	550	operating	1993	2043	supercritical	bituminous					Korea Midland Power [100%]	Korea Electric Power Corp [100.0%]	36.4009	126.491	exact	Poryong-gun	Ocheon	Poryong	South Chungcheong	https://www.gem.wiki/Boryeong_power_station	L100000103477	G100000109271	KR7015760002	1	6400		31	2033	2073	2113
coal	South Korea	Asia	Eastern Asia	Boryeong power station	Unit 4	보령 발전소	Poryong power station, 보령 발전소	500	operating	1993	2043	supercritical	bituminous					Korea Midland Power [100%]	Korea Electric Power Corp [100.0%]	36.4009	126.491	exact	Poryong-gun	Ocheon	Poryong	South Chungcheong	https://www.gem.wiki/Boryeong_power_station	L100000103477	G100000109272	KR7015760002	1	6400		31	2033	2073	2113
coal	South Korea	Asia	Eastern Asia	Boryeong power station	Unit 6	보령 발전소	Poryong power station, 보령 발전소	500	operating	1994	2026	supercritical	bituminous					Korea Midland Power [100%]	Korea Electric Power Corp [100.0%]	36.4009	126.491	exact	Poryong-gun	Ocheon	Poryong	South Chungcheong	https://www.gem.wiki/Boryeong_power_station	L100000103477	G100000109274	KR7015760002	1	6400		30	2034	2074	2114
coal	South Korea	Asia	Eastern Asia	Boryeong power station	Unit 7	보령 발전소	Poryong power station, 보령 발전소	500	operating	2008	2038	ultra-supercritical	bituminous					Korea Midland Power [100%]	Korea Electric Power Corp [100.0%]	36.4009	126.491	exact	Poryong-gun	Ocheon	Poryong	South Chungcheong	https://www.gem.wiki/Boryeong_power_station	L100000103477	G100000109275	KR7015760002	1	6400		16	2048	2088	2128
coal	South Korea	Asia	Eastern Asia	Boryeong power station	Unit 8	보령 발전소	Poryong power station, 보령 발전소	500	operating	2008	2038	ultra-supercritical	bituminous					Korea Midland Power [100%]	Korea Electric Power Corp [100.0%]	36.4009	126.491	exact	Poryong-gun	Ocheon	Poryong	South Chungcheong	https://www.gem.wiki/Boryeong_power_station	L100000103477	G100000109276	KR7015760002	1	6400	6400	16	2048	2088	2128
coal	South Korea	Asia	Eastern Asia	Bukpyung power station	Unit 1	북평화력	Buk-Pyeong power station; GS Donghae power station, 북평화력	595	operating	2017	2047	supercritical	anthracite					ST International; Korea East-West Power	Korea Electric Power Corp; ST International	37.4805	129.143	exact	Donghae			Gangwon	https://www.gem.wiki/Bukpyung_power_station	L100000103458	G100000101094	KR7015760002	0.5	1190		7	2057	2097	2137
coal	South Korea	Asia	Eastern Asia	Bukpyung power station	Unit 2	북평화력	Buk-Pyeong power station; GS Donghae power station, 북평화력	595	operating	2017	2047	supercritical	anthracite					ST International; Korea East-West Power	Korea Electric Power Corp; ST International	37.4805	129.143	exact	Donghae			Gangwon	https://www.gem.wiki/Bukpyung_power_station	L100000103458	G100000101095	KR7015760002	0.5	1190	1190	7	2057	2097	2137
coal	Vietnam	Asia	South-eastern Asia	Can Duoc power station (KEPCO and Vinakobalt)	--			1600	cancelled			unknown	unknown					Korea Electric Power; Long An Vinakobalt	Korea Electric Power; Long An Vinakobalt	10.5392	106.609	approximate			Can Duoc	Long An	https://www.gem.wiki/Can_Duoc_power_station_(KEPCO_and_Vinakobalt)	L100000104321	G100000101180	KR7015760002	0.5	1600	1600	-99	40	80	120
coal	Indonesia	Asia	South-eastern Asia	Cirebon power station	Unit 1		井里汶电站	660	operating	2012	2037	supercritical	unknown					PT Cirebon Electric Power [100%]	Marubeni Corp [32.5%]; Korea Electric Power Corp [27.5%]; PT Indika Energy Tbk [20.0%]; ST International Corp [20.0%]	-6.77029	108.615	exact	Kanci Kulon	Astanajapura	Cirebon	West Java	https://www.gem.wiki/Cirebon_power_station	L100000102814	G100000101590	KR7015760002	0.275	2584		12	2052	2092	2132
coal	Indonesia	Asia	South-eastern Asia	Cirebon power station	Unit 2		井里汶电站	924	operating	2023		ultra-supercritical	unknown					PT Cirebon Electric Power [100%]	Marubeni Corp [32.5%]; Korea Electric Power Corp [27.5%]; PT Indika Energy Tbk [20.0%]; ST International Corp [20.0%]	-6.77029	108.615	exact	Kanci Kulon	Astanajapura	Cirebon	West Java	https://www.gem.wiki/Cirebon_power_station	L100000102814	G100000101591	KR7015760002	0.275	2584		1	2063	2103	2143
coal	Indonesia	Asia	South-eastern Asia	Cirebon power station	Unit 3		井里汶电站	1000	cancelled			ultra-supercritical	unknown					PT Cirebon Electric Power [100%]	Marubeni Corp [32.5%]; Korea Electric Power Corp [27.5%]; PT Indika Energy Tbk [20.0%]; ST International Corp [20.0%]	-6.77029	108.615	exact	Kanci Kulon	Astanajapura	Cirebon	West Java	https://www.gem.wiki/Cirebon_power_station	L100000102814	G100000112733	KR7015760002	0.275	2584	2584	-99	40	80	120
coal	South Korea	Asia	Eastern Asia	Dangjin power station	Unit 1	당진 발전소	당진 발전소	500	operating	1999	2029	supercritical	bituminous					Korea East-West Power [100%]	Korea Electric Power Corp [100.0%]	37.0551	126.512	exact	Gyoro	Seokmun	Dangjin	South Chungcheong	https://www.gem.wiki/Dangjin_power_station	L100000103480	G100000101952	KR7015760002	1	6040		25	2039	2079	2119
coal	South Korea	Asia	Eastern Asia	Dangjin power station	Unit 2	당진 발전소	당진 발전소	500	operating	1999	2029	supercritical	bituminous					Korea East-West Power [100%]	Korea Electric Power Corp [100.0%]	37.0551	126.512	exact	Gyoro	Seokmun	Dangjin	South Chungcheong	https://www.gem.wiki/Dangjin_power_station	L100000103480	G100000101954	KR7015760002	1	6040		25	2039	2079	2119
coal	South Korea	Asia	Eastern Asia	Dangjin power station	Unit 3	당진 발전소	당진 발전소	500	operating	2000	2030	supercritical	bituminous					Korea East-West Power [100%]	Korea Electric Power Corp [100.0%]	37.0551	126.512	exact	Gyoro	Seokmun	Dangjin	South Chungcheong	https://www.gem.wiki/Dangjin_power_station	L100000103480	G100000101955	KR7015760002	1	6040		24	2040	2080	2120
coal	South Korea	Asia	Eastern Asia	Dangjin power station	Unit 4	당진 발전소	당진 발전소	500	operating	2001	2030	supercritical	bituminous					Korea East-West Power [100%]	Korea Electric Power Corp [100.0%]	37.0551	126.512	exact	Gyoro	Seokmun	Dangjin	South Chungcheong	https://www.gem.wiki/Dangjin_power_station	L100000103480	G100000101956	KR7015760002	1	6040		23	2041	2081	2121
coal	South Korea	Asia	Eastern Asia	Dangjin power station	Unit 5	당진 발전소	당진 발전소	500	operating	2005	2035	ultra-supercritical	bituminous					Korea East-West Power [100%]	Korea Electric Power Corp [100.0%]	37.0551	126.512	exact	Gyoro	Seokmun	Dangjin	South Chungcheong	https://www.gem.wiki/Dangjin_power_station	L100000103480	G100000101957	KR7015760002	1	6040		19	2045	2085	2125
coal	South Korea	Asia	Eastern Asia	Dangjin power station	Unit 6	당진 발전소	당진 발전소	500	operating	2006	2036	ultra-supercritical	bituminous					Korea East-West Power [100%]	Korea Electric Power Corp [100.0%]	37.0551	126.512	exact	Gyoro	Seokmun	Dangjin	South Chungcheong	https://www.gem.wiki/Dangjin_power_station	L100000103480	G100000101958	KR7015760002	1	6040		18	2046	2086	2126
coal	South Korea	Asia	Eastern Asia	Dangjin power station	Unit 7	당진 발전소	당진 발전소	500	operating	2007	2037	ultra-supercritical	bituminous					Korea East-West Power [100%]	Korea Electric Power Corp [100.0%]	37.0551	126.512	exact	Gyoro	Seokmun	Dangjin	South Chungcheong	https://www.gem.wiki/Dangjin_power_station	L100000103480	G100000101959	KR7015760002	1	6040		17	2047	2087	2127
coal	South Korea	Asia	Eastern Asia	Dangjin power station	Unit 8	당진 발전소	당진 발전소	500	operating	2007	2037	ultra-supercritical	bituminous					Korea East-West Power [100%]	Korea Electric Power Corp [100.0%]	37.0551	126.512	exact	Gyoro	Seokmun	Dangjin	South Chungcheong	https://www.gem.wiki/Dangjin_power_station	L100000103480	G100000101960	KR7015760002	1	6040		17	2047	2087	2127
coal	South Korea	Asia	Eastern Asia	Dangjin power station	Unit 9	당진 발전소	당진 발전소	1020	operating	2016	2045	ultra-supercritical	bituminous					Korea East-West Power [100%]	Korea Electric Power Corp [100.0%]	37.0551	126.512	exact	Dangjin			South Chungcheong	https://www.gem.wiki/Dangjin_power_station	L100000103480	G100000101961	KR7015760002	1	6040		8	2056	2096	2136
coal	South Korea	Asia	Eastern Asia	Dangjin power station	Unit 10	당진 발전소	당진 발전소	1020	operating	2016	2046	ultra-supercritical	bituminous					Korea East-West Power [100%]	Korea Electric Power Corp [100.0%]	37.0551	126.512	exact	Gyoro	Seokmun	Dangjin	South Chungcheong	https://www.gem.wiki/Dangjin_power_station	L100000103480	G100000101953	KR7015760002	1	6040	6040	8	2056	2096	2136
coal	South Korea	Asia	Eastern Asia	Donghae power station	Unit 1	동해 발전소	East Sea power station, 동해 발전소	200	operating	1998	2028	subcritical	anthracite					Korea East-West Power [100%]	Korea Electric Power Corp [100.0%]	37.4863	129.147	exact	Donghae		Donghae	Gangwon	https://www.gem.wiki/Donghae_power_station	L100000103460	G100000102425	KR7015760002	1	400		26	2038	2078	2118
coal	South Korea	Asia	Eastern Asia	Donghae power station	Unit 2	동해 발전소	East Sea power station, 동해 발전소	200	operating	1999	2029	subcritical	anthracite					Korea East-West Power [100%]	Korea Electric Power Corp [100.0%]	37.4863	129.147	exact	Donghae		Donghae	Gangwon	https://www.gem.wiki/Donghae_power_station	L100000103460	G100000102426	KR7015760002	1	400	400	25	2039	2079	2119
coal	South Korea	Asia	Eastern Asia	Goseong Green power station	Unit 1	고성그린파워	Goseong Hi, Goseung Hai, Goseong High, 고성그린파워	1040	operating	2021	2051	ultra-supercritical	unknown					Goseong Green Power [100%]	other unknown/mixed entity types [52.0%]; Korea Electric Power Corp [29.0%]; SK Gas Co Ltd [19.0%]	34.9049	128.125	exact	Hai-myeon	Geumseong	Hadong	South Gyeongsang	https://www.gem.wiki/Goseong_Green_power_station	L100000103484	G100000103106	KR7015760002	0.29	2080		3	2061	2101	2141
coal	South Korea	Asia	Eastern Asia	Goseong Green power station	Unit 2	고성그린파워	Goseong Hi, Goseung Hai, Goseong High, 고성그린파워	1040	operating	2021	2051	ultra-supercritical	unknown					Goseong Green Power [100%]	other unknown/mixed entity types [52.0%]; Korea Electric Power Corp [29.0%]; SK Gas Co Ltd [19.0%]	34.9049	128.125	exact	Hai-myeon	Geumseong	Hadong	South Gyeongsang	https://www.gem.wiki/Goseong_Green_power_station	L100000103484	G100000103107	KR7015760002	0.29	2080	2080	3	2061	2101	2141
coal	South Korea	Asia	Eastern Asia	Hadong power station	Unit 1	하동 발전소	하동 발전소	500	operating	1997	2026	supercritical	bituminous					Korea Southern Power [100%]	Korea Electric Power Corp [100.0%]	34.9524	127.82	exact	Gadeok	Geumseong	Hadong	South Gyeongsang	https://www.gem.wiki/Hadong_power_station	L100000103485	G100000103526	KR7015760002	1	7000		27	2037	2077	2117
coal	South Korea	Asia	Eastern Asia	Hadong power station	Unit 2	하동 발전소	하동 발전소	500	operating	1997	2027	supercritical	bituminous					Korea Southern Power [100%]	Korea Electric Power Corp [100.0%]	34.9524	127.82	exact	Gadeok	Geumseong	Hadong	South Gyeongsang	https://www.gem.wiki/Hadong_power_station	L100000103485	G100000103527	KR7015760002	1	7000		27	2037	2077	2117
coal	South Korea	Asia	Eastern Asia	Hadong power station	Unit 3	하동 발전소	하동 발전소	500	operating	1998	2028	supercritical	bituminous					Korea Southern Power [100%]	Korea Electric Power Corp [100.0%]	34.9524	127.82	exact	Gadeok	Geumseong	Hadong	South Gyeongsang	https://www.gem.wiki/Hadong_power_station	L100000103485	G100000103528	KR7015760002	1	7000		26	2038	2078	2118
coal	South Korea	Asia	Eastern Asia	Hadong power station	Unit 4	하동 발전소	하동 발전소	500	operating	1999	2028	supercritical	bituminous					Korea Southern Power [100%]	Korea Electric Power Corp [100.0%]	34.9524	127.82	exact	Gadeok	Geumseong	Hadong	South Gyeongsang	https://www.gem.wiki/Hadong_power_station	L100000103485	G100000103529	KR7015760002	1	7000		25	2039	2079	2119
coal	South Korea	Asia	Eastern Asia	Hadong power station	Unit 5	하동 발전소	하동 발전소	500	operating	2000	2031	supercritical	bituminous					Korea Southern Power [100%]	Korea Electric Power Corp [100.0%]	34.9524	127.82	exact	Gadeok	Geumseong	Hadong	South Gyeongsang	https://www.gem.wiki/Hadong_power_station	L100000103485	G100000103530	KR7015760002	1	7000		24	2040	2080	2120
coal	South Korea	Asia	Eastern Asia	Hadong power station	Unit 6	하동 발전소	하동 발전소	500	operating	2001	2031	supercritical	bituminous					Korea Southern Power [100%]	Korea Electric Power Corp [100.0%]	34.9524	127.82	exact	Gadeok	Geumseong	Hadong	South Gyeongsang	https://www.gem.wiki/Hadong_power_station	L100000103485	G100000103531	KR7015760002	1	7000		23	2041	2081	2121
coal	South Korea	Asia	Eastern Asia	Hadong power station	Unit 7	하동 발전소	하동 발전소	500	operating	2008	2038	ultra-supercritical	bituminous					Korea Southern Power [100%]	Korea Electric Power Corp [100.0%]	34.9524	127.82	exact	Gadeok	Geumseong	Hadong	South Gyeongsang	https://www.gem.wiki/Hadong_power_station	L100000103485	G100000103532	KR7015760002	1	7000		16	2048	2088	2128
coal	South Korea	Asia	Eastern Asia	Hadong power station	Unit 8	하동 발전소	하동 발전소	500	operating	2009	2039	ultra-supercritical	bituminous					Korea Southern Power [100%]	Korea Electric Power Corp [100.0%]	34.9524	127.82	exact	Gadeok	Geumseong	Hadong	South Gyeongsang	https://www.gem.wiki/Hadong_power_station	L100000103485	G100000103533	KR7015760002	1	7000	7000	15	2049	2089	2129
coal	China	Asia	Eastern Asia	Heshun power station	Unit 1	潞安星光煤电公司和顺煤矸石发电厂	Lu'an Xingguang Heshun LHV Coal Power Plant, 山西国际能源和顺星光低热值煤发电	350	cancelled			unknown	waste coal					Shanxi Lu'an Group Xingguang Coal Power [100%]	Shanxi State-Owned Capital Investment and Operation Co Ltd [70.9%]; KEPCO Shanxi International [13.6%]; Lu'an Chemical Group Co Ltd [5.1%]; KEPCO Woori sprott Global Prive [3.2%]; Power Development [2.8%]; Shanxi Gemeng International Energy Group Co Ltd [2.8%]; other [1.6%]	37.3609	113.621	exact		Heshun County	Jinzhong	Shanxi	https://www.gem.wiki/Heshun_power_station	L100000101467	G100000111116	KR7015760002	0.136	700		-99	40	80	120
coal	China	Asia	Eastern Asia	Heshun power station	Unit 2	潞安星光煤电公司和顺煤矸石发电厂	Lu'an Xingguang Heshun LHV Coal Power Plant, 山西国际能源和顺星光低热值煤发电	350	cancelled			unknown	waste coal					Shanxi Lu'an Group Xingguang Coal Power [100%]	Shanxi State-Owned Capital Investment and Operation Co Ltd [70.9%]; KEPCO Shanxi International [13.6%]; Lu'an Chemical Group Co Ltd [5.1%]; KEPCO Woori sprott Global Prive [3.2%]; Power Development [2.8%]; Shanxi Gemeng International Energy Group Co Ltd [2.8%]; other [1.6%]	37.3609	113.621	exact		Heshun County	Jinzhong	Shanxi	https://www.gem.wiki/Heshun_power_station	L100000101467	G100000111117	KR7015760002	0.136	700	700	-99	40	80	120
coal	China	Asia	Eastern Asia	High River power station	Unit 1	潞安长子高河低热值煤电厂		660	operating	2021		ultra-supercritical	waste coal					Shanxi Luguang Power Generation [100%]	An Hui Wenergy Co Ltd [50.0%]; Shanxi State-Owned Capital Investment and Operation Co Ltd [21.2%]; KEPCO Shanxi International [17.0%]; KEPCO Woori sprott Global Prive [4.0%]; Power Development [3.5%]; Shanxi Gemeng International Energy Group Co Ltd [2.4%]; other [2.0%]	36.1651	112.962	exact	Gaohe	Changzi	Changzhi	Shanxi	https://www.gem.wiki/High_River_power_station	L100000101468	G100000103885	KR7015760002	0.17	1320		3	2061	2101	2141
coal	China	Asia	Eastern Asia	High River power station	Unit 2	潞安长子高河低热值煤电厂		660	operating	2021		ultra-supercritical	waste coal					Shanxi Luguang Power Generation [100%]	An Hui Wenergy Co Ltd [50.0%]; Shanxi State-Owned Capital Investment and Operation Co Ltd [21.2%]; KEPCO Shanxi International [17.0%]; KEPCO Woori sprott Global Prive [4.0%]; Power Development [3.5%]; Shanxi Gemeng International Energy Group Co Ltd [2.4%]; other [2.0%]	36.1651	112.962	exact	Gaohe	Changzi	Changzhi	Shanxi	https://www.gem.wiki/High_River_power_station	L100000101468	G100000103886	KR7015760002	0.17	1320	1320	3	2061	2101	2141
coal	South Korea	Asia	Eastern Asia	Honam power station	Unit 1	호남	호남 1 (Unit 1), 호남 2 (Unit 2)	250	retired	1973	2021	subcritical	bituminous					Korea East-West Power [100%]	Korea Electric Power Corp [100.0%]	34.8544	127.735	exact		Wolnae	Yeosu	North Jeolla	https://www.gem.wiki/Honam_power_station	L100000103472	G100000103929	KR7015760002	1	500		51	2013	2053	2093
coal	South Korea	Asia	Eastern Asia	Honam power station	Unit 2	호남	호남 1 (Unit 1), 호남 2 (Unit 2)	250	retired	1973	2021	subcritical	bituminous					Korea East-West Power [100%]	Korea Electric Power Corp [100.0%]	34.8544	127.735	exact		Wolnae	Yeosu	North Jeolla	https://www.gem.wiki/Honam_power_station	L100000103472	G100000103930	KR7015760002	1	500	500	51	2013	2053	2093
coal	Indonesia	Asia	South-eastern Asia	Jambi Tebo power station	Unit 1			200	cancelled			unknown	unknown					Korea South-East Power [100%]	Korea Electric Power Corp [100.0%]	-1.39	102.42	approximate			Tebo	Jambi	https://www.gem.wiki/Jambi_Tebo_power_station	L100000102743	G100000104953	KR7015760002	1	400		-99	40	80	120
coal	Indonesia	Asia	South-eastern Asia	Jambi Tebo power station	Unit 2			200	cancelled			unknown	unknown					Korea South-East Power [100%]	Korea Electric Power Corp [100.0%]	-1.39	102.42	approximate			Tebo	Jambi	https://www.gem.wiki/Jambi_Tebo_power_station	L100000102743	G100000104954	KR7015760002	1	400	400	-99	40	80	120
coal	China	Asia	Eastern Asia	Jiexiu Chongguang power station	Unit 1	山西国际能源介休崇光低热值煤电厂	Jiexiu Gangue power station	350	operating	2020		supercritical	waste coal					Shanxi Chongguang Power Generation [100%]	Shanxi Anyi Hongshan PORCELAIN Co Ltd [22.5%]; Jiexiu Yihong Investment Co Ltd [21.6%]; Shanxi State-Owned Capital Investment and Operation Co Ltd [21.6%]; KEPCO Shanxi International [17.3%]; Shanxi Ansheng Technology Development Co Ltd [4.9%]; KEPCO Woori sprott Global Prive [4.1%]; Power Development [3.6%]; Shanxi Gemeng International Energy Group Co Ltd [2.4%]; other [2.0%]	37.1065	111.996	exact	Yian Town	Jiexiu	Jinzhong	Shanxi	https://www.gem.wiki/Jiexiu_Chongguang_power_station	L100000101486	G100000105165	KR7015760002	0.173	700		4	2060	2100	2140
coal	China	Asia	Eastern Asia	Jiexiu Chongguang power station	Unit 2	山西国际能源介休崇光低热值煤电厂	Jiexiu Gangue power station	350	operating	2021		supercritical	waste coal					Shanxi Chongguang Power Generation [100%]	Shanxi Anyi Hongshan PORCELAIN Co Ltd [22.5%]; Jiexiu Yihong Investment Co Ltd [21.6%]; Shanxi State-Owned Capital Investment and Operation Co Ltd [21.6%]; KEPCO Shanxi International [17.3%]; Shanxi Ansheng Technology Development Co Ltd [4.9%]; KEPCO Woori sprott Global Prive [4.1%]; Power Development [3.6%]; Shanxi Gemeng International Energy Group Co Ltd [2.4%]; other [2.0%]	37.1065	111.996	exact	Yian Town	Jiexiu	Jinzhong	Shanxi	https://www.gem.wiki/Jiexiu_Chongguang_power_station	L100000101486	G100000105166	KR7015760002	0.173	700	700	3	2061	2101	2141
coal	Eswatini	Africa	Sub-Saharan Africa	KEPCO Eswatini power station	--			200	cancelled			unknown	unknown					Korea Electric Power [100%]	Korea Electric Power [100.0%]	-26.3167	31.133	approximate				Unknown	https://www.gem.wiki/KEPCO_Eswatini_power_station	L100000103525	G100000109777	KR7015760002	1	200	200	-99	40	80	120
coal	South Korea	Asia	Eastern Asia	KEPCO Gunsan power station	--	군산화력발전소	군산화력발전소	75	retired	1968	2004	subcritical	anthracite					Korea Western Power [100%]	Korea Electric Power Corp [100.0%]	35.9833	126.717	approximate	Gunsan	Soryong	Gunsan	North Jeolla	https://www.gem.wiki/KEPCO_Gunsan_power_station	L100000104842	G100000113088	KR7015760002	1	75	75	56	2008	2048	2088
coal	Senegal	Africa	Sub-Saharan Africa	Kepco Sendou power station	Unit 1			125	cancelled			unknown	unknown					Korea Electric Power [100%]	Korea Electric Power [100.0%]	14.6891	-17.2176	approximate	Sendou		Bagny	Dakar	https://www.gem.wiki/Kepco_Sendou_power_station	L100000103396	G100000105675	KR7015760002	1	250		-99	40	80	120
coal	Senegal	Africa	Sub-Saharan Africa	Kepco Sendou power station	Unit 2			125	cancelled			unknown	unknown					Korea Electric Power [100%]	Korea Electric Power [100.0%]	14.6891	-17.2176	approximate	Sendou		Bagny	Dakar	https://www.gem.wiki/Kepco_Sendou_power_station	L100000103396	G100000105676	KR7015760002	1	250	250	-99	40	80	120
coal	Philippines	Asia	South-eastern Asia	KEPCO Subic Bay power station	--		Subic-Freeport-2	200	cancelled			subcritical	unknown					KEPCO Philippines [100%]	Korea Electric Power Corp [100.0%]	14.8505	120.205	approximate	Subic Bay Freeport Zone		Zambales	Central Luzon	https://www.gem.wiki/KEPCO_Subic_Bay_power_station	L100000103172	G100000105677	KR7015760002	1	200	200	-99	40	80	120
coal	South Korea	Asia	Eastern Asia	KOWEPO Hadong power station	Unit 1	하동	Hadong (K project), 하동	1000	cancelled			unknown	unknown					Korea Western Power [100%]	Korea Electric Power Corp [100.0%]	35.0667	127.75	approximate	Hadong			South Gyeongsang	https://www.gem.wiki/KOWEPO_Hadong_power_station	L100000103486	G100000105915	KR7015760002	1	2000		-99	40	80	120
coal	South Korea	Asia	Eastern Asia	KOWEPO Hadong power station	Unit 2	하동	Hadong (K project), 하동	1000	cancelled			unknown	unknown					Korea Western Power [100%]	Korea Electric Power Corp [100.0%]	35.0667	127.75	approximate	Hadong			South Gyeongsang	https://www.gem.wiki/KOWEPO_Hadong_power_station	L100000103486	G100000105916	KR7015760002	1	2000	2000	-99	40	80	120
coal	China	Asia	Eastern Asia	Lingshi Qiguang power station	Unit 1	山西国际能源灵石启光低热值煤发电厂		350	operating	2019		supercritical	waste coal					Shanxi Qiguang Power Generation [100%]	Lingshi Deguangyi Investment and Trade Co Ltd [24.1%]; Lingshi Xinyuan Investment and Trade Co Ltd [24.1%]; Shanxi State-Owned Capital Investment and Operation Co Ltd [21.6%]; KEPCO Shanxi International [17.3%]; KEPCO Woori sprott Global Prive [4.1%]; Power Development [3.6%]; other [2.8%]; Shanxi Gemeng International Energy Group Co Ltd [2.4%]	36.8206	111.626	exact	Duanchun Town	Lingshi	Jinzhong	Shanxi	https://www.gem.wiki/Lingshi_Qiguang_power_station	L100000101492	G100000106307	KR7015760002	0.173	700		5	2059	2099	2139
coal	China	Asia	Eastern Asia	Lingshi Qiguang power station	Unit 2	山西国际能源灵石启光低热值煤发电厂		350	operating	2019		supercritical	waste coal					Shanxi Qiguang Power Generation [100%]	Lingshi Deguangyi Investment and Trade Co Ltd [24.1%]; Lingshi Xinyuan Investment and Trade Co Ltd [24.1%]; Shanxi State-Owned Capital Investment and Operation Co Ltd [21.6%]; KEPCO Shanxi International [17.3%]; KEPCO Woori sprott Global Prive [4.1%]; Power Development [3.6%]; other [2.8%]; Shanxi Gemeng International Energy Group Co Ltd [2.4%]	36.8206	111.626	exact	Duanchun Town	Lingshi	Jinzhong	Shanxi	https://www.gem.wiki/Lingshi_Qiguang_power_station	L100000101492	G100000106308	KR7015760002	0.173	700	700	5	2059	2099	2139
coal	Bangladesh	Asia	Southern Asia	Maheshkhali power station (KEPCO)	Unit 1		Moheshkhali power station	660	cancelled	2029		ultra-supercritical	unknown					Korea Electric Power [100%]	Korea Electric Power [100.0%]	21.633	91.9019	exact	Maheshkhali		Cox's Bazar	Chittagong	https://www.gem.wiki/Maheshkhali_power_station_(KEPCO)	L100000100066	G100000106579	KR7015760002	1	1320		-5	2069	2109	2149
coal	Bangladesh	Asia	Southern Asia	Maheshkhali power station (KEPCO)	Unit 2		Moheshkhali power station	660	cancelled	2029		ultra-supercritical	unknown					Korea Electric Power [100%]	Korea Electric Power [100.0%]	21.633	91.9019	exact	Maheshkhali		Cox's Bazar	Chittagong	https://www.gem.wiki/Maheshkhali_power_station_(KEPCO)	L100000100066	G100000113487	KR7015760002	1	1320		-5	2069	2109	2149
coal	Vietnam	Asia	South-eastern Asia	Nghi Son power station	Phase 2 Unit 1			660	operating	2022		supercritical	bituminous					Nghi Son 2 Power [100%]	Korea Electric Power Corp [50.0%]; Marubeni Corp [40.0%]; Tohoku Electric Power Co Inc [10.0%]	19.3158	105.8	exact	Nghi Son Economic Zone	Hai Ha	Tinh Gia	Thanh Hoa	https://www.gem.wiki/Nghi_Son_power_station	L100000104345	G100000107412	KR7015760002	0.5	1320		2	2062	2102	2142
coal	Vietnam	Asia	South-eastern Asia	Nghi Son power station	Phase 2 Unit 2			660	operating	2022		supercritical	bituminous					Nghi Son 2 Power [100%]	Korea Electric Power Corp [50.0%]; Marubeni Corp [40.0%]; Tohoku Electric Power Co Inc [10.0%]	19.3158	105.8	exact	Nghi Son Economic Zone	Hai Ha	Tinh Gia	Thanh Hoa	https://www.gem.wiki/Nghi_Son_power_station	L100000104345	G100000107413	KR7015760002	0.5	1320	1320	2	2062	2102	2142
coal	Philippines	Asia	South-eastern Asia	Panay power plant (Kepco)	Unit 1			50	cancelled			subcritical	unknown					KEPCO Philippines [100%]	Korea Electric Power Corp [100.0%]	10.9203	122.673	exact	Dingle		Iloilo	Western Visayas	https://www.gem.wiki/Panay_power_plant_(Kepco)	L100000103201	G100000107750	KR7015760002	1	100		-99	40	80	120
coal	Philippines	Asia	South-eastern Asia	Panay power plant (Kepco)	Unit 2			50	cancelled			subcritical	unknown					KEPCO Philippines [100%]	Korea Electric Power Corp [100.0%]	10.9203	122.673	exact	Dingle		Iloilo	Western Visayas	https://www.gem.wiki/Panay_power_plant_(Kepco)	L100000103201	G100000114104	KR7015760002	1	100	100	-99	40	80	120
coal	China	Asia	Eastern Asia	Pingshuo Gangue power station	Unit 1	山西国际能源平朔煤矸石发电厂		50	retired	2004	2020	subcritical	waste coal					Shanxi Pingshuo Gangue Power Generation [100%]	China Coal Pingshuo Coal Industry [33.0%]; Shanxi State-Owned Capital Investment and Operation Co Ltd [28.3%]; KEPCO Shanxi International [22.8%]; KEPCO Woori sprott Global Prive [5.4%]; Power Development [4.7%]; Shanxi Gemeng International Energy Group Co Ltd [3.1%]; other [2.7%]	39.4733	112.321	exact	Pinglu	Pinglu	Shuozhou	Shanxi	https://www.gem.wiki/Pingshuo_Gangue_power_station	L100000101501	G100000108003	KR7015760002	0.228	700		20	2044	2084	2124
coal	China	Asia	Eastern Asia	Pingshuo Gangue power station	Unit 2	山西国际能源平朔煤矸石发电厂		50	retired	2005	2020	subcritical	waste coal					Shanxi Pingshuo Gangue Power Generation [100%]	China Coal Pingshuo Coal Industry [33.0%]; Shanxi State-Owned Capital Investment and Operation Co Ltd [28.3%]; KEPCO Shanxi International [22.8%]; KEPCO Woori sprott Global Prive [5.4%]; Power Development [4.7%]; Shanxi Gemeng International Energy Group Co Ltd [3.1%]; other [2.7%]	39.4733	112.321	exact	Pinglu	Pinglu	Shuozhou	Shanxi	https://www.gem.wiki/Pingshuo_Gangue_power_station	L100000101501	G100000108004	KR7015760002	0.228	700		19	2045	2085	2125
coal	China	Asia	Eastern Asia	Pingshuo Gangue power station	Unit 3	山西国际能源平朔煤矸石发电厂		300	operating	2009		subcritical	waste coal					Shanxi Pingshuo Gangue Power Generation [100%]	China Coal Pingshuo Coal Industry [33.0%]; Shanxi State-Owned Capital Investment and Operation Co Ltd [28.3%]; KEPCO Shanxi International [22.8%]; KEPCO Woori sprott Global Prive [5.4%]; Power Development [4.7%]; Shanxi Gemeng International Energy Group Co Ltd [3.1%]; other [2.7%]	39.4728	112.323	exact	Pinglu	Pinglu	Shuozhou	Shanxi	https://www.gem.wiki/Pingshuo_Gangue_power_station	L100000101501	G100000108005	KR7015760002	0.228	700		15	2049	2089	2129
coal	China	Asia	Eastern Asia	Pingshuo Gangue power station	Unit 4	山西国际能源平朔煤矸石发电厂		300	operating	2009		subcritical	waste coal					Shanxi Pingshuo Gangue Power Generation [100%]	China Coal Pingshuo Coal Industry [33.0%]; Shanxi State-Owned Capital Investment and Operation Co Ltd [28.3%]; KEPCO Shanxi International [22.8%]; KEPCO Woori sprott Global Prive [5.4%]; Power Development [4.7%]; Shanxi Gemeng International Energy Group Co Ltd [3.1%]; other [2.7%]	39.4728	112.323	exact	Pinglu	Pinglu	Shuozhou	Shanxi	https://www.gem.wiki/Pingshuo_Gangue_power_station	L100000101501	G100000108006	KR7015760002	0.228	700	700	15	2049	2089	2129
coal	Vietnam	Asia	South-eastern Asia	Quang Tri power station	Phase 2 Unit 1			600	cancelled	2028		ultra-supercritical	bituminous					Korea Western Power [100%]	Korea Electric Power Corp [100.0%]	16.7566	107.367	approximate		Hai Khe	Hai Lang	Quang Tri	https://www.gem.wiki/Quang_Tri_power_station	L100000104339	G100000113291	KR7015760002	1	1200		-4	2068	2108	2148
coal	Vietnam	Asia	South-eastern Asia	Quang Tri power station	Phase 2 Unit 2			600	cancelled	2028		ultra-supercritical	bituminous					Korea Western Power [100%]	Korea Electric Power Corp [100.0%]	16.7566	107.367	approximate		Hai Khe	Hai Lang	Quang Tri	https://www.gem.wiki/Quang_Tri_power_station	L100000104339	G100000113292	KR7015760002	1	1200	1200	-4	2068	2108	2148
coal	South Korea	Asia	Eastern Asia	Samcheok Anthracite power station	--		part of the Samcheok Green power station	100	cancelled			supercritical	anthracite					Korea Southern Power [100%]	Korea Electric Power Corp [100.0%]	37.45	129.165	approximate	Samcheok			Gangwon	https://www.gem.wiki/Samcheok_Anthracite_power_station	L100000103462	G100000108756	KR7015760002	1	100	100	-99	40	80	120
coal	South Korea	Asia	Eastern Asia	Samcheok Green power station	Unit 1	삼척그린파워	삼척그린파워	1022	operating	2016	2046	ultra-supercritical	unknown					Korea Southern Power [100%]	Korea Electric Power Corp [100.0%]	37.186	129.342	exact	Hosan	Wondeok	Samcheok	Gangwon	https://www.gem.wiki/Samcheok_Green_power_station	L100000103463	G100000108757	KR7015760002	1	2044		8	2056	2096	2136
coal	South Korea	Asia	Eastern Asia	Samcheok Green power station	Unit 2	삼척그린파워	삼척그린파워	1022	operating	2017	2047	ultra-supercritical	unknown					Korea Southern Power [100%]	Korea Electric Power Corp [100.0%]	37.186	129.342	exact	Hosan	Wondeok	Samcheok	Gangwon	https://www.gem.wiki/Samcheok_Green_power_station	L100000103463	G100000108758	KR7015760002	1	2044	2044	7	2057	2097	2137
coal	South Korea	Asia	Eastern Asia	Samchonpo power station	Unit 1	삼천포 발전소	Samcheonpo power station, 삼천포 발전소	560	retired	1983	2021	subcritical	bituminous					Korea South-East Power [100%]	Korea Electric Power Corp [100.0%]	34.9107	128.108	exact	Deokho	Hai	Goseong	South Gyeongsang	https://www.gem.wiki/Samchonpo_power_station	L100000103487	G100000108759	KR7015760002	1	5360		41	2023	2063	2103
coal	South Korea	Asia	Eastern Asia	Samchonpo power station	Unit 2	삼천포 발전소	Samcheonpo power station, 삼천포 발전소	560	retired	1984	2021	subcritical	bituminous					Korea South-East Power [100%]	Korea Electric Power Corp [100.0%]	34.9107	128.108	exact	Deokho	Hai	Goseong	South Gyeongsang	https://www.gem.wiki/Samchonpo_power_station	L100000103487	G100000108760	KR7015760002	1	5360		40	2024	2064	2104
coal	South Korea	Asia	Eastern Asia	Samchonpo power station	Unit 3	삼천포 발전소	Samcheonpo power station, 삼천포 발전소	560	operating	1993	2024	subcritical	bituminous					Korea South-East Power [100%]	Korea Electric Power Corp [100.0%]	34.9107	128.108	exact	Deokho	Hai	Goseong	South Gyeongsang	https://www.gem.wiki/Samchonpo_power_station	L100000103487	G100000108761	KR7015760002	1	5360		31	2033	2073	2113
coal	South Korea	Asia	Eastern Asia	Samchonpo power station	Unit 4	삼천포 발전소	Samcheonpo power station, 삼천포 발전소	560	operating	1994	2024	subcritical	bituminous					Korea South-East Power [100%]	Korea Electric Power Corp [100.0%]	34.9107	128.108	exact	Deokho	Hai	Goseong	South Gyeongsang	https://www.gem.wiki/Samchonpo_power_station	L100000103487	G100000108762	KR7015760002	1	5360		30	2034	2074	2114
coal	South Korea	Asia	Eastern Asia	Samchonpo power station	Unit 5	삼천포 발전소	Samcheonpo power station, 삼천포 발전소	500	operating	1997	2027	supercritical	subbituminous					Korea South-East Power [100%]	Korea Electric Power Corp [100.0%]	34.9107	128.108	exact	Deokho	Hai	Goseong	South Gyeongsang	https://www.gem.wiki/Samchonpo_power_station	L100000103487	G100000108763	KR7015760002	1	5360		27	2037	2077	2117
coal	South Korea	Asia	Eastern Asia	Samchonpo power station	Unit 6	삼천포 발전소	Samcheonpo power station, 삼천포 발전소	500	operating	1998	2028	supercritical	subbituminous					Korea South-East Power [100%]	Korea Electric Power Corp [100.0%]	34.9107	128.108	exact	Deokho	Hai	Goseong	South Gyeongsang	https://www.gem.wiki/Samchonpo_power_station	L100000103487	G100000108764	KR7015760002	1	5360	5360	26	2038	2078	2118
coal	South Korea	Asia	Eastern Asia	Seocheon power station	Unit 1	서천 발전소	서천 발전소	200	retired	1983	2017	subcritical	anthracite					Korea Midland Power [100%]	Korea Electric Power Corp [100.0%]	36.1358	126.496	exact	Maryang-ri	Seocheon		South Chungcheong	https://www.gem.wiki/Seocheon_power_station	L100000103481	G100000108919	KR7015760002	1	400		41	2023	2063	2103
coal	South Korea	Asia	Eastern Asia	Seocheon power station	Unit 2	서천 발전소	서천 발전소	200	retired	1983	2017	subcritical	anthracite					Korea Midland Power [100%]	Korea Electric Power Corp [100.0%]	36.1358	126.496	exact	Maryang-ri	Seocheon		South Chungcheong	https://www.gem.wiki/Seocheon_power_station	L100000103481	G100000108920	KR7015760002	1	400	400	41	2023	2063	2103
coal	China	Asia	Eastern Asia	Shanxi Hepo power station	Unit 1	山西国际能源河坡发电厂		50	retired	1991	2016	subcritical	unknown					Shanxi Hepo Power Generation [100%]	Shanxi State-Owned Capital Investment and Operation Co Ltd [39.6%]; KEPCO Shanxi International [31.8%]; KEPCO Woori sprott Global Prive [7.5%]; Power Development [6.5%]; Yangquan Economic and Trade Asset Operation Center [6.5%]; Shanxi Gemeng International Energy Group Co Ltd [4.4%]; other [3.7%]	37.8469	113.617	exact	Yingying Town Xiayan Villege Baiquan Industrial Park	Jiaoqu	Yangquan	Shanxi	https://www.gem.wiki/Shanxi_Hepo_power_station	L100000101509	G100000109043	KR7015760002	0.318	1000		33	2031	2071	2111
coal	China	Asia	Eastern Asia	Shanxi Hepo power station	Unit 2	山西国际能源河坡发电厂		50	retired	1992	2016	subcritical	unknown					Shanxi Hepo Power Generation [100%]	Shanxi State-Owned Capital Investment and Operation Co Ltd [39.6%]; KEPCO Shanxi International [31.8%]; KEPCO Woori sprott Global Prive [7.5%]; Power Development [6.5%]; Yangquan Economic and Trade Asset Operation Center [6.5%]; Shanxi Gemeng International Energy Group Co Ltd [4.4%]; other [3.7%]	37.8469	113.617	exact	Yingying Town Xiayan Villege Baiquan Industrial Park	Jiaoqu	Yangquan	Shanxi	https://www.gem.wiki/Shanxi_Hepo_power_station	L100000101509	G100000109044	KR7015760002	0.318	1000		32	2032	2072	2112
coal	China	Asia	Eastern Asia	Shanxi Hepo power station	Unit 3	山西国际能源河坡发电厂		100	retired	2000	2016	subcritical	unknown					Shanxi Hepo Power Generation [100%]	Shanxi State-Owned Capital Investment and Operation Co Ltd [39.6%]; KEPCO Shanxi International [31.8%]; KEPCO Woori sprott Global Prive [7.5%]; Power Development [6.5%]; Yangquan Economic and Trade Asset Operation Center [6.5%]; Shanxi Gemeng International Energy Group Co Ltd [4.4%]; other [3.7%]	37.8469	113.617	exact	Yingying Town Xiayan Villege Baiquan Industrial Park	Jiaoqu	Yangquan	Shanxi	https://www.gem.wiki/Shanxi_Hepo_power_station	L100000101509	G100000109045	KR7015760002	0.318	1000		24	2040	2080	2120
coal	China	Asia	Eastern Asia	Shanxi Hepo power station	Unit 4	山西国际能源河坡发电厂		100	retired	2000	2016	subcritical	unknown					Shanxi Hepo Power Generation [100%]	Shanxi State-Owned Capital Investment and Operation Co Ltd [39.6%]; KEPCO Shanxi International [31.8%]; KEPCO Woori sprott Global Prive [7.5%]; Power Development [6.5%]; Yangquan Economic and Trade Asset Operation Center [6.5%]; Shanxi Gemeng International Energy Group Co Ltd [4.4%]; other [3.7%]	37.8469	113.617	exact	Yingying Town Xiayan Villege Baiquan Industrial Park	Jiaoqu	Yangquan	Shanxi	https://www.gem.wiki/Shanxi_Hepo_power_station	L100000101509	G100000109046	KR7015760002	0.318	1000		24	2040	2080	2120
coal	China	Asia	Eastern Asia	Shanxi Hepo power station	Unit 5	山西国际能源河坡发电厂		350	operating	2016		supercritical	unknown					Shanxi Hepo Power Generation [100%]	Shanxi State-Owned Capital Investment and Operation Co Ltd [39.6%]; KEPCO Shanxi International [31.8%]; KEPCO Woori sprott Global Prive [7.5%]; Power Development [6.5%]; Yangquan Economic and Trade Asset Operation Center [6.5%]; Shanxi Gemeng International Energy Group Co Ltd [4.4%]; other [3.7%]	37.9199	113.615	exact	Yingying Town Xiayan Villege Baiquan Industrial Park	Jiaoqu	Yangquan	Shanxi	https://www.gem.wiki/Shanxi_Hepo_power_station	L100000101509	G100000109047	KR7015760002	0.318	1000		8	2056	2096	2136
coal	China	Asia	Eastern Asia	Shanxi Hepo power station	Unit 6	山西国际能源河坡发电厂		350	operating	2016		supercritical	unknown					Shanxi Hepo Power Generation [100%]	Shanxi State-Owned Capital Investment and Operation Co Ltd [39.6%]; KEPCO Shanxi International [31.8%]; KEPCO Woori sprott Global Prive [7.5%]; Power Development [6.5%]; Yangquan Economic and Trade Asset Operation Center [6.5%]; Shanxi Gemeng International Energy Group Co Ltd [4.4%]; other [3.7%]	37.9199	113.615	exact	Yingying Town Xiayan Villege Baiquan Industrial Park	Jiaoqu	Yangquan	Shanxi	https://www.gem.wiki/Shanxi_Hepo_power_station	L100000101509	G100000109048	KR7015760002	0.318	1000	1000	8	2056	2096	2136
coal	China	Asia	Eastern Asia	Shanxi Liulin power station	Phase I Unit 1	山西国际能源柳林发电厂	Liulin Liansheng power station, Liulin Huaguang power station (Phase I Unit 1, Phase I Unit 2), Liulin Huaguang power station 柳林华光热电厂 (Phase II Unit 3, Phase II Unit 4)	100	operating	1995		subcritical	unknown					Shanxi Liulin Electric Power [100%]	Shanxi State-Owned Capital Investment and Operation Co Ltd [42.3%]; KEPCO Shanxi International [34.0%]; KEPCO Woori sprott Global Prive [8.0%]; Power Development [7.0%]; Shanxi Gemeng International Energy Group Co Ltd [4.7%]; other [4.0%]	37.4185	110.824	exact	Xuecun Town	Liulin	Lüliang	Shanxi	https://www.gem.wiki/Shanxi_Liulin_power_station	L100000105027	G100000106344	KR7015760002	0.34	1400		29	2035	2075	2115
coal	China	Asia	Eastern Asia	Shanxi Liulin power station	Phase I Unit 2	山西国际能源柳林发电厂	Liulin Liansheng power station, Liulin Huaguang power station (Phase I Unit 1, Phase I Unit 2), Liulin Huaguang power station 柳林华光热电厂 (Phase II Unit 3, Phase II Unit 4)	100	operating	1996		subcritical	unknown					Shanxi Liulin Electric Power [100%]	Shanxi State-Owned Capital Investment and Operation Co Ltd [42.3%]; KEPCO Shanxi International [34.0%]; KEPCO Woori sprott Global Prive [8.0%]; Power Development [7.0%]; Shanxi Gemeng International Energy Group Co Ltd [4.7%]; other [4.0%]	37.4185	110.824	exact	Xuecun Town	Liulin	Lüliang	Shanxi	https://www.gem.wiki/Shanxi_Liulin_power_station	L100000105027	G100000106345	KR7015760002	0.34	1400		28	2036	2076	2116
coal	China	Asia	Eastern Asia	Shanxi Liulin power station	Phase II Unit 3	山西国际能源柳林发电厂	Liulin Liansheng power station, Liulin Huaguang power station (Phase I Unit 1, Phase I Unit 2), Liulin Huaguang power station 柳林华光热电厂 (Phase II Unit 3, Phase II Unit 4)	600	operating	2008		subcritical	unknown					Shanxi Huaguang Power Generation [100%]	China Huaneng Group Co Ltd [40.0%]; Shanxi State-Owned Capital Investment and Operation Co Ltd [21.2%]; KEPCO Shanxi International [17.0%]; Shanxi Coking Coal Energy Group Co Ltd [10.0%]; KEPCO Woori sprott Global Prive [4.0%]; Power Development [3.5%]; Shanxi Gemeng International Energy Group Co Ltd [2.4%]; other [2.0%]	37.4185	110.824	exact	Xuecun Town	Liulin	Lüliang	Shanxi	https://www.gem.wiki/Shanxi_Liulin_power_station	L100000105027	G100000106346	KR7015760002	0.17	1400		16	2048	2088	2128
coal	China	Asia	Eastern Asia	Shanxi Liulin power station	Phase II Unit 4	山西国际能源柳林发电厂	Liulin Liansheng power station, Liulin Huaguang power station (Phase I Unit 1, Phase I Unit 2), Liulin Huaguang power station 柳林华光热电厂 (Phase II Unit 3, Phase II Unit 4)	600	operating	2008		subcritical	unknown					Shanxi Huaguang Power Generation [100%]	China Huaneng Group Co Ltd [40.0%]; Shanxi State-Owned Capital Investment and Operation Co Ltd [21.2%]; KEPCO Shanxi International [17.0%]; Shanxi Coking Coal Energy Group Co Ltd [10.0%]; KEPCO Woori sprott Global Prive [4.0%]; Power Development [3.5%]; Shanxi Gemeng International Energy Group Co Ltd [2.4%]; other [2.0%]	37.4185	110.824	exact	Xuecun Town	Liulin	Lüliang	Shanxi	https://www.gem.wiki/Shanxi_Liulin_power_station	L100000105027	G100000106347	KR7015760002	0.17	1400	1400	16	2048	2088	2128
coal	China	Asia	Eastern Asia	Shanxi Ruiguang power station	Phase I Unit 1	山西国际能源瑞光热电公司热电联产		330	operating	2011		subcritical	bituminous					Shanxi Ruiguang Power [100%]	Shanxi State-Owned Capital Investment and Operation Co Ltd [42.3%]; KEPCO Shanxi International [34.0%]; KEPCO Woori sprott Global Prive [8.0%]; Power Development [7.0%]; Shanxi Gemeng International Energy Group Co Ltd [4.7%]; other [4.0%]	37.7846	112.72	exact	Wujinshan	Yuci	Jinzhong	Shanxi	https://www.gem.wiki/Shanxi_Ruiguang_power_station	L100000101511	G100000109051	KR7015760002	0.34	1860		13	2051	2091	2131
coal	China	Asia	Eastern Asia	Shanxi Ruiguang power station	Phase I Unit 2	山西国际能源瑞光热电公司热电联产		330	operating	2012		subcritical	bituminous					Shanxi Ruiguang Power [100%]	Shanxi State-Owned Capital Investment and Operation Co Ltd [42.3%]; KEPCO Shanxi International [34.0%]; KEPCO Woori sprott Global Prive [8.0%]; Power Development [7.0%]; Shanxi Gemeng International Energy Group Co Ltd [4.7%]; other [4.0%]	37.7846	112.72	exact	Wujinshan	Yuci	Jinzhong	Shanxi	https://www.gem.wiki/Shanxi_Ruiguang_power_station	L100000101511	G100000109052	KR7015760002	0.34	1860		12	2052	2092	2132
coal	China	Asia	Eastern Asia	Shanxi Ruiguang power station	Phase II Unit 3	山西国际能源瑞光热电公司热电联产		600	cancelled			unknown	bituminous					Shanxi Ruiguang Power [100%]	Shanxi State-Owned Capital Investment and Operation Co Ltd [42.3%]; KEPCO Shanxi International [34.0%]; KEPCO Woori sprott Global Prive [8.0%]; Power Development [7.0%]; Shanxi Gemeng International Energy Group Co Ltd [4.7%]; other [4.0%]	37.7846	112.72	exact	Wujinshan	Yuci	Jinzhong	Shanxi	https://www.gem.wiki/Shanxi_Ruiguang_power_station	L100000101511	G100000109053	KR7015760002	0.34	1860		-99	40	80	120
coal	China	Asia	Eastern Asia	Shanxi Ruiguang power station	Phase II Unit 4	山西国际能源瑞光热电公司热电联产		600	cancelled			unknown	bituminous					Shanxi Ruiguang Power [100%]	Shanxi State-Owned Capital Investment and Operation Co Ltd [42.3%]; KEPCO Shanxi International [34.0%]; KEPCO Woori sprott Global Prive [8.0%]; Power Development [7.0%]; Shanxi Gemeng International Energy Group Co Ltd [4.7%]; other [4.0%]	37.7846	112.72	exact	Wujinshan	Yuci	Jinzhong	Shanxi	https://www.gem.wiki/Shanxi_Ruiguang_power_station	L100000101511	G100000109054	KR7015760002	0.34	1860	1860	-99	40	80	120
coal	China	Asia	Eastern Asia	Shanxi Yuguang power station	Phase I Unit 1	山西山阴煤矸石发电	Shanxi Shanyin power station, 昱光（山阴）煤矸石综合利用发电项目一期 (Phase I Unit 1, Phase I Unit 2), 昱光（山阴）煤矸石综合利用发电项目二期 (Phase II Unit 3, Phase II Unit 4)	300	operating	2012		subcritical	waste coal					Shanxi Yuguang Power Generation [100%]	Shanxi State-Owned Capital Investment and Operation Co Ltd [25.4%]; China National Coal Group [24.0%]; KEPCO Shanxi International [20.4%]; Beijing Ward Financial Investment Holding Co Ltd [15.5%]; KEPCO Woori sprott Global Prive [4.8%]; Power Development [4.2%]; other [2.9%]; Shanxi Gemeng International Energy Group Co Ltd [2.8%]	39.6159	112.799	exact	Beizhouzhuang	Shanyin	Shuozhou	Shanxi	https://www.gem.wiki/Shanxi_Yuguang_power_station	L100000101514	G100000109057	KR7015760002	0.204	1300		12	2052	2092	2132
coal	China	Asia	Eastern Asia	Shanxi Yuguang power station	Phase I Unit 2	山西山阴煤矸石发电	Shanxi Shanyin power station, 昱光（山阴）煤矸石综合利用发电项目一期 (Phase I Unit 1, Phase I Unit 2), 昱光（山阴）煤矸石综合利用发电项目二期 (Phase II Unit 3, Phase II Unit 4)	300	operating	2012		subcritical	waste coal					Shanxi Yuguang Power Generation [100%]	Shanxi State-Owned Capital Investment and Operation Co Ltd [25.4%]; China National Coal Group [24.0%]; KEPCO Shanxi International [20.4%]; Beijing Ward Financial Investment Holding Co Ltd [15.5%]; KEPCO Woori sprott Global Prive [4.8%]; Power Development [4.2%]; other [2.9%]; Shanxi Gemeng International Energy Group Co Ltd [2.8%]	39.6159	112.799	exact	Beizhouzhuang	Shanyin	Shuozhou	Shanxi	https://www.gem.wiki/Shanxi_Yuguang_power_station	L100000101514	G100000109058	KR7015760002	0.204	1300		12	2052	2092	2132
coal	China	Asia	Eastern Asia	Shanxi Yuguang power station	Phase II Unit 3	山西山阴煤矸石发电	Shanxi Shanyin power station, 昱光（山阴）煤矸石综合利用发电项目一期 (Phase I Unit 1, Phase I Unit 2), 昱光（山阴）煤矸石综合利用发电项目二期 (Phase II Unit 3, Phase II Unit 4)	350	operating	2019		supercritical	waste coal					Shanxi Yuguang Power Generation [100%]	Shanxi State-Owned Capital Investment and Operation Co Ltd [25.4%]; China National Coal Group [24.0%]; KEPCO Shanxi International [20.4%]; Beijing Ward Financial Investment Holding Co Ltd [15.5%]; KEPCO Woori sprott Global Prive [4.8%]; Power Development [4.2%]; other [2.9%]; Shanxi Gemeng International Energy Group Co Ltd [2.8%]	39.6159	112.799	exact	Beizhouzhuang	Shanyin	Shuozhou	Shanxi	https://www.gem.wiki/Shanxi_Yuguang_power_station	L100000101514	G100000109059	KR7015760002	0.204	1300		5	2059	2099	2139
coal	China	Asia	Eastern Asia	Shanxi Yuguang power station	Phase II Unit 4	山西山阴煤矸石发电	Shanxi Shanyin power station, 昱光（山阴）煤矸石综合利用发电项目一期 (Phase I Unit 1, Phase I Unit 2), 昱光（山阴）煤矸石综合利用发电项目二期 (Phase II Unit 3, Phase II Unit 4)	350	operating	2019		supercritical	waste coal					Shanxi Yuguang Power Generation [100%]	Shanxi State-Owned Capital Investment and Operation Co Ltd [25.4%]; China National Coal Group [24.0%]; KEPCO Shanxi International [20.4%]; Beijing Ward Financial Investment Holding Co Ltd [15.5%]; KEPCO Woori sprott Global Prive [4.8%]; Power Development [4.2%]; other [2.9%]; Shanxi Gemeng International Energy Group Co Ltd [2.8%]	39.6159	112.799	exact	Beizhouzhuang	Shanyin	Shuozhou	Shanxi	https://www.gem.wiki/Shanxi_Yuguang_power_station	L100000101514	G100000109060	KR7015760002	0.204	1300	1300	5	2059	2099	2139
coal	China	Asia	Eastern Asia	Shanxi Zhaoguang power station	Unit 1	山西国际能源兆光发电厂		300	operating	2005		subcritical	bituminous					Shanxi Zhaoguang Power Generation [100%]	Shanxi State-Owned Capital Investment and Operation Co Ltd [42.3%]; KEPCO Shanxi International [34.0%]; KEPCO Woori sprott Global Prive [8.0%]; Power Development [7.0%]; Shanxi Gemeng International Energy Group Co Ltd [4.7%]; other [4.0%]	36.5538	111.692	exact	Bailong	Huozhou	Linfen	Shanxi	https://www.gem.wiki/Shanxi_Zhaoguang_power_station	L100000101515	G100000109061	KR7015760002	0.34	1800		19	2045	2085	2125
coal	China	Asia	Eastern Asia	Shanxi Zhaoguang power station	Unit 2	山西国际能源兆光发电厂		300	operating	2005		subcritical	bituminous					Shanxi Zhaoguang Power Generation [100%]	Shanxi State-Owned Capital Investment and Operation Co Ltd [42.3%]; KEPCO Shanxi International [34.0%]; KEPCO Woori sprott Global Prive [8.0%]; Power Development [7.0%]; Shanxi Gemeng International Energy Group Co Ltd [4.7%]; other [4.0%]	36.5538	111.692	exact	Bailong	Huozhou	Linfen	Shanxi	https://www.gem.wiki/Shanxi_Zhaoguang_power_station	L100000101515	G100000109062	KR7015760002	0.34	1800		19	2045	2085	2125
coal	China	Asia	Eastern Asia	Shanxi Zhaoguang power station	Unit 3	山西国际能源兆光发电厂		600	operating	2009		supercritical	bituminous					Shanxi Zhaoguang Power Generation [100%]	Shanxi State-Owned Capital Investment and Operation Co Ltd [42.3%]; KEPCO Shanxi International [34.0%]; KEPCO Woori sprott Global Prive [8.0%]; Power Development [7.0%]; Shanxi Gemeng International Energy Group Co Ltd [4.7%]; other [4.0%]	36.5538	111.692	exact	Bailong	Huozhou	Linfen	Shanxi	https://www.gem.wiki/Shanxi_Zhaoguang_power_station	L100000101515	G100000109063	KR7015760002	0.34	1800		15	2049	2089	2129
coal	China	Asia	Eastern Asia	Shanxi Zhaoguang power station	Unit 4	山西国际能源兆光发电厂		600	operating	2009		supercritical	bituminous					Shanxi Zhaoguang Power Generation [100%]	Shanxi State-Owned Capital Investment and Operation Co Ltd [42.3%]; KEPCO Shanxi International [34.0%]; KEPCO Woori sprott Global Prive [8.0%]; Power Development [7.0%]; Shanxi Gemeng International Energy Group Co Ltd [4.7%]; other [4.0%]	36.5538	111.692	exact	Bailong	Huozhou	Linfen	Shanxi	https://www.gem.wiki/Shanxi_Zhaoguang_power_station	L100000101515	G100000109064	KR7015760002	0.34	1800	1800	15	2049	2089	2129
coal	South Korea	Asia	Eastern Asia	Shin Boryeong power station	Unit 1	신보령화력	Sin Boryeong power station, Shin Poryong power station, f	1000	operating	2017	2047	ultra-supercritical	bituminous					Korea Midland Power [100%]	Korea Electric Power Corp [100.0%]	36.3846	126.486	exact	Poryong-gun	Ocheon	Poryong	South Chungcheong	https://www.gem.wiki/Shin_Boryeong_power_station	L100000103482	G100000109277	KR7015760002	1	2000		7	2057	2097	2137
coal	South Korea	Asia	Eastern Asia	Shin Boryeong power station	Unit 2	신보령화력	Sin Boryeong power station, Shin Poryong power station, f	1000	operating	2017	2047	ultra-supercritical	bituminous					Korea Midland Power [100%]	Korea Electric Power Corp [100.0%]	36.3846	126.486	exact	Poryong-gun	Ocheon	Poryong	South Chungcheong	https://www.gem.wiki/Shin_Boryeong_power_station	L100000103482	G100000109269	KR7015760002	1	2000	2000	7	2057	2097	2137
coal	South Korea	Asia	Eastern Asia	Shin Seocheon power station	--	신서천 발전소	Sin Seocheon power station, New Seocheon power station, 신서천 발전소	1018	operating	2021	2051	ultra-supercritical	bituminous					Korea Midland Power [100%]	Korea Electric Power Corp [100.0%]	36.1441	126.496	exact	Maryang-ri	Seocheon		South Chungcheong	https://www.gem.wiki/Shin_Seocheon_power_station	L100000104888	G100000108918	KR7015760002	1	1018	1018	3	2061	2101	2141
coal	Philippines	Asia	South-eastern Asia	Sual KEPCO Power Station	Unit 1			500	cancelled	2024		ultra-supercritical	unknown					KEPCO Philippines [100%]	Korea Electric Power Corp [100.0%]	16.091	120.096	approximate		Sual	Pangasinan	Central Luzon	https://www.gem.wiki/Sual_KEPCO_Power_Station	L100000104384	G100000113917	KR7015760002	1	1000		0	2064	2104	2144
coal	Philippines	Asia	South-eastern Asia	Sual KEPCO Power Station	Unit 2			500	cancelled	2025		ultra-supercritical	unknown					KEPCO Philippines [100%]	Korea Electric Power Corp [100.0%]	16.091	120.096	approximate		Sual	Pangasinan	Central Luzon	https://www.gem.wiki/Sual_KEPCO_Power_Station	L100000104384	G100000114305	KR7015760002	1	1000	1000	-1	2065	2105	2145
coal	Indonesia	Asia	South-eastern Asia	Tabalong power station	Unit 1		Kalsel FTP2	100	operating	2019		subcritical	lignite					PT Tanjung Power Indonesia [100%]	PT Adaro Power [65.0%]; Korea Electric Power Corp [35.0%]	-2.16343	115.441	exact	Adaro's Tanjung coal mine		Tabalong	South Kalimantan	https://www.gem.wiki/Tabalong_power_station	L100000102785	G100000109790	KR7015760002	0.35	200		5	2059	2099	2139
coal	Indonesia	Asia	South-eastern Asia	Tabalong power station	Unit 2		Kalsel FTP2	100	operating	2019		subcritical	lignite					PT Tanjung Power Indonesia [100%]	PT Adaro Power [65.0%]; Korea Electric Power Corp [35.0%]	-2.16343	115.441	exact	Adaro's Tanjung coal mine		Tabalong	South Kalimantan	https://www.gem.wiki/Tabalong_power_station	L100000102785	G100000109791	KR7015760002	0.35	200	200	5	2059	2099	2139
coal	South Korea	Asia	Eastern Asia	Taean power station	Unit 1	태안화력	태안화력	500	operating	1995	2025	supercritical	bituminous					Korea Western Power [100%]	Korea Electric Power Corp [100.0%]	36.9033	126.234	exact	Banggal	Wonbuk	Taean	South Chungcheong	https://www.gem.wiki/Taean_power_station	L100000103483	G100000109801	KR7015760002	1	9446		29	2035	2075	2115
coal	South Korea	Asia	Eastern Asia	Taean power station	Unit 2	태안화력	태안화력	500	operating	1996	2025	supercritical	bituminous					Korea Western Power [100%]	Korea Electric Power Corp [100.0%]	36.9033	126.234	exact	Banggal	Wonbuk	Taean	South Chungcheong	https://www.gem.wiki/Taean_power_station	L100000103483	G100000109803	KR7015760002	1	9446		28	2036	2076	2116
coal	South Korea	Asia	Eastern Asia	Taean power station	Unit 3	태안화력	태안화력	500	operating	1997	2028	supercritical	bituminous					Korea Western Power [100%]	Korea Electric Power Corp [100.0%]	36.9033	126.234	exact	Banggal	Wonbuk	Taean	South Chungcheong	https://www.gem.wiki/Taean_power_station	L100000103483	G100000109804	KR7015760002	1	9446		27	2037	2077	2117
coal	South Korea	Asia	Eastern Asia	Taean power station	Unit 4	태안화력	태안화력	500	operating	1997	2029	supercritical	bituminous					Korea Western Power [100%]	Korea Electric Power Corp [100.0%]	36.9033	126.234	exact	Banggal	Wonbuk	Taean	South Chungcheong	https://www.gem.wiki/Taean_power_station	L100000103483	G100000109805	KR7015760002	1	9446		27	2037	2077	2117
coal	South Korea	Asia	Eastern Asia	Taean power station	Unit 5	태안화력	태안화력	500	operating	2001	2032	supercritical	bituminous					Korea Western Power [100%]	Korea Electric Power Corp [100.0%]	36.9033	126.234	exact	Banggal	Wonbuk	Taean	South Chungcheong	https://www.gem.wiki/Taean_power_station	L100000103483	G100000109806	KR7015760002	1	9446		23	2041	2081	2121
coal	South Korea	Asia	Eastern Asia	Taean power station	Unit 6	태안화력	태안화력	500	operating	2002	2032	supercritical	bituminous					Korea Western Power [100%]	Korea Electric Power Corp [100.0%]	36.9033	126.234	exact	Banggal	Wonbuk	Taean	South Chungcheong	https://www.gem.wiki/Taean_power_station	L100000103483	G100000109807	KR7015760002	1	9446		22	2042	2082	2122
coal	South Korea	Asia	Eastern Asia	Taean power station	Unit 7	태안화력	태안화력	500	operating	2007	2037	ultra-supercritical	bituminous					Korea Western Power [100%]	Korea Electric Power Corp [100.0%]	36.9033	126.234	exact	Banggal	Wonbuk	Taean	South Chungcheong	https://www.gem.wiki/Taean_power_station	L100000103483	G100000109808	KR7015760002	1	9446		17	2047	2087	2127
coal	South Korea	Asia	Eastern Asia	Taean power station	Unit 8	태안화력	태안화력	500	operating	2007	2037	ultra-supercritical	bituminous					Korea Western Power [100%]	Korea Electric Power Corp [100.0%]	36.9033	126.234	exact	Banggal	Wonbuk	Taean	South Chungcheong	https://www.gem.wiki/Taean_power_station	L100000103483	G100000109809	KR7015760002	1	9446		17	2047	2087	2127
coal	South Korea	Asia	Eastern Asia	Taean power station	Unit 9	태안화력	태안화력	1050	operating	2016	2046	ultra-supercritical	bituminous					Korea Western Power [100%]	Korea Electric Power Corp [100.0%]	36.9056	126.235	exact	Banggal	Wonbuk	Taean	South Chungcheong	https://www.gem.wiki/Taean_power_station	L100000103483	G100000109810	KR7015760002	1	9446		8	2056	2096	2136
coal	South Korea	Asia	Eastern Asia	Taean power station	IGCC Project	태안화력	태안화력	346	operating	2016		IGCC	unknown					Korea Western Power [100%]	Korea Electric Power Corp [100.0%]	36.9056	126.235	exact	Banggal	Wonbuk	Taean	South Chungcheong	https://www.gem.wiki/Taean_power_station	L100000103483	G100000109800	KR7015760002	1	9446		8	2056	2096	2136
coal	South Korea	Asia	Eastern Asia	Taean power station	Unit 10	태안화력	태안화력	1050	operating	2017	2047	ultra-supercritical	bituminous					Korea Western Power [100%]	Korea Electric Power Corp [100.0%]	36.9056	126.235	exact	Banggal	Wonbuk	Taean	South Chungcheong	https://www.gem.wiki/Taean_power_station	L100000103483	G100000109802	KR7015760002	1	9446	9446	7	2057	2097	2137
coal	China	Asia	Eastern Asia	Xinguang power station	Unit 1	山西国际能源晋煤赵庄鑫光发电厂	Zhaozhuang power station, 金光低热值煤发电	660	cancelled			ultra-supercritical	waste coal					Shanxi Zhaozhuang Xinguang Power Generation [100%]	Shanxi State-Owned Capital Investment and Operation Co Ltd [52.7%]; KEPCO Shanxi International [17.0%]; China Development Bank Corp [8.1%]; China Cinda Asset Management Co Ltd [6.8%]; KEPCO Woori sprott Global Prive [4.0%]; Jinneng Holding Group Co Ltd [3.5%]; Power Development [3.5%]; Shanxi Gemeng International Energy Group Co Ltd [2.4%]; other [2.0%]	35.9987	112.899	exact	Cilin Town Xizhanggou Village	Changzi	Changzhi	Shanxi	https://www.gem.wiki/Xinguang_power_station	L100000101488	G100000105223	KR7015760002	0.17	1320		-99	40	80	120
coal	China	Asia	Eastern Asia	Xinguang power station	Unit 2	山西国际能源晋煤赵庄鑫光发电厂	Zhaozhuang power station, 金光低热值煤发电	660	cancelled			ultra-supercritical	waste coal					Shanxi Zhaozhuang Xinguang Power Generation [100%]	Shanxi State-Owned Capital Investment and Operation Co Ltd [52.7%]; KEPCO Shanxi International [17.0%]; China Development Bank Corp [8.1%]; China Cinda Asset Management Co Ltd [6.8%]; KEPCO Woori sprott Global Prive [4.0%]; Jinneng Holding Group Co Ltd [3.5%]; Power Development [3.5%]; Shanxi Gemeng International Energy Group Co Ltd [2.4%]; other [2.0%]	35.9987	112.899	exact	Cilin Town Zhaozhuang	Changzi	Changzhi	Shanxi	https://www.gem.wiki/Xinguang_power_station	L100000101488	G100000105224	KR7015760002	0.17	1320	1320	-99	40	80	120
coal	China	Asia	Eastern Asia	Yangcheng power station	Phase I Unit 1	山西阳城发电厂	大唐阳城电厂	350	operating	2001		subcritical	anthracite					Yangcheng International Power Generating [100%]	China Datang Corp [38.7%]; Jiangsu Guoxin Investment Group Ltd [26.7%]; Shanxi State-Owned Capital Investment and Operation Co Ltd [9.0%]; KEPCO Shanxi International [7.3%]; China Energy Construction Group Co Ltd [6.7%]; Power Construction Corporation of China [6.7%]; KEPCO Woori sprott Global Prive [1.7%]; Power Development [1.5%]; Shanxi Gemeng International Energy Group Co Ltd [1.0%]; other [0…	35.4661	112.574	exact	Beiliu	Yangcheng	Jincheng	Shanxi	https://www.gem.wiki/Yangcheng_power_station	L100000101543	G100000111277	KR7015760002	0.073	5300		23	2041	2081	2121
coal	China	Asia	Eastern Asia	Yangcheng power station	Phase I Unit 2	山西阳城发电厂	大唐阳城电厂	350	operating	2001		subcritical	anthracite					Yangcheng International Power Generating [100%]	China Datang Corp [38.7%]; Jiangsu Guoxin Investment Group Ltd [26.7%]; Shanxi State-Owned Capital Investment and Operation Co Ltd [9.0%]; KEPCO Shanxi International [7.3%]; China Energy Construction Group Co Ltd [6.7%]; Power Construction Corporation of China [6.7%]; KEPCO Woori sprott Global Prive [1.7%]; Power Development [1.5%]; Shanxi Gemeng International Energy Group Co Ltd [1.0%]; other [0…	35.4661	112.574	exact	Beiliu	Yangcheng	Jincheng	Shanxi	https://www.gem.wiki/Yangcheng_power_station	L100000101543	G100000111278	KR7015760002	0.073	5300		23	2041	2081	2121
coal	China	Asia	Eastern Asia	Yangcheng power station	Phase I Unit 3	山西阳城发电厂	大唐阳城电厂	350	operating	2001		subcritical	anthracite					Yangcheng International Power Generating [100%]	China Datang Corp [38.7%]; Jiangsu Guoxin Investment Group Ltd [26.7%]; Shanxi State-Owned Capital Investment and Operation Co Ltd [9.0%]; KEPCO Shanxi International [7.3%]; China Energy Construction Group Co Ltd [6.7%]; Power Construction Corporation of China [6.7%]; KEPCO Woori sprott Global Prive [1.7%]; Power Development [1.5%]; Shanxi Gemeng International Energy Group Co Ltd [1.0%]; other [0…	35.4661	112.574	exact	Beiliu	Yangcheng	Jincheng	Shanxi	https://www.gem.wiki/Yangcheng_power_station	L100000101543	G100000111279	KR7015760002	0.073	5300		23	2041	2081	2121
coal	China	Asia	Eastern Asia	Yangcheng power station	Phase I Unit 4	山西阳城发电厂	大唐阳城电厂	350	operating	2002		subcritical	anthracite					Yangcheng International Power Generating [100%]	China Datang Corp [38.7%]; Jiangsu Guoxin Investment Group Ltd [26.7%]; Shanxi State-Owned Capital Investment and Operation Co Ltd [9.0%]; KEPCO Shanxi International [7.3%]; China Energy Construction Group Co Ltd [6.7%]; Power Construction Corporation of China [6.7%]; KEPCO Woori sprott Global Prive [1.7%]; Power Development [1.5%]; Shanxi Gemeng International Energy Group Co Ltd [1.0%]; other [0…	35.4661	112.574	exact	Beiliu	Yangcheng	Jincheng	Shanxi	https://www.gem.wiki/Yangcheng_power_station	L100000101543	G100000111280	KR7015760002	0.073	5300		22	2042	2082	2122
coal	China	Asia	Eastern Asia	Yangcheng power station	Phase I Unit 5	山西阳城发电厂	大唐阳城电厂	350	operating	2002		subcritical	anthracite					Yangcheng International Power Generating [100%]	China Datang Corp [38.7%]; Jiangsu Guoxin Investment Group Ltd [26.7%]; Shanxi State-Owned Capital Investment and Operation Co Ltd [9.0%]; KEPCO Shanxi International [7.3%]; China Energy Construction Group Co Ltd [6.7%]; Power Construction Corporation of China [6.7%]; KEPCO Woori sprott Global Prive [1.7%]; Power Development [1.5%]; Shanxi Gemeng International Energy Group Co Ltd [1.0%]; other [0…	35.4661	112.574	exact	Beiliu	Yangcheng	Jincheng	Shanxi	https://www.gem.wiki/Yangcheng_power_station	L100000101543	G100000111281	KR7015760002	0.073	5300		22	2042	2082	2122
coal	China	Asia	Eastern Asia	Yangcheng power station	Phase I Unit 6	山西阳城发电厂	大唐阳城电厂	350	operating	2002		subcritical	anthracite					Yangcheng International Power Generating [100%]	China Datang Corp [38.7%]; Jiangsu Guoxin Investment Group Ltd [26.7%]; Shanxi State-Owned Capital Investment and Operation Co Ltd [9.0%]; KEPCO Shanxi International [7.3%]; China Energy Construction Group Co Ltd [6.7%]; Power Construction Corporation of China [6.7%]; KEPCO Woori sprott Global Prive [1.7%]; Power Development [1.5%]; Shanxi Gemeng International Energy Group Co Ltd [1.0%]; other [0…	35.4661	112.574	exact	Beiliu	Yangcheng	Jincheng	Shanxi	https://www.gem.wiki/Yangcheng_power_station	L100000101543	G100000111282	KR7015760002	0.073	5300		22	2042	2082	2122
coal	China	Asia	Eastern Asia	Yangcheng power station	Phase II Unit 7	山西阳城发电厂	大唐阳城电厂	600	operating	2007		subcritical	anthracite					Datang Yangcheng Power Generation [100%]	China Datang Corp [41.0%]; Jiangsu Guoxin Investment Group Ltd [30.0%]; Shanxi State-Owned Capital Investment and Operation Co Ltd [12.3%]; KEPCO Shanxi International [9.9%]; KEPCO Woori sprott Global Prive [2.3%]; Power Development [2.0%]; Shanxi Gemeng International Energy Group Co Ltd [1.4%]; other [1.2%]	35.4661	112.574	exact	Beiliu	Yangcheng	Jincheng	Shanxi	https://www.gem.wiki/Yangcheng_power_station	L100000101543	G100000111283	KR7015760002	0.099	5300		17	2047	2087	2127
coal	China	Asia	Eastern Asia	Yangcheng power station	Phase II Unit 8	山西阳城发电厂	大唐阳城电厂	600	operating	2007		subcritical	anthracite					Datang Yangcheng Power Generation [100%]	China Datang Corp [41.0%]; Jiangsu Guoxin Investment Group Ltd [30.0%]; Shanxi State-Owned Capital Investment and Operation Co Ltd [12.3%]; KEPCO Shanxi International [9.9%]; KEPCO Woori sprott Global Prive [2.3%]; Power Development [2.0%]; Shanxi Gemeng International Energy Group Co Ltd [1.4%]; other [1.2%]	35.4661	112.574	exact	Beiliu	Yangcheng	Jincheng	Shanxi	https://www.gem.wiki/Yangcheng_power_station	L100000101543	G100000111284	KR7015760002	0.099	5300		17	2047	2087	2127
coal	China	Asia	Eastern Asia	Yangcheng power station	Phase III Unit 10	山西阳城发电厂	大唐阳城电厂	1000	announced			ultra-supercritical	anthracite					Yangcheng International Power Generating	China Datang Corp; China Energy Construction Group Co Ltd; Jiangsu Guoxin Investment Group Ltd; KEPCO Shanxi International; KEPCO Woori sprott Global Prive; other; Power Construction Corporation of China; Power Development; Shanxi Gemeng International Energy Group Co Ltd; Shanxi State-Owned Capital Investment and Operation Co Ltd	35.4661	112.574	exact	Beiliu	Yangcheng	Jincheng	Shanxi	https://www.gem.wiki/Yangcheng_power_station	L100000101543	G100001000273	KR7015760002	0.1	5300		-99	40	80	120
coal	China	Asia	Eastern Asia	Yangcheng power station	Phase III Unit 9	山西阳城发电厂	大唐阳城电厂	1000	announced			ultra-supercritical	anthracite					Yangcheng International Power Generating	China Datang Corp; China Energy Construction Group Co Ltd; Jiangsu Guoxin Investment Group Ltd; KEPCO Shanxi International; KEPCO Woori sprott Global Prive; other; Power Construction Corporation of China; Power Development; Shanxi Gemeng International Energy Group Co Ltd; Shanxi State-Owned Capital Investment and Operation Co Ltd	35.4661	112.574	exact	Beiliu	Yangcheng	Jincheng	Shanxi	https://www.gem.wiki/Yangcheng_power_station	L100000101543	G100001000272	KR7015760002	0.1	5300	5300	-99	40	80	120
coal	South Korea	Asia	Eastern Asia	Yeongheung power station	Unit 1	영흥 발전소	Yonghungdo power station, 영흥 발전소	800	operating	2004	2034	supercritical	bituminous					Korea South-East Power [100%]	Korea Electric Power Corp [100.0%]	37.2365	126.438	exact	Oe	Yeongheung	Ongjin	Incheon	https://www.gem.wiki/Yeongheung_power_station	L100000103466	G100000111357	KR7015760002	1	8420		20	2044	2084	2124
coal	South Korea	Asia	Eastern Asia	Yeongheung power station	Unit 2	영흥 발전소	Yonghungdo power station, 영흥 발전소	800	operating	2004	2034	supercritical	bituminous					Korea South-East Power [100%]	Korea Electric Power Corp [100.0%]	37.2365	126.438	exact	Oe	Yeongheung	Ongjin	Incheon	https://www.gem.wiki/Yeongheung_power_station	L100000103466	G100000111358	KR7015760002	1	8420		20	2044	2084	2124
coal	South Korea	Asia	Eastern Asia	Yeongheung power station	Unit 3	영흥 발전소	Yonghungdo power station, 영흥 발전소	870	operating	2009	2038	ultra-supercritical	bituminous					Korea South-East Power [100%]	Korea Electric Power Corp [100.0%]	37.2365	126.438	exact	Oe	Yeongheung	Ongjin	Incheon	https://www.gem.wiki/Yeongheung_power_station	L100000103466	G100000111359	KR7015760002	1	8420		15	2049	2089	2129
coal	South Korea	Asia	Eastern Asia	Yeongheung power station	Unit 4	영흥 발전소	Yonghungdo power station, 영흥 발전소	870	operating	2009	2038	ultra-supercritical	bituminous					Korea South-East Power [100%]	Korea Electric Power Corp [100.0%]	37.2365	126.438	exact	Oe	Yeongheung	Ongjin	Incheon	https://www.gem.wiki/Yeongheung_power_station	L100000103466	G100000111360	KR7015760002	1	8420		15	2049	2089	2129
coal	South Korea	Asia	Eastern Asia	Yeongheung power station	Unit 5	영흥 발전소	Yonghungdo power station, 영흥 발전소	870	operating	2014	2044	supercritical	bituminous					Korea South-East Power [100%]	Korea Electric Power Corp [100.0%]	37.2369	126.436	exact	Oe	Yeongheung	Ongjin	Incheon	https://www.gem.wiki/Yeongheung_power_station	L100000103466	G100000111361	KR7015760002	1	8420		10	2054	2094	2134
coal	South Korea	Asia	Eastern Asia	Yeongheung power station	Unit 6	영흥 발전소	Yonghungdo power station, 영흥 발전소	870	operating	2014	2044	supercritical	bituminous					Korea South-East Power [100%]	Korea Electric Power Corp [100.0%]	37.2369	126.436	exact	Oe	Yeongheung	Ongjin	Incheon	https://www.gem.wiki/Yeongheung_power_station	L100000103466	G100000111362	KR7015760002	1	8420		10	2054	2094	2134
coal	South Korea	Asia	Eastern Asia	Yeongheung power station	Unit 7	영흥 발전소	Yonghungdo power station, 영흥 발전소	870	cancelled			supercritical	bituminous					Korea South-East Power [100%]	Korea Electric Power Corp [100.0%]	37.2369	126.436	exact	Oe	Yeongheung	Ongjin	Incheon	https://www.gem.wiki/Yeongheung_power_station	L100000103466	G100000111363	KR7015760002	1	8420		-99	40	80	120
coal	South Korea	Asia	Eastern Asia	Yeongheung power station	Unit 8	영흥 발전소	Yonghungdo power station, 영흥 발전소	870	cancelled			supercritical	bituminous					Korea South-East Power [100%]	Korea Electric Power Corp [100.0%]	37.2369	126.436	exact	Oe	Yeongheung	Ongjin	Incheon	https://www.gem.wiki/Yeongheung_power_station	L100000103466	G100000111364	KR7015760002	1	8420	8420	-99	40	80	120
coal	South Korea	Asia	Eastern Asia	Yeosu power station	Unit 2 rebuild	여수 발전소	Yosu power station, 여수 발전소	329	operating	2011	2041	subcritical	bituminous					Korea South-East Power [100%]	Korea Electric Power Corp [100.0%]	34.8393	127.691	exact		Jungheung	Yeosu	North Jeolla	https://www.gem.wiki/Yeosu_power_station	L100000103476	G100000111368	KR7015760002	1	679		13	2051	2091	2131
coal	South Korea	Asia	Eastern Asia	Yeosu power station	Unit 1 rebuild	여수 발전소	Yosu power station, 여수 발전소	350	operating	2016	2046	unknown	bituminous					Korea South-East Power [100%]	Korea Electric Power Corp [100.0%]	34.8393	127.691	exact		Jungheung	Yeosu	North Jeolla	https://www.gem.wiki/Yeosu_power_station	L100000103476	G100000111367	KR7015760002	1	679	679	8	2056	2096	2136
coal	South Korea	Asia	Eastern Asia	Yongdong power station	Unit 1	영동 발전소	Yeongdong power station, 영동 발전소	125	retired	1973	2017	subcritical	anthracite					Korea South-East Power [100%]	Korea Electric Power Corp [100.0%]	37.739	128.98	exact	Anin	Gangdong	Gangneung	Gangwon	https://www.gem.wiki/Yongdong_power_station	L100000103464	G100000111437	KR7015760002	1	325		51	2013	2053	2093
coal	South Korea	Asia	Eastern Asia	Yongdong power station	Unit 2	영동 발전소	Yeongdong power station, 영동 발전소	200	retired	1979	2020	subcritical	anthracite					Korea South-East Power [100%]	Korea Electric Power Corp [100.0%]	37.739	128.98	exact	Anin	Gangdong	Gangneung	Gangwon	https://www.gem.wiki/Yongdong_power_station	L100000103464	G100000111438	KR7015760002	1	325	325	45	2019	2059	2099
coal	China	Asia	Eastern Asia	Youyu power station	Unit 1	京能京玉发电厂	京能右玉发电厂一期	330	operating	2011		subcritical	unknown					Shanxi Jingyu Power Generation [100%]	Beijing Jingneng Power Co Ltd [51.0%]; Shanxi State-Owned Capital Investment and Operation Co Ltd [20.7%]; KEPCO Shanxi International [16.7%]; KEPCO Woori sprott Global Prive [3.9%]; Power Development [3.4%]; Shanxi Gemeng International Energy Group Co Ltd [2.3%]; other [2.0%]	39.8661	112.512	exact	Baitouli Town Yejia Villege	Youyu	Shuozhou	Shanxi	https://www.gem.wiki/Youyu_power_station	L100000101548	G100000111447	KR7015760002	0.167	660		13	2051	2091	2131
coal	China	Asia	Eastern Asia	Youyu power station	Unit 2	京能京玉发电厂	京能右玉发电厂一期	330	operating	2012		subcritical	unknown					Shanxi Jingyu Power Generation [100%]	Beijing Jingneng Power Co Ltd [51.0%]; Shanxi State-Owned Capital Investment and Operation Co Ltd [20.7%]; KEPCO Shanxi International [16.7%]; KEPCO Woori sprott Global Prive [3.9%]; Power Development [3.4%]; Shanxi Gemeng International Energy Group Co Ltd [2.3%]; other [2.0%]	39.8661	112.512	exact	Baitouli Town Yejia Villege	Youyu	Shuozhou	Shanxi	https://www.gem.wiki/Youyu_power_station	L100000101548	G100000111448	KR7015760002	0.167	660	660	12	2052	2092	2132
coal	China	Asia	Eastern Asia	Yuguang Coal power station	Unit 1	山西国际能源裕光煤电盂县电厂		1000	operating	2021		ultra-supercritical	unknown					Shanxi International Energy Yuguang Coal Power [100%]	Beijing State-owned Capital Management Center [24.0%]; Shanxi State-Owned Capital Investment and Operation Co Ltd [21.6%]; Hebei Construction Investment Energy Investment Co Ltd [20.0%]; KEPCO Shanxi International [17.3%]; Yuxian State Owned Capital Operation Co Ltd [4.5%]; KEPCO Woori sprott Global Prive [4.1%]; Power Development [3.6%]; Shanxi Gemeng International Energy Group Co Ltd [2.4%]; ot…	38.0781	113.483	exact	Niucun Town	Yu	Yangquan	Shanxi	https://www.gem.wiki/Yuguang_Coal_power_station	L100000101551	G100000111465	KR7015760002	0.173	2000		3	2061	2101	2141
coal	China	Asia	Eastern Asia	Yuguang Coal power station	Unit 2	山西国际能源裕光煤电盂县电厂		1000	operating	2021		ultra-supercritical	unknown					Shanxi International Energy Yuguang Coal Power [100%]	Beijing State-owned Capital Management Center [24.0%]; Shanxi State-Owned Capital Investment and Operation Co Ltd [21.6%]; Hebei Construction Investment Energy Investment Co Ltd [20.0%]; KEPCO Shanxi International [17.3%]; Yuxian State Owned Capital Operation Co Ltd [4.5%]; KEPCO Woori sprott Global Prive [4.1%]; Power Development [3.6%]; Shanxi Gemeng International Energy Group Co Ltd [2.4%]; ot…	38.0781	113.483	exact	Niucun Town	Yu	Yangquan	Shanxi	https://www.gem.wiki/Yuguang_Coal_power_station	L100000101551	G100000111466	KR7015760002	0.173	2000	2000	3	2061	2101	2141
oil/gas	Jordan	Asia	Western Asia	Al Qatrana power plant	1	محطة القطرانة الكهربائية	Al Qatrana CCGT Power Plant Jordan	373	operating	2012		CC	NG/D					Qatrana Electric Power Company PSC [100.0%]	Korea Electric Power Corp [80.0%]; XENEL Industries Ltd [20.0%]	31.2226	36.0197	exact	Qatraneh			Karak	https://www.gem.wiki/Al_Qatrana_power_plant	L100000405486	G100000404602	KR7015760002	0.8	373	373	12	2052	2092	2132
oil/gas	South Korea	Asia	Eastern Asia	Andong power station	1	안동C/C		417	operating	2014		CC	LNG					Korea Southern Power Co Ltd [100.0%]	Korea Electric Power Corp [100.0%]	36.5959	128.541	exact	Andong			Gyeongsangbuk-do	https://www.gem.wiki/Andong_power_station	L100000401350	G100000401351	KR7015760002	1	417	417	10	2054	2094	2134
oil/gas	South Korea	Asia	Eastern Asia	Ansan power station	1	안산C/C		834	operating	2014		CC	LNG					S-Power [100.0%]	Korea Electric Power Corp; POSCO Holdings Inc; Samchully Co Ltd	37.2952	126.779	exact	Ansan-si			Gyeonggi-do	https://www.gem.wiki/Ansan_power_station	L100000401351	G100000401352	KR7015760002	0.333333	834	834	10	2054	2094	2134
oil/gas	Jamaica	Americas	Latin America and the Caribbean	Bogue power station	1			120	operating	2003		CC	LNG/D					Jamaica Public Service Co Ltd [100%]	Korea Electric Power Corp [40.0%]; Marubeni Corp [40.0%]; Development Bank of Jamaica [19.9%]; other [0.1%]	18.4521	-77.9183	exact	Montego Bay		St James	Cornwall	https://gem.wiki/Bogue_power_station	L100000406600	G100000406671	KR7015760002	0.4	120	120	21	2043	2083	2123
oil/gas	South Korea	Asia	Eastern Asia	Boryeong power station	CC1	보령C/C	Poryong	450	operating	2002		CC	LNG					Korea Midland Power Co Ltd [100.0%]	Korea Electric Power Corp [100.0%]	36.4009	126.491	exact	Boryeong-si			Chungcheongnam-do	https://www.gem.wiki/Boryeong_power_station	L100000103477	G100000401387	KR7015760002	1	6400		22	2042	2082	2122
oil/gas	South Korea	Asia	Eastern Asia	Boryeong power station	CC2	보령C/C	Poryong	450	operating	2002		CC	LNG					Korea Midland Power Co Ltd [100.0%]	Korea Electric Power Corp [100.0%]	36.4009	126.491	exact	Boryeong-si			Chungcheongnam-do	https://www.gem.wiki/Boryeong_power_station	L100000103477	G100000401388	KR7015760002	1	6400		22	2042	2082	2122
oil/gas	South Korea	Asia	Eastern Asia	Boryeong power station	CC3	보령C/C	Poryong	450	operating	2002		CC	LNG					Korea Midland Power Co Ltd [100.0%]	Korea Electric Power Corp [100.0%]	36.4009	126.491	exact	Boryeong-si			Chungcheongnam-do	https://www.gem.wiki/Boryeong_power_station	L100000103477	G100000401389	KR7015760002	1	6400		22	2042	2082	2122
oil/gas	South Korea	Asia	Eastern Asia	Boryeong power station	CC5	보령C/C	Poryong	500	pre-construction	2025		not found	LNG					Korea Midland Power Co Ltd [100.0%]	Korea Electric Power Corp [100.0%]	36.4009	126.491	exact	Boryeong-si			Chungcheongnam-do	https://www.gem.wiki/Boryeong_power_station	L100000103477	G100000406128	KR7015760002	1	6400		-1	2065	2105	2145
oil/gas	South Korea	Asia	Eastern Asia	Boryeong power station	CC6	보령C/C	Poryong	500	announced	2025		not found	LNG					Korea Midland Power Co Ltd [100.0%]	Korea Electric Power Corp [100.0%]	36.4009	126.491	exact	Boryeong-si			Chungcheongnam-do	https://www.gem.wiki/Boryeong_power_station	L100000103477	G100000406129	KR7015760002	1	6400	6400	-1	2065	2105	2145
oil/gas	South Korea	Asia	Eastern Asia	Bundang power station	1	분당C/C		574	operating	1993		CC	LNG					Korea South-East Power Co Ltd [100.0%]	Korea Electric Power Corp [100.0%]	37.3642	127.148	exact	Seongnam-si			Gyeonggi-do	https://www.gem.wiki/Bundang_power_station	L100000401353	G100000401354	KR7015760002	1	922		31	2033	2073	2113
oil/gas	South Korea	Asia	Eastern Asia	Bundang power station	2	분당C/C		348	operating	1997		CC	LNG					Korea South-East Power Co Ltd [100.0%]	Korea Electric Power Corp [100.0%]	37.3642	127.148	exact	Seongnam-si			Gyeonggi-do	https://www.gem.wiki/Bundang_power_station	L100000401353	G100000401355	KR7015760002	1	922	922	27	2037	2077	2117
oil/gas	South Korea	Asia	Eastern Asia	Busan power station	1	부산C/C	Pusan	450	operating	2001		CC	LNG					Korea Southern Power Co Ltd [100.0%]	Korea Electric Power Corp [100.0%]	35.0851	129	exact	Busan-si			Busan	https://www.gem.wiki/Busan_power_station	L100000401355	G100000401356	KR7015760002	1	1800		23	2041	2081	2121
oil/gas	South Korea	Asia	Eastern Asia	Busan power station	2	부산C/C	Pusan	450	operating	2002		CC	LNG					Korea Southern Power Co Ltd [100.0%]	Korea Electric Power Corp [100.0%]	35.0851	129	exact	Busan-si			Busan	https://www.gem.wiki/Busan_power_station	L100000401355	G100000401357	KR7015760002	1	1800		22	2042	2082	2122
oil/gas	South Korea	Asia	Eastern Asia	Busan power station	3	부산C/C	Pusan	450	operating	2003		CC	LNG					Korea Southern Power Co Ltd [100.0%]	Korea Electric Power Corp [100.0%]	35.0851	129	exact	Busan-si			Busan	https://www.gem.wiki/Busan_power_station	L100000401355	G100000401358	KR7015760002	1	1800		21	2043	2083	2123
oil/gas	South Korea	Asia	Eastern Asia	Busan power station	4	부산C/C	Pusan	450	operating	2004		CC	LNG					Korea Southern Power Co Ltd [100.0%]	Korea Electric Power Corp [100.0%]	35.0851	129	exact	Busan-si			Busan	https://www.gem.wiki/Busan_power_station	L100000401355	G100000401359	KR7015760002	1	1800	1800	20	2044	2084	2124
oil/gas	South Korea	Asia	Eastern Asia	Chuncheon CHP power station	1			470	operating	2017		CC	LNG					Hanjin Heavy Industries [40.0%]; Korea East-West Power Co Ltd [29.9%]; POSCO Holdings Inc [29.9%]	Korea Electric Power Corp [29.9%]; POSCO Holdings Inc [29.9%]	37.8759	127.71	approximate	Chuncheon			Gangwon-do	https://www.gem.wiki/Chuncheon_CHP_power_station	L100000406311	G100000406131	KR7015760002	0.299	470	470	7	2057	2097	2137
oil/gas	South Korea	Asia	Eastern Asia	Daegu CHP power station	1	대구그린파워	Daegu Innovation City CHPP/Daegugreenpower	415	operating	2014		CC	LNG					Daegu Green Power Co Ltd [100.0%]	NongHyup Bank [46.5%]; Korea Electric Power Corp [29.0%]; Lotte E&C [19.9%]	35.8747	128.612	approximate	Daegu				https://www.gem.wiki/Daegu_CHP_power_station	L100000406312	G100000406132	KR7015760002	0.29	415	415	10	2054	2094	2134
oil/gas	South Korea	Asia	Eastern Asia	Dongducheon power station	1	동두천C/C		858	operating	2015		CC	LNG					Dongducheon Dream Power Co Ltd [100.0%]	Korea Electric Power Corp [33.6%]; Samsung C&T Corp [31.5%]; HDC Hyundai Development Co [31.0%]	37.903	127.09	exact	Dongducheon-si			Gyeonggi-do	https://www.gem.wiki/Dongducheon_power_station	L100000401365	G100000401366	KR7015760002	0.336	1716		9	2055	2095	2135
oil/gas	South Korea	Asia	Eastern Asia	Dongducheon power station	2	동두천C/C		858	operating	2015		CC	LNG					Dongducheon Dream Power Co Ltd [100.0%]	Korea Electric Power Corp [33.6%]; Samsung C&T Corp [31.5%]; HDC Hyundai Development Co [31.0%]	37.903	127.09	exact	Dongducheon-si			Gyeonggi-do	https://www.gem.wiki/Dongducheon_power_station	L100000401365	G100000401367	KR7015760002	0.336	1716	1716	9	2055	2095	2135
oil/gas	Nigeria	Africa	Sub-Saharan Africa	Egbin power station	1			220	operating	1985		ST	NG					Egbin Power PLC [100.0%]	KEPCO Energy Resources Ltd [70.0%]; Bureau of Public Enterprises (Nigeria) [24.0%]; Ministry of Finance Incorporated (Nigeria) [6.0%]	6.56371	3.61508	exact	Ijede			Lagos	https://www.gem.wiki/Egbin_power_station	L100000406784	G100000407164	KR7015760002	0.7	3120		39	2025	2065	2105
oil/gas	Nigeria	Africa	Sub-Saharan Africa	Egbin power station	2			220	operating	1985		ST	NG					Egbin Power PLC [100.0%]	KEPCO Energy Resources Ltd [70.0%]; Bureau of Public Enterprises (Nigeria) [24.0%]; Ministry of Finance Incorporated (Nigeria) [6.0%]	6.56371	3.61508	exact	Ijede			Lagos	https://www.gem.wiki/Egbin_power_station	L100000406784	G100000407165	KR7015760002	0.7	3120		39	2025	2065	2105
oil/gas	Nigeria	Africa	Sub-Saharan Africa	Egbin power station	3			220	operating	1985		ST	NG					Egbin Power PLC [100.0%]	KEPCO Energy Resources Ltd [70.0%]; Bureau of Public Enterprises (Nigeria) [24.0%]; Ministry of Finance Incorporated (Nigeria) [6.0%]	6.56371	3.61508	exact	Ijede			Lagos	https://www.gem.wiki/Egbin_power_station	L100000406784	G100000407166	KR7015760002	0.7	3120		39	2025	2065	2105
oil/gas	Nigeria	Africa	Sub-Saharan Africa	Egbin power station	4			220	operating	1985		ST	NG					Egbin Power PLC [100.0%]	KEPCO Energy Resources Ltd [70.0%]; Bureau of Public Enterprises (Nigeria) [24.0%]; Ministry of Finance Incorporated (Nigeria) [6.0%]	6.56371	3.61508	exact	Ijede			Lagos	https://www.gem.wiki/Egbin_power_station	L100000406784	G100000407167	KR7015760002	0.7	3120		39	2025	2065	2105
oil/gas	Nigeria	Africa	Sub-Saharan Africa	Egbin power station	5			220	operating	1985		ST	NG					Egbin Power PLC [100.0%]	KEPCO Energy Resources Ltd [70.0%]; Bureau of Public Enterprises (Nigeria) [24.0%]; Ministry of Finance Incorporated (Nigeria) [6.0%]	6.56371	3.61508	exact	Ijede			Lagos	https://www.gem.wiki/Egbin_power_station	L100000406784	G100000407168	KR7015760002	0.7	3120		39	2025	2065	2105
oil/gas	Nigeria	Africa	Sub-Saharan Africa	Egbin power station	6			220	operating	1985		ST	NG					Egbin Power PLC [100.0%]	KEPCO Energy Resources Ltd [70.0%]; Bureau of Public Enterprises (Nigeria) [24.0%]; Ministry of Finance Incorporated (Nigeria) [6.0%]	6.56371	3.61508	exact	Ijede			Lagos	https://www.gem.wiki/Egbin_power_station	L100000406784	G100000407169	KR7015760002	0.7	3120		39	2025	2065	2105
oil/gas	Nigeria	Africa	Sub-Saharan Africa	Egbin power station	B			1800	announced	2025		GT	LNG					Egbin Power PLC [100.0%]	KEPCO Energy Resources Ltd [70.0%]; Bureau of Public Enterprises (Nigeria) [24.0%]; Ministry of Finance Incorporated (Nigeria) [6.0%]	6.56371	3.61508	exact	Ijede			Lagos	https://www.gem.wiki/Egbin_power_station	L100000406784	G100000407170	KR7015760002	0.7	3120	3120	-1	2065	2105	2145
oil/gas	South Korea	Asia	Eastern Asia	Eumseong power station	CC1			561	construction	2026		CC	LNG/LPG					Korea East-West Power Co Ltd [100.0%]	Korea Electric Power Corp [100.0%]	36.9418	127.655	approximate	Eumseong-eup		Eumseong-gun	Chungcheongbuk-do	https://www.gem.wiki/Eumseong_power_station	L100000401363	G100000401364	KR7015760002	1	1122		-2	2066	2106	2146
oil/gas	South Korea	Asia	Eastern Asia	Eumseong power station	CC2			561	construction	2026		CC	LNG					Korea East-West Power Co Ltd [100.0%]	Korea Electric Power Corp [100.0%]	36.9418	127.655	approximate	Eumseong-eup		Eumseong-gun	Chungcheongbuk-do	https://www.gem.wiki/Eumseong_power_station	L100000401363	G100000412629	KR7015760002	1	1122	1122	-2	2066	2106	2146
oil/gas	South Korea	Asia	Eastern Asia	Gimpo CHP power station	1			270	operating	2023		GT	LNG					Korea Western Power Co Ltd [100.0%]	Korea Electric Power Corp [100.0%]	37.6498	126.638	approximate	Gimpo			Gyeonggi-do	https://www.gem.wiki/Gimpo_CHP_power_station	L100000406314	G100000406135	KR7015760002	1	495		1	2063	2103	2143
oil/gas	South Korea	Asia	Eastern Asia	Gimpo CHP power station	2			225	construction	2025		ST	LNG					Korea Western Power Co Ltd [100.0%]	Korea Electric Power Corp [100.0%]	37.6498	126.638	approximate	Gimpo			Gyeonggi-do	https://www.gem.wiki/Gimpo_CHP_power_station	L100000406314	G100000412628	KR7015760002	1	495	495	-1	2065	2105	2145
oil/gas	South Korea	Asia	Eastern Asia	Gumi Combined Cycle power plant	1			501	construction	2025		CC	LNG					Korea Western Power Co Ltd [100.0%]	Korea Electric Power Corp [100.0%]	36.2073	128.356	approximate	Haepyeong-myeon - Gumi-si			Gyeongsangbuk-do	https://www.gem.wiki/Gumi_Combined_Cycle_power_plant	L100000407738	G100000410206	KR7015760002	1	501	501	-1	2065	2105	2145
oil/gas	South Korea	Asia	Eastern Asia	Gunsan CC power station	1	군산C/C		718	operating	2010		CC	LNG					Korea Western Power Co Ltd [100.0%]	Korea Electric Power Corp [100.0%]	35.9836	126.731	exact	Gunsan-si			Jeollabuk-do	https://www.gem.wiki/Gunsan_CC_power_station	L100000401367	G100000401368	KR7015760002	1	718	718	14	2050	2090	2130
oil/gas	South Korea	Asia	Eastern Asia	Hadong power station	1			500	announced	2026		not found	LNG					Korea Southern Power Co Ltd [100.0%]	Korea Electric Power Corp [100.0%]	34.9524	127.82	exact	Gyeongjesaneop	Geumseong	Hadong	Gyeongsangnam-do	https://www.gem.wiki/Hadong_power_station	L100000103485	G100000406138	KR7015760002	1	7000		-2	2066	2106	2146
oil/gas	South Korea	Asia	Eastern Asia	Hadong power station	2			500	announced	2027		not found	LNG					Korea Southern Power Co Ltd [100.0%]	Korea Electric Power Corp [100.0%]	34.9524	127.82	exact	Gyeongjesaneop	Geumseong	Hadong	Gyeongsangnam-do	https://www.gem.wiki/Hadong_power_station	L100000103485	G100000406139	KR7015760002	1	7000		-3	2067	2107	2147
oil/gas	South Korea	Asia	Eastern Asia	Hadong power station	3			500	announced	2028		not found	LNG					Korea Southern Power Co Ltd [100.0%]	Korea Electric Power Corp [100.0%]	34.9524	127.82	exact	Gyeongjesaneop	Geumseong	Hadong	Gyeongsangnam-do	https://www.gem.wiki/Hadong_power_station	L100000103485	G100000406140	KR7015760002	1	7000		-4	2068	2108	2148
oil/gas	South Korea	Asia	Eastern Asia	Hadong power station	4			500	announced	2028		not found	LNG					Korea Southern Power Co Ltd [100.0%]	Korea Electric Power Corp [100.0%]	34.9524	127.82	exact	Gyeongjesaneop	Geumseong	Hadong	Gyeongsangnam-do	https://www.gem.wiki/Hadong_power_station	L100000103485	G100000406141	KR7015760002	1	7000		-4	2068	2108	2148
oil/gas	South Korea	Asia	Eastern Asia	Hadong power station	5			500	announced	2031		not found	LNG					Korea Southern Power Co Ltd [100.0%]	Korea Electric Power Corp [100.0%]	34.9524	127.82	exact	Gyeongjesaneop	Geumseong	Hadong	Gyeongsangnam-do	https://www.gem.wiki/Hadong_power_station	L100000103485	G100000406142	KR7015760002	1	7000		-7	2071	2111	2151
oil/gas	South Korea	Asia	Eastern Asia	Hadong power station	6			500	announced	2031		not found	LNG					Korea Southern Power Co Ltd [100.0%]	Korea Electric Power Corp [100.0%]	34.9524	127.82	exact	Gyeongjesaneop	Geumseong	Hadong	Gyeongsangnam-do	https://www.gem.wiki/Hadong_power_station	L100000103485	G100000406143	KR7015760002	1	7000	7000	-7	2071	2111	2151
oil/gas	Vietnam	Asia	South-eastern Asia	Hai Lang power station	1-1			1500	announced	2030		CC	LNG					Korea Gas Corp; Korea Southern Power Co Ltd; T&T Group JSC	Korea Electric Power Corp; Korea Gas Corp; T&T Group JSC	16.9944	107.115	approximate	not found			Quảng Trị	https://www.gem.wiki/Hai_Lang_power_station	L100000405976	G100000405995	KR7015760002	0.333333	3000		-6	2070	2110	2150
oil/gas	Vietnam	Asia	South-eastern Asia	Hai Lang power station	1-2			1500	cancelled			CC	LNG					Korea Gas Corp; Korea Southern Power Co Ltd; T&T Group JSC	Korea Electric Power Corp; Korea Gas Corp; T&T Group JSC	16.9944	107.115	approximate	not found			Quảng Trị	https://www.gem.wiki/Hai_Lang_power_station	L100000405976	G100000405996	KR7015760002	0.333333	3000	3000	-99	40	80	120
oil/gas	South Korea	Asia	Eastern Asia	Hallim Complex power station	1	한림복합	Hanlim	105	operating	1997		CC	LNG					Korea Southern Power Co Ltd [100.0%]	Korea Electric Power Corp [100.0%]	33.4028	126.272	exact	Hallim		Jeju-si	Jeju-do	https://www.gem.wiki/Hallim_Complex_power_station	L100000408494	G100000412627	KR7015760002	1	105	105	27	2037	2077	2117
oil/gas	Jamaica	Americas	Latin America and the Caribbean	Hunts Bay power station	1			143	announced	2027		CC	LNG					Jamaica Public Service Co Ltd [100%]	Korea Electric Power Corp [40.0%]; Marubeni Corp [40.0%]; Development Bank of Jamaica [19.9%]; other [0.1%]	17.9718	-76.81	exact	Kingston			Surrey	https://gem.wiki/Hunts_Bay_power_station	L100000407910	G100000411248	KR7015760002	0.4	143	143	-3	2067	2107	2147
oil/gas	South Korea	Asia	Eastern Asia	Ilsan power station	1			630	operating	1993		CC	LNG					Korea East-West Power Co Ltd [100.0%]	Korea Electric Power Corp [100.0%]	37.6479	126.797	exact	Goyang			Gyeonggi-do	https://www.gem.wiki/Ilsan_power_station	L100000406319	G100000406146	KR7015760002	1	930		31	2033	2073	2113
oil/gas	South Korea	Asia	Eastern Asia	Ilsan power station	2			300	operating	1996		CC	LNG					Korea East-West Power Co Ltd [100.0%]	Korea Electric Power Corp [100.0%]	37.6479	126.797	exact	Goyang			Gyeonggi-do	https://www.gem.wiki/Ilsan_power_station	L100000406319	G100000406147	KR7015760002	1	930	930	28	2036	2076	2116
oil/gas	United States	Americas	Northern America	Indeck Niles energy center	CC_set			1174	operating	2022		CC	NG					KOSPO USA [50.0%]; DL-Energy [30.0%]; Indeck Energy Services Inc [20.0%]	Korea Electric Power Corp [50.0%]; DL Holdings [21.0%]; Daelim co.,Ltd [9.0%]	41.8621	-86.2214	exact	Niles	Cass		Michigan	https://www.gem.wiki/Indeck_Niles_energy_center	L100000402411	G100000401930	KR7015760002	0.5	1174	1174	2	2062	2102	2142
oil/gas	Jordan	Asia	Western Asia	IPP3 ICE power plant	1			573.8	operating	2015		IC	NG/FO/D					Amman Asia Electric Power Company PSC [100.0%]	Korea Electric Power Corp [60.0%]; Mitsubishi Corp; Wärtsilä Oyj	31.9552	35.945	approximate	Amman			Amman	https://www.gem.wiki/IPP3_ICE_power_plant	L100000408212	G100000411581	KR7015760002	0.5	573.8	573.8	9	2055	2095	2135
oil/gas	South Korea	Asia	Eastern Asia	Jeju thermal power station	CC1		Bukjeju	114	operating	2018		CC	LNG					Korea Midland Power Co Ltd [100.0%]	Korea Electric Power Corp [100.0%]	33.5345	126.593	exact	Jeju-si			Jeju-do	https://www.gem.wiki/Jeju_thermal_power_station	L100000401414	G100000401415	KR7015760002	1	228		6	2058	2098	2138
oil/gas	South Korea	Asia	Eastern Asia	Jeju thermal power station	CC2		Bukjeju	114	operating	2018		CC	LNG					Korea Midland Power Co Ltd [100.0%]	Korea Electric Power Corp [100.0%]	33.5345	126.593	exact	Jeju-si			Jeju-do	https://www.gem.wiki/Jeju_thermal_power_station	L100000401414	G100000401416	KR7015760002	1	228	228	6	2058	2098	2138
oil/gas	South Korea	Asia	Eastern Asia	KOMIPO Incheon power station	1	인천C/C		504	operating	2005		CC	LNG					Korea Midland Power Co Ltd [100.0%]	Korea Electric Power Corp [100.0%]	37.5109	126.609	exact	Incheon-si			Incheon	https://www.gem.wiki/KOMIPO_Incheon_power_station	L100000401370	G100000401371	KR7015760002	1	1463		19	2045	2085	2125
oil/gas	South Korea	Asia	Eastern Asia	KOMIPO Incheon power station	2	인천C/C		509	operating	2009		CC	LNG					Korea Midland Power Co Ltd [100.0%]	Korea Electric Power Corp [100.0%]	37.5109	126.609	exact	Incheon-si			Incheon	https://www.gem.wiki/KOMIPO_Incheon_power_station	L100000401370	G100000401372	KR7015760002	1	1463		15	2049	2089	2129
oil/gas	South Korea	Asia	Eastern Asia	KOMIPO Incheon power station	3	인천C/C		450	operating	2012		CC	LNG					Korea Midland Power Co Ltd [100.0%]	Korea Electric Power Corp [100.0%]	37.5109	126.609	exact	Incheon-si			Incheon	https://www.gem.wiki/KOMIPO_Incheon_power_station	L100000401370	G100000401373	KR7015760002	1	1463	1463	12	2052	2092	2132
oil/gas	Angola	Africa	Sub-Saharan Africa	Lobito power station	1-1		Benguela	375	pre-construction	2027		CC	NG					Beltec Engenharia e Serviços [25.0%]; Busan Korea Biotechnology (BKB) [25.0%]; Hyundai Engineering Co Ltd [25.0%]; Korea Southern Power Co Ltd [25.0%]	Hyundai Motor Group [25.0%]; Korea Electric Power Corp [25.0%]	-12.3665	13.5328	approximate	Lobito			Benguela	https://www.gem.wiki/Lobito_power_station	L100000406735	G100000407060	KR7015760002	0.25	750		-3	2067	2107	2147
oil/gas	Angola	Africa	Sub-Saharan Africa	Lobito power station	1-2		Benguela	375	pre-construction	2029		CC	NG					Beltec Engenharia e Serviços [25.0%]; Busan Korea Biotechnology (BKB) [25.0%]; Hyundai Engineering Co Ltd [25.0%]; Korea Southern Power Co Ltd [25.0%]	Hyundai Motor Group [25.0%]; Korea Electric Power Corp [25.0%]	-12.3665	13.5328	approximate	Lobito			Benguela	https://www.gem.wiki/Lobito_power_station	L100000406735	G100000407061	KR7015760002	0.25	750	750	-5	2069	2109	2149
oil/gas	India	Asia	Southern Asia	Mangaon Combined Cycle power plant	1			388	operating	2016		CC	NG					Pioneer Gas Power Ltd [100.0%]	Korea Electric Power Corp [38.5%]	18.3879	73.3529	exact	Bhagad			Maharashtra	https://www.gem.wiki/Mangaon_Combined_Cycle_power_plant	L100000401488	G100000401458	KR7015760002	0.385	388	388	8	2056	2096	2136
oil/gas	South Korea	Asia	Eastern Asia	Naepo Green Energy power station	1			500	operating	2023		CC	NG					Naepo Green Energy Co Ltd [100.0%]	other [70.8%]; Korea Electric Power Corp [29.2%]	36.6549	126.677	approximate	Naepo			Chungcheongnam-do	https://www.gem.wiki/Naepo_Green_Energy_power_station	L100000406320	G100000406148	KR7015760002	0.292	500	500	1	2063	2103	2143
oil/gas	South Korea	Asia	Eastern Asia	Namjeju Power Complex	1	남제주복합	KOSPO Namjeju Power Plant	150	operating	2020		CC	LNG					Korea Southern Power Co Ltd [100.0%]	Korea Electric Power Corp [100.0%]	33.2368	126.34	exact	Seogwipo			Jeju-do	https://www.gem.wiki/Namjeju_Power_Complex	L100000406380	G100000406294	KR7015760002	1	296.24		4	2060	2100	2140
oil/gas	South Korea	Asia	Eastern Asia	Namjeju Power Complex	2	남제주복합	KOSPO Namjeju Power Plant	146.24	operating	2020		CC	LNG					Korea Southern Power Co Ltd [100.0%]	Korea Electric Power Corp [100.0%]	33.2368	126.34	exact	Seogwipo			Jeju-do	https://www.gem.wiki/Namjeju_Power_Complex	L100000406380	G100000412623	KR7015760002	1	296.24	296.24	4	2060	2100	2140
oil/gas	Mexico	Americas	Latin America and the Caribbean	Norte II power station	1	Central CC Norte II	KST/El Encino	433	operating	2014		CC	NG					KST Electric Power Company SAPI de CV [100%]	Korea Electric Power Corp [56.0%]; Samsung C&T Corp [34.0%]; Techint SA de CV [10.0%]	28.4422	-105.918	exact	Chihuahua			Chihuahua	https://gem.wiki/Norte_II_power_station	L100000406237	G100000406382	KR7015760002	0.56	433	433	10	2054	2094	2134
oil/gas	Malaysia	Asia	South-eastern Asia	Palua Indah power station	1			600	construction	2024		CC	NG					Worldwide Holdings Bhd [75.0%]; Korea Electric Power Corp [25.0%]	Perbadanan Kemajuan Negeri Selangor [75.0%]; Korea Electric Power Corp [25.0%]	2.94022	101.262	approximate	Pulau Indah			Selangor	https://www.gem.wiki/Palua_Indah_power_station	L100000405308	G100000404367	KR7015760002	0.25	1200		0	2064	2104	2144
oil/gas	Malaysia	Asia	South-eastern Asia	Palua Indah power station	2			600	construction	2024		CC	NG					Worldwide Holdings Bhd [75.0%]; Korea Electric Power Corp [25.0%]	Perbadanan Kemajuan Negeri Selangor [75.0%]; Korea Electric Power Corp [25.0%]	2.94022	101.262	approximate	Pulau Indah			Selangor	https://www.gem.wiki/Palua_Indah_power_station	L100000405308	G100000404368	KR7015760002	0.25	1200	1200	0	2064	2104	2144
oil/gas	South Korea	Asia	Eastern Asia	Pyeongtaek power station	1			350	operating	1980		ST	LNG					Korea Western Power Co Ltd [100.0%]	Korea Electric Power Corp [100.0%]	37.0058	126.798	exact	Pyeongtaek			Gyeonggi-do	https://www.gem.wiki/Pyeongtaek_power_station	L100000401389	G100000406153	KR7015760002	1	2268		44	2020	2060	2100
oil/gas	South Korea	Asia	Eastern Asia	Pyeongtaek power station	2			350	operating	1980		ST	LNG					Korea Western Power Co Ltd [100.0%]	Korea Electric Power Corp [100.0%]	37.0058	126.798	exact	Pyeongtaek			Gyeonggi-do	https://www.gem.wiki/Pyeongtaek_power_station	L100000401389	G100000412620	KR7015760002	1	2268		44	2020	2060	2100
oil/gas	South Korea	Asia	Eastern Asia	Pyeongtaek power station	3			350	operating	1983		ST	LNG					Korea Western Power Co Ltd [100.0%]	Korea Electric Power Corp [100.0%]	37.0058	126.798	exact	Pyeongtaek			Gyeonggi-do	https://www.gem.wiki/Pyeongtaek_power_station	L100000401389	G100000412619	KR7015760002	1	2268		41	2023	2063	2103
oil/gas	South Korea	Asia	Eastern Asia	Pyeongtaek power station	4			350	operating	1983		ST	LNG					Korea Western Power Co Ltd [100.0%]	Korea Electric Power Corp [100.0%]	37.0058	126.798	exact	Pyeongtaek			Gyeonggi-do	https://www.gem.wiki/Pyeongtaek_power_station	L100000401389	G100000412618	KR7015760002	1	2268		41	2023	2063	2103
oil/gas	South Korea	Asia	Eastern Asia	Pyeongtaek power station	CC2			868	operating	2014		CC	LNG					Korea Western Power Co Ltd [100.0%]	Korea Electric Power Corp [100.0%]	37.0058	126.798	exact	Pyeongtaek			Gyeonggi-do	https://www.gem.wiki/Pyeongtaek_power_station	L100000401389	G100000401390	KR7015760002	1	2268	2268	10	2054	2094	2134
oil/gas	South Korea	Asia	Eastern Asia	Samchonpo power station	CC3		Samcheonpo power station	560	announced	2026		not found	LNG					Korea South-East Power Co Ltd [100.0%]	Korea Electric Power Corp [100.0%]	34.9062	128.103	exact	Deokho	Hai	Goseong	Gyeongsangnam-do	https://www.gem.wiki/Samchonpo_power_station	L100000103487	G100000406154	KR7015760002	1	5360		-2	2066	2106	2146
oil/gas	South Korea	Asia	Eastern Asia	Samchonpo power station	CC4		Samcheonpo power station	560	announced	2026		not found	LNG					Korea South-East Power Co Ltd [100.0%]	Korea Electric Power Corp [100.0%]	34.9062	128.103	exact	Deokho	Hai	Goseong	Gyeongsangnam-do	https://www.gem.wiki/Samchonpo_power_station	L100000103487	G100000406155	KR7015760002	1	5360		-2	2066	2106	2146
oil/gas	South Korea	Asia	Eastern Asia	Samchonpo power station	CC5		Samcheonpo power station	500	announced	2027		not found	LNG					Korea South-East Power Co Ltd [100.0%]	Korea Electric Power Corp [100.0%]	34.9062	128.103	exact	Deokho	Hai	Goseong	Gyeongsangnam-do	https://www.gem.wiki/Samchonpo_power_station	L100000103487	G100000406156	KR7015760002	1	5360		-3	2067	2107	2147
oil/gas	South Korea	Asia	Eastern Asia	Samchonpo power station	CC6		Samcheonpo power station	500	announced	2028		not found	LNG					Korea South-East Power Co Ltd [100.0%]	Korea Electric Power Corp [100.0%]	34.9062	128.103	exact	Deokho	Hai	Goseong	Gyeongsangnam-do	https://www.gem.wiki/Samchonpo_power_station	L100000103487	G100000406157	KR7015760002	1	5360	5360	-4	2068	2108	2148
oil/gas	South Korea	Asia	Eastern Asia	Sejong (KOMIPO) power station	1			530	operating	2013		CC	LNG					Korea Midland Power Co Ltd [100.0%]	Korea Electric Power Corp [100.0%]	36.4686	127.247	exact	Sejong	Songwan		Chungcheongnam-do	https://www.gem.wiki/Sejong_(KOMIPO)_power_station	L100000406325	G100000406158	KR7015760002	1	530	530	11	2053	2093	2133
oil/gas	South Korea	Asia	Eastern Asia	Seoincheon KOWEPO power station	1	서인천C/C		225	operating	1992		CC	LNG					Korea Western Power Co Ltd [100.0%]	Korea Electric Power Corp [100.0%]	37.5363	126.603	exact	Seo-gu			Incheon	https://www.gem.wiki/Seoincheon_KOWEPO_power_station	L100000401390	G100000401391	KR7015760002	1	1800		32	2032	2072	2112
oil/gas	South Korea	Asia	Eastern Asia	Seoincheon KOWEPO power station	2	서인천C/C		225	operating	1992		CC	LNG					Korea Western Power Co Ltd [100.0%]	Korea Electric Power Corp [100.0%]	37.5363	126.603	exact	Seo-gu			Incheon	https://www.gem.wiki/Seoincheon_KOWEPO_power_station	L100000401390	G100000401392	KR7015760002	1	1800		32	2032	2072	2112
oil/gas	South Korea	Asia	Eastern Asia	Seoincheon KOWEPO power station	3	서인천C/C		225	operating	1992		CC	LNG					Korea Western Power Co Ltd [100.0%]	Korea Electric Power Corp [100.0%]	37.5363	126.603	exact	Seo-gu			Incheon	https://www.gem.wiki/Seoincheon_KOWEPO_power_station	L100000401390	G100000401393	KR7015760002	1	1800		32	2032	2072	2112
oil/gas	South Korea	Asia	Eastern Asia	Seoincheon KOWEPO power station	4	서인천C/C		225	operating	1992		CC	LNG					Korea Western Power Co Ltd [100.0%]	Korea Electric Power Corp [100.0%]	37.5363	126.603	exact	Seo-gu			Incheon	https://www.gem.wiki/Seoincheon_KOWEPO_power_station	L100000401390	G100000401394	KR7015760002	1	1800		32	2032	2072	2112
oil/gas	South Korea	Asia	Eastern Asia	Seoincheon KOWEPO power station	5	서인천C/C		225	operating	1992		CC	LNG					Korea Western Power Co Ltd [100.0%]	Korea Electric Power Corp [100.0%]	37.5363	126.603	exact	Seo-gu			Incheon	https://www.gem.wiki/Seoincheon_KOWEPO_power_station	L100000401390	G100000401395	KR7015760002	1	1800		32	2032	2072	2112
oil/gas	South Korea	Asia	Eastern Asia	Seoincheon KOWEPO power station	6	서인천C/C		225	operating	1992		CC	LNG					Korea Western Power Co Ltd [100.0%]	Korea Electric Power Corp [100.0%]	37.5363	126.603	exact	Seo-gu			Incheon	https://www.gem.wiki/Seoincheon_KOWEPO_power_station	L100000401390	G100000401396	KR7015760002	1	1800		32	2032	2072	2112
oil/gas	South Korea	Asia	Eastern Asia	Seoincheon KOWEPO power station	7	서인천C/C		225	operating	1992		CC	LNG					Korea Western Power Co Ltd [100.0%]	Korea Electric Power Corp [100.0%]	37.5363	126.603	exact	Seo-gu			Incheon	https://www.gem.wiki/Seoincheon_KOWEPO_power_station	L100000401390	G100000401397	KR7015760002	1	1800		32	2032	2072	2112
oil/gas	South Korea	Asia	Eastern Asia	Seoincheon KOWEPO power station	8	서인천C/C		225	operating	1992		CC	LNG					Korea Western Power Co Ltd [100.0%]	Korea Electric Power Corp [100.0%]	37.5363	126.603	exact	Seo-gu			Incheon	https://www.gem.wiki/Seoincheon_KOWEPO_power_station	L100000401390	G100000401398	KR7015760002	1	1800	1800	32	2032	2072	2112
oil/gas	South Korea	Asia	Eastern Asia	Seoul power station	1			400	operating	2019		CC	LNG					Korea Midland Power Co Ltd [100.0%]	Korea Electric Power Corp [100.0%]	37.5442	126.92	exact	Seoul			Gyeonggi-do	https://www.gem.wiki/Seoul_power_station	L100000401398	G100000401399	KR7015760002	1	800		5	2059	2099	2139
oil/gas	South Korea	Asia	Eastern Asia	Seoul power station	2			400	operating	2019		CC	LNG					Korea Midland Power Co Ltd [100.0%]	Korea Electric Power Corp [100.0%]	37.5442	126.92	exact	Seoul			Gyeonggi-do	https://www.gem.wiki/Seoul_power_station	L100000401398	G100000401400	KR7015760002	1	800	800	5	2059	2099	2139
oil/gas	South Korea	Asia	Eastern Asia	Shin Pyeongtaek power station	CC1	신평택복합	Shin Pyeongtaek	950	operating	2019		CC	LNG					Shin Pyongtaek Power Co Ltd [100.0%]	GS Energy Corp; Korea Electric Power Corp	37.0038	126.795	exact	Pyeongtaek			Gyeonggi-do	https://www.gem.wiki/Shin_Pyeongtaek_power_station	L100000408898	G100000401401	KR7015760002	0.5	950	950	5	2059	2099	2139
oil/gas	South Korea	Asia	Eastern Asia	Shinincheon power station	1	신인천C/C	Seoinchon KOSPA/Seoincheon KOSPO/New Incheon Complex	450	operating	1997		CC	LNG					Korea Southern Power Co Ltd [100.0%]	Korea Electric Power Corp [100.0%]	37.508	126.616	exact	Seo-gu			Incheon	https://www.gem.wiki/Shinincheon_power_station	L100000401409	G100000401410	KR7015760002	1	1800		27	2037	2077	2117
oil/gas	South Korea	Asia	Eastern Asia	Shinincheon power station	2	신인천C/C	Seoinchon KOSPA/Seoincheon KOSPO/New Incheon Complex	450	operating	1997		CC	LNG					Korea Southern Power Co Ltd [100.0%]	Korea Electric Power Corp [100.0%]	37.508	126.616	exact	Seo-gu			Incheon	https://www.gem.wiki/Shinincheon_power_station	L100000401409	G100000401411	KR7015760002	1	1800		27	2037	2077	2117
oil/gas	South Korea	Asia	Eastern Asia	Shinincheon power station	3	신인천C/C	Seoinchon KOSPA/Seoincheon KOSPO/New Incheon Complex	450	operating	1997		CC	LNG					Korea Southern Power Co Ltd [100.0%]	Korea Electric Power Corp [100.0%]	37.508	126.616	exact	Seo-gu			Incheon	https://www.gem.wiki/Shinincheon_power_station	L100000401409	G100000401412	KR7015760002	1	1800		27	2037	2077	2117
oil/gas	South Korea	Asia	Eastern Asia	Shinincheon power station	4	신인천C/C	Seoinchon KOSPA/Seoincheon KOSPO/New Incheon Complex	450	operating	1997		CC	LNG					Korea Southern Power Co Ltd [100.0%]	Korea Electric Power Corp [100.0%]	37.508	126.616	exact	Seo-gu			Incheon	https://www.gem.wiki/Shinincheon_power_station	L100000401409	G100000401413	KR7015760002	1	1800	1800	27	2037	2077	2117
oil/gas	South Korea	Asia	Eastern Asia	Shinsejong power station	1		Shinsejong	630	construction	2024		CC	LNG					Korea Southern Power Co Ltd [100.0%]	Korea Electric Power Corp [100.0%]	36.5273	127.297	approximate	Sejong	Nuri-Ri	Yeongi-Myeon	Chungcheongnam-do	https://www.gem.wiki/Shinsejong_power_station	L100000406326	G100000406159	KR7015760002	1	630	630	0	2064	2104	2144
oil/gas	United Arab Emirates	Asia	Western Asia	Shuweihat S3 power plant	1	مجمع الشويهات للطاقة والمياه/محطة الشويهات S3 المستقلة للمياه والطاقة		823.5	operating	2014	2039	CC	NG					Korea Electric Power Corp [55.0%]; Sumitomo Corp [45.0%]	Korea Electric Power Corp [55.0%]; Sumitomo Corp [45.0%]	24.1535	52.5662	approximate	Jebel Dhanna			Abu Dhabi	https://www.gem.wiki/Shuweihat_S3_power_plant	L100000405594	G100000405051	KR7015760002	0.55	1647		10	2054	2094	2134
oil/gas	United Arab Emirates	Asia	Western Asia	Shuweihat S3 power plant	2	مجمع الشويهات للطاقة والمياه/محطة الشويهات S3 المستقلة للمياه والطاقة		823.5	operating	2014	2039	CC	NG					Korea Electric Power Corp [55.0%]; Sumitomo Corp [45.0%]	Korea Electric Power Corp [55.0%]; Sumitomo Corp [45.0%]	24.1535	52.5662	approximate	Jebel Dhanna			Abu Dhabi	https://www.gem.wiki/Shuweihat_S3_power_plant	L100000405594	G100000405052	KR7015760002	0.55	1647	1647	10	2054	2094	2134
oil/gas	Thailand	Asia	South-eastern Asia	Songkhla Chana power station	1			1700	announced			CC	LNG					Korea Western Power Co Ltd [100.0%]	Korea Electric Power Corp [100.0%]	7.31237	100.674	approximate	Chana Dist			Songkhla	https://www.gem.wiki/Songkhla_Chana_power_station	L100000407521	G100000409726	KR7015760002	1	1700	1700	-99	40	80	120
oil/gas	Jamaica	Americas	Latin America and the Caribbean	South Jamaica Power Centre	1		Old Harbour power plant	194	operating	2019		CC	LNG					South Jamaica Power Co [100%]	Korea Electric Power Corp [40.0%]; Marubeni Corp [39.9%]; PetroCaribe Development Fund [10.0%]; Jamaica Public Service Co Ltd [10.0%]; other [0.0%]	17.8996	-77.1083	exact	Old Harbour Bay			St Catherine	https://gem.wiki/South_Jamaica_Power_Centre	L100000406599	G100000406670	KR7015760002	0.4	194	194	5	2059	2099	2139
oil/gas	South Korea	Asia	Eastern Asia	Taean power station	1			500	announced	2025		not found	LNG					Korea Western Power Co Ltd [100.0%]	Korea Electric Power Corp [100.0%]	36.9056	126.235	exact	Bangal	Wonbuk	Taean	Chungcheongnam-do	https://www.gem.wiki/Taean_power_station	L100000103483	G100000406161	KR7015760002	1	9446		-1	2065	2105	2145
oil/gas	South Korea	Asia	Eastern Asia	Taean power station	2			500	announced	2025		not found	LNG					Korea Western Power Co Ltd [100.0%]	Korea Electric Power Corp [100.0%]	36.9056	126.235	exact	Bangal	Wonbuk	Taean	Chungcheongnam-do	https://www.gem.wiki/Taean_power_station	L100000103483	G100000406162	KR7015760002	1	9446		-1	2065	2105	2145
oil/gas	South Korea	Asia	Eastern Asia	Taean power station	3			500	announced	2028		not found	LNG					Korea Western Power Co Ltd [100.0%]	Korea Electric Power Corp [100.0%]	36.9056	126.235	exact	Bangal	Wonbuk	Taean	Chungcheongnam-do	https://www.gem.wiki/Taean_power_station	L100000103483	G100000406163	KR7015760002	1	9446		-4	2068	2108	2148
oil/gas	South Korea	Asia	Eastern Asia	Taean power station	4			500	announced	2029		not found	LNG					Korea Western Power Co Ltd [100.0%]	Korea Electric Power Corp [100.0%]	36.9056	126.235	exact	Bangal	Wonbuk	Taean	Chungcheongnam-do	https://www.gem.wiki/Taean_power_station	L100000103483	G100000406164	KR7015760002	1	9446		-5	2069	2109	2149
oil/gas	South Korea	Asia	Eastern Asia	Taean power station	5			500	announced	2032		not found	LNG					Korea Western Power Co Ltd [100.0%]	Korea Electric Power Corp [100.0%]	36.9056	126.235	exact	Bangal	Wonbuk	Taean	Chungcheongnam-do	https://www.gem.wiki/Taean_power_station	L100000103483	G100000406165	KR7015760002	1	9446		-8	2072	2112	2152
oil/gas	South Korea	Asia	Eastern Asia	Taean power station	6			500	announced	2032		not found	LNG					Korea Western Power Co Ltd [100.0%]	Korea Electric Power Corp [100.0%]	36.9056	126.235	exact	Bangal	Wonbuk	Taean	Chungcheongnam-do	https://www.gem.wiki/Taean_power_station	L100000103483	G100000406166	KR7015760002	1	9446	9446	-8	2072	2112	2152
oil/gas	United States	Americas	Northern America	Trumbull Energy Center power station	CC1			950	construction	2026		CC	NG/D					Korea Overseas Infrastructure & Urban Development Corp Corp; Korea Southern Power Co Ltd; Siemens Energy Inc	Korea Electric Power Corp; Korea Overseas Infrastructure & Urban Development Corp Corp; Siemens Energy AG	41.1502	-80.8537	exact	Lordstown	Trumbull		Ohio	https://www.gem.wiki/Trumbull_Energy_Center_power_station	L100000408878	G100000413022	KR7015760002	0.333333	950	950	-2	2066	2106	2146
oil/gas	United States	Americas	Northern America	Ukudu power station	1		Dededo	180	construction	2024		CC	NG/D					Guam Ukudu Power LLC [100.0%]	Kansai Electric Power Co [60.0%]; Korea Electric Power Corp [40.0%]	13.524	144.807	approximate	Dededo			Guam	https://www.gem.wiki/Ukudu_power_station	L100000406935	G100000407918	KR7015760002	0.4	180	180	0	2064	2104	2144
oil/gas	South Korea	Asia	Eastern Asia	Ulsan power station	1			300	operating	1995		CC	LNG					Korea East-West Power Co Ltd [100.0%]	Korea Electric Power Corp [100.0%]	35.477	129.383	exact	Ulsan			Ulsan	https://www.gem.wiki/Ulsan_power_station	L100000401401	G100000401403	KR7015760002	1	1998		29	2035	2075	2115
oil/gas	South Korea	Asia	Eastern Asia	Ulsan power station	2			450	operating	1997		CC	LNG					Korea East-West Power Co Ltd [100.0%]	Korea Electric Power Corp [100.0%]	35.477	129.383	exact	Ulsan			Ulsan	https://www.gem.wiki/Ulsan_power_station	L100000401401	G100000401404	KR7015760002	1	1998		27	2037	2077	2117
oil/gas	South Korea	Asia	Eastern Asia	Ulsan power station	3			300	operating	1997		CC	LNG					Korea East-West Power Co Ltd [100.0%]	Korea Electric Power Corp [100.0%]	35.477	129.383	exact	Ulsan			Ulsan	https://www.gem.wiki/Ulsan_power_station	L100000401401	G100000412613	KR7015760002	1	1998		27	2037	2077	2117
oil/gas	South Korea	Asia	Eastern Asia	Ulsan power station	4			948	operating	2014		CC	LNG					Korea East-West Power Co Ltd [100.0%]	Korea Electric Power Corp [100.0%]	35.477	129.383	exact	Ulsan			Ulsan	https://www.gem.wiki/Ulsan_power_station	L100000401401	G100000401402	KR7015760002	1	1998	1998	10	2054	2094	2134
oil/gas	Vietnam	Asia	South-eastern Asia	Vung Ang power station	3-CC1			4800	cancelled			not found	LNG					Korea Electric Power Corp; Power Engineering Consulting JSC 2 (PECC2); Siemens Energy AG	Korea Electric Power Corp; Siemens Energy AG	18.0979	106.381	exact	Kỳ Lợi		Kỳ Anh	Ha Tinh	https://www.gem.wiki/Vung_Ang_power_station	L100000104310	G100000408644	KR7015760002	0.5	4800	4800	-99	40	80	120
oil/gas	South Korea	Asia	Eastern Asia	Yeongheung power station	1		Yonghungdo	800	announced	2034		not found	LNG					Korea South-East Power Co Ltd [100.0%]	Korea Electric Power Corp [100.0%]	37.2369	126.436	exact	Oe-ri	Yeongheung	Ongjin	Incheon	https://www.gem.wiki/Yeongheung_power_station	L100000103466	G100000406170	KR7015760002	1	8420		-10	2074	2114	2154
oil/gas	South Korea	Asia	Eastern Asia	Yeongheung power station	2		Yonghungdo	800	announced	2034		not found	LNG					Korea South-East Power Co Ltd [100.0%]	Korea Electric Power Corp [100.0%]	37.2369	126.436	exact	Oe-ri	Yeongheung	Ongjin	Incheon	https://www.gem.wiki/Yeongheung_power_station	L100000103466	G100000406171	KR7015760002	1	8420	8420	-10	2074	2114	2154
oil/gas	South Korea	Asia	Eastern Asia	Yeongnam power station	1	영남파워		476	operating	2018		CC	NG					KOSPO YoungNam Power Co Ltd [100.0%]	Korea Electric Power Corp [50.0%]	35.514	129.383	exact	Nam-gu			Ulsan	https://www.gem.wiki/Yeongnam_power_station	L100000401413	G100000401414	KR7015760002	0.5	476	476	6	2058	2098	2138
oil/gas	South Korea	Asia	Eastern Asia	Yeongwol power station	1		Yong-Wol	848	operating	2010		CC	LNG					Korea Southern Power Co Ltd [100.0%]	Korea Electric Power Corp [100.0%]	37.1629	128.492	exact	Youngwol-si			Gyeongsangbuk-do	https://www.gem.wiki/Yeongwol_power_station	L100000401405	G100000401406	KR7015760002	1	848	848	14	2050	2090	2130
solar	United States	Americas	Northern America	Astoria solar farm	1		RE Astoria 1	100	operating	2016		PV						KEPCO		34.8442	-118.459	exact		Kern County		California	https://gem.wiki/Astoria_solar_farm	L804724	G805444	KR7015760002	1	175		8	2056	2096	2136
solar	United States	Americas	Northern America	Astoria solar farm	2		RE Astoria 2	75	operating	2016		PV						KEPCO		34.8366	-118.48	exact		Kern County		California	https://gem.wiki/Astoria_solar_farm	L804724	G805443	KR7015760002	1	175	175	8	2056	2096	2136
solar	United States	Americas	Northern America	Barren Ridge solar farm			RE Cinco Project, RE Barren Ridge	60	operating	2016		PV						KEPCO		35.2047	-118.069	exact		Kern County		California	https://gem.wiki/Barren_Ridge_solar_farm	L804725	G805445	KR7015760002	1	60	60	8	2056	2096	2136
solar	United States	Americas	Northern America	Cogentrix Of Alamosa solar farm			Alamosa Substation	30	operating	2012		PV						KEPCO		37.5986	-105.956	exact		Alamosa County		Colorado	https://gem.wiki/Cogentrix_Of_Alamosa_solar_farm	L804571	G805256	KR7015760002	1	30	30	12	2052	2092	2132
solar	Mexico	Americas	Latin America and the Caribbean	El Mayo Photovoltaic solar farm		Granja Solar Fotovoltaica El Mayo		126	operating	2021		PV						Korea Electric Power CORP (KEPCO); Sprott Korea		26.887	-109.362	exact		El Mayo	Hermosillo	Sonora	https://gem.wiki/El_Mayo_Photovoltaic_solar_farm	L807303	G808681	KR7015760002	0.5	126	126	3	2061	2101	2141
solar	Mexico	Americas	Latin America and the Caribbean	Horus Photovoltaic solar farm		Granja Solar Fotovoltaica Horus		119	operating	2023		PV						Korea Electric Power CORP (KEPCO); Sprott Korea		22.099	-102.32	exact			Pabellon De Arteaga	Aguascalientes	https://gem.wiki/Horus_Photovoltaic_solar_farm	L807304	G808682	KR7015760002	0.5	119	119	1	2063	2103	2143
solar	Guam	Oceania	Micronesia	Mangilao solar farm				60	operating	2022		PV						Korea Electric Power CORP (KEPCO); Foss and CO		13.4891	144.861	exact		Mangilao Municipality		Guam	https://gem.wiki/Mangilao_solar_farm	L805602	G806445	KR7015760002	0.5	60	60	2	2062	2102	2142
solar	Japan	Asia	Eastern Asia	Shin Chitose Kashiwadai Solar Power Plant		新千歳柏台太陽光発電所	Shin-Chitose Kashiwadai, LSIS Shin Chitose megasolar PV Park, New Chitose Kashiwadai Solar Power Plant	28	operating	2017		PV						Japan's Energy Products Corporation; Korea Electric Power CORP (KEPCO)		42.8033	141.686	exact	Chitose				https://gem.wiki/Shin_Chitose_Kashiwadai_Solar_Power_Plant	L801373	G801577	KR7015760002	0.5	28	28	7	2057	2097	2137
solar	Mexico	Americas	Latin America and the Caribbean	Tastiota Photovoltaic solar farm		Granja Solar Fotovoltaica Tastiota		125	operating	2021		PV						Korea Electric Power CORP (KEPCO); Sprott Korea		28.3495	-111.341	exact		Tastiota	Hermosillo	Sonora	https://gem.wiki/Tastiota_Photovoltaic_solar_farm	L807305	G808683	KR7015760002	0.5	125	125	3	2061	2101	2141
wind	South Korea	Asia	Eastern Asia	Danyang wind farm				20	cancelled			onshore						KEPCO		36.9598	128.337	approximate				Chungcheongbuk-do	https://gem.wiki/Danyang_wind_farm	L900930	G901064	KR7015760002	1	20	20	-99	40	80	120
wind	Jordan	Asia	Western Asia	Fujeij wind farm			Fujeiji	89	operating	2019		onshore						KEPCO		30.5604	35.63	exact		Busayra Sub-District	Busayra District	Tafilah	https://gem.wiki/Fujeij_wind_farm	L905928	G908107	KR7015760002	1	89	89	5	2059	2099	2139
wind	South Korea	Asia	Eastern Asia	Gyeongbuk wind farm			Gyeongbuk Demonstration Complex Offshore Wind Farm	200	shelved			offshore mount unknown						Gyeongbuk Technopark; Gyeonbuk Province; Korea Hydro & Nuclear Power (KHNP) CO LTD; Korea Electric Power CORP (KEPCO); Korea Institute of Energy Research		36.421	129.442	approximate		Yeongdeok-gun		North Gyeongsang Province	https://gem.wiki/Gyeongbuk_wind_farm	L900917	G901050	KR7015760002	0.2	200	200	-99	40	80	120
wind	South Korea	Asia	Eastern Asia	Jeju Hanlim wind farm			Hallym Wind Farm, Hallym Offshore Wind Power Demonstration Offshore Wind Farm, Hanrim-eup	100	construction	2024		offshore mount unknown						Korea Midland Power CO LTD (KOMIPO); Korea Electric Power CORP (KEPCO); KEPCO Engineering & Construction Company INC; Hyundai Engineering & Construction CO LTD		33.4454	126.254	approximate	Hanlim-eup			Jeju Province	https://gem.wiki/Jeju_Hanlim_wind_farm	L900750	G900858	KR7015760002	0.25	100	100	0	2064	2104	2144
wind	South Korea	Asia	Eastern Asia	Saemangeum Offshore Wind Power Plant		새만금해상풍력발전소		99	cancelled			offshore mount unknown						Korea Electric Power CORP (KEPCO); Mirae Asia Energy CORP		35.8936	126.556	approximate	Gunsan-si			North Jeolla Province	https://gem.wiki/Saemangeum_Offshore_Wind_Power_Plant	L916851	G920918	KR7015760002	0.5	99	99	-99	40	80	120
wind	South Korea	Asia	Eastern Asia	Sinan (KEPCO) Wind Farm	1		Sinan - Kepco	1500	pre-construction			offshore mount unknown						Korea Electric Power CORP (KEPCO); Jeonnam Development CORP		34.963	126.002	approximate	Jaeun-myeon	Sinan-gun		South Jeolla Province	https://gem.wiki/Sinan_(KEPCO)_Wind_Farm	L900931	G901065	KR7015760002	0.5	1500	1500	-99	40	80	120
wind	South Korea	Asia	Eastern Asia	Southwest Offshore wind farm	2		Seonam Offshore Wind Farm	460	pre-construction	2027		offshore hard mount						Korea Offshore Wind Power (KOWP); Korea Electric Power CORP (KEPCO) [25%]; other		35.5382	126.223	approximate		Gochang-gun		North Jeolla Province	https://gem.wiki/Southwest_Offshore_wind_farm	L900748	G901079	KR7015760002	0.333333	2460		-3	2067	2107	2147
wind	South Korea	Asia	Eastern Asia	Southwest Offshore wind farm	3		Southwest Offshore - phase 3 Offshore Wind Farm	2000	pre-construction	2027		offshore mount unknown						Korea East-West Power CO LTD; Korea Electric Power CORP (KEPCO); Korea Hydro & Nuclear Power (KHNP) CO LTD; Korea South-East Power CO LTD (KOEN); Korea Midland Power CO LTD (KOMIPO); Korea Southern Power CO LTD; Korea Western Power CO LTD		35.5909	126.223	approximate		Gochang-gun		North Jeolla Province	https://gem.wiki/Southwest_Offshore_wind_farm	L900748	G901080	KR7015760002	0.142857	2460	2460	-3	2067	2107	2147
wind	South Korea	Asia	Eastern Asia	Yeongwol wind farm			Yeongwol Eco Wind	46	construction	2023		onshore						Korea Electric Power CORP (KEPCO); E1 CORP		37.2422	128.384	approximate		Yeongwol-gun		Gangwon Province	https://gem.wiki/Yeongwol_wind_farm	L916889	G920959	KR7015760002	0.5	46	46	1	2063	2103	2143

## Sheet: Factors
Fuel Type	Capacity factor 2021	Capacity factor 2022	CF2020	CF2021	CF2022	CF2023		Korea Electric Power Corp. (KEPCO) - annual report 2021	https://home.kepco.co.kr/kepco/EN/ntcob/list.do?boardCd=BRD_000259&menuCd=EN030201
Coal-hard	0.601019	0.553976	0.59752	0.604519	0.575951	0.532		Korea Electric Power Corp. (KEPCO) - annual report 2022	https://home.kepco.co.kr/kepco/EN/ntcob/list.do?boardCd=BRD_000259&menuCd=EN030201
Lignite	0	0	0	0	0	0
Oil	0.112553	0.121056	0.109817	0.115289	0.125307	0.116805
Gas	0.306124	0.367538	0.265804	0.346443	0.339076	0.396
Fuel Type	Heat rate (Btu per kWh) 2022
Coal	10689							CDP C-EU8.2d 2021
Petroleum	11166							Energy Source Type	Nameplate capacity (MW)	Gross electricity generation (GWh)	Net electricity generation (GWh)	Absolute scope 1 emissions (metric tons CO2e)	Scope 1 emissions intensity (metric tons CO2e per GWh)		Capacity factor
Natural Gas	7740							Coal – hard	0	0	0	0	0
Nuclear	10448							Lignite	0	0	0	0	0
								Oil	96.81	298.23	280.15	193801	649.84		0.351663
Fuel Type	Emission factors (kg of CO2 per TJ) US		Fuel Type	Emission factors (kg of CO2 per TJ) IPCC2006				Gas	0	0	0	0	0
Bituminous Coal	88374.7		Crude Oil	73300				Sustainable biomass	0	0	0	0	0
Distillate Oil	70271.4		Natural Gas Liquids	64200				Other biomass	0	0	0	0	0
Jet Fuel	68461		Coking Coal	94600				Waste (non-biomass)	0	0	0	0	0
Kerosene	69370.9		Other Bituminous Coal	94600				Nuclear	0	0	0	0	0
Lignite Coal	93142.3		Sub-Bituminous Coal	96100				Fossil-fuel plants fitted with CCS	0	0	0	0	0
Municipal Solid Waste	47286.7		Lignite	101000				Geothermal	0	0	0	0	0
Natural Gas	50149.2		Coke	107000				Hydropower	0.7	2.75	2.75	0	0		0.448467
Petroleum Coke	96791.4		Gas/Diesel Oil	74100				Wind	0	0	0	0	0
Propane Gas	59598.9		Residual Fuel Oil	77400				Solar	0.72	4.07	4.07	0	0		0.645294
Refined Coal	88374.7		Natural Gas	56100				Marine	0	0	0	0	0
Residual Fuel Oil	71171.8		Natural Gas Liquids	64200				Other renewable	0	0	0	0	0
Subbituminous Coal	92061.8		Wood / Wood Waste	112000				Other non-renewable	0	0	0	0	0
Tire-Derived Fuel	81484.1		Charcoal	112000				Total	98.23	305.06	286.98	193801	649.83		0.354517
Waste Coal	88374.7		Industrial Wastes	143000
Waste Oil	70138.7		Waste Oils	73300
Fuel Type	Emission factors (kg of CO2 per MMBTU) US		Fuel Type	Emission factors (kg of CO2 per MMBTU) IPCC2006				CDP C-EU8.2d 2022
Bituminous Coal	93.24		Crude Oil	77.3354				Energy Source Type	Nameplate capacity (MW)	Gross electricity generation (GWh)	Net electricity generation (GWh)	Absolute scope 1 emissions (metric tons CO2e)	Scope 1 emissions intensity (metric tons CO2e per GWh)		Capacity factor
Distillate Oil	74.14		Natural Gas Liquids	67.7344				Coal – hard	0	0	0	0	0
Jet Fuel	72.23		Coking Coal	99.808				Lignite	0	0	0	0	0
Kerosene	73.19		Other Bituminous Coal	99.808				Oil	110.41	312.13	297.59	144284	462.25		0.322718
Lignite Coal	98.27		Sub-Bituminous Coal	101.391				Gas	0	0	0	0	0
Municipal Solid Waste	49.89		Lignite	106.56				Sustainable biomass	0	0	0	0	0
Natural Gas	52.91		Coke	112.891				Other biomass	0	0	0	0	0
Petroleum Coke	102.12		Gas/Diesel Oil	78.1794				Waste (non-biomass)	0	0	0	0	0
Propane Gas	62.88		Residual Fuel Oil	81.6611				Nuclear	0	0	0	0	0
Refined Coal	93.24		Natural Gas	59.1885				Fossil-fuel plants fitted with CCS	0	0	0	0	0
Residual Fuel Oil	75.09		Natural Gas Liquids	67.7344				Geothermal	0	0	0	0	0
Subbituminous Coal	97.13		Wood / Wood Waste	118.166				Hydropower	0.7	2.67	2.57	0	0		0.435421
Tire-Derived Fuel	85.97		Charcoal	118.166				Wind	0	0	0	0	0
Waste Coal	93.24		Industrial Wastes	150.873				Solar	0.66	1	0.9	0	0		0.172963
Waste Oil	74		Waste Oils	77.3354				Marine	0	0	0	0	0
								Other renewable	0	0	0	0	0
								Other non-renewable	0	0	0	0	0
								Total	111.76	315.81	301.07	144284	459.4		0.322578
								KEPCO does not own and operate power plants that consume Coal.
								https://home.kepco.co.kr/kepco/EN/ntcob/list.do?boardCd=BRD_000529&menuCd=EN040309
								https://home.kepco.co.kr/kepco/cmmn/fms/FileDownSecure.do?atchFileId=b7b5ebd16226d6e274e384bbc4dea2b56c90d5b9dc8a157fd555915a96df3f3ae1&fileSn=15f38e821aac47bd03c5b1170be0065fd1
								https://home.kepco.co.kr/kepco/EN/ntcob/list.do?pageIndex=2&boardSeq=0&boardCd=BRD_000242&menuCd=EN030405&parnScrpSeq=0&categoryCdGroup=&searchCondition=title&searchKeyword=
								MW	2020	2021	2022	2023					MW	2020	2021	2022	2023
								LNG	18052	18052	18052						LNG	23730	23762	23762
								Coal	34161	32559	32559						Coal	2693	4779	5569
								Others	6737	6745	5497		58950	57356	56108		Others	1829	1859	1780
																		28252	30400	31111
								GWh	2020	2021	2022	2023					GWh	2020	2021	2022	2023
								LNG	42033	54785	53620						LNG	104220	113734	110266
								Coal	178808	172419	164271						Coal	19293	26961	32390
								Others	6481	6812	6034		227322	234016	223925		Others	10087	4981	4498
																		133600	145676	147154
								CF	2020	2021	2022	2023					CF	2020	2021	2022	2023
								LNG	0.265804	0.346443	0.339076	0.396					LNG	0.501359	0.546391	0.52973	0.396
								Coal	0.59752	0.604519	0.575951	0.532					Coal	0.817823	0.644013	0.663941	0.532
								Oil	0.109817	0.115289	0.125307	0.116805					Oil	0.62957	0.305867	0.288466	0.407968
										2021_20	2022_23								2021_20	2022_23
								LNG		0.306124	0.367538						LNG		0.523875	0.462865
								Coal		0.601019	0.553976						Coal		0.730918	0.597971
								Total (MW)	83854	82459	82721
								Total (MW)	129191	134020	138018
								MW	2020	2021	2022	2023
								LNG	41782	41814	41814
								Coal	36854	37338	38128		78636	79152	79942
								Others	8566	8604	7277		87202	87756	87219
								GWh	2020	2021	2022	2023
								LNG	146253	168519	163886
								Coal	198101	199380	196661		344354	367899	360547
								Others	16568	11793	10532		360922	379692	371079	370564
								CF	2020	2021	2022	2023
								LNG	0.399587	0.460069	0.447421	0.435692
								Coal	0.613618	0.609574	0.588803	0.603998
								Oil	0.220794	0.156466	0.165217	0.180826

## Sheet: KEPCO_BAU
Type	Country/area	Region	Subregion	Plant / Project name	Unit / Phase name	Plant / Project name (local)	Plant / Project name (other)	Capacity (MW)	Status	Start year	Retired year	Technology	Fuel	Country/area 1 (hydropower only)	Country/area 2 (hydropower only)	Country/area 1 Capacity (MW) (hydropower only)	Country/area 2 Capacity (MW) (hydropower only)	Owner	Parent	Latitude	Longitude	Location accuracy	City	Local area (taluk, county)	Major area (prefecture, district)	Subnational unit (state, province)	GEM.Wiki URL	GEM location ID	GEM unit/phase ID	CompISIN	Ownership	Plant capacity	Plant capacity	Age	Reinvestment year	Reinvestment year	Reinvestment year	2020	2021	2022	2023	2024	2025	2026	2027	2028	2029	2030	2031
coal	South Korea	Asia	Eastern Asia	Anin power station	Unit 1	강릉 안인	Gnagneung, Gangnung Anin, Gangreung Anin, 강릉 안인	1040	operating	2022	2052	ultra-supercritical	unknown					Gangneung Eco Power [100%]	other unknown/mixed entity types [42.0%]; Korea Electric Power Corp [29.0%]; Samsung C&T Corp [29.0%]	37.7332	128.979	exact	Gangneung			Gangwon	https://www.gem.wiki/Anin_power_station	L100000103457	G100000100246	KR7015760002	0.29	2080		2	2062	2102	2142	0	0	301.6	301.6	301.6	301.6	301.6	301.6	301.6	301.6	301.6	301.6
coal	South Korea	Asia	Eastern Asia	Anin power station	Unit 2	강릉 안인	Gnagneung, Gangnung Anin, Gangreung Anin, 강릉 안인	1040	operating	2023	2052	ultra-supercritical	unknown					Gangneung Eco Power [100%]	other unknown/mixed entity types [42.0%]; Korea Electric Power Corp [29.0%]; Samsung C&T Corp [29.0%]	37.7332	128.979	exact	Gangneung			Gangwon	https://www.gem.wiki/Anin_power_station	L100000103457	G100000100247	KR7015760002	0.29	2080	2080	1	2063	2103	2143	0	0	0	301.6	301.6	301.6	301.6	301.6	301.6	301.6	301.6	301.6
coal	South Korea	Asia	Eastern Asia	Boryeong power station	Unit 5	보령 발전소	Poryong power station, 보령 발전소	500	operating	1993	2026	supercritical	bituminous					Korea Midland Power [100%]	Korea Electric Power Corp [100.0%]	36.4009	126.491	exact	Poryong-gun	Ocheon	Poryong	South Chungcheong	https://www.gem.wiki/Boryeong_power_station	L100000103477	G100000109273	KR7015760002	1	5400		31	2033	2073	2113	500	500	500	500	500	500	500	500	500	500	500	500
coal	South Korea	Asia	Eastern Asia	Boryeong power station	Unit 3	보령 발전소	Poryong power station, 보령 발전소	550	operating	1993	2043	supercritical	bituminous					Korea Midland Power [100%]	Korea Electric Power Corp [100.0%]	36.4009	126.491	exact	Poryong-gun	Ocheon	Poryong	South Chungcheong	https://www.gem.wiki/Boryeong_power_station	L100000103477	G100000109271	KR7015760002	1	5400		31	2033	2073	2113	550	550	550	550	550	550	550	550	550	550	550	550
coal	South Korea	Asia	Eastern Asia	Boryeong power station	Unit 4	보령 발전소	Poryong power station, 보령 발전소	500	operating	1993	2043	supercritical	bituminous					Korea Midland Power [100%]	Korea Electric Power Corp [100.0%]	36.4009	126.491	exact	Poryong-gun	Ocheon	Poryong	South Chungcheong	https://www.gem.wiki/Boryeong_power_station	L100000103477	G100000109272	KR7015760002	1	5400		31	2033	2073	2113	500	500	500	500	500	500	500	500	500	500	500	500
coal	South Korea	Asia	Eastern Asia	Boryeong power station	Unit 6	보령 발전소	Poryong power station, 보령 발전소	500	operating	1994	2026	supercritical	bituminous					Korea Midland Power [100%]	Korea Electric Power Corp [100.0%]	36.4009	126.491	exact	Poryong-gun	Ocheon	Poryong	South Chungcheong	https://www.gem.wiki/Boryeong_power_station	L100000103477	G100000109274	KR7015760002	1	5400		30	2034	2074	2114	500	500	500	500	500	500	500	500	500	500	500	500
coal	South Korea	Asia	Eastern Asia	Boryeong power station	Unit 7	보령 발전소	Poryong power station, 보령 발전소	500	operating	2008	2038	ultra-supercritical	bituminous					Korea Midland Power [100%]	Korea Electric Power Corp [100.0%]	36.4009	126.491	exact	Poryong-gun	Ocheon	Poryong	South Chungcheong	https://www.gem.wiki/Boryeong_power_station	L100000103477	G100000109275	KR7015760002	1	5400		16	2048	2088	2128	500	500	500	500	500	500	500	500	500	500	500	500
coal	South Korea	Asia	Eastern Asia	Boryeong power station	Unit 8	보령 발전소	Poryong power station, 보령 발전소	500	operating	2008	2038	ultra-supercritical	bituminous					Korea Midland Power [100%]	Korea Electric Power Corp [100.0%]	36.4009	126.491	exact	Poryong-gun	Ocheon	Poryong	South Chungcheong	https://www.gem.wiki/Boryeong_power_station	L100000103477	G100000109276	KR7015760002	1	5400	5400	16	2048	2088	2128	500	500	500	500	500	500	500	500	500	500	500	500
coal	South Korea	Asia	Eastern Asia	Bukpyung power station	Unit 1	북평화력	Buk-Pyeong power station; GS Donghae power station, 북평화력	595	operating	2017	2047	supercritical	anthracite					ST International; Korea East-West Power	Korea Electric Power Corp; ST International	37.4805	129.143	exact	Donghae			Gangwon	https://www.gem.wiki/Bukpyung_power_station	L100000103458	G100000101094	KR7015760002	0.5	1190		7	2057	2097	2137	297.5	297.5	297.5	297.5	297.5	297.5	297.5	297.5	297.5	297.5	297.5	297.5
coal	South Korea	Asia	Eastern Asia	Bukpyung power station	Unit 2	북평화력	Buk-Pyeong power station; GS Donghae power station, 북평화력	595	operating	2017	2047	supercritical	anthracite					ST International; Korea East-West Power	Korea Electric Power Corp; ST International	37.4805	129.143	exact	Donghae			Gangwon	https://www.gem.wiki/Bukpyung_power_station	L100000103458	G100000101095	KR7015760002	0.5	1190	1190	7	2057	2097	2137	297.5	297.5	297.5	297.5	297.5	297.5	297.5	297.5	297.5	297.5	297.5	297.5
coal	Indonesia	Asia	South-eastern Asia	Cirebon power station	Unit 1		井里汶电站	660	operating	2012	2037	supercritical	unknown					PT Cirebon Electric Power [100%]	Marubeni Corp [32.5%]; Korea Electric Power Corp [27.5%]; PT Indika Energy Tbk [20.0%]; ST International Corp [20.0%]	-6.77029	108.615	exact	Kanci Kulon	Astanajapura	Cirebon	West Java	https://www.gem.wiki/Cirebon_power_station	L100000102814	G100000101590	KR7015760002	0.275	1584		12	2052	2092	2132	181.5	181.5	181.5	181.5	181.5	181.5	181.5	181.5	181.5	181.5	181.5	181.5
coal	Indonesia	Asia	South-eastern Asia	Cirebon power station	Unit 2		井里汶电站	924	operating	2023		ultra-supercritical	unknown					PT Cirebon Electric Power [100%]	Marubeni Corp [32.5%]; Korea Electric Power Corp [27.5%]; PT Indika Energy Tbk [20.0%]; ST International Corp [20.0%]	-6.77029	108.615	exact	Kanci Kulon	Astanajapura	Cirebon	West Java	https://www.gem.wiki/Cirebon_power_station	L100000102814	G100000101591	KR7015760002	0.275	1584	1584	1	2063	2103	2143	0	0	0	254.1	254.1	254.1	254.1	254.1	254.1	254.1	254.1	254.1
coal	South Korea	Asia	Eastern Asia	Dangjin power station	Unit 1	당진 발전소	당진 발전소	500	operating	1999	2029	supercritical	bituminous					Korea East-West Power [100%]	Korea Electric Power Corp [100.0%]	37.0551	126.512	exact	Gyoro	Seokmun	Dangjin	South Chungcheong	https://www.gem.wiki/Dangjin_power_station	L100000103480	G100000101952	KR7015760002	1	6040		25	2039	2079	2119	500	500	500	500	500	500	500	500	500	500	500	500
coal	South Korea	Asia	Eastern Asia	Dangjin power station	Unit 2	당진 발전소	당진 발전소	500	operating	1999	2029	supercritical	bituminous					Korea East-West Power [100%]	Korea Electric Power Corp [100.0%]	37.0551	126.512	exact	Gyoro	Seokmun	Dangjin	South Chungcheong	https://www.gem.wiki/Dangjin_power_station	L100000103480	G100000101954	KR7015760002	1	6040		25	2039	2079	2119	500	500	500	500	500	500	500	500	500	500	500	500
coal	South Korea	Asia	Eastern Asia	Dangjin power station	Unit 3	당진 발전소	당진 발전소	500	operating	2000	2030	supercritical	bituminous					Korea East-West Power [100%]	Korea Electric Power Corp [100.0%]	37.0551	126.512	exact	Gyoro	Seokmun	Dangjin	South Chungcheong	https://www.gem.wiki/Dangjin_power_station	L100000103480	G100000101955	KR7015760002	1	6040		24	2040	2080	2120	500	500	500	500	500	500	500	500	500	500	500	500
coal	South Korea	Asia	Eastern Asia	Dangjin power station	Unit 4	당진 발전소	당진 발전소	500	operating	2001	2030	supercritical	bituminous					Korea East-West Power [100%]	Korea Electric Power Corp [100.0%]	37.0551	126.512	exact	Gyoro	Seokmun	Dangjin	South Chungcheong	https://www.gem.wiki/Dangjin_power_station	L100000103480	G100000101956	KR7015760002	1	6040		23	2041	2081	2121	500	500	500	500	500	500	500	500	500	500	500	500
coal	South Korea	Asia	Eastern Asia	Dangjin power station	Unit 5	당진 발전소	당진 발전소	500	operating	2005	2035	ultra-supercritical	bituminous					Korea East-West Power [100%]	Korea Electric Power Corp [100.0%]	37.0551	126.512	exact	Gyoro	Seokmun	Dangjin	South Chungcheong	https://www.gem.wiki/Dangjin_power_station	L100000103480	G100000101957	KR7015760002	1	6040		19	2045	2085	2125	500	500	500	500	500	500	500	500	500	500	500	500
coal	South Korea	Asia	Eastern Asia	Dangjin power station	Unit 6	당진 발전소	당진 발전소	500	operating	2006	2036	ultra-supercritical	bituminous					Korea East-West Power [100%]	Korea Electric Power Corp [100.0%]	37.0551	126.512	exact	Gyoro	Seokmun	Dangjin	South Chungcheong	https://www.gem.wiki/Dangjin_power_station	L100000103480	G100000101958	KR7015760002	1	6040		18	2046	2086	2126	500	500	500	500	500	500	500	500	500	500	500	500
coal	South Korea	Asia	Eastern Asia	Dangjin power station	Unit 7	당진 발전소	당진 발전소	500	operating	2007	2037	ultra-supercritical	bituminous					Korea East-West Power [100%]	Korea Electric Power Corp [100.0%]	37.0551	126.512	exact	Gyoro	Seokmun	Dangjin	South Chungcheong	https://www.gem.wiki/Dangjin_power_station	L100000103480	G100000101959	KR7015760002	1	6040		17	2047	2087	2127	500	500	500	500	500	500	500	500	500	500	500	500
coal	South Korea	Asia	Eastern Asia	Dangjin power station	Unit 8	당진 발전소	당진 발전소	500	operating	2007	2037	ultra-supercritical	bituminous					Korea East-West Power [100%]	Korea Electric Power Corp [100.0%]	37.0551	126.512	exact	Gyoro	Seokmun	Dangjin	South Chungcheong	https://www.gem.wiki/Dangjin_power_station	L100000103480	G100000101960	KR7015760002	1	6040		17	2047	2087	2127	500	500	500	500	500	500	500	500	500	500	500	500
coal	South Korea	Asia	Eastern Asia	Dangjin power station	Unit 9	당진 발전소	당진 발전소	1020	operating	2016	2045	ultra-supercritical	bituminous					Korea East-West Power [100%]	Korea Electric Power Corp [100.0%]	37.0551	126.512	exact	Dangjin			South Chungcheong	https://www.gem.wiki/Dangjin_power_station	L100000103480	G100000101961	KR7015760002	1	6040		8	2056	2096	2136	1020	1020	1020	1020	1020	1020	1020	1020	1020	1020	1020	1020
coal	South Korea	Asia	Eastern Asia	Dangjin power station	Unit 10	당진 발전소	당진 발전소	1020	operating	2016	2046	ultra-supercritical	bituminous					Korea East-West Power [100%]	Korea Electric Power Corp [100.0%]	37.0551	126.512	exact	Gyoro	Seokmun	Dangjin	South Chungcheong	https://www.gem.wiki/Dangjin_power_station	L100000103480	G100000101953	KR7015760002	1	6040	6040	8	2056	2096	2136	1020	1020	1020	1020	1020	1020	1020	1020	1020	1020	1020	1020
coal	South Korea	Asia	Eastern Asia	Donghae power station	Unit 1	동해 발전소	East Sea power station, 동해 발전소	200	operating	1998	2028	subcritical	anthracite					Korea East-West Power [100%]	Korea Electric Power Corp [100.0%]	37.4863	129.147	exact	Donghae		Donghae	Gangwon	https://www.gem.wiki/Donghae_power_station	L100000103460	G100000102425	KR7015760002	1	400		26	2038	2078	2118	200	200	200	200	200	200	200	200	200	200	200	200
coal	South Korea	Asia	Eastern Asia	Donghae power station	Unit 2	동해 발전소	East Sea power station, 동해 발전소	200	operating	1999	2029	subcritical	anthracite					Korea East-West Power [100%]	Korea Electric Power Corp [100.0%]	37.4863	129.147	exact	Donghae		Donghae	Gangwon	https://www.gem.wiki/Donghae_power_station	L100000103460	G100000102426	KR7015760002	1	400	400	25	2039	2079	2119	200	200	200	200	200	200	200	200	200	200	200	200
coal	South Korea	Asia	Eastern Asia	Goseong Green power station	Unit 1	고성그린파워	Goseong Hi, Goseung Hai, Goseong High, 고성그린파워	1040	operating	2021	2051	ultra-supercritical	unknown					Goseong Green Power [100%]	other unknown/mixed entity types [52.0%]; Korea Electric Power Corp [29.0%]; SK Gas Co Ltd [19.0%]	34.9049	128.125	exact	Hai-myeon	Geumseong	Hadong	South Gyeongsang	https://www.gem.wiki/Goseong_Green_power_station	L100000103484	G100000103106	KR7015760002	0.29	2080		3	2061	2101	2141	0	301.6	301.6	301.6	301.6	301.6	301.6	301.6	301.6	301.6	301.6	301.6
coal	South Korea	Asia	Eastern Asia	Goseong Green power station	Unit 2	고성그린파워	Goseong Hi, Goseung Hai, Goseong High, 고성그린파워	1040	operating	2021	2051	ultra-supercritical	unknown					Goseong Green Power [100%]	other unknown/mixed entity types [52.0%]; Korea Electric Power Corp [29.0%]; SK Gas Co Ltd [19.0%]	34.9049	128.125	exact	Hai-myeon	Geumseong	Hadong	South Gyeongsang	https://www.gem.wiki/Goseong_Green_power_station	L100000103484	G100000103107	KR7015760002	0.29	2080	2080	3	2061	2101	2141	0	301.6	301.6	301.6	301.6	301.6	301.6	301.6	301.6	301.6	301.6	301.6
coal	South Korea	Asia	Eastern Asia	Hadong power station	Unit 1	하동 발전소	하동 발전소	500	operating	1997	2026	supercritical	bituminous					Korea Southern Power [100%]	Korea Electric Power Corp [100.0%]	34.9524	127.82	exact	Gadeok	Geumseong	Hadong	South Gyeongsang	https://www.gem.wiki/Hadong_power_station	L100000103485	G100000103526	KR7015760002	1	7000		27	2037	2077	2117	500	500	500	500	500	500	500	500	500	500	500	500
coal	South Korea	Asia	Eastern Asia	Hadong power station	Unit 2	하동 발전소	하동 발전소	500	operating	1997	2027	supercritical	bituminous					Korea Southern Power [100%]	Korea Electric Power Corp [100.0%]	34.9524	127.82	exact	Gadeok	Geumseong	Hadong	South Gyeongsang	https://www.gem.wiki/Hadong_power_station	L100000103485	G100000103527	KR7015760002	1	7000		27	2037	2077	2117	500	500	500	500	500	500	500	500	500	500	500	500
coal	South Korea	Asia	Eastern Asia	Hadong power station	Unit 3	하동 발전소	하동 발전소	500	operating	1998	2028	supercritical	bituminous					Korea Southern Power [100%]	Korea Electric Power Corp [100.0%]	34.9524	127.82	exact	Gadeok	Geumseong	Hadong	South Gyeongsang	https://www.gem.wiki/Hadong_power_station	L100000103485	G100000103528	KR7015760002	1	7000		26	2038	2078	2118	500	500	500	500	500	500	500	500	500	500	500	500
coal	South Korea	Asia	Eastern Asia	Hadong power station	Unit 4	하동 발전소	하동 발전소	500	operating	1999	2028	supercritical	bituminous					Korea Southern Power [100%]	Korea Electric Power Corp [100.0%]	34.9524	127.82	exact	Gadeok	Geumseong	Hadong	South Gyeongsang	https://www.gem.wiki/Hadong_power_station	L100000103485	G100000103529	KR7015760002	1	7000		25	2039	2079	2119	500	500	500	500	500	500	500	500	500	500	500	500
coal	South Korea	Asia	Eastern Asia	Hadong power station	Unit 5	하동 발전소	하동 발전소	500	operating	2000	2031	supercritical	bituminous					Korea Southern Power [100%]	Korea Electric Power Corp [100.0%]	34.9524	127.82	exact	Gadeok	Geumseong	Hadong	South Gyeongsang	https://www.gem.wiki/Hadong_power_station	L100000103485	G100000103530	KR7015760002	1	7000		24	2040	2080	2120	500	500	500	500	500	500	500	500	500	500	500	500
coal	South Korea	Asia	Eastern Asia	Hadong power station	Unit 6	하동 발전소	하동 발전소	500	operating	2001	2031	supercritical	bituminous					Korea Southern Power [100%]	Korea Electric Power Corp [100.0%]	34.9524	127.82	exact	Gadeok	Geumseong	Hadong	South Gyeongsang	https://www.gem.wiki/Hadong_power_station	L100000103485	G100000103531	KR7015760002	1	7000		23	2041	2081	2121	500	500	500	500	500	500	500	500	500	500	500	500
coal	South Korea	Asia	Eastern Asia	Hadong power station	Unit 7	하동 발전소	하동 발전소	500	operating	2008	2038	ultra-supercritical	bituminous					Korea Southern Power [100%]	Korea Electric Power Corp [100.0%]	34.9524	127.82	exact	Gadeok	Geumseong	Hadong	South Gyeongsang	https://www.gem.wiki/Hadong_power_station	L100000103485	G100000103532	KR7015760002	1	7000		16	2048	2088	2128	500	500	500	500	500	500	500	500	500	500	500	500
coal	South Korea	Asia	Eastern Asia	Hadong power station	Unit 8	하동 발전소	하동 발전소	500	operating	2009	2039	ultra-supercritical	bituminous					Korea Southern Power [100%]	Korea Electric Power Corp [100.0%]	34.9524	127.82	exact	Gadeok	Geumseong	Hadong	South Gyeongsang	https://www.gem.wiki/Hadong_power_station	L100000103485	G100000103533	KR7015760002	1	7000	7000	15	2049	2089	2129	500	500	500	500	500	500	500	500	500	500	500	500
coal	China	Asia	Eastern Asia	High River power station	Unit 1	潞安长子高河低热值煤电厂		660	operating	2021		ultra-supercritical	waste coal					Shanxi Luguang Power Generation [100%]	An Hui Wenergy Co Ltd [50.0%]; Shanxi State-Owned Capital Investment and Operation Co Ltd [21.2%]; KEPCO Shanxi International [17.0%]; KEPCO Woori sprott Global Prive [4.0%]; Power Development [3.5%]; Shanxi Gemeng International Energy Group Co Ltd [2.4%]; other [2.0%]	36.1651	112.962	exact	Gaohe	Changzi	Changzhi	Shanxi	https://www.gem.wiki/High_River_power_station	L100000101468	G100000103885	KR7015760002	0.17	1320		3	2061	2101	2141	0	112.2	112.2	112.2	112.2	112.2	112.2	112.2	112.2	112.2	112.2	112.2
coal	China	Asia	Eastern Asia	High River power station	Unit 2	潞安长子高河低热值煤电厂		660	operating	2021		ultra-supercritical	waste coal					Shanxi Luguang Power Generation [100%]	An Hui Wenergy Co Ltd [50.0%]; Shanxi State-Owned Capital Investment and Operation Co Ltd [21.2%]; KEPCO Shanxi International [17.0%]; KEPCO Woori sprott Global Prive [4.0%]; Power Development [3.5%]; Shanxi Gemeng International Energy Group Co Ltd [2.4%]; other [2.0%]	36.1651	112.962	exact	Gaohe	Changzi	Changzhi	Shanxi	https://www.gem.wiki/High_River_power_station	L100000101468	G100000103886	KR7015760002	0.17	1320	1320	3	2061	2101	2141	0	112.2	112.2	112.2	112.2	112.2	112.2	112.2	112.2	112.2	112.2	112.2
coal	South Korea	Asia	Eastern Asia	Honam power station	Unit 1	호남	호남 1 (Unit 1), 호남 2 (Unit 2)	250	retired	1973	2021	subcritical	bituminous					Korea East-West Power [100%]	Korea Electric Power Corp [100.0%]	34.8544	127.735	exact		Wolnae	Yeosu	North Jeolla	https://www.gem.wiki/Honam_power_station	L100000103472	G100000103929	KR7015760002	1	500		51	2013	2053	2093	250	0	0	0	0	0	0	0	0	0	0	0
coal	South Korea	Asia	Eastern Asia	Honam power station	Unit 2	호남	호남 1 (Unit 1), 호남 2 (Unit 2)	250	retired	1973	2021	subcritical	bituminous					Korea East-West Power [100%]	Korea Electric Power Corp [100.0%]	34.8544	127.735	exact		Wolnae	Yeosu	North Jeolla	https://www.gem.wiki/Honam_power_station	L100000103472	G100000103930	KR7015760002	1	500	500	51	2013	2053	2093	250	0	0	0	0	0	0	0	0	0	0	0
coal	China	Asia	Eastern Asia	Jiexiu Chongguang power station	Unit 1	山西国际能源介休崇光低热值煤电厂	Jiexiu Gangue power station	350	operating	2020		supercritical	waste coal					Shanxi Chongguang Power Generation [100%]	Shanxi Anyi Hongshan PORCELAIN Co Ltd [22.5%]; Jiexiu Yihong Investment Co Ltd [21.6%]; Shanxi State-Owned Capital Investment and Operation Co Ltd [21.6%]; KEPCO Shanxi International [17.3%]; Shanxi Ansheng Technology Development Co Ltd [4.9%]; KEPCO Woori sprott Global Prive [4.1%]; Power Development [3.6%]; Shanxi Gemeng International Energy Group Co Ltd [2.4%]; other [2.0%]	37.1065	111.996	exact	Yian Town	Jiexiu	Jinzhong	Shanxi	https://www.gem.wiki/Jiexiu_Chongguang_power_station	L100000101486	G100000105165	KR7015760002	0.173	700		4	2060	2100	2140	60.55	60.55	60.55	60.55	60.55	60.55	60.55	60.55	60.55	60.55	60.55	60.55
coal	China	Asia	Eastern Asia	Jiexiu Chongguang power station	Unit 2	山西国际能源介休崇光低热值煤电厂	Jiexiu Gangue power station	350	operating	2021		supercritical	waste coal					Shanxi Chongguang Power Generation [100%]	Shanxi Anyi Hongshan PORCELAIN Co Ltd [22.5%]; Jiexiu Yihong Investment Co Ltd [21.6%]; Shanxi State-Owned Capital Investment and Operation Co Ltd [21.6%]; KEPCO Shanxi International [17.3%]; Shanxi Ansheng Technology Development Co Ltd [4.9%]; KEPCO Woori sprott Global Prive [4.1%]; Power Development [3.6%]; Shanxi Gemeng International Energy Group Co Ltd [2.4%]; other [2.0%]	37.1065	111.996	exact	Yian Town	Jiexiu	Jinzhong	Shanxi	https://www.gem.wiki/Jiexiu_Chongguang_power_station	L100000101486	G100000105166	KR7015760002	0.173	700		3	2061	2101	2141	0	60.55	60.55	60.55	60.55	60.55	60.55	60.55	60.55	60.55	60.55	60.55
coal	China	Asia	Eastern Asia	Lingshi Qiguang power station	Unit 1	山西国际能源灵石启光低热值煤发电厂		350	operating	2019		supercritical	waste coal					Shanxi Qiguang Power Generation [100%]	Lingshi Deguangyi Investment and Trade Co Ltd [24.1%]; Lingshi Xinyuan Investment and Trade Co Ltd [24.1%]; Shanxi State-Owned Capital Investment and Operation Co Ltd [21.6%]; KEPCO Shanxi International [17.3%]; KEPCO Woori sprott Global Prive [4.1%]; Power Development [3.6%]; other [2.8%]; Shanxi Gemeng International Energy Group Co Ltd [2.4%]	36.8206	111.626	exact	Duanchun Town	Lingshi	Jinzhong	Shanxi	https://www.gem.wiki/Lingshi_Qiguang_power_station	L100000101492	G100000106307	KR7015760002	0.173	700		5	2059	2099	2139	60.55	60.55	60.55	60.55	60.55	60.55	60.55	60.55	60.55	60.55	60.55	60.55
coal	China	Asia	Eastern Asia	Lingshi Qiguang power station	Unit 2	山西国际能源灵石启光低热值煤发电厂		350	operating	2019		supercritical	waste coal					Shanxi Qiguang Power Generation [100%]	Lingshi Deguangyi Investment and Trade Co Ltd [24.1%]; Lingshi Xinyuan Investment and Trade Co Ltd [24.1%]; Shanxi State-Owned Capital Investment and Operation Co Ltd [21.6%]; KEPCO Shanxi International [17.3%]; KEPCO Woori sprott Global Prive [4.1%]; Power Development [3.6%]; other [2.8%]; Shanxi Gemeng International Energy Group Co Ltd [2.4%]	36.8206	111.626	exact	Duanchun Town	Lingshi	Jinzhong	Shanxi	https://www.gem.wiki/Lingshi_Qiguang_power_station	L100000101492	G100000106308	KR7015760002	0.173	700	700	5	2059	2099	2139	60.55	60.55	60.55	60.55	60.55	60.55	60.55	60.55	60.55	60.55	60.55	60.55
coal	Vietnam	Asia	South-eastern Asia	Nghi Son power station	Phase 2 Unit 1			660	operating	2022		supercritical	bituminous					Nghi Son 2 Power [100%]	Korea Electric Power Corp [50.0%]; Marubeni Corp [40.0%]; Tohoku Electric Power Co Inc [10.0%]	19.3158	105.8	exact	Nghi Son Economic Zone	Hai Ha	Tinh Gia	Thanh Hoa	https://www.gem.wiki/Nghi_Son_power_station	L100000104345	G100000107412	KR7015760002	0.5	1320		2	2062	2102	2142	0	0	330	330	330	330	330	330	330	330	330	330
coal	Vietnam	Asia	South-eastern Asia	Nghi Son power station	Phase 2 Unit 2			660	operating	2022		supercritical	bituminous					Nghi Son 2 Power [100%]	Korea Electric Power Corp [50.0%]; Marubeni Corp [40.0%]; Tohoku Electric Power Co Inc [10.0%]	19.3158	105.8	exact	Nghi Son Economic Zone	Hai Ha	Tinh Gia	Thanh Hoa	https://www.gem.wiki/Nghi_Son_power_station	L100000104345	G100000107413	KR7015760002	0.5	1320	1320	2	2062	2102	2142	0	0	330	330	330	330	330	330	330	330	330	330
coal	China	Asia	Eastern Asia	Pingshuo Gangue power station	Unit 3	山西国际能源平朔煤矸石发电厂		300	operating	2009		subcritical	waste coal					Shanxi Pingshuo Gangue Power Generation [100%]	China Coal Pingshuo Coal Industry [33.0%]; Shanxi State-Owned Capital Investment and Operation Co Ltd [28.3%]; KEPCO Shanxi International [22.8%]; KEPCO Woori sprott Global Prive [5.4%]; Power Development [4.7%]; Shanxi Gemeng International Energy Group Co Ltd [3.1%]; other [2.7%]	39.4728	112.323	exact	Pinglu	Pinglu	Shuozhou	Shanxi	https://www.gem.wiki/Pingshuo_Gangue_power_station	L100000101501	G100000108005	KR7015760002	0.228	600		15	2049	2089	2129	68.4	68.4	68.4	68.4	68.4	68.4	68.4	68.4	68.4	68.4	68.4	68.4
coal	China	Asia	Eastern Asia	Pingshuo Gangue power station	Unit 4	山西国际能源平朔煤矸石发电厂		300	operating	2009		subcritical	waste coal					Shanxi Pingshuo Gangue Power Generation [100%]	China Coal Pingshuo Coal Industry [33.0%]; Shanxi State-Owned Capital Investment and Operation Co Ltd [28.3%]; KEPCO Shanxi International [22.8%]; KEPCO Woori sprott Global Prive [5.4%]; Power Development [4.7%]; Shanxi Gemeng International Energy Group Co Ltd [3.1%]; other [2.7%]	39.4728	112.323	exact	Pinglu	Pinglu	Shuozhou	Shanxi	https://www.gem.wiki/Pingshuo_Gangue_power_station	L100000101501	G100000108006	KR7015760002	0.228	600	600	15	2049	2089	2129	68.4	68.4	68.4	68.4	68.4	68.4	68.4	68.4	68.4	68.4	68.4	68.4
coal	South Korea	Asia	Eastern Asia	Samcheok Green power station	Unit 1	삼척그린파워	삼척그린파워	1022	operating	2016	2046	ultra-supercritical	unknown					Korea Southern Power [100%]	Korea Electric Power Corp [100.0%]	37.186	129.342	exact	Hosan	Wondeok	Samcheok	Gangwon	https://www.gem.wiki/Samcheok_Green_power_station	L100000103463	G100000108757	KR7015760002	1	2044		8	2056	2096	2136	1022	1022	1022	1022	1022	1022	1022	1022	1022	1022	1022	1022
coal	South Korea	Asia	Eastern Asia	Samcheok Green power station	Unit 2	삼척그린파워	삼척그린파워	1022	operating	2017	2047	ultra-supercritical	unknown					Korea Southern Power [100%]	Korea Electric Power Corp [100.0%]	37.186	129.342	exact	Hosan	Wondeok	Samcheok	Gangwon	https://www.gem.wiki/Samcheok_Green_power_station	L100000103463	G100000108758	KR7015760002	1	2044	2044	7	2057	2097	2137	1022	1022	1022	1022	1022	1022	1022	1022	1022	1022	1022	1022
coal	South Korea	Asia	Eastern Asia	Samchonpo power station	Unit 1	삼천포 발전소	Samcheonpo power station, 삼천포 발전소	560	retired	1983	2021	subcritical	bituminous					Korea South-East Power [100%]	Korea Electric Power Corp [100.0%]	34.9107	128.108	exact	Deokho	Hai	Goseong	South Gyeongsang	https://www.gem.wiki/Samchonpo_power_station	L100000103487	G100000108759	KR7015760002	1	5360		41	2023	2063	2103	560	0	0	0	0	0	0	0	0	0	0	0
coal	South Korea	Asia	Eastern Asia	Samchonpo power station	Unit 2	삼천포 발전소	Samcheonpo power station, 삼천포 발전소	560	retired	1984	2021	subcritical	bituminous					Korea South-East Power [100%]	Korea Electric Power Corp [100.0%]	34.9107	128.108	exact	Deokho	Hai	Goseong	South Gyeongsang	https://www.gem.wiki/Samchonpo_power_station	L100000103487	G100000108760	KR7015760002	1	5360		40	2024	2064	2104	560	0	0	0	0	0	0	0	0	0	0	0
coal	South Korea	Asia	Eastern Asia	Samchonpo power station	Unit 3	삼천포 발전소	Samcheonpo power station, 삼천포 발전소	560	operating	1993	2024	subcritical	bituminous					Korea South-East Power [100%]	Korea Electric Power Corp [100.0%]	34.9107	128.108	exact	Deokho	Hai	Goseong	South Gyeongsang	https://www.gem.wiki/Samchonpo_power_station	L100000103487	G100000108761	KR7015760002	1	5360		31	2033	2073	2113	560	560	560	560	560	560	560	560	560	560	560	560
coal	South Korea	Asia	Eastern Asia	Samchonpo power station	Unit 4	삼천포 발전소	Samcheonpo power station, 삼천포 발전소	560	operating	1994	2024	subcritical	bituminous					Korea South-East Power [100%]	Korea Electric Power Corp [100.0%]	34.9107	128.108	exact	Deokho	Hai	Goseong	South Gyeongsang	https://www.gem.wiki/Samchonpo_power_station	L100000103487	G100000108762	KR7015760002	1	5360		30	2034	2074	2114	560	560	560	560	560	560	560	560	560	560	560	560
coal	South Korea	Asia	Eastern Asia	Samchonpo power station	Unit 5	삼천포 발전소	Samcheonpo power station, 삼천포 발전소	500	operating	1997	2027	supercritical	subbituminous					Korea South-East Power [100%]	Korea Electric Power Corp [100.0%]	34.9107	128.108	exact	Deokho	Hai	Goseong	South Gyeongsang	https://www.gem.wiki/Samchonpo_power_station	L100000103487	G100000108763	KR7015760002	1	5360		27	2037	2077	2117	500	500	500	500	500	500	500	500	500	500	500	500
coal	South Korea	Asia	Eastern Asia	Samchonpo power station	Unit 6	삼천포 발전소	Samcheonpo power station, 삼천포 발전소	500	operating	1998	2028	supercritical	subbituminous					Korea South-East Power [100%]	Korea Electric Power Corp [100.0%]	34.9107	128.108	exact	Deokho	Hai	Goseong	South Gyeongsang	https://www.gem.wiki/Samchonpo_power_station	L100000103487	G100000108764	KR7015760002	1	5360	5360	26	2038	2078	2118	500	500	500	500	500	500	500	500	500	500	500	500
coal	China	Asia	Eastern Asia	Shanxi Hepo power station	Unit 5	山西国际能源河坡发电厂		350	operating	2016		supercritical	unknown					Shanxi Hepo Power Generation [100%]	Shanxi State-Owned Capital Investment and Operation Co Ltd [39.6%]; KEPCO Shanxi International [31.8%]; KEPCO Woori sprott Global Prive [7.5%]; Power Development [6.5%]; Yangquan Economic and Trade Asset Operation Center [6.5%]; Shanxi Gemeng International Energy Group Co Ltd [4.4%]; other [3.7%]	37.9199	113.615	exact	Yingying Town Xiayan Villege Baiquan Industrial Park	Jiaoqu	Yangquan	Shanxi	https://www.gem.wiki/Shanxi_Hepo_power_station	L100000101509	G100000109047	KR7015760002	0.318	700		8	2056	2096	2136	111.3	111.3	111.3	111.3	111.3	111.3	111.3	111.3	111.3	111.3	111.3	111.3
coal	China	Asia	Eastern Asia	Shanxi Hepo power station	Unit 6	山西国际能源河坡发电厂		350	operating	2016		supercritical	unknown					Shanxi Hepo Power Generation [100%]	Shanxi State-Owned Capital Investment and Operation Co Ltd [39.6%]; KEPCO Shanxi International [31.8%]; KEPCO Woori sprott Global Prive [7.5%]; Power Development [6.5%]; Yangquan Economic and Trade Asset Operation Center [6.5%]; Shanxi Gemeng International Energy Group Co Ltd [4.4%]; other [3.7%]	37.9199	113.615	exact	Yingying Town Xiayan Villege Baiquan Industrial Park	Jiaoqu	Yangquan	Shanxi	https://www.gem.wiki/Shanxi_Hepo_power_station	L100000101509	G100000109048	KR7015760002	0.318	700	700	8	2056	2096	2136	111.3	111.3	111.3	111.3	111.3	111.3	111.3	111.3	111.3	111.3	111.3	111.3
coal	China	Asia	Eastern Asia	Shanxi Liulin power station	Phase I Unit 1	山西国际能源柳林发电厂	Liulin Liansheng power station, Liulin Huaguang power station (Phase I Unit 1, Phase I Unit 2), Liulin Huaguang power station 柳林华光热电厂 (Phase II Unit 3, Phase II Unit 4)	100	operating	1995		subcritical	unknown					Shanxi Liulin Electric Power [100%]	Shanxi State-Owned Capital Investment and Operation Co Ltd [42.3%]; KEPCO Shanxi International [34.0%]; KEPCO Woori sprott Global Prive [8.0%]; Power Development [7.0%]; Shanxi Gemeng International Energy Group Co Ltd [4.7%]; other [4.0%]	37.4185	110.824	exact	Xuecun Town	Liulin	Lüliang	Shanxi	https://www.gem.wiki/Shanxi_Liulin_power_station	L100000105027	G100000106344	KR7015760002	0.34	1400		29	2035	2075	2115	34	34	34	34	34	34	34	34	34	34	34	34
coal	China	Asia	Eastern Asia	Shanxi Liulin power station	Phase I Unit 2	山西国际能源柳林发电厂	Liulin Liansheng power station, Liulin Huaguang power station (Phase I Unit 1, Phase I Unit 2), Liulin Huaguang power station 柳林华光热电厂 (Phase II Unit 3, Phase II Unit 4)	100	operating	1996		subcritical	unknown					Shanxi Liulin Electric Power [100%]	Shanxi State-Owned Capital Investment and Operation Co Ltd [42.3%]; KEPCO Shanxi International [34.0%]; KEPCO Woori sprott Global Prive [8.0%]; Power Development [7.0%]; Shanxi Gemeng International Energy Group Co Ltd [4.7%]; other [4.0%]	37.4185	110.824	exact	Xuecun Town	Liulin	Lüliang	Shanxi	https://www.gem.wiki/Shanxi_Liulin_power_station	L100000105027	G100000106345	KR7015760002	0.34	1400		28	2036	2076	2116	34	34	34	34	34	34	34	34	34	34	34	34
coal	China	Asia	Eastern Asia	Shanxi Liulin power station	Phase II Unit 3	山西国际能源柳林发电厂	Liulin Liansheng power station, Liulin Huaguang power station (Phase I Unit 1, Phase I Unit 2), Liulin Huaguang power station 柳林华光热电厂 (Phase II Unit 3, Phase II Unit 4)	600	operating	2008		subcritical	unknown					Shanxi Huaguang Power Generation [100%]	China Huaneng Group Co Ltd [40.0%]; Shanxi State-Owned Capital Investment and Operation Co Ltd [21.2%]; KEPCO Shanxi International [17.0%]; Shanxi Coking Coal Energy Group Co Ltd [10.0%]; KEPCO Woori sprott Global Prive [4.0%]; Power Development [3.5%]; Shanxi Gemeng International Energy Group Co Ltd [2.4%]; other [2.0%]	37.4185	110.824	exact	Xuecun Town	Liulin	Lüliang	Shanxi	https://www.gem.wiki/Shanxi_Liulin_power_station	L100000105027	G100000106346	KR7015760002	0.17	1400		16	2048	2088	2128	102	102	102	102	102	102	102	102	102	102	102	102
coal	China	Asia	Eastern Asia	Shanxi Liulin power station	Phase II Unit 4	山西国际能源柳林发电厂	Liulin Liansheng power station, Liulin Huaguang power station (Phase I Unit 1, Phase I Unit 2), Liulin Huaguang power station 柳林华光热电厂 (Phase II Unit 3, Phase II Unit 4)	600	operating	2008		subcritical	unknown					Shanxi Huaguang Power Generation [100%]	China Huaneng Group Co Ltd [40.0%]; Shanxi State-Owned Capital Investment and Operation Co Ltd [21.2%]; KEPCO Shanxi International [17.0%]; Shanxi Coking Coal Energy Group Co Ltd [10.0%]; KEPCO Woori sprott Global Prive [4.0%]; Power Development [3.5%]; Shanxi Gemeng International Energy Group Co Ltd [2.4%]; other [2.0%]	37.4185	110.824	exact	Xuecun Town	Liulin	Lüliang	Shanxi	https://www.gem.wiki/Shanxi_Liulin_power_station	L100000105027	G100000106347	KR7015760002	0.17	1400	1400	16	2048	2088	2128	102	102	102	102	102	102	102	102	102	102	102	102
coal	China	Asia	Eastern Asia	Shanxi Ruiguang power station	Phase I Unit 1	山西国际能源瑞光热电公司热电联产		330	operating	2011		subcritical	bituminous					Shanxi Ruiguang Power [100%]	Shanxi State-Owned Capital Investment and Operation Co Ltd [42.3%]; KEPCO Shanxi International [34.0%]; KEPCO Woori sprott Global Prive [8.0%]; Power Development [7.0%]; Shanxi Gemeng International Energy Group Co Ltd [4.7%]; other [4.0%]	37.7846	112.72	exact	Wujinshan	Yuci	Jinzhong	Shanxi	https://www.gem.wiki/Shanxi_Ruiguang_power_station	L100000101511	G100000109051	KR7015760002	0.34	660		13	2051	2091	2131	112.2	112.2	112.2	112.2	112.2	112.2	112.2	112.2	112.2	112.2	112.2	112.2
coal	China	Asia	Eastern Asia	Shanxi Ruiguang power station	Phase I Unit 2	山西国际能源瑞光热电公司热电联产		330	operating	2012		subcritical	bituminous					Shanxi Ruiguang Power [100%]	Shanxi State-Owned Capital Investment and Operation Co Ltd [42.3%]; KEPCO Shanxi International [34.0%]; KEPCO Woori sprott Global Prive [8.0%]; Power Development [7.0%]; Shanxi Gemeng International Energy Group Co Ltd [4.7%]; other [4.0%]	37.7846	112.72	exact	Wujinshan	Yuci	Jinzhong	Shanxi	https://www.gem.wiki/Shanxi_Ruiguang_power_station	L100000101511	G100000109052	KR7015760002	0.34	660	660	12	2052	2092	2132	112.2	112.2	112.2	112.2	112.2	112.2	112.2	112.2	112.2	112.2	112.2	112.2
coal	China	Asia	Eastern Asia	Shanxi Yuguang power station	Phase I Unit 1	山西山阴煤矸石发电	Shanxi Shanyin power station, 昱光（山阴）煤矸石综合利用发电项目一期 (Phase I Unit 1, Phase I Unit 2), 昱光（山阴）煤矸石综合利用发电项目二期 (Phase II Unit 3, Phase II Unit 4)	300	operating	2012		subcritical	waste coal					Shanxi Yuguang Power Generation [100%]	Shanxi State-Owned Capital Investment and Operation Co Ltd [25.4%]; China National Coal Group [24.0%]; KEPCO Shanxi International [20.4%]; Beijing Ward Financial Investment Holding Co Ltd [15.5%]; KEPCO Woori sprott Global Prive [4.8%]; Power Development [4.2%]; other [2.9%]; Shanxi Gemeng International Energy Group Co Ltd [2.8%]	39.6159	112.799	exact	Beizhouzhuang	Shanyin	Shuozhou	Shanxi	https://www.gem.wiki/Shanxi_Yuguang_power_station	L100000101514	G100000109057	KR7015760002	0.204	1300		12	2052	2092	2132	61.2	61.2	61.2	61.2	61.2	61.2	61.2	61.2	61.2	61.2	61.2	61.2
coal	China	Asia	Eastern Asia	Shanxi Yuguang power station	Phase I Unit 2	山西山阴煤矸石发电	Shanxi Shanyin power station, 昱光（山阴）煤矸石综合利用发电项目一期 (Phase I Unit 1, Phase I Unit 2), 昱光（山阴）煤矸石综合利用发电项目二期 (Phase II Unit 3, Phase II Unit 4)	300	operating	2012		subcritical	waste coal					Shanxi Yuguang Power Generation [100%]	Shanxi State-Owned Capital Investment and Operation Co Ltd [25.4%]; China National Coal Group [24.0%]; KEPCO Shanxi International [20.4%]; Beijing Ward Financial Investment Holding Co Ltd [15.5%]; KEPCO Woori sprott Global Prive [4.8%]; Power Development [4.2%]; other [2.9%]; Shanxi Gemeng International Energy Group Co Ltd [2.8%]	39.6159	112.799	exact	Beizhouzhuang	Shanyin	Shuozhou	Shanxi	https://www.gem.wiki/Shanxi_Yuguang_power_station	L100000101514	G100000109058	KR7015760002	0.204	1300		12	2052	2092	2132	61.2	61.2	61.2	61.2	61.2	61.2	61.2	61.2	61.2	61.2	61.2	61.2
coal	China	Asia	Eastern Asia	Shanxi Yuguang power station	Phase II Unit 3	山西山阴煤矸石发电	Shanxi Shanyin power station, 昱光（山阴）煤矸石综合利用发电项目一期 (Phase I Unit 1, Phase I Unit 2), 昱光（山阴）煤矸石综合利用发电项目二期 (Phase II Unit 3, Phase II Unit 4)	350	operating	2019		supercritical	waste coal					Shanxi Yuguang Power Generation [100%]	Shanxi State-Owned Capital Investment and Operation Co Ltd [25.4%]; China National Coal Group [24.0%]; KEPCO Shanxi International [20.4%]; Beijing Ward Financial Investment Holding Co Ltd [15.5%]; KEPCO Woori sprott Global Prive [4.8%]; Power Development [4.2%]; other [2.9%]; Shanxi Gemeng International Energy Group Co Ltd [2.8%]	39.6159	112.799	exact	Beizhouzhuang	Shanyin	Shuozhou	Shanxi	https://www.gem.wiki/Shanxi_Yuguang_power_station	L100000101514	G100000109059	KR7015760002	0.204	1300		5	2059	2099	2139	71.4	71.4	71.4	71.4	71.4	71.4	71.4	71.4	71.4	71.4	71.4	71.4
coal	China	Asia	Eastern Asia	Shanxi Yuguang power station	Phase II Unit 4	山西山阴煤矸石发电	Shanxi Shanyin power station, 昱光（山阴）煤矸石综合利用发电项目一期 (Phase I Unit 1, Phase I Unit 2), 昱光（山阴）煤矸石综合利用发电项目二期 (Phase II Unit 3, Phase II Unit 4)	350	operating	2019		supercritical	waste coal					Shanxi Yuguang Power Generation [100%]	Shanxi State-Owned Capital Investment and Operation Co Ltd [25.4%]; China National Coal Group [24.0%]; KEPCO Shanxi International [20.4%]; Beijing Ward Financial Investment Holding Co Ltd [15.5%]; KEPCO Woori sprott Global Prive [4.8%]; Power Development [4.2%]; other [2.9%]; Shanxi Gemeng International Energy Group Co Ltd [2.8%]	39.6159	112.799	exact	Beizhouzhuang	Shanyin	Shuozhou	Shanxi	https://www.gem.wiki/Shanxi_Yuguang_power_station	L100000101514	G100000109060	KR7015760002	0.204	1300	1300	5	2059	2099	2139	71.4	71.4	71.4	71.4	71.4	71.4	71.4	71.4	71.4	71.4	71.4	71.4
coal	China	Asia	Eastern Asia	Shanxi Zhaoguang power station	Unit 1	山西国际能源兆光发电厂		300	operating	2005		subcritical	bituminous					Shanxi Zhaoguang Power Generation [100%]	Shanxi State-Owned Capital Investment and Operation Co Ltd [42.3%]; KEPCO Shanxi International [34.0%]; KEPCO Woori sprott Global Prive [8.0%]; Power Development [7.0%]; Shanxi Gemeng International Energy Group Co Ltd [4.7%]; other [4.0%]	36.5538	111.692	exact	Bailong	Huozhou	Linfen	Shanxi	https://www.gem.wiki/Shanxi_Zhaoguang_power_station	L100000101515	G100000109061	KR7015760002	0.34	1800		19	2045	2085	2125	102	102	102	102	102	102	102	102	102	102	102	102
coal	China	Asia	Eastern Asia	Shanxi Zhaoguang power station	Unit 2	山西国际能源兆光发电厂		300	operating	2005		subcritical	bituminous					Shanxi Zhaoguang Power Generation [100%]	Shanxi State-Owned Capital Investment and Operation Co Ltd [42.3%]; KEPCO Shanxi International [34.0%]; KEPCO Woori sprott Global Prive [8.0%]; Power Development [7.0%]; Shanxi Gemeng International Energy Group Co Ltd [4.7%]; other [4.0%]	36.5538	111.692	exact	Bailong	Huozhou	Linfen	Shanxi	https://www.gem.wiki/Shanxi_Zhaoguang_power_station	L100000101515	G100000109062	KR7015760002	0.34	1800		19	2045	2085	2125	102	102	102	102	102	102	102	102	102	102	102	102
coal	China	Asia	Eastern Asia	Shanxi Zhaoguang power station	Unit 3	山西国际能源兆光发电厂		600	operating	2009		supercritical	bituminous					Shanxi Zhaoguang Power Generation [100%]	Shanxi State-Owned Capital Investment and Operation Co Ltd [42.3%]; KEPCO Shanxi International [34.0%]; KEPCO Woori sprott Global Prive [8.0%]; Power Development [7.0%]; Shanxi Gemeng International Energy Group Co Ltd [4.7%]; other [4.0%]	36.5538	111.692	exact	Bailong	Huozhou	Linfen	Shanxi	https://www.gem.wiki/Shanxi_Zhaoguang_power_station	L100000101515	G100000109063	KR7015760002	0.34	1800		15	2049	2089	2129	204	204	204	204	204	204	204	204	204	204	204	204
coal	China	Asia	Eastern Asia	Shanxi Zhaoguang power station	Unit 4	山西国际能源兆光发电厂		600	operating	2009		supercritical	bituminous					Shanxi Zhaoguang Power Generation [100%]	Shanxi State-Owned Capital Investment and Operation Co Ltd [42.3%]; KEPCO Shanxi International [34.0%]; KEPCO Woori sprott Global Prive [8.0%]; Power Development [7.0%]; Shanxi Gemeng International Energy Group Co Ltd [4.7%]; other [4.0%]	36.5538	111.692	exact	Bailong	Huozhou	Linfen	Shanxi	https://www.gem.wiki/Shanxi_Zhaoguang_power_station	L100000101515	G100000109064	KR7015760002	0.34	1800	1800	15	2049	2089	2129	204	204	204	204	204	204	204	204	204	204	204	204
coal	South Korea	Asia	Eastern Asia	Shin Boryeong power station	Unit 1	신보령화력	Sin Boryeong power station, Shin Poryong power station, f	1000	operating	2017	2047	ultra-supercritical	bituminous					Korea Midland Power [100%]	Korea Electric Power Corp [100.0%]	36.3846	126.486	exact	Poryong-gun	Ocheon	Poryong	South Chungcheong	https://www.gem.wiki/Shin_Boryeong_power_station	L100000103482	G100000109277	KR7015760002	1	2000		7	2057	2097	2137	1000	1000	1000	1000	1000	1000	1000	1000	1000	1000	1000	1000
coal	South Korea	Asia	Eastern Asia	Shin Boryeong power station	Unit 2	신보령화력	Sin Boryeong power station, Shin Poryong power station, f	1000	operating	2017	2047	ultra-supercritical	bituminous					Korea Midland Power [100%]	Korea Electric Power Corp [100.0%]	36.3846	126.486	exact	Poryong-gun	Ocheon	Poryong	South Chungcheong	https://www.gem.wiki/Shin_Boryeong_power_station	L100000103482	G100000109269	KR7015760002	1	2000	2000	7	2057	2097	2137	1000	1000	1000	1000	1000	1000	1000	1000	1000	1000	1000	1000
coal	South Korea	Asia	Eastern Asia	Shin Seocheon power station	--	신서천 발전소	Sin Seocheon power station, New Seocheon power station, 신서천 발전소	1018	operating	2021	2051	ultra-supercritical	bituminous					Korea Midland Power [100%]	Korea Electric Power Corp [100.0%]	36.1441	126.496	exact	Maryang-ri	Seocheon		South Chungcheong	https://www.gem.wiki/Shin_Seocheon_power_station	L100000104888	G100000108918	KR7015760002	1	1018	1018	3	2061	2101	2141	0	1018	1018	1018	1018	1018	1018	1018	1018	1018	1018	1018
coal	Indonesia	Asia	South-eastern Asia	Tabalong power station	Unit 1		Kalsel FTP2	100	operating	2019		subcritical	lignite					PT Tanjung Power Indonesia [100%]	PT Adaro Power [65.0%]; Korea Electric Power Corp [35.0%]	-2.16343	115.441	exact	Adaro's Tanjung coal mine		Tabalong	South Kalimantan	https://www.gem.wiki/Tabalong_power_station	L100000102785	G100000109790	KR7015760002	0.35	200		5	2059	2099	2139	35	35	35	35	35	35	35	35	35	35	35	35
coal	Indonesia	Asia	South-eastern Asia	Tabalong power station	Unit 2		Kalsel FTP2	100	operating	2019		subcritical	lignite					PT Tanjung Power Indonesia [100%]	PT Adaro Power [65.0%]; Korea Electric Power Corp [35.0%]	-2.16343	115.441	exact	Adaro's Tanjung coal mine		Tabalong	South Kalimantan	https://www.gem.wiki/Tabalong_power_station	L100000102785	G100000109791	KR7015760002	0.35	200	200	5	2059	2099	2139	35	35	35	35	35	35	35	35	35	35	35	35
coal	South Korea	Asia	Eastern Asia	Taean power station	Unit 1	태안화력	태안화력	500	operating	1995	2025	supercritical	bituminous					Korea Western Power [100%]	Korea Electric Power Corp [100.0%]	36.9033	126.234	exact	Banggal	Wonbuk	Taean	South Chungcheong	https://www.gem.wiki/Taean_power_station	L100000103483	G100000109801	KR7015760002	1	9446		29	2035	2075	2115	500	500	500	500	500	500	500	500	500	500	500	500
coal	South Korea	Asia	Eastern Asia	Taean power station	Unit 2	태안화력	태안화력	500	operating	1996	2025	supercritical	bituminous					Korea Western Power [100%]	Korea Electric Power Corp [100.0%]	36.9033	126.234	exact	Banggal	Wonbuk	Taean	South Chungcheong	https://www.gem.wiki/Taean_power_station	L100000103483	G100000109803	KR7015760002	1	9446		28	2036	2076	2116	500	500	500	500	500	500	500	500	500	500	500	500
coal	South Korea	Asia	Eastern Asia	Taean power station	Unit 3	태안화력	태안화력	500	operating	1997	2028	supercritical	bituminous					Korea Western Power [100%]	Korea Electric Power Corp [100.0%]	36.9033	126.234	exact	Banggal	Wonbuk	Taean	South Chungcheong	https://www.gem.wiki/Taean_power_station	L100000103483	G100000109804	KR7015760002	1	9446		27	2037	2077	2117	500	500	500	500	500	500	500	500	500	500	500	500
coal	South Korea	Asia	Eastern Asia	Taean power station	Unit 4	태안화력	태안화력	500	operating	1997	2029	supercritical	bituminous					Korea Western Power [100%]	Korea Electric Power Corp [100.0%]	36.9033	126.234	exact	Banggal	Wonbuk	Taean	South Chungcheong	https://www.gem.wiki/Taean_power_station	L100000103483	G100000109805	KR7015760002	1	9446		27	2037	2077	2117	500	500	500	500	500	500	500	500	500	500	500	500
coal	South Korea	Asia	Eastern Asia	Taean power station	Unit 5	태안화력	태안화력	500	operating	2001	2032	supercritical	bituminous					Korea Western Power [100%]	Korea Electric Power Corp [100.0%]	36.9033	126.234	exact	Banggal	Wonbuk	Taean	South Chungcheong	https://www.gem.wiki/Taean_power_station	L100000103483	G100000109806	KR7015760002	1	9446		23	2041	2081	2121	500	500	500	500	500	500	500	500	500	500	500	500
coal	South Korea	Asia	Eastern Asia	Taean power station	Unit 6	태안화력	태안화력	500	operating	2002	2032	supercritical	bituminous					Korea Western Power [100%]	Korea Electric Power Corp [100.0%]	36.9033	126.234	exact	Banggal	Wonbuk	Taean	South Chungcheong	https://www.gem.wiki/Taean_power_station	L100000103483	G100000109807	KR7015760002	1	9446		22	2042	2082	2122	500	500	500	500	500	500	500	500	500	500	500	500
coal	South Korea	Asia	Eastern Asia	Taean power station	Unit 7	태안화력	태안화력	500	operating	2007	2037	ultra-supercritical	bituminous					Korea Western Power [100%]	Korea Electric Power Corp [100.0%]	36.9033	126.234	exact	Banggal	Wonbuk	Taean	South Chungcheong	https://www.gem.wiki/Taean_power_station	L100000103483	G100000109808	KR7015760002	1	9446		17	2047	2087	2127	500	500	500	500	500	500	500	500	500	500	500	500
coal	South Korea	Asia	Eastern Asia	Taean power station	Unit 8	태안화력	태안화력	500	operating	2007	2037	ultra-supercritical	bituminous					Korea Western Power [100%]	Korea Electric Power Corp [100.0%]	36.9033	126.234	exact	Banggal	Wonbuk	Taean	South Chungcheong	https://www.gem.wiki/Taean_power_station	L100000103483	G100000109809	KR7015760002	1	9446		17	2047	2087	2127	500	500	500	500	500	500	500	500	500	500	500	500
coal	South Korea	Asia	Eastern Asia	Taean power station	Unit 9	태안화력	태안화력	1050	operating	2016	2046	ultra-supercritical	bituminous					Korea Western Power [100%]	Korea Electric Power Corp [100.0%]	36.9056	126.235	exact	Banggal	Wonbuk	Taean	South Chungcheong	https://www.gem.wiki/Taean_power_station	L100000103483	G100000109810	KR7015760002	1	9446		8	2056	2096	2136	1050	1050	1050	1050	1050	1050	1050	1050	1050	1050	1050	1050
coal	South Korea	Asia	Eastern Asia	Taean power station	IGCC Project	태안화력	태안화력	346	operating	2016		IGCC	unknown					Korea Western Power [100%]	Korea Electric Power Corp [100.0%]	36.9056	126.235	exact	Banggal	Wonbuk	Taean	South Chungcheong	https://www.gem.wiki/Taean_power_station	L100000103483	G100000109800	KR7015760002	1	9446		8	2056	2096	2136	346	346	346	346	346	346	346	346	346	346	346	346
coal	South Korea	Asia	Eastern Asia	Taean power station	Unit 10	태안화력	태안화력	1050	operating	2017	2047	ultra-supercritical	bituminous					Korea Western Power [100%]	Korea Electric Power Corp [100.0%]	36.9056	126.235	exact	Banggal	Wonbuk	Taean	South Chungcheong	https://www.gem.wiki/Taean_power_station	L100000103483	G100000109802	KR7015760002	1	9446	9446	7	2057	2097	2137	1050	1050	1050	1050	1050	1050	1050	1050	1050	1050	1050	1050
coal	China	Asia	Eastern Asia	Yangcheng power station	Phase I Unit 1	山西阳城发电厂	大唐阳城电厂	350	operating	2001		subcritical	anthracite					Yangcheng International Power Generating [100%]	China Datang Corp [38.7%]; Jiangsu Guoxin Investment Group Ltd [26.7%]; Shanxi State-Owned Capital Investment and Operation Co Ltd [9.0%]; KEPCO Shanxi International [7.3%]; China Energy Construction Group Co Ltd [6.7%]; Power Construction Corporation of China [6.7%]; KEPCO Woori sprott Global Prive [1.7%]; Power Development [1.5%]; Shanxi Gemeng International Energy Group Co Ltd [1.0%]; other [0…	35.4661	112.574	exact	Beiliu	Yangcheng	Jincheng	Shanxi	https://www.gem.wiki/Yangcheng_power_station	L100000101543	G100000111277	KR7015760002	0.073	5300		23	2041	2081	2121	25.55	25.55	25.55	25.55	25.55	25.55	25.55	25.55	25.55	25.55	25.55	25.55
coal	China	Asia	Eastern Asia	Yangcheng power station	Phase I Unit 2	山西阳城发电厂	大唐阳城电厂	350	operating	2001		subcritical	anthracite					Yangcheng International Power Generating [100%]	China Datang Corp [38.7%]; Jiangsu Guoxin Investment Group Ltd [26.7%]; Shanxi State-Owned Capital Investment and Operation Co Ltd [9.0%]; KEPCO Shanxi International [7.3%]; China Energy Construction Group Co Ltd [6.7%]; Power Construction Corporation of China [6.7%]; KEPCO Woori sprott Global Prive [1.7%]; Power Development [1.5%]; Shanxi Gemeng International Energy Group Co Ltd [1.0%]; other [0…	35.4661	112.574	exact	Beiliu	Yangcheng	Jincheng	Shanxi	https://www.gem.wiki/Yangcheng_power_station	L100000101543	G100000111278	KR7015760002	0.073	5300		23	2041	2081	2121	25.55	25.55	25.55	25.55	25.55	25.55	25.55	25.55	25.55	25.55	25.55	25.55
coal	China	Asia	Eastern Asia	Yangcheng power station	Phase I Unit 3	山西阳城发电厂	大唐阳城电厂	350	operating	2001		subcritical	anthracite					Yangcheng International Power Generating [100%]	China Datang Corp [38.7%]; Jiangsu Guoxin Investment Group Ltd [26.7%]; Shanxi State-Owned Capital Investment and Operation Co Ltd [9.0%]; KEPCO Shanxi International [7.3%]; China Energy Construction Group Co Ltd [6.7%]; Power Construction Corporation of China [6.7%]; KEPCO Woori sprott Global Prive [1.7%]; Power Development [1.5%]; Shanxi Gemeng International Energy Group Co Ltd [1.0%]; other [0…	35.4661	112.574	exact	Beiliu	Yangcheng	Jincheng	Shanxi	https://www.gem.wiki/Yangcheng_power_station	L100000101543	G100000111279	KR7015760002	0.073	5300		23	2041	2081	2121	25.55	25.55	25.55	25.55	25.55	25.55	25.55	25.55	25.55	25.55	25.55	25.55
coal	China	Asia	Eastern Asia	Yangcheng power station	Phase I Unit 4	山西阳城发电厂	大唐阳城电厂	350	operating	2002		subcritical	anthracite					Yangcheng International Power Generating [100%]	China Datang Corp [38.7%]; Jiangsu Guoxin Investment Group Ltd [26.7%]; Shanxi State-Owned Capital Investment and Operation Co Ltd [9.0%]; KEPCO Shanxi International [7.3%]; China Energy Construction Group Co Ltd [6.7%]; Power Construction Corporation of China [6.7%]; KEPCO Woori sprott Global Prive [1.7%]; Power Development [1.5%]; Shanxi Gemeng International Energy Group Co Ltd [1.0%]; other [0…	35.4661	112.574	exact	Beiliu	Yangcheng	Jincheng	Shanxi	https://www.gem.wiki/Yangcheng_power_station	L100000101543	G100000111280	KR7015760002	0.073	5300		22	2042	2082	2122	25.55	25.55	25.55	25.55	25.55	25.55	25.55	25.55	25.55	25.55	25.55	25.55
coal	China	Asia	Eastern Asia	Yangcheng power station	Phase I Unit 5	山西阳城发电厂	大唐阳城电厂	350	operating	2002		subcritical	anthracite					Yangcheng International Power Generating [100%]	China Datang Corp [38.7%]; Jiangsu Guoxin Investment Group Ltd [26.7%]; Shanxi State-Owned Capital Investment and Operation Co Ltd [9.0%]; KEPCO Shanxi International [7.3%]; China Energy Construction Group Co Ltd [6.7%]; Power Construction Corporation of China [6.7%]; KEPCO Woori sprott Global Prive [1.7%]; Power Development [1.5%]; Shanxi Gemeng International Energy Group Co Ltd [1.0%]; other [0…	35.4661	112.574	exact	Beiliu	Yangcheng	Jincheng	Shanxi	https://www.gem.wiki/Yangcheng_power_station	L100000101543	G100000111281	KR7015760002	0.073	5300		22	2042	2082	2122	25.55	25.55	25.55	25.55	25.55	25.55	25.55	25.55	25.55	25.55	25.55	25.55
coal	China	Asia	Eastern Asia	Yangcheng power station	Phase I Unit 6	山西阳城发电厂	大唐阳城电厂	350	operating	2002		subcritical	anthracite					Yangcheng International Power Generating [100%]	China Datang Corp [38.7%]; Jiangsu Guoxin Investment Group Ltd [26.7%]; Shanxi State-Owned Capital Investment and Operation Co Ltd [9.0%]; KEPCO Shanxi International [7.3%]; China Energy Construction Group Co Ltd [6.7%]; Power Construction Corporation of China [6.7%]; KEPCO Woori sprott Global Prive [1.7%]; Power Development [1.5%]; Shanxi Gemeng International Energy Group Co Ltd [1.0%]; other [0…	35.4661	112.574	exact	Beiliu	Yangcheng	Jincheng	Shanxi	https://www.gem.wiki/Yangcheng_power_station	L100000101543	G100000111282	KR7015760002	0.073	5300		22	2042	2082	2122	25.55	25.55	25.55	25.55	25.55	25.55	25.55	25.55	25.55	25.55	25.55	25.55
coal	China	Asia	Eastern Asia	Yangcheng power station	Phase II Unit 7	山西阳城发电厂	大唐阳城电厂	600	operating	2007		subcritical	anthracite					Datang Yangcheng Power Generation [100%]	China Datang Corp [41.0%]; Jiangsu Guoxin Investment Group Ltd [30.0%]; Shanxi State-Owned Capital Investment and Operation Co Ltd [12.3%]; KEPCO Shanxi International [9.9%]; KEPCO Woori sprott Global Prive [2.3%]; Power Development [2.0%]; Shanxi Gemeng International Energy Group Co Ltd [1.4%]; other [1.2%]	35.4661	112.574	exact	Beiliu	Yangcheng	Jincheng	Shanxi	https://www.gem.wiki/Yangcheng_power_station	L100000101543	G100000111283	KR7015760002	0.099	5300		17	2047	2087	2127	59.4	59.4	59.4	59.4	59.4	59.4	59.4	59.4	59.4	59.4	59.4	59.4
coal	China	Asia	Eastern Asia	Yangcheng power station	Phase II Unit 8	山西阳城发电厂	大唐阳城电厂	600	operating	2007		subcritical	anthracite					Datang Yangcheng Power Generation [100%]	China Datang Corp [41.0%]; Jiangsu Guoxin Investment Group Ltd [30.0%]; Shanxi State-Owned Capital Investment and Operation Co Ltd [12.3%]; KEPCO Shanxi International [9.9%]; KEPCO Woori sprott Global Prive [2.3%]; Power Development [2.0%]; Shanxi Gemeng International Energy Group Co Ltd [1.4%]; other [1.2%]	35.4661	112.574	exact	Beiliu	Yangcheng	Jincheng	Shanxi	https://www.gem.wiki/Yangcheng_power_station	L100000101543	G100000111284	KR7015760002	0.099	5300		17	2047	2087	2127	59.4	59.4	59.4	59.4	59.4	59.4	59.4	59.4	59.4	59.4	59.4	59.4
coal	China	Asia	Eastern Asia	Yangcheng power station	Phase III Unit 10	山西阳城发电厂	大唐阳城电厂	1000	announced			ultra-supercritical	anthracite					Yangcheng International Power Generating	China Datang Corp; China Energy Construction Group Co Ltd; Jiangsu Guoxin Investment Group Ltd; KEPCO Shanxi International; KEPCO Woori sprott Global Prive; other; Power Construction Corporation of China; Power Development; Shanxi Gemeng International Energy Group Co Ltd; Shanxi State-Owned Capital Investment and Operation Co Ltd	35.4661	112.574	exact	Beiliu	Yangcheng	Jincheng	Shanxi	https://www.gem.wiki/Yangcheng_power_station	L100000101543	G100001000273	KR7015760002	0.1	5300		-99	40	80	120	0	0	0	0	0	0	0	0	0	100	100	100
coal	China	Asia	Eastern Asia	Yangcheng power station	Phase III Unit 9	山西阳城发电厂	大唐阳城电厂	1000	announced			ultra-supercritical	anthracite					Yangcheng International Power Generating	China Datang Corp; China Energy Construction Group Co Ltd; Jiangsu Guoxin Investment Group Ltd; KEPCO Shanxi International; KEPCO Woori sprott Global Prive; other; Power Construction Corporation of China; Power Development; Shanxi Gemeng International Energy Group Co Ltd; Shanxi State-Owned Capital Investment and Operation Co Ltd	35.4661	112.574	exact	Beiliu	Yangcheng	Jincheng	Shanxi	https://www.gem.wiki/Yangcheng_power_station	L100000101543	G100001000272	KR7015760002	0.1	5300	5300	-99	40	80	120	0	0	0	0	0	0	0	0	0	100	100	100
coal	South Korea	Asia	Eastern Asia	Yeongheung power station	Unit 1	영흥 발전소	Yonghungdo power station, 영흥 발전소	800	operating	2004	2034	supercritical	bituminous					Korea South-East Power [100%]	Korea Electric Power Corp [100.0%]	37.2365	126.438	exact	Oe	Yeongheung	Ongjin	Incheon	https://www.gem.wiki/Yeongheung_power_station	L100000103466	G100000111357	KR7015760002	1	6680		20	2044	2084	2124	800	800	800	800	800	800	800	800	800	800	800	800
coal	South Korea	Asia	Eastern Asia	Yeongheung power station	Unit 2	영흥 발전소	Yonghungdo power station, 영흥 발전소	800	operating	2004	2034	supercritical	bituminous					Korea South-East Power [100%]	Korea Electric Power Corp [100.0%]	37.2365	126.438	exact	Oe	Yeongheung	Ongjin	Incheon	https://www.gem.wiki/Yeongheung_power_station	L100000103466	G100000111358	KR7015760002	1	6680		20	2044	2084	2124	800	800	800	800	800	800	800	800	800	800	800	800
coal	South Korea	Asia	Eastern Asia	Yeongheung power station	Unit 3	영흥 발전소	Yonghungdo power station, 영흥 발전소	870	operating	2009	2038	ultra-supercritical	bituminous					Korea South-East Power [100%]	Korea Electric Power Corp [100.0%]	37.2365	126.438	exact	Oe	Yeongheung	Ongjin	Incheon	https://www.gem.wiki/Yeongheung_power_station	L100000103466	G100000111359	KR7015760002	1	6680		15	2049	2089	2129	870	870	870	870	870	870	870	870	870	870	870	870
coal	South Korea	Asia	Eastern Asia	Yeongheung power station	Unit 4	영흥 발전소	Yonghungdo power station, 영흥 발전소	870	operating	2009	2038	ultra-supercritical	bituminous					Korea South-East Power [100%]	Korea Electric Power Corp [100.0%]	37.2365	126.438	exact	Oe	Yeongheung	Ongjin	Incheon	https://www.gem.wiki/Yeongheung_power_station	L100000103466	G100000111360	KR7015760002	1	6680		15	2049	2089	2129	870	870	870	870	870	870	870	870	870	870	870	870
coal	South Korea	Asia	Eastern Asia	Yeongheung power station	Unit 5	영흥 발전소	Yonghungdo power station, 영흥 발전소	870	operating	2014	2044	supercritical	bituminous					Korea South-East Power [100%]	Korea Electric Power Corp [100.0%]	37.2369	126.436	exact	Oe	Yeongheung	Ongjin	Incheon	https://www.gem.wiki/Yeongheung_power_station	L100000103466	G100000111361	KR7015760002	1	6680		10	2054	2094	2134	870	870	870	870	870	870	870	870	870	870	870	870
coal	South Korea	Asia	Eastern Asia	Yeongheung power station	Unit 6	영흥 발전소	Yonghungdo power station, 영흥 발전소	870	operating	2014	2044	supercritical	bituminous					Korea South-East Power [100%]	Korea Electric Power Corp [100.0%]	37.2369	126.436	exact	Oe	Yeongheung	Ongjin	Incheon	https://www.gem.wiki/Yeongheung_power_station	L100000103466	G100000111362	KR7015760002	1	6680	6680	10	2054	2094	2134	870	870	870	870	870	870	870	870	870	870	870	870
coal	South Korea	Asia	Eastern Asia	Yeosu power station	Unit 2 rebuild	여수 발전소	Yosu power station, 여수 발전소	329	operating	2011	2041	subcritical	bituminous					Korea South-East Power [100%]	Korea Electric Power Corp [100.0%]	34.8393	127.691	exact		Jungheung	Yeosu	North Jeolla	https://www.gem.wiki/Yeosu_power_station	L100000103476	G100000111368	KR7015760002	1	679		13	2051	2091	2131	329	329	329	329	329	329	329	329	329	329	329	329
coal	South Korea	Asia	Eastern Asia	Yeosu power station	Unit 1 rebuild	여수 발전소	Yosu power station, 여수 발전소	350	operating	2016	2046	unknown	bituminous					Korea South-East Power [100%]	Korea Electric Power Corp [100.0%]	34.8393	127.691	exact		Jungheung	Yeosu	North Jeolla	https://www.gem.wiki/Yeosu_power_station	L100000103476	G100000111367	KR7015760002	1	679	679	8	2056	2096	2136	350	350	350	350	350	350	350	350	350	350	350	350
coal	China	Asia	Eastern Asia	Youyu power station	Unit 1	京能京玉发电厂	京能右玉发电厂一期	330	operating	2011		subcritical	unknown					Shanxi Jingyu Power Generation [100%]	Beijing Jingneng Power Co Ltd [51.0%]; Shanxi State-Owned Capital Investment and Operation Co Ltd [20.7%]; KEPCO Shanxi International [16.7%]; KEPCO Woori sprott Global Prive [3.9%]; Power Development [3.4%]; Shanxi Gemeng International Energy Group Co Ltd [2.3%]; other [2.0%]	39.8661	112.512	exact	Baitouli Town Yejia Villege	Youyu	Shuozhou	Shanxi	https://www.gem.wiki/Youyu_power_station	L100000101548	G100000111447	KR7015760002	0.167	660		13	2051	2091	2131	55.11	55.11	55.11	55.11	55.11	55.11	55.11	55.11	55.11	55.11	55.11	55.11
coal	China	Asia	Eastern Asia	Youyu power station	Unit 2	京能京玉发电厂	京能右玉发电厂一期	330	operating	2012		subcritical	unknown					Shanxi Jingyu Power Generation [100%]	Beijing Jingneng Power Co Ltd [51.0%]; Shanxi State-Owned Capital Investment and Operation Co Ltd [20.7%]; KEPCO Shanxi International [16.7%]; KEPCO Woori sprott Global Prive [3.9%]; Power Development [3.4%]; Shanxi Gemeng International Energy Group Co Ltd [2.3%]; other [2.0%]	39.8661	112.512	exact	Baitouli Town Yejia Villege	Youyu	Shuozhou	Shanxi	https://www.gem.wiki/Youyu_power_station	L100000101548	G100000111448	KR7015760002	0.167	660	660	12	2052	2092	2132	55.11	55.11	55.11	55.11	55.11	55.11	55.11	55.11	55.11	55.11	55.11	55.11
coal	China	Asia	Eastern Asia	Yuguang Coal power station	Unit 1	山西国际能源裕光煤电盂县电厂		1000	operating	2021		ultra-supercritical	unknown					Shanxi International Energy Yuguang Coal Power [100%]	Beijing State-owned Capital Management Center [24.0%]; Shanxi State-Owned Capital Investment and Operation Co Ltd [21.6%]; Hebei Construction Investment Energy Investment Co Ltd [20.0%]; KEPCO Shanxi International [17.3%]; Yuxian State Owned Capital Operation Co Ltd [4.5%]; KEPCO Woori sprott Global Prive [4.1%]; Power Development [3.6%]; Shanxi Gemeng International Energy Group Co Ltd [2.4%]; ot…	38.0781	113.483	exact	Niucun Town	Yu	Yangquan	Shanxi	https://www.gem.wiki/Yuguang_Coal_power_station	L100000101551	G100000111465	KR7015760002	0.173	2000		3	2061	2101	2141	0	173	173	173	173	173	173	173	173	173	173	173
coal	China	Asia	Eastern Asia	Yuguang Coal power station	Unit 2	山西国际能源裕光煤电盂县电厂		1000	operating	2021		ultra-supercritical	unknown					Shanxi International Energy Yuguang Coal Power [100%]	Beijing State-owned Capital Management Center [24.0%]; Shanxi State-Owned Capital Investment and Operation Co Ltd [21.6%]; Hebei Construction Investment Energy Investment Co Ltd [20.0%]; KEPCO Shanxi International [17.3%]; Yuxian State Owned Capital Operation Co Ltd [4.5%]; KEPCO Woori sprott Global Prive [4.1%]; Power Development [3.6%]; Shanxi Gemeng International Energy Group Co Ltd [2.4%]; ot…	38.0781	113.483	exact	Niucun Town	Yu	Yangquan	Shanxi	https://www.gem.wiki/Yuguang_Coal_power_station	L100000101551	G100000111466	KR7015760002	0.173	2000	2000	3	2061	2101	2141	0	173	173	173	173	173	173	173	173	173	173	173
oil/gas	Jordan	Asia	Western Asia	Al Qatrana power plant	1	محطة القطرانة الكهربائية	Al Qatrana CCGT Power Plant Jordan	373	operating	2012		CC	NG/D					Qatrana Electric Power Company PSC [100.0%]	Korea Electric Power Corp [80.0%]; XENEL Industries Ltd [20.0%]	31.2226	36.0197	exact	Qatraneh			Karak	https://www.gem.wiki/Al_Qatrana_power_plant	L100000405486	G100000404602	KR7015760002	0.8	373	373	12	2052	2092	2132	298.4	298.4	298.4	298.4	298.4	298.4	298.4	298.4	298.4	298.4	298.4	298.4
oil/gas	South Korea	Asia	Eastern Asia	Andong power station	1	안동C/C		417	operating	2014		CC	LNG					Korea Southern Power Co Ltd [100.0%]	Korea Electric Power Corp [100.0%]	36.5959	128.541	exact	Andong			Gyeongsangbuk-do	https://www.gem.wiki/Andong_power_station	L100000401350	G100000401351	KR7015760002	1	417	417	10	2054	2094	2134	417	417	417	417	417	417	417	417	417	417	417	417
oil/gas	South Korea	Asia	Eastern Asia	Ansan power station	1	안산C/C		834	operating	2014		CC	LNG					S-Power [100.0%]	Korea Electric Power Corp; POSCO Holdings Inc; Samchully Co Ltd	37.2952	126.779	exact	Ansan-si			Gyeonggi-do	https://www.gem.wiki/Ansan_power_station	L100000401351	G100000401352	KR7015760002	0.333333	834	834	10	2054	2094	2134	278	278	278	278	278	278	278	278	278	278	278	278
oil/gas	Jamaica	Americas	Latin America and the Caribbean	Bogue power station	1			120	operating	2003		CC	LNG/D					Jamaica Public Service Co Ltd [100%]	Korea Electric Power Corp [40.0%]; Marubeni Corp [40.0%]; Development Bank of Jamaica [19.9%]; other [0.1%]	18.4521	-77.9183	exact	Montego Bay		St James	Cornwall	https://gem.wiki/Bogue_power_station	L100000406600	G100000406671	KR7015760002	0.4	120	120	21	2043	2083	2123	48	48	48	48	48	48	48	48	48	48	48	48
oil/gas	South Korea	Asia	Eastern Asia	Boryeong power station	CC1	보령C/C	Poryong	450	operating	2002		CC	LNG					Korea Midland Power Co Ltd [100.0%]	Korea Electric Power Corp [100.0%]	36.4009	126.491	exact	Boryeong-si			Chungcheongnam-do	https://www.gem.wiki/Boryeong_power_station	L100000103477	G100000401387	KR7015760002	1	5400		22	2042	2082	2122	450	450	450	450	450	450	450	450	450	450	450	450
oil/gas	South Korea	Asia	Eastern Asia	Boryeong power station	CC2	보령C/C	Poryong	450	operating	2002		CC	LNG					Korea Midland Power Co Ltd [100.0%]	Korea Electric Power Corp [100.0%]	36.4009	126.491	exact	Boryeong-si			Chungcheongnam-do	https://www.gem.wiki/Boryeong_power_station	L100000103477	G100000401388	KR7015760002	1	5400		22	2042	2082	2122	450	450	450	450	450	450	450	450	450	450	450	450
oil/gas	South Korea	Asia	Eastern Asia	Boryeong power station	CC3	보령C/C	Poryong	450	operating	2002		CC	LNG					Korea Midland Power Co Ltd [100.0%]	Korea Electric Power Corp [100.0%]	36.4009	126.491	exact	Boryeong-si			Chungcheongnam-do	https://www.gem.wiki/Boryeong_power_station	L100000103477	G100000401389	KR7015760002	1	5400		22	2042	2082	2122	450	450	450	450	450	450	450	450	450	450	450	450
oil/gas	South Korea	Asia	Eastern Asia	Boryeong power station	CC5	보령C/C	Poryong	500	pre-construction	2025		not found	LNG					Korea Midland Power Co Ltd [100.0%]	Korea Electric Power Corp [100.0%]	36.4009	126.491	exact	Boryeong-si			Chungcheongnam-do	https://www.gem.wiki/Boryeong_power_station	L100000103477	G100000406128	KR7015760002	1	5400		-1	2065	2105	2145	0	0	0	0	0	500	500	500	500	500	500	500
oil/gas	South Korea	Asia	Eastern Asia	Boryeong power station	CC6	보령C/C	Poryong	500	announced	2025		not found	LNG					Korea Midland Power Co Ltd [100.0%]	Korea Electric Power Corp [100.0%]	36.4009	126.491	exact	Boryeong-si			Chungcheongnam-do	https://www.gem.wiki/Boryeong_power_station	L100000103477	G100000406129	KR7015760002	1	5400	5400	-1	2065	2105	2145	0	0	0	0	0	500	500	500	500	500	500	500
oil/gas	South Korea	Asia	Eastern Asia	Bundang power station	1	분당C/C		574	operating	1993		CC	LNG					Korea South-East Power Co Ltd [100.0%]	Korea Electric Power Corp [100.0%]	37.3642	127.148	exact	Seongnam-si			Gyeonggi-do	https://www.gem.wiki/Bundang_power_station	L100000401353	G100000401354	KR7015760002	1	922		31	2033	2073	2113	574	574	574	574	574	574	574	574	574	574	574	574
oil/gas	South Korea	Asia	Eastern Asia	Bundang power station	2	분당C/C		348	operating	1997		CC	LNG					Korea South-East Power Co Ltd [100.0%]	Korea Electric Power Corp [100.0%]	37.3642	127.148	exact	Seongnam-si			Gyeonggi-do	https://www.gem.wiki/Bundang_power_station	L100000401353	G100000401355	KR7015760002	1	922	922	27	2037	2077	2117	348	348	348	348	348	348	348	348	348	348	348	348
oil/gas	South Korea	Asia	Eastern Asia	Busan power station	1	부산C/C	Pusan	450	operating	2001		CC	LNG					Korea Southern Power Co Ltd [100.0%]	Korea Electric Power Corp [100.0%]	35.0851	129	exact	Busan-si			Busan	https://www.gem.wiki/Busan_power_station	L100000401355	G100000401356	KR7015760002	1	1800		23	2041	2081	2121	450	450	450	450	450	450	450	450	450	450	450	450
oil/gas	South Korea	Asia	Eastern Asia	Busan power station	2	부산C/C	Pusan	450	operating	2002		CC	LNG					Korea Southern Power Co Ltd [100.0%]	Korea Electric Power Corp [100.0%]	35.0851	129	exact	Busan-si			Busan	https://www.gem.wiki/Busan_power_station	L100000401355	G100000401357	KR7015760002	1	1800		22	2042	2082	2122	450	450	450	450	450	450	450	450	450	450	450	450
oil/gas	South Korea	Asia	Eastern Asia	Busan power station	3	부산C/C	Pusan	450	operating	2003		CC	LNG					Korea Southern Power Co Ltd [100.0%]	Korea Electric Power Corp [100.0%]	35.0851	129	exact	Busan-si			Busan	https://www.gem.wiki/Busan_power_station	L100000401355	G100000401358	KR7015760002	1	1800		21	2043	2083	2123	450	450	450	450	450	450	450	450	450	450	450	450
oil/gas	South Korea	Asia	Eastern Asia	Busan power station	4	부산C/C	Pusan	450	operating	2004		CC	LNG					Korea Southern Power Co Ltd [100.0%]	Korea Electric Power Corp [100.0%]	35.0851	129	exact	Busan-si			Busan	https://www.gem.wiki/Busan_power_station	L100000401355	G100000401359	KR7015760002	1	1800	1800	20	2044	2084	2124	450	450	450	450	450	450	450	450	450	450	450	450
oil/gas	South Korea	Asia	Eastern Asia	Chuncheon CHP power station	1			470	operating	2017		CC	LNG					Hanjin Heavy Industries [40.0%]; Korea East-West Power Co Ltd [29.9%]; POSCO Holdings Inc [29.9%]	Korea Electric Power Corp [29.9%]; POSCO Holdings Inc [29.9%]	37.8759	127.71	approximate	Chuncheon			Gangwon-do	https://www.gem.wiki/Chuncheon_CHP_power_station	L100000406311	G100000406131	KR7015760002	0.299	470	470	7	2057	2097	2137	140.53	140.53	140.53	140.53	140.53	140.53	140.53	140.53	140.53	140.53	140.53	140.53
oil/gas	South Korea	Asia	Eastern Asia	Daegu CHP power station	1	대구그린파워	Daegu Innovation City CHPP/Daegugreenpower	415	operating	2014		CC	LNG					Daegu Green Power Co Ltd [100.0%]	NongHyup Bank [46.5%]; Korea Electric Power Corp [29.0%]; Lotte E&C [19.9%]	35.8747	128.612	approximate	Daegu				https://www.gem.wiki/Daegu_CHP_power_station	L100000406312	G100000406132	KR7015760002	0.29	415	415	10	2054	2094	2134	120.35	120.35	120.35	120.35	120.35	120.35	120.35	120.35	120.35	120.35	120.35	120.35
oil/gas	South Korea	Asia	Eastern Asia	Dongducheon power station	1	동두천C/C		858	operating	2015		CC	LNG					Dongducheon Dream Power Co Ltd [100.0%]	Korea Electric Power Corp [33.6%]; Samsung C&T Corp [31.5%]; HDC Hyundai Development Co [31.0%]	37.903	127.09	exact	Dongducheon-si			Gyeonggi-do	https://www.gem.wiki/Dongducheon_power_station	L100000401365	G100000401366	KR7015760002	0.336	1716		9	2055	2095	2135	288.288	288.288	288.288	288.288	288.288	288.288	288.288	288.288	288.288	288.288	288.288	288.288
oil/gas	South Korea	Asia	Eastern Asia	Dongducheon power station	2	동두천C/C		858	operating	2015		CC	LNG					Dongducheon Dream Power Co Ltd [100.0%]	Korea Electric Power Corp [33.6%]; Samsung C&T Corp [31.5%]; HDC Hyundai Development Co [31.0%]	37.903	127.09	exact	Dongducheon-si			Gyeonggi-do	https://www.gem.wiki/Dongducheon_power_station	L100000401365	G100000401367	KR7015760002	0.336	1716	1716	9	2055	2095	2135	288.288	288.288	288.288	288.288	288.288	288.288	288.288	288.288	288.288	288.288	288.288	288.288
oil/gas	Nigeria	Africa	Sub-Saharan Africa	Egbin power station	1			220	operating	1985		ST	NG					Egbin Power PLC [100.0%]	KEPCO Energy Resources Ltd [70.0%]; Bureau of Public Enterprises (Nigeria) [24.0%]; Ministry of Finance Incorporated (Nigeria) [6.0%]	6.56371	3.61508	exact	Ijede			Lagos	https://www.gem.wiki/Egbin_power_station	L100000406784	G100000407164	KR7015760002	0.7	3120		39	2025	2065	2105	154	154	154	154	154	154	154	154	154	154	154	154
oil/gas	Nigeria	Africa	Sub-Saharan Africa	Egbin power station	2			220	operating	1985		ST	NG					Egbin Power PLC [100.0%]	KEPCO Energy Resources Ltd [70.0%]; Bureau of Public Enterprises (Nigeria) [24.0%]; Ministry of Finance Incorporated (Nigeria) [6.0%]	6.56371	3.61508	exact	Ijede			Lagos	https://www.gem.wiki/Egbin_power_station	L100000406784	G100000407165	KR7015760002	0.7	3120		39	2025	2065	2105	154	154	154	154	154	154	154	154	154	154	154	154
oil/gas	Nigeria	Africa	Sub-Saharan Africa	Egbin power station	3			220	operating	1985		ST	NG					Egbin Power PLC [100.0%]	KEPCO Energy Resources Ltd [70.0%]; Bureau of Public Enterprises (Nigeria) [24.0%]; Ministry of Finance Incorporated (Nigeria) [6.0%]	6.56371	3.61508	exact	Ijede			Lagos	https://www.gem.wiki/Egbin_power_station	L100000406784	G100000407166	KR7015760002	0.7	3120		39	2025	2065	2105	154	154	154	154	154	154	154	154	154	154	154	154
oil/gas	Nigeria	Africa	Sub-Saharan Africa	Egbin power station	4			220	operating	1985		ST	NG					Egbin Power PLC [100.0%]	KEPCO Energy Resources Ltd [70.0%]; Bureau of Public Enterprises (Nigeria) [24.0%]; Ministry of Finance Incorporated (Nigeria) [6.0%]	6.56371	3.61508	exact	Ijede			Lagos	https://www.gem.wiki/Egbin_power_station	L100000406784	G100000407167	KR7015760002	0.7	3120		39	2025	2065	2105	154	154	154	154	154	154	154	154	154	154	154	154
oil/gas	Nigeria	Africa	Sub-Saharan Africa	Egbin power station	5			220	operating	1985		ST	NG					Egbin Power PLC [100.0%]	KEPCO Energy Resources Ltd [70.0%]; Bureau of Public Enterprises (Nigeria) [24.0%]; Ministry of Finance Incorporated (Nigeria) [6.0%]	6.56371	3.61508	exact	Ijede			Lagos	https://www.gem.wiki/Egbin_power_station	L100000406784	G100000407168	KR7015760002	0.7	3120		39	2025	2065	2105	154	154	154	154	154	154	154	154	154	154	154	154
oil/gas	Nigeria	Africa	Sub-Saharan Africa	Egbin power station	6			220	operating	1985		ST	NG					Egbin Power PLC [100.0%]	KEPCO Energy Resources Ltd [70.0%]; Bureau of Public Enterprises (Nigeria) [24.0%]; Ministry of Finance Incorporated (Nigeria) [6.0%]	6.56371	3.61508	exact	Ijede			Lagos	https://www.gem.wiki/Egbin_power_station	L100000406784	G100000407169	KR7015760002	0.7	3120		39	2025	2065	2105	154	154	154	154	154	154	154	154	154	154	154	154
oil/gas	Nigeria	Africa	Sub-Saharan Africa	Egbin power station	B			1800	announced	2025		GT	LNG					Egbin Power PLC [100.0%]	KEPCO Energy Resources Ltd [70.0%]; Bureau of Public Enterprises (Nigeria) [24.0%]; Ministry of Finance Incorporated (Nigeria) [6.0%]	6.56371	3.61508	exact	Ijede			Lagos	https://www.gem.wiki/Egbin_power_station	L100000406784	G100000407170	KR7015760002	0.7	3120	3120	-1	2065	2105	2145	0	0	0	0	0	1260	1260	1260	1260	1260	1260	1260
oil/gas	South Korea	Asia	Eastern Asia	Eumseong power station	CC1			561	construction	2026		CC	LNG/LPG					Korea East-West Power Co Ltd [100.0%]	Korea Electric Power Corp [100.0%]	36.9418	127.655	approximate	Eumseong-eup		Eumseong-gun	Chungcheongbuk-do	https://www.gem.wiki/Eumseong_power_station	L100000401363	G100000401364	KR7015760002	1	1122		-2	2066	2106	2146	0	0	0	0	0	0	561	561	561	561	561	561
oil/gas	South Korea	Asia	Eastern Asia	Eumseong power station	CC2			561	construction	2026		CC	LNG					Korea East-West Power Co Ltd [100.0%]	Korea Electric Power Corp [100.0%]	36.9418	127.655	approximate	Eumseong-eup		Eumseong-gun	Chungcheongbuk-do	https://www.gem.wiki/Eumseong_power_station	L100000401363	G100000412629	KR7015760002	1	1122	1122	-2	2066	2106	2146	0	0	0	0	0	0	561	561	561	561	561	561
oil/gas	South Korea	Asia	Eastern Asia	Gimpo CHP power station	1			270	operating	2023		GT	LNG					Korea Western Power Co Ltd [100.0%]	Korea Electric Power Corp [100.0%]	37.6498	126.638	approximate	Gimpo			Gyeonggi-do	https://www.gem.wiki/Gimpo_CHP_power_station	L100000406314	G100000406135	KR7015760002	1	495		1	2063	2103	2143	0	0	0	270	270	270	270	270	270	270	270	270
oil/gas	South Korea	Asia	Eastern Asia	Gimpo CHP power station	2			225	construction	2025		ST	LNG					Korea Western Power Co Ltd [100.0%]	Korea Electric Power Corp [100.0%]	37.6498	126.638	approximate	Gimpo			Gyeonggi-do	https://www.gem.wiki/Gimpo_CHP_power_station	L100000406314	G100000412628	KR7015760002	1	495	495	-1	2065	2105	2145	0	0	0	0	0	225	225	225	225	225	225	225
oil/gas	South Korea	Asia	Eastern Asia	Gumi Combined Cycle power plant	1			501	construction	2025		CC	LNG					Korea Western Power Co Ltd [100.0%]	Korea Electric Power Corp [100.0%]	36.2073	128.356	approximate	Haepyeong-myeon - Gumi-si			Gyeongsangbuk-do	https://www.gem.wiki/Gumi_Combined_Cycle_power_plant	L100000407738	G100000410206	KR7015760002	1	501	501	-1	2065	2105	2145	0	0	0	0	0	501	501	501	501	501	501	501
oil/gas	South Korea	Asia	Eastern Asia	Gunsan CC power station	1	군산C/C		718	operating	2010		CC	LNG					Korea Western Power Co Ltd [100.0%]	Korea Electric Power Corp [100.0%]	35.9836	126.731	exact	Gunsan-si			Jeollabuk-do	https://www.gem.wiki/Gunsan_CC_power_station	L100000401367	G100000401368	KR7015760002	1	718	718	14	2050	2090	2130	718	718	718	718	718	718	718	718	718	718	718	718
oil/gas	South Korea	Asia	Eastern Asia	Hadong power station	1			500	announced	2026		not found	LNG					Korea Southern Power Co Ltd [100.0%]	Korea Electric Power Corp [100.0%]	34.9524	127.82	exact	Gyeongjesaneop	Geumseong	Hadong	Gyeongsangnam-do	https://www.gem.wiki/Hadong_power_station	L100000103485	G100000406138	KR7015760002	1	7000		-2	2066	2106	2146	0	0	0	0	0	0	500	500	500	500	500	500
oil/gas	South Korea	Asia	Eastern Asia	Hadong power station	2			500	announced	2027		not found	LNG					Korea Southern Power Co Ltd [100.0%]	Korea Electric Power Corp [100.0%]	34.9524	127.82	exact	Gyeongjesaneop	Geumseong	Hadong	Gyeongsangnam-do	https://www.gem.wiki/Hadong_power_station	L100000103485	G100000406139	KR7015760002	1	7000		-3	2067	2107	2147	0	0	0	0	0	0	0	500	500	500	500	500
oil/gas	South Korea	Asia	Eastern Asia	Hadong power station	3			500	announced	2028		not found	LNG					Korea Southern Power Co Ltd [100.0%]	Korea Electric Power Corp [100.0%]	34.9524	127.82	exact	Gyeongjesaneop	Geumseong	Hadong	Gyeongsangnam-do	https://www.gem.wiki/Hadong_power_station	L100000103485	G100000406140	KR7015760002	1	7000		-4	2068	2108	2148	0	0	0	0	0	0	0	0	500	500	500	500
oil/gas	South Korea	Asia	Eastern Asia	Hadong power station	4			500	announced	2028		not found	LNG					Korea Southern Power Co Ltd [100.0%]	Korea Electric Power Corp [100.0%]	34.9524	127.82	exact	Gyeongjesaneop	Geumseong	Hadong	Gyeongsangnam-do	https://www.gem.wiki/Hadong_power_station	L100000103485	G100000406141	KR7015760002	1	7000		-4	2068	2108	2148	0	0	0	0	0	0	0	0	500	500	500	500
oil/gas	South Korea	Asia	Eastern Asia	Hadong power station	5			500	announced	2031		not found	LNG					Korea Southern Power Co Ltd [100.0%]	Korea Electric Power Corp [100.0%]	34.9524	127.82	exact	Gyeongjesaneop	Geumseong	Hadong	Gyeongsangnam-do	https://www.gem.wiki/Hadong_power_station	L100000103485	G100000406142	KR7015760002	1	7000		-7	2071	2111	2151	0	0	0	0	0	0	0	0	0	0	0	500
oil/gas	South Korea	Asia	Eastern Asia	Hadong power station	6			500	announced	2031		not found	LNG					Korea Southern Power Co Ltd [100.0%]	Korea Electric Power Corp [100.0%]	34.9524	127.82	exact	Gyeongjesaneop	Geumseong	Hadong	Gyeongsangnam-do	https://www.gem.wiki/Hadong_power_station	L100000103485	G100000406143	KR7015760002	1	7000	7000	-7	2071	2111	2151	0	0	0	0	0	0	0	0	0	0	0	500
oil/gas	Vietnam	Asia	South-eastern Asia	Hai Lang power station	1-1			1500	announced	2030		CC	LNG					Korea Gas Corp; Korea Southern Power Co Ltd; T&T Group JSC	Korea Electric Power Corp; Korea Gas Corp; T&T Group JSC	16.9944	107.115	approximate	not found			Quảng Trị	https://www.gem.wiki/Hai_Lang_power_station	L100000405976	G100000405995	KR7015760002	0.333333	1500	1500	-6	2070	2110	2150	0	0	0	0	0	0	0	0	0	0	500	500
oil/gas	South Korea	Asia	Eastern Asia	Hallim Complex power station	1	한림복합	Hanlim	105	operating	1997		CC	LNG					Korea Southern Power Co Ltd [100.0%]	Korea Electric Power Corp [100.0%]	33.4028	126.272	exact	Hallim		Jeju-si	Jeju-do	https://www.gem.wiki/Hallim_Complex_power_station	L100000408494	G100000412627	KR7015760002	1	105	105	27	2037	2077	2117	105	105	105	105	105	105	105	105	105	105	105	105
oil/gas	Jamaica	Americas	Latin America and the Caribbean	Hunts Bay power station	1			143	announced	2027		CC	LNG					Jamaica Public Service Co Ltd [100%]	Korea Electric Power Corp [40.0%]; Marubeni Corp [40.0%]; Development Bank of Jamaica [19.9%]; other [0.1%]	17.9718	-76.81	exact	Kingston			Surrey	https://gem.wiki/Hunts_Bay_power_station	L100000407910	G100000411248	KR7015760002	0.4	143	143	-3	2067	2107	2147	0	0	0	0	0	0	0	57.2	57.2	57.2	57.2	57.2
oil/gas	South Korea	Asia	Eastern Asia	Ilsan power station	1			630	operating	1993		CC	LNG					Korea East-West Power Co Ltd [100.0%]	Korea Electric Power Corp [100.0%]	37.6479	126.797	exact	Goyang			Gyeonggi-do	https://www.gem.wiki/Ilsan_power_station	L100000406319	G100000406146	KR7015760002	1	930		31	2033	2073	2113	630	630	630	630	630	630	630	630	630	630	630	630
oil/gas	South Korea	Asia	Eastern Asia	Ilsan power station	2			300	operating	1996		CC	LNG					Korea East-West Power Co Ltd [100.0%]	Korea Electric Power Corp [100.0%]	37.6479	126.797	exact	Goyang			Gyeonggi-do	https://www.gem.wiki/Ilsan_power_station	L100000406319	G100000406147	KR7015760002	1	930	930	28	2036	2076	2116	300	300	300	300	300	300	300	300	300	300	300	300
oil/gas	United States	Americas	Northern America	Indeck Niles energy center	CC_set			1174	operating	2022		CC	NG					KOSPO USA [50.0%]; DL-Energy [30.0%]; Indeck Energy Services Inc [20.0%]	Korea Electric Power Corp [50.0%]; DL Holdings [21.0%]; Daelim co.,Ltd [9.0%]	41.8621	-86.2214	exact	Niles	Cass		Michigan	https://www.gem.wiki/Indeck_Niles_energy_center	L100000402411	G100000401930	KR7015760002	0.5	1174	1174	2	2062	2102	2142	0	0	587	587	587	587	587	587	587	587	587	587
oil/gas	Jordan	Asia	Western Asia	IPP3 ICE power plant	1			573.8	operating	2015		IC	NG/FO/D					Amman Asia Electric Power Company PSC [100.0%]	Korea Electric Power Corp [60.0%]; Mitsubishi Corp; Wärtsilä Oyj	31.9552	35.945	approximate	Amman			Amman	https://www.gem.wiki/IPP3_ICE_power_plant	L100000408212	G100000411581	KR7015760002	0.5	573.8	573.8	9	2055	2095	2135	286.9	286.9	286.9	286.9	286.9	286.9	286.9	286.9	286.9	286.9	286.9	286.9
oil/gas	South Korea	Asia	Eastern Asia	Jeju thermal power station	CC1		Bukjeju	114	operating	2018		CC	LNG					Korea Midland Power Co Ltd [100.0%]	Korea Electric Power Corp [100.0%]	33.5345	126.593	exact	Jeju-si			Jeju-do	https://www.gem.wiki/Jeju_thermal_power_station	L100000401414	G100000401415	KR7015760002	1	228		6	2058	2098	2138	114	114	114	114	114	114	114	114	114	114	114	114
oil/gas	South Korea	Asia	Eastern Asia	Jeju thermal power station	CC2		Bukjeju	114	operating	2018		CC	LNG					Korea Midland Power Co Ltd [100.0%]	Korea Electric Power Corp [100.0%]	33.5345	126.593	exact	Jeju-si			Jeju-do	https://www.gem.wiki/Jeju_thermal_power_station	L100000401414	G100000401416	KR7015760002	1	228	228	6	2058	2098	2138	114	114	114	114	114	114	114	114	114	114	114	114
oil/gas	South Korea	Asia	Eastern Asia	KOMIPO Incheon power station	1	인천C/C		504	operating	2005		CC	LNG					Korea Midland Power Co Ltd [100.0%]	Korea Electric Power Corp [100.0%]	37.5109	126.609	exact	Incheon-si			Incheon	https://www.gem.wiki/KOMIPO_Incheon_power_station	L100000401370	G100000401371	KR7015760002	1	1463		19	2045	2085	2125	504	504	504	504	504	504	504	504	504	504	504	504
oil/gas	South Korea	Asia	Eastern Asia	KOMIPO Incheon power station	2	인천C/C		509	operating	2009		CC	LNG					Korea Midland Power Co Ltd [100.0%]	Korea Electric Power Corp [100.0%]	37.5109	126.609	exact	Incheon-si			Incheon	https://www.gem.wiki/KOMIPO_Incheon_power_station	L100000401370	G100000401372	KR7015760002	1	1463		15	2049	2089	2129	509	509	509	509	509	509	509	509	509	509	509	509
oil/gas	South Korea	Asia	Eastern Asia	KOMIPO Incheon power station	3	인천C/C		450	operating	2012		CC	LNG					Korea Midland Power Co Ltd [100.0%]	Korea Electric Power Corp [100.0%]	37.5109	126.609	exact	Incheon-si			Incheon	https://www.gem.wiki/KOMIPO_Incheon_power_station	L100000401370	G100000401373	KR7015760002	1	1463	1463	12	2052	2092	2132	450	450	450	450	450	450	450	450	450	450	450	450
oil/gas	Angola	Africa	Sub-Saharan Africa	Lobito power station	1-1		Benguela	375	pre-construction	2027		CC	NG					Beltec Engenharia e Serviços [25.0%]; Busan Korea Biotechnology (BKB) [25.0%]; Hyundai Engineering Co Ltd [25.0%]; Korea Southern Power Co Ltd [25.0%]	Hyundai Motor Group [25.0%]; Korea Electric Power Corp [25.0%]	-12.3665	13.5328	approximate	Lobito			Benguela	https://www.gem.wiki/Lobito_power_station	L100000406735	G100000407060	KR7015760002	0.25	750		-3	2067	2107	2147	0	0	0	0	0	0	0	93.75	93.75	93.75	93.75	93.75
oil/gas	Angola	Africa	Sub-Saharan Africa	Lobito power station	1-2		Benguela	375	pre-construction	2029		CC	NG					Beltec Engenharia e Serviços [25.0%]; Busan Korea Biotechnology (BKB) [25.0%]; Hyundai Engineering Co Ltd [25.0%]; Korea Southern Power Co Ltd [25.0%]	Hyundai Motor Group [25.0%]; Korea Electric Power Corp [25.0%]	-12.3665	13.5328	approximate	Lobito			Benguela	https://www.gem.wiki/Lobito_power_station	L100000406735	G100000407061	KR7015760002	0.25	750	750	-5	2069	2109	2149	0	0	0	0	0	0	0	0	0	93.75	93.75	93.75
oil/gas	India	Asia	Southern Asia	Mangaon Combined Cycle power plant	1			388	operating	2016		CC	NG					Pioneer Gas Power Ltd [100.0%]	Korea Electric Power Corp [38.5%]	18.3879	73.3529	exact	Bhagad			Maharashtra	https://www.gem.wiki/Mangaon_Combined_Cycle_power_plant	L100000401488	G100000401458	KR7015760002	0.385	388	388	8	2056	2096	2136	149.38	149.38	149.38	149.38	149.38	149.38	149.38	149.38	149.38	149.38	149.38	149.38
oil/gas	South Korea	Asia	Eastern Asia	Naepo Green Energy power station	1			500	operating	2023		CC	NG					Naepo Green Energy Co Ltd [100.0%]	other [70.8%]; Korea Electric Power Corp [29.2%]	36.6549	126.677	approximate	Naepo			Chungcheongnam-do	https://www.gem.wiki/Naepo_Green_Energy_power_station	L100000406320	G100000406148	KR7015760002	0.292	500	500	1	2063	2103	2143	0	0	0	146	146	146	146	146	146	146	146	146
oil/gas	South Korea	Asia	Eastern Asia	Namjeju Power Complex	1	남제주복합	KOSPO Namjeju Power Plant	150	operating	2020		CC	LNG					Korea Southern Power Co Ltd [100.0%]	Korea Electric Power Corp [100.0%]	33.2368	126.34	exact	Seogwipo			Jeju-do	https://www.gem.wiki/Namjeju_Power_Complex	L100000406380	G100000406294	KR7015760002	1	296.24		4	2060	2100	2140	150	150	150	150	150	150	150	150	150	150	150	150
oil/gas	South Korea	Asia	Eastern Asia	Namjeju Power Complex	2	남제주복합	KOSPO Namjeju Power Plant	146.24	operating	2020		CC	LNG					Korea Southern Power Co Ltd [100.0%]	Korea Electric Power Corp [100.0%]	33.2368	126.34	exact	Seogwipo			Jeju-do	https://www.gem.wiki/Namjeju_Power_Complex	L100000406380	G100000412623	KR7015760002	1	296.24	296.24	4	2060	2100	2140	146.24	146.24	146.24	146.24	146.24	146.24	146.24	146.24	146.24	146.24	146.24	146.24
oil/gas	Mexico	Americas	Latin America and the Caribbean	Norte II power station	1	Central CC Norte II	KST/El Encino	433	operating	2014		CC	NG					KST Electric Power Company SAPI de CV [100%]	Korea Electric Power Corp [56.0%]; Samsung C&T Corp [34.0%]; Techint SA de CV [10.0%]	28.4422	-105.918	exact	Chihuahua			Chihuahua	https://gem.wiki/Norte_II_power_station	L100000406237	G100000406382	KR7015760002	0.56	433	433	10	2054	2094	2134	242.48	242.48	242.48	242.48	242.48	242.48	242.48	242.48	242.48	242.48	242.48	242.48
oil/gas	Malaysia	Asia	South-eastern Asia	Palua Indah power station	1			600	construction	2024		CC	NG					Worldwide Holdings Bhd [75.0%]; Korea Electric Power Corp [25.0%]	Perbadanan Kemajuan Negeri Selangor [75.0%]; Korea Electric Power Corp [25.0%]	2.94022	101.262	approximate	Pulau Indah			Selangor	https://www.gem.wiki/Palua_Indah_power_station	L100000405308	G100000404367	KR7015760002	0.25	1200		0	2064	2104	2144	0	0	0	0	150	150	150	150	150	150	150	150
oil/gas	Malaysia	Asia	South-eastern Asia	Palua Indah power station	2			600	construction	2024		CC	NG					Worldwide Holdings Bhd [75.0%]; Korea Electric Power Corp [25.0%]	Perbadanan Kemajuan Negeri Selangor [75.0%]; Korea Electric Power Corp [25.0%]	2.94022	101.262	approximate	Pulau Indah			Selangor	https://www.gem.wiki/Palua_Indah_power_station	L100000405308	G100000404368	KR7015760002	0.25	1200	1200	0	2064	2104	2144	0	0	0	0	150	150	150	150	150	150	150	150
oil/gas	South Korea	Asia	Eastern Asia	Pyeongtaek power station	1			350	operating	1980		ST	LNG					Korea Western Power Co Ltd [100.0%]	Korea Electric Power Corp [100.0%]	37.0058	126.798	exact	Pyeongtaek			Gyeonggi-do	https://www.gem.wiki/Pyeongtaek_power_station	L100000401389	G100000406153	KR7015760002	1	2268		44	2020	2060	2100	350	350	350	350	350	350	350	350	350	350	350	350
oil/gas	South Korea	Asia	Eastern Asia	Pyeongtaek power station	2			350	operating	1980		ST	LNG					Korea Western Power Co Ltd [100.0%]	Korea Electric Power Corp [100.0%]	37.0058	126.798	exact	Pyeongtaek			Gyeonggi-do	https://www.gem.wiki/Pyeongtaek_power_station	L100000401389	G100000412620	KR7015760002	1	2268		44	2020	2060	2100	350	350	350	350	350	350	350	350	350	350	350	350
oil/gas	South Korea	Asia	Eastern Asia	Pyeongtaek power station	3			350	operating	1983		ST	LNG					Korea Western Power Co Ltd [100.0%]	Korea Electric Power Corp [100.0%]	37.0058	126.798	exact	Pyeongtaek			Gyeonggi-do	https://www.gem.wiki/Pyeongtaek_power_station	L100000401389	G100000412619	KR7015760002	1	2268		41	2023	2063	2103	350	350	350	350	350	350	350	350	350	350	350	350
oil/gas	South Korea	Asia	Eastern Asia	Pyeongtaek power station	4			350	operating	1983		ST	LNG					Korea Western Power Co Ltd [100.0%]	Korea Electric Power Corp [100.0%]	37.0058	126.798	exact	Pyeongtaek			Gyeonggi-do	https://www.gem.wiki/Pyeongtaek_power_station	L100000401389	G100000412618	KR7015760002	1	2268		41	2023	2063	2103	350	350	350	350	350	350	350	350	350	350	350	350
oil/gas	South Korea	Asia	Eastern Asia	Pyeongtaek power station	CC2			868	operating	2014		CC	LNG					Korea Western Power Co Ltd [100.0%]	Korea Electric Power Corp [100.0%]	37.0058	126.798	exact	Pyeongtaek			Gyeonggi-do	https://www.gem.wiki/Pyeongtaek_power_station	L100000401389	G100000401390	KR7015760002	1	2268	2268	10	2054	2094	2134	868	868	868	868	868	868	868	868	868	868	868	868
oil/gas	South Korea	Asia	Eastern Asia	Samchonpo power station	CC3		Samcheonpo power station	560	announced	2026		not found	LNG					Korea South-East Power Co Ltd [100.0%]	Korea Electric Power Corp [100.0%]	34.9062	128.103	exact	Deokho	Hai	Goseong	Gyeongsangnam-do	https://www.gem.wiki/Samchonpo_power_station	L100000103487	G100000406154	KR7015760002	1	5360		-2	2066	2106	2146	0	0	0	0	0	0	560	560	560	560	560	560
oil/gas	South Korea	Asia	Eastern Asia	Samchonpo power station	CC4		Samcheonpo power station	560	announced	2026		not found	LNG					Korea South-East Power Co Ltd [100.0%]	Korea Electric Power Corp [100.0%]	34.9062	128.103	exact	Deokho	Hai	Goseong	Gyeongsangnam-do	https://www.gem.wiki/Samchonpo_power_station	L100000103487	G100000406155	KR7015760002	1	5360		-2	2066	2106	2146	0	0	0	0	0	0	560	560	560	560	560	560
oil/gas	South Korea	Asia	Eastern Asia	Samchonpo power station	CC5		Samcheonpo power station	500	announced	2027		not found	LNG					Korea South-East Power Co Ltd [100.0%]	Korea Electric Power Corp [100.0%]	34.9062	128.103	exact	Deokho	Hai	Goseong	Gyeongsangnam-do	https://www.gem.wiki/Samchonpo_power_station	L100000103487	G100000406156	KR7015760002	1	5360		-3	2067	2107	2147	0	0	0	0	0	0	0	500	500	500	500	500
oil/gas	South Korea	Asia	Eastern Asia	Samchonpo power station	CC6		Samcheonpo power station	500	announced	2028		not found	LNG					Korea South-East Power Co Ltd [100.0%]	Korea Electric Power Corp [100.0%]	34.9062	128.103	exact	Deokho	Hai	Goseong	Gyeongsangnam-do	https://www.gem.wiki/Samchonpo_power_station	L100000103487	G100000406157	KR7015760002	1	5360	5360	-4	2068	2108	2148	0	0	0	0	0	0	0	0	500	500	500	500
oil/gas	South Korea	Asia	Eastern Asia	Sejong (KOMIPO) power station	1			530	operating	2013		CC	LNG					Korea Midland Power Co Ltd [100.0%]	Korea Electric Power Corp [100.0%]	36.4686	127.247	exact	Sejong	Songwan		Chungcheongnam-do	https://www.gem.wiki/Sejong_(KOMIPO)_power_station	L100000406325	G100000406158	KR7015760002	1	530	530	11	2053	2093	2133	530	530	530	530	530	530	530	530	530	530	530	530
oil/gas	South Korea	Asia	Eastern Asia	Seoincheon KOWEPO power station	1	서인천C/C		225	operating	1992		CC	LNG					Korea Western Power Co Ltd [100.0%]	Korea Electric Power Corp [100.0%]	37.5363	126.603	exact	Seo-gu			Incheon	https://www.gem.wiki/Seoincheon_KOWEPO_power_station	L100000401390	G100000401391	KR7015760002	1	1800		32	2032	2072	2112	225	225	225	225	225	225	225	225	225	225	225	225
oil/gas	South Korea	Asia	Eastern Asia	Seoincheon KOWEPO power station	2	서인천C/C		225	operating	1992		CC	LNG					Korea Western Power Co Ltd [100.0%]	Korea Electric Power Corp [100.0%]	37.5363	126.603	exact	Seo-gu			Incheon	https://www.gem.wiki/Seoincheon_KOWEPO_power_station	L100000401390	G100000401392	KR7015760002	1	1800		32	2032	2072	2112	225	225	225	225	225	225	225	225	225	225	225	225
oil/gas	South Korea	Asia	Eastern Asia	Seoincheon KOWEPO power station	3	서인천C/C		225	operating	1992		CC	LNG					Korea Western Power Co Ltd [100.0%]	Korea Electric Power Corp [100.0%]	37.5363	126.603	exact	Seo-gu			Incheon	https://www.gem.wiki/Seoincheon_KOWEPO_power_station	L100000401390	G100000401393	KR7015760002	1	1800		32	2032	2072	2112	225	225	225	225	225	225	225	225	225	225	225	225
oil/gas	South Korea	Asia	Eastern Asia	Seoincheon KOWEPO power station	4	서인천C/C		225	operating	1992		CC	LNG					Korea Western Power Co Ltd [100.0%]	Korea Electric Power Corp [100.0%]	37.5363	126.603	exact	Seo-gu			Incheon	https://www.gem.wiki/Seoincheon_KOWEPO_power_station	L100000401390	G100000401394	KR7015760002	1	1800		32	2032	2072	2112	225	225	225	225	225	225	225	225	225	225	225	225
oil/gas	South Korea	Asia	Eastern Asia	Seoincheon KOWEPO power station	5	서인천C/C		225	operating	1992		CC	LNG					Korea Western Power Co Ltd [100.0%]	Korea Electric Power Corp [100.0%]	37.5363	126.603	exact	Seo-gu			Incheon	https://www.gem.wiki/Seoincheon_KOWEPO_power_station	L100000401390	G100000401395	KR7015760002	1	1800		32	2032	2072	2112	225	225	225	225	225	225	225	225	225	225	225	225
oil/gas	South Korea	Asia	Eastern Asia	Seoincheon KOWEPO power station	6	서인천C/C		225	operating	1992		CC	LNG					Korea Western Power Co Ltd [100.0%]	Korea Electric Power Corp [100.0%]	37.5363	126.603	exact	Seo-gu			Incheon	https://www.gem.wiki/Seoincheon_KOWEPO_power_station	L100000401390	G100000401396	KR7015760002	1	1800		32	2032	2072	2112	225	225	225	225	225	225	225	225	225	225	225	225
oil/gas	South Korea	Asia	Eastern Asia	Seoincheon KOWEPO power station	7	서인천C/C		225	operating	1992		CC	LNG					Korea Western Power Co Ltd [100.0%]	Korea Electric Power Corp [100.0%]	37.5363	126.603	exact	Seo-gu			Incheon	https://www.gem.wiki/Seoincheon_KOWEPO_power_station	L100000401390	G100000401397	KR7015760002	1	1800		32	2032	2072	2112	225	225	225	225	225	225	225	225	225	225	225	225
oil/gas	South Korea	Asia	Eastern Asia	Seoincheon KOWEPO power station	8	서인천C/C		225	operating	1992		CC	LNG					Korea Western Power Co Ltd [100.0%]	Korea Electric Power Corp [100.0%]	37.5363	126.603	exact	Seo-gu			Incheon	https://www.gem.wiki/Seoincheon_KOWEPO_power_station	L100000401390	G100000401398	KR7015760002	1	1800	1800	32	2032	2072	2112	225	225	225	225	225	225	225	225	225	225	225	225
oil/gas	South Korea	Asia	Eastern Asia	Seoul power station	1			400	operating	2019		CC	LNG					Korea Midland Power Co Ltd [100.0%]	Korea Electric Power Corp [100.0%]	37.5442	126.92	exact	Seoul			Gyeonggi-do	https://www.gem.wiki/Seoul_power_station	L100000401398	G100000401399	KR7015760002	1	800		5	2059	2099	2139	400	400	400	400	400	400	400	400	400	400	400	400
oil/gas	South Korea	Asia	Eastern Asia	Seoul power station	2			400	operating	2019		CC	LNG					Korea Midland Power Co Ltd [100.0%]	Korea Electric Power Corp [100.0%]	37.5442	126.92	exact	Seoul			Gyeonggi-do	https://www.gem.wiki/Seoul_power_station	L100000401398	G100000401400	KR7015760002	1	800	800	5	2059	2099	2139	400	400	400	400	400	400	400	400	400	400	400	400
oil/gas	South Korea	Asia	Eastern Asia	Shin Pyeongtaek power station	CC1	신평택복합	Shin Pyeongtaek	950	operating	2019		CC	LNG					Shin Pyongtaek Power Co Ltd [100.0%]	GS Energy Corp; Korea Electric Power Corp	37.0038	126.795	exact	Pyeongtaek			Gyeonggi-do	https://www.gem.wiki/Shin_Pyeongtaek_power_station	L100000408898	G100000401401	KR7015760002	0.5	950	950	5	2059	2099	2139	475	475	475	475	475	475	475	475	475	475	475	475
oil/gas	South Korea	Asia	Eastern Asia	Shinincheon power station	1	신인천C/C	Seoinchon KOSPA/Seoincheon KOSPO/New Incheon Complex	450	operating	1997		CC	LNG					Korea Southern Power Co Ltd [100.0%]	Korea Electric Power Corp [100.0%]	37.508	126.616	exact	Seo-gu			Incheon	https://www.gem.wiki/Shinincheon_power_station	L100000401409	G100000401410	KR7015760002	1	1800		27	2037	2077	2117	450	450	450	450	450	450	450	450	450	450	450	450
oil/gas	South Korea	Asia	Eastern Asia	Shinincheon power station	2	신인천C/C	Seoinchon KOSPA/Seoincheon KOSPO/New Incheon Complex	450	operating	1997		CC	LNG					Korea Southern Power Co Ltd [100.0%]	Korea Electric Power Corp [100.0%]	37.508	126.616	exact	Seo-gu			Incheon	https://www.gem.wiki/Shinincheon_power_station	L100000401409	G100000401411	KR7015760002	1	1800		27	2037	2077	2117	450	450	450	450	450	450	450	450	450	450	450	450
oil/gas	South Korea	Asia	Eastern Asia	Shinincheon power station	3	신인천C/C	Seoinchon KOSPA/Seoincheon KOSPO/New Incheon Complex	450	operating	1997		CC	LNG					Korea Southern Power Co Ltd [100.0%]	Korea Electric Power Corp [100.0%]	37.508	126.616	exact	Seo-gu			Incheon	https://www.gem.wiki/Shinincheon_power_station	L100000401409	G100000401412	KR7015760002	1	1800		27	2037	2077	2117	450	450	450	450	450	450	450	450	450	450	450	450
oil/gas	South Korea	Asia	Eastern Asia	Shinincheon power station	4	신인천C/C	Seoinchon KOSPA/Seoincheon KOSPO/New Incheon Complex	450	operating	1997		CC	LNG					Korea Southern Power Co Ltd [100.0%]	Korea Electric Power Corp [100.0%]	37.508	126.616	exact	Seo-gu			Incheon	https://www.gem.wiki/Shinincheon_power_station	L100000401409	G100000401413	KR7015760002	1	1800	1800	27	2037	2077	2117	450	450	450	450	450	450	450	450	450	450	450	450
oil/gas	South Korea	Asia	Eastern Asia	Shinsejong power station	1		Shinsejong	630	construction	2024		CC	LNG					Korea Southern Power Co Ltd [100.0%]	Korea Electric Power Corp [100.0%]	36.5273	127.297	approximate	Sejong	Nuri-Ri	Yeongi-Myeon	Chungcheongnam-do	https://www.gem.wiki/Shinsejong_power_station	L100000406326	G100000406159	KR7015760002	1	630	630	0	2064	2104	2144	0	0	0	0	630	630	630	630	630	630	630	630
oil/gas	United Arab Emirates	Asia	Western Asia	Shuweihat S3 power plant	1	مجمع الشويهات للطاقة والمياه/محطة الشويهات S3 المستقلة للمياه والطاقة		823.5	operating	2014	2039	CC	NG					Korea Electric Power Corp [55.0%]; Sumitomo Corp [45.0%]	Korea Electric Power Corp [55.0%]; Sumitomo Corp [45.0%]	24.1535	52.5662	approximate	Jebel Dhanna			Abu Dhabi	https://www.gem.wiki/Shuweihat_S3_power_plant	L100000405594	G100000405051	KR7015760002	0.55	1647		10	2054	2094	2134	452.925	452.925	452.925	452.925	452.925	452.925	452.925	452.925	452.925	452.925	452.925	452.925
oil/gas	United Arab Emirates	Asia	Western Asia	Shuweihat S3 power plant	2	مجمع الشويهات للطاقة والمياه/محطة الشويهات S3 المستقلة للمياه والطاقة		823.5	operating	2014	2039	CC	NG					Korea Electric Power Corp [55.0%]; Sumitomo Corp [45.0%]	Korea Electric Power Corp [55.0%]; Sumitomo Corp [45.0%]	24.1535	52.5662	approximate	Jebel Dhanna			Abu Dhabi	https://www.gem.wiki/Shuweihat_S3_power_plant	L100000405594	G100000405052	KR7015760002	0.55	1647	1647	10	2054	2094	2134	452.925	452.925	452.925	452.925	452.925	452.925	452.925	452.925	452.925	452.925	452.925	452.925
oil/gas	Thailand	Asia	South-eastern Asia	Songkhla Chana power station	1			1700	announced			CC	LNG					Korea Western Power Co Ltd [100.0%]	Korea Electric Power Corp [100.0%]	7.31237	100.674	approximate	Chana Dist			Songkhla	https://www.gem.wiki/Songkhla_Chana_power_station	L100000407521	G100000409726	KR7015760002	1	1700	1700	-99	40	80	120	0	0	0	0	0	0	0	0	0	1700	1700	1700
oil/gas	Jamaica	Americas	Latin America and the Caribbean	South Jamaica Power Centre	1		Old Harbour power plant	194	operating	2019		CC	LNG					South Jamaica Power Co [100%]	Korea Electric Power Corp [40.0%]; Marubeni Corp [39.9%]; PetroCaribe Development Fund [10.0%]; Jamaica Public Service Co Ltd [10.0%]; other [0.0%]	17.8996	-77.1083	exact	Old Harbour Bay			St Catherine	https://gem.wiki/South_Jamaica_Power_Centre	L100000406599	G100000406670	KR7015760002	0.4	194	194	5	2059	2099	2139	77.6	77.6	77.6	77.6	77.6	77.6	77.6	77.6	77.6	77.6	77.6	77.6
oil/gas	South Korea	Asia	Eastern Asia	Taean power station	1			500	announced	2025		not found	LNG					Korea Western Power Co Ltd [100.0%]	Korea Electric Power Corp [100.0%]	36.9056	126.235	exact	Bangal	Wonbuk	Taean	Chungcheongnam-do	https://www.gem.wiki/Taean_power_station	L100000103483	G100000406161	KR7015760002	1	9446		-1	2065	2105	2145	0	0	0	0	0	500	500	500	500	500	500	500
oil/gas	South Korea	Asia	Eastern Asia	Taean power station	2			500	announced	2025		not found	LNG					Korea Western Power Co Ltd [100.0%]	Korea Electric Power Corp [100.0%]	36.9056	126.235	exact	Bangal	Wonbuk	Taean	Chungcheongnam-do	https://www.gem.wiki/Taean_power_station	L100000103483	G100000406162	KR7015760002	1	9446		-1	2065	2105	2145	0	0	0	0	0	500	500	500	500	500	500	500
oil/gas	South Korea	Asia	Eastern Asia	Taean power station	3			500	announced	2028		not found	LNG					Korea Western Power Co Ltd [100.0%]	Korea Electric Power Corp [100.0%]	36.9056	126.235	exact	Bangal	Wonbuk	Taean	Chungcheongnam-do	https://www.gem.wiki/Taean_power_station	L100000103483	G100000406163	KR7015760002	1	9446		-4	2068	2108	2148	0	0	0	0	0	0	0	0	500	500	500	500
oil/gas	South Korea	Asia	Eastern Asia	Taean power station	4			500	announced	2029		not found	LNG					Korea Western Power Co Ltd [100.0%]	Korea Electric Power Corp [100.0%]	36.9056	126.235	exact	Bangal	Wonbuk	Taean	Chungcheongnam-do	https://www.gem.wiki/Taean_power_station	L100000103483	G100000406164	KR7015760002	1	9446		-5	2069	2109	2149	0	0	0	0	0	0	0	0	0	500	500	500
oil/gas	South Korea	Asia	Eastern Asia	Taean power station	5			500	announced	2032		not found	LNG					Korea Western Power Co Ltd [100.0%]	Korea Electric Power Corp [100.0%]	36.9056	126.235	exact	Bangal	Wonbuk	Taean	Chungcheongnam-do	https://www.gem.wiki/Taean_power_station	L100000103483	G100000406165	KR7015760002	1	9446		-8	2072	2112	2152	0	0	0	0	0	0	0	0	0	0	0	0
oil/gas	South Korea	Asia	Eastern Asia	Taean power station	6			500	announced	2032		not found	LNG					Korea Western Power Co Ltd [100.0%]	Korea Electric Power Corp [100.0%]	36.9056	126.235	exact	Bangal	Wonbuk	Taean	Chungcheongnam-do	https://www.gem.wiki/Taean_power_station	L100000103483	G100000406166	KR7015760002	1	9446	9446	-8	2072	2112	2152	0	0	0	0	0	0	0	0	0	0	0	0
oil/gas	United States	Americas	Northern America	Trumbull Energy Center power station	CC1			950	construction	2026		CC	NG/D					Korea Overseas Infrastructure & Urban Development Corp Corp; Korea Southern Power Co Ltd; Siemens Energy Inc	Korea Electric Power Corp; Korea Overseas Infrastructure & Urban Development Corp Corp; Siemens Energy AG	41.1502	-80.8537	exact	Lordstown	Trumbull		Ohio	https://www.gem.wiki/Trumbull_Energy_Center_power_station	L100000408878	G100000413022	KR7015760002	0.333333	950	950	-2	2066	2106	2146	0	0	0	0	0	0	316.667	316.667	316.667	316.667	316.667	316.667
oil/gas	United States	Americas	Northern America	Ukudu power station	1		Dededo	180	construction	2024		CC	NG/D					Guam Ukudu Power LLC [100.0%]	Kansai Electric Power Co [60.0%]; Korea Electric Power Corp [40.0%]	13.524	144.807	approximate	Dededo			Guam	https://www.gem.wiki/Ukudu_power_station	L100000406935	G100000407918	KR7015760002	0.4	180	180	0	2064	2104	2144	0	0	0	0	72	72	72	72	72	72	72	72
oil/gas	South Korea	Asia	Eastern Asia	Ulsan power station	1			300	operating	1995		CC	LNG					Korea East-West Power Co Ltd [100.0%]	Korea Electric Power Corp [100.0%]	35.477	129.383	exact	Ulsan			Ulsan	https://www.gem.wiki/Ulsan_power_station	L100000401401	G100000401403	KR7015760002	1	1998		29	2035	2075	2115	300	300	300	300	300	300	300	300	300	300	300	300
oil/gas	South Korea	Asia	Eastern Asia	Ulsan power station	2			450	operating	1997		CC	LNG					Korea East-West Power Co Ltd [100.0%]	Korea Electric Power Corp [100.0%]	35.477	129.383	exact	Ulsan			Ulsan	https://www.gem.wiki/Ulsan_power_station	L100000401401	G100000401404	KR7015760002	1	1998		27	2037	2077	2117	450	450	450	450	450	450	450	450	450	450	450	450
oil/gas	South Korea	Asia	Eastern Asia	Ulsan power station	3			300	operating	1997		CC	LNG					Korea East-West Power Co Ltd [100.0%]	Korea Electric Power Corp [100.0%]	35.477	129.383	exact	Ulsan			Ulsan	https://www.gem.wiki/Ulsan_power_station	L100000401401	G100000412613	KR7015760002	1	1998		27	2037	2077	2117	300	300	300	300	300	300	300	300	300	300	300	300
oil/gas	South Korea	Asia	Eastern Asia	Ulsan power station	4			948	operating	2014		CC	LNG					Korea East-West Power Co Ltd [100.0%]	Korea Electric Power Corp [100.0%]	35.477	129.383	exact	Ulsan			Ulsan	https://www.gem.wiki/Ulsan_power_station	L100000401401	G100000401402	KR7015760002	1	1998	1998	10	2054	2094	2134	948	948	948	948	948	948	948	948	948	948	948	948
oil/gas	South Korea	Asia	Eastern Asia	Yeongheung power station	1		Yonghungdo	800	announced	2034		not found	LNG					Korea South-East Power Co Ltd [100.0%]	Korea Electric Power Corp [100.0%]	37.2369	126.436	exact	Oe-ri	Yeongheung	Ongjin	Incheon	https://www.gem.wiki/Yeongheung_power_station	L100000103466	G100000406170	KR7015760002	1	6680		-10	2074	2114	2154	0	0	0	0	0	0	0	0	0	0	0	0
oil/gas	South Korea	Asia	Eastern Asia	Yeongheung power station	2		Yonghungdo	800	announced	2034		not found	LNG					Korea South-East Power Co Ltd [100.0%]	Korea Electric Power Corp [100.0%]	37.2369	126.436	exact	Oe-ri	Yeongheung	Ongjin	Incheon	https://www.gem.wiki/Yeongheung_power_station	L100000103466	G100000406171	KR7015760002	1	6680	6680	-10	2074	2114	2154	0	0	0	0	0	0	0	0	0	0	0	0
oil/gas	South Korea	Asia	Eastern Asia	Yeongnam power station	1	영남파워		476	operating	2018		CC	NG					KOSPO YoungNam Power Co Ltd [100.0%]	Korea Electric Power Corp [50.0%]	35.514	129.383	exact	Nam-gu			Ulsan	https://www.gem.wiki/Yeongnam_power_station	L100000401413	G100000401414	KR7015760002	0.5	476	476	6	2058	2098	2138	238	238	238	238	238	238	238	238	238	238	238	238
oil/gas	South Korea	Asia	Eastern Asia	Yeongwol power station	1		Yong-Wol	848	operating	2010		CC	LNG					Korea Southern Power Co Ltd [100.0%]	Korea Electric Power Corp [100.0%]	37.1629	128.492	exact	Youngwol-si			Gyeongsangbuk-do	https://www.gem.wiki/Yeongwol_power_station	L100000401405	G100000401406	KR7015760002	1	848	848	14	2050	2090	2130	848	848	848	848	848	848	848	848	848	848	848	848
solar	United States	Americas	Northern America	Astoria solar farm	1		RE Astoria 1	100	operating	2016		PV						KEPCO		34.8442	-118.459	exact		Kern County		California	https://gem.wiki/Astoria_solar_farm	L804724	G805444	KR7015760002	1	175		8	2056	2096	2136	100	100	100	100	100	100	100	100	100	100	100	100
solar	United States	Americas	Northern America	Astoria solar farm	2		RE Astoria 2	75	operating	2016		PV						KEPCO		34.8366	-118.48	exact		Kern County		California	https://gem.wiki/Astoria_solar_farm	L804724	G805443	KR7015760002	1	175	175	8	2056	2096	2136	75	75	75	75	75	75	75	75	75	75	75	75
solar	United States	Americas	Northern America	Barren Ridge solar farm			RE Cinco Project, RE Barren Ridge	60	operating	2016		PV						KEPCO		35.2047	-118.069	exact		Kern County		California	https://gem.wiki/Barren_Ridge_solar_farm	L804725	G805445	KR7015760002	1	60	60	8	2056	2096	2136	60	60	60	60	60	60	60	60	60	60	60	60
solar	United States	Americas	Northern America	Cogentrix Of Alamosa solar farm			Alamosa Substation	30	operating	2012		PV						KEPCO		37.5986	-105.956	exact		Alamosa County		Colorado	https://gem.wiki/Cogentrix_Of_Alamosa_solar_farm	L804571	G805256	KR7015760002	1	30	30	12	2052	2092	2132	30	30	30	30	30	30	30	30	30	30	30	30
solar	Mexico	Americas	Latin America and the Caribbean	El Mayo Photovoltaic solar farm		Granja Solar Fotovoltaica El Mayo		126	operating	2021		PV						Korea Electric Power CORP (KEPCO); Sprott Korea		26.887	-109.362	exact		El Mayo	Hermosillo	Sonora	https://gem.wiki/El_Mayo_Photovoltaic_solar_farm	L807303	G808681	KR7015760002	0.5	126	126	3	2061	2101	2141	0	63	63	63	63	63	63	63	63	63	63	63
solar	Mexico	Americas	Latin America and the Caribbean	Horus Photovoltaic solar farm		Granja Solar Fotovoltaica Horus		119	operating	2023		PV						Korea Electric Power CORP (KEPCO); Sprott Korea		22.099	-102.32	exact			Pabellon De Arteaga	Aguascalientes	https://gem.wiki/Horus_Photovoltaic_solar_farm	L807304	G808682	KR7015760002	0.5	119	119	1	2063	2103	2143	0	0	0	59.5	59.5	59.5	59.5	59.5	59.5	59.5	59.5	59.5
solar	Guam	Oceania	Micronesia	Mangilao solar farm				60	operating	2022		PV						Korea Electric Power CORP (KEPCO); Foss and CO		13.4891	144.861	exact		Mangilao Municipality		Guam	https://gem.wiki/Mangilao_solar_farm	L805602	G806445	KR7015760002	0.5	60	60	2	2062	2102	2142	0	0	30	30	30	30	30	30	30	30	30	30
solar	Japan	Asia	Eastern Asia	Shin Chitose Kashiwadai Solar Power Plant		新千歳柏台太陽光発電所	Shin-Chitose Kashiwadai, LSIS Shin Chitose megasolar PV Park, New Chitose Kashiwadai Solar Power Plant	28	operating	2017		PV						Japan's Energy Products Corporation; Korea Electric Power CORP (KEPCO)		42.8033	141.686	exact	Chitose				https://gem.wiki/Shin_Chitose_Kashiwadai_Solar_Power_Plant	L801373	G801577	KR7015760002	0.5	28	28	7	2057	2097	2137	14	14	14	14	14	14	14	14	14	14	14	14
solar	Mexico	Americas	Latin America and the Caribbean	Tastiota Photovoltaic solar farm		Granja Solar Fotovoltaica Tastiota		125	operating	2021		PV						Korea Electric Power CORP (KEPCO); Sprott Korea		28.3495	-111.341	exact		Tastiota	Hermosillo	Sonora	https://gem.wiki/Tastiota_Photovoltaic_solar_farm	L807305	G808683	KR7015760002	0.5	125	125	3	2061	2101	2141	0	62.5	62.5	62.5	62.5	62.5	62.5	62.5	62.5	62.5	62.5	62.5
wind	Jordan	Asia	Western Asia	Fujeij wind farm			Fujeiji	89	operating	2019		onshore						KEPCO		30.5604	35.63	exact		Busayra Sub-District	Busayra District	Tafilah	https://gem.wiki/Fujeij_wind_farm	L905928	G908107	KR7015760002	1	89	89	5	2059	2099	2139	89	89	89	89	89	89	89	89	89	89	89	89
wind	South Korea	Asia	Eastern Asia	Gyeongbuk wind farm			Gyeongbuk Demonstration Complex Offshore Wind Farm	200	shelved			offshore mount unknown						Gyeongbuk Technopark; Gyeonbuk Province; Korea Hydro & Nuclear Power (KHNP) CO LTD; Korea Electric Power CORP (KEPCO); Korea Institute of Energy Research		36.421	129.442	approximate		Yeongdeok-gun		North Gyeongsang Province	https://gem.wiki/Gyeongbuk_wind_farm	L900917	G901050	KR7015760002	0.2	200	200	-99	40	80	120	0	0	0	0	0	0	0	0	0	0	0	0
wind	South Korea	Asia	Eastern Asia	Jeju Hanlim wind farm			Hallym Wind Farm, Hallym Offshore Wind Power Demonstration Offshore Wind Farm, Hanrim-eup	100	construction	2024		offshore mount unknown						Korea Midland Power CO LTD (KOMIPO); Korea Electric Power CORP (KEPCO); KEPCO Engineering & Construction Company INC; Hyundai Engineering & Construction CO LTD		33.4454	126.254	approximate	Hanlim-eup			Jeju Province	https://gem.wiki/Jeju_Hanlim_wind_farm	L900750	G900858	KR7015760002	0.25	100	100	0	2064	2104	2144	0	0	0	0	25	25	25	25	25	25	25	25
wind	South Korea	Asia	Eastern Asia	Sinan (KEPCO) Wind Farm	1		Sinan - Kepco	1500	pre-construction			offshore mount unknown						Korea Electric Power CORP (KEPCO); Jeonnam Development CORP		34.963	126.002	approximate	Jaeun-myeon	Sinan-gun		South Jeolla Province	https://gem.wiki/Sinan_(KEPCO)_Wind_Farm	L900931	G901065	KR7015760002	0.5	1500	1500	-99	40	80	120	0	0	0	0	0	0	0	0	0	0	0	0
wind	South Korea	Asia	Eastern Asia	Southwest Offshore wind farm	2		Seonam Offshore Wind Farm	460	pre-construction	2027		offshore hard mount						Korea Offshore Wind Power (KOWP); Korea Electric Power CORP (KEPCO) [25%]; other		35.5382	126.223	approximate		Gochang-gun		North Jeolla Province	https://gem.wiki/Southwest_Offshore_wind_farm	L900748	G901079	KR7015760002	0.333333	2460		-3	2067	2107	2147	0	0	0	0	0	0	0	0	0	0	0	0
wind	South Korea	Asia	Eastern Asia	Southwest Offshore wind farm	3		Southwest Offshore - phase 3 Offshore Wind Farm	2000	pre-construction	2027		offshore mount unknown						Korea East-West Power CO LTD; Korea Electric Power CORP (KEPCO); Korea Hydro & Nuclear Power (KHNP) CO LTD; Korea South-East Power CO LTD (KOEN); Korea Midland Power CO LTD (KOMIPO); Korea Southern Power CO LTD; Korea Western Power CO LTD		35.5909	126.223	approximate		Gochang-gun		North Jeolla Province	https://gem.wiki/Southwest_Offshore_wind_farm	L900748	G901080	KR7015760002	0.142857	2460	2460	-3	2067	2107	2147	0	0	0	0	0	0	0	0	0	0	0	0
wind	South Korea	Asia	Eastern Asia	Yeongwol wind farm			Yeongwol Eco Wind	46	construction	2023		onshore						Korea Electric Power CORP (KEPCO); E1 CORP		37.2422	128.384	approximate		Yeongwol-gun		Gangwon Province	https://gem.wiki/Yeongwol_wind_farm	L916889	G920959	KR7015760002	0.5	46	46	1	2063	2103	2143	0	0	0	23	23	23	23	23	23	23	23	23
								116757																										2744	2744	0	0	60024.8	60782.4	62361	63415.2	64442.2	68428.2	71486.9	72637.8	74637.8	77131.6	77631.6	78631.6
								87410																													Coal	36622.5	37254.6	38216.2	38771.9	38771.9	38771.9	38771.9	38771.9	38771.9	38971.9	38971.9	38971.9
								86598																													Oil&Gas	3093.01	3093.01	3680.01	3826.01	4198.01	4198.01	5075.68	5169.43	5169.43	5263.18	5263.18	5263.18
																																					LNG	19941.3	19941.3	19941.3	20211.3	20841.3	24827.3	27008.3	28065.5	30065.5	32265.5	32765.5	33765.5
																																					Fossil fuel	59656.8	60288.9	61837.5	62809.2	63811.2	67797.2	70855.9	72006.8	74006.8	76500.6	77000.6	78000.6
																																					Renewables	368	493.5	523.5	606	631	631	631	631	631	631	631	631
																																					Oil	286.9	286.9	286.9	286.9	286.9	286.9	286.9	286.9	286.9	286.9	286.9	286.9
																																					Gas	23034.3	23034.3	23621.3	24037.3	25039.3	29025.3	32084	33234.9	35234.9	37528.7	38028.7	39028.7
																																					Nuclear	0	0	0	0	0	0	0	0	0	0	0	0
																																					Wind	89	89	89	112	137	137	137	137	137	137	137	137
																																					solar	279	404.5	434.5	494	494	494	494	494	494	494	494	494
																																					Oil&Gas&LNG	23034.3	23034.3	23621.3	24037.3	25039.3	29025.3	32084	33234.9	35234.9	37528.7	38028.7	39028.7
																																					Total capacity without discounts	75564	80963	84557	87456
																																					Fossil fuel capacity without discounts	75182	80330	83864	86598
[truncated: 19 more columns]

## Sheet: KEPCO_TP
Type	Country/area	Region	Subregion	Plant / Project name	Unit / Phase name	Plant / Project name (local)	Plant / Project name (other)	Capacity (MW)	Status	Start year	Retired year	Technology	Fuel	Country/area 1 (hydropower only)	Country/area 2 (hydropower only)	Country/area 1 Capacity (MW) (hydropower only)	Country/area 2 Capacity (MW) (hydropower only)	Owner	Parent	Latitude	Longitude	Location accuracy	City	Local area (taluk, county)	Major area (prefecture, district)	Subnational unit (state, province)	GEM.Wiki URL	GEM location ID	GEM unit/phase ID	CompISIN	Ownership	Plant capacity	Plant capacity	Age	Reinvestment year	Reinvestment year	Reinvestment year	2020	2021	2022	2023	2024	2025	2026	2027	2028	2029	2030	2031
coal	South Korea	Asia	Eastern Asia	Anin power station	Unit 1	강릉 안인	Gnagneung, Gangnung Anin, Gangreung Anin, 강릉 안인	1040	operating	2022		ultra-supercritical	unknown					Gangneung Eco Power [100%]	other unknown/mixed entity types [42.0%]; Korea Electric Power Corp [29.0%]; Samsung C&T Corp [29.0%]	37.7332	128.979	exact	Gangneung			Gangwon	https://www.gem.wiki/Anin_power_station	L100000103457	G100000100246	KR7015760002	0.29	2080		2	2062	2102	2142	0	0	301.6	301.6	301.6	301.6	301.6	301.6	301.6	301.6	301.6	301.6
coal	South Korea	Asia	Eastern Asia	Anin power station	Unit 2	강릉 안인	Gnagneung, Gangnung Anin, Gangreung Anin, 강릉 안인	1040	operating	2023		ultra-supercritical	unknown					Gangneung Eco Power [100%]	other unknown/mixed entity types [42.0%]; Korea Electric Power Corp [29.0%]; Samsung C&T Corp [29.0%]	37.7332	128.979	exact	Gangneung			Gangwon	https://www.gem.wiki/Anin_power_station	L100000103457	G100000100247	KR7015760002	0.29	2080	2080	1	2063	2103	2143	0	0	0	301.6	301.6	301.6	301.6	301.6	301.6	301.6	301.6	301.6
coal	South Korea	Asia	Eastern Asia	Boryeong power station	Unit 5	보령 발전소	Poryong power station, 보령 발전소	500	operating	1993	2026	supercritical	bituminous					Korea Midland Power [100%]	Korea Electric Power Corp [100.0%]	36.4009	126.491	exact	Poryong-gun	Ocheon	Poryong	South Chungcheong	https://www.gem.wiki/Boryeong_power_station	L100000103477	G100000109273	KR7015760002	1	5400		31	2033	2073	2113	500	500	500	500	500	500	0	0	0	0	0	0
coal	South Korea	Asia	Eastern Asia	Boryeong power station	Unit 3	보령 발전소	Poryong power station, 보령 발전소	550	operating	1993	2043	supercritical	bituminous					Korea Midland Power [100%]	Korea Electric Power Corp [100.0%]	36.4009	126.491	exact	Poryong-gun	Ocheon	Poryong	South Chungcheong	https://www.gem.wiki/Boryeong_power_station	L100000103477	G100000109271	KR7015760002	1	5400		31	2033	2073	2113	550	550	550	550	550	550	550	550	550	550	550	550
coal	South Korea	Asia	Eastern Asia	Boryeong power station	Unit 4	보령 발전소	Poryong power station, 보령 발전소	500	operating	1993	2043	supercritical	bituminous					Korea Midland Power [100%]	Korea Electric Power Corp [100.0%]	36.4009	126.491	exact	Poryong-gun	Ocheon	Poryong	South Chungcheong	https://www.gem.wiki/Boryeong_power_station	L100000103477	G100000109272	KR7015760002	1	5400		31	2033	2073	2113	500	500	500	500	500	500	500	500	500	500	500	500
coal	South Korea	Asia	Eastern Asia	Boryeong power station	Unit 6	보령 발전소	Poryong power station, 보령 발전소	500	operating	1994	2026	supercritical	bituminous					Korea Midland Power [100%]	Korea Electric Power Corp [100.0%]	36.4009	126.491	exact	Poryong-gun	Ocheon	Poryong	South Chungcheong	https://www.gem.wiki/Boryeong_power_station	L100000103477	G100000109274	KR7015760002	1	5400		30	2034	2074	2114	500	500	500	500	500	500	0	0	0	0	0	0
coal	South Korea	Asia	Eastern Asia	Boryeong power station	Unit 7	보령 발전소	Poryong power station, 보령 발전소	500	operating	2008	2038	ultra-supercritical	bituminous					Korea Midland Power [100%]	Korea Electric Power Corp [100.0%]	36.4009	126.491	exact	Poryong-gun	Ocheon	Poryong	South Chungcheong	https://www.gem.wiki/Boryeong_power_station	L100000103477	G100000109275	KR7015760002	1	5400		16	2048	2088	2128	500	500	500	500	500	500	500	500	500	500	500	500
coal	South Korea	Asia	Eastern Asia	Boryeong power station	Unit 8	보령 발전소	Poryong power station, 보령 발전소	500	operating	2008	2038	ultra-supercritical	bituminous					Korea Midland Power [100%]	Korea Electric Power Corp [100.0%]	36.4009	126.491	exact	Poryong-gun	Ocheon	Poryong	South Chungcheong	https://www.gem.wiki/Boryeong_power_station	L100000103477	G100000109276	KR7015760002	1	5400	5400	16	2048	2088	2128	500	500	500	500	500	500	500	500	500	500	500	500
coal	South Korea	Asia	Eastern Asia	Bukpyung power station	Unit 1	북평화력	Buk-Pyeong power station; GS Donghae power station, 북평화력	595	operating	2017	2047	supercritical	anthracite					ST International; Korea East-West Power	Korea Electric Power Corp; ST International	37.4805	129.143	exact	Donghae			Gangwon	https://www.gem.wiki/Bukpyung_power_station	L100000103458	G100000101094	KR7015760002	0.5	1190		7	2057	2097	2137	297.5	297.5	297.5	297.5	297.5	297.5	297.5	297.5	297.5	297.5	297.5	297.5
coal	South Korea	Asia	Eastern Asia	Bukpyung power station	Unit 2	북평화력	Buk-Pyeong power station; GS Donghae power station, 북평화력	595	operating	2017	2047	supercritical	anthracite					ST International; Korea East-West Power	Korea Electric Power Corp; ST International	37.4805	129.143	exact	Donghae			Gangwon	https://www.gem.wiki/Bukpyung_power_station	L100000103458	G100000101095	KR7015760002	0.5	1190	1190	7	2057	2097	2137	297.5	297.5	297.5	297.5	297.5	297.5	297.5	297.5	297.5	297.5	297.5	297.5
coal	Indonesia	Asia	South-eastern Asia	Cirebon power station	Unit 1		井里汶电站	660	operating	2012	2037	supercritical	unknown					PT Cirebon Electric Power [100%]	Marubeni Corp [32.5%]; Korea Electric Power Corp [27.5%]; PT Indika Energy Tbk [20.0%]; ST International Corp [20.0%]	-6.77029	108.615	exact	Kanci Kulon	Astanajapura	Cirebon	West Java	https://www.gem.wiki/Cirebon_power_station	L100000102814	G100000101590	KR7015760002	0.275	1584		12	2052	2092	2132	181.5	181.5	181.5	181.5	181.5	181.5	181.5	181.5	181.5	181.5	181.5	181.5
coal	Indonesia	Asia	South-eastern Asia	Cirebon power station	Unit 2		井里汶电站	924	operating	2023		ultra-supercritical	unknown					PT Cirebon Electric Power [100%]	Marubeni Corp [32.5%]; Korea Electric Power Corp [27.5%]; PT Indika Energy Tbk [20.0%]; ST International Corp [20.0%]	-6.77029	108.615	exact	Kanci Kulon	Astanajapura	Cirebon	West Java	https://www.gem.wiki/Cirebon_power_station	L100000102814	G100000101591	KR7015760002	0.275	1584	1584	1	2063	2103	2143	0	0	0	254.1	254.1	254.1	254.1	254.1	254.1	254.1	254.1	254.1
coal	South Korea	Asia	Eastern Asia	Dangjin power station	Unit 1	당진 발전소	당진 발전소	500	operating	1999	2029	supercritical	bituminous					Korea East-West Power [100%]	Korea Electric Power Corp [100.0%]	37.0551	126.512	exact	Gyoro	Seokmun	Dangjin	South Chungcheong	https://www.gem.wiki/Dangjin_power_station	L100000103480	G100000101952	KR7015760002	1	6040		25	2039	2079	2119	500	500	500	500	500	500	500	500	500	0	0	0
coal	South Korea	Asia	Eastern Asia	Dangjin power station	Unit 2	당진 발전소	당진 발전소	500	operating	1999	2029	supercritical	bituminous					Korea East-West Power [100%]	Korea Electric Power Corp [100.0%]	37.0551	126.512	exact	Gyoro	Seokmun	Dangjin	South Chungcheong	https://www.gem.wiki/Dangjin_power_station	L100000103480	G100000101954	KR7015760002	1	6040		25	2039	2079	2119	500	500	500	500	500	500	500	500	500	0	0	0
coal	South Korea	Asia	Eastern Asia	Dangjin power station	Unit 3	당진 발전소	당진 발전소	500	operating	2000	2030	supercritical	bituminous					Korea East-West Power [100%]	Korea Electric Power Corp [100.0%]	37.0551	126.512	exact	Gyoro	Seokmun	Dangjin	South Chungcheong	https://www.gem.wiki/Dangjin_power_station	L100000103480	G100000101955	KR7015760002	1	6040		24	2040	2080	2120	500	500	500	500	500	500	500	500	500	500	0	0
coal	South Korea	Asia	Eastern Asia	Dangjin power station	Unit 4	당진 발전소	당진 발전소	500	operating	2001	2030	supercritical	bituminous					Korea East-West Power [100%]	Korea Electric Power Corp [100.0%]	37.0551	126.512	exact	Gyoro	Seokmun	Dangjin	South Chungcheong	https://www.gem.wiki/Dangjin_power_station	L100000103480	G100000101956	KR7015760002	1	6040		23	2041	2081	2121	500	500	500	500	500	500	500	500	500	500	0	0
coal	South Korea	Asia	Eastern Asia	Dangjin power station	Unit 5	당진 발전소	당진 발전소	500	operating	2005	2035	ultra-supercritical	bituminous					Korea East-West Power [100%]	Korea Electric Power Corp [100.0%]	37.0551	126.512	exact	Gyoro	Seokmun	Dangjin	South Chungcheong	https://www.gem.wiki/Dangjin_power_station	L100000103480	G100000101957	KR7015760002	1	6040		19	2045	2085	2125	500	500	500	500	500	500	500	500	500	500	500	500
coal	South Korea	Asia	Eastern Asia	Dangjin power station	Unit 6	당진 발전소	당진 발전소	500	operating	2006	2036	ultra-supercritical	bituminous					Korea East-West Power [100%]	Korea Electric Power Corp [100.0%]	37.0551	126.512	exact	Gyoro	Seokmun	Dangjin	South Chungcheong	https://www.gem.wiki/Dangjin_power_station	L100000103480	G100000101958	KR7015760002	1	6040		18	2046	2086	2126	500	500	500	500	500	500	500	500	500	500	500	500
coal	South Korea	Asia	Eastern Asia	Dangjin power station	Unit 7	당진 발전소	당진 발전소	500	operating	2007	2037	ultra-supercritical	bituminous					Korea East-West Power [100%]	Korea Electric Power Corp [100.0%]	37.0551	126.512	exact	Gyoro	Seokmun	Dangjin	South Chungcheong	https://www.gem.wiki/Dangjin_power_station	L100000103480	G100000101959	KR7015760002	1	6040		17	2047	2087	2127	500	500	500	500	500	500	500	500	500	500	500	500
coal	South Korea	Asia	Eastern Asia	Dangjin power station	Unit 8	당진 발전소	당진 발전소	500	operating	2007	2037	ultra-supercritical	bituminous					Korea East-West Power [100%]	Korea Electric Power Corp [100.0%]	37.0551	126.512	exact	Gyoro	Seokmun	Dangjin	South Chungcheong	https://www.gem.wiki/Dangjin_power_station	L100000103480	G100000101960	KR7015760002	1	6040		17	2047	2087	2127	500	500	500	500	500	500	500	500	500	500	500	500
coal	South Korea	Asia	Eastern Asia	Dangjin power station	Unit 9	당진 발전소	당진 발전소	1020	operating	2016	2045	ultra-supercritical	bituminous					Korea East-West Power [100%]	Korea Electric Power Corp [100.0%]	37.0551	126.512	exact	Dangjin			South Chungcheong	https://www.gem.wiki/Dangjin_power_station	L100000103480	G100000101961	KR7015760002	1	6040		8	2056	2096	2136	1020	1020	1020	1020	1020	1020	1020	1020	1020	1020	1020	1020
coal	South Korea	Asia	Eastern Asia	Dangjin power station	Unit 10	당진 발전소	당진 발전소	1020	operating	2016	2046	ultra-supercritical	bituminous					Korea East-West Power [100%]	Korea Electric Power Corp [100.0%]	37.0551	126.512	exact	Gyoro	Seokmun	Dangjin	South Chungcheong	https://www.gem.wiki/Dangjin_power_station	L100000103480	G100000101953	KR7015760002	1	6040	6040	8	2056	2096	2136	1020	1020	1020	1020	1020	1020	1020	1020	1020	1020	1020	1020
coal	South Korea	Asia	Eastern Asia	Donghae power station	Unit 1	동해 발전소	East Sea power station, 동해 발전소	200	operating	1998	2028	subcritical	anthracite					Korea East-West Power [100%]	Korea Electric Power Corp [100.0%]	37.4863	129.147	exact	Donghae		Donghae	Gangwon	https://www.gem.wiki/Donghae_power_station	L100000103460	G100000102425	KR7015760002	1	400		26	2038	2078	2118	200	200	200	200	200	200	200	200	0	0	0	0
coal	South Korea	Asia	Eastern Asia	Donghae power station	Unit 2	동해 발전소	East Sea power station, 동해 발전소	200	operating	1999	2029	subcritical	anthracite					Korea East-West Power [100%]	Korea Electric Power Corp [100.0%]	37.4863	129.147	exact	Donghae		Donghae	Gangwon	https://www.gem.wiki/Donghae_power_station	L100000103460	G100000102426	KR7015760002	1	400	400	25	2039	2079	2119	200	200	200	200	200	200	200	200	200	0	0	0
coal	South Korea	Asia	Eastern Asia	Goseong Green power station	Unit 1	고성그린파워	Goseong Hi, Goseung Hai, Goseong High, 고성그린파워	1040	operating	2021		ultra-supercritical	unknown					Goseong Green Power [100%]	other unknown/mixed entity types [52.0%]; Korea Electric Power Corp [29.0%]; SK Gas Co Ltd [19.0%]	34.9049	128.125	exact	Hai-myeon	Geumseong	Hadong	South Gyeongsang	https://www.gem.wiki/Goseong_Green_power_station	L100000103484	G100000103106	KR7015760002	0.29	2080		3	2061	2101	2141	0	301.6	301.6	301.6	301.6	301.6	301.6	301.6	301.6	301.6	301.6	301.6
coal	South Korea	Asia	Eastern Asia	Goseong Green power station	Unit 2	고성그린파워	Goseong Hi, Goseung Hai, Goseong High, 고성그린파워	1040	operating	2021		ultra-supercritical	unknown					Goseong Green Power [100%]	other unknown/mixed entity types [52.0%]; Korea Electric Power Corp [29.0%]; SK Gas Co Ltd [19.0%]	34.9049	128.125	exact	Hai-myeon	Geumseong	Hadong	South Gyeongsang	https://www.gem.wiki/Goseong_Green_power_station	L100000103484	G100000103107	KR7015760002	0.29	2080	2080	3	2061	2101	2141	0	301.6	301.6	301.6	301.6	301.6	301.6	301.6	301.6	301.6	301.6	301.6
coal	South Korea	Asia	Eastern Asia	Hadong power station	Unit 1	하동 발전소	하동 발전소	500	operating	1997	2026	supercritical	bituminous					Korea Southern Power [100%]	Korea Electric Power Corp [100.0%]	34.9524	127.82	exact	Gadeok	Geumseong	Hadong	South Gyeongsang	https://www.gem.wiki/Hadong_power_station	L100000103485	G100000103526	KR7015760002	1	7000		27	2037	2077	2117	500	500	500	500	500	500	0	0	0	0	0	0
coal	South Korea	Asia	Eastern Asia	Hadong power station	Unit 2	하동 발전소	하동 발전소	500	operating	1997	2027	supercritical	bituminous					Korea Southern Power [100%]	Korea Electric Power Corp [100.0%]	34.9524	127.82	exact	Gadeok	Geumseong	Hadong	South Gyeongsang	https://www.gem.wiki/Hadong_power_station	L100000103485	G100000103527	KR7015760002	1	7000		27	2037	2077	2117	500	500	500	500	500	500	500	0	0	0	0	0
coal	South Korea	Asia	Eastern Asia	Hadong power station	Unit 3	하동 발전소	하동 발전소	500	operating	1998	2028	supercritical	bituminous					Korea Southern Power [100%]	Korea Electric Power Corp [100.0%]	34.9524	127.82	exact	Gadeok	Geumseong	Hadong	South Gyeongsang	https://www.gem.wiki/Hadong_power_station	L100000103485	G100000103528	KR7015760002	1	7000		26	2038	2078	2118	500	500	500	500	500	500	500	500	0	0	0	0
coal	South Korea	Asia	Eastern Asia	Hadong power station	Unit 4	하동 발전소	하동 발전소	500	operating	1999	2028	supercritical	bituminous					Korea Southern Power [100%]	Korea Electric Power Corp [100.0%]	34.9524	127.82	exact	Gadeok	Geumseong	Hadong	South Gyeongsang	https://www.gem.wiki/Hadong_power_station	L100000103485	G100000103529	KR7015760002	1	7000		25	2039	2079	2119	500	500	500	500	500	500	500	500	0	0	0	0
coal	South Korea	Asia	Eastern Asia	Hadong power station	Unit 5	하동 발전소	하동 발전소	500	operating	2000	2031	supercritical	bituminous					Korea Southern Power [100%]	Korea Electric Power Corp [100.0%]	34.9524	127.82	exact	Gadeok	Geumseong	Hadong	South Gyeongsang	https://www.gem.wiki/Hadong_power_station	L100000103485	G100000103530	KR7015760002	1	7000		24	2040	2080	2120	500	500	500	500	500	500	500	500	500	500	500	0
coal	South Korea	Asia	Eastern Asia	Hadong power station	Unit 6	하동 발전소	하동 발전소	500	operating	2001	2031	supercritical	bituminous					Korea Southern Power [100%]	Korea Electric Power Corp [100.0%]	34.9524	127.82	exact	Gadeok	Geumseong	Hadong	South Gyeongsang	https://www.gem.wiki/Hadong_power_station	L100000103485	G100000103531	KR7015760002	1	7000		23	2041	2081	2121	500	500	500	500	500	500	500	500	500	500	500	0
coal	South Korea	Asia	Eastern Asia	Hadong power station	Unit 7	하동 발전소	하동 발전소	500	operating	2008	2038	ultra-supercritical	bituminous					Korea Southern Power [100%]	Korea Electric Power Corp [100.0%]	34.9524	127.82	exact	Gadeok	Geumseong	Hadong	South Gyeongsang	https://www.gem.wiki/Hadong_power_station	L100000103485	G100000103532	KR7015760002	1	7000		16	2048	2088	2128	500	500	500	500	500	500	500	500	500	500	500	500
coal	South Korea	Asia	Eastern Asia	Hadong power station	Unit 8	하동 발전소	하동 발전소	500	operating	2009	2039	ultra-supercritical	bituminous					Korea Southern Power [100%]	Korea Electric Power Corp [100.0%]	34.9524	127.82	exact	Gadeok	Geumseong	Hadong	South Gyeongsang	https://www.gem.wiki/Hadong_power_station	L100000103485	G100000103533	KR7015760002	1	7000	7000	15	2049	2089	2129	500	500	500	500	500	500	500	500	500	500	500	500
coal	China	Asia	Eastern Asia	High River power station	Unit 1	潞安长子高河低热值煤电厂		660	operating	2021		ultra-supercritical	waste coal					Shanxi Luguang Power Generation [100%]	An Hui Wenergy Co Ltd [50.0%]; Shanxi State-Owned Capital Investment and Operation Co Ltd [21.2%]; KEPCO Shanxi International [17.0%]; KEPCO Woori sprott Global Prive [4.0%]; Power Development [3.5%]; Shanxi Gemeng International Energy Group Co Ltd [2.4%]; other [2.0%]	36.1651	112.962	exact	Gaohe	Changzi	Changzhi	Shanxi	https://www.gem.wiki/High_River_power_station	L100000101468	G100000103885	KR7015760002	0.17	1320		3	2061	2101	2141	0	112.2	112.2	112.2	112.2	112.2	112.2	112.2	112.2	112.2	112.2	112.2
coal	China	Asia	Eastern Asia	High River power station	Unit 2	潞安长子高河低热值煤电厂		660	operating	2021		ultra-supercritical	waste coal					Shanxi Luguang Power Generation [100%]	An Hui Wenergy Co Ltd [50.0%]; Shanxi State-Owned Capital Investment and Operation Co Ltd [21.2%]; KEPCO Shanxi International [17.0%]; KEPCO Woori sprott Global Prive [4.0%]; Power Development [3.5%]; Shanxi Gemeng International Energy Group Co Ltd [2.4%]; other [2.0%]	36.1651	112.962	exact	Gaohe	Changzi	Changzhi	Shanxi	https://www.gem.wiki/High_River_power_station	L100000101468	G100000103886	KR7015760002	0.17	1320	1320	3	2061	2101	2141	0	112.2	112.2	112.2	112.2	112.2	112.2	112.2	112.2	112.2	112.2	112.2
coal	South Korea	Asia	Eastern Asia	Honam power station	Unit 1	호남	호남 1 (Unit 1), 호남 2 (Unit 2)	250	retired	1973	2021	subcritical	bituminous					Korea East-West Power [100%]	Korea Electric Power Corp [100.0%]	34.8544	127.735	exact		Wolnae	Yeosu	North Jeolla	https://www.gem.wiki/Honam_power_station	L100000103472	G100000103929	KR7015760002	1	500		51	2013	2053	2093	250	0	0	0	0	0	0	0	0	0	0	0
coal	South Korea	Asia	Eastern Asia	Honam power station	Unit 2	호남	호남 1 (Unit 1), 호남 2 (Unit 2)	250	retired	1973	2021	subcritical	bituminous					Korea East-West Power [100%]	Korea Electric Power Corp [100.0%]	34.8544	127.735	exact		Wolnae	Yeosu	North Jeolla	https://www.gem.wiki/Honam_power_station	L100000103472	G100000103930	KR7015760002	1	500	500	51	2013	2053	2093	250	0	0	0	0	0	0	0	0	0	0	0
coal	China	Asia	Eastern Asia	Jiexiu Chongguang power station	Unit 1	山西国际能源介休崇光低热值煤电厂	Jiexiu Gangue power station	350	operating	2020		supercritical	waste coal					Shanxi Chongguang Power Generation [100%]	Shanxi Anyi Hongshan PORCELAIN Co Ltd [22.5%]; Jiexiu Yihong Investment Co Ltd [21.6%]; Shanxi State-Owned Capital Investment and Operation Co Ltd [21.6%]; KEPCO Shanxi International [17.3%]; Shanxi Ansheng Technology Development Co Ltd [4.9%]; KEPCO Woori sprott Global Prive [4.1%]; Power Development [3.6%]; Shanxi Gemeng International Energy Group Co Ltd [2.4%]; other [2.0%]	37.1065	111.996	exact	Yian Town	Jiexiu	Jinzhong	Shanxi	https://www.gem.wiki/Jiexiu_Chongguang_power_station	L100000101486	G100000105165	KR7015760002	0.173	700		4	2060	2100	2140	60.55	60.55	60.55	60.55	60.55	60.55	60.55	60.55	60.55	60.55	60.55	60.55
coal	China	Asia	Eastern Asia	Jiexiu Chongguang power station	Unit 2	山西国际能源介休崇光低热值煤电厂	Jiexiu Gangue power station	350	operating	2021		supercritical	waste coal					Shanxi Chongguang Power Generation [100%]	Shanxi Anyi Hongshan PORCELAIN Co Ltd [22.5%]; Jiexiu Yihong Investment Co Ltd [21.6%]; Shanxi State-Owned Capital Investment and Operation Co Ltd [21.6%]; KEPCO Shanxi International [17.3%]; Shanxi Ansheng Technology Development Co Ltd [4.9%]; KEPCO Woori sprott Global Prive [4.1%]; Power Development [3.6%]; Shanxi Gemeng International Energy Group Co Ltd [2.4%]; other [2.0%]	37.1065	111.996	exact	Yian Town	Jiexiu	Jinzhong	Shanxi	https://www.gem.wiki/Jiexiu_Chongguang_power_station	L100000101486	G100000105166	KR7015760002	0.173	700		3	2061	2101	2141	0	60.55	60.55	60.55	60.55	60.55	60.55	60.55	60.55	60.55	60.55	60.55
coal	China	Asia	Eastern Asia	Lingshi Qiguang power station	Unit 1	山西国际能源灵石启光低热值煤发电厂		350	operating	2019		supercritical	waste coal					Shanxi Qiguang Power Generation [100%]	Lingshi Deguangyi Investment and Trade Co Ltd [24.1%]; Lingshi Xinyuan Investment and Trade Co Ltd [24.1%]; Shanxi State-Owned Capital Investment and Operation Co Ltd [21.6%]; KEPCO Shanxi International [17.3%]; KEPCO Woori sprott Global Prive [4.1%]; Power Development [3.6%]; other [2.8%]; Shanxi Gemeng International Energy Group Co Ltd [2.4%]	36.8206	111.626	exact	Duanchun Town	Lingshi	Jinzhong	Shanxi	https://www.gem.wiki/Lingshi_Qiguang_power_station	L100000101492	G100000106307	KR7015760002	0.173	700		5	2059	2099	2139	60.55	60.55	60.55	60.55	60.55	60.55	60.55	60.55	60.55	60.55	60.55	60.55
coal	China	Asia	Eastern Asia	Lingshi Qiguang power station	Unit 2	山西国际能源灵石启光低热值煤发电厂		350	operating	2019		supercritical	waste coal					Shanxi Qiguang Power Generation [100%]	Lingshi Deguangyi Investment and Trade Co Ltd [24.1%]; Lingshi Xinyuan Investment and Trade Co Ltd [24.1%]; Shanxi State-Owned Capital Investment and Operation Co Ltd [21.6%]; KEPCO Shanxi International [17.3%]; KEPCO Woori sprott Global Prive [4.1%]; Power Development [3.6%]; other [2.8%]; Shanxi Gemeng International Energy Group Co Ltd [2.4%]	36.8206	111.626	exact	Duanchun Town	Lingshi	Jinzhong	Shanxi	https://www.gem.wiki/Lingshi_Qiguang_power_station	L100000101492	G100000106308	KR7015760002	0.173	700	700	5	2059	2099	2139	60.55	60.55	60.55	60.55	60.55	60.55	60.55	60.55	60.55	60.55	60.55	60.55
coal	Vietnam	Asia	South-eastern Asia	Nghi Son power station	Phase 2 Unit 1			660	operating	2022		supercritical	bituminous					Nghi Son 2 Power [100%]	Korea Electric Power Corp [50.0%]; Marubeni Corp [40.0%]; Tohoku Electric Power Co Inc [10.0%]	19.3158	105.8	exact	Nghi Son Economic Zone	Hai Ha	Tinh Gia	Thanh Hoa	https://www.gem.wiki/Nghi_Son_power_station	L100000104345	G100000107412	KR7015760002	0.5	1320		2	2062	2102	2142	0	0	330	330	330	330	330	330	330	330	330	330
coal	Vietnam	Asia	South-eastern Asia	Nghi Son power station	Phase 2 Unit 2			660	operating	2022		supercritical	bituminous					Nghi Son 2 Power [100%]	Korea Electric Power Corp [50.0%]; Marubeni Corp [40.0%]; Tohoku Electric Power Co Inc [10.0%]	19.3158	105.8	exact	Nghi Son Economic Zone	Hai Ha	Tinh Gia	Thanh Hoa	https://www.gem.wiki/Nghi_Son_power_station	L100000104345	G100000107413	KR7015760002	0.5	1320	1320	2	2062	2102	2142	0	0	330	330	330	330	330	330	330	330	330	330
coal	China	Asia	Eastern Asia	Pingshuo Gangue power station	Unit 3	山西国际能源平朔煤矸石发电厂		300	operating	2009		subcritical	waste coal					Shanxi Pingshuo Gangue Power Generation [100%]	China Coal Pingshuo Coal Industry [33.0%]; Shanxi State-Owned Capital Investment and Operation Co Ltd [28.3%]; KEPCO Shanxi International [22.8%]; KEPCO Woori sprott Global Prive [5.4%]; Power Development [4.7%]; Shanxi Gemeng International Energy Group Co Ltd [3.1%]; other [2.7%]	39.4728	112.323	exact	Pinglu	Pinglu	Shuozhou	Shanxi	https://www.gem.wiki/Pingshuo_Gangue_power_station	L100000101501	G100000108005	KR7015760002	0.228	600		15	2049	2089	2129	68.4	68.4	68.4	68.4	68.4	68.4	68.4	68.4	68.4	68.4	68.4	68.4
coal	China	Asia	Eastern Asia	Pingshuo Gangue power station	Unit 4	山西国际能源平朔煤矸石发电厂		300	operating	2009		subcritical	waste coal					Shanxi Pingshuo Gangue Power Generation [100%]	China Coal Pingshuo Coal Industry [33.0%]; Shanxi State-Owned Capital Investment and Operation Co Ltd [28.3%]; KEPCO Shanxi International [22.8%]; KEPCO Woori sprott Global Prive [5.4%]; Power Development [4.7%]; Shanxi Gemeng International Energy Group Co Ltd [3.1%]; other [2.7%]	39.4728	112.323	exact	Pinglu	Pinglu	Shuozhou	Shanxi	https://www.gem.wiki/Pingshuo_Gangue_power_station	L100000101501	G100000108006	KR7015760002	0.228	600	600	15	2049	2089	2129	68.4	68.4	68.4	68.4	68.4	68.4	68.4	68.4	68.4	68.4	68.4	68.4
coal	South Korea	Asia	Eastern Asia	Samcheok Green power station	Unit 1	삼척그린파워	삼척그린파워	1022	operating	2016	2046	ultra-supercritical	unknown					Korea Southern Power [100%]	Korea Electric Power Corp [100.0%]	37.186	129.342	exact	Hosan	Wondeok	Samcheok	Gangwon	https://www.gem.wiki/Samcheok_Green_power_station	L100000103463	G100000108757	KR7015760002	1	2044		8	2056	2096	2136	1022	1022	1022	1022	1022	1022	1022	1022	1022	1022	1022	1022
coal	South Korea	Asia	Eastern Asia	Samcheok Green power station	Unit 2	삼척그린파워	삼척그린파워	1022	operating	2017	2047	ultra-supercritical	unknown					Korea Southern Power [100%]	Korea Electric Power Corp [100.0%]	37.186	129.342	exact	Hosan	Wondeok	Samcheok	Gangwon	https://www.gem.wiki/Samcheok_Green_power_station	L100000103463	G100000108758	KR7015760002	1	2044	2044	7	2057	2097	2137	1022	1022	1022	1022	1022	1022	1022	1022	1022	1022	1022	1022
coal	South Korea	Asia	Eastern Asia	Samchonpo power station	Unit 1	삼천포 발전소	Samcheonpo power station, 삼천포 발전소	560	retired	1983	2021	subcritical	bituminous					Korea South-East Power [100%]	Korea Electric Power Corp [100.0%]	34.9107	128.108	exact	Deokho	Hai	Goseong	South Gyeongsang	https://www.gem.wiki/Samchonpo_power_station	L100000103487	G100000108759	KR7015760002	1	5360		41	2023	2063	2103	560	0	0	0	0	0	0	0	0	0	0	0
coal	South Korea	Asia	Eastern Asia	Samchonpo power station	Unit 2	삼천포 발전소	Samcheonpo power station, 삼천포 발전소	560	retired	1984	2021	subcritical	bituminous					Korea South-East Power [100%]	Korea Electric Power Corp [100.0%]	34.9107	128.108	exact	Deokho	Hai	Goseong	South Gyeongsang	https://www.gem.wiki/Samchonpo_power_station	L100000103487	G100000108760	KR7015760002	1	5360		40	2024	2064	2104	560	0	0	0	0	0	0	0	0	0	0	0
coal	South Korea	Asia	Eastern Asia	Samchonpo power station	Unit 3	삼천포 발전소	Samcheonpo power station, 삼천포 발전소	560	operating	1993	2024	subcritical	bituminous					Korea South-East Power [100%]	Korea Electric Power Corp [100.0%]	34.9107	128.108	exact	Deokho	Hai	Goseong	South Gyeongsang	https://www.gem.wiki/Samchonpo_power_station	L100000103487	G100000108761	KR7015760002	1	5360		31	2033	2073	2113	560	560	560	560	0	0	0	0	0	0	0	0
coal	South Korea	Asia	Eastern Asia	Samchonpo power station	Unit 4	삼천포 발전소	Samcheonpo power station, 삼천포 발전소	560	operating	1994	2024	subcritical	bituminous					Korea South-East Power [100%]	Korea Electric Power Corp [100.0%]	34.9107	128.108	exact	Deokho	Hai	Goseong	South Gyeongsang	https://www.gem.wiki/Samchonpo_power_station	L100000103487	G100000108762	KR7015760002	1	5360		30	2034	2074	2114	560	560	560	560	0	0	0	0	0	0	0	0
coal	South Korea	Asia	Eastern Asia	Samchonpo power station	Unit 5	삼천포 발전소	Samcheonpo power station, 삼천포 발전소	500	operating	1997	2027	supercritical	subbituminous					Korea South-East Power [100%]	Korea Electric Power Corp [100.0%]	34.9107	128.108	exact	Deokho	Hai	Goseong	South Gyeongsang	https://www.gem.wiki/Samchonpo_power_station	L100000103487	G100000108763	KR7015760002	1	5360		27	2037	2077	2117	500	500	500	500	500	500	500	0	0	0	0	0
coal	South Korea	Asia	Eastern Asia	Samchonpo power station	Unit 6	삼천포 발전소	Samcheonpo power station, 삼천포 발전소	500	operating	1998	2028	supercritical	subbituminous					Korea South-East Power [100%]	Korea Electric Power Corp [100.0%]	34.9107	128.108	exact	Deokho	Hai	Goseong	South Gyeongsang	https://www.gem.wiki/Samchonpo_power_station	L100000103487	G100000108764	KR7015760002	1	5360	5360	26	2038	2078	2118	500	500	500	500	500	500	500	500	0	0	0	0
coal	China	Asia	Eastern Asia	Shanxi Hepo power station	Unit 5	山西国际能源河坡发电厂		350	operating	2016		supercritical	unknown					Shanxi Hepo Power Generation [100%]	Shanxi State-Owned Capital Investment and Operation Co Ltd [39.6%]; KEPCO Shanxi International [31.8%]; KEPCO Woori sprott Global Prive [7.5%]; Power Development [6.5%]; Yangquan Economic and Trade Asset Operation Center [6.5%]; Shanxi Gemeng International Energy Group Co Ltd [4.4%]; other [3.7%]	37.9199	113.615	exact	Yingying Town Xiayan Villege Baiquan Industrial Park	Jiaoqu	Yangquan	Shanxi	https://www.gem.wiki/Shanxi_Hepo_power_station	L100000101509	G100000109047	KR7015760002	0.318	700		8	2056	2096	2136	111.3	111.3	111.3	111.3	111.3	111.3	111.3	111.3	111.3	111.3	111.3	111.3
coal	China	Asia	Eastern Asia	Shanxi Hepo power station	Unit 6	山西国际能源河坡发电厂		350	operating	2016		supercritical	unknown					Shanxi Hepo Power Generation [100%]	Shanxi State-Owned Capital Investment and Operation Co Ltd [39.6%]; KEPCO Shanxi International [31.8%]; KEPCO Woori sprott Global Prive [7.5%]; Power Development [6.5%]; Yangquan Economic and Trade Asset Operation Center [6.5%]; Shanxi Gemeng International Energy Group Co Ltd [4.4%]; other [3.7%]	37.9199	113.615	exact	Yingying Town Xiayan Villege Baiquan Industrial Park	Jiaoqu	Yangquan	Shanxi	https://www.gem.wiki/Shanxi_Hepo_power_station	L100000101509	G100000109048	KR7015760002	0.318	700	700	8	2056	2096	2136	111.3	111.3	111.3	111.3	111.3	111.3	111.3	111.3	111.3	111.3	111.3	111.3
coal	China	Asia	Eastern Asia	Shanxi Liulin power station	Phase I Unit 1	山西国际能源柳林发电厂	Liulin Liansheng power station, Liulin Huaguang power station (Phase I Unit 1, Phase I Unit 2), Liulin Huaguang power station 柳林华光热电厂 (Phase II Unit 3, Phase II Unit 4)	100	operating	1995		subcritical	unknown					Shanxi Liulin Electric Power [100%]	Shanxi State-Owned Capital Investment and Operation Co Ltd [42.3%]; KEPCO Shanxi International [34.0%]; KEPCO Woori sprott Global Prive [8.0%]; Power Development [7.0%]; Shanxi Gemeng International Energy Group Co Ltd [4.7%]; other [4.0%]	37.4185	110.824	exact	Xuecun Town	Liulin	Lüliang	Shanxi	https://www.gem.wiki/Shanxi_Liulin_power_station	L100000105027	G100000106344	KR7015760002	0.34	1400		29	2035	2075	2115	34	34	34	34	34	34	34	34	34	34	34	34
coal	China	Asia	Eastern Asia	Shanxi Liulin power station	Phase I Unit 2	山西国际能源柳林发电厂	Liulin Liansheng power station, Liulin Huaguang power station (Phase I Unit 1, Phase I Unit 2), Liulin Huaguang power station 柳林华光热电厂 (Phase II Unit 3, Phase II Unit 4)	100	operating	1996		subcritical	unknown					Shanxi Liulin Electric Power [100%]	Shanxi State-Owned Capital Investment and Operation Co Ltd [42.3%]; KEPCO Shanxi International [34.0%]; KEPCO Woori sprott Global Prive [8.0%]; Power Development [7.0%]; Shanxi Gemeng International Energy Group Co Ltd [4.7%]; other [4.0%]	37.4185	110.824	exact	Xuecun Town	Liulin	Lüliang	Shanxi	https://www.gem.wiki/Shanxi_Liulin_power_station	L100000105027	G100000106345	KR7015760002	0.34	1400		28	2036	2076	2116	34	34	34	34	34	34	34	34	34	34	34	34
coal	China	Asia	Eastern Asia	Shanxi Liulin power station	Phase II Unit 3	山西国际能源柳林发电厂	Liulin Liansheng power station, Liulin Huaguang power station (Phase I Unit 1, Phase I Unit 2), Liulin Huaguang power station 柳林华光热电厂 (Phase II Unit 3, Phase II Unit 4)	600	operating	2008		subcritical	unknown					Shanxi Huaguang Power Generation [100%]	China Huaneng Group Co Ltd [40.0%]; Shanxi State-Owned Capital Investment and Operation Co Ltd [21.2%]; KEPCO Shanxi International [17.0%]; Shanxi Coking Coal Energy Group Co Ltd [10.0%]; KEPCO Woori sprott Global Prive [4.0%]; Power Development [3.5%]; Shanxi Gemeng International Energy Group Co Ltd [2.4%]; other [2.0%]	37.4185	110.824	exact	Xuecun Town	Liulin	Lüliang	Shanxi	https://www.gem.wiki/Shanxi_Liulin_power_station	L100000105027	G100000106346	KR7015760002	0.17	1400		16	2048	2088	2128	102	102	102	102	102	102	102	102	102	102	102	102
coal	China	Asia	Eastern Asia	Shanxi Liulin power station	Phase II Unit 4	山西国际能源柳林发电厂	Liulin Liansheng power station, Liulin Huaguang power station (Phase I Unit 1, Phase I Unit 2), Liulin Huaguang power station 柳林华光热电厂 (Phase II Unit 3, Phase II Unit 4)	600	operating	2008		subcritical	unknown					Shanxi Huaguang Power Generation [100%]	China Huaneng Group Co Ltd [40.0%]; Shanxi State-Owned Capital Investment and Operation Co Ltd [21.2%]; KEPCO Shanxi International [17.0%]; Shanxi Coking Coal Energy Group Co Ltd [10.0%]; KEPCO Woori sprott Global Prive [4.0%]; Power Development [3.5%]; Shanxi Gemeng International Energy Group Co Ltd [2.4%]; other [2.0%]	37.4185	110.824	exact	Xuecun Town	Liulin	Lüliang	Shanxi	https://www.gem.wiki/Shanxi_Liulin_power_station	L100000105027	G100000106347	KR7015760002	0.17	1400	1400	16	2048	2088	2128	102	102	102	102	102	102	102	102	102	102	102	102
coal	China	Asia	Eastern Asia	Shanxi Ruiguang power station	Phase I Unit 1	山西国际能源瑞光热电公司热电联产		330	operating	2011		subcritical	bituminous					Shanxi Ruiguang Power [100%]	Shanxi State-Owned Capital Investment and Operation Co Ltd [42.3%]; KEPCO Shanxi International [34.0%]; KEPCO Woori sprott Global Prive [8.0%]; Power Development [7.0%]; Shanxi Gemeng International Energy Group Co Ltd [4.7%]; other [4.0%]	37.7846	112.72	exact	Wujinshan	Yuci	Jinzhong	Shanxi	https://www.gem.wiki/Shanxi_Ruiguang_power_station	L100000101511	G100000109051	KR7015760002	0.34	660		13	2051	2091	2131	112.2	112.2	112.2	112.2	112.2	112.2	112.2	112.2	112.2	112.2	112.2	112.2
coal	China	Asia	Eastern Asia	Shanxi Ruiguang power station	Phase I Unit 2	山西国际能源瑞光热电公司热电联产		330	operating	2012		subcritical	bituminous					Shanxi Ruiguang Power [100%]	Shanxi State-Owned Capital Investment and Operation Co Ltd [42.3%]; KEPCO Shanxi International [34.0%]; KEPCO Woori sprott Global Prive [8.0%]; Power Development [7.0%]; Shanxi Gemeng International Energy Group Co Ltd [4.7%]; other [4.0%]	37.7846	112.72	exact	Wujinshan	Yuci	Jinzhong	Shanxi	https://www.gem.wiki/Shanxi_Ruiguang_power_station	L100000101511	G100000109052	KR7015760002	0.34	660	660	12	2052	2092	2132	112.2	112.2	112.2	112.2	112.2	112.2	112.2	112.2	112.2	112.2	112.2	112.2
coal	China	Asia	Eastern Asia	Shanxi Yuguang power station	Phase I Unit 1	山西山阴煤矸石发电	Shanxi Shanyin power station, 昱光（山阴）煤矸石综合利用发电项目一期 (Phase I Unit 1, Phase I Unit 2), 昱光（山阴）煤矸石综合利用发电项目二期 (Phase II Unit 3, Phase II Unit 4)	300	operating	2012		subcritical	waste coal					Shanxi Yuguang Power Generation [100%]	Shanxi State-Owned Capital Investment and Operation Co Ltd [25.4%]; China National Coal Group [24.0%]; KEPCO Shanxi International [20.4%]; Beijing Ward Financial Investment Holding Co Ltd [15.5%]; KEPCO Woori sprott Global Prive [4.8%]; Power Development [4.2%]; other [2.9%]; Shanxi Gemeng International Energy Group Co Ltd [2.8%]	39.6159	112.799	exact	Beizhouzhuang	Shanyin	Shuozhou	Shanxi	https://www.gem.wiki/Shanxi_Yuguang_power_station	L100000101514	G100000109057	KR7015760002	0.204	1300		12	2052	2092	2132	61.2	61.2	61.2	61.2	61.2	61.2	61.2	61.2	61.2	61.2	61.2	61.2
coal	China	Asia	Eastern Asia	Shanxi Yuguang power station	Phase I Unit 2	山西山阴煤矸石发电	Shanxi Shanyin power station, 昱光（山阴）煤矸石综合利用发电项目一期 (Phase I Unit 1, Phase I Unit 2), 昱光（山阴）煤矸石综合利用发电项目二期 (Phase II Unit 3, Phase II Unit 4)	300	operating	2012		subcritical	waste coal					Shanxi Yuguang Power Generation [100%]	Shanxi State-Owned Capital Investment and Operation Co Ltd [25.4%]; China National Coal Group [24.0%]; KEPCO Shanxi International [20.4%]; Beijing Ward Financial Investment Holding Co Ltd [15.5%]; KEPCO Woori sprott Global Prive [4.8%]; Power Development [4.2%]; other [2.9%]; Shanxi Gemeng International Energy Group Co Ltd [2.8%]	39.6159	112.799	exact	Beizhouzhuang	Shanyin	Shuozhou	Shanxi	https://www.gem.wiki/Shanxi_Yuguang_power_station	L100000101514	G100000109058	KR7015760002	0.204	1300		12	2052	2092	2132	61.2	61.2	61.2	61.2	61.2	61.2	61.2	61.2	61.2	61.2	61.2	61.2
coal	China	Asia	Eastern Asia	Shanxi Yuguang power station	Phase II Unit 3	山西山阴煤矸石发电	Shanxi Shanyin power station, 昱光（山阴）煤矸石综合利用发电项目一期 (Phase I Unit 1, Phase I Unit 2), 昱光（山阴）煤矸石综合利用发电项目二期 (Phase II Unit 3, Phase II Unit 4)	350	operating	2019		supercritical	waste coal					Shanxi Yuguang Power Generation [100%]	Shanxi State-Owned Capital Investment and Operation Co Ltd [25.4%]; China National Coal Group [24.0%]; KEPCO Shanxi International [20.4%]; Beijing Ward Financial Investment Holding Co Ltd [15.5%]; KEPCO Woori sprott Global Prive [4.8%]; Power Development [4.2%]; other [2.9%]; Shanxi Gemeng International Energy Group Co Ltd [2.8%]	39.6159	112.799	exact	Beizhouzhuang	Shanyin	Shuozhou	Shanxi	https://www.gem.wiki/Shanxi_Yuguang_power_station	L100000101514	G100000109059	KR7015760002	0.204	1300		5	2059	2099	2139	71.4	71.4	71.4	71.4	71.4	71.4	71.4	71.4	71.4	71.4	71.4	71.4
coal	China	Asia	Eastern Asia	Shanxi Yuguang power station	Phase II Unit 4	山西山阴煤矸石发电	Shanxi Shanyin power station, 昱光（山阴）煤矸石综合利用发电项目一期 (Phase I Unit 1, Phase I Unit 2), 昱光（山阴）煤矸石综合利用发电项目二期 (Phase II Unit 3, Phase II Unit 4)	350	operating	2019		supercritical	waste coal					Shanxi Yuguang Power Generation [100%]	Shanxi State-Owned Capital Investment and Operation Co Ltd [25.4%]; China National Coal Group [24.0%]; KEPCO Shanxi International [20.4%]; Beijing Ward Financial Investment Holding Co Ltd [15.5%]; KEPCO Woori sprott Global Prive [4.8%]; Power Development [4.2%]; other [2.9%]; Shanxi Gemeng International Energy Group Co Ltd [2.8%]	39.6159	112.799	exact	Beizhouzhuang	Shanyin	Shuozhou	Shanxi	https://www.gem.wiki/Shanxi_Yuguang_power_station	L100000101514	G100000109060	KR7015760002	0.204	1300	1300	5	2059	2099	2139	71.4	71.4	71.4	71.4	71.4	71.4	71.4	71.4	71.4	71.4	71.4	71.4
coal	China	Asia	Eastern Asia	Shanxi Zhaoguang power station	Unit 1	山西国际能源兆光发电厂		300	operating	2005		subcritical	bituminous					Shanxi Zhaoguang Power Generation [100%]	Shanxi State-Owned Capital Investment and Operation Co Ltd [42.3%]; KEPCO Shanxi International [34.0%]; KEPCO Woori sprott Global Prive [8.0%]; Power Development [7.0%]; Shanxi Gemeng International Energy Group Co Ltd [4.7%]; other [4.0%]	36.5538	111.692	exact	Bailong	Huozhou	Linfen	Shanxi	https://www.gem.wiki/Shanxi_Zhaoguang_power_station	L100000101515	G100000109061	KR7015760002	0.34	1800		19	2045	2085	2125	102	102	102	102	102	102	102	102	102	102	102	102
coal	China	Asia	Eastern Asia	Shanxi Zhaoguang power station	Unit 2	山西国际能源兆光发电厂		300	operating	2005		subcritical	bituminous					Shanxi Zhaoguang Power Generation [100%]	Shanxi State-Owned Capital Investment and Operation Co Ltd [42.3%]; KEPCO Shanxi International [34.0%]; KEPCO Woori sprott Global Prive [8.0%]; Power Development [7.0%]; Shanxi Gemeng International Energy Group Co Ltd [4.7%]; other [4.0%]	36.5538	111.692	exact	Bailong	Huozhou	Linfen	Shanxi	https://www.gem.wiki/Shanxi_Zhaoguang_power_station	L100000101515	G100000109062	KR7015760002	0.34	1800		19	2045	2085	2125	102	102	102	102	102	102	102	102	102	102	102	102
coal	China	Asia	Eastern Asia	Shanxi Zhaoguang power station	Unit 3	山西国际能源兆光发电厂		600	operating	2009		supercritical	bituminous					Shanxi Zhaoguang Power Generation [100%]	Shanxi State-Owned Capital Investment and Operation Co Ltd [42.3%]; KEPCO Shanxi International [34.0%]; KEPCO Woori sprott Global Prive [8.0%]; Power Development [7.0%]; Shanxi Gemeng International Energy Group Co Ltd [4.7%]; other [4.0%]	36.5538	111.692	exact	Bailong	Huozhou	Linfen	Shanxi	https://www.gem.wiki/Shanxi_Zhaoguang_power_station	L100000101515	G100000109063	KR7015760002	0.34	1800		15	2049	2089	2129	204	204	204	204	204	204	204	204	204	204	204	204
coal	China	Asia	Eastern Asia	Shanxi Zhaoguang power station	Unit 4	山西国际能源兆光发电厂		600	operating	2009		supercritical	bituminous					Shanxi Zhaoguang Power Generation [100%]	Shanxi State-Owned Capital Investment and Operation Co Ltd [42.3%]; KEPCO Shanxi International [34.0%]; KEPCO Woori sprott Global Prive [8.0%]; Power Development [7.0%]; Shanxi Gemeng International Energy Group Co Ltd [4.7%]; other [4.0%]	36.5538	111.692	exact	Bailong	Huozhou	Linfen	Shanxi	https://www.gem.wiki/Shanxi_Zhaoguang_power_station	L100000101515	G100000109064	KR7015760002	0.34	1800	1800	15	2049	2089	2129	204	204	204	204	204	204	204	204	204	204	204	204
coal	South Korea	Asia	Eastern Asia	Shin Boryeong power station	Unit 1	신보령화력	Sin Boryeong power station, Shin Poryong power station, f	1000	operating	2017	2047	ultra-supercritical	bituminous					Korea Midland Power [100%]	Korea Electric Power Corp [100.0%]	36.3846	126.486	exact	Poryong-gun	Ocheon	Poryong	South Chungcheong	https://www.gem.wiki/Shin_Boryeong_power_station	L100000103482	G100000109277	KR7015760002	1	2000		7	2057	2097	2137	1000	1000	1000	1000	1000	1000	1000	1000	1000	1000	1000	1000
coal	South Korea	Asia	Eastern Asia	Shin Boryeong power station	Unit 2	신보령화력	Sin Boryeong power station, Shin Poryong power station, f	1000	operating	2017	2047	ultra-supercritical	bituminous					Korea Midland Power [100%]	Korea Electric Power Corp [100.0%]	36.3846	126.486	exact	Poryong-gun	Ocheon	Poryong	South Chungcheong	https://www.gem.wiki/Shin_Boryeong_power_station	L100000103482	G100000109269	KR7015760002	1	2000	2000	7	2057	2097	2137	1000	1000	1000	1000	1000	1000	1000	1000	1000	1000	1000	1000
coal	South Korea	Asia	Eastern Asia	Shin Seocheon power station	--	신서천 발전소	Sin Seocheon power station, New Seocheon power station, 신서천 발전소	1018	operating	2021		ultra-supercritical	bituminous					Korea Midland Power [100%]	Korea Electric Power Corp [100.0%]	36.1441	126.496	exact	Maryang-ri	Seocheon		South Chungcheong	https://www.gem.wiki/Shin_Seocheon_power_station	L100000104888	G100000108918	KR7015760002	1	1018	1018	3	2061	2101	2141	0	1018	1018	1018	1018	1018	1018	1018	1018	1018	1018	1018
coal	Indonesia	Asia	South-eastern Asia	Tabalong power station	Unit 1		Kalsel FTP2	100	operating	2019		subcritical	lignite					PT Tanjung Power Indonesia [100%]	PT Adaro Power [65.0%]; Korea Electric Power Corp [35.0%]	-2.16343	115.441	exact	Adaro's Tanjung coal mine		Tabalong	South Kalimantan	https://www.gem.wiki/Tabalong_power_station	L100000102785	G100000109790	KR7015760002	0.35	200		5	2059	2099	2139	35	35	35	35	35	35	35	35	35	35	35	35
coal	Indonesia	Asia	South-eastern Asia	Tabalong power station	Unit 2		Kalsel FTP2	100	operating	2019		subcritical	lignite					PT Tanjung Power Indonesia [100%]	PT Adaro Power [65.0%]; Korea Electric Power Corp [35.0%]	-2.16343	115.441	exact	Adaro's Tanjung coal mine		Tabalong	South Kalimantan	https://www.gem.wiki/Tabalong_power_station	L100000102785	G100000109791	KR7015760002	0.35	200	200	5	2059	2099	2139	35	35	35	35	35	35	35	35	35	35	35	35
coal	South Korea	Asia	Eastern Asia	Taean power station	Unit 1	태안화력	태안화력	500	operating	1995	2025	supercritical	bituminous					Korea Western Power [100%]	Korea Electric Power Corp [100.0%]	36.9033	126.234	exact	Banggal	Wonbuk	Taean	South Chungcheong	https://www.gem.wiki/Taean_power_station	L100000103483	G100000109801	KR7015760002	1	9446		29	2035	2075	2115	500	500	500	500	500	0	0	0	0	0	0	0
coal	South Korea	Asia	Eastern Asia	Taean power station	Unit 2	태안화력	태안화력	500	operating	1996	2025	supercritical	bituminous					Korea Western Power [100%]	Korea Electric Power Corp [100.0%]	36.9033	126.234	exact	Banggal	Wonbuk	Taean	South Chungcheong	https://www.gem.wiki/Taean_power_station	L100000103483	G100000109803	KR7015760002	1	9446		28	2036	2076	2116	500	500	500	500	500	0	0	0	0	0	0	0
coal	South Korea	Asia	Eastern Asia	Taean power station	Unit 3	태안화력	태안화력	500	operating	1997	2028	supercritical	bituminous					Korea Western Power [100%]	Korea Electric Power Corp [100.0%]	36.9033	126.234	exact	Banggal	Wonbuk	Taean	South Chungcheong	https://www.gem.wiki/Taean_power_station	L100000103483	G100000109804	KR7015760002	1	9446		27	2037	2077	2117	500	500	500	500	500	500	500	500	0	0	0	0
coal	South Korea	Asia	Eastern Asia	Taean power station	Unit 4	태안화력	태안화력	500	operating	1997	2029	supercritical	bituminous					Korea Western Power [100%]	Korea Electric Power Corp [100.0%]	36.9033	126.234	exact	Banggal	Wonbuk	Taean	South Chungcheong	https://www.gem.wiki/Taean_power_station	L100000103483	G100000109805	KR7015760002	1	9446		27	2037	2077	2117	500	500	500	500	500	500	500	500	500	0	0	0
coal	South Korea	Asia	Eastern Asia	Taean power station	Unit 5	태안화력	태안화력	500	operating	2001	2032	supercritical	bituminous					Korea Western Power [100%]	Korea Electric Power Corp [100.0%]	36.9033	126.234	exact	Banggal	Wonbuk	Taean	South Chungcheong	https://www.gem.wiki/Taean_power_station	L100000103483	G100000109806	KR7015760002	1	9446		23	2041	2081	2121	500	500	500	500	500	500	500	500	500	500	500	500
coal	South Korea	Asia	Eastern Asia	Taean power station	Unit 6	태안화력	태안화력	500	operating	2002	2032	supercritical	bituminous					Korea Western Power [100%]	Korea Electric Power Corp [100.0%]	36.9033	126.234	exact	Banggal	Wonbuk	Taean	South Chungcheong	https://www.gem.wiki/Taean_power_station	L100000103483	G100000109807	KR7015760002	1	9446		22	2042	2082	2122	500	500	500	500	500	500	500	500	500	500	500	500
coal	South Korea	Asia	Eastern Asia	Taean power station	Unit 7	태안화력	태안화력	500	operating	2007	2037	ultra-supercritical	bituminous					Korea Western Power [100%]	Korea Electric Power Corp [100.0%]	36.9033	126.234	exact	Banggal	Wonbuk	Taean	South Chungcheong	https://www.gem.wiki/Taean_power_station	L100000103483	G100000109808	KR7015760002	1	9446		17	2047	2087	2127	500	500	500	500	500	500	500	500	500	500	500	500
coal	South Korea	Asia	Eastern Asia	Taean power station	Unit 8	태안화력	태안화력	500	operating	2007	2037	ultra-supercritical	bituminous					Korea Western Power [100%]	Korea Electric Power Corp [100.0%]	36.9033	126.234	exact	Banggal	Wonbuk	Taean	South Chungcheong	https://www.gem.wiki/Taean_power_station	L100000103483	G100000109809	KR7015760002	1	9446		17	2047	2087	2127	500	500	500	500	500	500	500	500	500	500	500	500
coal	South Korea	Asia	Eastern Asia	Taean power station	Unit 9	태안화력	태안화력	1050	operating	2016	2046	ultra-supercritical	bituminous					Korea Western Power [100%]	Korea Electric Power Corp [100.0%]	36.9056	126.235	exact	Banggal	Wonbuk	Taean	South Chungcheong	https://www.gem.wiki/Taean_power_station	L100000103483	G100000109810	KR7015760002	1	9446		8	2056	2096	2136	1050	1050	1050	1050	1050	1050	1050	1050	1050	1050	1050	1050
coal	South Korea	Asia	Eastern Asia	Taean power station	IGCC Project	태안화력	태안화력	346	operating	2016		IGCC	unknown					Korea Western Power [100%]	Korea Electric Power Corp [100.0%]	36.9056	126.235	exact	Banggal	Wonbuk	Taean	South Chungcheong	https://www.gem.wiki/Taean_power_station	L100000103483	G100000109800	KR7015760002	1	9446		8	2056	2096	2136	346	346	346	346	346	346	346	346	346	346	346	346
coal	South Korea	Asia	Eastern Asia	Taean power station	Unit 10	태안화력	태안화력	1050	operating	2017	2047	ultra-supercritical	bituminous					Korea Western Power [100%]	Korea Electric Power Corp [100.0%]	36.9056	126.235	exact	Banggal	Wonbuk	Taean	South Chungcheong	https://www.gem.wiki/Taean_power_station	L100000103483	G100000109802	KR7015760002	1	9446	9446	7	2057	2097	2137	1050	1050	1050	1050	1050	1050	1050	1050	1050	1050	1050	1050
coal	China	Asia	Eastern Asia	Yangcheng power station	Phase I Unit 1	山西阳城发电厂	大唐阳城电厂	350	operating	2001		subcritical	anthracite					Yangcheng International Power Generating [100%]	China Datang Corp [38.7%]; Jiangsu Guoxin Investment Group Ltd [26.7%]; Shanxi State-Owned Capital Investment and Operation Co Ltd [9.0%]; KEPCO Shanxi International [7.3%]; China Energy Construction Group Co Ltd [6.7%]; Power Construction Corporation of China [6.7%]; KEPCO Woori sprott Global Prive [1.7%]; Power Development [1.5%]; Shanxi Gemeng International Energy Group Co Ltd [1.0%]; other [0…	35.4661	112.574	exact	Beiliu	Yangcheng	Jincheng	Shanxi	https://www.gem.wiki/Yangcheng_power_station	L100000101543	G100000111277	KR7015760002	0.073	5300		23	2041	2081	2121	25.55	25.55	25.55	25.55	25.55	25.55	25.55	25.55	25.55	25.55	25.55	25.55
coal	China	Asia	Eastern Asia	Yangcheng power station	Phase I Unit 2	山西阳城发电厂	大唐阳城电厂	350	operating	2001		subcritical	anthracite					Yangcheng International Power Generating [100%]	China Datang Corp [38.7%]; Jiangsu Guoxin Investment Group Ltd [26.7%]; Shanxi State-Owned Capital Investment and Operation Co Ltd [9.0%]; KEPCO Shanxi International [7.3%]; China Energy Construction Group Co Ltd [6.7%]; Power Construction Corporation of China [6.7%]; KEPCO Woori sprott Global Prive [1.7%]; Power Development [1.5%]; Shanxi Gemeng International Energy Group Co Ltd [1.0%]; other [0…	35.4661	112.574	exact	Beiliu	Yangcheng	Jincheng	Shanxi	https://www.gem.wiki/Yangcheng_power_station	L100000101543	G100000111278	KR7015760002	0.073	5300		23	2041	2081	2121	25.55	25.55	25.55	25.55	25.55	25.55	25.55	25.55	25.55	25.55	25.55	25.55
coal	China	Asia	Eastern Asia	Yangcheng power station	Phase I Unit 3	山西阳城发电厂	大唐阳城电厂	350	operating	2001		subcritical	anthracite					Yangcheng International Power Generating [100%]	China Datang Corp [38.7%]; Jiangsu Guoxin Investment Group Ltd [26.7%]; Shanxi State-Owned Capital Investment and Operation Co Ltd [9.0%]; KEPCO Shanxi International [7.3%]; China Energy Construction Group Co Ltd [6.7%]; Power Construction Corporation of China [6.7%]; KEPCO Woori sprott Global Prive [1.7%]; Power Development [1.5%]; Shanxi Gemeng International Energy Group Co Ltd [1.0%]; other [0…	35.4661	112.574	exact	Beiliu	Yangcheng	Jincheng	Shanxi	https://www.gem.wiki/Yangcheng_power_station	L100000101543	G100000111279	KR7015760002	0.073	5300		23	2041	2081	2121	25.55	25.55	25.55	25.55	25.55	25.55	25.55	25.55	25.55	25.55	25.55	25.55
coal	China	Asia	Eastern Asia	Yangcheng power station	Phase I Unit 4	山西阳城发电厂	大唐阳城电厂	350	operating	2002		subcritical	anthracite					Yangcheng International Power Generating [100%]	China Datang Corp [38.7%]; Jiangsu Guoxin Investment Group Ltd [26.7%]; Shanxi State-Owned Capital Investment and Operation Co Ltd [9.0%]; KEPCO Shanxi International [7.3%]; China Energy Construction Group Co Ltd [6.7%]; Power Construction Corporation of China [6.7%]; KEPCO Woori sprott Global Prive [1.7%]; Power Development [1.5%]; Shanxi Gemeng International Energy Group Co Ltd [1.0%]; other [0…	35.4661	112.574	exact	Beiliu	Yangcheng	Jincheng	Shanxi	https://www.gem.wiki/Yangcheng_power_station	L100000101543	G100000111280	KR7015760002	0.073	5300		22	2042	2082	2122	25.55	25.55	25.55	25.55	25.55	25.55	25.55	25.55	25.55	25.55	25.55	25.55
coal	China	Asia	Eastern Asia	Yangcheng power station	Phase I Unit 5	山西阳城发电厂	大唐阳城电厂	350	operating	2002		subcritical	anthracite					Yangcheng International Power Generating [100%]	China Datang Corp [38.7%]; Jiangsu Guoxin Investment Group Ltd [26.7%]; Shanxi State-Owned Capital Investment and Operation Co Ltd [9.0%]; KEPCO Shanxi International [7.3%]; China Energy Construction Group Co Ltd [6.7%]; Power Construction Corporation of China [6.7%]; KEPCO Woori sprott Global Prive [1.7%]; Power Development [1.5%]; Shanxi Gemeng International Energy Group Co Ltd [1.0%]; other [0…	35.4661	112.574	exact	Beiliu	Yangcheng	Jincheng	Shanxi	https://www.gem.wiki/Yangcheng_power_station	L100000101543	G100000111281	KR7015760002	0.073	5300		22	2042	2082	2122	25.55	25.55	25.55	25.55	25.55	25.55	25.55	25.55	25.55	25.55	25.55	25.55
coal	China	Asia	Eastern Asia	Yangcheng power station	Phase I Unit 6	山西阳城发电厂	大唐阳城电厂	350	operating	2002		subcritical	anthracite					Yangcheng International Power Generating [100%]	China Datang Corp [38.7%]; Jiangsu Guoxin Investment Group Ltd [26.7%]; Shanxi State-Owned Capital Investment and Operation Co Ltd [9.0%]; KEPCO Shanxi International [7.3%]; China Energy Construction Group Co Ltd [6.7%]; Power Construction Corporation of China [6.7%]; KEPCO Woori sprott Global Prive [1.7%]; Power Development [1.5%]; Shanxi Gemeng International Energy Group Co Ltd [1.0%]; other [0…	35.4661	112.574	exact	Beiliu	Yangcheng	Jincheng	Shanxi	https://www.gem.wiki/Yangcheng_power_station	L100000101543	G100000111282	KR7015760002	0.073	5300		22	2042	2082	2122	25.55	25.55	25.55	25.55	25.55	25.55	25.55	25.55	25.55	25.55	25.55	25.55
coal	China	Asia	Eastern Asia	Yangcheng power station	Phase II Unit 7	山西阳城发电厂	大唐阳城电厂	600	operating	2007		subcritical	anthracite					Datang Yangcheng Power Generation [100%]	China Datang Corp [41.0%]; Jiangsu Guoxin Investment Group Ltd [30.0%]; Shanxi State-Owned Capital Investment and Operation Co Ltd [12.3%]; KEPCO Shanxi International [9.9%]; KEPCO Woori sprott Global Prive [2.3%]; Power Development [2.0%]; Shanxi Gemeng International Energy Group Co Ltd [1.4%]; other [1.2%]	35.4661	112.574	exact	Beiliu	Yangcheng	Jincheng	Shanxi	https://www.gem.wiki/Yangcheng_power_station	L100000101543	G100000111283	KR7015760002	0.099	5300		17	2047	2087	2127	59.4	59.4	59.4	59.4	59.4	59.4	59.4	59.4	59.4	59.4	59.4	59.4
coal	China	Asia	Eastern Asia	Yangcheng power station	Phase II Unit 8	山西阳城发电厂	大唐阳城电厂	600	operating	2007		subcritical	anthracite					Datang Yangcheng Power Generation [100%]	China Datang Corp [41.0%]; Jiangsu Guoxin Investment Group Ltd [30.0%]; Shanxi State-Owned Capital Investment and Operation Co Ltd [12.3%]; KEPCO Shanxi International [9.9%]; KEPCO Woori sprott Global Prive [2.3%]; Power Development [2.0%]; Shanxi Gemeng International Energy Group Co Ltd [1.4%]; other [1.2%]	35.4661	112.574	exact	Beiliu	Yangcheng	Jincheng	Shanxi	https://www.gem.wiki/Yangcheng_power_station	L100000101543	G100000111284	KR7015760002	0.099	5300		17	2047	2087	2127	59.4	59.4	59.4	59.4	59.4	59.4	59.4	59.4	59.4	59.4	59.4	59.4
coal	China	Asia	Eastern Asia	Yangcheng power station	Phase III Unit 10	山西阳城发电厂	大唐阳城电厂	1000	announced			ultra-supercritical	anthracite					Yangcheng International Power Generating	China Datang Corp; China Energy Construction Group Co Ltd; Jiangsu Guoxin Investment Group Ltd; KEPCO Shanxi International; KEPCO Woori sprott Global Prive; other; Power Construction Corporation of China; Power Development; Shanxi Gemeng International Energy Group Co Ltd; Shanxi State-Owned Capital Investment and Operation Co Ltd	35.4661	112.574	exact	Beiliu	Yangcheng	Jincheng	Shanxi	https://www.gem.wiki/Yangcheng_power_station	L100000101543	G100001000273	KR7015760002	0.1	5300		-99	40	80	120	0	0	0	0	0	0	0	0	0	100	100	100
coal	China	Asia	Eastern Asia	Yangcheng power station	Phase III Unit 9	山西阳城发电厂	大唐阳城电厂	1000	announced			ultra-supercritical	anthracite					Yangcheng International Power Generating	China Datang Corp; China Energy Construction Group Co Ltd; Jiangsu Guoxin Investment Group Ltd; KEPCO Shanxi International; KEPCO Woori sprott Global Prive; other; Power Construction Corporation of China; Power Development; Shanxi Gemeng International Energy Group Co Ltd; Shanxi State-Owned Capital Investment and Operation Co Ltd	35.4661	112.574	exact	Beiliu	Yangcheng	Jincheng	Shanxi	https://www.gem.wiki/Yangcheng_power_station	L100000101543	G100001000272	KR7015760002	0.1	5300	5300	-99	40	80	120	0	0	0	0	0	0	0	0	0	100	100	100
coal	South Korea	Asia	Eastern Asia	Yeongheung power station	Unit 1	영흥 발전소	Yonghungdo power station, 영흥 발전소	800	operating	2004	2034	supercritical	bituminous					Korea South-East Power [100%]	Korea Electric Power Corp [100.0%]	37.2365	126.438	exact	Oe	Yeongheung	Ongjin	Incheon	https://www.gem.wiki/Yeongheung_power_station	L100000103466	G100000111357	KR7015760002	1	6680		20	2044	2084	2124	800	800	800	800	800	800	800	800	800	800	800	800
coal	South Korea	Asia	Eastern Asia	Yeongheung power station	Unit 2	영흥 발전소	Yonghungdo power station, 영흥 발전소	800	operating	2004	2034	supercritical	bituminous					Korea South-East Power [100%]	Korea Electric Power Corp [100.0%]	37.2365	126.438	exact	Oe	Yeongheung	Ongjin	Incheon	https://www.gem.wiki/Yeongheung_power_station	L100000103466	G100000111358	KR7015760002	1	6680		20	2044	2084	2124	800	800	800	800	800	800	800	800	800	800	800	800
coal	South Korea	Asia	Eastern Asia	Yeongheung power station	Unit 3	영흥 발전소	Yonghungdo power station, 영흥 발전소	870	operating	2009	2038	ultra-supercritical	bituminous					Korea South-East Power [100%]	Korea Electric Power Corp [100.0%]	37.2365	126.438	exact	Oe	Yeongheung	Ongjin	Incheon	https://www.gem.wiki/Yeongheung_power_station	L100000103466	G100000111359	KR7015760002	1	6680		15	2049	2089	2129	870	870	870	870	870	870	870	870	870	870	870	870
coal	South Korea	Asia	Eastern Asia	Yeongheung power station	Unit 4	영흥 발전소	Yonghungdo power station, 영흥 발전소	870	operating	2009	2038	ultra-supercritical	bituminous					Korea South-East Power [100%]	Korea Electric Power Corp [100.0%]	37.2365	126.438	exact	Oe	Yeongheung	Ongjin	Incheon	https://www.gem.wiki/Yeongheung_power_station	L100000103466	G100000111360	KR7015760002	1	6680		15	2049	2089	2129	870	870	870	870	870	870	870	870	870	870	870	870
coal	South Korea	Asia	Eastern Asia	Yeongheung power station	Unit 5	영흥 발전소	Yonghungdo power station, 영흥 발전소	870	operating	2014	2044	supercritical	bituminous					Korea South-East Power [100%]	Korea Electric Power Corp [100.0%]	37.2369	126.436	exact	Oe	Yeongheung	Ongjin	Incheon	https://www.gem.wiki/Yeongheung_power_station	L100000103466	G100000111361	KR7015760002	1	6680		10	2054	2094	2134	870	870	870	870	870	870	870	870	870	870	870	870
coal	South Korea	Asia	Eastern Asia	Yeongheung power station	Unit 6	영흥 발전소	Yonghungdo power station, 영흥 발전소	870	operating	2014	2044	supercritical	bituminous					Korea South-East Power [100%]	Korea Electric Power Corp [100.0%]	37.2369	126.436	exact	Oe	Yeongheung	Ongjin	Incheon	https://www.gem.wiki/Yeongheung_power_station	L100000103466	G100000111362	KR7015760002	1	6680	6680	10	2054	2094	2134	870	870	870	870	870	870	870	870	870	870	870	870
coal	South Korea	Asia	Eastern Asia	Yeosu power station	Unit 2 rebuild	여수 발전소	Yosu power station, 여수 발전소	329	operating	2011	2041	subcritical	bituminous					Korea South-East Power [100%]	Korea Electric Power Corp [100.0%]	34.8393	127.691	exact		Jungheung	Yeosu	North Jeolla	https://www.gem.wiki/Yeosu_power_station	L100000103476	G100000111368	KR7015760002	1	679		13	2051	2091	2131	329	329	329	329	329	329	329	329	329	329	329	329
coal	South Korea	Asia	Eastern Asia	Yeosu power station	Unit 1 rebuild	여수 발전소	Yosu power station, 여수 발전소	350	operating	2016	2046	unknown	bituminous					Korea South-East Power [100%]	Korea Electric Power Corp [100.0%]	34.8393	127.691	exact		Jungheung	Yeosu	North Jeolla	https://www.gem.wiki/Yeosu_power_station	L100000103476	G100000111367	KR7015760002	1	679	679	8	2056	2096	2136	350	350	350	350	350	350	350	350	350	350	350	350
coal	China	Asia	Eastern Asia	Youyu power station	Unit 1	京能京玉发电厂	京能右玉发电厂一期	330	operating	2011		subcritical	unknown					Shanxi Jingyu Power Generation [100%]	Beijing Jingneng Power Co Ltd [51.0%]; Shanxi State-Owned Capital Investment and Operation Co Ltd [20.7%]; KEPCO Shanxi International [16.7%]; KEPCO Woori sprott Global Prive [3.9%]; Power Development [3.4%]; Shanxi Gemeng International Energy Group Co Ltd [2.3%]; other [2.0%]	39.8661	112.512	exact	Baitouli Town Yejia Villege	Youyu	Shuozhou	Shanxi	https://www.gem.wiki/Youyu_power_station	L100000101548	G100000111447	KR7015760002	0.167	660		13	2051	2091	2131	55.11	55.11	55.11	55.11	55.11	55.11	55.11	55.11	55.11	55.11	55.11	55.11
coal	China	Asia	Eastern Asia	Youyu power station	Unit 2	京能京玉发电厂	京能右玉发电厂一期	330	operating	2012		subcritical	unknown					Shanxi Jingyu Power Generation [100%]	Beijing Jingneng Power Co Ltd [51.0%]; Shanxi State-Owned Capital Investment and Operation Co Ltd [20.7%]; KEPCO Shanxi International [16.7%]; KEPCO Woori sprott Global Prive [3.9%]; Power Development [3.4%]; Shanxi Gemeng International Energy Group Co Ltd [2.3%]; other [2.0%]	39.8661	112.512	exact	Baitouli Town Yejia Villege	Youyu	Shuozhou	Shanxi	https://www.gem.wiki/Youyu_power_station	L100000101548	G100000111448	KR7015760002	0.167	660	660	12	2052	2092	2132	55.11	55.11	55.11	55.11	55.11	55.11	55.11	55.11	55.11	55.11	55.11	55.11
coal	China	Asia	Eastern Asia	Yuguang Coal power station	Unit 1	山西国际能源裕光煤电盂县电厂		1000	operating	2021		ultra-supercritical	unknown					Shanxi International Energy Yuguang Coal Power [100%]	Beijing State-owned Capital Management Center [24.0%]; Shanxi State-Owned Capital Investment and Operation Co Ltd [21.6%]; Hebei Construction Investment Energy Investment Co Ltd [20.0%]; KEPCO Shanxi International [17.3%]; Yuxian State Owned Capital Operation Co Ltd [4.5%]; KEPCO Woori sprott Global Prive [4.1%]; Power Development [3.6%]; Shanxi Gemeng International Energy Group Co Ltd [2.4%]; ot…	38.0781	113.483	exact	Niucun Town	Yu	Yangquan	Shanxi	https://www.gem.wiki/Yuguang_Coal_power_station	L100000101551	G100000111465	KR7015760002	0.173	2000		3	2061	2101	2141	0	173	173	173	173	173	173	173	173	173	173	173
coal	China	Asia	Eastern Asia	Yuguang Coal power station	Unit 2	山西国际能源裕光煤电盂县电厂		1000	operating	2021		ultra-supercritical	unknown					Shanxi International Energy Yuguang Coal Power [100%]	Beijing State-owned Capital Management Center [24.0%]; Shanxi State-Owned Capital Investment and Operation Co Ltd [21.6%]; Hebei Construction Investment Energy Investment Co Ltd [20.0%]; KEPCO Shanxi International [17.3%]; Yuxian State Owned Capital Operation Co Ltd [4.5%]; KEPCO Woori sprott Global Prive [4.1%]; Power Development [3.6%]; Shanxi Gemeng International Energy Group Co Ltd [2.4%]; ot…	38.0781	113.483	exact	Niucun Town	Yu	Yangquan	Shanxi	https://www.gem.wiki/Yuguang_Coal_power_station	L100000101551	G100000111466	KR7015760002	0.173	2000	2000	3	2061	2101	2141	0	173	173	173	173	173	173	173	173	173	173	173
oil/gas	Jordan	Asia	Western Asia	Al Qatrana power plant	1	محطة القطرانة الكهربائية	Al Qatrana CCGT Power Plant Jordan	373	operating	2012		CC	NG/D					Qatrana Electric Power Company PSC [100.0%]	Korea Electric Power Corp [80.0%]; XENEL Industries Ltd [20.0%]	31.2226	36.0197	exact	Qatraneh			Karak	https://www.gem.wiki/Al_Qatrana_power_plant	L100000405486	G100000404602	KR7015760002	0.8	373	373	12	2052	2092	2132	298.4	298.4	298.4	298.4	298.4	298.4	298.4	298.4	298.4	298.4	298.4	298.4
oil/gas	South Korea	Asia	Eastern Asia	Andong power station	1	안동C/C		417	operating	2014		CC	LNG					Korea Southern Power Co Ltd [100.0%]	Korea Electric Power Corp [100.0%]	36.5959	128.541	exact	Andong			Gyeongsangbuk-do	https://www.gem.wiki/Andong_power_station	L100000401350	G100000401351	KR7015760002	1	417	417	10	2054	2094	2134	417	417	417	417	417	417	417	417	417	417	417	417
oil/gas	South Korea	Asia	Eastern Asia	Ansan power station	1	안산C/C		834	operating	2014		CC	LNG					S-Power [100.0%]	Korea Electric Power Corp; POSCO Holdings Inc; Samchully Co Ltd	37.2952	126.779	exact	Ansan-si			Gyeonggi-do	https://www.gem.wiki/Ansan_power_station	L100000401351	G100000401352	KR7015760002	0.333333	834	834	10	2054	2094	2134	278	278	278	278	278	278	278	278	278	278	278	278
oil/gas	Jamaica	Americas	Latin America and the Caribbean	Bogue power station	1			120	operating	2003		CC	LNG/D					Jamaica Public Service Co Ltd [100%]	Korea Electric Power Corp [40.0%]; Marubeni Corp [40.0%]; Development Bank of Jamaica [19.9%]; other [0.1%]	18.4521	-77.9183	exact	Montego Bay		St James	Cornwall	https://gem.wiki/Bogue_power_station	L100000406600	G100000406671	KR7015760002	0.4	120	120	21	2043	2083	2123	48	48	48	48	48	48	48	48	48	48	48	48
oil/gas	South Korea	Asia	Eastern Asia	Boryeong power station	CC1	보령C/C	Poryong	450	operating	2002		CC	LNG					Korea Midland Power Co Ltd [100.0%]	Korea Electric Power Corp [100.0%]	36.4009	126.491	exact	Boryeong-si			Chungcheongnam-do	https://www.gem.wiki/Boryeong_power_station	L100000103477	G100000401387	KR7015760002	1	5400		22	2042	2082	2122	450	450	450	450	450	450	450	450	450	450	450	450
oil/gas	South Korea	Asia	Eastern Asia	Boryeong power station	CC2	보령C/C	Poryong	450	operating	2002		CC	LNG					Korea Midland Power Co Ltd [100.0%]	Korea Electric Power Corp [100.0%]	36.4009	126.491	exact	Boryeong-si			Chungcheongnam-do	https://www.gem.wiki/Boryeong_power_station	L100000103477	G100000401388	KR7015760002	1	5400		22	2042	2082	2122	450	450	450	450	450	450	450	450	450	450	450	450
oil/gas	South Korea	Asia	Eastern Asia	Boryeong power station	CC3	보령C/C	Poryong	450	operating	2002		CC	LNG					Korea Midland Power Co Ltd [100.0%]	Korea Electric Power Corp [100.0%]	36.4009	126.491	exact	Boryeong-si			Chungcheongnam-do	https://www.gem.wiki/Boryeong_power_station	L100000103477	G100000401389	KR7015760002	1	5400		22	2042	2082	2122	450	450	450	450	450	450	450	450	450	450	450	450
oil/gas	South Korea	Asia	Eastern Asia	Boryeong power station	CC5	보령C/C	Poryong	500	pre-construction	2025		not found	LNG					Korea Midland Power Co Ltd [100.0%]	Korea Electric Power Corp [100.0%]	36.4009	126.491	exact	Boryeong-si			Chungcheongnam-do	https://www.gem.wiki/Boryeong_power_station	L100000103477	G100000406128	KR7015760002	1	5400		-1	2065	2105	2145	0	0	0	0	0	500	500	500	500	500	500	500
oil/gas	South Korea	Asia	Eastern Asia	Boryeong power station	CC6	보령C/C	Poryong	500	announced	2025		not found	LNG					Korea Midland Power Co Ltd [100.0%]	Korea Electric Power Corp [100.0%]	36.4009	126.491	exact	Boryeong-si			Chungcheongnam-do	https://www.gem.wiki/Boryeong_power_station	L100000103477	G100000406129	KR7015760002	1	5400	5400	-1	2065	2105	2145	0	0	0	0	0	500	500	500	500	500	500	500
oil/gas	South Korea	Asia	Eastern Asia	Bundang power station	1	분당C/C		574	operating	1993		CC	LNG					Korea South-East Power Co Ltd [100.0%]	Korea Electric Power Corp [100.0%]	37.3642	127.148	exact	Seongnam-si			Gyeonggi-do	https://www.gem.wiki/Bundang_power_station	L100000401353	G100000401354	KR7015760002	1	922		31	2033	2073	2113	574	574	574	574	574	574	574	574	574	574	574	574
oil/gas	South Korea	Asia	Eastern Asia	Bundang power station	2	분당C/C		348	operating	1997		CC	LNG					Korea South-East Power Co Ltd [100.0%]	Korea Electric Power Corp [100.0%]	37.3642	127.148	exact	Seongnam-si			Gyeonggi-do	https://www.gem.wiki/Bundang_power_station	L100000401353	G100000401355	KR7015760002	1	922	922	27	2037	2077	2117	348	348	348	348	348	348	348	348	348	348	348	348
oil/gas	South Korea	Asia	Eastern Asia	Busan power station	1	부산C/C	Pusan	450	operating	2001		CC	LNG					Korea Southern Power Co Ltd [100.0%]	Korea Electric Power Corp [100.0%]	35.0851	129	exact	Busan-si			Busan	https://www.gem.wiki/Busan_power_station	L100000401355	G100000401356	KR7015760002	1	1800		23	2041	2081	2121	450	450	450	450	450	450	450	450	450	450	450	450
oil/gas	South Korea	Asia	Eastern Asia	Busan power station	2	부산C/C	Pusan	450	operating	2002		CC	LNG					Korea Southern Power Co Ltd [100.0%]	Korea Electric Power Corp [100.0%]	35.0851	129	exact	Busan-si			Busan	https://www.gem.wiki/Busan_power_station	L100000401355	G100000401357	KR7015760002	1	1800		22	2042	2082	2122	450	450	450	450	450	450	450	450	450	450	450	450
oil/gas	South Korea	Asia	Eastern Asia	Busan power station	3	부산C/C	Pusan	450	operating	2003		CC	LNG					Korea Southern Power Co Ltd [100.0%]	Korea Electric Power Corp [100.0%]	35.0851	129	exact	Busan-si			Busan	https://www.gem.wiki/Busan_power_station	L100000401355	G100000401358	KR7015760002	1	1800		21	2043	2083	2123	450	450	450	450	450	450	450	450	450	450	450	450
oil/gas	South Korea	Asia	Eastern Asia	Busan power station	4	부산C/C	Pusan	450	operating	2004		CC	LNG					Korea Southern Power Co Ltd [100.0%]	Korea Electric Power Corp [100.0%]	35.0851	129	exact	Busan-si			Busan	https://www.gem.wiki/Busan_power_station	L100000401355	G100000401359	KR7015760002	1	1800	1800	20	2044	2084	2124	450	450	450	450	450	450	450	450	450	450	450	450
oil/gas	South Korea	Asia	Eastern Asia	Chuncheon CHP power station	1			470	operating	2017		CC	LNG					Hanjin Heavy Industries [40.0%]; Korea East-West Power Co Ltd [29.9%]; POSCO Holdings Inc [29.9%]	Korea Electric Power Corp [29.9%]; POSCO Holdings Inc [29.9%]	37.8759	127.71	approximate	Chuncheon			Gangwon-do	https://www.gem.wiki/Chuncheon_CHP_power_station	L100000406311	G100000406131	KR7015760002	0.299	470	470	7	2057	2097	2137	140.53	140.53	140.53	140.53	140.53	140.53	140.53	140.53	140.53	140.53	140.53	140.53
oil/gas	South Korea	Asia	Eastern Asia	Daegu CHP power station	1	대구그린파워	Daegu Innovation City CHPP/Daegugreenpower	415	operating	2014		CC	LNG					Daegu Green Power Co Ltd [100.0%]	NongHyup Bank [46.5%]; Korea Electric Power Corp [29.0%]; Lotte E&C [19.9%]	35.8747	128.612	approximate	Daegu				https://www.gem.wiki/Daegu_CHP_power_station	L100000406312	G100000406132	KR7015760002	0.29	415	415	10	2054	2094	2134	120.35	120.35	120.35	120.35	120.35	120.35	120.35	120.35	120.35	120.35	120.35	120.35
oil/gas	South Korea	Asia	Eastern Asia	Dongducheon power station	1	동두천C/C		858	operating	2015		CC	LNG					Dongducheon Dream Power Co Ltd [100.0%]	Korea Electric Power Corp [33.6%]; Samsung C&T Corp [31.5%]; HDC Hyundai Development Co [31.0%]	37.903	127.09	exact	Dongducheon-si			Gyeonggi-do	https://www.gem.wiki/Dongducheon_power_station	L100000401365	G100000401366	KR7015760002	0.336	1716		9	2055	2095	2135	288.288	288.288	288.288	288.288	288.288	288.288	288.288	288.288	288.288	288.288	288.288	288.288
oil/gas	South Korea	Asia	Eastern Asia	Dongducheon power station	2	동두천C/C		858	operating	2015		CC	LNG					Dongducheon Dream Power Co Ltd [100.0%]	Korea Electric Power Corp [33.6%]; Samsung C&T Corp [31.5%]; HDC Hyundai Development Co [31.0%]	37.903	127.09	exact	Dongducheon-si			Gyeonggi-do	https://www.gem.wiki/Dongducheon_power_station	L100000401365	G100000401367	KR7015760002	0.336	1716	1716	9	2055	2095	2135	288.288	288.288	288.288	288.288	288.288	288.288	288.288	288.288	288.288	288.288	288.288	288.288
oil/gas	Nigeria	Africa	Sub-Saharan Africa	Egbin power station	1			220	operating	1985		ST	NG					Egbin Power PLC [100.0%]	KEPCO Energy Resources Ltd [70.0%]; Bureau of Public Enterprises (Nigeria) [24.0%]; Ministry of Finance Incorporated (Nigeria) [6.0%]	6.56371	3.61508	exact	Ijede			Lagos	https://www.gem.wiki/Egbin_power_station	L100000406784	G100000407164	KR7015760002	0.7	3120		39	2025	2065	2105	154	154	154	154	154	154	154	154	154	154	154	154
oil/gas	Nigeria	Africa	Sub-Saharan Africa	Egbin power station	2			220	operating	1985		ST	NG					Egbin Power PLC [100.0%]	KEPCO Energy Resources Ltd [70.0%]; Bureau of Public Enterprises (Nigeria) [24.0%]; Ministry of Finance Incorporated (Nigeria) [6.0%]	6.56371	3.61508	exact	Ijede			Lagos	https://www.gem.wiki/Egbin_power_station	L100000406784	G100000407165	KR7015760002	0.7	3120		39	2025	2065	2105	154	154	154	154	154	154	154	154	154	154	154	154
oil/gas	Nigeria	Africa	Sub-Saharan Africa	Egbin power station	3			220	operating	1985		ST	NG					Egbin Power PLC [100.0%]	KEPCO Energy Resources Ltd [70.0%]; Bureau of Public Enterprises (Nigeria) [24.0%]; Ministry of Finance Incorporated (Nigeria) [6.0%]	6.56371	3.61508	exact	Ijede			Lagos	https://www.gem.wiki/Egbin_power_station	L100000406784	G100000407166	KR7015760002	0.7	3120		39	2025	2065	2105	154	154	154	154	154	154	154	154	154	154	154	154
oil/gas	Nigeria	Africa	Sub-Saharan Africa	Egbin power station	4			220	operating	1985		ST	NG					Egbin Power PLC [100.0%]	KEPCO Energy Resources Ltd [70.0%]; Bureau of Public Enterprises (Nigeria) [24.0%]; Ministry of Finance Incorporated (Nigeria) [6.0%]	6.56371	3.61508	exact	Ijede			Lagos	https://www.gem.wiki/Egbin_power_station	L100000406784	G100000407167	KR7015760002	0.7	3120		39	2025	2065	2105	154	154	154	154	154	154	154	154	154	154	154	154
oil/gas	Nigeria	Africa	Sub-Saharan Africa	Egbin power station	5			220	operating	1985		ST	NG					Egbin Power PLC [100.0%]	KEPCO Energy Resources Ltd [70.0%]; Bureau of Public Enterprises (Nigeria) [24.0%]; Ministry of Finance Incorporated (Nigeria) [6.0%]	6.56371	3.61508	exact	Ijede			Lagos	https://www.gem.wiki/Egbin_power_station	L100000406784	G100000407168	KR7015760002	0.7	3120		39	2025	2065	2105	154	154	154	154	154	154	154	154	154	154	154	154
oil/gas	Nigeria	Africa	Sub-Saharan Africa	Egbin power station	6			220	operating	1985		ST	NG					Egbin Power PLC [100.0%]	KEPCO Energy Resources Ltd [70.0%]; Bureau of Public Enterprises (Nigeria) [24.0%]; Ministry of Finance Incorporated (Nigeria) [6.0%]	6.56371	3.61508	exact	Ijede			Lagos	https://www.gem.wiki/Egbin_power_station	L100000406784	G100000407169	KR7015760002	0.7	3120		39	2025	2065	2105	154	154	154	154	154	154	154	154	154	154	154	154
oil/gas	Nigeria	Africa	Sub-Saharan Africa	Egbin power station	B			1800	announced	2025		GT	LNG					Egbin Power PLC [100.0%]	KEPCO Energy Resources Ltd [70.0%]; Bureau of Public Enterprises (Nigeria) [24.0%]; Ministry of Finance Incorporated (Nigeria) [6.0%]	6.56371	3.61508	exact	Ijede			Lagos	https://www.gem.wiki/Egbin_power_station	L100000406784	G100000407170	KR7015760002	0.7	3120	3120	-1	2065	2105	2145	0	0	0	0	0	1260	1260	1260	1260	1260	1260	1260
oil/gas	South Korea	Asia	Eastern Asia	Eumseong power station	CC1			561	construction	2026		CC	LNG/LPG					Korea East-West Power Co Ltd [100.0%]	Korea Electric Power Corp [100.0%]	36.9418	127.655	approximate	Eumseong-eup		Eumseong-gun	Chungcheongbuk-do	https://www.gem.wiki/Eumseong_power_station	L100000401363	G100000401364	KR7015760002	1	1122		-2	2066	2106	2146	0	0	0	0	0	0	561	561	561	561	561	561
oil/gas	South Korea	Asia	Eastern Asia	Eumseong power station	CC2			561	construction	2026		CC	LNG					Korea East-West Power Co Ltd [100.0%]	Korea Electric Power Corp [100.0%]	36.9418	127.655	approximate	Eumseong-eup		Eumseong-gun	Chungcheongbuk-do	https://www.gem.wiki/Eumseong_power_station	L100000401363	G100000412629	KR7015760002	1	1122	1122	-2	2066	2106	2146	0	0	0	0	0	0	561	561	561	561	561	561
oil/gas	South Korea	Asia	Eastern Asia	Gimpo CHP power station	1			270	operating	2023		GT	LNG					Korea Western Power Co Ltd [100.0%]	Korea Electric Power Corp [100.0%]	37.6498	126.638	approximate	Gimpo			Gyeonggi-do	https://www.gem.wiki/Gimpo_CHP_power_station	L100000406314	G100000406135	KR7015760002	1	495		1	2063	2103	2143	0	0	0	270	270	270	270	270	270	270	270	270
oil/gas	South Korea	Asia	Eastern Asia	Gimpo CHP power station	2			225	construction	2025		ST	LNG					Korea Western Power Co Ltd [100.0%]	Korea Electric Power Corp [100.0%]	37.6498	126.638	approximate	Gimpo			Gyeonggi-do	https://www.gem.wiki/Gimpo_CHP_power_station	L100000406314	G100000412628	KR7015760002	1	495	495	-1	2065	2105	2145	0	0	0	0	0	225	225	225	225	225	225	225
oil/gas	South Korea	Asia	Eastern Asia	Gumi Combined Cycle power plant	1			501	construction	2025		CC	LNG					Korea Western Power Co Ltd [100.0%]	Korea Electric Power Corp [100.0%]	36.2073	128.356	approximate	Haepyeong-myeon - Gumi-si			Gyeongsangbuk-do	https://www.gem.wiki/Gumi_Combined_Cycle_power_plant	L100000407738	G100000410206	KR7015760002	1	501	501	-1	2065	2105	2145	0	0	0	0	0	501	501	501	501	501	501	501
oil/gas	South Korea	Asia	Eastern Asia	Gunsan CC power station	1	군산C/C		718	operating	2010		CC	LNG					Korea Western Power Co Ltd [100.0%]	Korea Electric Power Corp [100.0%]	35.9836	126.731	exact	Gunsan-si			Jeollabuk-do	https://www.gem.wiki/Gunsan_CC_power_station	L100000401367	G100000401368	KR7015760002	1	718	718	14	2050	2090	2130	718	718	718	718	718	718	718	718	718	718	718	718
oil/gas	South Korea	Asia	Eastern Asia	Hadong power station	1			500	announced	2026		not found	LNG					Korea Southern Power Co Ltd [100.0%]	Korea Electric Power Corp [100.0%]	34.9524	127.82	exact	Gyeongjesaneop	Geumseong	Hadong	Gyeongsangnam-do	https://www.gem.wiki/Hadong_power_station	L100000103485	G100000406138	KR7015760002	1	7000		-2	2066	2106	2146	0	0	0	0	0	0	500	500	500	500	500	500
oil/gas	South Korea	Asia	Eastern Asia	Hadong power station	2			500	announced	2027		not found	LNG					Korea Southern Power Co Ltd [100.0%]	Korea Electric Power Corp [100.0%]	34.9524	127.82	exact	Gyeongjesaneop	Geumseong	Hadong	Gyeongsangnam-do	https://www.gem.wiki/Hadong_power_station	L100000103485	G100000406139	KR7015760002	1	7000		-3	2067	2107	2147	0	0	0	0	0	0	0	500	500	500	500	500
oil/gas	South Korea	Asia	Eastern Asia	Hadong power station	3			500	announced	2028		not found	LNG					Korea Southern Power Co Ltd [100.0%]	Korea Electric Power Corp [100.0%]	34.9524	127.82	exact	Gyeongjesaneop	Geumseong	Hadong	Gyeongsangnam-do	https://www.gem.wiki/Hadong_power_station	L100000103485	G100000406140	KR7015760002	1	7000		-4	2068	2108	2148	0	0	0	0	0	0	0	0	500	500	500	500
oil/gas	South Korea	Asia	Eastern Asia	Hadong power station	4			500	announced	2028		not found	LNG					Korea Southern Power Co Ltd [100.0%]	Korea Electric Power Corp [100.0%]	34.9524	127.82	exact	Gyeongjesaneop	Geumseong	Hadong	Gyeongsangnam-do	https://www.gem.wiki/Hadong_power_station	L100000103485	G100000406141	KR7015760002	1	7000		-4	2068	2108	2148	0	0	0	0	0	0	0	0	500	500	500	500
oil/gas	South Korea	Asia	Eastern Asia	Hadong power station	5			500	announced	2031		not found	LNG					Korea Southern Power Co Ltd [100.0%]	Korea Electric Power Corp [100.0%]	34.9524	127.82	exact	Gyeongjesaneop	Geumseong	Hadong	Gyeongsangnam-do	https://www.gem.wiki/Hadong_power_station	L100000103485	G100000406142	KR7015760002	1	7000		-7	2071	2111	2151	0	0	0	0	0	0	0	0	0	0	0	500
oil/gas	South Korea	Asia	Eastern Asia	Hadong power station	6			500	announced	2031		not found	LNG					Korea Southern Power Co Ltd [100.0%]	Korea Electric Power Corp [100.0%]	34.9524	127.82	exact	Gyeongjesaneop	Geumseong	Hadong	Gyeongsangnam-do	https://www.gem.wiki/Hadong_power_station	L100000103485	G100000406143	KR7015760002	1	7000	7000	-7	2071	2111	2151	0	0	0	0	0	0	0	0	0	0	0	500
oil/gas	Vietnam	Asia	South-eastern Asia	Hai Lang power station	1-1			1500	announced	2030		CC	LNG					Korea Gas Corp; Korea Southern Power Co Ltd; T&T Group JSC	Korea Electric Power Corp; Korea Gas Corp; T&T Group JSC	16.9944	107.115	approximate	not found			Quảng Trị	https://www.gem.wiki/Hai_Lang_power_station	L100000405976	G100000405995	KR7015760002	0.333333	1500	1500	-6	2070	2110	2150	0	0	0	0	0	0	0	0	0	0	500	500
oil/gas	South Korea	Asia	Eastern Asia	Hallim Complex power station	1	한림복합	Hanlim	105	operating	1997		CC	LNG					Korea Southern Power Co Ltd [100.0%]	Korea Electric Power Corp [100.0%]	33.4028	126.272	exact	Hallim		Jeju-si	Jeju-do	https://www.gem.wiki/Hallim_Complex_power_station	L100000408494	G100000412627	KR7015760002	1	105	105	27	2037	2077	2117	105	105	105	105	105	105	105	105	105	105	105	105
oil/gas	Jamaica	Americas	Latin America and the Caribbean	Hunts Bay power station	1			143	announced	2027		CC	LNG					Jamaica Public Service Co Ltd [100%]	Korea Electric Power Corp [40.0%]; Marubeni Corp [40.0%]; Development Bank of Jamaica [19.9%]; other [0.1%]	17.9718	-76.81	exact	Kingston			Surrey	https://gem.wiki/Hunts_Bay_power_station	L100000407910	G100000411248	KR7015760002	0.4	143	143	-3	2067	2107	2147	0	0	0	0	0	0	0	57.2	57.2	57.2	57.2	57.2
oil/gas	South Korea	Asia	Eastern Asia	Ilsan power station	1			630	operating	1993		CC	LNG					Korea East-West Power Co Ltd [100.0%]	Korea Electric Power Corp [100.0%]	37.6479	126.797	exact	Goyang			Gyeonggi-do	https://www.gem.wiki/Ilsan_power_station	L100000406319	G100000406146	KR7015760002	1	930		31	2033	2073	2113	630	630	630	630	630	630	630	630	630	630	630	630
oil/gas	South Korea	Asia	Eastern Asia	Ilsan power station	2			300	operating	1996		CC	LNG					Korea East-West Power Co Ltd [100.0%]	Korea Electric Power Corp [100.0%]	37.6479	126.797	exact	Goyang			Gyeonggi-do	https://www.gem.wiki/Ilsan_power_station	L100000406319	G100000406147	KR7015760002	1	930	930	28	2036	2076	2116	300	300	300	300	300	300	300	300	300	300	300	300
oil/gas	United States	Americas	Northern America	Indeck Niles energy center	CC_set			1174	operating	2022		CC	NG					KOSPO USA [50.0%]; DL-Energy [30.0%]; Indeck Energy Services Inc [20.0%]	Korea Electric Power Corp [50.0%]; DL Holdings [21.0%]; Daelim co.,Ltd [9.0%]	41.8621	-86.2214	exact	Niles	Cass		Michigan	https://www.gem.wiki/Indeck_Niles_energy_center	L100000402411	G100000401930	KR7015760002	0.5	1174	1174	2	2062	2102	2142	0	0	587	587	587	587	587	587	587	587	587	587
oil/gas	Jordan	Asia	Western Asia	IPP3 ICE power plant	1			573.8	operating	2015		IC	NG/FO/D					Amman Asia Electric Power Company PSC [100.0%]	Korea Electric Power Corp [60.0%]; Mitsubishi Corp; Wärtsilä Oyj	31.9552	35.945	approximate	Amman			Amman	https://www.gem.wiki/IPP3_ICE_power_plant	L100000408212	G100000411581	KR7015760002	0.5	573.8	573.8	9	2055	2095	2135	286.9	286.9	286.9	286.9	286.9	286.9	286.9	286.9	286.9	286.9	286.9	286.9
oil/gas	South Korea	Asia	Eastern Asia	Jeju thermal power station	CC1		Bukjeju	114	operating	2018		CC	LNG					Korea Midland Power Co Ltd [100.0%]	Korea Electric Power Corp [100.0%]	33.5345	126.593	exact	Jeju-si			Jeju-do	https://www.gem.wiki/Jeju_thermal_power_station	L100000401414	G100000401415	KR7015760002	1	228		6	2058	2098	2138	114	114	114	114	114	114	114	114	114	114	114	114
oil/gas	South Korea	Asia	Eastern Asia	Jeju thermal power station	CC2		Bukjeju	114	operating	2018		CC	LNG					Korea Midland Power Co Ltd [100.0%]	Korea Electric Power Corp [100.0%]	33.5345	126.593	exact	Jeju-si			Jeju-do	https://www.gem.wiki/Jeju_thermal_power_station	L100000401414	G100000401416	KR7015760002	1	228	228	6	2058	2098	2138	114	114	114	114	114	114	114	114	114	114	114	114
oil/gas	South Korea	Asia	Eastern Asia	KOMIPO Incheon power station	1	인천C/C		504	operating	2005		CC	LNG					Korea Midland Power Co Ltd [100.0%]	Korea Electric Power Corp [100.0%]	37.5109	126.609	exact	Incheon-si			Incheon	https://www.gem.wiki/KOMIPO_Incheon_power_station	L100000401370	G100000401371	KR7015760002	1	1463		19	2045	2085	2125	504	504	504	504	504	504	504	504	504	504	504	504
oil/gas	South Korea	Asia	Eastern Asia	KOMIPO Incheon power station	2	인천C/C		509	operating	2009		CC	LNG					Korea Midland Power Co Ltd [100.0%]	Korea Electric Power Corp [100.0%]	37.5109	126.609	exact	Incheon-si			Incheon	https://www.gem.wiki/KOMIPO_Incheon_power_station	L100000401370	G100000401372	KR7015760002	1	1463		15	2049	2089	2129	509	509	509	509	509	509	509	509	509	509	509	509
oil/gas	South Korea	Asia	Eastern Asia	KOMIPO Incheon power station	3	인천C/C		450	operating	2012		CC	LNG					Korea Midland Power Co Ltd [100.0%]	Korea Electric Power Corp [100.0%]	37.5109	126.609	exact	Incheon-si			Incheon	https://www.gem.wiki/KOMIPO_Incheon_power_station	L100000401370	G100000401373	KR7015760002	1	1463	1463	12	2052	2092	2132	450	450	450	450	450	450	450	450	450	450	450	450
oil/gas	Angola	Africa	Sub-Saharan Africa	Lobito power station	1-1		Benguela	375	pre-construction	2027		CC	NG					Beltec Engenharia e Serviços [25.0%]; Busan Korea Biotechnology (BKB) [25.0%]; Hyundai Engineering Co Ltd [25.0%]; Korea Southern Power Co Ltd [25.0%]	Hyundai Motor Group [25.0%]; Korea Electric Power Corp [25.0%]	-12.3665	13.5328	approximate	Lobito			Benguela	https://www.gem.wiki/Lobito_power_station	L100000406735	G100000407060	KR7015760002	0.25	750		-3	2067	2107	2147	0	0	0	0	0	0	0	93.75	93.75	93.75	93.75	93.75
oil/gas	Angola	Africa	Sub-Saharan Africa	Lobito power station	1-2		Benguela	375	pre-construction	2029		CC	NG					Beltec Engenharia e Serviços [25.0%]; Busan Korea Biotechnology (BKB) [25.0%]; Hyundai Engineering Co Ltd [25.0%]; Korea Southern Power Co Ltd [25.0%]	Hyundai Motor Group [25.0%]; Korea Electric Power Corp [25.0%]	-12.3665	13.5328	approximate	Lobito			Benguela	https://www.gem.wiki/Lobito_power_station	L100000406735	G100000407061	KR7015760002	0.25	750	750	-5	2069	2109	2149	0	0	0	0	0	0	0	0	0	93.75	93.75	93.75
oil/gas	India	Asia	Southern Asia	Mangaon Combined Cycle power plant	1			388	operating	2016		CC	NG					Pioneer Gas Power Ltd [100.0%]	Korea Electric Power Corp [38.5%]	18.3879	73.3529	exact	Bhagad			Maharashtra	https://www.gem.wiki/Mangaon_Combined_Cycle_power_plant	L100000401488	G100000401458	KR7015760002	0.385	388	388	8	2056	2096	2136	149.38	149.38	149.38	149.38	149.38	149.38	149.38	149.38	149.38	149.38	149.38	149.38
oil/gas	South Korea	Asia	Eastern Asia	Naepo Green Energy power station	1			500	operating	2023		CC	NG					Naepo Green Energy Co Ltd [100.0%]	other [70.8%]; Korea Electric Power Corp [29.2%]	36.6549	126.677	approximate	Naepo			Chungcheongnam-do	https://www.gem.wiki/Naepo_Green_Energy_power_station	L100000406320	G100000406148	KR7015760002	0.292	500	500	1	2063	2103	2143	0	0	0	146	146	146	146	146	146	146	146	146
oil/gas	South Korea	Asia	Eastern Asia	Namjeju Power Complex	1	남제주복합	KOSPO Namjeju Power Plant	150	operating	2020		CC	LNG					Korea Southern Power Co Ltd [100.0%]	Korea Electric Power Corp [100.0%]	33.2368	126.34	exact	Seogwipo			Jeju-do	https://www.gem.wiki/Namjeju_Power_Complex	L100000406380	G100000406294	KR7015760002	1	296.24		4	2060	2100	2140	150	150	150	150	150	150	150	150	150	150	150	150
oil/gas	South Korea	Asia	Eastern Asia	Namjeju Power Complex	2	남제주복합	KOSPO Namjeju Power Plant	146.24	operating	2020		CC	LNG					Korea Southern Power Co Ltd [100.0%]	Korea Electric Power Corp [100.0%]	33.2368	126.34	exact	Seogwipo			Jeju-do	https://www.gem.wiki/Namjeju_Power_Complex	L100000406380	G100000412623	KR7015760002	1	296.24	296.24	4	2060	2100	2140	146.24	146.24	146.24	146.24	146.24	146.24	146.24	146.24	146.24	146.24	146.24	146.24
oil/gas	Mexico	Americas	Latin America and the Caribbean	Norte II power station	1	Central CC Norte II	KST/El Encino	433	operating	2014		CC	NG					KST Electric Power Company SAPI de CV [100%]	Korea Electric Power Corp [56.0%]; Samsung C&T Corp [34.0%]; Techint SA de CV [10.0%]	28.4422	-105.918	exact	Chihuahua			Chihuahua	https://gem.wiki/Norte_II_power_station	L100000406237	G100000406382	KR7015760002	0.56	433	433	10	2054	2094	2134	242.48	242.48	242.48	242.48	242.48	242.48	242.48	242.48	242.48	242.48	242.48	242.48
oil/gas	Malaysia	Asia	South-eastern Asia	Palua Indah power station	1			600	construction	2024		CC	NG					Worldwide Holdings Bhd [75.0%]; Korea Electric Power Corp [25.0%]	Perbadanan Kemajuan Negeri Selangor [75.0%]; Korea Electric Power Corp [25.0%]	2.94022	101.262	approximate	Pulau Indah			Selangor	https://www.gem.wiki/Palua_Indah_power_station	L100000405308	G100000404367	KR7015760002	0.25	1200		0	2064	2104	2144	0	0	0	0	150	150	150	150	150	150	150	150
oil/gas	Malaysia	Asia	South-eastern Asia	Palua Indah power station	2			600	construction	2024		CC	NG					Worldwide Holdings Bhd [75.0%]; Korea Electric Power Corp [25.0%]	Perbadanan Kemajuan Negeri Selangor [75.0%]; Korea Electric Power Corp [25.0%]	2.94022	101.262	approximate	Pulau Indah			Selangor	https://www.gem.wiki/Palua_Indah_power_station	L100000405308	G100000404368	KR7015760002	0.25	1200	1200	0	2064	2104	2144	0	0	0	0	150	150	150	150	150	150	150	150
oil/gas	South Korea	Asia	Eastern Asia	Pyeongtaek power station	1			350	operating	1980		ST	LNG					Korea Western Power Co Ltd [100.0%]	Korea Electric Power Corp [100.0%]	37.0058	126.798	exact	Pyeongtaek			Gyeonggi-do	https://www.gem.wiki/Pyeongtaek_power_station	L100000401389	G100000406153	KR7015760002	1	2268		44	2020	2060	2100	350	350	350	350	350	350	350	350	350	350	350	350
oil/gas	South Korea	Asia	Eastern Asia	Pyeongtaek power station	2			350	operating	1980		ST	LNG					Korea Western Power Co Ltd [100.0%]	Korea Electric Power Corp [100.0%]	37.0058	126.798	exact	Pyeongtaek			Gyeonggi-do	https://www.gem.wiki/Pyeongtaek_power_station	L100000401389	G100000412620	KR7015760002	1	2268		44	2020	2060	2100	350	350	350	350	350	350	350	350	350	350	350	350
oil/gas	South Korea	Asia	Eastern Asia	Pyeongtaek power station	3			350	operating	1983		ST	LNG					Korea Western Power Co Ltd [100.0%]	Korea Electric Power Corp [100.0%]	37.0058	126.798	exact	Pyeongtaek			Gyeonggi-do	https://www.gem.wiki/Pyeongtaek_power_station	L100000401389	G100000412619	KR7015760002	1	2268		41	2023	2063	2103	350	350	350	350	350	350	350	350	350	350	350	350
oil/gas	South Korea	Asia	Eastern Asia	Pyeongtaek power station	4			350	operating	1983		ST	LNG					Korea Western Power Co Ltd [100.0%]	Korea Electric Power Corp [100.0%]	37.0058	126.798	exact	Pyeongtaek			Gyeonggi-do	https://www.gem.wiki/Pyeongtaek_power_station	L100000401389	G100000412618	KR7015760002	1	2268		41	2023	2063	2103	350	350	350	350	350	350	350	350	350	350	350	350
oil/gas	South Korea	Asia	Eastern Asia	Pyeongtaek power station	CC2			868	operating	2014		CC	LNG					Korea Western Power Co Ltd [100.0%]	Korea Electric Power Corp [100.0%]	37.0058	126.798	exact	Pyeongtaek			Gyeonggi-do	https://www.gem.wiki/Pyeongtaek_power_station	L100000401389	G100000401390	KR7015760002	1	2268	2268	10	2054	2094	2134	868	868	868	868	868	868	868	868	868	868	868	868
oil/gas	South Korea	Asia	Eastern Asia	Samchonpo power station	CC3		Samcheonpo power station	560	announced	2026		not found	LNG					Korea South-East Power Co Ltd [100.0%]	Korea Electric Power Corp [100.0%]	34.9062	128.103	exact	Deokho	Hai	Goseong	Gyeongsangnam-do	https://www.gem.wiki/Samchonpo_power_station	L100000103487	G100000406154	KR7015760002	1	5360		-2	2066	2106	2146	0	0	0	0	0	0	560	560	560	560	560	560
oil/gas	South Korea	Asia	Eastern Asia	Samchonpo power station	CC4		Samcheonpo power station	560	announced	2026		not found	LNG					Korea South-East Power Co Ltd [100.0%]	Korea Electric Power Corp [100.0%]	34.9062	128.103	exact	Deokho	Hai	Goseong	Gyeongsangnam-do	https://www.gem.wiki/Samchonpo_power_station	L100000103487	G100000406155	KR7015760002	1	5360		-2	2066	2106	2146	0	0	0	0	0	0	560	560	560	560	560	560
oil/gas	South Korea	Asia	Eastern Asia	Samchonpo power station	CC5		Samcheonpo power station	500	announced	2027		not found	LNG					Korea South-East Power Co Ltd [100.0%]	Korea Electric Power Corp [100.0%]	34.9062	128.103	exact	Deokho	Hai	Goseong	Gyeongsangnam-do	https://www.gem.wiki/Samchonpo_power_station	L100000103487	G100000406156	KR7015760002	1	5360		-3	2067	2107	2147	0	0	0	0	0	0	0	500	500	500	500	500
oil/gas	South Korea	Asia	Eastern Asia	Samchonpo power station	CC6		Samcheonpo power station	500	announced	2028		not found	LNG					Korea South-East Power Co Ltd [100.0%]	Korea Electric Power Corp [100.0%]	34.9062	128.103	exact	Deokho	Hai	Goseong	Gyeongsangnam-do	https://www.gem.wiki/Samchonpo_power_station	L100000103487	G100000406157	KR7015760002	1	5360	5360	-4	2068	2108	2148	0	0	0	0	0	0	0	0	500	500	500	500
oil/gas	South Korea	Asia	Eastern Asia	Sejong (KOMIPO) power station	1			530	operating	2013		CC	LNG					Korea Midland Power Co Ltd [100.0%]	Korea Electric Power Corp [100.0%]	36.4686	127.247	exact	Sejong	Songwan		Chungcheongnam-do	https://www.gem.wiki/Sejong_(KOMIPO)_power_station	L100000406325	G100000406158	KR7015760002	1	530	530	11	2053	2093	2133	530	530	530	530	530	530	530	530	530	530	530	530
oil/gas	South Korea	Asia	Eastern Asia	Seoincheon KOWEPO power station	1	서인천C/C		225	operating	1992		CC	LNG					Korea Western Power Co Ltd [100.0%]	Korea Electric Power Corp [100.0%]	37.5363	126.603	exact	Seo-gu			Incheon	https://www.gem.wiki/Seoincheon_KOWEPO_power_station	L100000401390	G100000401391	KR7015760002	1	1800		32	2032	2072	2112	225	225	225	225	225	225	225	225	225	225	225	225
oil/gas	South Korea	Asia	Eastern Asia	Seoincheon KOWEPO power station	2	서인천C/C		225	operating	1992		CC	LNG					Korea Western Power Co Ltd [100.0%]	Korea Electric Power Corp [100.0%]	37.5363	126.603	exact	Seo-gu			Incheon	https://www.gem.wiki/Seoincheon_KOWEPO_power_station	L100000401390	G100000401392	KR7015760002	1	1800		32	2032	2072	2112	225	225	225	225	225	225	225	225	225	225	225	225
oil/gas	South Korea	Asia	Eastern Asia	Seoincheon KOWEPO power station	3	서인천C/C		225	operating	1992		CC	LNG					Korea Western Power Co Ltd [100.0%]	Korea Electric Power Corp [100.0%]	37.5363	126.603	exact	Seo-gu			Incheon	https://www.gem.wiki/Seoincheon_KOWEPO_power_station	L100000401390	G100000401393	KR7015760002	1	1800		32	2032	2072	2112	225	225	225	225	225	225	225	225	225	225	225	225
oil/gas	South Korea	Asia	Eastern Asia	Seoincheon KOWEPO power station	4	서인천C/C		225	operating	1992		CC	LNG					Korea Western Power Co Ltd [100.0%]	Korea Electric Power Corp [100.0%]	37.5363	126.603	exact	Seo-gu			Incheon	https://www.gem.wiki/Seoincheon_KOWEPO_power_station	L100000401390	G100000401394	KR7015760002	1	1800		32	2032	2072	2112	225	225	225	225	225	225	225	225	225	225	225	225
oil/gas	South Korea	Asia	Eastern Asia	Seoincheon KOWEPO power station	5	서인천C/C		225	operating	1992		CC	LNG					Korea Western Power Co Ltd [100.0%]	Korea Electric Power Corp [100.0%]	37.5363	126.603	exact	Seo-gu			Incheon	https://www.gem.wiki/Seoincheon_KOWEPO_power_station	L100000401390	G100000401395	KR7015760002	1	1800		32	2032	2072	2112	225	225	225	225	225	225	225	225	225	225	225	225
oil/gas	South Korea	Asia	Eastern Asia	Seoincheon KOWEPO power station	6	서인천C/C		225	operating	1992		CC	LNG					Korea Western Power Co Ltd [100.0%]	Korea Electric Power Corp [100.0%]	37.5363	126.603	exact	Seo-gu			Incheon	https://www.gem.wiki/Seoincheon_KOWEPO_power_station	L100000401390	G100000401396	KR7015760002	1	1800		32	2032	2072	2112	225	225	225	225	225	225	225	225	225	225	225	225
oil/gas	South Korea	Asia	Eastern Asia	Seoincheon KOWEPO power station	7	서인천C/C		225	operating	1992		CC	LNG					Korea Western Power Co Ltd [100.0%]	Korea Electric Power Corp [100.0%]	37.5363	126.603	exact	Seo-gu			Incheon	https://www.gem.wiki/Seoincheon_KOWEPO_power_station	L100000401390	G100000401397	KR7015760002	1	1800		32	2032	2072	2112	225	225	225	225	225	225	225	225	225	225	225	225
oil/gas	South Korea	Asia	Eastern Asia	Seoincheon KOWEPO power station	8	서인천C/C		225	operating	1992		CC	LNG					Korea Western Power Co Ltd [100.0%]	Korea Electric Power Corp [100.0%]	37.5363	126.603	exact	Seo-gu			Incheon	https://www.gem.wiki/Seoincheon_KOWEPO_power_station	L100000401390	G100000401398	KR7015760002	1	1800	1800	32	2032	2072	2112	225	225	225	225	225	225	225	225	225	225	225	225
oil/gas	South Korea	Asia	Eastern Asia	Seoul power station	1			400	operating	2019		CC	LNG					Korea Midland Power Co Ltd [100.0%]	Korea Electric Power Corp [100.0%]	37.5442	126.92	exact	Seoul			Gyeonggi-do	https://www.gem.wiki/Seoul_power_station	L100000401398	G100000401399	KR7015760002	1	800		5	2059	2099	2139	400	400	400	400	400	400	400	400	400	400	400	400
oil/gas	South Korea	Asia	Eastern Asia	Seoul power station	2			400	operating	2019		CC	LNG					Korea Midland Power Co Ltd [100.0%]	Korea Electric Power Corp [100.0%]	37.5442	126.92	exact	Seoul			Gyeonggi-do	https://www.gem.wiki/Seoul_power_station	L100000401398	G100000401400	KR7015760002	1	800	800	5	2059	2099	2139	400	400	400	400	400	400	400	400	400	400	400	400
oil/gas	South Korea	Asia	Eastern Asia	Shin Pyeongtaek power station	CC1	신평택복합	Shin Pyeongtaek	950	operating	2019		CC	LNG					Shin Pyongtaek Power Co Ltd [100.0%]	GS Energy Corp; Korea Electric Power Corp	37.0038	126.795	exact	Pyeongtaek			Gyeonggi-do	https://www.gem.wiki/Shin_Pyeongtaek_power_station	L100000408898	G100000401401	KR7015760002	0.5	950	950	5	2059	2099	2139	475	475	475	475	475	475	475	475	475	475	475	475
oil/gas	South Korea	Asia	Eastern Asia	Shinincheon power station	1	신인천C/C	Seoinchon KOSPA/Seoincheon KOSPO/New Incheon Complex	450	operating	1997		CC	LNG					Korea Southern Power Co Ltd [100.0%]	Korea Electric Power Corp [100.0%]	37.508	126.616	exact	Seo-gu			Incheon	https://www.gem.wiki/Shinincheon_power_station	L100000401409	G100000401410	KR7015760002	1	1800		27	2037	2077	2117	450	450	450	450	450	450	450	450	450	450	450	450
oil/gas	South Korea	Asia	Eastern Asia	Shinincheon power station	2	신인천C/C	Seoinchon KOSPA/Seoincheon KOSPO/New Incheon Complex	450	operating	1997		CC	LNG					Korea Southern Power Co Ltd [100.0%]	Korea Electric Power Corp [100.0%]	37.508	126.616	exact	Seo-gu			Incheon	https://www.gem.wiki/Shinincheon_power_station	L100000401409	G100000401411	KR7015760002	1	1800		27	2037	2077	2117	450	450	450	450	450	450	450	450	450	450	450	450
oil/gas	South Korea	Asia	Eastern Asia	Shinincheon power station	3	신인천C/C	Seoinchon KOSPA/Seoincheon KOSPO/New Incheon Complex	450	operating	1997		CC	LNG					Korea Southern Power Co Ltd [100.0%]	Korea Electric Power Corp [100.0%]	37.508	126.616	exact	Seo-gu			Incheon	https://www.gem.wiki/Shinincheon_power_station	L100000401409	G100000401412	KR7015760002	1	1800		27	2037	2077	2117	450	450	450	450	450	450	450	450	450	450	450	450
oil/gas	South Korea	Asia	Eastern Asia	Shinincheon power station	4	신인천C/C	Seoinchon KOSPA/Seoincheon KOSPO/New Incheon Complex	450	operating	1997		CC	LNG					Korea Southern Power Co Ltd [100.0%]	Korea Electric Power Corp [100.0%]	37.508	126.616	exact	Seo-gu			Incheon	https://www.gem.wiki/Shinincheon_power_station	L100000401409	G100000401413	KR7015760002	1	1800	1800	27	2037	2077	2117	450	450	450	450	450	450	450	450	450	450	450	450
oil/gas	South Korea	Asia	Eastern Asia	Shinsejong power station	1		Shinsejong	630	construction	2024		CC	LNG					Korea Southern Power Co Ltd [100.0%]	Korea Electric Power Corp [100.0%]	36.5273	127.297	approximate	Sejong	Nuri-Ri	Yeongi-Myeon	Chungcheongnam-do	https://www.gem.wiki/Shinsejong_power_station	L100000406326	G100000406159	KR7015760002	1	630	630	0	2064	2104	2144	0	0	0	0	630	630	630	630	630	630	630	630
oil/gas	United Arab Emirates	Asia	Western Asia	Shuweihat S3 power plant	1	مجمع الشويهات للطاقة والمياه/محطة الشويهات S3 المستقلة للمياه والطاقة		823.5	operating	2014	2039	CC	NG					Korea Electric Power Corp [55.0%]; Sumitomo Corp [45.0%]	Korea Electric Power Corp [55.0%]; Sumitomo Corp [45.0%]	24.1535	52.5662	approximate	Jebel Dhanna			Abu Dhabi	https://www.gem.wiki/Shuweihat_S3_power_plant	L100000405594	G100000405051	KR7015760002	0.55	1647		10	2054	2094	2134	452.925	452.925	452.925	452.925	452.925	452.925	452.925	452.925	452.925	452.925	452.925	452.925
oil/gas	United Arab Emirates	Asia	Western Asia	Shuweihat S3 power plant	2	مجمع الشويهات للطاقة والمياه/محطة الشويهات S3 المستقلة للمياه والطاقة		823.5	operating	2014	2039	CC	NG					Korea Electric Power Corp [55.0%]; Sumitomo Corp [45.0%]	Korea Electric Power Corp [55.0%]; Sumitomo Corp [45.0%]	24.1535	52.5662	approximate	Jebel Dhanna			Abu Dhabi	https://www.gem.wiki/Shuweihat_S3_power_plant	L100000405594	G100000405052	KR7015760002	0.55	1647	1647	10	2054	2094	2134	452.925	452.925	452.925	452.925	452.925	452.925	452.925	452.925	452.925	452.925	452.925	452.925
oil/gas	Thailand	Asia	South-eastern Asia	Songkhla Chana power station	1			1700	announced			CC	LNG					Korea Western Power Co Ltd [100.0%]	Korea Electric Power Corp [100.0%]	7.31237	100.674	approximate	Chana Dist			Songkhla	https://www.gem.wiki/Songkhla_Chana_power_station	L100000407521	G100000409726	KR7015760002	1	1700	1700	-99	40	80	120	0	0	0	0	0	0	0	0	0	1700	1700	1700
oil/gas	Jamaica	Americas	Latin America and the Caribbean	South Jamaica Power Centre	1		Old Harbour power plant	194	operating	2019		CC	LNG					South Jamaica Power Co [100%]	Korea Electric Power Corp [40.0%]; Marubeni Corp [39.9%]; PetroCaribe Development Fund [10.0%]; Jamaica Public Service Co Ltd [10.0%]; other [0.0%]	17.8996	-77.1083	exact	Old Harbour Bay			St Catherine	https://gem.wiki/South_Jamaica_Power_Centre	L100000406599	G100000406670	KR7015760002	0.4	194	194	5	2059	2099	2139	77.6	77.6	77.6	77.6	77.6	77.6	77.6	77.6	77.6	77.6	77.6	77.6
oil/gas	South Korea	Asia	Eastern Asia	Taean power station	1			500	announced	2025		not found	LNG					Korea Western Power Co Ltd [100.0%]	Korea Electric Power Corp [100.0%]	36.9056	126.235	exact	Bangal	Wonbuk	Taean	Chungcheongnam-do	https://www.gem.wiki/Taean_power_station	L100000103483	G100000406161	KR7015760002	1	9446		-1	2065	2105	2145	0	0	0	0	0	500	500	500	500	500	500	500
oil/gas	South Korea	Asia	Eastern Asia	Taean power station	2			500	announced	2025		not found	LNG					Korea Western Power Co Ltd [100.0%]	Korea Electric Power Corp [100.0%]	36.9056	126.235	exact	Bangal	Wonbuk	Taean	Chungcheongnam-do	https://www.gem.wiki/Taean_power_station	L100000103483	G100000406162	KR7015760002	1	9446		-1	2065	2105	2145	0	0	0	0	0	500	500	500	500	500	500	500
oil/gas	South Korea	Asia	Eastern Asia	Taean power station	3			500	announced	2028		not found	LNG					Korea Western Power Co Ltd [100.0%]	Korea Electric Power Corp [100.0%]	36.9056	126.235	exact	Bangal	Wonbuk	Taean	Chungcheongnam-do	https://www.gem.wiki/Taean_power_station	L100000103483	G100000406163	KR7015760002	1	9446		-4	2068	2108	2148	0	0	0	0	0	0	0	0	500	500	500	500
oil/gas	South Korea	Asia	Eastern Asia	Taean power station	4			500	announced	2029		not found	LNG					Korea Western Power Co Ltd [100.0%]	Korea Electric Power Corp [100.0%]	36.9056	126.235	exact	Bangal	Wonbuk	Taean	Chungcheongnam-do	https://www.gem.wiki/Taean_power_station	L100000103483	G100000406164	KR7015760002	1	9446		-5	2069	2109	2149	0	0	0	0	0	0	0	0	0	500	500	500
oil/gas	South Korea	Asia	Eastern Asia	Taean power station	5			500	announced	2032		not found	LNG					Korea Western Power Co Ltd [100.0%]	Korea Electric Power Corp [100.0%]	36.9056	126.235	exact	Bangal	Wonbuk	Taean	Chungcheongnam-do	https://www.gem.wiki/Taean_power_station	L100000103483	G100000406165	KR7015760002	1	9446		-8	2072	2112	2152	0	0	0	0	0	0	0	0	0	0	0	0
oil/gas	South Korea	Asia	Eastern Asia	Taean power station	6			500	announced	2032		not found	LNG					Korea Western Power Co Ltd [100.0%]	Korea Electric Power Corp [100.0%]	36.9056	126.235	exact	Bangal	Wonbuk	Taean	Chungcheongnam-do	https://www.gem.wiki/Taean_power_station	L100000103483	G100000406166	KR7015760002	1	9446	9446	-8	2072	2112	2152	0	0	0	0	0	0	0	0	0	0	0	0
oil/gas	United States	Americas	Northern America	Trumbull Energy Center power station	CC1			950	construction	2026		CC	NG/D					Korea Overseas Infrastructure & Urban Development Corp Corp; Korea Southern Power Co Ltd; Siemens Energy Inc	Korea Electric Power Corp; Korea Overseas Infrastructure & Urban Development Corp Corp; Siemens Energy AG	41.1502	-80.8537	exact	Lordstown	Trumbull		Ohio	https://www.gem.wiki/Trumbull_Energy_Center_power_station	L100000408878	G100000413022	KR7015760002	0.333333	950	950	-2	2066	2106	2146	0	0	0	0	0	0	316.667	316.667	316.667	316.667	316.667	316.667
oil/gas	United States	Americas	Northern America	Ukudu power station	1		Dededo	180	construction	2024		CC	NG/D					Guam Ukudu Power LLC [100.0%]	Kansai Electric Power Co [60.0%]; Korea Electric Power Corp [40.0%]	13.524	144.807	approximate	Dededo			Guam	https://www.gem.wiki/Ukudu_power_station	L100000406935	G100000407918	KR7015760002	0.4	180	180	0	2064	2104	2144	0	0	0	0	72	72	72	72	72	72	72	72
oil/gas	South Korea	Asia	Eastern Asia	Ulsan power station	1			300	operating	1995		CC	LNG					Korea East-West Power Co Ltd [100.0%]	Korea Electric Power Corp [100.0%]	35.477	129.383	exact	Ulsan			Ulsan	https://www.gem.wiki/Ulsan_power_station	L100000401401	G100000401403	KR7015760002	1	1998		29	2035	2075	2115	300	300	300	300	300	300	300	300	300	300	300	300
oil/gas	South Korea	Asia	Eastern Asia	Ulsan power station	2			450	operating	1997		CC	LNG					Korea East-West Power Co Ltd [100.0%]	Korea Electric Power Corp [100.0%]	35.477	129.383	exact	Ulsan			Ulsan	https://www.gem.wiki/Ulsan_power_station	L100000401401	G100000401404	KR7015760002	1	1998		27	2037	2077	2117	450	450	450	450	450	450	450	450	450	450	450	450
oil/gas	South Korea	Asia	Eastern Asia	Ulsan power station	3			300	operating	1997		CC	LNG					Korea East-West Power Co Ltd [100.0%]	Korea Electric Power Corp [100.0%]	35.477	129.383	exact	Ulsan			Ulsan	https://www.gem.wiki/Ulsan_power_station	L100000401401	G100000412613	KR7015760002	1	1998		27	2037	2077	2117	300	300	300	300	300	300	300	300	300	300	300	300
oil/gas	South Korea	Asia	Eastern Asia	Ulsan power station	4			948	operating	2014		CC	LNG					Korea East-West Power Co Ltd [100.0%]	Korea Electric Power Corp [100.0%]	35.477	129.383	exact	Ulsan			Ulsan	https://www.gem.wiki/Ulsan_power_station	L100000401401	G100000401402	KR7015760002	1	1998	1998	10	2054	2094	2134	948	948	948	948	948	948	948	948	948	948	948	948
oil/gas	South Korea	Asia	Eastern Asia	Yeongheung power station	1		Yonghungdo	800	announced	2034		not found	LNG					Korea South-East Power Co Ltd [100.0%]	Korea Electric Power Corp [100.0%]	37.2369	126.436	exact	Oe-ri	Yeongheung	Ongjin	Incheon	https://www.gem.wiki/Yeongheung_power_station	L100000103466	G100000406170	KR7015760002	1	6680		-10	2074	2114	2154	0	0	0	0	0	0	0	0	0	0	0	0
oil/gas	South Korea	Asia	Eastern Asia	Yeongheung power station	2		Yonghungdo	800	announced	2034		not found	LNG					Korea South-East Power Co Ltd [100.0%]	Korea Electric Power Corp [100.0%]	37.2369	126.436	exact	Oe-ri	Yeongheung	Ongjin	Incheon	https://www.gem.wiki/Yeongheung_power_station	L100000103466	G100000406171	KR7015760002	1	6680	6680	-10	2074	2114	2154	0	0	0	0	0	0	0	0	0	0	0	0
oil/gas	South Korea	Asia	Eastern Asia	Yeongnam power station	1	영남파워		476	operating	2018		CC	NG					KOSPO YoungNam Power Co Ltd [100.0%]	Korea Electric Power Corp [50.0%]	35.514	129.383	exact	Nam-gu			Ulsan	https://www.gem.wiki/Yeongnam_power_station	L100000401413	G100000401414	KR7015760002	0.5	476	476	6	2058	2098	2138	238	238	238	238	238	238	238	238	238	238	238	238
oil/gas	South Korea	Asia	Eastern Asia	Yeongwol power station	1		Yong-Wol	848	operating	2010		CC	LNG					Korea Southern Power Co Ltd [100.0%]	Korea Electric Power Corp [100.0%]	37.1629	128.492	exact	Youngwol-si			Gyeongsangbuk-do	https://www.gem.wiki/Yeongwol_power_station	L100000401405	G100000401406	KR7015760002	1	848	848	14	2050	2090	2130	848	848	848	848	848	848	848	848	848	848	848	848
solar	United States	Americas	Northern America	Astoria solar farm	1		RE Astoria 1	100	operating	2016		PV						KEPCO		34.8442	-118.459	exact		Kern County		California	https://gem.wiki/Astoria_solar_farm	L804724	G805444	KR7015760002	1	175		8	2056	2096	2136	100	100	100	100	100	100	100	100	100	100	100	100
solar	United States	Americas	Northern America	Astoria solar farm	2		RE Astoria 2	75	operating	2016		PV						KEPCO		34.8366	-118.48	exact		Kern County		California	https://gem.wiki/Astoria_solar_farm	L804724	G805443	KR7015760002	1	175	175	8	2056	2096	2136	75	75	75	75	75	75	75	75	75	75	75	75
solar	United States	Americas	Northern America	Barren Ridge solar farm			RE Cinco Project, RE Barren Ridge	60	operating	2016		PV						KEPCO		35.2047	-118.069	exact		Kern County		California	https://gem.wiki/Barren_Ridge_solar_farm	L804725	G805445	KR7015760002	1	60	60	8	2056	2096	2136	60	60	60	60	60	60	60	60	60	60	60	60
solar	United States	Americas	Northern America	Cogentrix Of Alamosa solar farm			Alamosa Substation	30	operating	2012		PV						KEPCO		37.5986	-105.956	exact		Alamosa County		Colorado	https://gem.wiki/Cogentrix_Of_Alamosa_solar_farm	L804571	G805256	KR7015760002	1	30	30	12	2052	2092	2132	30	30	30	30	30	30	30	30	30	30	30	30
solar	Mexico	Americas	Latin America and the Caribbean	El Mayo Photovoltaic solar farm		Granja Solar Fotovoltaica El Mayo		126	operating	2021		PV						Korea Electric Power CORP (KEPCO); Sprott Korea		26.887	-109.362	exact		El Mayo	Hermosillo	Sonora	https://gem.wiki/El_Mayo_Photovoltaic_solar_farm	L807303	G808681	KR7015760002	0.5	126	126	3	2061	2101	2141	0	63	63	63	63	63	63	63	63	63	63	63
solar	Mexico	Americas	Latin America and the Caribbean	Horus Photovoltaic solar farm		Granja Solar Fotovoltaica Horus		119	operating	2023		PV						Korea Electric Power CORP (KEPCO); Sprott Korea		22.099	-102.32	exact			Pabellon De Arteaga	Aguascalientes	https://gem.wiki/Horus_Photovoltaic_solar_farm	L807304	G808682	KR7015760002	0.5	119	119	1	2063	2103	2143	0	0	0	59.5	59.5	59.5	59.5	59.5	59.5	59.5	59.5	59.5
solar	Guam	Oceania	Micronesia	Mangilao solar farm				60	operating	2022		PV						Korea Electric Power CORP (KEPCO); Foss and CO		13.4891	144.861	exact		Mangilao Municipality		Guam	https://gem.wiki/Mangilao_solar_farm	L805602	G806445	KR7015760002	0.5	60	60	2	2062	2102	2142	0	0	30	30	30	30	30	30	30	30	30	30
solar	Japan	Asia	Eastern Asia	Shin Chitose Kashiwadai Solar Power Plant		新千歳柏台太陽光発電所	Shin-Chitose Kashiwadai, LSIS Shin Chitose megasolar PV Park, New Chitose Kashiwadai Solar Power Plant	28	operating	2017		PV						Japan's Energy Products Corporation; Korea Electric Power CORP (KEPCO)		42.8033	141.686	exact	Chitose				https://gem.wiki/Shin_Chitose_Kashiwadai_Solar_Power_Plant	L801373	G801577	KR7015760002	0.5	28	28	7	2057	2097	2137	14	14	14	14	14	14	14	14	14	14	14	14
solar	Mexico	Americas	Latin America and the Caribbean	Tastiota Photovoltaic solar farm		Granja Solar Fotovoltaica Tastiota		125	operating	2021		PV						Korea Electric Power CORP (KEPCO); Sprott Korea		28.3495	-111.341	exact		Tastiota	Hermosillo	Sonora	https://gem.wiki/Tastiota_Photovoltaic_solar_farm	L807305	G808683	KR7015760002	0.5	125	125	3	2061	2101	2141	0	62.5	62.5	62.5	62.5	62.5	62.5	62.5	62.5	62.5	62.5	62.5
wind	Jordan	Asia	Western Asia	Fujeij wind farm			Fujeiji	89	operating	2019		onshore						KEPCO		30.5604	35.63	exact		Busayra Sub-District	Busayra District	Tafilah	https://gem.wiki/Fujeij_wind_farm	L905928	G908107	KR7015760002	1	89	89	5	2059	2099	2139	89	89	89	89	89	89	89	89	89	89	89	89
wind	South Korea	Asia	Eastern Asia	Gyeongbuk wind farm			Gyeongbuk Demonstration Complex Offshore Wind Farm	200	shelved			offshore mount unknown						Gyeongbuk Technopark; Gyeonbuk Province; Korea Hydro & Nuclear Power (KHNP) CO LTD; Korea Electric Power CORP (KEPCO); Korea Institute of Energy Research		36.421	129.442	approximate		Yeongdeok-gun		North Gyeongsang Province	https://gem.wiki/Gyeongbuk_wind_farm	L900917	G901050	KR7015760002	0.2	200	200	-99	40	80	120	0	0	0	0	0	0	0	0	0	0	0	0
wind	South Korea	Asia	Eastern Asia	Jeju Hanlim wind farm			Hallym Wind Farm, Hallym Offshore Wind Power Demonstration Offshore Wind Farm, Hanrim-eup	100	construction	2024		offshore mount unknown						Korea Midland Power CO LTD (KOMIPO); Korea Electric Power CORP (KEPCO); KEPCO Engineering & Construction Company INC; Hyundai Engineering & Construction CO LTD		33.4454	126.254	approximate	Hanlim-eup			Jeju Province	https://gem.wiki/Jeju_Hanlim_wind_farm	L900750	G900858	KR7015760002	0.25	100	100	0	2064	2104	2144	0	0	0	0	25	25	25	25	25	25	25	25
wind	South Korea	Asia	Eastern Asia	Sinan (KEPCO) Wind Farm	1		Sinan - Kepco	1500	pre-construction			offshore mount unknown						Korea Electric Power CORP (KEPCO); Jeonnam Development CORP		34.963	126.002	approximate	Jaeun-myeon	Sinan-gun		South Jeolla Province	https://gem.wiki/Sinan_(KEPCO)_Wind_Farm	L900931	G901065	KR7015760002	0.5	1500	1500	-99	40	80	120	0	0	0	0	0	0	0	0	0	750	750	750
wind	South Korea	Asia	Eastern Asia	Southwest Offshore wind farm	2		Seonam Offshore Wind Farm	460	pre-construction	2027		offshore hard mount						Korea Offshore Wind Power (KOWP); Korea Electric Power CORP (KEPCO) [25%]; other		35.5382	126.223	approximate		Gochang-gun		North Jeolla Province	https://gem.wiki/Southwest_Offshore_wind_farm	L900748	G901079	KR7015760002	0.333333	2460		-3	2067	2107	2147	0	0	0	0	0	0	0	153.333	153.333	153.333	153.333	153.333
wind	South Korea	Asia	Eastern Asia	Southwest Offshore wind farm	3		Southwest Offshore - phase 3 Offshore Wind Farm	2000	pre-construction	2027		offshore mount unknown						Korea East-West Power CO LTD; Korea Electric Power CORP (KEPCO); Korea Hydro & Nuclear Power (KHNP) CO LTD; Korea South-East Power CO LTD (KOEN); Korea Midland Power CO LTD (KOMIPO); Korea Southern Power CO LTD; Korea Western Power CO LTD		35.5909	126.223	approximate		Gochang-gun		North Jeolla Province	https://gem.wiki/Southwest_Offshore_wind_farm	L900748	G901080	KR7015760002	0.142857	2460	2460	-3	2067	2107	2147	0	0	0	0	0	0	0	285.714	285.714	285.714	285.714	285.714
wind	South Korea	Asia	Eastern Asia	Yeongwol wind farm			Yeongwol Eco Wind	46	construction	2023		onshore						Korea Electric Power CORP (KEPCO); E1 CORP		37.2422	128.384	approximate		Yeongwol-gun		Gangwon Province	https://gem.wiki/Yeongwol_wind_farm	L916889	G920959	KR7015760002	0.5	46	46	1	2063	2103	2143	0	0	0	23	23	23	23	23	23	23	23	23
																																					TOTAL Capacity	60024.8	60782.4	62361	63415.2	63322.2	66308.2	67866.9	68456.9	68256.9	69800.6	69300.6	69300.6
																																					Coal	36622.5	37254.6	38216.2	38771.9	37651.9	36651.9	35151.9	34151.9	31951.9	30451.9	29451.9	28451.9
																																					Oil&Gas	3093.01	3093.01	3680.01	3826.01	4198.01	4198.01	5075.68	5169.43	5169.43	5263.18	5263.18	5263.18
																																					LNG	19941.3	19941.3	19941.3	20211.3	21961.3	26947.3	30628.3	32685.5	36885.5	40585.5	42085.5	44085.5
																																					Fossil fuel	59656.8	60288.9	61837.5	62809.2	63811.2	67797.2	70855.9	72006.8	74006.8	76300.6	76800.6	77800.6
																																					Renewables	368	493.5	523.5	606	631	631	631	1070.05	1070.05	1820.05	1820.05	1820.05
																																					Oil	286.9	286.9	286.9	286.9	286.9	286.9	286.9	286.9	286.9	286.9	286.9	286.9
																																					Gas	23034.3	23034.3	23621.3	24037.3	25039.3	29025.3	32084	33234.9	35234.9	37528.7	38028.7	39028.7
																																					Nuclear	0	0	0	0	0	0	0	0	0	0	0	0
																																					Wind	89	89	89	112	137	137	137	576.048	576.048	1326.05	1326.05	1326.05
																																					solar	279	404.5	434.5	494	494	494	494	494	494	494	494	494
[truncated: 19 more columns]

## Sheet: KEPCO_fossilfuel
Type	Country/area	Region	Subregion	Plant / Project name	Unit / Phase name	Plant / Project name (local)	Plant / Project name (other)	Capacity (MW)	Status	Start year	Retired year	Technology	Fuel	Country/area 1 (hydropower only)	Country/area 2 (hydropower only)	Country/area 1 Capacity (MW) (hydropower only)	Country/area 2 Capacity (MW) (hydropower only)	Owner	Parent	Latitude	Longitude	Location accuracy	City	Local area (taluk, county)	Major area (prefecture, district)	Subnational unit (state, province)	GEM.Wiki URL	GEM location ID	GEM unit/phase ID	CompISIN	Ownership	Plant capacity	Plant capacity	Age	Reinvestment year	Reinvestment year	Reinvestment year	Coal capacity factor 2020	Gas capacity factor 2020	Oil capacity factor 2020	Coal capacity factor 2021	Gas capacity factor 2021	Oil capacity factor 2021	Coal capacity factor 2022	Gas capacity factor 2022	Oil capacity factor 2022	Coal capacity factor 2023	Gas capacity factor 2023	Oil capacity factor 2023
coal	South Korea	Asia	Eastern Asia	Anin power station	Unit 1	강릉 안인	Gnagneung, Gangnung Anin, Gangreung Anin, 강릉 안인	1040	operating	2022	2052	ultra-supercritical	unknown					Gangneung Eco Power [100%]	other unknown/mixed entity types [42.0%]; Korea Electric Power Corp [29.0%]; Samsung C&T Corp [29.0%]	37.7332	128.979	exact	Gangneung			Gangwon	https://www.gem.wiki/Anin_power_station	L100000103457	G100000100246	KR7015760002	0.29	2080		2	2062	2102	2142	0.59752	0	0	0.604519	0	0	0.575951	0	0	0.532	0	0
coal	South Korea	Asia	Eastern Asia	Anin power station	Unit 2	강릉 안인	Gnagneung, Gangnung Anin, Gangreung Anin, 강릉 안인	1040	operating	2023	2052	ultra-supercritical	unknown					Gangneung Eco Power [100%]	other unknown/mixed entity types [42.0%]; Korea Electric Power Corp [29.0%]; Samsung C&T Corp [29.0%]	37.7332	128.979	exact	Gangneung			Gangwon	https://www.gem.wiki/Anin_power_station	L100000103457	G100000100247	KR7015760002	0.29	2080	2080	1	2063	2103	2143	0.59752	0	0	0.604519	0	0	0.575951	0	0	0.532	0	0
coal	South Korea	Asia	Eastern Asia	Boryeong power station	Unit 5	보령 발전소	Poryong power station, 보령 발전소	500	operating	1993	2026	supercritical	bituminous					Korea Midland Power [100%]	Korea Electric Power Corp [100.0%]	36.4009	126.491	exact	Poryong-gun	Ocheon	Poryong	South Chungcheong	https://www.gem.wiki/Boryeong_power_station	L100000103477	G100000109273	KR7015760002	1	5400		31	2033	2073	2113	0.59752	0	0	0.604519	0	0	0.575951	0	0	0.532	0	0
coal	South Korea	Asia	Eastern Asia	Boryeong power station	Unit 3	보령 발전소	Poryong power station, 보령 발전소	550	operating	1993	2043	supercritical	bituminous					Korea Midland Power [100%]	Korea Electric Power Corp [100.0%]	36.4009	126.491	exact	Poryong-gun	Ocheon	Poryong	South Chungcheong	https://www.gem.wiki/Boryeong_power_station	L100000103477	G100000109271	KR7015760002	1	5400		31	2033	2073	2113	0.59752	0	0	0.604519	0	0	0.575951	0	0	0.532	0	0
coal	South Korea	Asia	Eastern Asia	Boryeong power station	Unit 4	보령 발전소	Poryong power station, 보령 발전소	500	operating	1993	2043	supercritical	bituminous					Korea Midland Power [100%]	Korea Electric Power Corp [100.0%]	36.4009	126.491	exact	Poryong-gun	Ocheon	Poryong	South Chungcheong	https://www.gem.wiki/Boryeong_power_station	L100000103477	G100000109272	KR7015760002	1	5400		31	2033	2073	2113	0.59752	0	0	0.604519	0	0	0.575951	0	0	0.532	0	0
coal	South Korea	Asia	Eastern Asia	Boryeong power station	Unit 6	보령 발전소	Poryong power station, 보령 발전소	500	operating	1994	2026	supercritical	bituminous					Korea Midland Power [100%]	Korea Electric Power Corp [100.0%]	36.4009	126.491	exact	Poryong-gun	Ocheon	Poryong	South Chungcheong	https://www.gem.wiki/Boryeong_power_station	L100000103477	G100000109274	KR7015760002	1	5400		30	2034	2074	2114	0.59752	0	0	0.604519	0	0	0.575951	0	0	0.532	0	0
coal	South Korea	Asia	Eastern Asia	Boryeong power station	Unit 7	보령 발전소	Poryong power station, 보령 발전소	500	operating	2008	2038	ultra-supercritical	bituminous					Korea Midland Power [100%]	Korea Electric Power Corp [100.0%]	36.4009	126.491	exact	Poryong-gun	Ocheon	Poryong	South Chungcheong	https://www.gem.wiki/Boryeong_power_station	L100000103477	G100000109275	KR7015760002	1	5400		16	2048	2088	2128	0.59752	0	0	0.604519	0	0	0.575951	0	0	0.532	0	0
coal	South Korea	Asia	Eastern Asia	Boryeong power station	Unit 8	보령 발전소	Poryong power station, 보령 발전소	500	operating	2008	2038	ultra-supercritical	bituminous					Korea Midland Power [100%]	Korea Electric Power Corp [100.0%]	36.4009	126.491	exact	Poryong-gun	Ocheon	Poryong	South Chungcheong	https://www.gem.wiki/Boryeong_power_station	L100000103477	G100000109276	KR7015760002	1	5400	5400	16	2048	2088	2128	0.59752	0	0	0.604519	0	0	0.575951	0	0	0.532	0	0
coal	South Korea	Asia	Eastern Asia	Bukpyung power station	Unit 1	북평화력	Buk-Pyeong power station; GS Donghae power station, 북평화력	595	operating	2017	2047	supercritical	anthracite					ST International; Korea East-West Power	Korea Electric Power Corp; ST International	37.4805	129.143	exact	Donghae			Gangwon	https://www.gem.wiki/Bukpyung_power_station	L100000103458	G100000101094	KR7015760002	0.5	1190		7	2057	2097	2137	0.59752	0	0	0.604519	0	0	0.575951	0	0	0.532	0	0
coal	South Korea	Asia	Eastern Asia	Bukpyung power station	Unit 2	북평화력	Buk-Pyeong power station; GS Donghae power station, 북평화력	595	operating	2017	2047	supercritical	anthracite					ST International; Korea East-West Power	Korea Electric Power Corp; ST International	37.4805	129.143	exact	Donghae			Gangwon	https://www.gem.wiki/Bukpyung_power_station	L100000103458	G100000101095	KR7015760002	0.5	1190	1190	7	2057	2097	2137	0.59752	0	0	0.604519	0	0	0.575951	0	0	0.532	0	0
coal	Indonesia	Asia	South-eastern Asia	Cirebon power station	Unit 1		井里汶电站	660	operating	2012	2037	supercritical	unknown					PT Cirebon Electric Power [100%]	Marubeni Corp [32.5%]; Korea Electric Power Corp [27.5%]; PT Indika Energy Tbk [20.0%]; ST International Corp [20.0%]	-6.77029	108.615	exact	Kanci Kulon	Astanajapura	Cirebon	West Java	https://www.gem.wiki/Cirebon_power_station	L100000102814	G100000101590	KR7015760002	0.275	1584		12	2052	2092	2132	0.59752	0	0	0.604519	0	0	0.575951	0	0	0.532	0	0
coal	Indonesia	Asia	South-eastern Asia	Cirebon power station	Unit 2		井里汶电站	924	operating	2023		ultra-supercritical	unknown					PT Cirebon Electric Power [100%]	Marubeni Corp [32.5%]; Korea Electric Power Corp [27.5%]; PT Indika Energy Tbk [20.0%]; ST International Corp [20.0%]	-6.77029	108.615	exact	Kanci Kulon	Astanajapura	Cirebon	West Java	https://www.gem.wiki/Cirebon_power_station	L100000102814	G100000101591	KR7015760002	0.275	1584	1584	1	2063	2103	2143	0.59752	0	0	0.604519	0	0	0.575951	0	0	0.532	0	0
coal	South Korea	Asia	Eastern Asia	Dangjin power station	Unit 1	당진 발전소	당진 발전소	500	operating	1999	2029	supercritical	bituminous					Korea East-West Power [100%]	Korea Electric Power Corp [100.0%]	37.0551	126.512	exact	Gyoro	Seokmun	Dangjin	South Chungcheong	https://www.gem.wiki/Dangjin_power_station	L100000103480	G100000101952	KR7015760002	1	6040		25	2039	2079	2119	0.59752	0	0	0.604519	0	0	0.575951	0	0	0.532	0	0
coal	South Korea	Asia	Eastern Asia	Dangjin power station	Unit 2	당진 발전소	당진 발전소	500	operating	1999	2029	supercritical	bituminous					Korea East-West Power [100%]	Korea Electric Power Corp [100.0%]	37.0551	126.512	exact	Gyoro	Seokmun	Dangjin	South Chungcheong	https://www.gem.wiki/Dangjin_power_station	L100000103480	G100000101954	KR7015760002	1	6040		25	2039	2079	2119	0.59752	0	0	0.604519	0	0	0.575951	0	0	0.532	0	0
coal	South Korea	Asia	Eastern Asia	Dangjin power station	Unit 3	당진 발전소	당진 발전소	500	operating	2000	2030	supercritical	bituminous					Korea East-West Power [100%]	Korea Electric Power Corp [100.0%]	37.0551	126.512	exact	Gyoro	Seokmun	Dangjin	South Chungcheong	https://www.gem.wiki/Dangjin_power_station	L100000103480	G100000101955	KR7015760002	1	6040		24	2040	2080	2120	0.59752	0	0	0.604519	0	0	0.575951	0	0	0.532	0	0
coal	South Korea	Asia	Eastern Asia	Dangjin power station	Unit 4	당진 발전소	당진 발전소	500	operating	2001	2030	supercritical	bituminous					Korea East-West Power [100%]	Korea Electric Power Corp [100.0%]	37.0551	126.512	exact	Gyoro	Seokmun	Dangjin	South Chungcheong	https://www.gem.wiki/Dangjin_power_station	L100000103480	G100000101956	KR7015760002	1	6040		23	2041	2081	2121	0.59752	0	0	0.604519	0	0	0.575951	0	0	0.532	0	0
coal	South Korea	Asia	Eastern Asia	Dangjin power station	Unit 5	당진 발전소	당진 발전소	500	operating	2005	2035	ultra-supercritical	bituminous					Korea East-West Power [100%]	Korea Electric Power Corp [100.0%]	37.0551	126.512	exact	Gyoro	Seokmun	Dangjin	South Chungcheong	https://www.gem.wiki/Dangjin_power_station	L100000103480	G100000101957	KR7015760002	1	6040		19	2045	2085	2125	0.59752	0	0	0.604519	0	0	0.575951	0	0	0.532	0	0
coal	South Korea	Asia	Eastern Asia	Dangjin power station	Unit 6	당진 발전소	당진 발전소	500	operating	2006	2036	ultra-supercritical	bituminous					Korea East-West Power [100%]	Korea Electric Power Corp [100.0%]	37.0551	126.512	exact	Gyoro	Seokmun	Dangjin	South Chungcheong	https://www.gem.wiki/Dangjin_power_station	L100000103480	G100000101958	KR7015760002	1	6040		18	2046	2086	2126	0.59752	0	0	0.604519	0	0	0.575951	0	0	0.532	0	0
coal	South Korea	Asia	Eastern Asia	Dangjin power station	Unit 7	당진 발전소	당진 발전소	500	operating	2007	2037	ultra-supercritical	bituminous					Korea East-West Power [100%]	Korea Electric Power Corp [100.0%]	37.0551	126.512	exact	Gyoro	Seokmun	Dangjin	South Chungcheong	https://www.gem.wiki/Dangjin_power_station	L100000103480	G100000101959	KR7015760002	1	6040		17	2047	2087	2127	0.59752	0	0	0.604519	0	0	0.575951	0	0	0.532	0	0
coal	South Korea	Asia	Eastern Asia	Dangjin power station	Unit 8	당진 발전소	당진 발전소	500	operating	2007	2037	ultra-supercritical	bituminous					Korea East-West Power [100%]	Korea Electric Power Corp [100.0%]	37.0551	126.512	exact	Gyoro	Seokmun	Dangjin	South Chungcheong	https://www.gem.wiki/Dangjin_power_station	L100000103480	G100000101960	KR7015760002	1	6040		17	2047	2087	2127	0.59752	0	0	0.604519	0	0	0.575951	0	0	0.532	0	0
coal	South Korea	Asia	Eastern Asia	Dangjin power station	Unit 9	당진 발전소	당진 발전소	1020	operating	2016	2045	ultra-supercritical	bituminous					Korea East-West Power [100%]	Korea Electric Power Corp [100.0%]	37.0551	126.512	exact	Dangjin			South Chungcheong	https://www.gem.wiki/Dangjin_power_station	L100000103480	G100000101961	KR7015760002	1	6040		8	2056	2096	2136	0.59752	0	0	0.604519	0	0	0.575951	0	0	0.532	0	0
coal	South Korea	Asia	Eastern Asia	Dangjin power station	Unit 10	당진 발전소	당진 발전소	1020	operating	2016	2046	ultra-supercritical	bituminous					Korea East-West Power [100%]	Korea Electric Power Corp [100.0%]	37.0551	126.512	exact	Gyoro	Seokmun	Dangjin	South Chungcheong	https://www.gem.wiki/Dangjin_power_station	L100000103480	G100000101953	KR7015760002	1	6040	6040	8	2056	2096	2136	0.59752	0	0	0.604519	0	0	0.575951	0	0	0.532	0	0
coal	South Korea	Asia	Eastern Asia	Donghae power station	Unit 1	동해 발전소	East Sea power station, 동해 발전소	200	operating	1998	2028	subcritical	anthracite					Korea East-West Power [100%]	Korea Electric Power Corp [100.0%]	37.4863	129.147	exact	Donghae		Donghae	Gangwon	https://www.gem.wiki/Donghae_power_station	L100000103460	G100000102425	KR7015760002	1	400		26	2038	2078	2118	0.59752	0	0	0.604519	0	0	0.575951	0	0	0.532	0	0
coal	South Korea	Asia	Eastern Asia	Donghae power station	Unit 2	동해 발전소	East Sea power station, 동해 발전소	200	operating	1999	2029	subcritical	anthracite					Korea East-West Power [100%]	Korea Electric Power Corp [100.0%]	37.4863	129.147	exact	Donghae		Donghae	Gangwon	https://www.gem.wiki/Donghae_power_station	L100000103460	G100000102426	KR7015760002	1	400	400	25	2039	2079	2119	0.59752	0	0	0.604519	0	0	0.575951	0	0	0.532	0	0
coal	South Korea	Asia	Eastern Asia	Goseong Green power station	Unit 1	고성그린파워	Goseong Hi, Goseung Hai, Goseong High, 고성그린파워	1040	operating	2021	2051	ultra-supercritical	unknown					Goseong Green Power [100%]	other unknown/mixed entity types [52.0%]; Korea Electric Power Corp [29.0%]; SK Gas Co Ltd [19.0%]	34.9049	128.125	exact	Hai-myeon	Geumseong	Hadong	South Gyeongsang	https://www.gem.wiki/Goseong_Green_power_station	L100000103484	G100000103106	KR7015760002	0.29	2080		3	2061	2101	2141	0.59752	0	0	0.604519	0	0	0.575951	0	0	0.532	0	0
coal	South Korea	Asia	Eastern Asia	Goseong Green power station	Unit 2	고성그린파워	Goseong Hi, Goseung Hai, Goseong High, 고성그린파워	1040	operating	2021	2051	ultra-supercritical	unknown					Goseong Green Power [100%]	other unknown/mixed entity types [52.0%]; Korea Electric Power Corp [29.0%]; SK Gas Co Ltd [19.0%]	34.9049	128.125	exact	Hai-myeon	Geumseong	Hadong	South Gyeongsang	https://www.gem.wiki/Goseong_Green_power_station	L100000103484	G100000103107	KR7015760002	0.29	2080	2080	3	2061	2101	2141	0.59752	0	0	0.604519	0	0	0.575951	0	0	0.532	0	0
coal	South Korea	Asia	Eastern Asia	Hadong power station	Unit 1	하동 발전소	하동 발전소	500	operating	1997	2026	supercritical	bituminous					Korea Southern Power [100%]	Korea Electric Power Corp [100.0%]	34.9524	127.82	exact	Gadeok	Geumseong	Hadong	South Gyeongsang	https://www.gem.wiki/Hadong_power_station	L100000103485	G100000103526	KR7015760002	1	7000		27	2037	2077	2117	0.59752	0	0	0.604519	0	0	0.575951	0	0	0.532	0	0
coal	South Korea	Asia	Eastern Asia	Hadong power station	Unit 2	하동 발전소	하동 발전소	500	operating	1997	2027	supercritical	bituminous					Korea Southern Power [100%]	Korea Electric Power Corp [100.0%]	34.9524	127.82	exact	Gadeok	Geumseong	Hadong	South Gyeongsang	https://www.gem.wiki/Hadong_power_station	L100000103485	G100000103527	KR7015760002	1	7000		27	2037	2077	2117	0.59752	0	0	0.604519	0	0	0.575951	0	0	0.532	0	0
coal	South Korea	Asia	Eastern Asia	Hadong power station	Unit 3	하동 발전소	하동 발전소	500	operating	1998	2028	supercritical	bituminous					Korea Southern Power [100%]	Korea Electric Power Corp [100.0%]	34.9524	127.82	exact	Gadeok	Geumseong	Hadong	South Gyeongsang	https://www.gem.wiki/Hadong_power_station	L100000103485	G100000103528	KR7015760002	1	7000		26	2038	2078	2118	0.59752	0	0	0.604519	0	0	0.575951	0	0	0.532	0	0
coal	South Korea	Asia	Eastern Asia	Hadong power station	Unit 4	하동 발전소	하동 발전소	500	operating	1999	2028	supercritical	bituminous					Korea Southern Power [100%]	Korea Electric Power Corp [100.0%]	34.9524	127.82	exact	Gadeok	Geumseong	Hadong	South Gyeongsang	https://www.gem.wiki/Hadong_power_station	L100000103485	G100000103529	KR7015760002	1	7000		25	2039	2079	2119	0.59752	0	0	0.604519	0	0	0.575951	0	0	0.532	0	0
coal	South Korea	Asia	Eastern Asia	Hadong power station	Unit 5	하동 발전소	하동 발전소	500	operating	2000	2031	supercritical	bituminous					Korea Southern Power [100%]	Korea Electric Power Corp [100.0%]	34.9524	127.82	exact	Gadeok	Geumseong	Hadong	South Gyeongsang	https://www.gem.wiki/Hadong_power_station	L100000103485	G100000103530	KR7015760002	1	7000		24	2040	2080	2120	0.59752	0	0	0.604519	0	0	0.575951	0	0	0.532	0	0
coal	South Korea	Asia	Eastern Asia	Hadong power station	Unit 6	하동 발전소	하동 발전소	500	operating	2001	2031	supercritical	bituminous					Korea Southern Power [100%]	Korea Electric Power Corp [100.0%]	34.9524	127.82	exact	Gadeok	Geumseong	Hadong	South Gyeongsang	https://www.gem.wiki/Hadong_power_station	L100000103485	G100000103531	KR7015760002	1	7000		23	2041	2081	2121	0.59752	0	0	0.604519	0	0	0.575951	0	0	0.532	0	0
coal	South Korea	Asia	Eastern Asia	Hadong power station	Unit 7	하동 발전소	하동 발전소	500	operating	2008	2038	ultra-supercritical	bituminous					Korea Southern Power [100%]	Korea Electric Power Corp [100.0%]	34.9524	127.82	exact	Gadeok	Geumseong	Hadong	South Gyeongsang	https://www.gem.wiki/Hadong_power_station	L100000103485	G100000103532	KR7015760002	1	7000		16	2048	2088	2128	0.59752	0	0	0.604519	0	0	0.575951	0	0	0.532	0	0
coal	South Korea	Asia	Eastern Asia	Hadong power station	Unit 8	하동 발전소	하동 발전소	500	operating	2009	2039	ultra-supercritical	bituminous					Korea Southern Power [100%]	Korea Electric Power Corp [100.0%]	34.9524	127.82	exact	Gadeok	Geumseong	Hadong	South Gyeongsang	https://www.gem.wiki/Hadong_power_station	L100000103485	G100000103533	KR7015760002	1	7000	7000	15	2049	2089	2129	0.59752	0	0	0.604519	0	0	0.575951	0	0	0.532	0	0
coal	China	Asia	Eastern Asia	High River power station	Unit 1	潞安长子高河低热值煤电厂		660	operating	2021		ultra-supercritical	waste coal					Shanxi Luguang Power Generation [100%]	An Hui Wenergy Co Ltd [50.0%]; Shanxi State-Owned Capital Investment and Operation Co Ltd [21.2%]; KEPCO Shanxi International [17.0%]; KEPCO Woori sprott Global Prive [4.0%]; Power Development [3.5%]; Shanxi Gemeng International Energy Group Co Ltd [2.4%]; other [2.0%]	36.1651	112.962	exact	Gaohe	Changzi	Changzhi	Shanxi	https://www.gem.wiki/High_River_power_station	L100000101468	G100000103885	KR7015760002	0.17	1320		3	2061	2101	2141	0.59752	0	0	0.604519	0	0	0.575951	0	0	0.532	0	0
coal	China	Asia	Eastern Asia	High River power station	Unit 2	潞安长子高河低热值煤电厂		660	operating	2021		ultra-supercritical	waste coal					Shanxi Luguang Power Generation [100%]	An Hui Wenergy Co Ltd [50.0%]; Shanxi State-Owned Capital Investment and Operation Co Ltd [21.2%]; KEPCO Shanxi International [17.0%]; KEPCO Woori sprott Global Prive [4.0%]; Power Development [3.5%]; Shanxi Gemeng International Energy Group Co Ltd [2.4%]; other [2.0%]	36.1651	112.962	exact	Gaohe	Changzi	Changzhi	Shanxi	https://www.gem.wiki/High_River_power_station	L100000101468	G100000103886	KR7015760002	0.17	1320	1320	3	2061	2101	2141	0.59752	0	0	0.604519	0	0	0.575951	0	0	0.532	0	0
coal	South Korea	Asia	Eastern Asia	Honam power station	Unit 1	호남	호남 1 (Unit 1), 호남 2 (Unit 2)	250	retired	1973	2021	subcritical	bituminous					Korea East-West Power [100%]	Korea Electric Power Corp [100.0%]	34.8544	127.735	exact		Wolnae	Yeosu	North Jeolla	https://www.gem.wiki/Honam_power_station	L100000103472	G100000103929	KR7015760002	1	500		51	2013	2053	2093	0.59752	0	0	0.604519	0	0	0.575951	0	0	0.532	0	0
coal	South Korea	Asia	Eastern Asia	Honam power station	Unit 2	호남	호남 1 (Unit 1), 호남 2 (Unit 2)	250	retired	1973	2021	subcritical	bituminous					Korea East-West Power [100%]	Korea Electric Power Corp [100.0%]	34.8544	127.735	exact		Wolnae	Yeosu	North Jeolla	https://www.gem.wiki/Honam_power_station	L100000103472	G100000103930	KR7015760002	1	500	500	51	2013	2053	2093	0.59752	0	0	0.604519	0	0	0.575951	0	0	0.532	0	0
coal	China	Asia	Eastern Asia	Jiexiu Chongguang power station	Unit 1	山西国际能源介休崇光低热值煤电厂	Jiexiu Gangue power station	350	operating	2020		supercritical	waste coal					Shanxi Chongguang Power Generation [100%]	Shanxi Anyi Hongshan PORCELAIN Co Ltd [22.5%]; Jiexiu Yihong Investment Co Ltd [21.6%]; Shanxi State-Owned Capital Investment and Operation Co Ltd [21.6%]; KEPCO Shanxi International [17.3%]; Shanxi Ansheng Technology Development Co Ltd [4.9%]; KEPCO Woori sprott Global Prive [4.1%]; Power Development [3.6%]; Shanxi Gemeng International Energy Group Co Ltd [2.4%]; other [2.0%]	37.1065	111.996	exact	Yian Town	Jiexiu	Jinzhong	Shanxi	https://www.gem.wiki/Jiexiu_Chongguang_power_station	L100000101486	G100000105165	KR7015760002	0.173	700		4	2060	2100	2140	0.59752	0	0	0.604519	0	0	0.575951	0	0	0.532	0	0
coal	China	Asia	Eastern Asia	Jiexiu Chongguang power station	Unit 2	山西国际能源介休崇光低热值煤电厂	Jiexiu Gangue power station	350	operating	2021		supercritical	waste coal					Shanxi Chongguang Power Generation [100%]	Shanxi Anyi Hongshan PORCELAIN Co Ltd [22.5%]; Jiexiu Yihong Investment Co Ltd [21.6%]; Shanxi State-Owned Capital Investment and Operation Co Ltd [21.6%]; KEPCO Shanxi International [17.3%]; Shanxi Ansheng Technology Development Co Ltd [4.9%]; KEPCO Woori sprott Global Prive [4.1%]; Power Development [3.6%]; Shanxi Gemeng International Energy Group Co Ltd [2.4%]; other [2.0%]	37.1065	111.996	exact	Yian Town	Jiexiu	Jinzhong	Shanxi	https://www.gem.wiki/Jiexiu_Chongguang_power_station	L100000101486	G100000105166	KR7015760002	0.173	700		3	2061	2101	2141	0.59752	0	0	0.604519	0	0	0.575951	0	0	0.532	0	0
coal	China	Asia	Eastern Asia	Lingshi Qiguang power station	Unit 1	山西国际能源灵石启光低热值煤发电厂		350	operating	2019		supercritical	waste coal					Shanxi Qiguang Power Generation [100%]	Lingshi Deguangyi Investment and Trade Co Ltd [24.1%]; Lingshi Xinyuan Investment and Trade Co Ltd [24.1%]; Shanxi State-Owned Capital Investment and Operation Co Ltd [21.6%]; KEPCO Shanxi International [17.3%]; KEPCO Woori sprott Global Prive [4.1%]; Power Development [3.6%]; other [2.8%]; Shanxi Gemeng International Energy Group Co Ltd [2.4%]	36.8206	111.626	exact	Duanchun Town	Lingshi	Jinzhong	Shanxi	https://www.gem.wiki/Lingshi_Qiguang_power_station	L100000101492	G100000106307	KR7015760002	0.173	700		5	2059	2099	2139	0.59752	0	0	0.604519	0	0	0.575951	0	0	0.532	0	0
coal	China	Asia	Eastern Asia	Lingshi Qiguang power station	Unit 2	山西国际能源灵石启光低热值煤发电厂		350	operating	2019		supercritical	waste coal					Shanxi Qiguang Power Generation [100%]	Lingshi Deguangyi Investment and Trade Co Ltd [24.1%]; Lingshi Xinyuan Investment and Trade Co Ltd [24.1%]; Shanxi State-Owned Capital Investment and Operation Co Ltd [21.6%]; KEPCO Shanxi International [17.3%]; KEPCO Woori sprott Global Prive [4.1%]; Power Development [3.6%]; other [2.8%]; Shanxi Gemeng International Energy Group Co Ltd [2.4%]	36.8206	111.626	exact	Duanchun Town	Lingshi	Jinzhong	Shanxi	https://www.gem.wiki/Lingshi_Qiguang_power_station	L100000101492	G100000106308	KR7015760002	0.173	700	700	5	2059	2099	2139	0.59752	0	0	0.604519	0	0	0.575951	0	0	0.532	0	0
coal	Vietnam	Asia	South-eastern Asia	Nghi Son power station	Phase 2 Unit 1			660	operating	2022		supercritical	bituminous					Nghi Son 2 Power [100%]	Korea Electric Power Corp [50.0%]; Marubeni Corp [40.0%]; Tohoku Electric Power Co Inc [10.0%]	19.3158	105.8	exact	Nghi Son Economic Zone	Hai Ha	Tinh Gia	Thanh Hoa	https://www.gem.wiki/Nghi_Son_power_station	L100000104345	G100000107412	KR7015760002	0.5	1320		2	2062	2102	2142	0.59752	0	0	0.604519	0	0	0.575951	0	0	0.532	0	0
coal	Vietnam	Asia	South-eastern Asia	Nghi Son power station	Phase 2 Unit 2			660	operating	2022		supercritical	bituminous					Nghi Son 2 Power [100%]	Korea Electric Power Corp [50.0%]; Marubeni Corp [40.0%]; Tohoku Electric Power Co Inc [10.0%]	19.3158	105.8	exact	Nghi Son Economic Zone	Hai Ha	Tinh Gia	Thanh Hoa	https://www.gem.wiki/Nghi_Son_power_station	L100000104345	G100000107413	KR7015760002	0.5	1320	1320	2	2062	2102	2142	0.59752	0	0	0.604519	0	0	0.575951	0	0	0.532	0	0
coal	China	Asia	Eastern Asia	Pingshuo Gangue power station	Unit 3	山西国际能源平朔煤矸石发电厂		300	operating	2009		subcritical	waste coal					Shanxi Pingshuo Gangue Power Generation [100%]	China Coal Pingshuo Coal Industry [33.0%]; Shanxi State-Owned Capital Investment and Operation Co Ltd [28.3%]; KEPCO Shanxi International [22.8%]; KEPCO Woori sprott Global Prive [5.4%]; Power Development [4.7%]; Shanxi Gemeng International Energy Group Co Ltd [3.1%]; other [2.7%]	39.4728	112.323	exact	Pinglu	Pinglu	Shuozhou	Shanxi	https://www.gem.wiki/Pingshuo_Gangue_power_station	L100000101501	G100000108005	KR7015760002	0.228	600		15	2049	2089	2129	0.59752	0	0	0.604519	0	0	0.575951	0	0	0.532	0	0
coal	China	Asia	Eastern Asia	Pingshuo Gangue power station	Unit 4	山西国际能源平朔煤矸石发电厂		300	operating	2009		subcritical	waste coal					Shanxi Pingshuo Gangue Power Generation [100%]	China Coal Pingshuo Coal Industry [33.0%]; Shanxi State-Owned Capital Investment and Operation Co Ltd [28.3%]; KEPCO Shanxi International [22.8%]; KEPCO Woori sprott Global Prive [5.4%]; Power Development [4.7%]; Shanxi Gemeng International Energy Group Co Ltd [3.1%]; other [2.7%]	39.4728	112.323	exact	Pinglu	Pinglu	Shuozhou	Shanxi	https://www.gem.wiki/Pingshuo_Gangue_power_station	L100000101501	G100000108006	KR7015760002	0.228	600	600	15	2049	2089	2129	0.59752	0	0	0.604519	0	0	0.575951	0	0	0.532	0	0
coal	South Korea	Asia	Eastern Asia	Samcheok Green power station	Unit 1	삼척그린파워	삼척그린파워	1022	operating	2016	2046	ultra-supercritical	unknown					Korea Southern Power [100%]	Korea Electric Power Corp [100.0%]	37.186	129.342	exact	Hosan	Wondeok	Samcheok	Gangwon	https://www.gem.wiki/Samcheok_Green_power_station	L100000103463	G100000108757	KR7015760002	1	2044		8	2056	2096	2136	0.59752	0	0	0.604519	0	0	0.575951	0	0	0.532	0	0
coal	South Korea	Asia	Eastern Asia	Samcheok Green power station	Unit 2	삼척그린파워	삼척그린파워	1022	operating	2017	2047	ultra-supercritical	unknown					Korea Southern Power [100%]	Korea Electric Power Corp [100.0%]	37.186	129.342	exact	Hosan	Wondeok	Samcheok	Gangwon	https://www.gem.wiki/Samcheok_Green_power_station	L100000103463	G100000108758	KR7015760002	1	2044	2044	7	2057	2097	2137	0.59752	0	0	0.604519	0	0	0.575951	0	0	0.532	0	0
coal	South Korea	Asia	Eastern Asia	Samchonpo power station	Unit 1	삼천포 발전소	Samcheonpo power station, 삼천포 발전소	560	retired	1983	2021	subcritical	bituminous					Korea South-East Power [100%]	Korea Electric Power Corp [100.0%]	34.9107	128.108	exact	Deokho	Hai	Goseong	South Gyeongsang	https://www.gem.wiki/Samchonpo_power_station	L100000103487	G100000108759	KR7015760002	1	5360		41	2023	2063	2103	0.59752	0	0	0.604519	0	0	0.575951	0	0	0.532	0	0
coal	South Korea	Asia	Eastern Asia	Samchonpo power station	Unit 2	삼천포 발전소	Samcheonpo power station, 삼천포 발전소	560	retired	1984	2021	subcritical	bituminous					Korea South-East Power [100%]	Korea Electric Power Corp [100.0%]	34.9107	128.108	exact	Deokho	Hai	Goseong	South Gyeongsang	https://www.gem.wiki/Samchonpo_power_station	L100000103487	G100000108760	KR7015760002	1	5360		40	2024	2064	2104	0.59752	0	0	0.604519	0	0	0.575951	0	0	0.532	0	0
coal	South Korea	Asia	Eastern Asia	Samchonpo power station	Unit 3	삼천포 발전소	Samcheonpo power station, 삼천포 발전소	560	operating	1993	2024	subcritical	bituminous					Korea South-East Power [100%]	Korea Electric Power Corp [100.0%]	34.9107	128.108	exact	Deokho	Hai	Goseong	South Gyeongsang	https://www.gem.wiki/Samchonpo_power_station	L100000103487	G100000108761	KR7015760002	1	5360		31	2033	2073	2113	0.59752	0	0	0.604519	0	0	0.575951	0	0	0.532	0	0
coal	South Korea	Asia	Eastern Asia	Samchonpo power station	Unit 4	삼천포 발전소	Samcheonpo power station, 삼천포 발전소	560	operating	1994	2024	subcritical	bituminous					Korea South-East Power [100%]	Korea Electric Power Corp [100.0%]	34.9107	128.108	exact	Deokho	Hai	Goseong	South Gyeongsang	https://www.gem.wiki/Samchonpo_power_station	L100000103487	G100000108762	KR7015760002	1	5360		30	2034	2074	2114	0.59752	0	0	0.604519	0	0	0.575951	0	0	0.532	0	0
coal	South Korea	Asia	Eastern Asia	Samchonpo power station	Unit 5	삼천포 발전소	Samcheonpo power station, 삼천포 발전소	500	operating	1997	2027	supercritical	subbituminous					Korea South-East Power [100%]	Korea Electric Power Corp [100.0%]	34.9107	128.108	exact	Deokho	Hai	Goseong	South Gyeongsang	https://www.gem.wiki/Samchonpo_power_station	L100000103487	G100000108763	KR7015760002	1	5360		27	2037	2077	2117	0.59752	0	0	0.604519	0	0	0.575951	0	0	0.532	0	0
coal	South Korea	Asia	Eastern Asia	Samchonpo power station	Unit 6	삼천포 발전소	Samcheonpo power station, 삼천포 발전소	500	operating	1998	2028	supercritical	subbituminous					Korea South-East Power [100%]	Korea Electric Power Corp [100.0%]	34.9107	128.108	exact	Deokho	Hai	Goseong	South Gyeongsang	https://www.gem.wiki/Samchonpo_power_station	L100000103487	G100000108764	KR7015760002	1	5360	5360	26	2038	2078	2118	0.59752	0	0	0.604519	0	0	0.575951	0	0	0.532	0	0
coal	China	Asia	Eastern Asia	Shanxi Hepo power station	Unit 5	山西国际能源河坡发电厂		350	operating	2016		supercritical	unknown					Shanxi Hepo Power Generation [100%]	Shanxi State-Owned Capital Investment and Operation Co Ltd [39.6%]; KEPCO Shanxi International [31.8%]; KEPCO Woori sprott Global Prive [7.5%]; Power Development [6.5%]; Yangquan Economic and Trade Asset Operation Center [6.5%]; Shanxi Gemeng International Energy Group Co Ltd [4.4%]; other [3.7%]	37.9199	113.615	exact	Yingying Town Xiayan Villege Baiquan Industrial Park	Jiaoqu	Yangquan	Shanxi	https://www.gem.wiki/Shanxi_Hepo_power_station	L100000101509	G100000109047	KR7015760002	0.318	700		8	2056	2096	2136	0.59752	0	0	0.604519	0	0	0.575951	0	0	0.532	0	0
coal	China	Asia	Eastern Asia	Shanxi Hepo power station	Unit 6	山西国际能源河坡发电厂		350	operating	2016		supercritical	unknown					Shanxi Hepo Power Generation [100%]	Shanxi State-Owned Capital Investment and Operation Co Ltd [39.6%]; KEPCO Shanxi International [31.8%]; KEPCO Woori sprott Global Prive [7.5%]; Power Development [6.5%]; Yangquan Economic and Trade Asset Operation Center [6.5%]; Shanxi Gemeng International Energy Group Co Ltd [4.4%]; other [3.7%]	37.9199	113.615	exact	Yingying Town Xiayan Villege Baiquan Industrial Park	Jiaoqu	Yangquan	Shanxi	https://www.gem.wiki/Shanxi_Hepo_power_station	L100000101509	G100000109048	KR7015760002	0.318	700	700	8	2056	2096	2136	0.59752	0	0	0.604519	0	0	0.575951	0	0	0.532	0	0
coal	China	Asia	Eastern Asia	Shanxi Liulin power station	Phase I Unit 1	山西国际能源柳林发电厂	Liulin Liansheng power station, Liulin Huaguang power station (Phase I Unit 1, Phase I Unit 2), Liulin Huaguang power station 柳林华光热电厂 (Phase II Unit 3, Phase II Unit 4)	100	operating	1995		subcritical	unknown					Shanxi Liulin Electric Power [100%]	Shanxi State-Owned Capital Investment and Operation Co Ltd [42.3%]; KEPCO Shanxi International [34.0%]; KEPCO Woori sprott Global Prive [8.0%]; Power Development [7.0%]; Shanxi Gemeng International Energy Group Co Ltd [4.7%]; other [4.0%]	37.4185	110.824	exact	Xuecun Town	Liulin	Lüliang	Shanxi	https://www.gem.wiki/Shanxi_Liulin_power_station	L100000105027	G100000106344	KR7015760002	0.34	1400		29	2035	2075	2115	0.59752	0	0	0.604519	0	0	0.575951	0	0	0.532	0	0
coal	China	Asia	Eastern Asia	Shanxi Liulin power station	Phase I Unit 2	山西国际能源柳林发电厂	Liulin Liansheng power station, Liulin Huaguang power station (Phase I Unit 1, Phase I Unit 2), Liulin Huaguang power station 柳林华光热电厂 (Phase II Unit 3, Phase II Unit 4)	100	operating	1996		subcritical	unknown					Shanxi Liulin Electric Power [100%]	Shanxi State-Owned Capital Investment and Operation Co Ltd [42.3%]; KEPCO Shanxi International [34.0%]; KEPCO Woori sprott Global Prive [8.0%]; Power Development [7.0%]; Shanxi Gemeng International Energy Group Co Ltd [4.7%]; other [4.0%]	37.4185	110.824	exact	Xuecun Town	Liulin	Lüliang	Shanxi	https://www.gem.wiki/Shanxi_Liulin_power_station	L100000105027	G100000106345	KR7015760002	0.34	1400		28	2036	2076	2116	0.59752	0	0	0.604519	0	0	0.575951	0	0	0.532	0	0
coal	China	Asia	Eastern Asia	Shanxi Liulin power station	Phase II Unit 3	山西国际能源柳林发电厂	Liulin Liansheng power station, Liulin Huaguang power station (Phase I Unit 1, Phase I Unit 2), Liulin Huaguang power station 柳林华光热电厂 (Phase II Unit 3, Phase II Unit 4)	600	operating	2008		subcritical	unknown					Shanxi Huaguang Power Generation [100%]	China Huaneng Group Co Ltd [40.0%]; Shanxi State-Owned Capital Investment and Operation Co Ltd [21.2%]; KEPCO Shanxi International [17.0%]; Shanxi Coking Coal Energy Group Co Ltd [10.0%]; KEPCO Woori sprott Global Prive [4.0%]; Power Development [3.5%]; Shanxi Gemeng International Energy Group Co Ltd [2.4%]; other [2.0%]	37.4185	110.824	exact	Xuecun Town	Liulin	Lüliang	Shanxi	https://www.gem.wiki/Shanxi_Liulin_power_station	L100000105027	G100000106346	KR7015760002	0.17	1400		16	2048	2088	2128	0.59752	0	0	0.604519	0	0	0.575951	0	0	0.532	0	0
coal	China	Asia	Eastern Asia	Shanxi Liulin power station	Phase II Unit 4	山西国际能源柳林发电厂	Liulin Liansheng power station, Liulin Huaguang power station (Phase I Unit 1, Phase I Unit 2), Liulin Huaguang power station 柳林华光热电厂 (Phase II Unit 3, Phase II Unit 4)	600	operating	2008		subcritical	unknown					Shanxi Huaguang Power Generation [100%]	China Huaneng Group Co Ltd [40.0%]; Shanxi State-Owned Capital Investment and Operation Co Ltd [21.2%]; KEPCO Shanxi International [17.0%]; Shanxi Coking Coal Energy Group Co Ltd [10.0%]; KEPCO Woori sprott Global Prive [4.0%]; Power Development [3.5%]; Shanxi Gemeng International Energy Group Co Ltd [2.4%]; other [2.0%]	37.4185	110.824	exact	Xuecun Town	Liulin	Lüliang	Shanxi	https://www.gem.wiki/Shanxi_Liulin_power_station	L100000105027	G100000106347	KR7015760002	0.17	1400	1400	16	2048	2088	2128	0.59752	0	0	0.604519	0	0	0.575951	0	0	0.532	0	0
coal	China	Asia	Eastern Asia	Shanxi Ruiguang power station	Phase I Unit 1	山西国际能源瑞光热电公司热电联产		330	operating	2011		subcritical	bituminous					Shanxi Ruiguang Power [100%]	Shanxi State-Owned Capital Investment and Operation Co Ltd [42.3%]; KEPCO Shanxi International [34.0%]; KEPCO Woori sprott Global Prive [8.0%]; Power Development [7.0%]; Shanxi Gemeng International Energy Group Co Ltd [4.7%]; other [4.0%]	37.7846	112.72	exact	Wujinshan	Yuci	Jinzhong	Shanxi	https://www.gem.wiki/Shanxi_Ruiguang_power_station	L100000101511	G100000109051	KR7015760002	0.34	660		13	2051	2091	2131	0.59752	0	0	0.604519	0	0	0.575951	0	0	0.532	0	0
coal	China	Asia	Eastern Asia	Shanxi Ruiguang power station	Phase I Unit 2	山西国际能源瑞光热电公司热电联产		330	operating	2012		subcritical	bituminous					Shanxi Ruiguang Power [100%]	Shanxi State-Owned Capital Investment and Operation Co Ltd [42.3%]; KEPCO Shanxi International [34.0%]; KEPCO Woori sprott Global Prive [8.0%]; Power Development [7.0%]; Shanxi Gemeng International Energy Group Co Ltd [4.7%]; other [4.0%]	37.7846	112.72	exact	Wujinshan	Yuci	Jinzhong	Shanxi	https://www.gem.wiki/Shanxi_Ruiguang_power_station	L100000101511	G100000109052	KR7015760002	0.34	660	660	12	2052	2092	2132	0.59752	0	0	0.604519	0	0	0.575951	0	0	0.532	0	0
coal	China	Asia	Eastern Asia	Shanxi Yuguang power station	Phase I Unit 1	山西山阴煤矸石发电	Shanxi Shanyin power station, 昱光（山阴）煤矸石综合利用发电项目一期 (Phase I Unit 1, Phase I Unit 2), 昱光（山阴）煤矸石综合利用发电项目二期 (Phase II Unit 3, Phase II Unit 4)	300	operating	2012		subcritical	waste coal					Shanxi Yuguang Power Generation [100%]	Shanxi State-Owned Capital Investment and Operation Co Ltd [25.4%]; China National Coal Group [24.0%]; KEPCO Shanxi International [20.4%]; Beijing Ward Financial Investment Holding Co Ltd [15.5%]; KEPCO Woori sprott Global Prive [4.8%]; Power Development [4.2%]; other [2.9%]; Shanxi Gemeng International Energy Group Co Ltd [2.8%]	39.6159	112.799	exact	Beizhouzhuang	Shanyin	Shuozhou	Shanxi	https://www.gem.wiki/Shanxi_Yuguang_power_station	L100000101514	G100000109057	KR7015760002	0.204	1300		12	2052	2092	2132	0.59752	0	0	0.604519	0	0	0.575951	0	0	0.532	0	0
coal	China	Asia	Eastern Asia	Shanxi Yuguang power station	Phase I Unit 2	山西山阴煤矸石发电	Shanxi Shanyin power station, 昱光（山阴）煤矸石综合利用发电项目一期 (Phase I Unit 1, Phase I Unit 2), 昱光（山阴）煤矸石综合利用发电项目二期 (Phase II Unit 3, Phase II Unit 4)	300	operating	2012		subcritical	waste coal					Shanxi Yuguang Power Generation [100%]	Shanxi State-Owned Capital Investment and Operation Co Ltd [25.4%]; China National Coal Group [24.0%]; KEPCO Shanxi International [20.4%]; Beijing Ward Financial Investment Holding Co Ltd [15.5%]; KEPCO Woori sprott Global Prive [4.8%]; Power Development [4.2%]; other [2.9%]; Shanxi Gemeng International Energy Group Co Ltd [2.8%]	39.6159	112.799	exact	Beizhouzhuang	Shanyin	Shuozhou	Shanxi	https://www.gem.wiki/Shanxi_Yuguang_power_station	L100000101514	G100000109058	KR7015760002	0.204	1300		12	2052	2092	2132	0.59752	0	0	0.604519	0	0	0.575951	0	0	0.532	0	0
coal	China	Asia	Eastern Asia	Shanxi Yuguang power station	Phase II Unit 3	山西山阴煤矸石发电	Shanxi Shanyin power station, 昱光（山阴）煤矸石综合利用发电项目一期 (Phase I Unit 1, Phase I Unit 2), 昱光（山阴）煤矸石综合利用发电项目二期 (Phase II Unit 3, Phase II Unit 4)	350	operating	2019		supercritical	waste coal					Shanxi Yuguang Power Generation [100%]	Shanxi State-Owned Capital Investment and Operation Co Ltd [25.4%]; China National Coal Group [24.0%]; KEPCO Shanxi International [20.4%]; Beijing Ward Financial Investment Holding Co Ltd [15.5%]; KEPCO Woori sprott Global Prive [4.8%]; Power Development [4.2%]; other [2.9%]; Shanxi Gemeng International Energy Group Co Ltd [2.8%]	39.6159	112.799	exact	Beizhouzhuang	Shanyin	Shuozhou	Shanxi	https://www.gem.wiki/Shanxi_Yuguang_power_station	L100000101514	G100000109059	KR7015760002	0.204	1300		5	2059	2099	2139	0.59752	0	0	0.604519	0	0	0.575951	0	0	0.532	0	0
coal	China	Asia	Eastern Asia	Shanxi Yuguang power station	Phase II Unit 4	山西山阴煤矸石发电	Shanxi Shanyin power station, 昱光（山阴）煤矸石综合利用发电项目一期 (Phase I Unit 1, Phase I Unit 2), 昱光（山阴）煤矸石综合利用发电项目二期 (Phase II Unit 3, Phase II Unit 4)	350	operating	2019		supercritical	waste coal					Shanxi Yuguang Power Generation [100%]	Shanxi State-Owned Capital Investment and Operation Co Ltd [25.4%]; China National Coal Group [24.0%]; KEPCO Shanxi International [20.4%]; Beijing Ward Financial Investment Holding Co Ltd [15.5%]; KEPCO Woori sprott Global Prive [4.8%]; Power Development [4.2%]; other [2.9%]; Shanxi Gemeng International Energy Group Co Ltd [2.8%]	39.6159	112.799	exact	Beizhouzhuang	Shanyin	Shuozhou	Shanxi	https://www.gem.wiki/Shanxi_Yuguang_power_station	L100000101514	G100000109060	KR7015760002	0.204	1300	1300	5	2059	2099	2139	0.59752	0	0	0.604519	0	0	0.575951	0	0	0.532	0	0
coal	China	Asia	Eastern Asia	Shanxi Zhaoguang power station	Unit 1	山西国际能源兆光发电厂		300	operating	2005		subcritical	bituminous					Shanxi Zhaoguang Power Generation [100%]	Shanxi State-Owned Capital Investment and Operation Co Ltd [42.3%]; KEPCO Shanxi International [34.0%]; KEPCO Woori sprott Global Prive [8.0%]; Power Development [7.0%]; Shanxi Gemeng International Energy Group Co Ltd [4.7%]; other [4.0%]	36.5538	111.692	exact	Bailong	Huozhou	Linfen	Shanxi	https://www.gem.wiki/Shanxi_Zhaoguang_power_station	L100000101515	G100000109061	KR7015760002	0.34	1800		19	2045	2085	2125	0.59752	0	0	0.604519	0	0	0.575951	0	0	0.532	0	0
coal	China	Asia	Eastern Asia	Shanxi Zhaoguang power station	Unit 2	山西国际能源兆光发电厂		300	operating	2005		subcritical	bituminous					Shanxi Zhaoguang Power Generation [100%]	Shanxi State-Owned Capital Investment and Operation Co Ltd [42.3%]; KEPCO Shanxi International [34.0%]; KEPCO Woori sprott Global Prive [8.0%]; Power Development [7.0%]; Shanxi Gemeng International Energy Group Co Ltd [4.7%]; other [4.0%]	36.5538	111.692	exact	Bailong	Huozhou	Linfen	Shanxi	https://www.gem.wiki/Shanxi_Zhaoguang_power_station	L100000101515	G100000109062	KR7015760002	0.34	1800		19	2045	2085	2125	0.59752	0	0	0.604519	0	0	0.575951	0	0	0.532	0	0
coal	China	Asia	Eastern Asia	Shanxi Zhaoguang power station	Unit 3	山西国际能源兆光发电厂		600	operating	2009		supercritical	bituminous					Shanxi Zhaoguang Power Generation [100%]	Shanxi State-Owned Capital Investment and Operation Co Ltd [42.3%]; KEPCO Shanxi International [34.0%]; KEPCO Woori sprott Global Prive [8.0%]; Power Development [7.0%]; Shanxi Gemeng International Energy Group Co Ltd [4.7%]; other [4.0%]	36.5538	111.692	exact	Bailong	Huozhou	Linfen	Shanxi	https://www.gem.wiki/Shanxi_Zhaoguang_power_station	L100000101515	G100000109063	KR7015760002	0.34	1800		15	2049	2089	2129	0.59752	0	0	0.604519	0	0	0.575951	0	0	0.532	0	0
coal	China	Asia	Eastern Asia	Shanxi Zhaoguang power station	Unit 4	山西国际能源兆光发电厂		600	operating	2009		supercritical	bituminous					Shanxi Zhaoguang Power Generation [100%]	Shanxi State-Owned Capital Investment and Operation Co Ltd [42.3%]; KEPCO Shanxi International [34.0%]; KEPCO Woori sprott Global Prive [8.0%]; Power Development [7.0%]; Shanxi Gemeng International Energy Group Co Ltd [4.7%]; other [4.0%]	36.5538	111.692	exact	Bailong	Huozhou	Linfen	Shanxi	https://www.gem.wiki/Shanxi_Zhaoguang_power_station	L100000101515	G100000109064	KR7015760002	0.34	1800	1800	15	2049	2089	2129	0.59752	0	0	0.604519	0	0	0.575951	0	0	0.532	0	0
coal	South Korea	Asia	Eastern Asia	Shin Boryeong power station	Unit 1	신보령화력	Sin Boryeong power station, Shin Poryong power station, f	1000	operating	2017	2047	ultra-supercritical	bituminous					Korea Midland Power [100%]	Korea Electric Power Corp [100.0%]	36.3846	126.486	exact	Poryong-gun	Ocheon	Poryong	South Chungcheong	https://www.gem.wiki/Shin_Boryeong_power_station	L100000103482	G100000109277	KR7015760002	1	2000		7	2057	2097	2137	0.59752	0	0	0.604519	0	0	0.575951	0	0	0.532	0	0
coal	South Korea	Asia	Eastern Asia	Shin Boryeong power station	Unit 2	신보령화력	Sin Boryeong power station, Shin Poryong power station, f	1000	operating	2017	2047	ultra-supercritical	bituminous					Korea Midland Power [100%]	Korea Electric Power Corp [100.0%]	36.3846	126.486	exact	Poryong-gun	Ocheon	Poryong	South Chungcheong	https://www.gem.wiki/Shin_Boryeong_power_station	L100000103482	G100000109269	KR7015760002	1	2000	2000	7	2057	2097	2137	0.59752	0	0	0.604519	0	0	0.575951	0	0	0.532	0	0
coal	South Korea	Asia	Eastern Asia	Shin Seocheon power station	--	신서천 발전소	Sin Seocheon power station, New Seocheon power station, 신서천 발전소	1018	operating	2021	2051	ultra-supercritical	bituminous					Korea Midland Power [100%]	Korea Electric Power Corp [100.0%]	36.1441	126.496	exact	Maryang-ri	Seocheon		South Chungcheong	https://www.gem.wiki/Shin_Seocheon_power_station	L100000104888	G100000108918	KR7015760002	1	1018	1018	3	2061	2101	2141	0.59752	0	0	0.604519	0	0	0.575951	0	0	0.532	0	0
coal	Indonesia	Asia	South-eastern Asia	Tabalong power station	Unit 1		Kalsel FTP2	100	operating	2019		subcritical	lignite					PT Tanjung Power Indonesia [100%]	PT Adaro Power [65.0%]; Korea Electric Power Corp [35.0%]	-2.16343	115.441	exact	Adaro's Tanjung coal mine		Tabalong	South Kalimantan	https://www.gem.wiki/Tabalong_power_station	L100000102785	G100000109790	KR7015760002	0.35	200		5	2059	2099	2139	0.59752	0	0	0.604519	0	0	0.575951	0	0	0.532	0	0
coal	Indonesia	Asia	South-eastern Asia	Tabalong power station	Unit 2		Kalsel FTP2	100	operating	2019		subcritical	lignite					PT Tanjung Power Indonesia [100%]	PT Adaro Power [65.0%]; Korea Electric Power Corp [35.0%]	-2.16343	115.441	exact	Adaro's Tanjung coal mine		Tabalong	South Kalimantan	https://www.gem.wiki/Tabalong_power_station	L100000102785	G100000109791	KR7015760002	0.35	200	200	5	2059	2099	2139	0.59752	0	0	0.604519	0	0	0.575951	0	0	0.532	0	0
coal	South Korea	Asia	Eastern Asia	Taean power station	Unit 1	태안화력	태안화력	500	operating	1995	2025	supercritical	bituminous					Korea Western Power [100%]	Korea Electric Power Corp [100.0%]	36.9033	126.234	exact	Banggal	Wonbuk	Taean	South Chungcheong	https://www.gem.wiki/Taean_power_station	L100000103483	G100000109801	KR7015760002	1	9446		29	2035	2075	2115	0.59752	0	0	0.604519	0	0	0.575951	0	0	0.532	0	0
coal	South Korea	Asia	Eastern Asia	Taean power station	Unit 2	태안화력	태안화력	500	operating	1996	2025	supercritical	bituminous					Korea Western Power [100%]	Korea Electric Power Corp [100.0%]	36.9033	126.234	exact	Banggal	Wonbuk	Taean	South Chungcheong	https://www.gem.wiki/Taean_power_station	L100000103483	G100000109803	KR7015760002	1	9446		28	2036	2076	2116	0.59752	0	0	0.604519	0	0	0.575951	0	0	0.532	0	0
coal	South Korea	Asia	Eastern Asia	Taean power station	Unit 3	태안화력	태안화력	500	operating	1997	2028	supercritical	bituminous					Korea Western Power [100%]	Korea Electric Power Corp [100.0%]	36.9033	126.234	exact	Banggal	Wonbuk	Taean	South Chungcheong	https://www.gem.wiki/Taean_power_station	L100000103483	G100000109804	KR7015760002	1	9446		27	2037	2077	2117	0.59752	0	0	0.604519	0	0	0.575951	0	0	0.532	0	0
coal	South Korea	Asia	Eastern Asia	Taean power station	Unit 4	태안화력	태안화력	500	operating	1997	2029	supercritical	bituminous					Korea Western Power [100%]	Korea Electric Power Corp [100.0%]	36.9033	126.234	exact	Banggal	Wonbuk	Taean	South Chungcheong	https://www.gem.wiki/Taean_power_station	L100000103483	G100000109805	KR7015760002	1	9446		27	2037	2077	2117	0.59752	0	0	0.604519	0	0	0.575951	0	0	0.532	0	0
coal	South Korea	Asia	Eastern Asia	Taean power station	Unit 5	태안화력	태안화력	500	operating	2001	2032	supercritical	bituminous					Korea Western Power [100%]	Korea Electric Power Corp [100.0%]	36.9033	126.234	exact	Banggal	Wonbuk	Taean	South Chungcheong	https://www.gem.wiki/Taean_power_station	L100000103483	G100000109806	KR7015760002	1	9446		23	2041	2081	2121	0.59752	0	0	0.604519	0	0	0.575951	0	0	0.532	0	0
coal	South Korea	Asia	Eastern Asia	Taean power station	Unit 6	태안화력	태안화력	500	operating	2002	2032	supercritical	bituminous					Korea Western Power [100%]	Korea Electric Power Corp [100.0%]	36.9033	126.234	exact	Banggal	Wonbuk	Taean	South Chungcheong	https://www.gem.wiki/Taean_power_station	L100000103483	G100000109807	KR7015760002	1	9446		22	2042	2082	2122	0.59752	0	0	0.604519	0	0	0.575951	0	0	0.532	0	0
coal	South Korea	Asia	Eastern Asia	Taean power station	Unit 7	태안화력	태안화력	500	operating	2007	2037	ultra-supercritical	bituminous					Korea Western Power [100%]	Korea Electric Power Corp [100.0%]	36.9033	126.234	exact	Banggal	Wonbuk	Taean	South Chungcheong	https://www.gem.wiki/Taean_power_station	L100000103483	G100000109808	KR7015760002	1	9446		17	2047	2087	2127	0.59752	0	0	0.604519	0	0	0.575951	0	0	0.532	0	0
coal	South Korea	Asia	Eastern Asia	Taean power station	Unit 8	태안화력	태안화력	500	operating	2007	2037	ultra-supercritical	bituminous					Korea Western Power [100%]	Korea Electric Power Corp [100.0%]	36.9033	126.234	exact	Banggal	Wonbuk	Taean	South Chungcheong	https://www.gem.wiki/Taean_power_station	L100000103483	G100000109809	KR7015760002	1	9446		17	2047	2087	2127	0.59752	0	0	0.604519	0	0	0.575951	0	0	0.532	0	0
coal	South Korea	Asia	Eastern Asia	Taean power station	Unit 9	태안화력	태안화력	1050	operating	2016	2046	ultra-supercritical	bituminous					Korea Western Power [100%]	Korea Electric Power Corp [100.0%]	36.9056	126.235	exact	Banggal	Wonbuk	Taean	South Chungcheong	https://www.gem.wiki/Taean_power_station	L100000103483	G100000109810	KR7015760002	1	9446		8	2056	2096	2136	0.59752	0	0	0.604519	0	0	0.575951	0	0	0.532	0	0
coal	South Korea	Asia	Eastern Asia	Taean power station	IGCC Project	태안화력	태안화력	346	operating	2016		IGCC	unknown					Korea Western Power [100%]	Korea Electric Power Corp [100.0%]	36.9056	126.235	exact	Banggal	Wonbuk	Taean	South Chungcheong	https://www.gem.wiki/Taean_power_station	L100000103483	G100000109800	KR7015760002	1	9446		8	2056	2096	2136	0.59752	0	0	0.604519	0	0	0.575951	0	0	0.532	0	0
coal	South Korea	Asia	Eastern Asia	Taean power station	Unit 10	태안화력	태안화력	1050	operating	2017	2047	ultra-supercritical	bituminous					Korea Western Power [100%]	Korea Electric Power Corp [100.0%]	36.9056	126.235	exact	Banggal	Wonbuk	Taean	South Chungcheong	https://www.gem.wiki/Taean_power_station	L100000103483	G100000109802	KR7015760002	1	9446	9446	7	2057	2097	2137	0.59752	0	0	0.604519	0	0	0.575951	0	0	0.532	0	0
coal	China	Asia	Eastern Asia	Yangcheng power station	Phase I Unit 1	山西阳城发电厂	大唐阳城电厂	350	operating	2001		subcritical	anthracite					Yangcheng International Power Generating [100%]	China Datang Corp [38.7%]; Jiangsu Guoxin Investment Group Ltd [26.7%]; Shanxi State-Owned Capital Investment and Operation Co Ltd [9.0%]; KEPCO Shanxi International [7.3%]; China Energy Construction Group Co Ltd [6.7%]; Power Construction Corporation of China [6.7%]; KEPCO Woori sprott Global Prive [1.7%]; Power Development [1.5%]; Shanxi Gemeng International Energy Group Co Ltd [1.0%]; other [0…	35.4661	112.574	exact	Beiliu	Yangcheng	Jincheng	Shanxi	https://www.gem.wiki/Yangcheng_power_station	L100000101543	G100000111277	KR7015760002	0.073	5300		23	2041	2081	2121	0.59752	0	0	0.604519	0	0	0.575951	0	0	0.532	0	0
coal	China	Asia	Eastern Asia	Yangcheng power station	Phase I Unit 2	山西阳城发电厂	大唐阳城电厂	350	operating	2001		subcritical	anthracite					Yangcheng International Power Generating [100%]	China Datang Corp [38.7%]; Jiangsu Guoxin Investment Group Ltd [26.7%]; Shanxi State-Owned Capital Investment and Operation Co Ltd [9.0%]; KEPCO Shanxi International [7.3%]; China Energy Construction Group Co Ltd [6.7%]; Power Construction Corporation of China [6.7%]; KEPCO Woori sprott Global Prive [1.7%]; Power Development [1.5%]; Shanxi Gemeng International Energy Group Co Ltd [1.0%]; other [0…	35.4661	112.574	exact	Beiliu	Yangcheng	Jincheng	Shanxi	https://www.gem.wiki/Yangcheng_power_station	L100000101543	G100000111278	KR7015760002	0.073	5300		23	2041	2081	2121	0.59752	0	0	0.604519	0	0	0.575951	0	0	0.532	0	0
coal	China	Asia	Eastern Asia	Yangcheng power station	Phase I Unit 3	山西阳城发电厂	大唐阳城电厂	350	operating	2001		subcritical	anthracite					Yangcheng International Power Generating [100%]	China Datang Corp [38.7%]; Jiangsu Guoxin Investment Group Ltd [26.7%]; Shanxi State-Owned Capital Investment and Operation Co Ltd [9.0%]; KEPCO Shanxi International [7.3%]; China Energy Construction Group Co Ltd [6.7%]; Power Construction Corporation of China [6.7%]; KEPCO Woori sprott Global Prive [1.7%]; Power Development [1.5%]; Shanxi Gemeng International Energy Group Co Ltd [1.0%]; other [0…	35.4661	112.574	exact	Beiliu	Yangcheng	Jincheng	Shanxi	https://www.gem.wiki/Yangcheng_power_station	L100000101543	G100000111279	KR7015760002	0.073	5300		23	2041	2081	2121	0.59752	0	0	0.604519	0	0	0.575951	0	0	0.532	0	0
[truncated: 562 more rows]
[truncated: 29 more columns]
