# Supplementary material for: Assessing corporate transition plans using a production asset-based planning approach
Source: Research Square preprint supplement (doi:10.21203/rs.3.rs-5245457/v1), 2024-12-09
Supplement: Supplementary file 18 [file 4 NTPC.xlsx]

## Sheet: NTPC_all
Type	Country/area	Region	Subregion	Plant / Project name	Unit / Phase name	Plant / Project name (local)	Plant / Project name (other)	Capacity (MW)	Status	Start year	Retired year	Technology	Fuel	Country/area 1 (hydropower only)	Country/area 2 (hydropower only)	Country/area 1 Capacity (MW) (hydropower only)	Country/area 2 Capacity (MW) (hydropower only)	Owner	Parent	Latitude	Longitude	Location accuracy	City	Local area (taluk, county)	Major area (prefecture, district)	Subnational unit (state, province)	GEM.Wiki URL	GEM location ID	GEM unit/phase ID	CompISIN	Ownership	Plant capacity	Plant capacity	Age	Reinvestment year	Reinvestment year	Reinvestment year
coal	India	Asia	Southern Asia	Adra Purulia power station	Unit 1			660	cancelled			unknown	unknown					Indian Railways; NTPC	Indian Railways; NTPC	23.5	86.67	approximate	Adra		Purulia	West Bengal	https://www.gem.wiki/Adra_Purulia_power_station	L100000102658	G100000100049	INE733E01010	0.5	1320		-99	40	80	120
coal	India	Asia	Southern Asia	Adra Purulia power station	Unit 2			660	cancelled			unknown	unknown					Indian Railways; NTPC	Indian Railways; NTPC	23.5	86.67	approximate	Adra		Purulia	West Bengal	https://www.gem.wiki/Adra_Purulia_power_station	L100000102658	G100000100050	INE733E01010	0.5	1320	1320	-99	40	80	120
coal	India	Asia	Southern Asia	Anpara-E power station (MUNPL)	Unit 1			800	announced			supercritical	unknown					Meja Urja Nigam	NTPC Ltd; Uttar Pradesh Rajya Vidyut Utpadan Nigam Ltd	24.2046	82.7827	approximate	Anpara		Sonbhadra District	Uttar Pradesh	https://www.gem.wiki/Anpara-E_power_station_(MUNPL)	L100001000082	G100001000203	INE733E01010	0.5	1600		-99	40	80	120
coal	India	Asia	Southern Asia	Anpara-E power station (MUNPL)	Unit 2			800	announced			supercritical	unknown					Meja Urja Nigam	NTPC Ltd; Uttar Pradesh Rajya Vidyut Utpadan Nigam Ltd	24.2046	82.7827	approximate	Anpara		Sonbhadra District	Uttar Pradesh	https://www.gem.wiki/Anpara-E_power_station_(MUNPL)	L100001000082	G100001000204	INE733E01010	0.5	1600	1600	-99	40	80	120
coal	India	Asia	Southern Asia	Auraiya IGCC power station	--			300	cancelled			unknown	unknown					NTPC [100%]	NTPC [100.0%]	26.464	79.5065	approximate			Auraiya	Uttar Pradesh	https://www.gem.wiki/Auraiya_IGCC_power_station	L100000102614	G100000100403	INE733E01010	1	300	300	-99	40	80	120
coal	India	Asia	Southern Asia	Badarpur power station	Phase 1 Unit 1			95	retired	1973	2018	subcritical	bituminous					NTPC [100%]	NTPC [100.0%]	28.5054	77.3074	exact	Badarpur		South	Delhi	https://www.gem.wiki/Badarpur_power_station	L100000102191	G100000100419	INE733E01010	1	705		51	2013	2053	2093
coal	India	Asia	Southern Asia	Badarpur power station	Phase 1 Unit 2			95	retired	1974	2018	subcritical	bituminous					NTPC [100%]	NTPC [100.0%]	28.5054	77.3074	exact	Badarpur		South	Delhi	https://www.gem.wiki/Badarpur_power_station	L100000102191	G100000100420	INE733E01010	1	705		50	2014	2054	2094
coal	India	Asia	Southern Asia	Badarpur power station	Phase 1 Unit 3			95	retired	1975	2018	subcritical	bituminous					NTPC [100%]	NTPC [100.0%]	28.5054	77.3074	exact	Badarpur		South	Delhi	https://www.gem.wiki/Badarpur_power_station	L100000102191	G100000100421	INE733E01010	1	705		49	2015	2055	2095
coal	India	Asia	Southern Asia	Badarpur power station	Phase 2 Unit 1			210	retired	1978	2018	subcritical	bituminous					NTPC [100%]	NTPC [100.0%]	28.5054	77.3074	exact	Badarpur		South	Delhi	https://www.gem.wiki/Badarpur_power_station	L100000102191	G100000100422	INE733E01010	1	705		46	2018	2058	2098
coal	India	Asia	Southern Asia	Badarpur power station	Phase 2 Unit 2			210	retired	1981	2018	subcritical	bituminous					NTPC [100%]	NTPC [100.0%]	28.5054	77.3074	exact	Badarpur		South	Delhi	https://www.gem.wiki/Badarpur_power_station	L100000102191	G100000100423	INE733E01010	1	705	705	43	2021	2061	2101
coal	India	Asia	Southern Asia	Barethi Super Thermal Power Project	Unit 1			660	cancelled			supercritical	unknown					NTPC [100%]	NTPC [100.0%]	24.7833	79.9	exact	Barethi	Rajnagar	Chhatarpur	Madhya Pradesh	https://www.gem.wiki/Barethi_Super_Thermal_Power_Project	L100000102321	G100000100615	INE733E01010	1	2640		-99	40	80	120
coal	India	Asia	Southern Asia	Barethi Super Thermal Power Project	Unit 2			660	cancelled			supercritical	unknown					NTPC [100%]	NTPC [100.0%]	24.7833	79.9	exact	Barethi	Rajnagar	Chhatarpur	Madhya Pradesh	https://www.gem.wiki/Barethi_Super_Thermal_Power_Project	L100000102321	G100000100616	INE733E01010	1	2640		-99	40	80	120
coal	India	Asia	Southern Asia	Barethi Super Thermal Power Project	Unit 3			660	cancelled			supercritical	unknown					NTPC [100%]	NTPC [100.0%]	24.7833	79.9	exact	Barethi	Rajnagar	Chhatarpur	Madhya Pradesh	https://www.gem.wiki/Barethi_Super_Thermal_Power_Project	L100000102321	G100000100617	INE733E01010	1	2640		-99	40	80	120
coal	India	Asia	Southern Asia	Barethi Super Thermal Power Project	Unit 4			660	cancelled			supercritical	unknown					NTPC [100%]	NTPC [100.0%]	24.7833	79.9	exact	Barethi	Rajnagar	Chhatarpur	Madhya Pradesh	https://www.gem.wiki/Barethi_Super_Thermal_Power_Project	L100000102321	G100000100618	INE733E01010	1	2640	2640	-99	40	80	120
coal	India	Asia	Southern Asia	Barh I power station	Unit 1		Barh STPP	660	operating	2021		supercritical	unknown					NTPC [100%]	NTPC [100.0%]	25.4693	85.7452	exact	Barh		Patna	Bihar	https://www.gem.wiki/Barh_I_power_station	L100000102092	G100000100623	INE733E01010	1	1980		3	2061	2101	2141
coal	India	Asia	Southern Asia	Barh I power station	Unit 2		Barh STPP	660	operating	2023		supercritical	unknown					NTPC [100%]	NTPC [100.0%]	25.4865	85.7452	exact	Barh		Patna	Bihar	https://www.gem.wiki/Barh_I_power_station	L100000102092	G100000100624	INE733E01010	1	1980		1	2063	2103	2143
coal	India	Asia	Southern Asia	Barh I power station	Unit 3		Barh STPP	660	construction	2024		supercritical	unknown					NTPC [100%]	NTPC [100.0%]	25.4865	85.7452	exact	Barh		Patna	Bihar	https://www.gem.wiki/Barh_I_power_station	L100000102092	G100000100625	INE733E01010	1	1980	1980	0	2064	2104	2144
coal	India	Asia	Southern Asia	Barh II power station	Unit 1			660	operating	2014		supercritical	unknown					NTPC [100%]	NTPC [100.0%]	25.4865	85.7452	exact	Barh		Patna	Bihar	https://www.gem.wiki/Barh_II_power_station	L100000102093	G100000100626	INE733E01010	1	1320		10	2054	2094	2134
coal	India	Asia	Southern Asia	Barh II power station	Unit 2			660	operating	2015		supercritical	unknown					NTPC [100%]	NTPC [100.0%]	25.4865	85.7452	exact	Barh		Patna	Bihar	https://www.gem.wiki/Barh_II_power_station	L100000102093	G100000100627	INE733E01010	1	1320	1320	9	2055	2095	2135
coal	India	Asia	Southern Asia	Bhilai Steel power station	Unit 2			30	operating	1982		subcritical	unknown					NTPC-SAIL Power [100%]	NTPC Ltd [50.0%]; Steel Authority of India Ltd [50.0%]	21.184	81.4237	exact	Bhilai		Durg	Chhattisgarh	https://www.gem.wiki/Bhilai_Steel_power_station	L100000102132	G100000100818	INE733E01010	0.5	1560		42	2022	2062	2102
coal	India	Asia	Southern Asia	Bhilai Steel power station	Unit 3			30	operating	1983		subcritical	unknown					NTPC-SAIL Power [100%]	NTPC Ltd [50.0%]; Steel Authority of India Ltd [50.0%]	21.184	81.4237	exact	Bhilai		Durg	Chhattisgarh	https://www.gem.wiki/Bhilai_Steel_power_station	L100000102132	G100000100819	INE733E01010	0.5	1560		41	2023	2063	2103
coal	India	Asia	Southern Asia	Bhilai Steel power station	Unit 4			250	operating	2009		subcritical	unknown					NTPC-SAIL Power [100%]	NTPC Ltd [50.0%]; Steel Authority of India Ltd [50.0%]	21.184	81.4237	exact	Bhilai		Durg	Chhattisgarh	https://www.gem.wiki/Bhilai_Steel_power_station	L100000102132	G100000100820	INE733E01010	0.5	1560		15	2049	2089	2129
coal	India	Asia	Southern Asia	Bhilai Steel power station	Unit 5			250	operating	2009		subcritical	unknown					NTPC-SAIL Power [100%]	NTPC Ltd [50.0%]; Steel Authority of India Ltd [50.0%]	21.184	81.4237	exact	Bhilai		Durg	Chhattisgarh	https://www.gem.wiki/Bhilai_Steel_power_station	L100000102132	G100000100821	INE733E01010	0.5	1560		15	2049	2089	2129
coal	India	Asia	Southern Asia	Bhilai Steel power station	Unit 6			250	cancelled			unknown	unknown					NTPC-SAIL Power [100%]	NTPC Ltd [50.0%]; Steel Authority of India Ltd [50.0%]	21.184	81.4237	exact	Bhilai		Durg	Chhattisgarh	https://www.gem.wiki/Bhilai_Steel_power_station	L100000102132	G100000100822	INE733E01010	0.5	1560		-99	40	80	120
coal	India	Asia	Southern Asia	Bhilai Steel power station	Unit 7			250	cancelled			unknown	unknown					NTPC-SAIL Power [100%]	NTPC Ltd [50.0%]; Steel Authority of India Ltd [50.0%]	21.184	81.4237	exact	Bhilai		Durg	Chhattisgarh	https://www.gem.wiki/Bhilai_Steel_power_station	L100000102132	G100000100823	INE733E01010	0.5	1560		-99	40	80	120
coal	India	Asia	Southern Asia	Bhilai Steel power station	Unit 8			250	cancelled			unknown	unknown					NTPC-SAIL Power [100%]	NTPC Ltd [50.0%]; Steel Authority of India Ltd [50.0%]	21.184	81.4237	exact	Bhilai		Durg	Chhattisgarh	https://www.gem.wiki/Bhilai_Steel_power_station	L100000102132	G100000100824	INE733E01010	0.5	1560		-99	40	80	120
coal	India	Asia	Southern Asia	Bhilai Steel power station	Unit 9			250	cancelled			unknown	unknown					NTPC-SAIL Power [100%]	NTPC Ltd [50.0%]; Steel Authority of India Ltd [50.0%]	21.184	81.4237	exact	Bhilai		Durg	Chhattisgarh	https://www.gem.wiki/Bhilai_Steel_power_station	L100000102132	G100000100825	INE733E01010	0.5	1560	1560	-99	40	80	120
coal	India	Asia	Southern Asia	Bilhaur Super Thermal Power Plant	Unit 1			660	cancelled	2022		supercritical	bituminous					NTPC [100%]	NTPC [100.0%]	26.7634	80.0581	approximate	Dhundwa Jamauli	Bilhaur	Kanpur Nagar	Uttar Pradesh	https://www.gem.wiki/Bilhaur_Super_Thermal_Power_Plant	L100000102621	G100000100873	INE733E01010	1	1320		2	2062	2102	2142
coal	India	Asia	Southern Asia	Bilhaur Super Thermal Power Plant	Unit 2			660	cancelled			supercritical	bituminous					NTPC [100%]	NTPC [100.0%]	26.7634	80.0581	approximate	Dhundwa Jamauli	Bilhaur	Kanpur Nagar	Uttar Pradesh	https://www.gem.wiki/Bilhaur_Super_Thermal_Power_Plant	L100000102621	G100000100874	INE733E01010	1	1320	1320	-99	40	80	120
coal	India	Asia	Southern Asia	Bongaigaon power station	Unit 1			250	operating	2015		subcritical	bituminous					NTPC [100%]	NTPC [100.0%]	26.4444	90.3672	exact	Kumguri	Kokrajhar	Kokrajhar	Assam	https://www.gem.wiki/Bongaigaon_power_station	L100000102085	G100000101007	INE733E01010	1	1000		9	2055	2095	2135
coal	India	Asia	Southern Asia	Bongaigaon power station	Unit 2			250	operating	2017		subcritical	bituminous					NTPC [100%]	NTPC [100.0%]	26.4444	90.3672	exact	Kumguri	Kokrajhar	Kokrajhar	Assam	https://www.gem.wiki/Bongaigaon_power_station	L100000102085	G100000101008	INE733E01010	1	1000		7	2057	2097	2137
coal	India	Asia	Southern Asia	Bongaigaon power station	Unit 3			250	operating	2019		subcritical	bituminous					NTPC [100%]	NTPC [100.0%]	26.4444	90.3672	exact	Kumguri	Kokrajhar	Kokrajhar	Assam	https://www.gem.wiki/Bongaigaon_power_station	L100000102085	G100000101009	INE733E01010	1	1000		5	2059	2099	2139
coal	India	Asia	Southern Asia	Bongaigaon power station	Stage II			250	cancelled			subcritical	bituminous					NTPC [100%]	NTPC [100.0%]	26.4444	90.3672	exact	Kumguri	Kokrajhar	Kokrajhar	Assam	https://www.gem.wiki/Bongaigaon_power_station	L100000102085	G100000101010	INE733E01010	1	1000	1000	-99	40	80	120
coal	India	Asia	Southern Asia	Chichro Patsimal power station	--			2000	cancelled			unknown	unknown					NTPC [100%]	NTPC [100.0%]	23.6913	85.2722	approximate				Jharkhand	https://www.gem.wiki/Chichro_Patsimal_power_station	L100000102255	G100000101459	INE733E01010	1	2000	2000	-99	40	80	120
coal	India	Asia	Southern Asia	Darlipali power station	Phase I Unit 1		Darlipalli Super Thermal Power Station; Darlipali STPS	800	operating	2019		supercritical	unknown					NTPC [100%]	NTPC [100.0%]	21.9636	83.8919	exact	Darlipali	Lephripara	Sundergarh	Odisha	https://www.gem.wiki/Darlipali_power_station	L100000102458	G100000101987	INE733E01010	1	4800		5	2059	2099	2139
coal	India	Asia	Southern Asia	Darlipali power station	Phase I Unit 2		Darlipalli Super Thermal Power Station; Darlipali STPS	800	operating	2021		supercritical	unknown					NTPC [100%]	NTPC [100.0%]	21.9636	83.8919	exact	Darlipali	Lephripara	Sundergarh	Odisha	https://www.gem.wiki/Darlipali_power_station	L100000102458	G100000101988	INE733E01010	1	4800		3	2061	2101	2141
coal	India	Asia	Southern Asia	Darlipali power station	Phase II Unit 3		Darlipalli Super Thermal Power Station; Darlipali STPS	800	pre-permit			unknown	unknown					NTPC [100%]	NTPC [100.0%]	21.9636	83.8919	exact	Darlipali	Lephripara	Sundergarh	Odisha	https://www.gem.wiki/Darlipali_power_station	L100000102458	G100000115662	INE733E01010	1	4800		-99	40	80	120
coal	India	Asia	Southern Asia	Darlipali power station	Phase II Unit 4		Darlipalli Super Thermal Power Station; Darlipali STPS	800	cancelled			unknown	unknown					NTPC [100%]	NTPC [100.0%]	21.9636	83.8919	exact	Darlipali	Lephripara	Sundergarh	Odisha	https://www.gem.wiki/Darlipali_power_station	L100000102458	G100000115663	INE733E01010	1	4800		-99	40	80	120
coal	India	Asia	Southern Asia	Darlipali power station	Phase II Unit 5		Darlipalli Super Thermal Power Station; Darlipali STPS	800	cancelled			unknown	unknown					NTPC [100%]	NTPC [100.0%]	21.9636	83.8919	exact	Darlipali	Lephripara	Sundergarh	Odisha	https://www.gem.wiki/Darlipali_power_station	L100000102458	G100000115664	INE733E01010	1	4800		-99	40	80	120
coal	India	Asia	Southern Asia	Darlipali power station	Phase II Unit 6		Darlipalli Super Thermal Power Station; Darlipali STPS	800	cancelled			unknown	unknown					NTPC [100%]	NTPC [100.0%]	21.9636	83.8919	exact	Darlipali	Lephripara	Sundergarh	Odisha	https://www.gem.wiki/Darlipali_power_station	L100000102458	G100000115665	INE733E01010	1	4800	4800	-99	40	80	120
coal	India	Asia	Southern Asia	Devgad UMPP	--			4000	cancelled			unknown	unknown					NTPC [100%]	NTPC [100.0%]	16.3735	73.3778	approximate	Munage	Devgad	Sindhudurg	Maharashtra	https://www.gem.wiki/Devgad_UMPP	L100000102392	G100000102334	INE733E01010	1	4000	4000	-99	40	80	120
coal	India	Asia	Southern Asia	Dhopave coal plant (NTPC)	--			1600	cancelled			unknown	unknown					NTPC [100%]	NTPC [100.0%]	17.5583	73.1927	approximate	Dhopave	Guhagar	Ratnagiri	Maharashtra	https://www.gem.wiki/Dhopave_coal_plant_(NTPC)	L100000102395	G100000102345	INE733E01010	1	1600		-99	40	80	120
coal	India	Asia	Southern Asia	Dhuvaran Super Thermal Power Project	Unit 1			800	cancelled			supercritical	unknown					NTPC [100%]	NTPC [100.0%]	22.233	72.7572	exact	Dhurvan	Khambhat	Anand	Gujarat	https://www.gem.wiki/Dhuvaran_Super_Thermal_Power_Project	L100000102206	G100000102352	INE733E01010	1	1600		-99	40	80	120
coal	India	Asia	Southern Asia	Dhuvaran Super Thermal Power Project	Unit 2			800	cancelled			supercritical	unknown					NTPC [100%]	NTPC [100.0%]	22.233	72.7572	exact	Dhurvan	Khambhat	Anand	Gujarat	https://www.gem.wiki/Dhuvaran_Super_Thermal_Power_Project	L100000102206	G100000102353	INE733E01010	1	1600	1600	-99	40	80	120
coal	India	Asia	Southern Asia	Durgapur SAIL power station	Phase 2 Unit 1			60	operating	1987		subcritical	unknown					NTPC-SAIL Power [100%]	NTPC Ltd [50.0%]; Steel Authority of India Ltd [50.0%]	23.5518	87.2485	exact	Durgapur steel mill	Durgapur	Bardhaman	West Bengal	https://www.gem.wiki/Durgapur_SAIL_power_station	L100000102671	G100000102511	INE733E01010	0.5	120		37	2027	2067	2107
coal	India	Asia	Southern Asia	Durgapur SAIL power station	Phase 2 Unit 2			60	operating	1988		subcritical	unknown					NTPC-SAIL Power [100%]	NTPC Ltd [50.0%]; Steel Authority of India Ltd [50.0%]	23.5518	87.2485	exact	Durgapur steel mill	Durgapur	Bardhaman	West Bengal	https://www.gem.wiki/Durgapur_SAIL_power_station	L100000102671	G100000102512	INE733E01010	0.5	120	120	36	2028	2068	2108
coal	India	Asia	Southern Asia	Farakka power station	Unit 1			200	operating	1986		subcritical	subbituminous					NTPC [100%]	NTPC [100.0%]	24.7727	87.8937	exact	Farakka	Farakka	Murshidabad	West Bengal	https://www.gem.wiki/Farakka_power_station	L100000102673	G100000102711	INE733E01010	1	2100		38	2026	2066	2106
coal	India	Asia	Southern Asia	Farakka power station	Unit 2			200	operating	1986		subcritical	subbituminous					NTPC [100%]	NTPC [100.0%]	24.7727	87.8937	exact	Farakka	Farakka	Murshidabad	West Bengal	https://www.gem.wiki/Farakka_power_station	L100000102673	G100000102712	INE733E01010	1	2100		38	2026	2066	2106
coal	India	Asia	Southern Asia	Farakka power station	Unit 3			200	operating	1987		subcritical	subbituminous					NTPC [100%]	NTPC [100.0%]	24.7727	87.8937	exact	Farakka	Farakka	Murshidabad	West Bengal	https://www.gem.wiki/Farakka_power_station	L100000102673	G100000102713	INE733E01010	1	2100		37	2027	2067	2107
coal	India	Asia	Southern Asia	Farakka power station	Unit 4			500	operating	1992		subcritical	subbituminous					NTPC [100%]	NTPC [100.0%]	24.7727	87.8937	exact	Farakka	Farakka	Murshidabad	West Bengal	https://www.gem.wiki/Farakka_power_station	L100000102673	G100000102714	INE733E01010	1	2100		32	2032	2072	2112
coal	India	Asia	Southern Asia	Farakka power station	Unit 5			500	operating	1994		subcritical	subbituminous					NTPC [100%]	NTPC [100.0%]	24.7727	87.8937	exact	Farakka	Farakka	Murshidabad	West Bengal	https://www.gem.wiki/Farakka_power_station	L100000102673	G100000102715	INE733E01010	1	2100		30	2034	2074	2114
coal	India	Asia	Southern Asia	Farakka power station	Unit 6			500	operating	2011		subcritical	subbituminous					NTPC [100%]	NTPC [100.0%]	24.7727	87.8937	exact	Farakka	Farakka	Murshidabad	West Bengal	https://www.gem.wiki/Farakka_power_station	L100000102673	G100000102716	INE733E01010	1	2100	2100	13	2051	2091	2131
coal	India	Asia	Southern Asia	Feroze Gandhi Unchahar Power Station	Unit 1		Unchahar plant	210	operating	1988		subcritical	bituminous					NTPC [100%]	NTPC [100.0%]	25.9138	81.3272	exact	Unchahar	Unchahar	Raebareli	Uttar Pradesh	https://www.gem.wiki/Feroze_Gandhi_Unchahar_Power_Station	L100000102626	G100000102747	INE733E01010	1	1550		36	2028	2068	2108
coal	India	Asia	Southern Asia	Feroze Gandhi Unchahar Power Station	Unit 2		Unchahar plant	210	operating	1989		subcritical	bituminous					NTPC [100%]	NTPC [100.0%]	25.9138	81.3272	exact	Unchahar	Unchahar	Raebareli	Uttar Pradesh	https://www.gem.wiki/Feroze_Gandhi_Unchahar_Power_Station	L100000102626	G100000102748	INE733E01010	1	1550		35	2029	2069	2109
coal	India	Asia	Southern Asia	Feroze Gandhi Unchahar Power Station	Unit 3		Unchahar plant	210	operating	1999		subcritical	bituminous					NTPC [100%]	NTPC [100.0%]	25.9138	81.3272	exact	Unchahar	Unchahar	Raebareli	Uttar Pradesh	https://www.gem.wiki/Feroze_Gandhi_Unchahar_Power_Station	L100000102626	G100000102749	INE733E01010	1	1550		25	2039	2079	2119
coal	India	Asia	Southern Asia	Feroze Gandhi Unchahar Power Station	Unit 4		Unchahar plant	210	operating	1999		subcritical	bituminous					NTPC [100%]	NTPC [100.0%]	25.9138	81.3272	exact	Unchahar	Unchahar	Raebareli	Uttar Pradesh	https://www.gem.wiki/Feroze_Gandhi_Unchahar_Power_Station	L100000102626	G100000102750	INE733E01010	1	1550		25	2039	2079	2119
coal	India	Asia	Southern Asia	Feroze Gandhi Unchahar Power Station	Unit 5		Unchahar plant	210	operating	2006		subcritical	bituminous					NTPC [100%]	NTPC [100.0%]	25.9138	81.3272	exact	Unchahar	Unchahar	Raebareli	Uttar Pradesh	https://www.gem.wiki/Feroze_Gandhi_Unchahar_Power_Station	L100000102626	G100000102751	INE733E01010	1	1550		18	2046	2086	2126
coal	India	Asia	Southern Asia	Feroze Gandhi Unchahar Power Station	Unit 6		Unchahar plant	500	operating	2017		subcritical	bituminous					NTPC [100%]	NTPC [100.0%]	25.9123	81.3206	exact	Unchahar		Raebareli	Uttar Pradesh	https://www.gem.wiki/Feroze_Gandhi_Unchahar_Power_Station	L100000102626	G100000102752	INE733E01010	1	1550	1550	7	2057	2097	2137
coal	India	Asia	Southern Asia	Gadarwara Super Thermal Power Project	Unit 1		Narsinghpur power station	800	operating	2018		unknown	unknown					NTPC [100%]	NTPC [100.0%]	22.8618	78.8661	exact	Chorbarheta	Gadarwara	Narsinghpur	Madhya Pradesh	https://www.gem.wiki/Gadarwara_Super_Thermal_Power_Project	L100000102332	G100000102892	INE733E01010	1	1600		6	2058	2098	2138
coal	India	Asia	Southern Asia	Gadarwara Super Thermal Power Project	Unit 2		Narsinghpur power station	800	operating	2021		unknown	unknown					NTPC [100%]	NTPC [100.0%]	22.8618	78.8661	exact	Chorbarheta	Gadarwara	Narsinghpur	Madhya Pradesh	https://www.gem.wiki/Gadarwara_Super_Thermal_Power_Project	L100000102332	G100000102893	INE733E01010	1	1600		3	2061	2101	2141
coal	India	Asia	Southern Asia	Gajmara Super Thermal Power Station	Unit 1			800	cancelled			supercritical	unknown					NTPC [100%]	NTPC [100.0%]	20.6562	85.6043	approximate	Gajmara		Dhenkanal	Odisha	https://www.gem.wiki/Gajmara_Super_Thermal_Power_Station	L100000102462	G100000102901	INE733E01010	1	1600		-99	40	80	120
coal	India	Asia	Southern Asia	Gajmara Super Thermal Power Station	Unit 2			800	cancelled			supercritical	unknown					NTPC [100%]	NTPC [100.0%]	20.6562	85.6043	approximate	Gajmara		Dhenkanal	Odisha	https://www.gem.wiki/Gajmara_Super_Thermal_Power_Station	L100000102462	G100000102902	INE733E01010	1	1600	1600	-99	40	80	120
coal	India	Asia	Southern Asia	Garo Hills power station	--			500	cancelled			subcritical	unknown					North Eastern Electric Power [100%]	NTPC Ltd [100.0%]	25.4955	90.6168	approximate	Darugiri		South Garo Hills	Meghalaya	https://www.gem.wiki/Garo_Hills_power_station	L100000102439	G100000102954	INE733E01010	1	500	500	-99	40	80	120
coal	India	Asia	Southern Asia	Godhna power station	Phase I Unit 1		Janjgir power station	800	cancelled			supercritical	unknown					NTPC; Karnataka Power	Karnataka Power; NTPC	21.8264	82.6048	approximate	Godhna		Janjgir	Chhattisgarh	https://www.gem.wiki/Godhna_power_station	L100000102145	G100000103070	INE733E01010	0.5	2400		-99	40	80	120
coal	India	Asia	Southern Asia	Godhna power station	Phase I Unit 2		Janjgir power station	800	cancelled			supercritical	unknown					NTPC; Karnataka Power	Karnataka Power; NTPC	21.8264	82.6048	approximate	Godhna		Janjgir	Chhattisgarh	https://www.gem.wiki/Godhna_power_station	L100000102145	G100000103071	INE733E01010	0.5	2400		-99	40	80	120
coal	India	Asia	Southern Asia	Godhna power station	Phase II Unit 1		Janjgir power station	800	cancelled			unknown	unknown					NTPC; Karnataka Power	Karnataka Power; NTPC	21.8264	82.6048	approximate	Godhna		Janjgir	Chhattisgarh	https://www.gem.wiki/Godhna_power_station	L100000102145	G100000103072	INE733E01010	0.5	2400	2400	-99	40	80	120
coal	India	Asia	Southern Asia	Indira Gandhi Super Thermal Power Project	Unit 1		Aravali Thermal Power Project	500	operating	2010		subcritical	bituminous					Aravali Power Company [100%]	NTPC Ltd [50.0%]; Haryana Power Generation Co Ltd [25.0%]; Indraprastha Power Generation Co Ltd [25.0%]	28.4851	76.3732	exact	Jharli	Matenhail	Jhajjar	Haryana	https://www.gem.wiki/Indira_Gandhi_Super_Thermal_Power_Project	L100000102237	G100000104845	INE733E01010	0.5	2820		14	2050	2090	2130
coal	India	Asia	Southern Asia	Indira Gandhi Super Thermal Power Project	Unit 2		Aravali Thermal Power Project	500	operating	2011		subcritical	bituminous					Aravali Power Company [100%]	NTPC Ltd [50.0%]; Haryana Power Generation Co Ltd [25.0%]; Indraprastha Power Generation Co Ltd [25.0%]	28.4851	76.3732	exact	Jharli	Matenhail	Jhajjar	Haryana	https://www.gem.wiki/Indira_Gandhi_Super_Thermal_Power_Project	L100000102237	G100000104846	INE733E01010	0.5	2820		13	2051	2091	2131
coal	India	Asia	Southern Asia	Indira Gandhi Super Thermal Power Project	Unit 3		Aravali Thermal Power Project	500	operating	2012		subcritical	bituminous					Aravali Power Company [100%]	NTPC Ltd [50.0%]; Haryana Power Generation Co Ltd [25.0%]; Indraprastha Power Generation Co Ltd [25.0%]	28.4851	76.3732	exact	Jharli	Matenhail	Jhajjar	Haryana	https://www.gem.wiki/Indira_Gandhi_Super_Thermal_Power_Project	L100000102237	G100000104847	INE733E01010	0.5	2820		12	2052	2092	2132
coal	India	Asia	Southern Asia	Indira Gandhi Super Thermal Power Project	Unit 4		Aravali Thermal Power Project	660	cancelled	2012		supercritical	unknown					Aravali Power Company [100%]	NTPC Ltd [50.0%]; Haryana Power Generation Co Ltd [25.0%]; Indraprastha Power Generation Co Ltd [25.0%]	28.4851	76.3732	exact	Jharli	Matenhail	Jhajjar	Haryana	https://www.gem.wiki/Indira_Gandhi_Super_Thermal_Power_Project	L100000102237	G100000104848	INE733E01010	0.5	2820		12	2052	2092	2132
coal	India	Asia	Southern Asia	Indira Gandhi Super Thermal Power Project	Unit 5		Aravali Thermal Power Project	660	cancelled	2012		supercritical	unknown					Aravali Power Company [100%]	NTPC Ltd [50.0%]; Haryana Power Generation Co Ltd [25.0%]; Indraprastha Power Generation Co Ltd [25.0%]	28.4851	76.3732	exact	Jharli	Matenhail	Jhajjar	Haryana	https://www.gem.wiki/Indira_Gandhi_Super_Thermal_Power_Project	L100000102237	G100000104849	INE733E01010	0.5	2820	2820	12	2052	2092	2132
coal	India	Asia	Southern Asia	Jagdishpur captive power station	Unit 1			250	cancelled			unknown	unknown					NTPC-SAIL Power [100%]	NTPC Ltd [50.0%]; Steel Authority of India Ltd [50.0%]	26.75	80.533	approximate	Jagdishpur	Jagdishpur	Sultanpur	Uttar Pradesh	https://www.gem.wiki/Jagdishpur_captive_power_station	L100000102631	G100000104946	INE733E01010	0.5	500		-99	40	80	120
coal	India	Asia	Southern Asia	Jagdishpur captive power station	Unit 2			250	cancelled			unknown	unknown					NTPC-SAIL Power [100%]	NTPC Ltd [50.0%]; Steel Authority of India Ltd [50.0%]	26.75	80.533	approximate	Jagdishpur	Jagdishpur	Sultanpur	Uttar Pradesh	https://www.gem.wiki/Jagdishpur_captive_power_station	L100000102631	G100000104947	INE733E01010	0.5	500	500	-99	40	80	120
coal	India	Asia	Southern Asia	Kahalgaon Super Thermal Power Plant	Unit 1			210	operating	1992		subcritical	lignite					NTPC [100%]	NTPC [100.0%]	25.2369	87.2656	exact	Kahalgaon		Bhagalpur	Bihar	https://www.gem.wiki/Kahalgaon_Super_Thermal_Power_Plant	L100000102104	G100000105425	INE733E01010	1	2340		32	2032	2072	2112
coal	India	Asia	Southern Asia	Kahalgaon Super Thermal Power Plant	Unit 2			210	operating	1994		subcritical	lignite					NTPC [100%]	NTPC [100.0%]	25.2369	87.2656	exact	Kahalgaon		Bhagalpur	Bihar	https://www.gem.wiki/Kahalgaon_Super_Thermal_Power_Plant	L100000102104	G100000105426	INE733E01010	1	2340		30	2034	2074	2114
coal	India	Asia	Southern Asia	Kahalgaon Super Thermal Power Plant	Unit 3			210	operating	1995		subcritical	lignite					NTPC [100%]	NTPC [100.0%]	25.2369	87.2656	exact	Kahalgaon		Bhagalpur	Bihar	https://www.gem.wiki/Kahalgaon_Super_Thermal_Power_Plant	L100000102104	G100000105427	INE733E01010	1	2340		29	2035	2075	2115
coal	India	Asia	Southern Asia	Kahalgaon Super Thermal Power Plant	Unit 4			210	operating	1996		subcritical	lignite					NTPC [100%]	NTPC [100.0%]	25.2369	87.2656	exact	Kahalgaon		Bhagalpur	Bihar	https://www.gem.wiki/Kahalgaon_Super_Thermal_Power_Plant	L100000102104	G100000105428	INE733E01010	1	2340		28	2036	2076	2116
coal	India	Asia	Southern Asia	Kahalgaon Super Thermal Power Plant	Unit 5			500	operating	2008		subcritical	lignite					NTPC [100%]	NTPC [100.0%]	25.2369	87.2656	exact	Kahalgaon		Bhagalpur	Bihar	https://www.gem.wiki/Kahalgaon_Super_Thermal_Power_Plant	L100000102104	G100000105429	INE733E01010	1	2340		16	2048	2088	2128
coal	India	Asia	Southern Asia	Kahalgaon Super Thermal Power Plant	Unit 6			500	operating	2009		subcritical	lignite					NTPC [100%]	NTPC [100.0%]	25.2369	87.2656	exact	Kahalgaon		Bhagalpur	Bihar	https://www.gem.wiki/Kahalgaon_Super_Thermal_Power_Plant	L100000102104	G100000105430	INE733E01010	1	2340		15	2049	2089	2129
coal	India	Asia	Southern Asia	Kahalgaon Super Thermal Power Plant	Unit 7			500	operating	2010		subcritical	lignite					NTPC [100%]	NTPC [100.0%]	25.2369	87.2656	exact	Kahalgaon		Bhagalpur	Bihar	https://www.gem.wiki/Kahalgaon_Super_Thermal_Power_Plant	L100000102104	G100000105431	INE733E01010	1	2340	2340	14	2050	2090	2130
coal	India	Asia	Southern Asia	Katwa Super Thermal Power Project (NTPC)	Unit 1			660	shelved			supercritical	unknown					NTPC [100%]	NTPC [100.0%]	23.65	88.13	approximate	Katwa		Bardhaman	West Bengal	https://www.gem.wiki/Katwa_Super_Thermal_Power_Project_(NTPC)	L100000102676	G100000105623	INE733E01010	1	1320		-99	40	80	120
coal	India	Asia	Southern Asia	Katwa Super Thermal Power Project (NTPC)	Unit 2			660	shelved			supercritical	unknown					NTPC [100%]	NTPC [100.0%]	23.65	88.13	approximate	Katwa		Bardhaman	West Bengal	https://www.gem.wiki/Katwa_Super_Thermal_Power_Project_(NTPC)	L100000102676	G100000105624	INE733E01010	1	1320		-99	40	80	120
coal	India	Asia	Southern Asia	Khargone power station	Unit 1			660	operating	2019		ultra-supercritical	unknown					NTPC [100%]	NTPC [100.0%]	22.0652	75.8519	exact	Selda	Barwah	Khargone	Madhya Pradesh	https://www.gem.wiki/Khargone_power_station	L100000102345	G100000105722	INE733E01010	1	1320		5	2059	2099	2139
coal	India	Asia	Southern Asia	Khargone power station	Unit 2			660	operating	2020		ultra-supercritical	unknown					NTPC [100%]	NTPC [100.0%]	22.0652	75.8519	exact	Selda	Barwah	Khargone	Madhya Pradesh	https://www.gem.wiki/Khargone_power_station	L100000102345	G100000105723	INE733E01010	1	1320	1320	4	2060	2100	2140
coal	India	Asia	Southern Asia	Khurja power station	Unit 1			660	construction	2024		supercritical	unknown					THDC India [100%]	NTPC Ltd [74.5%]; State of Uttar Pradesh [25.5%]	28.1583	77.9083	exact	Naiphal	Khurja	Bulandshahar	Uttar Pradesh	https://www.gem.wiki/Khurja_power_station	L100000102636	G100000105727	INE733E01010	0.745	1980		0	2064	2104	2144
coal	India	Asia	Southern Asia	Khurja power station	Unit 2			660	construction	2024		supercritical	unknown					THDC India [100%]	NTPC Ltd [74.5%]; State of Uttar Pradesh [25.5%]	28.1583	77.9083	exact	Naiphal	Khurja	Bulandshahar	Uttar Pradesh	https://www.gem.wiki/Khurja_power_station	L100000102636	G100000112418	INE733E01010	0.745	1980		0	2064	2104	2144
coal	India	Asia	Southern Asia	Khurja power station	Unit 3			660	cancelled			supercritical	unknown					THDC India [100%]	NTPC Ltd [74.5%]; State of Uttar Pradesh [25.5%]	28.1583	77.9083	exact	Naiphal	Khurja	Bulandshahar	Uttar Pradesh	https://www.gem.wiki/Khurja_power_station	L100000102636	G100000112419	INE733E01010	0.745	1980	1980	-99	40	80	120
coal	India	Asia	Southern Asia	Korba Super Thermal Power Station (NTPC)	Unit 1		Korba III power station (Unit 7) (Unit 7 (Korba III))	200	operating	1983		subcritical	bituminous					NTPC [100%]	NTPC [100.0%]	22.3874	82.6819	exact	Kusmunda	Katghora	Korba	Chhattisgarh	https://www.gem.wiki/Korba_Super_Thermal_Power_Station_(NTPC)	L100000102157	G100000105864	INE733E01010	1	2600		41	2023	2063	2103
coal	India	Asia	Southern Asia	Korba Super Thermal Power Station (NTPC)	Unit 2		Korba III power station (Unit 7) (Unit 7 (Korba III))	200	operating	1983		subcritical	bituminous					NTPC [100%]	NTPC [100.0%]	22.3874	82.6819	exact	Kusmunda	Katghora	Korba	Chhattisgarh	https://www.gem.wiki/Korba_Super_Thermal_Power_Station_(NTPC)	L100000102157	G100000105865	INE733E01010	1	2600		41	2023	2063	2103
coal	India	Asia	Southern Asia	Korba Super Thermal Power Station (NTPC)	Unit 3		Korba III power station (Unit 7) (Unit 7 (Korba III))	200	operating	1984		subcritical	bituminous					NTPC [100%]	NTPC [100.0%]	22.3874	82.6819	exact	Kusmunda	Katghora	Korba	Chhattisgarh	https://www.gem.wiki/Korba_Super_Thermal_Power_Station_(NTPC)	L100000102157	G100000105866	INE733E01010	1	2600		40	2024	2064	2104
coal	India	Asia	Southern Asia	Korba Super Thermal Power Station (NTPC)	Unit 4		Korba III power station (Unit 7) (Unit 7 (Korba III))	500	operating	1987		subcritical	bituminous					NTPC [100%]	NTPC [100.0%]	22.3874	82.6819	exact	Kusmunda	Katghora	Korba	Chhattisgarh	https://www.gem.wiki/Korba_Super_Thermal_Power_Station_(NTPC)	L100000102157	G100000105867	INE733E01010	1	2600		37	2027	2067	2107
coal	India	Asia	Southern Asia	Korba Super Thermal Power Station (NTPC)	Unit 5		Korba III power station (Unit 7) (Unit 7 (Korba III))	500	operating	1988		subcritical	bituminous					NTPC [100%]	NTPC [100.0%]	22.3874	82.6819	exact	Kusmunda	Katghora	Korba	Chhattisgarh	https://www.gem.wiki/Korba_Super_Thermal_Power_Station_(NTPC)	L100000102157	G100000105868	INE733E01010	1	2600		36	2028	2068	2108
coal	India	Asia	Southern Asia	Korba Super Thermal Power Station (NTPC)	Unit 6		Korba III power station (Unit 7) (Unit 7 (Korba III))	500	operating	1989		subcritical	bituminous					NTPC [100%]	NTPC [100.0%]	22.3874	82.6819	exact	Kusmunda	Katghora	Korba	Chhattisgarh	https://www.gem.wiki/Korba_Super_Thermal_Power_Station_(NTPC)	L100000102157	G100000105869	INE733E01010	1	2600		35	2029	2069	2109
coal	India	Asia	Southern Asia	Korba Super Thermal Power Station (NTPC)	Unit 7 (Korba III)		Korba III power station (Unit 7) (Unit 7 (Korba III))	500	operating	2010		subcritical	bituminous					NTPC [100%]	NTPC [100.0%]	22.3881	82.6858	exact	Kusmunda	Katghora	Korba	Chhattisgarh	https://www.gem.wiki/Korba_Super_Thermal_Power_Station_(NTPC)	L100000102157	G100000105870	INE733E01010	1	2600	2600	14	2050	2090	2130
coal	India	Asia	Southern Asia	Kudgi Super Thermal Power Project	Unit 1			800	operating	2016		supercritical	unknown					NTPC [100%]	NTPC [100.0%]	16.4995	75.8346	exact	Kudgi		Bijapur	Karnataka	https://www.gem.wiki/Kudgi_Super_Thermal_Power_Project	L100000102306	G100000106008	INE733E01010	1	4000		8	2056	2096	2136
coal	India	Asia	Southern Asia	Kudgi Super Thermal Power Project	Unit 2			800	operating	2017		supercritical	unknown					NTPC [100%]	NTPC [100.0%]	16.4995	75.8346	exact	Kudgi		Bijapur	Karnataka	https://www.gem.wiki/Kudgi_Super_Thermal_Power_Project	L100000102306	G100000106009	INE733E01010	1	4000		7	2057	2097	2137
coal	India	Asia	Southern Asia	Kudgi Super Thermal Power Project	Unit 3			800	operating	2018		supercritical	unknown					NTPC [100%]	NTPC [100.0%]	16.4995	75.8346	exact	Kudgi		Bijapur	Karnataka	https://www.gem.wiki/Kudgi_Super_Thermal_Power_Project	L100000102306	G100000106010	INE733E01010	1	4000		6	2058	2098	2138
coal	India	Asia	Southern Asia	Kudgi Super Thermal Power Project	Unit 4			800	cancelled			supercritical	unknown					NTPC [100%]	NTPC [100.0%]	16.4995	75.8346	exact	Kudgi		Bijapur	Karnataka	https://www.gem.wiki/Kudgi_Super_Thermal_Power_Project	L100000102306	G100000106011	INE733E01010	1	4000		-99	40	80	120
coal	India	Asia	Southern Asia	Kudgi Super Thermal Power Project	Unit 5			800	cancelled			supercritical	unknown					NTPC [100%]	NTPC [100.0%]	16.4995	75.8346	exact	Kudgi		Bijapur	Karnataka	https://www.gem.wiki/Kudgi_Super_Thermal_Power_Project	L100000102306	G100000106012	INE733E01010	1	4000	4000	-99	40	80	120
coal	India	Asia	Southern Asia	Lakhisarai Thermal Power Station	Unit 1		Kajara power station	660	cancelled			unknown	unknown					Bihar State Power Holding; NTPC	Bihar State Power Holding; NTPC	25.1804	86.259	approximate	Pokhrawan and Lai	Surajgarha	Lakhisarai	Bihar	https://www.gem.wiki/Lakhisarai_Thermal_Power_Station	L100000102109	G100000106119	INE733E01010	0.5	1320		-99	40	80	120
coal	India	Asia	Southern Asia	Lakhisarai Thermal Power Station	Unit 2		Kajara power station	660	cancelled			unknown	unknown					Bihar State Power Holding; NTPC	Bihar State Power Holding; NTPC	25.1804	86.259	approximate	Pokhrawan and Lai	Surajgarha	Lakhisarai	Bihar	https://www.gem.wiki/Lakhisarai_Thermal_Power_Station	L100000102109	G100000106120	INE733E01010	0.5	1320	1320	-99	40	80	120
coal	India	Asia	Southern Asia	Lara Integrated Thermal Power Project	Unit 1		NTPC Lara, Lara STPP	800	operating	2018		supercritical	unknown					NTPC [100%]	NTPC [100.0%]	21.7577	83.4575	exact	Mahloi	Pussore	Raigarh	Chhattisgarh	https://www.gem.wiki/Lara_Integrated_Thermal_Power_Project	L100000102164	G100000106174	INE733E01010	1	4000		6	2058	2098	2138
coal	India	Asia	Southern Asia	Lara Integrated Thermal Power Project	Unit 2		NTPC Lara, Lara STPP	800	operating	2020		supercritical	unknown					NTPC [100%]	NTPC [100.0%]	21.7577	83.4575	exact	Mahloi	Pussore	Raigarh	Chhattisgarh	https://www.gem.wiki/Lara_Integrated_Thermal_Power_Project	L100000102164	G100000106175	INE733E01010	1	4000		4	2060	2100	2140
coal	India	Asia	Southern Asia	Lara Integrated Thermal Power Project	Unit 3		NTPC Lara, Lara STPP	800	permitted	2028		supercritical	unknown					NTPC [100%]	NTPC [100.0%]	21.7577	83.4575	exact	Mahloi	Pussore	Raigarh	Chhattisgarh	https://www.gem.wiki/Lara_Integrated_Thermal_Power_Project	L100000102164	G100000106176	INE733E01010	1	4000		-4	2068	2108	2148
coal	India	Asia	Southern Asia	Lara Integrated Thermal Power Project	Unit 4		NTPC Lara, Lara STPP	800	permitted	2028		supercritical	unknown					NTPC [100%]	NTPC [100.0%]	21.7577	83.4575	exact	Mahloi	Pussore	Raigarh	Chhattisgarh	https://www.gem.wiki/Lara_Integrated_Thermal_Power_Project	L100000102164	G100000106177	INE733E01010	1	4000		-4	2068	2108	2148
coal	India	Asia	Southern Asia	Lara Integrated Thermal Power Project	Unit 5		NTPC Lara, Lara STPP	800	cancelled			supercritical	unknown					NTPC [100%]	NTPC [100.0%]	21.7577	83.4575	exact	Mahloi	Pussore	Raigarh	Chhattisgarh	https://www.gem.wiki/Lara_Integrated_Thermal_Power_Project	L100000102164	G100000106178	INE733E01010	1	4000		-99	40	80	120
coal	India	Asia	Southern Asia	Marakkanam Super Thermal Power Project	--			4000	cancelled			ultra-supercritical	unknown					NTPC [100%]	NTPC [100.0%]	12.1904	79.9419	approximate	Marakkanam		Villupuram	Tamil Nadu	https://www.gem.wiki/Marakkanam_Super_Thermal_Power_Project	L100000102557	G100000106659	INE733E01010	1	4000	4000	-99	40	80	120
coal	India	Asia	Southern Asia	Margherita power station	--			660	cancelled			supercritical	unknown					North Eastern Electric Power [100%]	NTPC Ltd [100.0%]	27.4895	95.3601	approximate	Saleki NC & Lekhapani	Makum Mouza	Tinsukia	Assam	https://www.gem.wiki/Margherita_power_station	L100000102087	G100000106661	INE733E01010	1	660	660	-99	40	80	120
coal	India	Asia	Southern Asia	Mauda power station	Unit 1		Mouda Super Thermal Power Project	500	operating	2012		subcritical	unknown					NTPC [100%]	NTPC [100.0%]	21.1807	79.3965	exact		Mouda	Nabpur	Maharashtra	https://www.gem.wiki/Mauda_power_station	L100000102415	G100000106746	INE733E01010	1	2320		12	2052	2092	2132
coal	India	Asia	Southern Asia	Mauda power station	Unit 2		Mouda Super Thermal Power Project	500	operating	2013		subcritical	unknown					NTPC [100%]	NTPC [100.0%]	21.1807	79.3965	exact		Mouda	Nabpur	Maharashtra	https://www.gem.wiki/Mauda_power_station	L100000102415	G100000106747	INE733E01010	1	2320		11	2053	2093	2133
coal	India	Asia	Southern Asia	Mauda power station	Unit 3		Mouda Super Thermal Power Project	660	operating	2016		supercritical	unknown					NTPC [100%]	NTPC [100.0%]	21.1807	79.3965	exact		Mouda	Nabpur	Maharashtra	https://www.gem.wiki/Mauda_power_station	L100000102415	G100000106748	INE733E01010	1	2320		8	2056	2096	2136
coal	India	Asia	Southern Asia	Mauda power station	Unit 4		Mouda Super Thermal Power Project	660	operating	2017		supercritical	unknown					NTPC [100%]	NTPC [100.0%]	21.1807	79.3965	exact		Mouda	Nabpur	Maharashtra	https://www.gem.wiki/Mauda_power_station	L100000102415	G100000106749	INE733E01010	1	2320	2320	7	2057	2097	2137
coal	Sri Lanka	Asia	Southern Asia	Mawella Coal Power Development Project	Unit 1			300	cancelled			subcritical	unknown					NTPC; Ceylon Electricity	Ceylon Electricity; NTPC	5.98849	80.7359	approximate	Kudawella/Mawalla		Trincomalee	Eastern	https://www.gem.wiki/Mawella_Coal_Power_Development_Project	L100000103518	G100000106757	INE733E01010	0.5	600		-99	40	80	120
coal	Sri Lanka	Asia	Southern Asia	Mawella Coal Power Development Project	Unit 2			300	cancelled			subcritical	unknown					NTPC; Ceylon Electricity	Ceylon Electricity; NTPC	5.98849	80.7359	approximate	Kudawella/Mawalla		Trincomalee	Eastern	https://www.gem.wiki/Mawella_Coal_Power_Development_Project	L100000103518	G100000106758	INE733E01010	0.5	600	600	-99	40	80	120
coal	India	Asia	Southern Asia	Meja Thermal Power Project	Stage I Unit 1			660	operating	2018		supercritical	unknown					Meja Urja Nigam [100%]	NTPC Ltd [50.0%]; Uttar Pradesh Rajya Vidyut Utpadan Nigam Ltd [50.0%]	25.1459	81.9401	exact	Meja		Allahabad	Uttar Pradesh	https://www.gem.wiki/Meja_Thermal_Power_Project	L100000102640	G100000106821	INE733E01010	0.5	3720		6	2058	2098	2138
coal	India	Asia	Southern Asia	Meja Thermal Power Project	Stage I Unit 2			660	operating	2021		supercritical	unknown					Meja Urja Nigam [100%]	NTPC Ltd [50.0%]; Uttar Pradesh Rajya Vidyut Utpadan Nigam Ltd [50.0%]	25.1459	81.9401	exact	Meja		Allahabad	Uttar Pradesh	https://www.gem.wiki/Meja_Thermal_Power_Project	L100000102640	G100000106822	INE733E01010	0.5	3720		3	2061	2101	2141
coal	India	Asia	Southern Asia	Meja Thermal Power Project	Stage II Unit 3			800	pre-permit			unknown	unknown					Meja Urja Nigam [100%]	NTPC Ltd [50.0%]; Uttar Pradesh Rajya Vidyut Utpadan Nigam Ltd [50.0%]	25.1459	81.9401	exact	Meja		Allahabad	Uttar Pradesh	https://www.gem.wiki/Meja_Thermal_Power_Project	L100000102640	G100000115761	INE733E01010	0.5	3720		-99	40	80	120
coal	India	Asia	Southern Asia	Meja Thermal Power Project	Stage II Unit 4			800	pre-permit			unknown	unknown					Meja Urja Nigam [100%]	NTPC Ltd [50.0%]; Uttar Pradesh Rajya Vidyut Utpadan Nigam Ltd [50.0%]	25.1459	81.9401	exact	Meja		Allahabad	Uttar Pradesh	https://www.gem.wiki/Meja_Thermal_Power_Project	L100000102640	G100000115762	INE733E01010	0.5	3720		-99	40	80	120
coal	India	Asia	Southern Asia	Meja Thermal Power Project	Stage II Unit 5			800	pre-permit			unknown	unknown					Meja Urja Nigam [100%]	NTPC Ltd [50.0%]; Uttar Pradesh Rajya Vidyut Utpadan Nigam Ltd [50.0%]	25.1459	81.9401	exact	Meja		Allahabad	Uttar Pradesh	https://www.gem.wiki/Meja_Thermal_Power_Project	L100000102640	G100001000259	INE733E01010	0.5	3720	3720	-99	40	80	120
coal	India	Asia	Southern Asia	Muzaffarpur power station	Unit 1		Kanti power station, Kanti Muzaffarpur power station	110	retired	1985	2021	subcritical	bituminous					Kanti Bijlee Utpadan Nigam [100%]	NTPC Ltd [100.0%]	26.1948	85.3033	exact	Kanti		Muzaffarpur	Bihar	https://www.gem.wiki/Muzaffarpur_power_station	L100000102112	G100000107142	INE733E01010	1	610		39	2025	2065	2105
coal	India	Asia	Southern Asia	Muzaffarpur power station	Unit 2		Kanti power station, Kanti Muzaffarpur power station	110	retired	1985	2021	subcritical	bituminous					Kanti Bijlee Utpadan Nigam [100%]	NTPC Ltd [100.0%]	26.1948	85.3033	exact	Kanti		Muzaffarpur	Bihar	https://www.gem.wiki/Muzaffarpur_power_station	L100000102112	G100000107143	INE733E01010	1	610		39	2025	2065	2105
coal	India	Asia	Southern Asia	Muzaffarpur power station	Unit 3		Kanti power station, Kanti Muzaffarpur power station	195	operating	2015		subcritical	bituminous					Kanti Bijlee Utpadan Nigam [100%]	NTPC Ltd [100.0%]	26.1948	85.3033	exact	Kanti		Muzaffarpur	Bihar	https://www.gem.wiki/Muzaffarpur_power_station	L100000102112	G100000107144	INE733E01010	1	610		9	2055	2095	2135
coal	India	Asia	Southern Asia	Muzaffarpur power station	Unit 4		Kanti power station, Kanti Muzaffarpur power station	195	operating	2017		unknown	unknown					Kanti Bijlee Utpadan Nigam [100%]	NTPC Ltd [100.0%]	26.1948	85.3033	exact	Kanti		Muzaffarpur	Bihar	https://www.gem.wiki/Muzaffarpur_power_station	L100000102112	G100000107145	INE733E01010	1	610	610	7	2057	2097	2137
coal	India	Asia	Southern Asia	Nabinagar Super Thermal Power Project	Unit 1		New Nabi Nagar	660	operating	2019		supercritical	unknown					Nabinagar Power Generating Company [100%]	NTPC Ltd [100.0%]	24.776	84.158	exact	Majhiyan and Ankorha	Nabinagar	Aurangabad	Bihar	https://www.gem.wiki/Nabinagar_Super_Thermal_Power_Project	L100000102113	G100000107158	INE733E01010	1	1980		5	2059	2099	2139
coal	India	Asia	Southern Asia	Nabinagar Super Thermal Power Project	Unit 2		New Nabi Nagar	660	operating	2021		supercritical	unknown					Nabinagar Power Generating Company [100%]	NTPC Ltd [100.0%]	24.776	84.158	exact	Majhiyan and Ankorha	Nabinagar	Aurangabad	Bihar	https://www.gem.wiki/Nabinagar_Super_Thermal_Power_Project	L100000102113	G100000107159	INE733E01010	1	1980		3	2061	2101	2141
coal	India	Asia	Southern Asia	Nabinagar Super Thermal Power Project	Unit 3		New Nabi Nagar	660	operating	2022		supercritical	unknown					Nabinagar Power Generating Company [100%]	NTPC Ltd [100.0%]	24.776	84.158	exact	Majhiyan and Ankorha	Nabinagar	Aurangabad	Bihar	https://www.gem.wiki/Nabinagar_Super_Thermal_Power_Project	L100000102113	G100000107160	INE733E01010	1	1980	1980	2	2062	2102	2142
coal	India	Asia	Southern Asia	Nabinagar Thermal Power Project	Unit 1		Nabi Nagar TPP	250	operating	2016		subcritical	unknown					Bhartiya Rail Bijlee [100%]	NTPC Ltd [74.0%]; Indian Railways [26.0%]	24.7051	84.0887	exact	Dhundwa	Nabinagar	Aurangabad	Bihar	https://www.gem.wiki/Nabinagar_Thermal_Power_Project	L100000102114	G100000107161	INE733E01010	0.74	1000		8	2056	2096	2136
coal	India	Asia	Southern Asia	Nabinagar Thermal Power Project	Unit 2		Nabi Nagar TPP	250	operating	2017		subcritical	unknown					Bhartiya Rail Bijlee [100%]	NTPC Ltd [74.0%]; Indian Railways [26.0%]	24.7051	84.0887	exact	Dhundwa	Nabinagar	Aurangabad	Bihar	https://www.gem.wiki/Nabinagar_Thermal_Power_Project	L100000102114	G100000107162	INE733E01010	0.74	1000		7	2057	2097	2137
coal	India	Asia	Southern Asia	Nabinagar Thermal Power Project	Unit 3		Nabi Nagar TPP	250	operating	2019		subcritical	unknown					Bhartiya Rail Bijlee [100%]	NTPC Ltd [74.0%]; Indian Railways [26.0%]	24.7051	84.0887	exact	Dhundwa	Nabinagar	Aurangabad	Bihar	https://www.gem.wiki/Nabinagar_Thermal_Power_Project	L100000102114	G100000107163	INE733E01010	0.74	1000		5	2059	2099	2139
coal	India	Asia	Southern Asia	Nabinagar Thermal Power Project	Unit 4		Nabi Nagar TPP	250	operating	2021		subcritical	unknown					Bhartiya Rail Bijlee [100%]	NTPC Ltd [74.0%]; Indian Railways [26.0%]	24.7051	84.0887	exact	Dhundwa	Nabinagar	Aurangabad	Bihar	https://www.gem.wiki/Nabinagar_Thermal_Power_Project	L100000102114	G100000107164	INE733E01010	0.74	1000	1000	3	2061	2101	2141
coal	India	Asia	Southern Asia	NALCO Gajmara power station	Phase I			1400	cancelled			unknown	unknown					Gajamara Power Project [100%]	National Aluminium Co Ltd; NTPC Ltd	20.6562	85.6043	approximate	Gajmara		Dhenkanal	Odisha	https://www.gem.wiki/NALCO_Gajmara_power_station	L100000102482	G100000112745	INE733E01010	0.5	2400		-99	40	80	120
coal	India	Asia	Southern Asia	NALCO Gajmara power station	Phase II			1000	cancelled			unknown	unknown					Gajamara Power Project [100%]	National Aluminium Co Ltd; NTPC Ltd	20.6562	85.6043	approximate	Gajmara		Dhenkanal	Odisha	https://www.gem.wiki/NALCO_Gajmara_power_station	L100000102482	G100000113125	INE733E01010	0.5	2400	2400	-99	40	80	120
coal	India	Asia	Southern Asia	National Capital Dadri Thermal Power Plant	Stage I Unit 1		NCTPP; NTPC Dadri	210	operating	1991		subcritical	unknown					NTPC [100%]	NTPC [100.0%]	28.603	77.6078	exact	Dadri	Dadri	Gautam Buddha Nagar	Uttar Pradesh	https://www.gem.wiki/National_Capital_Dadri_Thermal_Power_Plant	L100000102642	G100000107306	INE733E01010	1	1920		33	2031	2071	2111
coal	India	Asia	Southern Asia	National Capital Dadri Thermal Power Plant	Stage I Unit 2		NCTPP; NTPC Dadri	210	operating	1992		subcritical	unknown					NTPC [100%]	NTPC [100.0%]	28.603	77.6078	exact	Dadri	Dadri	Gautam Buddha Nagar	Uttar Pradesh	https://www.gem.wiki/National_Capital_Dadri_Thermal_Power_Plant	L100000102642	G100000107307	INE733E01010	1	1920		32	2032	2072	2112
coal	India	Asia	Southern Asia	National Capital Dadri Thermal Power Plant	Stage I Unit 3		NCTPP; NTPC Dadri	210	operating	1993		subcritical	unknown					NTPC [100%]	NTPC [100.0%]	28.603	77.6078	exact	Dadri	Dadri	Gautam Buddha Nagar	Uttar Pradesh	https://www.gem.wiki/National_Capital_Dadri_Thermal_Power_Plant	L100000102642	G100000107308	INE733E01010	1	1920		31	2033	2073	2113
coal	India	Asia	Southern Asia	National Capital Dadri Thermal Power Plant	Stage I Unit 4		NCTPP; NTPC Dadri	210	operating	1994		subcritical	unknown					NTPC [100%]	NTPC [100.0%]	28.603	77.6078	exact	Dadri	Dadri	Gautam Buddha Nagar	Uttar Pradesh	https://www.gem.wiki/National_Capital_Dadri_Thermal_Power_Plant	L100000102642	G100000107309	INE733E01010	1	1920		30	2034	2074	2114
coal	India	Asia	Southern Asia	National Capital Dadri Thermal Power Plant	Stage II Unit 5		NCTPP; NTPC Dadri	490	operating	2010		subcritical	unknown					NTPC [100%]	NTPC [100.0%]	28.603	77.6078	exact	Dadri	Dadri	Gautam Budh Nagar	Uttar Pradesh	https://www.gem.wiki/National_Capital_Dadri_Thermal_Power_Plant	L100000102642	G100000107310	INE733E01010	1	1920		14	2050	2090	2130
coal	India	Asia	Southern Asia	National Capital Dadri Thermal Power Plant	Stage II Unit 6		NCTPP; NTPC Dadri	490	operating	2010		subcritical	unknown					NTPC [100%]	NTPC [100.0%]	28.603	77.6078	exact	Dadri	Dadri	Gautam Budh Nagar	Uttar Pradesh	https://www.gem.wiki/National_Capital_Dadri_Thermal_Power_Plant	L100000102642	G100000107311	INE733E01010	1	1920		14	2050	2090	2130
coal	India	Asia	Southern Asia	National Capital Dadri Thermal Power Plant	IGCC demonstration		NCTPP; NTPC Dadri	100	cancelled			IGCC	unknown					NTPC [100%]	NTPC [100.0%]	28.603	77.6078	exact	Dadri	Dadri	Gautam Budh Nagar	Uttar Pradesh	https://www.gem.wiki/National_Capital_Dadri_Thermal_Power_Plant	L100000102642	G100000107338	INE733E01010	1	1920	1920	-99	40	80	120
coal	India	Asia	Southern Asia	North Karanpura power station	Unit 1			660	operating	2023		supercritical	unknown					NTPC [100%]	NTPC [100.0%]	23.8508	85.0124	exact	Tandwa town		Chatra	Jharkhand	https://www.gem.wiki/North_Karanpura_power_station	L100000102278	G100000107506	INE733E01010	1	1980		1	2063	2103	2143
coal	India	Asia	Southern Asia	North Karanpura power station	Unit 2			660	construction	2024		supercritical	unknown					NTPC [100%]	NTPC [100.0%]	23.8508	85.0124	exact	Tandwa town		Chatra	Jharkhand	https://www.gem.wiki/North_Karanpura_power_station	L100000102278	G100000107507	INE733E01010	1	1980		0	2064	2104	2144
coal	India	Asia	Southern Asia	North Karanpura power station	Unit 3			660	construction	2024		supercritical	unknown					NTPC [100%]	NTPC [100.0%]	23.8508	85.0124	exact	Tandwa town		Chatra	Jharkhand	https://www.gem.wiki/North_Karanpura_power_station	L100000102278	G100000107508	INE733E01010	1	1980	1980	0	2064	2104	2144
coal	India	Asia	Southern Asia	NTPC Seoni power station	Phase 1		Jhabua Power Seoni power station	600	operating	2016		subcritical	unknown					Jhabua Power [100%]	NTPC Ltd [50.0%]; other unknown/mixed entity types [41.3%]; Yes Bank Ltd [8.7%]	22.7355	79.9123	exact	Barela and Gorakhpur	Ghansore	Seoni	Madhya Pradesh	https://www.gem.wiki/NTPC_Seoni_power_station	L100000102340	G100000105026	INE733E01010	0.5	1200		8	2056	2096	2136
coal	India	Asia	Southern Asia	NTPC Seoni power station	Phase 2		Jhabua Power Seoni power station	600	permitted			subcritical	unknown					Jhabua Power [100%]	NTPC Ltd [50.0%]; other unknown/mixed entity types [41.3%]; Yes Bank Ltd [8.7%]	22.7355	79.9123	exact	Barela and Gorakhpur	Ghansore	Seoni	Madhya Pradesh	https://www.gem.wiki/NTPC_Seoni_power_station	L100000102340	G100000105027	INE733E01010	0.5	1200	1200	-99	40	80	120
coal	India	Asia	Southern Asia	Obra Thermal Power Station	D Unit 1			800	announced	2027		ultra-supercritical	unknown					State of Uttar Pradesh [50%]; NTPC [50%]	NTPC [50.0%]; State of Uttar Pradesh [50.0%]	24.4445	82.98	exact			Sonbhadra	Uttar Pradesh	https://www.gem.wiki/Obra_Thermal_Power_Station	L100000102644	G100000115946	INE733E01010	0.5	1600		-3	2067	2107	2147
coal	India	Asia	Southern Asia	Obra Thermal Power Station	D Unit 2			800	announced	2028		ultra-supercritical	unknown					State of Uttar Pradesh [50%]; NTPC [50%]	NTPC [50.0%]; State of Uttar Pradesh [50.0%]	24.4445	82.98	exact			Sonbhadra	Uttar Pradesh	https://www.gem.wiki/Obra_Thermal_Power_Station	L100000102644	G100000115947	INE733E01010	0.5	1600	1600	-4	2068	2108	2148
coal	India	Asia	Southern Asia	Patratu JSEB power station	Unit 1		Patratu UMPP	50	retired	1966	2017	subcritical	bituminous					Patratu Vidyut Utpadan Nigam [100%]	NTPC Ltd [74.0%]; Jharkhand Bijli Vitran Nigam Ltd [26.0%]	23.64	85.2931	exact	Patratu	Patratu	Ramgarh	Jharkhand	https://www.gem.wiki/Patratu_JSEB_power_station	L100000102281	G100000107868	INE733E01010	0.74	4840		58	2006	2046	2086
coal	India	Asia	Southern Asia	Patratu JSEB power station	Unit 2		Patratu UMPP	50	retired	1967	2017	subcritical	bituminous					Patratu Vidyut Utpadan Nigam [100%]	NTPC Ltd [74.0%]; Jharkhand Bijli Vitran Nigam Ltd [26.0%]	23.64	85.2931	exact	Patratu	Patratu	Ramgarh	Jharkhand	https://www.gem.wiki/Patratu_JSEB_power_station	L100000102281	G100000107875	INE733E01010	0.74	4840		57	2007	2047	2087
coal	India	Asia	Southern Asia	Patratu JSEB power station	Unit 3		Patratu UMPP	50	retired	1969	2017	subcritical	bituminous					Patratu Vidyut Utpadan Nigam [100%]	NTPC Ltd [74.0%]; Jharkhand Bijli Vitran Nigam Ltd [26.0%]	23.64	85.2931	exact	Patratu	Patratu	Ramgarh	Jharkhand	https://www.gem.wiki/Patratu_JSEB_power_station	L100000102281	G100000107876	INE733E01010	0.74	4840		55	2009	2049	2089
coal	India	Asia	Southern Asia	Patratu JSEB power station	Unit 4		Patratu UMPP	50	retired	1970	2017	subcritical	bituminous					Patratu Vidyut Utpadan Nigam [100%]	NTPC Ltd [74.0%]; Jharkhand Bijli Vitran Nigam Ltd [26.0%]	23.64	85.2931	exact	Patratu	Patratu	Ramgarh	Jharkhand	https://www.gem.wiki/Patratu_JSEB_power_station	L100000102281	G100000107877	INE733E01010	0.74	4840		54	2010	2050	2090
coal	India	Asia	Southern Asia	Patratu JSEB power station	Unit 5		Patratu UMPP	100	retired	1971	2017	subcritical	bituminous					Patratu Vidyut Utpadan Nigam [100%]	NTPC Ltd [74.0%]; Jharkhand Bijli Vitran Nigam Ltd [26.0%]	23.64	85.2931	exact	Patratu	Patratu	Ramgarh	Jharkhand	https://www.gem.wiki/Patratu_JSEB_power_station	L100000102281	G100000107878	INE733E01010	0.74	4840		53	2011	2051	2091
coal	India	Asia	Southern Asia	Patratu JSEB power station	Unit 6		Patratu UMPP	100	retired	1972	2017	subcritical	bituminous					Patratu Vidyut Utpadan Nigam [100%]	NTPC Ltd [74.0%]; Jharkhand Bijli Vitran Nigam Ltd [26.0%]	23.64	85.2931	exact	Patratu	Patratu	Ramgarh	Jharkhand	https://www.gem.wiki/Patratu_JSEB_power_station	L100000102281	G100000107879	INE733E01010	0.74	4840		52	2012	2052	2092
coal	India	Asia	Southern Asia	Patratu JSEB power station	Unit 7		Patratu UMPP	110	retired	1977	2017	subcritical	bituminous					Patratu Vidyut Utpadan Nigam [100%]	NTPC Ltd [74.0%]; Jharkhand Bijli Vitran Nigam Ltd [26.0%]	23.64	85.2931	exact	Patratu	Patratu	Ramgarh	Jharkhand	https://www.gem.wiki/Patratu_JSEB_power_station	L100000102281	G100000107880	INE733E01010	0.74	4840		47	2017	2057	2097
coal	India	Asia	Southern Asia	Patratu JSEB power station	Unit 8		Patratu UMPP	110	retired	1978	2017	subcritical	bituminous					Patratu Vidyut Utpadan Nigam [100%]	NTPC Ltd [74.0%]; Jharkhand Bijli Vitran Nigam Ltd [26.0%]	23.64	85.2931	exact	Patratu	Patratu	Ramgarh	Jharkhand	https://www.gem.wiki/Patratu_JSEB_power_station	L100000102281	G100000107881	INE733E01010	0.74	4840		46	2018	2058	2098
coal	India	Asia	Southern Asia	Patratu JSEB power station	Unit 9		Patratu UMPP	110	retired	1984	2017	subcritical	bituminous					Patratu Vidyut Utpadan Nigam [100%]	NTPC Ltd [74.0%]; Jharkhand Bijli Vitran Nigam Ltd [26.0%]	23.64	85.2931	exact	Patratu	Patratu	Ramgarh	Jharkhand	https://www.gem.wiki/Patratu_JSEB_power_station	L100000102281	G100000107882	INE733E01010	0.74	4840		40	2024	2064	2104
coal	India	Asia	Southern Asia	Patratu JSEB power station	Unit 10		Patratu UMPP	110	retired	1986	2017	subcritical	bituminous					Patratu Vidyut Utpadan Nigam [100%]	NTPC Ltd [74.0%]; Jharkhand Bijli Vitran Nigam Ltd [26.0%]	23.64	85.2931	exact	Patratu	Patratu	Ramgarh	Jharkhand	https://www.gem.wiki/Patratu_JSEB_power_station	L100000102281	G100000107869	INE733E01010	0.74	4840		38	2026	2066	2106
coal	India	Asia	Southern Asia	Patratu JSEB power station	Unit 11		Patratu UMPP	800	construction	2024		supercritical	unknown					Jharkhand State Electricity Board; NTPC	Jharkhand State Electricity Board; NTPC	23.64	85.2931	exact	Patratu	Patratu	Ramgarh	Jharkhand	https://www.gem.wiki/Patratu_JSEB_power_station	L100000102281	G100000107870	INE733E01010	0.5	4840		0	2064	2104	2144
coal	India	Asia	Southern Asia	Patratu JSEB power station	Unit 12		Patratu UMPP	800	construction	2025		supercritical	unknown					Jharkhand State Electricity Board; NTPC	Jharkhand State Electricity Board; NTPC	23.64	85.2931	exact	Patratu	Patratu	Ramgarh	Jharkhand	https://www.gem.wiki/Patratu_JSEB_power_station	L100000102281	G100000107871	INE733E01010	0.5	4840		-1	2065	2105	2145
coal	India	Asia	Southern Asia	Patratu JSEB power station	Unit 13		Patratu UMPP	800	construction	2025		supercritical	unknown					Jharkhand State Electricity Board; NTPC	Jharkhand State Electricity Board; NTPC	23.64	85.2931	exact	Patratu	Patratu	Ramgarh	Jharkhand	https://www.gem.wiki/Patratu_JSEB_power_station	L100000102281	G100000107872	INE733E01010	0.5	4840		-1	2065	2105	2145
coal	India	Asia	Southern Asia	Patratu JSEB power station	Unit 14		Patratu UMPP	800	cancelled			supercritical	unknown					Jharkhand State Electricity Board; NTPC	Jharkhand State Electricity Board; NTPC	23.64	85.2931	exact	Patratu	Patratu	Ramgarh	Jharkhand	https://www.gem.wiki/Patratu_JSEB_power_station	L100000102281	G100000107873	INE733E01010	0.5	4840		-99	40	80	120
coal	India	Asia	Southern Asia	Patratu JSEB power station	Unit 15		Patratu UMPP	800	cancelled			supercritical	unknown					Jharkhand State Electricity Board; NTPC	Jharkhand State Electricity Board; NTPC	23.64	85.2931	exact	Patratu	Patratu	Ramgarh	Jharkhand	https://www.gem.wiki/Patratu_JSEB_power_station	L100000102281	G100000107874	INE733E01010	0.5	4840	4840	-99	40	80	120
coal	India	Asia	Southern Asia	Pudimadaka Ultra Mega Power Project	Unit 1			800	cancelled			supercritical	unknown					NTPC [100%]	NTPC [100.0%]	17.4927	83.0028	approximate	Pudimadaka	Achutapuram	Visakhapatnam	Andhra Pradesh	https://www.gem.wiki/Pudimadaka_Ultra_Mega_Power_Project	L100000102065	G100000108197	INE733E01010	1	4000		-99	40	80	120
coal	India	Asia	Southern Asia	Pudimadaka Ultra Mega Power Project	Unit 2			800	cancelled			supercritical	unknown					NTPC [100%]	NTPC [100.0%]	17.4927	83.0028	approximate	Pudimadaka	Achutapuram	Visakhapatnam	Andhra Pradesh	https://www.gem.wiki/Pudimadaka_Ultra_Mega_Power_Project	L100000102065	G100000108198	INE733E01010	1	4000		-99	40	80	120
coal	India	Asia	Southern Asia	Pudimadaka Ultra Mega Power Project	Unit 3			800	cancelled			supercritical	unknown					NTPC [100%]	NTPC [100.0%]	17.4927	83.0028	approximate	Pudimadaka	Achutapuram	Visakhapatnam	Andhra Pradesh	https://www.gem.wiki/Pudimadaka_Ultra_Mega_Power_Project	L100000102065	G100000108199	INE733E01010	1	4000		-99	40	80	120
coal	India	Asia	Southern Asia	Pudimadaka Ultra Mega Power Project	Unit 4			800	cancelled			supercritical	unknown					NTPC [100%]	NTPC [100.0%]	17.4927	83.0028	approximate	Pudimadaka	Achutapuram	Visakhapatnam	Andhra Pradesh	https://www.gem.wiki/Pudimadaka_Ultra_Mega_Power_Project	L100000102065	G100000108200	INE733E01010	1	4000		-99	40	80	120
coal	India	Asia	Southern Asia	Pudimadaka Ultra Mega Power Project	Unit 5			800	cancelled			supercritical	unknown					NTPC [100%]	NTPC [100.0%]	17.4927	83.0028	approximate	Pudimadaka	Achutapuram	Visakhapatnam	Andhra Pradesh	https://www.gem.wiki/Pudimadaka_Ultra_Mega_Power_Project	L100000102065	G100000108201	INE733E01010	1	4000	4000	-99	40	80	120
coal	India	Asia	Southern Asia	Ramagundam power station	Stage I Unit 1		Telangana TPP (Stage IV Unit 8, Stage IV Unit 9, Stage V Unit 10, Stage V Unit 11, Stage V Unit 12), Telangana super thermal power project (Stage IV Unit 8, Stage IV Unit 9, Stage V Unit 10, Stage V Unit 11, Stage V Unit 12)	200	operating	1983		subcritical	bituminous					NTPC [100%]	NTPC [100.0%]	18.7585	79.4573	exact	Ramagundam	Ramagundam	Karimnagar	Telangana	https://www.gem.wiki/Ramagundam_power_station	L100000102602	G100000108463	INE733E01010	1	6600		41	2023	2063	2103
coal	India	Asia	Southern Asia	Ramagundam power station	Stage I Unit 2		Telangana TPP (Stage IV Unit 8, Stage IV Unit 9, Stage V Unit 10, Stage V Unit 11, Stage V Unit 12), Telangana super thermal power project (Stage IV Unit 8, Stage IV Unit 9, Stage V Unit 10, Stage V Unit 11, Stage V Unit 12)	200	operating	1984		subcritical	bituminous					NTPC [100%]	NTPC [100.0%]	18.7585	79.4573	exact	Ramagundam	Ramagundam	Karimnagar	Telangana	https://www.gem.wiki/Ramagundam_power_station	L100000102602	G100000108464	INE733E01010	1	6600		40	2024	2064	2104
coal	India	Asia	Southern Asia	Ramagundam power station	Stage I Unit 3		Telangana TPP (Stage IV Unit 8, Stage IV Unit 9, Stage V Unit 10, Stage V Unit 11, Stage V Unit 12), Telangana super thermal power project (Stage IV Unit 8, Stage IV Unit 9, Stage V Unit 10, Stage V Unit 11, Stage V Unit 12)	200	operating	1984		subcritical	bituminous					NTPC [100%]	NTPC [100.0%]	18.7585	79.4573	exact	Ramagundam	Ramagundam	Karimnagar	Telangana	https://www.gem.wiki/Ramagundam_power_station	L100000102602	G100000108465	INE733E01010	1	6600		40	2024	2064	2104
coal	India	Asia	Southern Asia	Ramagundam power station	Stage II Unit 4		Telangana TPP (Stage IV Unit 8, Stage IV Unit 9, Stage V Unit 10, Stage V Unit 11, Stage V Unit 12), Telangana super thermal power project (Stage IV Unit 8, Stage IV Unit 9, Stage V Unit 10, Stage V Unit 11, Stage V Unit 12)	500	operating	1988		subcritical	bituminous					NTPC [100%]	NTPC [100.0%]	18.7585	79.4573	exact	Ramagundam	Ramagundam	Karimnagar	Telangana	https://www.gem.wiki/Ramagundam_power_station	L100000102602	G100000108466	INE733E01010	1	6600		36	2028	2068	2108
coal	India	Asia	Southern Asia	Ramagundam power station	Stage II Unit 5		Telangana TPP (Stage IV Unit 8, Stage IV Unit 9, Stage V Unit 10, Stage V Unit 11, Stage V Unit 12), Telangana super thermal power project (Stage IV Unit 8, Stage IV Unit 9, Stage V Unit 10, Stage V Unit 11, Stage V Unit 12)	500	operating	1989		subcritical	bituminous					NTPC [100%]	NTPC [100.0%]	18.7585	79.4573	exact	Ramagundam	Ramagundam	Karimnagar	Telangana	https://www.gem.wiki/Ramagundam_power_station	L100000102602	G100000108467	INE733E01010	1	6600		35	2029	2069	2109
coal	India	Asia	Southern Asia	Ramagundam power station	Stage II Unit 6		Telangana TPP (Stage IV Unit 8, Stage IV Unit 9, Stage V Unit 10, Stage V Unit 11, Stage V Unit 12), Telangana super thermal power project (Stage IV Unit 8, Stage IV Unit 9, Stage V Unit 10, Stage V Unit 11, Stage V Unit 12)	500	operating	1989		subcritical	bituminous					NTPC [100%]	NTPC [100.0%]	18.7585	79.4573	exact	Ramagundam	Ramagundam	Karimnagar	Telangana	https://www.gem.wiki/Ramagundam_power_station	L100000102602	G100000108468	INE733E01010	1	6600		35	2029	2069	2109
coal	India	Asia	Southern Asia	Ramagundam power station	Stage III Unit 7		Telangana TPP (Stage IV Unit 8, Stage IV Unit 9, Stage V Unit 10, Stage V Unit 11, Stage V Unit 12), Telangana super thermal power project (Stage IV Unit 8, Stage IV Unit 9, Stage V Unit 10, Stage V Unit 11, Stage V Unit 12)	500	operating	2005		subcritical	bituminous					NTPC [100%]	NTPC [100.0%]	18.7585	79.4573	exact	Ramagundam	Ramagundam	Karimnagar	Telangana	https://www.gem.wiki/Ramagundam_power_station	L100000102602	G100000108469	INE733E01010	1	6600		19	2045	2085	2125
coal	India	Asia	Southern Asia	Ramagundam power station	Stage IV Unit 8		Telangana TPP (Stage IV Unit 8, Stage IV Unit 9, Stage V Unit 10, Stage V Unit 11, Stage V Unit 12), Telangana super thermal power project (Stage IV Unit 8, Stage IV Unit 9, Stage V Unit 10, Stage V Unit 11, Stage V Unit 12)	800	operating	2023		supercritical	unknown					NTPC [100%]	NTPC [100.0%]	18.751	79.4722	exact	Ramagundam	Ramagundam	Karimnagar	Telangana	https://www.gem.wiki/Ramagundam_power_station	L100000102602	G100000108470	INE733E01010	1	6600		1	2063	2103	2143
coal	India	Asia	Southern Asia	Ramagundam power station	Stage IV Unit 9		Telangana TPP (Stage IV Unit 8, Stage IV Unit 9, Stage V Unit 10, Stage V Unit 11, Stage V Unit 12), Telangana super thermal power project (Stage IV Unit 8, Stage IV Unit 9, Stage V Unit 10, Stage V Unit 11, Stage V Unit 12)	800	construction	2024		supercritical	unknown					NTPC [100%]	NTPC [100.0%]	18.751	79.4722	exact	Ramagundam	Ramagundam	Karimnagar	Telangana	https://www.gem.wiki/Ramagundam_power_station	L100000102602	G100000108471	INE733E01010	1	6600		0	2064	2104	2144
coal	India	Asia	Southern Asia	Ramagundam power station	Stage V Unit 10		Telangana TPP (Stage IV Unit 8, Stage IV Unit 9, Stage V Unit 10, Stage V Unit 11, Stage V Unit 12), Telangana super thermal power project (Stage IV Unit 8, Stage IV Unit 9, Stage V Unit 10, Stage V Unit 11, Stage V Unit 12)	800	cancelled			supercritical	unknown					NTPC [100%]	NTPC [100.0%]	18.751	79.4722	exact	Ramagundam	Ramagundam	Karimnagar	Telangana	https://www.gem.wiki/Ramagundam_power_station	L100000102602	G100000111885	INE733E01010	1	6600		-99	40	80	120
coal	India	Asia	Southern Asia	Ramagundam power station	Stage V Unit 11		Telangana TPP (Stage IV Unit 8, Stage IV Unit 9, Stage V Unit 10, Stage V Unit 11, Stage V Unit 12), Telangana super thermal power project (Stage IV Unit 8, Stage IV Unit 9, Stage V Unit 10, Stage V Unit 11, Stage V Unit 12)	800	cancelled			supercritical	unknown					NTPC [100%]	NTPC [100.0%]	18.751	79.4722	exact	Ramagundam	Ramagundam	Karimnagar	Telangana	https://www.gem.wiki/Ramagundam_power_station	L100000102602	G100000114262	INE733E01010	1	6600		-99	40	80	120
coal	India	Asia	Southern Asia	Ramagundam power station	Stage V Unit 12		Telangana TPP (Stage IV Unit 8, Stage IV Unit 9, Stage V Unit 10, Stage V Unit 11, Stage V Unit 12), Telangana super thermal power project (Stage IV Unit 8, Stage IV Unit 9, Stage V Unit 10, Stage V Unit 11, Stage V Unit 12)	800	cancelled			supercritical	unknown					NTPC [100%]	NTPC [100.0%]	18.751	79.4722	exact	Ramagundam	Ramagundam	Karimnagar	Telangana	https://www.gem.wiki/Ramagundam_power_station	L100000102602	G100000114263	INE733E01010	1	6600	6600	-99	40	80	120
coal	Bangladesh	Asia	Southern Asia	Rampal power station	Unit 1		Maitree Super Thermal Power Project, Khulna Large power station, Khulna South power station	660	operating	2022		supercritical	unknown					Bangladesh India Friendship Power Company [100%]	Bangladesh Power Development Board [50.0%]; NTPC Ltd [50.0%]	22.5925	89.5564	exact	Rampal		Bagerhat	Khulna	https://www.gem.wiki/Rampal_power_station	L100000100077	G100000108473	INE733E01010	0.5	2640		2	2062	2102	2142
coal	Bangladesh	Asia	Southern Asia	Rampal power station	Unit 2		Maitree Super Thermal Power Project, Khulna Large power station, Khulna South power station	660	construction	2023		supercritical	unknown					Bangladesh India Friendship Power Company [100%]	Bangladesh Power Development Board [50.0%]; NTPC Ltd [50.0%]	22.5925	89.5564	exact	Rampal		Bagerhat	Khulna	https://www.gem.wiki/Rampal_power_station	L100000100077	G100000108474	INE733E01010	0.5	2640		1	2063	2103	2143
coal	Bangladesh	Asia	Southern Asia	Rampal power station	Unit 3		Maitree Super Thermal Power Project, Khulna Large power station, Khulna South power station	660	cancelled			unknown	unknown					Bangladesh India Friendship Power Company [100%]	Bangladesh Power Development Board [50.0%]; NTPC Ltd [50.0%]	22.5925	89.5564	exact	Rampal		Bagerhat	Khulna	https://www.gem.wiki/Rampal_power_station	L100000100077	G100000112636	INE733E01010	0.5	2640		-99	40	80	120
coal	Bangladesh	Asia	Southern Asia	Rampal power station	Unit 4		Maitree Super Thermal Power Project, Khulna Large power station, Khulna South power station	660	cancelled			unknown	unknown					Bangladesh India Friendship Power Company [100%]	Bangladesh Power Development Board [50.0%]; NTPC Ltd [50.0%]	22.5925	89.5564	exact	Rampal		Bagerhat	Khulna	https://www.gem.wiki/Rampal_power_station	L100000100077	G100000112637	INE733E01010	0.5	2640	2640	-99	40	80	120
coal	India	Asia	Southern Asia	Rihand power station	Unit 1			500	operating	1988		subcritical	bituminous					NTPC [100%]	NTPC [100.0%]	24.027	82.7915	exact	Rihandnagar	Dudhi	Sonbhadra	Uttar Pradesh	https://www.gem.wiki/Rihand_power_station	L100000102649	G100000108573	INE733E01010	1	3000		36	2028	2068	2108
coal	India	Asia	Southern Asia	Rihand power station	Unit 2			500	operating	1989		subcritical	bituminous					NTPC [100%]	NTPC [100.0%]	24.027	82.7915	exact	Rihandnagar	Dudhi	Sonbhadra	Uttar Pradesh	https://www.gem.wiki/Rihand_power_station	L100000102649	G100000108574	INE733E01010	1	3000		35	2029	2069	2109
coal	India	Asia	Southern Asia	Rihand power station	Unit 3			500	operating	2005		subcritical	bituminous					NTPC [100%]	NTPC [100.0%]	24.027	82.7915	exact	Rihandnagar	Dudhi	Sonbhadra	Uttar Pradesh	https://www.gem.wiki/Rihand_power_station	L100000102649	G100000108575	INE733E01010	1	3000		19	2045	2085	2125
coal	India	Asia	Southern Asia	Rihand power station	Unit 4			500	operating	2005		subcritical	bituminous					NTPC [100%]	NTPC [100.0%]	24.027	82.7915	exact	Rihandnagar	Dudhi	Sonbhadra	Uttar Pradesh	https://www.gem.wiki/Rihand_power_station	L100000102649	G100000108576	INE733E01010	1	3000		19	2045	2085	2125
coal	India	Asia	Southern Asia	Rihand power station	Unit 5			500	operating	2012		subcritical	bituminous					NTPC [100%]	NTPC [100.0%]	24.027	82.7915	exact	Rihandnegar	Dudhi	Sonebhadra	Uttar Pradesh	https://www.gem.wiki/Rihand_power_station	L100000102649	G100000108577	INE733E01010	1	3000		12	2052	2092	2132
coal	India	Asia	Southern Asia	Rihand power station	Unit 6			500	operating	2013		subcritical	bituminous					NTPC [100%]	NTPC [100.0%]	24.027	82.7915	exact	Rihandnegar	Dudhi	Sonebhadra	Uttar Pradesh	https://www.gem.wiki/Rihand_power_station	L100000102649	G100000108578	INE733E01010	1	3000	3000	11	2053	2093	2133
coal	India	Asia	Southern Asia	Rourkela Works-2 power station	Unit 1		Rourkela power station	60	operating	1987		subcritical	bituminous					NTPC-SAIL Power [100%]	NTPC Ltd [50.0%]; Steel Authority of India Ltd [50.0%]	22.221	84.8806	exact	SAIL Rourkela steel mill		Sundargarh	Odisha	https://www.gem.wiki/Rourkela_Works-2_power_station	L100000102494	G100000108643	INE733E01010	0.5	370		37	2027	2067	2107
coal	India	Asia	Southern Asia	Rourkela Works-2 power station	Unit 2		Rourkela power station	60	operating	1988		subcritical	bituminous					NTPC-SAIL Power [100%]	NTPC Ltd [50.0%]; Steel Authority of India Ltd [50.0%]	22.221	84.8806	exact	SAIL Rourkela steel mill		Sundargarh	Odisha	https://www.gem.wiki/Rourkela_Works-2_power_station	L100000102494	G100000108644	INE733E01010	0.5	370		36	2028	2068	2108
coal	India	Asia	Southern Asia	Rourkela Works-2 power station	Unit 3		Rourkela power station	250	operating	2022		subcritical	bituminous					NTPC-SAIL Power [100%]	NTPC Ltd [50.0%]; Steel Authority of India Ltd [50.0%]	22.221	84.8806	exact	SAIL Rourkela steel mill		Sundargarh	Odisha	https://www.gem.wiki/Rourkela_Works-2_power_station	L100000102494	G100000113412	INE733E01010	0.5	370	370	2	2062	2102	2142
coal	Sri Lanka	Asia	Southern Asia	Sampur power station	Unit 1		Trincomalee Coal Power Station	300	cancelled			subcritical	unknown					Trincomalee Power [100%]	Ceylon Electricity Board [50.0%]; NTPC Ltd [50.0%]	8.48611	81.3	exact	Sampur		Trincomalee	Eastern	https://www.gem.wiki/Sampur_power_station	L100000103519	G100000108772	INE733E01010	0.5	1700		-99	40	80	120
coal	Sri Lanka	Asia	Southern Asia	Sampur power station	Unit 2		Trincomalee Coal Power Station	300	cancelled			subcritical	unknown					Trincomalee Power [100%]	Ceylon Electricity Board [50.0%]; NTPC Ltd [50.0%]	8.48611	81.3	exact	Sampur		Trincomalee	Eastern	https://www.gem.wiki/Sampur_power_station	L100000103519	G100000108773	INE733E01010	0.5	1700		-99	40	80	120
coal	Sri Lanka	Asia	Southern Asia	Sampur power station	Unit 3		Trincomalee Coal Power Station	250	cancelled			unknown	unknown					Trincomalee Power [100%]	Ceylon Electricity Board [50.0%]; NTPC Ltd [50.0%]	8.48611	81.3	exact	Sampur		Trincomalee	Eastern	https://www.gem.wiki/Sampur_power_station	L100000103519	G100000108774	INE733E01010	0.5	1700		-99	40	80	120
coal	Sri Lanka	Asia	Southern Asia	Sampur power station	Unit 4		Trincomalee Coal Power Station	250	cancelled			unknown	unknown					Trincomalee Power [100%]	Ceylon Electricity Board [50.0%]; NTPC Ltd [50.0%]	8.48611	81.3	exact	Sampur		Trincomalee	Eastern	https://www.gem.wiki/Sampur_power_station	L100000103519	G100000108775	INE733E01010	0.5	1700		-99	40	80	120
coal	Sri Lanka	Asia	Southern Asia	Sampur power station	Unit 5		Trincomalee Coal Power Station	300	cancelled			unknown	unknown					Trincomalee Power [100%]	Ceylon Electricity Board [50.0%]; NTPC Ltd [50.0%]	8.48611	81.3	exact	Sampur		Trincomalee	Eastern	https://www.gem.wiki/Sampur_power_station	L100000103519	G100000108776	INE733E01010	0.5	1700		-99	40	80	120
coal	Sri Lanka	Asia	Southern Asia	Sampur power station	Unit 6		Trincomalee Coal Power Station	300	cancelled			unknown	unknown					Trincomalee Power [100%]	Ceylon Electricity Board [50.0%]; NTPC Ltd [50.0%]	8.48611	81.3	exact	Sampur		Trincomalee	Eastern	https://www.gem.wiki/Sampur_power_station	L100000103519	G100000108777	INE733E01010	0.5	1700	1700	-99	40	80	120
coal	India	Asia	Southern Asia	Santaldih Thermal Power Station	Unit 1			120	retired	1974	2010	subcritical	bituminous					NTPC [100%]	NTPC [100.0%]	23.6013	86.4666	exact	Santaldih	Ragunathpur	Purulia	West Bengal	https://www.gem.wiki/Santaldih_Thermal_Power_Station	L100000102686	G100000108808	INE733E01010	1	1980		50	2014	2054	2094
coal	India	Asia	Southern Asia	Santaldih Thermal Power Station	Unit 2			120	retired	1975	2010	subcritical	bituminous					NTPC [100%]	NTPC [100.0%]	23.6013	86.4666	exact	Santaldih	Ragunathpur	Purulia	West Bengal	https://www.gem.wiki/Santaldih_Thermal_Power_Station	L100000102686	G100000108809	INE733E01010	1	1980		49	2015	2055	2095
coal	India	Asia	Southern Asia	Santaldih Thermal Power Station	Unit 3			120	retired	1978	2009	subcritical	bituminous					NTPC [100%]	NTPC [100.0%]	23.6013	86.4666	exact	Santaldih	Ragunathpur	Purulia	West Bengal	https://www.gem.wiki/Santaldih_Thermal_Power_Station	L100000102686	G100000108810	INE733E01010	1	1980		46	2018	2058	2098
coal	India	Asia	Southern Asia	Santaldih Thermal Power Station	Unit 4			120	retired	1981	2008	subcritical	bituminous					NTPC [100%]	NTPC [100.0%]	23.6013	86.4666	exact	Santaldih	Ragunathpur	Purulia	West Bengal	https://www.gem.wiki/Santaldih_Thermal_Power_Station	L100000102686	G100000108811	INE733E01010	1	1980		43	2021	2061	2101
coal	India	Asia	Southern Asia	Santaldih Thermal Power Station	Unit 5			250	operating	2007		subcritical	bituminous					NTPC [100%]	NTPC [100.0%]	23.6013	86.4666	exact	Santaldih	Ragunathpur	Purulia	West Bengal	https://www.gem.wiki/Santaldih_Thermal_Power_Station	L100000102686	G100000108812	INE733E01010	1	1980		17	2047	2087	2127
coal	India	Asia	Southern Asia	Santaldih Thermal Power Station	Unit 6			250	operating	2011		subcritical	bituminous					NTPC [100%]	NTPC [100.0%]	23.6013	86.4666	exact	Santildih	Ragunathpur	Purulia	West Bengal	https://www.gem.wiki/Santaldih_Thermal_Power_Station	L100000102686	G100000108813	INE733E01010	1	1980		13	2051	2091	2131
coal	India	Asia	Southern Asia	Santaldih Thermal Power Station	Unit 7			500	cancelled			supercritical	unknown					NTPC [100%]	NTPC [100.0%]	23.6013	86.4666	exact	Santildih	Ragunathpur	Purulia	West Bengal	https://www.gem.wiki/Santaldih_Thermal_Power_Station	L100000102686	G100000108814	INE733E01010	1	1980		-99	40	80	120
coal	India	Asia	Southern Asia	Santaldih Thermal Power Station	Unit 8			500	cancelled			supercritical	unknown					NTPC [100%]	NTPC [100.0%]	23.6013	86.4666	exact	Santildih	Ragunathpur	Purulia	West Bengal	https://www.gem.wiki/Santaldih_Thermal_Power_Station	L100000102686	G100000108815	INE733E01010	1	1980	1980	-99	40	80	120
coal	India	Asia	Southern Asia	Simhadri power station	Unit 1			500	operating	2002		subcritical	bituminous					NTPC [100%]	NTPC [100.0%]	17.591	83.0917	exact			Visakhapatnam	Andhra Pradesh	https://www.gem.wiki/Simhadri_power_station	L100000102068	G100000109391	INE733E01010	1	3320		22	2042	2082	2122
coal	India	Asia	Southern Asia	Simhadri power station	Unit 2			500	operating	2002		subcritical	bituminous					NTPC [100%]	NTPC [100.0%]	17.591	83.0917	exact			Visakhapatnam	Andhra Pradesh	https://www.gem.wiki/Simhadri_power_station	L100000102068	G100000109392	INE733E01010	1	3320		22	2042	2082	2122
coal	India	Asia	Southern Asia	Simhadri power station	Unit 3			500	operating	2011		unknown	unknown					NTPC [100%]	NTPC [100.0%]	17.591	83.0917	exact	Vizag		Visakhapatnam	Andhra Pradesh	https://www.gem.wiki/Simhadri_power_station	L100000102068	G100000109393	INE733E01010	1	3320		13	2051	2091	2131
coal	India	Asia	Southern Asia	Simhadri power station	Unit 4			500	operating	2012		unknown	unknown					NTPC [100%]	NTPC [100.0%]	17.591	83.0917	exact	Vizag		Visakhapatnam	Andhra Pradesh	https://www.gem.wiki/Simhadri_power_station	L100000102068	G100000109394	INE733E01010	1	3320		12	2052	2092	2132
coal	India	Asia	Southern Asia	Simhadri power station	Unit 5			660	cancelled			supercritical	unknown					NTPC [100%]	NTPC [100.0%]	17.591	83.0917	exact	Vizag		Visakhapatnam	Andhra Pradesh	https://www.gem.wiki/Simhadri_power_station	L100000102068	G100000109395	INE733E01010	1	3320		-99	40	80	120
coal	India	Asia	Southern Asia	Simhadri power station	Unit 6			660	cancelled			supercritical	unknown					NTPC [100%]	NTPC [100.0%]	17.591	83.0917	exact	Vizag		Visakhapatnam	Andhra Pradesh	https://www.gem.wiki/Simhadri_power_station	L100000102068	G100000109396	INE733E01010	1	3320	3320	-99	40	80	120
coal	India	Asia	Southern Asia	Singrauli Super Thermal Power Station	Unit 1			200	operating	1982		subcritical	bituminous					NTPC [100%]	NTPC [100.0%]	24.1042	82.7064	exact	Shaktinagar	Dudhi	Sonbhadra	Uttar Pradesh	https://www.gem.wiki/Singrauli_Super_Thermal_Power_Station	L100000102652	G100000109413	INE733E01010	1	3600		42	2022	2062	2102
coal	India	Asia	Southern Asia	Singrauli Super Thermal Power Station	Unit 2			200	operating	1982		subcritical	bituminous					NTPC [100%]	NTPC [100.0%]	24.1042	82.7064	exact	Shaktinagar	Dudhi	Sonbhadra	Uttar Pradesh	https://www.gem.wiki/Singrauli_Super_Thermal_Power_Station	L100000102652	G100000109414	INE733E01010	1	3600		42	2022	2062	2102
coal	India	Asia	Southern Asia	Singrauli Super Thermal Power Station	Unit 3			200	operating	1983		subcritical	bituminous					NTPC [100%]	NTPC [100.0%]	24.1042	82.7064	exact	Shaktinagar	Dudhi	Sonbhadra	Uttar Pradesh	https://www.gem.wiki/Singrauli_Super_Thermal_Power_Station	L100000102652	G100000109415	INE733E01010	1	3600		41	2023	2063	2103
coal	India	Asia	Southern Asia	Singrauli Super Thermal Power Station	Unit 4			200	operating	1983		subcritical	bituminous					NTPC [100%]	NTPC [100.0%]	24.1042	82.7064	exact	Shaktinagar	Dudhi	Sonbhadra	Uttar Pradesh	https://www.gem.wiki/Singrauli_Super_Thermal_Power_Station	L100000102652	G100000109416	INE733E01010	1	3600		41	2023	2063	2103
coal	India	Asia	Southern Asia	Singrauli Super Thermal Power Station	Unit 5			200	operating	1984		subcritical	bituminous					NTPC [100%]	NTPC [100.0%]	24.1042	82.7064	exact	Shaktinagar	Dudhi	Sonbhadra	Uttar Pradesh	https://www.gem.wiki/Singrauli_Super_Thermal_Power_Station	L100000102652	G100000109417	INE733E01010	1	3600		40	2024	2064	2104
coal	India	Asia	Southern Asia	Singrauli Super Thermal Power Station	Unit 6			500	operating	1986		subcritical	bituminous					NTPC [100%]	NTPC [100.0%]	24.1042	82.7064	exact	Shaktinagar	Dudhi	Sonbhadra	Uttar Pradesh	https://www.gem.wiki/Singrauli_Super_Thermal_Power_Station	L100000102652	G100000109418	INE733E01010	1	3600		38	2026	2066	2106
coal	India	Asia	Southern Asia	Singrauli Super Thermal Power Station	Unit 7			500	operating	1987		subcritical	bituminous					NTPC [100%]	NTPC [100.0%]	24.1042	82.7064	exact	Shaktinagar	Dudhi	Sonbhadra	Uttar Pradesh	https://www.gem.wiki/Singrauli_Super_Thermal_Power_Station	L100000102652	G100000109419	INE733E01010	1	3600		37	2027	2067	2107
coal	India	Asia	Southern Asia	Singrauli Super Thermal Power Station	Unit 8			800	permitted			supercritical	unknown					NTPC [100%]	NTPC [100.0%]	24.1042	82.7064	exact			Sonebhadra	Uttar Pradesh	https://www.gem.wiki/Singrauli_Super_Thermal_Power_Station	L100000102652	G100000109420	INE733E01010	1	3600		-99	40	80	120
coal	India	Asia	Southern Asia	Singrauli Super Thermal Power Station	Unit 9			800	permitted			supercritical	unknown					NTPC [100%]	NTPC [100.0%]	24.1042	82.7064	exact			Sonebhadra	Uttar Pradesh	https://www.gem.wiki/Singrauli_Super_Thermal_Power_Station	L100000102652	G100000112789	INE733E01010	1	3600	3600	-99	40	80	120
coal	India	Asia	Southern Asia	Sipat power station	Unit 4		Rajiv Gandhi STPS power station	500	operating	2007		subcritical	unknown					NTPC [100%]	NTPC [100.0%]	22.1317	82.2904	exact	Sipat		Bilaspur	Chhattisgarh	https://www.gem.wiki/Sipat_power_station	L100000102185	G100000109453	INE733E01010	1	3780		17	2047	2087	2127
coal	India	Asia	Southern Asia	Sipat power station	Unit 5		Rajiv Gandhi STPS power station	500	operating	2008		subcritical	unknown					NTPC [100%]	NTPC [100.0%]	22.1317	82.2904	exact	Sipat		Bilaspur	Chhattisgarh	https://www.gem.wiki/Sipat_power_station	L100000102185	G100000109454	INE733E01010	1	3780		16	2048	2088	2128
coal	India	Asia	Southern Asia	Sipat power station	Unit 1		Rajiv Gandhi STPS power station	660	operating	2011		supercritical	unknown					NTPC [100%]	NTPC [100.0%]	22.1317	82.2904	exact	Sipat		Bilaspur	Chhattisgarh	https://www.gem.wiki/Sipat_power_station	L100000102185	G100000109450	INE733E01010	1	3780		13	2051	2091	2131
coal	India	Asia	Southern Asia	Sipat power station	Unit 2		Rajiv Gandhi STPS power station	660	operating	2011		supercritical	unknown					NTPC [100%]	NTPC [100.0%]	22.1317	82.2904	exact	Sipat		Bilaspur	Chhattisgarh	https://www.gem.wiki/Sipat_power_station	L100000102185	G100000109451	INE733E01010	1	3780		13	2051	2091	2131
coal	India	Asia	Southern Asia	Sipat power station	Unit 3		Rajiv Gandhi STPS power station	660	operating	2012		supercritical	unknown					NTPC [100%]	NTPC [100.0%]	22.1317	82.2904	exact	Sipat		Bilaspur	Chhattisgarh	https://www.gem.wiki/Sipat_power_station	L100000102185	G100000109452	INE733E01010	1	3780		12	2052	2092	2132
coal	India	Asia	Southern Asia	Sipat power station	Unit 6		Rajiv Gandhi STPS power station	800	pre-permit	2029		ultra-supercritical	unknown					NTPC [100%]	NTPC [100.0%]	22.1317	82.2904	exact	Sipat		Bilaspur	Chhattisgarh	https://www.gem.wiki/Sipat_power_station	L100000102185	G100000114226	INE733E01010	1	3780	3780	-5	2069	2109	2149
coal	India	Asia	Southern Asia	Solapur power station	Unit 1			660	operating	2017		supercritical	unknown					NTPC [100%]	NTPC [100.0%]	17.5513	75.9832	exact	Fatatewadi & Ahirwadi	South Solarpur	Solarpur	Maharashtra	https://www.gem.wiki/Solapur_power_station	L100000102431	G100000109490	INE733E01010	1	1320		7	2057	2097	2137
coal	India	Asia	Southern Asia	Solapur power station	Unit 2			660	operating	2019		supercritical	unknown					NTPC [100%]	NTPC [100.0%]	17.5513	75.9832	exact	Fatatewadi & Ahirwadi	South Solarpur	Solarpur	Maharashtra	https://www.gem.wiki/Solapur_power_station	L100000102431	G100000109491	INE733E01010	1	1320	1320	5	2059	2099	2139
coal	India	Asia	Southern Asia	Talcher Kaniha Super Thermal Power Station	Stage I Unit 1		Talcher STPS	500	operating	1995		subcritical	bituminous					NTPC [100%]	NTPC [100.0%]	21.0971	85.075	exact	Kaniha	Talcher	Angul	Odisha	https://www.gem.wiki/Talcher_Kaniha_Super_Thermal_Power_Station	L100000102502	G100000109879	INE733E01010	1	4600		29	2035	2075	2115
coal	India	Asia	Southern Asia	Talcher Kaniha Super Thermal Power Station	Stage I Unit 2		Talcher STPS	500	operating	1996		subcritical	bituminous					NTPC [100%]	NTPC [100.0%]	21.0971	85.075	exact	Kaniha	Talcher	Angul	Odisha	https://www.gem.wiki/Talcher_Kaniha_Super_Thermal_Power_Station	L100000102502	G100000109880	INE733E01010	1	4600		28	2036	2076	2116
coal	India	Asia	Southern Asia	Talcher Kaniha Super Thermal Power Station	Stage II Unit 3		Talcher STPS	500	operating	2003		subcritical	bituminous					NTPC [100%]	NTPC [100.0%]	21.0971	85.075	exact	Kaniha	Talcher	Angul	Odisha	https://www.gem.wiki/Talcher_Kaniha_Super_Thermal_Power_Station	L100000102502	G100000109881	INE733E01010	1	4600		21	2043	2083	2123
coal	India	Asia	Southern Asia	Talcher Kaniha Super Thermal Power Station	Stage II Unit 4		Talcher STPS	500	operating	2003		subcritical	bituminous					NTPC [100%]	NTPC [100.0%]	21.0971	85.075	exact	Kaniha	Talcher	Angul	Odisha	https://www.gem.wiki/Talcher_Kaniha_Super_Thermal_Power_Station	L100000102502	G100000109882	INE733E01010	1	4600		21	2043	2083	2123
coal	India	Asia	Southern Asia	Talcher Kaniha Super Thermal Power Station	Stage II Unit 5		Talcher STPS	500	operating	2005		subcritical	bituminous					NTPC [100%]	NTPC [100.0%]	21.0971	85.075	exact	Kaniha	Talcher	Angul	Odisha	https://www.gem.wiki/Talcher_Kaniha_Super_Thermal_Power_Station	L100000102502	G100000109883	INE733E01010	1	4600		19	2045	2085	2125
coal	India	Asia	Southern Asia	Talcher Kaniha Super Thermal Power Station	Stage II Unit 6		Talcher STPS	500	operating	2006		subcritical	bituminous					NTPC [100%]	NTPC [100.0%]	21.0971	85.075	exact	Kaniha	Talcher	Angul	Odisha	https://www.gem.wiki/Talcher_Kaniha_Super_Thermal_Power_Station	L100000102502	G100000109884	INE733E01010	1	4600		18	2046	2086	2126
coal	India	Asia	Southern Asia	Talcher Kaniha Super Thermal Power Station	Stage III Unit 1		Talcher STPS	800	cancelled			unknown	unknown					NTPC [100%]	NTPC [100.0%]	21.0981	85.074	exact	Kaniha		Angul	Odisha	https://www.gem.wiki/Talcher_Kaniha_Super_Thermal_Power_Station	L100000102502	G100000109877	INE733E01010	1	4600		-99	40	80	120
coal	India	Asia	Southern Asia	Talcher Kaniha Super Thermal Power Station	Stage III Unit 2		Talcher STPS	800	cancelled			unknown	unknown					NTPC [100%]	NTPC [100.0%]	21.0981	85.074	exact	Kaniha		Angul	Odisha	https://www.gem.wiki/Talcher_Kaniha_Super_Thermal_Power_Station	L100000102502	G100000109878	INE733E01010	1	4600	4600	-99	40	80	120
coal	India	Asia	Southern Asia	Talcher power station	Unit A1		Talcher-A power station Unit 1 (Unit A1), Talcher-A power station Unit 2 (Unit A2), Talcher-A power station Unit 3 (Unit A3), Talcher-A power station Unit 4 (Unit A4), Talcher-B power station Unit 1 (Unit B5), Talcher-B power station Unit 2 (Unit B6)	60	retired	1967	2021	subcritical	bituminous					NTPC [100%]	NTPC [100.0%]	20.9111	85.2072	exact	Digi	Talcher	Angul	Odisha	https://www.gem.wiki/Talcher_power_station	L100000102504	G100000109889	INE733E01010	1	1780		57	2007	2047	2087
coal	India	Asia	Southern Asia	Talcher power station	Unit A2		Talcher-A power station Unit 1 (Unit A1), Talcher-A power station Unit 2 (Unit A2), Talcher-A power station Unit 3 (Unit A3), Talcher-A power station Unit 4 (Unit A4), Talcher-B power station Unit 1 (Unit B5), Talcher-B power station Unit 2 (Unit B6)	60	retired	1968	2021	subcritical	bituminous					NTPC [100%]	NTPC [100.0%]	20.9111	85.2072	exact	Digi	Talcher	Angul	Odisha	https://www.gem.wiki/Talcher_power_station	L100000102504	G100000109890	INE733E01010	1	1780		56	2008	2048	2088
coal	India	Asia	Southern Asia	Talcher power station	Unit A3		Talcher-A power station Unit 1 (Unit A1), Talcher-A power station Unit 2 (Unit A2), Talcher-A power station Unit 3 (Unit A3), Talcher-A power station Unit 4 (Unit A4), Talcher-B power station Unit 1 (Unit B5), Talcher-B power station Unit 2 (Unit B6)	60	retired	1968	2021	subcritical	bituminous					NTPC [100%]	NTPC [100.0%]	20.9111	85.2072	exact	Digi	Talcher	Angul	Odisha	https://www.gem.wiki/Talcher_power_station	L100000102504	G100000109891	INE733E01010	1	1780		56	2008	2048	2088
coal	India	Asia	Southern Asia	Talcher power station	Unit A4		Talcher-A power station Unit 1 (Unit A1), Talcher-A power station Unit 2 (Unit A2), Talcher-A power station Unit 3 (Unit A3), Talcher-A power station Unit 4 (Unit A4), Talcher-B power station Unit 1 (Unit B5), Talcher-B power station Unit 2 (Unit B6)	60	retired	1969	2021	subcritical	bituminous					NTPC [100%]	NTPC [100.0%]	20.9111	85.2072	exact	Digi	Talcher	Angul	Odisha	https://www.gem.wiki/Talcher_power_station	L100000102504	G100000109892	INE733E01010	1	1780		55	2009	2049	2089
coal	India	Asia	Southern Asia	Talcher power station	Unit B5		Talcher-A power station Unit 1 (Unit A1), Talcher-A power station Unit 2 (Unit A2), Talcher-A power station Unit 3 (Unit A3), Talcher-A power station Unit 4 (Unit A4), Talcher-B power station Unit 1 (Unit B5), Talcher-B power station Unit 2 (Unit B6)	110	retired	1982	2021	subcritical	bituminous					NTPC [100%]	NTPC [100.0%]	20.9111	85.2072	exact	Digi	Talcher	Angul	Odisha	https://www.gem.wiki/Talcher_power_station	L100000102504	G100000109893	INE733E01010	1	1780		42	2022	2062	2102
coal	India	Asia	Southern Asia	Talcher power station	Unit B6		Talcher-A power station Unit 1 (Unit A1), Talcher-A power station Unit 2 (Unit A2), Talcher-A power station Unit 3 (Unit A3), Talcher-A power station Unit 4 (Unit A4), Talcher-B power station Unit 1 (Unit B5), Talcher-B power station Unit 2 (Unit B6)	110	retired	1983	2021	subcritical	bituminous					NTPC [100%]	NTPC [100.0%]	20.9111	85.2072	exact	Digi	Talcher	Angul	Odisha	https://www.gem.wiki/Talcher_power_station	L100000102504	G100000109894	INE733E01010	1	1780		41	2023	2063	2103
coal	India	Asia	Southern Asia	Talcher power station	Stage III Unit 1		Talcher-A power station Unit 1 (Unit A1), Talcher-A power station Unit 2 (Unit A2), Talcher-A power station Unit 3 (Unit A3), Talcher-A power station Unit 4 (Unit A4), Talcher-B power station Unit 1 (Unit B5), Talcher-B power station Unit 2 (Unit B6)	660	construction	2026		ultra-supercritical	bituminous					NTPC [100%]	NTPC [100.0%]	20.9111	85.2072	exact	Kaniha		Angul	Odisha	https://www.gem.wiki/Talcher_power_station	L100000102504	G100000109887	INE733E01010	1	1780		-2	2066	2106	2146
coal	India	Asia	Southern Asia	Talcher power station	Stage III Unit 2		Talcher-A power station Unit 1 (Unit A1), Talcher-A power station Unit 2 (Unit A2), Talcher-A power station Unit 3 (Unit A3), Talcher-A power station Unit 4 (Unit A4), Talcher-B power station Unit 1 (Unit B5), Talcher-B power station Unit 2 (Unit B6)	660	construction	2027		ultra-supercritical	bituminous					NTPC [100%]	NTPC [100.0%]	20.9111	85.2072	exact	Kaniha		Angul	Odisha	https://www.gem.wiki/Talcher_power_station	L100000102504	G100000109888	INE733E01010	1	1780	1780	-3	2067	2107	2147
coal	India	Asia	Southern Asia	Tanda power station	Unit 1			110	operating	1988		subcritical	bituminous					NTPC [100%]	NTPC [100.0%]	26.5895	82.6012	exact	Bahadurgarh	Tanda	Ambedkarnagar	Uttar Pradesh	https://www.gem.wiki/Tanda_power_station	L100000102653	G100000109926	INE733E01010	1	1760		36	2028	2068	2108
coal	India	Asia	Southern Asia	Tanda power station	Unit 2			110	operating	1989		subcritical	bituminous					NTPC [100%]	NTPC [100.0%]	26.5895	82.6012	exact	Bahadurgarh	Tanda	Ambedkarnagar	Uttar Pradesh	https://www.gem.wiki/Tanda_power_station	L100000102653	G100000109927	INE733E01010	1	1760		35	2029	2069	2109
coal	India	Asia	Southern Asia	Tanda power station	Unit 3			110	operating	1990		subcritical	bituminous					NTPC [100%]	NTPC [100.0%]	26.5895	82.6012	exact	Bahadurgarh	Tanda	Ambedkarnagar	Uttar Pradesh	https://www.gem.wiki/Tanda_power_station	L100000102653	G100000109928	INE733E01010	1	1760		34	2030	2070	2110
coal	India	Asia	Southern Asia	Tanda power station	Unit 4			110	operating	1998		subcritical	bituminous					NTPC [100%]	NTPC [100.0%]	26.5895	82.6012	exact	Bahadurgarh	Tanda	Ambedkarnagar	Uttar Pradesh	https://www.gem.wiki/Tanda_power_station	L100000102653	G100000109929	INE733E01010	1	1760		26	2038	2078	2118
coal	India	Asia	Southern Asia	Tanda power station	Unit 5			660	operating	2019		supercritical	unknown					NTPC [100%]	NTPC [100.0%]	26.5892	82.6004	exact	Bahadurgarh	Tanda	Ambedkarnagar	Uttar Pradesh	https://www.gem.wiki/Tanda_power_station	L100000102653	G100000109924	INE733E01010	1	1760		5	2059	2099	2139
coal	India	Asia	Southern Asia	Tanda power station	Unit 6			660	operating	2021		supercritical	unknown					NTPC [100%]	NTPC [100.0%]	26.5892	82.6004	exact	Bahadurgarh	Tanda	Ambedkarnagar	Uttar Pradesh	https://www.gem.wiki/Tanda_power_station	L100000102653	G100000109925	INE733E01010	1	1760	1760	3	2061	2101	2141
coal	India	Asia	Southern Asia	Vallur Thermal Power Plant	Unit 1			500	operating	2012		subcritical	unknown					NTPC Tamil Nadu Energy [100%]	NTPC Ltd [50.0%]; TNEB Ltd	13.2371	80.3018	exact	Vallur	Ponneri	Thiruvallur	Tamil Nadu	https://www.gem.wiki/Vallur_Thermal_Power_Plant	L100000102590	G100000110544	INE733E01010	0.5	1500		12	2052	2092	2132
coal	India	Asia	Southern Asia	Vallur Thermal Power Plant	Unit 2			500	operating	2013		subcritical	unknown					NTPC Tamil Nadu Energy [100%]	NTPC Ltd [50.0%]; TNEB Ltd	13.2371	80.3018	exact	Vallur	Ponneri	Thiruvallur	Tamil Nadu	https://www.gem.wiki/Vallur_Thermal_Power_Plant	L100000102590	G100000110545	INE733E01010	0.5	1500		11	2053	2093	2133
coal	India	Asia	Southern Asia	Vallur Thermal Power Plant	Unit 3			500	operating	2014		subcritical	unknown					NTPC Tamil Nadu Energy [100%]	NTPC Ltd [50.0%]; TNEB Ltd	13.2371	80.3018	exact	Vallur	Ponneri	Thiruvallur	Tamil Nadu	https://www.gem.wiki/Vallur_Thermal_Power_Plant	L100000102590	G100000110546	INE733E01010	0.5	1500	1500	10	2054	2094	2134
coal	India	Asia	Southern Asia	Vindhyachal power station	Phase 1 Unit 1			210	operating	1987		subcritical	bituminous					NTPC [100%]	NTPC [100.0%]	24.0983	82.6719	exact	Waidhan	Singrauli	Singrauli	Madhya Pradesh	https://www.gem.wiki/Vindhyachal_power_station	L100000102371	G100000110598	INE733E01010	1	4760		37	2027	2067	2107
coal	India	Asia	Southern Asia	Vindhyachal power station	Phase 1 Unit 2			210	operating	1988		subcritical	bituminous					NTPC [100%]	NTPC [100.0%]	24.0983	82.6719	exact	Waidhan	Singrauli	Singrauli	Madhya Pradesh	https://www.gem.wiki/Vindhyachal_power_station	L100000102371	G100000110599	INE733E01010	1	4760		36	2028	2068	2108
coal	India	Asia	Southern Asia	Vindhyachal power station	Phase 1 Unit 3			210	operating	1989		subcritical	bituminous					NTPC [100%]	NTPC [100.0%]	24.0983	82.6719	exact	Waidhan	Singrauli	Singrauli	Madhya Pradesh	https://www.gem.wiki/Vindhyachal_power_station	L100000102371	G100000110600	INE733E01010	1	4760		35	2029	2069	2109
coal	India	Asia	Southern Asia	Vindhyachal power station	Phase 1 Unit 4			210	operating	1989		subcritical	bituminous					NTPC [100%]	NTPC [100.0%]	24.0983	82.6719	exact	Waidhan	Singrauli	Singrauli	Madhya Pradesh	https://www.gem.wiki/Vindhyachal_power_station	L100000102371	G100000110601	INE733E01010	1	4760		35	2029	2069	2109
coal	India	Asia	Southern Asia	Vindhyachal power station	Phase 1 Unit 5			210	operating	1990		subcritical	bituminous					NTPC [100%]	NTPC [100.0%]	24.0983	82.6719	exact	Waidhan	Singrauli	Singrauli	Madhya Pradesh	https://www.gem.wiki/Vindhyachal_power_station	L100000102371	G100000110602	INE733E01010	1	4760		34	2030	2070	2110
coal	India	Asia	Southern Asia	Vindhyachal power station	Phase 1 Unit 6			210	operating	1991		subcritical	bituminous					NTPC [100%]	NTPC [100.0%]	24.0983	82.6719	exact	Waidhan	Singrauli	Singrauli	Madhya Pradesh	https://www.gem.wiki/Vindhyachal_power_station	L100000102371	G100000110603	INE733E01010	1	4760		33	2031	2071	2111
coal	India	Asia	Southern Asia	Vindhyachal power station	Phase 2 Unit 1			500	operating	1999		subcritical	bituminous					NTPC [100%]	NTPC [100.0%]	24.0983	82.6719	exact	Waidhan	Singrauli	Singrauli	Madhya Pradesh	https://www.gem.wiki/Vindhyachal_power_station	L100000102371	G100000110604	INE733E01010	1	4760		25	2039	2079	2119
coal	India	Asia	Southern Asia	Vindhyachal power station	Phase 2 Unit 2			500	operating	2000		subcritical	bituminous					NTPC [100%]	NTPC [100.0%]	24.0983	82.6719	exact	Waidhan	Singrauli	Singrauli	Madhya Pradesh	https://www.gem.wiki/Vindhyachal_power_station	L100000102371	G100000110605	INE733E01010	1	4760		24	2040	2080	2120
coal	India	Asia	Southern Asia	Vindhyachal power station	Phase 3 Unit 1			500	operating	2006		subcritical	bituminous					NTPC [100%]	NTPC [100.0%]	24.0983	82.6719	exact	Waidhan	Singrauli	Singrauli	Madhya Pradesh	https://www.gem.wiki/Vindhyachal_power_station	L100000102371	G100000110606	INE733E01010	1	4760		18	2046	2086	2126
coal	India	Asia	Southern Asia	Vindhyachal power station	Phase 3 Unit 2			500	operating	2007		subcritical	bituminous					NTPC [100%]	NTPC [100.0%]	24.0983	82.6719	exact	Waidhan	Singrauli	Singrauli	Madhya Pradesh	https://www.gem.wiki/Vindhyachal_power_station	L100000102371	G100000110607	INE733E01010	1	4760		17	2047	2087	2127
coal	India	Asia	Southern Asia	Vindhyachal power station	Phase IV unit 11			500	operating	2012		subcritical	bituminous					NTPC [100%]	NTPC [100.0%]	24.0983	82.6719	exact	Waidhan	Waidhan	Singrauli	Madhya Pradesh	https://www.gem.wiki/Vindhyachal_power_station	L100000102371	G100000110608	INE733E01010	1	4760		12	2052	2092	2132
coal	India	Asia	Southern Asia	Vindhyachal power station	Phase IV units 12			500	operating	2013		subcritical	bituminous					NTPC [100%]	NTPC [100.0%]	24.0983	82.6719	exact	Waidhan	Waidhan	Singrauli	Madhya Pradesh	https://www.gem.wiki/Vindhyachal_power_station	L100000102371	G100000110609	INE733E01010	1	4760		11	2053	2093	2133
coal	India	Asia	Southern Asia	Vindhyachal power station	Phase V Unit 13			500	operating	2015		subcritical	bituminous					NTPC [100%]	NTPC [100.0%]	24.0983	82.6719	exact	Waidhan	Waidhan	Singrauli	Madhya Pradesh	https://www.gem.wiki/Vindhyachal_power_station	L100000102371	G100000110610	INE733E01010	1	4760	4760	9	2055	2095	2135
coal	India	Asia	Southern Asia	West Khasi Hills power station	Unit 1			120	cancelled			subcritical	unknown					North Eastern Electric Power [100%]	NTPC Ltd [100.0%]	25.4916	91.2698	approximate			West Khasi Hills	Meghalaya	https://www.gem.wiki/West_Khasi_Hills_power_station	L100000102440	G100000110903	INE733E01010	1	240		-99	40	80	120
coal	India	Asia	Southern Asia	West Khasi Hills power station	Unit 2			120	cancelled			subcritical	unknown					North Eastern Electric Power [100%]	NTPC Ltd [100.0%]	25.4916	91.2698	approximate			West Khasi Hills	Meghalaya	https://www.gem.wiki/West_Khasi_Hills_power_station	L100000102440	G100000110904	INE733E01010	1	240	240	-99	40	80	120
hydropower	India	Asia	Southern Asia	Koldam hydroelectric plant				800	operating	2015		conventional storage				TRUE	FALSE	NTPC LTD		31.3822	76.8765	exact		Sundarnagar	Mandi	Himachal Pradesh	https://gem.wiki/Koldam_hydroelectric_plant	L601917	G601937	INE733E01010	1	800	800	9	2055	2095	2135
hydropower	India	Asia	Southern Asia	Lata Tapovan hydroelectric plant				171	mothballed			run-of-river				TRUE	FALSE	NTPC LTD		30.0798	78.3046	approximate			Chamoli district	Uttarakhand	https://gem.wiki/Lata_Tapovan_hydroelectric_plant	L601940	G604545	INE733E01010	1	171	171	-99	40	80	120
hydropower	India	Asia	Southern Asia	Miyar hydroelectric plant				120	shelved			run-of-river				TRUE	FALSE	NTPC LTD		31.8168	77.3493	approximate			Lahaul and Spiti district	Himachal Pradesh	https://gem.wiki/Miyar_hydroelectric_plant	L601966	G601986	INE733E01010	1	120		-99	40	80	120
hydropower	India	Asia	Southern Asia	Rammam-III hydroelectric plant				120	construction			run-of-river				TRUE	FALSE	NTPC LTD		27.1236	88.2222	exact	Darjeeling	Darjeeling Pulbazar	Darjeeling district	West Bengal	https://gem.wiki/Rammam-III_hydroelectric_plant	L602007	G602027	INE733E01010	1	120	120	-99	40	80	120
hydropower	India	Asia	Southern Asia	Seli hydroelectric plant				400	shelved			run-of-river				TRUE	FALSE	NTPC LTD		31.8168	77.3493	approximate			Lahaul and Spiti district	Himachal Pradesh	https://gem.wiki/Seli_hydroelectric_plant	L602029	G602049	INE733E01010	1	400	400	-99	40	80	120
hydropower	India	Asia	Southern Asia	Tapovan Vishnugad hydroelectric plant				520	construction	2024		run-of-river				TRUE	FALSE	NTPC LTD		30.5355	79.5195	exact		Joshimath Tehsil	Chamoli district	Uttarakhand	https://gem.wiki/Tapovan_Vishnugad_hydroelectric_plant	L602054	G602075	INE733E01010	1	520	520	0	2064	2104	2144
oil/gas	India	Asia	Southern Asia	Anta power plant	1-4		Anta Thermal power station	419.33	operating	1989		CC	NG					NTPC Ltd [100.0%]	NTPC Ltd [100.0%]	25.1797	76.3188	exact	Anta			Rajasthan	https://www.gem.wiki/Anta_power_plant	L100000401464	G100000401434	INE733E01010	1	419.33	419.33	35	2029	2069	2109
oil/gas	India	Asia	Southern Asia	Auraiya Combined Cycle power plant	1-6			663	operating	1990		CC	NG					NTPC Ltd [100.0%]	NTPC Ltd [100.0%]	26.6282	79.5286	exact	Auraiya			Uttar Pradesh	https://www.gem.wiki/Auraiya_Combined_Cycle_power_plant	L100000401466	G100000401436	INE733E01010	1	663	663	34	2030	2070	2110
oil/gas	India	Asia	Southern Asia	Dadri Combined Cycle power plant	1-6			829.78	operating	1994		CC	NG/D					NTPC Ltd [100.0%]	NTPC Ltd [100.0%]	28.5932	77.6101	exact	Gautam Budh Nagar			Uttar Pradesh	https://www.gem.wiki/Dadri_Combined_Cycle_power_plant	L100000401465	G100000401435	INE733E01010	1	829.78	829.78	30	2034	2074	2114
oil/gas	India	Asia	Southern Asia	Faridabad Combined Cycle power plant	1-3			431.59	operating	2000		CC	NG/N/D					NTPC Ltd [100.0%]	NTPC Ltd [100.0%]	28.3465	77.359	exact	Faridabad District			Haryana	https://www.gem.wiki/Faridabad_Combined_Cycle_power_plant	L100000401463	G100000401433	INE733E01010	1	431.59	431.59	24	2040	2080	2120
oil/gas	India	Asia	Southern Asia	Hope Town power station	1			50	announced			not found	LNG/D					NTPC Ltd [100.0%]	NTPC Ltd [100.0%]	11.7061	92.7368	approximate	Ferrargunj Tehsil		South Andaman district	Andaman & Nicobar Is	https://www.gem.wiki/Hope_Town_power_station	L100000408394	G100000411776	INE733E01010	1	50	50	-99	40	80	120
oil/gas	India	Asia	Southern Asia	Jhanor Gandhar Combined Cycle power plant	1-4			657	operating	1995		CC	NG					NTPC Ltd [100.0%]	NTPC Ltd [100.0%]	21.8242	73.1136	exact	Bharuch			Gujarat	https://www.gem.wiki/Jhanor_Gandhar_Combined_Cycle_power_plant	L100000401489	G100000401459	INE733E01010	1	657	657	29	2035	2075	2115
oil/gas	India	Asia	Southern Asia	Kawas Combined Cycle power plant	1-6			656	operating	1993		CC	NG					NTPC Ltd [100.0%]	NTPC Ltd [100.0%]	21.175	72.6879	exact	Surat			Gujarat	https://www.gem.wiki/Kawas_Combined_Cycle_power_plant	L100000401490	G100000401460	INE733E01010	1	656	656	31	2033	2073	2113
oil/gas	India	Asia	Southern Asia	Kayamkulam Gas power plant	1		Rajiv Gandhi CCPP	350	operating	1999		CC	NG/N					NTPC Ltd [100.0%]	NTPC Ltd [100.0%]	9.2072	76.4342	approximate	Kayamkulam - Alappuzha Dist			Kerala	https://www.gem.wiki/Kayamkulam_Gas_power_plant	L100000407598	G100000409915	INE733E01010	1	350	350	25	2039	2079	2119
solar	India	Asia	Southern Asia	Amreshwar solar farm				200	pre-construction			PV						NTPC LTD		22.5415	73.4334	approximate		Amreshwar		Gujarat	https://gem.wiki/Amreshwar_solar_farm	L800586	G800698	INE733E01010	1	200	200	-99	40	80	120
solar	India	Asia	Southern Asia	Ananthapuram solar farm			Np Kunta Umspp	250	operating	2016		PV						NTPC LTD		13.1673	79.2128	approximate		Ananthapuram		Andhra Pradesh	https://gem.wiki/Ananthapuram_solar_farm	L800587	G800699	INE733E01010	1	250	250	8	2056	2096	2136
solar	India	Asia	Southern Asia	Anta solar farm			Anta Solar	90	pre-construction			PV						NTPC LTD		25.7717	71.0931	approximate		Anta	Baran	Rajasthan	https://gem.wiki/Anta_solar_farm	L800588	G800700	INE733E01010	1	90	90	-99	40	80	120
solar	India	Asia	Southern Asia	Auraiya I solar farm				20	operating	2022		PV						NTPC LTD		26.632	79.533	exact		Auraiya		Uttar Pradesh	https://gem.wiki/Auraiya_I_solar_farm	L800589	G800701	INE733E01010	1	20		2	2062	2102	2142
solar	India	Asia	Southern Asia	Auraiya II solar farm			Auraiya floating solar farm	20	operating	2022		PV						NTPC LTD		26.634	79.5279	exact		Auraiya		Uttar Pradesh	https://gem.wiki/Auraiya_II_solar_farm	L800590	G800702	INE733E01010	1	20	20	2	2062	2102	2142
solar	India	Asia	Southern Asia	Bhadla (NTPC) solar farm				625	pre-construction			PV						NTPC LTD		27.5182	71.9306	approximate		Bhadla	Jodhpur	Rajasthan	https://gem.wiki/Bhadla_(NTPC)_solar_farm	L829495	G833285	INE733E01010	1	625	625	-99	40	80	120
solar	India	Asia	Southern Asia	Bhadla (NTPC) Solar Park				260	operating	2017		PV						NTPC LTD		27.488	71.981	exact	Bhadla		Jodhpur	Rajasthan	https://gem.wiki/Bhadla_(NTPC)_Solar_Park	L800591	G800703	INE733E01010	1	260	260	7	2057	2097	2137
solar	India	Asia	Southern Asia	Bhensada solar farm			JFPc} NTPC Tata	320	pre-construction			PV						NTPC LTD		25.1862	75.8589	approximate		Bhensada		Rajasthan	https://gem.wiki/Bhensada_solar_farm	L800592	G800704	INE733E01010	1	320	320	-99	40	80	120
solar	India	Asia	Southern Asia	Bilhaur solar farm				225	operating	2021		PV						NTPC LTD		26.756	80.072	exact		Bilhaur		Uttar Pradesh	https://gem.wiki/Bilhaur_solar_farm	L800593	G800705	INE733E01010	1	225	225	3	2061	2101	2141
solar	India	Asia	Southern Asia	Chhattargarh solar farm				150	pre-construction			PV						NTPC LTD		25.1862	75.8589	approximate		Chhattargarh		Rajasthan	https://gem.wiki/Chhattargarh_solar_farm	L800594	G800706	INE733E01010	1	150	150	-99	40	80	120
solar	Cuba	Americas	Latin America and the Caribbean	Cumbre (NTPC) solar farm		Parque Solar Cumbre (NTPC)		25	pre-construction			PV						Union Electrica de Cuba [50%]; NTPC Renewable Energy LTD [50%]		22.3115	-79.6668	approximate				Villa Clara	https://gem.wiki/Cumbre_(NTPC)_solar_farm	L832414	G837966	INE733E01010	0.5	25	25	-99	40	80	120
solar	India	Asia	Southern Asia	Devikot solar farm			JFPc} NTPC Hild	240	operating	2022		PV						NTPC LTD		26.6849	71.2351	approximate		Devikot		Rajasthan	https://gem.wiki/Devikot_solar_farm	L800595	G800707	INE733E01010	1	240	240	2	2062	2102	2142
solar	India	Asia	Southern Asia	Ettayapuram solar farm				230	operating	2022		PV						NTPC LTD		9.1806	78.0231	approximate		Ettayapuram		Tamil Nadu	https://gem.wiki/Ettayapuram_solar_farm	L800758	G800881	INE733E01010	1	230	230	2	2062	2102	2142
solar	India	Asia	Southern Asia	Fatehgarh solar farm	1			50	operating	2022		PV						NTPC LTD		25.5377	75.3612	approximate		Fatehgarh	Jaisalmer	Rajasthan	https://gem.wiki/Fatehgarh_solar_farm	L808861	G811154	INE733E01010	1	296		2	2062	2102	2142
solar	India	Asia	Southern Asia	Fatehgarh solar farm	2			246	operating	2022		PV						NTPC LTD		25.5377	75.3612	approximate		Fatehgarh	Jaisalmer	Rajasthan	https://gem.wiki/Fatehgarh_solar_farm	L808861	G811155	INE733E01010	1	296	296	2	2062	2102	2142
solar	India	Asia	Southern Asia	Gujarat GUVNL XI (NTPC) solar farm				200	pre-construction			PV						NTPC LTD		22.3376	71.7211	approximate				Gujarat	https://gem.wiki/Gujarat_GUVNL_XI_(NTPC)_solar_farm	L808867	G811161	INE733E01010	1	200	200	-99	40	80	120
solar	India	Asia	Southern Asia	Jetsar solar farm			Jetsar Solar	160	operating	2022		PV						NTPC LTD		9.0128	76.9144	approximate		Jetsar		Rajasthan	https://gem.wiki/Jetsar_solar_farm	L800598	G800710	INE733E01010	1	160	160	2	2062	2102	2142
solar	India	Asia	Southern Asia	Jhanor Gandhar solar farm			Gandhar Solar PV farm	20	operating	2022		PV						NTPC LTD		21.8243	73.1137	approximate		Jhanor Gandhar		Gujarat	https://gem.wiki/Jhanor_Gandhar_solar_farm	L800599	G800711	INE733E01010	1	20	20	2	2062	2102	2142
solar	India	Asia	Southern Asia	Kawas solar farm			Kawas Solar	56	operating			PV						NTPC LTD		21.175	72.684	exact		Kawas		Gujarat	https://gem.wiki/Kawas_solar_farm	L800600	G800712	INE733E01010	1	56	56	-99	40	80	120
solar	India	Asia	Southern Asia	Kayamkulam solar farm			Kayamkulam Floating	102	operating	2022		PV						NTPC LTD		9.1697	76.501	approximate		Kayamkulam		Kerala	https://gem.wiki/Kayamkulam_solar_farm	L800601	G800713	INE733E01010	1	102	102	2	2062	2102	2142
solar	India	Asia	Southern Asia	Kutch (NTPC) Solar Park				4750	pre-construction			Assumed PV						NTPC LTD		23.8245	69.7298	approximate	Khavada		Kutch	Gujarat	https://gem.wiki/Kutch_(NTPC)_Solar_Park	L800602	G800714	INE733E01010	1	4750	4750	-99	40	80	120
solar	Cuba	Americas	Latin America and the Caribbean	La Distancia (NTPC) solar farm		Parque Soalr La Distancia (NTPC)		10	pre-construction			PV						Union Electrica de Cuba [50%]; NTPC Renewable Energy LTD [50%]		22.6407	-80.046	approximate				Villa Clara	https://gem.wiki/La_Distancia_(NTPC)_solar_farm	L832415	G837967	INE733E01010	0.5	10	10	-99	40	80	120
solar	Cuba	Americas	Latin America and the Caribbean	La Paloma (NTPC) solar farm		Parque Solar La Paloma (NTPC)		5	pre-construction			PV						Union Electrica de Cuba [50%]; NTPC Renewable Energy LTD [50%]		22.9846	-80.5867	approximate				Villa Clara	https://gem.wiki/La_Paloma_(NTPC)_solar_farm	L832416	G837968	INE733E01010	0.5	5	5	-99	40	80	120
solar	Cuba	Americas	Latin America and the Caribbean	Macún (NTPC) solar farm		Parque Solar Macún (NTPC)		10	pre-construction			PV						Union Electrica de Cuba [50%]; NTPC Renewable Energy LTD [50%]		22.7987	-80.0776	approximate	Sagua La Grande			Villa Clara	https://gem.wiki/Macún_(NTPC)_solar_farm	L832418	G837970	INE733E01010	0.5	10	10	-99	40	80	120
solar	India	Asia	Southern Asia	Mandsaur (NTPC) solar farm				250	operating	2017		PV						NTPC LTD		24.088	75.799	exact		Mandsaur		Madhya Pradesh	https://gem.wiki/Mandsaur_(NTPC)_solar_farm	L800603	G800715	INE733E01010	1	250	250	7	2057	2097	2137
solar	Cuba	Americas	Latin America and the Caribbean	Minidustria 2 (NTPC) solar farm		Parque Solar Minidustria 2 (NTPC)		5	pre-construction			PV						Union Electrica de Cuba [50%]; NTPC Renewable Energy LTD [50%]		22.435	-79.9326	approximate	Santa Clara			Villa Clara	https://gem.wiki/Minidustria_2_(NTPC)_solar_farm	L832419	G837971	INE733E01010	0.5	5	5	-99	40	80	120
solar	Niger	Africa	Sub-Saharan Africa	Niger (NTPC) solar farm				50	announced			Assumed PV						NTPC LTD		16.808	9.9986	approximate		Tchirozérine			https://gem.wiki/Niger_(NTPC)_solar_farm	L827703	G831249	INE733E01010	1	50	50	-99	40	80	120
solar	India	Asia	Southern Asia	Nokhra solar farm			Nokh Solar Park	300	operating	2022		PV						NTPC LTD		27.636	72.689	exact		Nokhra		Rajasthan	https://gem.wiki/Nokhra_solar_farm	L800604	G800716	INE733E01010	1	300	300	2	2062	2102	2142
solar	India	Asia	Southern Asia	Omkareshwar Floating Solar Park	2A			100	pre-construction			PV						NTPC LTD		23.8143	77.5341	approximate	Mandhata		Khnadwa	Madhya Pradesh	https://gem.wiki/Omkareshwar_Floating_Solar_Park	L800686	G800800	INE733E01010	1	100	100	-99	40	80	120
solar	India	Asia	Southern Asia	Panchet Dam floating solar farm	1			75	announced			PV						NTPC Renewable Energy		23.6802	86.7459	approximate		Nirsa-Cum-Chirkunda	Dhanbad District	Jharkhand	https://gem.wiki/Panchet_Dam_floating_solar_farm	L830012	G833851	INE733E01010	1	155		-99	40	80	120
solar	India	Asia	Southern Asia	Panchet Dam floating solar farm	2			80	announced			PV						NTPC Renewable Energy		23.6802	86.7459	approximate		Nirsa-Cum-Chirkunda	Dhanbad District	Jharkhand	https://gem.wiki/Panchet_Dam_floating_solar_farm	L830012	G833852	INE733E01010	1	155	155	-99	40	80	120
solar	Cuba	Americas	Latin America and the Caribbean	Program-06 ISA solar farm	future phases	Parque Solar Program-06 ISA solar farm		1090	announced	2030		PV						Union Electrica de Cuba [50%]; NTPC Renewable Energy LTD [50%]		22.1866	-79.6516	approximate				Villa Clara	https://gem.wiki/Program-06_ISA_solar_farm	L832422	G837974	INE733E01010	0.5	1090	1090	-6	2070	2110	2150
solar	Cuba	Americas	Latin America and the Caribbean	Quemado Hilario (NTPC) solar farm		Parque Solar Quemado Hilario (NTPC)		5	pre-construction			PV						Union Electrica de Cuba [50%]; NTPC Renewable Energy LTD [50%]		22.435	-79.9326	approximate	Santa Clara			Villa Clara	https://gem.wiki/Quemado_Hilario_(NTPC)_solar_farm	L832423	G837975	INE733E01010	0.5	5	5	-99	40	80	120
solar	India	Asia	Southern Asia	Raigarh solar farm				50	operating	2014		PV						NTPC LTD		22.5001	83.5001	approximate		Raigarh		Chhattisgarh	https://gem.wiki/Raigarh_solar_farm	L800605	G800717	INE733E01010	1	50	50	10	2054	2094	2134
solar	India	Asia	Southern Asia	Ramagundam (NTPC) I solar farm			Ramagundam-3 Division	38	operating	2022		PV						NTPC LTD		18.7378	79.4635	exact		Ramagundam Floating		Telangana	https://gem.wiki/Ramagundam_(NTPC)_I_solar_farm	L800607	G800719	INE733E01010	1	38	38	2	2062	2102	2142
solar	India	Asia	Southern Asia	Ramagundam (NTPC) II solar farm			Ramagundam Floating Solar	62	operating	2022		PV						NTPC LTD		18.7378	79.4635	exact		Ramagundam		Telangana	https://gem.wiki/Ramagundam_(NTPC)_II_solar_farm	L800608	G800720	INE733E01010	1	62	62	2	2062	2102	2142
solar	India	Asia	Southern Asia	Rihand solar farm				20	pre-construction			PV						NTPC LTD		24.2033	83.0053	approximate		Rihand		Uttar Pradesh	https://gem.wiki/Rihand_solar_farm	L800609	G800721	INE733E01010	1	20	20	-99	40	80	120
solar	India	Asia	Southern Asia	Sadar Ayodhya solar farm				40	pre-construction			PV						NTPC LTD		26.7962	82.2066	approximate		Sadar	Ayodhya	Uttar Pradesh	https://gem.wiki/Sadar_Ayodhya_solar_farm	L830087	G833929	INE733E01010	1	40	40	-99	40	80	120
solar	India	Asia	Southern Asia	Sambhu Ki Bhurj II solar farm				150	operating	2022		PV						NTPC LTD		22.3376	71.7211	approximate				Gujarat	https://gem.wiki/Sambhu_Ki_Bhurj_II_solar_farm	L830096	G833938	INE733E01010	1	150	150	2	2062	2102	2142
solar	India	Asia	Southern Asia	Sambhu Ki Bhurj solar farm				300	operating	2022		PV						NTPC LTD		25.1862	75.8589	approximate		Sambhu Ki Bhurj		Rajasthan	https://gem.wiki/Sambhu_Ki_Bhurj_solar_farm	L800610	G800722	INE733E01010	1	300	300	2	2062	2102	2142
solar	Sri Lanka	Asia	Southern Asia	Sampur Solar Power Project	1		Trincomalee solar farm, Trincomalee Solar	50	announced	2025		PV						NTPC LTD; India and the Ceylon Electricity Board (CEB)		8.4824	81.2983	approximate			Trincomalee district		https://gem.wiki/Sampur_Solar_Power_Project	L808766	G811044	INE733E01010	0.5	135		-1	2065	2105	2145
solar	Sri Lanka	Asia	Southern Asia	Sampur Solar Power Project	2		Trincomalee solar farm, Trincomalee Solar	85	announced			PV						NTPC LTD; India and the Ceylon Electricity Board (CEB)		8.4824	81.2983	approximate			Trincomalee district		https://gem.wiki/Sampur_Solar_Power_Project	L808766	G834928	INE733E01010	0.5	135	135	-99	40	80	120
solar	India	Asia	Southern Asia	Shajapur solar park	1		Shajapur Solar	105	pre-construction	2023		PV						NTPC LTD		23.418	76.2705	approximate			Shajapur	Madhya Pradesh	https://gem.wiki/Shajapur_solar_park	L808946	G811249	INE733E01010	1	325		1	2063	2103	2143
solar	India	Asia	Southern Asia	Shajapur solar park	2		Shajapur Solar	220	pre-construction	2023		PV						NTPC LTD		23.418	76.2705	approximate			Shajapur	Madhya Pradesh	https://gem.wiki/Shajapur_solar_park	L808946	G811250	INE733E01010	1	325	325	1	2063	2103	2143
solar	India	Asia	Southern Asia	Simhadri Floating solar farm			Simhadri	25	operating	2021		PV						NTPC LTD		14.8221	78.2817	approximate		Simhadri Floating		Andhra Pradesh	https://gem.wiki/Simhadri_Floating_solar_farm	L800611	G800723	INE733E01010	1	25	25	3	2061	2101	2141
solar	India	Asia	Southern Asia	Solapur solar farm				23	operating	2023		Assumed PV						NTPC LTD		17.6578	75.9141	approximate		Solapur		Maharashtra	https://gem.wiki/Solapur_solar_farm	L800612	G800724	INE733E01010	1	23	23	1	2063	2103	2143
solar	India	Asia	Southern Asia	Tilaiya Dam floating solar farm				155	announced			PV						NTPC Renewable Energy		24.3228	85.5202	approximate		Chandwara	Kodarma District	Jharkhand	https://gem.wiki/Tilaiya_Dam_floating_solar_farm	L830197	G834046	INE733E01010	1	155	155	-99	40	80	120
wind	India	Asia	Southern Asia	Dayapar (NTPC) II wind farm				200	pre-construction			onshore						NTPC Renewable Energy LTD		23.6348	68.9012	approximate		Dayapar	Kutch	Gujarat	https://gem.wiki/Dayapar_(NTPC)_II_wind_farm	L917046	G921148	INE733E01010	1	200	200	-99	40	80	120
wind	India	Asia	Southern Asia	Dayapar (NTPC) III wind farm				150	pre-construction			onshore						NTPC LTD		23.6348	68.9012	approximate		Dayapar	Kutch	Gujarat	https://gem.wiki/Dayapar_(NTPC)_III_wind_farm	L922381	G927920	INE733E01010	1	150		-99	40	80	120
wind	India	Asia	Southern Asia	Dayapar (NTPC) wind farm				150	pre-construction			onshore						NTPC LTD		23.6348	68.9012	approximate		Dayapar	Kutch	Gujarat	https://gem.wiki/Dayapar_(NTPC)_wind_farm	L900499	G900577	INE733E01010	1	150	150	-99	40	80	120
wind	India	Asia	Southern Asia	NTPC Hybrid SECI IV wind farm				225	pre-construction	2024		onshore						NTPC LTD		23.2064	78.382	approximate			Kutch	Gujarat	https://gem.wiki/NTPC_Hybrid_SECI_IV_wind_farm	L917097	G921199	INE733E01010	1	225		0	2064	2104	2144
wind	India	Asia	Southern Asia	NTPC Hybrid SECI V wind farm				225	pre-construction	2023		onshore						NTPC Renewable Energy LTD		23.2064	78.382	approximate			Kutch	Gujarat	https://gem.wiki/NTPC_Hybrid_SECI_V_wind_farm	L917098	G921200	INE733E01010	1	225	225	1	2063	2103	2143
wind	India	Asia	Southern Asia	Rojmal (NTPC) wind farm				50	operating			onshore						NTPC LTD		22.5415	73.4334	approximate		Rojmal		Gujarat	https://gem.wiki/Rojmal_(NTPC)_wind_farm	L900500	G900578	INE733E01010	1	50	50	-99	40	80	120

## Sheet: Factors
Fuel Type	Capacity factor 2021	Capacity factor 2022	CF2020	CF2021	CF2022	CF2023		NTPC Ltd - annual report 2021	https://ntpc.co.in/sites/default/files/annual-report/complete-reports/Annual-Report-2021-22.pdf
Coal-hard	0.613113	0.703691	0.616567	0.60966	0.676943	0.730439		NTPC Ltd - annual report 2022	https://ntpc.co.in/sites/default/files/annual-report/complete-reports/47th%20Annual%20Report%20of%20NTPC%202022-2023%20New.pdf
Lignite	0	0	0	0	0	0
Oil	0	0	0	0	0	0
Gas	0.179657	0.1208	0.161949	0.197365	0.150781	0.0908193
Fuel Type	Heat rate (Btu per kWh) 2022
Coal	10689							CDP C-EU8.2d 2021
Petroleum	11166							Energy Source Type	Nameplate capacity (MW)	Gross electricity generation (GWh)	Net electricity generation (GWh)	Absolute scope 1 emissions (metric tons CO2e)	Scope 1 emissions intensity (metric tons CO2e per GWh)		Capacity factor
Natural Gas	7740							Coal – hard	56874	337275		3.00101e+08	889.78		0.676965
Nuclear	10448							Lignite
								Oil
Fuel Type	Emission factors (kg of CO2 per TJ) US		Fuel Type	Emission factors (kg of CO2 per TJ) IPCC2006				Gas	6511	8599		3.98232e+06	463.11	63385	0.150763
Bituminous Coal	88374.7		Crude Oil	73300				Sustainable biomass
Distillate Oil	70271.4		Natural Gas Liquids	64200				Other biomass
Jet Fuel	68461		Coking Coal	94600				Waste (non-biomass)
Kerosene	69370.9		Other Bituminous Coal	94600				Nuclear
Lignite Coal	93142.3		Sub-Bituminous Coal	96100				Fossil-fuel plants fitted with CCS
Municipal Solid Waste	47286.7		Lignite	101000				Geothermal
Natural Gas	50149.2		Coke	107000				Hydropower	3757	12175		0	0		0.369934
Petroleum Coke	96791.4		Gas/Diesel Oil	74100				Wind	163	338		0	0		0.236715
Propane Gas	59598.9		Residual Fuel Oil	77400				Solar	1657	2129		0	0		0.146673
Refined Coal	88374.7		Natural Gas	56100				Marine
Residual Fuel Oil	71171.8		Natural Gas Liquids	64200				Other renewable
Subbituminous Coal	92061.8		Wood / Wood Waste	112000				Other non-renewable
Tire-Derived Fuel	81484.1		Charcoal	112000				Total	68962	360517	335758	3.04146e+08	843.63		0.596777
Waste Coal	88374.7		Industrial Wastes	143000
Waste Oil	70138.7		Waste Oils	73300
Fuel Type	Emission factors (kg of CO2 per MMBTU) US		Fuel Type	Emission factors (kg of CO2 per MMBTU) IPCC2006				CDP C-EU8.2d 2022
Bituminous Coal	93.24		Crude Oil	77.3354				Energy Source Type	Nameplate capacity (MW)	Gross electricity generation (GWh)	Net electricity generation (GWh)	Absolute scope 1 emissions (metric tons CO2e)	Scope 1 emissions intensity (metric tons CO2e per GWh)		Capacity factor
Distillate Oil	74.14		Natural Gas Liquids	67.7344				Coal – hard	58814	376334		3.33685e+08	886.67		0.730448
Jet Fuel	72.23		Coking Coal	99.808				Lignite
Kerosene	73.19		Other Bituminous Coal	99.808				Oil
Lignite Coal	98.27		Sub-Bituminous Coal	101.391				Gas	6511	5176.2		2.77616e+06	536.33	65325	0.0907526
Municipal Solid Waste	49.89		Lignite	106.56				Sustainable biomass
Natural Gas	52.91		Coke	112.891				Other biomass
Petroleum Coke	102.12		Gas/Diesel Oil	78.1794				Waste (non-biomass)
Propane Gas	62.88		Residual Fuel Oil	81.6611				Nuclear
Refined Coal	93.24		Natural Gas	59.1885				Fossil-fuel plants fitted with CCS
Residual Fuel Oil	75.09		Natural Gas Liquids	67.7344				Geothermal
Subbituminous Coal	97.13		Wood / Wood Waste	118.166				Hydropower	3757	12988.9		0	0		0.394662
Tire-Derived Fuel	85.97		Charcoal	118.166				Wind	163	324.04		0	0		0.226938
Waste Coal	93.24		Industrial Wastes	150.873				Solar	3009	4486.48		0	0		0.170208
Waste Oil	74		Waste Oils	77.3354				Marine
								Other renewable
								Other non-renewable
								Total	72254	399310	371278	3.36461e+08	842.61		0.630876
								https://ntpc.co.in/media/press-releases/ntpc-achieves-422-bu-annual-generation-fy-24
								During the financial year 2023-24, NTPC Coal stations recorded a plant load factor (PLF) of 77%.
								https://ntpc.co.in/media/press-releases/ntpc-delivers-electrifying-performance-fy-2021-22
								The coal-based plants recorded a PLF (Plant Load Factor) of 70.7% with an availability factor of 88.8% in FY 21-22.
								Financial Year 2020-21: Plant Load Factor (PLF) of 66.00% as against all India PLF of 54.56% maintaining a spread of over 11%
								During the Financial Year 2022-23, NTPC achieved the Plant Load Factor (PLF) of 75.9% for its coal power plant against the 64.21% of all India coal power plants.
									2020	2021	2022	2023
									0.66	0.707	0.759	0.77
										0.6835		0.7645
								Coal		337.3	12.9
								Gas		8.6	5.2
						68302			0.783666
								CF	0.544792
								MW	65810	65810	68962
								GWh	314070		360520
								MW
								Coal	45750	54224	48120
								gas	4017	6511	4017
								Renewables	1158	1350	1660
								Hydro	800	3725	800
								MW
								Coal	7154		8094
								gas	2494		2494
								Renewables	192		168
								Hydro	2925		2949
								TWh
								Coal	289.59
								gas	11.257
								Renewables	1.86
								Hydro	11.37
								CF
								Coal	0.624872
								gas	0.197365
								MW	2020	2021	2022	2023
								Coal	51104	54224	56875	58814
								Gas	6511	6511	6511	6511
								GWh
								Coal	276019	289590	337270	376330
								Gas	9237	11257	8600	5180
								CF
								Coal	0.616567	0.60966	0.676943	0.730439
								Gas	0.161949	0.197365	0.150781	0.0908193

## Sheet: NTPC_BAU
Type	Country/area	Region	Subregion	Plant / Project name	Unit / Phase name	Plant / Project name (local)	Plant / Project name (other)	Capacity (MW)	Status	Start year	Retired year	Technology	Fuel	Country/area 1 (hydropower only)	Country/area 2 (hydropower only)	Country/area 1 Capacity (MW) (hydropower only)	Country/area 2 Capacity (MW) (hydropower only)	Owner	Parent	Latitude	Longitude	Location accuracy	City	Local area (taluk, county)	Major area (prefecture, district)	Subnational unit (state, province)	GEM.Wiki URL	GEM location ID	GEM unit/phase ID	CompISIN	Ownership	Plant capacity	Plant capacity	Age	Reinvestment year	Reinvestment year	Reinvestment year	2020	2021	2022	2023	2024	2025	2026	2027	2028	2029	2030	2031
coal	India	Asia	Southern Asia	Anpara-E power station (MUNPL)	Unit 1			800	announced			supercritical	unknown					Meja Urja Nigam	NTPC Ltd; Uttar Pradesh Rajya Vidyut Utpadan Nigam Ltd	24.2046	82.7827	approximate	Anpara		Sonbhadra District	Uttar Pradesh	https://www.gem.wiki/Anpara-E_power_station_(MUNPL)	L100001000082	G100001000203	INE733E01010	0.5	1600		-99	40	80	120	0	0	0	0	0	0	0	0	0	800	800	800
coal	India	Asia	Southern Asia	Anpara-E power station (MUNPL)	Unit 2			800	announced			supercritical	unknown					Meja Urja Nigam	NTPC Ltd; Uttar Pradesh Rajya Vidyut Utpadan Nigam Ltd	24.2046	82.7827	approximate	Anpara		Sonbhadra District	Uttar Pradesh	https://www.gem.wiki/Anpara-E_power_station_(MUNPL)	L100001000082	G100001000204	INE733E01010	0.5	1600	1600	-99	40	80	120	0	0	0	0	0	0	0	0	0	800	800	800
coal	India	Asia	Southern Asia	Barh I power station	Unit 1		Barh STPP	660	operating	2021		supercritical	unknown					NTPC [100%]	NTPC [100.0%]	25.4693	85.7452	exact	Barh		Patna	Bihar	https://www.gem.wiki/Barh_I_power_station	L100000102092	G100000100623	INE733E01010	1	1980		3	2061	2101	2141	0	660	660	660	660	660	660	660	660	660	660	660
coal	India	Asia	Southern Asia	Barh I power station	Unit 2		Barh STPP	660	operating	2023		supercritical	unknown					NTPC [100%]	NTPC [100.0%]	25.4865	85.7452	exact	Barh		Patna	Bihar	https://www.gem.wiki/Barh_I_power_station	L100000102092	G100000100624	INE733E01010	1	1980		1	2063	2103	2143	0	0	0	660	660	660	660	660	660	660	660	660
coal	India	Asia	Southern Asia	Barh I power station	Unit 3		Barh STPP	660	construction	2024		supercritical	unknown					NTPC [100%]	NTPC [100.0%]	25.4865	85.7452	exact	Barh		Patna	Bihar	https://www.gem.wiki/Barh_I_power_station	L100000102092	G100000100625	INE733E01010	1	1980	1980	0	2064	2104	2144	0	0	0	0	660	660	660	660	660	660	660	660
coal	India	Asia	Southern Asia	Barh II power station	Unit 1			660	operating	2014		supercritical	unknown					NTPC [100%]	NTPC [100.0%]	25.4865	85.7452	exact	Barh		Patna	Bihar	https://www.gem.wiki/Barh_II_power_station	L100000102093	G100000100626	INE733E01010	1	1320		10	2054	2094	2134	660	660	660	660	660	660	660	660	660	660	660	660
coal	India	Asia	Southern Asia	Barh II power station	Unit 2			660	operating	2015		supercritical	unknown					NTPC [100%]	NTPC [100.0%]	25.4865	85.7452	exact	Barh		Patna	Bihar	https://www.gem.wiki/Barh_II_power_station	L100000102093	G100000100627	INE733E01010	1	1320	1320	9	2055	2095	2135	660	660	660	660	660	660	660	660	660	660	660	660
coal	India	Asia	Southern Asia	Bhilai Steel power station	Unit 2			30	operating	1982		subcritical	unknown					NTPC-SAIL Power [100%]	NTPC Ltd [50.0%]; Steel Authority of India Ltd [50.0%]	21.184	81.4237	exact	Bhilai		Durg	Chhattisgarh	https://www.gem.wiki/Bhilai_Steel_power_station	L100000102132	G100000100818	INE733E01010	0.5	560		42	2022	2062	2102	15	15	15	15	15	15	15	15	15	15	15	15
coal	India	Asia	Southern Asia	Bhilai Steel power station	Unit 3			30	operating	1983		subcritical	unknown					NTPC-SAIL Power [100%]	NTPC Ltd [50.0%]; Steel Authority of India Ltd [50.0%]	21.184	81.4237	exact	Bhilai		Durg	Chhattisgarh	https://www.gem.wiki/Bhilai_Steel_power_station	L100000102132	G100000100819	INE733E01010	0.5	560		41	2023	2063	2103	15	15	15	15	15	15	15	15	15	15	15	15
coal	India	Asia	Southern Asia	Bhilai Steel power station	Unit 4			250	operating	2009		subcritical	unknown					NTPC-SAIL Power [100%]	NTPC Ltd [50.0%]; Steel Authority of India Ltd [50.0%]	21.184	81.4237	exact	Bhilai		Durg	Chhattisgarh	https://www.gem.wiki/Bhilai_Steel_power_station	L100000102132	G100000100820	INE733E01010	0.5	560		15	2049	2089	2129	125	125	125	125	125	125	125	125	125	125	125	125
coal	India	Asia	Southern Asia	Bhilai Steel power station	Unit 5			250	operating	2009		subcritical	unknown					NTPC-SAIL Power [100%]	NTPC Ltd [50.0%]; Steel Authority of India Ltd [50.0%]	21.184	81.4237	exact	Bhilai		Durg	Chhattisgarh	https://www.gem.wiki/Bhilai_Steel_power_station	L100000102132	G100000100821	INE733E01010	0.5	560	560	15	2049	2089	2129	125	125	125	125	125	125	125	125	125	125	125	125
coal	India	Asia	Southern Asia	Bongaigaon power station	Unit 1			250	operating	2015		subcritical	bituminous					NTPC [100%]	NTPC [100.0%]	26.4444	90.3672	exact	Kumguri	Kokrajhar	Kokrajhar	Assam	https://www.gem.wiki/Bongaigaon_power_station	L100000102085	G100000101007	INE733E01010	1	750		9	2055	2095	2135	250	250	250	250	250	250	250	250	250	250	250	250
coal	India	Asia	Southern Asia	Bongaigaon power station	Unit 2			250	operating	2017		subcritical	bituminous					NTPC [100%]	NTPC [100.0%]	26.4444	90.3672	exact	Kumguri	Kokrajhar	Kokrajhar	Assam	https://www.gem.wiki/Bongaigaon_power_station	L100000102085	G100000101008	INE733E01010	1	750		7	2057	2097	2137	250	250	250	250	250	250	250	250	250	250	250	250
coal	India	Asia	Southern Asia	Bongaigaon power station	Unit 3			250	operating	2019		subcritical	bituminous					NTPC [100%]	NTPC [100.0%]	26.4444	90.3672	exact	Kumguri	Kokrajhar	Kokrajhar	Assam	https://www.gem.wiki/Bongaigaon_power_station	L100000102085	G100000101009	INE733E01010	1	750	750	5	2059	2099	2139	250	250	250	250	250	250	250	250	250	250	250	250
coal	India	Asia	Southern Asia	Darlipali power station	Phase I Unit 1		Darlipalli Super Thermal Power Station; Darlipali STPS	800	operating	2019		supercritical	unknown					NTPC [100%]	NTPC [100.0%]	21.9636	83.8919	exact	Darlipali	Lephripara	Sundergarh	Odisha	https://www.gem.wiki/Darlipali_power_station	L100000102458	G100000101987	INE733E01010	1	2400		5	2059	2099	2139	800	800	800	800	800	800	800	800	800	800	800	800
coal	India	Asia	Southern Asia	Darlipali power station	Phase I Unit 2		Darlipalli Super Thermal Power Station; Darlipali STPS	800	operating	2021		supercritical	unknown					NTPC [100%]	NTPC [100.0%]	21.9636	83.8919	exact	Darlipali	Lephripara	Sundergarh	Odisha	https://www.gem.wiki/Darlipali_power_station	L100000102458	G100000101988	INE733E01010	1	2400		3	2061	2101	2141	0	800	800	800	800	800	800	800	800	800	800	800
coal	India	Asia	Southern Asia	Darlipali power station	Phase II Unit 3		Darlipalli Super Thermal Power Station; Darlipali STPS	800	pre-permit			unknown	unknown					NTPC [100%]	NTPC [100.0%]	21.9636	83.8919	exact	Darlipali	Lephripara	Sundergarh	Odisha	https://www.gem.wiki/Darlipali_power_station	L100000102458	G100000115662	INE733E01010	1	2400	2400	-99	40	80	120	0	0	0	0	0	0	0	0	0	800	800	800
coal	India	Asia	Southern Asia	Durgapur SAIL power station	Phase 2 Unit 1			60	operating	1987		subcritical	unknown					NTPC-SAIL Power [100%]	NTPC Ltd [50.0%]; Steel Authority of India Ltd [50.0%]	23.5518	87.2485	exact	Durgapur steel mill	Durgapur	Bardhaman	West Bengal	https://www.gem.wiki/Durgapur_SAIL_power_station	L100000102671	G100000102511	INE733E01010	0.5	120		37	2027	2067	2107	30	30	30	30	30	30	30	30	30	30	30	30
coal	India	Asia	Southern Asia	Durgapur SAIL power station	Phase 2 Unit 2			60	operating	1988		subcritical	unknown					NTPC-SAIL Power [100%]	NTPC Ltd [50.0%]; Steel Authority of India Ltd [50.0%]	23.5518	87.2485	exact	Durgapur steel mill	Durgapur	Bardhaman	West Bengal	https://www.gem.wiki/Durgapur_SAIL_power_station	L100000102671	G100000102512	INE733E01010	0.5	120	120	36	2028	2068	2108	30	30	30	30	30	30	30	30	30	30	30	30
coal	India	Asia	Southern Asia	Farakka power station	Unit 1			200	operating	1986		subcritical	subbituminous					NTPC [100%]	NTPC [100.0%]	24.7727	87.8937	exact	Farakka	Farakka	Murshidabad	West Bengal	https://www.gem.wiki/Farakka_power_station	L100000102673	G100000102711	INE733E01010	1	2100		38	2026	2066	2106	200	200	200	200	200	200	200	200	200	200	200	200
coal	India	Asia	Southern Asia	Farakka power station	Unit 2			200	operating	1986		subcritical	subbituminous					NTPC [100%]	NTPC [100.0%]	24.7727	87.8937	exact	Farakka	Farakka	Murshidabad	West Bengal	https://www.gem.wiki/Farakka_power_station	L100000102673	G100000102712	INE733E01010	1	2100		38	2026	2066	2106	200	200	200	200	200	200	200	200	200	200	200	200
coal	India	Asia	Southern Asia	Farakka power station	Unit 3			200	operating	1987		subcritical	subbituminous					NTPC [100%]	NTPC [100.0%]	24.7727	87.8937	exact	Farakka	Farakka	Murshidabad	West Bengal	https://www.gem.wiki/Farakka_power_station	L100000102673	G100000102713	INE733E01010	1	2100		37	2027	2067	2107	200	200	200	200	200	200	200	200	200	200	200	200
coal	India	Asia	Southern Asia	Farakka power station	Unit 4			500	operating	1992		subcritical	subbituminous					NTPC [100%]	NTPC [100.0%]	24.7727	87.8937	exact	Farakka	Farakka	Murshidabad	West Bengal	https://www.gem.wiki/Farakka_power_station	L100000102673	G100000102714	INE733E01010	1	2100		32	2032	2072	2112	500	500	500	500	500	500	500	500	500	500	500	500
coal	India	Asia	Southern Asia	Farakka power station	Unit 5			500	operating	1994		subcritical	subbituminous					NTPC [100%]	NTPC [100.0%]	24.7727	87.8937	exact	Farakka	Farakka	Murshidabad	West Bengal	https://www.gem.wiki/Farakka_power_station	L100000102673	G100000102715	INE733E01010	1	2100		30	2034	2074	2114	500	500	500	500	500	500	500	500	500	500	500	500
coal	India	Asia	Southern Asia	Farakka power station	Unit 6			500	operating	2011		subcritical	subbituminous					NTPC [100%]	NTPC [100.0%]	24.7727	87.8937	exact	Farakka	Farakka	Murshidabad	West Bengal	https://www.gem.wiki/Farakka_power_station	L100000102673	G100000102716	INE733E01010	1	2100	2100	13	2051	2091	2131	500	500	500	500	500	500	500	500	500	500	500	500
coal	India	Asia	Southern Asia	Feroze Gandhi Unchahar Power Station	Unit 1		Unchahar plant	210	operating	1988		subcritical	bituminous					NTPC [100%]	NTPC [100.0%]	25.9138	81.3272	exact	Unchahar	Unchahar	Raebareli	Uttar Pradesh	https://www.gem.wiki/Feroze_Gandhi_Unchahar_Power_Station	L100000102626	G100000102747	INE733E01010	1	1550		36	2028	2068	2108	210	210	210	210	210	210	210	210	210	210	210	210
coal	India	Asia	Southern Asia	Feroze Gandhi Unchahar Power Station	Unit 2		Unchahar plant	210	operating	1989		subcritical	bituminous					NTPC [100%]	NTPC [100.0%]	25.9138	81.3272	exact	Unchahar	Unchahar	Raebareli	Uttar Pradesh	https://www.gem.wiki/Feroze_Gandhi_Unchahar_Power_Station	L100000102626	G100000102748	INE733E01010	1	1550		35	2029	2069	2109	210	210	210	210	210	210	210	210	210	210	210	210
coal	India	Asia	Southern Asia	Feroze Gandhi Unchahar Power Station	Unit 3		Unchahar plant	210	operating	1999		subcritical	bituminous					NTPC [100%]	NTPC [100.0%]	25.9138	81.3272	exact	Unchahar	Unchahar	Raebareli	Uttar Pradesh	https://www.gem.wiki/Feroze_Gandhi_Unchahar_Power_Station	L100000102626	G100000102749	INE733E01010	1	1550		25	2039	2079	2119	210	210	210	210	210	210	210	210	210	210	210	210
coal	India	Asia	Southern Asia	Feroze Gandhi Unchahar Power Station	Unit 4		Unchahar plant	210	operating	1999		subcritical	bituminous					NTPC [100%]	NTPC [100.0%]	25.9138	81.3272	exact	Unchahar	Unchahar	Raebareli	Uttar Pradesh	https://www.gem.wiki/Feroze_Gandhi_Unchahar_Power_Station	L100000102626	G100000102750	INE733E01010	1	1550		25	2039	2079	2119	210	210	210	210	210	210	210	210	210	210	210	210
coal	India	Asia	Southern Asia	Feroze Gandhi Unchahar Power Station	Unit 5		Unchahar plant	210	operating	2006		subcritical	bituminous					NTPC [100%]	NTPC [100.0%]	25.9138	81.3272	exact	Unchahar	Unchahar	Raebareli	Uttar Pradesh	https://www.gem.wiki/Feroze_Gandhi_Unchahar_Power_Station	L100000102626	G100000102751	INE733E01010	1	1550		18	2046	2086	2126	210	210	210	210	210	210	210	210	210	210	210	210
coal	India	Asia	Southern Asia	Feroze Gandhi Unchahar Power Station	Unit 6		Unchahar plant	500	operating	2017		subcritical	bituminous					NTPC [100%]	NTPC [100.0%]	25.9123	81.3206	exact	Unchahar		Raebareli	Uttar Pradesh	https://www.gem.wiki/Feroze_Gandhi_Unchahar_Power_Station	L100000102626	G100000102752	INE733E01010	1	1550	1550	7	2057	2097	2137	500	500	500	500	500	500	500	500	500	500	500	500
coal	India	Asia	Southern Asia	Gadarwara Super Thermal Power Project	Unit 1		Narsinghpur power station	800	operating	2018		unknown	unknown					NTPC [100%]	NTPC [100.0%]	22.8618	78.8661	exact	Chorbarheta	Gadarwara	Narsinghpur	Madhya Pradesh	https://www.gem.wiki/Gadarwara_Super_Thermal_Power_Project	L100000102332	G100000102892	INE733E01010	1	1600		6	2058	2098	2138	800	800	800	800	800	800	800	800	800	800	800	800
coal	India	Asia	Southern Asia	Gadarwara Super Thermal Power Project	Unit 2		Narsinghpur power station	800	operating	2021		unknown	unknown					NTPC [100%]	NTPC [100.0%]	22.8618	78.8661	exact	Chorbarheta	Gadarwara	Narsinghpur	Madhya Pradesh	https://www.gem.wiki/Gadarwara_Super_Thermal_Power_Project	L100000102332	G100000102893	INE733E01010	1	1600	1600	3	2061	2101	2141	0	800	800	800	800	800	800	800	800	800	800	800
coal	India	Asia	Southern Asia	Indira Gandhi Super Thermal Power Project	Unit 1		Aravali Thermal Power Project	500	operating	2010		subcritical	bituminous					Aravali Power Company [100%]	NTPC Ltd [50.0%]; Haryana Power Generation Co Ltd [25.0%]; Indraprastha Power Generation Co Ltd [25.0%]	28.4851	76.3732	exact	Jharli	Matenhail	Jhajjar	Haryana	https://www.gem.wiki/Indira_Gandhi_Super_Thermal_Power_Project	L100000102237	G100000104845	INE733E01010	0.5	1500		14	2050	2090	2130	250	250	250	250	250	250	250	250	250	250	250	250
coal	India	Asia	Southern Asia	Indira Gandhi Super Thermal Power Project	Unit 2		Aravali Thermal Power Project	500	operating	2011		subcritical	bituminous					Aravali Power Company [100%]	NTPC Ltd [50.0%]; Haryana Power Generation Co Ltd [25.0%]; Indraprastha Power Generation Co Ltd [25.0%]	28.4851	76.3732	exact	Jharli	Matenhail	Jhajjar	Haryana	https://www.gem.wiki/Indira_Gandhi_Super_Thermal_Power_Project	L100000102237	G100000104846	INE733E01010	0.5	1500		13	2051	2091	2131	250	250	250	250	250	250	250	250	250	250	250	250
coal	India	Asia	Southern Asia	Indira Gandhi Super Thermal Power Project	Unit 3		Aravali Thermal Power Project	500	operating	2012		subcritical	bituminous					Aravali Power Company [100%]	NTPC Ltd [50.0%]; Haryana Power Generation Co Ltd [25.0%]; Indraprastha Power Generation Co Ltd [25.0%]	28.4851	76.3732	exact	Jharli	Matenhail	Jhajjar	Haryana	https://www.gem.wiki/Indira_Gandhi_Super_Thermal_Power_Project	L100000102237	G100000104847	INE733E01010	0.5	1500	1500	12	2052	2092	2132	250	250	250	250	250	250	250	250	250	250	250	250
coal	India	Asia	Southern Asia	Kahalgaon Super Thermal Power Plant	Unit 1			210	operating	1992		subcritical	lignite					NTPC [100%]	NTPC [100.0%]	25.2369	87.2656	exact	Kahalgaon		Bhagalpur	Bihar	https://www.gem.wiki/Kahalgaon_Super_Thermal_Power_Plant	L100000102104	G100000105425	INE733E01010	1	2340		32	2032	2072	2112	210	210	210	210	210	210	210	210	210	210	210	210
coal	India	Asia	Southern Asia	Kahalgaon Super Thermal Power Plant	Unit 2			210	operating	1994		subcritical	lignite					NTPC [100%]	NTPC [100.0%]	25.2369	87.2656	exact	Kahalgaon		Bhagalpur	Bihar	https://www.gem.wiki/Kahalgaon_Super_Thermal_Power_Plant	L100000102104	G100000105426	INE733E01010	1	2340		30	2034	2074	2114	210	210	210	210	210	210	210	210	210	210	210	210
coal	India	Asia	Southern Asia	Kahalgaon Super Thermal Power Plant	Unit 3			210	operating	1995		subcritical	lignite					NTPC [100%]	NTPC [100.0%]	25.2369	87.2656	exact	Kahalgaon		Bhagalpur	Bihar	https://www.gem.wiki/Kahalgaon_Super_Thermal_Power_Plant	L100000102104	G100000105427	INE733E01010	1	2340		29	2035	2075	2115	210	210	210	210	210	210	210	210	210	210	210	210
coal	India	Asia	Southern Asia	Kahalgaon Super Thermal Power Plant	Unit 4			210	operating	1996		subcritical	lignite					NTPC [100%]	NTPC [100.0%]	25.2369	87.2656	exact	Kahalgaon		Bhagalpur	Bihar	https://www.gem.wiki/Kahalgaon_Super_Thermal_Power_Plant	L100000102104	G100000105428	INE733E01010	1	2340		28	2036	2076	2116	210	210	210	210	210	210	210	210	210	210	210	210
coal	India	Asia	Southern Asia	Kahalgaon Super Thermal Power Plant	Unit 5			500	operating	2008		subcritical	lignite					NTPC [100%]	NTPC [100.0%]	25.2369	87.2656	exact	Kahalgaon		Bhagalpur	Bihar	https://www.gem.wiki/Kahalgaon_Super_Thermal_Power_Plant	L100000102104	G100000105429	INE733E01010	1	2340		16	2048	2088	2128	500	500	500	500	500	500	500	500	500	500	500	500
coal	India	Asia	Southern Asia	Kahalgaon Super Thermal Power Plant	Unit 6			500	operating	2009		subcritical	lignite					NTPC [100%]	NTPC [100.0%]	25.2369	87.2656	exact	Kahalgaon		Bhagalpur	Bihar	https://www.gem.wiki/Kahalgaon_Super_Thermal_Power_Plant	L100000102104	G100000105430	INE733E01010	1	2340		15	2049	2089	2129	500	500	500	500	500	500	500	500	500	500	500	500
coal	India	Asia	Southern Asia	Kahalgaon Super Thermal Power Plant	Unit 7			500	operating	2010		subcritical	lignite					NTPC [100%]	NTPC [100.0%]	25.2369	87.2656	exact	Kahalgaon		Bhagalpur	Bihar	https://www.gem.wiki/Kahalgaon_Super_Thermal_Power_Plant	L100000102104	G100000105431	INE733E01010	1	2340	2340	14	2050	2090	2130	500	500	500	500	500	500	500	500	500	500	500	500
coal	India	Asia	Southern Asia	Katwa Super Thermal Power Project (NTPC)	Unit 1			660	shelved			supercritical	unknown					NTPC [100%]	NTPC [100.0%]	23.65	88.13	approximate	Katwa		Bardhaman	West Bengal	https://www.gem.wiki/Katwa_Super_Thermal_Power_Project_(NTPC)	L100000102676	G100000105623	INE733E01010	1	1320		-99	40	80	120	0	0	0	0	0	0	0	0	0	0	0	0
coal	India	Asia	Southern Asia	Katwa Super Thermal Power Project (NTPC)	Unit 2			660	shelved			supercritical	unknown					NTPC [100%]	NTPC [100.0%]	23.65	88.13	approximate	Katwa		Bardhaman	West Bengal	https://www.gem.wiki/Katwa_Super_Thermal_Power_Project_(NTPC)	L100000102676	G100000105624	INE733E01010	1	1320		-99	40	80	120	0	0	0	0	0	0	0	0	0	0	0	0
coal	India	Asia	Southern Asia	Khargone power station	Unit 1			660	operating	2019		ultra-supercritical	unknown					NTPC [100%]	NTPC [100.0%]	22.0652	75.8519	exact	Selda	Barwah	Khargone	Madhya Pradesh	https://www.gem.wiki/Khargone_power_station	L100000102345	G100000105722	INE733E01010	1	1320		5	2059	2099	2139	660	660	660	660	660	660	660	660	660	660	660	660
coal	India	Asia	Southern Asia	Khargone power station	Unit 2			660	operating	2020		ultra-supercritical	unknown					NTPC [100%]	NTPC [100.0%]	22.0652	75.8519	exact	Selda	Barwah	Khargone	Madhya Pradesh	https://www.gem.wiki/Khargone_power_station	L100000102345	G100000105723	INE733E01010	1	1320		4	2060	2100	2140	660	660	660	660	660	660	660	660	660	660	660	660
coal	India	Asia	Southern Asia	Khurja power station	Unit 1			660	construction	2024		supercritical	unknown					THDC India [100%]	NTPC Ltd [74.5%]; State of Uttar Pradesh [25.5%]	28.1583	77.9083	exact	Naiphal	Khurja	Bulandshahar	Uttar Pradesh	https://www.gem.wiki/Khurja_power_station	L100000102636	G100000105727	INE733E01010	0.745	1320		0	2064	2104	2144	0	0	0	0	491.7	491.7	491.7	491.7	491.7	491.7	491.7	491.7
coal	India	Asia	Southern Asia	Khurja power station	Unit 2			660	construction	2024		supercritical	unknown					THDC India [100%]	NTPC Ltd [74.5%]; State of Uttar Pradesh [25.5%]	28.1583	77.9083	exact	Naiphal	Khurja	Bulandshahar	Uttar Pradesh	https://www.gem.wiki/Khurja_power_station	L100000102636	G100000112418	INE733E01010	0.745	1320	1320	0	2064	2104	2144	0	0	0	0	491.7	491.7	491.7	491.7	491.7	491.7	491.7	491.7
coal	India	Asia	Southern Asia	Korba Super Thermal Power Station (NTPC)	Unit 1		Korba III power station (Unit 7) (Unit 7 (Korba III))	200	operating	1983		subcritical	bituminous					NTPC [100%]	NTPC [100.0%]	22.3874	82.6819	exact	Kusmunda	Katghora	Korba	Chhattisgarh	https://www.gem.wiki/Korba_Super_Thermal_Power_Station_(NTPC)	L100000102157	G100000105864	INE733E01010	1	2600		41	2023	2063	2103	200	200	200	200	200	200	200	200	200	200	200	200
coal	India	Asia	Southern Asia	Korba Super Thermal Power Station (NTPC)	Unit 2		Korba III power station (Unit 7) (Unit 7 (Korba III))	200	operating	1983		subcritical	bituminous					NTPC [100%]	NTPC [100.0%]	22.3874	82.6819	exact	Kusmunda	Katghora	Korba	Chhattisgarh	https://www.gem.wiki/Korba_Super_Thermal_Power_Station_(NTPC)	L100000102157	G100000105865	INE733E01010	1	2600		41	2023	2063	2103	200	200	200	200	200	200	200	200	200	200	200	200
coal	India	Asia	Southern Asia	Korba Super Thermal Power Station (NTPC)	Unit 3		Korba III power station (Unit 7) (Unit 7 (Korba III))	200	operating	1984		subcritical	bituminous					NTPC [100%]	NTPC [100.0%]	22.3874	82.6819	exact	Kusmunda	Katghora	Korba	Chhattisgarh	https://www.gem.wiki/Korba_Super_Thermal_Power_Station_(NTPC)	L100000102157	G100000105866	INE733E01010	1	2600		40	2024	2064	2104	200	200	200	200	200	200	200	200	200	200	200	200
coal	India	Asia	Southern Asia	Korba Super Thermal Power Station (NTPC)	Unit 4		Korba III power station (Unit 7) (Unit 7 (Korba III))	500	operating	1987		subcritical	bituminous					NTPC [100%]	NTPC [100.0%]	22.3874	82.6819	exact	Kusmunda	Katghora	Korba	Chhattisgarh	https://www.gem.wiki/Korba_Super_Thermal_Power_Station_(NTPC)	L100000102157	G100000105867	INE733E01010	1	2600		37	2027	2067	2107	500	500	500	500	500	500	500	500	500	500	500	500
coal	India	Asia	Southern Asia	Korba Super Thermal Power Station (NTPC)	Unit 5		Korba III power station (Unit 7) (Unit 7 (Korba III))	500	operating	1988		subcritical	bituminous					NTPC [100%]	NTPC [100.0%]	22.3874	82.6819	exact	Kusmunda	Katghora	Korba	Chhattisgarh	https://www.gem.wiki/Korba_Super_Thermal_Power_Station_(NTPC)	L100000102157	G100000105868	INE733E01010	1	2600		36	2028	2068	2108	500	500	500	500	500	500	500	500	500	500	500	500
coal	India	Asia	Southern Asia	Korba Super Thermal Power Station (NTPC)	Unit 6		Korba III power station (Unit 7) (Unit 7 (Korba III))	500	operating	1989		subcritical	bituminous					NTPC [100%]	NTPC [100.0%]	22.3874	82.6819	exact	Kusmunda	Katghora	Korba	Chhattisgarh	https://www.gem.wiki/Korba_Super_Thermal_Power_Station_(NTPC)	L100000102157	G100000105869	INE733E01010	1	2600		35	2029	2069	2109	500	500	500	500	500	500	500	500	500	500	500	500
coal	India	Asia	Southern Asia	Korba Super Thermal Power Station (NTPC)	Unit 7 (Korba III)		Korba III power station (Unit 7) (Unit 7 (Korba III))	500	operating	2010		subcritical	bituminous					NTPC [100%]	NTPC [100.0%]	22.3881	82.6858	exact	Kusmunda	Katghora	Korba	Chhattisgarh	https://www.gem.wiki/Korba_Super_Thermal_Power_Station_(NTPC)	L100000102157	G100000105870	INE733E01010	1	2600	2600	14	2050	2090	2130	500	500	500	500	500	500	500	500	500	500	500	500
coal	India	Asia	Southern Asia	Kudgi Super Thermal Power Project	Unit 1			800	operating	2016		supercritical	unknown					NTPC [100%]	NTPC [100.0%]	16.4995	75.8346	exact	Kudgi		Bijapur	Karnataka	https://www.gem.wiki/Kudgi_Super_Thermal_Power_Project	L100000102306	G100000106008	INE733E01010	1	2400		8	2056	2096	2136	800	800	800	800	800	800	800	800	800	800	800	800
coal	India	Asia	Southern Asia	Kudgi Super Thermal Power Project	Unit 2			800	operating	2017		supercritical	unknown					NTPC [100%]	NTPC [100.0%]	16.4995	75.8346	exact	Kudgi		Bijapur	Karnataka	https://www.gem.wiki/Kudgi_Super_Thermal_Power_Project	L100000102306	G100000106009	INE733E01010	1	2400		7	2057	2097	2137	800	800	800	800	800	800	800	800	800	800	800	800
coal	India	Asia	Southern Asia	Kudgi Super Thermal Power Project	Unit 3			800	operating	2018		supercritical	unknown					NTPC [100%]	NTPC [100.0%]	16.4995	75.8346	exact	Kudgi		Bijapur	Karnataka	https://www.gem.wiki/Kudgi_Super_Thermal_Power_Project	L100000102306	G100000106010	INE733E01010	1	2400	2400	6	2058	2098	2138	800	800	800	800	800	800	800	800	800	800	800	800
coal	India	Asia	Southern Asia	Lara Integrated Thermal Power Project	Unit 1		NTPC Lara, Lara STPP	800	operating	2018		supercritical	unknown					NTPC [100%]	NTPC [100.0%]	21.7577	83.4575	exact	Mahloi	Pussore	Raigarh	Chhattisgarh	https://www.gem.wiki/Lara_Integrated_Thermal_Power_Project	L100000102164	G100000106174	INE733E01010	1	3200		6	2058	2098	2138	800	800	800	800	800	800	800	800	800	800	800	800
coal	India	Asia	Southern Asia	Lara Integrated Thermal Power Project	Unit 2		NTPC Lara, Lara STPP	800	operating	2020		supercritical	unknown					NTPC [100%]	NTPC [100.0%]	21.7577	83.4575	exact	Mahloi	Pussore	Raigarh	Chhattisgarh	https://www.gem.wiki/Lara_Integrated_Thermal_Power_Project	L100000102164	G100000106175	INE733E01010	1	3200		4	2060	2100	2140	800	800	800	800	800	800	800	800	800	800	800	800
coal	India	Asia	Southern Asia	Lara Integrated Thermal Power Project	Unit 3		NTPC Lara, Lara STPP	800	permitted	2028		supercritical	unknown					NTPC [100%]	NTPC [100.0%]	21.7577	83.4575	exact	Mahloi	Pussore	Raigarh	Chhattisgarh	https://www.gem.wiki/Lara_Integrated_Thermal_Power_Project	L100000102164	G100000106176	INE733E01010	1	3200		-4	2068	2108	2148	0	0	0	0	0	0	0	0	800	800	800	800
coal	India	Asia	Southern Asia	Lara Integrated Thermal Power Project	Unit 4		NTPC Lara, Lara STPP	800	permitted	2028		supercritical	unknown					NTPC [100%]	NTPC [100.0%]	21.7577	83.4575	exact	Mahloi	Pussore	Raigarh	Chhattisgarh	https://www.gem.wiki/Lara_Integrated_Thermal_Power_Project	L100000102164	G100000106177	INE733E01010	1	3200	3200	-4	2068	2108	2148	0	0	0	0	0	0	0	0	800	800	800	800
coal	India	Asia	Southern Asia	Mauda power station	Unit 1		Mouda Super Thermal Power Project	500	operating	2012		subcritical	unknown					NTPC [100%]	NTPC [100.0%]	21.1807	79.3965	exact		Mouda	Nabpur	Maharashtra	https://www.gem.wiki/Mauda_power_station	L100000102415	G100000106746	INE733E01010	1	2320		12	2052	2092	2132	500	500	500	500	500	500	500	500	500	500	500	500
coal	India	Asia	Southern Asia	Mauda power station	Unit 2		Mouda Super Thermal Power Project	500	operating	2013		subcritical	unknown					NTPC [100%]	NTPC [100.0%]	21.1807	79.3965	exact		Mouda	Nabpur	Maharashtra	https://www.gem.wiki/Mauda_power_station	L100000102415	G100000106747	INE733E01010	1	2320		11	2053	2093	2133	500	500	500	500	500	500	500	500	500	500	500	500
coal	India	Asia	Southern Asia	Mauda power station	Unit 3		Mouda Super Thermal Power Project	660	operating	2016		supercritical	unknown					NTPC [100%]	NTPC [100.0%]	21.1807	79.3965	exact		Mouda	Nabpur	Maharashtra	https://www.gem.wiki/Mauda_power_station	L100000102415	G100000106748	INE733E01010	1	2320		8	2056	2096	2136	660	660	660	660	660	660	660	660	660	660	660	660
coal	India	Asia	Southern Asia	Mauda power station	Unit 4		Mouda Super Thermal Power Project	660	operating	2017		supercritical	unknown					NTPC [100%]	NTPC [100.0%]	21.1807	79.3965	exact		Mouda	Nabpur	Maharashtra	https://www.gem.wiki/Mauda_power_station	L100000102415	G100000106749	INE733E01010	1	2320	2320	7	2057	2097	2137	660	660	660	660	660	660	660	660	660	660	660	660
coal	India	Asia	Southern Asia	Meja Thermal Power Project	Stage I Unit 1			660	operating	2018		supercritical	unknown					Meja Urja Nigam [100%]	NTPC Ltd [50.0%]; Uttar Pradesh Rajya Vidyut Utpadan Nigam Ltd [50.0%]	25.1459	81.9401	exact	Meja		Allahabad	Uttar Pradesh	https://www.gem.wiki/Meja_Thermal_Power_Project	L100000102640	G100000106821	INE733E01010	0.5	3720		6	2058	2098	2138	330	330	330	330	330	330	330	330	330	330	330	330
coal	India	Asia	Southern Asia	Meja Thermal Power Project	Stage I Unit 2			660	operating	2021		supercritical	unknown					Meja Urja Nigam [100%]	NTPC Ltd [50.0%]; Uttar Pradesh Rajya Vidyut Utpadan Nigam Ltd [50.0%]	25.1459	81.9401	exact	Meja		Allahabad	Uttar Pradesh	https://www.gem.wiki/Meja_Thermal_Power_Project	L100000102640	G100000106822	INE733E01010	0.5	3720		3	2061	2101	2141	0	330	330	330	330	330	330	330	330	330	330	330
coal	India	Asia	Southern Asia	Meja Thermal Power Project	Stage II Unit 3			800	pre-permit			unknown	unknown					Meja Urja Nigam [100%]	NTPC Ltd [50.0%]; Uttar Pradesh Rajya Vidyut Utpadan Nigam Ltd [50.0%]	25.1459	81.9401	exact	Meja		Allahabad	Uttar Pradesh	https://www.gem.wiki/Meja_Thermal_Power_Project	L100000102640	G100000115761	INE733E01010	0.5	3720		-99	40	80	120	0	0	0	0	0	0	0	0	0	400	400	400
coal	India	Asia	Southern Asia	Meja Thermal Power Project	Stage II Unit 4			800	pre-permit			unknown	unknown					Meja Urja Nigam [100%]	NTPC Ltd [50.0%]; Uttar Pradesh Rajya Vidyut Utpadan Nigam Ltd [50.0%]	25.1459	81.9401	exact	Meja		Allahabad	Uttar Pradesh	https://www.gem.wiki/Meja_Thermal_Power_Project	L100000102640	G100000115762	INE733E01010	0.5	3720		-99	40	80	120	0	0	0	0	0	0	0	0	0	400	400	400
coal	India	Asia	Southern Asia	Meja Thermal Power Project	Stage II Unit 5			800	pre-permit			unknown	unknown					Meja Urja Nigam [100%]	NTPC Ltd [50.0%]; Uttar Pradesh Rajya Vidyut Utpadan Nigam Ltd [50.0%]	25.1459	81.9401	exact	Meja		Allahabad	Uttar Pradesh	https://www.gem.wiki/Meja_Thermal_Power_Project	L100000102640	G100001000259	INE733E01010	0.5	3720	3720	-99	40	80	120	0	0	0	0	0	0	0	0	0	400	400	400
coal	India	Asia	Southern Asia	Muzaffarpur power station	Unit 3		Kanti power station, Kanti Muzaffarpur power station	195	operating	2015		subcritical	bituminous					Kanti Bijlee Utpadan Nigam [100%]	NTPC Ltd [100.0%]	26.1948	85.3033	exact	Kanti		Muzaffarpur	Bihar	https://www.gem.wiki/Muzaffarpur_power_station	L100000102112	G100000107144	INE733E01010	1	390		9	2055	2095	2135	195	195	195	195	195	195	195	195	195	195	195	195
coal	India	Asia	Southern Asia	Muzaffarpur power station	Unit 4		Kanti power station, Kanti Muzaffarpur power station	195	operating	2017		unknown	unknown					Kanti Bijlee Utpadan Nigam [100%]	NTPC Ltd [100.0%]	26.1948	85.3033	exact	Kanti		Muzaffarpur	Bihar	https://www.gem.wiki/Muzaffarpur_power_station	L100000102112	G100000107145	INE733E01010	1	390	390	7	2057	2097	2137	195	195	195	195	195	195	195	195	195	195	195	195
coal	India	Asia	Southern Asia	Nabinagar Super Thermal Power Project	Unit 1		New Nabi Nagar	660	operating	2019		supercritical	unknown					Nabinagar Power Generating Company [100%]	NTPC Ltd [100.0%]	24.776	84.158	exact	Majhiyan and Ankorha	Nabinagar	Aurangabad	Bihar	https://www.gem.wiki/Nabinagar_Super_Thermal_Power_Project	L100000102113	G100000107158	INE733E01010	1	1980		5	2059	2099	2139	660	660	660	660	660	660	660	660	660	660	660	660
coal	India	Asia	Southern Asia	Nabinagar Super Thermal Power Project	Unit 2		New Nabi Nagar	660	operating	2021		supercritical	unknown					Nabinagar Power Generating Company [100%]	NTPC Ltd [100.0%]	24.776	84.158	exact	Majhiyan and Ankorha	Nabinagar	Aurangabad	Bihar	https://www.gem.wiki/Nabinagar_Super_Thermal_Power_Project	L100000102113	G100000107159	INE733E01010	1	1980		3	2061	2101	2141	0	660	660	660	660	660	660	660	660	660	660	660
coal	India	Asia	Southern Asia	Nabinagar Super Thermal Power Project	Unit 3		New Nabi Nagar	660	operating	2022		supercritical	unknown					Nabinagar Power Generating Company [100%]	NTPC Ltd [100.0%]	24.776	84.158	exact	Majhiyan and Ankorha	Nabinagar	Aurangabad	Bihar	https://www.gem.wiki/Nabinagar_Super_Thermal_Power_Project	L100000102113	G100000107160	INE733E01010	1	1980	1980	2	2062	2102	2142	0	0	660	660	660	660	660	660	660	660	660	660
coal	India	Asia	Southern Asia	Nabinagar Thermal Power Project	Unit 1		Nabi Nagar TPP	250	operating	2016		subcritical	unknown					Bhartiya Rail Bijlee [100%]	NTPC Ltd [74.0%]; Indian Railways [26.0%]	24.7051	84.0887	exact	Dhundwa	Nabinagar	Aurangabad	Bihar	https://www.gem.wiki/Nabinagar_Thermal_Power_Project	L100000102114	G100000107161	INE733E01010	0.74	1000		8	2056	2096	2136	185	185	185	185	185	185	185	185	185	185	185	185
coal	India	Asia	Southern Asia	Nabinagar Thermal Power Project	Unit 2		Nabi Nagar TPP	250	operating	2017		subcritical	unknown					Bhartiya Rail Bijlee [100%]	NTPC Ltd [74.0%]; Indian Railways [26.0%]	24.7051	84.0887	exact	Dhundwa	Nabinagar	Aurangabad	Bihar	https://www.gem.wiki/Nabinagar_Thermal_Power_Project	L100000102114	G100000107162	INE733E01010	0.74	1000		7	2057	2097	2137	185	185	185	185	185	185	185	185	185	185	185	185
coal	India	Asia	Southern Asia	Nabinagar Thermal Power Project	Unit 3		Nabi Nagar TPP	250	operating	2019		subcritical	unknown					Bhartiya Rail Bijlee [100%]	NTPC Ltd [74.0%]; Indian Railways [26.0%]	24.7051	84.0887	exact	Dhundwa	Nabinagar	Aurangabad	Bihar	https://www.gem.wiki/Nabinagar_Thermal_Power_Project	L100000102114	G100000107163	INE733E01010	0.74	1000		5	2059	2099	2139	185	185	185	185	185	185	185	185	185	185	185	185
coal	India	Asia	Southern Asia	Nabinagar Thermal Power Project	Unit 4		Nabi Nagar TPP	250	operating	2021		subcritical	unknown					Bhartiya Rail Bijlee [100%]	NTPC Ltd [74.0%]; Indian Railways [26.0%]	24.7051	84.0887	exact	Dhundwa	Nabinagar	Aurangabad	Bihar	https://www.gem.wiki/Nabinagar_Thermal_Power_Project	L100000102114	G100000107164	INE733E01010	0.74	1000	1000	3	2061	2101	2141	0	185	185	185	185	185	185	185	185	185	185	185
coal	India	Asia	Southern Asia	National Capital Dadri Thermal Power Plant	Stage I Unit 1		NCTPP; NTPC Dadri	210	operating	1991		subcritical	unknown					NTPC [100%]	NTPC [100.0%]	28.603	77.6078	exact	Dadri	Dadri	Gautam Buddha Nagar	Uttar Pradesh	https://www.gem.wiki/National_Capital_Dadri_Thermal_Power_Plant	L100000102642	G100000107306	INE733E01010	1	1820		33	2031	2071	2111	210	210	210	210	210	210	210	210	210	210	210	210
coal	India	Asia	Southern Asia	National Capital Dadri Thermal Power Plant	Stage I Unit 2		NCTPP; NTPC Dadri	210	operating	1992		subcritical	unknown					NTPC [100%]	NTPC [100.0%]	28.603	77.6078	exact	Dadri	Dadri	Gautam Buddha Nagar	Uttar Pradesh	https://www.gem.wiki/National_Capital_Dadri_Thermal_Power_Plant	L100000102642	G100000107307	INE733E01010	1	1820		32	2032	2072	2112	210	210	210	210	210	210	210	210	210	210	210	210
coal	India	Asia	Southern Asia	National Capital Dadri Thermal Power Plant	Stage I Unit 3		NCTPP; NTPC Dadri	210	operating	1993		subcritical	unknown					NTPC [100%]	NTPC [100.0%]	28.603	77.6078	exact	Dadri	Dadri	Gautam Buddha Nagar	Uttar Pradesh	https://www.gem.wiki/National_Capital_Dadri_Thermal_Power_Plant	L100000102642	G100000107308	INE733E01010	1	1820		31	2033	2073	2113	210	210	210	210	210	210	210	210	210	210	210	210
coal	India	Asia	Southern Asia	National Capital Dadri Thermal Power Plant	Stage I Unit 4		NCTPP; NTPC Dadri	210	operating	1994		subcritical	unknown					NTPC [100%]	NTPC [100.0%]	28.603	77.6078	exact	Dadri	Dadri	Gautam Buddha Nagar	Uttar Pradesh	https://www.gem.wiki/National_Capital_Dadri_Thermal_Power_Plant	L100000102642	G100000107309	INE733E01010	1	1820		30	2034	2074	2114	210	210	210	210	210	210	210	210	210	210	210	210
coal	India	Asia	Southern Asia	National Capital Dadri Thermal Power Plant	Stage II Unit 5		NCTPP; NTPC Dadri	490	operating	2010		subcritical	unknown					NTPC [100%]	NTPC [100.0%]	28.603	77.6078	exact	Dadri	Dadri	Gautam Budh Nagar	Uttar Pradesh	https://www.gem.wiki/National_Capital_Dadri_Thermal_Power_Plant	L100000102642	G100000107310	INE733E01010	1	1820		14	2050	2090	2130	490	490	490	490	490	490	490	490	490	490	490	490
coal	India	Asia	Southern Asia	National Capital Dadri Thermal Power Plant	Stage II Unit 6		NCTPP; NTPC Dadri	490	operating	2010		subcritical	unknown					NTPC [100%]	NTPC [100.0%]	28.603	77.6078	exact	Dadri	Dadri	Gautam Budh Nagar	Uttar Pradesh	https://www.gem.wiki/National_Capital_Dadri_Thermal_Power_Plant	L100000102642	G100000107311	INE733E01010	1	1820	1820	14	2050	2090	2130	490	490	490	490	490	490	490	490	490	490	490	490
coal	India	Asia	Southern Asia	North Karanpura power station	Unit 1			660	operating	2023		supercritical	unknown					NTPC [100%]	NTPC [100.0%]	23.8508	85.0124	exact	Tandwa town		Chatra	Jharkhand	https://www.gem.wiki/North_Karanpura_power_station	L100000102278	G100000107506	INE733E01010	1	1980		1	2063	2103	2143	0	0	0	660	660	660	660	660	660	660	660	660
coal	India	Asia	Southern Asia	North Karanpura power station	Unit 2			660	construction	2024		supercritical	unknown					NTPC [100%]	NTPC [100.0%]	23.8508	85.0124	exact	Tandwa town		Chatra	Jharkhand	https://www.gem.wiki/North_Karanpura_power_station	L100000102278	G100000107507	INE733E01010	1	1980		0	2064	2104	2144	0	0	0	0	660	660	660	660	660	660	660	660
coal	India	Asia	Southern Asia	North Karanpura power station	Unit 3			660	construction	2024		supercritical	unknown					NTPC [100%]	NTPC [100.0%]	23.8508	85.0124	exact	Tandwa town		Chatra	Jharkhand	https://www.gem.wiki/North_Karanpura_power_station	L100000102278	G100000107508	INE733E01010	1	1980	1980	0	2064	2104	2144	0	0	0	0	660	660	660	660	660	660	660	660
coal	India	Asia	Southern Asia	NTPC Seoni power station	Phase 1		Jhabua Power Seoni power station	600	operating	2016		subcritical	unknown					Jhabua Power [100%]	NTPC Ltd [50.0%]; other unknown/mixed entity types [41.3%]; Yes Bank Ltd [8.7%]	22.7355	79.9123	exact	Barela and Gorakhpur	Ghansore	Seoni	Madhya Pradesh	https://www.gem.wiki/NTPC_Seoni_power_station	L100000102340	G100000105026	INE733E01010	0.5	1200		8	2056	2096	2136	300	300	300	300	300	300	300	300	300	300	300	300
coal	India	Asia	Southern Asia	NTPC Seoni power station	Phase 2		Jhabua Power Seoni power station	600	permitted			subcritical	unknown					Jhabua Power [100%]	NTPC Ltd [50.0%]; other unknown/mixed entity types [41.3%]; Yes Bank Ltd [8.7%]	22.7355	79.9123	exact	Barela and Gorakhpur	Ghansore	Seoni	Madhya Pradesh	https://www.gem.wiki/NTPC_Seoni_power_station	L100000102340	G100000105027	INE733E01010	0.5	1200	1200	-99	40	80	120	0	0	0	0	0	0	0	0	0	300	300	300
coal	India	Asia	Southern Asia	Obra Thermal Power Station	D Unit 1			800	announced	2027		ultra-supercritical	unknown					State of Uttar Pradesh [50%]; NTPC [50%]	NTPC [50.0%]; State of Uttar Pradesh [50.0%]	24.4445	82.98	exact			Sonbhadra	Uttar Pradesh	https://www.gem.wiki/Obra_Thermal_Power_Station	L100000102644	G100000115946	INE733E01010	0.5	1600		-3	2067	2107	2147	0	0	0	0	0	0	0	800	800	800	800	800
coal	India	Asia	Southern Asia	Obra Thermal Power Station	D Unit 2			800	announced	2028		ultra-supercritical	unknown					State of Uttar Pradesh [50%]; NTPC [50%]	NTPC [50.0%]; State of Uttar Pradesh [50.0%]	24.4445	82.98	exact			Sonbhadra	Uttar Pradesh	https://www.gem.wiki/Obra_Thermal_Power_Station	L100000102644	G100000115947	INE733E01010	0.5	1600	1600	-4	2068	2108	2148	0	0	0	0	0	0	0	0	800	800	800	800
coal	India	Asia	Southern Asia	Patratu JSEB power station	Unit 11		Patratu UMPP	800	construction	2024		supercritical	unknown					Jharkhand State Electricity Board; NTPC	Jharkhand State Electricity Board; NTPC	23.64	85.2931	exact	Patratu	Patratu	Ramgarh	Jharkhand	https://www.gem.wiki/Patratu_JSEB_power_station	L100000102281	G100000107870	INE733E01010	0.5	2400		0	2064	2104	2144	0	0	0	0	400	400	400	400	400	400	400	400
coal	India	Asia	Southern Asia	Patratu JSEB power station	Unit 12		Patratu UMPP	800	construction	2025		supercritical	unknown					Jharkhand State Electricity Board; NTPC	Jharkhand State Electricity Board; NTPC	23.64	85.2931	exact	Patratu	Patratu	Ramgarh	Jharkhand	https://www.gem.wiki/Patratu_JSEB_power_station	L100000102281	G100000107871	INE733E01010	0.5	2400		-1	2065	2105	2145	0	0	0	0	0	400	400	400	400	400	400	400
coal	India	Asia	Southern Asia	Patratu JSEB power station	Unit 13		Patratu UMPP	800	construction	2025		supercritical	unknown					Jharkhand State Electricity Board; NTPC	Jharkhand State Electricity Board; NTPC	23.64	85.2931	exact	Patratu	Patratu	Ramgarh	Jharkhand	https://www.gem.wiki/Patratu_JSEB_power_station	L100000102281	G100000107872	INE733E01010	0.5	2400	2400	-1	2065	2105	2145	0	0	0	0	0	400	400	400	400	400	400	400
coal	India	Asia	Southern Asia	Ramagundam power station	Stage I Unit 1		Telangana TPP (Stage IV Unit 8, Stage IV Unit 9, Stage V Unit 10, Stage V Unit 11, Stage V Unit 12), Telangana super thermal power project (Stage IV Unit 8, Stage IV Unit 9, Stage V Unit 10, Stage V Unit 11, Stage V Unit 12)	200	operating	1983		subcritical	bituminous					NTPC [100%]	NTPC [100.0%]	18.7585	79.4573	exact	Ramagundam	Ramagundam	Karimnagar	Telangana	https://www.gem.wiki/Ramagundam_power_station	L100000102602	G100000108463	INE733E01010	1	4200		41	2023	2063	2103	200	200	200	200	200	200	200	200	200	200	200	200
coal	India	Asia	Southern Asia	Ramagundam power station	Stage I Unit 2		Telangana TPP (Stage IV Unit 8, Stage IV Unit 9, Stage V Unit 10, Stage V Unit 11, Stage V Unit 12), Telangana super thermal power project (Stage IV Unit 8, Stage IV Unit 9, Stage V Unit 10, Stage V Unit 11, Stage V Unit 12)	200	operating	1984		subcritical	bituminous					NTPC [100%]	NTPC [100.0%]	18.7585	79.4573	exact	Ramagundam	Ramagundam	Karimnagar	Telangana	https://www.gem.wiki/Ramagundam_power_station	L100000102602	G100000108464	INE733E01010	1	4200		40	2024	2064	2104	200	200	200	200	200	200	200	200	200	200	200	200
coal	India	Asia	Southern Asia	Ramagundam power station	Stage I Unit 3		Telangana TPP (Stage IV Unit 8, Stage IV Unit 9, Stage V Unit 10, Stage V Unit 11, Stage V Unit 12), Telangana super thermal power project (Stage IV Unit 8, Stage IV Unit 9, Stage V Unit 10, Stage V Unit 11, Stage V Unit 12)	200	operating	1984		subcritical	bituminous					NTPC [100%]	NTPC [100.0%]	18.7585	79.4573	exact	Ramagundam	Ramagundam	Karimnagar	Telangana	https://www.gem.wiki/Ramagundam_power_station	L100000102602	G100000108465	INE733E01010	1	4200		40	2024	2064	2104	200	200	200	200	200	200	200	200	200	200	200	200
coal	India	Asia	Southern Asia	Ramagundam power station	Stage II Unit 4		Telangana TPP (Stage IV Unit 8, Stage IV Unit 9, Stage V Unit 10, Stage V Unit 11, Stage V Unit 12), Telangana super thermal power project (Stage IV Unit 8, Stage IV Unit 9, Stage V Unit 10, Stage V Unit 11, Stage V Unit 12)	500	operating	1988		subcritical	bituminous					NTPC [100%]	NTPC [100.0%]	18.7585	79.4573	exact	Ramagundam	Ramagundam	Karimnagar	Telangana	https://www.gem.wiki/Ramagundam_power_station	L100000102602	G100000108466	INE733E01010	1	4200		36	2028	2068	2108	500	500	500	500	500	500	500	500	500	500	500	500
coal	India	Asia	Southern Asia	Ramagundam power station	Stage II Unit 5		Telangana TPP (Stage IV Unit 8, Stage IV Unit 9, Stage V Unit 10, Stage V Unit 11, Stage V Unit 12), Telangana super thermal power project (Stage IV Unit 8, Stage IV Unit 9, Stage V Unit 10, Stage V Unit 11, Stage V Unit 12)	500	operating	1989		subcritical	bituminous					NTPC [100%]	NTPC [100.0%]	18.7585	79.4573	exact	Ramagundam	Ramagundam	Karimnagar	Telangana	https://www.gem.wiki/Ramagundam_power_station	L100000102602	G100000108467	INE733E01010	1	4200		35	2029	2069	2109	500	500	500	500	500	500	500	500	500	500	500	500
coal	India	Asia	Southern Asia	Ramagundam power station	Stage II Unit 6		Telangana TPP (Stage IV Unit 8, Stage IV Unit 9, Stage V Unit 10, Stage V Unit 11, Stage V Unit 12), Telangana super thermal power project (Stage IV Unit 8, Stage IV Unit 9, Stage V Unit 10, Stage V Unit 11, Stage V Unit 12)	500	operating	1989		subcritical	bituminous					NTPC [100%]	NTPC [100.0%]	18.7585	79.4573	exact	Ramagundam	Ramagundam	Karimnagar	Telangana	https://www.gem.wiki/Ramagundam_power_station	L100000102602	G100000108468	INE733E01010	1	4200		35	2029	2069	2109	500	500	500	500	500	500	500	500	500	500	500	500
coal	India	Asia	Southern Asia	Ramagundam power station	Stage III Unit 7		Telangana TPP (Stage IV Unit 8, Stage IV Unit 9, Stage V Unit 10, Stage V Unit 11, Stage V Unit 12), Telangana super thermal power project (Stage IV Unit 8, Stage IV Unit 9, Stage V Unit 10, Stage V Unit 11, Stage V Unit 12)	500	operating	2005		subcritical	bituminous					NTPC [100%]	NTPC [100.0%]	18.7585	79.4573	exact	Ramagundam	Ramagundam	Karimnagar	Telangana	https://www.gem.wiki/Ramagundam_power_station	L100000102602	G100000108469	INE733E01010	1	4200		19	2045	2085	2125	500	500	500	500	500	500	500	500	500	500	500	500
coal	India	Asia	Southern Asia	Ramagundam power station	Stage IV Unit 8		Telangana TPP (Stage IV Unit 8, Stage IV Unit 9, Stage V Unit 10, Stage V Unit 11, Stage V Unit 12), Telangana super thermal power project (Stage IV Unit 8, Stage IV Unit 9, Stage V Unit 10, Stage V Unit 11, Stage V Unit 12)	800	operating	2023		supercritical	unknown					NTPC [100%]	NTPC [100.0%]	18.751	79.4722	exact	Ramagundam	Ramagundam	Karimnagar	Telangana	https://www.gem.wiki/Ramagundam_power_station	L100000102602	G100000108470	INE733E01010	1	4200		1	2063	2103	2143	0	0	0	800	800	800	800	800	800	800	800	800
coal	India	Asia	Southern Asia	Ramagundam power station	Stage IV Unit 9		Telangana TPP (Stage IV Unit 8, Stage IV Unit 9, Stage V Unit 10, Stage V Unit 11, Stage V Unit 12), Telangana super thermal power project (Stage IV Unit 8, Stage IV Unit 9, Stage V Unit 10, Stage V Unit 11, Stage V Unit 12)	800	construction	2024		supercritical	unknown					NTPC [100%]	NTPC [100.0%]	18.751	79.4722	exact	Ramagundam	Ramagundam	Karimnagar	Telangana	https://www.gem.wiki/Ramagundam_power_station	L100000102602	G100000108471	INE733E01010	1	4200	4200	0	2064	2104	2144	0	0	0	0	800	800	800	800	800	800	800	800
coal	Bangladesh	Asia	Southern Asia	Rampal power station	Unit 1		Maitree Super Thermal Power Project, Khulna Large power station, Khulna South power station	660	operating	2022		supercritical	unknown					Bangladesh India Friendship Power Company [100%]	Bangladesh Power Development Board [50.0%]; NTPC Ltd [50.0%]	22.5925	89.5564	exact	Rampal		Bagerhat	Khulna	https://www.gem.wiki/Rampal_power_station	L100000100077	G100000108473	INE733E01010	0.5	1320		2	2062	2102	2142	0	0	330	330	330	330	330	330	330	330	330	330
coal	Bangladesh	Asia	Southern Asia	Rampal power station	Unit 2		Maitree Super Thermal Power Project, Khulna Large power station, Khulna South power station	660	construction	2023		supercritical	unknown					Bangladesh India Friendship Power Company [100%]	Bangladesh Power Development Board [50.0%]; NTPC Ltd [50.0%]	22.5925	89.5564	exact	Rampal		Bagerhat	Khulna	https://www.gem.wiki/Rampal_power_station	L100000100077	G100000108474	INE733E01010	0.5	1320	1320	1	2063	2103	2143	0	0	0	330	330	330	330	330	330	330	330	330
coal	India	Asia	Southern Asia	Rihand power station	Unit 1			500	operating	1988		subcritical	bituminous					NTPC [100%]	NTPC [100.0%]	24.027	82.7915	exact	Rihandnagar	Dudhi	Sonbhadra	Uttar Pradesh	https://www.gem.wiki/Rihand_power_station	L100000102649	G100000108573	INE733E01010	1	3000		36	2028	2068	2108	500	500	500	500	500	500	500	500	500	500	500	500
coal	India	Asia	Southern Asia	Rihand power station	Unit 2			500	operating	1989		subcritical	bituminous					NTPC [100%]	NTPC [100.0%]	24.027	82.7915	exact	Rihandnagar	Dudhi	Sonbhadra	Uttar Pradesh	https://www.gem.wiki/Rihand_power_station	L100000102649	G100000108574	INE733E01010	1	3000		35	2029	2069	2109	500	500	500	500	500	500	500	500	500	500	500	500
coal	India	Asia	Southern Asia	Rihand power station	Unit 3			500	operating	2005		subcritical	bituminous					NTPC [100%]	NTPC [100.0%]	24.027	82.7915	exact	Rihandnagar	Dudhi	Sonbhadra	Uttar Pradesh	https://www.gem.wiki/Rihand_power_station	L100000102649	G100000108575	INE733E01010	1	3000		19	2045	2085	2125	500	500	500	500	500	500	500	500	500	500	500	500
coal	India	Asia	Southern Asia	Rihand power station	Unit 4			500	operating	2005		subcritical	bituminous					NTPC [100%]	NTPC [100.0%]	24.027	82.7915	exact	Rihandnagar	Dudhi	Sonbhadra	Uttar Pradesh	https://www.gem.wiki/Rihand_power_station	L100000102649	G100000108576	INE733E01010	1	3000		19	2045	2085	2125	500	500	500	500	500	500	500	500	500	500	500	500
coal	India	Asia	Southern Asia	Rihand power station	Unit 5			500	operating	2012		subcritical	bituminous					NTPC [100%]	NTPC [100.0%]	24.027	82.7915	exact	Rihandnegar	Dudhi	Sonebhadra	Uttar Pradesh	https://www.gem.wiki/Rihand_power_station	L100000102649	G100000108577	INE733E01010	1	3000		12	2052	2092	2132	500	500	500	500	500	500	500	500	500	500	500	500
coal	India	Asia	Southern Asia	Rihand power station	Unit 6			500	operating	2013		subcritical	bituminous					NTPC [100%]	NTPC [100.0%]	24.027	82.7915	exact	Rihandnegar	Dudhi	Sonebhadra	Uttar Pradesh	https://www.gem.wiki/Rihand_power_station	L100000102649	G100000108578	INE733E01010	1	3000	3000	11	2053	2093	2133	500	500	500	500	500	500	500	500	500	500	500	500
coal	India	Asia	Southern Asia	Rourkela Works-2 power station	Unit 1		Rourkela power station	60	operating	1987		subcritical	bituminous					NTPC-SAIL Power [100%]	NTPC Ltd [50.0%]; Steel Authority of India Ltd [50.0%]	22.221	84.8806	exact	SAIL Rourkela steel mill		Sundargarh	Odisha	https://www.gem.wiki/Rourkela_Works-2_power_station	L100000102494	G100000108643	INE733E01010	0.5	370		37	2027	2067	2107	30	30	30	30	30	30	30	30	30	30	30	30
coal	India	Asia	Southern Asia	Rourkela Works-2 power station	Unit 2		Rourkela power station	60	operating	1988		subcritical	bituminous					NTPC-SAIL Power [100%]	NTPC Ltd [50.0%]; Steel Authority of India Ltd [50.0%]	22.221	84.8806	exact	SAIL Rourkela steel mill		Sundargarh	Odisha	https://www.gem.wiki/Rourkela_Works-2_power_station	L100000102494	G100000108644	INE733E01010	0.5	370		36	2028	2068	2108	30	30	30	30	30	30	30	30	30	30	30	30
coal	India	Asia	Southern Asia	Rourkela Works-2 power station	Unit 3		Rourkela power station	250	operating	2022		subcritical	bituminous					NTPC-SAIL Power [100%]	NTPC Ltd [50.0%]; Steel Authority of India Ltd [50.0%]	22.221	84.8806	exact	SAIL Rourkela steel mill		Sundargarh	Odisha	https://www.gem.wiki/Rourkela_Works-2_power_station	L100000102494	G100000113412	INE733E01010	0.5	370	370	2	2062	2102	2142	0	0	125	125	125	125	125	125	125	125	125	125
coal	India	Asia	Southern Asia	Santaldih Thermal Power Station	Unit 5			250	operating	2007		subcritical	bituminous					NTPC [100%]	NTPC [100.0%]	23.6013	86.4666	exact	Santaldih	Ragunathpur	Purulia	West Bengal	https://www.gem.wiki/Santaldih_Thermal_Power_Station	L100000102686	G100000108812	INE733E01010	1	500		17	2047	2087	2127	250	250	250	250	250	250	250	250	250	250	250	250
coal	India	Asia	Southern Asia	Santaldih Thermal Power Station	Unit 6			250	operating	2011		subcritical	bituminous					NTPC [100%]	NTPC [100.0%]	23.6013	86.4666	exact	Santildih	Ragunathpur	Purulia	West Bengal	https://www.gem.wiki/Santaldih_Thermal_Power_Station	L100000102686	G100000108813	INE733E01010	1	500	500	13	2051	2091	2131	250	250	250	250	250	250	250	250	250	250	250	250
coal	India	Asia	Southern Asia	Simhadri power station	Unit 1			500	operating	2002		subcritical	bituminous					NTPC [100%]	NTPC [100.0%]	17.591	83.0917	exact			Visakhapatnam	Andhra Pradesh	https://www.gem.wiki/Simhadri_power_station	L100000102068	G100000109391	INE733E01010	1	2000		22	2042	2082	2122	500	500	500	500	500	500	500	500	500	500	500	500
coal	India	Asia	Southern Asia	Simhadri power station	Unit 2			500	operating	2002		subcritical	bituminous					NTPC [100%]	NTPC [100.0%]	17.591	83.0917	exact			Visakhapatnam	Andhra Pradesh	https://www.gem.wiki/Simhadri_power_station	L100000102068	G100000109392	INE733E01010	1	2000		22	2042	2082	2122	500	500	500	500	500	500	500	500	500	500	500	500
coal	India	Asia	Southern Asia	Simhadri power station	Unit 3			500	operating	2011		unknown	unknown					NTPC [100%]	NTPC [100.0%]	17.591	83.0917	exact	Vizag		Visakhapatnam	Andhra Pradesh	https://www.gem.wiki/Simhadri_power_station	L100000102068	G100000109393	INE733E01010	1	2000		13	2051	2091	2131	500	500	500	500	500	500	500	500	500	500	500	500
coal	India	Asia	Southern Asia	Simhadri power station	Unit 4			500	operating	2012		unknown	unknown					NTPC [100%]	NTPC [100.0%]	17.591	83.0917	exact	Vizag		Visakhapatnam	Andhra Pradesh	https://www.gem.wiki/Simhadri_power_station	L100000102068	G100000109394	INE733E01010	1	2000	2000	12	2052	2092	2132	500	500	500	500	500	500	500	500	500	500	500	500
coal	India	Asia	Southern Asia	Singrauli Super Thermal Power Station	Unit 1			200	operating	1982		subcritical	bituminous					NTPC [100%]	NTPC [100.0%]	24.1042	82.7064	exact	Shaktinagar	Dudhi	Sonbhadra	Uttar Pradesh	https://www.gem.wiki/Singrauli_Super_Thermal_Power_Station	L100000102652	G100000109413	INE733E01010	1	3600		42	2022	2062	2102	200	200	200	200	200	200	200	200	200	200	200	200
coal	India	Asia	Southern Asia	Singrauli Super Thermal Power Station	Unit 2			200	operating	1982		subcritical	bituminous					NTPC [100%]	NTPC [100.0%]	24.1042	82.7064	exact	Shaktinagar	Dudhi	Sonbhadra	Uttar Pradesh	https://www.gem.wiki/Singrauli_Super_Thermal_Power_Station	L100000102652	G100000109414	INE733E01010	1	3600		42	2022	2062	2102	200	200	200	200	200	200	200	200	200	200	200	200
coal	India	Asia	Southern Asia	Singrauli Super Thermal Power Station	Unit 3			200	operating	1983		subcritical	bituminous					NTPC [100%]	NTPC [100.0%]	24.1042	82.7064	exact	Shaktinagar	Dudhi	Sonbhadra	Uttar Pradesh	https://www.gem.wiki/Singrauli_Super_Thermal_Power_Station	L100000102652	G100000109415	INE733E01010	1	3600		41	2023	2063	2103	200	200	200	200	200	200	200	200	200	200	200	200
coal	India	Asia	Southern Asia	Singrauli Super Thermal Power Station	Unit 4			200	operating	1983		subcritical	bituminous					NTPC [100%]	NTPC [100.0%]	24.1042	82.7064	exact	Shaktinagar	Dudhi	Sonbhadra	Uttar Pradesh	https://www.gem.wiki/Singrauli_Super_Thermal_Power_Station	L100000102652	G100000109416	INE733E01010	1	3600		41	2023	2063	2103	200	200	200	200	200	200	200	200	200	200	200	200
coal	India	Asia	Southern Asia	Singrauli Super Thermal Power Station	Unit 5			200	operating	1984		subcritical	bituminous					NTPC [100%]	NTPC [100.0%]	24.1042	82.7064	exact	Shaktinagar	Dudhi	Sonbhadra	Uttar Pradesh	https://www.gem.wiki/Singrauli_Super_Thermal_Power_Station	L100000102652	G100000109417	INE733E01010	1	3600		40	2024	2064	2104	200	200	200	200	200	200	200	200	200	200	200	200
coal	India	Asia	Southern Asia	Singrauli Super Thermal Power Station	Unit 6			500	operating	1986		subcritical	bituminous					NTPC [100%]	NTPC [100.0%]	24.1042	82.7064	exact	Shaktinagar	Dudhi	Sonbhadra	Uttar Pradesh	https://www.gem.wiki/Singrauli_Super_Thermal_Power_Station	L100000102652	G100000109418	INE733E01010	1	3600		38	2026	2066	2106	500	500	500	500	500	500	500	500	500	500	500	500
coal	India	Asia	Southern Asia	Singrauli Super Thermal Power Station	Unit 7			500	operating	1987		subcritical	bituminous					NTPC [100%]	NTPC [100.0%]	24.1042	82.7064	exact	Shaktinagar	Dudhi	Sonbhadra	Uttar Pradesh	https://www.gem.wiki/Singrauli_Super_Thermal_Power_Station	L100000102652	G100000109419	INE733E01010	1	3600		37	2027	2067	2107	500	500	500	500	500	500	500	500	500	500	500	500
coal	India	Asia	Southern Asia	Singrauli Super Thermal Power Station	Unit 8			800	permitted			supercritical	unknown					NTPC [100%]	NTPC [100.0%]	24.1042	82.7064	exact			Sonebhadra	Uttar Pradesh	https://www.gem.wiki/Singrauli_Super_Thermal_Power_Station	L100000102652	G100000109420	INE733E01010	1	3600		-99	40	80	120	0	0	0	0	0	0	0	0	0	800	800	800
coal	India	Asia	Southern Asia	Singrauli Super Thermal Power Station	Unit 9			800	permitted			supercritical	unknown					NTPC [100%]	NTPC [100.0%]	24.1042	82.7064	exact			Sonebhadra	Uttar Pradesh	https://www.gem.wiki/Singrauli_Super_Thermal_Power_Station	L100000102652	G100000112789	INE733E01010	1	3600	3600	-99	40	80	120	0	0	0	0	0	0	0	0	0	800	800	800
coal	India	Asia	Southern Asia	Sipat power station	Unit 4		Rajiv Gandhi STPS power station	500	operating	2007		subcritical	unknown					NTPC [100%]	NTPC [100.0%]	22.1317	82.2904	exact	Sipat		Bilaspur	Chhattisgarh	https://www.gem.wiki/Sipat_power_station	L100000102185	G100000109453	INE733E01010	1	3780		17	2047	2087	2127	500	500	500	500	500	500	500	500	500	500	500	500
coal	India	Asia	Southern Asia	Sipat power station	Unit 5		Rajiv Gandhi STPS power station	500	operating	2008		subcritical	unknown					NTPC [100%]	NTPC [100.0%]	22.1317	82.2904	exact	Sipat		Bilaspur	Chhattisgarh	https://www.gem.wiki/Sipat_power_station	L100000102185	G100000109454	INE733E01010	1	3780		16	2048	2088	2128	500	500	500	500	500	500	500	500	500	500	500	500
coal	India	Asia	Southern Asia	Sipat power station	Unit 1		Rajiv Gandhi STPS power station	660	operating	2011		supercritical	unknown					NTPC [100%]	NTPC [100.0%]	22.1317	82.2904	exact	Sipat		Bilaspur	Chhattisgarh	https://www.gem.wiki/Sipat_power_station	L100000102185	G100000109450	INE733E01010	1	3780		13	2051	2091	2131	660	660	660	660	660	660	660	660	660	660	660	660
coal	India	Asia	Southern Asia	Sipat power station	Unit 2		Rajiv Gandhi STPS power station	660	operating	2011		supercritical	unknown					NTPC [100%]	NTPC [100.0%]	22.1317	82.2904	exact	Sipat		Bilaspur	Chhattisgarh	https://www.gem.wiki/Sipat_power_station	L100000102185	G100000109451	INE733E01010	1	3780		13	2051	2091	2131	660	660	660	660	660	660	660	660	660	660	660	660
coal	India	Asia	Southern Asia	Sipat power station	Unit 3		Rajiv Gandhi STPS power station	660	operating	2012		supercritical	unknown					NTPC [100%]	NTPC [100.0%]	22.1317	82.2904	exact	Sipat		Bilaspur	Chhattisgarh	https://www.gem.wiki/Sipat_power_station	L100000102185	G100000109452	INE733E01010	1	3780		12	2052	2092	2132	660	660	660	660	660	660	660	660	660	660	660	660
coal	India	Asia	Southern Asia	Sipat power station	Unit 6		Rajiv Gandhi STPS power station	800	pre-permit	2029		ultra-supercritical	unknown					NTPC [100%]	NTPC [100.0%]	22.1317	82.2904	exact	Sipat		Bilaspur	Chhattisgarh	https://www.gem.wiki/Sipat_power_station	L100000102185	G100000114226	INE733E01010	1	3780	3780	-5	2069	2109	2149	0	0	0	0	0	0	0	0	0	800	800	800
coal	India	Asia	Southern Asia	Solapur power station	Unit 1			660	operating	2017		supercritical	unknown					NTPC [100%]	NTPC [100.0%]	17.5513	75.9832	exact	Fatatewadi & Ahirwadi	South Solarpur	Solarpur	Maharashtra	https://www.gem.wiki/Solapur_power_station	L100000102431	G100000109490	INE733E01010	1	1320		7	2057	2097	2137	660	660	660	660	660	660	660	660	660	660	660	660
coal	India	Asia	Southern Asia	Solapur power station	Unit 2			660	operating	2019		supercritical	unknown					NTPC [100%]	NTPC [100.0%]	17.5513	75.9832	exact	Fatatewadi & Ahirwadi	South Solarpur	Solarpur	Maharashtra	https://www.gem.wiki/Solapur_power_station	L100000102431	G100000109491	INE733E01010	1	1320	1320	5	2059	2099	2139	660	660	660	660	660	660	660	660	660	660	660	660
coal	India	Asia	Southern Asia	Talcher Kaniha Super Thermal Power Station	Stage I Unit 1		Talcher STPS	500	operating	1995		subcritical	bituminous					NTPC [100%]	NTPC [100.0%]	21.0971	85.075	exact	Kaniha	Talcher	Angul	Odisha	https://www.gem.wiki/Talcher_Kaniha_Super_Thermal_Power_Station	L100000102502	G100000109879	INE733E01010	1	3000		29	2035	2075	2115	500	500	500	500	500	500	500	500	500	500	500	500
coal	India	Asia	Southern Asia	Talcher Kaniha Super Thermal Power Station	Stage I Unit 2		Talcher STPS	500	operating	1996		subcritical	bituminous					NTPC [100%]	NTPC [100.0%]	21.0971	85.075	exact	Kaniha	Talcher	Angul	Odisha	https://www.gem.wiki/Talcher_Kaniha_Super_Thermal_Power_Station	L100000102502	G100000109880	INE733E01010	1	3000		28	2036	2076	2116	500	500	500	500	500	500	500	500	500	500	500	500
coal	India	Asia	Southern Asia	Talcher Kaniha Super Thermal Power Station	Stage II Unit 3		Talcher STPS	500	operating	2003		subcritical	bituminous					NTPC [100%]	NTPC [100.0%]	21.0971	85.075	exact	Kaniha	Talcher	Angul	Odisha	https://www.gem.wiki/Talcher_Kaniha_Super_Thermal_Power_Station	L100000102502	G100000109881	INE733E01010	1	3000		21	2043	2083	2123	500	500	500	500	500	500	500	500	500	500	500	500
coal	India	Asia	Southern Asia	Talcher Kaniha Super Thermal Power Station	Stage II Unit 4		Talcher STPS	500	operating	2003		subcritical	bituminous					NTPC [100%]	NTPC [100.0%]	21.0971	85.075	exact	Kaniha	Talcher	Angul	Odisha	https://www.gem.wiki/Talcher_Kaniha_Super_Thermal_Power_Station	L100000102502	G100000109882	INE733E01010	1	3000		21	2043	2083	2123	500	500	500	500	500	500	500	500	500	500	500	500
coal	India	Asia	Southern Asia	Talcher Kaniha Super Thermal Power Station	Stage II Unit 5		Talcher STPS	500	operating	2005		subcritical	bituminous					NTPC [100%]	NTPC [100.0%]	21.0971	85.075	exact	Kaniha	Talcher	Angul	Odisha	https://www.gem.wiki/Talcher_Kaniha_Super_Thermal_Power_Station	L100000102502	G100000109883	INE733E01010	1	3000		19	2045	2085	2125	500	500	500	500	500	500	500	500	500	500	500	500
coal	India	Asia	Southern Asia	Talcher Kaniha Super Thermal Power Station	Stage II Unit 6		Talcher STPS	500	operating	2006		subcritical	bituminous					NTPC [100%]	NTPC [100.0%]	21.0971	85.075	exact	Kaniha	Talcher	Angul	Odisha	https://www.gem.wiki/Talcher_Kaniha_Super_Thermal_Power_Station	L100000102502	G100000109884	INE733E01010	1	3000	3000	18	2046	2086	2126	500	500	500	500	500	500	500	500	500	500	500	500
coal	India	Asia	Southern Asia	Talcher power station	Unit A1		Talcher-A power station Unit 1 (Unit A1), Talcher-A power station Unit 2 (Unit A2), Talcher-A power station Unit 3 (Unit A3), Talcher-A power station Unit 4 (Unit A4), Talcher-B power station Unit 1 (Unit B5), Talcher-B power station Unit 2 (Unit B6)	60	retired	1967	2021	subcritical	bituminous					NTPC [100%]	NTPC [100.0%]	20.9111	85.2072	exact	Digi	Talcher	Angul	Odisha	https://www.gem.wiki/Talcher_power_station	L100000102504	G100000109889	INE733E01010	1	1780		57	2007	2047	2087	60	0	0	0	0	0	0	0	0	0	0	0
coal	India	Asia	Southern Asia	Talcher power station	Unit A2		Talcher-A power station Unit 1 (Unit A1), Talcher-A power station Unit 2 (Unit A2), Talcher-A power station Unit 3 (Unit A3), Talcher-A power station Unit 4 (Unit A4), Talcher-B power station Unit 1 (Unit B5), Talcher-B power station Unit 2 (Unit B6)	60	retired	1968	2021	subcritical	bituminous					NTPC [100%]	NTPC [100.0%]	20.9111	85.2072	exact	Digi	Talcher	Angul	Odisha	https://www.gem.wiki/Talcher_power_station	L100000102504	G100000109890	INE733E01010	1	1780		56	2008	2048	2088	60	0	0	0	0	0	0	0	0	0	0	0
coal	India	Asia	Southern Asia	Talcher power station	Unit A3		Talcher-A power station Unit 1 (Unit A1), Talcher-A power station Unit 2 (Unit A2), Talcher-A power station Unit 3 (Unit A3), Talcher-A power station Unit 4 (Unit A4), Talcher-B power station Unit 1 (Unit B5), Talcher-B power station Unit 2 (Unit B6)	60	retired	1968	2021	subcritical	bituminous					NTPC [100%]	NTPC [100.0%]	20.9111	85.2072	exact	Digi	Talcher	Angul	Odisha	https://www.gem.wiki/Talcher_power_station	L100000102504	G100000109891	INE733E01010	1	1780		56	2008	2048	2088	60	0	0	0	0	0	0	0	0	0	0	0
coal	India	Asia	Southern Asia	Talcher power station	Unit A4		Talcher-A power station Unit 1 (Unit A1), Talcher-A power station Unit 2 (Unit A2), Talcher-A power station Unit 3 (Unit A3), Talcher-A power station Unit 4 (Unit A4), Talcher-B power station Unit 1 (Unit B5), Talcher-B power station Unit 2 (Unit B6)	60	retired	1969	2021	subcritical	bituminous					NTPC [100%]	NTPC [100.0%]	20.9111	85.2072	exact	Digi	Talcher	Angul	Odisha	https://www.gem.wiki/Talcher_power_station	L100000102504	G100000109892	INE733E01010	1	1780		55	2009	2049	2089	60	0	0	0	0	0	0	0	0	0	0	0
coal	India	Asia	Southern Asia	Talcher power station	Unit B5		Talcher-A power station Unit 1 (Unit A1), Talcher-A power station Unit 2 (Unit A2), Talcher-A power station Unit 3 (Unit A3), Talcher-A power station Unit 4 (Unit A4), Talcher-B power station Unit 1 (Unit B5), Talcher-B power station Unit 2 (Unit B6)	110	retired	1982	2021	subcritical	bituminous					NTPC [100%]	NTPC [100.0%]	20.9111	85.2072	exact	Digi	Talcher	Angul	Odisha	https://www.gem.wiki/Talcher_power_station	L100000102504	G100000109893	INE733E01010	1	1780		42	2022	2062	2102	110	0	0	0	0	0	0	0	0	0	0	0
coal	India	Asia	Southern Asia	Talcher power station	Unit B6		Talcher-A power station Unit 1 (Unit A1), Talcher-A power station Unit 2 (Unit A2), Talcher-A power station Unit 3 (Unit A3), Talcher-A power station Unit 4 (Unit A4), Talcher-B power station Unit 1 (Unit B5), Talcher-B power station Unit 2 (Unit B6)	110	retired	1983	2021	subcritical	bituminous					NTPC [100%]	NTPC [100.0%]	20.9111	85.2072	exact	Digi	Talcher	Angul	Odisha	https://www.gem.wiki/Talcher_power_station	L100000102504	G100000109894	INE733E01010	1	1780		41	2023	2063	2103	110	0	0	0	0	0	0	0	0	0	0	0
coal	India	Asia	Southern Asia	Talcher power station	Stage III Unit 1		Talcher-A power station Unit 1 (Unit A1), Talcher-A power station Unit 2 (Unit A2), Talcher-A power station Unit 3 (Unit A3), Talcher-A power station Unit 4 (Unit A4), Talcher-B power station Unit 1 (Unit B5), Talcher-B power station Unit 2 (Unit B6)	660	construction	2026		ultra-supercritical	bituminous					NTPC [100%]	NTPC [100.0%]	20.9111	85.2072	exact	Kaniha		Angul	Odisha	https://www.gem.wiki/Talcher_power_station	L100000102504	G100000109887	INE733E01010	1	1780		-2	2066	2106	2146	0	0	0	0	0	0	660	660	660	660	660	660
coal	India	Asia	Southern Asia	Talcher power station	Stage III Unit 2		Talcher-A power station Unit 1 (Unit A1), Talcher-A power station Unit 2 (Unit A2), Talcher-A power station Unit 3 (Unit A3), Talcher-A power station Unit 4 (Unit A4), Talcher-B power station Unit 1 (Unit B5), Talcher-B power station Unit 2 (Unit B6)	660	construction	2027		ultra-supercritical	bituminous					NTPC [100%]	NTPC [100.0%]	20.9111	85.2072	exact	Kaniha		Angul	Odisha	https://www.gem.wiki/Talcher_power_station	L100000102504	G100000109888	INE733E01010	1	1780	1780	-3	2067	2107	2147	0	0	0	0	0	0	0	660	660	660	660	660
coal	India	Asia	Southern Asia	Tanda power station	Unit 1			110	operating	1988		subcritical	bituminous					NTPC [100%]	NTPC [100.0%]	26.5895	82.6012	exact	Bahadurgarh	Tanda	Ambedkarnagar	Uttar Pradesh	https://www.gem.wiki/Tanda_power_station	L100000102653	G100000109926	INE733E01010	1	1760		36	2028	2068	2108	110	110	110	110	110	110	110	110	110	110	110	110
coal	India	Asia	Southern Asia	Tanda power station	Unit 2			110	operating	1989		subcritical	bituminous					NTPC [100%]	NTPC [100.0%]	26.5895	82.6012	exact	Bahadurgarh	Tanda	Ambedkarnagar	Uttar Pradesh	https://www.gem.wiki/Tanda_power_station	L100000102653	G100000109927	INE733E01010	1	1760		35	2029	2069	2109	110	110	110	110	110	110	110	110	110	110	110	110
coal	India	Asia	Southern Asia	Tanda power station	Unit 3			110	operating	1990		subcritical	bituminous					NTPC [100%]	NTPC [100.0%]	26.5895	82.6012	exact	Bahadurgarh	Tanda	Ambedkarnagar	Uttar Pradesh	https://www.gem.wiki/Tanda_power_station	L100000102653	G100000109928	INE733E01010	1	1760		34	2030	2070	2110	110	110	110	110	110	110	110	110	110	110	110	110
coal	India	Asia	Southern Asia	Tanda power station	Unit 4			110	operating	1998		subcritical	bituminous					NTPC [100%]	NTPC [100.0%]	26.5895	82.6012	exact	Bahadurgarh	Tanda	Ambedkarnagar	Uttar Pradesh	https://www.gem.wiki/Tanda_power_station	L100000102653	G100000109929	INE733E01010	1	1760		26	2038	2078	2118	110	110	110	110	110	110	110	110	110	110	110	110
coal	India	Asia	Southern Asia	Tanda power station	Unit 5			660	operating	2019		supercritical	unknown					NTPC [100%]	NTPC [100.0%]	26.5892	82.6004	exact	Bahadurgarh	Tanda	Ambedkarnagar	Uttar Pradesh	https://www.gem.wiki/Tanda_power_station	L100000102653	G100000109924	INE733E01010	1	1760		5	2059	2099	2139	660	660	660	660	660	660	660	660	660	660	660	660
coal	India	Asia	Southern Asia	Tanda power station	Unit 6			660	operating	2021		supercritical	unknown					NTPC [100%]	NTPC [100.0%]	26.5892	82.6004	exact	Bahadurgarh	Tanda	Ambedkarnagar	Uttar Pradesh	https://www.gem.wiki/Tanda_power_station	L100000102653	G100000109925	INE733E01010	1	1760	1760	3	2061	2101	2141	0	660	660	660	660	660	660	660	660	660	660	660
coal	India	Asia	Southern Asia	Vallur Thermal Power Plant	Unit 1			500	operating	2012		subcritical	unknown					NTPC Tamil Nadu Energy [100%]	NTPC Ltd [50.0%]; TNEB Ltd	13.2371	80.3018	exact	Vallur	Ponneri	Thiruvallur	Tamil Nadu	https://www.gem.wiki/Vallur_Thermal_Power_Plant	L100000102590	G100000110544	INE733E01010	0.5	1500		12	2052	2092	2132	250	250	250	250	250	250	250	250	250	250	250	250
coal	India	Asia	Southern Asia	Vallur Thermal Power Plant	Unit 2			500	operating	2013		subcritical	unknown					NTPC Tamil Nadu Energy [100%]	NTPC Ltd [50.0%]; TNEB Ltd	13.2371	80.3018	exact	Vallur	Ponneri	Thiruvallur	Tamil Nadu	https://www.gem.wiki/Vallur_Thermal_Power_Plant	L100000102590	G100000110545	INE733E01010	0.5	1500		11	2053	2093	2133	250	250	250	250	250	250	250	250	250	250	250	250
coal	India	Asia	Southern Asia	Vallur Thermal Power Plant	Unit 3			500	operating	2014		subcritical	unknown					NTPC Tamil Nadu Energy [100%]	NTPC Ltd [50.0%]; TNEB Ltd	13.2371	80.3018	exact	Vallur	Ponneri	Thiruvallur	Tamil Nadu	https://www.gem.wiki/Vallur_Thermal_Power_Plant	L100000102590	G100000110546	INE733E01010	0.5	1500	1500	10	2054	2094	2134	250	250	250	250	250	250	250	250	250	250	250	250
coal	India	Asia	Southern Asia	Vindhyachal power station	Phase 1 Unit 1			210	operating	1987		subcritical	bituminous					NTPC [100%]	NTPC [100.0%]	24.0983	82.6719	exact	Waidhan	Singrauli	Singrauli	Madhya Pradesh	https://www.gem.wiki/Vindhyachal_power_station	L100000102371	G100000110598	INE733E01010	1	4760		37	2027	2067	2107	210	210	210	210	210	210	210	210	210	210	210	210
coal	India	Asia	Southern Asia	Vindhyachal power station	Phase 1 Unit 2			210	operating	1988		subcritical	bituminous					NTPC [100%]	NTPC [100.0%]	24.0983	82.6719	exact	Waidhan	Singrauli	Singrauli	Madhya Pradesh	https://www.gem.wiki/Vindhyachal_power_station	L100000102371	G100000110599	INE733E01010	1	4760		36	2028	2068	2108	210	210	210	210	210	210	210	210	210	210	210	210
coal	India	Asia	Southern Asia	Vindhyachal power station	Phase 1 Unit 3			210	operating	1989		subcritical	bituminous					NTPC [100%]	NTPC [100.0%]	24.0983	82.6719	exact	Waidhan	Singrauli	Singrauli	Madhya Pradesh	https://www.gem.wiki/Vindhyachal_power_station	L100000102371	G100000110600	INE733E01010	1	4760		35	2029	2069	2109	210	210	210	210	210	210	210	210	210	210	210	210
coal	India	Asia	Southern Asia	Vindhyachal power station	Phase 1 Unit 4			210	operating	1989		subcritical	bituminous					NTPC [100%]	NTPC [100.0%]	24.0983	82.6719	exact	Waidhan	Singrauli	Singrauli	Madhya Pradesh	https://www.gem.wiki/Vindhyachal_power_station	L100000102371	G100000110601	INE733E01010	1	4760		35	2029	2069	2109	210	210	210	210	210	210	210	210	210	210	210	210
coal	India	Asia	Southern Asia	Vindhyachal power station	Phase 1 Unit 5			210	operating	1990		subcritical	bituminous					NTPC [100%]	NTPC [100.0%]	24.0983	82.6719	exact	Waidhan	Singrauli	Singrauli	Madhya Pradesh	https://www.gem.wiki/Vindhyachal_power_station	L100000102371	G100000110602	INE733E01010	1	4760		34	2030	2070	2110	210	210	210	210	210	210	210	210	210	210	210	210
coal	India	Asia	Southern Asia	Vindhyachal power station	Phase 1 Unit 6			210	operating	1991		subcritical	bituminous					NTPC [100%]	NTPC [100.0%]	24.0983	82.6719	exact	Waidhan	Singrauli	Singrauli	Madhya Pradesh	https://www.gem.wiki/Vindhyachal_power_station	L100000102371	G100000110603	INE733E01010	1	4760		33	2031	2071	2111	210	210	210	210	210	210	210	210	210	210	210	210
coal	India	Asia	Southern Asia	Vindhyachal power station	Phase 2 Unit 1			500	operating	1999		subcritical	bituminous					NTPC [100%]	NTPC [100.0%]	24.0983	82.6719	exact	Waidhan	Singrauli	Singrauli	Madhya Pradesh	https://www.gem.wiki/Vindhyachal_power_station	L100000102371	G100000110604	INE733E01010	1	4760		25	2039	2079	2119	500	500	500	500	500	500	500	500	500	500	500	500
coal	India	Asia	Southern Asia	Vindhyachal power station	Phase 2 Unit 2			500	operating	2000		subcritical	bituminous					NTPC [100%]	NTPC [100.0%]	24.0983	82.6719	exact	Waidhan	Singrauli	Singrauli	Madhya Pradesh	https://www.gem.wiki/Vindhyachal_power_station	L100000102371	G100000110605	INE733E01010	1	4760		24	2040	2080	2120	500	500	500	500	500	500	500	500	500	500	500	500
coal	India	Asia	Southern Asia	Vindhyachal power station	Phase 3 Unit 1			500	operating	2006		subcritical	bituminous					NTPC [100%]	NTPC [100.0%]	24.0983	82.6719	exact	Waidhan	Singrauli	Singrauli	Madhya Pradesh	https://www.gem.wiki/Vindhyachal_power_station	L100000102371	G100000110606	INE733E01010	1	4760		18	2046	2086	2126	500	500	500	500	500	500	500	500	500	500	500	500
coal	India	Asia	Southern Asia	Vindhyachal power station	Phase 3 Unit 2			500	operating	2007		subcritical	bituminous					NTPC [100%]	NTPC [100.0%]	24.0983	82.6719	exact	Waidhan	Singrauli	Singrauli	Madhya Pradesh	https://www.gem.wiki/Vindhyachal_power_station	L100000102371	G100000110607	INE733E01010	1	4760		17	2047	2087	2127	500	500	500	500	500	500	500	500	500	500	500	500
coal	India	Asia	Southern Asia	Vindhyachal power station	Phase IV unit 11			500	operating	2012		subcritical	bituminous					NTPC [100%]	NTPC [100.0%]	24.0983	82.6719	exact	Waidhan	Waidhan	Singrauli	Madhya Pradesh	https://www.gem.wiki/Vindhyachal_power_station	L100000102371	G100000110608	INE733E01010	1	4760		12	2052	2092	2132	500	500	500	500	500	500	500	500	500	500	500	500
coal	India	Asia	Southern Asia	Vindhyachal power station	Phase IV units 12			500	operating	2013		subcritical	bituminous					NTPC [100%]	NTPC [100.0%]	24.0983	82.6719	exact	Waidhan	Waidhan	Singrauli	Madhya Pradesh	https://www.gem.wiki/Vindhyachal_power_station	L100000102371	G100000110609	INE733E01010	1	4760		11	2053	2093	2133	500	500	500	500	500	500	500	500	500	500	500	500
coal	India	Asia	Southern Asia	Vindhyachal power station	Phase V Unit 13			500	operating	2015		subcritical	bituminous					NTPC [100%]	NTPC [100.0%]	24.0983	82.6719	exact	Waidhan	Waidhan	Singrauli	Madhya Pradesh	https://www.gem.wiki/Vindhyachal_power_station	L100000102371	G100000110610	INE733E01010	1	4760	4760	9	2055	2095	2135	500	500	500	500	500	500	500	500	500	500	500	500
oil/gas	India	Asia	Southern Asia	Anta power plant	1-4		Anta Thermal power station	419.33	operating	1989		CC	NG					NTPC Ltd [100.0%]	NTPC Ltd [100.0%]	25.1797	76.3188	exact	Anta			Rajasthan	https://www.gem.wiki/Anta_power_plant	L100000401464	G100000401434	INE733E01010	1	419.33	419.33	35	2029	2069	2109	419.33	419.33	419.33	419.33	419.33	419.33	419.33	419.33	419.33	419.33	419.33	419.33
oil/gas	India	Asia	Southern Asia	Auraiya Combined Cycle power plant	1-6			663	operating	1990		CC	NG					NTPC Ltd [100.0%]	NTPC Ltd [100.0%]	26.6282	79.5286	exact	Auraiya			Uttar Pradesh	https://www.gem.wiki/Auraiya_Combined_Cycle_power_plant	L100000401466	G100000401436	INE733E01010	1	663	663	34	2030	2070	2110	663	663	663	663	663	663	663	663	663	663	663	663
oil/gas	India	Asia	Southern Asia	Dadri Combined Cycle power plant	1-6			829.78	operating	1994		CC	NG/D					NTPC Ltd [100.0%]	NTPC Ltd [100.0%]	28.5932	77.6101	exact	Gautam Budh Nagar			Uttar Pradesh	https://www.gem.wiki/Dadri_Combined_Cycle_power_plant	L100000401465	G100000401435	INE733E01010	1	829.78	829.78	30	2034	2074	2114	829.78	829.78	829.78	829.78	829.78	829.78	829.78	829.78	829.78	829.78	829.78	829.78
oil/gas	India	Asia	Southern Asia	Faridabad Combined Cycle power plant	1-3			431.59	operating	2000		CC	NG/N/D					NTPC Ltd [100.0%]	NTPC Ltd [100.0%]	28.3465	77.359	exact	Faridabad District			Haryana	https://www.gem.wiki/Faridabad_Combined_Cycle_power_plant	L100000401463	G100000401433	INE733E01010	1	431.59	431.59	24	2040	2080	2120	431.59	431.59	431.59	431.59	431.59	431.59	431.59	431.59	431.59	431.59	431.59	431.59
oil/gas	India	Asia	Southern Asia	Hope Town power station	1			50	announced			not found	LNG/D					NTPC Ltd [100.0%]	NTPC Ltd [100.0%]	11.7061	92.7368	approximate	Ferrargunj Tehsil		South Andaman district	Andaman & Nicobar Is	https://www.gem.wiki/Hope_Town_power_station	L100000408394	G100000411776	INE733E01010	1	50	50	-99	40	80	120	0	0	0	0	0	0	0	0	0	50	50	50
oil/gas	India	Asia	Southern Asia	Jhanor Gandhar Combined Cycle power plant	1-4			657	operating	1995		CC	NG					NTPC Ltd [100.0%]	NTPC Ltd [100.0%]	21.8242	73.1136	exact	Bharuch			Gujarat	https://www.gem.wiki/Jhanor_Gandhar_Combined_Cycle_power_plant	L100000401489	G100000401459	INE733E01010	1	657	657	29	2035	2075	2115	657	657	657	657	657	657	657	657	657	657	657	657
oil/gas	India	Asia	Southern Asia	Kawas Combined Cycle power plant	1-6			656	operating	1993		CC	NG					NTPC Ltd [100.0%]	NTPC Ltd [100.0%]	21.175	72.6879	exact	Surat			Gujarat	https://www.gem.wiki/Kawas_Combined_Cycle_power_plant	L100000401490	G100000401460	INE733E01010	1	656	656	31	2033	2073	2113	656	656	656	656	656	656	656	656	656	656	656	656
oil/gas	India	Asia	Southern Asia	Kayamkulam Gas power plant	1		Rajiv Gandhi CCPP	350	operating	1999		CC	NG/N					NTPC Ltd [100.0%]	NTPC Ltd [100.0%]	9.2072	76.4342	approximate	Kayamkulam - Alappuzha Dist			Kerala	https://www.gem.wiki/Kayamkulam_Gas_power_plant	L100000407598	G100000409915	INE733E01010	1	350	350	25	2039	2079	2119	350	350	350	350	350	350	350	350	350	350	350	350
hydropower	India	Asia	Southern Asia	Koldam hydroelectric plant				800	operating	2015		conventional storage				TRUE	FALSE	NTPC LTD		31.3822	76.8765	exact		Sundarnagar	Mandi	Himachal Pradesh	https://gem.wiki/Koldam_hydroelectric_plant	L601917	G601937	INE733E01010	1	800	800	9	2055	2095	2135	800	800	800	800	800	800	800	800	800	800	800	800
hydropower	India	Asia	Southern Asia	Lata Tapovan hydroelectric plant				171	mothballed			run-of-river				TRUE	FALSE	NTPC LTD		30.0798	78.3046	approximate			Chamoli district	Uttarakhand	https://gem.wiki/Lata_Tapovan_hydroelectric_plant	L601940	G604545	INE733E01010	1	171	171	-99	40	80	120	0	0	0	0	0	0	0	0	0	0	0	0
hydropower	India	Asia	Southern Asia	Miyar hydroelectric plant				120	shelved			run-of-river				TRUE	FALSE	NTPC LTD		31.8168	77.3493	approximate			Lahaul and Spiti district	Himachal Pradesh	https://gem.wiki/Miyar_hydroelectric_plant	L601966	G601986	INE733E01010	1	120		-99	40	80	120	0	0	0	0	0	0	0	0	0	0	0	0
hydropower	India	Asia	Southern Asia	Rammam-III hydroelectric plant				120	construction			run-of-river				TRUE	FALSE	NTPC LTD		27.1236	88.2222	exact	Darjeeling	Darjeeling Pulbazar	Darjeeling district	West Bengal	https://gem.wiki/Rammam-III_hydroelectric_plant	L602007	G602027	INE733E01010	1	120	120	-99	40	80	120	0	0	0	0	0	0	0	120	120	120	120	120
hydropower	India	Asia	Southern Asia	Seli hydroelectric plant				400	shelved			run-of-river				TRUE	FALSE	NTPC LTD		31.8168	77.3493	approximate			Lahaul and Spiti district	Himachal Pradesh	https://gem.wiki/Seli_hydroelectric_plant	L602029	G602049	INE733E01010	1	400	400	-99	40	80	120	0	0	0	0	0	0	0	0	0	0	0	0
hydropower	India	Asia	Southern Asia	Tapovan Vishnugad hydroelectric plant				520	construction	2024		run-of-river				TRUE	FALSE	NTPC LTD		30.5355	79.5195	exact		Joshimath Tehsil	Chamoli district	Uttarakhand	https://gem.wiki/Tapovan_Vishnugad_hydroelectric_plant	L602054	G602075	INE733E01010	1	520	520	0	2064	2104	2144	0	0	0	0	520	520	520	520	520	520	520	520
solar	India	Asia	Southern Asia	Amreshwar solar farm				200	pre-construction			PV						NTPC LTD		22.5415	73.4334	approximate		Amreshwar		Gujarat	https://gem.wiki/Amreshwar_solar_farm	L800586	G800698	INE733E01010	1	200	200	-99	40	80	120	0	0	0	0	0	0	0	0	0	0	0	0
solar	India	Asia	Southern Asia	Ananthapuram solar farm			Np Kunta Umspp	250	operating	2016		PV						NTPC LTD		13.1673	79.2128	approximate		Ananthapuram		Andhra Pradesh	https://gem.wiki/Ananthapuram_solar_farm	L800587	G800699	INE733E01010	1	250	250	8	2056	2096	2136	250	250	250	250	250	250	250	250	250	250	250	250
solar	India	Asia	Southern Asia	Anta solar farm			Anta Solar	90	pre-construction			PV						NTPC LTD		25.7717	71.0931	approximate		Anta	Baran	Rajasthan	https://gem.wiki/Anta_solar_farm	L800588	G800700	INE733E01010	1	90	90	-99	40	80	120	0	0	0	0	0	0	0	0	0	0	0	0
solar	India	Asia	Southern Asia	Auraiya I solar farm				20	operating	2022		PV						NTPC LTD		26.632	79.533	exact		Auraiya		Uttar Pradesh	https://gem.wiki/Auraiya_I_solar_farm	L800589	G800701	INE733E01010	1	20		2	2062	2102	2142	0	0	20	20	20	20	20	20	20	20	20	20
solar	India	Asia	Southern Asia	Auraiya II solar farm			Auraiya floating solar farm	20	operating	2022		PV						NTPC LTD		26.634	79.5279	exact		Auraiya		Uttar Pradesh	https://gem.wiki/Auraiya_II_solar_farm	L800590	G800702	INE733E01010	1	20	20	2	2062	2102	2142	0	0	20	20	20	20	20	20	20	20	20	20
solar	India	Asia	Southern Asia	Bhadla (NTPC) solar farm				625	pre-construction			PV						NTPC LTD		27.5182	71.9306	approximate		Bhadla	Jodhpur	Rajasthan	https://gem.wiki/Bhadla_(NTPC)_solar_farm	L829495	G833285	INE733E01010	1	625	625	-99	40	80	120	0	0	0	0	0	0	0	0	0	0	0	0
solar	India	Asia	Southern Asia	Bhadla (NTPC) Solar Park				260	operating	2017		PV						NTPC LTD		27.488	71.981	exact	Bhadla		Jodhpur	Rajasthan	https://gem.wiki/Bhadla_(NTPC)_Solar_Park	L800591	G800703	INE733E01010	1	260	260	7	2057	2097	2137	260	260	260	260	260	260	260	260	260	260	260	260
solar	India	Asia	Southern Asia	Bhensada solar farm			JFPc} NTPC Tata	320	pre-construction			PV						NTPC LTD		25.1862	75.8589	approximate		Bhensada		Rajasthan	https://gem.wiki/Bhensada_solar_farm	L800592	G800704	INE733E01010	1	320	320	-99	40	80	120	0	0	0	0	0	0	0	0	0	0	0	0
solar	India	Asia	Southern Asia	Bilhaur solar farm				225	operating	2021		PV						NTPC LTD		26.756	80.072	exact		Bilhaur		Uttar Pradesh	https://gem.wiki/Bilhaur_solar_farm	L800593	G800705	INE733E01010	1	225	225	3	2061	2101	2141	0	225	225	225	225	225	225	225	225	225	225	225
solar	India	Asia	Southern Asia	Chhattargarh solar farm				150	pre-construction			PV						NTPC LTD		25.1862	75.8589	approximate		Chhattargarh		Rajasthan	https://gem.wiki/Chhattargarh_solar_farm	L800594	G800706	INE733E01010	1	150	150	-99	40	80	120	0	0	0	0	0	0	0	0	0	0	0	0
solar	Cuba	Americas	Latin America and the Caribbean	Cumbre (NTPC) solar farm		Parque Solar Cumbre (NTPC)		25	pre-construction			PV						Union Electrica de Cuba [50%]; NTPC Renewable Energy LTD [50%]		22.3115	-79.6668	approximate				Villa Clara	https://gem.wiki/Cumbre_(NTPC)_solar_farm	L832414	G837966	INE733E01010	0.5	25	25	-99	40	80	120	0	0	0	0	0	0	0	0	0	0	0	0
solar	India	Asia	Southern Asia	Devikot solar farm			JFPc} NTPC Hild	240	operating	2022		PV						NTPC LTD		26.6849	71.2351	approximate		Devikot		Rajasthan	https://gem.wiki/Devikot_solar_farm	L800595	G800707	INE733E01010	1	240	240	2	2062	2102	2142	0	0	240	240	240	240	240	240	240	240	240	240
solar	India	Asia	Southern Asia	Ettayapuram solar farm				230	operating	2022		PV						NTPC LTD		9.1806	78.0231	approximate		Ettayapuram		Tamil Nadu	https://gem.wiki/Ettayapuram_solar_farm	L800758	G800881	INE733E01010	1	230	230	2	2062	2102	2142	0	0	230	230	230	230	230	230	230	230	230	230
solar	India	Asia	Southern Asia	Fatehgarh solar farm	1			50	operating	2022		PV						NTPC LTD		25.5377	75.3612	approximate		Fatehgarh	Jaisalmer	Rajasthan	https://gem.wiki/Fatehgarh_solar_farm	L808861	G811154	INE733E01010	1	296		2	2062	2102	2142	0	0	50	50	50	50	50	50	50	50	50	50
solar	India	Asia	Southern Asia	Fatehgarh solar farm	2			246	operating	2022		PV						NTPC LTD		25.5377	75.3612	approximate		Fatehgarh	Jaisalmer	Rajasthan	https://gem.wiki/Fatehgarh_solar_farm	L808861	G811155	INE733E01010	1	296	296	2	2062	2102	2142	0	0	246	246	246	246	246	246	246	246	246	246
solar	India	Asia	Southern Asia	Gujarat GUVNL XI (NTPC) solar farm				200	pre-construction			PV						NTPC LTD		22.3376	71.7211	approximate				Gujarat	https://gem.wiki/Gujarat_GUVNL_XI_(NTPC)_solar_farm	L808867	G811161	INE733E01010	1	200	200	-99	40	80	120	0	0	0	0	0	0	0	0	0	0	0	0
solar	India	Asia	Southern Asia	Jetsar solar farm			Jetsar Solar	160	operating	2022		PV						NTPC LTD		9.0128	76.9144	approximate		Jetsar		Rajasthan	https://gem.wiki/Jetsar_solar_farm	L800598	G800710	INE733E01010	1	160	160	2	2062	2102	2142	0	0	160	160	160	160	160	160	160	160	160	160
solar	India	Asia	Southern Asia	Jhanor Gandhar solar farm			Gandhar Solar PV farm	20	operating	2022		PV						NTPC LTD		21.8243	73.1137	approximate		Jhanor Gandhar		Gujarat	https://gem.wiki/Jhanor_Gandhar_solar_farm	L800599	G800711	INE733E01010	1	20	20	2	2062	2102	2142	0	0	20	20	20	20	20	20	20	20	20	20
solar	India	Asia	Southern Asia	Kawas solar farm			Kawas Solar	56	operating			PV						NTPC LTD		21.175	72.684	exact		Kawas		Gujarat	https://gem.wiki/Kawas_solar_farm	L800600	G800712	INE733E01010	1	56	56	-99	40	80	120	56	56	56	56	56	56	56	56	56	56	56	56
solar	India	Asia	Southern Asia	Kayamkulam solar farm			Kayamkulam Floating	102	operating	2022		PV						NTPC LTD		9.1697	76.501	approximate		Kayamkulam		Kerala	https://gem.wiki/Kayamkulam_solar_farm	L800601	G800713	INE733E01010	1	102	102	2	2062	2102	2142	0	0	102	102	102	102	102	102	102	102	102	102
solar	India	Asia	Southern Asia	Kutch (NTPC) Solar Park				4750	pre-construction			Assumed PV						NTPC LTD		23.8245	69.7298	approximate	Khavada		Kutch	Gujarat	https://gem.wiki/Kutch_(NTPC)_Solar_Park	L800602	G800714	INE733E01010	1	4750	4750	-99	40	80	120	0	0	0	0	0	0	0	0	0	0	0	0
solar	Cuba	Americas	Latin America and the Caribbean	La Distancia (NTPC) solar farm		Parque Soalr La Distancia (NTPC)		10	pre-construction			PV						Union Electrica de Cuba [50%]; NTPC Renewable Energy LTD [50%]		22.6407	-80.046	approximate				Villa Clara	https://gem.wiki/La_Distancia_(NTPC)_solar_farm	L832415	G837967	INE733E01010	0.5	10	10	-99	40	80	120	0	0	0	0	0	0	0	0	0	0	0	0
solar	Cuba	Americas	Latin America and the Caribbean	La Paloma (NTPC) solar farm		Parque Solar La Paloma (NTPC)		5	pre-construction			PV						Union Electrica de Cuba [50%]; NTPC Renewable Energy LTD [50%]		22.9846	-80.5867	approximate				Villa Clara	https://gem.wiki/La_Paloma_(NTPC)_solar_farm	L832416	G837968	INE733E01010	0.5	5	5	-99	40	80	120	0	0	0	0	0	0	0	0	0	0	0	0
solar	Cuba	Americas	Latin America and the Caribbean	Macún (NTPC) solar farm		Parque Solar Macún (NTPC)		10	pre-construction			PV						Union Electrica de Cuba [50%]; NTPC Renewable Energy LTD [50%]		22.7987	-80.0776	approximate	Sagua La Grande			Villa Clara	https://gem.wiki/Macún_(NTPC)_solar_farm	L832418	G837970	INE733E01010	0.5	10	10	-99	40	80	120	0	0	0	0	0	0	0	0	0	0	0	0
solar	India	Asia	Southern Asia	Mandsaur (NTPC) solar farm				250	operating	2017		PV						NTPC LTD		24.088	75.799	exact		Mandsaur		Madhya Pradesh	https://gem.wiki/Mandsaur_(NTPC)_solar_farm	L800603	G800715	INE733E01010	1	250	250	7	2057	2097	2137	250	250	250	250	250	250	250	250	250	250	250	250
solar	Cuba	Americas	Latin America and the Caribbean	Minidustria 2 (NTPC) solar farm		Parque Solar Minidustria 2 (NTPC)		5	pre-construction			PV						Union Electrica de Cuba [50%]; NTPC Renewable Energy LTD [50%]		22.435	-79.9326	approximate	Santa Clara			Villa Clara	https://gem.wiki/Minidustria_2_(NTPC)_solar_farm	L832419	G837971	INE733E01010	0.5	5	5	-99	40	80	120	0	0	0	0	0	0	0	0	0	0	0	0
solar	Niger	Africa	Sub-Saharan Africa	Niger (NTPC) solar farm				50	announced			Assumed PV						NTPC LTD		16.808	9.9986	approximate		Tchirozérine			https://gem.wiki/Niger_(NTPC)_solar_farm	L827703	G831249	INE733E01010	1	50	50	-99	40	80	120	0	0	0	0	0	0	0	0	0	0	0	0
solar	India	Asia	Southern Asia	Nokhra solar farm			Nokh Solar Park	300	operating	2022		PV						NTPC LTD		27.636	72.689	exact		Nokhra		Rajasthan	https://gem.wiki/Nokhra_solar_farm	L800604	G800716	INE733E01010	1	300	300	2	2062	2102	2142	0	0	300	300	300	300	300	300	300	300	300	300
solar	India	Asia	Southern Asia	Omkareshwar Floating Solar Park	2A			100	pre-construction			PV						NTPC LTD		23.8143	77.5341	approximate	Mandhata		Khnadwa	Madhya Pradesh	https://gem.wiki/Omkareshwar_Floating_Solar_Park	L800686	G800800	INE733E01010	1	100	100	-99	40	80	120	0	0	0	0	0	0	0	0	0	0	0	0
solar	India	Asia	Southern Asia	Panchet Dam floating solar farm	1			75	announced			PV						NTPC Renewable Energy		23.6802	86.7459	approximate		Nirsa-Cum-Chirkunda	Dhanbad District	Jharkhand	https://gem.wiki/Panchet_Dam_floating_solar_farm	L830012	G833851	INE733E01010	1	155		-99	40	80	120	0	0	0	0	0	0	0	0	0	0	0	0
solar	India	Asia	Southern Asia	Panchet Dam floating solar farm	2			80	announced			PV						NTPC Renewable Energy		23.6802	86.7459	approximate		Nirsa-Cum-Chirkunda	Dhanbad District	Jharkhand	https://gem.wiki/Panchet_Dam_floating_solar_farm	L830012	G833852	INE733E01010	1	155	155	-99	40	80	120	0	0	0	0	0	0	0	0	0	0	0	0
solar	Cuba	Americas	Latin America and the Caribbean	Program-06 ISA solar farm	future phases	Parque Solar Program-06 ISA solar farm		1090	announced	2030		PV						Union Electrica de Cuba [50%]; NTPC Renewable Energy LTD [50%]		22.1866	-79.6516	approximate				Villa Clara	https://gem.wiki/Program-06_ISA_solar_farm	L832422	G837974	INE733E01010	0.5	1090	1090	-6	2070	2110	2150	0	0	0	0	0	0	0	0	0	0	0	0
solar	Cuba	Americas	Latin America and the Caribbean	Quemado Hilario (NTPC) solar farm		Parque Solar Quemado Hilario (NTPC)		5	pre-construction			PV						Union Electrica de Cuba [50%]; NTPC Renewable Energy LTD [50%]		22.435	-79.9326	approximate	Santa Clara			Villa Clara	https://gem.wiki/Quemado_Hilario_(NTPC)_solar_farm	L832423	G837975	INE733E01010	0.5	5	5	-99	40	80	120	0	0	0	0	0	0	0	0	0	0	0	0
solar	India	Asia	Southern Asia	Raigarh solar farm				50	operating	2014		PV						NTPC LTD		22.5001	83.5001	approximate		Raigarh		Chhattisgarh	https://gem.wiki/Raigarh_solar_farm	L800605	G800717	INE733E01010	1	50	50	10	2054	2094	2134	50	50	50	50	50	50	50	50	50	50	50	50
solar	India	Asia	Southern Asia	Ramagundam (NTPC) I solar farm			Ramagundam-3 Division	38	operating	2022		PV						NTPC LTD		18.7378	79.4635	exact		Ramagundam Floating		Telangana	https://gem.wiki/Ramagundam_(NTPC)_I_solar_farm	L800607	G800719	INE733E01010	1	38	38	2	2062	2102	2142	0	0	38	38	38	38	38	38	38	38	38	38
solar	India	Asia	Southern Asia	Ramagundam (NTPC) II solar farm			Ramagundam Floating Solar	62	operating	2022		PV						NTPC LTD		18.7378	79.4635	exact		Ramagundam		Telangana	https://gem.wiki/Ramagundam_(NTPC)_II_solar_farm	L800608	G800720	INE733E01010	1	62	62	2	2062	2102	2142	0	0	62	62	62	62	62	62	62	62	62	62
solar	India	Asia	Southern Asia	Rihand solar farm				20	pre-construction			PV						NTPC LTD		24.2033	83.0053	approximate		Rihand		Uttar Pradesh	https://gem.wiki/Rihand_solar_farm	L800609	G800721	INE733E01010	1	20	20	-99	40	80	120	0	0	0	0	0	0	0	0	0	0	0	0
solar	India	Asia	Southern Asia	Sadar Ayodhya solar farm				40	pre-construction			PV						NTPC LTD		26.7962	82.2066	approximate		Sadar	Ayodhya	Uttar Pradesh	https://gem.wiki/Sadar_Ayodhya_solar_farm	L830087	G833929	INE733E01010	1	40	40	-99	40	80	120	0	0	0	0	0	0	0	0	0	0	0	0
solar	India	Asia	Southern Asia	Sambhu Ki Bhurj II solar farm				150	operating	2022		PV						NTPC LTD		22.3376	71.7211	approximate				Gujarat	https://gem.wiki/Sambhu_Ki_Bhurj_II_solar_farm	L830096	G833938	INE733E01010	1	150	150	2	2062	2102	2142	0	0	150	150	150	150	150	150	150	150	150	150
solar	India	Asia	Southern Asia	Sambhu Ki Bhurj solar farm				300	operating	2022		PV						NTPC LTD		25.1862	75.8589	approximate		Sambhu Ki Bhurj		Rajasthan	https://gem.wiki/Sambhu_Ki_Bhurj_solar_farm	L800610	G800722	INE733E01010	1	300	300	2	2062	2102	2142	0	0	300	300	300	300	300	300	300	300	300	300
solar	Sri Lanka	Asia	Southern Asia	Sampur Solar Power Project	1		Trincomalee solar farm, Trincomalee Solar	50	announced	2025		PV						NTPC LTD; India and the Ceylon Electricity Board (CEB)		8.4824	81.2983	approximate			Trincomalee district		https://gem.wiki/Sampur_Solar_Power_Project	L808766	G811044	INE733E01010	0.5	135		-1	2065	2105	2145	0	0	0	0	0	0	0	0	0	0	0	0
solar	Sri Lanka	Asia	Southern Asia	Sampur Solar Power Project	2		Trincomalee solar farm, Trincomalee Solar	85	announced			PV						NTPC LTD; India and the Ceylon Electricity Board (CEB)		8.4824	81.2983	approximate			Trincomalee district		https://gem.wiki/Sampur_Solar_Power_Project	L808766	G834928	INE733E01010	0.5	135	135	-99	40	80	120	0	0	0	0	0	0	0	0	0	0	0	0
solar	India	Asia	Southern Asia	Shajapur solar park	1		Shajapur Solar	105	pre-construction	2023		PV						NTPC LTD		23.418	76.2705	approximate			Shajapur	Madhya Pradesh	https://gem.wiki/Shajapur_solar_park	L808946	G811249	INE733E01010	1	325		1	2063	2103	2143	0	0	0	0	0	0	0	0	0	0	0	0
solar	India	Asia	Southern Asia	Shajapur solar park	2		Shajapur Solar	220	pre-construction	2023		PV						NTPC LTD		23.418	76.2705	approximate			Shajapur	Madhya Pradesh	https://gem.wiki/Shajapur_solar_park	L808946	G811250	INE733E01010	1	325	325	1	2063	2103	2143	0	0	0	0	0	0	0	0	0	0	0	0
solar	India	Asia	Southern Asia	Simhadri Floating solar farm			Simhadri	25	operating	2021		PV						NTPC LTD		14.8221	78.2817	approximate		Simhadri Floating		Andhra Pradesh	https://gem.wiki/Simhadri_Floating_solar_farm	L800611	G800723	INE733E01010	1	25	25	3	2061	2101	2141	0	25	25	25	25	25	25	25	25	25	25	25
solar	India	Asia	Southern Asia	Solapur solar farm				23	operating	2023		Assumed PV						NTPC LTD		17.6578	75.9141	approximate		Solapur		Maharashtra	https://gem.wiki/Solapur_solar_farm	L800612	G800724	INE733E01010	1	23	23	1	2063	2103	2143	0	0	0	23	23	23	23	23	23	23	23	23
solar	India	Asia	Southern Asia	Tilaiya Dam floating solar farm				155	announced			PV						NTPC Renewable Energy		24.3228	85.5202	approximate		Chandwara	Kodarma District	Jharkhand	https://gem.wiki/Tilaiya_Dam_floating_solar_farm	L830197	G834046	INE733E01010	1	155	155	-99	40	80	120	0	0	0	0	0	0	0	0	0	0	0	0
wind	India	Asia	Southern Asia	Dayapar (NTPC) II wind farm				200	pre-construction			onshore						NTPC Renewable Energy LTD		23.6348	68.9012	approximate		Dayapar	Kutch	Gujarat	https://gem.wiki/Dayapar_(NTPC)_II_wind_farm	L917046	G921148	INE733E01010	1	200	200	-99	40	80	120	0	0	0	0	0	0	0	0	0	0	0	0
wind	India	Asia	Southern Asia	Dayapar (NTPC) III wind farm				150	pre-construction			onshore						NTPC LTD		23.6348	68.9012	approximate		Dayapar	Kutch	Gujarat	https://gem.wiki/Dayapar_(NTPC)_III_wind_farm	L922381	G927920	INE733E01010	1	150		-99	40	80	120	0	0	0	0	0	0	0	0	0	0	0	0
wind	India	Asia	Southern Asia	Dayapar (NTPC) wind farm				150	pre-construction			onshore						NTPC LTD		23.6348	68.9012	approximate		Dayapar	Kutch	Gujarat	https://gem.wiki/Dayapar_(NTPC)_wind_farm	L900499	G900577	INE733E01010	1	150	150	-99	40	80	120	0	0	0	0	0	0	0	0	0	0	0	0
wind	India	Asia	Southern Asia	NTPC Hybrid SECI IV wind farm				225	pre-construction	2024		onshore						NTPC LTD		23.2064	78.382	approximate			Kutch	Gujarat	https://gem.wiki/NTPC_Hybrid_SECI_IV_wind_farm	L917097	G921199	INE733E01010	1	225		0	2064	2104	2144	0	0	0	0	0	0	0	0	0	0	0	0
wind	India	Asia	Southern Asia	NTPC Hybrid SECI V wind farm				225	pre-construction	2023		onshore						NTPC Renewable Energy LTD		23.2064	78.382	approximate			Kutch	Gujarat	https://gem.wiki/NTPC_Hybrid_SECI_V_wind_farm	L917098	G921200	INE733E01010	1	225	225	1	2063	2103	2143	0	0	0	0	0	0	0	0	0	0	0	0
wind	India	Asia	Southern Asia	Rojmal (NTPC) wind farm				50	operating			onshore						NTPC LTD		22.5415	73.4334	approximate		Rojmal		Gujarat	https://gem.wiki/Rojmal_(NTPC)_wind_farm	L900500	G900578	INE733E01010	1	50	50	-99	40	80	120	50	50	50	50	50	50	50	50	50	50	50	50
																																			10069.3	0	0	55297.7	59182.7	62235.7	64708.7	69392.1	70192.1	70852.1	72432.1	74832.1	81182.1	81182.1	81182.1
																																					Coal	49575	53210	54325	56775	60938.4	61738.4	62398.4	63858.4	66258.4	72558.4	72558.4	72558.4
																																					Oil&Gas	4006.7	4006.7	4006.7	4006.7	4006.7	4006.7	4006.7	4006.7	4006.7	4056.7	4056.7	4056.7
																																					Fossil fuel	53581.7	57216.7	58331.7	60781.7	64945.1	65745.1	66405.1	67865.1	70265.1	76615.1	76615.1	76615.1
																																					Renewables	1716	1966	3904	3927	4447	4447	4447	4567	4567	4567	4567	4567
																																					Oil	0	0	0	0	0	0	0	0	0	0	0	0
																																					Gas	4006.7	4006.7	4006.7	4006.7	4006.7	4006.7	4006.7	4006.7	4006.7	4056.7	4056.7	4056.7
																																					Nuclear	0	0	0	0	0	0	0	0	0	0	0	0
																																					Wind	50	50	50	50	50	50	50	50	50	50	50	50
																																					solar	866	1116	3054	3077	3077	3077	3077	3077	3077	3077	3077	3077
																																					hydropower	800	800	800	800	1320	1320	1320	1440	1440	1440	1440	1440
																																					Total capacity without discounts	58022.7	62302.7	65810.7	68613.7
																																					Total capacity without discounts	56306.7	60336.7	61906.7	64686.7
[truncated: 19 more columns]

## Sheet: NTPC_TP
Type	Country/area	Region	Subregion	Plant / Project name	Unit / Phase name	Plant / Project name (local)	Plant / Project name (other)	Capacity (MW)	Status	Start year	Retired year	Technology	Fuel	Country/area 1 (hydropower only)	Country/area 2 (hydropower only)	Country/area 1 Capacity (MW) (hydropower only)	Country/area 2 Capacity (MW) (hydropower only)	Owner	Parent	Latitude	Longitude	Location accuracy	City	Local area (taluk, county)	Major area (prefecture, district)	Subnational unit (state, province)	GEM.Wiki URL	GEM location ID	GEM unit/phase ID	CompISIN	Ownership	Plant capacity	Plant capacity	Age	Reinvestment year	Reinvestment year	Reinvestment year	2020	2021	2022	2023	2024	2025	2026	2027	2028	2029	2030	2031
coal	India	Asia	Southern Asia	Anpara-E power station (MUNPL)	Unit 1			800	announced			supercritical	unknown					Meja Urja Nigam	NTPC Ltd; Uttar Pradesh Rajya Vidyut Utpadan Nigam Ltd	24.2046	82.7827	approximate	Anpara		Sonbhadra District	Uttar Pradesh	https://www.gem.wiki/Anpara-E_power_station_(MUNPL)	L100001000082	G100001000203	INE733E01010	0.5	1600		-99	40	80	120	0	0	0	0	0	0	0	0	0	800	800	800
coal	India	Asia	Southern Asia	Anpara-E power station (MUNPL)	Unit 2			800	announced			supercritical	unknown					Meja Urja Nigam	NTPC Ltd; Uttar Pradesh Rajya Vidyut Utpadan Nigam Ltd	24.2046	82.7827	approximate	Anpara		Sonbhadra District	Uttar Pradesh	https://www.gem.wiki/Anpara-E_power_station_(MUNPL)	L100001000082	G100001000204	INE733E01010	0.5	1600	1600	-99	40	80	120	0	0	0	0	0	0	0	0	0	800	800	800
coal	India	Asia	Southern Asia	Barh I power station	Unit 1		Barh STPP	660	operating	2021		supercritical	unknown					NTPC [100%]	NTPC [100.0%]	25.4693	85.7452	exact	Barh		Patna	Bihar	https://www.gem.wiki/Barh_I_power_station	L100000102092	G100000100623	INE733E01010	1	1980		3	2061	2101	2141	0	660	660	660	660	660	660	660	660	660	660	660
coal	India	Asia	Southern Asia	Barh I power station	Unit 2		Barh STPP	660	operating	2023		supercritical	unknown					NTPC [100%]	NTPC [100.0%]	25.4865	85.7452	exact	Barh		Patna	Bihar	https://www.gem.wiki/Barh_I_power_station	L100000102092	G100000100624	INE733E01010	1	1980		1	2063	2103	2143	0	0	0	660	660	660	660	660	660	660	660	660
coal	India	Asia	Southern Asia	Barh I power station	Unit 3		Barh STPP	660	construction	2024		supercritical	unknown					NTPC [100%]	NTPC [100.0%]	25.4865	85.7452	exact	Barh		Patna	Bihar	https://www.gem.wiki/Barh_I_power_station	L100000102092	G100000100625	INE733E01010	1	1980	1980	0	2064	2104	2144	0	0	0	0	660	660	660	660	660	660	660	660
coal	India	Asia	Southern Asia	Barh II power station	Unit 1			660	operating	2014		supercritical	unknown					NTPC [100%]	NTPC [100.0%]	25.4865	85.7452	exact	Barh		Patna	Bihar	https://www.gem.wiki/Barh_II_power_station	L100000102093	G100000100626	INE733E01010	1	1320		10	2054	2094	2134	660	660	660	660	660	660	660	660	660	660	660	660
coal	India	Asia	Southern Asia	Barh II power station	Unit 2			660	operating	2015		supercritical	unknown					NTPC [100%]	NTPC [100.0%]	25.4865	85.7452	exact	Barh		Patna	Bihar	https://www.gem.wiki/Barh_II_power_station	L100000102093	G100000100627	INE733E01010	1	1320	1320	9	2055	2095	2135	660	660	660	660	660	660	660	660	660	660	660	660
coal	India	Asia	Southern Asia	Bhilai Steel power station	Unit 2			30	operating	1982		subcritical	unknown					NTPC-SAIL Power [100%]	NTPC Ltd [50.0%]; Steel Authority of India Ltd [50.0%]	21.184	81.4237	exact	Bhilai		Durg	Chhattisgarh	https://www.gem.wiki/Bhilai_Steel_power_station	L100000102132	G100000100818	INE733E01010	0.5	560		42	2022	2062	2102	15	15	15	15	15	15	15	15	15	15	15	15
coal	India	Asia	Southern Asia	Bhilai Steel power station	Unit 3			30	operating	1983		subcritical	unknown					NTPC-SAIL Power [100%]	NTPC Ltd [50.0%]; Steel Authority of India Ltd [50.0%]	21.184	81.4237	exact	Bhilai		Durg	Chhattisgarh	https://www.gem.wiki/Bhilai_Steel_power_station	L100000102132	G100000100819	INE733E01010	0.5	560		41	2023	2063	2103	15	15	15	15	15	15	15	15	15	15	15	15
coal	India	Asia	Southern Asia	Bhilai Steel power station	Unit 4			250	operating	2009		subcritical	unknown					NTPC-SAIL Power [100%]	NTPC Ltd [50.0%]; Steel Authority of India Ltd [50.0%]	21.184	81.4237	exact	Bhilai		Durg	Chhattisgarh	https://www.gem.wiki/Bhilai_Steel_power_station	L100000102132	G100000100820	INE733E01010	0.5	560		15	2049	2089	2129	125	125	125	125	125	125	125	125	125	125	125	125
coal	India	Asia	Southern Asia	Bhilai Steel power station	Unit 5			250	operating	2009		subcritical	unknown					NTPC-SAIL Power [100%]	NTPC Ltd [50.0%]; Steel Authority of India Ltd [50.0%]	21.184	81.4237	exact	Bhilai		Durg	Chhattisgarh	https://www.gem.wiki/Bhilai_Steel_power_station	L100000102132	G100000100821	INE733E01010	0.5	560	560	15	2049	2089	2129	125	125	125	125	125	125	125	125	125	125	125	125
coal	India	Asia	Southern Asia	Bongaigaon power station	Unit 1			250	operating	2015		subcritical	bituminous					NTPC [100%]	NTPC [100.0%]	26.4444	90.3672	exact	Kumguri	Kokrajhar	Kokrajhar	Assam	https://www.gem.wiki/Bongaigaon_power_station	L100000102085	G100000101007	INE733E01010	1	750		9	2055	2095	2135	250	250	250	250	250	250	250	250	250	250	250	250
coal	India	Asia	Southern Asia	Bongaigaon power station	Unit 2			250	operating	2017		subcritical	bituminous					NTPC [100%]	NTPC [100.0%]	26.4444	90.3672	exact	Kumguri	Kokrajhar	Kokrajhar	Assam	https://www.gem.wiki/Bongaigaon_power_station	L100000102085	G100000101008	INE733E01010	1	750		7	2057	2097	2137	250	250	250	250	250	250	250	250	250	250	250	250
coal	India	Asia	Southern Asia	Bongaigaon power station	Unit 3			250	operating	2019		subcritical	bituminous					NTPC [100%]	NTPC [100.0%]	26.4444	90.3672	exact	Kumguri	Kokrajhar	Kokrajhar	Assam	https://www.gem.wiki/Bongaigaon_power_station	L100000102085	G100000101009	INE733E01010	1	750	750	5	2059	2099	2139	250	250	250	250	250	250	250	250	250	250	250	250
coal	India	Asia	Southern Asia	Darlipali power station	Phase I Unit 1		Darlipalli Super Thermal Power Station; Darlipali STPS	800	operating	2019		supercritical	unknown					NTPC [100%]	NTPC [100.0%]	21.9636	83.8919	exact	Darlipali	Lephripara	Sundergarh	Odisha	https://www.gem.wiki/Darlipali_power_station	L100000102458	G100000101987	INE733E01010	1	2400		5	2059	2099	2139	800	800	800	800	800	800	800	800	800	800	800	800
coal	India	Asia	Southern Asia	Darlipali power station	Phase I Unit 2		Darlipalli Super Thermal Power Station; Darlipali STPS	800	operating	2021		supercritical	unknown					NTPC [100%]	NTPC [100.0%]	21.9636	83.8919	exact	Darlipali	Lephripara	Sundergarh	Odisha	https://www.gem.wiki/Darlipali_power_station	L100000102458	G100000101988	INE733E01010	1	2400		3	2061	2101	2141	0	800	800	800	800	800	800	800	800	800	800	800
coal	India	Asia	Southern Asia	Darlipali power station	Phase II Unit 3		Darlipalli Super Thermal Power Station; Darlipali STPS	800	pre-permit			unknown	unknown					NTPC [100%]	NTPC [100.0%]	21.9636	83.8919	exact	Darlipali	Lephripara	Sundergarh	Odisha	https://www.gem.wiki/Darlipali_power_station	L100000102458	G100000115662	INE733E01010	1	2400	2400	-99	40	80	120	0	0	0	0	0	0	0	0	0	800	800	800
coal	India	Asia	Southern Asia	Durgapur SAIL power station	Phase 2 Unit 1			60	operating	1987		subcritical	unknown					NTPC-SAIL Power [100%]	NTPC Ltd [50.0%]; Steel Authority of India Ltd [50.0%]	23.5518	87.2485	exact	Durgapur steel mill	Durgapur	Bardhaman	West Bengal	https://www.gem.wiki/Durgapur_SAIL_power_station	L100000102671	G100000102511	INE733E01010	0.5	120		37	2027	2067	2107	30	30	30	30	30	30	30	30	30	30	30	30
coal	India	Asia	Southern Asia	Durgapur SAIL power station	Phase 2 Unit 2			60	operating	1988		subcritical	unknown					NTPC-SAIL Power [100%]	NTPC Ltd [50.0%]; Steel Authority of India Ltd [50.0%]	23.5518	87.2485	exact	Durgapur steel mill	Durgapur	Bardhaman	West Bengal	https://www.gem.wiki/Durgapur_SAIL_power_station	L100000102671	G100000102512	INE733E01010	0.5	120	120	36	2028	2068	2108	30	30	30	30	30	30	30	30	30	30	30	30
coal	India	Asia	Southern Asia	Farakka power station	Unit 1			200	operating	1986		subcritical	subbituminous					NTPC [100%]	NTPC [100.0%]	24.7727	87.8937	exact	Farakka	Farakka	Murshidabad	West Bengal	https://www.gem.wiki/Farakka_power_station	L100000102673	G100000102711	INE733E01010	1	2100		38	2026	2066	2106	200	200	200	200	200	200	200	200	200	200	200	200
coal	India	Asia	Southern Asia	Farakka power station	Unit 2			200	operating	1986		subcritical	subbituminous					NTPC [100%]	NTPC [100.0%]	24.7727	87.8937	exact	Farakka	Farakka	Murshidabad	West Bengal	https://www.gem.wiki/Farakka_power_station	L100000102673	G100000102712	INE733E01010	1	2100		38	2026	2066	2106	200	200	200	200	200	200	200	200	200	200	200	200
coal	India	Asia	Southern Asia	Farakka power station	Unit 3			200	operating	1987		subcritical	subbituminous					NTPC [100%]	NTPC [100.0%]	24.7727	87.8937	exact	Farakka	Farakka	Murshidabad	West Bengal	https://www.gem.wiki/Farakka_power_station	L100000102673	G100000102713	INE733E01010	1	2100		37	2027	2067	2107	200	200	200	200	200	200	200	200	200	200	200	200
coal	India	Asia	Southern Asia	Farakka power station	Unit 4			500	operating	1992		subcritical	subbituminous					NTPC [100%]	NTPC [100.0%]	24.7727	87.8937	exact	Farakka	Farakka	Murshidabad	West Bengal	https://www.gem.wiki/Farakka_power_station	L100000102673	G100000102714	INE733E01010	1	2100		32	2032	2072	2112	500	500	500	500	500	500	500	500	500	500	500	500
coal	India	Asia	Southern Asia	Farakka power station	Unit 5			500	operating	1994		subcritical	subbituminous					NTPC [100%]	NTPC [100.0%]	24.7727	87.8937	exact	Farakka	Farakka	Murshidabad	West Bengal	https://www.gem.wiki/Farakka_power_station	L100000102673	G100000102715	INE733E01010	1	2100		30	2034	2074	2114	500	500	500	500	500	500	500	500	500	500	500	500
coal	India	Asia	Southern Asia	Farakka power station	Unit 6			500	operating	2011		subcritical	subbituminous					NTPC [100%]	NTPC [100.0%]	24.7727	87.8937	exact	Farakka	Farakka	Murshidabad	West Bengal	https://www.gem.wiki/Farakka_power_station	L100000102673	G100000102716	INE733E01010	1	2100	2100	13	2051	2091	2131	500	500	500	500	500	500	500	500	500	500	500	500
coal	India	Asia	Southern Asia	Feroze Gandhi Unchahar Power Station	Unit 1		Unchahar plant	210	operating	1988		subcritical	bituminous					NTPC [100%]	NTPC [100.0%]	25.9138	81.3272	exact	Unchahar	Unchahar	Raebareli	Uttar Pradesh	https://www.gem.wiki/Feroze_Gandhi_Unchahar_Power_Station	L100000102626	G100000102747	INE733E01010	1	1550		36	2028	2068	2108	210	210	210	210	210	210	210	210	210	210	210	210
coal	India	Asia	Southern Asia	Feroze Gandhi Unchahar Power Station	Unit 2		Unchahar plant	210	operating	1989		subcritical	bituminous					NTPC [100%]	NTPC [100.0%]	25.9138	81.3272	exact	Unchahar	Unchahar	Raebareli	Uttar Pradesh	https://www.gem.wiki/Feroze_Gandhi_Unchahar_Power_Station	L100000102626	G100000102748	INE733E01010	1	1550		35	2029	2069	2109	210	210	210	210	210	210	210	210	210	210	210	210
coal	India	Asia	Southern Asia	Feroze Gandhi Unchahar Power Station	Unit 3		Unchahar plant	210	operating	1999		subcritical	bituminous					NTPC [100%]	NTPC [100.0%]	25.9138	81.3272	exact	Unchahar	Unchahar	Raebareli	Uttar Pradesh	https://www.gem.wiki/Feroze_Gandhi_Unchahar_Power_Station	L100000102626	G100000102749	INE733E01010	1	1550		25	2039	2079	2119	210	210	210	210	210	210	210	210	210	210	210	210
coal	India	Asia	Southern Asia	Feroze Gandhi Unchahar Power Station	Unit 4		Unchahar plant	210	operating	1999		subcritical	bituminous					NTPC [100%]	NTPC [100.0%]	25.9138	81.3272	exact	Unchahar	Unchahar	Raebareli	Uttar Pradesh	https://www.gem.wiki/Feroze_Gandhi_Unchahar_Power_Station	L100000102626	G100000102750	INE733E01010	1	1550		25	2039	2079	2119	210	210	210	210	210	210	210	210	210	210	210	210
coal	India	Asia	Southern Asia	Feroze Gandhi Unchahar Power Station	Unit 5		Unchahar plant	210	operating	2006		subcritical	bituminous					NTPC [100%]	NTPC [100.0%]	25.9138	81.3272	exact	Unchahar	Unchahar	Raebareli	Uttar Pradesh	https://www.gem.wiki/Feroze_Gandhi_Unchahar_Power_Station	L100000102626	G100000102751	INE733E01010	1	1550		18	2046	2086	2126	210	210	210	210	210	210	210	210	210	210	210	210
coal	India	Asia	Southern Asia	Feroze Gandhi Unchahar Power Station	Unit 6		Unchahar plant	500	operating	2017		subcritical	bituminous					NTPC [100%]	NTPC [100.0%]	25.9123	81.3206	exact	Unchahar		Raebareli	Uttar Pradesh	https://www.gem.wiki/Feroze_Gandhi_Unchahar_Power_Station	L100000102626	G100000102752	INE733E01010	1	1550	1550	7	2057	2097	2137	500	500	500	500	500	500	500	500	500	500	500	500
coal	India	Asia	Southern Asia	Gadarwara Super Thermal Power Project	Unit 1		Narsinghpur power station	800	operating	2018		unknown	unknown					NTPC [100%]	NTPC [100.0%]	22.8618	78.8661	exact	Chorbarheta	Gadarwara	Narsinghpur	Madhya Pradesh	https://www.gem.wiki/Gadarwara_Super_Thermal_Power_Project	L100000102332	G100000102892	INE733E01010	1	1600		6	2058	2098	2138	800	800	800	800	800	800	800	800	800	800	800	800
coal	India	Asia	Southern Asia	Gadarwara Super Thermal Power Project	Unit 2		Narsinghpur power station	800	operating	2021		unknown	unknown					NTPC [100%]	NTPC [100.0%]	22.8618	78.8661	exact	Chorbarheta	Gadarwara	Narsinghpur	Madhya Pradesh	https://www.gem.wiki/Gadarwara_Super_Thermal_Power_Project	L100000102332	G100000102893	INE733E01010	1	1600	1600	3	2061	2101	2141	0	800	800	800	800	800	800	800	800	800	800	800
coal	India	Asia	Southern Asia	Indira Gandhi Super Thermal Power Project	Unit 1		Aravali Thermal Power Project	500	operating	2010		subcritical	bituminous					Aravali Power Company [100%]	NTPC Ltd [50.0%]; Haryana Power Generation Co Ltd [25.0%]; Indraprastha Power Generation Co Ltd [25.0%]	28.4851	76.3732	exact	Jharli	Matenhail	Jhajjar	Haryana	https://www.gem.wiki/Indira_Gandhi_Super_Thermal_Power_Project	L100000102237	G100000104845	INE733E01010	0.5	1500		14	2050	2090	2130	250	250	250	250	250	250	250	250	250	250	250	250
coal	India	Asia	Southern Asia	Indira Gandhi Super Thermal Power Project	Unit 2		Aravali Thermal Power Project	500	operating	2011		subcritical	bituminous					Aravali Power Company [100%]	NTPC Ltd [50.0%]; Haryana Power Generation Co Ltd [25.0%]; Indraprastha Power Generation Co Ltd [25.0%]	28.4851	76.3732	exact	Jharli	Matenhail	Jhajjar	Haryana	https://www.gem.wiki/Indira_Gandhi_Super_Thermal_Power_Project	L100000102237	G100000104846	INE733E01010	0.5	1500		13	2051	2091	2131	250	250	250	250	250	250	250	250	250	250	250	250
coal	India	Asia	Southern Asia	Indira Gandhi Super Thermal Power Project	Unit 3		Aravali Thermal Power Project	500	operating	2012		subcritical	bituminous					Aravali Power Company [100%]	NTPC Ltd [50.0%]; Haryana Power Generation Co Ltd [25.0%]; Indraprastha Power Generation Co Ltd [25.0%]	28.4851	76.3732	exact	Jharli	Matenhail	Jhajjar	Haryana	https://www.gem.wiki/Indira_Gandhi_Super_Thermal_Power_Project	L100000102237	G100000104847	INE733E01010	0.5	1500	1500	12	2052	2092	2132	250	250	250	250	250	250	250	250	250	250	250	250
coal	India	Asia	Southern Asia	Kahalgaon Super Thermal Power Plant	Unit 1			210	operating	1992		subcritical	lignite					NTPC [100%]	NTPC [100.0%]	25.2369	87.2656	exact	Kahalgaon		Bhagalpur	Bihar	https://www.gem.wiki/Kahalgaon_Super_Thermal_Power_Plant	L100000102104	G100000105425	INE733E01010	1	2340		32	2032	2072	2112	210	210	210	210	210	210	210	210	210	210	210	210
coal	India	Asia	Southern Asia	Kahalgaon Super Thermal Power Plant	Unit 2			210	operating	1994		subcritical	lignite					NTPC [100%]	NTPC [100.0%]	25.2369	87.2656	exact	Kahalgaon		Bhagalpur	Bihar	https://www.gem.wiki/Kahalgaon_Super_Thermal_Power_Plant	L100000102104	G100000105426	INE733E01010	1	2340		30	2034	2074	2114	210	210	210	210	210	210	210	210	210	210	210	210
coal	India	Asia	Southern Asia	Kahalgaon Super Thermal Power Plant	Unit 3			210	operating	1995		subcritical	lignite					NTPC [100%]	NTPC [100.0%]	25.2369	87.2656	exact	Kahalgaon		Bhagalpur	Bihar	https://www.gem.wiki/Kahalgaon_Super_Thermal_Power_Plant	L100000102104	G100000105427	INE733E01010	1	2340		29	2035	2075	2115	210	210	210	210	210	210	210	210	210	210	210	210
coal	India	Asia	Southern Asia	Kahalgaon Super Thermal Power Plant	Unit 4			210	operating	1996		subcritical	lignite					NTPC [100%]	NTPC [100.0%]	25.2369	87.2656	exact	Kahalgaon		Bhagalpur	Bihar	https://www.gem.wiki/Kahalgaon_Super_Thermal_Power_Plant	L100000102104	G100000105428	INE733E01010	1	2340		28	2036	2076	2116	210	210	210	210	210	210	210	210	210	210	210	210
coal	India	Asia	Southern Asia	Kahalgaon Super Thermal Power Plant	Unit 5			500	operating	2008		subcritical	lignite					NTPC [100%]	NTPC [100.0%]	25.2369	87.2656	exact	Kahalgaon		Bhagalpur	Bihar	https://www.gem.wiki/Kahalgaon_Super_Thermal_Power_Plant	L100000102104	G100000105429	INE733E01010	1	2340		16	2048	2088	2128	500	500	500	500	500	500	500	500	500	500	500	500
coal	India	Asia	Southern Asia	Kahalgaon Super Thermal Power Plant	Unit 6			500	operating	2009		subcritical	lignite					NTPC [100%]	NTPC [100.0%]	25.2369	87.2656	exact	Kahalgaon		Bhagalpur	Bihar	https://www.gem.wiki/Kahalgaon_Super_Thermal_Power_Plant	L100000102104	G100000105430	INE733E01010	1	2340		15	2049	2089	2129	500	500	500	500	500	500	500	500	500	500	500	500
coal	India	Asia	Southern Asia	Kahalgaon Super Thermal Power Plant	Unit 7			500	operating	2010		subcritical	lignite					NTPC [100%]	NTPC [100.0%]	25.2369	87.2656	exact	Kahalgaon		Bhagalpur	Bihar	https://www.gem.wiki/Kahalgaon_Super_Thermal_Power_Plant	L100000102104	G100000105431	INE733E01010	1	2340	2340	14	2050	2090	2130	500	500	500	500	500	500	500	500	500	500	500	500
coal	India	Asia	Southern Asia	Katwa Super Thermal Power Project (NTPC)	Unit 1			660	shelved			supercritical	unknown					NTPC [100%]	NTPC [100.0%]	23.65	88.13	approximate	Katwa		Bardhaman	West Bengal	https://www.gem.wiki/Katwa_Super_Thermal_Power_Project_(NTPC)	L100000102676	G100000105623	INE733E01010	1	1320		-99	40	80	120	0	0	0	0	0	0	0	0	0	0	0	0
coal	India	Asia	Southern Asia	Katwa Super Thermal Power Project (NTPC)	Unit 2			660	shelved			supercritical	unknown					NTPC [100%]	NTPC [100.0%]	23.65	88.13	approximate	Katwa		Bardhaman	West Bengal	https://www.gem.wiki/Katwa_Super_Thermal_Power_Project_(NTPC)	L100000102676	G100000105624	INE733E01010	1	1320		-99	40	80	120	0	0	0	0	0	0	0	0	0	0	0	0
coal	India	Asia	Southern Asia	Khargone power station	Unit 1			660	operating	2019		ultra-supercritical	unknown					NTPC [100%]	NTPC [100.0%]	22.0652	75.8519	exact	Selda	Barwah	Khargone	Madhya Pradesh	https://www.gem.wiki/Khargone_power_station	L100000102345	G100000105722	INE733E01010	1	1320		5	2059	2099	2139	660	660	660	660	660	660	660	660	660	660	660	660
coal	India	Asia	Southern Asia	Khargone power station	Unit 2			660	operating	2020		ultra-supercritical	unknown					NTPC [100%]	NTPC [100.0%]	22.0652	75.8519	exact	Selda	Barwah	Khargone	Madhya Pradesh	https://www.gem.wiki/Khargone_power_station	L100000102345	G100000105723	INE733E01010	1	1320		4	2060	2100	2140	660	660	660	660	660	660	660	660	660	660	660	660
coal	India	Asia	Southern Asia	Khurja power station	Unit 1			660	construction	2024		supercritical	unknown					THDC India [100%]	NTPC Ltd [74.5%]; State of Uttar Pradesh [25.5%]	28.1583	77.9083	exact	Naiphal	Khurja	Bulandshahar	Uttar Pradesh	https://www.gem.wiki/Khurja_power_station	L100000102636	G100000105727	INE733E01010	0.745	1320		0	2064	2104	2144	0	0	0	0	491.7	491.7	491.7	491.7	491.7	491.7	491.7	491.7
coal	India	Asia	Southern Asia	Khurja power station	Unit 2			660	construction	2024		supercritical	unknown					THDC India [100%]	NTPC Ltd [74.5%]; State of Uttar Pradesh [25.5%]	28.1583	77.9083	exact	Naiphal	Khurja	Bulandshahar	Uttar Pradesh	https://www.gem.wiki/Khurja_power_station	L100000102636	G100000112418	INE733E01010	0.745	1320	1320	0	2064	2104	2144	0	0	0	0	491.7	491.7	491.7	491.7	491.7	491.7	491.7	491.7
coal	India	Asia	Southern Asia	Korba Super Thermal Power Station (NTPC)	Unit 1		Korba III power station (Unit 7) (Unit 7 (Korba III))	200	operating	1983		subcritical	bituminous					NTPC [100%]	NTPC [100.0%]	22.3874	82.6819	exact	Kusmunda	Katghora	Korba	Chhattisgarh	https://www.gem.wiki/Korba_Super_Thermal_Power_Station_(NTPC)	L100000102157	G100000105864	INE733E01010	1	2600		41	2023	2063	2103	200	200	200	200	200	200	200	200	200	200	200	200
coal	India	Asia	Southern Asia	Korba Super Thermal Power Station (NTPC)	Unit 2		Korba III power station (Unit 7) (Unit 7 (Korba III))	200	operating	1983		subcritical	bituminous					NTPC [100%]	NTPC [100.0%]	22.3874	82.6819	exact	Kusmunda	Katghora	Korba	Chhattisgarh	https://www.gem.wiki/Korba_Super_Thermal_Power_Station_(NTPC)	L100000102157	G100000105865	INE733E01010	1	2600		41	2023	2063	2103	200	200	200	200	200	200	200	200	200	200	200	200
coal	India	Asia	Southern Asia	Korba Super Thermal Power Station (NTPC)	Unit 3		Korba III power station (Unit 7) (Unit 7 (Korba III))	200	operating	1984		subcritical	bituminous					NTPC [100%]	NTPC [100.0%]	22.3874	82.6819	exact	Kusmunda	Katghora	Korba	Chhattisgarh	https://www.gem.wiki/Korba_Super_Thermal_Power_Station_(NTPC)	L100000102157	G100000105866	INE733E01010	1	2600		40	2024	2064	2104	200	200	200	200	200	200	200	200	200	200	200	200
coal	India	Asia	Southern Asia	Korba Super Thermal Power Station (NTPC)	Unit 4		Korba III power station (Unit 7) (Unit 7 (Korba III))	500	operating	1987		subcritical	bituminous					NTPC [100%]	NTPC [100.0%]	22.3874	82.6819	exact	Kusmunda	Katghora	Korba	Chhattisgarh	https://www.gem.wiki/Korba_Super_Thermal_Power_Station_(NTPC)	L100000102157	G100000105867	INE733E01010	1	2600		37	2027	2067	2107	500	500	500	500	500	500	500	500	500	500	500	500
coal	India	Asia	Southern Asia	Korba Super Thermal Power Station (NTPC)	Unit 5		Korba III power station (Unit 7) (Unit 7 (Korba III))	500	operating	1988		subcritical	bituminous					NTPC [100%]	NTPC [100.0%]	22.3874	82.6819	exact	Kusmunda	Katghora	Korba	Chhattisgarh	https://www.gem.wiki/Korba_Super_Thermal_Power_Station_(NTPC)	L100000102157	G100000105868	INE733E01010	1	2600		36	2028	2068	2108	500	500	500	500	500	500	500	500	500	500	500	500
coal	India	Asia	Southern Asia	Korba Super Thermal Power Station (NTPC)	Unit 6		Korba III power station (Unit 7) (Unit 7 (Korba III))	500	operating	1989		subcritical	bituminous					NTPC [100%]	NTPC [100.0%]	22.3874	82.6819	exact	Kusmunda	Katghora	Korba	Chhattisgarh	https://www.gem.wiki/Korba_Super_Thermal_Power_Station_(NTPC)	L100000102157	G100000105869	INE733E01010	1	2600		35	2029	2069	2109	500	500	500	500	500	500	500	500	500	500	500	500
coal	India	Asia	Southern Asia	Korba Super Thermal Power Station (NTPC)	Unit 7 (Korba III)		Korba III power station (Unit 7) (Unit 7 (Korba III))	500	operating	2010		subcritical	bituminous					NTPC [100%]	NTPC [100.0%]	22.3881	82.6858	exact	Kusmunda	Katghora	Korba	Chhattisgarh	https://www.gem.wiki/Korba_Super_Thermal_Power_Station_(NTPC)	L100000102157	G100000105870	INE733E01010	1	2600	2600	14	2050	2090	2130	500	500	500	500	500	500	500	500	500	500	500	500
coal	India	Asia	Southern Asia	Kudgi Super Thermal Power Project	Unit 1			800	operating	2016		supercritical	unknown					NTPC [100%]	NTPC [100.0%]	16.4995	75.8346	exact	Kudgi		Bijapur	Karnataka	https://www.gem.wiki/Kudgi_Super_Thermal_Power_Project	L100000102306	G100000106008	INE733E01010	1	2400		8	2056	2096	2136	800	800	800	800	800	800	800	800	800	800	800	800
coal	India	Asia	Southern Asia	Kudgi Super Thermal Power Project	Unit 2			800	operating	2017		supercritical	unknown					NTPC [100%]	NTPC [100.0%]	16.4995	75.8346	exact	Kudgi		Bijapur	Karnataka	https://www.gem.wiki/Kudgi_Super_Thermal_Power_Project	L100000102306	G100000106009	INE733E01010	1	2400		7	2057	2097	2137	800	800	800	800	800	800	800	800	800	800	800	800
coal	India	Asia	Southern Asia	Kudgi Super Thermal Power Project	Unit 3			800	operating	2018		supercritical	unknown					NTPC [100%]	NTPC [100.0%]	16.4995	75.8346	exact	Kudgi		Bijapur	Karnataka	https://www.gem.wiki/Kudgi_Super_Thermal_Power_Project	L100000102306	G100000106010	INE733E01010	1	2400	2400	6	2058	2098	2138	800	800	800	800	800	800	800	800	800	800	800	800
coal	India	Asia	Southern Asia	Lara Integrated Thermal Power Project	Unit 1		NTPC Lara, Lara STPP	800	operating	2018		supercritical	unknown					NTPC [100%]	NTPC [100.0%]	21.7577	83.4575	exact	Mahloi	Pussore	Raigarh	Chhattisgarh	https://www.gem.wiki/Lara_Integrated_Thermal_Power_Project	L100000102164	G100000106174	INE733E01010	1	3200		6	2058	2098	2138	800	800	800	800	800	800	800	800	800	800	800	800
coal	India	Asia	Southern Asia	Lara Integrated Thermal Power Project	Unit 2		NTPC Lara, Lara STPP	800	operating	2020		supercritical	unknown					NTPC [100%]	NTPC [100.0%]	21.7577	83.4575	exact	Mahloi	Pussore	Raigarh	Chhattisgarh	https://www.gem.wiki/Lara_Integrated_Thermal_Power_Project	L100000102164	G100000106175	INE733E01010	1	3200		4	2060	2100	2140	800	800	800	800	800	800	800	800	800	800	800	800
coal	India	Asia	Southern Asia	Lara Integrated Thermal Power Project	Unit 3		NTPC Lara, Lara STPP	800	permitted	2028		supercritical	unknown					NTPC [100%]	NTPC [100.0%]	21.7577	83.4575	exact	Mahloi	Pussore	Raigarh	Chhattisgarh	https://www.gem.wiki/Lara_Integrated_Thermal_Power_Project	L100000102164	G100000106176	INE733E01010	1	3200		-4	2068	2108	2148	0	0	0	0	0	0	0	0	800	800	800	800
coal	India	Asia	Southern Asia	Lara Integrated Thermal Power Project	Unit 4		NTPC Lara, Lara STPP	800	permitted	2028		supercritical	unknown					NTPC [100%]	NTPC [100.0%]	21.7577	83.4575	exact	Mahloi	Pussore	Raigarh	Chhattisgarh	https://www.gem.wiki/Lara_Integrated_Thermal_Power_Project	L100000102164	G100000106177	INE733E01010	1	3200	3200	-4	2068	2108	2148	0	0	0	0	0	0	0	0	800	800	800	800
coal	India	Asia	Southern Asia	Mauda power station	Unit 1		Mouda Super Thermal Power Project	500	operating	2012		subcritical	unknown					NTPC [100%]	NTPC [100.0%]	21.1807	79.3965	exact		Mouda	Nabpur	Maharashtra	https://www.gem.wiki/Mauda_power_station	L100000102415	G100000106746	INE733E01010	1	2320		12	2052	2092	2132	500	500	500	500	500	500	500	500	500	500	500	500
coal	India	Asia	Southern Asia	Mauda power station	Unit 2		Mouda Super Thermal Power Project	500	operating	2013		subcritical	unknown					NTPC [100%]	NTPC [100.0%]	21.1807	79.3965	exact		Mouda	Nabpur	Maharashtra	https://www.gem.wiki/Mauda_power_station	L100000102415	G100000106747	INE733E01010	1	2320		11	2053	2093	2133	500	500	500	500	500	500	500	500	500	500	500	500
coal	India	Asia	Southern Asia	Mauda power station	Unit 3		Mouda Super Thermal Power Project	660	operating	2016		supercritical	unknown					NTPC [100%]	NTPC [100.0%]	21.1807	79.3965	exact		Mouda	Nabpur	Maharashtra	https://www.gem.wiki/Mauda_power_station	L100000102415	G100000106748	INE733E01010	1	2320		8	2056	2096	2136	660	660	660	660	660	660	660	660	660	660	660	660
coal	India	Asia	Southern Asia	Mauda power station	Unit 4		Mouda Super Thermal Power Project	660	operating	2017		supercritical	unknown					NTPC [100%]	NTPC [100.0%]	21.1807	79.3965	exact		Mouda	Nabpur	Maharashtra	https://www.gem.wiki/Mauda_power_station	L100000102415	G100000106749	INE733E01010	1	2320	2320	7	2057	2097	2137	660	660	660	660	660	660	660	660	660	660	660	660
coal	India	Asia	Southern Asia	Meja Thermal Power Project	Stage I Unit 1			660	operating	2018		supercritical	unknown					Meja Urja Nigam [100%]	NTPC Ltd [50.0%]; Uttar Pradesh Rajya Vidyut Utpadan Nigam Ltd [50.0%]	25.1459	81.9401	exact	Meja		Allahabad	Uttar Pradesh	https://www.gem.wiki/Meja_Thermal_Power_Project	L100000102640	G100000106821	INE733E01010	0.5	3720		6	2058	2098	2138	330	330	330	330	330	330	330	330	330	330	330	330
coal	India	Asia	Southern Asia	Meja Thermal Power Project	Stage I Unit 2			660	operating	2021		supercritical	unknown					Meja Urja Nigam [100%]	NTPC Ltd [50.0%]; Uttar Pradesh Rajya Vidyut Utpadan Nigam Ltd [50.0%]	25.1459	81.9401	exact	Meja		Allahabad	Uttar Pradesh	https://www.gem.wiki/Meja_Thermal_Power_Project	L100000102640	G100000106822	INE733E01010	0.5	3720		3	2061	2101	2141	0	330	330	330	330	330	330	330	330	330	330	330
coal	India	Asia	Southern Asia	Meja Thermal Power Project	Stage II Unit 3			800	pre-permit			unknown	unknown					Meja Urja Nigam [100%]	NTPC Ltd [50.0%]; Uttar Pradesh Rajya Vidyut Utpadan Nigam Ltd [50.0%]	25.1459	81.9401	exact	Meja		Allahabad	Uttar Pradesh	https://www.gem.wiki/Meja_Thermal_Power_Project	L100000102640	G100000115761	INE733E01010	0.5	3720		-99	40	80	120	0	0	0	0	0	0	0	0	0	400	400	400
coal	India	Asia	Southern Asia	Meja Thermal Power Project	Stage II Unit 4			800	pre-permit			unknown	unknown					Meja Urja Nigam [100%]	NTPC Ltd [50.0%]; Uttar Pradesh Rajya Vidyut Utpadan Nigam Ltd [50.0%]	25.1459	81.9401	exact	Meja		Allahabad	Uttar Pradesh	https://www.gem.wiki/Meja_Thermal_Power_Project	L100000102640	G100000115762	INE733E01010	0.5	3720		-99	40	80	120	0	0	0	0	0	0	0	0	0	400	400	400
coal	India	Asia	Southern Asia	Meja Thermal Power Project	Stage II Unit 5			800	pre-permit			unknown	unknown					Meja Urja Nigam [100%]	NTPC Ltd [50.0%]; Uttar Pradesh Rajya Vidyut Utpadan Nigam Ltd [50.0%]	25.1459	81.9401	exact	Meja		Allahabad	Uttar Pradesh	https://www.gem.wiki/Meja_Thermal_Power_Project	L100000102640	G100001000259	INE733E01010	0.5	3720	3720	-99	40	80	120	0	0	0	0	0	0	0	0	0	400	400	400
coal	India	Asia	Southern Asia	Muzaffarpur power station	Unit 3		Kanti power station, Kanti Muzaffarpur power station	195	operating	2015		subcritical	bituminous					Kanti Bijlee Utpadan Nigam [100%]	NTPC Ltd [100.0%]	26.1948	85.3033	exact	Kanti		Muzaffarpur	Bihar	https://www.gem.wiki/Muzaffarpur_power_station	L100000102112	G100000107144	INE733E01010	1	390		9	2055	2095	2135	195	195	195	195	195	195	195	195	195	195	195	195
coal	India	Asia	Southern Asia	Muzaffarpur power station	Unit 4		Kanti power station, Kanti Muzaffarpur power station	195	operating	2017		unknown	unknown					Kanti Bijlee Utpadan Nigam [100%]	NTPC Ltd [100.0%]	26.1948	85.3033	exact	Kanti		Muzaffarpur	Bihar	https://www.gem.wiki/Muzaffarpur_power_station	L100000102112	G100000107145	INE733E01010	1	390	390	7	2057	2097	2137	195	195	195	195	195	195	195	195	195	195	195	195
coal	India	Asia	Southern Asia	Nabinagar Super Thermal Power Project	Unit 1		New Nabi Nagar	660	operating	2019		supercritical	unknown					Nabinagar Power Generating Company [100%]	NTPC Ltd [100.0%]	24.776	84.158	exact	Majhiyan and Ankorha	Nabinagar	Aurangabad	Bihar	https://www.gem.wiki/Nabinagar_Super_Thermal_Power_Project	L100000102113	G100000107158	INE733E01010	1	1980		5	2059	2099	2139	660	660	660	660	660	660	660	660	660	660	660	660
coal	India	Asia	Southern Asia	Nabinagar Super Thermal Power Project	Unit 2		New Nabi Nagar	660	operating	2021		supercritical	unknown					Nabinagar Power Generating Company [100%]	NTPC Ltd [100.0%]	24.776	84.158	exact	Majhiyan and Ankorha	Nabinagar	Aurangabad	Bihar	https://www.gem.wiki/Nabinagar_Super_Thermal_Power_Project	L100000102113	G100000107159	INE733E01010	1	1980		3	2061	2101	2141	0	660	660	660	660	660	660	660	660	660	660	660
coal	India	Asia	Southern Asia	Nabinagar Super Thermal Power Project	Unit 3		New Nabi Nagar	660	operating	2022		supercritical	unknown					Nabinagar Power Generating Company [100%]	NTPC Ltd [100.0%]	24.776	84.158	exact	Majhiyan and Ankorha	Nabinagar	Aurangabad	Bihar	https://www.gem.wiki/Nabinagar_Super_Thermal_Power_Project	L100000102113	G100000107160	INE733E01010	1	1980	1980	2	2062	2102	2142	0	0	660	660	660	660	660	660	660	660	660	660
coal	India	Asia	Southern Asia	Nabinagar Thermal Power Project	Unit 1		Nabi Nagar TPP	250	operating	2016		subcritical	unknown					Bhartiya Rail Bijlee [100%]	NTPC Ltd [74.0%]; Indian Railways [26.0%]	24.7051	84.0887	exact	Dhundwa	Nabinagar	Aurangabad	Bihar	https://www.gem.wiki/Nabinagar_Thermal_Power_Project	L100000102114	G100000107161	INE733E01010	0.74	1000		8	2056	2096	2136	185	185	185	185	185	185	185	185	185	185	185	185
coal	India	Asia	Southern Asia	Nabinagar Thermal Power Project	Unit 2		Nabi Nagar TPP	250	operating	2017		subcritical	unknown					Bhartiya Rail Bijlee [100%]	NTPC Ltd [74.0%]; Indian Railways [26.0%]	24.7051	84.0887	exact	Dhundwa	Nabinagar	Aurangabad	Bihar	https://www.gem.wiki/Nabinagar_Thermal_Power_Project	L100000102114	G100000107162	INE733E01010	0.74	1000		7	2057	2097	2137	185	185	185	185	185	185	185	185	185	185	185	185
coal	India	Asia	Southern Asia	Nabinagar Thermal Power Project	Unit 3		Nabi Nagar TPP	250	operating	2019		subcritical	unknown					Bhartiya Rail Bijlee [100%]	NTPC Ltd [74.0%]; Indian Railways [26.0%]	24.7051	84.0887	exact	Dhundwa	Nabinagar	Aurangabad	Bihar	https://www.gem.wiki/Nabinagar_Thermal_Power_Project	L100000102114	G100000107163	INE733E01010	0.74	1000		5	2059	2099	2139	185	185	185	185	185	185	185	185	185	185	185	185
coal	India	Asia	Southern Asia	Nabinagar Thermal Power Project	Unit 4		Nabi Nagar TPP	250	operating	2021		subcritical	unknown					Bhartiya Rail Bijlee [100%]	NTPC Ltd [74.0%]; Indian Railways [26.0%]	24.7051	84.0887	exact	Dhundwa	Nabinagar	Aurangabad	Bihar	https://www.gem.wiki/Nabinagar_Thermal_Power_Project	L100000102114	G100000107164	INE733E01010	0.74	1000	1000	3	2061	2101	2141	0	185	185	185	185	185	185	185	185	185	185	185
coal	India	Asia	Southern Asia	National Capital Dadri Thermal Power Plant	Stage I Unit 1		NCTPP; NTPC Dadri	210	operating	1991		subcritical	unknown					NTPC [100%]	NTPC [100.0%]	28.603	77.6078	exact	Dadri	Dadri	Gautam Buddha Nagar	Uttar Pradesh	https://www.gem.wiki/National_Capital_Dadri_Thermal_Power_Plant	L100000102642	G100000107306	INE733E01010	1	1820		33	2031	2071	2111	210	210	210	210	210	210	210	210	210	210	210	210
coal	India	Asia	Southern Asia	National Capital Dadri Thermal Power Plant	Stage I Unit 2		NCTPP; NTPC Dadri	210	operating	1992		subcritical	unknown					NTPC [100%]	NTPC [100.0%]	28.603	77.6078	exact	Dadri	Dadri	Gautam Buddha Nagar	Uttar Pradesh	https://www.gem.wiki/National_Capital_Dadri_Thermal_Power_Plant	L100000102642	G100000107307	INE733E01010	1	1820		32	2032	2072	2112	210	210	210	210	210	210	210	210	210	210	210	210
coal	India	Asia	Southern Asia	National Capital Dadri Thermal Power Plant	Stage I Unit 3		NCTPP; NTPC Dadri	210	operating	1993		subcritical	unknown					NTPC [100%]	NTPC [100.0%]	28.603	77.6078	exact	Dadri	Dadri	Gautam Buddha Nagar	Uttar Pradesh	https://www.gem.wiki/National_Capital_Dadri_Thermal_Power_Plant	L100000102642	G100000107308	INE733E01010	1	1820		31	2033	2073	2113	210	210	210	210	210	210	210	210	210	210	210	210
coal	India	Asia	Southern Asia	National Capital Dadri Thermal Power Plant	Stage I Unit 4		NCTPP; NTPC Dadri	210	operating	1994		subcritical	unknown					NTPC [100%]	NTPC [100.0%]	28.603	77.6078	exact	Dadri	Dadri	Gautam Buddha Nagar	Uttar Pradesh	https://www.gem.wiki/National_Capital_Dadri_Thermal_Power_Plant	L100000102642	G100000107309	INE733E01010	1	1820		30	2034	2074	2114	210	210	210	210	210	210	210	210	210	210	210	210
coal	India	Asia	Southern Asia	National Capital Dadri Thermal Power Plant	Stage II Unit 5		NCTPP; NTPC Dadri	490	operating	2010		subcritical	unknown					NTPC [100%]	NTPC [100.0%]	28.603	77.6078	exact	Dadri	Dadri	Gautam Budh Nagar	Uttar Pradesh	https://www.gem.wiki/National_Capital_Dadri_Thermal_Power_Plant	L100000102642	G100000107310	INE733E01010	1	1820		14	2050	2090	2130	490	490	490	490	490	490	490	490	490	490	490	490
coal	India	Asia	Southern Asia	National Capital Dadri Thermal Power Plant	Stage II Unit 6		NCTPP; NTPC Dadri	490	operating	2010		subcritical	unknown					NTPC [100%]	NTPC [100.0%]	28.603	77.6078	exact	Dadri	Dadri	Gautam Budh Nagar	Uttar Pradesh	https://www.gem.wiki/National_Capital_Dadri_Thermal_Power_Plant	L100000102642	G100000107311	INE733E01010	1	1820	1820	14	2050	2090	2130	490	490	490	490	490	490	490	490	490	490	490	490
coal	India	Asia	Southern Asia	North Karanpura power station	Unit 1			660	operating	2023		supercritical	unknown					NTPC [100%]	NTPC [100.0%]	23.8508	85.0124	exact	Tandwa town		Chatra	Jharkhand	https://www.gem.wiki/North_Karanpura_power_station	L100000102278	G100000107506	INE733E01010	1	1980		1	2063	2103	2143	0	0	0	660	660	660	660	660	660	660	660	660
coal	India	Asia	Southern Asia	North Karanpura power station	Unit 2			660	construction	2024		supercritical	unknown					NTPC [100%]	NTPC [100.0%]	23.8508	85.0124	exact	Tandwa town		Chatra	Jharkhand	https://www.gem.wiki/North_Karanpura_power_station	L100000102278	G100000107507	INE733E01010	1	1980		0	2064	2104	2144	0	0	0	0	660	660	660	660	660	660	660	660
coal	India	Asia	Southern Asia	North Karanpura power station	Unit 3			660	construction	2024		supercritical	unknown					NTPC [100%]	NTPC [100.0%]	23.8508	85.0124	exact	Tandwa town		Chatra	Jharkhand	https://www.gem.wiki/North_Karanpura_power_station	L100000102278	G100000107508	INE733E01010	1	1980	1980	0	2064	2104	2144	0	0	0	0	660	660	660	660	660	660	660	660
coal	India	Asia	Southern Asia	NTPC Seoni power station	Phase 1		Jhabua Power Seoni power station	600	operating	2016		subcritical	unknown					Jhabua Power [100%]	NTPC Ltd [50.0%]; other unknown/mixed entity types [41.3%]; Yes Bank Ltd [8.7%]	22.7355	79.9123	exact	Barela and Gorakhpur	Ghansore	Seoni	Madhya Pradesh	https://www.gem.wiki/NTPC_Seoni_power_station	L100000102340	G100000105026	INE733E01010	0.5	1200		8	2056	2096	2136	300	300	300	300	300	300	300	300	300	300	300	300
coal	India	Asia	Southern Asia	NTPC Seoni power station	Phase 2		Jhabua Power Seoni power station	600	permitted			subcritical	unknown					Jhabua Power [100%]	NTPC Ltd [50.0%]; other unknown/mixed entity types [41.3%]; Yes Bank Ltd [8.7%]	22.7355	79.9123	exact	Barela and Gorakhpur	Ghansore	Seoni	Madhya Pradesh	https://www.gem.wiki/NTPC_Seoni_power_station	L100000102340	G100000105027	INE733E01010	0.5	1200	1200	-99	40	80	120	0	0	0	0	0	0	0	0	0	300	300	300
coal	India	Asia	Southern Asia	Obra Thermal Power Station	D Unit 1			800	announced	2027		ultra-supercritical	unknown					State of Uttar Pradesh [50%]; NTPC [50%]	NTPC [50.0%]; State of Uttar Pradesh [50.0%]	24.4445	82.98	exact			Sonbhadra	Uttar Pradesh	https://www.gem.wiki/Obra_Thermal_Power_Station	L100000102644	G100000115946	INE733E01010	0.5	1600		-3	2067	2107	2147	0	0	0	0	0	0	0	800	800	800	800	800
coal	India	Asia	Southern Asia	Obra Thermal Power Station	D Unit 2			800	announced	2028		ultra-supercritical	unknown					State of Uttar Pradesh [50%]; NTPC [50%]	NTPC [50.0%]; State of Uttar Pradesh [50.0%]	24.4445	82.98	exact			Sonbhadra	Uttar Pradesh	https://www.gem.wiki/Obra_Thermal_Power_Station	L100000102644	G100000115947	INE733E01010	0.5	1600	1600	-4	2068	2108	2148	0	0	0	0	0	0	0	0	800	800	800	800
coal	India	Asia	Southern Asia	Patratu JSEB power station	Unit 11		Patratu UMPP	800	construction	2024		supercritical	unknown					Jharkhand State Electricity Board; NTPC	Jharkhand State Electricity Board; NTPC	23.64	85.2931	exact	Patratu	Patratu	Ramgarh	Jharkhand	https://www.gem.wiki/Patratu_JSEB_power_station	L100000102281	G100000107870	INE733E01010	0.5	2400		0	2064	2104	2144	0	0	0	0	400	400	400	400	400	400	400	400
coal	India	Asia	Southern Asia	Patratu JSEB power station	Unit 12		Patratu UMPP	800	construction	2025		supercritical	unknown					Jharkhand State Electricity Board; NTPC	Jharkhand State Electricity Board; NTPC	23.64	85.2931	exact	Patratu	Patratu	Ramgarh	Jharkhand	https://www.gem.wiki/Patratu_JSEB_power_station	L100000102281	G100000107871	INE733E01010	0.5	2400		-1	2065	2105	2145	0	0	0	0	0	400	400	400	400	400	400	400
coal	India	Asia	Southern Asia	Patratu JSEB power station	Unit 13		Patratu UMPP	800	construction	2025		supercritical	unknown					Jharkhand State Electricity Board; NTPC	Jharkhand State Electricity Board; NTPC	23.64	85.2931	exact	Patratu	Patratu	Ramgarh	Jharkhand	https://www.gem.wiki/Patratu_JSEB_power_station	L100000102281	G100000107872	INE733E01010	0.5	2400	2400	-1	2065	2105	2145	0	0	0	0	0	400	400	400	400	400	400	400
coal	India	Asia	Southern Asia	Ramagundam power station	Stage I Unit 1		Telangana TPP (Stage IV Unit 8, Stage IV Unit 9, Stage V Unit 10, Stage V Unit 11, Stage V Unit 12), Telangana super thermal power project (Stage IV Unit 8, Stage IV Unit 9, Stage V Unit 10, Stage V Unit 11, Stage V Unit 12)	200	operating	1983		subcritical	bituminous					NTPC [100%]	NTPC [100.0%]	18.7585	79.4573	exact	Ramagundam	Ramagundam	Karimnagar	Telangana	https://www.gem.wiki/Ramagundam_power_station	L100000102602	G100000108463	INE733E01010	1	4200		41	2023	2063	2103	200	200	200	200	200	200	200	200	200	200	200	200
coal	India	Asia	Southern Asia	Ramagundam power station	Stage I Unit 2		Telangana TPP (Stage IV Unit 8, Stage IV Unit 9, Stage V Unit 10, Stage V Unit 11, Stage V Unit 12), Telangana super thermal power project (Stage IV Unit 8, Stage IV Unit 9, Stage V Unit 10, Stage V Unit 11, Stage V Unit 12)	200	operating	1984		subcritical	bituminous					NTPC [100%]	NTPC [100.0%]	18.7585	79.4573	exact	Ramagundam	Ramagundam	Karimnagar	Telangana	https://www.gem.wiki/Ramagundam_power_station	L100000102602	G100000108464	INE733E01010	1	4200		40	2024	2064	2104	200	200	200	200	200	200	200	200	200	200	200	200
coal	India	Asia	Southern Asia	Ramagundam power station	Stage I Unit 3		Telangana TPP (Stage IV Unit 8, Stage IV Unit 9, Stage V Unit 10, Stage V Unit 11, Stage V Unit 12), Telangana super thermal power project (Stage IV Unit 8, Stage IV Unit 9, Stage V Unit 10, Stage V Unit 11, Stage V Unit 12)	200	operating	1984		subcritical	bituminous					NTPC [100%]	NTPC [100.0%]	18.7585	79.4573	exact	Ramagundam	Ramagundam	Karimnagar	Telangana	https://www.gem.wiki/Ramagundam_power_station	L100000102602	G100000108465	INE733E01010	1	4200		40	2024	2064	2104	200	200	200	200	200	200	200	200	200	200	200	200
coal	India	Asia	Southern Asia	Ramagundam power station	Stage II Unit 4		Telangana TPP (Stage IV Unit 8, Stage IV Unit 9, Stage V Unit 10, Stage V Unit 11, Stage V Unit 12), Telangana super thermal power project (Stage IV Unit 8, Stage IV Unit 9, Stage V Unit 10, Stage V Unit 11, Stage V Unit 12)	500	operating	1988		subcritical	bituminous					NTPC [100%]	NTPC [100.0%]	18.7585	79.4573	exact	Ramagundam	Ramagundam	Karimnagar	Telangana	https://www.gem.wiki/Ramagundam_power_station	L100000102602	G100000108466	INE733E01010	1	4200		36	2028	2068	2108	500	500	500	500	500	500	500	500	500	500	500	500
coal	India	Asia	Southern Asia	Ramagundam power station	Stage II Unit 5		Telangana TPP (Stage IV Unit 8, Stage IV Unit 9, Stage V Unit 10, Stage V Unit 11, Stage V Unit 12), Telangana super thermal power project (Stage IV Unit 8, Stage IV Unit 9, Stage V Unit 10, Stage V Unit 11, Stage V Unit 12)	500	operating	1989		subcritical	bituminous					NTPC [100%]	NTPC [100.0%]	18.7585	79.4573	exact	Ramagundam	Ramagundam	Karimnagar	Telangana	https://www.gem.wiki/Ramagundam_power_station	L100000102602	G100000108467	INE733E01010	1	4200		35	2029	2069	2109	500	500	500	500	500	500	500	500	500	500	500	500
coal	India	Asia	Southern Asia	Ramagundam power station	Stage II Unit 6		Telangana TPP (Stage IV Unit 8, Stage IV Unit 9, Stage V Unit 10, Stage V Unit 11, Stage V Unit 12), Telangana super thermal power project (Stage IV Unit 8, Stage IV Unit 9, Stage V Unit 10, Stage V Unit 11, Stage V Unit 12)	500	operating	1989		subcritical	bituminous					NTPC [100%]	NTPC [100.0%]	18.7585	79.4573	exact	Ramagundam	Ramagundam	Karimnagar	Telangana	https://www.gem.wiki/Ramagundam_power_station	L100000102602	G100000108468	INE733E01010	1	4200		35	2029	2069	2109	500	500	500	500	500	500	500	500	500	500	500	500
coal	India	Asia	Southern Asia	Ramagundam power station	Stage III Unit 7		Telangana TPP (Stage IV Unit 8, Stage IV Unit 9, Stage V Unit 10, Stage V Unit 11, Stage V Unit 12), Telangana super thermal power project (Stage IV Unit 8, Stage IV Unit 9, Stage V Unit 10, Stage V Unit 11, Stage V Unit 12)	500	operating	2005		subcritical	bituminous					NTPC [100%]	NTPC [100.0%]	18.7585	79.4573	exact	Ramagundam	Ramagundam	Karimnagar	Telangana	https://www.gem.wiki/Ramagundam_power_station	L100000102602	G100000108469	INE733E01010	1	4200		19	2045	2085	2125	500	500	500	500	500	500	500	500	500	500	500	500
coal	India	Asia	Southern Asia	Ramagundam power station	Stage IV Unit 8		Telangana TPP (Stage IV Unit 8, Stage IV Unit 9, Stage V Unit 10, Stage V Unit 11, Stage V Unit 12), Telangana super thermal power project (Stage IV Unit 8, Stage IV Unit 9, Stage V Unit 10, Stage V Unit 11, Stage V Unit 12)	800	operating	2023		supercritical	unknown					NTPC [100%]	NTPC [100.0%]	18.751	79.4722	exact	Ramagundam	Ramagundam	Karimnagar	Telangana	https://www.gem.wiki/Ramagundam_power_station	L100000102602	G100000108470	INE733E01010	1	4200		1	2063	2103	2143	0	0	0	800	800	800	800	800	800	800	800	800
coal	India	Asia	Southern Asia	Ramagundam power station	Stage IV Unit 9		Telangana TPP (Stage IV Unit 8, Stage IV Unit 9, Stage V Unit 10, Stage V Unit 11, Stage V Unit 12), Telangana super thermal power project (Stage IV Unit 8, Stage IV Unit 9, Stage V Unit 10, Stage V Unit 11, Stage V Unit 12)	800	construction	2024		supercritical	unknown					NTPC [100%]	NTPC [100.0%]	18.751	79.4722	exact	Ramagundam	Ramagundam	Karimnagar	Telangana	https://www.gem.wiki/Ramagundam_power_station	L100000102602	G100000108471	INE733E01010	1	4200	4200	0	2064	2104	2144	0	0	0	0	800	800	800	800	800	800	800	800
coal	Bangladesh	Asia	Southern Asia	Rampal power station	Unit 1		Maitree Super Thermal Power Project, Khulna Large power station, Khulna South power station	660	operating	2022		supercritical	unknown					Bangladesh India Friendship Power Company [100%]	Bangladesh Power Development Board [50.0%]; NTPC Ltd [50.0%]	22.5925	89.5564	exact	Rampal		Bagerhat	Khulna	https://www.gem.wiki/Rampal_power_station	L100000100077	G100000108473	INE733E01010	0.5	1320		2	2062	2102	2142	0	0	330	330	330	330	330	330	330	330	330	330
coal	Bangladesh	Asia	Southern Asia	Rampal power station	Unit 2		Maitree Super Thermal Power Project, Khulna Large power station, Khulna South power station	660	construction	2023		supercritical	unknown					Bangladesh India Friendship Power Company [100%]	Bangladesh Power Development Board [50.0%]; NTPC Ltd [50.0%]	22.5925	89.5564	exact	Rampal		Bagerhat	Khulna	https://www.gem.wiki/Rampal_power_station	L100000100077	G100000108474	INE733E01010	0.5	1320	1320	1	2063	2103	2143	0	0	0	330	330	330	330	330	330	330	330	330
coal	India	Asia	Southern Asia	Rihand power station	Unit 1			500	operating	1988		subcritical	bituminous					NTPC [100%]	NTPC [100.0%]	24.027	82.7915	exact	Rihandnagar	Dudhi	Sonbhadra	Uttar Pradesh	https://www.gem.wiki/Rihand_power_station	L100000102649	G100000108573	INE733E01010	1	3000		36	2028	2068	2108	500	500	500	500	500	500	500	500	500	500	500	500
coal	India	Asia	Southern Asia	Rihand power station	Unit 2			500	operating	1989		subcritical	bituminous					NTPC [100%]	NTPC [100.0%]	24.027	82.7915	exact	Rihandnagar	Dudhi	Sonbhadra	Uttar Pradesh	https://www.gem.wiki/Rihand_power_station	L100000102649	G100000108574	INE733E01010	1	3000		35	2029	2069	2109	500	500	500	500	500	500	500	500	500	500	500	500
coal	India	Asia	Southern Asia	Rihand power station	Unit 3			500	operating	2005		subcritical	bituminous					NTPC [100%]	NTPC [100.0%]	24.027	82.7915	exact	Rihandnagar	Dudhi	Sonbhadra	Uttar Pradesh	https://www.gem.wiki/Rihand_power_station	L100000102649	G100000108575	INE733E01010	1	3000		19	2045	2085	2125	500	500	500	500	500	500	500	500	500	500	500	500
coal	India	Asia	Southern Asia	Rihand power station	Unit 4			500	operating	2005		subcritical	bituminous					NTPC [100%]	NTPC [100.0%]	24.027	82.7915	exact	Rihandnagar	Dudhi	Sonbhadra	Uttar Pradesh	https://www.gem.wiki/Rihand_power_station	L100000102649	G100000108576	INE733E01010	1	3000		19	2045	2085	2125	500	500	500	500	500	500	500	500	500	500	500	500
coal	India	Asia	Southern Asia	Rihand power station	Unit 5			500	operating	2012		subcritical	bituminous					NTPC [100%]	NTPC [100.0%]	24.027	82.7915	exact	Rihandnegar	Dudhi	Sonebhadra	Uttar Pradesh	https://www.gem.wiki/Rihand_power_station	L100000102649	G100000108577	INE733E01010	1	3000		12	2052	2092	2132	500	500	500	500	500	500	500	500	500	500	500	500
coal	India	Asia	Southern Asia	Rihand power station	Unit 6			500	operating	2013		subcritical	bituminous					NTPC [100%]	NTPC [100.0%]	24.027	82.7915	exact	Rihandnegar	Dudhi	Sonebhadra	Uttar Pradesh	https://www.gem.wiki/Rihand_power_station	L100000102649	G100000108578	INE733E01010	1	3000	3000	11	2053	2093	2133	500	500	500	500	500	500	500	500	500	500	500	500
coal	India	Asia	Southern Asia	Rourkela Works-2 power station	Unit 1		Rourkela power station	60	operating	1987		subcritical	bituminous					NTPC-SAIL Power [100%]	NTPC Ltd [50.0%]; Steel Authority of India Ltd [50.0%]	22.221	84.8806	exact	SAIL Rourkela steel mill		Sundargarh	Odisha	https://www.gem.wiki/Rourkela_Works-2_power_station	L100000102494	G100000108643	INE733E01010	0.5	370		37	2027	2067	2107	30	30	30	30	30	30	30	30	30	30	30	30
coal	India	Asia	Southern Asia	Rourkela Works-2 power station	Unit 2		Rourkela power station	60	operating	1988		subcritical	bituminous					NTPC-SAIL Power [100%]	NTPC Ltd [50.0%]; Steel Authority of India Ltd [50.0%]	22.221	84.8806	exact	SAIL Rourkela steel mill		Sundargarh	Odisha	https://www.gem.wiki/Rourkela_Works-2_power_station	L100000102494	G100000108644	INE733E01010	0.5	370		36	2028	2068	2108	30	30	30	30	30	30	30	30	30	30	30	30
coal	India	Asia	Southern Asia	Rourkela Works-2 power station	Unit 3		Rourkela power station	250	operating	2022		subcritical	bituminous					NTPC-SAIL Power [100%]	NTPC Ltd [50.0%]; Steel Authority of India Ltd [50.0%]	22.221	84.8806	exact	SAIL Rourkela steel mill		Sundargarh	Odisha	https://www.gem.wiki/Rourkela_Works-2_power_station	L100000102494	G100000113412	INE733E01010	0.5	370	370	2	2062	2102	2142	0	0	125	125	125	125	125	125	125	125	125	125
coal	India	Asia	Southern Asia	Santaldih Thermal Power Station	Unit 5			250	operating	2007		subcritical	bituminous					NTPC [100%]	NTPC [100.0%]	23.6013	86.4666	exact	Santaldih	Ragunathpur	Purulia	West Bengal	https://www.gem.wiki/Santaldih_Thermal_Power_Station	L100000102686	G100000108812	INE733E01010	1	500		17	2047	2087	2127	250	250	250	250	250	250	250	250	250	250	250	250
coal	India	Asia	Southern Asia	Santaldih Thermal Power Station	Unit 6			250	operating	2011		subcritical	bituminous					NTPC [100%]	NTPC [100.0%]	23.6013	86.4666	exact	Santildih	Ragunathpur	Purulia	West Bengal	https://www.gem.wiki/Santaldih_Thermal_Power_Station	L100000102686	G100000108813	INE733E01010	1	500	500	13	2051	2091	2131	250	250	250	250	250	250	250	250	250	250	250	250
coal	India	Asia	Southern Asia	Simhadri power station	Unit 1			500	operating	2002		subcritical	bituminous					NTPC [100%]	NTPC [100.0%]	17.591	83.0917	exact			Visakhapatnam	Andhra Pradesh	https://www.gem.wiki/Simhadri_power_station	L100000102068	G100000109391	INE733E01010	1	2000		22	2042	2082	2122	500	500	500	500	500	500	500	500	500	500	500	500
coal	India	Asia	Southern Asia	Simhadri power station	Unit 2			500	operating	2002		subcritical	bituminous					NTPC [100%]	NTPC [100.0%]	17.591	83.0917	exact			Visakhapatnam	Andhra Pradesh	https://www.gem.wiki/Simhadri_power_station	L100000102068	G100000109392	INE733E01010	1	2000		22	2042	2082	2122	500	500	500	500	500	500	500	500	500	500	500	500
coal	India	Asia	Southern Asia	Simhadri power station	Unit 3			500	operating	2011		unknown	unknown					NTPC [100%]	NTPC [100.0%]	17.591	83.0917	exact	Vizag		Visakhapatnam	Andhra Pradesh	https://www.gem.wiki/Simhadri_power_station	L100000102068	G100000109393	INE733E01010	1	2000		13	2051	2091	2131	500	500	500	500	500	500	500	500	500	500	500	500
coal	India	Asia	Southern Asia	Simhadri power station	Unit 4			500	operating	2012		unknown	unknown					NTPC [100%]	NTPC [100.0%]	17.591	83.0917	exact	Vizag		Visakhapatnam	Andhra Pradesh	https://www.gem.wiki/Simhadri_power_station	L100000102068	G100000109394	INE733E01010	1	2000	2000	12	2052	2092	2132	500	500	500	500	500	500	500	500	500	500	500	500
coal	India	Asia	Southern Asia	Singrauli Super Thermal Power Station	Unit 1			200	operating	1982		subcritical	bituminous					NTPC [100%]	NTPC [100.0%]	24.1042	82.7064	exact	Shaktinagar	Dudhi	Sonbhadra	Uttar Pradesh	https://www.gem.wiki/Singrauli_Super_Thermal_Power_Station	L100000102652	G100000109413	INE733E01010	1	3600		42	2022	2062	2102	200	200	200	200	200	200	200	200	200	200	200	200
coal	India	Asia	Southern Asia	Singrauli Super Thermal Power Station	Unit 2			200	operating	1982		subcritical	bituminous					NTPC [100%]	NTPC [100.0%]	24.1042	82.7064	exact	Shaktinagar	Dudhi	Sonbhadra	Uttar Pradesh	https://www.gem.wiki/Singrauli_Super_Thermal_Power_Station	L100000102652	G100000109414	INE733E01010	1	3600		42	2022	2062	2102	200	200	200	200	200	200	200	200	200	200	200	200
coal	India	Asia	Southern Asia	Singrauli Super Thermal Power Station	Unit 3			200	operating	1983		subcritical	bituminous					NTPC [100%]	NTPC [100.0%]	24.1042	82.7064	exact	Shaktinagar	Dudhi	Sonbhadra	Uttar Pradesh	https://www.gem.wiki/Singrauli_Super_Thermal_Power_Station	L100000102652	G100000109415	INE733E01010	1	3600		41	2023	2063	2103	200	200	200	200	200	200	200	200	200	200	200	200
coal	India	Asia	Southern Asia	Singrauli Super Thermal Power Station	Unit 4			200	operating	1983		subcritical	bituminous					NTPC [100%]	NTPC [100.0%]	24.1042	82.7064	exact	Shaktinagar	Dudhi	Sonbhadra	Uttar Pradesh	https://www.gem.wiki/Singrauli_Super_Thermal_Power_Station	L100000102652	G100000109416	INE733E01010	1	3600		41	2023	2063	2103	200	200	200	200	200	200	200	200	200	200	200	200
coal	India	Asia	Southern Asia	Singrauli Super Thermal Power Station	Unit 5			200	operating	1984		subcritical	bituminous					NTPC [100%]	NTPC [100.0%]	24.1042	82.7064	exact	Shaktinagar	Dudhi	Sonbhadra	Uttar Pradesh	https://www.gem.wiki/Singrauli_Super_Thermal_Power_Station	L100000102652	G100000109417	INE733E01010	1	3600		40	2024	2064	2104	200	200	200	200	200	200	200	200	200	200	200	200
coal	India	Asia	Southern Asia	Singrauli Super Thermal Power Station	Unit 6			500	operating	1986		subcritical	bituminous					NTPC [100%]	NTPC [100.0%]	24.1042	82.7064	exact	Shaktinagar	Dudhi	Sonbhadra	Uttar Pradesh	https://www.gem.wiki/Singrauli_Super_Thermal_Power_Station	L100000102652	G100000109418	INE733E01010	1	3600		38	2026	2066	2106	500	500	500	500	500	500	500	500	500	500	500	500
coal	India	Asia	Southern Asia	Singrauli Super Thermal Power Station	Unit 7			500	operating	1987		subcritical	bituminous					NTPC [100%]	NTPC [100.0%]	24.1042	82.7064	exact	Shaktinagar	Dudhi	Sonbhadra	Uttar Pradesh	https://www.gem.wiki/Singrauli_Super_Thermal_Power_Station	L100000102652	G100000109419	INE733E01010	1	3600		37	2027	2067	2107	500	500	500	500	500	500	500	500	500	500	500	500
coal	India	Asia	Southern Asia	Singrauli Super Thermal Power Station	Unit 8			800	permitted			supercritical	unknown					NTPC [100%]	NTPC [100.0%]	24.1042	82.7064	exact			Sonebhadra	Uttar Pradesh	https://www.gem.wiki/Singrauli_Super_Thermal_Power_Station	L100000102652	G100000109420	INE733E01010	1	3600		-99	40	80	120	0	0	0	0	0	0	0	0	0	800	800	800
coal	India	Asia	Southern Asia	Singrauli Super Thermal Power Station	Unit 9			800	permitted			supercritical	unknown					NTPC [100%]	NTPC [100.0%]	24.1042	82.7064	exact			Sonebhadra	Uttar Pradesh	https://www.gem.wiki/Singrauli_Super_Thermal_Power_Station	L100000102652	G100000112789	INE733E01010	1	3600	3600	-99	40	80	120	0	0	0	0	0	0	0	0	0	800	800	800
coal	India	Asia	Southern Asia	Sipat power station	Unit 4		Rajiv Gandhi STPS power station	500	operating	2007		subcritical	unknown					NTPC [100%]	NTPC [100.0%]	22.1317	82.2904	exact	Sipat		Bilaspur	Chhattisgarh	https://www.gem.wiki/Sipat_power_station	L100000102185	G100000109453	INE733E01010	1	3780		17	2047	2087	2127	500	500	500	500	500	500	500	500	500	500	500	500
coal	India	Asia	Southern Asia	Sipat power station	Unit 5		Rajiv Gandhi STPS power station	500	operating	2008		subcritical	unknown					NTPC [100%]	NTPC [100.0%]	22.1317	82.2904	exact	Sipat		Bilaspur	Chhattisgarh	https://www.gem.wiki/Sipat_power_station	L100000102185	G100000109454	INE733E01010	1	3780		16	2048	2088	2128	500	500	500	500	500	500	500	500	500	500	500	500
coal	India	Asia	Southern Asia	Sipat power station	Unit 1		Rajiv Gandhi STPS power station	660	operating	2011		supercritical	unknown					NTPC [100%]	NTPC [100.0%]	22.1317	82.2904	exact	Sipat		Bilaspur	Chhattisgarh	https://www.gem.wiki/Sipat_power_station	L100000102185	G100000109450	INE733E01010	1	3780		13	2051	2091	2131	660	660	660	660	660	660	660	660	660	660	660	660
coal	India	Asia	Southern Asia	Sipat power station	Unit 2		Rajiv Gandhi STPS power station	660	operating	2011		supercritical	unknown					NTPC [100%]	NTPC [100.0%]	22.1317	82.2904	exact	Sipat		Bilaspur	Chhattisgarh	https://www.gem.wiki/Sipat_power_station	L100000102185	G100000109451	INE733E01010	1	3780		13	2051	2091	2131	660	660	660	660	660	660	660	660	660	660	660	660
coal	India	Asia	Southern Asia	Sipat power station	Unit 3		Rajiv Gandhi STPS power station	660	operating	2012		supercritical	unknown					NTPC [100%]	NTPC [100.0%]	22.1317	82.2904	exact	Sipat		Bilaspur	Chhattisgarh	https://www.gem.wiki/Sipat_power_station	L100000102185	G100000109452	INE733E01010	1	3780		12	2052	2092	2132	660	660	660	660	660	660	660	660	660	660	660	660
coal	India	Asia	Southern Asia	Sipat power station	Unit 6		Rajiv Gandhi STPS power station	800	pre-permit	2029		ultra-supercritical	unknown					NTPC [100%]	NTPC [100.0%]	22.1317	82.2904	exact	Sipat		Bilaspur	Chhattisgarh	https://www.gem.wiki/Sipat_power_station	L100000102185	G100000114226	INE733E01010	1	3780	3780	-5	2069	2109	2149	0	0	0	0	0	0	0	0	0	800	800	800
coal	India	Asia	Southern Asia	Solapur power station	Unit 1			660	operating	2017		supercritical	unknown					NTPC [100%]	NTPC [100.0%]	17.5513	75.9832	exact	Fatatewadi & Ahirwadi	South Solarpur	Solarpur	Maharashtra	https://www.gem.wiki/Solapur_power_station	L100000102431	G100000109490	INE733E01010	1	1320		7	2057	2097	2137	660	660	660	660	660	660	660	660	660	660	660	660
coal	India	Asia	Southern Asia	Solapur power station	Unit 2			660	operating	2019		supercritical	unknown					NTPC [100%]	NTPC [100.0%]	17.5513	75.9832	exact	Fatatewadi & Ahirwadi	South Solarpur	Solarpur	Maharashtra	https://www.gem.wiki/Solapur_power_station	L100000102431	G100000109491	INE733E01010	1	1320	1320	5	2059	2099	2139	660	660	660	660	660	660	660	660	660	660	660	660
coal	India	Asia	Southern Asia	Talcher Kaniha Super Thermal Power Station	Stage I Unit 1		Talcher STPS	500	operating	1995		subcritical	bituminous					NTPC [100%]	NTPC [100.0%]	21.0971	85.075	exact	Kaniha	Talcher	Angul	Odisha	https://www.gem.wiki/Talcher_Kaniha_Super_Thermal_Power_Station	L100000102502	G100000109879	INE733E01010	1	3000		29	2035	2075	2115	500	500	500	500	500	500	500	500	500	500	500	500
coal	India	Asia	Southern Asia	Talcher Kaniha Super Thermal Power Station	Stage I Unit 2		Talcher STPS	500	operating	1996		subcritical	bituminous					NTPC [100%]	NTPC [100.0%]	21.0971	85.075	exact	Kaniha	Talcher	Angul	Odisha	https://www.gem.wiki/Talcher_Kaniha_Super_Thermal_Power_Station	L100000102502	G100000109880	INE733E01010	1	3000		28	2036	2076	2116	500	500	500	500	500	500	500	500	500	500	500	500
coal	India	Asia	Southern Asia	Talcher Kaniha Super Thermal Power Station	Stage II Unit 3		Talcher STPS	500	operating	2003		subcritical	bituminous					NTPC [100%]	NTPC [100.0%]	21.0971	85.075	exact	Kaniha	Talcher	Angul	Odisha	https://www.gem.wiki/Talcher_Kaniha_Super_Thermal_Power_Station	L100000102502	G100000109881	INE733E01010	1	3000		21	2043	2083	2123	500	500	500	500	500	500	500	500	500	500	500	500
coal	India	Asia	Southern Asia	Talcher Kaniha Super Thermal Power Station	Stage II Unit 4		Talcher STPS	500	operating	2003		subcritical	bituminous					NTPC [100%]	NTPC [100.0%]	21.0971	85.075	exact	Kaniha	Talcher	Angul	Odisha	https://www.gem.wiki/Talcher_Kaniha_Super_Thermal_Power_Station	L100000102502	G100000109882	INE733E01010	1	3000		21	2043	2083	2123	500	500	500	500	500	500	500	500	500	500	500	500
coal	India	Asia	Southern Asia	Talcher Kaniha Super Thermal Power Station	Stage II Unit 5		Talcher STPS	500	operating	2005		subcritical	bituminous					NTPC [100%]	NTPC [100.0%]	21.0971	85.075	exact	Kaniha	Talcher	Angul	Odisha	https://www.gem.wiki/Talcher_Kaniha_Super_Thermal_Power_Station	L100000102502	G100000109883	INE733E01010	1	3000		19	2045	2085	2125	500	500	500	500	500	500	500	500	500	500	500	500
coal	India	Asia	Southern Asia	Talcher Kaniha Super Thermal Power Station	Stage II Unit 6		Talcher STPS	500	operating	2006		subcritical	bituminous					NTPC [100%]	NTPC [100.0%]	21.0971	85.075	exact	Kaniha	Talcher	Angul	Odisha	https://www.gem.wiki/Talcher_Kaniha_Super_Thermal_Power_Station	L100000102502	G100000109884	INE733E01010	1	3000	3000	18	2046	2086	2126	500	500	500	500	500	500	500	500	500	500	500	500
coal	India	Asia	Southern Asia	Talcher power station	Unit A1		Talcher-A power station Unit 1 (Unit A1), Talcher-A power station Unit 2 (Unit A2), Talcher-A power station Unit 3 (Unit A3), Talcher-A power station Unit 4 (Unit A4), Talcher-B power station Unit 1 (Unit B5), Talcher-B power station Unit 2 (Unit B6)	60	retired	1967	2021	subcritical	bituminous					NTPC [100%]	NTPC [100.0%]	20.9111	85.2072	exact	Digi	Talcher	Angul	Odisha	https://www.gem.wiki/Talcher_power_station	L100000102504	G100000109889	INE733E01010	1	1780		57	2007	2047	2087	60	0	0	0	0	0	0	0	0	0	0	0
coal	India	Asia	Southern Asia	Talcher power station	Unit A2		Talcher-A power station Unit 1 (Unit A1), Talcher-A power station Unit 2 (Unit A2), Talcher-A power station Unit 3 (Unit A3), Talcher-A power station Unit 4 (Unit A4), Talcher-B power station Unit 1 (Unit B5), Talcher-B power station Unit 2 (Unit B6)	60	retired	1968	2021	subcritical	bituminous					NTPC [100%]	NTPC [100.0%]	20.9111	85.2072	exact	Digi	Talcher	Angul	Odisha	https://www.gem.wiki/Talcher_power_station	L100000102504	G100000109890	INE733E01010	1	1780		56	2008	2048	2088	60	0	0	0	0	0	0	0	0	0	0	0
coal	India	Asia	Southern Asia	Talcher power station	Unit A3		Talcher-A power station Unit 1 (Unit A1), Talcher-A power station Unit 2 (Unit A2), Talcher-A power station Unit 3 (Unit A3), Talcher-A power station Unit 4 (Unit A4), Talcher-B power station Unit 1 (Unit B5), Talcher-B power station Unit 2 (Unit B6)	60	retired	1968	2021	subcritical	bituminous					NTPC [100%]	NTPC [100.0%]	20.9111	85.2072	exact	Digi	Talcher	Angul	Odisha	https://www.gem.wiki/Talcher_power_station	L100000102504	G100000109891	INE733E01010	1	1780		56	2008	2048	2088	60	0	0	0	0	0	0	0	0	0	0	0
coal	India	Asia	Southern Asia	Talcher power station	Unit A4		Talcher-A power station Unit 1 (Unit A1), Talcher-A power station Unit 2 (Unit A2), Talcher-A power station Unit 3 (Unit A3), Talcher-A power station Unit 4 (Unit A4), Talcher-B power station Unit 1 (Unit B5), Talcher-B power station Unit 2 (Unit B6)	60	retired	1969	2021	subcritical	bituminous					NTPC [100%]	NTPC [100.0%]	20.9111	85.2072	exact	Digi	Talcher	Angul	Odisha	https://www.gem.wiki/Talcher_power_station	L100000102504	G100000109892	INE733E01010	1	1780		55	2009	2049	2089	60	0	0	0	0	0	0	0	0	0	0	0
coal	India	Asia	Southern Asia	Talcher power station	Unit B5		Talcher-A power station Unit 1 (Unit A1), Talcher-A power station Unit 2 (Unit A2), Talcher-A power station Unit 3 (Unit A3), Talcher-A power station Unit 4 (Unit A4), Talcher-B power station Unit 1 (Unit B5), Talcher-B power station Unit 2 (Unit B6)	110	retired	1982	2021	subcritical	bituminous					NTPC [100%]	NTPC [100.0%]	20.9111	85.2072	exact	Digi	Talcher	Angul	Odisha	https://www.gem.wiki/Talcher_power_station	L100000102504	G100000109893	INE733E01010	1	1780		42	2022	2062	2102	110	0	0	0	0	0	0	0	0	0	0	0
coal	India	Asia	Southern Asia	Talcher power station	Unit B6		Talcher-A power station Unit 1 (Unit A1), Talcher-A power station Unit 2 (Unit A2), Talcher-A power station Unit 3 (Unit A3), Talcher-A power station Unit 4 (Unit A4), Talcher-B power station Unit 1 (Unit B5), Talcher-B power station Unit 2 (Unit B6)	110	retired	1983	2021	subcritical	bituminous					NTPC [100%]	NTPC [100.0%]	20.9111	85.2072	exact	Digi	Talcher	Angul	Odisha	https://www.gem.wiki/Talcher_power_station	L100000102504	G100000109894	INE733E01010	1	1780		41	2023	2063	2103	110	0	0	0	0	0	0	0	0	0	0	0
coal	India	Asia	Southern Asia	Talcher power station	Stage III Unit 1		Talcher-A power station Unit 1 (Unit A1), Talcher-A power station Unit 2 (Unit A2), Talcher-A power station Unit 3 (Unit A3), Talcher-A power station Unit 4 (Unit A4), Talcher-B power station Unit 1 (Unit B5), Talcher-B power station Unit 2 (Unit B6)	660	construction	2026		ultra-supercritical	bituminous					NTPC [100%]	NTPC [100.0%]	20.9111	85.2072	exact	Kaniha		Angul	Odisha	https://www.gem.wiki/Talcher_power_station	L100000102504	G100000109887	INE733E01010	1	1780		-2	2066	2106	2146	0	0	0	0	0	0	660	660	660	660	660	660
coal	India	Asia	Southern Asia	Talcher power station	Stage III Unit 2		Talcher-A power station Unit 1 (Unit A1), Talcher-A power station Unit 2 (Unit A2), Talcher-A power station Unit 3 (Unit A3), Talcher-A power station Unit 4 (Unit A4), Talcher-B power station Unit 1 (Unit B5), Talcher-B power station Unit 2 (Unit B6)	660	construction	2027		ultra-supercritical	bituminous					NTPC [100%]	NTPC [100.0%]	20.9111	85.2072	exact	Kaniha		Angul	Odisha	https://www.gem.wiki/Talcher_power_station	L100000102504	G100000109888	INE733E01010	1	1780	1780	-3	2067	2107	2147	0	0	0	0	0	0	0	660	660	660	660	660
coal	India	Asia	Southern Asia	Tanda power station	Unit 1			110	operating	1988		subcritical	bituminous					NTPC [100%]	NTPC [100.0%]	26.5895	82.6012	exact	Bahadurgarh	Tanda	Ambedkarnagar	Uttar Pradesh	https://www.gem.wiki/Tanda_power_station	L100000102653	G100000109926	INE733E01010	1	1760		36	2028	2068	2108	110	110	110	110	110	110	110	110	110	110	110	110
coal	India	Asia	Southern Asia	Tanda power station	Unit 2			110	operating	1989		subcritical	bituminous					NTPC [100%]	NTPC [100.0%]	26.5895	82.6012	exact	Bahadurgarh	Tanda	Ambedkarnagar	Uttar Pradesh	https://www.gem.wiki/Tanda_power_station	L100000102653	G100000109927	INE733E01010	1	1760		35	2029	2069	2109	110	110	110	110	110	110	110	110	110	110	110	110
coal	India	Asia	Southern Asia	Tanda power station	Unit 3			110	operating	1990		subcritical	bituminous					NTPC [100%]	NTPC [100.0%]	26.5895	82.6012	exact	Bahadurgarh	Tanda	Ambedkarnagar	Uttar Pradesh	https://www.gem.wiki/Tanda_power_station	L100000102653	G100000109928	INE733E01010	1	1760		34	2030	2070	2110	110	110	110	110	110	110	110	110	110	110	110	110
coal	India	Asia	Southern Asia	Tanda power station	Unit 4			110	operating	1998		subcritical	bituminous					NTPC [100%]	NTPC [100.0%]	26.5895	82.6012	exact	Bahadurgarh	Tanda	Ambedkarnagar	Uttar Pradesh	https://www.gem.wiki/Tanda_power_station	L100000102653	G100000109929	INE733E01010	1	1760		26	2038	2078	2118	110	110	110	110	110	110	110	110	110	110	110	110
coal	India	Asia	Southern Asia	Tanda power station	Unit 5			660	operating	2019		supercritical	unknown					NTPC [100%]	NTPC [100.0%]	26.5892	82.6004	exact	Bahadurgarh	Tanda	Ambedkarnagar	Uttar Pradesh	https://www.gem.wiki/Tanda_power_station	L100000102653	G100000109924	INE733E01010	1	1760		5	2059	2099	2139	660	660	660	660	660	660	660	660	660	660	660	660
coal	India	Asia	Southern Asia	Tanda power station	Unit 6			660	operating	2021		supercritical	unknown					NTPC [100%]	NTPC [100.0%]	26.5892	82.6004	exact	Bahadurgarh	Tanda	Ambedkarnagar	Uttar Pradesh	https://www.gem.wiki/Tanda_power_station	L100000102653	G100000109925	INE733E01010	1	1760	1760	3	2061	2101	2141	0	660	660	660	660	660	660	660	660	660	660	660
coal	India	Asia	Southern Asia	Vallur Thermal Power Plant	Unit 1			500	operating	2012		subcritical	unknown					NTPC Tamil Nadu Energy [100%]	NTPC Ltd [50.0%]; TNEB Ltd	13.2371	80.3018	exact	Vallur	Ponneri	Thiruvallur	Tamil Nadu	https://www.gem.wiki/Vallur_Thermal_Power_Plant	L100000102590	G100000110544	INE733E01010	0.5	1500		12	2052	2092	2132	250	250	250	250	250	250	250	250	250	250	250	250
coal	India	Asia	Southern Asia	Vallur Thermal Power Plant	Unit 2			500	operating	2013		subcritical	unknown					NTPC Tamil Nadu Energy [100%]	NTPC Ltd [50.0%]; TNEB Ltd	13.2371	80.3018	exact	Vallur	Ponneri	Thiruvallur	Tamil Nadu	https://www.gem.wiki/Vallur_Thermal_Power_Plant	L100000102590	G100000110545	INE733E01010	0.5	1500		11	2053	2093	2133	250	250	250	250	250	250	250	250	250	250	250	250
coal	India	Asia	Southern Asia	Vallur Thermal Power Plant	Unit 3			500	operating	2014		subcritical	unknown					NTPC Tamil Nadu Energy [100%]	NTPC Ltd [50.0%]; TNEB Ltd	13.2371	80.3018	exact	Vallur	Ponneri	Thiruvallur	Tamil Nadu	https://www.gem.wiki/Vallur_Thermal_Power_Plant	L100000102590	G100000110546	INE733E01010	0.5	1500	1500	10	2054	2094	2134	250	250	250	250	250	250	250	250	250	250	250	250
coal	India	Asia	Southern Asia	Vindhyachal power station	Phase 1 Unit 1			210	operating	1987		subcritical	bituminous					NTPC [100%]	NTPC [100.0%]	24.0983	82.6719	exact	Waidhan	Singrauli	Singrauli	Madhya Pradesh	https://www.gem.wiki/Vindhyachal_power_station	L100000102371	G100000110598	INE733E01010	1	4760		37	2027	2067	2107	210	210	210	210	210	210	210	210	210	210	210	210
coal	India	Asia	Southern Asia	Vindhyachal power station	Phase 1 Unit 2			210	operating	1988		subcritical	bituminous					NTPC [100%]	NTPC [100.0%]	24.0983	82.6719	exact	Waidhan	Singrauli	Singrauli	Madhya Pradesh	https://www.gem.wiki/Vindhyachal_power_station	L100000102371	G100000110599	INE733E01010	1	4760		36	2028	2068	2108	210	210	210	210	210	210	210	210	210	210	210	210
coal	India	Asia	Southern Asia	Vindhyachal power station	Phase 1 Unit 3			210	operating	1989		subcritical	bituminous					NTPC [100%]	NTPC [100.0%]	24.0983	82.6719	exact	Waidhan	Singrauli	Singrauli	Madhya Pradesh	https://www.gem.wiki/Vindhyachal_power_station	L100000102371	G100000110600	INE733E01010	1	4760		35	2029	2069	2109	210	210	210	210	210	210	210	210	210	210	210	210
coal	India	Asia	Southern Asia	Vindhyachal power station	Phase 1 Unit 4			210	operating	1989		subcritical	bituminous					NTPC [100%]	NTPC [100.0%]	24.0983	82.6719	exact	Waidhan	Singrauli	Singrauli	Madhya Pradesh	https://www.gem.wiki/Vindhyachal_power_station	L100000102371	G100000110601	INE733E01010	1	4760		35	2029	2069	2109	210	210	210	210	210	210	210	210	210	210	210	210
coal	India	Asia	Southern Asia	Vindhyachal power station	Phase 1 Unit 5			210	operating	1990		subcritical	bituminous					NTPC [100%]	NTPC [100.0%]	24.0983	82.6719	exact	Waidhan	Singrauli	Singrauli	Madhya Pradesh	https://www.gem.wiki/Vindhyachal_power_station	L100000102371	G100000110602	INE733E01010	1	4760		34	2030	2070	2110	210	210	210	210	210	210	210	210	210	210	210	210
coal	India	Asia	Southern Asia	Vindhyachal power station	Phase 1 Unit 6			210	operating	1991		subcritical	bituminous					NTPC [100%]	NTPC [100.0%]	24.0983	82.6719	exact	Waidhan	Singrauli	Singrauli	Madhya Pradesh	https://www.gem.wiki/Vindhyachal_power_station	L100000102371	G100000110603	INE733E01010	1	4760		33	2031	2071	2111	210	210	210	210	210	210	210	210	210	210	210	210
coal	India	Asia	Southern Asia	Vindhyachal power station	Phase 2 Unit 1			500	operating	1999		subcritical	bituminous					NTPC [100%]	NTPC [100.0%]	24.0983	82.6719	exact	Waidhan	Singrauli	Singrauli	Madhya Pradesh	https://www.gem.wiki/Vindhyachal_power_station	L100000102371	G100000110604	INE733E01010	1	4760		25	2039	2079	2119	500	500	500	500	500	500	500	500	500	500	500	500
coal	India	Asia	Southern Asia	Vindhyachal power station	Phase 2 Unit 2			500	operating	2000		subcritical	bituminous					NTPC [100%]	NTPC [100.0%]	24.0983	82.6719	exact	Waidhan	Singrauli	Singrauli	Madhya Pradesh	https://www.gem.wiki/Vindhyachal_power_station	L100000102371	G100000110605	INE733E01010	1	4760		24	2040	2080	2120	500	500	500	500	500	500	500	500	500	500	500	500
coal	India	Asia	Southern Asia	Vindhyachal power station	Phase 3 Unit 1			500	operating	2006		subcritical	bituminous					NTPC [100%]	NTPC [100.0%]	24.0983	82.6719	exact	Waidhan	Singrauli	Singrauli	Madhya Pradesh	https://www.gem.wiki/Vindhyachal_power_station	L100000102371	G100000110606	INE733E01010	1	4760		18	2046	2086	2126	500	500	500	500	500	500	500	500	500	500	500	500
coal	India	Asia	Southern Asia	Vindhyachal power station	Phase 3 Unit 2			500	operating	2007		subcritical	bituminous					NTPC [100%]	NTPC [100.0%]	24.0983	82.6719	exact	Waidhan	Singrauli	Singrauli	Madhya Pradesh	https://www.gem.wiki/Vindhyachal_power_station	L100000102371	G100000110607	INE733E01010	1	4760		17	2047	2087	2127	500	500	500	500	500	500	500	500	500	500	500	500
coal	India	Asia	Southern Asia	Vindhyachal power station	Phase IV unit 11			500	operating	2012		subcritical	bituminous					NTPC [100%]	NTPC [100.0%]	24.0983	82.6719	exact	Waidhan	Waidhan	Singrauli	Madhya Pradesh	https://www.gem.wiki/Vindhyachal_power_station	L100000102371	G100000110608	INE733E01010	1	4760		12	2052	2092	2132	500	500	500	500	500	500	500	500	500	500	500	500
coal	India	Asia	Southern Asia	Vindhyachal power station	Phase IV units 12			500	operating	2013		subcritical	bituminous					NTPC [100%]	NTPC [100.0%]	24.0983	82.6719	exact	Waidhan	Waidhan	Singrauli	Madhya Pradesh	https://www.gem.wiki/Vindhyachal_power_station	L100000102371	G100000110609	INE733E01010	1	4760		11	2053	2093	2133	500	500	500	500	500	500	500	500	500	500	500	500
coal	India	Asia	Southern Asia	Vindhyachal power station	Phase V Unit 13			500	operating	2015		subcritical	bituminous					NTPC [100%]	NTPC [100.0%]	24.0983	82.6719	exact	Waidhan	Waidhan	Singrauli	Madhya Pradesh	https://www.gem.wiki/Vindhyachal_power_station	L100000102371	G100000110610	INE733E01010	1	4760	4760	9	2055	2095	2135	500	500	500	500	500	500	500	500	500	500	500	500
oil/gas	India	Asia	Southern Asia	Anta power plant	1-4		Anta Thermal power station	419.33	operating	1989		CC	NG					NTPC Ltd [100.0%]	NTPC Ltd [100.0%]	25.1797	76.3188	exact	Anta			Rajasthan	https://www.gem.wiki/Anta_power_plant	L100000401464	G100000401434	INE733E01010	1	419.33	419.33	35	2029	2069	2109	419.33	419.33	419.33	419.33	419.33	419.33	419.33	419.33	419.33	419.33	419.33	419.33
oil/gas	India	Asia	Southern Asia	Auraiya Combined Cycle power plant	1-6			663	operating	1990		CC	NG					NTPC Ltd [100.0%]	NTPC Ltd [100.0%]	26.6282	79.5286	exact	Auraiya			Uttar Pradesh	https://www.gem.wiki/Auraiya_Combined_Cycle_power_plant	L100000401466	G100000401436	INE733E01010	1	663	663	34	2030	2070	2110	663	663	663	663	663	663	663	663	663	663	663	663
oil/gas	India	Asia	Southern Asia	Dadri Combined Cycle power plant	1-6			829.78	operating	1994		CC	NG/D					NTPC Ltd [100.0%]	NTPC Ltd [100.0%]	28.5932	77.6101	exact	Gautam Budh Nagar			Uttar Pradesh	https://www.gem.wiki/Dadri_Combined_Cycle_power_plant	L100000401465	G100000401435	INE733E01010	1	829.78	829.78	30	2034	2074	2114	829.78	829.78	829.78	829.78	829.78	829.78	829.78	829.78	829.78	829.78	829.78	829.78
oil/gas	India	Asia	Southern Asia	Faridabad Combined Cycle power plant	1-3			431.59	operating	2000		CC	NG/N/D					NTPC Ltd [100.0%]	NTPC Ltd [100.0%]	28.3465	77.359	exact	Faridabad District			Haryana	https://www.gem.wiki/Faridabad_Combined_Cycle_power_plant	L100000401463	G100000401433	INE733E01010	1	431.59	431.59	24	2040	2080	2120	431.59	431.59	431.59	431.59	431.59	431.59	431.59	431.59	431.59	431.59	431.59	431.59
oil/gas	India	Asia	Southern Asia	Hope Town power station	1			50	announced			not found	LNG/D					NTPC Ltd [100.0%]	NTPC Ltd [100.0%]	11.7061	92.7368	approximate	Ferrargunj Tehsil		South Andaman district	Andaman & Nicobar Is	https://www.gem.wiki/Hope_Town_power_station	L100000408394	G100000411776	INE733E01010	1	50	50	-99	40	80	120	0	0	0	0	0	0	0	0	0	50	50	50
oil/gas	India	Asia	Southern Asia	Jhanor Gandhar Combined Cycle power plant	1-4			657	operating	1995		CC	NG					NTPC Ltd [100.0%]	NTPC Ltd [100.0%]	21.8242	73.1136	exact	Bharuch			Gujarat	https://www.gem.wiki/Jhanor_Gandhar_Combined_Cycle_power_plant	L100000401489	G100000401459	INE733E01010	1	657	657	29	2035	2075	2115	657	657	657	657	657	657	657	657	657	657	657	657
oil/gas	India	Asia	Southern Asia	Kawas Combined Cycle power plant	1-6			656	operating	1993		CC	NG					NTPC Ltd [100.0%]	NTPC Ltd [100.0%]	21.175	72.6879	exact	Surat			Gujarat	https://www.gem.wiki/Kawas_Combined_Cycle_power_plant	L100000401490	G100000401460	INE733E01010	1	656	656	31	2033	2073	2113	656	656	656	656	656	656	656	656	656	656	656	656
oil/gas	India	Asia	Southern Asia	Kayamkulam Gas power plant	1		Rajiv Gandhi CCPP	350	operating	1999		CC	NG/N					NTPC Ltd [100.0%]	NTPC Ltd [100.0%]	9.2072	76.4342	approximate	Kayamkulam - Alappuzha Dist			Kerala	https://www.gem.wiki/Kayamkulam_Gas_power_plant	L100000407598	G100000409915	INE733E01010	1	350	350	25	2039	2079	2119	350	350	350	350	350	350	350	350	350	350	350	350
hydropower	India	Asia	Southern Asia	Koldam hydroelectric plant				800	operating	2015		conventional storage				TRUE	FALSE	NTPC LTD		31.3822	76.8765	exact		Sundarnagar	Mandi	Himachal Pradesh	https://gem.wiki/Koldam_hydroelectric_plant	L601917	G601937	INE733E01010	1	800	800	9	2055	2095	2135	800	800	800	800	800	800	800	800	800	800	800	800
hydropower	India	Asia	Southern Asia	Lata Tapovan hydroelectric plant				171	mothballed			run-of-river				TRUE	FALSE	NTPC LTD		30.0798	78.3046	approximate			Chamoli district	Uttarakhand	https://gem.wiki/Lata_Tapovan_hydroelectric_plant	L601940	G604545	INE733E01010	1	171	171	-99	40	80	120	0	0	0	0	0	0	0	0	0	0	0	0
hydropower	India	Asia	Southern Asia	Miyar hydroelectric plant				120	shelved			run-of-river				TRUE	FALSE	NTPC LTD		31.8168	77.3493	approximate			Lahaul and Spiti district	Himachal Pradesh	https://gem.wiki/Miyar_hydroelectric_plant	L601966	G601986	INE733E01010	1	120		-99	40	80	120	0	0	0	0	0	0	0	0	0	0	0	0
hydropower	India	Asia	Southern Asia	Rammam-III hydroelectric plant				120	construction			run-of-river				TRUE	FALSE	NTPC LTD		27.1236	88.2222	exact	Darjeeling	Darjeeling Pulbazar	Darjeeling district	West Bengal	https://gem.wiki/Rammam-III_hydroelectric_plant	L602007	G602027	INE733E01010	1	120	120	-99	40	80	120	0	0	0	0	0	0	0	120	120	120	120	120
hydropower	India	Asia	Southern Asia	Seli hydroelectric plant				400	shelved			run-of-river				TRUE	FALSE	NTPC LTD		31.8168	77.3493	approximate			Lahaul and Spiti district	Himachal Pradesh	https://gem.wiki/Seli_hydroelectric_plant	L602029	G602049	INE733E01010	1	400	400	-99	40	80	120	0	0	0	0	0	0	0	0	0	0	0	0
hydropower	India	Asia	Southern Asia	Tapovan Vishnugad hydroelectric plant				520	construction	2024		run-of-river				TRUE	FALSE	NTPC LTD		30.5355	79.5195	exact		Joshimath Tehsil	Chamoli district	Uttarakhand	https://gem.wiki/Tapovan_Vishnugad_hydroelectric_plant	L602054	G602075	INE733E01010	1	520	520	0	2064	2104	2144	0	0	0	0	520	520	520	520	520	520	520	520
solar	India	Asia	Southern Asia	Amreshwar solar farm				200	pre-construction			PV						NTPC LTD		22.5415	73.4334	approximate		Amreshwar		Gujarat	https://gem.wiki/Amreshwar_solar_farm	L800586	G800698	INE733E01010	1	200	200	-99	40	80	120	0	0	0	0	0	0	0	0	0	200	200	200
solar	India	Asia	Southern Asia	Ananthapuram solar farm			Np Kunta Umspp	250	operating	2016		PV						NTPC LTD		13.1673	79.2128	approximate		Ananthapuram		Andhra Pradesh	https://gem.wiki/Ananthapuram_solar_farm	L800587	G800699	INE733E01010	1	250	250	8	2056	2096	2136	250	250	250	250	250	250	250	250	250	250	250	250
solar	India	Asia	Southern Asia	Anta solar farm			Anta Solar	90	pre-construction			PV						NTPC LTD		25.7717	71.0931	approximate		Anta	Baran	Rajasthan	https://gem.wiki/Anta_solar_farm	L800588	G800700	INE733E01010	1	90	90	-99	40	80	120	0	0	0	0	0	0	0	0	0	90	90	90
solar	India	Asia	Southern Asia	Auraiya I solar farm				20	operating	2022		PV						NTPC LTD		26.632	79.533	exact		Auraiya		Uttar Pradesh	https://gem.wiki/Auraiya_I_solar_farm	L800589	G800701	INE733E01010	1	20		2	2062	2102	2142	0	0	20	20	20	20	20	20	20	20	20	20
solar	India	Asia	Southern Asia	Auraiya II solar farm			Auraiya floating solar farm	20	operating	2022		PV						NTPC LTD		26.634	79.5279	exact		Auraiya		Uttar Pradesh	https://gem.wiki/Auraiya_II_solar_farm	L800590	G800702	INE733E01010	1	20	20	2	2062	2102	2142	0	0	20	20	20	20	20	20	20	20	20	20
solar	India	Asia	Southern Asia	Bhadla (NTPC) solar farm				625	pre-construction			PV						NTPC LTD		27.5182	71.9306	approximate		Bhadla	Jodhpur	Rajasthan	https://gem.wiki/Bhadla_(NTPC)_solar_farm	L829495	G833285	INE733E01010	1	625	625	-99	40	80	120	0	0	0	0	0	0	0	0	0	625	625	625
solar	India	Asia	Southern Asia	Bhadla (NTPC) Solar Park				260	operating	2017		PV						NTPC LTD		27.488	71.981	exact	Bhadla		Jodhpur	Rajasthan	https://gem.wiki/Bhadla_(NTPC)_Solar_Park	L800591	G800703	INE733E01010	1	260	260	7	2057	2097	2137	260	260	260	260	260	260	260	260	260	260	260	260
solar	India	Asia	Southern Asia	Bhensada solar farm			JFPc} NTPC Tata	320	pre-construction			PV						NTPC LTD		25.1862	75.8589	approximate		Bhensada		Rajasthan	https://gem.wiki/Bhensada_solar_farm	L800592	G800704	INE733E01010	1	320	320	-99	40	80	120	0	0	0	0	0	0	0	0	0	320	320	320
solar	India	Asia	Southern Asia	Bilhaur solar farm				225	operating	2021		PV						NTPC LTD		26.756	80.072	exact		Bilhaur		Uttar Pradesh	https://gem.wiki/Bilhaur_solar_farm	L800593	G800705	INE733E01010	1	225	225	3	2061	2101	2141	0	225	225	225	225	225	225	225	225	225	225	225
solar	India	Asia	Southern Asia	Chhattargarh solar farm				150	pre-construction			PV						NTPC LTD		25.1862	75.8589	approximate		Chhattargarh		Rajasthan	https://gem.wiki/Chhattargarh_solar_farm	L800594	G800706	INE733E01010	1	150	150	-99	40	80	120	0	0	0	0	0	0	0	0	0	150	150	150
solar	Cuba	Americas	Latin America and the Caribbean	Cumbre (NTPC) solar farm		Parque Solar Cumbre (NTPC)		25	pre-construction			PV						Union Electrica de Cuba [50%]; NTPC Renewable Energy LTD [50%]		22.3115	-79.6668	approximate				Villa Clara	https://gem.wiki/Cumbre_(NTPC)_solar_farm	L832414	G837966	INE733E01010	0.5	25	25	-99	40	80	120	0	0	0	0	0	0	0	0	0	25	25	25
solar	India	Asia	Southern Asia	Devikot solar farm			JFPc} NTPC Hild	240	operating	2022		PV						NTPC LTD		26.6849	71.2351	approximate		Devikot		Rajasthan	https://gem.wiki/Devikot_solar_farm	L800595	G800707	INE733E01010	1	240	240	2	2062	2102	2142	0	0	240	240	240	240	240	240	240	240	240	240
solar	India	Asia	Southern Asia	Ettayapuram solar farm				230	operating	2022		PV						NTPC LTD		9.1806	78.0231	approximate		Ettayapuram		Tamil Nadu	https://gem.wiki/Ettayapuram_solar_farm	L800758	G800881	INE733E01010	1	230	230	2	2062	2102	2142	0	0	230	230	230	230	230	230	230	230	230	230
solar	India	Asia	Southern Asia	Fatehgarh solar farm	1			50	operating	2022		PV						NTPC LTD		25.5377	75.3612	approximate		Fatehgarh	Jaisalmer	Rajasthan	https://gem.wiki/Fatehgarh_solar_farm	L808861	G811154	INE733E01010	1	296		2	2062	2102	2142	0	0	50	50	50	50	50	50	50	50	50	50
solar	India	Asia	Southern Asia	Fatehgarh solar farm	2			246	operating	2022		PV						NTPC LTD		25.5377	75.3612	approximate		Fatehgarh	Jaisalmer	Rajasthan	https://gem.wiki/Fatehgarh_solar_farm	L808861	G811155	INE733E01010	1	296	296	2	2062	2102	2142	0	0	246	246	246	246	246	246	246	246	246	246
solar	India	Asia	Southern Asia	Gujarat GUVNL XI (NTPC) solar farm				200	pre-construction			PV						NTPC LTD		22.3376	71.7211	approximate				Gujarat	https://gem.wiki/Gujarat_GUVNL_XI_(NTPC)_solar_farm	L808867	G811161	INE733E01010	1	200	200	-99	40	80	120	0	0	0	0	0	0	0	0	0	200	200	200
solar	India	Asia	Southern Asia	Jetsar solar farm			Jetsar Solar	160	operating	2022		PV						NTPC LTD		9.0128	76.9144	approximate		Jetsar		Rajasthan	https://gem.wiki/Jetsar_solar_farm	L800598	G800710	INE733E01010	1	160	160	2	2062	2102	2142	0	0	160	160	160	160	160	160	160	160	160	160
solar	India	Asia	Southern Asia	Jhanor Gandhar solar farm			Gandhar Solar PV farm	20	operating	2022		PV						NTPC LTD		21.8243	73.1137	approximate		Jhanor Gandhar		Gujarat	https://gem.wiki/Jhanor_Gandhar_solar_farm	L800599	G800711	INE733E01010	1	20	20	2	2062	2102	2142	0	0	20	20	20	20	20	20	20	20	20	20
solar	India	Asia	Southern Asia	Kawas solar farm			Kawas Solar	56	operating			PV						NTPC LTD		21.175	72.684	exact		Kawas		Gujarat	https://gem.wiki/Kawas_solar_farm	L800600	G800712	INE733E01010	1	56	56	-99	40	80	120	56	56	56	56	56	56	56	56	56	56	56	56
solar	India	Asia	Southern Asia	Kayamkulam solar farm			Kayamkulam Floating	102	operating	2022		PV						NTPC LTD		9.1697	76.501	approximate		Kayamkulam		Kerala	https://gem.wiki/Kayamkulam_solar_farm	L800601	G800713	INE733E01010	1	102	102	2	2062	2102	2142	0	0	102	102	102	102	102	102	102	102	102	102
solar	India	Asia	Southern Asia	Kutch (NTPC) Solar Park				4750	pre-construction			Assumed PV						NTPC LTD		23.8245	69.7298	approximate	Khavada		Kutch	Gujarat	https://gem.wiki/Kutch_(NTPC)_Solar_Park	L800602	G800714	INE733E01010	1	4750	4750	-99	40	80	120	0	0	0	0	0	0	0	0	0	4750	4750	4750
solar	Cuba	Americas	Latin America and the Caribbean	La Distancia (NTPC) solar farm		Parque Soalr La Distancia (NTPC)		10	pre-construction			PV						Union Electrica de Cuba [50%]; NTPC Renewable Energy LTD [50%]		22.6407	-80.046	approximate				Villa Clara	https://gem.wiki/La_Distancia_(NTPC)_solar_farm	L832415	G837967	INE733E01010	0.5	10	10	-99	40	80	120	0	0	0	0	0	0	0	0	0	10	10	10
solar	Cuba	Americas	Latin America and the Caribbean	La Paloma (NTPC) solar farm		Parque Solar La Paloma (NTPC)		5	pre-construction			PV						Union Electrica de Cuba [50%]; NTPC Renewable Energy LTD [50%]		22.9846	-80.5867	approximate				Villa Clara	https://gem.wiki/La_Paloma_(NTPC)_solar_farm	L832416	G837968	INE733E01010	0.5	5	5	-99	40	80	120	0	0	0	0	0	0	0	0	0	5	5	5
solar	Cuba	Americas	Latin America and the Caribbean	Macún (NTPC) solar farm		Parque Solar Macún (NTPC)		10	pre-construction			PV						Union Electrica de Cuba [50%]; NTPC Renewable Energy LTD [50%]		22.7987	-80.0776	approximate	Sagua La Grande			Villa Clara	https://gem.wiki/Macún_(NTPC)_solar_farm	L832418	G837970	INE733E01010	0.5	10	10	-99	40	80	120	0	0	0	0	0	0	0	0	0	10	10	10
solar	India	Asia	Southern Asia	Mandsaur (NTPC) solar farm				250	operating	2017		PV						NTPC LTD		24.088	75.799	exact		Mandsaur		Madhya Pradesh	https://gem.wiki/Mandsaur_(NTPC)_solar_farm	L800603	G800715	INE733E01010	1	250	250	7	2057	2097	2137	250	250	250	250	250	250	250	250	250	250	250	250
solar	Cuba	Americas	Latin America and the Caribbean	Minidustria 2 (NTPC) solar farm		Parque Solar Minidustria 2 (NTPC)		5	pre-construction			PV						Union Electrica de Cuba [50%]; NTPC Renewable Energy LTD [50%]		22.435	-79.9326	approximate	Santa Clara			Villa Clara	https://gem.wiki/Minidustria_2_(NTPC)_solar_farm	L832419	G837971	INE733E01010	0.5	5	5	-99	40	80	120	0	0	0	0	0	0	0	0	0	5	5	5
solar	Niger	Africa	Sub-Saharan Africa	Niger (NTPC) solar farm				50	announced			Assumed PV						NTPC LTD		16.808	9.9986	approximate		Tchirozérine			https://gem.wiki/Niger_(NTPC)_solar_farm	L827703	G831249	INE733E01010	1	50	50	-99	40	80	120	0	0	0	0	0	0	0	0	0	50	50	50
solar	India	Asia	Southern Asia	Nokhra solar farm			Nokh Solar Park	300	operating	2022		PV						NTPC LTD		27.636	72.689	exact		Nokhra		Rajasthan	https://gem.wiki/Nokhra_solar_farm	L800604	G800716	INE733E01010	1	300	300	2	2062	2102	2142	0	0	300	300	300	300	300	300	300	300	300	300
solar	India	Asia	Southern Asia	Omkareshwar Floating Solar Park	2A			100	pre-construction			PV						NTPC LTD		23.8143	77.5341	approximate	Mandhata		Khnadwa	Madhya Pradesh	https://gem.wiki/Omkareshwar_Floating_Solar_Park	L800686	G800800	INE733E01010	1	100	100	-99	40	80	120	0	0	0	0	0	0	0	0	0	100	100	100
solar	India	Asia	Southern Asia	Panchet Dam floating solar farm	1			75	announced			PV						NTPC Renewable Energy		23.6802	86.7459	approximate		Nirsa-Cum-Chirkunda	Dhanbad District	Jharkhand	https://gem.wiki/Panchet_Dam_floating_solar_farm	L830012	G833851	INE733E01010	1	155		-99	40	80	120	0	0	0	0	0	0	0	0	0	75	75	75
solar	India	Asia	Southern Asia	Panchet Dam floating solar farm	2			80	announced			PV						NTPC Renewable Energy		23.6802	86.7459	approximate		Nirsa-Cum-Chirkunda	Dhanbad District	Jharkhand	https://gem.wiki/Panchet_Dam_floating_solar_farm	L830012	G833852	INE733E01010	1	155	155	-99	40	80	120	0	0	0	0	0	0	0	0	0	80	80	80
solar	Cuba	Americas	Latin America and the Caribbean	Program-06 ISA solar farm	future phases	Parque Solar Program-06 ISA solar farm		1090	announced	2030		PV						Union Electrica de Cuba [50%]; NTPC Renewable Energy LTD [50%]		22.1866	-79.6516	approximate				Villa Clara	https://gem.wiki/Program-06_ISA_solar_farm	L832422	G837974	INE733E01010	0.5	1090	1090	-6	2070	2110	2150	0	0	0	0	0	0	0	0	0	0	1090	1090
solar	Cuba	Americas	Latin America and the Caribbean	Quemado Hilario (NTPC) solar farm		Parque Solar Quemado Hilario (NTPC)		5	pre-construction			PV						Union Electrica de Cuba [50%]; NTPC Renewable Energy LTD [50%]		22.435	-79.9326	approximate	Santa Clara			Villa Clara	https://gem.wiki/Quemado_Hilario_(NTPC)_solar_farm	L832423	G837975	INE733E01010	0.5	5	5	-99	40	80	120	0	0	0	0	0	0	0	0	0	5	5	5
solar	India	Asia	Southern Asia	Raigarh solar farm				50	operating	2014		PV						NTPC LTD		22.5001	83.5001	approximate		Raigarh		Chhattisgarh	https://gem.wiki/Raigarh_solar_farm	L800605	G800717	INE733E01010	1	50	50	10	2054	2094	2134	50	50	50	50	50	50	50	50	50	50	50	50
solar	India	Asia	Southern Asia	Ramagundam (NTPC) I solar farm			Ramagundam-3 Division	38	operating	2022		PV						NTPC LTD		18.7378	79.4635	exact		Ramagundam Floating		Telangana	https://gem.wiki/Ramagundam_(NTPC)_I_solar_farm	L800607	G800719	INE733E01010	1	38	38	2	2062	2102	2142	0	0	38	38	38	38	38	38	38	38	38	38
solar	India	Asia	Southern Asia	Ramagundam (NTPC) II solar farm			Ramagundam Floating Solar	62	operating	2022		PV						NTPC LTD		18.7378	79.4635	exact		Ramagundam		Telangana	https://gem.wiki/Ramagundam_(NTPC)_II_solar_farm	L800608	G800720	INE733E01010	1	62	62	2	2062	2102	2142	0	0	62	62	62	62	62	62	62	62	62	62
solar	India	Asia	Southern Asia	Rihand solar farm				20	pre-construction			PV						NTPC LTD		24.2033	83.0053	approximate		Rihand		Uttar Pradesh	https://gem.wiki/Rihand_solar_farm	L800609	G800721	INE733E01010	1	20	20	-99	40	80	120	0	0	0	0	0	0	0	0	0	20	20	20
solar	India	Asia	Southern Asia	Sadar Ayodhya solar farm				40	pre-construction			PV						NTPC LTD		26.7962	82.2066	approximate		Sadar	Ayodhya	Uttar Pradesh	https://gem.wiki/Sadar_Ayodhya_solar_farm	L830087	G833929	INE733E01010	1	40	40	-99	40	80	120	0	0	0	0	0	0	0	0	0	40	40	40
solar	India	Asia	Southern Asia	Sambhu Ki Bhurj II solar farm				150	operating	2022		PV						NTPC LTD		22.3376	71.7211	approximate				Gujarat	https://gem.wiki/Sambhu_Ki_Bhurj_II_solar_farm	L830096	G833938	INE733E01010	1	150	150	2	2062	2102	2142	0	0	150	150	150	150	150	150	150	150	150	150
solar	India	Asia	Southern Asia	Sambhu Ki Bhurj solar farm				300	operating	2022		PV						NTPC LTD		25.1862	75.8589	approximate		Sambhu Ki Bhurj		Rajasthan	https://gem.wiki/Sambhu_Ki_Bhurj_solar_farm	L800610	G800722	INE733E01010	1	300	300	2	2062	2102	2142	0	0	300	300	300	300	300	300	300	300	300	300
solar	Sri Lanka	Asia	Southern Asia	Sampur Solar Power Project	1		Trincomalee solar farm, Trincomalee Solar	50	announced	2025		PV						NTPC LTD; India and the Ceylon Electricity Board (CEB)		8.4824	81.2983	approximate			Trincomalee district		https://gem.wiki/Sampur_Solar_Power_Project	L808766	G811044	INE733E01010	0.5	135		-1	2065	2105	2145	0	0	0	0	0	50	50	50	50	50	50	50
solar	Sri Lanka	Asia	Southern Asia	Sampur Solar Power Project	2		Trincomalee solar farm, Trincomalee Solar	85	announced			PV						NTPC LTD; India and the Ceylon Electricity Board (CEB)		8.4824	81.2983	approximate			Trincomalee district		https://gem.wiki/Sampur_Solar_Power_Project	L808766	G834928	INE733E01010	0.5	135	135	-99	40	80	120	0	0	0	0	0	0	0	0	0	85	85	85
solar	India	Asia	Southern Asia	Shajapur solar park	1		Shajapur Solar	105	pre-construction	2023		PV						NTPC LTD		23.418	76.2705	approximate			Shajapur	Madhya Pradesh	https://gem.wiki/Shajapur_solar_park	L808946	G811249	INE733E01010	1	325		1	2063	2103	2143	0	0	0	105	105	105	105	105	105	105	105	105
solar	India	Asia	Southern Asia	Shajapur solar park	2		Shajapur Solar	220	pre-construction	2023		PV						NTPC LTD		23.418	76.2705	approximate			Shajapur	Madhya Pradesh	https://gem.wiki/Shajapur_solar_park	L808946	G811250	INE733E01010	1	325	325	1	2063	2103	2143	0	0	0	220	220	220	220	220	220	220	220	220
solar	India	Asia	Southern Asia	Simhadri Floating solar farm			Simhadri	25	operating	2021		PV						NTPC LTD		14.8221	78.2817	approximate		Simhadri Floating		Andhra Pradesh	https://gem.wiki/Simhadri_Floating_solar_farm	L800611	G800723	INE733E01010	1	25	25	3	2061	2101	2141	0	25	25	25	25	25	25	25	25	25	25	25
solar	India	Asia	Southern Asia	Solapur solar farm				23	operating	2023		Assumed PV						NTPC LTD		17.6578	75.9141	approximate		Solapur		Maharashtra	https://gem.wiki/Solapur_solar_farm	L800612	G800724	INE733E01010	1	23	23	1	2063	2103	2143	0	0	0	23	23	23	23	23	23	23	23	23
solar	India	Asia	Southern Asia	Tilaiya Dam floating solar farm				155	announced			PV						NTPC Renewable Energy		24.3228	85.5202	approximate		Chandwara	Kodarma District	Jharkhand	https://gem.wiki/Tilaiya_Dam_floating_solar_farm	L830197	G834046	INE733E01010	1	155	155	-99	40	80	120	0	0	0	0	0	0	0	0	0	155	155	155
wind	India	Asia	Southern Asia	Dayapar (NTPC) II wind farm				200	pre-construction			onshore						NTPC Renewable Energy LTD		23.6348	68.9012	approximate		Dayapar	Kutch	Gujarat	https://gem.wiki/Dayapar_(NTPC)_II_wind_farm	L917046	G921148	INE733E01010	1	200	200	-99	40	80	120	0	0	0	0	0	0	0	0	0	200	200	200
wind	India	Asia	Southern Asia	Dayapar (NTPC) III wind farm				150	pre-construction			onshore						NTPC LTD		23.6348	68.9012	approximate		Dayapar	Kutch	Gujarat	https://gem.wiki/Dayapar_(NTPC)_III_wind_farm	L922381	G927920	INE733E01010	1	150		-99	40	80	120	0	0	0	0	0	0	0	0	0	150	150	150
wind	India	Asia	Southern Asia	Dayapar (NTPC) wind farm				150	pre-construction			onshore						NTPC LTD		23.6348	68.9012	approximate		Dayapar	Kutch	Gujarat	https://gem.wiki/Dayapar_(NTPC)_wind_farm	L900499	G900577	INE733E01010	1	150	150	-99	40	80	120	0	0	0	0	0	0	0	0	0	150	150	150
wind	India	Asia	Southern Asia	NTPC Hybrid SECI IV wind farm				225	pre-construction	2024		onshore						NTPC LTD		23.2064	78.382	approximate			Kutch	Gujarat	https://gem.wiki/NTPC_Hybrid_SECI_IV_wind_farm	L917097	G921199	INE733E01010	1	225		0	2064	2104	2144	0	0	0	0	225	225	225	225	225	225	225	225
wind	India	Asia	Southern Asia	NTPC Hybrid SECI V wind farm				225	pre-construction	2023		onshore						NTPC Renewable Energy LTD		23.2064	78.382	approximate			Kutch	Gujarat	https://gem.wiki/NTPC_Hybrid_SECI_V_wind_farm	L917098	G921200	INE733E01010	1	225	225	1	2063	2103	2143	0	0	0	225	225	225	225	225	225	225	225	225
wind	India	Asia	Southern Asia	Rojmal (NTPC) wind farm				50	operating			onshore						NTPC LTD		22.5415	73.4334	approximate		Rojmal		Gujarat	https://gem.wiki/Rojmal_(NTPC)_wind_farm	L900500	G900578	INE733E01010	1	50	50	-99	40	80	120	50	50	50	50	50	50	50	50	50	50	50	50
																																					TOTAL Capacity	55297.7	59182.7	62235.7	65258.7	70167.1	71017.1	71677.1	73257.1	75657.1	89507.1	90597.1	90597.1
																																					Coal	49575	53210	54325	56775	60938.4	61738.4	62398.4	63858.4	66258.4	72558.4	72558.4	72558.4
																																					Oil&Gas	4006.7	4006.7	4006.7	4006.7	4006.7	4006.7	4006.7	4006.7	4006.7	4056.7	4056.7	4056.7
																																					Fossil fuel	53581.7	57216.7	58331.7	60781.7	64945.1	65745.1	66405.1	67865.1	70265.1	76615.1	76615.1	76615.1
																																					Renewables	1716	1966	3904	4477	10222	15272	20272	25392	30392	42892	48982	53982
																																					Oil	0	0	0	0	0	0	0	0	0	0	0	0
																																					Gas	4006.7	4006.7	4006.7	4006.7	4006.7	4006.7	4006.7	4006.7	4006.7	4056.7	4056.7	4056.7
																																					Nuclear	0	0	0	0	0	0	0	0	0	0	0	0
																																					Wind	50	50	50	275	500	500	500	500	500	1000	1000	1000
																																					solar	866	1116	3054	3402	3402	3452	3452	3452	3452	10452	11542	11542
																																					hydropower	800	800	800	800	1320	1320	1320	1440	1440	1440	1440	1440
[truncated: 19 more columns]

## Sheet: NTPC_fossilfuel
Type	Country/area	Region	Subregion	Plant / Project name	Unit / Phase name	Plant / Project name (local)	Plant / Project name (other)	Capacity (MW)	Status	Start year	Retired year	Technology	Fuel	Country/area 1 (hydropower only)	Country/area 2 (hydropower only)	Country/area 1 Capacity (MW) (hydropower only)	Country/area 2 Capacity (MW) (hydropower only)	Owner	Parent	Latitude	Longitude	Location accuracy	City	Local area (taluk, county)	Major area (prefecture, district)	Subnational unit (state, province)	GEM.Wiki URL	GEM location ID	GEM unit/phase ID	CompISIN	Ownership	Plant capacity	Plant capacity	Age	Reinvestment year	Reinvestment year	Reinvestment year	Coal capacity factor 2021	Gas capacity factor 2021	Oil capacity factor 2021	Coal capacity factor 2021	Gas capacity factor 2021	Oil capacity factor 2021	Coal capacity factor 2022	Gas capacity factor 2022	Oil capacity factor 2022	Coal capacity factor 2022	Gas capacity factor 2022	Oil capacity factor 2022
coal	India	Asia	Southern Asia	Anpara-E power station (MUNPL)	Unit 1			800	announced			supercritical	unknown					Meja Urja Nigam	NTPC Ltd; Uttar Pradesh Rajya Vidyut Utpadan Nigam Ltd	24.2046	82.7827	approximate	Anpara		Sonbhadra District	Uttar Pradesh	https://www.gem.wiki/Anpara-E_power_station_(MUNPL)	L100001000082	G100001000203	INE733E01010	0.5	1600		-99	40	80	120	0.616567	0	0	0.60966	0	0	0.676943	0	0	0.730439	0	0
coal	India	Asia	Southern Asia	Anpara-E power station (MUNPL)	Unit 2			800	announced			supercritical	unknown					Meja Urja Nigam	NTPC Ltd; Uttar Pradesh Rajya Vidyut Utpadan Nigam Ltd	24.2046	82.7827	approximate	Anpara		Sonbhadra District	Uttar Pradesh	https://www.gem.wiki/Anpara-E_power_station_(MUNPL)	L100001000082	G100001000204	INE733E01010	0.5	1600	1600	-99	40	80	120	0.616567	0	0	0.60966	0	0	0.676943	0	0	0.730439	0	0
coal	India	Asia	Southern Asia	Barh I power station	Unit 1		Barh STPP	660	operating	2021		supercritical	unknown					NTPC [100%]	NTPC [100.0%]	25.4693	85.7452	exact	Barh		Patna	Bihar	https://www.gem.wiki/Barh_I_power_station	L100000102092	G100000100623	INE733E01010	1	1980		3	2061	2101	2141	0.616567	0	0	0.60966	0	0	0.676943	0	0	0.730439	0	0
coal	India	Asia	Southern Asia	Barh I power station	Unit 2		Barh STPP	660	operating	2023		supercritical	unknown					NTPC [100%]	NTPC [100.0%]	25.4865	85.7452	exact	Barh		Patna	Bihar	https://www.gem.wiki/Barh_I_power_station	L100000102092	G100000100624	INE733E01010	1	1980		1	2063	2103	2143	0.616567	0	0	0.60966	0	0	0.676943	0	0	0.730439	0	0
coal	India	Asia	Southern Asia	Barh I power station	Unit 3		Barh STPP	660	construction	2024		supercritical	unknown					NTPC [100%]	NTPC [100.0%]	25.4865	85.7452	exact	Barh		Patna	Bihar	https://www.gem.wiki/Barh_I_power_station	L100000102092	G100000100625	INE733E01010	1	1980	1980	0	2064	2104	2144	0.616567	0	0	0.60966	0	0	0.676943	0	0	0.730439	0	0
coal	India	Asia	Southern Asia	Barh II power station	Unit 1			660	operating	2014		supercritical	unknown					NTPC [100%]	NTPC [100.0%]	25.4865	85.7452	exact	Barh		Patna	Bihar	https://www.gem.wiki/Barh_II_power_station	L100000102093	G100000100626	INE733E01010	1	1320		10	2054	2094	2134	0.616567	0	0	0.60966	0	0	0.676943	0	0	0.730439	0	0
coal	India	Asia	Southern Asia	Barh II power station	Unit 2			660	operating	2015		supercritical	unknown					NTPC [100%]	NTPC [100.0%]	25.4865	85.7452	exact	Barh		Patna	Bihar	https://www.gem.wiki/Barh_II_power_station	L100000102093	G100000100627	INE733E01010	1	1320	1320	9	2055	2095	2135	0.616567	0	0	0.60966	0	0	0.676943	0	0	0.730439	0	0
coal	India	Asia	Southern Asia	Bhilai Steel power station	Unit 2			30	operating	1982		subcritical	unknown					NTPC-SAIL Power [100%]	NTPC Ltd [50.0%]; Steel Authority of India Ltd [50.0%]	21.184	81.4237	exact	Bhilai		Durg	Chhattisgarh	https://www.gem.wiki/Bhilai_Steel_power_station	L100000102132	G100000100818	INE733E01010	0.5	560		42	2022	2062	2102	0.616567	0	0	0.60966	0	0	0.676943	0	0	0.730439	0	0
coal	India	Asia	Southern Asia	Bhilai Steel power station	Unit 3			30	operating	1983		subcritical	unknown					NTPC-SAIL Power [100%]	NTPC Ltd [50.0%]; Steel Authority of India Ltd [50.0%]	21.184	81.4237	exact	Bhilai		Durg	Chhattisgarh	https://www.gem.wiki/Bhilai_Steel_power_station	L100000102132	G100000100819	INE733E01010	0.5	560		41	2023	2063	2103	0.616567	0	0	0.60966	0	0	0.676943	0	0	0.730439	0	0
coal	India	Asia	Southern Asia	Bhilai Steel power station	Unit 4			250	operating	2009		subcritical	unknown					NTPC-SAIL Power [100%]	NTPC Ltd [50.0%]; Steel Authority of India Ltd [50.0%]	21.184	81.4237	exact	Bhilai		Durg	Chhattisgarh	https://www.gem.wiki/Bhilai_Steel_power_station	L100000102132	G100000100820	INE733E01010	0.5	560		15	2049	2089	2129	0.616567	0	0	0.60966	0	0	0.676943	0	0	0.730439	0	0
coal	India	Asia	Southern Asia	Bhilai Steel power station	Unit 5			250	operating	2009		subcritical	unknown					NTPC-SAIL Power [100%]	NTPC Ltd [50.0%]; Steel Authority of India Ltd [50.0%]	21.184	81.4237	exact	Bhilai		Durg	Chhattisgarh	https://www.gem.wiki/Bhilai_Steel_power_station	L100000102132	G100000100821	INE733E01010	0.5	560	560	15	2049	2089	2129	0.616567	0	0	0.60966	0	0	0.676943	0	0	0.730439	0	0
coal	India	Asia	Southern Asia	Bongaigaon power station	Unit 1			250	operating	2015		subcritical	bituminous					NTPC [100%]	NTPC [100.0%]	26.4444	90.3672	exact	Kumguri	Kokrajhar	Kokrajhar	Assam	https://www.gem.wiki/Bongaigaon_power_station	L100000102085	G100000101007	INE733E01010	1	750		9	2055	2095	2135	0.616567	0	0	0.60966	0	0	0.676943	0	0	0.730439	0	0
coal	India	Asia	Southern Asia	Bongaigaon power station	Unit 2			250	operating	2017		subcritical	bituminous					NTPC [100%]	NTPC [100.0%]	26.4444	90.3672	exact	Kumguri	Kokrajhar	Kokrajhar	Assam	https://www.gem.wiki/Bongaigaon_power_station	L100000102085	G100000101008	INE733E01010	1	750		7	2057	2097	2137	0.616567	0	0	0.60966	0	0	0.676943	0	0	0.730439	0	0
coal	India	Asia	Southern Asia	Bongaigaon power station	Unit 3			250	operating	2019		subcritical	bituminous					NTPC [100%]	NTPC [100.0%]	26.4444	90.3672	exact	Kumguri	Kokrajhar	Kokrajhar	Assam	https://www.gem.wiki/Bongaigaon_power_station	L100000102085	G100000101009	INE733E01010	1	750	750	5	2059	2099	2139	0.616567	0	0	0.60966	0	0	0.676943	0	0	0.730439	0	0
coal	India	Asia	Southern Asia	Darlipali power station	Phase I Unit 1		Darlipalli Super Thermal Power Station; Darlipali STPS	800	operating	2019		supercritical	unknown					NTPC [100%]	NTPC [100.0%]	21.9636	83.8919	exact	Darlipali	Lephripara	Sundergarh	Odisha	https://www.gem.wiki/Darlipali_power_station	L100000102458	G100000101987	INE733E01010	1	2400		5	2059	2099	2139	0.616567	0	0	0.60966	0	0	0.676943	0	0	0.730439	0	0
coal	India	Asia	Southern Asia	Darlipali power station	Phase I Unit 2		Darlipalli Super Thermal Power Station; Darlipali STPS	800	operating	2021		supercritical	unknown					NTPC [100%]	NTPC [100.0%]	21.9636	83.8919	exact	Darlipali	Lephripara	Sundergarh	Odisha	https://www.gem.wiki/Darlipali_power_station	L100000102458	G100000101988	INE733E01010	1	2400		3	2061	2101	2141	0.616567	0	0	0.60966	0	0	0.676943	0	0	0.730439	0	0
coal	India	Asia	Southern Asia	Darlipali power station	Phase II Unit 3		Darlipalli Super Thermal Power Station; Darlipali STPS	800	pre-permit			unknown	unknown					NTPC [100%]	NTPC [100.0%]	21.9636	83.8919	exact	Darlipali	Lephripara	Sundergarh	Odisha	https://www.gem.wiki/Darlipali_power_station	L100000102458	G100000115662	INE733E01010	1	2400	2400	-99	40	80	120	0.616567	0	0	0.60966	0	0	0.676943	0	0	0.730439	0	0
coal	India	Asia	Southern Asia	Durgapur SAIL power station	Phase 2 Unit 1			60	operating	1987		subcritical	unknown					NTPC-SAIL Power [100%]	NTPC Ltd [50.0%]; Steel Authority of India Ltd [50.0%]	23.5518	87.2485	exact	Durgapur steel mill	Durgapur	Bardhaman	West Bengal	https://www.gem.wiki/Durgapur_SAIL_power_station	L100000102671	G100000102511	INE733E01010	0.5	120		37	2027	2067	2107	0.616567	0	0	0.60966	0	0	0.676943	0	0	0.730439	0	0
coal	India	Asia	Southern Asia	Durgapur SAIL power station	Phase 2 Unit 2			60	operating	1988		subcritical	unknown					NTPC-SAIL Power [100%]	NTPC Ltd [50.0%]; Steel Authority of India Ltd [50.0%]	23.5518	87.2485	exact	Durgapur steel mill	Durgapur	Bardhaman	West Bengal	https://www.gem.wiki/Durgapur_SAIL_power_station	L100000102671	G100000102512	INE733E01010	0.5	120	120	36	2028	2068	2108	0.616567	0	0	0.60966	0	0	0.676943	0	0	0.730439	0	0
coal	India	Asia	Southern Asia	Farakka power station	Unit 1			200	operating	1986		subcritical	subbituminous					NTPC [100%]	NTPC [100.0%]	24.7727	87.8937	exact	Farakka	Farakka	Murshidabad	West Bengal	https://www.gem.wiki/Farakka_power_station	L100000102673	G100000102711	INE733E01010	1	2100		38	2026	2066	2106	0.616567	0	0	0.60966	0	0	0.676943	0	0	0.730439	0	0
coal	India	Asia	Southern Asia	Farakka power station	Unit 2			200	operating	1986		subcritical	subbituminous					NTPC [100%]	NTPC [100.0%]	24.7727	87.8937	exact	Farakka	Farakka	Murshidabad	West Bengal	https://www.gem.wiki/Farakka_power_station	L100000102673	G100000102712	INE733E01010	1	2100		38	2026	2066	2106	0.616567	0	0	0.60966	0	0	0.676943	0	0	0.730439	0	0
coal	India	Asia	Southern Asia	Farakka power station	Unit 3			200	operating	1987		subcritical	subbituminous					NTPC [100%]	NTPC [100.0%]	24.7727	87.8937	exact	Farakka	Farakka	Murshidabad	West Bengal	https://www.gem.wiki/Farakka_power_station	L100000102673	G100000102713	INE733E01010	1	2100		37	2027	2067	2107	0.616567	0	0	0.60966	0	0	0.676943	0	0	0.730439	0	0
coal	India	Asia	Southern Asia	Farakka power station	Unit 4			500	operating	1992		subcritical	subbituminous					NTPC [100%]	NTPC [100.0%]	24.7727	87.8937	exact	Farakka	Farakka	Murshidabad	West Bengal	https://www.gem.wiki/Farakka_power_station	L100000102673	G100000102714	INE733E01010	1	2100		32	2032	2072	2112	0.616567	0	0	0.60966	0	0	0.676943	0	0	0.730439	0	0
coal	India	Asia	Southern Asia	Farakka power station	Unit 5			500	operating	1994		subcritical	subbituminous					NTPC [100%]	NTPC [100.0%]	24.7727	87.8937	exact	Farakka	Farakka	Murshidabad	West Bengal	https://www.gem.wiki/Farakka_power_station	L100000102673	G100000102715	INE733E01010	1	2100		30	2034	2074	2114	0.616567	0	0	0.60966	0	0	0.676943	0	0	0.730439	0	0
coal	India	Asia	Southern Asia	Farakka power station	Unit 6			500	operating	2011		subcritical	subbituminous					NTPC [100%]	NTPC [100.0%]	24.7727	87.8937	exact	Farakka	Farakka	Murshidabad	West Bengal	https://www.gem.wiki/Farakka_power_station	L100000102673	G100000102716	INE733E01010	1	2100	2100	13	2051	2091	2131	0.616567	0	0	0.60966	0	0	0.676943	0	0	0.730439	0	0
coal	India	Asia	Southern Asia	Feroze Gandhi Unchahar Power Station	Unit 1		Unchahar plant	210	operating	1988		subcritical	bituminous					NTPC [100%]	NTPC [100.0%]	25.9138	81.3272	exact	Unchahar	Unchahar	Raebareli	Uttar Pradesh	https://www.gem.wiki/Feroze_Gandhi_Unchahar_Power_Station	L100000102626	G100000102747	INE733E01010	1	1550		36	2028	2068	2108	0.616567	0	0	0.60966	0	0	0.676943	0	0	0.730439	0	0
coal	India	Asia	Southern Asia	Feroze Gandhi Unchahar Power Station	Unit 2		Unchahar plant	210	operating	1989		subcritical	bituminous					NTPC [100%]	NTPC [100.0%]	25.9138	81.3272	exact	Unchahar	Unchahar	Raebareli	Uttar Pradesh	https://www.gem.wiki/Feroze_Gandhi_Unchahar_Power_Station	L100000102626	G100000102748	INE733E01010	1	1550		35	2029	2069	2109	0.616567	0	0	0.60966	0	0	0.676943	0	0	0.730439	0	0
coal	India	Asia	Southern Asia	Feroze Gandhi Unchahar Power Station	Unit 3		Unchahar plant	210	operating	1999		subcritical	bituminous					NTPC [100%]	NTPC [100.0%]	25.9138	81.3272	exact	Unchahar	Unchahar	Raebareli	Uttar Pradesh	https://www.gem.wiki/Feroze_Gandhi_Unchahar_Power_Station	L100000102626	G100000102749	INE733E01010	1	1550		25	2039	2079	2119	0.616567	0	0	0.60966	0	0	0.676943	0	0	0.730439	0	0
coal	India	Asia	Southern Asia	Feroze Gandhi Unchahar Power Station	Unit 4		Unchahar plant	210	operating	1999		subcritical	bituminous					NTPC [100%]	NTPC [100.0%]	25.9138	81.3272	exact	Unchahar	Unchahar	Raebareli	Uttar Pradesh	https://www.gem.wiki/Feroze_Gandhi_Unchahar_Power_Station	L100000102626	G100000102750	INE733E01010	1	1550		25	2039	2079	2119	0.616567	0	0	0.60966	0	0	0.676943	0	0	0.730439	0	0
coal	India	Asia	Southern Asia	Feroze Gandhi Unchahar Power Station	Unit 5		Unchahar plant	210	operating	2006		subcritical	bituminous					NTPC [100%]	NTPC [100.0%]	25.9138	81.3272	exact	Unchahar	Unchahar	Raebareli	Uttar Pradesh	https://www.gem.wiki/Feroze_Gandhi_Unchahar_Power_Station	L100000102626	G100000102751	INE733E01010	1	1550		18	2046	2086	2126	0.616567	0	0	0.60966	0	0	0.676943	0	0	0.730439	0	0
coal	India	Asia	Southern Asia	Feroze Gandhi Unchahar Power Station	Unit 6		Unchahar plant	500	operating	2017		subcritical	bituminous					NTPC [100%]	NTPC [100.0%]	25.9123	81.3206	exact	Unchahar		Raebareli	Uttar Pradesh	https://www.gem.wiki/Feroze_Gandhi_Unchahar_Power_Station	L100000102626	G100000102752	INE733E01010	1	1550	1550	7	2057	2097	2137	0.616567	0	0	0.60966	0	0	0.676943	0	0	0.730439	0	0
coal	India	Asia	Southern Asia	Gadarwara Super Thermal Power Project	Unit 1		Narsinghpur power station	800	operating	2018		unknown	unknown					NTPC [100%]	NTPC [100.0%]	22.8618	78.8661	exact	Chorbarheta	Gadarwara	Narsinghpur	Madhya Pradesh	https://www.gem.wiki/Gadarwara_Super_Thermal_Power_Project	L100000102332	G100000102892	INE733E01010	1	1600		6	2058	2098	2138	0.616567	0	0	0.60966	0	0	0.676943	0	0	0.730439	0	0
coal	India	Asia	Southern Asia	Gadarwara Super Thermal Power Project	Unit 2		Narsinghpur power station	800	operating	2021		unknown	unknown					NTPC [100%]	NTPC [100.0%]	22.8618	78.8661	exact	Chorbarheta	Gadarwara	Narsinghpur	Madhya Pradesh	https://www.gem.wiki/Gadarwara_Super_Thermal_Power_Project	L100000102332	G100000102893	INE733E01010	1	1600	1600	3	2061	2101	2141	0.616567	0	0	0.60966	0	0	0.676943	0	0	0.730439	0	0
coal	India	Asia	Southern Asia	Indira Gandhi Super Thermal Power Project	Unit 1		Aravali Thermal Power Project	500	operating	2010		subcritical	bituminous					Aravali Power Company [100%]	NTPC Ltd [50.0%]; Haryana Power Generation Co Ltd [25.0%]; Indraprastha Power Generation Co Ltd [25.0%]	28.4851	76.3732	exact	Jharli	Matenhail	Jhajjar	Haryana	https://www.gem.wiki/Indira_Gandhi_Super_Thermal_Power_Project	L100000102237	G100000104845	INE733E01010	0.5	1500		14	2050	2090	2130	0.616567	0	0	0.60966	0	0	0.676943	0	0	0.730439	0	0
coal	India	Asia	Southern Asia	Indira Gandhi Super Thermal Power Project	Unit 2		Aravali Thermal Power Project	500	operating	2011		subcritical	bituminous					Aravali Power Company [100%]	NTPC Ltd [50.0%]; Haryana Power Generation Co Ltd [25.0%]; Indraprastha Power Generation Co Ltd [25.0%]	28.4851	76.3732	exact	Jharli	Matenhail	Jhajjar	Haryana	https://www.gem.wiki/Indira_Gandhi_Super_Thermal_Power_Project	L100000102237	G100000104846	INE733E01010	0.5	1500		13	2051	2091	2131	0.616567	0	0	0.60966	0	0	0.676943	0	0	0.730439	0	0
coal	India	Asia	Southern Asia	Indira Gandhi Super Thermal Power Project	Unit 3		Aravali Thermal Power Project	500	operating	2012		subcritical	bituminous					Aravali Power Company [100%]	NTPC Ltd [50.0%]; Haryana Power Generation Co Ltd [25.0%]; Indraprastha Power Generation Co Ltd [25.0%]	28.4851	76.3732	exact	Jharli	Matenhail	Jhajjar	Haryana	https://www.gem.wiki/Indira_Gandhi_Super_Thermal_Power_Project	L100000102237	G100000104847	INE733E01010	0.5	1500	1500	12	2052	2092	2132	0.616567	0	0	0.60966	0	0	0.676943	0	0	0.730439	0	0
coal	India	Asia	Southern Asia	Kahalgaon Super Thermal Power Plant	Unit 1			210	operating	1992		subcritical	lignite					NTPC [100%]	NTPC [100.0%]	25.2369	87.2656	exact	Kahalgaon		Bhagalpur	Bihar	https://www.gem.wiki/Kahalgaon_Super_Thermal_Power_Plant	L100000102104	G100000105425	INE733E01010	1	2340		32	2032	2072	2112	0.616567	0	0	0.60966	0	0	0.676943	0	0	0.730439	0	0
coal	India	Asia	Southern Asia	Kahalgaon Super Thermal Power Plant	Unit 2			210	operating	1994		subcritical	lignite					NTPC [100%]	NTPC [100.0%]	25.2369	87.2656	exact	Kahalgaon		Bhagalpur	Bihar	https://www.gem.wiki/Kahalgaon_Super_Thermal_Power_Plant	L100000102104	G100000105426	INE733E01010	1	2340		30	2034	2074	2114	0.616567	0	0	0.60966	0	0	0.676943	0	0	0.730439	0	0
coal	India	Asia	Southern Asia	Kahalgaon Super Thermal Power Plant	Unit 3			210	operating	1995		subcritical	lignite					NTPC [100%]	NTPC [100.0%]	25.2369	87.2656	exact	Kahalgaon		Bhagalpur	Bihar	https://www.gem.wiki/Kahalgaon_Super_Thermal_Power_Plant	L100000102104	G100000105427	INE733E01010	1	2340		29	2035	2075	2115	0.616567	0	0	0.60966	0	0	0.676943	0	0	0.730439	0	0
coal	India	Asia	Southern Asia	Kahalgaon Super Thermal Power Plant	Unit 4			210	operating	1996		subcritical	lignite					NTPC [100%]	NTPC [100.0%]	25.2369	87.2656	exact	Kahalgaon		Bhagalpur	Bihar	https://www.gem.wiki/Kahalgaon_Super_Thermal_Power_Plant	L100000102104	G100000105428	INE733E01010	1	2340		28	2036	2076	2116	0.616567	0	0	0.60966	0	0	0.676943	0	0	0.730439	0	0
coal	India	Asia	Southern Asia	Kahalgaon Super Thermal Power Plant	Unit 5			500	operating	2008		subcritical	lignite					NTPC [100%]	NTPC [100.0%]	25.2369	87.2656	exact	Kahalgaon		Bhagalpur	Bihar	https://www.gem.wiki/Kahalgaon_Super_Thermal_Power_Plant	L100000102104	G100000105429	INE733E01010	1	2340		16	2048	2088	2128	0.616567	0	0	0.60966	0	0	0.676943	0	0	0.730439	0	0
coal	India	Asia	Southern Asia	Kahalgaon Super Thermal Power Plant	Unit 6			500	operating	2009		subcritical	lignite					NTPC [100%]	NTPC [100.0%]	25.2369	87.2656	exact	Kahalgaon		Bhagalpur	Bihar	https://www.gem.wiki/Kahalgaon_Super_Thermal_Power_Plant	L100000102104	G100000105430	INE733E01010	1	2340		15	2049	2089	2129	0.616567	0	0	0.60966	0	0	0.676943	0	0	0.730439	0	0
coal	India	Asia	Southern Asia	Kahalgaon Super Thermal Power Plant	Unit 7			500	operating	2010		subcritical	lignite					NTPC [100%]	NTPC [100.0%]	25.2369	87.2656	exact	Kahalgaon		Bhagalpur	Bihar	https://www.gem.wiki/Kahalgaon_Super_Thermal_Power_Plant	L100000102104	G100000105431	INE733E01010	1	2340	2340	14	2050	2090	2130	0.616567	0	0	0.60966	0	0	0.676943	0	0	0.730439	0	0
coal	India	Asia	Southern Asia	Katwa Super Thermal Power Project (NTPC)	Unit 1			660	shelved			supercritical	unknown					NTPC [100%]	NTPC [100.0%]	23.65	88.13	approximate	Katwa		Bardhaman	West Bengal	https://www.gem.wiki/Katwa_Super_Thermal_Power_Project_(NTPC)	L100000102676	G100000105623	INE733E01010	1	1320		-99	40	80	120	0.616567	0	0	0.60966	0	0	0.676943	0	0	0.730439	0	0
coal	India	Asia	Southern Asia	Katwa Super Thermal Power Project (NTPC)	Unit 2			660	shelved			supercritical	unknown					NTPC [100%]	NTPC [100.0%]	23.65	88.13	approximate	Katwa		Bardhaman	West Bengal	https://www.gem.wiki/Katwa_Super_Thermal_Power_Project_(NTPC)	L100000102676	G100000105624	INE733E01010	1	1320		-99	40	80	120	0.616567	0	0	0.60966	0	0	0.676943	0	0	0.730439	0	0
coal	India	Asia	Southern Asia	Khargone power station	Unit 1			660	operating	2019		ultra-supercritical	unknown					NTPC [100%]	NTPC [100.0%]	22.0652	75.8519	exact	Selda	Barwah	Khargone	Madhya Pradesh	https://www.gem.wiki/Khargone_power_station	L100000102345	G100000105722	INE733E01010	1	1320		5	2059	2099	2139	0.616567	0	0	0.60966	0	0	0.676943	0	0	0.730439	0	0
coal	India	Asia	Southern Asia	Khargone power station	Unit 2			660	operating	2020		ultra-supercritical	unknown					NTPC [100%]	NTPC [100.0%]	22.0652	75.8519	exact	Selda	Barwah	Khargone	Madhya Pradesh	https://www.gem.wiki/Khargone_power_station	L100000102345	G100000105723	INE733E01010	1	1320		4	2060	2100	2140	0.616567	0	0	0.60966	0	0	0.676943	0	0	0.730439	0	0
coal	India	Asia	Southern Asia	Khurja power station	Unit 1			660	construction	2024		supercritical	unknown					THDC India [100%]	NTPC Ltd [74.5%]; State of Uttar Pradesh [25.5%]	28.1583	77.9083	exact	Naiphal	Khurja	Bulandshahar	Uttar Pradesh	https://www.gem.wiki/Khurja_power_station	L100000102636	G100000105727	INE733E01010	0.745	1320		0	2064	2104	2144	0.616567	0	0	0.60966	0	0	0.676943	0	0	0.730439	0	0
coal	India	Asia	Southern Asia	Khurja power station	Unit 2			660	construction	2024		supercritical	unknown					THDC India [100%]	NTPC Ltd [74.5%]; State of Uttar Pradesh [25.5%]	28.1583	77.9083	exact	Naiphal	Khurja	Bulandshahar	Uttar Pradesh	https://www.gem.wiki/Khurja_power_station	L100000102636	G100000112418	INE733E01010	0.745	1320	1320	0	2064	2104	2144	0.616567	0	0	0.60966	0	0	0.676943	0	0	0.730439	0	0
coal	India	Asia	Southern Asia	Korba Super Thermal Power Station (NTPC)	Unit 1		Korba III power station (Unit 7) (Unit 7 (Korba III))	200	operating	1983		subcritical	bituminous					NTPC [100%]	NTPC [100.0%]	22.3874	82.6819	exact	Kusmunda	Katghora	Korba	Chhattisgarh	https://www.gem.wiki/Korba_Super_Thermal_Power_Station_(NTPC)	L100000102157	G100000105864	INE733E01010	1	2600		41	2023	2063	2103	0.616567	0	0	0.60966	0	0	0.676943	0	0	0.730439	0	0
coal	India	Asia	Southern Asia	Korba Super Thermal Power Station (NTPC)	Unit 2		Korba III power station (Unit 7) (Unit 7 (Korba III))	200	operating	1983		subcritical	bituminous					NTPC [100%]	NTPC [100.0%]	22.3874	82.6819	exact	Kusmunda	Katghora	Korba	Chhattisgarh	https://www.gem.wiki/Korba_Super_Thermal_Power_Station_(NTPC)	L100000102157	G100000105865	INE733E01010	1	2600		41	2023	2063	2103	0.616567	0	0	0.60966	0	0	0.676943	0	0	0.730439	0	0
coal	India	Asia	Southern Asia	Korba Super Thermal Power Station (NTPC)	Unit 3		Korba III power station (Unit 7) (Unit 7 (Korba III))	200	operating	1984		subcritical	bituminous					NTPC [100%]	NTPC [100.0%]	22.3874	82.6819	exact	Kusmunda	Katghora	Korba	Chhattisgarh	https://www.gem.wiki/Korba_Super_Thermal_Power_Station_(NTPC)	L100000102157	G100000105866	INE733E01010	1	2600		40	2024	2064	2104	0.616567	0	0	0.60966	0	0	0.676943	0	0	0.730439	0	0
coal	India	Asia	Southern Asia	Korba Super Thermal Power Station (NTPC)	Unit 4		Korba III power station (Unit 7) (Unit 7 (Korba III))	500	operating	1987		subcritical	bituminous					NTPC [100%]	NTPC [100.0%]	22.3874	82.6819	exact	Kusmunda	Katghora	Korba	Chhattisgarh	https://www.gem.wiki/Korba_Super_Thermal_Power_Station_(NTPC)	L100000102157	G100000105867	INE733E01010	1	2600		37	2027	2067	2107	0.616567	0	0	0.60966	0	0	0.676943	0	0	0.730439	0	0
coal	India	Asia	Southern Asia	Korba Super Thermal Power Station (NTPC)	Unit 5		Korba III power station (Unit 7) (Unit 7 (Korba III))	500	operating	1988		subcritical	bituminous					NTPC [100%]	NTPC [100.0%]	22.3874	82.6819	exact	Kusmunda	Katghora	Korba	Chhattisgarh	https://www.gem.wiki/Korba_Super_Thermal_Power_Station_(NTPC)	L100000102157	G100000105868	INE733E01010	1	2600		36	2028	2068	2108	0.616567	0	0	0.60966	0	0	0.676943	0	0	0.730439	0	0
coal	India	Asia	Southern Asia	Korba Super Thermal Power Station (NTPC)	Unit 6		Korba III power station (Unit 7) (Unit 7 (Korba III))	500	operating	1989		subcritical	bituminous					NTPC [100%]	NTPC [100.0%]	22.3874	82.6819	exact	Kusmunda	Katghora	Korba	Chhattisgarh	https://www.gem.wiki/Korba_Super_Thermal_Power_Station_(NTPC)	L100000102157	G100000105869	INE733E01010	1	2600		35	2029	2069	2109	0.616567	0	0	0.60966	0	0	0.676943	0	0	0.730439	0	0
coal	India	Asia	Southern Asia	Korba Super Thermal Power Station (NTPC)	Unit 7 (Korba III)		Korba III power station (Unit 7) (Unit 7 (Korba III))	500	operating	2010		subcritical	bituminous					NTPC [100%]	NTPC [100.0%]	22.3881	82.6858	exact	Kusmunda	Katghora	Korba	Chhattisgarh	https://www.gem.wiki/Korba_Super_Thermal_Power_Station_(NTPC)	L100000102157	G100000105870	INE733E01010	1	2600	2600	14	2050	2090	2130	0.616567	0	0	0.60966	0	0	0.676943	0	0	0.730439	0	0
coal	India	Asia	Southern Asia	Kudgi Super Thermal Power Project	Unit 1			800	operating	2016		supercritical	unknown					NTPC [100%]	NTPC [100.0%]	16.4995	75.8346	exact	Kudgi		Bijapur	Karnataka	https://www.gem.wiki/Kudgi_Super_Thermal_Power_Project	L100000102306	G100000106008	INE733E01010	1	2400		8	2056	2096	2136	0.616567	0	0	0.60966	0	0	0.676943	0	0	0.730439	0	0
coal	India	Asia	Southern Asia	Kudgi Super Thermal Power Project	Unit 2			800	operating	2017		supercritical	unknown					NTPC [100%]	NTPC [100.0%]	16.4995	75.8346	exact	Kudgi		Bijapur	Karnataka	https://www.gem.wiki/Kudgi_Super_Thermal_Power_Project	L100000102306	G100000106009	INE733E01010	1	2400		7	2057	2097	2137	0.616567	0	0	0.60966	0	0	0.676943	0	0	0.730439	0	0
coal	India	Asia	Southern Asia	Kudgi Super Thermal Power Project	Unit 3			800	operating	2018		supercritical	unknown					NTPC [100%]	NTPC [100.0%]	16.4995	75.8346	exact	Kudgi		Bijapur	Karnataka	https://www.gem.wiki/Kudgi_Super_Thermal_Power_Project	L100000102306	G100000106010	INE733E01010	1	2400	2400	6	2058	2098	2138	0.616567	0	0	0.60966	0	0	0.676943	0	0	0.730439	0	0
coal	India	Asia	Southern Asia	Lara Integrated Thermal Power Project	Unit 1		NTPC Lara, Lara STPP	800	operating	2018		supercritical	unknown					NTPC [100%]	NTPC [100.0%]	21.7577	83.4575	exact	Mahloi	Pussore	Raigarh	Chhattisgarh	https://www.gem.wiki/Lara_Integrated_Thermal_Power_Project	L100000102164	G100000106174	INE733E01010	1	3200		6	2058	2098	2138	0.616567	0	0	0.60966	0	0	0.676943	0	0	0.730439	0	0
coal	India	Asia	Southern Asia	Lara Integrated Thermal Power Project	Unit 2		NTPC Lara, Lara STPP	800	operating	2020		supercritical	unknown					NTPC [100%]	NTPC [100.0%]	21.7577	83.4575	exact	Mahloi	Pussore	Raigarh	Chhattisgarh	https://www.gem.wiki/Lara_Integrated_Thermal_Power_Project	L100000102164	G100000106175	INE733E01010	1	3200		4	2060	2100	2140	0.616567	0	0	0.60966	0	0	0.676943	0	0	0.730439	0	0
coal	India	Asia	Southern Asia	Lara Integrated Thermal Power Project	Unit 3		NTPC Lara, Lara STPP	800	permitted	2028		supercritical	unknown					NTPC [100%]	NTPC [100.0%]	21.7577	83.4575	exact	Mahloi	Pussore	Raigarh	Chhattisgarh	https://www.gem.wiki/Lara_Integrated_Thermal_Power_Project	L100000102164	G100000106176	INE733E01010	1	3200		-4	2068	2108	2148	0.616567	0	0	0.60966	0	0	0.676943	0	0	0.730439	0	0
coal	India	Asia	Southern Asia	Lara Integrated Thermal Power Project	Unit 4		NTPC Lara, Lara STPP	800	permitted	2028		supercritical	unknown					NTPC [100%]	NTPC [100.0%]	21.7577	83.4575	exact	Mahloi	Pussore	Raigarh	Chhattisgarh	https://www.gem.wiki/Lara_Integrated_Thermal_Power_Project	L100000102164	G100000106177	INE733E01010	1	3200	3200	-4	2068	2108	2148	0.616567	0	0	0.60966	0	0	0.676943	0	0	0.730439	0	0
coal	India	Asia	Southern Asia	Mauda power station	Unit 1		Mouda Super Thermal Power Project	500	operating	2012		subcritical	unknown					NTPC [100%]	NTPC [100.0%]	21.1807	79.3965	exact		Mouda	Nabpur	Maharashtra	https://www.gem.wiki/Mauda_power_station	L100000102415	G100000106746	INE733E01010	1	2320		12	2052	2092	2132	0.616567	0	0	0.60966	0	0	0.676943	0	0	0.730439	0	0
coal	India	Asia	Southern Asia	Mauda power station	Unit 2		Mouda Super Thermal Power Project	500	operating	2013		subcritical	unknown					NTPC [100%]	NTPC [100.0%]	21.1807	79.3965	exact		Mouda	Nabpur	Maharashtra	https://www.gem.wiki/Mauda_power_station	L100000102415	G100000106747	INE733E01010	1	2320		11	2053	2093	2133	0.616567	0	0	0.60966	0	0	0.676943	0	0	0.730439	0	0
coal	India	Asia	Southern Asia	Mauda power station	Unit 3		Mouda Super Thermal Power Project	660	operating	2016		supercritical	unknown					NTPC [100%]	NTPC [100.0%]	21.1807	79.3965	exact		Mouda	Nabpur	Maharashtra	https://www.gem.wiki/Mauda_power_station	L100000102415	G100000106748	INE733E01010	1	2320		8	2056	2096	2136	0.616567	0	0	0.60966	0	0	0.676943	0	0	0.730439	0	0
coal	India	Asia	Southern Asia	Mauda power station	Unit 4		Mouda Super Thermal Power Project	660	operating	2017		supercritical	unknown					NTPC [100%]	NTPC [100.0%]	21.1807	79.3965	exact		Mouda	Nabpur	Maharashtra	https://www.gem.wiki/Mauda_power_station	L100000102415	G100000106749	INE733E01010	1	2320	2320	7	2057	2097	2137	0.616567	0	0	0.60966	0	0	0.676943	0	0	0.730439	0	0
coal	India	Asia	Southern Asia	Meja Thermal Power Project	Stage I Unit 1			660	operating	2018		supercritical	unknown					Meja Urja Nigam [100%]	NTPC Ltd [50.0%]; Uttar Pradesh Rajya Vidyut Utpadan Nigam Ltd [50.0%]	25.1459	81.9401	exact	Meja		Allahabad	Uttar Pradesh	https://www.gem.wiki/Meja_Thermal_Power_Project	L100000102640	G100000106821	INE733E01010	0.5	3720		6	2058	2098	2138	0.616567	0	0	0.60966	0	0	0.676943	0	0	0.730439	0	0
coal	India	Asia	Southern Asia	Meja Thermal Power Project	Stage I Unit 2			660	operating	2021		supercritical	unknown					Meja Urja Nigam [100%]	NTPC Ltd [50.0%]; Uttar Pradesh Rajya Vidyut Utpadan Nigam Ltd [50.0%]	25.1459	81.9401	exact	Meja		Allahabad	Uttar Pradesh	https://www.gem.wiki/Meja_Thermal_Power_Project	L100000102640	G100000106822	INE733E01010	0.5	3720		3	2061	2101	2141	0.616567	0	0	0.60966	0	0	0.676943	0	0	0.730439	0	0
coal	India	Asia	Southern Asia	Meja Thermal Power Project	Stage II Unit 3			800	pre-permit			unknown	unknown					Meja Urja Nigam [100%]	NTPC Ltd [50.0%]; Uttar Pradesh Rajya Vidyut Utpadan Nigam Ltd [50.0%]	25.1459	81.9401	exact	Meja		Allahabad	Uttar Pradesh	https://www.gem.wiki/Meja_Thermal_Power_Project	L100000102640	G100000115761	INE733E01010	0.5	3720		-99	40	80	120	0.616567	0	0	0.60966	0	0	0.676943	0	0	0.730439	0	0
coal	India	Asia	Southern Asia	Meja Thermal Power Project	Stage II Unit 4			800	pre-permit			unknown	unknown					Meja Urja Nigam [100%]	NTPC Ltd [50.0%]; Uttar Pradesh Rajya Vidyut Utpadan Nigam Ltd [50.0%]	25.1459	81.9401	exact	Meja		Allahabad	Uttar Pradesh	https://www.gem.wiki/Meja_Thermal_Power_Project	L100000102640	G100000115762	INE733E01010	0.5	3720		-99	40	80	120	0.616567	0	0	0.60966	0	0	0.676943	0	0	0.730439	0	0
coal	India	Asia	Southern Asia	Meja Thermal Power Project	Stage II Unit 5			800	pre-permit			unknown	unknown					Meja Urja Nigam [100%]	NTPC Ltd [50.0%]; Uttar Pradesh Rajya Vidyut Utpadan Nigam Ltd [50.0%]	25.1459	81.9401	exact	Meja		Allahabad	Uttar Pradesh	https://www.gem.wiki/Meja_Thermal_Power_Project	L100000102640	G100001000259	INE733E01010	0.5	3720	3720	-99	40	80	120	0.616567	0	0	0.60966	0	0	0.676943	0	0	0.730439	0	0
coal	India	Asia	Southern Asia	Muzaffarpur power station	Unit 3		Kanti power station, Kanti Muzaffarpur power station	195	operating	2015		subcritical	bituminous					Kanti Bijlee Utpadan Nigam [100%]	NTPC Ltd [100.0%]	26.1948	85.3033	exact	Kanti		Muzaffarpur	Bihar	https://www.gem.wiki/Muzaffarpur_power_station	L100000102112	G100000107144	INE733E01010	1	390		9	2055	2095	2135	0.616567	0	0	0.60966	0	0	0.676943	0	0	0.730439	0	0
coal	India	Asia	Southern Asia	Muzaffarpur power station	Unit 4		Kanti power station, Kanti Muzaffarpur power station	195	operating	2017		unknown	unknown					Kanti Bijlee Utpadan Nigam [100%]	NTPC Ltd [100.0%]	26.1948	85.3033	exact	Kanti		Muzaffarpur	Bihar	https://www.gem.wiki/Muzaffarpur_power_station	L100000102112	G100000107145	INE733E01010	1	390	390	7	2057	2097	2137	0.616567	0	0	0.60966	0	0	0.676943	0	0	0.730439	0	0
coal	India	Asia	Southern Asia	Nabinagar Super Thermal Power Project	Unit 1		New Nabi Nagar	660	operating	2019		supercritical	unknown					Nabinagar Power Generating Company [100%]	NTPC Ltd [100.0%]	24.776	84.158	exact	Majhiyan and Ankorha	Nabinagar	Aurangabad	Bihar	https://www.gem.wiki/Nabinagar_Super_Thermal_Power_Project	L100000102113	G100000107158	INE733E01010	1	1980		5	2059	2099	2139	0.616567	0	0	0.60966	0	0	0.676943	0	0	0.730439	0	0
coal	India	Asia	Southern Asia	Nabinagar Super Thermal Power Project	Unit 2		New Nabi Nagar	660	operating	2021		supercritical	unknown					Nabinagar Power Generating Company [100%]	NTPC Ltd [100.0%]	24.776	84.158	exact	Majhiyan and Ankorha	Nabinagar	Aurangabad	Bihar	https://www.gem.wiki/Nabinagar_Super_Thermal_Power_Project	L100000102113	G100000107159	INE733E01010	1	1980		3	2061	2101	2141	0.616567	0	0	0.60966	0	0	0.676943	0	0	0.730439	0	0
coal	India	Asia	Southern Asia	Nabinagar Super Thermal Power Project	Unit 3		New Nabi Nagar	660	operating	2022		supercritical	unknown					Nabinagar Power Generating Company [100%]	NTPC Ltd [100.0%]	24.776	84.158	exact	Majhiyan and Ankorha	Nabinagar	Aurangabad	Bihar	https://www.gem.wiki/Nabinagar_Super_Thermal_Power_Project	L100000102113	G100000107160	INE733E01010	1	1980	1980	2	2062	2102	2142	0.616567	0	0	0.60966	0	0	0.676943	0	0	0.730439	0	0
coal	India	Asia	Southern Asia	Nabinagar Thermal Power Project	Unit 1		Nabi Nagar TPP	250	operating	2016		subcritical	unknown					Bhartiya Rail Bijlee [100%]	NTPC Ltd [74.0%]; Indian Railways [26.0%]	24.7051	84.0887	exact	Dhundwa	Nabinagar	Aurangabad	Bihar	https://www.gem.wiki/Nabinagar_Thermal_Power_Project	L100000102114	G100000107161	INE733E01010	0.74	1000		8	2056	2096	2136	0.616567	0	0	0.60966	0	0	0.676943	0	0	0.730439	0	0
coal	India	Asia	Southern Asia	Nabinagar Thermal Power Project	Unit 2		Nabi Nagar TPP	250	operating	2017		subcritical	unknown					Bhartiya Rail Bijlee [100%]	NTPC Ltd [74.0%]; Indian Railways [26.0%]	24.7051	84.0887	exact	Dhundwa	Nabinagar	Aurangabad	Bihar	https://www.gem.wiki/Nabinagar_Thermal_Power_Project	L100000102114	G100000107162	INE733E01010	0.74	1000		7	2057	2097	2137	0.616567	0	0	0.60966	0	0	0.676943	0	0	0.730439	0	0
coal	India	Asia	Southern Asia	Nabinagar Thermal Power Project	Unit 3		Nabi Nagar TPP	250	operating	2019		subcritical	unknown					Bhartiya Rail Bijlee [100%]	NTPC Ltd [74.0%]; Indian Railways [26.0%]	24.7051	84.0887	exact	Dhundwa	Nabinagar	Aurangabad	Bihar	https://www.gem.wiki/Nabinagar_Thermal_Power_Project	L100000102114	G100000107163	INE733E01010	0.74	1000		5	2059	2099	2139	0.616567	0	0	0.60966	0	0	0.676943	0	0	0.730439	0	0
coal	India	Asia	Southern Asia	Nabinagar Thermal Power Project	Unit 4		Nabi Nagar TPP	250	operating	2021		subcritical	unknown					Bhartiya Rail Bijlee [100%]	NTPC Ltd [74.0%]; Indian Railways [26.0%]	24.7051	84.0887	exact	Dhundwa	Nabinagar	Aurangabad	Bihar	https://www.gem.wiki/Nabinagar_Thermal_Power_Project	L100000102114	G100000107164	INE733E01010	0.74	1000	1000	3	2061	2101	2141	0.616567	0	0	0.60966	0	0	0.676943	0	0	0.730439	0	0
coal	India	Asia	Southern Asia	National Capital Dadri Thermal Power Plant	Stage I Unit 1		NCTPP; NTPC Dadri	210	operating	1991		subcritical	unknown					NTPC [100%]	NTPC [100.0%]	28.603	77.6078	exact	Dadri	Dadri	Gautam Buddha Nagar	Uttar Pradesh	https://www.gem.wiki/National_Capital_Dadri_Thermal_Power_Plant	L100000102642	G100000107306	INE733E01010	1	1820		33	2031	2071	2111	0.616567	0	0	0.60966	0	0	0.676943	0	0	0.730439	0	0
coal	India	Asia	Southern Asia	National Capital Dadri Thermal Power Plant	Stage I Unit 2		NCTPP; NTPC Dadri	210	operating	1992		subcritical	unknown					NTPC [100%]	NTPC [100.0%]	28.603	77.6078	exact	Dadri	Dadri	Gautam Buddha Nagar	Uttar Pradesh	https://www.gem.wiki/National_Capital_Dadri_Thermal_Power_Plant	L100000102642	G100000107307	INE733E01010	1	1820		32	2032	2072	2112	0.616567	0	0	0.60966	0	0	0.676943	0	0	0.730439	0	0
coal	India	Asia	Southern Asia	National Capital Dadri Thermal Power Plant	Stage I Unit 3		NCTPP; NTPC Dadri	210	operating	1993		subcritical	unknown					NTPC [100%]	NTPC [100.0%]	28.603	77.6078	exact	Dadri	Dadri	Gautam Buddha Nagar	Uttar Pradesh	https://www.gem.wiki/National_Capital_Dadri_Thermal_Power_Plant	L100000102642	G100000107308	INE733E01010	1	1820		31	2033	2073	2113	0.616567	0	0	0.60966	0	0	0.676943	0	0	0.730439	0	0
coal	India	Asia	Southern Asia	National Capital Dadri Thermal Power Plant	Stage I Unit 4		NCTPP; NTPC Dadri	210	operating	1994		subcritical	unknown					NTPC [100%]	NTPC [100.0%]	28.603	77.6078	exact	Dadri	Dadri	Gautam Buddha Nagar	Uttar Pradesh	https://www.gem.wiki/National_Capital_Dadri_Thermal_Power_Plant	L100000102642	G100000107309	INE733E01010	1	1820		30	2034	2074	2114	0.616567	0	0	0.60966	0	0	0.676943	0	0	0.730439	0	0
coal	India	Asia	Southern Asia	National Capital Dadri Thermal Power Plant	Stage II Unit 5		NCTPP; NTPC Dadri	490	operating	2010		subcritical	unknown					NTPC [100%]	NTPC [100.0%]	28.603	77.6078	exact	Dadri	Dadri	Gautam Budh Nagar	Uttar Pradesh	https://www.gem.wiki/National_Capital_Dadri_Thermal_Power_Plant	L100000102642	G100000107310	INE733E01010	1	1820		14	2050	2090	2130	0.616567	0	0	0.60966	0	0	0.676943	0	0	0.730439	0	0
coal	India	Asia	Southern Asia	National Capital Dadri Thermal Power Plant	Stage II Unit 6		NCTPP; NTPC Dadri	490	operating	2010		subcritical	unknown					NTPC [100%]	NTPC [100.0%]	28.603	77.6078	exact	Dadri	Dadri	Gautam Budh Nagar	Uttar Pradesh	https://www.gem.wiki/National_Capital_Dadri_Thermal_Power_Plant	L100000102642	G100000107311	INE733E01010	1	1820	1820	14	2050	2090	2130	0.616567	0	0	0.60966	0	0	0.676943	0	0	0.730439	0	0
coal	India	Asia	Southern Asia	North Karanpura power station	Unit 1			660	operating	2023		supercritical	unknown					NTPC [100%]	NTPC [100.0%]	23.8508	85.0124	exact	Tandwa town		Chatra	Jharkhand	https://www.gem.wiki/North_Karanpura_power_station	L100000102278	G100000107506	INE733E01010	1	1980		1	2063	2103	2143	0.616567	0	0	0.60966	0	0	0.676943	0	0	0.730439	0	0
coal	India	Asia	Southern Asia	North Karanpura power station	Unit 2			660	construction	2024		supercritical	unknown					NTPC [100%]	NTPC [100.0%]	23.8508	85.0124	exact	Tandwa town		Chatra	Jharkhand	https://www.gem.wiki/North_Karanpura_power_station	L100000102278	G100000107507	INE733E01010	1	1980		0	2064	2104	2144	0.616567	0	0	0.60966	0	0	0.676943	0	0	0.730439	0	0
coal	India	Asia	Southern Asia	North Karanpura power station	Unit 3			660	construction	2024		supercritical	unknown					NTPC [100%]	NTPC [100.0%]	23.8508	85.0124	exact	Tandwa town		Chatra	Jharkhand	https://www.gem.wiki/North_Karanpura_power_station	L100000102278	G100000107508	INE733E01010	1	1980	1980	0	2064	2104	2144	0.616567	0	0	0.60966	0	0	0.676943	0	0	0.730439	0	0
coal	India	Asia	Southern Asia	NTPC Seoni power station	Phase 1		Jhabua Power Seoni power station	600	operating	2016		subcritical	unknown					Jhabua Power [100%]	NTPC Ltd [50.0%]; other unknown/mixed entity types [41.3%]; Yes Bank Ltd [8.7%]	22.7355	79.9123	exact	Barela and Gorakhpur	Ghansore	Seoni	Madhya Pradesh	https://www.gem.wiki/NTPC_Seoni_power_station	L100000102340	G100000105026	INE733E01010	0.5	1200		8	2056	2096	2136	0.616567	0	0	0.60966	0	0	0.676943	0	0	0.730439	0	0
coal	India	Asia	Southern Asia	NTPC Seoni power station	Phase 2		Jhabua Power Seoni power station	600	permitted			subcritical	unknown					Jhabua Power [100%]	NTPC Ltd [50.0%]; other unknown/mixed entity types [41.3%]; Yes Bank Ltd [8.7%]	22.7355	79.9123	exact	Barela and Gorakhpur	Ghansore	Seoni	Madhya Pradesh	https://www.gem.wiki/NTPC_Seoni_power_station	L100000102340	G100000105027	INE733E01010	0.5	1200	1200	-99	40	80	120	0.616567	0	0	0.60966	0	0	0.676943	0	0	0.730439	0	0
coal	India	Asia	Southern Asia	Obra Thermal Power Station	D Unit 1			800	announced	2027		ultra-supercritical	unknown					State of Uttar Pradesh [50%]; NTPC [50%]	NTPC [50.0%]; State of Uttar Pradesh [50.0%]	24.4445	82.98	exact			Sonbhadra	Uttar Pradesh	https://www.gem.wiki/Obra_Thermal_Power_Station	L100000102644	G100000115946	INE733E01010	0.5	1600		-3	2067	2107	2147	0.616567	0	0	0.60966	0	0	0.676943	0	0	0.730439	0	0
coal	India	Asia	Southern Asia	Obra Thermal Power Station	D Unit 2			800	announced	2028		ultra-supercritical	unknown					State of Uttar Pradesh [50%]; NTPC [50%]	NTPC [50.0%]; State of Uttar Pradesh [50.0%]	24.4445	82.98	exact			Sonbhadra	Uttar Pradesh	https://www.gem.wiki/Obra_Thermal_Power_Station	L100000102644	G100000115947	INE733E01010	0.5	1600	1600	-4	2068	2108	2148	0.616567	0	0	0.60966	0	0	0.676943	0	0	0.730439	0	0
coal	India	Asia	Southern Asia	Patratu JSEB power station	Unit 11		Patratu UMPP	800	construction	2024		supercritical	unknown					Jharkhand State Electricity Board; NTPC	Jharkhand State Electricity Board; NTPC	23.64	85.2931	exact	Patratu	Patratu	Ramgarh	Jharkhand	https://www.gem.wiki/Patratu_JSEB_power_station	L100000102281	G100000107870	INE733E01010	0.5	2400		0	2064	2104	2144	0.616567	0	0	0.60966	0	0	0.676943	0	0	0.730439	0	0
coal	India	Asia	Southern Asia	Patratu JSEB power station	Unit 12		Patratu UMPP	800	construction	2025		supercritical	unknown					Jharkhand State Electricity Board; NTPC	Jharkhand State Electricity Board; NTPC	23.64	85.2931	exact	Patratu	Patratu	Ramgarh	Jharkhand	https://www.gem.wiki/Patratu_JSEB_power_station	L100000102281	G100000107871	INE733E01010	0.5	2400		-1	2065	2105	2145	0.616567	0	0	0.60966	0	0	0.676943	0	0	0.730439	0	0
coal	India	Asia	Southern Asia	Patratu JSEB power station	Unit 13		Patratu UMPP	800	construction	2025		supercritical	unknown					Jharkhand State Electricity Board; NTPC	Jharkhand State Electricity Board; NTPC	23.64	85.2931	exact	Patratu	Patratu	Ramgarh	Jharkhand	https://www.gem.wiki/Patratu_JSEB_power_station	L100000102281	G100000107872	INE733E01010	0.5	2400	2400	-1	2065	2105	2145	0.616567	0	0	0.60966	0	0	0.676943	0	0	0.730439	0	0
coal	India	Asia	Southern Asia	Ramagundam power station	Stage I Unit 1		Telangana TPP (Stage IV Unit 8, Stage IV Unit 9, Stage V Unit 10, Stage V Unit 11, Stage V Unit 12), Telangana super thermal power project (Stage IV Unit 8, Stage IV Unit 9, Stage V Unit 10, Stage V Unit 11, Stage V Unit 12)	200	operating	1983		subcritical	bituminous					NTPC [100%]	NTPC [100.0%]	18.7585	79.4573	exact	Ramagundam	Ramagundam	Karimnagar	Telangana	https://www.gem.wiki/Ramagundam_power_station	L100000102602	G100000108463	INE733E01010	1	4200		41	2023	2063	2103	0.616567	0	0	0.60966	0	0	0.676943	0	0	0.730439	0	0
coal	India	Asia	Southern Asia	Ramagundam power station	Stage I Unit 2		Telangana TPP (Stage IV Unit 8, Stage IV Unit 9, Stage V Unit 10, Stage V Unit 11, Stage V Unit 12), Telangana super thermal power project (Stage IV Unit 8, Stage IV Unit 9, Stage V Unit 10, Stage V Unit 11, Stage V Unit 12)	200	operating	1984		subcritical	bituminous					NTPC [100%]	NTPC [100.0%]	18.7585	79.4573	exact	Ramagundam	Ramagundam	Karimnagar	Telangana	https://www.gem.wiki/Ramagundam_power_station	L100000102602	G100000108464	INE733E01010	1	4200		40	2024	2064	2104	0.616567	0	0	0.60966	0	0	0.676943	0	0	0.730439	0	0
coal	India	Asia	Southern Asia	Ramagundam power station	Stage I Unit 3		Telangana TPP (Stage IV Unit 8, Stage IV Unit 9, Stage V Unit 10, Stage V Unit 11, Stage V Unit 12), Telangana super thermal power project (Stage IV Unit 8, Stage IV Unit 9, Stage V Unit 10, Stage V Unit 11, Stage V Unit 12)	200	operating	1984		subcritical	bituminous					NTPC [100%]	NTPC [100.0%]	18.7585	79.4573	exact	Ramagundam	Ramagundam	Karimnagar	Telangana	https://www.gem.wiki/Ramagundam_power_station	L100000102602	G100000108465	INE733E01010	1	4200		40	2024	2064	2104	0.616567	0	0	0.60966	0	0	0.676943	0	0	0.730439	0	0
coal	India	Asia	Southern Asia	Ramagundam power station	Stage II Unit 4		Telangana TPP (Stage IV Unit 8, Stage IV Unit 9, Stage V Unit 10, Stage V Unit 11, Stage V Unit 12), Telangana super thermal power project (Stage IV Unit 8, Stage IV Unit 9, Stage V Unit 10, Stage V Unit 11, Stage V Unit 12)	500	operating	1988		subcritical	bituminous					NTPC [100%]	NTPC [100.0%]	18.7585	79.4573	exact	Ramagundam	Ramagundam	Karimnagar	Telangana	https://www.gem.wiki/Ramagundam_power_station	L100000102602	G100000108466	INE733E01010	1	4200		36	2028	2068	2108	0.616567	0	0	0.60966	0	0	0.676943	0	0	0.730439	0	0
coal	India	Asia	Southern Asia	Ramagundam power station	Stage II Unit 5		Telangana TPP (Stage IV Unit 8, Stage IV Unit 9, Stage V Unit 10, Stage V Unit 11, Stage V Unit 12), Telangana super thermal power project (Stage IV Unit 8, Stage IV Unit 9, Stage V Unit 10, Stage V Unit 11, Stage V Unit 12)	500	operating	1989		subcritical	bituminous					NTPC [100%]	NTPC [100.0%]	18.7585	79.4573	exact	Ramagundam	Ramagundam	Karimnagar	Telangana	https://www.gem.wiki/Ramagundam_power_station	L100000102602	G100000108467	INE733E01010	1	4200		35	2029	2069	2109	0.616567	0	0	0.60966	0	0	0.676943	0	0	0.730439	0	0
coal	India	Asia	Southern Asia	Ramagundam power station	Stage II Unit 6		Telangana TPP (Stage IV Unit 8, Stage IV Unit 9, Stage V Unit 10, Stage V Unit 11, Stage V Unit 12), Telangana super thermal power project (Stage IV Unit 8, Stage IV Unit 9, Stage V Unit 10, Stage V Unit 11, Stage V Unit 12)	500	operating	1989		subcritical	bituminous					NTPC [100%]	NTPC [100.0%]	18.7585	79.4573	exact	Ramagundam	Ramagundam	Karimnagar	Telangana	https://www.gem.wiki/Ramagundam_power_station	L100000102602	G100000108468	INE733E01010	1	4200		35	2029	2069	2109	0.616567	0	0	0.60966	0	0	0.676943	0	0	0.730439	0	0
coal	India	Asia	Southern Asia	Ramagundam power station	Stage III Unit 7		Telangana TPP (Stage IV Unit 8, Stage IV Unit 9, Stage V Unit 10, Stage V Unit 11, Stage V Unit 12), Telangana super thermal power project (Stage IV Unit 8, Stage IV Unit 9, Stage V Unit 10, Stage V Unit 11, Stage V Unit 12)	500	operating	2005		subcritical	bituminous					NTPC [100%]	NTPC [100.0%]	18.7585	79.4573	exact	Ramagundam	Ramagundam	Karimnagar	Telangana	https://www.gem.wiki/Ramagundam_power_station	L100000102602	G100000108469	INE733E01010	1	4200		19	2045	2085	2125	0.616567	0	0	0.60966	0	0	0.676943	0	0	0.730439	0	0
coal	India	Asia	Southern Asia	Ramagundam power station	Stage IV Unit 8		Telangana TPP (Stage IV Unit 8, Stage IV Unit 9, Stage V Unit 10, Stage V Unit 11, Stage V Unit 12), Telangana super thermal power project (Stage IV Unit 8, Stage IV Unit 9, Stage V Unit 10, Stage V Unit 11, Stage V Unit 12)	800	operating	2023		supercritical	unknown					NTPC [100%]	NTPC [100.0%]	18.751	79.4722	exact	Ramagundam	Ramagundam	Karimnagar	Telangana	https://www.gem.wiki/Ramagundam_power_station	L100000102602	G100000108470	INE733E01010	1	4200		1	2063	2103	2143	0.616567	0	0	0.60966	0	0	0.676943	0	0	0.730439	0	0
coal	India	Asia	Southern Asia	Ramagundam power station	Stage IV Unit 9		Telangana TPP (Stage IV Unit 8, Stage IV Unit 9, Stage V Unit 10, Stage V Unit 11, Stage V Unit 12), Telangana super thermal power project (Stage IV Unit 8, Stage IV Unit 9, Stage V Unit 10, Stage V Unit 11, Stage V Unit 12)	800	construction	2024		supercritical	unknown					NTPC [100%]	NTPC [100.0%]	18.751	79.4722	exact	Ramagundam	Ramagundam	Karimnagar	Telangana	https://www.gem.wiki/Ramagundam_power_station	L100000102602	G100000108471	INE733E01010	1	4200	4200	0	2064	2104	2144	0.616567	0	0	0.60966	0	0	0.676943	0	0	0.730439	0	0
coal	Bangladesh	Asia	Southern Asia	Rampal power station	Unit 1		Maitree Super Thermal Power Project, Khulna Large power station, Khulna South power station	660	operating	2022		supercritical	unknown					Bangladesh India Friendship Power Company [100%]	Bangladesh Power Development Board [50.0%]; NTPC Ltd [50.0%]	22.5925	89.5564	exact	Rampal		Bagerhat	Khulna	https://www.gem.wiki/Rampal_power_station	L100000100077	G100000108473	INE733E01010	0.5	1320		2	2062	2102	2142	0.616567	0	0	0.60966	0	0	0.676943	0	0	0.730439	0	0
coal	Bangladesh	Asia	Southern Asia	Rampal power station	Unit 2		Maitree Super Thermal Power Project, Khulna Large power station, Khulna South power station	660	construction	2023		supercritical	unknown					Bangladesh India Friendship Power Company [100%]	Bangladesh Power Development Board [50.0%]; NTPC Ltd [50.0%]	22.5925	89.5564	exact	Rampal		Bagerhat	Khulna	https://www.gem.wiki/Rampal_power_station	L100000100077	G100000108474	INE733E01010	0.5	1320	1320	1	2063	2103	2143	0.616567	0	0	0.60966	0	0	0.676943	0	0	0.730439	0	0
coal	India	Asia	Southern Asia	Rihand power station	Unit 1			500	operating	1988		subcritical	bituminous					NTPC [100%]	NTPC [100.0%]	24.027	82.7915	exact	Rihandnagar	Dudhi	Sonbhadra	Uttar Pradesh	https://www.gem.wiki/Rihand_power_station	L100000102649	G100000108573	INE733E01010	1	3000		36	2028	2068	2108	0.616567	0	0	0.60966	0	0	0.676943	0	0	0.730439	0	0
coal	India	Asia	Southern Asia	Rihand power station	Unit 2			500	operating	1989		subcritical	bituminous					NTPC [100%]	NTPC [100.0%]	24.027	82.7915	exact	Rihandnagar	Dudhi	Sonbhadra	Uttar Pradesh	https://www.gem.wiki/Rihand_power_station	L100000102649	G100000108574	INE733E01010	1	3000		35	2029	2069	2109	0.616567	0	0	0.60966	0	0	0.676943	0	0	0.730439	0	0
coal	India	Asia	Southern Asia	Rihand power station	Unit 3			500	operating	2005		subcritical	bituminous					NTPC [100%]	NTPC [100.0%]	24.027	82.7915	exact	Rihandnagar	Dudhi	Sonbhadra	Uttar Pradesh	https://www.gem.wiki/Rihand_power_station	L100000102649	G100000108575	INE733E01010	1	3000		19	2045	2085	2125	0.616567	0	0	0.60966	0	0	0.676943	0	0	0.730439	0	0
coal	India	Asia	Southern Asia	Rihand power station	Unit 4			500	operating	2005		subcritical	bituminous					NTPC [100%]	NTPC [100.0%]	24.027	82.7915	exact	Rihandnagar	Dudhi	Sonbhadra	Uttar Pradesh	https://www.gem.wiki/Rihand_power_station	L100000102649	G100000108576	INE733E01010	1	3000		19	2045	2085	2125	0.616567	0	0	0.60966	0	0	0.676943	0	0	0.730439	0	0
coal	India	Asia	Southern Asia	Rihand power station	Unit 5			500	operating	2012		subcritical	bituminous					NTPC [100%]	NTPC [100.0%]	24.027	82.7915	exact	Rihandnegar	Dudhi	Sonebhadra	Uttar Pradesh	https://www.gem.wiki/Rihand_power_station	L100000102649	G100000108577	INE733E01010	1	3000		12	2052	2092	2132	0.616567	0	0	0.60966	0	0	0.676943	0	0	0.730439	0	0
coal	India	Asia	Southern Asia	Rihand power station	Unit 6			500	operating	2013		subcritical	bituminous					NTPC [100%]	NTPC [100.0%]	24.027	82.7915	exact	Rihandnegar	Dudhi	Sonebhadra	Uttar Pradesh	https://www.gem.wiki/Rihand_power_station	L100000102649	G100000108578	INE733E01010	1	3000	3000	11	2053	2093	2133	0.616567	0	0	0.60966	0	0	0.676943	0	0	0.730439	0	0
coal	India	Asia	Southern Asia	Rourkela Works-2 power station	Unit 1		Rourkela power station	60	operating	1987		subcritical	bituminous					NTPC-SAIL Power [100%]	NTPC Ltd [50.0%]; Steel Authority of India Ltd [50.0%]	22.221	84.8806	exact	SAIL Rourkela steel mill		Sundargarh	Odisha	https://www.gem.wiki/Rourkela_Works-2_power_station	L100000102494	G100000108643	INE733E01010	0.5	370		37	2027	2067	2107	0.616567	0	0	0.60966	0	0	0.676943	0	0	0.730439	0	0
coal	India	Asia	Southern Asia	Rourkela Works-2 power station	Unit 2		Rourkela power station	60	operating	1988		subcritical	bituminous					NTPC-SAIL Power [100%]	NTPC Ltd [50.0%]; Steel Authority of India Ltd [50.0%]	22.221	84.8806	exact	SAIL Rourkela steel mill		Sundargarh	Odisha	https://www.gem.wiki/Rourkela_Works-2_power_station	L100000102494	G100000108644	INE733E01010	0.5	370		36	2028	2068	2108	0.616567	0	0	0.60966	0	0	0.676943	0	0	0.730439	0	0
coal	India	Asia	Southern Asia	Rourkela Works-2 power station	Unit 3		Rourkela power station	250	operating	2022		subcritical	bituminous					NTPC-SAIL Power [100%]	NTPC Ltd [50.0%]; Steel Authority of India Ltd [50.0%]	22.221	84.8806	exact	SAIL Rourkela steel mill		Sundargarh	Odisha	https://www.gem.wiki/Rourkela_Works-2_power_station	L100000102494	G100000113412	INE733E01010	0.5	370	370	2	2062	2102	2142	0.616567	0	0	0.60966	0	0	0.676943	0	0	0.730439	0	0
coal	India	Asia	Southern Asia	Santaldih Thermal Power Station	Unit 5			250	operating	2007		subcritical	bituminous					NTPC [100%]	NTPC [100.0%]	23.6013	86.4666	exact	Santaldih	Ragunathpur	Purulia	West Bengal	https://www.gem.wiki/Santaldih_Thermal_Power_Station	L100000102686	G100000108812	INE733E01010	1	500		17	2047	2087	2127	0.616567	0	0	0.60966	0	0	0.676943	0	0	0.730439	0	0
coal	India	Asia	Southern Asia	Santaldih Thermal Power Station	Unit 6			250	operating	2011		subcritical	bituminous					NTPC [100%]	NTPC [100.0%]	23.6013	86.4666	exact	Santildih	Ragunathpur	Purulia	West Bengal	https://www.gem.wiki/Santaldih_Thermal_Power_Station	L100000102686	G100000108813	INE733E01010	1	500	500	13	2051	2091	2131	0.616567	0	0	0.60966	0	0	0.676943	0	0	0.730439	0	0
coal	India	Asia	Southern Asia	Simhadri power station	Unit 1			500	operating	2002		subcritical	bituminous					NTPC [100%]	NTPC [100.0%]	17.591	83.0917	exact			Visakhapatnam	Andhra Pradesh	https://www.gem.wiki/Simhadri_power_station	L100000102068	G100000109391	INE733E01010	1	2000		22	2042	2082	2122	0.616567	0	0	0.60966	0	0	0.676943	0	0	0.730439	0	0
coal	India	Asia	Southern Asia	Simhadri power station	Unit 2			500	operating	2002		subcritical	bituminous					NTPC [100%]	NTPC [100.0%]	17.591	83.0917	exact			Visakhapatnam	Andhra Pradesh	https://www.gem.wiki/Simhadri_power_station	L100000102068	G100000109392	INE733E01010	1	2000		22	2042	2082	2122	0.616567	0	0	0.60966	0	0	0.676943	0	0	0.730439	0	0
coal	India	Asia	Southern Asia	Simhadri power station	Unit 3			500	operating	2011		unknown	unknown					NTPC [100%]	NTPC [100.0%]	17.591	83.0917	exact	Vizag		Visakhapatnam	Andhra Pradesh	https://www.gem.wiki/Simhadri_power_station	L100000102068	G100000109393	INE733E01010	1	2000		13	2051	2091	2131	0.616567	0	0	0.60966	0	0	0.676943	0	0	0.730439	0	0
coal	India	Asia	Southern Asia	Simhadri power station	Unit 4			500	operating	2012		unknown	unknown					NTPC [100%]	NTPC [100.0%]	17.591	83.0917	exact	Vizag		Visakhapatnam	Andhra Pradesh	https://www.gem.wiki/Simhadri_power_station	L100000102068	G100000109394	INE733E01010	1	2000	2000	12	2052	2092	2132	0.616567	0	0	0.60966	0	0	0.676943	0	0	0.730439	0	0
coal	India	Asia	Southern Asia	Singrauli Super Thermal Power Station	Unit 1			200	operating	1982		subcritical	bituminous					NTPC [100%]	NTPC [100.0%]	24.1042	82.7064	exact	Shaktinagar	Dudhi	Sonbhadra	Uttar Pradesh	https://www.gem.wiki/Singrauli_Super_Thermal_Power_Station	L100000102652	G100000109413	INE733E01010	1	3600		42	2022	2062	2102	0.616567	0	0	0.60966	0	0	0.676943	0	0	0.730439	0	0
coal	India	Asia	Southern Asia	Singrauli Super Thermal Power Station	Unit 2			200	operating	1982		subcritical	bituminous					NTPC [100%]	NTPC [100.0%]	24.1042	82.7064	exact	Shaktinagar	Dudhi	Sonbhadra	Uttar Pradesh	https://www.gem.wiki/Singrauli_Super_Thermal_Power_Station	L100000102652	G100000109414	INE733E01010	1	3600		42	2022	2062	2102	0.616567	0	0	0.60966	0	0	0.676943	0	0	0.730439	0	0
coal	India	Asia	Southern Asia	Singrauli Super Thermal Power Station	Unit 3			200	operating	1983		subcritical	bituminous					NTPC [100%]	NTPC [100.0%]	24.1042	82.7064	exact	Shaktinagar	Dudhi	Sonbhadra	Uttar Pradesh	https://www.gem.wiki/Singrauli_Super_Thermal_Power_Station	L100000102652	G100000109415	INE733E01010	1	3600		41	2023	2063	2103	0.616567	0	0	0.60966	0	0	0.676943	0	0	0.730439	0	0
coal	India	Asia	Southern Asia	Singrauli Super Thermal Power Station	Unit 4			200	operating	1983		subcritical	bituminous					NTPC [100%]	NTPC [100.0%]	24.1042	82.7064	exact	Shaktinagar	Dudhi	Sonbhadra	Uttar Pradesh	https://www.gem.wiki/Singrauli_Super_Thermal_Power_Station	L100000102652	G100000109416	INE733E01010	1	3600		41	2023	2063	2103	0.616567	0	0	0.60966	0	0	0.676943	0	0	0.730439	0	0
coal	India	Asia	Southern Asia	Singrauli Super Thermal Power Station	Unit 5			200	operating	1984		subcritical	bituminous					NTPC [100%]	NTPC [100.0%]	24.1042	82.7064	exact	Shaktinagar	Dudhi	Sonbhadra	Uttar Pradesh	https://www.gem.wiki/Singrauli_Super_Thermal_Power_Station	L100000102652	G100000109417	INE733E01010	1	3600		40	2024	2064	2104	0.616567	0	0	0.60966	0	0	0.676943	0	0	0.730439	0	0
coal	India	Asia	Southern Asia	Singrauli Super Thermal Power Station	Unit 6			500	operating	1986		subcritical	bituminous					NTPC [100%]	NTPC [100.0%]	24.1042	82.7064	exact	Shaktinagar	Dudhi	Sonbhadra	Uttar Pradesh	https://www.gem.wiki/Singrauli_Super_Thermal_Power_Station	L100000102652	G100000109418	INE733E01010	1	3600		38	2026	2066	2106	0.616567	0	0	0.60966	0	0	0.676943	0	0	0.730439	0	0
coal	India	Asia	Southern Asia	Singrauli Super Thermal Power Station	Unit 7			500	operating	1987		subcritical	bituminous					NTPC [100%]	NTPC [100.0%]	24.1042	82.7064	exact	Shaktinagar	Dudhi	Sonbhadra	Uttar Pradesh	https://www.gem.wiki/Singrauli_Super_Thermal_Power_Station	L100000102652	G100000109419	INE733E01010	1	3600		37	2027	2067	2107	0.616567	0	0	0.60966	0	0	0.676943	0	0	0.730439	0	0
coal	India	Asia	Southern Asia	Singrauli Super Thermal Power Station	Unit 8			800	permitted			supercritical	unknown					NTPC [100%]	NTPC [100.0%]	24.1042	82.7064	exact			Sonebhadra	Uttar Pradesh	https://www.gem.wiki/Singrauli_Super_Thermal_Power_Station	L100000102652	G100000109420	INE733E01010	1	3600		-99	40	80	120	0.616567	0	0	0.60966	0	0	0.676943	0	0	0.730439	0	0
coal	India	Asia	Southern Asia	Singrauli Super Thermal Power Station	Unit 9			800	permitted			supercritical	unknown					NTPC [100%]	NTPC [100.0%]	24.1042	82.7064	exact			Sonebhadra	Uttar Pradesh	https://www.gem.wiki/Singrauli_Super_Thermal_Power_Station	L100000102652	G100000112789	INE733E01010	1	3600	3600	-99	40	80	120	0.616567	0	0	0.60966	0	0	0.676943	0	0	0.730439	0	0
coal	India	Asia	Southern Asia	Sipat power station	Unit 4		Rajiv Gandhi STPS power station	500	operating	2007		subcritical	unknown					NTPC [100%]	NTPC [100.0%]	22.1317	82.2904	exact	Sipat		Bilaspur	Chhattisgarh	https://www.gem.wiki/Sipat_power_station	L100000102185	G100000109453	INE733E01010	1	3780		17	2047	2087	2127	0.616567	0	0	0.60966	0	0	0.676943	0	0	0.730439	0	0
coal	India	Asia	Southern Asia	Sipat power station	Unit 5		Rajiv Gandhi STPS power station	500	operating	2008		subcritical	unknown					NTPC [100%]	NTPC [100.0%]	22.1317	82.2904	exact	Sipat		Bilaspur	Chhattisgarh	https://www.gem.wiki/Sipat_power_station	L100000102185	G100000109454	INE733E01010	1	3780		16	2048	2088	2128	0.616567	0	0	0.60966	0	0	0.676943	0	0	0.730439	0	0
coal	India	Asia	Southern Asia	Sipat power station	Unit 1		Rajiv Gandhi STPS power station	660	operating	2011		supercritical	unknown					NTPC [100%]	NTPC [100.0%]	22.1317	82.2904	exact	Sipat		Bilaspur	Chhattisgarh	https://www.gem.wiki/Sipat_power_station	L100000102185	G100000109450	INE733E01010	1	3780		13	2051	2091	2131	0.616567	0	0	0.60966	0	0	0.676943	0	0	0.730439	0	0
coal	India	Asia	Southern Asia	Sipat power station	Unit 2		Rajiv Gandhi STPS power station	660	operating	2011		supercritical	unknown					NTPC [100%]	NTPC [100.0%]	22.1317	82.2904	exact	Sipat		Bilaspur	Chhattisgarh	https://www.gem.wiki/Sipat_power_station	L100000102185	G100000109451	INE733E01010	1	3780		13	2051	2091	2131	0.616567	0	0	0.60966	0	0	0.676943	0	0	0.730439	0	0
coal	India	Asia	Southern Asia	Sipat power station	Unit 3		Rajiv Gandhi STPS power station	660	operating	2012		supercritical	unknown					NTPC [100%]	NTPC [100.0%]	22.1317	82.2904	exact	Sipat		Bilaspur	Chhattisgarh	https://www.gem.wiki/Sipat_power_station	L100000102185	G100000109452	INE733E01010	1	3780		12	2052	2092	2132	0.616567	0	0	0.60966	0	0	0.676943	0	0	0.730439	0	0
coal	India	Asia	Southern Asia	Sipat power station	Unit 6		Rajiv Gandhi STPS power station	800	pre-permit	2029		ultra-supercritical	unknown					NTPC [100%]	NTPC [100.0%]	22.1317	82.2904	exact	Sipat		Bilaspur	Chhattisgarh	https://www.gem.wiki/Sipat_power_station	L100000102185	G100000114226	INE733E01010	1	3780	3780	-5	2069	2109	2149	0.616567	0	0	0.60966	0	0	0.676943	0	0	0.730439	0	0
coal	India	Asia	Southern Asia	Solapur power station	Unit 1			660	operating	2017		supercritical	unknown					NTPC [100%]	NTPC [100.0%]	17.5513	75.9832	exact	Fatatewadi & Ahirwadi	South Solarpur	Solarpur	Maharashtra	https://www.gem.wiki/Solapur_power_station	L100000102431	G100000109490	INE733E01010	1	1320		7	2057	2097	2137	0.616567	0	0	0.60966	0	0	0.676943	0	0	0.730439	0	0
coal	India	Asia	Southern Asia	Solapur power station	Unit 2			660	operating	2019		supercritical	unknown					NTPC [100%]	NTPC [100.0%]	17.5513	75.9832	exact	Fatatewadi & Ahirwadi	South Solarpur	Solarpur	Maharashtra	https://www.gem.wiki/Solapur_power_station	L100000102431	G100000109491	INE733E01010	1	1320	1320	5	2059	2099	2139	0.616567	0	0	0.60966	0	0	0.676943	0	0	0.730439	0	0
coal	India	Asia	Southern Asia	Talcher Kaniha Super Thermal Power Station	Stage I Unit 1		Talcher STPS	500	operating	1995		subcritical	bituminous					NTPC [100%]	NTPC [100.0%]	21.0971	85.075	exact	Kaniha	Talcher	Angul	Odisha	https://www.gem.wiki/Talcher_Kaniha_Super_Thermal_Power_Station	L100000102502	G100000109879	INE733E01010	1	3000		29	2035	2075	2115	0.616567	0	0	0.60966	0	0	0.676943	0	0	0.730439	0	0
coal	India	Asia	Southern Asia	Talcher Kaniha Super Thermal Power Station	Stage I Unit 2		Talcher STPS	500	operating	1996		subcritical	bituminous					NTPC [100%]	NTPC [100.0%]	21.0971	85.075	exact	Kaniha	Talcher	Angul	Odisha	https://www.gem.wiki/Talcher_Kaniha_Super_Thermal_Power_Station	L100000102502	G100000109880	INE733E01010	1	3000		28	2036	2076	2116	0.616567	0	0	0.60966	0	0	0.676943	0	0	0.730439	0	0
coal	India	Asia	Southern Asia	Talcher Kaniha Super Thermal Power Station	Stage II Unit 3		Talcher STPS	500	operating	2003		subcritical	bituminous					NTPC [100%]	NTPC [100.0%]	21.0971	85.075	exact	Kaniha	Talcher	Angul	Odisha	https://www.gem.wiki/Talcher_Kaniha_Super_Thermal_Power_Station	L100000102502	G100000109881	INE733E01010	1	3000		21	2043	2083	2123	0.616567	0	0	0.60966	0	0	0.676943	0	0	0.730439	0	0
coal	India	Asia	Southern Asia	Talcher Kaniha Super Thermal Power Station	Stage II Unit 4		Talcher STPS	500	operating	2003		subcritical	bituminous					NTPC [100%]	NTPC [100.0%]	21.0971	85.075	exact	Kaniha	Talcher	Angul	Odisha	https://www.gem.wiki/Talcher_Kaniha_Super_Thermal_Power_Station	L100000102502	G100000109882	INE733E01010	1	3000		21	2043	2083	2123	0.616567	0	0	0.60966	0	0	0.676943	0	0	0.730439	0	0
coal	India	Asia	Southern Asia	Talcher Kaniha Super Thermal Power Station	Stage II Unit 5		Talcher STPS	500	operating	2005		subcritical	bituminous					NTPC [100%]	NTPC [100.0%]	21.0971	85.075	exact	Kaniha	Talcher	Angul	Odisha	https://www.gem.wiki/Talcher_Kaniha_Super_Thermal_Power_Station	L100000102502	G100000109883	INE733E01010	1	3000		19	2045	2085	2125	0.616567	0	0	0.60966	0	0	0.676943	0	0	0.730439	0	0
coal	India	Asia	Southern Asia	Talcher Kaniha Super Thermal Power Station	Stage II Unit 6		Talcher STPS	500	operating	2006		subcritical	bituminous					NTPC [100%]	NTPC [100.0%]	21.0971	85.075	exact	Kaniha	Talcher	Angul	Odisha	https://www.gem.wiki/Talcher_Kaniha_Super_Thermal_Power_Station	L100000102502	G100000109884	INE733E01010	1	3000	3000	18	2046	2086	2126	0.616567	0	0	0.60966	0	0	0.676943	0	0	0.730439	0	0
coal	India	Asia	Southern Asia	Talcher power station	Unit A1		Talcher-A power station Unit 1 (Unit A1), Talcher-A power station Unit 2 (Unit A2), Talcher-A power station Unit 3 (Unit A3), Talcher-A power station Unit 4 (Unit A4), Talcher-B power station Unit 1 (Unit B5), Talcher-B power station Unit 2 (Unit B6)	60	retired	1967	2021	subcritical	bituminous					NTPC [100%]	NTPC [100.0%]	20.9111	85.2072	exact	Digi	Talcher	Angul	Odisha	https://www.gem.wiki/Talcher_power_station	L100000102504	G100000109889	INE733E01010	1	1780		57	2007	2047	2087	0.616567	0	0	0.60966	0	0	0.676943	0	0	0.730439	0	0
coal	India	Asia	Southern Asia	Talcher power station	Unit A2		Talcher-A power station Unit 1 (Unit A1), Talcher-A power station Unit 2 (Unit A2), Talcher-A power station Unit 3 (Unit A3), Talcher-A power station Unit 4 (Unit A4), Talcher-B power station Unit 1 (Unit B5), Talcher-B power station Unit 2 (Unit B6)	60	retired	1968	2021	subcritical	bituminous					NTPC [100%]	NTPC [100.0%]	20.9111	85.2072	exact	Digi	Talcher	Angul	Odisha	https://www.gem.wiki/Talcher_power_station	L100000102504	G100000109890	INE733E01010	1	1780		56	2008	2048	2088	0.616567	0	0	0.60966	0	0	0.676943	0	0	0.730439	0	0
coal	India	Asia	Southern Asia	Talcher power station	Unit A3		Talcher-A power station Unit 1 (Unit A1), Talcher-A power station Unit 2 (Unit A2), Talcher-A power station Unit 3 (Unit A3), Talcher-A power station Unit 4 (Unit A4), Talcher-B power station Unit 1 (Unit B5), Talcher-B power station Unit 2 (Unit B6)	60	retired	1968	2021	subcritical	bituminous					NTPC [100%]	NTPC [100.0%]	20.9111	85.2072	exact	Digi	Talcher	Angul	Odisha	https://www.gem.wiki/Talcher_power_station	L100000102504	G100000109891	INE733E01010	1	1780		56	2008	2048	2088	0.616567	0	0	0.60966	0	0	0.676943	0	0	0.730439	0	0
coal	India	Asia	Southern Asia	Talcher power station	Unit A4		Talcher-A power station Unit 1 (Unit A1), Talcher-A power station Unit 2 (Unit A2), Talcher-A power station Unit 3 (Unit A3), Talcher-A power station Unit 4 (Unit A4), Talcher-B power station Unit 1 (Unit B5), Talcher-B power station Unit 2 (Unit B6)	60	retired	1969	2021	subcritical	bituminous					NTPC [100%]	NTPC [100.0%]	20.9111	85.2072	exact	Digi	Talcher	Angul	Odisha	https://www.gem.wiki/Talcher_power_station	L100000102504	G100000109892	INE733E01010	1	1780		55	2009	2049	2089	0.616567	0	0	0.60966	0	0	0.676943	0	0	0.730439	0	0
coal	India	Asia	Southern Asia	Talcher power station	Unit B5		Talcher-A power station Unit 1 (Unit A1), Talcher-A power station Unit 2 (Unit A2), Talcher-A power station Unit 3 (Unit A3), Talcher-A power station Unit 4 (Unit A4), Talcher-B power station Unit 1 (Unit B5), Talcher-B power station Unit 2 (Unit B6)	110	retired	1982	2021	subcritical	bituminous					NTPC [100%]	NTPC [100.0%]	20.9111	85.2072	exact	Digi	Talcher	Angul	Odisha	https://www.gem.wiki/Talcher_power_station	L100000102504	G100000109893	INE733E01010	1	1780		42	2022	2062	2102	0.616567	0	0	0.60966	0	0	0.676943	0	0	0.730439	0	0
coal	India	Asia	Southern Asia	Talcher power station	Unit B6		Talcher-A power station Unit 1 (Unit A1), Talcher-A power station Unit 2 (Unit A2), Talcher-A power station Unit 3 (Unit A3), Talcher-A power station Unit 4 (Unit A4), Talcher-B power station Unit 1 (Unit B5), Talcher-B power station Unit 2 (Unit B6)	110	retired	1983	2021	subcritical	bituminous					NTPC [100%]	NTPC [100.0%]	20.9111	85.2072	exact	Digi	Talcher	Angul	Odisha	https://www.gem.wiki/Talcher_power_station	L100000102504	G100000109894	INE733E01010	1	1780		41	2023	2063	2103	0.616567	0	0	0.60966	0	0	0.676943	0	0	0.730439	0	0
coal	India	Asia	Southern Asia	Talcher power station	Stage III Unit 1		Talcher-A power station Unit 1 (Unit A1), Talcher-A power station Unit 2 (Unit A2), Talcher-A power station Unit 3 (Unit A3), Talcher-A power station Unit 4 (Unit A4), Talcher-B power station Unit 1 (Unit B5), Talcher-B power station Unit 2 (Unit B6)	660	construction	2026		ultra-supercritical	bituminous					NTPC [100%]	NTPC [100.0%]	20.9111	85.2072	exact	Kaniha		Angul	Odisha	https://www.gem.wiki/Talcher_power_station	L100000102504	G100000109887	INE733E01010	1	1780		-2	2066	2106	2146	0.616567	0	0	0.60966	0	0	0.676943	0	0	0.730439	0	0
coal	India	Asia	Southern Asia	Talcher power station	Stage III Unit 2		Talcher-A power station Unit 1 (Unit A1), Talcher-A power station Unit 2 (Unit A2), Talcher-A power station Unit 3 (Unit A3), Talcher-A power station Unit 4 (Unit A4), Talcher-B power station Unit 1 (Unit B5), Talcher-B power station Unit 2 (Unit B6)	660	construction	2027		ultra-supercritical	bituminous					NTPC [100%]	NTPC [100.0%]	20.9111	85.2072	exact	Kaniha		Angul	Odisha	https://www.gem.wiki/Talcher_power_station	L100000102504	G100000109888	INE733E01010	1	1780	1780	-3	2067	2107	2147	0.616567	0	0	0.60966	0	0	0.676943	0	0	0.730439	0	0
coal	India	Asia	Southern Asia	Tanda power station	Unit 1			110	operating	1988		subcritical	bituminous					NTPC [100%]	NTPC [100.0%]	26.5895	82.6012	exact	Bahadurgarh	Tanda	Ambedkarnagar	Uttar Pradesh	https://www.gem.wiki/Tanda_power_station	L100000102653	G100000109926	INE733E01010	1	1760		36	2028	2068	2108	0.616567	0	0	0.60966	0	0	0.676943	0	0	0.730439	0	0
coal	India	Asia	Southern Asia	Tanda power station	Unit 2			110	operating	1989		subcritical	bituminous					NTPC [100%]	NTPC [100.0%]	26.5895	82.6012	exact	Bahadurgarh	Tanda	Ambedkarnagar	Uttar Pradesh	https://www.gem.wiki/Tanda_power_station	L100000102653	G100000109927	INE733E01010	1	1760		35	2029	2069	2109	0.616567	0	0	0.60966	0	0	0.676943	0	0	0.730439	0	0
coal	India	Asia	Southern Asia	Tanda power station	Unit 3			110	operating	1990		subcritical	bituminous					NTPC [100%]	NTPC [100.0%]	26.5895	82.6012	exact	Bahadurgarh	Tanda	Ambedkarnagar	Uttar Pradesh	https://www.gem.wiki/Tanda_power_station	L100000102653	G100000109928	INE733E01010	1	1760		34	2030	2070	2110	0.616567	0	0	0.60966	0	0	0.676943	0	0	0.730439	0	0
coal	India	Asia	Southern Asia	Tanda power station	Unit 4			110	operating	1998		subcritical	bituminous					NTPC [100%]	NTPC [100.0%]	26.5895	82.6012	exact	Bahadurgarh	Tanda	Ambedkarnagar	Uttar Pradesh	https://www.gem.wiki/Tanda_power_station	L100000102653	G100000109929	INE733E01010	1	1760		26	2038	2078	2118	0.616567	0	0	0.60966	0	0	0.676943	0	0	0.730439	0	0
coal	India	Asia	Southern Asia	Tanda power station	Unit 5			660	operating	2019		supercritical	unknown					NTPC [100%]	NTPC [100.0%]	26.5892	82.6004	exact	Bahadurgarh	Tanda	Ambedkarnagar	Uttar Pradesh	https://www.gem.wiki/Tanda_power_station	L100000102653	G100000109924	INE733E01010	1	1760		5	2059	2099	2139	0.616567	0	0	0.60966	0	0	0.676943	0	0	0.730439	0	0
coal	India	Asia	Southern Asia	Tanda power station	Unit 6			660	operating	2021		supercritical	unknown					NTPC [100%]	NTPC [100.0%]	26.5892	82.6004	exact	Bahadurgarh	Tanda	Ambedkarnagar	Uttar Pradesh	https://www.gem.wiki/Tanda_power_station	L100000102653	G100000109925	INE733E01010	1	1760	1760	3	2061	2101	2141	0.616567	0	0	0.60966	0	0	0.676943	0	0	0.730439	0	0
coal	India	Asia	Southern Asia	Vallur Thermal Power Plant	Unit 1			500	operating	2012		subcritical	unknown					NTPC Tamil Nadu Energy [100%]	NTPC Ltd [50.0%]; TNEB Ltd	13.2371	80.3018	exact	Vallur	Ponneri	Thiruvallur	Tamil Nadu	https://www.gem.wiki/Vallur_Thermal_Power_Plant	L100000102590	G100000110544	INE733E01010	0.5	1500		12	2052	2092	2132	0.616567	0	0	0.60966	0	0	0.676943	0	0	0.730439	0	0
coal	India	Asia	Southern Asia	Vallur Thermal Power Plant	Unit 2			500	operating	2013		subcritical	unknown					NTPC Tamil Nadu Energy [100%]	NTPC Ltd [50.0%]; TNEB Ltd	13.2371	80.3018	exact	Vallur	Ponneri	Thiruvallur	Tamil Nadu	https://www.gem.wiki/Vallur_Thermal_Power_Plant	L100000102590	G100000110545	INE733E01010	0.5	1500		11	2053	2093	2133	0.616567	0	0	0.60966	0	0	0.676943	0	0	0.730439	0	0
coal	India	Asia	Southern Asia	Vallur Thermal Power Plant	Unit 3			500	operating	2014		subcritical	unknown					NTPC Tamil Nadu Energy [100%]	NTPC Ltd [50.0%]; TNEB Ltd	13.2371	80.3018	exact	Vallur	Ponneri	Thiruvallur	Tamil Nadu	https://www.gem.wiki/Vallur_Thermal_Power_Plant	L100000102590	G100000110546	INE733E01010	0.5	1500	1500	10	2054	2094	2134	0.616567	0	0	0.60966	0	0	0.676943	0	0	0.730439	0	0
coal	India	Asia	Southern Asia	Vindhyachal power station	Phase 1 Unit 1			210	operating	1987		subcritical	bituminous					NTPC [100%]	NTPC [100.0%]	24.0983	82.6719	exact	Waidhan	Singrauli	Singrauli	Madhya Pradesh	https://www.gem.wiki/Vindhyachal_power_station	L100000102371	G100000110598	INE733E01010	1	4760		37	2027	2067	2107	0.616567	0	0	0.60966	0	0	0.676943	0	0	0.730439	0	0
coal	India	Asia	Southern Asia	Vindhyachal power station	Phase 1 Unit 2			210	operating	1988		subcritical	bituminous					NTPC [100%]	NTPC [100.0%]	24.0983	82.6719	exact	Waidhan	Singrauli	Singrauli	Madhya Pradesh	https://www.gem.wiki/Vindhyachal_power_station	L100000102371	G100000110599	INE733E01010	1	4760		36	2028	2068	2108	0.616567	0	0	0.60966	0	0	0.676943	0	0	0.730439	0	0
coal	India	Asia	Southern Asia	Vindhyachal power station	Phase 1 Unit 3			210	operating	1989		subcritical	bituminous					NTPC [100%]	NTPC [100.0%]	24.0983	82.6719	exact	Waidhan	Singrauli	Singrauli	Madhya Pradesh	https://www.gem.wiki/Vindhyachal_power_station	L100000102371	G100000110600	INE733E01010	1	4760		35	2029	2069	2109	0.616567	0	0	0.60966	0	0	0.676943	0	0	0.730439	0	0
coal	India	Asia	Southern Asia	Vindhyachal power station	Phase 1 Unit 4			210	operating	1989		subcritical	bituminous					NTPC [100%]	NTPC [100.0%]	24.0983	82.6719	exact	Waidhan	Singrauli	Singrauli	Madhya Pradesh	https://www.gem.wiki/Vindhyachal_power_station	L100000102371	G100000110601	INE733E01010	1	4760		35	2029	2069	2109	0.616567	0	0	0.60966	0	0	0.676943	0	0	0.730439	0	0
coal	India	Asia	Southern Asia	Vindhyachal power station	Phase 1 Unit 5			210	operating	1990		subcritical	bituminous					NTPC [100%]	NTPC [100.0%]	24.0983	82.6719	exact	Waidhan	Singrauli	Singrauli	Madhya Pradesh	https://www.gem.wiki/Vindhyachal_power_station	L100000102371	G100000110602	INE733E01010	1	4760		34	2030	2070	2110	0.616567	0	0	0.60966	0	0	0.676943	0	0	0.730439	0	0
coal	India	Asia	Southern Asia	Vindhyachal power station	Phase 1 Unit 6			210	operating	1991		subcritical	bituminous					NTPC [100%]	NTPC [100.0%]	24.0983	82.6719	exact	Waidhan	Singrauli	Singrauli	Madhya Pradesh	https://www.gem.wiki/Vindhyachal_power_station	L100000102371	G100000110603	INE733E01010	1	4760		33	2031	2071	2111	0.616567	0	0	0.60966	0	0	0.676943	0	0	0.730439	0	0
coal	India	Asia	Southern Asia	Vindhyachal power station	Phase 2 Unit 1			500	operating	1999		subcritical	bituminous					NTPC [100%]	NTPC [100.0%]	24.0983	82.6719	exact	Waidhan	Singrauli	Singrauli	Madhya Pradesh	https://www.gem.wiki/Vindhyachal_power_station	L100000102371	G100000110604	INE733E01010	1	4760		25	2039	2079	2119	0.616567	0	0	0.60966	0	0	0.676943	0	0	0.730439	0	0
coal	India	Asia	Southern Asia	Vindhyachal power station	Phase 2 Unit 2			500	operating	2000		subcritical	bituminous					NTPC [100%]	NTPC [100.0%]	24.0983	82.6719	exact	Waidhan	Singrauli	Singrauli	Madhya Pradesh	https://www.gem.wiki/Vindhyachal_power_station	L100000102371	G100000110605	INE733E01010	1	4760		24	2040	2080	2120	0.616567	0	0	0.60966	0	0	0.676943	0	0	0.730439	0	0
coal	India	Asia	Southern Asia	Vindhyachal power station	Phase 3 Unit 1			500	operating	2006		subcritical	bituminous					NTPC [100%]	NTPC [100.0%]	24.0983	82.6719	exact	Waidhan	Singrauli	Singrauli	Madhya Pradesh	https://www.gem.wiki/Vindhyachal_power_station	L100000102371	G100000110606	INE733E01010	1	4760		18	2046	2086	2126	0.616567	0	0	0.60966	0	0	0.676943	0	0	0.730439	0	0
coal	India	Asia	Southern Asia	Vindhyachal power station	Phase 3 Unit 2			500	operating	2007		subcritical	bituminous					NTPC [100%]	NTPC [100.0%]	24.0983	82.6719	exact	Waidhan	Singrauli	Singrauli	Madhya Pradesh	https://www.gem.wiki/Vindhyachal_power_station	L100000102371	G100000110607	INE733E01010	1	4760		17	2047	2087	2127	0.616567	0	0	0.60966	0	0	0.676943	0	0	0.730439	0	0
coal	India	Asia	Southern Asia	Vindhyachal power station	Phase IV unit 11			500	operating	2012		subcritical	bituminous					NTPC [100%]	NTPC [100.0%]	24.0983	82.6719	exact	Waidhan	Waidhan	Singrauli	Madhya Pradesh	https://www.gem.wiki/Vindhyachal_power_station	L100000102371	G100000110608	INE733E01010	1	4760		12	2052	2092	2132	0.616567	0	0	0.60966	0	0	0.676943	0	0	0.730439	0	0
coal	India	Asia	Southern Asia	Vindhyachal power station	Phase IV units 12			500	operating	2013		subcritical	bituminous					NTPC [100%]	NTPC [100.0%]	24.0983	82.6719	exact	Waidhan	Waidhan	Singrauli	Madhya Pradesh	https://www.gem.wiki/Vindhyachal_power_station	L100000102371	G100000110609	INE733E01010	1	4760		11	2053	2093	2133	0.616567	0	0	0.60966	0	0	0.676943	0	0	0.730439	0	0
coal	India	Asia	Southern Asia	Vindhyachal power station	Phase V Unit 13			500	operating	2015		subcritical	bituminous					NTPC [100%]	NTPC [100.0%]	24.0983	82.6719	exact	Waidhan	Waidhan	Singrauli	Madhya Pradesh	https://www.gem.wiki/Vindhyachal_power_station	L100000102371	G100000110610	INE733E01010	1	4760	4760	9	2055	2095	2135	0.616567	0	0	0.60966	0	0	0.676943	0	0	0.730439	0	0
oil/gas	India	Asia	Southern Asia	Anta power plant	1-4		Anta Thermal power station	419.33	operating	1989		CC	NG					NTPC Ltd [100.0%]	NTPC Ltd [100.0%]	25.1797	76.3188	exact	Anta			Rajasthan	https://www.gem.wiki/Anta_power_plant	L100000401464	G100000401434	INE733E01010	1	419.33	419.33	35	2029	2069	2109	0	0.161949	0	0	0.197365	0	0	0.150781	0	0	0.0908193	0
oil/gas	India	Asia	Southern Asia	Auraiya Combined Cycle power plant	1-6			663	operating	1990		CC	NG					NTPC Ltd [100.0%]	NTPC Ltd [100.0%]	26.6282	79.5286	exact	Auraiya			Uttar Pradesh	https://www.gem.wiki/Auraiya_Combined_Cycle_power_plant	L100000401466	G100000401436	INE733E01010	1	663	663	34	2030	2070	2110	0	0.161949	0	0	0.197365	0	0	0.150781	0	0	0.0908193	0
oil/gas	India	Asia	Southern Asia	Dadri Combined Cycle power plant	1-6			829.78	operating	1994		CC	NG/D					NTPC Ltd [100.0%]	NTPC Ltd [100.0%]	28.5932	77.6101	exact	Gautam Budh Nagar			Uttar Pradesh	https://www.gem.wiki/Dadri_Combined_Cycle_power_plant	L100000401465	G100000401435	INE733E01010	1	829.78	829.78	30	2034	2074	2114	0	0.161949	0	0	0.197365	0	0	0.150781	0	0	0.0908193	0
oil/gas	India	Asia	Southern Asia	Faridabad Combined Cycle power plant	1-3			431.59	operating	2000		CC	NG/N/D					NTPC Ltd [100.0%]	NTPC Ltd [100.0%]	28.3465	77.359	exact	Faridabad District			Haryana	https://www.gem.wiki/Faridabad_Combined_Cycle_power_plant	L100000401463	G100000401433	INE733E01010	1	431.59	431.59	24	2040	2080	2120	0	0.161949	0	0	0.197365	0	0	0.150781	0	0	0.0908193	0
oil/gas	India	Asia	Southern Asia	Hope Town power station	1			50	announced			not found	LNG/D					NTPC Ltd [100.0%]	NTPC Ltd [100.0%]	11.7061	92.7368	approximate	Ferrargunj Tehsil		South Andaman district	Andaman & Nicobar Is	https://www.gem.wiki/Hope_Town_power_station	L100000408394	G100000411776	INE733E01010	1	50	50	-99	40	80	120	0	0.161949	0	0	0.197365	0	0	0.150781	0	0	0.0908193	0
oil/gas	India	Asia	Southern Asia	Jhanor Gandhar Combined Cycle power plant	1-4			657	operating	1995		CC	NG					NTPC Ltd [100.0%]	NTPC Ltd [100.0%]	21.8242	73.1136	exact	Bharuch			Gujarat	https://www.gem.wiki/Jhanor_Gandhar_Combined_Cycle_power_plant	L100000401489	G100000401459	INE733E01010	1	657	657	29	2035	2075	2115	0	0.161949	0	0	0.197365	0	0	0.150781	0	0	0.0908193	0
oil/gas	India	Asia	Southern Asia	Kawas Combined Cycle power plant	1-6			656	operating	1993		CC	NG					NTPC Ltd [100.0%]	NTPC Ltd [100.0%]	21.175	72.6879	exact	Surat			Gujarat	https://www.gem.wiki/Kawas_Combined_Cycle_power_plant	L100000401490	G100000401460	INE733E01010	1	656	656	31	2033	2073	2113	0	0.161949	0	0	0.197365	0	0	0.150781	0	0	0.0908193	0
oil/gas	India	Asia	Southern Asia	Kayamkulam Gas power plant	1		Rajiv Gandhi CCPP	350	operating	1999		CC	NG/N					NTPC Ltd [100.0%]	NTPC Ltd [100.0%]	9.2072	76.4342	approximate	Kayamkulam - Alappuzha Dist			Kerala	https://www.gem.wiki/Kayamkulam_Gas_power_plant	L100000407598	G100000409915	INE733E01010	1	350	350	25	2039	2079	2119	0	0.161949	0	0	0.197365	0	0	0.150781	0	0	0.0908193	0
Type	Country/area	Region	Subregion	Plant / Project name	Unit / Phase name	Plant / Project name (local)	Plant / Project name (other)	Capacity (MW)	Status	Start year	Retired year	Technology	Fuel	Country/area 1 (hydropower only)	Country/area 2 (hydropower only)	Country/area 1 Capacity (MW) (hydropower only)	Country/area 2 Capacity (MW) (hydropower only)	Owner	Parent	Latitude	Longitude	Location accuracy	City	Local area (taluk, county)	Major area (prefecture, district)	Subnational unit (state, province)	GEM.Wiki URL	GEM location ID	GEM unit/phase ID	CompISIN	Ownership	Plant capacity	Plant capacity	Age	Reinvestment year	Reinvestment year	Reinvestment year	2020	2021	2022	2023	2024	2025	2026	2027	2028	2029	2030	2031
coal	India	Asia	Southern Asia	Anpara-E power station (MUNPL)	Unit 1			800	announced			supercritical	unknown					Meja Urja Nigam	NTPC Ltd; Uttar Pradesh Rajya Vidyut Utpadan Nigam Ltd	24.2046	82.7827	approximate	Anpara		Sonbhadra District	Uttar Pradesh	https://www.gem.wiki/Anpara-E_power_station_(MUNPL)	L100001000082	G100001000203	INE733E01010	0.5	1600		-99	40	80	120	0	0	0	0	0	0	0	0	0	2.54452e+06	2.54452e+06	2.54452e+06
coal	India	Asia	Southern Asia	Anpara-E power station (MUNPL)	Unit 2			800	announced			supercritical	unknown					Meja Urja Nigam	NTPC Ltd; Uttar Pradesh Rajya Vidyut Utpadan Nigam Ltd	24.2046	82.7827	approximate	Anpara		Sonbhadra District	Uttar Pradesh	https://www.gem.wiki/Anpara-E_power_station_(MUNPL)	L100001000082	G100001000204	INE733E01010	0.5	1600	1600	-99	40	80	120	0	0	0	0	0	0	0	0	0	2.54452e+06	2.54452e+06	2.54452e+06
coal	India	Asia	Southern Asia	Barh I power station	Unit 1		Barh STPP	660	operating	2021		supercritical	unknown					NTPC [100%]	NTPC [100.0%]	25.4693	85.7452	exact	Barh		Patna	Bihar	https://www.gem.wiki/Barh_I_power_station	L100000102092	G100000100623	INE733E01010	1	1980		3	2061	2101	2141	0	3.88764e+06	4.31668e+06	4.65781e+06	4.19845e+06	4.19845e+06	4.19845e+06	4.19845e+06	4.19845e+06	4.19845e+06	4.19845e+06	4.19845e+06
coal	India	Asia	Southern Asia	Barh I power station	Unit 2		Barh STPP	660	operating	2023		supercritical	unknown					NTPC [100%]	NTPC [100.0%]	25.4865	85.7452	exact	Barh		Patna	Bihar	https://www.gem.wiki/Barh_I_power_station	L100000102092	G100000100624	INE733E01010	1	1980		1	2063	2103	2143	0	0	0	4.65781e+06	4.19845e+06	4.19845e+06	4.19845e+06	4.19845e+06	4.19845e+06	4.19845e+06	4.19845e+06	4.19845e+06
coal	India	Asia	Southern Asia	Barh I power station	Unit 3		Barh STPP	660	construction	2024		supercritical	unknown					NTPC [100%]	NTPC [100.0%]	25.4865	85.7452	exact	Barh		Patna	Bihar	https://www.gem.wiki/Barh_I_power_station	L100000102092	G100000100625	INE733E01010	1	1980	1980	0	2064	2104	2144	0	0	0	0	4.19845e+06	4.19845e+06	4.19845e+06	4.19845e+06	4.19845e+06	4.19845e+06	4.19845e+06	4.19845e+06
coal	India	Asia	Southern Asia	Barh II power station	Unit 1			660	operating	2014		supercritical	unknown					NTPC [100%]	NTPC [100.0%]	25.4865	85.7452	exact	Barh		Patna	Bihar	https://www.gem.wiki/Barh_II_power_station	L100000102093	G100000100626	INE733E01010	1	1320		10	2054	2094	2134	3.93168e+06	3.88764e+06	4.31668e+06	4.65781e+06	4.19845e+06	4.19845e+06	4.19845e+06	4.19845e+06	4.19845e+06	4.19845e+06	4.19845e+06	4.19845e+06
coal	India	Asia	Southern Asia	Barh II power station	Unit 2			660	operating	2015		supercritical	unknown					NTPC [100%]	NTPC [100.0%]	25.4865	85.7452	exact	Barh		Patna	Bihar	https://www.gem.wiki/Barh_II_power_station	L100000102093	G100000100627	INE733E01010	1	1320	1320	9	2055	2095	2135	3.93168e+06	3.88764e+06	4.31668e+06	4.65781e+06	4.19845e+06	4.19845e+06	4.19845e+06	4.19845e+06	4.19845e+06	4.19845e+06	4.19845e+06	4.19845e+06
coal	India	Asia	Southern Asia	Bhilai Steel power station	Unit 2			30	operating	1982		subcritical	unknown					NTPC-SAIL Power [100%]	NTPC Ltd [50.0%]; Steel Authority of India Ltd [50.0%]	21.184	81.4237	exact	Bhilai		Durg	Chhattisgarh	https://www.gem.wiki/Bhilai_Steel_power_station	L100000102132	G100000100818	INE733E01010	0.5	560		42	2022	2062	2102	89356.3	88355.4	98106.5	105859	95419.4	95419.4	95419.4	95419.4	95419.4	95419.4	95419.4	95419.4
coal	India	Asia	Southern Asia	Bhilai Steel power station	Unit 3			30	operating	1983		subcritical	unknown					NTPC-SAIL Power [100%]	NTPC Ltd [50.0%]; Steel Authority of India Ltd [50.0%]	21.184	81.4237	exact	Bhilai		Durg	Chhattisgarh	https://www.gem.wiki/Bhilai_Steel_power_station	L100000102132	G100000100819	INE733E01010	0.5	560		41	2023	2063	2103	89356.3	88355.4	98106.5	105859	95419.4	95419.4	95419.4	95419.4	95419.4	95419.4	95419.4	95419.4
coal	India	Asia	Southern Asia	Bhilai Steel power station	Unit 4			250	operating	2009		subcritical	unknown					NTPC-SAIL Power [100%]	NTPC Ltd [50.0%]; Steel Authority of India Ltd [50.0%]	21.184	81.4237	exact	Bhilai		Durg	Chhattisgarh	https://www.gem.wiki/Bhilai_Steel_power_station	L100000102132	G100000100820	INE733E01010	0.5	560		15	2049	2089	2129	744636	736295	817554	882162	795162	795162	795162	795162	795162	795162	795162	795162
coal	India	Asia	Southern Asia	Bhilai Steel power station	Unit 5			250	operating	2009		subcritical	unknown					NTPC-SAIL Power [100%]	NTPC Ltd [50.0%]; Steel Authority of India Ltd [50.0%]	21.184	81.4237	exact	Bhilai		Durg	Chhattisgarh	https://www.gem.wiki/Bhilai_Steel_power_station	L100000102132	G100000100821	INE733E01010	0.5	560	560	15	2049	2089	2129	744636	736295	817554	882162	795162	795162	795162	795162	795162	795162	795162	795162
coal	India	Asia	Southern Asia	Bongaigaon power station	Unit 1			250	operating	2015		subcritical	bituminous					NTPC [100%]	NTPC [100.0%]	26.4444	90.3672	exact	Kumguri	Kokrajhar	Kokrajhar	Assam	https://www.gem.wiki/Bongaigaon_power_station	L100000102085	G100000101007	INE733E01010	1	750		9	2055	2095	2135	1.44054e+06	1.42441e+06	1.58161e+06	1.7066e+06	1.53829e+06	1.53829e+06	1.53829e+06	1.53829e+06	1.53829e+06	1.53829e+06	1.53829e+06	1.53829e+06
coal	India	Asia	Southern Asia	Bongaigaon power station	Unit 2			250	operating	2017		subcritical	bituminous					NTPC [100%]	NTPC [100.0%]	26.4444	90.3672	exact	Kumguri	Kokrajhar	Kokrajhar	Assam	https://www.gem.wiki/Bongaigaon_power_station	L100000102085	G100000101008	INE733E01010	1	750		7	2057	2097	2137	1.44054e+06	1.42441e+06	1.58161e+06	1.7066e+06	1.53829e+06	1.53829e+06	1.53829e+06	1.53829e+06	1.53829e+06	1.53829e+06	1.53829e+06	1.53829e+06
[truncated: 366 more rows]
[truncated: 28 more columns]
