# Supplementary material for: Assessing corporate transition plans using a production asset-based planning approach
Source: Research Square preprint supplement (doi:10.21203/rs.3.rs-5245457/v1), 2024-12-09
Supplement: Supplementary file 21 [file 5 Iberdrola.xlsx]

## Sheet: Iberdrola_all
Type	Country/area	Region	Subregion	Plant / Project name	Unit / Phase name	Plant / Project name (local)	Plant / Project name (other)	Capacity (MW)	Status	Start year	Retired year	Technology	Fuel	Country/area 1 (hydropower only)	Country/area 2 (hydropower only)	Country/area 1 Capacity (MW) (hydropower only)	Country/area 2 Capacity (MW) (hydropower only)	Owner	Parent	Latitude	Longitude	Location accuracy	City	Local area (taluk, county)	Major area (prefecture, district)	Subnational unit (state, province)	GEM.Wiki URL	GEM location ID	GEM unit/phase ID	CompISIN	Ownership	Plant capacity	Plant capacity	Age	Reinvestment year	Reinvestment year	Reinvestment year
coal	United Kingdom	Europe	Northern Europe	Cockenzie power station	Unit 1			326	retired	1967	2013	subcritical	bituminous					ScottishPower [100%]	Iberdrola SA [100.0%]	55.9683	-2.97248	exact	Cockenzie and Port Seton		East Lothian	Scotland	https://www.gem.wiki/Cockenzie_power_station	L100000103769	G100000101637	ES0144580Y14	1	2456		57	2007	2047	2087
coal	United Kingdom	Europe	Northern Europe	Cockenzie power station	Unit 2			326	retired	1967	2013	subcritical	bituminous					ScottishPower [100%]	Iberdrola SA [100.0%]	55.9683	-2.97248	exact	Cockenzie and Port Seton		East Lothian	Scotland	https://www.gem.wiki/Cockenzie_power_station	L100000103769	G100000101638	ES0144580Y14	1	2456		57	2007	2047	2087
coal	United Kingdom	Europe	Northern Europe	Cockenzie power station	Unit 3			326	retired	1967	2013	subcritical	bituminous					ScottishPower [100%]	Iberdrola SA [100.0%]	55.9683	-2.97248	exact	Cockenzie and Port Seton		East Lothian	Scotland	https://www.gem.wiki/Cockenzie_power_station	L100000103769	G100000101639	ES0144580Y14	1	2456		57	2007	2047	2087
coal	United Kingdom	Europe	Northern Europe	Cockenzie power station	Unit 4			326	retired	1969	2013	subcritical	bituminous					ScottishPower [100%]	Iberdrola SA [100.0%]	55.9683	-2.97248	exact	Cockenzie and Port Seton		East Lothian	Scotland	https://www.gem.wiki/Cockenzie_power_station	L100000103769	G100000101640	ES0144580Y14	1	2456		55	2009	2049	2089
coal	United Kingdom	Europe	Northern Europe	Cockenzie power station	New Plant			1152	cancelled	2011		supercritical	bituminous					ScottishPower [100%]	Iberdrola SA [100.0%]	55.9675	-2.96704	exact	East Lothian			Scotland	https://www.gem.wiki/Cockenzie_power_station	L100000103769	G100000101636	ES0144580Y14	1	2456	2456	13	2051	2091	2131
coal	United Kingdom	Europe	Northern Europe	Kincardine power station	Unit 1			120	retired	1958	2002	subcritical	unknown					ScottishPower [100%]	Iberdrola SA [100.0%]	56.0735	-3.7285	exact	Alloa		Clackmannanshire	Scotland	https://www.gem.wiki/Kincardine_power_station	L100000104707	G100000114620	ES0144580Y14	1	760		66	1998	2038	2078
coal	United Kingdom	Europe	Northern Europe	Kincardine power station	Unit 2			120	retired	1959	2002	subcritical	unknown					ScottishPower [100%]	Iberdrola SA [100.0%]	56.0735	-3.7285	exact	Alloa		Clackmannanshire	Scotland	https://www.gem.wiki/Kincardine_power_station	L100000104707	G100000114621	ES0144580Y14	1	760		65	1999	2039	2079
coal	United Kingdom	Europe	Northern Europe	Kincardine power station	Unit 3			120	retired	1960	2002	subcritical	unknown					ScottishPower [100%]	Iberdrola SA [100.0%]	56.0735	-3.7285	exact	Alloa		Clackmannanshire	Scotland	https://www.gem.wiki/Kincardine_power_station	L100000104707	G100000114622	ES0144580Y14	1	760		64	2000	2040	2080
coal	United Kingdom	Europe	Northern Europe	Kincardine power station	Unit 4			200	retired	1963	2002	subcritical	unknown					ScottishPower [100%]	Iberdrola SA [100.0%]	56.0735	-3.7285	exact	Alloa		Clackmannanshire	Scotland	https://www.gem.wiki/Kincardine_power_station	L100000104707	G100000114623	ES0144580Y14	1	760		61	2003	2043	2083
coal	United Kingdom	Europe	Northern Europe	Kincardine power station	Unit 5			200	retired	1964	2002	subcritical	unknown					ScottishPower [100%]	Iberdrola SA [100.0%]	56.0735	-3.7285	exact	Alloa		Clackmannanshire	Scotland	https://www.gem.wiki/Kincardine_power_station	L100000104707	G100000114624	ES0144580Y14	1	760	760	60	2004	2044	2084
coal	Spain	Europe	Southern Europe	Lada power station	Unit 2			50	retired	1951	2012	subcritical	bituminous					Iberdrola [100%]	Iberdrola [100.0%]	43.2964	-5.68254	exact	Langreo			Asturias	https://www.gem.wiki/Lada_power_station	L100000103501	G100000112612	ES0144580Y14	1	563		73	1991	2031	2071
coal	Spain	Europe	Southern Europe	Lada power station	Unit 3			155	retired	1967	2012	subcritical	bituminous					Iberdrola [100%]	Iberdrola [100.0%]	43.2964	-5.68254	exact	Langreo			Asturias	https://www.gem.wiki/Lada_power_station	L100000103501	G100000106087	ES0144580Y14	1	563		57	2007	2047	2087
coal	Spain	Europe	Southern Europe	Lada power station	Unit 4			358	retired	1981	2021	subcritical	bituminous					Iberdrola [100%]	Iberdrola [100.0%]	43.2964	-5.68254	exact	Langreo			Asturias	https://www.gem.wiki/Lada_power_station	L100000103501	G100000106088	ES0144580Y14	1	563	563	43	2021	2061	2101
coal	United Kingdom	Europe	Northern Europe	Longannet power station	Unit 1			614	retired	1970	2016	subcritical	bituminous					ScottishPower [100%]	Iberdrola SA [100.0%]	56.0485	-3.68255	exact	Kincardine		Fife	Scotland	https://www.gem.wiki/Longannet_power_station	L100000103770	G100000106402	ES0144580Y14	1	4856		54	2010	2050	2090
coal	United Kingdom	Europe	Northern Europe	Longannet power station	Unit 2			614	retired	1970	2016	subcritical	bituminous					ScottishPower [100%]	Iberdrola SA [100.0%]	56.0485	-3.68255	exact	Kincardine		Fife	Scotland	https://www.gem.wiki/Longannet_power_station	L100000103770	G100000106403	ES0144580Y14	1	4856		54	2010	2050	2090
coal	United Kingdom	Europe	Northern Europe	Longannet power station	Unit 3			614	retired	1970	2016	subcritical	bituminous					ScottishPower [100%]	Iberdrola SA [100.0%]	56.0485	-3.68255	exact	Kincardine		Fife	Scotland	https://www.gem.wiki/Longannet_power_station	L100000103770	G100000106404	ES0144580Y14	1	4856		54	2010	2050	2090
coal	United Kingdom	Europe	Northern Europe	Longannet power station	Unit 4			614	retired	1970	2016	subcritical	bituminous					ScottishPower [100%]	Iberdrola SA [100.0%]	56.0485	-3.68255	exact	Kincardine		Fife	Scotland	https://www.gem.wiki/Longannet_power_station	L100000103770	G100000106405	ES0144580Y14	1	4856		54	2010	2050	2090
coal	United Kingdom	Europe	Northern Europe	Longannet power station	CCS Demonstration Project			2400	cancelled	2011		subcritical/ccs	bituminous					Iberdrola [100%]	Iberdrola [100.0%]	56.0495	-3.68227	exact	Fife			Scotland	https://www.gem.wiki/Longannet_power_station	L100000103770	G100000106401	ES0144580Y14	1	4856	4856	13	2051	2091	2131
coal	United Kingdom	Europe	Northern Europe	Methil power station	Unit 1			30	retired	1965	2000	subcritical	unknown					ScottishPower [100%]	Iberdrola SA [100.0%]	56.1909	-2.99673	exact	Methil		Fife	Scotland	https://www.gem.wiki/Methil_power_station	L100000104709	G100000114626	ES0144580Y14	1	60		59	2005	2045	2085
coal	United Kingdom	Europe	Northern Europe	Methil power station	Unit 2			30	retired	1966	2000	subcritical	unknown					ScottishPower [100%]	Iberdrola SA [100.0%]	56.1909	-2.99673	exact	Methil		Fife	Scotland	https://www.gem.wiki/Methil_power_station	L100000104709	G100000114627	ES0144580Y14	1	60	60	58	2006	2046	2086
coal	Spain	Europe	Southern Europe	Pasajes power station	Unit 1			214	retired	1967	2012	subcritical	bituminous					Iberdrola [100%]	Iberdrola [100.0%]	43.3235	-1.91077	exact	Pasaia (Pasajes)	Donostialdea	Donostialdea	Gipuzkoa	https://www.gem.wiki/Pasajes_power_station	L100000103512	G100000107853	ES0144580Y14	1	214	214	57	2007	2047	2087
coal	Guatemala	Americas	Latin America and the Caribbean	Puerto Barrios Iberdrola power station	--	Planta Termoeléctrica de Puerto Barrios		300	cancelled			subcritical	unknown					Iberdrola Renovables [100%]	Iberdrola SA [100.0%]	15.7167	-88.5833	approximate	Puerto Barrios			Izabel	https://www.gem.wiki/Puerto_Barrios_Iberdrola_power_station	L100000102014	G100000108203	ES0144580Y14	1	300	300	-99	40	80	120
coal	Spain	Europe	Southern Europe	Velilla del Río Carrión power station	Unit 1			154.9	retired	1964	2020	subcritical	anthracite					Iberdrola [100%]	Iberdrola [100.0%]	42.8185	-4.8547	exact	Velilla del Río Carrión	Montaña Palentina	Palencia	Castilla y León	https://www.gem.wiki/Velilla_del_Río_Carrión_power_station	L100000103509	G100000110572	ES0144580Y14	1	515.6		60	2004	2044	2084
coal	Spain	Europe	Southern Europe	Velilla del Río Carrión power station	Unit 2			360.7	retired	1984	2020	subcritical	bituminous					Iberdrola [100%]	Iberdrola [100.0%]	42.8185	-4.8547	exact	Velilla del Río Carrión	Montaña Palentina	Palencia	Castilla y León	https://www.gem.wiki/Velilla_del_Río_Carrión_power_station	L100000103509	G100000110573	ES0144580Y14	1	515.6	515.6	40	2024	2064	2104
hydropower	Portugal	Europe	Southern Europe	Alto Tâmega hydroelectric plant				160	construction	2024		conventional storage				TRUE	FALSE	Iberdrola		41.5739	-7.7311	exact		Vila Real			https://gem.wiki/Alto_Tâmega_hydroelectric_plant	L603189	G603224	ES0144580Y14	1	160	160	0	2064	2104	2144
hydropower	Spain	Europe	Southern Europe	Barazar hydroelectric plant			Barazar 1	84	operating	1957		conventional storage				TRUE	FALSE	Iberdrola		43.0796	-2.7338	exact				Autonomous Community of the Basque Country	https://gem.wiki/Barazar_hydroelectric_plant	L603346	G603381	ES0144580Y14	1	84	84	67	1997	2037	2077
hydropower	Spain	Europe	Southern Europe	Cofrentes hydroelectric plant			Salto de Cofrentes	122	operating	1951		conventional storage				TRUE	FALSE	Iberdrola		39.2468	-1.0939	exact			Valencia	Valencian Community	https://gem.wiki/Cofrentes_hydroelectric_plant	L603357	G603392	ES0144580Y14	1	122	122	73	1991	2031	2071
hydropower	Spain	Europe	Southern Europe	Conso hydroelectric plant			Las Portas	270	operating	1975		unknown				TRUE	FALSE	Iberdrola		42.1142	-7.209	exact		Viana		Galicia	https://gem.wiki/Conso_hydroelectric_plant	L603358	G603393	ES0144580Y14	1	270	270	49	2015	2055	2095
hydropower	Spain	Europe	Southern Europe	Cortes II hydroelectric plant				246	operating	1989		conventional storage				TRUE	FALSE	Iberdrola		39.2636	-0.919	exact			Valencia	Valencian Community	https://gem.wiki/Cortes_II_hydroelectric_plant	L603360	G603395	ES0144580Y14	1	246	246	35	2029	2069	2109
hydropower	Spain	Europe	Southern Europe	Cortes La Muela II hydroelectric plant			La Muela II	882	operating	2013		pumped storage				TRUE	FALSE	Iberdrola		39.2444	-0.9314	exact			Valencia	Valencian Community	https://gem.wiki/Cortes_La_Muela_II_hydroelectric_plant	L603361	G603396	ES0144580Y14	1	882	882	11	2053	2093	2133
hydropower	Portugal	Europe	Southern Europe	Daivões hydroelectric plant				118	operating	2022		conventional storage				TRUE	FALSE	Iberdrola		41.5239	-7.8651	exact		Braga			https://gem.wiki/Daivões_hydroelectric_plant	L603198	G604331	ES0144580Y14	1	118	118	2	2062	2102	2142
hydropower	Portugal	Europe	Southern Europe	Gouvães hydroelectric plant				220	operating	2022		pumped storage				TRUE	FALSE	Iberdrola		41.4938	-7.727	exact		Vila Real			https://gem.wiki/Gouvães_hydroelectric_plant	L603201	G603236	ES0144580Y14	1	220	220	2	2062	2102	2142
hydropower	Spain	Europe	Southern Europe	José María Oriol hydroelectric plant			Alcántara II, Jose M Oriol Grupo 4	957	operating	1969		conventional storage				TRUE	FALSE	Iberdrola		39.7291	-6.8854	exact		Tajo-Salor	Cáceres	Extremadura	https://gem.wiki/José_María_Oriol_hydroelectric_plant	L603369	G603404	ES0144580Y14	1	957	957	55	2009	2049	2089
hydropower	Spain	Europe	Southern Europe	La Muela I hydroelectric plant			La Muela	635	operating	1989		pumped storage				TRUE	FALSE	Iberdrola		39.2628	-0.9192	exact			Valencia	Valencian Community	https://gem.wiki/La_Muela_I_hydroelectric_plant	L603370	G603405	ES0144580Y14	1	635	635	35	2029	2069	2109
hydropower	Spain	Europe	Southern Europe	Puente Bibey hydroelectric plant			Puente Bibey 4	315	operating	1960		unknown				TRUE	FALSE	Iberdrola		42.3342	-7.2152	exact		Terra de Trives		Galicia	https://gem.wiki/Puente_Bibey_hydroelectric_plant	L603380	G603415	ES0144580Y14	1	315	315	64	2000	2040	2080
hydropower	Spain	Europe	Southern Europe	Ricobayo I hydroelectric plant			Ricobayo (Esla)	175	operating	1934		conventional storage				TRUE	FALSE	Iberdrola		41.5284	-5.9867	exact			Zamora	Castile and León	https://gem.wiki/Ricobayo_I_hydroelectric_plant	L603382	G603417	ES0144580Y14	1	175	175	90	1974	2014	2054
hydropower	Spain	Europe	Southern Europe	Ricobayo II hydroelectric plant				154	operating	1998		conventional storage				TRUE	FALSE	Iberdrola		41.5284	-5.9867	exact			Zamora	Castile and León	https://gem.wiki/Ricobayo_II_hydroelectric_plant	L603383	G603418	ES0144580Y14	1	154	154	26	2038	2078	2118
hydropower	Spain	Europe	Southern Europe	San Esteban hydroelectric plant			Santo Estavo I	263	operating	1957		conventional storage				TRUE	FALSE	Iberdrola		42.4143	-7.6534	exact	Nogueira de Ramuín	Ourense		Galicia	https://gem.wiki/San_Esteban_hydroelectric_plant	L603385	G603420	ES0144580Y14	1	263	263	67	1997	2037	2077
hydropower	Spain	Europe	Southern Europe	San Esteban II hydroelectric plant			Santo Estavo II, San Esteban II Grupo 1	188	operating	2012		conventional storage				TRUE	FALSE	Iberdrola		42.4143	-7.6534	exact	Nogueira de Ramuín	Ourense		Galicia	https://gem.wiki/San_Esteban_II_hydroelectric_plant	L603386	G603421	ES0144580Y14	1	188	188	12	2052	2092	2132
hydropower	Spain	Europe	Southern Europe	Santa Cristina Lugo hydroelectric plant			Santa Cristina	728	cancelled			pumped storage				TRUE	FALSE	Iberdrola		42.4143	-7.6478	exact	Nogueira de Ramuín	Ourense		Galicia	https://gem.wiki/Santa_Cristina_Lugo_hydroelectric_plant	L603387	G604781	ES0144580Y14	1	728	728	-99	40	80	120
hydropower	Spain	Europe	Southern Europe	Saucelle hydroelectric plant				251	operating	1956		conventional storage				TRUE	FALSE	Iberdrola		41.0449	-6.8071	exact			Salamanca	Castile and León	https://gem.wiki/Saucelle_hydroelectric_plant	L604105	G604144	ES0144580Y14	1	251	251	68	1996	2036	2076
hydropower	Spain	Europe	Southern Europe	Saucelle II hydroelectric plant				269	operating	1985		conventional storage				TRUE	FALSE	Iberdrola		41.0449	-6.8071	exact			Salamanca	Castile and León	https://gem.wiki/Saucelle_II_hydroelectric_plant	L604106	G604145	ES0144580Y14	1	269	269	39	2025	2065	2105
hydropower	Spain	Europe	Southern Europe	Soutelo hydroelectric plant			Soutelo 2	215	operating			pumped storage				TRUE	FALSE	Iberdrola		42.1543	-7.1887	exact		Viana		Galicia	https://gem.wiki/Soutelo_hydroelectric_plant	L603388	G603423	ES0144580Y14	1	215	215	-99	40	80	120
hydropower	Spain	Europe	Southern Europe	Torrejón hydroelectric plant			Torrejon 1	132	operating			pumped storage				TRUE	FALSE	Iberdrola		39.8356	-5.989	exact		Campo Arañuelo	Cáceres	Extremadura	https://gem.wiki/Torrejón_hydroelectric_plant	L603394	G603429	ES0144580Y14	1	132	132	-99	40	80	120
hydropower	Spain	Europe	Southern Europe	Valdecañas hydroelectric plant			Valdecanas 3	249	operating	1964		pumped storage				TRUE	FALSE	Iberdrola		39.7785	-5.612	exact		Campo Arañuelo	Cáceres	Extremadura	https://gem.wiki/Valdecañas_hydroelectric_plant	L603395	G603430	ES0144580Y14	1	249	249	60	2004	2044	2084
hydropower	Spain	Europe	Southern Europe	Villacampo hydroelectric plant				218	operating	1949		conventional storage				TRUE	FALSE	Iberdrola		41.4911	-6.0853	exact			Zamora	Castile and León	https://gem.wiki/Villacampo_hydroelectric_plant	L603398	G603433	ES0144580Y14	1	218	218	75	1989	2029	2069
hydropower	Spain	Europe	Southern Europe	Villarino hydroelectric plant			Villarino 4	810	operating	1970		pumped storage				TRUE	FALSE	Iberdrola		41.255	-6.4874	exact			Salamanca	Castile and León	https://gem.wiki/Villarino_hydroelectric_plant	L603399	G603434	ES0144580Y14	1	810	810	54	2010	2050	2090
nuclear	Spain	Europe	Southern Europe	Almaraz nuclear power plant	1			1049	operating	1983		pressurized water reactor						Iberdrola; Endesa; Gas Natural		39.807	-5.6986	exact		Campo Arañuelo	Cáceres	Extremadura	https://gem.wiki/Almaraz_nuclear_power_plant	L500113	G500239	ES0144580Y14	0.333333	2093		41	2023	2063	2103
nuclear	Spain	Europe	Southern Europe	Almaraz nuclear power plant	2			1044	operating	1984		pressurized water reactor						Iberdrola; Endesa; Gas Natural		39.807	-5.6986	exact		Campo Arañuelo	Cáceres	Extremadura	https://gem.wiki/Almaraz_nuclear_power_plant	L500113	G500240	ES0144580Y14	0.333333	2093	2093	40	2024	2064	2104
nuclear	Spain	Europe	Southern Europe	Ascó nuclear power plant	2			1027	operating	1986		pressurized water reactor						Endesa; Iberdrola		41.1993	0.5694	exact		Ribera d'Ebre	Tarragona	Catalonia	https://gem.wiki/Ascó_nuclear_power_plant	L500115	G500243	ES0144580Y14	0.5	1027	1027	38	2026	2066	2106
nuclear	Spain	Europe	Southern Europe	Cofrentes nuclear power plant				1102	operating	1985		boiling water reactor						Iberdrola SA		39.2134	-1.0509	exact			Valencia	Valencian Community	https://gem.wiki/Cofrentes_nuclear_power_plant	L500081	G500149	ES0144580Y14	1	1102	1102	39	2025	2065	2105
nuclear	Spain	Europe	Southern Europe	Lemóniz nuclear power plant	1		Lemoiz	930	cancelled			pressurized water reactor						Iberdrola SA		43.4333	-2.8726	exact		Andraka		Autonomous Community of the Basque Country	https://gem.wiki/Lemóniz_nuclear_power_plant	L500442	G501280	ES0144580Y14	1	1860		-99	40	80	120
nuclear	Spain	Europe	Southern Europe	Lemóniz nuclear power plant	2		Lemoiz	930	cancelled			pressurized water reactor						Iberdrola SA		43.4333	-2.8726	exact		Andraka		Autonomous Community of the Basque Country	https://gem.wiki/Lemóniz_nuclear_power_plant	L500442	G501281	ES0144580Y14	1	1860	1860	-99	40	80	120
nuclear	Spain	Europe	Southern Europe	Trillo nuclear power plant	1			1066	operating	1988		pressurized water reactor						Iberdrola; Gas Natural; Hidroeléctrica del Cantábrico; Nuclenor		40.7016	-2.6227	exact			Guadalajara	Castile-La Mancha	https://gem.wiki/Trillo_nuclear_power_plant	L500105	G500202	ES0144580Y14	0.25	1066	1066	36	2028	2068	2108
nuclear	Spain	Europe	Southern Europe	Vandellos nuclear power plant	2			1087	operating	1988		pressurized water reactor						Endesa; Iberdrola		40.9511	0.8662	exact	Vandellòs i l'Hospitalet de l'Infant	Baix Camp	Tarragona	Catalonia	https://gem.wiki/Vandellos_nuclear_power_plant	L500114	G500241	ES0144580Y14	0.5	1087	1087	36	2028	2068	2108
oil/gas	Spain	Europe	Southern Europe	Aceca 3 power station	1			386	operating	2005		CC	NG					Iberdrola Generacion SA [100.0%]	Iberdrola SA [100.0%]	39.9442	-3.8558	exact	Villaseca de la Sagra			Toledo	https://www.gem.wiki/Aceca_3_power_station	L100000400644	G100000400644	ES0144580Y14	1	386	386	19	2045	2085	2125
oil/gas	Mexico	Americas	Latin America and the Caribbean	Altamira Dynasol cogeneration power station	1	Planta de Cogeneración Altamira Dynasol		57	operating	2017		CC	NG					Iberdrola Generación México [100%]; Iberdrola Cogeneración Altamira SA de CV	Iberdrola SA [100.0%]; Iberdrola Cogeneración Altamira SA de CV	22.4474	-97.9705	exact	Altamira			Tamaulipas	https://www.gem.wiki/Altamira_Dynasol_cogeneration_power_station	L100000406694	G100000406952	ES0144580Y14	1	57	57	7	2057	2097	2137
oil/gas	Spain	Europe	Southern Europe	Arcos de la Frontera power station	CC-1			389.2	operating	2005		CC	NG					Iberdrola Generacion SA [100.0%]	Iberdrola SA [100.0%]	36.6721	-5.8164	exact	Arcos de La Frontera			Cadiz	https://www.gem.wiki/Arcos_de_la_Frontera_power_station	L100000400649	G100000400649	ES0144580Y14	1	1585.4		19	2045	2085	2125
oil/gas	Spain	Europe	Southern Europe	Arcos de la Frontera power station	CC-2			373.2	operating	2005		CC	NG					Iberdrola Generacion SA [100.0%]	Iberdrola SA [100.0%]	36.6721	-5.8164	exact	Arcos de La Frontera			Cadiz	https://www.gem.wiki/Arcos_de_la_Frontera_power_station	L100000400649	G100000400650	ES0144580Y14	1	1585.4		19	2045	2085	2125
oil/gas	Spain	Europe	Southern Europe	Arcos de la Frontera power station	CC-3			823	operating	2005		CC	NG					Iberdrola Generacion SA [100.0%]	Iberdrola SA [100.0%]	36.6721	-5.8164	exact	Arcos de La Frontera			Cadiz	https://www.gem.wiki/Arcos_de_la_Frontera_power_station	L100000400649	G100000400651	ES0144580Y14	1	1585.4	1585.4	19	2045	2085	2125
oil/gas	Mexico	Americas	Latin America and the Caribbean	Bajío cogeneration power station	1	Planta de Cogeneración Bajío	Kimberly-Clark San Juan/Cogeneración Bajío	52	operating	2018		CC	NG					Iberdrola Generación México [100%]	Iberdrola SA [100.0%]	20.381	-99.9777	exact	San Juan del Río			Querétaro	https://www.gem.wiki/Bajío_cogeneration_power_station	L100000406190	G100000406531	ES0144580Y14	1	52	52	6	2058	2098	2138
oil/gas	Spain	Europe	Southern Europe	Castejón power station	2	Central térmica Castejón; CICLO COMBINADO DE CASTEJON		378.9	operating	2003		CC	NG					Iberdrola SA [100.0%]	Iberdrola SA [100.0%]	42.1718	-1.6773	exact	Castejon			Navarra	https://www.gem.wiki/Castejón_power_station	L100000400666	G100000400667	ES0144580Y14	1	378.9	378.9	21	2043	2083	2123
oil/gas	Spain	Europe	Southern Europe	Castellón power station	3			782	operating	2002		CC	NG					Iberdrola Generacion SA [100.0%]	Iberdrola SA [100.0%]	39.9592	-0.001	exact	Castelló de la Plana			Castellon	https://www.gem.wiki/Castellón_power_station	L100000400670	G100000400670	ES0144580Y14	1	1640		22	2042	2082	2122
oil/gas	Spain	Europe	Southern Europe	Castellón power station	4			858	operating	2008		CC	NG					Iberdrola Generacion SA [100.0%]	Iberdrola SA [100.0%]	39.9592	-0.001	exact	Castelló de la Plana			Castellon	https://www.gem.wiki/Castellón_power_station	L100000400670	G100000400671	ES0144580Y14	1	1640	1640	16	2048	2088	2128
oil/gas	Mexico	Americas	Latin America and the Caribbean	Dulces Nombres II power station	1	Planta CC Dulces Nombres II	Monterrey V	300	operating	2016		CC	NG					Iberdrola Generación México [100%]	Iberdrola SA [100.0%]	25.7175	-100.096	exact	Dulces Nombres	Pesquería		Nuevo León	https://gem.wiki/Dulces_Nombres_II_power_station	L100000406205	G100000406518	ES0144580Y14	1	300	300	8	2056	2096	2136
oil/gas	Mexico	Americas	Latin America and the Caribbean	El Carmen Nuevo Leon power station	1	Planta CC El Carmen	El Carmen	866	operating	2019		CC	NG					Iberdrola México SA de CV [100%]	Iberdrola SA [100.0%]	25.87	-100.359	approximate	El Carmen			Nuevo León	https://gem.wiki/El_Carmen_Nuevo_Leon_power_station	L100000406652	G100000401028	ES0144580Y14	1	866	866	5	2059	2099	2139
oil/gas	Spain	Europe	Southern Europe	Enercrisa power station	1			21	operating	2009		CC	NG					Enercrisa SA [100.0%]	Grupo Industrial Crimidesa SL [50.0%]; Iberdrola SA [50.0%]	42.4838	-3.15084	exact	Cerezo de Rio Tiron			Burgos	https://www.gem.wiki/Enercrisa_power_station	L100000400679	G100000400679	ES0144580Y14	0.5	21	21	15	2049	2089	2129
oil/gas	Spain	Europe	Southern Europe	Escombreras Iberdrola power station	6			816	operating	2006		CC	NG					Iberdrola SA [100.0%]	Iberdrola SA [100.0%]	37.5647	-0.95132	exact	Cartagena			Murcia	https://www.gem.wiki/Escombreras_Iberdrola_power_station	L100000400682	G100000400682	ES0144580Y14	1	816	816	18	2046	2086	2126
oil/gas	Spain	Europe	Southern Europe	Fuenlabrada Mill power station	1		International Paper Madrid Mill	43	operating	2001		CC	NG					Iberdrola SA [50.0%]; International Paper Co [50.0%]	Iberdrola SA [50.0%]	40.269	-3.77064	exact	Fuenlabrada			Madrid	https://www.gem.wiki/Fuenlabrada_Mill_power_station	L100000400684	G100000400684	ES0144580Y14	0.5	43	43	23	2041	2081	2121
oil/gas	Mexico	Americas	Latin America and the Caribbean	Merida Kanasín CC power station	1	Central CC Mérida Kanasín		573	cancelled			CC	NG					Iberdrola México SA de CV [100%]	Iberdrola SA [100.0%]	20.9222	-89.5404	approximate	Mérida			Yucatán	https://gem.wiki/Merida_Kanas%C3%ADn_CC_power_station	L100000407733	G100000410196	ES0144580Y14	1	573	573	-99	40	80	120
oil/gas	Spain	Europe	Southern Europe	Michelin Aranda power station	1			32	operating	2003		CC	NG					Energyworks Aranda Sl [100.0%]	Iberdrola SA [100.0%]	41.6629	-3.71	exact	Aranda de Duero			Burgos	https://www.gem.wiki/Michelin_Aranda_power_station	L100000400690	G100000400690	ES0144580Y14	1	32	32	21	2043	2083	2123
oil/gas	Spain	Europe	Southern Europe	Michelin Valladolid power station	1			46	operating	2000		CC	NG					Energyworks Vit-vall Sl [100.0%]	Iberdrola SA [100.0%]	41.6753	-4.71607	exact	Valladolid			Valladolid	https://www.gem.wiki/Michelin_Valladolid_power_station	L100000400691	G100000400691	ES0144580Y14	1	46	46	24	2040	2080	2120
oil/gas	Spain	Europe	Southern Europe	Neumaticos Michelin Vitoria power station	1			47	operating	2000		CC	NG					Energyworks Vit-vall Sl [100.0%]	Iberdrola SA [100.0%]	42.8667	-2.67174	exact	Vitoria-Gasteiz			Araba	https://www.gem.wiki/Neumaticos_Michelin_Vitoria_power_station	L100000400694	G100000400694	ES0144580Y14	1	47	47	24	2040	2080	2120
oil/gas	Spain	Europe	Southern Europe	Peninsular de Cogeneracion Mill power station	1			34	operating	2010		CC	NG					Peninsular de Cogeneracion SA [100.0%]	Iberdrola SA [50.0%]; International Paper Co [50.0%]	40.2709	-3.76811	exact	Madrid			Madrid	https://www.gem.wiki/Peninsular_de_Cogeneracion_Mill_power_station	L100000407786	G100000410351	ES0144580Y14	0.5	34	34	14	2050	2090	2130
oil/gas	Mexico	Americas	Latin America and the Caribbean	Ramos cogeneration power station	1	Planta de Cogeneración Ramos	Kimberly-Clark Ramos	52	operating	2016		CC	NG					Iberdrola Generación México [100%]	Iberdrola SA [100.0%]	25.5955	-100.888	exact	Ramos Arizpe			Coahuila	https://www.gem.wiki/Ramos_cogeneration_power_station	L100000406244	G100000406525	ES0144580Y14	1	52	52	8	2056	2096	2136
oil/gas	Spain	Europe	Southern Europe	Santurce power station	4			396	operating	2005		CC	NG					Iberdrola SA [100.0%]	Iberdrola SA [100.0%]	43.34	-3.0539	exact	Santurtzi			Biscay	https://www.gem.wiki/Santurce_power_station	L100000400713	G100000400713	ES0144580Y14	1	396	396	19	2045	2085	2125
oil/gas	Australia	Oceania	Australia and New Zealand	Smithfield Energy Facility power station	4			160	operating	1997	2044	CC	NG					Smithfield Power Generation Pty Ltd [100.0%]	Iberdrola SA [100.0%]	-33.85	150.947	exact	Smithfield			New South Wales	https://www.gem.wiki/Smithfield_Energy_Facility_power_station	L100000405132	G100000401541	ES0144580Y14	1	160	160	27	2037	2077	2117
oil/gas	Spain	Europe	Southern Europe	Tarragona power station	1			417	operating	2004		CC	NG					Tarragona Power SL [100.0%]	Iberdrola SA [100.0%]	41.1102	1.18055	exact	La Canonja			Tarragona	https://www.gem.wiki/Tarragona_power_station	L100000400718	G100000400718	ES0144580Y14	1	417	417	20	2044	2084	2124
solar	Spain	Europe	Southern Europe	Alcarria solar farm				40	construction			PV						Iberdrola SA		39.6196	-2.7904	approximate			Cuenca	Castile-La Mancha	https://gem.wiki/Alcarria_solar_farm	L824304	G827413	ES0144580Y14	1	40	40	-99	40	80	120
solar	Portugal	Europe	Southern Europe	Alcochete solar farm	1			32.9	pre-construction			PV						Iberdrola SA		38.7056	-8.8517	approximate		Setúbal			https://gem.wiki/Alcochete_solar_farm	L824084	G827155	ES0144580Y14	1	45.6		-99	40	80	120
solar	Portugal	Europe	Southern Europe	Alcochete solar farm	2			12.7	pre-construction			PV						Iberdrola SA		38.7056	-8.8517	approximate		Setúbal			https://gem.wiki/Alcochete_solar_farm	L824084	G827156	ES0144580Y14	1	45.6	45.6	-99	40	80	120
solar	Portugal	Europe	Southern Europe	Algeruz solar farm	2			27.4	operating	2022		PV						Iberdrola SA		38.5792	-8.8435	approximate		Setúbal			https://gem.wiki/Algeruz_solar_farm	L824087	G827160	ES0144580Y14	1	27.4	27.4	2	2062	2102	2142
solar	Spain	Europe	Southern Europe	Almaraz solar farm	1			42.6	operating	2022		PV						Iberdrola SA		39.7867	-5.7003	approximate		Campo Arañuelo	Cáceres	Extremadura	https://gem.wiki/Almaraz_solar_farm	L824320	G827431	ES0144580Y14	1	85.2		2	2062	2102	2142
solar	Spain	Europe	Southern Europe	Almaraz solar farm	2			42.6	operating	2022		PV						Iberdrola SA		39.7867	-5.7003	approximate		Campo Arañuelo	Cáceres	Extremadura	https://gem.wiki/Almaraz_solar_farm	L824320	G827432	ES0144580Y14	1	85.2	85.2	2	2062	2102	2142
solar	Spain	Europe	Southern Europe	Andévalo solar farm	1			50	operating	2020		PV						Iberdrola SA		37.6102	-7.2453	approximate	Puebla de Guzmán	Andévalo		Huelva	https://gem.wiki/Andévalo_solar_farm	L805876	G806761	ES0144580Y14	1	50	50	4	2060	2100	2140
solar	Spain	Europe	Southern Europe	Arenales (Iberdrola) solar farm	1			150	operating	2021		PV						Iberdrola SA		39.4578	-6.4421	approximate	Caceres			Caceres	https://gem.wiki/Arenales_(Iberdrola)_solar_farm	L805877	G806762	ES0144580Y14	1	150	150	3	2061	2101	2141
solar	Australia	Oceania	Australia and New Zealand	Avonlie Solar				245	construction	2023		PV						Iberdrola SA		-34.9183	146.609	exact				New South Wales	https://gem.wiki/Avonlie_Solar	L805593	G806435	ES0144580Y14	1	245	245	1	2063	2103	2143
solar	Spain	Europe	Southern Europe	Ayamonte Hybrid solar farm				57.6	announced			PV						Iberdrola SA		37.2148	-7.4001	approximate		Ayamonte			https://gem.wiki/Ayamonte_Hybrid_solar_farm	L824369	G827486	ES0144580Y14	1	57.6	57.6	-99	40	80	120
solar	Spain	Europe	Southern Europe	Azaila solar farm	1			50	operating	2021		PV						Iberdrola SA		41.2641	-0.452	exact	Azaila			Teruel	https://gem.wiki/Azaila_solar_farm	L805863	G806745	ES0144580Y14	1	50		3	2061	2101	2141
solar	Spain	Europe	Southern Europe	Barcience solar farm	1			50	operating	2021		PV						Iberdrola SA		39.938	-4.0315	approximate	Bargas			Toledo	https://gem.wiki/Barcience_solar_farm	L805878	G806763	ES0144580Y14	1	50	50	3	2061	2101	2141
solar	Spain	Europe	Southern Europe	Biar solar farm				45.5	pre-construction			PV						Iberdrola SA		38.3516	-0.49	approximate	Alicante		Alacant / Alicante	Valencian Community	https://gem.wiki/Biar_solar_farm	L824385	G827509	ES0144580Y14	1	45.5	45.5	-99	40	80	120
solar	Australia	Oceania	Australia and New Zealand	Broadsound solar farm				385	pre-construction			PV						Iberdrola SA		-22.8114	149.389	exact				Queensland	https://gem.wiki/Broadsound_solar_farm	L805588	G806430	ES0144580Y14	1	385	385	-99	40	80	120
solar	Spain	Europe	Southern Europe	Campo Arañuelo solar farm	1		Arañuelo I	50	operating	2021		PV						Iberdrola SA		39.8161	-5.6831	approximate	Almaraz			Cáceres	https://gem.wiki/Campo_Arañuelo_solar_farm	L805864	G806746	ES0144580Y14	1	140		3	2061	2101	2141
solar	Spain	Europe	Southern Europe	Campo Arañuelo solar farm	2		Arañuelo II	50	operating	2021		PV						Iberdrola SA		39.8161	-5.6831	approximate	Almaraz			Cáceres	https://gem.wiki/Campo_Arañuelo_solar_farm	L805864	G806747	ES0144580Y14	1	140		3	2061	2101	2141
solar	Spain	Europe	Southern Europe	Campo Arañuelo solar farm	3		Arañuelo III	40	operating	2021		PV						Iberdrola SA		39.7865	-5.7008	exact	Romangordo			Cáceres	https://gem.wiki/Campo_Arañuelo_solar_farm	L805864	G806749	ES0144580Y14	1	140	140	3	2061	2101	2141
solar	Portugal	Europe	Southern Europe	Carregado solar farm				64	construction			PV						Iberdrola SA		39.0237	-8.9646	approximate		Lisbon			https://gem.wiki/Carregado_solar_farm	L824113	G827190	ES0144580Y14	1	64	64	-99	40	80	120
solar	Spain	Europe	Southern Europe	Cartagena solar farm	1		SABIC Cartagena	100	announced			PV						Iberdrola SA		37.7063	-1.1009	exact	Cartagena	Campo de Cartagena y Mar Menor	Region of Murcia	Region of Murcia	https://gem.wiki/Cartagena_solar_farm	L805874	G806759	ES0144580Y14	1	100	100	-99	40	80	120
solar	Spain	Europe	Southern Europe	Ceclavín solar farm	1			328	operating	2021		PV						Iberdrola SA		39.8201	-6.7798	approximate	Ceclavín			Cáceres	https://gem.wiki/Ceclavín_solar_farm	L805865	G806748	ES0144580Y14	1	328	328	3	2061	2101	2141
solar	Spain	Europe	Southern Europe	Cedillo solar farm				374.9	pre-construction			PV						Iberdrola SA		39.6509	-7.4983	approximate		Valencia de Alcántara	Cáceres	Extremadura	https://gem.wiki/Cedillo_solar_farm	L824445	G827588	ES0144580Y14	1	374.9	374.9	-99	40	80	120
solar	Spain	Europe	Southern Europe	Cespedera solar farm				27	pre-construction			PV						Iberdrola SA		36.52	-6.2808	approximate	Cadiz				https://gem.wiki/Cespedera_solar_farm	L824454	G827599	ES0144580Y14	1	27	27	-99	40	80	120
solar	Spain	Europe	Southern Europe	Ciudad Rodrigo solar farm	1		Ciudad Rodrigo PV	318	construction			PV						Iberdrola SA		40.603	-6.5214	approximate	Ciudad Rodrigo			Salamanca	https://gem.wiki/Ciudad_Rodrigo_solar_farm	L805866	G806750	ES0144580Y14	1	318	318	-99	40	80	120
solar	Portugal	Europe	Southern Europe	Conde solar farm				14	pre-construction			PV						Iberdrola SA		39.678	-8.1983	approximate		Castelo Branco			https://gem.wiki/Conde_solar_farm	L824126	G827204	ES0144580Y14	1	14	14	-99	40	80	120
solar	Mexico	Americas	Latin America and the Caribbean	Cuyoaco solar farm		Planta Solar Cuyoaco		220.8	operating	2020		PV						Iberdrola México		19.5848	-97.5922	exact		Cuyoaco		Puebla	https://gem.wiki/Cuyoaco_solar_farm	L807277	G808631	ES0144580Y14	1	220.8	220.8	4	2060	2100	2140
solar	Spain	Europe	Southern Europe	El Almendro solar farm				33.3	announced			PV						Iberdrola SA		37.506	-7.2717	approximate		El Andévalo	Huelva	Andalusia	https://gem.wiki/El_Almendro_solar_farm	L824499	G827655	ES0144580Y14	1	33.3	33.3	-99	40	80	120
solar	Spain	Europe	Southern Europe	El Romeral solar farm	1			42	operating	2022		PV						Iberdrola SA		39.5687	-2.0884	approximate	Alarcón			Cuenca	https://gem.wiki/El_Romeral_solar_farm	L805871	G806755	ES0144580Y14	1	42	42	2	2062	2102	2142
solar	Portugal	Europe	Southern Europe	Estoi solar farm				83	pre-construction	2024		PV						Iberdrola SA		37.0948	-7.8896	approximate	Faro	Faro			https://gem.wiki/Estoi_solar_farm	L824136	G827214	ES0144580Y14	1	83	83	0	2064	2104	2144
solar	Portugal	Europe	Southern Europe	Fernando Pessoa solar farm				1200	pre-construction	2025		PV						Iberdrola SA; Prosolia INC		37.9851	-8.7751	approximate	Santiago do Cacém	Sines			https://gem.wiki/Fernando_Pessoa_solar_farm	L824141	G827219	ES0144580Y14	0.5	1200	1200	-1	2065	2105	2145
solar	Spain	Europe	Southern Europe	Francisco Pizarro solar farm	1			590	operating	2022		PV						Iberdrola SA		39.5731	-5.7051	approximate	Torrecillas de la Tiesa			Cáceres	https://gem.wiki/Francisco_Pizarro_solar_farm	L805867	G806751	ES0144580Y14	1	590	590	2	2062	2102	2142
solar	Spain	Europe	Southern Europe	Fuendetodos solar farm				124.9	pre-construction			PV						Iberdrola SA		41.3454	-0.9952	approximate		Campo de Belchite		Aragon	https://gem.wiki/Fuendetodos_solar_farm	L824549	G827719	ES0144580Y14	1	124.9	124.9	-99	40	80	120
solar	Spain	Europe	Southern Europe	Fuentes solar farm				50	construction			PV						Iberdrola SA		39.9442	-2.0069	approximate	Fuentes				https://gem.wiki/Fuentes_solar_farm	L824551	G827721	ES0144580Y14	1	50		-99	40	80	120
solar	Spain	Europe	Southern Europe	FV Alhorines solar farm	1			50	pre-construction			PV						Iberdrola SA		38.7624	-0.9537	approximate	La Encina	Vilena		Alicante	https://gem.wiki/FV_Alhorines_solar_farm	L805868	G806752	ES0144580Y14	1	50	50	-99	40	80	120
solar	Spain	Europe	Southern Europe	FV Cofrentes solar farm	1		FV Cofrentes 1	200	pre-construction			PV						Iberdrola SA		39.2238	-1.0591	approximate	Cofrentes			Valencia	https://gem.wiki/FV_Cofrentes_solar_farm	L805870	G806754	ES0144580Y14	1	200	200	-99	40	80	120
solar	Mexico	Americas	Latin America and the Caribbean	Galeana PV solar farm		Parque Solar Fotovoltaica Galeana		50	cancelled			PV						Iberdrola SA		24.8205	-100.075	approximate			Galeana	Nuevo Leon	https://gem.wiki/Galeana_PV_solar_farm	L807278	G808632	ES0144580Y14	1	50	50	-99	40	80	120
solar	Spain	Europe	Southern Europe	Guillena solar farm				144	construction			PV						Iberdrola SA		37.3803	-5.9602	approximate	Seville				https://gem.wiki/Guillena_solar_farm	L824582	G827761	ES0144580Y14	1	144	144	-99	40	80	120
solar	Mexico	Americas	Latin America and the Caribbean	Hermosillo PV Solar Park		Parque Fotovoltaico Hermosillo		100	operating	2018		PV						Iberdrola SA		28.9622	-111.503	exact		Hermosillo		Sonora	https://gem.wiki/Hermosillo_PV_Solar_Park	L807279	G808633	ES0144580Y14	1	100	100	6	2058	2098	2138
solar	Spain	Europe	Southern Europe	Ibersol Ciudad Real CSP solar farm			Puertollano Solar Thermal, Ence Termollano	50	operating	2009		Solar Thermal						Iberdrola SA [90%]; IDAE (Instituto para la Diversificación y el Ahorro de la Energía) [10%]		38.6433	-3.975	exact		Campo de Calatrava	Ciudad Real	Castile-La Mancha	https://gem.wiki/Ibersol_Ciudad_Real_CSP_solar_farm	L824610	G827804	ES0144580Y14	0.9	50	50	15	2049	2089	2129
solar	Mexico	Americas	Latin America and the Caribbean	Laborcilla solar farm		Planta Solar Laborcilla		585	construction			PV						Iberdrola		22.763	-102.582	approximate				Zacatecas	https://gem.wiki/Laborcilla_solar_farm	L832540	G838104	ES0144580Y14	1	585	585	-99	40	80	120
solar	Spain	Europe	Southern Europe	Majada Alta solar farm				50	construction	2024		PV						Iberdrola SA		39.6511	-7.4991	approximate	Cedillo			Extremadura	https://gem.wiki/Majada_Alta_solar_farm	L824704	G827905	ES0144580Y14	1	50	50	0	2064	2104	2144
solar	Spain	Europe	Southern Europe	Manantiales solar farm				30	construction			PV						Iberdrola SA		40.6341	-3.1717	approximate	Guadalajara				https://gem.wiki/Manantiales_solar_farm	L824709	G827910	ES0144580Y14	1	30	30	-99	40	80	120
solar	Portugal	Europe	Southern Europe	Montechoro solar farm	2			25	construction			PV						Iberdrola SA		37.1006	-8.2281	approximate	Albufeira	Faro			https://gem.wiki/Montechoro_solar_farm	L824175	G827266	ES0144580Y14	1	36.6		-99	40	80	120
solar	Portugal	Europe	Southern Europe	Montechoro solar farm	1			11.6	construction			PV						Iberdrola SA		37.1006	-8.2281	approximate	Albufeira	Faro			https://gem.wiki/Montechoro_solar_farm	L824175	G827265	ES0144580Y14	1	36.6	36.6	-99	40	80	120
solar	Spain	Europe	Southern Europe	Morón de Almazán Hybrid solar farm				49.5	pre-construction			PV						Iberdrola SA		41.3892	-2.4272	exact			Soria	Castile and León	https://gem.wiki/Morón_de_Almazán_Hybrid_solar_farm	L824743	G827951	ES0144580Y14	1	49.5	49.5	-99	40	80	120
solar	Spain	Europe	Southern Europe	Núñez De Balboa solar farm	1			500	operating	2020		PV						Iberdrola SA		38.4533	-6.226	exact		Tierra de Barros	Badajoz	Extremadura	https://gem.wiki/Núñez_De_Balboa_solar_farm	L805862	G806744	ES0144580Y14	1	500	500	4	2060	2100	2140
solar	Spain	Europe	Southern Europe	Olmedilla solar farm	1		Iberdrola Olmedilla	42	operating	2022		PV						Iberdrola SA		39.6153	-2.1077	approximate	Olmedilla de Alarcón			Cuenca	https://gem.wiki/Olmedilla_solar_farm	L805879	G806764	ES0144580Y14	1	42	42	2	2062	2102	2142
solar	Spain	Europe	Southern Europe	Oriol solar farm				273.3	pre-construction			PV						Iberdrola SA		39.8221	-6.7734	approximate	Ceclavín				https://gem.wiki/Oriol_solar_farm	L824778	G827997	ES0144580Y14	1	273.3	273.3	-99	40	80	120
solar	Spain	Europe	Southern Europe	Otero solar farm			Otero Segovia	505	pre-construction			PV						Iberdrola SA		40.9796	-4.3668	approximate			Segovia	Castile and León	https://gem.wiki/Otero_solar_farm	L824782	G828002	ES0144580Y14	1	505	505	-99	40	80	120
solar	Spain	Europe	Southern Europe	Peñaflor (Iberdrola) solar farm				136.5	pre-construction			PV						Iberdrola SA		41.6791	-0.6937	approximate		Zaragoza		Aragon	https://gem.wiki/Peñaflor_(Iberdrola)_solar_farm	L824793	G828015	ES0144580Y14	1	136.5	136.5	-99	40	80	120
solar	Spain	Europe	Southern Europe	Peñarrubia solar farm				50	construction			PV						Iberdrola SA		43.2591	-4.5842	approximate	Peñarrubia				https://gem.wiki/Peñarrubia_solar_farm	L824796	G828019	ES0144580Y14	1	50	50	-99	40	80	120
solar	Spain	Europe	Southern Europe	Peralta solar farm				370	pre-construction			PV						Iberdrola		42.3358	-1.8117	approximate		Erriberagoiena / Ribera Alta	Navarre	Navarre	https://gem.wiki/Peralta_solar_farm	L824798	G828021	ES0144580Y14	1	370	370	-99	40	80	120
solar	Australia	Oceania	Australia and New Zealand	Port Augusta Renewable Energy Park solar farm				107	operating	2021		PV						Iberdrola SA		-32.4909	137.764	approximate	Port Augusta			South Australia	https://gem.wiki/Port_Augusta_Renewable_Energy_Park_solar_farm	L805594	G806436	ES0144580Y14	1	107	107	3	2061	2101	2141
solar	Spain	Europe	Southern Europe	PSF Ayora solar farm	1		PSF Ayora 1	200	pre-construction			PV						Iberdrola SA		39.2313	-1.0535	approximate	Cofrentes			Valencia	https://gem.wiki/PSF_Ayora_solar_farm	L805869	G806753	ES0144580Y14	1	200	200	-99	40	80	120
solar	Spain	Europe	Southern Europe	Puertollano Green Hydrogen Solar Plant	1			120	operating	2022		PV						Iberdrola SA		38.6927	-4.097	approximate	Puertollano			Ciudad Real	https://gem.wiki/Puertollano_Green_Hydrogen_Solar_Plant	L805875	G806760	ES0144580Y14	1	120	120	2	2062	2102	2142
solar	Spain	Europe	Southern Europe	Radona 1 Hybrid solar farm				24	pre-construction			PV						Iberdrola SA		41.2956	-2.4713	exact			Soria	Castile and León	https://gem.wiki/Radona_1_Hybrid_solar_farm	L824824	G828051	ES0144580Y14	1	24	24	-99	40	80	120
solar	Spain	Europe	Southern Europe	Radona 2 Hybrid solar farm				31.5	pre-construction			PV						Iberdrola SA		41.2956	-2.4713	exact			Soria	Castile and León	https://gem.wiki/Radona_2_Hybrid_solar_farm	L824825	G828052	ES0144580Y14	1	31.5	31.5	-99	40	80	120
solar	Spain	Europe	Southern Europe	Revilla-Vallejera solar farm				50	operating	2022		PV						Iberdrola SA		42.1462	-4.1598	exact			Burgos	Castile and León	https://gem.wiki/Revilla-Vallejera_solar_farm	L824831	G828058	ES0144580Y14	1	50	50	2	2062	2102	2142
solar	Spain	Europe	Southern Europe	Rivera solar farm				419.9	pre-construction	2024		PV						Iberdrola SA		37.3835	-6.8368	approximate		El Condado	Huelva	Andalusia	https://gem.wiki/Rivera_solar_farm	L824835	G828065	ES0144580Y14	1	419.9	419.9	0	2064	2104	2144
solar	Spain	Europe	Southern Europe	San Antonio (Iberdrola) solar farm				50	construction			PV						Iberdrola SA		39.6511	-7.4991	approximate	Cedillo				https://gem.wiki/San_Antonio_(Iberdrola)_solar_farm	L824848	G828086	ES0144580Y14	1	50	50	-99	40	80	120
solar	Mexico	Americas	Latin America and the Caribbean	Santiago Arriaga PV Solar Park		Parque Solar Fotovoltaico Santiago Arriaga	Parque Fotovoltaico San Luis Potosí	200	operating	2018		PV						Iberdrola SA		21.886	-101.23	exact			Villa de Arriaga	San Luis Potosí	https://gem.wiki/Santiago_Arriaga_PV_Solar_Park	L807280	G808634	ES0144580Y14	1	200	200	6	2058	2098	2138
solar	Portugal	Europe	Southern Europe	Santiago Do Cacem solar farm	1			285	pre-construction	2025		PV						Iberdrola SA [50%]; Prosolia INC [50%]		38.7155	-9.1234	approximate	Satiago do Caem			Lisbon	https://gem.wiki/Santiago_Do_Cacem_solar_farm	L806469	G807420	ES0144580Y14	0.5	1140		-1	2065	2105	2145
solar	Portugal	Europe	Southern Europe	Santiago Do Cacem solar farm	2			285	pre-construction	2025		PV						Iberdrola SA [50%]; Prosolia INC [50%]		38.7155	-9.1234	approximate	Satiago do Caem			Lisbon	https://gem.wiki/Santiago_Do_Cacem_solar_farm	L806469	G807421	ES0144580Y14	0.5	1140		-1	2065	2105	2145
solar	Portugal	Europe	Southern Europe	Santiago Do Cacem solar farm	3			285	pre-construction	2025		PV						Iberdrola SA [50%]; Prosolia INC [50%]		38.7155	-9.1234	approximate	Satiago do Caem			Lisbon	https://gem.wiki/Santiago_Do_Cacem_solar_farm	L806469	G807422	ES0144580Y14	0.5	1140		-1	2065	2105	2145
solar	Portugal	Europe	Southern Europe	Santiago Do Cacem solar farm	4			285	pre-construction	2025		PV						Iberdrola SA [50%]; Prosolia INC [50%]		38.7155	-9.1234	approximate	Satiago do Caem			Lisbon	https://gem.wiki/Santiago_Do_Cacem_solar_farm	L806469	G807423	ES0144580Y14	0.5	1140	1140	-1	2065	2105	2145
solar	Spain	Europe	Southern Europe	Tagus solar farm	1		Tagus Complex	95	construction	2023		PV						Iberdrola SA		39.6511	-7.4991	approximate	Cedillo				https://gem.wiki/Tagus_solar_farm	L824884	G828131	ES0144580Y14	1	380		1	2063	2103	2143
solar	Spain	Europe	Southern Europe	Tagus solar farm	2		Tagus Complex	95	construction	2023		PV						Iberdrola SA		39.6511	-7.4991	approximate	Cedillo				https://gem.wiki/Tagus_solar_farm	L824884	G828132	ES0144580Y14	1	380		1	2063	2103	2143
solar	Spain	Europe	Southern Europe	Tagus solar farm	3		Tagus Complex	95	construction	2023		PV						Iberdrola SA		39.6511	-7.4991	approximate	Cedillo				https://gem.wiki/Tagus_solar_farm	L824884	G828133	ES0144580Y14	1	380		1	2063	2103	2143
solar	Spain	Europe	Southern Europe	Tagus solar farm	4		Tagus Complex	95	construction	2023		PV						Iberdrola SA		39.6511	-7.4991	approximate	Cedillo				https://gem.wiki/Tagus_solar_farm	L824884	G828134	ES0144580Y14	1	380	380	1	2063	2103	2143
solar	Spain	Europe	Southern Europe	Valbuena solar farm				50	construction			PV						Iberdrola SA		40.6341	-3.1717	approximate	Guadalajara				https://gem.wiki/Valbuena_solar_farm	L824922	G828181	ES0144580Y14	1	50	50	-99	40	80	120
solar	Spain	Europe	Southern Europe	Vara del Rey solar farm				49.5	announced			PV						Iberdrola SA		39.4219	-2.2993	approximate			Cuenca	Castile-La Mancha	https://gem.wiki/Vara_del_Rey_solar_farm	L824939	G828200	ES0144580Y14	1	49.5	49.5	-99	40	80	120
solar	Spain	Europe	Southern Europe	Velilla PV solar farm	1		Velilla Solar	400	construction	2023		PV						Iberdrola SA		42.8181	-4.8536	exact	Velilla del Río Carrión		Palencia	Castile and León	https://gem.wiki/Velilla_PV_solar_farm	L805872	G806756	ES0144580Y14	1	400	400	1	2063	2103	2143
solar	Spain	Europe	Southern Europe	Villalba de Guardo (Iberdrola) solar farm			Iberdrola Palencia	350	construction			PV						Iberdrola SA		42.7216	-4.8233	approximate			Palencia	Castile and León	https://gem.wiki/Villalba_de_Guardo_(Iberdrola)_solar_farm	L824943	G828204	ES0144580Y14	1	350	350	-99	40	80	120
solar	Spain	Europe	Southern Europe	Villarino solar farm	1			191	construction			PV						Iberdrola SA		41.2732	-6.4623	approximate	Villarino de los Aires			Salamanca	https://gem.wiki/Villarino_solar_farm	L805873	G806757	ES0144580Y14	1	241		-99	40	80	120
solar	Spain	Europe	Southern Europe	Villarino solar farm	2			50	construction			PV						Iberdrola SA		41.2732	-6.4623	approximate	Villarino de los Aires			Salamanca	https://gem.wiki/Villarino_solar_farm	L805873	G806758	ES0144580Y14	1	241	241	-99	40	80	120
solar	Spain	Europe	Southern Europe	Virgen de Aremos 3 solar farm				50	construction			PV						Iberdrola SA		42.0049	-4.5261	approximate	Palencia				https://gem.wiki/Virgen_de_Aremos_3_solar_farm	L824952	G828218	ES0144580Y14	1	50		-99	40	80	120
solar	Spain	Europe	Southern Europe	Virgen de Areños solar farm				50	construction			PV						Iberdrola SA		41.9826	-4.7806	approximate			Palencia	Castile and León	https://gem.wiki/Virgen_de_Areños_solar_farm	L824953	G828219	ES0144580Y14	1	50	50	-99	40	80	120
wind	Cyprus	Asia	Western Asia	Agia Anna wind farm				20	operating	2011		onshore						Iberdrola SA		34.9724	33.4997	exact					https://gem.wiki/Agia_Anna_wind_farm	L911470	G914450	ES0144580Y14	1	20	20	13	2051	2091	2131
wind	Spain	Europe	Southern Europe	Alcarama wind farm	2		Valdemadera	45	operating	2003		onshore						Iberdrola Renovables Energia SA		42.0036	-2.0462	exact	Cervera del Río Alhama			Rioja	https://gem.wiki/Alcarama_wind_farm	L914508	G917970	ES0144580Y14	1	45	45	21	2043	2083	2123
wind	Spain	Europe	Southern Europe	Alcocero De Mola wind farm				104	shelved			onshore						Iberdrola Renovables Energia SA		42.4726	-3.3582	approximate	Alcocero de Mola		Burgos	Castilla y León	https://gem.wiki/Alcocero_De_Mola_wind_farm	L915727	G919437	ES0144580Y14	1	104	104	-99	40	80	120
wind	Spain	Europe	Southern Europe	Almendros wind farm	1			20	operating	2007		onshore						Iberdrola Renovables Energia SA		38.6577	-1.435	exact	Jumilla	Altiplano	Region of Murcia	Region of Murcia	https://gem.wiki/Almendros_wind_farm	L911471	G914451	ES0144580Y14	1	48		17	2047	2087	2127
wind	Spain	Europe	Southern Europe	Almendros wind farm	2			28	operating	2007		onshore						Iberdrola Renovables Energia SA		38.664	-1.4279	exact	Jumilla	Altiplano	Region of Murcia	Region of Murcia	https://gem.wiki/Almendros_wind_farm	L911471	G916193	ES0144580Y14	1	48	48	17	2047	2087	2127
wind	Spain	Europe	Southern Europe	Altamira wind farm (Spain)				49	operating	2009		onshore						Iberdrola Renovables Energia SA		37.029	-5.0101	exact		Guadalteba	Malaga	Andalusia	https://gem.wiki/Altamira_wind_farm_(Spain)	L914774	G918277	ES0144580Y14	1	49	49	15	2049	2089	2129
wind	Spain	Europe	Southern Europe	Alto De La Degollada wind farm				50	operating	2010		onshore						Iberdrola Renovables Energia SA		42.2883	-4.1388	approximate	Castrojeriz		Burgos	Castilla y León	https://gem.wiki/Alto_De_La_Degollada_wind_farm	L914837	G918369	ES0144580Y14	1	50	50	14	2050	2090	2130
wind	Portugal	Europe	Southern Europe	Alto Do Monção wind farm			Parque Eólico Alto do Monção	32	operating	2007		onshore						Iberdrola Renovables Energia SA		40.5033	-8.2657	exact		Viseu			https://gem.wiki/Alto_Do_Monção_wind_farm	L913482	G916765	ES0144580Y14	1	32	32	17	2047	2087	2127
wind	Spain	Europe	Southern Europe	Ameixeiras-Testeiros wind farm				50	operating	2002		onshore						Iberdrola Renovables Energia SA		42.5504	-8.2063	exact		O Deza		Galicia	https://gem.wiki/Ameixeiras-Testeiros_wind_farm	L914840	G918372	ES0144580Y14	1	50	50	22	2042	2082	2122
wind	Hungary	Europe	Eastern Europe	Amundsen wind farm				26	operating	2011		onshore						Iberdrola Renovables Energia SA		47.1982	16.8685	exact	Ikervár	Vas			https://gem.wiki/Amundsen_wind_farm	L912751	G915901	ES0144580Y14	1	26	26	13	2051	2091	2131
wind	Philippines	Asia	South-eastern Asia	Aparri Bay wind farm			Aparri Bay (Offshore) Wind Power Project, Windkraft Aparri Bay	700	pre-construction			offshore mount unknown						Triconti ECC Renewables CORP (TRICONTI); Iberdrola SA		18.4914	121.7	approximate				Cagayan Province	https://gem.wiki/Aparri_Bay_wind_farm	L901297	G927453	ES0144580Y14	0.5	700	700	-99	40	80	120
wind	Spain	Europe	Southern Europe	Argañoso wind farm				22	operating	2007		onshore						Iberdrola Renovables Energia SA		42.5341	-6.2886	exact			León	Castile and León	https://gem.wiki/Argañoso_wind_farm	L912018	G915070	ES0144580Y14	1	22	22	17	2047	2087	2127
wind	Brazil	Americas	Latin America and the Caribbean	Arizona 1 wind farm	1	Parque Eólico Arizona	Parque Eólico Arizona 1	28	operating	2013		onshore						Iberdrola Neoenergia		-5.3042	-35.382	exact	Rio do Fogo		Região Geográfica Intermediária de Natal	Rio Grande do Norte	https://gem.wiki/Arizona_1_wind_farm	L905333	G907063	ES0144580Y14	1	28	28	11	2053	2093	2133
wind	Spain	Europe	Southern Europe	Atalaya De La Solana wind farm				20	operating	2003		onshore						Iberdrola Renovables Energia SA		38.7598	-2.0552	exact			Albacete	Castile-La Mancha	https://gem.wiki/Atalaya_De_La_Solana_wind_farm	L911480	G914460	ES0144580Y14	1	20	20	21	2043	2083	2123
wind	Spain	Europe	Southern Europe	Ausejo-Ocón wind farm				50	pre-construction			onshore						Iberdrola Renovables La Rioja SA		42.2986	-2.2453	approximate	Ocón			La Rioja	https://gem.wiki/Ausejo-Ocón_wind_farm	L914851	G918387	ES0144580Y14	1	50	50	-99	40	80	120
wind	Spain	Europe	Southern Europe	Azáceta wind farm				40	construction	2024		onshore						Aixendar; Iberdrola SA		42.7851	-2.5438	approximate					https://gem.wiki/Azáceta_wind_farm	L920735	G925548	ES0144580Y14	0.5	40	40	0	2064	2104	2144
wind	Spain	Europe	Southern Europe	Badaia wind farm			Badaya	50	operating	2005		onshore						Iberdrola Renovables Energia SA		42.8502	-2.8551	exact		Gasteizko kuadrilla/Cuadrilla de Vitoria		Autonomous Community of the Basque Country	https://gem.wiki/Badaia_wind_farm	L914853	G918389	ES0144580Y14	1	50	50	19	2045	2085	2125
wind	Spain	Europe	Southern Europe	Ballestas wind farm			Ballestas-Casetona, Baca, Ballestas Et Casetona	42	operating	2019		onshore						Iberdrola Renovables Energia SA		42.2017	-4.1631	exact			Burgos	Castile and León	https://gem.wiki/Ballestas_wind_farm	L914329	G917760	ES0144580Y14	1	42	42	5	2059	2099	2139
wind	Germany	Europe	Western Europe	Baltic Eagle wind farm				476	pre-construction	2024		offshore hard mount						Iberdrola Renovables Energia SA		54.8506	13.8014	exact	Sagard				https://gem.wiki/Baltic_Eagle_wind_farm	L916195	G919992	ES0144580Y14	1	476	476	0	2064	2104	2144
wind	Ireland	Europe	Northern Europe	Barnesmore wind farm	1		Golagh	15	operating	1997		onshore							Iberdrola Renovables Energia SA	54.6976	-7.9378	exact		County Donegal			https://gem.wiki/Barnesmore_wind_farm	L910161	G912988	ES0144580Y14	1	15	15	27	2037	2077	2117
wind	Mexico	Americas	Latin America and the Caribbean	Bii Nee Stipa wind farm	1	Parque Eólico Bii Nee Stipa	Stipa Nayaá	26	operating	2010		onshore						Iberdrola Renovables Energia SA		16.5106	-94.9689	exact	Juchitán	Heroica Ciudad de Juchitán de Zaragoza		Oaxaca	https://gem.wiki/Bii_Nee_Stipa_wind_farm	L905220	G907109	ES0144580Y14	1	100		14	2050	2090	2130
wind	Mexico	Americas	Latin America and the Caribbean	Bii Nee Stipa wind farm	4	Parque Eólico Bii Nee Stipa	Stipa Nayaá, El Retiro	74	operating	2014		onshore						Iberdrola Renovables Energia SA		16.5106	-94.9689	exact	Juchitán	Heroica Ciudad de Juchitán de Zaragoza		Oaxaca	https://gem.wiki/Bii_Nee_Stipa_wind_farm	L905220	G907110	ES0144580Y14	1	100	100	10	2054	2094	2134
wind	Spain	Europe	Southern Europe	Boquerón (Iberdrola) wind farm			Sierra de Boqueron	22	operating			onshore						Iberdrola Renovables Energia SA		39.1711	-1.2278	exact	Villa de Ves		Albacete	Castile-La Mancha	https://gem.wiki/Boquerón_(Iberdrola)_wind_farm	L912032	G915086	ES0144580Y14	1	22	22	-99	40	80	120
wind	Spain	Europe	Southern Europe	Bordecorex Norte wind farm	1			18	operating	2006		onshore						Iberdrola Renovables Energia SA		41.3801	-2.7201	approximate	Velamazán		Soria	Castilla y León	https://gem.wiki/Bordecorex_Norte_wind_farm	L910994	G915909	ES0144580Y14	1	44		18	2046	2086	2126
wind	Spain	Europe	Southern Europe	Bordecorex Norte wind farm	2			26	operating	2006		onshore						Iberdrola Renovables Energia SA		41.3801	-2.7201	approximate	Velamazán		Soria	Castilla y León	https://gem.wiki/Bordecorex_Norte_wind_farm	L910994	G913917	ES0144580Y14	1	44	44	18	2046	2086	2126
wind	Spain	Europe	Southern Europe	Bullana wind farm				38	operating	2009		onshore						Iberdrola Renovables Energia SA		41.2596	-2.3801	exact			Soria	Castile and León	https://gem.wiki/Bullana_wind_farm	L914048	G917426	ES0144580Y14	1	38	38	15	2049	2089	2129
wind	Spain	Europe	Southern Europe	Buniel wind farm				114	construction	2023		onshore						Iberdrola Renovables Energia SA; Global Ottowa		42.2764	-3.7909	approximate	Albillos		Burgos	Castilla y León	https://gem.wiki/Buniel_wind_farm	L915766	G919489	ES0144580Y14	0.5	114	114	1	2063	2103	2143
wind	Spain	Europe	Southern Europe	Bureba wind farm				12	operating	2010		onshore						Iberdrola Renovables Energia SA		42.5408	-3.4101	exact			Burgos	Castile and León	https://gem.wiki/Bureba_wind_farm	L908797	G911519	ES0144580Y14	1	12	12	14	2050	2090	2130
wind	Spain	Europe	Southern Europe	Cabezuelo wind farm			El Cabezuelo	30	operating	2006		onshore						Iberdrola Renovables Energia SA		39.2333	-1.7501	exact			Albacete	Castile-La Mancha	https://gem.wiki/Cabezuelo_wind_farm	L913227	G916463	ES0144580Y14	1	30	30	18	2046	2086	2126
wind	Spain	Europe	Southern Europe	Cabimonteros wind farm				50	operating	2001		onshore						Iberdrola Renovables Energia SA		42.2476	-2.2543	exact				Rioja	https://gem.wiki/Cabimonteros_wind_farm	L914874	G918413	ES0144580Y14	1	50	50	23	2041	2081	2121
wind	Brazil	Americas	Latin America and the Caribbean	Caetité Neoenergia wind farm	1	Complexo Eólico Caetité (Neoenergia)		30	operating	2014		onshore						Iberdrola Neoenergia		-14.1846	-42.495	exact	Caetité		Região Geográfica Intermediária de Guanambi	Bahia	https://gem.wiki/Caetité_Neoenergia_wind_farm	L905334	G907064	ES0144580Y14	1	90		10	2054	2094	2134
wind	Brazil	Americas	Latin America and the Caribbean	Caetité Neoenergia wind farm	2	Complexo Eólico Caetité (Neoenergia)		30	operating	2014		onshore						Iberdrola Neoenergia		-14.1846	-42.495	exact	Caetité		Região Geográfica Intermediária de Guanambi	Bahia	https://gem.wiki/Caetité_Neoenergia_wind_farm	L905334	G907065	ES0144580Y14	1	90		10	2054	2094	2134
wind	Brazil	Americas	Latin America and the Caribbean	Caetité Neoenergia wind farm	3	Complexo Eólico Caetité (Neoenergia)		30	operating	2014		onshore						Iberdrola Neoenergia		-14.2194	-42.507	exact	Caetité		Região Geográfica Intermediária de Guanambi	Bahia	https://gem.wiki/Caetité_Neoenergia_wind_farm	L905334	G907066	ES0144580Y14	1	90	90	10	2054	2094	2134
wind	Brazil	Americas	Latin America and the Caribbean	Calangos wind farm	1	Complexo Eólico Calangos		30	operating	2016		onshore						Iberdrola Neoenergia		-6.0339	-36.544	exact	Bodó		Região Geográfica Intermediária de Caicó	Rio Grande do Norte	https://gem.wiki/Calangos_wind_farm	L905335	G907067	ES0144580Y14	1	234		8	2056	2096	2136
wind	Brazil	Americas	Latin America and the Caribbean	Calangos wind farm	2	Complexo Eólico Calangos		30	operating	2016		onshore						Iberdrola Neoenergia		-6.0166	-36.4835	exact	Bodó		Região Geográfica Intermediária de Caicó	Rio Grande do Norte	https://gem.wiki/Calangos_wind_farm	L905335	G907068	ES0144580Y14	1	234		8	2056	2096	2136
wind	Brazil	Americas	Latin America and the Caribbean	Calangos wind farm	3	Complexo Eólico Calangos		30	operating	2016		onshore						Iberdrola Neoenergia		-6.0489	-36.546	exact	Bodó		Região Geográfica Intermediária de Caicó	Rio Grande do Norte	https://gem.wiki/Calangos_wind_farm	L905335	G907069	ES0144580Y14	1	234		8	2056	2096	2136
wind	Brazil	Americas	Latin America and the Caribbean	Calangos wind farm	4	Complexo Eólico Calangos		30	operating	2016		onshore						Iberdrola Neoenergia		-6.0236	-36.472	exact	Bodó		Região Geográfica Intermediária de Caicó	Rio Grande do Norte	https://gem.wiki/Calangos_wind_farm	L905335	G907070	ES0144580Y14	1	234		8	2056	2096	2136
wind	Brazil	Americas	Latin America and the Caribbean	Calangos wind farm	5	Complexo Eólico Calangos		30	operating	2016		onshore						Iberdrola Neoenergia		-6.0303	-36.488	exact	Bodó		Região Geográfica Intermediária de Caicó	Rio Grande do Norte	https://gem.wiki/Calangos_wind_farm	L905335	G907071	ES0144580Y14	1	234		8	2056	2096	2136
wind	Brazil	Americas	Latin America and the Caribbean	Calangos wind farm	6	Complexo Eólico Calangos		30	operating	2016		onshore						Iberdrola Neoenergia		-6.0005	-36.4498	exact	Bodó		Região Geográfica Intermediária de Caicó	Rio Grande do Norte	https://gem.wiki/Calangos_wind_farm	L905335	G907072	ES0144580Y14	1	234		8	2056	2096	2136
wind	Brazil	Americas	Latin America and the Caribbean	Calangos wind farm	Santana 1	Complexo Eólico Calangos		30	operating	2016		onshore						Iberdrola Neoenergia		-6.0535	-36.4556	exact	Bodó		Região Geográfica Intermediária de Caicó	Rio Grande do Norte	https://gem.wiki/Calangos_wind_farm	L905335	G907073	ES0144580Y14	1	234		8	2056	2096	2136
wind	Brazil	Americas	Latin America and the Caribbean	Calangos wind farm	Santana 2	Complexo Eólico Calangos		24	operating	2016		onshore						Iberdrola Neoenergia		-6.0428	-36.464	exact	Lagoa Nova		Região Geográfica Intermediária de Caicó	Rio Grande do Norte	https://gem.wiki/Calangos_wind_farm	L905335	G907074	ES0144580Y14	1	234	234	8	2056	2096	2136
wind	Spain	Europe	Southern Europe	Callejas wind farm				50	operating	2004		onshore						Iberdrola Renovables Energia SA		39.633	-1.8131	exact			Cuenca	Castile-La Mancha	https://gem.wiki/Callejas_wind_farm	L914876	G918416	ES0144580Y14	1	50	50	20	2044	2084	2124
wind	Spain	Europe	Southern Europe	Campalbo wind farm				49	operating	2002		onshore						Iberdrola Renovables Energia SA		39.8878	-1.2496	exact	Graja de Campalbo		Cuenca	Castile-La Mancha	https://gem.wiki/Campalbo_wind_farm	L914777	G918282	ES0144580Y14	1	49	49	22	2042	2082	2122
wind	Spain	Europe	Southern Europe	Campisábalos wind farm				24	operating	2002		onshore						Iberdrola Renovables Energia SA		41.2965	-3.1729	exact	Campisábalos		Guadalajara	Castile-La Mancha	https://gem.wiki/Campisábalos_wind_farm	L912352	G915452	ES0144580Y14	1	24	24	22	2042	2082	2122
wind	Spain	Europe	Southern Europe	Canalejas wind farm				19	operating	2005		onshore						Iberdrola Renovables Energia SA		39.8501	-0.7501	exact		Castelló / Castellón		Valencian Community	https://gem.wiki/Canalejas_wind_farm	L911360	G914329	ES0144580Y14	1	19	19	19	2045	2085	2125
wind	Spain	Europe	Southern Europe	Cañoneras wind farm	1			18	operating	2008		onshore						Iberdrola Renovables Energia SA; Siroco Capital SCR SA		43.1448	-3.4958	exact	Soba	Asón-Agüera		Cantabria	https://gem.wiki/Cañoneras_wind_farm	L909831	G913931	ES0144580Y14	0.5	32		16	2048	2088	2128
wind	Spain	Europe	Southern Europe	Cañoneras wind farm	2			14	operating	2010		onshore						Iberdrola Renovables Energia SA; Siroco Capital SCR SA		43.1448	-3.4958	exact	Soba	Asón-Agüera		Cantabria	https://gem.wiki/Cañoneras_wind_farm	L909831	G912618	ES0144580Y14	0.5	32	32	14	2050	2090	2130
wind	Spain	Europe	Southern Europe	Cantalojas wind farm				18	operating	2004		onshore						Iberdrola Renovables Energia SA		41.2301	-3.2401	approximate	Cantalojas		Guadalajara	Castilla La Mancha	https://gem.wiki/Cantalojas_wind_farm	L911008	G913932	ES0144580Y14	1	18	18	20	2044	2084	2124
wind	Spain	Europe	Southern Europe	Capiechamartín wind farm				34	operating	2021		onshore						Iberdrola Renovables Energia SA		43.4357	-6.6075	exact	Tineo		Asturias	Asturias	https://gem.wiki/Capiechamartín_wind_farm	L913685	G917013	ES0144580Y14	1	34	34	3	2061	2101	2141
wind	Spain	Europe	Southern Europe	Capiruza wind farm	1		Capiruza IA	26	operating	2003		onshore						Iberdrola Renovables Energia SA		38.7854	-1.9917	exact			Albacete	Castile-La Mancha	https://gem.wiki/Capiruza_wind_farm	L912355	G917768	ES0144580Y14	1	92		21	2043	2083	2123
wind	Spain	Europe	Southern Europe	Capiruza wind farm	2			42	operating	2003		onshore						Iberdrola Renovables Energia SA		38.7854	-1.9917	exact			Albacete	Castile-La Mancha	https://gem.wiki/Capiruza_wind_farm	L912355	G915455	ES0144580Y14	1	92		21	2043	2083	2123
wind	Spain	Europe	Southern Europe	Capiruza wind farm	1 Ampliacíon		Capiruza IB	24	operating	2014		onshore						Iberdrola Renovables Energia SA		38.7854	-1.9917	exact			Albacete	Castile-La Mancha	https://gem.wiki/Capiruza_wind_farm	L912355	G915914	ES0144580Y14	1	92	92	10	2054	2094	2134
wind	Spain	Europe	Southern Europe	Carrascosa wind farm				38	operating	2006		onshore						Iberdrola Renovables Energia SA		40.0093	-2.761	exact	Campos del Paraíso		Cuenca	Castile-La Mancha	https://gem.wiki/Carrascosa_wind_farm	L914054	G917432	ES0144580Y14	1	38	38	18	2046	2086	2126
wind	Spain	Europe	Southern Europe	Carrasquillo wind farm				49	operating	2003		onshore						Iberdrola Renovables Energia SA		42.2295	-4.1778	exact			Burgos	Castile and León	https://gem.wiki/Carrasquillo_wind_farm	L914778	G918283	ES0144580Y14	1	49	49	21	2043	2083	2123
wind	Spain	Europe	Southern Europe	Castrobarto wind farm				44	announced			onshore						Iberdrola Renovables Energia SA		42.3448	-3.6812	approximate	Valle de Mena		Burgos	Castilla y León	https://gem.wiki/Castrobarto_wind_farm	L914455	G917911	ES0144580Y14	1	44	44	-99	40	80	120
wind	Portugal	Europe	Southern Europe	Catefica wind farm			Parque Eólico Catefica	18	operating	2005		onshore						Iberdrola Renovables Energia SA		39.0501	-9.2301	exact	Dois Portos e Runa	Lisbon			https://gem.wiki/Catefica_wind_farm	L911010	G913934	ES0144580Y14	1	18	18	19	2045	2085	2125
wind	Spain	Europe	Southern Europe	Cavar wind farm	1		Cavar onshore wind farm complex	28	operating	2020		onshore						Iberdrola Renovables Energia SA		42.2182	-1.693	approximate	Cadreita			Navarra	https://gem.wiki/Cavar_wind_farm	L913009	G916213	ES0144580Y14	1	112		4	2060	2100	2140
wind	Spain	Europe	Southern Europe	Cavar wind farm	2		Cavar onshore wind farm complex	28	operating	2020		onshore						Iberdrola Renovables Energia SA		42.2182	-1.693	approximate	Cadreita			Navarra	https://gem.wiki/Cavar_wind_farm	L913009	G916214	ES0144580Y14	1	112		4	2060	2100	2140
wind	Spain	Europe	Southern Europe	Cavar wind farm	3		Cavar onshore wind farm complex	56	operating	2020		onshore						Iberdrola Renovables Energia SA		42.2182	-1.693	approximate	Cadreita			Navarra	https://gem.wiki/Cavar_wind_farm	L913009	G918815	ES0144580Y14	1	112	112	4	2060	2100	2140
wind	Spain	Europe	Southern Europe	Cerro Blanco (Acciona Energía/Iberdrola) wind farm			Cerroblanco	48	operating	2007		onshore						Acciona Energía; Iberdrola SA		38.7315	-2.4171	exact			Albacete	Castile-La Mancha	https://gem.wiki/Cerro_Blanco_(Acciona_Energía/Iberdrola)_wind_farm	L914671	G918157	ES0144580Y14	0.5	48	48	17	2047	2087	2127
wind	Spain	Europe	Southern Europe	Cerro Blanco (Iberdrola) wind farm				42	operating	2008		onshore						Iberdrola Renovables Energia SA		42.5375	-3.4066	exact			Burgos	Castile and León	https://gem.wiki/Cerro_Blanco_(Iberdrola)_wind_farm	L914337	G917770	ES0144580Y14	1	42	42	16	2048	2088	2128
wind	Spain	Europe	Southern Europe	Cerro Calderón wind farm	1			50	operating	2004		onshore						Iberdrola Renovables Energia SA		39.4544	-2.2418	exact			Cuenca	Castile-La Mancha	https://gem.wiki/Cerro_Calderón_wind_farm	L914885	G918429	ES0144580Y14	1	50	50	20	2044	2084	2124
wind	Honduras	Americas	Latin America and the Caribbean	Cerro De Hula wind farm	1	Proyecto Eólico Cerro de Hula	Parque Eólico Santa Ana	102	operating	2011		onshore						Iberdrola SA		13.9354	-87.2374	exact		Santa Ana		Francisco Morazán	https://gem.wiki/Cerro_De_Hula_wind_farm	L905586	G907674	ES0144580Y14	1	102	102	13	2051	2091	2131
wind	Spain	Europe	Southern Europe	Cerro De La Higuera wind farm				44	operating	2009		onshore						Iberdrola Renovables Energia SA		36.9258	-4.8848	exact		Guadalteba	Malaga	Andalusia	https://gem.wiki/Cerro_De_La_Higuera_wind_farm	L914456	G917912	ES0144580Y14	1	44	44	15	2049	2089	2129
wind	Spain	Europe	Southern Europe	Cerro De La Punta wind farm				24	operating	1999		onshore							Iberdrola Renovables Energia SA	38.9864	-1.3847	exact			Albacete	Castile-La Mancha	https://gem.wiki/Cerro_De_La_Punta_wind_farm	L912361	G915461	ES0144580Y14	1	24	24	25	2039	2079	2119
wind	Spain	Europe	Southern Europe	Cerro De La Silla wind farm				15	operating	2005		onshore						Iberdrola Renovables Energia SA		38.806	-0.9529	exact	Almansa		Albacete	Castile-La Mancha	https://gem.wiki/Cerro_De_La_Silla_wind_farm	L910187	G913016	ES0144580Y14	1	15	15	19	2045	2085	2125
wind	Spain	Europe	Southern Europe	Cerro Del Palo wind farm				50	operating	2004		onshore						Iberdrola Renovables Energia SA		39.4511	-2.227	exact			Cuenca	Castile-La Mancha	https://gem.wiki/Cerro_Del_Palo_wind_farm	L914887	G918431	ES0144580Y14	1	50	50	20	2044	2084	2124
wind	Spain	Europe	Southern Europe	Cerro Revolcado wind farm				26	operating	2004		onshore						Iberdrola Renovables Energia SA		38.7292	-1.0762	exact			Albacete	Castile-La Mancha	https://gem.wiki/Cerro_Revolcado_wind_farm	L912764	G915917	ES0144580Y14	1	26	26	20	2044	2084	2124
wind	Spain	Europe	Southern Europe	Cerro Vicente wind farm	1			39	operating	2003		onshore						Iberdrola Renovables Energia SA		38.8299	-1.6816	exact	Chinchilla de Monte-Aragón		Albacete	Castile-La Mancha	https://gem.wiki/Cerro_Vicente_wind_farm	L913233	G917513	ES0144580Y14	1	69		21	2043	2083	2123
wind	Spain	Europe	Southern Europe	Cerro Vicente wind farm	2			30	operating	2003		onshore						Iberdrola Renovables Energia SA		38.8299	-1.6816	exact	Chinchilla de Monte-Aragón		Albacete	Castile-La Mancha	https://gem.wiki/Cerro_Vicente_wind_farm	L913233	G916469	ES0144580Y14	1	69	69	21	2043	2083	2123
wind	Brazil	Americas	Latin America and the Caribbean	Chafariz wind farm	1	Complexo Eólico Chafariz		35	operating	2021		onshore						Iberdrola Neoenergia		-6.9729	-36.8793	exact	Santa Luzia	Região Metropolitana de Patos	Região Geográfica Intermediária de Patos	Paraíba	https://gem.wiki/Chafariz_wind_farm	L905336	G907075	ES0144580Y14	1	475		3	2061	2101	2141
wind	Brazil	Americas	Latin America and the Caribbean	Chafariz wind farm	2	Complexo Eólico Chafariz		35	operating	2021		onshore						Iberdrola Neoenergia		-6.9968	-36.894	exact	Santa Luzia	Região Metropolitana de Patos	Região Geográfica Intermediária de Patos	Paraíba	https://gem.wiki/Chafariz_wind_farm	L905336	G907076	ES0144580Y14	1	475		3	2061	2101	2141
wind	Brazil	Americas	Latin America and the Caribbean	Chafariz wind farm	3	Complexo Eólico Chafariz		35	operating	2021		onshore						Iberdrola Neoenergia		-7.0016	-36.8983	exact	Santa Luzia	Região Metropolitana de Patos	Região Geográfica Intermediária de Patos	Paraíba	https://gem.wiki/Chafariz_wind_farm	L905336	G907077	ES0144580Y14	1	475		3	2061	2101	2141
wind	Brazil	Americas	Latin America and the Caribbean	Chafariz wind farm	4	Complexo Eólico Chafariz		35	operating	2021		onshore						Iberdrola Neoenergia		-7.0337	-36.9355	exact		Região Metropolitana de Patos	Região Geográfica Intermediária de Patos	Paraíba	https://gem.wiki/Chafariz_wind_farm	L905336	G907078	ES0144580Y14	1	475		3	2061	2101	2141
wind	Brazil	Americas	Latin America and the Caribbean	Chafariz wind farm	5	Complexo Eólico Chafariz		35	operating	2021		onshore						Iberdrola Neoenergia		-7.0039	-36.9131	exact	Santa Luzia	Região Metropolitana de Patos	Região Geográfica Intermediária de Patos	Paraíba	https://gem.wiki/Chafariz_wind_farm	L905336	G907079	ES0144580Y14	1	475		3	2061	2101	2141
wind	Brazil	Americas	Latin America and the Caribbean	Chafariz wind farm	6	Complexo Eólico Chafariz		31	operating	2021		onshore						Iberdrola Neoenergia		-6.9786	-36.8539	exact	Santa Luzia	Região Metropolitana de Patos	Região Geográfica Intermediária de Patos	Paraíba	https://gem.wiki/Chafariz_wind_farm	L905336	G907080	ES0144580Y14	1	475		3	2061	2101	2141
wind	Brazil	Americas	Latin America and the Caribbean	Chafariz wind farm	7	Complexo Eólico Chafariz		35	operating	2021		onshore						Iberdrola Neoenergia		-6.924	-36.8607	exact	Santa Luzia	Região Metropolitana de Patos	Região Geográfica Intermediária de Patos	Paraíba	https://gem.wiki/Chafariz_wind_farm	L905336	G907081	ES0144580Y14	1	475		3	2061	2101	2141
wind	Brazil	Americas	Latin America and the Caribbean	Chafariz wind farm	Canoas 2	Complexo Eólico Chafariz		35	operating	2021		onshore						Iberdrola Neoenergia		-6.8825	-36.7914	exact	Santa Luzia	Região Metropolitana de Patos	Região Geográfica Intermediária de Patos	Paraíba	https://gem.wiki/Chafariz_wind_farm	L905336	G907082	ES0144580Y14	1	475		3	2061	2101	2141
wind	Brazil	Americas	Latin America and the Caribbean	Chafariz wind farm	Canoas 3	Complexo Eólico Chafariz		35	operating	2021		onshore						Iberdrola Neoenergia		-6.8722	-36.7594	exact		Região Metropolitana de Patos	Região Geográfica Intermediária de Patos	Paraíba	https://gem.wiki/Chafariz_wind_farm	L905336	G907083	ES0144580Y14	1	475		3	2061	2101	2141
wind	Brazil	Americas	Latin America and the Caribbean	Chafariz wind farm	Canoas 4	Complexo Eólico Chafariz		35	operating	2021		onshore						Iberdrola Neoenergia		-6.8436	-36.7355	exact	São José do Sabugi	Região Metropolitana de Patos	Região Geográfica Intermediária de Patos	Paraíba	https://gem.wiki/Chafariz_wind_farm	L905336	G907084	ES0144580Y14	1	475		3	2061	2101	2141
wind	Brazil	Americas	Latin America and the Caribbean	Chafariz wind farm	Lagoa 3	Complexo Eólico Chafariz		35	operating	2021		onshore						Iberdrola Neoenergia		-6.8712	-36.8262	exact	São José do Sabugi	Região Metropolitana de Patos	Região Geográfica Intermediária de Patos	Paraíba	https://gem.wiki/Chafariz_wind_farm	L905336	G907085	ES0144580Y14	1	475		3	2061	2101	2141
wind	Brazil	Americas	Latin America and the Caribbean	Chafariz wind farm	Lagoa 4	Complexo Eólico Chafariz		21	operating	2021		onshore						Iberdrola Neoenergia		-6.8824	-36.8415	exact	Santa Luzia	Região Metropolitana de Patos	Região Geográfica Intermediária de Patos	Paraíba	https://gem.wiki/Chafariz_wind_farm	L905336	G907086	ES0144580Y14	1	475		3	2061	2101	2141
wind	Brazil	Americas	Latin America and the Caribbean	Chafariz wind farm	Ventos de Arapuá 1	Complexo Eólico Chafariz		24	operating	2021		onshore						Iberdrola Neoenergia		-7.0482	-36.9524	exact		Região Metropolitana de Patos	Região Geográfica Intermediária de Patos	Paraíba	https://gem.wiki/Chafariz_wind_farm	L905336	G907087	ES0144580Y14	1	475		3	2061	2101	2141
wind	Brazil	Americas	Latin America and the Caribbean	Chafariz wind farm	Ventos de Arapuá 2	Complexo Eólico Chafariz		35	operating	2021		onshore						Iberdrola Neoenergia		-7.0292	-36.9624	exact		Região Metropolitana de Patos	Região Geográfica Intermediária de Patos	Paraíba	https://gem.wiki/Chafariz_wind_farm	L905336	G907088	ES0144580Y14	1	475		3	2061	2101	2141
wind	Brazil	Americas	Latin America and the Caribbean	Chafariz wind farm	Ventos de Arapuá 3	Complexo Eólico Chafariz		14	operating	2021		onshore						Iberdrola Neoenergia		-7.0508	-36.9679	exact		Região Metropolitana de Patos	Região Geográfica Intermediária de Patos	Paraíba	https://gem.wiki/Chafariz_wind_farm	L905336	G907089	ES0144580Y14	1	475	475	3	2061	2101	2141
wind	Spain	Europe	Southern Europe	Chimiche wind farm	2			18	operating	2018		onshore						Iberdrola Renovables Energia SA [50%]; Inversiones Financieras Isla de Tenerife SL [50%]		28.1121	-16.5057	exact			Santa Cruz de Tenerife		https://gem.wiki/Chimiche_wind_farm	L911017	G913942	ES0144580Y14	0.5	18	18	6	2058	2098	2138
wind	Spain	Europe	Southern Europe	Chorreaderos wind farm	Altos			21	operating			onshore						Iberdrola Renovables Energia SA		36.6901	-6.1301	approximate	Jerez de la Frontera		Cádiz	Andalucía	https://gem.wiki/Chorreaderos_wind_farm	L911836	G914861	ES0144580Y14	1	51		-99	40	80	120
wind	Spain	Europe	Southern Europe	Chorreaderos wind farm	Bajos			30	operating			onshore						Iberdrola Renovables Energia SA		36.6801	-6.1301	approximate	Jerez de la Frontera		Cádiz	Andalucía	https://gem.wiki/Chorreaderos_wind_farm	L911836	G916471	ES0144580Y14	1	51	51	-99	40	80	120
wind	Spain	Europe	Southern Europe	Clares wind farm				32	operating	2006		onshore						Iberdrola Renovables Energia SA		41.0337	-2.1434	exact	Maranchón		Guadalajara	Castile-La Mancha	https://gem.wiki/Clares_wind_farm	L913497	G916782	ES0144580Y14	1	32	32	18	2046	2086	2126
wind	Ireland	Europe	Northern Europe	Clarus wind farm				1000	announced			offshore floating						DP Energy; Iberdrola SA		52.7101	-10.2701	approximate					https://gem.wiki/Clarus_wind_farm	L916291	G920103	ES0144580Y14	0.5	1000	1000	-99	40	80	120
wind	Spain	Europe	Southern Europe	Conesa wind farm	2			32	operating			onshore						Iberdrola Renovables Energia SA		41.5062	1.2624	exact	Conesa	Conca de Barberà	Tarragona	Catalonia	https://gem.wiki/Conesa_wind_farm	L913012	G916783	ES0144580Y14	1	32	32	-99	40	80	120
wind	Spain	Europe	Southern Europe	Conquista De La Sierra wind farm				50	pre-construction			onshore						Iberdrola Renovables Energia SA		39.3301	-5.7306	approximate	Conquista de la Sierra		Trujillo	Extremadura	https://gem.wiki/Conquista_De_La_Sierra_wind_farm	L914899	G918447	ES0144580Y14	1	50	50	-99	40	80	120
wind	Spain	Europe	Southern Europe	Cordel-Vidural wind farm				37	operating	2021		onshore						Iberdrola Renovables Energia SA		43.5391	-6.7234	approximate	Navia			Asturias	https://gem.wiki/Cordel-Vidural_wind_farm	L913989	G917361	ES0144580Y14	1	37	37	3	2061	2101	2141
wind	Spain	Europe	Southern Europe	Cortijo La Linera wind farm				28	operating	2008		onshore						Iberdrola Renovables Energia SA		38.1144	-2.5711	exact	Santiago-Pontones		Jaén	Andalusia	https://gem.wiki/Cortijo_La_Linera_wind_farm	L913013	G916218	ES0144580Y14	1	28	28	16	2048	2088	2128
wind	Spain	Europe	Southern Europe	Cruz De Carrutero wind farm				40	operating	2011		onshore						Iberdrola Renovables Energia SA		42.2505	-4.7189	exact			Palencia	Castile and León	https://gem.wiki/Cruz_De_Carrutero_wind_farm	L914201	G917605	ES0144580Y14	1	40	40	13	2051	2091	2131
wind	Spain	Europe	Southern Europe	Cruz wind farm	1		Cruz San Martin	40	operating	2003		onshore						Iberdrola Renovables Energia SA		39.858	-1.5798	exact			Cuenca	Castile-La Mancha	https://gem.wiki/Cruz_wind_farm	L912769	G917606	ES0144580Y14	1	66		21	2043	2083	2123
wind	Spain	Europe	Southern Europe	Cruz wind farm	2		Cruz San Martin	26	operating	2003		onshore						Iberdrola Renovables Energia SA		39.858	-1.5798	exact			Cuenca	Castile-La Mancha	https://gem.wiki/Cruz_wind_farm	L912769	G915922	ES0144580Y14	1	66	66	21	2043	2083	2123
wind	Hungary	Europe	Eastern Europe	Csoma wind farm	1			38	operating	2010		onshore						Iberdrola Renovables Energia SA		47.2033	16.859	approximate	Komárom	Komárom-Esztergom			https://gem.wiki/Csoma_wind_farm	L914058	G917436	ES0144580Y14	1	38	38	14	2050	2090	2130
wind	Spain	Europe	Southern Europe	Cuesta Colorada wind farm				50	operating	2003		onshore						Iberdrola Renovables Energia SA		39.4663	-2.2057	exact			Cuenca	Castile-La Mancha	https://gem.wiki/Cuesta_Colorada_wind_farm	L914903	G918451	ES0144580Y14	1	50	50	21	2043	2083	2123
wind	Taiwan	Asia	Eastern Asia	Da Chungbu floating wind farm		大中部, 大中部離岸風力發電計畫, 大中部離岸風電	Da Zhongbu, Great Central Offshore wind farm, Da Chung Bu	1800	shelved			offshore floating						Iberdrola Renewables INC		24.4284	120.249	approximate				Taichung County	https://gem.wiki/Da_Chungbu_floating_wind_farm	L916904	G920978	ES0144580Y14	1	1800	1800	-99	40	80	120
wind	Spain	Europe	Southern Europe	Dólar wind farm	1			50	operating	2006		onshore						Iberdrola Renovables Energia SA		37.1766	-2.9502	exact		Comarca de Guadix	Granada	Andalusia	https://gem.wiki/Dólar_wind_farm	L914907	G918455	ES0144580Y14	1	100		18	2046	2086	2126
wind	Spain	Europe	Southern Europe	Dólar wind farm	3			50	operating	2006		onshore						Iberdrola Renovables Energia SA		37.1766	-2.9502	exact		Comarca de Guadix	Granada	Andalusia	https://gem.wiki/Dólar_wind_farm	L914907	G918456	ES0144580Y14	1	100	100	18	2046	2086	2126
wind	Spain	Europe	Southern Europe	Doña Benita Cuéllar wind farm				32	operating	2008		onshore						Iberdrola Renovables Energia SA		36.5892	-5.9911	exact	Jerez	Campiña de Jerez	Cádiz	Andalusia	https://gem.wiki/Doña_Benita_Cuéllar_wind_farm	L913500	G916786	ES0144580Y14	1	32	32	16	2048	2088	2128
wind	Mexico	Americas	Latin America and the Caribbean	Dos Arbolitos wind farm		Parque Eólico Dos Arbolitos	Bii Nee Stipa II Fase IV	70	operating	2014		onshore						Iberdrola Renovables Energia SA		16.5119	-94.9462	exact		Heroica Ciudad de Juchitán de Zaragoza		Oaxaca	https://gem.wiki/Dos_Arbolitos_wind_farm	L905343	G907111	ES0144580Y14	1	70	70	10	2054	2094	2134
wind	Spain	Europe	Southern Europe	Dos Pueblos wind farm				20	operating	2008		onshore						Iberdrola Renovables Energia SA		41.2801	-2.9401	approximate	Miedes de Atienza		Guadalajara	Castilla La Mancha	https://gem.wiki/Dos_Pueblos_wind_farm	L911533	G914521	ES0144580Y14	1	20	20	16	2048	2088	2128
wind	Spain	Europe	Southern Europe	El Candal wind farm				38	operating	2012		onshore						Iberdrola Renovables Energia SA		43.3983	-6.9301	exact			Asturias	Asturias	https://gem.wiki/El_Candal_wind_farm	L914059	G917437	ES0144580Y14	1	38	38	12	2052	2092	2132
wind	Spain	Europe	Southern Europe	El Carril wind farm				28	operating	2008		onshore						Iberdrola Renovables Energia SA		42.2884	-4.1406	approximate	Castrojeriz		Burgos	Castilla y León	https://gem.wiki/El_Carril_wind_farm	L913021	G916226	ES0144580Y14	1	28	28	16	2048	2088	2128
wind	Spain	Europe	Southern Europe	El Centenar wind farm				40	operating	2009		onshore						Iberdrola Renovables Energia SA		36.539	-5.3868	exact		Serranía de Ronda	Malaga	Andalusia	https://gem.wiki/El_Centenar_wind_farm	L914205	G917610	ES0144580Y14	1	40	40	15	2049	2089	2129
wind	Spain	Europe	Southern Europe	El Escuchadero wind farm				38	cancelled			onshore						Iberdrola Renovables Energia SA		43.3983	-3.7389	approximate	San Miguel de Aguayo			Cantabria	https://gem.wiki/El_Escuchadero_wind_farm	L914060	G917438	ES0144580Y14	1	38	38	-99	40	80	120
wind	Spain	Europe	Southern Europe	El Navazo wind farm	1			30	operating	2003		onshore						Iberdrola Renovables Energia SA		42.2501	-4.2001	approximate	Pedrosa del Príncipe (BU)		Burgos	Castilla y León	https://gem.wiki/El_Navazo_wind_farm	L913246	G916485	ES0144580Y14	1	30	30	21	2043	2083	2123
wind	Spain	Europe	Southern Europe	El Pradillo wind farm				23	operating	2020		onshore						Iberdrola Renovables Energia SA		41.877	-1.497	exact	Borja	Campo de Borja		Aragon	https://gem.wiki/El_Pradillo_wind_farm	L912210	G915293	ES0144580Y14	1	23	23	4	2060	2100	2140
wind	Spain	Europe	Southern Europe	El Puntal wind farm	2			15	operating	2022		onshore						Iberdrola Renovables Energia SA		37.1244	-4.8686	approximate	Sierra de Yeguas		Málaga	Andalucía	https://gem.wiki/El_Puntal_wind_farm	L910219	G913051	ES0144580Y14	1	15	15	2	2062	2102	2142
wind	Spain	Europe	Southern Europe	El Romeral wind farm				14	operating			onshore						Iberdrola Renovables Energia SA		38.9186	-1.7228	exact	Chinchilla de Monte-Aragón		Albacete	Castile-La Mancha	https://gem.wiki/El_Romeral_wind_farm	L909850	G912639	ES0144580Y14	1	14	14	-99	40	80	120
wind	Spain	Europe	Southern Europe	El Saucito wind farm			Saucito Fase B	30	operating	2009		onshore						Iberdrola Renovables Energia SA		37.5802	-7.1459	exact		El Andévalo	Huelva	Andalusia	https://gem.wiki/El_Saucito_wind_farm	L913248	G916487	ES0144580Y14	1	30	30	15	2049	2089	2129
wind	Spain	Europe	Southern Europe	El Segredal wind farm				36	operating	2012		onshore						Iberdrola Renovables Energia SA		43.4213	-6.6653	exact			Asturias	Asturias	https://gem.wiki/El_Segredal_wind_farm	L913874	G917227	ES0144580Y14	1	36	36	12	2052	2092	2132
wind	Spain	Europe	Southern Europe	El Sombrío wind farm				28	operating	2008		onshore						Iberdrola Renovables Energia SA		42.4301	-3.7301	approximate	Merindad del Río Ubierna		Burgos	Castilla y León	https://gem.wiki/El_Sombrío_wind_farm	L913023	G916228	ES0144580Y14	1	28	28	16	2048	2088	2128
wind	Spain	Europe	Southern Europe	El Tablado wind farm				20	operating	2003		onshore						Iberdrola Renovables Energia SA		41.693	-1.8344	exact			Soria	Castile and León	https://gem.wiki/El_Tablado_wind_farm	L911542	G914533	ES0144580Y14	1	20	20	21	2043	2083	2123
wind	Spain	Europe	Southern Europe	El Teruelo wind farm				43	operating	2003		onshore						Iberdrola Renovables Energia SA		42.2201	-4.2701	exact			Palencia	Castile and León	https://gem.wiki/El_Teruelo_wind_farm	L914424	G917875	ES0144580Y14	1	43	43	21	2043	2083	2123
wind	Spain	Europe	Southern Europe	El Vallito wind farm				13	pre-construction			onshore						Iberdrola Renovables Energia SA		37.1392	-3.6705	approximate	Chimiche		Santa Cruz de Tenerife	Las Islas Canarias	https://gem.wiki/El_Vallito_wind_farm	L909527	G912285	ES0144580Y14	1	13	13	-99	40	80	120
wind	Spain	Europe	Southern Europe	Elgea wind farm			Sierra de Elgea, Sierra Elgea	24	operating	2000		onshore						Iberdrola Renovables Energia SA		42.9625	-2.4892	exact		Arabako lautada/Llanada Alavesa		Autonomous Community of the Basque Country	https://gem.wiki/Elgea_wind_farm	L912382	G915484	ES0144580Y14	1	24	24	24	2040	2080	2120
wind	Spain	Europe	Southern Europe	Elgea-Urkilla wind farm			Urkilla	32	operating	2003		onshore						Iberdrola Renovables Energia SA		42.9575	-2.4458	exact		Debagoiena		Autonomous Community of the Basque Country	https://gem.wiki/Elgea-Urkilla_wind_farm	L913502	G916790	ES0144580Y14	1	32	32	21	2043	2083	2123
wind	Spain	Europe	Southern Europe	Encinillas wind farm				23	operating	2020		onshore						Iberdrola Renovables Energia SA		42.1529	-4.6922	approximate	Paredes de Nava		Palencia	Castilla y León	https://gem.wiki/Encinillas_wind_farm	L912211	G915294	ES0144580Y14	1	23	23	4	2060	2100	2140
wind	Spain	Europe	Southern Europe	Entredicho wind farm				36	operating	2003		onshore						Iberdrola Renovables Energia SA		41.324	-0.934	exact		Campo de Belchite		Aragon	https://gem.wiki/Entredicho_wind_farm	L913875	G917229	ES0144580Y14	1	36	36	21	2043	2083	2123
wind	Spain	Europe	Southern Europe	Escalon wind farm				30	operating			onshore						Iberdrola Renovables Energia SA		40.1669	-4.4048	exact		Torrijos	Toledo	Castile-La Mancha	https://gem.wiki/Escalon_wind_farm	L913256	G916495	ES0144580Y14	1	30	30	-99	40	80	120
wind	Spain	Europe	Southern Europe	Escurrillo wind farm				50	operating	2003		onshore						Iberdrola Renovables Energia SA		42.2586	-2.197	exact	Herce			Rioja	https://gem.wiki/Escurrillo_wind_farm	L914925	G918475	ES0144580Y14	1	50		21	2043	2083	2123
wind	Spain	Europe	Southern Europe	Ferreira wind farm	2			50	operating	2006		onshore						Iberdrola Renovables Energia SA		37.2174	-2.9997	exact		Comarca de Guadix	Granada	Andalusia	https://gem.wiki/Ferreira_wind_farm	L914927	G918478	ES0144580Y14	1	50	50	18	2046	2086	2126
wind	Spain	Europe	Southern Europe	Flagship Demonstrator wind farm				10	pre-construction	2025		offshore floating						Iberdrola Renovables Energia SA		27.9929	-15.357	approximate				Las Islas Canarias or País Vasco	https://gem.wiki/Flagship_Demonstrator_wind_farm	L907841	G910513	ES0144580Y14	1	10	10	-1	2065	2105	2145
wind	Spain	Europe	Southern Europe	Forgoselo (Iberdrola) wind farm				24	operating	2000		onshore						Iberdrola Renovables Energia SA		43.4747	-8.039	exact		Ferrol		Galicia	https://gem.wiki/Forgoselo_(Iberdrola)_wind_farm	L912388	G915491	ES0144580Y14	1	24	24	24	2040	2080	2120
wind	Australia	Oceania	Australia and New Zealand	Forsayth wind farm			Queensland Wind	150	announced			onshore						GE Renewable Energy [50%]; Iberdrola Australia [50%]		-18.5856	143.652	approximate	Forsayth			Queensland	https://gem.wiki/Forsayth_wind_farm	L906225	G908470	ES0144580Y14	0.5	150	150	-99	40	80	120
wind	Spain	Europe	Southern Europe	Fuendetodos wind farm	1			46	operating	2003		onshore						Iberdrola Renovables Energia SA		41.345	-0.943	exact		Campo de Belchite		Aragon	https://gem.wiki/Fuendetodos_wind_farm	L914600	G918075	ES0144580Y14	1	94		21	2043	2083	2123
wind	Spain	Europe	Southern Europe	Fuendetodos wind farm	2			48	operating	2003		onshore						Iberdrola Renovables Energia SA		41.379	-0.9601	exact		Campo de Belchite		Aragon	https://gem.wiki/Fuendetodos_wind_farm	L914600	G918173	ES0144580Y14	1	94	94	21	2043	2083	2123
wind	Spain	Europe	Southern Europe	Fuente Salada wind farm			Fuentesalada	46	operating	2011		onshore						Iberdrola Renovables Energia SA		42.3319	-4.0584	exact	Sasamón		Burgos	Castile and León	https://gem.wiki/Fuente_Salada_wind_farm	L914601	G918076	ES0144580Y14	1	46	46	13	2051	2091	2131
wind	Spain	Europe	Southern Europe	Fuenteblanca wind farm				10	operating	2021		onshore						Iberdrola Renovables Energia SA		42.3448	-3.6812	approximate	Valle de Santibáñez		Burgos	Castilla y León	https://gem.wiki/Fuenteblanca_wind_farm	L907855	G910527	ES0144580Y14	1	10	10	3	2061	2101	2141
wind	Spain	Europe	Southern Europe	Garciaz wind farm				50	pre-construction			onshore						Iberdrola Renovables Energia SA		39.4131	-5.6276	approximate	Garciaz		Trujillo	Extremadura	https://gem.wiki/Garciaz_wind_farm	L914936	G918488	ES0144580Y14	1	50	50	-99	40	80	120
wind	Spain	Europe	Southern Europe	Gatún 1F wind farm	2			17	operating	2003		onshore						Iberdrola Renovables Energia SA		42.1514	-2.041	exact				Rioja	https://gem.wiki/Gatún_1F_wind_farm	L910819	G913718	ES0144580Y14	1	17	17	21	2043	2083	2123
wind	Spain	Europe	Southern Europe	Gatún wind farm	1			50	operating	2002		onshore						Iberdrola Renovables Energia SA		42.1514	-2.041	exact				Rioja	https://gem.wiki/Gatún_wind_farm	L914939	G918491	ES0144580Y14	1	50	50	22	2042	2082	2122
wind	Spain	Europe	Southern Europe	Gavilanes wind farm	1			17	operating	2003		onshore						Iberdrola Renovables Energia SA		38.6022	-1.2915	exact	Jumilla	Altiplano	Region of Murcia	Region of Murcia	https://gem.wiki/Gavilanes_wind_farm	L910235	G913720	ES0144580Y14	1	32		21	2043	2083	2123
wind	Spain	Europe	Southern Europe	Gavilanes wind farm	Ampliación			15	operating	2007		onshore						Iberdrola Renovables Energia SA		38.608	-1.2758	exact	Jumilla	Altiplano	Region of Murcia	Region of Murcia	https://gem.wiki/Gavilanes_wind_farm	L910235	G913070	ES0144580Y14	1	32	32	17	2047	2087	2127
wind	Spain	Europe	Southern Europe	Gavina Floating Offshore wind farm				500	pre-construction			offshore floating						Iberdrola		42.185	3.1412	approximate					https://gem.wiki/Gavina_Floating_Offshore_wind_farm	L920744	G925559	ES0144580Y14	1	500	500	-99	40	80	120
wind	Spain	Europe	Southern Europe	Goia Peñote wind farm			Goia-Peñote	40	operating	2005		onshore						Iberdrola Renovables Energia SA		43.4277	-7.6894	exact	Vilalba	Terra Chá		Galicia	https://gem.wiki/Goia_Peñote_wind_farm	L914214	G917621	ES0144580Y14	1	40	40	19	2045	2085	2125
wind	Spain	Europe	Southern Europe	Gomera wind farm				18	operating	2010		onshore						Iberdrola Renovables Energia SA		37.237	-5.1028	approximate	Osuna		Sevilla	Andalucía	https://gem.wiki/Gomera_wind_farm	L911061	G913996	ES0144580Y14	1	18	18	14	2050	2090	2130
wind	Spain	Europe	Southern Europe	Grado wind farm			Grayo Adalon, Grado Montejo	27	operating	2005		onshore						Iberdrola Renovables Energia SA		39.877	-0.0558	exact		Castelló / Castellón		Valencian Community	https://gem.wiki/Grado_wind_farm	L912899	G916077	ES0144580Y14	1	27	27	19	2045	2085	2125
wind	Sweden	Europe	Northern Europe	Gretas Klackar wind farm	1			1800	pre-construction	2028		offshore hard mount						Iberdrola Renovables Energia SA		61.5259	17.697	exact					https://gem.wiki/Gretas_Klackar_wind_farm	L916240	G920167	ES0144580Y14	1	2400		-4	2068	2108	2148
wind	Sweden	Europe	Northern Europe	Gretas Klackar wind farm	2			600	cancelled			offshore mount unknown						Iberdrola Renovables Energia SA		61.3104	17.7758	exact					https://gem.wiki/Gretas_Klackar_wind_farm	L916240	G920043	ES0144580Y14	1	2400	2400	-99	40	80	120
wind	Philippines	Asia	South-eastern Asia	Guimaras Strait Wind Energy Project	1		Guimaras Strait wind farm, Guimaras Strait I Wind Power Project, Guimaras 1 Offshore wind power project	600	pre-construction			offshore hard mount						WindKraft Group; Iberdrola Renewables INC		10.7799	122.85	approximate			Negros		https://gem.wiki/Guimaras_Strait_Wind_Energy_Project	L901299	G927558	ES0144580Y14	0.5	600	600	-99	40	80	120
wind	Taiwan	Asia	Eastern Asia	Guo Feng Offshore wind farm		果豐離岸風力發電計畫, 果豐離岸風電, 果豐離岸風場	Guo Feng, Guo-Feng Offshore	375	announced			offshore hard mount						Iberdrola Renewables INC		23.9555	119.738	approximate				Penghu County	https://gem.wiki/Guo_Feng_Offshore_wind_farm	L916920	G920998	ES0144580Y14	1	375	375	-99	40	80	120
wind	Spain	Europe	Southern Europe	Herrera La Huesa wind farm			La Huesa, Herrera II	32	operating	2021		onshore						Iberdrola Renovables Energia SA		42.3616	-3.9304	approximate	Isar		Burgos	Castilla y León	https://gem.wiki/Herrera_La_Huesa_wind_farm	L913510	G916799	ES0144580Y14	1	32	32	3	2061	2101	2141
wind	Spain	Europe	Southern Europe	Higueruela wind farm				38	operating	1999		onshore						Iberdrola Renovables Energia SA		38.9772	-1.4429	exact			Albacete	Castile-La Mancha	https://gem.wiki/Higueruela_wind_farm	L914067	G917446	ES0144580Y14	1	38	38	25	2039	2079	2119
wind	Spain	Europe	Southern Europe	Hijes wind farm				13	operating	2005		onshore						Iberdrola Renovables Energia SA		41.2789	-3.0434	exact	Hijes		Guadalajara	Castile-La Mancha	https://gem.wiki/Hijes_wind_farm	L909554	G912312	ES0144580Y14	1	13	13	19	2045	2085	2125
wind	Hungary	Europe	Eastern Europe	Hódmezővásárhely wind farm				28	cancelled			onshore						Iberdrola Renovables Energia SA		46.42	20.33	approximate	Hódmezővásárhely	Csongrád	Southern Great Plain		https://gem.wiki/Hódmezővásárhely_wind_farm	L913035	G916242	ES0144580Y14	1	28	28	-99	40	80	120
wind	Spain	Europe	Southern Europe	Hontalbilla wind farm	1			37	operating	2004		onshore						Iberdrola Renovables Energia SA		41.3301	-2.6401	approximate	Adradas		Soria	Castilla y León	https://gem.wiki/Hontalbilla_wind_farm	L913128	G917369	ES0144580Y14	1	66		20	2044	2084	2124
wind	Spain	Europe	Southern Europe	Hontalbilla wind farm	2			29	operating	2004		onshore						Iberdrola Renovables Energia SA		41.3301	-2.5801	approximate	Adradas		Soria	Castilla y León	https://gem.wiki/Hontalbilla_wind_farm	L913128	G916349	ES0144580Y14	1	66	66	20	2044	2084	2124
wind	Spain	Europe	Southern Europe	Hozalia wind farm				31	pre-construction			onshore						Iberdrola Renovables Energia SA		42.5892	-5.5633	approximate	Valle de Losa			Castilla y León	https://gem.wiki/Hozalia_wind_farm	L913433	G916702	ES0144580Y14	1	31	31	-99	40	80	120
wind	Spain	Europe	Southern Europe	Huéneja wind farm	3			50	operating	2006		onshore						Iberdrola Renovables Energia SA		37.1766	-2.9502	exact		Comarca de Guadix	Granada	Andalusia	https://gem.wiki/Huéneja_wind_farm	L914949	G918501	ES0144580Y14	1	50	50	18	2046	2086	2126
wind	Japan	Asia	Eastern Asia	Iberdrola - Gig- Ideol floating wind farm			Iberdrola / GIG / Ideol (TBA) Floating Wind Farm	1400	cancelled			offshore floating						Iberdrola Renewables Japan; BW Ideol; Green Investment Group (GIG)		32.5792	129.041	approximate		Fukue Island	Nagasaki Prefecture		https://gem.wiki/Iberdrola_-_Gig-_Ideol_floating_wind_farm	L916697	G920747	ES0144580Y14	0.333333	1400	1400	-99	40	80	120
wind	Romania	Europe	Eastern Europe	Iberdrola Cogealac wind farm	2		Cogealac Ed	108	operating	2012		onshore						Iberdrola SA		45.9852	24.6859	approximate		Constanta		Dobrega	https://gem.wiki/Iberdrola_Cogealac_wind_farm	L915746	G919463	ES0144580Y14	1	322		12	2052	2092	2132
wind	Romania	Europe	Eastern Europe	Iberdrola Cogealac wind farm	1		Cogealac Ed	214	operating	2013		onshore						Iberdrola SA		45.9852	24.6859	approximate		Constanta		Dobrega	https://gem.wiki/Iberdrola_Cogealac_wind_farm	L915746	G919766	ES0144580Y14	1	322	322	11	2053	2093	2133
wind	Spain	Europe	Southern Europe	Iberdrola Floating Offshore wind farm				300	pre-construction	2026		offshore floating						Iberdrola Renovables Energia SA		27.6501	-15.5601	approximate					https://gem.wiki/Iberdrola_Floating_Offshore_wind_farm	L916092	G919869	ES0144580Y14	1	300	300	-2	2066	2106	2146
wind	Romania	Europe	Eastern Europe	Iberdrola Piatra wind farms	1		Piatra	64	operating	2013		onshore						Iberdrola SA		44.5245	28.3922	approximate		Constanta county		Dobrogea	https://gem.wiki/Iberdrola_Piatra_wind_farms	L915333	G918972	ES0144580Y14	1	64	64	11	2053	2093	2133
wind	Romania	Europe	Eastern Europe	Iberdrola Sacele wind farm	1		Sacele, Iberdrola Sacele	27	operating	2013		onshore						Iberdrola SA		44.5245	28.3922	approximate		Constanta county		Dobrogea	https://gem.wiki/Iberdrola_Sacele_wind_farm	L912957	G916147	ES0144580Y14	1	162		11	2053	2093	2133
wind	Romania	Europe	Eastern Europe	Iberdrola Sacele wind farm	2		Sacele, Iberdrola Sacele	27	operating	2013		onshore						Iberdrola SA		44.5245	28.3922	approximate		Constanta county		Dobrogea	https://gem.wiki/Iberdrola_Sacele_wind_farm	L912957	G916148	ES0144580Y14	1	162		11	2053	2093	2133
wind	Romania	Europe	Eastern Europe	Iberdrola Sacele wind farm	3		Sacele, Iberdrola Sacele	27	operating	2013		onshore						Iberdrola SA		44.5245	28.3922	approximate		Constanta county		Dobrogea	https://gem.wiki/Iberdrola_Sacele_wind_farm	L912957	G916149	ES0144580Y14	1	162		11	2053	2093	2133
wind	Romania	Europe	Eastern Europe	Iberdrola Sacele wind farm	4		Sacele, Iberdrola Sacele	27	operating	2013		onshore						Iberdrola SA		44.5245	28.3922	approximate		Constanta county		Dobrogea	https://gem.wiki/Iberdrola_Sacele_wind_farm	L912957	G916150	ES0144580Y14	1	162		11	2053	2093	2133
wind	Romania	Europe	Eastern Europe	Iberdrola Sacele wind farm	5		Sacele, Iberdrola Sacele	27	operating	2013		onshore						Iberdrola SA		44.5245	28.3922	approximate		Constanta county		Dobrogea	https://gem.wiki/Iberdrola_Sacele_wind_farm	L912957	G916151	ES0144580Y14	1	162		11	2053	2093	2133
wind	Romania	Europe	Eastern Europe	Iberdrola Sacele wind farm	6		Sacele, Iberdrola Sacele	27	operating	2013		onshore						Iberdrola SA		44.5245	28.3922	approximate		Constanta county		Dobrogea	https://gem.wiki/Iberdrola_Sacele_wind_farm	L912957	G916152	ES0144580Y14	1	162	162	11	2053	2093	2133
wind	Japan	Asia	Eastern Asia	Iberdrola/GIG Floating wind farm				700	shelved			offshore floating						Iberdrola Renewables Japan; Green Investment Group (GIG)		32.5993	129.151	approximate			Fukue Island		https://gem.wiki/Iberdrola/GIG_Floating_wind_farm	L901166	G901359	ES0144580Y14	0.5	700	700	-99	40	80	120
wind	Spain	Europe	Southern Europe	Igea wind farm	1		Igea-Cornago Sur	28	operating	2006		onshore						Iberdrola Renovables Energia SA		42.0143	-2.0678	exact				Rioja	https://gem.wiki/Igea_wind_farm	L913039	G916246	ES0144580Y14	1	28	28	18	2046	2086	2126
wind	Spain	Europe	Southern Europe	Iglesias wind farm				94	construction	2023		onshore						Iberdrola Renovables Energia SA; Global Ottowa		42.2976	-3.9892	approximate	Iglesias		Burgos	Castilla y León	https://gem.wiki/Iglesias_wind_farm	L915644	G919342	ES0144580Y14	0.5	94	94	1	2063	2103	2143
wind	Hungary	Europe	Eastern Europe	Ikervár wind farm				34	operating	2011		onshore						Iberdrola Renovables Energia SA		47.2008	16.8689	exact	Ikervár	Vas			https://gem.wiki/Ikervár_wind_farm	L913701	G917032	ES0144580Y14	1	34	34	13	2051	2091	2131
wind	Ireland	Europe	Northern Europe	Inis Ealga wind farm			Inis Ealga Marine Energy Park, Inis Ealga FOW	1000	pre-construction	2030		offshore floating						DP Energy; Iberdrola SA		51.601	-7.5801	approximate					https://gem.wiki/Inis_Ealga_wind_farm	L916298	G920111	ES0144580Y14	0.5	1000	1000	-6	2070	2110	2150
wind	Spain	Europe	Southern Europe	Isabela wind farm				48	operating	2001		onshore						Iberdrola Renovables Energia SA		38.7111	-2.1758	exact			Albacete	Castile-La Mancha	https://gem.wiki/Isabela_wind_farm	L914695	G918186	ES0144580Y14	1	48	48	23	2041	2081	2121
wind	Taiwan	Asia	Eastern Asia	Ju Dao Offshore wind farm		菊島, 菊島離岸風電	Kikushima, Ju Dao	2400	cancelled			offshore floating						Iberdrola Renewables INC		23.8055	119.598	approximate				Penghu County	https://gem.wiki/Ju_Dao_Offshore_wind_farm	L916933	G921011	ES0144580Y14	1	2400	2400	-99	40	80	120
wind	Hungary	Europe	Eastern Europe	Kisigmand wind farm			Nagyigmand	50	operating	2010		onshore						Iberdrola Renovables Energia SA		47.6747	18.0711	exact	Kisigmánd	Komárom-Esztergom			https://gem.wiki/Kisigmand_wind_farm	L914953	G918505	ES0144580Y14	1	50		14	2050	2090	2130
wind	Poland	Europe	Eastern Europe	Korytnica wind farm	2		Korytnica North wind farm	50	operating	2022		onshore						Iberdrola SA		52.2254	21.0284	approximate				Mazowieckie voivodeship	https://gem.wiki/Korytnica_wind_farm	L914955	G918507	ES0144580Y14	1	50	50	2	2062	2102	2142
wind	Spain	Europe	Southern Europe	La Casetona wind farm				28	operating	2019		onshore						Iberdrola Renovables Energia SA		42.1824	-4.1521	approximate	Vallejera		Burgos	Castilla y León	https://gem.wiki/La_Casetona_wind_farm	L913043	G916250	ES0144580Y14	1	28	28	5	2059	2099	2139
wind	Spain	Europe	Southern Europe	La Cotera wind farm				18	operating	2008		onshore						Iberdrola Renovables Energia SA		43.3598	-4.3493	exact	Valdáliga	Costa Occidental		Cantabria	https://gem.wiki/La_Cotera_wind_farm	L911120	G914063	ES0144580Y14	1	18	18	16	2048	2088	2128
wind	Spain	Europe	Southern Europe	La Cruz Del Marques wind farm				44	cancelled			onshore						Iberdrola Renovables Energia SA		43.0486	-3.8668	approximate	Luena	Puerto de Escudo	Puerto del Escudo	Cantabria	https://gem.wiki/La_Cruz_Del_Marques_wind_farm	L914470	G917927	ES0144580Y14	1	44	44	-99	40	80	120
wind	Spain	Europe	Southern Europe	La Cuerda wind farm			Cuerda	31	operating	2000		onshore						Iberdrola Renovables Energia SA		38.7972	-1.4727	exact			Albacete	Castile-La Mancha	https://gem.wiki/La_Cuerda_wind_farm	L913439	G916710	ES0144580Y14	1	31	31	24	2040	2080	2120
wind	Spain	Europe	Southern Europe	La Magdalena wind farm				24	operating	2004		onshore						Iberdrola Renovables Energia SA		43.0442	-3.8341	exact			Burgos	Castile and León	https://gem.wiki/La_Magdalena_wind_farm	L912437	G915546	ES0144580Y14	1	24	24	20	2044	2084	2124
wind	Spain	Europe	Southern Europe	La Matanela wind farm				41	cancelled			onshore						Iberdrola Renovables Energia SA		43.0486	-3.8668	approximate	Luena	Puerto de Escudo	Puerto del Escudo	Cantabria	https://gem.wiki/La_Matanela_wind_farm	L914295	G917719	ES0144580Y14	1	41	41	-99	40	80	120
wind	Spain	Europe	Southern Europe	La Plana wind farm	3			15	operating	1996		onshore							Iberdrola Renovables Energia SA	41.536	-1.079	exact		Valdejalón		Aragon	https://gem.wiki/La_Plana_wind_farm	L910280	G913120	ES0144580Y14	1	32		28	2036	2076	2116
wind	Spain	Europe	Southern Europe	La Plana wind farm	2			17	operating	1999		onshore						Iberdrola Renovables Energia SA		41.538	-1.104	exact		Valdejalón		Aragon	https://gem.wiki/La_Plana_wind_farm	L910280	G913753	ES0144580Y14	1	32	32	25	2039	2079	2119
wind	Spain	Europe	Southern Europe	La Retuerta wind farm			Retuerta Fase B	38	operating	2009		onshore						Iberdrola Renovables Energia SA		37.5076	-7.2704	exact	El Almendro	El Andévalo	Huelva	Andalusia	https://gem.wiki/La_Retuerta_wind_farm	L914072	G917453	ES0144580Y14	1	38	38	15	2049	2089	2129
wind	Spain	Europe	Southern Europe	La Tallisca wind farm				40	operating	2009		onshore						Iberdrola Renovables Energia SA		37.5069	-7.2701	approximate	El Almendro		Huelva	Andalucía	https://gem.wiki/La_Tallisca_wind_farm	L914226	G917636	ES0144580Y14	1	40	40	15	2049	2089	2129
wind	Spain	Europe	Southern Europe	La Torrecilla wind farm	1			16	operating	2008		onshore						Iberdrola Renovables Energia SA		40.793	-0.987	exact	Pancrudo	Comunidad de Teruel		Aragon	https://gem.wiki/La_Torrecilla_wind_farm	L910570	G913445	ES0144580Y14	1	38		16	2048	2088	2128
wind	Spain	Europe	Southern Europe	La Torrecilla wind farm	2			22	operating	2012		onshore						Iberdrola Renovables Energia SA		40.7938	-0.9796	exact	Pancrudo	Comunidad de Teruel		Aragon	https://gem.wiki/La_Torrecilla_wind_farm	L910570	G915142	ES0144580Y14	1	38	38	12	2052	2092	2132
wind	Mexico	Americas	Latin America and the Caribbean	La Ventosa wind farm	1	Parque Eólico La Ventosa		49	operating	2009		onshore						Iberdrola Renovables Energia SA		16.4355	-95.0174	approximate	Juchitan de Zaragoza			Oaxaca	https://gem.wiki/La_Ventosa_wind_farm	L905344	G907114	ES0144580Y14	1	102		15	2049	2089	2129
wind	Mexico	Americas	Latin America and the Caribbean	La Ventosa wind farm	2	Parque Eólico La Ventosa		31	operating	2009		onshore						Iberdrola Renovables Energia SA		16.4355	-95.0174	approximate	Juchitan de Zaragoza			Oaxaca	https://gem.wiki/La_Ventosa_wind_farm	L905344	G907115	ES0144580Y14	1	102		15	2049	2089	2129
wind	Mexico	Americas	Latin America and the Caribbean	La Ventosa wind farm	3	Parque Eólico La Ventosa		22	operating	2014		onshore						Iberdrola Renovables Energia SA		16.4355	-95.0174	approximate	Juchitan de Zaragoza			Oaxaca	https://gem.wiki/La_Ventosa_wind_farm	L905344	G907113	ES0144580Y14	1	102	102	10	2054	2094	2134
wind	Spain	Europe	Southern Europe	Labradas Fusionado wind farm				37	operating	2002		onshore						Iberdrola Renovables Energia SA		42.1109	-5.8778	exact			Zamora	Castile and León	https://gem.wiki/Labradas_Fusionado_wind_farm	L913999	G917373	ES0144580Y14	1	37	37	22	2042	2082	2122
wind	Spain	Europe	Southern Europe	Larriba wind farm	2a		Larriba-Hornillos	32	operating	2005		onshore						Iberdrola Renovables Energia SA		42.1935	-2.3878	exact	Ajamil			Rioja	https://gem.wiki/Larriba_wind_farm	L913524	G916814	ES0144580Y14	1	32	32	19	2045	2085	2125
wind	Spain	Europe	Southern Europe	Las Aulagas wind farm				13	pre-construction			onshore						Iberdrola Renovables Energia SA		37.1392	-3.6705	approximate	Granadilla de Abona	Tenerife	Santa Cruz de las Palmas	Las Islas Canarias	https://gem.wiki/Las_Aulagas_wind_farm	L909575	G912336	ES0144580Y14	1	13	13	-99	40	80	120
wind	Spain	Europe	Southern Europe	Las Cabezas wind farm				17	operating	2009		onshore						Iberdrola Renovables Energia SA		37.6143	-7.2488	exact		El Andévalo	Huelva	Andalusia	https://gem.wiki/Las_Cabezas_wind_farm	L910846	G913754	ES0144580Y14	1	17	17	15	2049	2089	2129
wind	Spain	Europe	Southern Europe	Las Matas wind farm				30	cancelled			onshore						Iberdrola Renovables Energia SA		43.3983	-3.7389	approximate	Campoo de Enmedio	Puerto de Escudo		Cantabria	https://gem.wiki/Las_Matas_wind_farm	L913305	G916553	ES0144580Y14	1	30	30	-99	40	80	120
wind	Spain	Europe	Southern Europe	Las Viñas wind farm				38	operating	2010		onshore						Iberdrola Renovables Energia SA		42.4735	-3.7437	exact	Valle de Santibáñez		Burgos	Castile and León	https://gem.wiki/Las_Viñas_wind_farm	L914074	G917456	ES0144580Y14	1	38	38	14	2050	2090	2130
wind	Spain	Europe	Southern Europe	Layna wind farm				50	operating	2012		onshore						Iberdrola Renovables Energia SA		41.1014	-2.2685	exact			Soria	Castile and León	https://gem.wiki/Layna_wind_farm	L914969	G918525	ES0144580Y14	1	50	50	12	2052	2092	2132
wind	United States	Americas	Northern America	Leipsic Wind	1			150	cancelled			onshore						Iberdrola Renewables INC		41.1085	-83.9724	approximate		Putnam County		Ohio	https://gem.wiki/Leipsic_Wind	L917225	G921371	ES0144580Y14	1	250		-99	40	80	120
wind	United States	Americas	Northern America	Leipsic Wind	2			100	cancelled			onshore						Iberdrola Renewables INC		41.1085	-83.9724	approximate		Putnam County		Ohio	https://gem.wiki/Leipsic_Wind	L917225	G921372	ES0144580Y14	1	250	250	-99	40	80	120
wind	Spain	Europe	Southern Europe	Llorengoz wind farm				44	announced			onshore						Iberdrola Renovables Energia SA		42.3448	-3.6812	approximate	Valle de Losa		Burgos	Castilla y León	https://gem.wiki/Llorengoz_wind_farm	L914477	G917934	ES0144580Y14	1	44	44	-99	40	80	120
wind	Spain	Europe	Southern Europe	Los Alburejos wind farm				10	operating	2008		onshore						Iberdrola Renovables Energia SA		36.4594	-5.8716	exact		La Janda	Cádiz	Andalusia	https://gem.wiki/Los_Alburejos_wind_farm	L908006	G910691	ES0144580Y14	1	10	10	16	2048	2088	2128
wind	Spain	Europe	Southern Europe	Los Bolaños wind farm				24	operating	2008		onshore						Iberdrola Renovables Energia SA		36.6801	-6.1301	approximate	Jerez de la Frontera		Cádiz	Andalucía	https://gem.wiki/Los_Bolaños_wind_farm	L912454	G915564	ES0144580Y14	1	24	24	16	2048	2088	2128
wind	Spain	Europe	Southern Europe	Los Campillos wind farm				34	operating	2006		onshore						Iberdrola Renovables Energia SA		41.3865	-2.5706	approximate	Almazán		Soria	Castilla y León	https://gem.wiki/Los_Campillos_wind_farm	L913709	G917040	ES0144580Y14	1	34	34	18	2046	2086	2126
wind	Spain	Europe	Southern Europe	Los Collados wind farm				11	operating	2011		onshore						Iberdrola Renovables Energia SA		42.3364	-4.1084	exact			Burgos	Castile and León	https://gem.wiki/Los_Collados_wind_farm	L908472	G911173	ES0144580Y14	1	11	11	13	2051	2091	2131
wind	Spain	Europe	Southern Europe	Los Corrales wind farm				32	cancelled			onshore						Iberdrola Renovables Energia SA		40.6188	-0.0998	approximate	Morella		Castellón	Valencia	https://gem.wiki/Los_Corrales_wind_farm	L913527	G916818	ES0144580Y14	1	32	32	-99	40	80	120
wind	Spain	Europe	Southern Europe	Los Liríos wind farm				48	operating	2010		onshore						Iberdrola Renovables Energia SA		37.3736	-7.3771	exact		Costa Occidental	Huelva	Andalusia	https://gem.wiki/Los_Liríos_wind_farm	L914713	G918204	ES0144580Y14	1	48	48	14	2050	2090	2130
wind	Mexico	Americas	Latin America and the Caribbean	Los Vergeles wind farm		Parque Eólico Los Vergeles		161	cancelled			onshore						Iberdrola Renovables Energia SA; Siemens Gamesa Renewable Energy SA		25.1514	-97.9207	approximate	Los Vergeles			Tamaulipas	https://gem.wiki/Los_Vergeles_wind_farm	L905322	G907052	ES0144580Y14	0.5	161	161	-99	40	80	120
wind	Spain	Europe	Southern Europe	Luzón Norte wind farm				38	operating	2006		onshore						Iberdrola Renovables Energia SA		41.0513	-2.2704	exact	Luzón		Guadalajara	Castile-La Mancha	https://gem.wiki/Luzón_Norte_wind_farm	L914078	G917462	ES0144580Y14	1	38	38	18	2046	2086	2126
wind	United Kingdom	Europe	Northern Europe	MachairWind offshore wind farm			Plan Option Area W1, Machair Wind (W1)	2000	announced			offshore hard mount						Iberdrola; ScottishPower Renewables (SPR)		56.0141	-6.9699	approximate					https://gem.wiki/MachairWind_offshore_wind_farm	L921169	G926086	ES0144580Y14	0.5	2000	2000	-99	40	80	120
wind	Spain	Europe	Southern Europe	Madroñera wind farm				50	cancelled			onshore						Iberdrola Renovables Energia SA		39.4254	-5.7572	approximate	Madroñera		Trujillo	Extremadura	https://gem.wiki/Madroñera_wind_farm	L914983	G918541	ES0144580Y14	1	50		-99	40	80	120
wind	Spain	Europe	Southern Europe	Majal Alto wind farm				50	operating	2009		onshore						Iberdrola Renovables Energia SA		37.6114	-7.2458	approximate	Puebla de Guzmán		Huelva	Andalucía	https://gem.wiki/Majal_Alto_wind_farm	L914986	G918544	ES0144580Y14	1	50		15	2049	2089	2129
wind	Spain	Europe	Southern Europe	Malefatón wind farm				50	operating	2000		onshore						Iberdrola Renovables Energia SA		38.9601	-1.4401	approximate	Higueruela		Albacete	Castilla La Mancha	https://gem.wiki/Malefatón_wind_farm	L914988	G918547	ES0144580Y14	1	50	50	24	2040	2080	2120
wind	Spain	Europe	Southern Europe	Maranchón Sur wind farm				12	operating	2006		onshore						Iberdrola Renovables Energia SA		41.0299	-2.1964	exact	Maranchón		Guadalajara	Castile-La Mancha	https://gem.wiki/Maranchón_Sur_wind_farm	L909078	G911812	ES0144580Y14	1	12	12	18	2046	2086	2126
wind	Spain	Europe	Southern Europe	Maranchón wind farm	1			18	operating	2005		onshore						Iberdrola Renovables Energia SA		41.0475	-2.2048	exact	Maranchón		Guadalajara	Castile-La Mancha	https://gem.wiki/Maranchón_wind_farm	L911155	G914100	ES0144580Y14	1	66		19	2045	2085	2125
wind	Spain	Europe	Southern Europe	Maranchón wind farm	4			48	operating	2005		onshore						Iberdrola Renovables Energia SA		41.0501	-2.2001	approximate	Maranchón		Guadalajara	Castilla La Mancha	https://gem.wiki/Maranchón_wind_farm	L911155	G918206	ES0144580Y14	1	66	66	19	2045	2085	2125
wind	Spain	Europe	Southern Europe	Martín De La Jara wind farm				36	operating	2022		onshore						Iberdrola Renovables Energia SA		37.1078	-4.9636	approximate	Martín de la Jara		Sevilla	Andalucía	https://gem.wiki/Martín_De_La_Jara_wind_farm	L913912	G917270	ES0144580Y14	1	36	36	2	2062	2102	2142
wind	Spain	Europe	Southern Europe	Masgalán-Campo De Coco wind farm				50	operating	2001		onshore						Iberdrola Renovables Energia SA		42.601	-8.267	approximate	Forcarei		Pontevedra	Galicia	https://gem.wiki/Masgalán-Campo_De_Coco_wind_farm	L914992	G918551	ES0144580Y14	1	50		23	2041	2081	2121
wind	Spain	Europe	Southern Europe	Maza wind farm				50	operating	2005		onshore						Iberdrola Renovables Energia SA		39.6358	-1.7449	exact			Cuenca	Castile-La Mancha	https://gem.wiki/Maza_wind_farm	L914993	G918552	ES0144580Y14	1	50	50	19	2045	2085	2125
wind	Spain	Europe	Southern Europe	Meda Galicia wind farm	1			12	cancelled			onshore						Iberdrola Renovables Energia SA		42.2753	-7.5027	approximate	Montederramo		Ourense	Galicia	https://gem.wiki/Meda_Galicia_wind_farm	L909090	G911824	ES0144580Y14	1	26		-99	40	80	120
wind	Spain	Europe	Southern Europe	Meda Galicia wind farm	2		Ampliación Meda	14	cancelled			onshore						Iberdrola Renovables Energia SA		42.3021	-7.0008	approximate	Meda		Ourense	Galicia	https://gem.wiki/Meda_Galicia_wind_farm	L909090	G912748	ES0144580Y14	1	26	26	-99	40	80	120
wind	Brazil	Americas	Latin America and the Caribbean	Mel 2 wind farm	1	Parque Eólico Mel 2		20	operating	2013		onshore						Iberdrola Neoenergia		-4.9467	-36.9642	exact	Areia Branca		Região Geográfica Intermediária de Mossoró	Rio Grande do Norte	https://gem.wiki/Mel_2_wind_farm	L905337	G907090	ES0144580Y14	1	20	20	11	2053	2093	2133
wind	Greece	Europe	Southern Europe	Mikronoros wind farm		Μικρονορος	Makrynoros	33.6	operating	2022		onshore						Iberdrola		41.3312	25.8456	exact		Rodopi Regional Unit	Eastern Macedonia and Thrace	Macedonia and Thrace	https://gem.wiki/Mikronoros_wind_farm	L913667	G916992	ES0144580Y14	1	33.6	33.6	2	2062	2102	2142
wind	Spain	Europe	Southern Europe	Moixacre wind farm				50	pre-construction			onshore						Iberdrola Renovables Energia SA		40.6188	-0.0998	approximate	Morella		Castellón	Valencia	https://gem.wiki/Moixacre_wind_farm	L914999	G918561	ES0144580Y14	1	50		-99	40	80	120
wind	Spain	Europe	Southern Europe	Molar De Molinar wind farm				50	operating	2000		onshore						Iberdrola Renovables Energia SA		38.6938	-2.0506	exact			Albacete	Castile-La Mancha	https://gem.wiki/Molar_De_Molinar_wind_farm	L915001	G918563	ES0144580Y14	1	50	50	24	2040	2080	2120
wind	Spain	Europe	Southern Europe	Monte Carrio wind farm				31	operating	2002		onshore						Iberdrola Renovables Energia SA		42.6609	-8.1129	exact		O Deza		Galicia	https://gem.wiki/Monte_Carrio_wind_farm	L913443	G916715	ES0144580Y14	1	31	31	22	2042	2082	2122
wind	Spain	Europe	Southern Europe	Monte Molón wind farm				30	operating	2002		onshore						Iberdrola Renovables Energia SA		39.7046	-1.3809	exact			Cuenca	Castile-La Mancha	https://gem.wiki/Monte_Molón_wind_farm	L913331	G916586	ES0144580Y14	1	30	30	22	2042	2082	2122
wind	Spain	Europe	Southern Europe	Monte Treito wind farm				39	operating	2001		onshore						Iberdrola Renovables Energia SA		42.7501	-8.7801	exact		Noia		Galicia	https://gem.wiki/Monte_Treito_wind_farm	L914141	G917535	ES0144580Y14	1	39	39	23	2041	2081	2121
wind	Spain	Europe	Southern Europe	Morón De Almazán wind farm				50	operating	2006		onshore						Iberdrola Renovables Energia SA		41.3892	-2.4272	exact			Soria	Castile and León	https://gem.wiki/Morón_De_Almazán_wind_farm	L915005	G918570	ES0144580Y14	1	50	50	18	2046	2086	2126
wind	Spain	Europe	Southern Europe	Morrablancar wind farm				13	operating	2003		onshore						Iberdrola Renovables Energia SA		38.9746	-1.5841	exact			Albacete	Castile-La Mancha	https://gem.wiki/Morrablancar_wind_farm	L909587	G912353	ES0144580Y14	1	13	13	21	2043	2083	2123
wind	Australia	Oceania	Australia and New Zealand	Mount James wind farm			Mt James	1000	pre-construction	2038		onshore						Iberdrola		-19.964	144.203	approximate	Hughenden			Queensland	https://gem.wiki/Mount_James_wind_farm	L906119	G908332	ES0144580Y14	1	1000	1000	-14	2078	2118	2158
wind	Spain	Europe	Southern Europe	Muela (Iberdrola) wind farm	1		La Muela	50	operating	2004		onshore						Iberdrola Renovables Energia SA		39.458	-2.2525	exact			Cuenca	Castile-La Mancha	https://gem.wiki/Muela_(Iberdrola)_wind_farm	L915006	G918571	ES0144580Y14	1	50		20	2044	2084	2124
wind	Spain	Europe	Southern Europe	Muela Cubillo wind farm				50	operating	2008		onshore						Iberdrola Renovables Energia SA		40.0247	-1.471	exact			Cuenca	Castile-La Mancha	https://gem.wiki/Muela_Cubillo_wind_farm	L915007	G918572	ES0144580Y14	1	50	50	16	2048	2088	2128
wind	Spain	Europe	Southern Europe	Muela De Tortosilla wind farm			Muela Torto	37	operating	2000		onshore						Iberdrola Renovables Energia SA		38.9667	-1.2167	exact	Alpera		Albacete	Castile-La Mancha	https://gem.wiki/Muela_De_Tortosilla_wind_farm	L914002	G917376	ES0144580Y14	1	37	37	24	2040	2080	2120
wind	Spain	Europe	Southern Europe	Munilla wind farm	Ampliación			10	operating			onshore						Iberdrola Renovables Energia SA		42.2064	-2.3397	exact	Munilla			Rioja	https://gem.wiki/Munilla_wind_farm	L908046	G910733	ES0144580Y14	1	10	10	-99	40	80	120
wind	Spain	Europe	Southern Europe	Munilla-La Santa wind farm			Munilla-Lasanta	36	operating	2004		onshore						Iberdrola Renovables Energia SA		42.2064	-2.3397	exact	Munilla			Rioja	https://gem.wiki/Munilla-La_Santa_wind_farm	L913917	G917275	ES0144580Y14	1	36	36	20	2044	2084	2124
wind	Spain	Europe	Southern Europe	Muras wind farm	1			24	operating	2000		onshore						Iberdrola Renovables Energia SA		43.5378	-7.7299	exact		Terra Chá		Galicia	https://gem.wiki/Muras_wind_farm	L912479	G915592	ES0144580Y14	1	48		24	2040	2080	2120
wind	Spain	Europe	Southern Europe	Muras wind farm	2			24	operating	2000		onshore						Iberdrola Renovables Energia SA		43.4668	-7.7238	exact		Terra Chá		Galicia	https://gem.wiki/Muras_wind_farm	L912479	G915593	ES0144580Y14	1	48	48	24	2040	2080	2120
wind	Spain	Europe	Southern Europe	Nacimiento wind farm				24	operating	2008		onshore						Iberdrola Renovables Energia SA		37.1253	-2.6648	exact			Almeria	Andalusia	https://gem.wiki/Nacimiento_wind_farm	L912481	G915595	ES0144580Y14	1	24	24	16	2048	2088	2128
wind	Brazil	Americas	Latin America and the Caribbean	Oitis wind farm	1	Complexo Eólico Oitis		50	operating	2023		onshore						Iberdrola Neoenergia		-9.0044	-41.7177	exact	Dom Inocêncio		Região Geográfica Intermediária de São Raimundo Nonato	Piauí	https://gem.wiki/Oitis_wind_farm	L905338	G907091	ES0144580Y14	1	572		1	2063	2103	2143
wind	Brazil	Americas	Latin America and the Caribbean	Oitis wind farm	2	Complexo Eólico Oitis		28	operating	2023		onshore						Iberdrola Neoenergia		-9.0051	-41.7274	exact	Dom Inocêncio		Região Geográfica Intermediária de São Raimundo Nonato	Piauí	https://gem.wiki/Oitis_wind_farm	L905338	G907092	ES0144580Y14	1	572		1	2063	2103	2143
wind	Brazil	Americas	Latin America and the Caribbean	Oitis wind farm	3	Complexo Eólico Oitis		50	operating	2023		onshore						Iberdrola Neoenergia		-9.0062	-41.7485	exact	Dom Inocêncio		Região Geográfica Intermediária de São Raimundo Nonato	Piauí	https://gem.wiki/Oitis_wind_farm	L905338	G907093	ES0144580Y14	1	572		1	2063	2103	2143
wind	Brazil	Americas	Latin America and the Caribbean	Oitis wind farm	4	Complexo Eólico Oitis		50	operating	2023		onshore						Iberdrola Neoenergia		-9.0224	-41.7501	exact	Dom Inocêncio		Região Geográfica Intermediária de São Raimundo Nonato	Piauí	https://gem.wiki/Oitis_wind_farm	L905338	G907094	ES0144580Y14	1	572		1	2063	2103	2143
wind	Brazil	Americas	Latin America and the Caribbean	Oitis wind farm	5	Complexo Eólico Oitis		50	operating	2023		onshore						Iberdrola Neoenergia		-9.0397	-41.7527	exact	Dom Inocêncio	Região Administrativa Integrada de Desenvolvimento do Polo Petrolina e Juazeiro	Região Geográfica Intermediária de São Raimundo Nonato	Piauí	https://gem.wiki/Oitis_wind_farm	L905338	G907095	ES0144580Y14	1	572		1	2063	2103	2143
wind	Brazil	Americas	Latin America and the Caribbean	Oitis wind farm	6	Complexo Eólico Oitis		50	operating	2023		onshore						Iberdrola Neoenergia		-9.0526	-41.7364	exact	Dom Inocêncio		Região Geográfica Intermediária de São Raimundo Nonato	Piauí	https://gem.wiki/Oitis_wind_farm	L905338	G907096	ES0144580Y14	1	572		1	2063	2103	2143
wind	Brazil	Americas	Latin America and the Caribbean	Oitis wind farm	7	Complexo Eólico Oitis		50	operating	2023		onshore						Iberdrola Neoenergia		-9.0712	-41.735	exact	Dom Inocêncio	Região Administrativa Integrada de Desenvolvimento do Polo Petrolina e Juazeiro	Região Geográfica Intermediária de São Raimundo Nonato	Piauí	https://gem.wiki/Oitis_wind_farm	L905338	G907097	ES0144580Y14	1	572		1	2063	2103	2143
wind	Brazil	Americas	Latin America and the Caribbean	Oitis wind farm	8	Complexo Eólico Oitis		50	operating	2023		onshore						Iberdrola Neoenergia		-9.0982	-41.7609	exact	Dom Inocêncio		Região Geográfica Intermediária de São Raimundo Nonato	Piauí	https://gem.wiki/Oitis_wind_farm	L905338	G907098	ES0144580Y14	1	572		1	2063	2103	2143
wind	Brazil	Americas	Latin America and the Caribbean	Oitis wind farm	9	Complexo Eólico Oitis		50	operating	2023		onshore						Iberdrola Neoenergia		-9.0536	-41.7733	exact	Dom Inocêncio		Região Geográfica Intermediária de São Raimundo Nonato	Piauí	https://gem.wiki/Oitis_wind_farm	L905338	G907099	ES0144580Y14	1	572		1	2063	2103	2143
wind	Brazil	Americas	Latin America and the Caribbean	Oitis wind farm	10	Complexo Eólico Oitis		50	operating	2023		onshore						Iberdrola Neoenergia		-9.0506	-41.7728	exact	Dom Inocêncio		Região Geográfica Intermediária de São Raimundo Nonato	Piauí	https://gem.wiki/Oitis_wind_farm	L905338	G907100	ES0144580Y14	1	572		1	2063	2103	2143
wind	Brazil	Americas	Latin America and the Caribbean	Oitis wind farm	21	Complexo Eólico Oitis		44	operating	2023		onshore						Iberdrola Neoenergia		-9.0537	-41.7071	exact	Casa Nova	Região Administrativa Integrada de Desenvolvimento do Polo Petrolina e Juazeiro	Região Geográfica Intermediária de Juazeiro	Bahia	https://gem.wiki/Oitis_wind_farm	L905338	G907101	ES0144580Y14	1	572		1	2063	2103	2143
wind	Brazil	Americas	Latin America and the Caribbean	Oitis wind farm	22	Complexo Eólico Oitis		50	operating	2023		onshore						Iberdrola Neoenergia		-9.0738	-41.7148	exact	Casa Nova	Região Administrativa Integrada de Desenvolvimento do Polo Petrolina e Juazeiro	Região Geográfica Intermediária de São Raimundo Nonato	Piauí	https://gem.wiki/Oitis_wind_farm	L905338	G907102	ES0144580Y14	1	572	572	1	2063	2103	2143
wind	Spain	Europe	Southern Europe	Oiz wind farm			Oiz Bizkaia	26	operating	2004		onshore						Iberdrola Renovables Energia SA		43.2156	-2.5778	exact				Autonomous Community of the Basque Country	https://gem.wiki/Oiz_wind_farm	L912813	G915977	ES0144580Y14	1	26	26	20	2044	2084	2124
wind	Spain	Europe	Southern Europe	Orbaneja wind farm			Herrera II (Orbaneja)	18	operating	2021		onshore						Iberdrola Renovables Energia SA		42.3616	-3.9304	approximate	Isar		Burgos	Castilla y León	https://gem.wiki/Orbaneja_wind_farm	L911180	G914129	ES0144580Y14	1	18	18	3	2061	2101	2141
wind	Spain	Europe	Southern Europe	Panondres wind farm				21	operating	2021		onshore						Iberdrola Renovables Energia SA		43.4485	-6.7051	approximate	Villayón			Asturias	https://gem.wiki/Panondres_wind_farm	L911917	G914955	ES0144580Y14	1	21	21	3	2061	2101	2141
wind	Spain	Europe	Southern Europe	Páramo Vega wind farm			Paramo de Vega	18	operating	2009		onshore						Iberdrola Renovables Energia SA		42.5166	-3.7873	exact			Burgos	Castile and León	https://gem.wiki/Páramo_Vega_wind_farm	L911188	G914137	ES0144580Y14	1	18	18	15	2049	2089	2129
wind	Mexico	Americas	Latin America and the Caribbean	Parques Ecologicos De Mexico wind farm		Parques Ecológicos de México Parque Eólico	PEM	80	operating	2008		onshore						Iberdrola Renovables Energia SA		16.4329	-95.0181	approximate	Juchitan de Zaragoza			Oaxaca	https://gem.wiki/Parques_Ecologicos_De_Mexico_wind_farm	L905345	G907116	ES0144580Y14	1	80	80	16	2048	2088	2128
wind	France	Europe	Western Europe	Pays De Boussac wind farm			Bussière-Saint-Georges	17	operating	2012		onshore						Iberdrola SA		46.4183	2.1723	exact		Creuse		New Aquitaine	https://gem.wiki/Pays_De_Boussac_wind_farm	L910873	G913784	ES0144580Y14	1	17	17	12	2052	2092	2132
wind	Spain	Europe	Southern Europe	Pedregal wind farm	1		Pedregal Tremuzo	31	operating	2003		onshore						Iberdrola Renovables Energia SA		42.7762	-9.0603	exact		Muros		Galicia	https://gem.wiki/Pedregal_wind_farm	L909970	G912775	ES0144580Y14	1	45		21	2043	2083	2123
wind	Spain	Europe	Southern Europe	Pedregal wind farm	2		Pedregal Tremuzo	14	operating	2003		onshore						Iberdrola Renovables Energia SA		42.7762	-9.0603	exact		Muros		Galicia	https://gem.wiki/Pedregal_wind_farm	L909970	G916721	ES0144580Y14	1	45	45	21	2043	2083	2123
wind	Spain	Europe	Southern Europe	Pena Da Cruz wind farm	1			13	operating	2002		onshore						Iberdrola Renovables Energia SA		42.2501	-7.3833	exact	Montederramo		Ourense	Galicia	https://gem.wiki/Pena_Da_Cruz_wind_farm	L908093	G910781	ES0144580Y14	1	23		22	2042	2082	2122
wind	Spain	Europe	Southern Europe	Pena Da Cruz wind farm	Amplicación			10	operating	2004		onshore						Iberdrola Renovables Energia SA		42.2601	-7.3801	approximate	Chandrexa de Queixa	Terra de Trives		Galicia	https://gem.wiki/Pena_Da_Cruz_wind_farm	L908093	G912368	ES0144580Y14	1	23	23	20	2044	2084	2124
wind	Spain	Europe	Southern Europe	Peñaflor wind farm	3			45	operating	2012		onshore						Iberdrola Renovables Energia SA		41.7814	-4.9428	approximate	Peñaflor de Hornija		Valladolid	Castilla y León	https://gem.wiki/Peñaflor_wind_farm	L914559	G918026	ES0144580Y14	1	90		12	2052	2092	2132
wind	Spain	Europe	Southern Europe	Peñaflor wind farm	4			45	operating	2012		onshore						Iberdrola Renovables Energia SA		41.7113	-4.9832	approximate	Peñaflor de Hornija		Valladolid	Castilla y León	https://gem.wiki/Peñaflor_wind_farm	L914559	G918027	ES0144580Y14	1	90	90	12	2052	2092	2132
wind	Spain	Europe	Southern Europe	Peñas Gordas wind farm				44	cancelled			onshore						Iberdrola Renovables Energia SA		43.3983	-3.7389	approximate	Luena	Puerto de Escudo		Cantabria	https://gem.wiki/Peñas_Gordas_wind_farm	L914478	G917936	ES0144580Y14	1	44	44	-99	40	80	120
wind	Spain	Europe	Southern Europe	Pico Collalbas wind farm				30	operating			onshore						Iberdrola Renovables Energia SA		39.8481	-1.4965	exact	Henarejos		Cuenca	Castile-La Mancha	https://gem.wiki/Pico_Collalbas_wind_farm	L913345	G916604	ES0144580Y14	1	30	30	-99	40	80	120
wind	Spain	Europe	Southern Europe	Pico Cuiredo wind farm				32	cancelled			onshore						Iberdrola Renovables Energia SA		43.4102	-6.8352	approximate	Boal			Asturias	https://gem.wiki/Pico_Cuiredo_wind_farm	L913539	G916835	ES0144580Y14	1	32	32	-99	40	80	120
wind	Spain	Europe	Southern Europe	Pico Del Fraile wind farm				44	announced			onshore						Iberdrola Renovables Energia SA		42.3448	-3.6812	approximate	Valle de Losa		Burgos	Castilla y León	https://gem.wiki/Pico_Del_Fraile_wind_farm	L914479	G917937	ES0144580Y14	1	44	44	-99	40	80	120
wind	Mexico	Americas	Latin America and the Caribbean	Pier wind farm	2	Parque Eólico Pier		66	operating	2015		onshore						Iberdrola Renovables Energia SA		18.8721	-97.3957	exact	Esperanza			Puebla	https://gem.wiki/Pier_wind_farm	L905346	G907649	ES0144580Y14	1	286		9	2055	2095	2135
wind	Mexico	Americas	Latin America and the Caribbean	Pier wind farm	4	Parque Eólico Pier		220	operating	2020		onshore						Iberdrola Renovables Energia SA		18.8606	-97.376	approximate	Esperanza			Puebla	https://gem.wiki/Pier_wind_farm	L905346	G907117	ES0144580Y14	1	286	286	4	2060	2100	2140
wind	Australia	Oceania	Australia and New Zealand	Port Augusta Renewable Energy Park wind farm				210	operating	2022		onshore						Iberdrola		-32.5954	137.885	exact	Port Paterson			South Australia	https://gem.wiki/Port_Augusta_Renewable_Energy_Park_wind_farm	L906058	G908259	ES0144580Y14	1	210	210	2	2062	2102	2142
wind	Spain	Europe	Southern Europe	Pozocañada wind farm				24	operating	2001		onshore						Iberdrola Renovables Energia SA		38.7723	-1.739	exact			Albacete	Castile-La Mancha	https://gem.wiki/Pozocañada_wind_farm	L912500	G915617	ES0144580Y14	1	24	24	23	2041	2081	2121
wind	Spain	Europe	Southern Europe	Préjano wind farm				30	operating	2005		onshore						Iberdrola Renovables Energia SA		42.1481	-2.1966	exact				Rioja	https://gem.wiki/Préjano_wind_farm	L913352	G916611	ES0144580Y14	1	30	30	19	2045	2085	2125
wind	Spain	Europe	Southern Europe	Puerto Málaga wind farm	1		Puerto de Málaga	12	operating	2008		onshore						Iberdrola Renovables Energia SA		37.5251	-7.4925	exact		El Andévalo	Huelva	Andalusia	https://gem.wiki/Puerto_Málaga_wind_farm	L909193	G911933	ES0144580Y14	1	12	12	16	2048	2088	2128
wind	Spain	Europe	Southern Europe	Puylobo wind farm				49	operating	2020		onshore						Iberdrola Renovables Energia SA		41.8708	-1.4826	approximate	Borja		Zaragosa	Aragón	https://gem.wiki/Puylobo_wind_farm	L914812	G918327	ES0144580Y14	1	49	49	4	2060	2100	2140
wind	Spain	Europe	Southern Europe	Radona wind farm	1			24	operating	2009		onshore						Iberdrola Renovables Energia SA		41.2956	-2.4713	exact			Soria	Castile and León	https://gem.wiki/Radona_wind_farm	L912503	G915620	ES0144580Y14	1	56		15	2049	2089	2129
wind	Spain	Europe	Southern Europe	Radona wind farm	2			32	operating	2009		onshore						Iberdrola Renovables Energia SA		41.2956	-2.4713	exact			Soria	Castile and León	https://gem.wiki/Radona_wind_farm	L912503	G916838	ES0144580Y14	1	56	56	15	2049	2089	2129
wind	Spain	Europe	Southern Europe	Regodeseves wind farm				40	cancelled			onshore						Iberdrola Renovables Energia SA		43.3114	-6.9863	approximate	Villanueva de Oscos			Asturias	https://gem.wiki/Regodeseves_wind_farm	L914247	G917660	ES0144580Y14	1	40	40	-99	40	80	120
wind	Spain	Europe	Southern Europe	Reventones wind farm				34	operating	2007		onshore						Iberdrola Renovables Energia SA		38.6856	-1.4043	exact	Jumilla	Altiplano	Region of Murcia	Region of Murcia	https://gem.wiki/Reventones_wind_farm	L913726	G917060	ES0144580Y14	1	34	34	17	2047	2087	2127
wind	Brazil	Americas	Latin America and the Caribbean	Rio Do Fogo wind farm	RN 15	Parque Eólico Rio do Fogo		49	operating	2006		onshore						Iberdrola Neoenergia		-5.3097	-35.3867	exact	Rio do Fogo		Região Geográfica Intermediária de Natal	Rio Grande do Norte	https://gem.wiki/Rio_Do_Fogo_wind_farm	L905339	G907103	ES0144580Y14	1	49	49	18	2046	2086	2126
wind	Spain	Europe	Southern Europe	Sabina wind farm				48	operating	2008		onshore						Iberdrola Renovables Energia SA		38.6317	-1.9251	exact			Albacete	Castile-La Mancha	https://gem.wiki/Sabina_wind_farm	L914739	G918234	ES0144580Y14	1	48	48	16	2048	2088	2128
wind	France	Europe	Western Europe	Saint-Brieuc wind farm				496	construction	2023		offshore hard mount						Iberdrola SA		48.5864	2.6807	approximate	Saint-Brieuc		Brittany		https://gem.wiki/Saint-Brieuc_wind_farm	L916208	G920006	ES0144580Y14	1	496	496	1	2063	2103	2143
wind	Spain	Europe	Southern Europe	San Borondón wind farm				238	pre-construction			offshore floating						Iberdrola Renovables Energia SA		27.7542	-15.3476	approximate	San Bartolomé de Tirajana		Gran Canaria	Las Islas Canarias	https://gem.wiki/San_Borondón_wind_farm	L916025	G919790	ES0144580Y14	1	238	238	-99	40	80	120
wind	Spain	Europe	Southern Europe	San Brandan Floating Offshore wind farm				490	pre-construction	2027		offshore floating						Iberdrola Renovables Energia SA		43.953	-8.3527	approximate					https://gem.wiki/San_Brandan_Floating_Offshore_wind_farm	L920783	G925605	ES0144580Y14	1	490		-3	2067	2107	2147
wind	Spain	Europe	Southern Europe	San Cibrao Floating Offshore wind farm				490	pre-construction	2027		offshore floating						Iberdrola Renovables Energia SA		43.9675	-7.4383	approximate					https://gem.wiki/San_Cibrao_Floating_Offshore_wind_farm	L920784	G925606	ES0144580Y14	1	490	490	-3	2067	2107	2147
wind	Spain	Europe	Southern Europe	San Cristobál (Iberdrola) wind farm				28	pre-construction			onshore						Iberdrola Renovables Energia SA		37.293	-4.878	approximate	Estepa		Sevilla	Andalucía	https://gem.wiki/San_Cristobál_(Iberdrola)_wind_farm	L913062	G916272	ES0144580Y14	1	28	28	-99	40	80	120
wind	Brazil	Americas	Latin America and the Caribbean	Santa Luzia wind farm	Canoas	Complexo Eólico Santa Luzia		32	operating	2017		onshore						Iberdrola Neoenergia		-6.8866	-36.7687	exact	São José do Sabugi	Região Metropolitana de Patos	Região Geográfica Intermediária de Campina Grande	Paraíba	https://gem.wiki/Santa_Luzia_wind_farm	L905340	G907104	ES0144580Y14	1	96		7	2057	2097	2137
wind	Brazil	Americas	Latin America and the Caribbean	Santa Luzia wind farm	Lagoa 1	Complexo Eólico Santa Luzia		32	operating	2017		onshore						Iberdrola Neoenergia		-6.8803	-36.8172	exact	Santa Luzia	Região Metropolitana de Patos	Região Geográfica Intermediária de Patos	Paraíba	https://gem.wiki/Santa_Luzia_wind_farm	L905340	G907105	ES0144580Y14	1	96		7	2057	2097	2137
wind	Brazil	Americas	Latin America and the Caribbean	Santa Luzia wind farm	Lagoa 2	Complexo Eólico Santa Luzia		32	operating	2017		onshore						Iberdrola Neoenergia		-6.8427	-36.7918	exact	São José do Sabugi	Região Metropolitana de Patos	Região Geográfica Intermediária de Patos	Paraíba	https://gem.wiki/Santa_Luzia_wind_farm	L905340	G907106	ES0144580Y14	1	96	96	7	2057	2097	2137
wind	Mexico	Americas	Latin America and the Caribbean	Santiago Eolico wind farm		Proyecto Eolico Santiago S Felipe		105	operating	2021		onshore						Iberdrola Renovables Energia SA		21.7134	-101.244	exact	San Felipe			Guanajuto	https://gem.wiki/Santiago_Eolico_wind_farm	L905347	G907118	ES0144580Y14	1	105	105	3	2061	2101	2141
wind	Japan	Asia	Eastern Asia	Satsuma Offshore wind farm		薩摩洋上風力発電事業	Satsuma Offshore Wind Power Project	600	shelved			offshore mount unknown						Iberdrola Renewables Japan; Mitsui Fudosan; Green Investment Group (GIG)		31.8195	130.144	approximate			Kagoshima Prefecture		https://gem.wiki/Satsuma_Offshore_wind_farm	L901167	G901360	ES0144580Y14	0.333333	600	600	-99	40	80	120
wind	Spain	Europe	Southern Europe	Savalla wind farm				18	operating			onshore						Iberdrola Renovables Energia SA		41.5382	1.2842	exact	Savallà del Comtat	Conca de Barberà	Tarragona	Catalonia	https://gem.wiki/Savalla_wind_farm	L911221	G914177	ES0144580Y14	1	18	18	-99	40	80	120
wind	Hungary	Europe	Eastern Europe	Scott wind farm			Scott Iberdrola	36	operating	2011		onshore						Iberdrola Renovables Energia SA		47.6347	18.0772	approximate	Nagyigmand	Komaron-Esztergom			https://gem.wiki/Scott_wind_farm	L913938	G917302	ES0144580Y14	1	36	36	13	2051	2091	2131
wind	Japan	Asia	Eastern Asia	Seihoku-Oki Offshore wind farm	1	青森西北沖洋上風力, 青森西北沖洋上風力発電事業	Seihoku-oki offshore wind farm, Nishikita wind park, Aomori Northwest offshore wind farm	600	pre-construction	2025		offshore mount unknown						Cosmo Eco Power CO LTD; Iberdrola Renewables Japan; Hitachi Zosen Inova AG		40.926	140.233	approximate	Nakadomari	Kitatsugaru District	Aomori Prefecture		https://gem.wiki/Seihoku-Oki_Offshore_wind_farm	L900719	G900822	ES0144580Y14	0.333333	600	600	-1	2065	2105	2145
wind	Spain	Europe	Southern Europe	Serra Da Panda wind farm			Coriscada II	18	operating	2002		onshore						Iberdrola Renovables Energia SA		43.6389	-7.7588	exact		Ortegal		Galicia	https://gem.wiki/Serra_Da_Panda_wind_farm	L911229	G914187	ES0144580Y14	1	18	18	22	2042	2082	2122
wind	Spain	Europe	Southern Europe	Serra De Meira wind farm				49	operating	2005		onshore						Iberdrola Renovables Energia SA		43.2134	-7.2937	exact	Meira	Meira		Galicia	https://gem.wiki/Serra_De_Meira_wind_farm	L914816	G918336	ES0144580Y14	1	49	49	19	2045	2085	2125
wind	Portugal	Europe	Southern Europe	Serra Do Alvão wind farm			Parque Eólico Serra do Alvão	42	operating	2009		onshore						Iberdrola Renovables Energia SA		41.4167	-7.7355	exact	Vila Real	Vila Real			https://gem.wiki/Serra_Do_Alvão_wind_farm	L914398	G917843	ES0144580Y14	1	42	42	15	2049	2089	2129
wind	Spain	Europe	Southern Europe	Serra Do Burgo wind farm	1			16	operating	2002		onshore						Iberdrola Renovables Energia SA		42.3301	-7.4101	exact	Castro Caldelas	Terra de Caldelas		Galicia	https://gem.wiki/Serra_Do_Burgo_wind_farm	L909256	G913543	ES0144580Y14	1	28		22	2042	2082	2122
wind	Spain	Europe	Southern Europe	Serra Do Burgo wind farm	Amplicación			12	operating	2004		onshore						Iberdrola Renovables Energia SA		42.2501	-7.3833	exact	Chandrexa de Queixa	Terra de Trives		Galicia	https://gem.wiki/Serra_Do_Burgo_wind_farm	L909256	G912000	ES0144580Y14	1	28	28	20	2044	2084	2124
wind	Spain	Europe	Southern Europe	Serra Do Larouco wind farm			Larouco	42	operating	2002		onshore						Iberdrola Renovables Energia SA		42.0635	-7.7246	exact	Xinzo de Limia	A Limia		Galicia	https://gem.wiki/Serra_Do_Larouco_wind_farm	L914399	G917844	ES0144580Y14	1	42	42	22	2042	2082	2122
wind	Ireland	Europe	Northern Europe	Shelmalere wind farm				1000	announced			offshore hard mount						DP Energy; Iberdrola SA		52.3401	-6.0701	approximate					https://gem.wiki/Shelmalere_wind_farm	L916302	G920116	ES0144580Y14	0.5	1000	1000	-99	40	80	120
wind	Spain	Europe	Southern Europe	Sierra De Dueña wind farm				31	operating	2004		onshore						Iberdrola Renovables Energia SA		40.6901	-5.8201	approximate	Las Veguillas		Salamanca	Castilla y León	https://gem.wiki/Sierra_De_Dueña_wind_farm	L913453	G916729	ES0144580Y14	1	31	31	20	2044	2084	2124
wind	Spain	Europe	Southern Europe	Sierra De La Oliva wind farm	1		Oliva	47	operating	2005		onshore						Iberdrola Renovables Energia SA		38.7388	-1.0288	exact	Almansa		Albacete	Castile-La Mancha	https://gem.wiki/Sierra_De_La_Oliva_wind_farm	L913366	G918127	ES0144580Y14	1	47	47	19	2045	2085	2125
wind	Spain	Europe	Southern Europe	Sierra De Las Cabras (Iberdrola) wind farm				22	operating	2012		onshore						Iberdrola Renovables Energia SA		38.4919	-1.401	exact	Jumilla	Altiplano	Region of Murcia	Region of Murcia	https://gem.wiki/Sierra_De_Las_Cabras_(Iberdrola)_wind_farm	L912125	G915196	ES0144580Y14	1	22	22	12	2052	2092	2132
wind	Spain	Europe	Southern Europe	Sierra De Mira wind farm			Mira	38	operating	2002		onshore						Iberdrola Renovables Energia SA		39.7283	-1.3816	exact			Cuenca	Castile-La Mancha	https://gem.wiki/Sierra_De_Mira_wind_farm	L914095	G917480	ES0144580Y14	1	38	38	22	2042	2082	2122
wind	Spain	Europe	Southern Europe	Sierra De Pinilla wind farm			Pinilla	23	operating	2002		onshore						Iberdrola Renovables Energia SA		38.716	-1.6022	exact	Chinchilla de Monte-Aragón		Albacete	Castile-La Mancha	https://gem.wiki/Sierra_De_Pinilla_wind_farm	L912273	G915364	ES0144580Y14	1	23	23	22	2042	2082	2122
wind	Spain	Europe	Southern Europe	Sierra Del Buey wind farm				20	operating	2003		onshore						Iberdrola Renovables Energia SA		38.5201	-1.2411	exact	Jumilla	Altiplano	Region of Murcia	Region of Murcia	https://gem.wiki/Sierra_Del_Buey_wind_farm	L911694	G914707	ES0144580Y14	1	20	20	21	2043	2083	2123
wind	Spain	Europe	Southern Europe	Sierra Del Escudo wind farm			El Escudo	105	construction			onshore						Iberdrola Renovables Energia SA		43.0306	-3.9893	approximate	Campoo de Yuso			Cantabria	https://gem.wiki/Sierra_Del_Escudo_wind_farm	L915896	G919642	ES0144580Y14	1	105	105	-99	40	80	120
wind	Spain	Europe	Southern Europe	Sierra Del Romeral wind farm				24	operating	2003		onshore						Iberdrola Renovables Energia SA		39.6527	-3.3903	exact		Mancha Alta de Toledo	Toledo	Castile-La Mancha	https://gem.wiki/Sierra_Del_Romeral_wind_farm	L912524	G915646	ES0144580Y14	1	24	24	21	2043	2083	2123
wind	Spain	Europe	Southern Europe	Sierra Menera wind farm	2			40	cancelled			onshore						Iberdrola Renovables Energia SA		40.7342	-1.6172	exact			Guadalajara	Castile-La Mancha	https://gem.wiki/Sierra_Menera_wind_farm	L914257	G917672	ES0144580Y14	1	40	40	-99	40	80	120
wind	Spain	Europe	Southern Europe	Sierra Quemada wind farm				26	operating	2001		onshore						Iberdrola Renovables Energia SA		38.7269	-1.9259	exact			Albacete	Castile-La Mancha	https://gem.wiki/Sierra_Quemada_wind_farm	L912835	G916003	ES0144580Y14	1	26	26	23	2041	2081	2121
wind	Spain	Europe	Southern Europe	Sierro wind farm				20	operating	2004		onshore						Iberdrola Renovables Energia SA		41.3001	-2.9952	exact			Soria	Castile and León	https://gem.wiki/Sierro_wind_farm	L911696	G914709	ES0144580Y14	1	20	20	20	2044	2084	2124
wind	Spain	Europe	Southern Europe	Sil wind farm	1			49	operating	2004		onshore						Iberdrola Renovables Energia SA		42.3654	-7.6654	exact	Nogueira de Remuín		Ourense	Galicia	https://gem.wiki/Sil_wind_farm	L909260	G912004	ES0144580Y14	1	89		20	2044	2084	2124
wind	Spain	Europe	Southern Europe	Sil wind farm	1 Amplicación			28	operating	2007		onshore						Iberdrola Renovables Energia SA		42.4101	-7.7301	approximate	Esgos	Ourense		Galicia	https://gem.wiki/Sil_wind_farm	L909260	G918338	ES0144580Y14	1	89		17	2047	2087	2127
wind	Spain	Europe	Southern Europe	Sil wind farm	2 Amplicación			12	operating	2010		onshore						Iberdrola Renovables Energia SA		42.4131	-7.7261	approximate	Nogueira		Ourense	Galicia	https://gem.wiki/Sil_wind_farm	L909260	G916276	ES0144580Y14	1	89	89	14	2050	2090	2130
wind	Spain	Europe	Southern Europe	Somolinos wind farm				11	operating	2006		onshore						Iberdrola Renovables Energia SA		41.2822	-3.0885	exact	Somolinos		Guadalajara	Castile-La Mancha	https://gem.wiki/Somolinos_wind_farm	L908526	G911228	ES0144580Y14	1	11	11	18	2046	2086	2126
wind	Spain	Europe	Southern Europe	Tacica De Plata wind farm				26	operating	2008		onshore						Iberdrola Renovables Energia SA		37.1494	-2.7399	exact	Las Tres Villas		Almeria	Andalusia	https://gem.wiki/Tacica_De_Plata_wind_farm	L912842	G916011	ES0144580Y14	1	26	26	16	2048	2088	2128
wind	Portugal	Europe	Southern Europe	Tâmega wind farm	Norte		Complexo Eólico Tâmega	150	pre-construction	2024		onshore						Iberdrola Renovables Energia SA		41.8097	-7.4126	approximate	Chaves		Chaves	Norte	https://gem.wiki/Tâmega_wind_farm	L916002	G919764	ES0144580Y14	1	300		0	2064	2104	2144
wind	Portugal	Europe	Southern Europe	Tâmega wind farm	Sul		Complexo Eólico Tâmega	150	pre-construction	2024		onshore						Iberdrola Renovables Energia SA		41.8097	-7.4126	approximate	Chaves		Chaves	Norte	https://gem.wiki/Tâmega_wind_farm	L916002	G919800	ES0144580Y14	1	300	300	0	2064	2104	2144
wind	Spain	Europe	Southern Europe	Tarayuela wind farm				30	operating	2006		onshore						Iberdrola Renovables Energia SA		41.4401	-2.3701	exact	Soliedra		Soria	Castile and León	https://gem.wiki/Tarayuela_wind_farm	L913381	G916645	ES0144580Y14	1	30	30	18	2046	2086	2126
wind	Spain	Europe	Southern Europe	Tardienta wind farm	1			50	operating	2001		onshore						Iberdrola Renovables Energia SA		41.924	-0.582	exact		Los Monegros		Aragon	https://gem.wiki/Tardienta_wind_farm	L914487	G918633	ES0144580Y14	1	94		23	2041	2081	2121
wind	Spain	Europe	Southern Europe	Tardienta wind farm	2			44	operating	2001		onshore						Iberdrola Renovables Energia SA		41.911	-0.561	exact		Los Monegros		Aragon	https://gem.wiki/Tardienta_wind_farm	L914487	G917947	ES0144580Y14	1	94	94	23	2041	2081	2121
wind	Spain	Europe	Southern Europe	Urbel Del Castillo wind farm	2			50	operating	2006		onshore						Iberdrola Renovables Energia SA		42.5843	-3.8016	exact	Úrbel del Castillo		Burgos	Castile and León	https://gem.wiki/Urbel_Del_Castillo_wind_farm	L915071	G918657	ES0144580Y14	1	50	50	18	2046	2086	2126
wind	Spain	Europe	Southern Europe	Valdecarrión wind farm				34	operating	2010		onshore						Iberdrola Renovables Energia SA		42.6401	-6.1101	exact	Villagatón		León	Castile and León	https://gem.wiki/Valdecarrión_wind_farm	L913735	G917071	ES0144580Y14	1	34	34	14	2050	2090	2130
wind	Spain	Europe	Southern Europe	Valdefuentes wind farm				28	operating	2009		onshore						Iberdrola Renovables Energia SA		37.5076	-7.2704	exact	El Almendro	El Andévalo	Huelva	Andalusia	https://gem.wiki/Valdefuentes_wind_farm	L913076	G916288	ES0144580Y14	1	28	28	15	2049	2089	2129
wind	Spain	Europe	Southern Europe	Valdelanave wind farm				10	operating	2012		onshore						Iberdrola Renovables Energia SA		41.5248	-5.9675	approximate	Muelas del Pan		Zamora	Castilla y León	https://gem.wiki/Valdelanave_wind_farm	L908215	G910906	ES0144580Y14	1	10	10	12	2052	2092	2132
wind	Spain	Europe	Southern Europe	Valdemoro wind farm				50	construction	2023		onshore						Iberdrola Renovables Energia SA		42.475	-3.8347	approximate	Valle de Santibáñez		Burgos	Castilla y León	https://gem.wiki/Valdemoro_wind_farm	L915074	G918660	ES0144580Y14	1	50	50	1	2063	2103	2143
wind	Spain	Europe	Southern Europe	Valdeperondo wind farm				46	operating	2010		onshore						Iberdrola Renovables Energia SA		42.372	-5.0304	approximate	Cea		León	Castilla y León	https://gem.wiki/Valdeperondo_wind_farm	L914619	G918099	ES0144580Y14	1	46	46	14	2050	2090	2130
wind	Spain	Europe	Southern Europe	Valdeporres wind farm				31	operating	2004		onshore						Iberdrola Renovables Energia SA		43.0206	-3.7686	approximate	Merindad de Valdeporres		Burgos	Castilla y León	https://gem.wiki/Valdeporres_wind_farm	L913455	G916732	ES0144580Y14	1	31	31	20	2044	2084	2124
wind	Spain	Europe	Southern Europe	Valdesantos wind farm			Herrera II (Valdesantos)	13	operating	2021		onshore						Iberdrola Renovables Energia SA		42.3616	-3.9304	approximate	Isar		Burgos	Castilla y León	https://gem.wiki/Valdesantos_wind_farm	L909652	G912424	ES0144580Y14	1	13	13	3	2061	2101	2141
wind	Spain	Europe	Southern Europe	Valmediano wind farm				34	operating	2003		onshore						Iberdrola Renovables Energia SA		41.8347	-5.8888	exact			Zamora	Castile and León	https://gem.wiki/Valmediano_wind_farm	L913736	G917072	ES0144580Y14	1	34	34	21	2043	2083	2123
wind	Spain	Europe	Southern Europe	Ventosa Del Ducado wind farm				44	operating	2012		onshore						Iberdrola Renovables Energia SA		41.1946	-2.5112	exact			Soria	Castile and León	https://gem.wiki/Ventosa_Del_Ducado_wind_farm	L914491	G917951	ES0144580Y14	1	44	44	12	2052	2092	2132
wind	Spain	Europe	Southern Europe	Verdigueiro wind farm				36	construction			onshore						Iberdrola Renovables Energia SA		43.3093	-6.492	approximate	Tineo			Asturias	https://gem.wiki/Verdigueiro_wind_farm	L913953	G917319	ES0144580Y14	1	36	36	-99	40	80	120
wind	Spain	Europe	Southern Europe	Vieiro wind farm			O Vieiro	20	operating	2008		onshore						Iberdrola Renovables Energia SA		42.0948	-7.9892	exact	Verea	Terra da Celanova		Galicia	https://gem.wiki/Vieiro_wind_farm	L911724	G914739	ES0144580Y14	1	20	20	16	2048	2088	2128
wind	Spain	Europe	Southern Europe	Villarino Wind Complex				300	pre-construction			onshore						Iberdrola Renovables Energia SA		40.9652	-5.664	approximate	Arribes del Duero		Salamanca	Castilla y León	https://gem.wiki/Villarino_Wind_Complex	L916107	G919884	ES0144580Y14	1	300	300	-99	40	80	120
wind	Spain	Europe	Southern Europe	Virgen De Belén wind farm	2			24	operating	2000		onshore						Iberdrola Renovables Energia SA		38.9185	-1.2954	exact			Albacete	Castile-La Mancha	https://gem.wiki/Virgen_De_Belén_wind_farm	L908224	G915670	ES0144580Y14	1	57		24	2040	2080	2120
wind	Spain	Europe	Southern Europe	Virgen De Belén wind farm	1			23	operating	2001		onshore						Iberdrola Renovables Energia SA		38.872	-1.3177	exact			Albacete	Castile-La Mancha	https://gem.wiki/Virgen_De_Belén_wind_farm	L908224	G915382	ES0144580Y14	1	57		23	2041	2081	2121
wind	Spain	Europe	Southern Europe	Virgen De Belén wind farm	1 Ampliación			10	operating			onshore						Iberdrola Renovables Energia SA		38.8652	-1.3317	exact			Albacete	Castile-La Mancha	https://gem.wiki/Virgen_De_Belén_wind_farm	L908224	G910917	ES0144580Y14	1	57	57	-99	40	80	120
wind	Spain	Europe	Southern Europe	Virgen De Los Llanos wind farm	1			26	operating	1999		onshore						Iberdrola Renovables Energia SA		38.9787	-1.422	exact			Albacete	Castile-La Mancha	https://gem.wiki/Virgen_De_Los_Llanos_wind_farm	L912290	G916026	ES0144580Y14	1	49		25	2039	2079	2119
wind	Spain	Europe	Southern Europe	Virgen De Los Llanos wind farm	2			23	operating	1999		onshore						Iberdrola Renovables Energia SA		38.9787	-1.422	exact			Albacete	Castile-La Mancha	https://gem.wiki/Virgen_De_Los_Llanos_wind_farm	L912290	G915383	ES0144580Y14	1	49	49	25	2039	2079	2119
wind	Spain	Europe	Southern Europe	Viveiro wind farm				37	operating	2003		onshore						Iberdrola Renovables Energia SA		43.641	-7.5461	exact		A Mariña Occidental		Galicia	https://gem.wiki/Viveiro_wind_farm	L914009	G917383	ES0144580Y14	1	37	37	21	2043	2083	2123
wind	Australia	Oceania	Australia and New Zealand	Walkaway wind farm	1		Alinta wind farm	89	operating	2006		onshore						Iberdrola Australia		-28.8988	114.869	exact				Western Australia	https://gem.wiki/Walkaway_wind_farm	L906060	G908262	ES0144580Y14	1	440		18	2046	2086	2126
wind	Australia	Oceania	Australia and New Zealand	Walkaway wind farm	2		Walkaway 2	41	cancelled			onshore						Iberdrola Australia		-32.3601	115.785	approximate				Western Australia	https://gem.wiki/Walkaway_wind_farm	L906060	G908400	ES0144580Y14	1	440		-99	40	80	120
wind	Australia	Oceania	Australia and New Zealand	Walkaway wind farm	3		Walkaway 3	310	cancelled			onshore						Iberdrola Australia		-32.3601	115.785	approximate				Western Australia	https://gem.wiki/Walkaway_wind_farm	L906060	G908401	ES0144580Y14	1	440	440	-99	40	80	120
wind	Germany	Europe	Western Europe	Wikinger Nord wind farm				40	cancelled			offshore hard mount						Iberdrola Renovables Energia SA		54.8329	13.9576	approximate					https://gem.wiki/Wikinger_Nord_wind_farm	L914277	G917695	ES0144580Y14	1	40	40	-99	40	80	120
wind	Germany	Europe	Western Europe	Wikinger Süd wind farm				10	pre-construction			offshore hard mount						Iberdrola Renovables Energia SA		54.82	14.12	exact					https://gem.wiki/Wikinger_SüD_wind_farm	L920285	G924941	ES0144580Y14	1	10	10	-99	40	80	120
wind	Germany	Europe	Western Europe	Wikinger wind farm				350	operating	2018		offshore hard mount						Iberdrola Renovables Energia SA [51%]; Energy Infrastructure Partners (EIP) [49%]		54.834	14.068	exact					https://gem.wiki/Wikinger_wind_farm	L916140	G919927	ES0144580Y14	0.5	350	350	6	2058	2098	2138
wind	Germany	Europe	Western Europe	Windanker wind farm				300	pre-construction	2026		offshore hard mount						Iberdrola Renovables Energia SA		54.8353	13.9727	approximate					https://gem.wiki/Windanker_wind_farm	L916109	G919886	ES0144580Y14	1	300	300	-2	2066	2106	2146
wind	Australia	Oceania	Australia and New Zealand	Woakwine wind farm				274	pre-construction	2026		onshore						Iberdrola Australia		-37.3843	140.069	approximate		Woakwine Range		South Australia	https://gem.wiki/Woakwine_wind_farm	L906067	G908269	ES0144580Y14	1	274	274	-2	2066	2106	2146
wind	Spain	Europe	Southern Europe	Yerga wind farm	1			24	operating	2000		onshore						Iberdrola Renovables Energia SA		42.1515	-1.9638	exact				Rioja	https://gem.wiki/Yerga_wind_farm	L912550	G915678	ES0144580Y14	1	55		24	2040	2080	2120
wind	Spain	Europe	Southern Europe	Yerga wind farm	2			31	operating	2002		onshore						Iberdrola Renovables Energia SA		42.1435	-1.9561	exact				Rioja	https://gem.wiki/Yerga_wind_farm	L912550	G916734	ES0144580Y14	1	55	55	22	2042	2082	2122
wind	Poland	Europe	Eastern Europe	Zopowy wind farm				30	operating			onshore						Iberdrola		50.1544	17.7577	approximate	Opole		Opole County	Opole Voivodeship	https://gem.wiki/Zopowy_wind_farm	L913412	G916678	ES0144580Y14	1	30	30	-99	40	80	120
wind	Spain	Europe	Southern Europe	Zorreras wind farm			Zorreras 1	32	operating	2007		onshore						Iberdrola Renovables Energia SA		36.4634	-5.9452	approximate	Medina-Sidonia		Cádiz	Andalucía	https://gem.wiki/Zorreras_wind_farm	L913557	G916857	ES0144580Y14	1	32	32	17	2047	2087	2127

## Sheet: Factors
Fuel Type	Capacity factor 2021	Capacity factor 2022	CF2020	CF2021	CF2022	CF2023		Iberdrola S.A. - annual report 2021	https://www.iberdrola.com/documents/20125/42394/gsm21_IA_IntegratedReport21.pdf/784c7de6-a4e6-c2d2-9221-1b6cd689e970?t=1631263251236
Coal-hard	0.037786	0	0.0755721	0	0	0		Iberdrola S.A. - annual report 2022	https://www.iberdrola.com/documents/20125/1606413/gsm22_IA_IntegratedReport22.pdf
Lignite	0	0	0	0	0	0
Oil	0	0	0	0	0	0
Gas	0.390213	0.319441	0.384364	0.396062	0.334063	0.30482
Fuel Type	Heat rate (Btu per kWh) 2022
Coal	10689							CDP C-EU8.2d 2021
Petroleum	11166							Energy Source Type	Nameplate capacity (MW)	Gross electricity generation (GWh)	Net electricity generation (GWh)	Absolute scope 1 emissions (metric tons CO2e)	Scope 1 emissions intensity (metric tons CO2e per GWh)		Capacity factor
Natural Gas	7740							Coal – hard	0	0	0	0	0
Nuclear	10448							Lignite	0	0	0	0	0
								Oil	0	0	0	0	0
Fuel Type	Emission factors (kg of CO2 per TJ) US		Fuel Type	Emission factors (kg of CO2 per TJ) IPCC2006				Gas	8777	25764	25259	9233464	358		0.335091
Bituminous Coal	88374.7		Crude Oil	73300				Sustainable biomass	0	0	0	0	0
Distillate Oil	70271.4		Natural Gas Liquids	64200				Other biomass	0	0	0	0	0
Jet Fuel	68461		Coking Coal	94600				Waste (non-biomass)	0	0	0	0	0
Kerosene	69370.9		Other Bituminous Coal	94600				Nuclear	3177	23657	23193	0	0
Lignite Coal	93142.3		Sub-Bituminous Coal	96100				Fossil-fuel plants fitted with CCS	0	0	0	0	0
Municipal Solid Waste	47286.7		Lignite	101000				Geothermal	0	0	0	0	0
Natural Gas	50149.2		Coke	107000				Hydropower	13849	24861	24374	0	0		0.204926
Petroleum Coke	96791.4		Gas/Diesel Oil	74100				Wind	20920	47523	46591	0	0		0.259321
Propane Gas	59598.9		Residual Fuel Oil	77400				Solar	3266	2809	2754	0	0		0.0981819
Refined Coal	88374.7		Natural Gas	56100				Marine	0	0	0	0	0
Residual Fuel Oil	71171.8		Natural Gas Liquids	64200				Other renewable	0	0	0	0	0
Subbituminous Coal	92061.8		Wood / Wood Waste	112000				Other non-renewable	1185	7302	7159	3515703	491		0.703428
Tire-Derived Fuel	81484.1		Charcoal	112000				Total	51174	131916	129330	12749167	96.64		0.294269
Waste Coal	88374.7		Industrial Wastes	143000
Waste Oil	70138.7		Waste Oils	73300				CDP C-EU8.2d 2022
Fuel Type	Emission factors (kg of CO2 per MMBTU) US		Fuel Type	Emission factors (kg of CO2 per MMBTU) IPCC2006				Energy Source Type	Nameplate capacity (MW)	Gross electricity generation (GWh)	Net electricity generation (GWh)	Absolute scope 1 emissions (metric tons CO2e)	Scope 1 emissions intensity (metric tons CO2e per GWh)		Capacity factor
Bituminous Coal	93.24		Crude Oil	77.3354				Coal – hard	0	0	0	0	0
Distillate Oil	74.14		Natural Gas Liquids	67.7344				Lignite	0	0	0	0	0
Jet Fuel	72.23		Coking Coal	99.808				Oil	0	0	0	0	0
Kerosene	73.19		Other Bituminous Coal	99.808				Gas	9291	21731	21305	7799516	366		0.267001
Lignite Coal	98.27		Sub-Bituminous Coal	101.391				Sustainable biomass	0	0	0	0	0
Municipal Solid Waste	49.89		Lignite	106.56				Other biomass	0	0	0	0	0
Natural Gas	52.91		Coke	112.891				Waste (non-biomass)	0	0	0	0	0
Petroleum Coke	102.12		Gas/Diesel Oil	78.1794				Nuclear	3177	24363	23886	0	0
Propane Gas	62.88		Residual Fuel Oil	81.6611				Fossil-fuel plants fitted with CCS	0	0	0	0	0
Refined Coal	93.24		Natural Gas	59.1885				Geothermal	0	0	0	0	0
Residual Fuel Oil	75.09		Natural Gas Liquids	67.7344				Hydropower	14104	21340	20922	0	0		0.172722
Subbituminous Coal	97.13		Wood / Wood Waste	118.166				Wind	21384	50685	49692	36854	0.74		0.270574
Tire-Derived Fuel	85.97		Charcoal	118.166				Solar	4264	3913	3837	0	0		0.104758
Waste Coal	93.24		Industrial Wastes	150.873				Marine	0	0	0	0	0
Waste Oil	74		Waste Oils	77.3354				Other renewable	211	74.46	73	0	0
								Other non-renewable	1185	5939	5823	2873615	493.5		0.572125
								Total	53616	128045	125538	10709985	85.31		0.272625
								Data for Production and Installed Capacity include the power stations in which Iberdrola has a stake, based on its percentage interest.
								https://www.iberdrola.com/documents/20125/42388/IB_Integrated_Report.pdf
								https://www.iberdrola.com/documents/20125/1606413/gsm22_IA_IntegratedReport22.pdf
									2020	2021	2022	2023
								GEM (MW)	7280.3	7280.3	7280.3	7280.3
								Combined cycle natural gas (MW)	8777	8777	9291	9291
								Net electricity production (GWh)	24513	25259	21305	19440
								CF1	0.318821	0.328523	0.261767	0.238852
								CF2	0.384364	0.396062	0.334063	0.30482
								Coal (MW)	358
								Coal (GWh)	237
								https://www.iberdrola.com/documents/20125/1606413/gsm22_IA_IntegratedReport22.pdf	0.0755721
								Gas combined cycle	2020	2021	2022	2023
								MW	15820	15820	16334	16334
								GWh	63673	59963	58574	59161
								CF	0.459457	0.432686	0.409363	0.413465

## Sheet: Iberdrola_BAU
Type	Country/area	Region	Subregion	Plant / Project name	Unit / Phase name	Plant / Project name (local)	Plant / Project name (other)	Capacity (MW)	Status	Start year	Retired year	Technology	Fuel	Country/area 1 (hydropower only)	Country/area 2 (hydropower only)	Country/area 1 Capacity (MW) (hydropower only)	Country/area 2 Capacity (MW) (hydropower only)	Owner	Parent	Latitude	Longitude	Location accuracy	City	Local area (taluk, county)	Major area (prefecture, district)	Subnational unit (state, province)	GEM.Wiki URL	GEM location ID	GEM unit/phase ID	CompISIN	Ownership	Plant capacity	Plant capacity	Age	Reinvestment year	Reinvestment year	Reinvestment year	2020	2021	2022	2023	2024	2025	2026	2027	2028	2029	2030	2031
coal	Spain	Europe	Southern Europe	Lada power station	Unit 4			358	retired	1981	2021	subcritical	bituminous					Iberdrola [100%]	Iberdrola [100.0%]	43.2964	-5.68254	exact	Langreo			Asturias	https://www.gem.wiki/Lada_power_station	L100000103501	G100000106088	ES0144580Y14	1	358	358	43	2021	2061	2101	358	0	0	0	0	0	0	0	0	0	0	0
oil/gas	Spain	Europe	Southern Europe	Aceca 3 power station	1			386	operating	2005		CC	NG					Iberdrola Generacion SA [100.0%]	Iberdrola SA [100.0%]	39.9442	-3.8558	exact	Villaseca de la Sagra			Toledo	https://www.gem.wiki/Aceca_3_power_station	L100000400644	G100000400644	ES0144580Y14	1	386	386	19	2045	2085	2125	386	386	386	386	386	386	386	386	386	386	386	386
oil/gas	Mexico	Americas	Latin America and the Caribbean	Altamira Dynasol cogeneration power station	1	Planta de Cogeneración Altamira Dynasol		57	operating	2017		CC	NG					Iberdrola Generación México [100%]; Iberdrola Cogeneración Altamira SA de CV	Iberdrola SA [100.0%]; Iberdrola Cogeneración Altamira SA de CV	22.4474	-97.9705	exact	Altamira			Tamaulipas	https://www.gem.wiki/Altamira_Dynasol_cogeneration_power_station	L100000406694	G100000406952	ES0144580Y14	1	57	57	7	2057	2097	2137	57	57	57	57	57	57	57	57	57	57	57	57
oil/gas	Spain	Europe	Southern Europe	Arcos de la Frontera power station	CC-1			389.2	operating	2005		CC	NG					Iberdrola Generacion SA [100.0%]	Iberdrola SA [100.0%]	36.6721	-5.8164	exact	Arcos de La Frontera			Cadiz	https://www.gem.wiki/Arcos_de_la_Frontera_power_station	L100000400649	G100000400649	ES0144580Y14	1	1585.4		19	2045	2085	2125	389.2	389.2	389.2	389.2	389.2	389.2	389.2	389.2	389.2	389.2	389.2	389.2
oil/gas	Spain	Europe	Southern Europe	Arcos de la Frontera power station	CC-2			373.2	operating	2005		CC	NG					Iberdrola Generacion SA [100.0%]	Iberdrola SA [100.0%]	36.6721	-5.8164	exact	Arcos de La Frontera			Cadiz	https://www.gem.wiki/Arcos_de_la_Frontera_power_station	L100000400649	G100000400650	ES0144580Y14	1	1585.4		19	2045	2085	2125	373.2	373.2	373.2	373.2	373.2	373.2	373.2	373.2	373.2	373.2	373.2	373.2
oil/gas	Spain	Europe	Southern Europe	Arcos de la Frontera power station	CC-3			823	operating	2005		CC	NG					Iberdrola Generacion SA [100.0%]	Iberdrola SA [100.0%]	36.6721	-5.8164	exact	Arcos de La Frontera			Cadiz	https://www.gem.wiki/Arcos_de_la_Frontera_power_station	L100000400649	G100000400651	ES0144580Y14	1	1585.4	1585.4	19	2045	2085	2125	823	823	823	823	823	823	823	823	823	823	823	823
oil/gas	Mexico	Americas	Latin America and the Caribbean	Bajío cogeneration power station	1	Planta de Cogeneración Bajío	Kimberly-Clark San Juan/Cogeneración Bajío	52	operating	2018		CC	NG					Iberdrola Generación México [100%]	Iberdrola SA [100.0%]	20.381	-99.9777	exact	San Juan del Río			Querétaro	https://www.gem.wiki/Bajío_cogeneration_power_station	L100000406190	G100000406531	ES0144580Y14	1	52	52	6	2058	2098	2138	52	52	52	52	52	52	52	52	52	52	52	52
oil/gas	Spain	Europe	Southern Europe	Castejón power station	2	Central térmica Castejón; CICLO COMBINADO DE CASTEJON		378.9	operating	2003		CC	NG					Iberdrola SA [100.0%]	Iberdrola SA [100.0%]	42.1718	-1.6773	exact	Castejon			Navarra	https://www.gem.wiki/Castejón_power_station	L100000400666	G100000400667	ES0144580Y14	1	378.9	378.9	21	2043	2083	2123	378.9	378.9	378.9	378.9	378.9	378.9	378.9	378.9	378.9	378.9	378.9	378.9
oil/gas	Spain	Europe	Southern Europe	Castellón power station	3			782	operating	2002		CC	NG					Iberdrola Generacion SA [100.0%]	Iberdrola SA [100.0%]	39.9592	-0.001	exact	Castelló de la Plana			Castellon	https://www.gem.wiki/Castellón_power_station	L100000400670	G100000400670	ES0144580Y14	1	1640		22	2042	2082	2122	782	782	782	782	782	782	782	782	782	782	782	782
oil/gas	Spain	Europe	Southern Europe	Castellón power station	4			858	operating	2008		CC	NG					Iberdrola Generacion SA [100.0%]	Iberdrola SA [100.0%]	39.9592	-0.001	exact	Castelló de la Plana			Castellon	https://www.gem.wiki/Castellón_power_station	L100000400670	G100000400671	ES0144580Y14	1	1640	1640	16	2048	2088	2128	858	858	858	858	858	858	858	858	858	858	858	858
oil/gas	Mexico	Americas	Latin America and the Caribbean	Dulces Nombres II power station	1	Planta CC Dulces Nombres II	Monterrey V	300	operating	2016		CC	NG					Iberdrola Generación México [100%]	Iberdrola SA [100.0%]	25.7175	-100.096	exact	Dulces Nombres	Pesquería		Nuevo León	https://gem.wiki/Dulces_Nombres_II_power_station	L100000406205	G100000406518	ES0144580Y14	1	300	300	8	2056	2096	2136	300	300	300	300	300	300	300	300	300	300	300	300
oil/gas	Mexico	Americas	Latin America and the Caribbean	El Carmen Nuevo Leon power station	1	Planta CC El Carmen	El Carmen	866	operating	2019		CC	NG					Iberdrola México SA de CV [100%]	Iberdrola SA [100.0%]	25.87	-100.359	approximate	El Carmen			Nuevo León	https://gem.wiki/El_Carmen_Nuevo_Leon_power_station	L100000406652	G100000401028	ES0144580Y14	1	866	866	5	2059	2099	2139	866	866	866	866	866	866	866	866	866	866	866	866
oil/gas	Spain	Europe	Southern Europe	Enercrisa power station	1			21	operating	2009		CC	NG					Enercrisa SA [100.0%]	Grupo Industrial Crimidesa SL [50.0%]; Iberdrola SA [50.0%]	42.4838	-3.15084	exact	Cerezo de Rio Tiron			Burgos	https://www.gem.wiki/Enercrisa_power_station	L100000400679	G100000400679	ES0144580Y14	0.5	21	21	15	2049	2089	2129	10.5	10.5	10.5	10.5	10.5	10.5	10.5	10.5	10.5	10.5	10.5	10.5
oil/gas	Spain	Europe	Southern Europe	Escombreras Iberdrola power station	6			816	operating	2006		CC	NG					Iberdrola SA [100.0%]	Iberdrola SA [100.0%]	37.5647	-0.95132	exact	Cartagena			Murcia	https://www.gem.wiki/Escombreras_Iberdrola_power_station	L100000400682	G100000400682	ES0144580Y14	1	816	816	18	2046	2086	2126	816	816	816	816	816	816	816	816	816	816	816	816
oil/gas	Spain	Europe	Southern Europe	Fuenlabrada Mill power station	1		International Paper Madrid Mill	43	operating	2001		CC	NG					Iberdrola SA [50.0%]; International Paper Co [50.0%]	Iberdrola SA [50.0%]	40.269	-3.77064	exact	Fuenlabrada			Madrid	https://www.gem.wiki/Fuenlabrada_Mill_power_station	L100000400684	G100000400684	ES0144580Y14	0.5	43	43	23	2041	2081	2121	21.5	21.5	21.5	21.5	21.5	21.5	21.5	21.5	21.5	21.5	21.5	21.5
oil/gas	Spain	Europe	Southern Europe	Michelin Aranda power station	1			32	operating	2003		CC	NG					Energyworks Aranda Sl [100.0%]	Iberdrola SA [100.0%]	41.6629	-3.71	exact	Aranda de Duero			Burgos	https://www.gem.wiki/Michelin_Aranda_power_station	L100000400690	G100000400690	ES0144580Y14	1	32	32	21	2043	2083	2123	32	32	32	32	32	32	32	32	32	32	32	32
oil/gas	Spain	Europe	Southern Europe	Michelin Valladolid power station	1			46	operating	2000		CC	NG					Energyworks Vit-vall Sl [100.0%]	Iberdrola SA [100.0%]	41.6753	-4.71607	exact	Valladolid			Valladolid	https://www.gem.wiki/Michelin_Valladolid_power_station	L100000400691	G100000400691	ES0144580Y14	1	46	46	24	2040	2080	2120	46	46	46	46	46	46	46	46	46	46	46	46
oil/gas	Spain	Europe	Southern Europe	Neumaticos Michelin Vitoria power station	1			47	operating	2000		CC	NG					Energyworks Vit-vall Sl [100.0%]	Iberdrola SA [100.0%]	42.8667	-2.67174	exact	Vitoria-Gasteiz			Araba	https://www.gem.wiki/Neumaticos_Michelin_Vitoria_power_station	L100000400694	G100000400694	ES0144580Y14	1	47	47	24	2040	2080	2120	47	47	47	47	47	47	47	47	47	47	47	47
oil/gas	Spain	Europe	Southern Europe	Peninsular de Cogeneracion Mill power station	1			34	operating	2010		CC	NG					Peninsular de Cogeneracion SA [100.0%]	Iberdrola SA [50.0%]; International Paper Co [50.0%]	40.2709	-3.76811	exact	Madrid			Madrid	https://www.gem.wiki/Peninsular_de_Cogeneracion_Mill_power_station	L100000407786	G100000410351	ES0144580Y14	0.5	34	34	14	2050	2090	2130	17	17	17	17	17	17	17	17	17	17	17	17
oil/gas	Mexico	Americas	Latin America and the Caribbean	Ramos cogeneration power station	1	Planta de Cogeneración Ramos	Kimberly-Clark Ramos	52	operating	2016		CC	NG					Iberdrola Generación México [100%]	Iberdrola SA [100.0%]	25.5955	-100.888	exact	Ramos Arizpe			Coahuila	https://www.gem.wiki/Ramos_cogeneration_power_station	L100000406244	G100000406525	ES0144580Y14	1	52	52	8	2056	2096	2136	52	52	52	52	52	52	52	52	52	52	52	52
oil/gas	Spain	Europe	Southern Europe	Santurce power station	4			396	operating	2005		CC	NG					Iberdrola SA [100.0%]	Iberdrola SA [100.0%]	43.34	-3.0539	exact	Santurtzi			Biscay	https://www.gem.wiki/Santurce_power_station	L100000400713	G100000400713	ES0144580Y14	1	396	396	19	2045	2085	2125	396	396	396	396	396	396	396	396	396	396	396	396
oil/gas	Australia	Oceania	Australia and New Zealand	Smithfield Energy Facility power station	4			160	operating	1997	2044	CC	NG					Smithfield Power Generation Pty Ltd [100.0%]	Iberdrola SA [100.0%]	-33.85	150.947	exact	Smithfield			New South Wales	https://www.gem.wiki/Smithfield_Energy_Facility_power_station	L100000405132	G100000401541	ES0144580Y14	1	160	160	27	2037	2077	2117	160	160	160	160	160	160	160	160	160	160	160	160
oil/gas	Spain	Europe	Southern Europe	Tarragona power station	1			417	operating	2004		CC	NG					Tarragona Power SL [100.0%]	Iberdrola SA [100.0%]	41.1102	1.18055	exact	La Canonja			Tarragona	https://www.gem.wiki/Tarragona_power_station	L100000400718	G100000400718	ES0144580Y14	1	417	417	20	2044	2084	2124	417	417	417	417	417	417	417	417	417	417	417	417
hydropower	Portugal	Europe	Southern Europe	Alto Tâmega hydroelectric plant				160	construction	2024		conventional storage				TRUE	FALSE	Iberdrola		41.5739	-7.7311	exact		Vila Real			https://gem.wiki/Alto_Tâmega_hydroelectric_plant	L603189	G603224	ES0144580Y14	1	160	160	0	2064	2104	2144	0	0	0	0	160	160	160	160	160	160	160	160
hydropower	Spain	Europe	Southern Europe	Barazar hydroelectric plant			Barazar 1	84	operating	1957		conventional storage				TRUE	FALSE	Iberdrola		43.0796	-2.7338	exact				Autonomous Community of the Basque Country	https://gem.wiki/Barazar_hydroelectric_plant	L603346	G603381	ES0144580Y14	1	84	84	67	1997	2037	2077	84	84	84	84	84	84	84	84	84	84	84	84
hydropower	Spain	Europe	Southern Europe	Cofrentes hydroelectric plant			Salto de Cofrentes	122	operating	1951		conventional storage				TRUE	FALSE	Iberdrola		39.2468	-1.0939	exact			Valencia	Valencian Community	https://gem.wiki/Cofrentes_hydroelectric_plant	L603357	G603392	ES0144580Y14	1	122	122	73	1991	2031	2071	122	122	122	122	122	122	122	122	122	122	122	122
hydropower	Spain	Europe	Southern Europe	Conso hydroelectric plant			Las Portas	270	operating	1975		unknown				TRUE	FALSE	Iberdrola		42.1142	-7.209	exact		Viana		Galicia	https://gem.wiki/Conso_hydroelectric_plant	L603358	G603393	ES0144580Y14	1	270	270	49	2015	2055	2095	270	270	270	270	270	270	270	270	270	270	270	270
hydropower	Spain	Europe	Southern Europe	Cortes II hydroelectric plant				246	operating	1989		conventional storage				TRUE	FALSE	Iberdrola		39.2636	-0.919	exact			Valencia	Valencian Community	https://gem.wiki/Cortes_II_hydroelectric_plant	L603360	G603395	ES0144580Y14	1	246	246	35	2029	2069	2109	246	246	246	246	246	246	246	246	246	246	246	246
hydropower	Spain	Europe	Southern Europe	Cortes La Muela II hydroelectric plant			La Muela II	882	operating	2013		pumped storage				TRUE	FALSE	Iberdrola		39.2444	-0.9314	exact			Valencia	Valencian Community	https://gem.wiki/Cortes_La_Muela_II_hydroelectric_plant	L603361	G603396	ES0144580Y14	1	882	882	11	2053	2093	2133	882	882	882	882	882	882	882	882	882	882	882	882
hydropower	Portugal	Europe	Southern Europe	Daivões hydroelectric plant				118	operating	2022		conventional storage				TRUE	FALSE	Iberdrola		41.5239	-7.8651	exact		Braga			https://gem.wiki/Daivões_hydroelectric_plant	L603198	G604331	ES0144580Y14	1	118	118	2	2062	2102	2142	0	0	118	118	118	118	118	118	118	118	118	118
hydropower	Portugal	Europe	Southern Europe	Gouvães hydroelectric plant				220	operating	2022		pumped storage				TRUE	FALSE	Iberdrola		41.4938	-7.727	exact		Vila Real			https://gem.wiki/Gouvães_hydroelectric_plant	L603201	G603236	ES0144580Y14	1	220	220	2	2062	2102	2142	0	0	220	220	220	220	220	220	220	220	220	220
hydropower	Spain	Europe	Southern Europe	José María Oriol hydroelectric plant			Alcántara II, Jose M Oriol Grupo 4	957	operating	1969		conventional storage				TRUE	FALSE	Iberdrola		39.7291	-6.8854	exact		Tajo-Salor	Cáceres	Extremadura	https://gem.wiki/José_María_Oriol_hydroelectric_plant	L603369	G603404	ES0144580Y14	1	957	957	55	2009	2049	2089	957	957	957	957	957	957	957	957	957	957	957	957
hydropower	Spain	Europe	Southern Europe	La Muela I hydroelectric plant			La Muela	635	operating	1989		pumped storage				TRUE	FALSE	Iberdrola		39.2628	-0.9192	exact			Valencia	Valencian Community	https://gem.wiki/La_Muela_I_hydroelectric_plant	L603370	G603405	ES0144580Y14	1	635	635	35	2029	2069	2109	635	635	635	635	635	635	635	635	635	635	635	635
hydropower	Spain	Europe	Southern Europe	Puente Bibey hydroelectric plant			Puente Bibey 4	315	operating	1960		unknown				TRUE	FALSE	Iberdrola		42.3342	-7.2152	exact		Terra de Trives		Galicia	https://gem.wiki/Puente_Bibey_hydroelectric_plant	L603380	G603415	ES0144580Y14	1	315	315	64	2000	2040	2080	315	315	315	315	315	315	315	315	315	315	315	315
hydropower	Spain	Europe	Southern Europe	Ricobayo I hydroelectric plant			Ricobayo (Esla)	175	operating	1934		conventional storage				TRUE	FALSE	Iberdrola		41.5284	-5.9867	exact			Zamora	Castile and León	https://gem.wiki/Ricobayo_I_hydroelectric_plant	L603382	G603417	ES0144580Y14	1	175	175	90	1974	2014	2054	175	175	175	175	175	175	175	175	175	175	175	175
hydropower	Spain	Europe	Southern Europe	Ricobayo II hydroelectric plant				154	operating	1998		conventional storage				TRUE	FALSE	Iberdrola		41.5284	-5.9867	exact			Zamora	Castile and León	https://gem.wiki/Ricobayo_II_hydroelectric_plant	L603383	G603418	ES0144580Y14	1	154	154	26	2038	2078	2118	154	154	154	154	154	154	154	154	154	154	154	154
hydropower	Spain	Europe	Southern Europe	San Esteban hydroelectric plant			Santo Estavo I	263	operating	1957		conventional storage				TRUE	FALSE	Iberdrola		42.4143	-7.6534	exact	Nogueira de Ramuín	Ourense		Galicia	https://gem.wiki/San_Esteban_hydroelectric_plant	L603385	G603420	ES0144580Y14	1	263	263	67	1997	2037	2077	263	263	263	263	263	263	263	263	263	263	263	263
hydropower	Spain	Europe	Southern Europe	San Esteban II hydroelectric plant			Santo Estavo II, San Esteban II Grupo 1	188	operating	2012		conventional storage				TRUE	FALSE	Iberdrola		42.4143	-7.6534	exact	Nogueira de Ramuín	Ourense		Galicia	https://gem.wiki/San_Esteban_II_hydroelectric_plant	L603386	G603421	ES0144580Y14	1	188	188	12	2052	2092	2132	188	188	188	188	188	188	188	188	188	188	188	188
hydropower	Spain	Europe	Southern Europe	Saucelle hydroelectric plant				251	operating	1956		conventional storage				TRUE	FALSE	Iberdrola		41.0449	-6.8071	exact			Salamanca	Castile and León	https://gem.wiki/Saucelle_hydroelectric_plant	L604105	G604144	ES0144580Y14	1	251	251	68	1996	2036	2076	251	251	251	251	251	251	251	251	251	251	251	251
hydropower	Spain	Europe	Southern Europe	Saucelle II hydroelectric plant				269	operating	1985		conventional storage				TRUE	FALSE	Iberdrola		41.0449	-6.8071	exact			Salamanca	Castile and León	https://gem.wiki/Saucelle_II_hydroelectric_plant	L604106	G604145	ES0144580Y14	1	269	269	39	2025	2065	2105	269	269	269	269	269	269	269	269	269	269	269	269
hydropower	Spain	Europe	Southern Europe	Soutelo hydroelectric plant			Soutelo 2	215	operating			pumped storage				TRUE	FALSE	Iberdrola		42.1543	-7.1887	exact		Viana		Galicia	https://gem.wiki/Soutelo_hydroelectric_plant	L603388	G603423	ES0144580Y14	1	215	215	-99	40	80	120	215	215	215	215	215	215	215	215	215	215	215	215
hydropower	Spain	Europe	Southern Europe	Torrejón hydroelectric plant			Torrejon 1	132	operating			pumped storage				TRUE	FALSE	Iberdrola		39.8356	-5.989	exact		Campo Arañuelo	Cáceres	Extremadura	https://gem.wiki/Torrejón_hydroelectric_plant	L603394	G603429	ES0144580Y14	1	132	132	-99	40	80	120	132	132	132	132	132	132	132	132	132	132	132	132
hydropower	Spain	Europe	Southern Europe	Valdecañas hydroelectric plant			Valdecanas 3	249	operating	1964		pumped storage				TRUE	FALSE	Iberdrola		39.7785	-5.612	exact		Campo Arañuelo	Cáceres	Extremadura	https://gem.wiki/Valdecañas_hydroelectric_plant	L603395	G603430	ES0144580Y14	1	249	249	60	2004	2044	2084	249	249	249	249	249	249	249	249	249	249	249	249
hydropower	Spain	Europe	Southern Europe	Villacampo hydroelectric plant				218	operating	1949		conventional storage				TRUE	FALSE	Iberdrola		41.4911	-6.0853	exact			Zamora	Castile and León	https://gem.wiki/Villacampo_hydroelectric_plant	L603398	G603433	ES0144580Y14	1	218	218	75	1989	2029	2069	218	218	218	218	218	218	218	218	218	218	218	218
hydropower	Spain	Europe	Southern Europe	Villarino hydroelectric plant			Villarino 4	810	operating	1970		pumped storage				TRUE	FALSE	Iberdrola		41.255	-6.4874	exact			Salamanca	Castile and León	https://gem.wiki/Villarino_hydroelectric_plant	L603399	G603434	ES0144580Y14	1	810	810	54	2010	2050	2090	810	810	810	810	810	810	810	810	810	810	810	810
nuclear	Spain	Europe	Southern Europe	Almaraz nuclear power plant	1			1049	operating	1983		pressurized water reactor						Iberdrola; Endesa; Gas Natural		39.807	-5.6986	exact		Campo Arañuelo	Cáceres	Extremadura	https://gem.wiki/Almaraz_nuclear_power_plant	L500113	G500239	ES0144580Y14	0.333333	2093		41	2023	2063	2103	349.667	349.667	349.667	349.667	349.667	349.667	349.667	349.667	349.667	349.667	349.667	349.667
nuclear	Spain	Europe	Southern Europe	Almaraz nuclear power plant	2			1044	operating	1984		pressurized water reactor						Iberdrola; Endesa; Gas Natural		39.807	-5.6986	exact		Campo Arañuelo	Cáceres	Extremadura	https://gem.wiki/Almaraz_nuclear_power_plant	L500113	G500240	ES0144580Y14	0.333333	2093	2093	40	2024	2064	2104	348	348	348	348	348	348	348	348	348	348	348	348
nuclear	Spain	Europe	Southern Europe	Ascó nuclear power plant	2			1027	operating	1986		pressurized water reactor						Endesa; Iberdrola		41.1993	0.5694	exact		Ribera d'Ebre	Tarragona	Catalonia	https://gem.wiki/Ascó_nuclear_power_plant	L500115	G500243	ES0144580Y14	0.5	1027	1027	38	2026	2066	2106	513.5	513.5	513.5	513.5	513.5	513.5	513.5	513.5	513.5	513.5	513.5	513.5
nuclear	Spain	Europe	Southern Europe	Cofrentes nuclear power plant				1102	operating	1985		boiling water reactor						Iberdrola SA		39.2134	-1.0509	exact			Valencia	Valencian Community	https://gem.wiki/Cofrentes_nuclear_power_plant	L500081	G500149	ES0144580Y14	1	1102	1102	39	2025	2065	2105	1102	1102	1102	1102	1102	1102	1102	1102	1102	1102	1102	1102
nuclear	Spain	Europe	Southern Europe	Trillo nuclear power plant	1			1066	operating	1988		pressurized water reactor						Iberdrola; Gas Natural; Hidroeléctrica del Cantábrico; Nuclenor		40.7016	-2.6227	exact			Guadalajara	Castile-La Mancha	https://gem.wiki/Trillo_nuclear_power_plant	L500105	G500202	ES0144580Y14	0.25	1066	1066	36	2028	2068	2108	266.5	266.5	266.5	266.5	266.5	266.5	266.5	266.5	266.5	266.5	266.5	266.5
nuclear	Spain	Europe	Southern Europe	Vandellos nuclear power plant	2			1087	operating	1988		pressurized water reactor						Endesa; Iberdrola		40.9511	0.8662	exact	Vandellòs i l'Hospitalet de l'Infant	Baix Camp	Tarragona	Catalonia	https://gem.wiki/Vandellos_nuclear_power_plant	L500114	G500241	ES0144580Y14	0.5	1087	1087	36	2028	2068	2108	543.5	543.5	543.5	543.5	543.5	543.5	543.5	543.5	543.5	543.5	543.5	543.5
solar	Spain	Europe	Southern Europe	Alcarria solar farm				40	construction			PV						Iberdrola SA		39.6196	-2.7904	approximate			Cuenca	Castile-La Mancha	https://gem.wiki/Alcarria_solar_farm	L824304	G827413	ES0144580Y14	1	40	40	-99	40	80	120	0	0	0	0	0	0	0	40	40	40	40	40
solar	Portugal	Europe	Southern Europe	Alcochete solar farm	1			32.9	pre-construction			PV						Iberdrola SA		38.7056	-8.8517	approximate		Setúbal			https://gem.wiki/Alcochete_solar_farm	L824084	G827155	ES0144580Y14	1	45.6		-99	40	80	120	0	0	0	0	0	0	0	0	0	0	0	0
solar	Portugal	Europe	Southern Europe	Alcochete solar farm	2			12.7	pre-construction			PV						Iberdrola SA		38.7056	-8.8517	approximate		Setúbal			https://gem.wiki/Alcochete_solar_farm	L824084	G827156	ES0144580Y14	1	45.6	45.6	-99	40	80	120	0	0	0	0	0	0	0	0	0	0	0	0
solar	Portugal	Europe	Southern Europe	Algeruz solar farm	2			27.4	operating	2022		PV						Iberdrola SA		38.5792	-8.8435	approximate		Setúbal			https://gem.wiki/Algeruz_solar_farm	L824087	G827160	ES0144580Y14	1	27.4	27.4	2	2062	2102	2142	0	0	27.4	27.4	27.4	27.4	27.4	27.4	27.4	27.4	27.4	27.4
solar	Spain	Europe	Southern Europe	Almaraz solar farm	1			42.6	operating	2022		PV						Iberdrola SA		39.7867	-5.7003	approximate		Campo Arañuelo	Cáceres	Extremadura	https://gem.wiki/Almaraz_solar_farm	L824320	G827431	ES0144580Y14	1	85.2		2	2062	2102	2142	0	0	42.6	42.6	42.6	42.6	42.6	42.6	42.6	42.6	42.6	42.6
solar	Spain	Europe	Southern Europe	Almaraz solar farm	2			42.6	operating	2022		PV						Iberdrola SA		39.7867	-5.7003	approximate		Campo Arañuelo	Cáceres	Extremadura	https://gem.wiki/Almaraz_solar_farm	L824320	G827432	ES0144580Y14	1	85.2	85.2	2	2062	2102	2142	0	0	42.6	42.6	42.6	42.6	42.6	42.6	42.6	42.6	42.6	42.6
solar	Spain	Europe	Southern Europe	Andévalo solar farm	1			50	operating	2020		PV						Iberdrola SA		37.6102	-7.2453	approximate	Puebla de Guzmán	Andévalo		Huelva	https://gem.wiki/Andévalo_solar_farm	L805876	G806761	ES0144580Y14	1	50	50	4	2060	2100	2140	50	50	50	50	50	50	50	50	50	50	50	50
solar	Spain	Europe	Southern Europe	Arenales (Iberdrola) solar farm	1			150	operating	2021		PV						Iberdrola SA		39.4578	-6.4421	approximate	Caceres			Caceres	https://gem.wiki/Arenales_(Iberdrola)_solar_farm	L805877	G806762	ES0144580Y14	1	150	150	3	2061	2101	2141	0	150	150	150	150	150	150	150	150	150	150	150
solar	Australia	Oceania	Australia and New Zealand	Avonlie Solar				245	construction	2023		PV						Iberdrola SA		-34.9183	146.609	exact				New South Wales	https://gem.wiki/Avonlie_Solar	L805593	G806435	ES0144580Y14	1	245	245	1	2063	2103	2143	0	0	0	245	245	245	245	245	245	245	245	245
solar	Spain	Europe	Southern Europe	Ayamonte Hybrid solar farm				57.6	announced			PV						Iberdrola SA		37.2148	-7.4001	approximate		Ayamonte			https://gem.wiki/Ayamonte_Hybrid_solar_farm	L824369	G827486	ES0144580Y14	1	57.6	57.6	-99	40	80	120	0	0	0	0	0	0	0	0	0	0	0	0
solar	Spain	Europe	Southern Europe	Azaila solar farm	1			50	operating	2021		PV						Iberdrola SA		41.2641	-0.452	exact	Azaila			Teruel	https://gem.wiki/Azaila_solar_farm	L805863	G806745	ES0144580Y14	1	50		3	2061	2101	2141	0	50	50	50	50	50	50	50	50	50	50	50
solar	Spain	Europe	Southern Europe	Barcience solar farm	1			50	operating	2021		PV						Iberdrola SA		39.938	-4.0315	approximate	Bargas			Toledo	https://gem.wiki/Barcience_solar_farm	L805878	G806763	ES0144580Y14	1	50	50	3	2061	2101	2141	0	50	50	50	50	50	50	50	50	50	50	50
solar	Spain	Europe	Southern Europe	Biar solar farm				45.5	pre-construction			PV						Iberdrola SA		38.3516	-0.49	approximate	Alicante		Alacant / Alicante	Valencian Community	https://gem.wiki/Biar_solar_farm	L824385	G827509	ES0144580Y14	1	45.5	45.5	-99	40	80	120	0	0	0	0	0	0	0	0	0	0	0	0
solar	Australia	Oceania	Australia and New Zealand	Broadsound solar farm				385	pre-construction			PV						Iberdrola SA		-22.8114	149.389	exact				Queensland	https://gem.wiki/Broadsound_solar_farm	L805588	G806430	ES0144580Y14	1	385	385	-99	40	80	120	0	0	0	0	0	0	0	0	0	0	0	0
solar	Spain	Europe	Southern Europe	Campo Arañuelo solar farm	1		Arañuelo I	50	operating	2021		PV						Iberdrola SA		39.8161	-5.6831	approximate	Almaraz			Cáceres	https://gem.wiki/Campo_Arañuelo_solar_farm	L805864	G806746	ES0144580Y14	1	140		3	2061	2101	2141	0	50	50	50	50	50	50	50	50	50	50	50
solar	Spain	Europe	Southern Europe	Campo Arañuelo solar farm	2		Arañuelo II	50	operating	2021		PV						Iberdrola SA		39.8161	-5.6831	approximate	Almaraz			Cáceres	https://gem.wiki/Campo_Arañuelo_solar_farm	L805864	G806747	ES0144580Y14	1	140		3	2061	2101	2141	0	50	50	50	50	50	50	50	50	50	50	50
solar	Spain	Europe	Southern Europe	Campo Arañuelo solar farm	3		Arañuelo III	40	operating	2021		PV						Iberdrola SA		39.7865	-5.7008	exact	Romangordo			Cáceres	https://gem.wiki/Campo_Arañuelo_solar_farm	L805864	G806749	ES0144580Y14	1	140	140	3	2061	2101	2141	0	40	40	40	40	40	40	40	40	40	40	40
solar	Portugal	Europe	Southern Europe	Carregado solar farm				64	construction			PV						Iberdrola SA		39.0237	-8.9646	approximate		Lisbon			https://gem.wiki/Carregado_solar_farm	L824113	G827190	ES0144580Y14	1	64	64	-99	40	80	120	0	0	0	0	0	0	0	64	64	64	64	64
solar	Spain	Europe	Southern Europe	Cartagena solar farm	1		SABIC Cartagena	100	announced			PV						Iberdrola SA		37.7063	-1.1009	exact	Cartagena	Campo de Cartagena y Mar Menor	Region of Murcia	Region of Murcia	https://gem.wiki/Cartagena_solar_farm	L805874	G806759	ES0144580Y14	1	100	100	-99	40	80	120	0	0	0	0	0	0	0	0	0	0	0	0
solar	Spain	Europe	Southern Europe	Ceclavín solar farm	1			328	operating	2021		PV						Iberdrola SA		39.8201	-6.7798	approximate	Ceclavín			Cáceres	https://gem.wiki/Ceclavín_solar_farm	L805865	G806748	ES0144580Y14	1	328	328	3	2061	2101	2141	0	328	328	328	328	328	328	328	328	328	328	328
solar	Spain	Europe	Southern Europe	Cedillo solar farm				374.9	pre-construction			PV						Iberdrola SA		39.6509	-7.4983	approximate		Valencia de Alcántara	Cáceres	Extremadura	https://gem.wiki/Cedillo_solar_farm	L824445	G827588	ES0144580Y14	1	374.9	374.9	-99	40	80	120	0	0	0	0	0	0	0	0	0	0	0	0
solar	Spain	Europe	Southern Europe	Cespedera solar farm				27	pre-construction			PV						Iberdrola SA		36.52	-6.2808	approximate	Cadiz				https://gem.wiki/Cespedera_solar_farm	L824454	G827599	ES0144580Y14	1	27	27	-99	40	80	120	0	0	0	0	0	0	0	0	0	0	0	0
solar	Spain	Europe	Southern Europe	Ciudad Rodrigo solar farm	1		Ciudad Rodrigo PV	318	construction			PV						Iberdrola SA		40.603	-6.5214	approximate	Ciudad Rodrigo			Salamanca	https://gem.wiki/Ciudad_Rodrigo_solar_farm	L805866	G806750	ES0144580Y14	1	318	318	-99	40	80	120	0	0	0	0	0	0	0	318	318	318	318	318
solar	Portugal	Europe	Southern Europe	Conde solar farm				14	pre-construction			PV						Iberdrola SA		39.678	-8.1983	approximate		Castelo Branco			https://gem.wiki/Conde_solar_farm	L824126	G827204	ES0144580Y14	1	14	14	-99	40	80	120	0	0	0	0	0	0	0	0	0	0	0	0
solar	Mexico	Americas	Latin America and the Caribbean	Cuyoaco solar farm		Planta Solar Cuyoaco		220.8	operating	2020		PV						Iberdrola México		19.5848	-97.5922	exact		Cuyoaco		Puebla	https://gem.wiki/Cuyoaco_solar_farm	L807277	G808631	ES0144580Y14	1	220.8	220.8	4	2060	2100	2140	220.8	220.8	220.8	220.8	220.8	220.8	220.8	220.8	220.8	220.8	220.8	220.8
solar	Spain	Europe	Southern Europe	El Almendro solar farm				33.3	announced			PV						Iberdrola SA		37.506	-7.2717	approximate		El Andévalo	Huelva	Andalusia	https://gem.wiki/El_Almendro_solar_farm	L824499	G827655	ES0144580Y14	1	33.3	33.3	-99	40	80	120	0	0	0	0	0	0	0	0	0	0	0	0
solar	Spain	Europe	Southern Europe	El Romeral solar farm	1			42	operating	2022		PV						Iberdrola SA		39.5687	-2.0884	approximate	Alarcón			Cuenca	https://gem.wiki/El_Romeral_solar_farm	L805871	G806755	ES0144580Y14	1	42	42	2	2062	2102	2142	0	0	42	42	42	42	42	42	42	42	42	42
solar	Portugal	Europe	Southern Europe	Estoi solar farm				83	pre-construction	2024		PV						Iberdrola SA		37.0948	-7.8896	approximate	Faro	Faro			https://gem.wiki/Estoi_solar_farm	L824136	G827214	ES0144580Y14	1	83	83	0	2064	2104	2144	0	0	0	0	0	0	0	0	0	0	0	0
solar	Portugal	Europe	Southern Europe	Fernando Pessoa solar farm				1200	pre-construction	2025		PV						Iberdrola SA; Prosolia INC		37.9851	-8.7751	approximate	Santiago do Cacém	Sines			https://gem.wiki/Fernando_Pessoa_solar_farm	L824141	G827219	ES0144580Y14	0.5	1200	1200	-1	2065	2105	2145	0	0	0	0	0	0	0	0	0	0	0	0
solar	Spain	Europe	Southern Europe	Francisco Pizarro solar farm	1			590	operating	2022		PV						Iberdrola SA		39.5731	-5.7051	approximate	Torrecillas de la Tiesa			Cáceres	https://gem.wiki/Francisco_Pizarro_solar_farm	L805867	G806751	ES0144580Y14	1	590	590	2	2062	2102	2142	0	0	590	590	590	590	590	590	590	590	590	590
solar	Spain	Europe	Southern Europe	Fuendetodos solar farm				124.9	pre-construction			PV						Iberdrola SA		41.3454	-0.9952	approximate		Campo de Belchite		Aragon	https://gem.wiki/Fuendetodos_solar_farm	L824549	G827719	ES0144580Y14	1	124.9	124.9	-99	40	80	120	0	0	0	0	0	0	0	0	0	0	0	0
solar	Spain	Europe	Southern Europe	Fuentes solar farm				50	construction			PV						Iberdrola SA		39.9442	-2.0069	approximate	Fuentes				https://gem.wiki/Fuentes_solar_farm	L824551	G827721	ES0144580Y14	1	50		-99	40	80	120	0	0	0	0	0	0	0	50	50	50	50	50
solar	Spain	Europe	Southern Europe	FV Alhorines solar farm	1			50	pre-construction			PV						Iberdrola SA		38.7624	-0.9537	approximate	La Encina	Vilena		Alicante	https://gem.wiki/FV_Alhorines_solar_farm	L805868	G806752	ES0144580Y14	1	50	50	-99	40	80	120	0	0	0	0	0	0	0	0	0	0	0	0
solar	Spain	Europe	Southern Europe	FV Cofrentes solar farm	1		FV Cofrentes 1	200	pre-construction			PV						Iberdrola SA		39.2238	-1.0591	approximate	Cofrentes			Valencia	https://gem.wiki/FV_Cofrentes_solar_farm	L805870	G806754	ES0144580Y14	1	200	200	-99	40	80	120	0	0	0	0	0	0	0	0	0	0	0	0
solar	Spain	Europe	Southern Europe	Guillena solar farm				144	construction			PV						Iberdrola SA		37.3803	-5.9602	approximate	Seville				https://gem.wiki/Guillena_solar_farm	L824582	G827761	ES0144580Y14	1	144	144	-99	40	80	120	0	0	0	0	0	0	0	144	144	144	144	144
solar	Mexico	Americas	Latin America and the Caribbean	Hermosillo PV Solar Park		Parque Fotovoltaico Hermosillo		100	operating	2018		PV						Iberdrola SA		28.9622	-111.503	exact		Hermosillo		Sonora	https://gem.wiki/Hermosillo_PV_Solar_Park	L807279	G808633	ES0144580Y14	1	100	100	6	2058	2098	2138	100	100	100	100	100	100	100	100	100	100	100	100
solar	Spain	Europe	Southern Europe	Ibersol Ciudad Real CSP solar farm			Puertollano Solar Thermal, Ence Termollano	50	operating	2009		Solar Thermal						Iberdrola SA [90%]; IDAE (Instituto para la Diversificación y el Ahorro de la Energía) [10%]		38.6433	-3.975	exact		Campo de Calatrava	Ciudad Real	Castile-La Mancha	https://gem.wiki/Ibersol_Ciudad_Real_CSP_solar_farm	L824610	G827804	ES0144580Y14	0.9	50	50	15	2049	2089	2129	45	45	45	45	45	45	45	45	45	45	45	45
solar	Mexico	Americas	Latin America and the Caribbean	Laborcilla solar farm		Planta Solar Laborcilla		585	construction			PV						Iberdrola		22.763	-102.582	approximate				Zacatecas	https://gem.wiki/Laborcilla_solar_farm	L832540	G838104	ES0144580Y14	1	585	585	-99	40	80	120	0	0	0	0	0	0	0	585	585	585	585	585
solar	Spain	Europe	Southern Europe	Majada Alta solar farm				50	construction	2024		PV						Iberdrola SA		39.6511	-7.4991	approximate	Cedillo			Extremadura	https://gem.wiki/Majada_Alta_solar_farm	L824704	G827905	ES0144580Y14	1	50	50	0	2064	2104	2144	0	0	0	0	50	50	50	50	50	50	50	50
solar	Spain	Europe	Southern Europe	Manantiales solar farm				30	construction			PV						Iberdrola SA		40.6341	-3.1717	approximate	Guadalajara				https://gem.wiki/Manantiales_solar_farm	L824709	G827910	ES0144580Y14	1	30	30	-99	40	80	120	0	0	0	0	0	0	0	30	30	30	30	30
solar	Portugal	Europe	Southern Europe	Montechoro solar farm	2			25	construction			PV						Iberdrola SA		37.1006	-8.2281	approximate	Albufeira	Faro			https://gem.wiki/Montechoro_solar_farm	L824175	G827266	ES0144580Y14	1	36.6		-99	40	80	120	0	0	0	0	0	0	0	25	25	25	25	25
solar	Portugal	Europe	Southern Europe	Montechoro solar farm	1			11.6	construction			PV						Iberdrola SA		37.1006	-8.2281	approximate	Albufeira	Faro			https://gem.wiki/Montechoro_solar_farm	L824175	G827265	ES0144580Y14	1	36.6	36.6	-99	40	80	120	0	0	0	0	0	0	0	11.6	11.6	11.6	11.6	11.6
solar	Spain	Europe	Southern Europe	Morón de Almazán Hybrid solar farm				49.5	pre-construction			PV						Iberdrola SA		41.3892	-2.4272	exact			Soria	Castile and León	https://gem.wiki/Morón_de_Almazán_Hybrid_solar_farm	L824743	G827951	ES0144580Y14	1	49.5	49.5	-99	40	80	120	0	0	0	0	0	0	0	0	0	0	0	0
solar	Spain	Europe	Southern Europe	Núñez De Balboa solar farm	1			500	operating	2020		PV						Iberdrola SA		38.4533	-6.226	exact		Tierra de Barros	Badajoz	Extremadura	https://gem.wiki/Núñez_De_Balboa_solar_farm	L805862	G806744	ES0144580Y14	1	500	500	4	2060	2100	2140	500	500	500	500	500	500	500	500	500	500	500	500
solar	Spain	Europe	Southern Europe	Olmedilla solar farm	1		Iberdrola Olmedilla	42	operating	2022		PV						Iberdrola SA		39.6153	-2.1077	approximate	Olmedilla de Alarcón			Cuenca	https://gem.wiki/Olmedilla_solar_farm	L805879	G806764	ES0144580Y14	1	42	42	2	2062	2102	2142	0	0	42	42	42	42	42	42	42	42	42	42
solar	Spain	Europe	Southern Europe	Oriol solar farm				273.3	pre-construction			PV						Iberdrola SA		39.8221	-6.7734	approximate	Ceclavín				https://gem.wiki/Oriol_solar_farm	L824778	G827997	ES0144580Y14	1	273.3	273.3	-99	40	80	120	0	0	0	0	0	0	0	0	0	0	0	0
solar	Spain	Europe	Southern Europe	Otero solar farm			Otero Segovia	505	pre-construction			PV						Iberdrola SA		40.9796	-4.3668	approximate			Segovia	Castile and León	https://gem.wiki/Otero_solar_farm	L824782	G828002	ES0144580Y14	1	505	505	-99	40	80	120	0	0	0	0	0	0	0	0	0	0	0	0
solar	Spain	Europe	Southern Europe	Peñaflor (Iberdrola) solar farm				136.5	pre-construction			PV						Iberdrola SA		41.6791	-0.6937	approximate		Zaragoza		Aragon	https://gem.wiki/Peñaflor_(Iberdrola)_solar_farm	L824793	G828015	ES0144580Y14	1	136.5	136.5	-99	40	80	120	0	0	0	0	0	0	0	0	0	0	0	0
solar	Spain	Europe	Southern Europe	Peñarrubia solar farm				50	construction			PV						Iberdrola SA		43.2591	-4.5842	approximate	Peñarrubia				https://gem.wiki/Peñarrubia_solar_farm	L824796	G828019	ES0144580Y14	1	50	50	-99	40	80	120	0	0	0	0	0	0	0	50	50	50	50	50
solar	Spain	Europe	Southern Europe	Peralta solar farm				370	pre-construction			PV						Iberdrola		42.3358	-1.8117	approximate		Erriberagoiena / Ribera Alta	Navarre	Navarre	https://gem.wiki/Peralta_solar_farm	L824798	G828021	ES0144580Y14	1	370	370	-99	40	80	120	0	0	0	0	0	0	0	0	0	0	0	0
solar	Australia	Oceania	Australia and New Zealand	Port Augusta Renewable Energy Park solar farm				107	operating	2021		PV						Iberdrola SA		-32.4909	137.764	approximate	Port Augusta			South Australia	https://gem.wiki/Port_Augusta_Renewable_Energy_Park_solar_farm	L805594	G806436	ES0144580Y14	1	107	107	3	2061	2101	2141	0	107	107	107	107	107	107	107	107	107	107	107
solar	Spain	Europe	Southern Europe	PSF Ayora solar farm	1		PSF Ayora 1	200	pre-construction			PV						Iberdrola SA		39.2313	-1.0535	approximate	Cofrentes			Valencia	https://gem.wiki/PSF_Ayora_solar_farm	L805869	G806753	ES0144580Y14	1	200	200	-99	40	80	120	0	0	0	0	0	0	0	0	0	0	0	0
solar	Spain	Europe	Southern Europe	Puertollano Green Hydrogen Solar Plant	1			120	operating	2022		PV						Iberdrola SA		38.6927	-4.097	approximate	Puertollano			Ciudad Real	https://gem.wiki/Puertollano_Green_Hydrogen_Solar_Plant	L805875	G806760	ES0144580Y14	1	120	120	2	2062	2102	2142	0	0	120	120	120	120	120	120	120	120	120	120
solar	Spain	Europe	Southern Europe	Radona 1 Hybrid solar farm				24	pre-construction			PV						Iberdrola SA		41.2956	-2.4713	exact			Soria	Castile and León	https://gem.wiki/Radona_1_Hybrid_solar_farm	L824824	G828051	ES0144580Y14	1	24	24	-99	40	80	120	0	0	0	0	0	0	0	0	0	0	0	0
solar	Spain	Europe	Southern Europe	Radona 2 Hybrid solar farm				31.5	pre-construction			PV						Iberdrola SA		41.2956	-2.4713	exact			Soria	Castile and León	https://gem.wiki/Radona_2_Hybrid_solar_farm	L824825	G828052	ES0144580Y14	1	31.5	31.5	-99	40	80	120	0	0	0	0	0	0	0	0	0	0	0	0
solar	Spain	Europe	Southern Europe	Revilla-Vallejera solar farm				50	operating	2022		PV						Iberdrola SA		42.1462	-4.1598	exact			Burgos	Castile and León	https://gem.wiki/Revilla-Vallejera_solar_farm	L824831	G828058	ES0144580Y14	1	50	50	2	2062	2102	2142	0	0	50	50	50	50	50	50	50	50	50	50
solar	Spain	Europe	Southern Europe	Rivera solar farm				419.9	pre-construction	2024		PV						Iberdrola SA		37.3835	-6.8368	approximate		El Condado	Huelva	Andalusia	https://gem.wiki/Rivera_solar_farm	L824835	G828065	ES0144580Y14	1	419.9	419.9	0	2064	2104	2144	0	0	0	0	0	0	0	0	0	0	0	0
solar	Spain	Europe	Southern Europe	San Antonio (Iberdrola) solar farm				50	construction			PV						Iberdrola SA		39.6511	-7.4991	approximate	Cedillo				https://gem.wiki/San_Antonio_(Iberdrola)_solar_farm	L824848	G828086	ES0144580Y14	1	50	50	-99	40	80	120	0	0	0	0	0	0	0	50	50	50	50	50
solar	Mexico	Americas	Latin America and the Caribbean	Santiago Arriaga PV Solar Park		Parque Solar Fotovoltaico Santiago Arriaga	Parque Fotovoltaico San Luis Potosí	200	operating	2018		PV						Iberdrola SA		21.886	-101.23	exact			Villa de Arriaga	San Luis Potosí	https://gem.wiki/Santiago_Arriaga_PV_Solar_Park	L807280	G808634	ES0144580Y14	1	200	200	6	2058	2098	2138	200	200	200	200	200	200	200	200	200	200	200	200
solar	Portugal	Europe	Southern Europe	Santiago Do Cacem solar farm	1			285	pre-construction	2025		PV						Iberdrola SA [50%]; Prosolia INC [50%]		38.7155	-9.1234	approximate	Satiago do Caem			Lisbon	https://gem.wiki/Santiago_Do_Cacem_solar_farm	L806469	G807420	ES0144580Y14	0.5	1140		-1	2065	2105	2145	0	0	0	0	0	0	0	0	0	0	0	0
solar	Portugal	Europe	Southern Europe	Santiago Do Cacem solar farm	2			285	pre-construction	2025		PV						Iberdrola SA [50%]; Prosolia INC [50%]		38.7155	-9.1234	approximate	Satiago do Caem			Lisbon	https://gem.wiki/Santiago_Do_Cacem_solar_farm	L806469	G807421	ES0144580Y14	0.5	1140		-1	2065	2105	2145	0	0	0	0	0	0	0	0	0	0	0	0
solar	Portugal	Europe	Southern Europe	Santiago Do Cacem solar farm	3			285	pre-construction	2025		PV						Iberdrola SA [50%]; Prosolia INC [50%]		38.7155	-9.1234	approximate	Satiago do Caem			Lisbon	https://gem.wiki/Santiago_Do_Cacem_solar_farm	L806469	G807422	ES0144580Y14	0.5	1140		-1	2065	2105	2145	0	0	0	0	0	0	0	0	0	0	0	0
solar	Portugal	Europe	Southern Europe	Santiago Do Cacem solar farm	4			285	pre-construction	2025		PV						Iberdrola SA [50%]; Prosolia INC [50%]		38.7155	-9.1234	approximate	Satiago do Caem			Lisbon	https://gem.wiki/Santiago_Do_Cacem_solar_farm	L806469	G807423	ES0144580Y14	0.5	1140	1140	-1	2065	2105	2145	0	0	0	0	0	0	0	0	0	0	0	0
solar	Spain	Europe	Southern Europe	Tagus solar farm	1		Tagus Complex	95	construction	2023		PV						Iberdrola SA		39.6511	-7.4991	approximate	Cedillo				https://gem.wiki/Tagus_solar_farm	L824884	G828131	ES0144580Y14	1	380		1	2063	2103	2143	0	0	0	95	95	95	95	95	95	95	95	95
solar	Spain	Europe	Southern Europe	Tagus solar farm	2		Tagus Complex	95	construction	2023		PV						Iberdrola SA		39.6511	-7.4991	approximate	Cedillo				https://gem.wiki/Tagus_solar_farm	L824884	G828132	ES0144580Y14	1	380		1	2063	2103	2143	0	0	0	95	95	95	95	95	95	95	95	95
solar	Spain	Europe	Southern Europe	Tagus solar farm	3		Tagus Complex	95	construction	2023		PV						Iberdrola SA		39.6511	-7.4991	approximate	Cedillo				https://gem.wiki/Tagus_solar_farm	L824884	G828133	ES0144580Y14	1	380		1	2063	2103	2143	0	0	0	95	95	95	95	95	95	95	95	95
solar	Spain	Europe	Southern Europe	Tagus solar farm	4		Tagus Complex	95	construction	2023		PV						Iberdrola SA		39.6511	-7.4991	approximate	Cedillo				https://gem.wiki/Tagus_solar_farm	L824884	G828134	ES0144580Y14	1	380	380	1	2063	2103	2143	0	0	0	95	95	95	95	95	95	95	95	95
solar	Spain	Europe	Southern Europe	Valbuena solar farm				50	construction			PV						Iberdrola SA		40.6341	-3.1717	approximate	Guadalajara				https://gem.wiki/Valbuena_solar_farm	L824922	G828181	ES0144580Y14	1	50	50	-99	40	80	120	0	0	0	0	0	0	0	50	50	50	50	50
solar	Spain	Europe	Southern Europe	Vara del Rey solar farm				49.5	announced			PV						Iberdrola SA		39.4219	-2.2993	approximate			Cuenca	Castile-La Mancha	https://gem.wiki/Vara_del_Rey_solar_farm	L824939	G828200	ES0144580Y14	1	49.5	49.5	-99	40	80	120	0	0	0	0	0	0	0	0	0	0	0	0
solar	Spain	Europe	Southern Europe	Velilla PV solar farm	1		Velilla Solar	400	construction	2023		PV						Iberdrola SA		42.8181	-4.8536	exact	Velilla del Río Carrión		Palencia	Castile and León	https://gem.wiki/Velilla_PV_solar_farm	L805872	G806756	ES0144580Y14	1	400	400	1	2063	2103	2143	0	0	0	400	400	400	400	400	400	400	400	400
solar	Spain	Europe	Southern Europe	Villalba de Guardo (Iberdrola) solar farm			Iberdrola Palencia	350	construction			PV						Iberdrola SA		42.7216	-4.8233	approximate			Palencia	Castile and León	https://gem.wiki/Villalba_de_Guardo_(Iberdrola)_solar_farm	L824943	G828204	ES0144580Y14	1	350	350	-99	40	80	120	0	0	0	0	0	0	0	350	350	350	350	350
solar	Spain	Europe	Southern Europe	Villarino solar farm	1			191	construction			PV						Iberdrola SA		41.2732	-6.4623	approximate	Villarino de los Aires			Salamanca	https://gem.wiki/Villarino_solar_farm	L805873	G806757	ES0144580Y14	1	241		-99	40	80	120	0	0	0	0	0	0	0	191	191	191	191	191
solar	Spain	Europe	Southern Europe	Villarino solar farm	2			50	construction			PV						Iberdrola SA		41.2732	-6.4623	approximate	Villarino de los Aires			Salamanca	https://gem.wiki/Villarino_solar_farm	L805873	G806758	ES0144580Y14	1	241	241	-99	40	80	120	0	0	0	0	0	0	0	50	50	50	50	50
solar	Spain	Europe	Southern Europe	Virgen de Aremos 3 solar farm				50	construction			PV						Iberdrola SA		42.0049	-4.5261	approximate	Palencia				https://gem.wiki/Virgen_de_Aremos_3_solar_farm	L824952	G828218	ES0144580Y14	1	50		-99	40	80	120	0	0	0	0	0	0	0	50	50	50	50	50
solar	Spain	Europe	Southern Europe	Virgen de Areños solar farm				50	construction			PV						Iberdrola SA		41.9826	-4.7806	approximate			Palencia	Castile and León	https://gem.wiki/Virgen_de_Areños_solar_farm	L824953	G828219	ES0144580Y14	1	50	50	-99	40	80	120	0	0	0	0	0	0	0	50	50	50	50	50
wind	Cyprus	Asia	Western Asia	Agia Anna wind farm				20	operating	2011		onshore						Iberdrola SA		34.9724	33.4997	exact					https://gem.wiki/Agia_Anna_wind_farm	L911470	G914450	ES0144580Y14	1	20	20	13	2051	2091	2131	20	20	20	20	20	20	20	20	20	20	20	20
wind	Spain	Europe	Southern Europe	Alcarama wind farm	2		Valdemadera	45	operating	2003		onshore						Iberdrola Renovables Energia SA		42.0036	-2.0462	exact	Cervera del Río Alhama			Rioja	https://gem.wiki/Alcarama_wind_farm	L914508	G917970	ES0144580Y14	1	45	45	21	2043	2083	2123	45	45	45	45	45	45	45	45	45	45	45	45
wind	Spain	Europe	Southern Europe	Alcocero De Mola wind farm				104	shelved			onshore						Iberdrola Renovables Energia SA		42.4726	-3.3582	approximate	Alcocero de Mola		Burgos	Castilla y León	https://gem.wiki/Alcocero_De_Mola_wind_farm	L915727	G919437	ES0144580Y14	1	104	104	-99	40	80	120	0	0	0	0	0	0	0	0	0	0	0	0
wind	Spain	Europe	Southern Europe	Almendros wind farm	1			20	operating	2007		onshore						Iberdrola Renovables Energia SA		38.6577	-1.435	exact	Jumilla	Altiplano	Region of Murcia	Region of Murcia	https://gem.wiki/Almendros_wind_farm	L911471	G914451	ES0144580Y14	1	48		17	2047	2087	2127	20	20	20	20	20	20	20	20	20	20	20	20
wind	Spain	Europe	Southern Europe	Almendros wind farm	2			28	operating	2007		onshore						Iberdrola Renovables Energia SA		38.664	-1.4279	exact	Jumilla	Altiplano	Region of Murcia	Region of Murcia	https://gem.wiki/Almendros_wind_farm	L911471	G916193	ES0144580Y14	1	48	48	17	2047	2087	2127	28	28	28	28	28	28	28	28	28	28	28	28
wind	Spain	Europe	Southern Europe	Altamira wind farm (Spain)				49	operating	2009		onshore						Iberdrola Renovables Energia SA		37.029	-5.0101	exact		Guadalteba	Malaga	Andalusia	https://gem.wiki/Altamira_wind_farm_(Spain)	L914774	G918277	ES0144580Y14	1	49	49	15	2049	2089	2129	49	49	49	49	49	49	49	49	49	49	49	49
wind	Spain	Europe	Southern Europe	Alto De La Degollada wind farm				50	operating	2010		onshore						Iberdrola Renovables Energia SA		42.2883	-4.1388	approximate	Castrojeriz		Burgos	Castilla y León	https://gem.wiki/Alto_De_La_Degollada_wind_farm	L914837	G918369	ES0144580Y14	1	50	50	14	2050	2090	2130	50	50	50	50	50	50	50	50	50	50	50	50
wind	Portugal	Europe	Southern Europe	Alto Do Monção wind farm			Parque Eólico Alto do Monção	32	operating	2007		onshore						Iberdrola Renovables Energia SA		40.5033	-8.2657	exact		Viseu			https://gem.wiki/Alto_Do_Monção_wind_farm	L913482	G916765	ES0144580Y14	1	32	32	17	2047	2087	2127	32	32	32	32	32	32	32	32	32	32	32	32
wind	Spain	Europe	Southern Europe	Ameixeiras-Testeiros wind farm				50	operating	2002		onshore						Iberdrola Renovables Energia SA		42.5504	-8.2063	exact		O Deza		Galicia	https://gem.wiki/Ameixeiras-Testeiros_wind_farm	L914840	G918372	ES0144580Y14	1	50	50	22	2042	2082	2122	50	50	50	50	50	50	50	50	50	50	50	50
wind	Hungary	Europe	Eastern Europe	Amundsen wind farm				26	operating	2011		onshore						Iberdrola Renovables Energia SA		47.1982	16.8685	exact	Ikervár	Vas			https://gem.wiki/Amundsen_wind_farm	L912751	G915901	ES0144580Y14	1	26	26	13	2051	2091	2131	26	26	26	26	26	26	26	26	26	26	26	26
wind	Philippines	Asia	South-eastern Asia	Aparri Bay wind farm			Aparri Bay (Offshore) Wind Power Project, Windkraft Aparri Bay	700	pre-construction			offshore mount unknown						Triconti ECC Renewables CORP (TRICONTI); Iberdrola SA		18.4914	121.7	approximate				Cagayan Province	https://gem.wiki/Aparri_Bay_wind_farm	L901297	G927453	ES0144580Y14	0.5	700	700	-99	40	80	120	0	0	0	0	0	0	0	0	0	0	0	0
wind	Spain	Europe	Southern Europe	Argañoso wind farm				22	operating	2007		onshore						Iberdrola Renovables Energia SA		42.5341	-6.2886	exact			León	Castile and León	https://gem.wiki/Argañoso_wind_farm	L912018	G915070	ES0144580Y14	1	22	22	17	2047	2087	2127	22	22	22	22	22	22	22	22	22	22	22	22
wind	Brazil	Americas	Latin America and the Caribbean	Arizona 1 wind farm	1	Parque Eólico Arizona	Parque Eólico Arizona 1	28	operating	2013		onshore						Iberdrola Neoenergia		-5.3042	-35.382	exact	Rio do Fogo		Região Geográfica Intermediária de Natal	Rio Grande do Norte	https://gem.wiki/Arizona_1_wind_farm	L905333	G907063	ES0144580Y14	1	28	28	11	2053	2093	2133	28	28	28	28	28	28	28	28	28	28	28	28
wind	Spain	Europe	Southern Europe	Atalaya De La Solana wind farm				20	operating	2003		onshore						Iberdrola Renovables Energia SA		38.7598	-2.0552	exact			Albacete	Castile-La Mancha	https://gem.wiki/Atalaya_De_La_Solana_wind_farm	L911480	G914460	ES0144580Y14	1	20	20	21	2043	2083	2123	20	20	20	20	20	20	20	20	20	20	20	20
wind	Spain	Europe	Southern Europe	Ausejo-Ocón wind farm				50	pre-construction			onshore						Iberdrola Renovables La Rioja SA		42.2986	-2.2453	approximate	Ocón			La Rioja	https://gem.wiki/Ausejo-Ocón_wind_farm	L914851	G918387	ES0144580Y14	1	50	50	-99	40	80	120	0	0	0	0	0	0	0	0	0	0	0	0
wind	Spain	Europe	Southern Europe	Azáceta wind farm				40	construction	2024		onshore						Aixendar; Iberdrola SA		42.7851	-2.5438	approximate					https://gem.wiki/Azáceta_wind_farm	L920735	G925548	ES0144580Y14	0.5	40	40	0	2064	2104	2144	0	0	0	0	20	20	20	20	20	20	20	20
wind	Spain	Europe	Southern Europe	Badaia wind farm			Badaya	50	operating	2005		onshore						Iberdrola Renovables Energia SA		42.8502	-2.8551	exact		Gasteizko kuadrilla/Cuadrilla de Vitoria		Autonomous Community of the Basque Country	https://gem.wiki/Badaia_wind_farm	L914853	G918389	ES0144580Y14	1	50	50	19	2045	2085	2125	50	50	50	50	50	50	50	50	50	50	50	50
wind	Spain	Europe	Southern Europe	Ballestas wind farm			Ballestas-Casetona, Baca, Ballestas Et Casetona	42	operating	2019		onshore						Iberdrola Renovables Energia SA		42.2017	-4.1631	exact			Burgos	Castile and León	https://gem.wiki/Ballestas_wind_farm	L914329	G917760	ES0144580Y14	1	42	42	5	2059	2099	2139	42	42	42	42	42	42	42	42	42	42	42	42
wind	Germany	Europe	Western Europe	Baltic Eagle wind farm				476	pre-construction	2024		offshore hard mount						Iberdrola Renovables Energia SA		54.8506	13.8014	exact	Sagard				https://gem.wiki/Baltic_Eagle_wind_farm	L916195	G919992	ES0144580Y14	1	476	476	0	2064	2104	2144	0	0	0	0	0	0	0	0	0	0	0	0
wind	Ireland	Europe	Northern Europe	Barnesmore wind farm	1		Golagh	15	operating	1997		onshore							Iberdrola Renovables Energia SA	54.6976	-7.9378	exact		County Donegal			https://gem.wiki/Barnesmore_wind_farm	L910161	G912988	ES0144580Y14	1	15	15	27	2037	2077	2117	15	15	15	15	15	15	15	15	15	15	15	15
wind	Mexico	Americas	Latin America and the Caribbean	Bii Nee Stipa wind farm	1	Parque Eólico Bii Nee Stipa	Stipa Nayaá	26	operating	2010		onshore						Iberdrola Renovables Energia SA		16.5106	-94.9689	exact	Juchitán	Heroica Ciudad de Juchitán de Zaragoza		Oaxaca	https://gem.wiki/Bii_Nee_Stipa_wind_farm	L905220	G907109	ES0144580Y14	1	100		14	2050	2090	2130	26	26	26	26	26	26	26	26	26	26	26	26
wind	Mexico	Americas	Latin America and the Caribbean	Bii Nee Stipa wind farm	4	Parque Eólico Bii Nee Stipa	Stipa Nayaá, El Retiro	74	operating	2014		onshore						Iberdrola Renovables Energia SA		16.5106	-94.9689	exact	Juchitán	Heroica Ciudad de Juchitán de Zaragoza		Oaxaca	https://gem.wiki/Bii_Nee_Stipa_wind_farm	L905220	G907110	ES0144580Y14	1	100	100	10	2054	2094	2134	74	74	74	74	74	74	74	74	74	74	74	74
wind	Spain	Europe	Southern Europe	Boquerón (Iberdrola) wind farm			Sierra de Boqueron	22	operating			onshore						Iberdrola Renovables Energia SA		39.1711	-1.2278	exact	Villa de Ves		Albacete	Castile-La Mancha	https://gem.wiki/Boquerón_(Iberdrola)_wind_farm	L912032	G915086	ES0144580Y14	1	22	22	-99	40	80	120	22	22	22	22	22	22	22	22	22	22	22	22
wind	Spain	Europe	Southern Europe	Bordecorex Norte wind farm	1			18	operating	2006		onshore						Iberdrola Renovables Energia SA		41.3801	-2.7201	approximate	Velamazán		Soria	Castilla y León	https://gem.wiki/Bordecorex_Norte_wind_farm	L910994	G915909	ES0144580Y14	1	44		18	2046	2086	2126	18	18	18	18	18	18	18	18	18	18	18	18
wind	Spain	Europe	Southern Europe	Bordecorex Norte wind farm	2			26	operating	2006		onshore						Iberdrola Renovables Energia SA		41.3801	-2.7201	approximate	Velamazán		Soria	Castilla y León	https://gem.wiki/Bordecorex_Norte_wind_farm	L910994	G913917	ES0144580Y14	1	44	44	18	2046	2086	2126	26	26	26	26	26	26	26	26	26	26	26	26
wind	Spain	Europe	Southern Europe	Bullana wind farm				38	operating	2009		onshore						Iberdrola Renovables Energia SA		41.2596	-2.3801	exact			Soria	Castile and León	https://gem.wiki/Bullana_wind_farm	L914048	G917426	ES0144580Y14	1	38	38	15	2049	2089	2129	38	38	38	38	38	38	38	38	38	38	38	38
wind	Spain	Europe	Southern Europe	Buniel wind farm				114	construction	2023		onshore						Iberdrola Renovables Energia SA; Global Ottowa		42.2764	-3.7909	approximate	Albillos		Burgos	Castilla y León	https://gem.wiki/Buniel_wind_farm	L915766	G919489	ES0144580Y14	0.5	114	114	1	2063	2103	2143	0	0	0	57	57	57	57	57	57	57	57	57
wind	Spain	Europe	Southern Europe	Bureba wind farm				12	operating	2010		onshore						Iberdrola Renovables Energia SA		42.5408	-3.4101	exact			Burgos	Castile and León	https://gem.wiki/Bureba_wind_farm	L908797	G911519	ES0144580Y14	1	12	12	14	2050	2090	2130	12	12	12	12	12	12	12	12	12	12	12	12
wind	Spain	Europe	Southern Europe	Cabezuelo wind farm			El Cabezuelo	30	operating	2006		onshore						Iberdrola Renovables Energia SA		39.2333	-1.7501	exact			Albacete	Castile-La Mancha	https://gem.wiki/Cabezuelo_wind_farm	L913227	G916463	ES0144580Y14	1	30	30	18	2046	2086	2126	30	30	30	30	30	30	30	30	30	30	30	30
wind	Spain	Europe	Southern Europe	Cabimonteros wind farm				50	operating	2001		onshore						Iberdrola Renovables Energia SA		42.2476	-2.2543	exact				Rioja	https://gem.wiki/Cabimonteros_wind_farm	L914874	G918413	ES0144580Y14	1	50	50	23	2041	2081	2121	50	50	50	50	50	50	50	50	50	50	50	50
wind	Brazil	Americas	Latin America and the Caribbean	Caetité Neoenergia wind farm	1	Complexo Eólico Caetité (Neoenergia)		30	operating	2014		onshore						Iberdrola Neoenergia		-14.1846	-42.495	exact	Caetité		Região Geográfica Intermediária de Guanambi	Bahia	https://gem.wiki/Caetité_Neoenergia_wind_farm	L905334	G907064	ES0144580Y14	1	90		10	2054	2094	2134	30	30	30	30	30	30	30	30	30	30	30	30
wind	Brazil	Americas	Latin America and the Caribbean	Caetité Neoenergia wind farm	2	Complexo Eólico Caetité (Neoenergia)		30	operating	2014		onshore						Iberdrola Neoenergia		-14.1846	-42.495	exact	Caetité		Região Geográfica Intermediária de Guanambi	Bahia	https://gem.wiki/Caetité_Neoenergia_wind_farm	L905334	G907065	ES0144580Y14	1	90		10	2054	2094	2134	30	30	30	30	30	30	30	30	30	30	30	30
wind	Brazil	Americas	Latin America and the Caribbean	Caetité Neoenergia wind farm	3	Complexo Eólico Caetité (Neoenergia)		30	operating	2014		onshore						Iberdrola Neoenergia		-14.2194	-42.507	exact	Caetité		Região Geográfica Intermediária de Guanambi	Bahia	https://gem.wiki/Caetité_Neoenergia_wind_farm	L905334	G907066	ES0144580Y14	1	90	90	10	2054	2094	2134	30	30	30	30	30	30	30	30	30	30	30	30
wind	Brazil	Americas	Latin America and the Caribbean	Calangos wind farm	1	Complexo Eólico Calangos		30	operating	2016		onshore						Iberdrola Neoenergia		-6.0339	-36.544	exact	Bodó		Região Geográfica Intermediária de Caicó	Rio Grande do Norte	https://gem.wiki/Calangos_wind_farm	L905335	G907067	ES0144580Y14	1	234		8	2056	2096	2136	30	30	30	30	30	30	30	30	30	30	30	30
wind	Brazil	Americas	Latin America and the Caribbean	Calangos wind farm	2	Complexo Eólico Calangos		30	operating	2016		onshore						Iberdrola Neoenergia		-6.0166	-36.4835	exact	Bodó		Região Geográfica Intermediária de Caicó	Rio Grande do Norte	https://gem.wiki/Calangos_wind_farm	L905335	G907068	ES0144580Y14	1	234		8	2056	2096	2136	30	30	30	30	30	30	30	30	30	30	30	30
wind	Brazil	Americas	Latin America and the Caribbean	Calangos wind farm	3	Complexo Eólico Calangos		30	operating	2016		onshore						Iberdrola Neoenergia		-6.0489	-36.546	exact	Bodó		Região Geográfica Intermediária de Caicó	Rio Grande do Norte	https://gem.wiki/Calangos_wind_farm	L905335	G907069	ES0144580Y14	1	234		8	2056	2096	2136	30	30	30	30	30	30	30	30	30	30	30	30
wind	Brazil	Americas	Latin America and the Caribbean	Calangos wind farm	4	Complexo Eólico Calangos		30	operating	2016		onshore						Iberdrola Neoenergia		-6.0236	-36.472	exact	Bodó		Região Geográfica Intermediária de Caicó	Rio Grande do Norte	https://gem.wiki/Calangos_wind_farm	L905335	G907070	ES0144580Y14	1	234		8	2056	2096	2136	30	30	30	30	30	30	30	30	30	30	30	30
wind	Brazil	Americas	Latin America and the Caribbean	Calangos wind farm	5	Complexo Eólico Calangos		30	operating	2016		onshore						Iberdrola Neoenergia		-6.0303	-36.488	exact	Bodó		Região Geográfica Intermediária de Caicó	Rio Grande do Norte	https://gem.wiki/Calangos_wind_farm	L905335	G907071	ES0144580Y14	1	234		8	2056	2096	2136	30	30	30	30	30	30	30	30	30	30	30	30
wind	Brazil	Americas	Latin America and the Caribbean	Calangos wind farm	6	Complexo Eólico Calangos		30	operating	2016		onshore						Iberdrola Neoenergia		-6.0005	-36.4498	exact	Bodó		Região Geográfica Intermediária de Caicó	Rio Grande do Norte	https://gem.wiki/Calangos_wind_farm	L905335	G907072	ES0144580Y14	1	234		8	2056	2096	2136	30	30	30	30	30	30	30	30	30	30	30	30
wind	Brazil	Americas	Latin America and the Caribbean	Calangos wind farm	Santana 1	Complexo Eólico Calangos		30	operating	2016		onshore						Iberdrola Neoenergia		-6.0535	-36.4556	exact	Bodó		Região Geográfica Intermediária de Caicó	Rio Grande do Norte	https://gem.wiki/Calangos_wind_farm	L905335	G907073	ES0144580Y14	1	234		8	2056	2096	2136	30	30	30	30	30	30	30	30	30	30	30	30
wind	Brazil	Americas	Latin America and the Caribbean	Calangos wind farm	Santana 2	Complexo Eólico Calangos		24	operating	2016		onshore						Iberdrola Neoenergia		-6.0428	-36.464	exact	Lagoa Nova		Região Geográfica Intermediária de Caicó	Rio Grande do Norte	https://gem.wiki/Calangos_wind_farm	L905335	G907074	ES0144580Y14	1	234	234	8	2056	2096	2136	24	24	24	24	24	24	24	24	24	24	24	24
wind	Spain	Europe	Southern Europe	Callejas wind farm				50	operating	2004		onshore						Iberdrola Renovables Energia SA		39.633	-1.8131	exact			Cuenca	Castile-La Mancha	https://gem.wiki/Callejas_wind_farm	L914876	G918416	ES0144580Y14	1	50	50	20	2044	2084	2124	50	50	50	50	50	50	50	50	50	50	50	50
wind	Spain	Europe	Southern Europe	Campalbo wind farm				49	operating	2002		onshore						Iberdrola Renovables Energia SA		39.8878	-1.2496	exact	Graja de Campalbo		Cuenca	Castile-La Mancha	https://gem.wiki/Campalbo_wind_farm	L914777	G918282	ES0144580Y14	1	49	49	22	2042	2082	2122	49	49	49	49	49	49	49	49	49	49	49	49
wind	Spain	Europe	Southern Europe	Campisábalos wind farm				24	operating	2002		onshore						Iberdrola Renovables Energia SA		41.2965	-3.1729	exact	Campisábalos		Guadalajara	Castile-La Mancha	https://gem.wiki/Campisábalos_wind_farm	L912352	G915452	ES0144580Y14	1	24	24	22	2042	2082	2122	24	24	24	24	24	24	24	24	24	24	24	24
wind	Spain	Europe	Southern Europe	Canalejas wind farm				19	operating	2005		onshore						Iberdrola Renovables Energia SA		39.8501	-0.7501	exact		Castelló / Castellón		Valencian Community	https://gem.wiki/Canalejas_wind_farm	L911360	G914329	ES0144580Y14	1	19	19	19	2045	2085	2125	19	19	19	19	19	19	19	19	19	19	19	19
wind	Spain	Europe	Southern Europe	Cañoneras wind farm	1			18	operating	2008		onshore						Iberdrola Renovables Energia SA; Siroco Capital SCR SA		43.1448	-3.4958	exact	Soba	Asón-Agüera		Cantabria	https://gem.wiki/Cañoneras_wind_farm	L909831	G913931	ES0144580Y14	0.5	32		16	2048	2088	2128	9	9	9	9	9	9	9	9	9	9	9	9
wind	Spain	Europe	Southern Europe	Cañoneras wind farm	2			14	operating	2010		onshore						Iberdrola Renovables Energia SA; Siroco Capital SCR SA		43.1448	-3.4958	exact	Soba	Asón-Agüera		Cantabria	https://gem.wiki/Cañoneras_wind_farm	L909831	G912618	ES0144580Y14	0.5	32	32	14	2050	2090	2130	7	7	7	7	7	7	7	7	7	7	7	7
wind	Spain	Europe	Southern Europe	Cantalojas wind farm				18	operating	2004		onshore						Iberdrola Renovables Energia SA		41.2301	-3.2401	approximate	Cantalojas		Guadalajara	Castilla La Mancha	https://gem.wiki/Cantalojas_wind_farm	L911008	G913932	ES0144580Y14	1	18	18	20	2044	2084	2124	18	18	18	18	18	18	18	18	18	18	18	18
wind	Spain	Europe	Southern Europe	Capiechamartín wind farm				34	operating	2021		onshore						Iberdrola Renovables Energia SA		43.4357	-6.6075	exact	Tineo		Asturias	Asturias	https://gem.wiki/Capiechamartín_wind_farm	L913685	G917013	ES0144580Y14	1	34	34	3	2061	2101	2141	0	34	34	34	34	34	34	34	34	34	34	34
wind	Spain	Europe	Southern Europe	Capiruza wind farm	1		Capiruza IA	26	operating	2003		onshore						Iberdrola Renovables Energia SA		38.7854	-1.9917	exact			Albacete	Castile-La Mancha	https://gem.wiki/Capiruza_wind_farm	L912355	G917768	ES0144580Y14	1	92		21	2043	2083	2123	26	26	26	26	26	26	26	26	26	26	26	26
wind	Spain	Europe	Southern Europe	Capiruza wind farm	2			42	operating	2003		onshore						Iberdrola Renovables Energia SA		38.7854	-1.9917	exact			Albacete	Castile-La Mancha	https://gem.wiki/Capiruza_wind_farm	L912355	G915455	ES0144580Y14	1	92		21	2043	2083	2123	42	42	42	42	42	42	42	42	42	42	42	42
wind	Spain	Europe	Southern Europe	Capiruza wind farm	1 Ampliacíon		Capiruza IB	24	operating	2014		onshore						Iberdrola Renovables Energia SA		38.7854	-1.9917	exact			Albacete	Castile-La Mancha	https://gem.wiki/Capiruza_wind_farm	L912355	G915914	ES0144580Y14	1	92	92	10	2054	2094	2134	24	24	24	24	24	24	24	24	24	24	24	24
wind	Spain	Europe	Southern Europe	Carrascosa wind farm				38	operating	2006		onshore						Iberdrola Renovables Energia SA		40.0093	-2.761	exact	Campos del Paraíso		Cuenca	Castile-La Mancha	https://gem.wiki/Carrascosa_wind_farm	L914054	G917432	ES0144580Y14	1	38	38	18	2046	2086	2126	38	38	38	38	38	38	38	38	38	38	38	38
wind	Spain	Europe	Southern Europe	Carrasquillo wind farm				49	operating	2003		onshore						Iberdrola Renovables Energia SA		42.2295	-4.1778	exact			Burgos	Castile and León	https://gem.wiki/Carrasquillo_wind_farm	L914778	G918283	ES0144580Y14	1	49	49	21	2043	2083	2123	49	49	49	49	49	49	49	49	49	49	49	49
wind	Spain	Europe	Southern Europe	Castrobarto wind farm				44	announced			onshore						Iberdrola Renovables Energia SA		42.3448	-3.6812	approximate	Valle de Mena		Burgos	Castilla y León	https://gem.wiki/Castrobarto_wind_farm	L914455	G917911	ES0144580Y14	1	44	44	-99	40	80	120	0	0	0	0	0	0	0	0	0	0	0	0
wind	Portugal	Europe	Southern Europe	Catefica wind farm			Parque Eólico Catefica	18	operating	2005		onshore						Iberdrola Renovables Energia SA		39.0501	-9.2301	exact	Dois Portos e Runa	Lisbon			https://gem.wiki/Catefica_wind_farm	L911010	G913934	ES0144580Y14	1	18	18	19	2045	2085	2125	18	18	18	18	18	18	18	18	18	18	18	18
wind	Spain	Europe	Southern Europe	Cavar wind farm	1		Cavar onshore wind farm complex	28	operating	2020		onshore						Iberdrola Renovables Energia SA		42.2182	-1.693	approximate	Cadreita			Navarra	https://gem.wiki/Cavar_wind_farm	L913009	G916213	ES0144580Y14	1	112		4	2060	2100	2140	28	28	28	28	28	28	28	28	28	28	28	28
wind	Spain	Europe	Southern Europe	Cavar wind farm	2		Cavar onshore wind farm complex	28	operating	2020		onshore						Iberdrola Renovables Energia SA		42.2182	-1.693	approximate	Cadreita			Navarra	https://gem.wiki/Cavar_wind_farm	L913009	G916214	ES0144580Y14	1	112		4	2060	2100	2140	28	28	28	28	28	28	28	28	28	28	28	28
wind	Spain	Europe	Southern Europe	Cavar wind farm	3		Cavar onshore wind farm complex	56	operating	2020		onshore						Iberdrola Renovables Energia SA		42.2182	-1.693	approximate	Cadreita			Navarra	https://gem.wiki/Cavar_wind_farm	L913009	G918815	ES0144580Y14	1	112	112	4	2060	2100	2140	56	56	56	56	56	56	56	56	56	56	56	56
wind	Spain	Europe	Southern Europe	Cerro Blanco (Acciona Energía/Iberdrola) wind farm			Cerroblanco	48	operating	2007		onshore						Acciona Energía; Iberdrola SA		38.7315	-2.4171	exact			Albacete	Castile-La Mancha	https://gem.wiki/Cerro_Blanco_(Acciona_Energía/Iberdrola)_wind_farm	L914671	G918157	ES0144580Y14	0.5	48	48	17	2047	2087	2127	24	24	24	24	24	24	24	24	24	24	24	24
wind	Spain	Europe	Southern Europe	Cerro Blanco (Iberdrola) wind farm				42	operating	2008		onshore						Iberdrola Renovables Energia SA		42.5375	-3.4066	exact			Burgos	Castile and León	https://gem.wiki/Cerro_Blanco_(Iberdrola)_wind_farm	L914337	G917770	ES0144580Y14	1	42	42	16	2048	2088	2128	42	42	42	42	42	42	42	42	42	42	42	42
wind	Spain	Europe	Southern Europe	Cerro Calderón wind farm	1			50	operating	2004		onshore						Iberdrola Renovables Energia SA		39.4544	-2.2418	exact			Cuenca	Castile-La Mancha	https://gem.wiki/Cerro_Calderón_wind_farm	L914885	G918429	ES0144580Y14	1	50	50	20	2044	2084	2124	50	50	50	50	50	50	50	50	50	50	50	50
wind	Honduras	Americas	Latin America and the Caribbean	Cerro De Hula wind farm	1	Proyecto Eólico Cerro de Hula	Parque Eólico Santa Ana	102	operating	2011		onshore						Iberdrola SA		13.9354	-87.2374	exact		Santa Ana		Francisco Morazán	https://gem.wiki/Cerro_De_Hula_wind_farm	L905586	G907674	ES0144580Y14	1	102	102	13	2051	2091	2131	102	102	102	102	102	102	102	102	102	102	102	102
wind	Spain	Europe	Southern Europe	Cerro De La Higuera wind farm				44	operating	2009		onshore						Iberdrola Renovables Energia SA		36.9258	-4.8848	exact		Guadalteba	Malaga	Andalusia	https://gem.wiki/Cerro_De_La_Higuera_wind_farm	L914456	G917912	ES0144580Y14	1	44	44	15	2049	2089	2129	44	44	44	44	44	44	44	44	44	44	44	44
wind	Spain	Europe	Southern Europe	Cerro De La Punta wind farm				24	operating	1999		onshore							Iberdrola Renovables Energia SA	38.9864	-1.3847	exact			Albacete	Castile-La Mancha	https://gem.wiki/Cerro_De_La_Punta_wind_farm	L912361	G915461	ES0144580Y14	1	24	24	25	2039	2079	2119	24	24	24	24	24	24	24	24	24	24	24	24
wind	Spain	Europe	Southern Europe	Cerro De La Silla wind farm				15	operating	2005		onshore						Iberdrola Renovables Energia SA		38.806	-0.9529	exact	Almansa		Albacete	Castile-La Mancha	https://gem.wiki/Cerro_De_La_Silla_wind_farm	L910187	G913016	ES0144580Y14	1	15	15	19	2045	2085	2125	15	15	15	15	15	15	15	15	15	15	15	15
wind	Spain	Europe	Southern Europe	Cerro Del Palo wind farm				50	operating	2004		onshore						Iberdrola Renovables Energia SA		39.4511	-2.227	exact			Cuenca	Castile-La Mancha	https://gem.wiki/Cerro_Del_Palo_wind_farm	L914887	G918431	ES0144580Y14	1	50	50	20	2044	2084	2124	50	50	50	50	50	50	50	50	50	50	50	50
wind	Spain	Europe	Southern Europe	Cerro Revolcado wind farm				26	operating	2004		onshore						Iberdrola Renovables Energia SA		38.7292	-1.0762	exact			Albacete	Castile-La Mancha	https://gem.wiki/Cerro_Revolcado_wind_farm	L912764	G915917	ES0144580Y14	1	26	26	20	2044	2084	2124	26	26	26	26	26	26	26	26	26	26	26	26
wind	Spain	Europe	Southern Europe	Cerro Vicente wind farm	1			39	operating	2003		onshore						Iberdrola Renovables Energia SA		38.8299	-1.6816	exact	Chinchilla de Monte-Aragón		Albacete	Castile-La Mancha	https://gem.wiki/Cerro_Vicente_wind_farm	L913233	G917513	ES0144580Y14	1	69		21	2043	2083	2123	39	39	39	39	39	39	39	39	39	39	39	39
wind	Spain	Europe	Southern Europe	Cerro Vicente wind farm	2			30	operating	2003		onshore						Iberdrola Renovables Energia SA		38.8299	-1.6816	exact	Chinchilla de Monte-Aragón		Albacete	Castile-La Mancha	https://gem.wiki/Cerro_Vicente_wind_farm	L913233	G916469	ES0144580Y14	1	69	69	21	2043	2083	2123	30	30	30	30	30	30	30	30	30	30	30	30
wind	Brazil	Americas	Latin America and the Caribbean	Chafariz wind farm	1	Complexo Eólico Chafariz		35	operating	2021		onshore						Iberdrola Neoenergia		-6.9729	-36.8793	exact	Santa Luzia	Região Metropolitana de Patos	Região Geográfica Intermediária de Patos	Paraíba	https://gem.wiki/Chafariz_wind_farm	L905336	G907075	ES0144580Y14	1	475		3	2061	2101	2141	0	35	35	35	35	35	35	35	35	35	35	35
wind	Brazil	Americas	Latin America and the Caribbean	Chafariz wind farm	2	Complexo Eólico Chafariz		35	operating	2021		onshore						Iberdrola Neoenergia		-6.9968	-36.894	exact	Santa Luzia	Região Metropolitana de Patos	Região Geográfica Intermediária de Patos	Paraíba	https://gem.wiki/Chafariz_wind_farm	L905336	G907076	ES0144580Y14	1	475		3	2061	2101	2141	0	35	35	35	35	35	35	35	35	35	35	35
wind	Brazil	Americas	Latin America and the Caribbean	Chafariz wind farm	3	Complexo Eólico Chafariz		35	operating	2021		onshore						Iberdrola Neoenergia		-7.0016	-36.8983	exact	Santa Luzia	Região Metropolitana de Patos	Região Geográfica Intermediária de Patos	Paraíba	https://gem.wiki/Chafariz_wind_farm	L905336	G907077	ES0144580Y14	1	475		3	2061	2101	2141	0	35	35	35	35	35	35	35	35	35	35	35
wind	Brazil	Americas	Latin America and the Caribbean	Chafariz wind farm	4	Complexo Eólico Chafariz		35	operating	2021		onshore						Iberdrola Neoenergia		-7.0337	-36.9355	exact		Região Metropolitana de Patos	Região Geográfica Intermediária de Patos	Paraíba	https://gem.wiki/Chafariz_wind_farm	L905336	G907078	ES0144580Y14	1	475		3	2061	2101	2141	0	35	35	35	35	35	35	35	35	35	35	35
wind	Brazil	Americas	Latin America and the Caribbean	Chafariz wind farm	5	Complexo Eólico Chafariz		35	operating	2021		onshore						Iberdrola Neoenergia		-7.0039	-36.9131	exact	Santa Luzia	Região Metropolitana de Patos	Região Geográfica Intermediária de Patos	Paraíba	https://gem.wiki/Chafariz_wind_farm	L905336	G907079	ES0144580Y14	1	475		3	2061	2101	2141	0	35	35	35	35	35	35	35	35	35	35	35
wind	Brazil	Americas	Latin America and the Caribbean	Chafariz wind farm	6	Complexo Eólico Chafariz		31	operating	2021		onshore						Iberdrola Neoenergia		-6.9786	-36.8539	exact	Santa Luzia	Região Metropolitana de Patos	Região Geográfica Intermediária de Patos	Paraíba	https://gem.wiki/Chafariz_wind_farm	L905336	G907080	ES0144580Y14	1	475		3	2061	2101	2141	0	31	31	31	31	31	31	31	31	31	31	31
wind	Brazil	Americas	Latin America and the Caribbean	Chafariz wind farm	7	Complexo Eólico Chafariz		35	operating	2021		onshore						Iberdrola Neoenergia		-6.924	-36.8607	exact	Santa Luzia	Região Metropolitana de Patos	Região Geográfica Intermediária de Patos	Paraíba	https://gem.wiki/Chafariz_wind_farm	L905336	G907081	ES0144580Y14	1	475		3	2061	2101	2141	0	35	35	35	35	35	35	35	35	35	35	35
wind	Brazil	Americas	Latin America and the Caribbean	Chafariz wind farm	Canoas 2	Complexo Eólico Chafariz		35	operating	2021		onshore						Iberdrola Neoenergia		-6.8825	-36.7914	exact	Santa Luzia	Região Metropolitana de Patos	Região Geográfica Intermediária de Patos	Paraíba	https://gem.wiki/Chafariz_wind_farm	L905336	G907082	ES0144580Y14	1	475		3	2061	2101	2141	0	35	35	35	35	35	35	35	35	35	35	35
wind	Brazil	Americas	Latin America and the Caribbean	Chafariz wind farm	Canoas 3	Complexo Eólico Chafariz		35	operating	2021		onshore						Iberdrola Neoenergia		-6.8722	-36.7594	exact		Região Metropolitana de Patos	Região Geográfica Intermediária de Patos	Paraíba	https://gem.wiki/Chafariz_wind_farm	L905336	G907083	ES0144580Y14	1	475		3	2061	2101	2141	0	35	35	35	35	35	35	35	35	35	35	35
wind	Brazil	Americas	Latin America and the Caribbean	Chafariz wind farm	Canoas 4	Complexo Eólico Chafariz		35	operating	2021		onshore						Iberdrola Neoenergia		-6.8436	-36.7355	exact	São José do Sabugi	Região Metropolitana de Patos	Região Geográfica Intermediária de Patos	Paraíba	https://gem.wiki/Chafariz_wind_farm	L905336	G907084	ES0144580Y14	1	475		3	2061	2101	2141	0	35	35	35	35	35	35	35	35	35	35	35
wind	Brazil	Americas	Latin America and the Caribbean	Chafariz wind farm	Lagoa 3	Complexo Eólico Chafariz		35	operating	2021		onshore						Iberdrola Neoenergia		-6.8712	-36.8262	exact	São José do Sabugi	Região Metropolitana de Patos	Região Geográfica Intermediária de Patos	Paraíba	https://gem.wiki/Chafariz_wind_farm	L905336	G907085	ES0144580Y14	1	475		3	2061	2101	2141	0	35	35	35	35	35	35	35	35	35	35	35
wind	Brazil	Americas	Latin America and the Caribbean	Chafariz wind farm	Lagoa 4	Complexo Eólico Chafariz		21	operating	2021		onshore						Iberdrola Neoenergia		-6.8824	-36.8415	exact	Santa Luzia	Região Metropolitana de Patos	Região Geográfica Intermediária de Patos	Paraíba	https://gem.wiki/Chafariz_wind_farm	L905336	G907086	ES0144580Y14	1	475		3	2061	2101	2141	0	21	21	21	21	21	21	21	21	21	21	21
wind	Brazil	Americas	Latin America and the Caribbean	Chafariz wind farm	Ventos de Arapuá 1	Complexo Eólico Chafariz		24	operating	2021		onshore						Iberdrola Neoenergia		-7.0482	-36.9524	exact		Região Metropolitana de Patos	Região Geográfica Intermediária de Patos	Paraíba	https://gem.wiki/Chafariz_wind_farm	L905336	G907087	ES0144580Y14	1	475		3	2061	2101	2141	0	24	24	24	24	24	24	24	24	24	24	24
wind	Brazil	Americas	Latin America and the Caribbean	Chafariz wind farm	Ventos de Arapuá 2	Complexo Eólico Chafariz		35	operating	2021		onshore						Iberdrola Neoenergia		-7.0292	-36.9624	exact		Região Metropolitana de Patos	Região Geográfica Intermediária de Patos	Paraíba	https://gem.wiki/Chafariz_wind_farm	L905336	G907088	ES0144580Y14	1	475		3	2061	2101	2141	0	35	35	35	35	35	35	35	35	35	35	35
wind	Brazil	Americas	Latin America and the Caribbean	Chafariz wind farm	Ventos de Arapuá 3	Complexo Eólico Chafariz		14	operating	2021		onshore						Iberdrola Neoenergia		-7.0508	-36.9679	exact		Região Metropolitana de Patos	Região Geográfica Intermediária de Patos	Paraíba	https://gem.wiki/Chafariz_wind_farm	L905336	G907089	ES0144580Y14	1	475	475	3	2061	2101	2141	0	14	14	14	14	14	14	14	14	14	14	14
wind	Spain	Europe	Southern Europe	Chimiche wind farm	2			18	operating	2018		onshore						Iberdrola Renovables Energia SA [50%]; Inversiones Financieras Isla de Tenerife SL [50%]		28.1121	-16.5057	exact			Santa Cruz de Tenerife		https://gem.wiki/Chimiche_wind_farm	L911017	G913942	ES0144580Y14	0.5	18	18	6	2058	2098	2138	9	9	9	9	9	9	9	9	9	9	9	9
wind	Spain	Europe	Southern Europe	Chorreaderos wind farm	Altos			21	operating			onshore						Iberdrola Renovables Energia SA		36.6901	-6.1301	approximate	Jerez de la Frontera		Cádiz	Andalucía	https://gem.wiki/Chorreaderos_wind_farm	L911836	G914861	ES0144580Y14	1	51		-99	40	80	120	21	21	21	21	21	21	21	21	21	21	21	21
wind	Spain	Europe	Southern Europe	Chorreaderos wind farm	Bajos			30	operating			onshore						Iberdrola Renovables Energia SA		36.6801	-6.1301	approximate	Jerez de la Frontera		Cádiz	Andalucía	https://gem.wiki/Chorreaderos_wind_farm	L911836	G916471	ES0144580Y14	1	51	51	-99	40	80	120	30	30	30	30	30	30	30	30	30	30	30	30
wind	Spain	Europe	Southern Europe	Clares wind farm				32	operating	2006		onshore						Iberdrola Renovables Energia SA		41.0337	-2.1434	exact	Maranchón		Guadalajara	Castile-La Mancha	https://gem.wiki/Clares_wind_farm	L913497	G916782	ES0144580Y14	1	32	32	18	2046	2086	2126	32	32	32	32	32	32	32	32	32	32	32	32
wind	Ireland	Europe	Northern Europe	Clarus wind farm				1000	announced			offshore floating						DP Energy; Iberdrola SA		52.7101	-10.2701	approximate					https://gem.wiki/Clarus_wind_farm	L916291	G920103	ES0144580Y14	0.5	1000	1000	-99	40	80	120	0	0	0	0	0	0	0	0	0	0	0	0
wind	Spain	Europe	Southern Europe	Conesa wind farm	2			32	operating			onshore						Iberdrola Renovables Energia SA		41.5062	1.2624	exact	Conesa	Conca de Barberà	Tarragona	Catalonia	https://gem.wiki/Conesa_wind_farm	L913012	G916783	ES0144580Y14	1	32	32	-99	40	80	120	32	32	32	32	32	32	32	32	32	32	32	32
wind	Spain	Europe	Southern Europe	Conquista De La Sierra wind farm				50	pre-construction			onshore						Iberdrola Renovables Energia SA		39.3301	-5.7306	approximate	Conquista de la Sierra		Trujillo	Extremadura	https://gem.wiki/Conquista_De_La_Sierra_wind_farm	L914899	G918447	ES0144580Y14	1	50	50	-99	40	80	120	0	0	0	0	0	0	0	0	0	0	0	0
wind	Spain	Europe	Southern Europe	Cordel-Vidural wind farm				37	operating	2021		onshore						Iberdrola Renovables Energia SA		43.5391	-6.7234	approximate	Navia			Asturias	https://gem.wiki/Cordel-Vidural_wind_farm	L913989	G917361	ES0144580Y14	1	37	37	3	2061	2101	2141	0	37	37	37	37	37	37	37	37	37	37	37
wind	Spain	Europe	Southern Europe	Cortijo La Linera wind farm				28	operating	2008		onshore						Iberdrola Renovables Energia SA		38.1144	-2.5711	exact	Santiago-Pontones		Jaén	Andalusia	https://gem.wiki/Cortijo_La_Linera_wind_farm	L913013	G916218	ES0144580Y14	1	28	28	16	2048	2088	2128	28	28	28	28	28	28	28	28	28	28	28	28
wind	Spain	Europe	Southern Europe	Cruz De Carrutero wind farm				40	operating	2011		onshore						Iberdrola Renovables Energia SA		42.2505	-4.7189	exact			Palencia	Castile and León	https://gem.wiki/Cruz_De_Carrutero_wind_farm	L914201	G917605	ES0144580Y14	1	40	40	13	2051	2091	2131	40	40	40	40	40	40	40	40	40	40	40	40
wind	Spain	Europe	Southern Europe	Cruz wind farm	1		Cruz San Martin	40	operating	2003		onshore						Iberdrola Renovables Energia SA		39.858	-1.5798	exact			Cuenca	Castile-La Mancha	https://gem.wiki/Cruz_wind_farm	L912769	G917606	ES0144580Y14	1	66		21	2043	2083	2123	40	40	40	40	40	40	40	40	40	40	40	40
wind	Spain	Europe	Southern Europe	Cruz wind farm	2		Cruz San Martin	26	operating	2003		onshore						Iberdrola Renovables Energia SA		39.858	-1.5798	exact			Cuenca	Castile-La Mancha	https://gem.wiki/Cruz_wind_farm	L912769	G915922	ES0144580Y14	1	66	66	21	2043	2083	2123	26	26	26	26	26	26	26	26	26	26	26	26
wind	Hungary	Europe	Eastern Europe	Csoma wind farm	1			38	operating	2010		onshore						Iberdrola Renovables Energia SA		47.2033	16.859	approximate	Komárom	Komárom-Esztergom			https://gem.wiki/Csoma_wind_farm	L914058	G917436	ES0144580Y14	1	38	38	14	2050	2090	2130	38	38	38	38	38	38	38	38	38	38	38	38
wind	Spain	Europe	Southern Europe	Cuesta Colorada wind farm				50	operating	2003		onshore						Iberdrola Renovables Energia SA		39.4663	-2.2057	exact			Cuenca	Castile-La Mancha	https://gem.wiki/Cuesta_Colorada_wind_farm	L914903	G918451	ES0144580Y14	1	50	50	21	2043	2083	2123	50	50	50	50	50	50	50	50	50	50	50	50
wind	Taiwan	Asia	Eastern Asia	Da Chungbu floating wind farm		大中部, 大中部離岸風力發電計畫, 大中部離岸風電	Da Zhongbu, Great Central Offshore wind farm, Da Chung Bu	1800	shelved			offshore floating						Iberdrola Renewables INC		24.4284	120.249	approximate				Taichung County	https://gem.wiki/Da_Chungbu_floating_wind_farm	L916904	G920978	ES0144580Y14	1	1800	1800	-99	40	80	120	0	0	0	0	0	0	0	0	0	0	0	0
wind	Spain	Europe	Southern Europe	Dólar wind farm	1			50	operating	2006		onshore						Iberdrola Renovables Energia SA		37.1766	-2.9502	exact		Comarca de Guadix	Granada	Andalusia	https://gem.wiki/Dólar_wind_farm	L914907	G918455	ES0144580Y14	1	100		18	2046	2086	2126	50	50	50	50	50	50	50	50	50	50	50	50
wind	Spain	Europe	Southern Europe	Dólar wind farm	3			50	operating	2006		onshore						Iberdrola Renovables Energia SA		37.1766	-2.9502	exact		Comarca de Guadix	Granada	Andalusia	https://gem.wiki/Dólar_wind_farm	L914907	G918456	ES0144580Y14	1	100	100	18	2046	2086	2126	50	50	50	50	50	50	50	50	50	50	50	50
wind	Spain	Europe	Southern Europe	Doña Benita Cuéllar wind farm				32	operating	2008		onshore						Iberdrola Renovables Energia SA		36.5892	-5.9911	exact	Jerez	Campiña de Jerez	Cádiz	Andalusia	https://gem.wiki/Doña_Benita_Cuéllar_wind_farm	L913500	G916786	ES0144580Y14	1	32	32	16	2048	2088	2128	32	32	32	32	32	32	32	32	32	32	32	32
wind	Mexico	Americas	Latin America and the Caribbean	Dos Arbolitos wind farm		Parque Eólico Dos Arbolitos	Bii Nee Stipa II Fase IV	70	operating	2014		onshore						Iberdrola Renovables Energia SA		16.5119	-94.9462	exact		Heroica Ciudad de Juchitán de Zaragoza		Oaxaca	https://gem.wiki/Dos_Arbolitos_wind_farm	L905343	G907111	ES0144580Y14	1	70	70	10	2054	2094	2134	70	70	70	70	70	70	70	70	70	70	70	70
wind	Spain	Europe	Southern Europe	Dos Pueblos wind farm				20	operating	2008		onshore						Iberdrola Renovables Energia SA		41.2801	-2.9401	approximate	Miedes de Atienza		Guadalajara	Castilla La Mancha	https://gem.wiki/Dos_Pueblos_wind_farm	L911533	G914521	ES0144580Y14	1	20	20	16	2048	2088	2128	20	20	20	20	20	20	20	20	20	20	20	20
wind	Spain	Europe	Southern Europe	El Candal wind farm				38	operating	2012		onshore						Iberdrola Renovables Energia SA		43.3983	-6.9301	exact			Asturias	Asturias	https://gem.wiki/El_Candal_wind_farm	L914059	G917437	ES0144580Y14	1	38	38	12	2052	2092	2132	38	38	38	38	38	38	38	38	38	38	38	38
wind	Spain	Europe	Southern Europe	El Carril wind farm				28	operating	2008		onshore						Iberdrola Renovables Energia SA		42.2884	-4.1406	approximate	Castrojeriz		Burgos	Castilla y León	https://gem.wiki/El_Carril_wind_farm	L913021	G916226	ES0144580Y14	1	28	28	16	2048	2088	2128	28	28	28	28	28	28	28	28	28	28	28	28
wind	Spain	Europe	Southern Europe	El Centenar wind farm				40	operating	2009		onshore						Iberdrola Renovables Energia SA		36.539	-5.3868	exact		Serranía de Ronda	Malaga	Andalusia	https://gem.wiki/El_Centenar_wind_farm	L914205	G917610	ES0144580Y14	1	40	40	15	2049	2089	2129	40	40	40	40	40	40	40	40	40	40	40	40
wind	Spain	Europe	Southern Europe	El Navazo wind farm	1			30	operating	2003		onshore						Iberdrola Renovables Energia SA		42.2501	-4.2001	approximate	Pedrosa del Príncipe (BU)		Burgos	Castilla y León	https://gem.wiki/El_Navazo_wind_farm	L913246	G916485	ES0144580Y14	1	30	30	21	2043	2083	2123	30	30	30	30	30	30	30	30	30	30	30	30
wind	Spain	Europe	Southern Europe	El Pradillo wind farm				23	operating	2020		onshore						Iberdrola Renovables Energia SA		41.877	-1.497	exact	Borja	Campo de Borja		Aragon	https://gem.wiki/El_Pradillo_wind_farm	L912210	G915293	ES0144580Y14	1	23	23	4	2060	2100	2140	23	23	23	23	23	23	23	23	23	23	23	23
wind	Spain	Europe	Southern Europe	El Puntal wind farm	2			15	operating	2022		onshore						Iberdrola Renovables Energia SA		37.1244	-4.8686	approximate	Sierra de Yeguas		Málaga	Andalucía	https://gem.wiki/El_Puntal_wind_farm	L910219	G913051	ES0144580Y14	1	15	15	2	2062	2102	2142	0	0	15	15	15	15	15	15	15	15	15	15
wind	Spain	Europe	Southern Europe	El Romeral wind farm				14	operating			onshore						Iberdrola Renovables Energia SA		38.9186	-1.7228	exact	Chinchilla de Monte-Aragón		Albacete	Castile-La Mancha	https://gem.wiki/El_Romeral_wind_farm	L909850	G912639	ES0144580Y14	1	14	14	-99	40	80	120	14	14	14	14	14	14	14	14	14	14	14	14
wind	Spain	Europe	Southern Europe	El Saucito wind farm			Saucito Fase B	30	operating	2009		onshore						Iberdrola Renovables Energia SA		37.5802	-7.1459	exact		El Andévalo	Huelva	Andalusia	https://gem.wiki/El_Saucito_wind_farm	L913248	G916487	ES0144580Y14	1	30	30	15	2049	2089	2129	30	30	30	30	30	30	30	30	30	30	30	30
wind	Spain	Europe	Southern Europe	El Segredal wind farm				36	operating	2012		onshore						Iberdrola Renovables Energia SA		43.4213	-6.6653	exact			Asturias	Asturias	https://gem.wiki/El_Segredal_wind_farm	L913874	G917227	ES0144580Y14	1	36	36	12	2052	2092	2132	36	36	36	36	36	36	36	36	36	36	36	36
wind	Spain	Europe	Southern Europe	El Sombrío wind farm				28	operating	2008		onshore						Iberdrola Renovables Energia SA		42.4301	-3.7301	approximate	Merindad del Río Ubierna		Burgos	Castilla y León	https://gem.wiki/El_Sombrío_wind_farm	L913023	G916228	ES0144580Y14	1	28	28	16	2048	2088	2128	28	28	28	28	28	28	28	28	28	28	28	28
wind	Spain	Europe	Southern Europe	El Tablado wind farm				20	operating	2003		onshore						Iberdrola Renovables Energia SA		41.693	-1.8344	exact			Soria	Castile and León	https://gem.wiki/El_Tablado_wind_farm	L911542	G914533	ES0144580Y14	1	20	20	21	2043	2083	2123	20	20	20	20	20	20	20	20	20	20	20	20
wind	Spain	Europe	Southern Europe	El Teruelo wind farm				43	operating	2003		onshore						Iberdrola Renovables Energia SA		42.2201	-4.2701	exact			Palencia	Castile and León	https://gem.wiki/El_Teruelo_wind_farm	L914424	G917875	ES0144580Y14	1	43	43	21	2043	2083	2123	43	43	43	43	43	43	43	43	43	43	43	43
wind	Spain	Europe	Southern Europe	El Vallito wind farm				13	pre-construction			onshore						Iberdrola Renovables Energia SA		37.1392	-3.6705	approximate	Chimiche		Santa Cruz de Tenerife	Las Islas Canarias	https://gem.wiki/El_Vallito_wind_farm	L909527	G912285	ES0144580Y14	1	13	13	-99	40	80	120	0	0	0	0	0	0	0	0	0	0	0	0
wind	Spain	Europe	Southern Europe	Elgea wind farm			Sierra de Elgea, Sierra Elgea	24	operating	2000		onshore						Iberdrola Renovables Energia SA		42.9625	-2.4892	exact		Arabako lautada/Llanada Alavesa		Autonomous Community of the Basque Country	https://gem.wiki/Elgea_wind_farm	L912382	G915484	ES0144580Y14	1	24	24	24	2040	2080	2120	24	24	24	24	24	24	24	24	24	24	24	24
wind	Spain	Europe	Southern Europe	Elgea-Urkilla wind farm			Urkilla	32	operating	2003		onshore						Iberdrola Renovables Energia SA		42.9575	-2.4458	exact		Debagoiena		Autonomous Community of the Basque Country	https://gem.wiki/Elgea-Urkilla_wind_farm	L913502	G916790	ES0144580Y14	1	32	32	21	2043	2083	2123	32	32	32	32	32	32	32	32	32	32	32	32
wind	Spain	Europe	Southern Europe	Encinillas wind farm				23	operating	2020		onshore						Iberdrola Renovables Energia SA		42.1529	-4.6922	approximate	Paredes de Nava		Palencia	Castilla y León	https://gem.wiki/Encinillas_wind_farm	L912211	G915294	ES0144580Y14	1	23	23	4	2060	2100	2140	23	23	23	23	23	23	23	23	23	23	23	23
wind	Spain	Europe	Southern Europe	Entredicho wind farm				36	operating	2003		onshore						Iberdrola Renovables Energia SA		41.324	-0.934	exact		Campo de Belchite		Aragon	https://gem.wiki/Entredicho_wind_farm	L913875	G917229	ES0144580Y14	1	36	36	21	2043	2083	2123	36	36	36	36	36	36	36	36	36	36	36	36
wind	Spain	Europe	Southern Europe	Escalon wind farm				30	operating			onshore						Iberdrola Renovables Energia SA		40.1669	-4.4048	exact		Torrijos	Toledo	Castile-La Mancha	https://gem.wiki/Escalon_wind_farm	L913256	G916495	ES0144580Y14	1	30	30	-99	40	80	120	30	30	30	30	30	30	30	30	30	30	30	30
wind	Spain	Europe	Southern Europe	Escurrillo wind farm				50	operating	2003		onshore						Iberdrola Renovables Energia SA		42.2586	-2.197	exact	Herce			Rioja	https://gem.wiki/Escurrillo_wind_farm	L914925	G918475	ES0144580Y14	1	50		21	2043	2083	2123	50	50	50	50	50	50	50	50	50	50	50	50
wind	Spain	Europe	Southern Europe	Ferreira wind farm	2			50	operating	2006		onshore						Iberdrola Renovables Energia SA		37.2174	-2.9997	exact		Comarca de Guadix	Granada	Andalusia	https://gem.wiki/Ferreira_wind_farm	L914927	G918478	ES0144580Y14	1	50	50	18	2046	2086	2126	50	50	50	50	50	50	50	50	50	50	50	50
wind	Spain	Europe	Southern Europe	Flagship Demonstrator wind farm				10	pre-construction	2025		offshore floating						Iberdrola Renovables Energia SA		27.9929	-15.357	approximate				Las Islas Canarias or País Vasco	https://gem.wiki/Flagship_Demonstrator_wind_farm	L907841	G910513	ES0144580Y14	1	10	10	-1	2065	2105	2145	0	0	0	0	0	0	0	0	0	0	0	0
wind	Spain	Europe	Southern Europe	Forgoselo (Iberdrola) wind farm				24	operating	2000		onshore						Iberdrola Renovables Energia SA		43.4747	-8.039	exact		Ferrol		Galicia	https://gem.wiki/Forgoselo_(Iberdrola)_wind_farm	L912388	G915491	ES0144580Y14	1	24	24	24	2040	2080	2120	24	24	24	24	24	24	24	24	24	24	24	24
wind	Australia	Oceania	Australia and New Zealand	Forsayth wind farm			Queensland Wind	150	announced			onshore						GE Renewable Energy [50%]; Iberdrola Australia [50%]		-18.5856	143.652	approximate	Forsayth			Queensland	https://gem.wiki/Forsayth_wind_farm	L906225	G908470	ES0144580Y14	0.5	150	150	-99	40	80	120	0	0	0	0	0	0	0	0	0	0	0	0
wind	Spain	Europe	Southern Europe	Fuendetodos wind farm	1			46	operating	2003		onshore						Iberdrola Renovables Energia SA		41.345	-0.943	exact		Campo de Belchite		Aragon	https://gem.wiki/Fuendetodos_wind_farm	L914600	G918075	ES0144580Y14	1	94		21	2043	2083	2123	46	46	46	46	46	46	46	46	46	46	46	46
wind	Spain	Europe	Southern Europe	Fuendetodos wind farm	2			48	operating	2003		onshore						Iberdrola Renovables Energia SA		41.379	-0.9601	exact		Campo de Belchite		Aragon	https://gem.wiki/Fuendetodos_wind_farm	L914600	G918173	ES0144580Y14	1	94	94	21	2043	2083	2123	48	48	48	48	48	48	48	48	48	48	48	48
wind	Spain	Europe	Southern Europe	Fuente Salada wind farm			Fuentesalada	46	operating	2011		onshore						Iberdrola Renovables Energia SA		42.3319	-4.0584	exact	Sasamón		Burgos	Castile and León	https://gem.wiki/Fuente_Salada_wind_farm	L914601	G918076	ES0144580Y14	1	46	46	13	2051	2091	2131	46	46	46	46	46	46	46	46	46	46	46	46
wind	Spain	Europe	Southern Europe	Fuenteblanca wind farm				10	operating	2021		onshore						Iberdrola Renovables Energia SA		42.3448	-3.6812	approximate	Valle de Santibáñez		Burgos	Castilla y León	https://gem.wiki/Fuenteblanca_wind_farm	L907855	G910527	ES0144580Y14	1	10	10	3	2061	2101	2141	0	10	10	10	10	10	10	10	10	10	10	10
wind	Spain	Europe	Southern Europe	Garciaz wind farm				50	pre-construction			onshore						Iberdrola Renovables Energia SA		39.4131	-5.6276	approximate	Garciaz		Trujillo	Extremadura	https://gem.wiki/Garciaz_wind_farm	L914936	G918488	ES0144580Y14	1	50	50	-99	40	80	120	0	0	0	0	0	0	0	0	0	0	0	0
wind	Spain	Europe	Southern Europe	Gatún 1F wind farm	2			17	operating	2003		onshore						Iberdrola Renovables Energia SA		42.1514	-2.041	exact				Rioja	https://gem.wiki/Gatún_1F_wind_farm	L910819	G913718	ES0144580Y14	1	17	17	21	2043	2083	2123	17	17	17	17	17	17	17	17	17	17	17	17
wind	Spain	Europe	Southern Europe	Gatún wind farm	1			50	operating	2002		onshore						Iberdrola Renovables Energia SA		42.1514	-2.041	exact				Rioja	https://gem.wiki/Gatún_wind_farm	L914939	G918491	ES0144580Y14	1	50	50	22	2042	2082	2122	50	50	50	50	50	50	50	50	50	50	50	50
wind	Spain	Europe	Southern Europe	Gavilanes wind farm	1			17	operating	2003		onshore						Iberdrola Renovables Energia SA		38.6022	-1.2915	exact	Jumilla	Altiplano	Region of Murcia	Region of Murcia	https://gem.wiki/Gavilanes_wind_farm	L910235	G913720	ES0144580Y14	1	32		21	2043	2083	2123	17	17	17	17	17	17	17	17	17	17	17	17
wind	Spain	Europe	Southern Europe	Gavilanes wind farm	Ampliación			15	operating	2007		onshore						Iberdrola Renovables Energia SA		38.608	-1.2758	exact	Jumilla	Altiplano	Region of Murcia	Region of Murcia	https://gem.wiki/Gavilanes_wind_farm	L910235	G913070	ES0144580Y14	1	32	32	17	2047	2087	2127	15	15	15	15	15	15	15	15	15	15	15	15
wind	Spain	Europe	Southern Europe	Gavina Floating Offshore wind farm				500	pre-construction			offshore floating						Iberdrola		42.185	3.1412	approximate					https://gem.wiki/Gavina_Floating_Offshore_wind_farm	L920744	G925559	ES0144580Y14	1	500	500	-99	40	80	120	0	0	0	0	0	0	0	0	0	0	0	0
wind	Spain	Europe	Southern Europe	Goia Peñote wind farm			Goia-Peñote	40	operating	2005		onshore						Iberdrola Renovables Energia SA		43.4277	-7.6894	exact	Vilalba	Terra Chá		Galicia	https://gem.wiki/Goia_Peñote_wind_farm	L914214	G917621	ES0144580Y14	1	40	40	19	2045	2085	2125	40	40	40	40	40	40	40	40	40	40	40	40
wind	Spain	Europe	Southern Europe	Gomera wind farm				18	operating	2010		onshore						Iberdrola Renovables Energia SA		37.237	-5.1028	approximate	Osuna		Sevilla	Andalucía	https://gem.wiki/Gomera_wind_farm	L911061	G913996	ES0144580Y14	1	18	18	14	2050	2090	2130	18	18	18	18	18	18	18	18	18	18	18	18
wind	Spain	Europe	Southern Europe	Grado wind farm			Grayo Adalon, Grado Montejo	27	operating	2005		onshore						Iberdrola Renovables Energia SA		39.877	-0.0558	exact		Castelló / Castellón		Valencian Community	https://gem.wiki/Grado_wind_farm	L912899	G916077	ES0144580Y14	1	27	27	19	2045	2085	2125	27	27	27	27	27	27	27	27	27	27	27	27
wind	Sweden	Europe	Northern Europe	Gretas Klackar wind farm	1			1800	pre-construction	2028		offshore hard mount						Iberdrola Renovables Energia SA		61.5259	17.697	exact					https://gem.wiki/Gretas_Klackar_wind_farm	L916240	G920167	ES0144580Y14	1	1800	1800	-4	2068	2108	2148	0	0	0	0	0	0	0	0	0	0	0	0
wind	Philippines	Asia	South-eastern Asia	Guimaras Strait Wind Energy Project	1		Guimaras Strait wind farm, Guimaras Strait I Wind Power Project, Guimaras 1 Offshore wind power project	600	pre-construction			offshore hard mount						WindKraft Group; Iberdrola Renewables INC		10.7799	122.85	approximate			Negros		https://gem.wiki/Guimaras_Strait_Wind_Energy_Project	L901299	G927558	ES0144580Y14	0.5	600	600	-99	40	80	120	0	0	0	0	0	0	0	0	0	0	0	0
wind	Taiwan	Asia	Eastern Asia	Guo Feng Offshore wind farm		果豐離岸風力發電計畫, 果豐離岸風電, 果豐離岸風場	Guo Feng, Guo-Feng Offshore	375	announced			offshore hard mount						Iberdrola Renewables INC		23.9555	119.738	approximate				Penghu County	https://gem.wiki/Guo_Feng_Offshore_wind_farm	L916920	G920998	ES0144580Y14	1	375	375	-99	40	80	120	0	0	0	0	0	0	0	0	0	0	0	0
wind	Spain	Europe	Southern Europe	Herrera La Huesa wind farm			La Huesa, Herrera II	32	operating	2021		onshore						Iberdrola Renovables Energia SA		42.3616	-3.9304	approximate	Isar		Burgos	Castilla y León	https://gem.wiki/Herrera_La_Huesa_wind_farm	L913510	G916799	ES0144580Y14	1	32	32	3	2061	2101	2141	0	32	32	32	32	32	32	32	32	32	32	32
wind	Spain	Europe	Southern Europe	Higueruela wind farm				38	operating	1999		onshore						Iberdrola Renovables Energia SA		38.9772	-1.4429	exact			Albacete	Castile-La Mancha	https://gem.wiki/Higueruela_wind_farm	L914067	G917446	ES0144580Y14	1	38	38	25	2039	2079	2119	38	38	38	38	38	38	38	38	38	38	38	38
wind	Spain	Europe	Southern Europe	Hijes wind farm				13	operating	2005		onshore						Iberdrola Renovables Energia SA		41.2789	-3.0434	exact	Hijes		Guadalajara	Castile-La Mancha	https://gem.wiki/Hijes_wind_farm	L909554	G912312	ES0144580Y14	1	13	13	19	2045	2085	2125	13	13	13	13	13	13	13	13	13	13	13	13
wind	Spain	Europe	Southern Europe	Hontalbilla wind farm	1			37	operating	2004		onshore						Iberdrola Renovables Energia SA		41.3301	-2.6401	approximate	Adradas		Soria	Castilla y León	https://gem.wiki/Hontalbilla_wind_farm	L913128	G917369	ES0144580Y14	1	66		20	2044	2084	2124	37	37	37	37	37	37	37	37	37	37	37	37
wind	Spain	Europe	Southern Europe	Hontalbilla wind farm	2			29	operating	2004		onshore						Iberdrola Renovables Energia SA		41.3301	-2.5801	approximate	Adradas		Soria	Castilla y León	https://gem.wiki/Hontalbilla_wind_farm	L913128	G916349	ES0144580Y14	1	66	66	20	2044	2084	2124	29	29	29	29	29	29	29	29	29	29	29	29
wind	Spain	Europe	Southern Europe	Hozalia wind farm				31	pre-construction			onshore						Iberdrola Renovables Energia SA		42.5892	-5.5633	approximate	Valle de Losa			Castilla y León	https://gem.wiki/Hozalia_wind_farm	L913433	G916702	ES0144580Y14	1	31	31	-99	40	80	120	0	0	0	0	0	0	0	0	0	0	0	0
wind	Spain	Europe	Southern Europe	Huéneja wind farm	3			50	operating	2006		onshore						Iberdrola Renovables Energia SA		37.1766	-2.9502	exact		Comarca de Guadix	Granada	Andalusia	https://gem.wiki/Huéneja_wind_farm	L914949	G918501	ES0144580Y14	1	50	50	18	2046	2086	2126	50	50	50	50	50	50	50	50	50	50	50	50
wind	Romania	Europe	Eastern Europe	Iberdrola Cogealac wind farm	2		Cogealac Ed	108	operating	2012		onshore						Iberdrola SA		45.9852	24.6859	approximate		Constanta		Dobrega	https://gem.wiki/Iberdrola_Cogealac_wind_farm	L915746	G919463	ES0144580Y14	1	322		12	2052	2092	2132	108	108	108	108	108	108	108	108	108	108	108	108
wind	Romania	Europe	Eastern Europe	Iberdrola Cogealac wind farm	1		Cogealac Ed	214	operating	2013		onshore						Iberdrola SA		45.9852	24.6859	approximate		Constanta		Dobrega	https://gem.wiki/Iberdrola_Cogealac_wind_farm	L915746	G919766	ES0144580Y14	1	322	322	11	2053	2093	2133	214	214	214	214	214	214	214	214	214	214	214	214
wind	Spain	Europe	Southern Europe	Iberdrola Floating Offshore wind farm				300	pre-construction	2026		offshore floating						Iberdrola Renovables Energia SA		27.6501	-15.5601	approximate					https://gem.wiki/Iberdrola_Floating_Offshore_wind_farm	L916092	G919869	ES0144580Y14	1	300	300	-2	2066	2106	2146	0	0	0	0	0	0	0	0	0	0	0	0
wind	Romania	Europe	Eastern Europe	Iberdrola Piatra wind farms	1		Piatra	64	operating	2013		onshore						Iberdrola SA		44.5245	28.3922	approximate		Constanta county		Dobrogea	https://gem.wiki/Iberdrola_Piatra_wind_farms	L915333	G918972	ES0144580Y14	1	64	64	11	2053	2093	2133	64	64	64	64	64	64	64	64	64	64	64	64
wind	Romania	Europe	Eastern Europe	Iberdrola Sacele wind farm	1		Sacele, Iberdrola Sacele	27	operating	2013		onshore						Iberdrola SA		44.5245	28.3922	approximate		Constanta county		Dobrogea	https://gem.wiki/Iberdrola_Sacele_wind_farm	L912957	G916147	ES0144580Y14	1	162		11	2053	2093	2133	27	27	27	27	27	27	27	27	27	27	27	27
wind	Romania	Europe	Eastern Europe	Iberdrola Sacele wind farm	2		Sacele, Iberdrola Sacele	27	operating	2013		onshore						Iberdrola SA		44.5245	28.3922	approximate		Constanta county		Dobrogea	https://gem.wiki/Iberdrola_Sacele_wind_farm	L912957	G916148	ES0144580Y14	1	162		11	2053	2093	2133	27	27	27	27	27	27	27	27	27	27	27	27
wind	Romania	Europe	Eastern Europe	Iberdrola Sacele wind farm	3		Sacele, Iberdrola Sacele	27	operating	2013		onshore						Iberdrola SA		44.5245	28.3922	approximate		Constanta county		Dobrogea	https://gem.wiki/Iberdrola_Sacele_wind_farm	L912957	G916149	ES0144580Y14	1	162		11	2053	2093	2133	27	27	27	27	27	27	27	27	27	27	27	27
wind	Romania	Europe	Eastern Europe	Iberdrola Sacele wind farm	4		Sacele, Iberdrola Sacele	27	operating	2013		onshore						Iberdrola SA		44.5245	28.3922	approximate		Constanta county		Dobrogea	https://gem.wiki/Iberdrola_Sacele_wind_farm	L912957	G916150	ES0144580Y14	1	162		11	2053	2093	2133	27	27	27	27	27	27	27	27	27	27	27	27
wind	Romania	Europe	Eastern Europe	Iberdrola Sacele wind farm	5		Sacele, Iberdrola Sacele	27	operating	2013		onshore						Iberdrola SA		44.5245	28.3922	approximate		Constanta county		Dobrogea	https://gem.wiki/Iberdrola_Sacele_wind_farm	L912957	G916151	ES0144580Y14	1	162		11	2053	2093	2133	27	27	27	27	27	27	27	27	27	27	27	27
wind	Romania	Europe	Eastern Europe	Iberdrola Sacele wind farm	6		Sacele, Iberdrola Sacele	27	operating	2013		onshore						Iberdrola SA		44.5245	28.3922	approximate		Constanta county		Dobrogea	https://gem.wiki/Iberdrola_Sacele_wind_farm	L912957	G916152	ES0144580Y14	1	162	162	11	2053	2093	2133	27	27	27	27	27	27	27	27	27	27	27	27
wind	Japan	Asia	Eastern Asia	Iberdrola/GIG Floating wind farm				700	shelved			offshore floating						Iberdrola Renewables Japan; Green Investment Group (GIG)		32.5993	129.151	approximate			Fukue Island		https://gem.wiki/Iberdrola/GIG_Floating_wind_farm	L901166	G901359	ES0144580Y14	0.5	700	700	-99	40	80	120	0	0	0	0	0	0	0	0	0	0	0	0
wind	Spain	Europe	Southern Europe	Igea wind farm	1		Igea-Cornago Sur	28	operating	2006		onshore						Iberdrola Renovables Energia SA		42.0143	-2.0678	exact				Rioja	https://gem.wiki/Igea_wind_farm	L913039	G916246	ES0144580Y14	1	28	28	18	2046	2086	2126	28	28	28	28	28	28	28	28	28	28	28	28
wind	Spain	Europe	Southern Europe	Iglesias wind farm				94	construction	2023		onshore						Iberdrola Renovables Energia SA; Global Ottowa		42.2976	-3.9892	approximate	Iglesias		Burgos	Castilla y León	https://gem.wiki/Iglesias_wind_farm	L915644	G919342	ES0144580Y14	0.5	94	94	1	2063	2103	2143	0	0	0	47	47	47	47	47	47	47	47	47
wind	Hungary	Europe	Eastern Europe	Ikervár wind farm				34	operating	2011		onshore						Iberdrola Renovables Energia SA		47.2008	16.8689	exact	Ikervár	Vas			https://gem.wiki/Ikervár_wind_farm	L913701	G917032	ES0144580Y14	1	34	34	13	2051	2091	2131	34	34	34	34	34	34	34	34	34	34	34	34
wind	Ireland	Europe	Northern Europe	Inis Ealga wind farm			Inis Ealga Marine Energy Park, Inis Ealga FOW	1000	pre-construction	2030		offshore floating						DP Energy; Iberdrola SA		51.601	-7.5801	approximate					https://gem.wiki/Inis_Ealga_wind_farm	L916298	G920111	ES0144580Y14	0.5	1000	1000	-6	2070	2110	2150	0	0	0	0	0	0	0	0	0	0	0	0
wind	Spain	Europe	Southern Europe	Isabela wind farm				48	operating	2001		onshore						Iberdrola Renovables Energia SA		38.7111	-2.1758	exact			Albacete	Castile-La Mancha	https://gem.wiki/Isabela_wind_farm	L914695	G918186	ES0144580Y14	1	48	48	23	2041	2081	2121	48	48	48	48	48	48	48	48	48	48	48	48
wind	Hungary	Europe	Eastern Europe	Kisigmand wind farm			Nagyigmand	50	operating	2010		onshore						Iberdrola Renovables Energia SA		47.6747	18.0711	exact	Kisigmánd	Komárom-Esztergom			https://gem.wiki/Kisigmand_wind_farm	L914953	G918505	ES0144580Y14	1	50		14	2050	2090	2130	50	50	50	50	50	50	50	50	50	50	50	50
wind	Poland	Europe	Eastern Europe	Korytnica wind farm	2		Korytnica North wind farm	50	operating	2022		onshore						Iberdrola SA		52.2254	21.0284	approximate				Mazowieckie voivodeship	https://gem.wiki/Korytnica_wind_farm	L914955	G918507	ES0144580Y14	1	50	50	2	2062	2102	2142	0	0	50	50	50	50	50	50	50	50	50	50
wind	Spain	Europe	Southern Europe	La Casetona wind farm				28	operating	2019		onshore						Iberdrola Renovables Energia SA		42.1824	-4.1521	approximate	Vallejera		Burgos	Castilla y León	https://gem.wiki/La_Casetona_wind_farm	L913043	G916250	ES0144580Y14	1	28	28	5	2059	2099	2139	28	28	28	28	28	28	28	28	28	28	28	28
wind	Spain	Europe	Southern Europe	La Cotera wind farm				18	operating	2008		onshore						Iberdrola Renovables Energia SA		43.3598	-4.3493	exact	Valdáliga	Costa Occidental		Cantabria	https://gem.wiki/La_Cotera_wind_farm	L911120	G914063	ES0144580Y14	1	18	18	16	2048	2088	2128	18	18	18	18	18	18	18	18	18	18	18	18
wind	Spain	Europe	Southern Europe	La Cuerda wind farm			Cuerda	31	operating	2000		onshore						Iberdrola Renovables Energia SA		38.7972	-1.4727	exact			Albacete	Castile-La Mancha	https://gem.wiki/La_Cuerda_wind_farm	L913439	G916710	ES0144580Y14	1	31	31	24	2040	2080	2120	31	31	31	31	31	31	31	31	31	31	31	31
wind	Spain	Europe	Southern Europe	La Magdalena wind farm				24	operating	2004		onshore						Iberdrola Renovables Energia SA		43.0442	-3.8341	exact			Burgos	Castile and León	https://gem.wiki/La_Magdalena_wind_farm	L912437	G915546	ES0144580Y14	1	24	24	20	2044	2084	2124	24	24	24	24	24	24	24	24	24	24	24	24
wind	Spain	Europe	Southern Europe	La Plana wind farm	3			15	operating	1996		onshore							Iberdrola Renovables Energia SA	41.536	-1.079	exact		Valdejalón		Aragon	https://gem.wiki/La_Plana_wind_farm	L910280	G913120	ES0144580Y14	1	32		28	2036	2076	2116	15	15	15	15	15	15	15	15	15	15	15	15
wind	Spain	Europe	Southern Europe	La Plana wind farm	2			17	operating	1999		onshore						Iberdrola Renovables Energia SA		41.538	-1.104	exact		Valdejalón		Aragon	https://gem.wiki/La_Plana_wind_farm	L910280	G913753	ES0144580Y14	1	32	32	25	2039	2079	2119	17	17	17	17	17	17	17	17	17	17	17	17
wind	Spain	Europe	Southern Europe	La Retuerta wind farm			Retuerta Fase B	38	operating	2009		onshore						Iberdrola Renovables Energia SA		37.5076	-7.2704	exact	El Almendro	El Andévalo	Huelva	Andalusia	https://gem.wiki/La_Retuerta_wind_farm	L914072	G917453	ES0144580Y14	1	38	38	15	2049	2089	2129	38	38	38	38	38	38	38	38	38	38	38	38
wind	Spain	Europe	Southern Europe	La Tallisca wind farm				40	operating	2009		onshore						Iberdrola Renovables Energia SA		37.5069	-7.2701	approximate	El Almendro		Huelva	Andalucía	https://gem.wiki/La_Tallisca_wind_farm	L914226	G917636	ES0144580Y14	1	40	40	15	2049	2089	2129	40	40	40	40	40	40	40	40	40	40	40	40
wind	Spain	Europe	Southern Europe	La Torrecilla wind farm	1			16	operating	2008		onshore						Iberdrola Renovables Energia SA		40.793	-0.987	exact	Pancrudo	Comunidad de Teruel		Aragon	https://gem.wiki/La_Torrecilla_wind_farm	L910570	G913445	ES0144580Y14	1	38		16	2048	2088	2128	16	16	16	16	16	16	16	16	16	16	16	16
wind	Spain	Europe	Southern Europe	La Torrecilla wind farm	2			22	operating	2012		onshore						Iberdrola Renovables Energia SA		40.7938	-0.9796	exact	Pancrudo	Comunidad de Teruel		Aragon	https://gem.wiki/La_Torrecilla_wind_farm	L910570	G915142	ES0144580Y14	1	38	38	12	2052	2092	2132	22	22	22	22	22	22	22	22	22	22	22	22
wind	Mexico	Americas	Latin America and the Caribbean	La Ventosa wind farm	1	Parque Eólico La Ventosa		49	operating	2009		onshore						Iberdrola Renovables Energia SA		16.4355	-95.0174	approximate	Juchitan de Zaragoza			Oaxaca	https://gem.wiki/La_Ventosa_wind_farm	L905344	G907114	ES0144580Y14	1	102		15	2049	2089	2129	49	49	49	49	49	49	49	49	49	49	49	49
wind	Mexico	Americas	Latin America and the Caribbean	La Ventosa wind farm	2	Parque Eólico La Ventosa		31	operating	2009		onshore						Iberdrola Renovables Energia SA		16.4355	-95.0174	approximate	Juchitan de Zaragoza			Oaxaca	https://gem.wiki/La_Ventosa_wind_farm	L905344	G907115	ES0144580Y14	1	102		15	2049	2089	2129	31	31	31	31	31	31	31	31	31	31	31	31
wind	Mexico	Americas	Latin America and the Caribbean	La Ventosa wind farm	3	Parque Eólico La Ventosa		22	operating	2014		onshore						Iberdrola Renovables Energia SA		16.4355	-95.0174	approximate	Juchitan de Zaragoza			Oaxaca	https://gem.wiki/La_Ventosa_wind_farm	L905344	G907113	ES0144580Y14	1	102	102	10	2054	2094	2134	22	22	22	22	22	22	22	22	22	22	22	22
wind	Spain	Europe	Southern Europe	Labradas Fusionado wind farm				37	operating	2002		onshore						Iberdrola Renovables Energia SA		42.1109	-5.8778	exact			Zamora	Castile and León	https://gem.wiki/Labradas_Fusionado_wind_farm	L913999	G917373	ES0144580Y14	1	37	37	22	2042	2082	2122	37	37	37	37	37	37	37	37	37	37	37	37
wind	Spain	Europe	Southern Europe	Larriba wind farm	2a		Larriba-Hornillos	32	operating	2005		onshore						Iberdrola Renovables Energia SA		42.1935	-2.3878	exact	Ajamil			Rioja	https://gem.wiki/Larriba_wind_farm	L913524	G916814	ES0144580Y14	1	32	32	19	2045	2085	2125	32	32	32	32	32	32	32	32	32	32	32	32
wind	Spain	Europe	Southern Europe	Las Aulagas wind farm				13	pre-construction			onshore						Iberdrola Renovables Energia SA		37.1392	-3.6705	approximate	Granadilla de Abona	Tenerife	Santa Cruz de las Palmas	Las Islas Canarias	https://gem.wiki/Las_Aulagas_wind_farm	L909575	G912336	ES0144580Y14	1	13	13	-99	40	80	120	0	0	0	0	0	0	0	0	0	0	0	0
wind	Spain	Europe	Southern Europe	Las Cabezas wind farm				17	operating	2009		onshore						Iberdrola Renovables Energia SA		37.6143	-7.2488	exact		El Andévalo	Huelva	Andalusia	https://gem.wiki/Las_Cabezas_wind_farm	L910846	G913754	ES0144580Y14	1	17	17	15	2049	2089	2129	17	17	17	17	17	17	17	17	17	17	17	17
wind	Spain	Europe	Southern Europe	Las Viñas wind farm				38	operating	2010		onshore						Iberdrola Renovables Energia SA		42.4735	-3.7437	exact	Valle de Santibáñez		Burgos	Castile and León	https://gem.wiki/Las_Viñas_wind_farm	L914074	G917456	ES0144580Y14	1	38	38	14	2050	2090	2130	38	38	38	38	38	38	38	38	38	38	38	38
wind	Spain	Europe	Southern Europe	Layna wind farm				50	operating	2012		onshore						Iberdrola Renovables Energia SA		41.1014	-2.2685	exact			Soria	Castile and León	https://gem.wiki/Layna_wind_farm	L914969	G918525	ES0144580Y14	1	50	50	12	2052	2092	2132	50	50	50	50	50	50	50	50	50	50	50	50
wind	Spain	Europe	Southern Europe	Llorengoz wind farm				44	announced			onshore						Iberdrola Renovables Energia SA		42.3448	-3.6812	approximate	Valle de Losa		Burgos	Castilla y León	https://gem.wiki/Llorengoz_wind_farm	L914477	G917934	ES0144580Y14	1	44	44	-99	40	80	120	0	0	0	0	0	0	0	0	0	0	0	0
wind	Spain	Europe	Southern Europe	Los Alburejos wind farm				10	operating	2008		onshore						Iberdrola Renovables Energia SA		36.4594	-5.8716	exact		La Janda	Cádiz	Andalusia	https://gem.wiki/Los_Alburejos_wind_farm	L908006	G910691	ES0144580Y14	1	10	10	16	2048	2088	2128	10	10	10	10	10	10	10	10	10	10	10	10
wind	Spain	Europe	Southern Europe	Los Bolaños wind farm				24	operating	2008		onshore						Iberdrola Renovables Energia SA		36.6801	-6.1301	approximate	Jerez de la Frontera		Cádiz	Andalucía	https://gem.wiki/Los_Bolaños_wind_farm	L912454	G915564	ES0144580Y14	1	24	24	16	2048	2088	2128	24	24	24	24	24	24	24	24	24	24	24	24
wind	Spain	Europe	Southern Europe	Los Campillos wind farm				34	operating	2006		onshore						Iberdrola Renovables Energia SA		41.3865	-2.5706	approximate	Almazán		Soria	Castilla y León	https://gem.wiki/Los_Campillos_wind_farm	L913709	G917040	ES0144580Y14	1	34	34	18	2046	2086	2126	34	34	34	34	34	34	34	34	34	34	34	34
wind	Spain	Europe	Southern Europe	Los Collados wind farm				11	operating	2011		onshore						Iberdrola Renovables Energia SA		42.3364	-4.1084	exact			Burgos	Castile and León	https://gem.wiki/Los_Collados_wind_farm	L908472	G911173	ES0144580Y14	1	11	11	13	2051	2091	2131	11	11	11	11	11	11	11	11	11	11	11	11
wind	Spain	Europe	Southern Europe	Los Liríos wind farm				48	operating	2010		onshore						Iberdrola Renovables Energia SA		37.3736	-7.3771	exact		Costa Occidental	Huelva	Andalusia	https://gem.wiki/Los_Liríos_wind_farm	L914713	G918204	ES0144580Y14	1	48	48	14	2050	2090	2130	48	48	48	48	48	48	48	48	48	48	48	48
wind	Spain	Europe	Southern Europe	Luzón Norte wind farm				38	operating	2006		onshore						Iberdrola Renovables Energia SA		41.0513	-2.2704	exact	Luzón		Guadalajara	Castile-La Mancha	https://gem.wiki/Luzón_Norte_wind_farm	L914078	G917462	ES0144580Y14	1	38	38	18	2046	2086	2126	38	38	38	38	38	38	38	38	38	38	38	38
wind	United Kingdom	Europe	Northern Europe	MachairWind offshore wind farm			Plan Option Area W1, Machair Wind (W1)	2000	announced			offshore hard mount						Iberdrola; ScottishPower Renewables (SPR)		56.0141	-6.9699	approximate					https://gem.wiki/MachairWind_offshore_wind_farm	L921169	G926086	ES0144580Y14	0.5	2000	2000	-99	40	80	120	0	0	0	0	0	0	0	0	0	0	0	0
wind	Spain	Europe	Southern Europe	Majal Alto wind farm				50	operating	2009		onshore						Iberdrola Renovables Energia SA		37.6114	-7.2458	approximate	Puebla de Guzmán		Huelva	Andalucía	https://gem.wiki/Majal_Alto_wind_farm	L914986	G918544	ES0144580Y14	1	50		15	2049	2089	2129	50	50	50	50	50	50	50	50	50	50	50	50
wind	Spain	Europe	Southern Europe	Malefatón wind farm				50	operating	2000		onshore						Iberdrola Renovables Energia SA		38.9601	-1.4401	approximate	Higueruela		Albacete	Castilla La Mancha	https://gem.wiki/Malefatón_wind_farm	L914988	G918547	ES0144580Y14	1	50	50	24	2040	2080	2120	50	50	50	50	50	50	50	50	50	50	50	50
wind	Spain	Europe	Southern Europe	Maranchón Sur wind farm				12	operating	2006		onshore						Iberdrola Renovables Energia SA		41.0299	-2.1964	exact	Maranchón		Guadalajara	Castile-La Mancha	https://gem.wiki/Maranchón_Sur_wind_farm	L909078	G911812	ES0144580Y14	1	12	12	18	2046	2086	2126	12	12	12	12	12	12	12	12	12	12	12	12
wind	Spain	Europe	Southern Europe	Maranchón wind farm	1			18	operating	2005		onshore						Iberdrola Renovables Energia SA		41.0475	-2.2048	exact	Maranchón		Guadalajara	Castile-La Mancha	https://gem.wiki/Maranchón_wind_farm	L911155	G914100	ES0144580Y14	1	66		19	2045	2085	2125	18	18	18	18	18	18	18	18	18	18	18	18
wind	Spain	Europe	Southern Europe	Maranchón wind farm	4			48	operating	2005		onshore						Iberdrola Renovables Energia SA		41.0501	-2.2001	approximate	Maranchón		Guadalajara	Castilla La Mancha	https://gem.wiki/Maranchón_wind_farm	L911155	G918206	ES0144580Y14	1	66	66	19	2045	2085	2125	48	48	48	48	48	48	48	48	48	48	48	48
wind	Spain	Europe	Southern Europe	Martín De La Jara wind farm				36	operating	2022		onshore						Iberdrola Renovables Energia SA		37.1078	-4.9636	approximate	Martín de la Jara		Sevilla	Andalucía	https://gem.wiki/Martín_De_La_Jara_wind_farm	L913912	G917270	ES0144580Y14	1	36	36	2	2062	2102	2142	0	0	36	36	36	36	36	36	36	36	36	36
wind	Spain	Europe	Southern Europe	Masgalán-Campo De Coco wind farm				50	operating	2001		onshore						Iberdrola Renovables Energia SA		42.601	-8.267	approximate	Forcarei		Pontevedra	Galicia	https://gem.wiki/Masgalán-Campo_De_Coco_wind_farm	L914992	G918551	ES0144580Y14	1	50		23	2041	2081	2121	50	50	50	50	50	50	50	50	50	50	50	50
wind	Spain	Europe	Southern Europe	Maza wind farm				50	operating	2005		onshore						Iberdrola Renovables Energia SA		39.6358	-1.7449	exact			Cuenca	Castile-La Mancha	https://gem.wiki/Maza_wind_farm	L914993	G918552	ES0144580Y14	1	50	50	19	2045	2085	2125	50	50	50	50	50	50	50	50	50	50	50	50
wind	Brazil	Americas	Latin America and the Caribbean	Mel 2 wind farm	1	Parque Eólico Mel 2		20	operating	2013		onshore						Iberdrola Neoenergia		-4.9467	-36.9642	exact	Areia Branca		Região Geográfica Intermediária de Mossoró	Rio Grande do Norte	https://gem.wiki/Mel_2_wind_farm	L905337	G907090	ES0144580Y14	1	20	20	11	2053	2093	2133	20	20	20	20	20	20	20	20	20	20	20	20
wind	Greece	Europe	Southern Europe	Mikronoros wind farm		Μικρονορος	Makrynoros	33.6	operating	2022		onshore						Iberdrola		41.3312	25.8456	exact		Rodopi Regional Unit	Eastern Macedonia and Thrace	Macedonia and Thrace	https://gem.wiki/Mikronoros_wind_farm	L913667	G916992	ES0144580Y14	1	33.6	33.6	2	2062	2102	2142	0	0	33.6	33.6	33.6	33.6	33.6	33.6	33.6	33.6	33.6	33.6
wind	Spain	Europe	Southern Europe	Moixacre wind farm				50	pre-construction			onshore						Iberdrola Renovables Energia SA		40.6188	-0.0998	approximate	Morella		Castellón	Valencia	https://gem.wiki/Moixacre_wind_farm	L914999	G918561	ES0144580Y14	1	50		-99	40	80	120	0	0	0	0	0	0	0	0	0	0	0	0
wind	Spain	Europe	Southern Europe	Molar De Molinar wind farm				50	operating	2000		onshore						Iberdrola Renovables Energia SA		38.6938	-2.0506	exact			Albacete	Castile-La Mancha	https://gem.wiki/Molar_De_Molinar_wind_farm	L915001	G918563	ES0144580Y14	1	50	50	24	2040	2080	2120	50	50	50	50	50	50	50	50	50	50	50	50
wind	Spain	Europe	Southern Europe	Monte Carrio wind farm				31	operating	2002		onshore						Iberdrola Renovables Energia SA		42.6609	-8.1129	exact		O Deza		Galicia	https://gem.wiki/Monte_Carrio_wind_farm	L913443	G916715	ES0144580Y14	1	31	31	22	2042	2082	2122	31	31	31	31	31	31	31	31	31	31	31	31
wind	Spain	Europe	Southern Europe	Monte Molón wind farm				30	operating	2002		onshore						Iberdrola Renovables Energia SA		39.7046	-1.3809	exact			Cuenca	Castile-La Mancha	https://gem.wiki/Monte_Molón_wind_farm	L913331	G916586	ES0144580Y14	1	30	30	22	2042	2082	2122	30	30	30	30	30	30	30	30	30	30	30	30
wind	Spain	Europe	Southern Europe	Monte Treito wind farm				39	operating	2001		onshore						Iberdrola Renovables Energia SA		42.7501	-8.7801	exact		Noia		Galicia	https://gem.wiki/Monte_Treito_wind_farm	L914141	G917535	ES0144580Y14	1	39	39	23	2041	2081	2121	39	39	39	39	39	39	39	39	39	39	39	39
wind	Spain	Europe	Southern Europe	Morón De Almazán wind farm				50	operating	2006		onshore						Iberdrola Renovables Energia SA		41.3892	-2.4272	exact			Soria	Castile and León	https://gem.wiki/Morón_De_Almazán_wind_farm	L915005	G918570	ES0144580Y14	1	50	50	18	2046	2086	2126	50	50	50	50	50	50	50	50	50	50	50	50
wind	Spain	Europe	Southern Europe	Morrablancar wind farm				13	operating	2003		onshore						Iberdrola Renovables Energia SA		38.9746	-1.5841	exact			Albacete	Castile-La Mancha	https://gem.wiki/Morrablancar_wind_farm	L909587	G912353	ES0144580Y14	1	13	13	21	2043	2083	2123	13	13	13	13	13	13	13	13	13	13	13	13
wind	Australia	Oceania	Australia and New Zealand	Mount James wind farm			Mt James	1000	pre-construction	2038		onshore						Iberdrola		-19.964	144.203	approximate	Hughenden			Queensland	https://gem.wiki/Mount_James_wind_farm	L906119	G908332	ES0144580Y14	1	1000	1000	-14	2078	2118	2158	0	0	0	0	0	0	0	0	0	0	0	0
wind	Spain	Europe	Southern Europe	Muela (Iberdrola) wind farm	1		La Muela	50	operating	2004		onshore						Iberdrola Renovables Energia SA		39.458	-2.2525	exact			Cuenca	Castile-La Mancha	https://gem.wiki/Muela_(Iberdrola)_wind_farm	L915006	G918571	ES0144580Y14	1	50		20	2044	2084	2124	50	50	50	50	50	50	50	50	50	50	50	50
wind	Spain	Europe	Southern Europe	Muela Cubillo wind farm				50	operating	2008		onshore						Iberdrola Renovables Energia SA		40.0247	-1.471	exact			Cuenca	Castile-La Mancha	https://gem.wiki/Muela_Cubillo_wind_farm	L915007	G918572	ES0144580Y14	1	50	50	16	2048	2088	2128	50	50	50	50	50	50	50	50	50	50	50	50
wind	Spain	Europe	Southern Europe	Muela De Tortosilla wind farm			Muela Torto	37	operating	2000		onshore						Iberdrola Renovables Energia SA		38.9667	-1.2167	exact	Alpera		Albacete	Castile-La Mancha	https://gem.wiki/Muela_De_Tortosilla_wind_farm	L914002	G917376	ES0144580Y14	1	37	37	24	2040	2080	2120	37	37	37	37	37	37	37	37	37	37	37	37
wind	Spain	Europe	Southern Europe	Munilla wind farm	Ampliación			10	operating			onshore						Iberdrola Renovables Energia SA		42.2064	-2.3397	exact	Munilla			Rioja	https://gem.wiki/Munilla_wind_farm	L908046	G910733	ES0144580Y14	1	10	10	-99	40	80	120	10	10	10	10	10	10	10	10	10	10	10	10
wind	Spain	Europe	Southern Europe	Munilla-La Santa wind farm			Munilla-Lasanta	36	operating	2004		onshore						Iberdrola Renovables Energia SA		42.2064	-2.3397	exact	Munilla			Rioja	https://gem.wiki/Munilla-La_Santa_wind_farm	L913917	G917275	ES0144580Y14	1	36	36	20	2044	2084	2124	36	36	36	36	36	36	36	36	36	36	36	36
wind	Spain	Europe	Southern Europe	Muras wind farm	1			24	operating	2000		onshore						Iberdrola Renovables Energia SA		43.5378	-7.7299	exact		Terra Chá		Galicia	https://gem.wiki/Muras_wind_farm	L912479	G915592	ES0144580Y14	1	48		24	2040	2080	2120	24	24	24	24	24	24	24	24	24	24	24	24
wind	Spain	Europe	Southern Europe	Muras wind farm	2			24	operating	2000		onshore						Iberdrola Renovables Energia SA		43.4668	-7.7238	exact		Terra Chá		Galicia	https://gem.wiki/Muras_wind_farm	L912479	G915593	ES0144580Y14	1	48	48	24	2040	2080	2120	24	24	24	24	24	24	24	24	24	24	24	24
wind	Spain	Europe	Southern Europe	Nacimiento wind farm				24	operating	2008		onshore						Iberdrola Renovables Energia SA		37.1253	-2.6648	exact			Almeria	Andalusia	https://gem.wiki/Nacimiento_wind_farm	L912481	G915595	ES0144580Y14	1	24	24	16	2048	2088	2128	24	24	24	24	24	24	24	24	24	24	24	24
wind	Brazil	Americas	Latin America and the Caribbean	Oitis wind farm	1	Complexo Eólico Oitis		50	operating	2023		onshore						Iberdrola Neoenergia		-9.0044	-41.7177	exact	Dom Inocêncio		Região Geográfica Intermediária de São Raimundo Nonato	Piauí	https://gem.wiki/Oitis_wind_farm	L905338	G907091	ES0144580Y14	1	572		1	2063	2103	2143	0	0	0	50	50	50	50	50	50	50	50	50
wind	Brazil	Americas	Latin America and the Caribbean	Oitis wind farm	2	Complexo Eólico Oitis		28	operating	2023		onshore						Iberdrola Neoenergia		-9.0051	-41.7274	exact	Dom Inocêncio		Região Geográfica Intermediária de São Raimundo Nonato	Piauí	https://gem.wiki/Oitis_wind_farm	L905338	G907092	ES0144580Y14	1	572		1	2063	2103	2143	0	0	0	28	28	28	28	28	28	28	28	28
wind	Brazil	Americas	Latin America and the Caribbean	Oitis wind farm	3	Complexo Eólico Oitis		50	operating	2023		onshore						Iberdrola Neoenergia		-9.0062	-41.7485	exact	Dom Inocêncio		Região Geográfica Intermediária de São Raimundo Nonato	Piauí	https://gem.wiki/Oitis_wind_farm	L905338	G907093	ES0144580Y14	1	572		1	2063	2103	2143	0	0	0	50	50	50	50	50	50	50	50	50
wind	Brazil	Americas	Latin America and the Caribbean	Oitis wind farm	4	Complexo Eólico Oitis		50	operating	2023		onshore						Iberdrola Neoenergia		-9.0224	-41.7501	exact	Dom Inocêncio		Região Geográfica Intermediária de São Raimundo Nonato	Piauí	https://gem.wiki/Oitis_wind_farm	L905338	G907094	ES0144580Y14	1	572		1	2063	2103	2143	0	0	0	50	50	50	50	50	50	50	50	50
wind	Brazil	Americas	Latin America and the Caribbean	Oitis wind farm	5	Complexo Eólico Oitis		50	operating	2023		onshore						Iberdrola Neoenergia		-9.0397	-41.7527	exact	Dom Inocêncio	Região Administrativa Integrada de Desenvolvimento do Polo Petrolina e Juazeiro	Região Geográfica Intermediária de São Raimundo Nonato	Piauí	https://gem.wiki/Oitis_wind_farm	L905338	G907095	ES0144580Y14	1	572		1	2063	2103	2143	0	0	0	50	50	50	50	50	50	50	50	50
wind	Brazil	Americas	Latin America and the Caribbean	Oitis wind farm	6	Complexo Eólico Oitis		50	operating	2023		onshore						Iberdrola Neoenergia		-9.0526	-41.7364	exact	Dom Inocêncio		Região Geográfica Intermediária de São Raimundo Nonato	Piauí	https://gem.wiki/Oitis_wind_farm	L905338	G907096	ES0144580Y14	1	572		1	2063	2103	2143	0	0	0	50	50	50	50	50	50	50	50	50
wind	Brazil	Americas	Latin America and the Caribbean	Oitis wind farm	7	Complexo Eólico Oitis		50	operating	2023		onshore						Iberdrola Neoenergia		-9.0712	-41.735	exact	Dom Inocêncio	Região Administrativa Integrada de Desenvolvimento do Polo Petrolina e Juazeiro	Região Geográfica Intermediária de São Raimundo Nonato	Piauí	https://gem.wiki/Oitis_wind_farm	L905338	G907097	ES0144580Y14	1	572		1	2063	2103	2143	0	0	0	50	50	50	50	50	50	50	50	50
wind	Brazil	Americas	Latin America and the Caribbean	Oitis wind farm	8	Complexo Eólico Oitis		50	operating	2023		onshore						Iberdrola Neoenergia		-9.0982	-41.7609	exact	Dom Inocêncio		Região Geográfica Intermediária de São Raimundo Nonato	Piauí	https://gem.wiki/Oitis_wind_farm	L905338	G907098	ES0144580Y14	1	572		1	2063	2103	2143	0	0	0	50	50	50	50	50	50	50	50	50
wind	Brazil	Americas	Latin America and the Caribbean	Oitis wind farm	9	Complexo Eólico Oitis		50	operating	2023		onshore						Iberdrola Neoenergia		-9.0536	-41.7733	exact	Dom Inocêncio		Região Geográfica Intermediária de São Raimundo Nonato	Piauí	https://gem.wiki/Oitis_wind_farm	L905338	G907099	ES0144580Y14	1	572		1	2063	2103	2143	0	0	0	50	50	50	50	50	50	50	50	50
wind	Brazil	Americas	Latin America and the Caribbean	Oitis wind farm	10	Complexo Eólico Oitis		50	operating	2023		onshore						Iberdrola Neoenergia		-9.0506	-41.7728	exact	Dom Inocêncio		Região Geográfica Intermediária de São Raimundo Nonato	Piauí	https://gem.wiki/Oitis_wind_farm	L905338	G907100	ES0144580Y14	1	572		1	2063	2103	2143	0	0	0	50	50	50	50	50	50	50	50	50
wind	Brazil	Americas	Latin America and the Caribbean	Oitis wind farm	21	Complexo Eólico Oitis		44	operating	2023		onshore						Iberdrola Neoenergia		-9.0537	-41.7071	exact	Casa Nova	Região Administrativa Integrada de Desenvolvimento do Polo Petrolina e Juazeiro	Região Geográfica Intermediária de Juazeiro	Bahia	https://gem.wiki/Oitis_wind_farm	L905338	G907101	ES0144580Y14	1	572		1	2063	2103	2143	0	0	0	44	44	44	44	44	44	44	44	44
wind	Brazil	Americas	Latin America and the Caribbean	Oitis wind farm	22	Complexo Eólico Oitis		50	operating	2023		onshore						Iberdrola Neoenergia		-9.0738	-41.7148	exact	Casa Nova	Região Administrativa Integrada de Desenvolvimento do Polo Petrolina e Juazeiro	Região Geográfica Intermediária de São Raimundo Nonato	Piauí	https://gem.wiki/Oitis_wind_farm	L905338	G907102	ES0144580Y14	1	572	572	1	2063	2103	2143	0	0	0	50	50	50	50	50	50	50	50	50
wind	Spain	Europe	Southern Europe	Oiz wind farm			Oiz Bizkaia	26	operating	2004		onshore						Iberdrola Renovables Energia SA		43.2156	-2.5778	exact				Autonomous Community of the Basque Country	https://gem.wiki/Oiz_wind_farm	L912813	G915977	ES0144580Y14	1	26	26	20	2044	2084	2124	26	26	26	26	26	26	26	26	26	26	26	26
wind	Spain	Europe	Southern Europe	Orbaneja wind farm			Herrera II (Orbaneja)	18	operating	2021		onshore						Iberdrola Renovables Energia SA		42.3616	-3.9304	approximate	Isar		Burgos	Castilla y León	https://gem.wiki/Orbaneja_wind_farm	L911180	G914129	ES0144580Y14	1	18	18	3	2061	2101	2141	0	18	18	18	18	18	18	18	18	18	18	18
wind	Spain	Europe	Southern Europe	Panondres wind farm				21	operating	2021		onshore						Iberdrola Renovables Energia SA		43.4485	-6.7051	approximate	Villayón			Asturias	https://gem.wiki/Panondres_wind_farm	L911917	G914955	ES0144580Y14	1	21	21	3	2061	2101	2141	0	21	21	21	21	21	21	21	21	21	21	21
wind	Spain	Europe	Southern Europe	Páramo Vega wind farm			Paramo de Vega	18	operating	2009		onshore						Iberdrola Renovables Energia SA		42.5166	-3.7873	exact			Burgos	Castile and León	https://gem.wiki/Páramo_Vega_wind_farm	L911188	G914137	ES0144580Y14	1	18	18	15	2049	2089	2129	18	18	18	18	18	18	18	18	18	18	18	18
wind	Mexico	Americas	Latin America and the Caribbean	Parques Ecologicos De Mexico wind farm		Parques Ecológicos de México Parque Eólico	PEM	80	operating	2008		onshore						Iberdrola Renovables Energia SA		16.4329	-95.0181	approximate	Juchitan de Zaragoza			Oaxaca	https://gem.wiki/Parques_Ecologicos_De_Mexico_wind_farm	L905345	G907116	ES0144580Y14	1	80	80	16	2048	2088	2128	80	80	80	80	80	80	80	80	80	80	80	80
wind	France	Europe	Western Europe	Pays De Boussac wind farm			Bussière-Saint-Georges	17	operating	2012		onshore						Iberdrola SA		46.4183	2.1723	exact		Creuse		New Aquitaine	https://gem.wiki/Pays_De_Boussac_wind_farm	L910873	G913784	ES0144580Y14	1	17	17	12	2052	2092	2132	17	17	17	17	17	17	17	17	17	17	17	17
wind	Spain	Europe	Southern Europe	Pedregal wind farm	1		Pedregal Tremuzo	31	operating	2003		onshore						Iberdrola Renovables Energia SA		42.7762	-9.0603	exact		Muros		Galicia	https://gem.wiki/Pedregal_wind_farm	L909970	G912775	ES0144580Y14	1	45		21	2043	2083	2123	31	31	31	31	31	31	31	31	31	31	31	31
wind	Spain	Europe	Southern Europe	Pedregal wind farm	2		Pedregal Tremuzo	14	operating	2003		onshore						Iberdrola Renovables Energia SA		42.7762	-9.0603	exact		Muros		Galicia	https://gem.wiki/Pedregal_wind_farm	L909970	G916721	ES0144580Y14	1	45	45	21	2043	2083	2123	14	14	14	14	14	14	14	14	14	14	14	14
wind	Spain	Europe	Southern Europe	Pena Da Cruz wind farm	1			13	operating	2002		onshore						Iberdrola Renovables Energia SA		42.2501	-7.3833	exact	Montederramo		Ourense	Galicia	https://gem.wiki/Pena_Da_Cruz_wind_farm	L908093	G910781	ES0144580Y14	1	23		22	2042	2082	2122	13	13	13	13	13	13	13	13	13	13	13	13
wind	Spain	Europe	Southern Europe	Pena Da Cruz wind farm	Amplicación			10	operating	2004		onshore						Iberdrola Renovables Energia SA		42.2601	-7.3801	approximate	Chandrexa de Queixa	Terra de Trives		Galicia	https://gem.wiki/Pena_Da_Cruz_wind_farm	L908093	G912368	ES0144580Y14	1	23	23	20	2044	2084	2124	10	10	10	10	10	10	10	10	10	10	10	10
wind	Spain	Europe	Southern Europe	Peñaflor wind farm	3			45	operating	2012		onshore						Iberdrola Renovables Energia SA		41.7814	-4.9428	approximate	Peñaflor de Hornija		Valladolid	Castilla y León	https://gem.wiki/Peñaflor_wind_farm	L914559	G918026	ES0144580Y14	1	90		12	2052	2092	2132	45	45	45	45	45	45	45	45	45	45	45	45
wind	Spain	Europe	Southern Europe	Peñaflor wind farm	4			45	operating	2012		onshore						Iberdrola Renovables Energia SA		41.7113	-4.9832	approximate	Peñaflor de Hornija		Valladolid	Castilla y León	https://gem.wiki/Peñaflor_wind_farm	L914559	G918027	ES0144580Y14	1	90	90	12	2052	2092	2132	45	45	45	45	45	45	45	45	45	45	45	45
wind	Spain	Europe	Southern Europe	Pico Collalbas wind farm				30	operating			onshore						Iberdrola Renovables Energia SA		39.8481	-1.4965	exact	Henarejos		Cuenca	Castile-La Mancha	https://gem.wiki/Pico_Collalbas_wind_farm	L913345	G916604	ES0144580Y14	1	30	30	-99	40	80	120	30	30	30	30	30	30	30	30	30	30	30	30
wind	Spain	Europe	Southern Europe	Pico Del Fraile wind farm				44	announced			onshore						Iberdrola Renovables Energia SA		42.3448	-3.6812	approximate	Valle de Losa		Burgos	Castilla y León	https://gem.wiki/Pico_Del_Fraile_wind_farm	L914479	G917937	ES0144580Y14	1	44	44	-99	40	80	120	0	0	0	0	0	0	0	0	0	0	0	0
wind	Mexico	Americas	Latin America and the Caribbean	Pier wind farm	2	Parque Eólico Pier		66	operating	2015		onshore						Iberdrola Renovables Energia SA		18.8721	-97.3957	exact	Esperanza			Puebla	https://gem.wiki/Pier_wind_farm	L905346	G907649	ES0144580Y14	1	286		9	2055	2095	2135	66	66	66	66	66	66	66	66	66	66	66	66
wind	Mexico	Americas	Latin America and the Caribbean	Pier wind farm	4	Parque Eólico Pier		220	operating	2020		onshore						Iberdrola Renovables Energia SA		18.8606	-97.376	approximate	Esperanza			Puebla	https://gem.wiki/Pier_wind_farm	L905346	G907117	ES0144580Y14	1	286	286	4	2060	2100	2140	220	220	220	220	220	220	220	220	220	220	220	220
wind	Australia	Oceania	Australia and New Zealand	Port Augusta Renewable Energy Park wind farm				210	operating	2022		onshore						Iberdrola		-32.5954	137.885	exact	Port Paterson			South Australia	https://gem.wiki/Port_Augusta_Renewable_Energy_Park_wind_farm	L906058	G908259	ES0144580Y14	1	210	210	2	2062	2102	2142	0	0	210	210	210	210	210	210	210	210	210	210
wind	Spain	Europe	Southern Europe	Pozocañada wind farm				24	operating	2001		onshore						Iberdrola Renovables Energia SA		38.7723	-1.739	exact			Albacete	Castile-La Mancha	https://gem.wiki/Pozocañada_wind_farm	L912500	G915617	ES0144580Y14	1	24	24	23	2041	2081	2121	24	24	24	24	24	24	24	24	24	24	24	24
wind	Spain	Europe	Southern Europe	Préjano wind farm				30	operating	2005		onshore						Iberdrola Renovables Energia SA		42.1481	-2.1966	exact				Rioja	https://gem.wiki/Préjano_wind_farm	L913352	G916611	ES0144580Y14	1	30	30	19	2045	2085	2125	30	30	30	30	30	30	30	30	30	30	30	30
wind	Spain	Europe	Southern Europe	Puerto Málaga wind farm	1		Puerto de Málaga	12	operating	2008		onshore						Iberdrola Renovables Energia SA		37.5251	-7.4925	exact		El Andévalo	Huelva	Andalusia	https://gem.wiki/Puerto_Málaga_wind_farm	L909193	G911933	ES0144580Y14	1	12	12	16	2048	2088	2128	12	12	12	12	12	12	12	12	12	12	12	12
wind	Spain	Europe	Southern Europe	Puylobo wind farm				49	operating	2020		onshore						Iberdrola Renovables Energia SA		41.8708	-1.4826	approximate	Borja		Zaragosa	Aragón	https://gem.wiki/Puylobo_wind_farm	L914812	G918327	ES0144580Y14	1	49	49	4	2060	2100	2140	49	49	49	49	49	49	49	49	49	49	49	49
wind	Spain	Europe	Southern Europe	Radona wind farm	1			24	operating	2009		onshore						Iberdrola Renovables Energia SA		41.2956	-2.4713	exact			Soria	Castile and León	https://gem.wiki/Radona_wind_farm	L912503	G915620	ES0144580Y14	1	56		15	2049	2089	2129	24	24	24	24	24	24	24	24	24	24	24	24
wind	Spain	Europe	Southern Europe	Radona wind farm	2			32	operating	2009		onshore						Iberdrola Renovables Energia SA		41.2956	-2.4713	exact			Soria	Castile and León	https://gem.wiki/Radona_wind_farm	L912503	G916838	ES0144580Y14	1	56	56	15	2049	2089	2129	32	32	32	32	32	32	32	32	32	32	32	32
wind	Spain	Europe	Southern Europe	Reventones wind farm				34	operating	2007		onshore						Iberdrola Renovables Energia SA		38.6856	-1.4043	exact	Jumilla	Altiplano	Region of Murcia	Region of Murcia	https://gem.wiki/Reventones_wind_farm	L913726	G917060	ES0144580Y14	1	34	34	17	2047	2087	2127	34	34	34	34	34	34	34	34	34	34	34	34
wind	Brazil	Americas	Latin America and the Caribbean	Rio Do Fogo wind farm	RN 15	Parque Eólico Rio do Fogo		49	operating	2006		onshore						Iberdrola Neoenergia		-5.3097	-35.3867	exact	Rio do Fogo		Região Geográfica Intermediária de Natal	Rio Grande do Norte	https://gem.wiki/Rio_Do_Fogo_wind_farm	L905339	G907103	ES0144580Y14	1	49	49	18	2046	2086	2126	49	49	49	49	49	49	49	49	49	49	49	49
wind	Spain	Europe	Southern Europe	Sabina wind farm				48	operating	2008		onshore						Iberdrola Renovables Energia SA		38.6317	-1.9251	exact			Albacete	Castile-La Mancha	https://gem.wiki/Sabina_wind_farm	L914739	G918234	ES0144580Y14	1	48	48	16	2048	2088	2128	48	48	48	48	48	48	48	48	48	48	48	48
wind	France	Europe	Western Europe	Saint-Brieuc wind farm				496	construction	2023		offshore hard mount						Iberdrola SA		48.5864	2.6807	approximate	Saint-Brieuc		Brittany		https://gem.wiki/Saint-Brieuc_wind_farm	L916208	G920006	ES0144580Y14	1	496	496	1	2063	2103	2143	0	0	0	496	496	496	496	496	496	496	496	496
wind	Spain	Europe	Southern Europe	San Borondón wind farm				238	pre-construction			offshore floating						Iberdrola Renovables Energia SA		27.7542	-15.3476	approximate	San Bartolomé de Tirajana		Gran Canaria	Las Islas Canarias	https://gem.wiki/San_Borondón_wind_farm	L916025	G919790	ES0144580Y14	1	238	238	-99	40	80	120	0	0	0	0	0	0	0	0	0	0	0	0
wind	Spain	Europe	Southern Europe	San Brandan Floating Offshore wind farm				490	pre-construction	2027		offshore floating						Iberdrola Renovables Energia SA		43.953	-8.3527	approximate					https://gem.wiki/San_Brandan_Floating_Offshore_wind_farm	L920783	G925605	ES0144580Y14	1	490		-3	2067	2107	2147	0	0	0	0	0	0	0	0	0	0	0	0
wind	Spain	Europe	Southern Europe	San Cibrao Floating Offshore wind farm				490	pre-construction	2027		offshore floating						Iberdrola Renovables Energia SA		43.9675	-7.4383	approximate					https://gem.wiki/San_Cibrao_Floating_Offshore_wind_farm	L920784	G925606	ES0144580Y14	1	490	490	-3	2067	2107	2147	0	0	0	0	0	0	0	0	0	0	0	0
wind	Spain	Europe	Southern Europe	San Cristobál (Iberdrola) wind farm				28	pre-construction			onshore						Iberdrola Renovables Energia SA		37.293	-4.878	approximate	Estepa		Sevilla	Andalucía	https://gem.wiki/San_Cristobál_(Iberdrola)_wind_farm	L913062	G916272	ES0144580Y14	1	28	28	-99	40	80	120	0	0	0	0	0	0	0	0	0	0	0	0
wind	Brazil	Americas	Latin America and the Caribbean	Santa Luzia wind farm	Canoas	Complexo Eólico Santa Luzia		32	operating	2017		onshore						Iberdrola Neoenergia		-6.8866	-36.7687	exact	São José do Sabugi	Região Metropolitana de Patos	Região Geográfica Intermediária de Campina Grande	Paraíba	https://gem.wiki/Santa_Luzia_wind_farm	L905340	G907104	ES0144580Y14	1	96		7	2057	2097	2137	32	32	32	32	32	32	32	32	32	32	32	32
wind	Brazil	Americas	Latin America and the Caribbean	Santa Luzia wind farm	Lagoa 1	Complexo Eólico Santa Luzia		32	operating	2017		onshore						Iberdrola Neoenergia		-6.8803	-36.8172	exact	Santa Luzia	Região Metropolitana de Patos	Região Geográfica Intermediária de Patos	Paraíba	https://gem.wiki/Santa_Luzia_wind_farm	L905340	G907105	ES0144580Y14	1	96		7	2057	2097	2137	32	32	32	32	32	32	32	32	32	32	32	32
wind	Brazil	Americas	Latin America and the Caribbean	Santa Luzia wind farm	Lagoa 2	Complexo Eólico Santa Luzia		32	operating	2017		onshore						Iberdrola Neoenergia		-6.8427	-36.7918	exact	São José do Sabugi	Região Metropolitana de Patos	Região Geográfica Intermediária de Patos	Paraíba	https://gem.wiki/Santa_Luzia_wind_farm	L905340	G907106	ES0144580Y14	1	96	96	7	2057	2097	2137	32	32	32	32	32	32	32	32	32	32	32	32
wind	Mexico	Americas	Latin America and the Caribbean	Santiago Eolico wind farm		Proyecto Eolico Santiago S Felipe		105	operating	2021		onshore						Iberdrola Renovables Energia SA		21.7134	-101.244	exact	San Felipe			Guanajuto	https://gem.wiki/Santiago_Eolico_wind_farm	L905347	G907118	ES0144580Y14	1	105	105	3	2061	2101	2141	0	105	105	105	105	105	105	105	105	105	105	105
wind	Japan	Asia	Eastern Asia	Satsuma Offshore wind farm		薩摩洋上風力発電事業	Satsuma Offshore Wind Power Project	600	shelved			offshore mount unknown						Iberdrola Renewables Japan; Mitsui Fudosan; Green Investment Group (GIG)		31.8195	130.144	approximate			Kagoshima Prefecture		https://gem.wiki/Satsuma_Offshore_wind_farm	L901167	G901360	ES0144580Y14	0.333333	600	600	-99	40	80	120	0	0	0	0	0	0	0	0	0	0	0	0
wind	Spain	Europe	Southern Europe	Savalla wind farm				18	operating			onshore						Iberdrola Renovables Energia SA		41.5382	1.2842	exact	Savallà del Comtat	Conca de Barberà	Tarragona	Catalonia	https://gem.wiki/Savalla_wind_farm	L911221	G914177	ES0144580Y14	1	18	18	-99	40	80	120	18	18	18	18	18	18	18	18	18	18	18	18
wind	Hungary	Europe	Eastern Europe	Scott wind farm			Scott Iberdrola	36	operating	2011		onshore						Iberdrola Renovables Energia SA		47.6347	18.0772	approximate	Nagyigmand	Komaron-Esztergom			https://gem.wiki/Scott_wind_farm	L913938	G917302	ES0144580Y14	1	36	36	13	2051	2091	2131	36	36	36	36	36	36	36	36	36	36	36	36
wind	Japan	Asia	Eastern Asia	Seihoku-Oki Offshore wind farm	1	青森西北沖洋上風力, 青森西北沖洋上風力発電事業	Seihoku-oki offshore wind farm, Nishikita wind park, Aomori Northwest offshore wind farm	600	pre-construction	2025		offshore mount unknown						Cosmo Eco Power CO LTD; Iberdrola Renewables Japan; Hitachi Zosen Inova AG		40.926	140.233	approximate	Nakadomari	Kitatsugaru District	Aomori Prefecture		https://gem.wiki/Seihoku-Oki_Offshore_wind_farm	L900719	G900822	ES0144580Y14	0.333333	600	600	-1	2065	2105	2145	0	0	0	0	0	0	0	0	0	0	0	0
wind	Spain	Europe	Southern Europe	Serra Da Panda wind farm			Coriscada II	18	operating	2002		onshore						Iberdrola Renovables Energia SA		43.6389	-7.7588	exact		Ortegal		Galicia	https://gem.wiki/Serra_Da_Panda_wind_farm	L911229	G914187	ES0144580Y14	1	18	18	22	2042	2082	2122	18	18	18	18	18	18	18	18	18	18	18	18
wind	Spain	Europe	Southern Europe	Serra De Meira wind farm				49	operating	2005		onshore						Iberdrola Renovables Energia SA		43.2134	-7.2937	exact	Meira	Meira		Galicia	https://gem.wiki/Serra_De_Meira_wind_farm	L914816	G918336	ES0144580Y14	1	49	49	19	2045	2085	2125	49	49	49	49	49	49	49	49	49	49	49	49
wind	Portugal	Europe	Southern Europe	Serra Do Alvão wind farm			Parque Eólico Serra do Alvão	42	operating	2009		onshore						Iberdrola Renovables Energia SA		41.4167	-7.7355	exact	Vila Real	Vila Real			https://gem.wiki/Serra_Do_Alvão_wind_farm	L914398	G917843	ES0144580Y14	1	42	42	15	2049	2089	2129	42	42	42	42	42	42	42	42	42	42	42	42
wind	Spain	Europe	Southern Europe	Serra Do Burgo wind farm	1			16	operating	2002		onshore						Iberdrola Renovables Energia SA		42.3301	-7.4101	exact	Castro Caldelas	Terra de Caldelas		Galicia	https://gem.wiki/Serra_Do_Burgo_wind_farm	L909256	G913543	ES0144580Y14	1	28		22	2042	2082	2122	16	16	16	16	16	16	16	16	16	16	16	16
wind	Spain	Europe	Southern Europe	Serra Do Burgo wind farm	Amplicación			12	operating	2004		onshore						Iberdrola Renovables Energia SA		42.2501	-7.3833	exact	Chandrexa de Queixa	Terra de Trives		Galicia	https://gem.wiki/Serra_Do_Burgo_wind_farm	L909256	G912000	ES0144580Y14	1	28	28	20	2044	2084	2124	12	12	12	12	12	12	12	12	12	12	12	12
wind	Spain	Europe	Southern Europe	Serra Do Larouco wind farm			Larouco	42	operating	2002		onshore						Iberdrola Renovables Energia SA		42.0635	-7.7246	exact	Xinzo de Limia	A Limia		Galicia	https://gem.wiki/Serra_Do_Larouco_wind_farm	L914399	G917844	ES0144580Y14	1	42	42	22	2042	2082	2122	42	42	42	42	42	42	42	42	42	42	42	42
wind	Ireland	Europe	Northern Europe	Shelmalere wind farm				1000	announced			offshore hard mount						DP Energy; Iberdrola SA		52.3401	-6.0701	approximate					https://gem.wiki/Shelmalere_wind_farm	L916302	G920116	ES0144580Y14	0.5	1000	1000	-99	40	80	120	0	0	0	0	0	0	0	0	0	0	0	0
wind	Spain	Europe	Southern Europe	Sierra De Dueña wind farm				31	operating	2004		onshore						Iberdrola Renovables Energia SA		40.6901	-5.8201	approximate	Las Veguillas		Salamanca	Castilla y León	https://gem.wiki/Sierra_De_Dueña_wind_farm	L913453	G916729	ES0144580Y14	1	31	31	20	2044	2084	2124	31	31	31	31	31	31	31	31	31	31	31	31
wind	Spain	Europe	Southern Europe	Sierra De La Oliva wind farm	1		Oliva	47	operating	2005		onshore						Iberdrola Renovables Energia SA		38.7388	-1.0288	exact	Almansa		Albacete	Castile-La Mancha	https://gem.wiki/Sierra_De_La_Oliva_wind_farm	L913366	G918127	ES0144580Y14	1	47	47	19	2045	2085	2125	47	47	47	47	47	47	47	47	47	47	47	47
wind	Spain	Europe	Southern Europe	Sierra De Las Cabras (Iberdrola) wind farm				22	operating	2012		onshore						Iberdrola Renovables Energia SA		38.4919	-1.401	exact	Jumilla	Altiplano	Region of Murcia	Region of Murcia	https://gem.wiki/Sierra_De_Las_Cabras_(Iberdrola)_wind_farm	L912125	G915196	ES0144580Y14	1	22	22	12	2052	2092	2132	22	22	22	22	22	22	22	22	22	22	22	22
wind	Spain	Europe	Southern Europe	Sierra De Mira wind farm			Mira	38	operating	2002		onshore						Iberdrola Renovables Energia SA		39.7283	-1.3816	exact			Cuenca	Castile-La Mancha	https://gem.wiki/Sierra_De_Mira_wind_farm	L914095	G917480	ES0144580Y14	1	38	38	22	2042	2082	2122	38	38	38	38	38	38	38	38	38	38	38	38
wind	Spain	Europe	Southern Europe	Sierra De Pinilla wind farm			Pinilla	23	operating	2002		onshore						Iberdrola Renovables Energia SA		38.716	-1.6022	exact	Chinchilla de Monte-Aragón		Albacete	Castile-La Mancha	https://gem.wiki/Sierra_De_Pinilla_wind_farm	L912273	G915364	ES0144580Y14	1	23	23	22	2042	2082	2122	23	23	23	23	23	23	23	23	23	23	23	23
wind	Spain	Europe	Southern Europe	Sierra Del Buey wind farm				20	operating	2003		onshore						Iberdrola Renovables Energia SA		38.5201	-1.2411	exact	Jumilla	Altiplano	Region of Murcia	Region of Murcia	https://gem.wiki/Sierra_Del_Buey_wind_farm	L911694	G914707	ES0144580Y14	1	20	20	21	2043	2083	2123	20	20	20	20	20	20	20	20	20	20	20	20
wind	Spain	Europe	Southern Europe	Sierra Del Escudo wind farm			El Escudo	105	construction			onshore						Iberdrola Renovables Energia SA		43.0306	-3.9893	approximate	Campoo de Yuso			Cantabria	https://gem.wiki/Sierra_Del_Escudo_wind_farm	L915896	G919642	ES0144580Y14	1	105	105	-99	40	80	120	0	0	0	0	0	0	0	105	105	105	105	105
wind	Spain	Europe	Southern Europe	Sierra Del Romeral wind farm				24	operating	2003		onshore						Iberdrola Renovables Energia SA		39.6527	-3.3903	exact		Mancha Alta de Toledo	Toledo	Castile-La Mancha	https://gem.wiki/Sierra_Del_Romeral_wind_farm	L912524	G915646	ES0144580Y14	1	24	24	21	2043	2083	2123	24	24	24	24	24	24	24	24	24	24	24	24
wind	Spain	Europe	Southern Europe	Sierra Quemada wind farm				26	operating	2001		onshore						Iberdrola Renovables Energia SA		38.7269	-1.9259	exact			Albacete	Castile-La Mancha	https://gem.wiki/Sierra_Quemada_wind_farm	L912835	G916003	ES0144580Y14	1	26	26	23	2041	2081	2121	26	26	26	26	26	26	26	26	26	26	26	26
wind	Spain	Europe	Southern Europe	Sierro wind farm				20	operating	2004		onshore						Iberdrola Renovables Energia SA		41.3001	-2.9952	exact			Soria	Castile and León	https://gem.wiki/Sierro_wind_farm	L911696	G914709	ES0144580Y14	1	20	20	20	2044	2084	2124	20	20	20	20	20	20	20	20	20	20	20	20
wind	Spain	Europe	Southern Europe	Sil wind farm	1			49	operating	2004		onshore						Iberdrola Renovables Energia SA		42.3654	-7.6654	exact	Nogueira de Remuín		Ourense	Galicia	https://gem.wiki/Sil_wind_farm	L909260	G912004	ES0144580Y14	1	89		20	2044	2084	2124	49	49	49	49	49	49	49	49	49	49	49	49
wind	Spain	Europe	Southern Europe	Sil wind farm	1 Amplicación			28	operating	2007		onshore						Iberdrola Renovables Energia SA		42.4101	-7.7301	approximate	Esgos	Ourense		Galicia	https://gem.wiki/Sil_wind_farm	L909260	G918338	ES0144580Y14	1	89		17	2047	2087	2127	28	28	28	28	28	28	28	28	28	28	28	28
wind	Spain	Europe	Southern Europe	Sil wind farm	2 Amplicación			12	operating	2010		onshore						Iberdrola Renovables Energia SA		42.4131	-7.7261	approximate	Nogueira		Ourense	Galicia	https://gem.wiki/Sil_wind_farm	L909260	G916276	ES0144580Y14	1	89	89	14	2050	2090	2130	12	12	12	12	12	12	12	12	12	12	12	12
wind	Spain	Europe	Southern Europe	Somolinos wind farm				11	operating	2006		onshore						Iberdrola Renovables Energia SA		41.2822	-3.0885	exact	Somolinos		Guadalajara	Castile-La Mancha	https://gem.wiki/Somolinos_wind_farm	L908526	G911228	ES0144580Y14	1	11	11	18	2046	2086	2126	11	11	11	11	11	11	11	11	11	11	11	11
wind	Spain	Europe	Southern Europe	Tacica De Plata wind farm				26	operating	2008		onshore						Iberdrola Renovables Energia SA		37.1494	-2.7399	exact	Las Tres Villas		Almeria	Andalusia	https://gem.wiki/Tacica_De_Plata_wind_farm	L912842	G916011	ES0144580Y14	1	26	26	16	2048	2088	2128	26	26	26	26	26	26	26	26	26	26	26	26
wind	Portugal	Europe	Southern Europe	Tâmega wind farm	Norte		Complexo Eólico Tâmega	150	pre-construction	2024		onshore						Iberdrola Renovables Energia SA		41.8097	-7.4126	approximate	Chaves		Chaves	Norte	https://gem.wiki/Tâmega_wind_farm	L916002	G919764	ES0144580Y14	1	300		0	2064	2104	2144	0	0	0	0	0	0	0	0	0	0	0	0
wind	Portugal	Europe	Southern Europe	Tâmega wind farm	Sul		Complexo Eólico Tâmega	150	pre-construction	2024		onshore						Iberdrola Renovables Energia SA		41.8097	-7.4126	approximate	Chaves		Chaves	Norte	https://gem.wiki/Tâmega_wind_farm	L916002	G919800	ES0144580Y14	1	300	300	0	2064	2104	2144	0	0	0	0	0	0	0	0	0	0	0	0
wind	Spain	Europe	Southern Europe	Tarayuela wind farm				30	operating	2006		onshore						Iberdrola Renovables Energia SA		41.4401	-2.3701	exact	Soliedra		Soria	Castile and León	https://gem.wiki/Tarayuela_wind_farm	L913381	G916645	ES0144580Y14	1	30	30	18	2046	2086	2126	30	30	30	30	30	30	30	30	30	30	30	30
wind	Spain	Europe	Southern Europe	Tardienta wind farm	1			50	operating	2001		onshore						Iberdrola Renovables Energia SA		41.924	-0.582	exact		Los Monegros		Aragon	https://gem.wiki/Tardienta_wind_farm	L914487	G918633	ES0144580Y14	1	94		23	2041	2081	2121	50	50	50	50	50	50	50	50	50	50	50	50
wind	Spain	Europe	Southern Europe	Tardienta wind farm	2			44	operating	2001		onshore						Iberdrola Renovables Energia SA		41.911	-0.561	exact		Los Monegros		Aragon	https://gem.wiki/Tardienta_wind_farm	L914487	G917947	ES0144580Y14	1	94	94	23	2041	2081	2121	44	44	44	44	44	44	44	44	44	44	44	44
wind	Spain	Europe	Southern Europe	Urbel Del Castillo wind farm	2			50	operating	2006		onshore						Iberdrola Renovables Energia SA		42.5843	-3.8016	exact	Úrbel del Castillo		Burgos	Castile and León	https://gem.wiki/Urbel_Del_Castillo_wind_farm	L915071	G918657	ES0144580Y14	1	50	50	18	2046	2086	2126	50	50	50	50	50	50	50	50	50	50	50	50
wind	Spain	Europe	Southern Europe	Valdecarrión wind farm				34	operating	2010		onshore						Iberdrola Renovables Energia SA		42.6401	-6.1101	exact	Villagatón		León	Castile and León	https://gem.wiki/Valdecarrión_wind_farm	L913735	G917071	ES0144580Y14	1	34	34	14	2050	2090	2130	34	34	34	34	34	34	34	34	34	34	34	34
wind	Spain	Europe	Southern Europe	Valdefuentes wind farm				28	operating	2009		onshore						Iberdrola Renovables Energia SA		37.5076	-7.2704	exact	El Almendro	El Andévalo	Huelva	Andalusia	https://gem.wiki/Valdefuentes_wind_farm	L913076	G916288	ES0144580Y14	1	28	28	15	2049	2089	2129	28	28	28	28	28	28	28	28	28	28	28	28
wind	Spain	Europe	Southern Europe	Valdelanave wind farm				10	operating	2012		onshore						Iberdrola Renovables Energia SA		41.5248	-5.9675	approximate	Muelas del Pan		Zamora	Castilla y León	https://gem.wiki/Valdelanave_wind_farm	L908215	G910906	ES0144580Y14	1	10	10	12	2052	2092	2132	10	10	10	10	10	10	10	10	10	10	10	10
wind	Spain	Europe	Southern Europe	Valdemoro wind farm				50	construction	2023		onshore						Iberdrola Renovables Energia SA		42.475	-3.8347	approximate	Valle de Santibáñez		Burgos	Castilla y León	https://gem.wiki/Valdemoro_wind_farm	L915074	G918660	ES0144580Y14	1	50	50	1	2063	2103	2143	0	0	0	50	50	50	50	50	50	50	50	50
wind	Spain	Europe	Southern Europe	Valdeperondo wind farm				46	operating	2010		onshore						Iberdrola Renovables Energia SA		42.372	-5.0304	approximate	Cea		León	Castilla y León	https://gem.wiki/Valdeperondo_wind_farm	L914619	G918099	ES0144580Y14	1	46	46	14	2050	2090	2130	46	46	46	46	46	46	46	46	46	46	46	46
wind	Spain	Europe	Southern Europe	Valdeporres wind farm				31	operating	2004		onshore						Iberdrola Renovables Energia SA		43.0206	-3.7686	approximate	Merindad de Valdeporres		Burgos	Castilla y León	https://gem.wiki/Valdeporres_wind_farm	L913455	G916732	ES0144580Y14	1	31	31	20	2044	2084	2124	31	31	31	31	31	31	31	31	31	31	31	31
wind	Spain	Europe	Southern Europe	Valdesantos wind farm			Herrera II (Valdesantos)	13	operating	2021		onshore						Iberdrola Renovables Energia SA		42.3616	-3.9304	approximate	Isar		Burgos	Castilla y León	https://gem.wiki/Valdesantos_wind_farm	L909652	G912424	ES0144580Y14	1	13	13	3	2061	2101	2141	0	13	13	13	13	13	13	13	13	13	13	13
wind	Spain	Europe	Southern Europe	Valmediano wind farm				34	operating	2003		onshore						Iberdrola Renovables Energia SA		41.8347	-5.8888	exact			Zamora	Castile and León	https://gem.wiki/Valmediano_wind_farm	L913736	G917072	ES0144580Y14	1	34	34	21	2043	2083	2123	34	34	34	34	34	34	34	34	34	34	34	34
wind	Spain	Europe	Southern Europe	Ventosa Del Ducado wind farm				44	operating	2012		onshore						Iberdrola Renovables Energia SA		41.1946	-2.5112	exact			Soria	Castile and León	https://gem.wiki/Ventosa_Del_Ducado_wind_farm	L914491	G917951	ES0144580Y14	1	44	44	12	2052	2092	2132	44	44	44	44	44	44	44	44	44	44	44	44
wind	Spain	Europe	Southern Europe	Verdigueiro wind farm				36	construction			onshore						Iberdrola Renovables Energia SA		43.3093	-6.492	approximate	Tineo			Asturias	https://gem.wiki/Verdigueiro_wind_farm	L913953	G917319	ES0144580Y14	1	36	36	-99	40	80	120	0	0	0	0	0	0	0	36	36	36	36	36
wind	Spain	Europe	Southern Europe	Vieiro wind farm			O Vieiro	20	operating	2008		onshore						Iberdrola Renovables Energia SA		42.0948	-7.9892	exact	Verea	Terra da Celanova		Galicia	https://gem.wiki/Vieiro_wind_farm	L911724	G914739	ES0144580Y14	1	20	20	16	2048	2088	2128	20	20	20	20	20	20	20	20	20	20	20	20
wind	Spain	Europe	Southern Europe	Villarino Wind Complex				300	pre-construction			onshore						Iberdrola Renovables Energia SA		40.9652	-5.664	approximate	Arribes del Duero		Salamanca	Castilla y León	https://gem.wiki/Villarino_Wind_Complex	L916107	G919884	ES0144580Y14	1	300	300	-99	40	80	120	0	0	0	0	0	0	0	0	0	0	0	0
wind	Spain	Europe	Southern Europe	Virgen De Belén wind farm	2			24	operating	2000		onshore						Iberdrola Renovables Energia SA		38.9185	-1.2954	exact			Albacete	Castile-La Mancha	https://gem.wiki/Virgen_De_Belén_wind_farm	L908224	G915670	ES0144580Y14	1	57		24	2040	2080	2120	24	24	24	24	24	24	24	24	24	24	24	24
wind	Spain	Europe	Southern Europe	Virgen De Belén wind farm	1			23	operating	2001		onshore						Iberdrola Renovables Energia SA		38.872	-1.3177	exact			Albacete	Castile-La Mancha	https://gem.wiki/Virgen_De_Belén_wind_farm	L908224	G915382	ES0144580Y14	1	57		23	2041	2081	2121	23	23	23	23	23	23	23	23	23	23	23	23
wind	Spain	Europe	Southern Europe	Virgen De Belén wind farm	1 Ampliación			10	operating			onshore						Iberdrola Renovables Energia SA		38.8652	-1.3317	exact			Albacete	Castile-La Mancha	https://gem.wiki/Virgen_De_Belén_wind_farm	L908224	G910917	ES0144580Y14	1	57	57	-99	40	80	120	10	10	10	10	10	10	10	10	10	10	10	10
wind	Spain	Europe	Southern Europe	Virgen De Los Llanos wind farm	1			26	operating	1999		onshore						Iberdrola Renovables Energia SA		38.9787	-1.422	exact			Albacete	Castile-La Mancha	https://gem.wiki/Virgen_De_Los_Llanos_wind_farm	L912290	G916026	ES0144580Y14	1	49		25	2039	2079	2119	26	26	26	26	26	26	26	26	26	26	26	26
wind	Spain	Europe	Southern Europe	Virgen De Los Llanos wind farm	2			23	operating	1999		onshore						Iberdrola Renovables Energia SA		38.9787	-1.422	exact			Albacete	Castile-La Mancha	https://gem.wiki/Virgen_De_Los_Llanos_wind_farm	L912290	G915383	ES0144580Y14	1	49	49	25	2039	2079	2119	23	23	23	23	23	23	23	23	23	23	23	23
wind	Spain	Europe	Southern Europe	Viveiro wind farm				37	operating	2003		onshore						Iberdrola Renovables Energia SA		43.641	-7.5461	exact		A Mariña Occidental		Galicia	https://gem.wiki/Viveiro_wind_farm	L914009	G917383	ES0144580Y14	1	37	37	21	2043	2083	2123	37	37	37	37	37	37	37	37	37	37	37	37
wind	Australia	Oceania	Australia and New Zealand	Walkaway wind farm	1		Alinta wind farm	89	operating	2006		onshore						Iberdrola Australia		-28.8988	114.869	exact				Western Australia	https://gem.wiki/Walkaway_wind_farm	L906060	G908262	ES0144580Y14	1	89	89	18	2046	2086	2126	89	89	89	89	89	89	89	89	89	89	89	89
wind	Germany	Europe	Western Europe	Wikinger Süd wind farm				10	pre-construction			offshore hard mount						Iberdrola Renovables Energia SA		54.82	14.12	exact					https://gem.wiki/Wikinger_SüD_wind_farm	L920285	G924941	ES0144580Y14	1	10	10	-99	40	80	120	0	0	0	0	0	0	0	0	0	0	0	0
wind	Germany	Europe	Western Europe	Wikinger wind farm				350	operating	2018		offshore hard mount						Iberdrola Renovables Energia SA [51%]; Energy Infrastructure Partners (EIP) [49%]		54.834	14.068	exact					https://gem.wiki/Wikinger_wind_farm	L916140	G919927	ES0144580Y14	0.5	350	350	6	2058	2098	2138	175	175	175	175	175	175	175	175	175	175	175	175
wind	Germany	Europe	Western Europe	Windanker wind farm				300	pre-construction	2026		offshore hard mount						Iberdrola Renovables Energia SA		54.8353	13.9727	approximate					https://gem.wiki/Windanker_wind_farm	L916109	G919886	ES0144580Y14	1	300	300	-2	2066	2106	2146	0	0	0	0	0	0	0	0	0	0	0	0
wind	Australia	Oceania	Australia and New Zealand	Woakwine wind farm				274	pre-construction	2026		onshore						Iberdrola Australia		-37.3843	140.069	approximate		Woakwine Range		South Australia	https://gem.wiki/Woakwine_wind_farm	L906067	G908269	ES0144580Y14	1	274	274	-2	2066	2106	2146	0	0	0	0	0	0	0	0	0	0	0	0
wind	Spain	Europe	Southern Europe	Yerga wind farm	1			24	operating	2000		onshore						Iberdrola Renovables Energia SA		42.1515	-1.9638	exact				Rioja	https://gem.wiki/Yerga_wind_farm	L912550	G915678	ES0144580Y14	1	55		24	2040	2080	2120	24	24	24	24	24	24	24	24	24	24	24	24
wind	Spain	Europe	Southern Europe	Yerga wind farm	2			31	operating	2002		onshore						Iberdrola Renovables Energia SA		42.1435	-1.9561	exact				Rioja	https://gem.wiki/Yerga_wind_farm	L912550	G916734	ES0144580Y14	1	55	55	22	2042	2082	2122	31	31	31	31	31	31	31	31	31	31	31	31
wind	Poland	Europe	Eastern Europe	Zopowy wind farm				30	operating			onshore						Iberdrola		50.1544	17.7577	approximate	Opole		Opole County	Opole Voivodeship	https://gem.wiki/Zopowy_wind_farm	L913412	G916678	ES0144580Y14	1	30	30	-99	40	80	120	30	30	30	30	30	30	30	30	30	30	30	30
wind	Spain	Europe	Southern Europe	Zorreras wind farm			Zorreras 1	32	operating	2007		onshore						Iberdrola Renovables Energia SA		36.4634	-5.9452	approximate	Medina-Sidonia		Cádiz	Andalucía	https://gem.wiki/Zorreras_wind_farm	L913557	G916857	ES0144580Y14	1	32	32	17	2047	2087	2127	32	32	32	32	32	32	32	32	32	32	32	32
																																			358	0	0	26750.3	27962.3	29601.5	31848.5	32078.5	32078.5	32078.5	34328.1	34328.1	34328.1	34328.1	34328.1
																																					Coal	358	0	0	0	0	0	0	0	0	0	0	0
																																					Oil&Gas	7280.3	7280.3	7280.3	7280.3	7280.3	7280.3	7280.3	7280.3	7280.3	7280.3	7280.3	7280.3
																																					Fossil fuel	7638.3	7280.3	7280.3	7280.3	7280.3	7280.3	7280.3	7280.3	7280.3	7280.3	7280.3	7280.3
																																					Renewables	15988.8	17558.8	19198	21445	21675	21675	21675	23924.6	23924.6	23924.6	23924.6	23924.6
																																					Oil	0	0	0	0	0	0	0	0	0	0	0	0
																																					Gas	7280.3	7280.3	7280.3	7280.3	7280.3	7280.3	7280.3	7280.3	7280.3	7280.3	7280.3	7280.3
																																					Nuclear	3123.17	3123.17	3123.17	3123.17	3123.17	3123.17	3123.17	3123.17	3123.17	3123.17	3123.17	3123.17
																																					Wind	8438	9183	9527.6	10749.6	10769.6	10769.6	10769.6	10910.6	10910.6	10910.6	10910.6	10910.6
																																					solar	1115.8	1940.8	2897.4	3922.4	3972.4	3972.4	3972.4	6081	6081	6081	6081	6081
																																					hydropower	6435	6435	6773	6773	6933	6933	6933	6933	6933	6933	6933	6933
																																					Total capacity without discounts	30280.1	31492.1	33131.3	35482.3
																																					Total capacity without discounts	7687.3	7329.3	7329.3	7329.3
[truncated: 19 more columns]

## Sheet: Iberdrola_TP
Type	Country/area	Region	Subregion	Plant / Project name	Unit / Phase name	Plant / Project name (local)	Plant / Project name (other)	Capacity (MW)	Status	Start year	Retired year	Technology	Fuel	Country/area 1 (hydropower only)	Country/area 2 (hydropower only)	Country/area 1 Capacity (MW) (hydropower only)	Country/area 2 Capacity (MW) (hydropower only)	Owner	Parent	Latitude	Longitude	Location accuracy	City	Local area (taluk, county)	Major area (prefecture, district)	Subnational unit (state, province)	GEM.Wiki URL	GEM location ID	GEM unit/phase ID	CompISIN	Ownership	Plant capacity	Plant capacity	Age	Reinvestment year	Reinvestment year	Reinvestment year	2020	2021	2022	2023	2024	2025	2026	2027	2028	2029	2030	2031
coal	Spain	Europe	Southern Europe	Lada power station	Unit 4			358	retired	1981	2021	subcritical	bituminous					Iberdrola [100%]	Iberdrola [100.0%]	43.2964	-5.68254	exact	Langreo			Asturias	https://www.gem.wiki/Lada_power_station	L100000103501	G100000106088	ES0144580Y14	1	358	358	43	2021	2061	2101	358	0	0	0	0	0	0	0	0	0	0	0
oil/gas	Spain	Europe	Southern Europe	Aceca 3 power station	1			386	operating	2005		CC	NG					Iberdrola Generacion SA [100.0%]	Iberdrola SA [100.0%]	39.9442	-3.8558	exact	Villaseca de la Sagra			Toledo	https://www.gem.wiki/Aceca_3_power_station	L100000400644	G100000400644	ES0144580Y14	1	386	386	19	2045	2085	2125	386	386	386	386	386	386	386	386	386	0	0	0
oil/gas	Mexico	Americas	Latin America and the Caribbean	Altamira Dynasol cogeneration power station	1	Planta de Cogeneración Altamira Dynasol		57	operating	2017		CC	NG					Iberdrola Generación México [100%]; Iberdrola Cogeneración Altamira SA de CV	Iberdrola SA [100.0%]; Iberdrola Cogeneración Altamira SA de CV	22.4474	-97.9705	exact	Altamira			Tamaulipas	https://www.gem.wiki/Altamira_Dynasol_cogeneration_power_station	L100000406694	G100000406952	ES0144580Y14	1	57	57	7	2057	2097	2137	57	57	57	57	57	57	57	57	57	57	57	0
oil/gas	Spain	Europe	Southern Europe	Arcos de la Frontera power station	CC-1			389.2	operating	2005		CC	NG					Iberdrola Generacion SA [100.0%]	Iberdrola SA [100.0%]	36.6721	-5.8164	exact	Arcos de La Frontera			Cadiz	https://www.gem.wiki/Arcos_de_la_Frontera_power_station	L100000400649	G100000400649	ES0144580Y14	1	1585.4		19	2045	2085	2125	389.2	389.2	389.2	389.2	389.2	389.2	389.2	389.2	389.2	0	0	0
oil/gas	Spain	Europe	Southern Europe	Arcos de la Frontera power station	CC-2			373.2	operating	2005		CC	NG					Iberdrola Generacion SA [100.0%]	Iberdrola SA [100.0%]	36.6721	-5.8164	exact	Arcos de La Frontera			Cadiz	https://www.gem.wiki/Arcos_de_la_Frontera_power_station	L100000400649	G100000400650	ES0144580Y14	1	1585.4		19	2045	2085	2125	373.2	373.2	373.2	373.2	373.2	373.2	373.2	373.2	373.2	0	0	0
oil/gas	Spain	Europe	Southern Europe	Arcos de la Frontera power station	CC-3			823	operating	2005		CC	NG					Iberdrola Generacion SA [100.0%]	Iberdrola SA [100.0%]	36.6721	-5.8164	exact	Arcos de La Frontera			Cadiz	https://www.gem.wiki/Arcos_de_la_Frontera_power_station	L100000400649	G100000400651	ES0144580Y14	1	1585.4	1585.4	19	2045	2085	2125	823	823	823	823	823	823	823	823	823	0	0	0
oil/gas	Mexico	Americas	Latin America and the Caribbean	Bajío cogeneration power station	1	Planta de Cogeneración Bajío	Kimberly-Clark San Juan/Cogeneración Bajío	52	operating	2018		CC	NG					Iberdrola Generación México [100%]	Iberdrola SA [100.0%]	20.381	-99.9777	exact	San Juan del Río			Querétaro	https://www.gem.wiki/Bajío_cogeneration_power_station	L100000406190	G100000406531	ES0144580Y14	1	52	52	6	2058	2098	2138	52	52	52	52	52	52	52	52	52	52	52	0
oil/gas	Spain	Europe	Southern Europe	Castejón power station	2	Central térmica Castejón; CICLO COMBINADO DE CASTEJON		378.9	operating	2003		CC	NG					Iberdrola SA [100.0%]	Iberdrola SA [100.0%]	42.1718	-1.6773	exact	Castejon			Navarra	https://www.gem.wiki/Castejón_power_station	L100000400666	G100000400667	ES0144580Y14	1	378.9	378.9	21	2043	2083	2123	378.9	378.9	378.9	378.9	378.9	378.9	378.9	378.9	0	0	0	0
oil/gas	Spain	Europe	Southern Europe	Castellón power station	3			782	operating	2002		CC	NG					Iberdrola Generacion SA [100.0%]	Iberdrola SA [100.0%]	39.9592	-0.001	exact	Castelló de la Plana			Castellon	https://www.gem.wiki/Castellón_power_station	L100000400670	G100000400670	ES0144580Y14	1	1640		22	2042	2082	2122	782	782	782	782	782	782	782	782	0	0	0	0
oil/gas	Spain	Europe	Southern Europe	Castellón power station	4			858	operating	2008		CC	NG					Iberdrola Generacion SA [100.0%]	Iberdrola SA [100.0%]	39.9592	-0.001	exact	Castelló de la Plana			Castellon	https://www.gem.wiki/Castellón_power_station	L100000400670	G100000400671	ES0144580Y14	1	1640	1640	16	2048	2088	2128	858	858	858	858	858	858	858	858	858	858	0	0
oil/gas	Mexico	Americas	Latin America and the Caribbean	Dulces Nombres II power station	1	Planta CC Dulces Nombres II	Monterrey V	300	operating	2016		CC	NG					Iberdrola Generación México [100%]	Iberdrola SA [100.0%]	25.7175	-100.096	exact	Dulces Nombres	Pesquería		Nuevo León	https://gem.wiki/Dulces_Nombres_II_power_station	L100000406205	G100000406518	ES0144580Y14	1	300	300	8	2056	2096	2136	300	300	300	300	300	300	300	300	300	300	300	0
oil/gas	Mexico	Americas	Latin America and the Caribbean	El Carmen Nuevo Leon power station	1	Planta CC El Carmen	El Carmen	866	operating	2019		CC	NG					Iberdrola México SA de CV [100%]	Iberdrola SA [100.0%]	25.87	-100.359	approximate	El Carmen			Nuevo León	https://gem.wiki/El_Carmen_Nuevo_Leon_power_station	L100000406652	G100000401028	ES0144580Y14	1	866	866	5	2059	2099	2139	866	866	866	866	866	866	866	866	866	866	866	0
oil/gas	Spain	Europe	Southern Europe	Enercrisa power station	1			21	operating	2009		CC	NG					Enercrisa SA [100.0%]	Grupo Industrial Crimidesa SL [50.0%]; Iberdrola SA [50.0%]	42.4838	-3.15084	exact	Cerezo de Rio Tiron			Burgos	https://www.gem.wiki/Enercrisa_power_station	L100000400679	G100000400679	ES0144580Y14	0.5	21	21	15	2049	2089	2129	10.5	10.5	10.5	10.5	10.5	10.5	10.5	10.5	10.5	10.5	0	0
oil/gas	Spain	Europe	Southern Europe	Escombreras Iberdrola power station	6			816	operating	2006		CC	NG					Iberdrola SA [100.0%]	Iberdrola SA [100.0%]	37.5647	-0.95132	exact	Cartagena			Murcia	https://www.gem.wiki/Escombreras_Iberdrola_power_station	L100000400682	G100000400682	ES0144580Y14	1	816	816	18	2046	2086	2126	816	816	816	816	816	816	816	816	816	816	0	0
oil/gas	Spain	Europe	Southern Europe	Fuenlabrada Mill power station	1		International Paper Madrid Mill	43	operating	2001		CC	NG					Iberdrola SA [50.0%]; International Paper Co [50.0%]	Iberdrola SA [50.0%]	40.269	-3.77064	exact	Fuenlabrada			Madrid	https://www.gem.wiki/Fuenlabrada_Mill_power_station	L100000400684	G100000400684	ES0144580Y14	0.5	43	43	23	2041	2081	2121	21.5	21.5	21.5	21.5	21.5	21.5	21.5	21.5	0	0	0	0
oil/gas	Spain	Europe	Southern Europe	Michelin Aranda power station	1			32	operating	2003		CC	NG					Energyworks Aranda Sl [100.0%]	Iberdrola SA [100.0%]	41.6629	-3.71	exact	Aranda de Duero			Burgos	https://www.gem.wiki/Michelin_Aranda_power_station	L100000400690	G100000400690	ES0144580Y14	1	32	32	21	2043	2083	2123	32	32	32	32	32	32	32	32	0	0	0	0
oil/gas	Spain	Europe	Southern Europe	Michelin Valladolid power station	1			46	operating	2000		CC	NG					Energyworks Vit-vall Sl [100.0%]	Iberdrola SA [100.0%]	41.6753	-4.71607	exact	Valladolid			Valladolid	https://www.gem.wiki/Michelin_Valladolid_power_station	L100000400691	G100000400691	ES0144580Y14	1	46	46	24	2040	2080	2120	46	46	46	46	46	46	46	0	0	0	0	0
oil/gas	Spain	Europe	Southern Europe	Neumaticos Michelin Vitoria power station	1			47	operating	2000		CC	NG					Energyworks Vit-vall Sl [100.0%]	Iberdrola SA [100.0%]	42.8667	-2.67174	exact	Vitoria-Gasteiz			Araba	https://www.gem.wiki/Neumaticos_Michelin_Vitoria_power_station	L100000400694	G100000400694	ES0144580Y14	1	47	47	24	2040	2080	2120	47	47	47	47	47	47	47	0	0	0	0	0
oil/gas	Spain	Europe	Southern Europe	Peninsular de Cogeneracion Mill power station	1			34	operating	2010		CC	NG					Peninsular de Cogeneracion SA [100.0%]	Iberdrola SA [50.0%]; International Paper Co [50.0%]	40.2709	-3.76811	exact	Madrid			Madrid	https://www.gem.wiki/Peninsular_de_Cogeneracion_Mill_power_station	L100000407786	G100000410351	ES0144580Y14	0.5	34	34	14	2050	2090	2130	17	17	17	17	17	17	17	17	17	17	17	0
oil/gas	Mexico	Americas	Latin America and the Caribbean	Ramos cogeneration power station	1	Planta de Cogeneración Ramos	Kimberly-Clark Ramos	52	operating	2016		CC	NG					Iberdrola Generación México [100%]	Iberdrola SA [100.0%]	25.5955	-100.888	exact	Ramos Arizpe			Coahuila	https://www.gem.wiki/Ramos_cogeneration_power_station	L100000406244	G100000406525	ES0144580Y14	1	52	52	8	2056	2096	2136	52	52	52	52	52	52	52	52	52	52	52	0
oil/gas	Spain	Europe	Southern Europe	Santurce power station	4			396	operating	2005		CC	NG					Iberdrola SA [100.0%]	Iberdrola SA [100.0%]	43.34	-3.0539	exact	Santurtzi			Biscay	https://www.gem.wiki/Santurce_power_station	L100000400713	G100000400713	ES0144580Y14	1	396	396	19	2045	2085	2125	396	396	396	396	396	396	396	396	396	0	0	0
oil/gas	Australia	Oceania	Australia and New Zealand	Smithfield Energy Facility power station	4			160	operating	1997	2044	CC	NG					Smithfield Power Generation Pty Ltd [100.0%]	Iberdrola SA [100.0%]	-33.85	150.947	exact	Smithfield			New South Wales	https://www.gem.wiki/Smithfield_Energy_Facility_power_station	L100000405132	G100000401541	ES0144580Y14	1	160	160	27	2037	2077	2117	160	160	160	160	160	160	0	0	0	0	0	0
oil/gas	Spain	Europe	Southern Europe	Tarragona power station	1			417	operating	2004		CC	NG					Tarragona Power SL [100.0%]	Iberdrola SA [100.0%]	41.1102	1.18055	exact	La Canonja			Tarragona	https://www.gem.wiki/Tarragona_power_station	L100000400718	G100000400718	ES0144580Y14	1	417	417	20	2044	2084	2124	417	417	417	417	417	417	417	417	417	0	0	0
hydropower	Portugal	Europe	Southern Europe	Alto Tâmega hydroelectric plant				160	construction	2024		conventional storage				TRUE	FALSE	Iberdrola		41.5739	-7.7311	exact		Vila Real			https://gem.wiki/Alto_Tâmega_hydroelectric_plant	L603189	G603224	ES0144580Y14	1	160	160	0	2064	2104	2144	0	0	0	0	160	160	160	160	160	160	160	160
hydropower	Spain	Europe	Southern Europe	Barazar hydroelectric plant			Barazar 1	84	operating	1957		conventional storage				TRUE	FALSE	Iberdrola		43.0796	-2.7338	exact				Autonomous Community of the Basque Country	https://gem.wiki/Barazar_hydroelectric_plant	L603346	G603381	ES0144580Y14	1	84	84	67	1997	2037	2077	84	84	84	84	84	84	84	84	84	84	84	84
hydropower	Spain	Europe	Southern Europe	Cofrentes hydroelectric plant			Salto de Cofrentes	122	operating	1951		conventional storage				TRUE	FALSE	Iberdrola		39.2468	-1.0939	exact			Valencia	Valencian Community	https://gem.wiki/Cofrentes_hydroelectric_plant	L603357	G603392	ES0144580Y14	1	122	122	73	1991	2031	2071	122	122	122	122	122	122	122	122	122	122	122	122
hydropower	Spain	Europe	Southern Europe	Conso hydroelectric plant			Las Portas	270	operating	1975		unknown				TRUE	FALSE	Iberdrola		42.1142	-7.209	exact		Viana		Galicia	https://gem.wiki/Conso_hydroelectric_plant	L603358	G603393	ES0144580Y14	1	270	270	49	2015	2055	2095	270	270	270	270	270	270	270	270	270	270	270	270
hydropower	Spain	Europe	Southern Europe	Cortes II hydroelectric plant				246	operating	1989		conventional storage				TRUE	FALSE	Iberdrola		39.2636	-0.919	exact			Valencia	Valencian Community	https://gem.wiki/Cortes_II_hydroelectric_plant	L603360	G603395	ES0144580Y14	1	246	246	35	2029	2069	2109	246	246	246	246	246	246	246	246	246	246	246	246
hydropower	Spain	Europe	Southern Europe	Cortes La Muela II hydroelectric plant			La Muela II	882	operating	2013		pumped storage				TRUE	FALSE	Iberdrola		39.2444	-0.9314	exact			Valencia	Valencian Community	https://gem.wiki/Cortes_La_Muela_II_hydroelectric_plant	L603361	G603396	ES0144580Y14	1	882	882	11	2053	2093	2133	882	882	882	882	882	882	882	882	882	882	882	882
hydropower	Portugal	Europe	Southern Europe	Daivões hydroelectric plant				118	operating	2022		conventional storage				TRUE	FALSE	Iberdrola		41.5239	-7.8651	exact		Braga			https://gem.wiki/Daivões_hydroelectric_plant	L603198	G604331	ES0144580Y14	1	118	118	2	2062	2102	2142	0	0	118	118	118	118	118	118	118	118	118	118
hydropower	Portugal	Europe	Southern Europe	Gouvães hydroelectric plant				220	operating	2022		pumped storage				TRUE	FALSE	Iberdrola		41.4938	-7.727	exact		Vila Real			https://gem.wiki/Gouvães_hydroelectric_plant	L603201	G603236	ES0144580Y14	1	220	220	2	2062	2102	2142	0	0	220	220	220	220	220	220	220	220	220	220
hydropower	Spain	Europe	Southern Europe	José María Oriol hydroelectric plant			Alcántara II, Jose M Oriol Grupo 4	957	operating	1969		conventional storage				TRUE	FALSE	Iberdrola		39.7291	-6.8854	exact		Tajo-Salor	Cáceres	Extremadura	https://gem.wiki/José_María_Oriol_hydroelectric_plant	L603369	G603404	ES0144580Y14	1	957	957	55	2009	2049	2089	957	957	957	957	957	957	957	957	957	957	957	957
hydropower	Spain	Europe	Southern Europe	La Muela I hydroelectric plant			La Muela	635	operating	1989		pumped storage				TRUE	FALSE	Iberdrola		39.2628	-0.9192	exact			Valencia	Valencian Community	https://gem.wiki/La_Muela_I_hydroelectric_plant	L603370	G603405	ES0144580Y14	1	635	635	35	2029	2069	2109	635	635	635	635	635	635	635	635	635	635	635	635
hydropower	Spain	Europe	Southern Europe	Puente Bibey hydroelectric plant			Puente Bibey 4	315	operating	1960		unknown				TRUE	FALSE	Iberdrola		42.3342	-7.2152	exact		Terra de Trives		Galicia	https://gem.wiki/Puente_Bibey_hydroelectric_plant	L603380	G603415	ES0144580Y14	1	315	315	64	2000	2040	2080	315	315	315	315	315	315	315	315	315	315	315	315
hydropower	Spain	Europe	Southern Europe	Ricobayo I hydroelectric plant			Ricobayo (Esla)	175	operating	1934		conventional storage				TRUE	FALSE	Iberdrola		41.5284	-5.9867	exact			Zamora	Castile and León	https://gem.wiki/Ricobayo_I_hydroelectric_plant	L603382	G603417	ES0144580Y14	1	175	175	90	1974	2014	2054	175	175	175	175	175	175	175	175	175	175	175	175
hydropower	Spain	Europe	Southern Europe	Ricobayo II hydroelectric plant				154	operating	1998		conventional storage				TRUE	FALSE	Iberdrola		41.5284	-5.9867	exact			Zamora	Castile and León	https://gem.wiki/Ricobayo_II_hydroelectric_plant	L603383	G603418	ES0144580Y14	1	154	154	26	2038	2078	2118	154	154	154	154	154	154	154	154	154	154	154	154
hydropower	Spain	Europe	Southern Europe	San Esteban hydroelectric plant			Santo Estavo I	263	operating	1957		conventional storage				TRUE	FALSE	Iberdrola		42.4143	-7.6534	exact	Nogueira de Ramuín	Ourense		Galicia	https://gem.wiki/San_Esteban_hydroelectric_plant	L603385	G603420	ES0144580Y14	1	263	263	67	1997	2037	2077	263	263	263	263	263	263	263	263	263	263	263	263
hydropower	Spain	Europe	Southern Europe	San Esteban II hydroelectric plant			Santo Estavo II, San Esteban II Grupo 1	188	operating	2012		conventional storage				TRUE	FALSE	Iberdrola		42.4143	-7.6534	exact	Nogueira de Ramuín	Ourense		Galicia	https://gem.wiki/San_Esteban_II_hydroelectric_plant	L603386	G603421	ES0144580Y14	1	188	188	12	2052	2092	2132	188	188	188	188	188	188	188	188	188	188	188	188
hydropower	Spain	Europe	Southern Europe	Saucelle hydroelectric plant				251	operating	1956		conventional storage				TRUE	FALSE	Iberdrola		41.0449	-6.8071	exact			Salamanca	Castile and León	https://gem.wiki/Saucelle_hydroelectric_plant	L604105	G604144	ES0144580Y14	1	251	251	68	1996	2036	2076	251	251	251	251	251	251	251	251	251	251	251	251
hydropower	Spain	Europe	Southern Europe	Saucelle II hydroelectric plant				269	operating	1985		conventional storage				TRUE	FALSE	Iberdrola		41.0449	-6.8071	exact			Salamanca	Castile and León	https://gem.wiki/Saucelle_II_hydroelectric_plant	L604106	G604145	ES0144580Y14	1	269	269	39	2025	2065	2105	269	269	269	269	269	269	269	269	269	269	269	269
hydropower	Spain	Europe	Southern Europe	Soutelo hydroelectric plant			Soutelo 2	215	operating			pumped storage				TRUE	FALSE	Iberdrola		42.1543	-7.1887	exact		Viana		Galicia	https://gem.wiki/Soutelo_hydroelectric_plant	L603388	G603423	ES0144580Y14	1	215	215	-99	40	80	120	215	215	215	215	215	215	215	215	215	215	215	215
hydropower	Spain	Europe	Southern Europe	Torrejón hydroelectric plant			Torrejon 1	132	operating			pumped storage				TRUE	FALSE	Iberdrola		39.8356	-5.989	exact		Campo Arañuelo	Cáceres	Extremadura	https://gem.wiki/Torrejón_hydroelectric_plant	L603394	G603429	ES0144580Y14	1	132	132	-99	40	80	120	132	132	132	132	132	132	132	132	132	132	132	132
hydropower	Spain	Europe	Southern Europe	Valdecañas hydroelectric plant			Valdecanas 3	249	operating	1964		pumped storage				TRUE	FALSE	Iberdrola		39.7785	-5.612	exact		Campo Arañuelo	Cáceres	Extremadura	https://gem.wiki/Valdecañas_hydroelectric_plant	L603395	G603430	ES0144580Y14	1	249	249	60	2004	2044	2084	249	249	249	249	249	249	249	249	249	249	249	249
hydropower	Spain	Europe	Southern Europe	Villacampo hydroelectric plant				218	operating	1949		conventional storage				TRUE	FALSE	Iberdrola		41.4911	-6.0853	exact			Zamora	Castile and León	https://gem.wiki/Villacampo_hydroelectric_plant	L603398	G603433	ES0144580Y14	1	218	218	75	1989	2029	2069	218	218	218	218	218	218	218	218	218	218	218	218
hydropower	Spain	Europe	Southern Europe	Villarino hydroelectric plant			Villarino 4	810	operating	1970		pumped storage				TRUE	FALSE	Iberdrola		41.255	-6.4874	exact			Salamanca	Castile and León	https://gem.wiki/Villarino_hydroelectric_plant	L603399	G603434	ES0144580Y14	1	810	810	54	2010	2050	2090	810	810	810	810	810	810	810	810	810	810	810	810
nuclear	Spain	Europe	Southern Europe	Almaraz nuclear power plant	1			1049	operating	1983		pressurized water reactor						Iberdrola; Endesa; Gas Natural		39.807	-5.6986	exact		Campo Arañuelo	Cáceres	Extremadura	https://gem.wiki/Almaraz_nuclear_power_plant	L500113	G500239	ES0144580Y14	0.333333	2093		41	2023	2063	2103	349.667	349.667	349.667	349.667	349.667	349.667	349.667	349.667	349.667	349.667	349.667	349.667
nuclear	Spain	Europe	Southern Europe	Almaraz nuclear power plant	2			1044	operating	1984		pressurized water reactor						Iberdrola; Endesa; Gas Natural		39.807	-5.6986	exact		Campo Arañuelo	Cáceres	Extremadura	https://gem.wiki/Almaraz_nuclear_power_plant	L500113	G500240	ES0144580Y14	0.333333	2093	2093	40	2024	2064	2104	348	348	348	348	348	348	348	348	348	348	348	348
nuclear	Spain	Europe	Southern Europe	Ascó nuclear power plant	2			1027	operating	1986		pressurized water reactor						Endesa; Iberdrola		41.1993	0.5694	exact		Ribera d'Ebre	Tarragona	Catalonia	https://gem.wiki/Ascó_nuclear_power_plant	L500115	G500243	ES0144580Y14	0.5	1027	1027	38	2026	2066	2106	513.5	513.5	513.5	513.5	513.5	513.5	513.5	513.5	513.5	513.5	513.5	513.5
nuclear	Spain	Europe	Southern Europe	Cofrentes nuclear power plant				1102	operating	1985		boiling water reactor						Iberdrola SA		39.2134	-1.0509	exact			Valencia	Valencian Community	https://gem.wiki/Cofrentes_nuclear_power_plant	L500081	G500149	ES0144580Y14	1	1102	1102	39	2025	2065	2105	1102	1102	1102	1102	1102	1102	1102	1102	1102	1102	1102	1102
nuclear	Spain	Europe	Southern Europe	Trillo nuclear power plant	1			1066	operating	1988		pressurized water reactor						Iberdrola; Gas Natural; Hidroeléctrica del Cantábrico; Nuclenor		40.7016	-2.6227	exact			Guadalajara	Castile-La Mancha	https://gem.wiki/Trillo_nuclear_power_plant	L500105	G500202	ES0144580Y14	0.25	1066	1066	36	2028	2068	2108	266.5	266.5	266.5	266.5	266.5	266.5	266.5	266.5	266.5	266.5	266.5	266.5
nuclear	Spain	Europe	Southern Europe	Vandellos nuclear power plant	2			1087	operating	1988		pressurized water reactor						Endesa; Iberdrola		40.9511	0.8662	exact	Vandellòs i l'Hospitalet de l'Infant	Baix Camp	Tarragona	Catalonia	https://gem.wiki/Vandellos_nuclear_power_plant	L500114	G500241	ES0144580Y14	0.5	1087	#REF!	36	2028	2068	2108	543.5	543.5	543.5	543.5	543.5	543.5	543.5	543.5	543.5	543.5	543.5	543.5
solar	Spain	Europe	Southern Europe	Alcarria solar farm				40	construction			PV						Iberdrola SA		39.6196	-2.7904	approximate			Cuenca	Castile-La Mancha	https://gem.wiki/Alcarria_solar_farm	L824304	G827413	ES0144580Y14	1	40	40	-99	40	80	120	0	0	0	0	0	0	0	40	40	40	40	40
solar	Portugal	Europe	Southern Europe	Alcochete solar farm	1			32.9	pre-construction			PV						Iberdrola SA		38.7056	-8.8517	approximate		Setúbal			https://gem.wiki/Alcochete_solar_farm	L824084	G827155	ES0144580Y14	1	45.6		-99	40	80	120	0	0	0	0	0	0	0	0	0	32.9	32.9	32.9
solar	Portugal	Europe	Southern Europe	Alcochete solar farm	2			12.7	pre-construction			PV						Iberdrola SA		38.7056	-8.8517	approximate		Setúbal			https://gem.wiki/Alcochete_solar_farm	L824084	G827156	ES0144580Y14	1	45.6	45.6	-99	40	80	120	0	0	0	0	0	0	0	0	0	12.7	12.7	12.7
solar	Portugal	Europe	Southern Europe	Algeruz solar farm	2			27.4	operating	2022		PV						Iberdrola SA		38.5792	-8.8435	approximate		Setúbal			https://gem.wiki/Algeruz_solar_farm	L824087	G827160	ES0144580Y14	1	27.4	27.4	2	2062	2102	2142	0	0	27.4	27.4	27.4	27.4	27.4	27.4	27.4	27.4	27.4	27.4
solar	Spain	Europe	Southern Europe	Almaraz solar farm	1			42.6	operating	2022		PV						Iberdrola SA		39.7867	-5.7003	approximate		Campo Arañuelo	Cáceres	Extremadura	https://gem.wiki/Almaraz_solar_farm	L824320	G827431	ES0144580Y14	1	85.2		2	2062	2102	2142	0	0	42.6	42.6	42.6	42.6	42.6	42.6	42.6	42.6	42.6	42.6
solar	Spain	Europe	Southern Europe	Almaraz solar farm	2			42.6	operating	2022		PV						Iberdrola SA		39.7867	-5.7003	approximate		Campo Arañuelo	Cáceres	Extremadura	https://gem.wiki/Almaraz_solar_farm	L824320	G827432	ES0144580Y14	1	85.2	85.2	2	2062	2102	2142	0	0	42.6	42.6	42.6	42.6	42.6	42.6	42.6	42.6	42.6	42.6
solar	Spain	Europe	Southern Europe	Andévalo solar farm	1			50	operating	2020		PV						Iberdrola SA		37.6102	-7.2453	approximate	Puebla de Guzmán	Andévalo		Huelva	https://gem.wiki/Andévalo_solar_farm	L805876	G806761	ES0144580Y14	1	50	50	4	2060	2100	2140	50	50	50	50	50	50	50	50	50	50	50	50
solar	Spain	Europe	Southern Europe	Arenales (Iberdrola) solar farm	1			150	operating	2021		PV						Iberdrola SA		39.4578	-6.4421	approximate	Caceres			Caceres	https://gem.wiki/Arenales_(Iberdrola)_solar_farm	L805877	G806762	ES0144580Y14	1	150	150	3	2061	2101	2141	0	150	150	150	150	150	150	150	150	150	150	150
solar	Australia	Oceania	Australia and New Zealand	Avonlie Solar				245	construction	2023		PV						Iberdrola SA		-34.9183	146.609	exact				New South Wales	https://gem.wiki/Avonlie_Solar	L805593	G806435	ES0144580Y14	1	245	245	1	2063	2103	2143	0	0	0	245	245	245	245	245	245	245	245	245
solar	Spain	Europe	Southern Europe	Ayamonte Hybrid solar farm				57.6	announced			PV						Iberdrola SA		37.2148	-7.4001	approximate		Ayamonte			https://gem.wiki/Ayamonte_Hybrid_solar_farm	L824369	G827486	ES0144580Y14	1	57.6	57.6	-99	40	80	120	0	0	0	0	0	0	0	0	0	57.6	57.6	57.6
solar	Spain	Europe	Southern Europe	Azaila solar farm	1			50	operating	2021		PV						Iberdrola SA		41.2641	-0.452	exact	Azaila			Teruel	https://gem.wiki/Azaila_solar_farm	L805863	G806745	ES0144580Y14	1	50		3	2061	2101	2141	0	50	50	50	50	50	50	50	50	50	50	50
solar	Spain	Europe	Southern Europe	Barcience solar farm	1			50	operating	2021		PV						Iberdrola SA		39.938	-4.0315	approximate	Bargas			Toledo	https://gem.wiki/Barcience_solar_farm	L805878	G806763	ES0144580Y14	1	50	50	3	2061	2101	2141	0	50	50	50	50	50	50	50	50	50	50	50
solar	Spain	Europe	Southern Europe	Biar solar farm				45.5	pre-construction			PV						Iberdrola SA		38.3516	-0.49	approximate	Alicante		Alacant / Alicante	Valencian Community	https://gem.wiki/Biar_solar_farm	L824385	G827509	ES0144580Y14	1	45.5	45.5	-99	40	80	120	0	0	0	0	0	0	0	0	0	45.5	45.5	45.5
solar	Australia	Oceania	Australia and New Zealand	Broadsound solar farm				385	pre-construction			PV						Iberdrola SA		-22.8114	149.389	exact				Queensland	https://gem.wiki/Broadsound_solar_farm	L805588	G806430	ES0144580Y14	1	385	385	-99	40	80	120	0	0	0	0	0	0	0	0	0	385	385	385
solar	Spain	Europe	Southern Europe	Campo Arañuelo solar farm	1		Arañuelo I	50	operating	2021		PV						Iberdrola SA		39.8161	-5.6831	approximate	Almaraz			Cáceres	https://gem.wiki/Campo_Arañuelo_solar_farm	L805864	G806746	ES0144580Y14	1	140		3	2061	2101	2141	0	50	50	50	50	50	50	50	50	50	50	50
solar	Spain	Europe	Southern Europe	Campo Arañuelo solar farm	2		Arañuelo II	50	operating	2021		PV						Iberdrola SA		39.8161	-5.6831	approximate	Almaraz			Cáceres	https://gem.wiki/Campo_Arañuelo_solar_farm	L805864	G806747	ES0144580Y14	1	140		3	2061	2101	2141	0	50	50	50	50	50	50	50	50	50	50	50
solar	Spain	Europe	Southern Europe	Campo Arañuelo solar farm	3		Arañuelo III	40	operating	2021		PV						Iberdrola SA		39.7865	-5.7008	exact	Romangordo			Cáceres	https://gem.wiki/Campo_Arañuelo_solar_farm	L805864	G806749	ES0144580Y14	1	140	140	3	2061	2101	2141	0	40	40	40	40	40	40	40	40	40	40	40
solar	Portugal	Europe	Southern Europe	Carregado solar farm				64	construction			PV						Iberdrola SA		39.0237	-8.9646	approximate		Lisbon			https://gem.wiki/Carregado_solar_farm	L824113	G827190	ES0144580Y14	1	64	64	-99	40	80	120	0	0	0	0	0	0	0	64	64	64	64	64
solar	Spain	Europe	Southern Europe	Cartagena solar farm	1		SABIC Cartagena	100	announced			PV						Iberdrola SA		37.7063	-1.1009	exact	Cartagena	Campo de Cartagena y Mar Menor	Region of Murcia	Region of Murcia	https://gem.wiki/Cartagena_solar_farm	L805874	G806759	ES0144580Y14	1	100	100	-99	40	80	120	0	0	0	0	0	0	0	0	0	100	100	100
solar	Spain	Europe	Southern Europe	Ceclavín solar farm	1			328	operating	2021		PV						Iberdrola SA		39.8201	-6.7798	approximate	Ceclavín			Cáceres	https://gem.wiki/Ceclavín_solar_farm	L805865	G806748	ES0144580Y14	1	328	328	3	2061	2101	2141	0	328	328	328	328	328	328	328	328	328	328	328
solar	Spain	Europe	Southern Europe	Cedillo solar farm				374.9	pre-construction			PV						Iberdrola SA		39.6509	-7.4983	approximate		Valencia de Alcántara	Cáceres	Extremadura	https://gem.wiki/Cedillo_solar_farm	L824445	G827588	ES0144580Y14	1	374.9	374.9	-99	40	80	120	0	0	0	0	0	0	0	0	0	374.9	374.9	374.9
solar	Spain	Europe	Southern Europe	Cespedera solar farm				27	pre-construction			PV						Iberdrola SA		36.52	-6.2808	approximate	Cadiz				https://gem.wiki/Cespedera_solar_farm	L824454	G827599	ES0144580Y14	1	27	27	-99	40	80	120	0	0	0	0	0	0	0	0	0	27	27	27
solar	Spain	Europe	Southern Europe	Ciudad Rodrigo solar farm	1		Ciudad Rodrigo PV	318	construction			PV						Iberdrola SA		40.603	-6.5214	approximate	Ciudad Rodrigo			Salamanca	https://gem.wiki/Ciudad_Rodrigo_solar_farm	L805866	G806750	ES0144580Y14	1	318	318	-99	40	80	120	0	0	0	0	0	0	0	318	318	318	318	318
solar	Portugal	Europe	Southern Europe	Conde solar farm				14	pre-construction			PV						Iberdrola SA		39.678	-8.1983	approximate		Castelo Branco			https://gem.wiki/Conde_solar_farm	L824126	G827204	ES0144580Y14	1	14	14	-99	40	80	120	0	0	0	0	0	0	0	0	0	14	14	14
solar	Mexico	Americas	Latin America and the Caribbean	Cuyoaco solar farm		Planta Solar Cuyoaco		220.8	operating	2020		PV						Iberdrola México		19.5848	-97.5922	exact		Cuyoaco		Puebla	https://gem.wiki/Cuyoaco_solar_farm	L807277	G808631	ES0144580Y14	1	220.8	220.8	4	2060	2100	2140	220.8	220.8	220.8	220.8	220.8	220.8	220.8	220.8	220.8	220.8	220.8	220.8
solar	Spain	Europe	Southern Europe	El Almendro solar farm				33.3	announced			PV						Iberdrola SA		37.506	-7.2717	approximate		El Andévalo	Huelva	Andalusia	https://gem.wiki/El_Almendro_solar_farm	L824499	G827655	ES0144580Y14	1	33.3	33.3	-99	40	80	120	0	0	0	0	0	0	0	0	0	33.3	33.3	33.3
solar	Spain	Europe	Southern Europe	El Romeral solar farm	1			42	operating	2022		PV						Iberdrola SA		39.5687	-2.0884	approximate	Alarcón			Cuenca	https://gem.wiki/El_Romeral_solar_farm	L805871	G806755	ES0144580Y14	1	42	42	2	2062	2102	2142	0	0	42	42	42	42	42	42	42	42	42	42
solar	Portugal	Europe	Southern Europe	Estoi solar farm				83	pre-construction	2024		PV						Iberdrola SA		37.0948	-7.8896	approximate	Faro	Faro			https://gem.wiki/Estoi_solar_farm	L824136	G827214	ES0144580Y14	1	83	83	0	2064	2104	2144	0	0	0	0	83	83	83	83	83	83	83	83
solar	Portugal	Europe	Southern Europe	Fernando Pessoa solar farm				1200	pre-construction	2025		PV						Iberdrola SA; Prosolia INC		37.9851	-8.7751	approximate	Santiago do Cacém	Sines			https://gem.wiki/Fernando_Pessoa_solar_farm	L824141	G827219	ES0144580Y14	0.5	1200	1200	-1	2065	2105	2145	0	0	0	0	0	600	600	600	600	600	600	600
solar	Spain	Europe	Southern Europe	Francisco Pizarro solar farm	1			590	operating	2022		PV						Iberdrola SA		39.5731	-5.7051	approximate	Torrecillas de la Tiesa			Cáceres	https://gem.wiki/Francisco_Pizarro_solar_farm	L805867	G806751	ES0144580Y14	1	590	590	2	2062	2102	2142	0	0	590	590	590	590	590	590	590	590	590	590
solar	Spain	Europe	Southern Europe	Fuendetodos solar farm				124.9	pre-construction			PV						Iberdrola SA		41.3454	-0.9952	approximate		Campo de Belchite		Aragon	https://gem.wiki/Fuendetodos_solar_farm	L824549	G827719	ES0144580Y14	1	124.9	124.9	-99	40	80	120	0	0	0	0	0	0	0	0	0	124.9	124.9	124.9
solar	Spain	Europe	Southern Europe	Fuentes solar farm				50	construction			PV						Iberdrola SA		39.9442	-2.0069	approximate	Fuentes				https://gem.wiki/Fuentes_solar_farm	L824551	G827721	ES0144580Y14	1	50		-99	40	80	120	0	0	0	0	0	0	0	50	50	50	50	50
solar	Spain	Europe	Southern Europe	FV Alhorines solar farm	1			50	pre-construction			PV						Iberdrola SA		38.7624	-0.9537	approximate	La Encina	Vilena		Alicante	https://gem.wiki/FV_Alhorines_solar_farm	L805868	G806752	ES0144580Y14	1	50	50	-99	40	80	120	0	0	0	0	0	0	0	0	0	50	50	50
solar	Spain	Europe	Southern Europe	FV Cofrentes solar farm	1		FV Cofrentes 1	200	pre-construction			PV						Iberdrola SA		39.2238	-1.0591	approximate	Cofrentes			Valencia	https://gem.wiki/FV_Cofrentes_solar_farm	L805870	G806754	ES0144580Y14	1	200	200	-99	40	80	120	0	0	0	0	0	0	0	0	0	200	200	200
solar	Spain	Europe	Southern Europe	Guillena solar farm				144	construction			PV						Iberdrola SA		37.3803	-5.9602	approximate	Seville				https://gem.wiki/Guillena_solar_farm	L824582	G827761	ES0144580Y14	1	144	144	-99	40	80	120	0	0	0	0	0	0	0	144	144	144	144	144
solar	Mexico	Americas	Latin America and the Caribbean	Hermosillo PV Solar Park		Parque Fotovoltaico Hermosillo		100	operating	2018		PV						Iberdrola SA		28.9622	-111.503	exact		Hermosillo		Sonora	https://gem.wiki/Hermosillo_PV_Solar_Park	L807279	G808633	ES0144580Y14	1	100	100	6	2058	2098	2138	100	100	100	100	100	100	100	100	100	100	100	100
solar	Spain	Europe	Southern Europe	Ibersol Ciudad Real CSP solar farm			Puertollano Solar Thermal, Ence Termollano	50	operating	2009		Solar Thermal						Iberdrola SA [90%]; IDAE (Instituto para la Diversificación y el Ahorro de la Energía) [10%]		38.6433	-3.975	exact		Campo de Calatrava	Ciudad Real	Castile-La Mancha	https://gem.wiki/Ibersol_Ciudad_Real_CSP_solar_farm	L824610	G827804	ES0144580Y14	0.9	50	50	15	2049	2089	2129	45	45	45	45	45	45	45	45	45	45	45	45
solar	Mexico	Americas	Latin America and the Caribbean	Laborcilla solar farm		Planta Solar Laborcilla		585	construction			PV						Iberdrola		22.763	-102.582	approximate				Zacatecas	https://gem.wiki/Laborcilla_solar_farm	L832540	G838104	ES0144580Y14	1	585	585	-99	40	80	120	0	0	0	0	0	0	0	585	585	585	585	585
solar	Spain	Europe	Southern Europe	Majada Alta solar farm				50	construction	2024		PV						Iberdrola SA		39.6511	-7.4991	approximate	Cedillo			Extremadura	https://gem.wiki/Majada_Alta_solar_farm	L824704	G827905	ES0144580Y14	1	50	50	0	2064	2104	2144	0	0	0	0	50	50	50	50	50	50	50	50
solar	Spain	Europe	Southern Europe	Manantiales solar farm				30	construction			PV						Iberdrola SA		40.6341	-3.1717	approximate	Guadalajara				https://gem.wiki/Manantiales_solar_farm	L824709	G827910	ES0144580Y14	1	30	30	-99	40	80	120	0	0	0	0	0	0	0	30	30	30	30	30
solar	Portugal	Europe	Southern Europe	Montechoro solar farm	2			25	construction			PV						Iberdrola SA		37.1006	-8.2281	approximate	Albufeira	Faro			https://gem.wiki/Montechoro_solar_farm	L824175	G827266	ES0144580Y14	1	36.6		-99	40	80	120	0	0	0	0	0	0	0	25	25	25	25	25
solar	Portugal	Europe	Southern Europe	Montechoro solar farm	1			11.6	construction			PV						Iberdrola SA		37.1006	-8.2281	approximate	Albufeira	Faro			https://gem.wiki/Montechoro_solar_farm	L824175	G827265	ES0144580Y14	1	36.6	36.6	-99	40	80	120	0	0	0	0	0	0	0	11.6	11.6	11.6	11.6	11.6
solar	Spain	Europe	Southern Europe	Morón de Almazán Hybrid solar farm				49.5	pre-construction			PV						Iberdrola SA		41.3892	-2.4272	exact			Soria	Castile and León	https://gem.wiki/Morón_de_Almazán_Hybrid_solar_farm	L824743	G827951	ES0144580Y14	1	49.5	49.5	-99	40	80	120	0	0	0	0	0	0	0	0	0	49.5	49.5	49.5
solar	Spain	Europe	Southern Europe	Núñez De Balboa solar farm	1			500	operating	2020		PV						Iberdrola SA		38.4533	-6.226	exact		Tierra de Barros	Badajoz	Extremadura	https://gem.wiki/Núñez_De_Balboa_solar_farm	L805862	G806744	ES0144580Y14	1	500	500	4	2060	2100	2140	500	500	500	500	500	500	500	500	500	500	500	500
solar	Spain	Europe	Southern Europe	Olmedilla solar farm	1		Iberdrola Olmedilla	42	operating	2022		PV						Iberdrola SA		39.6153	-2.1077	approximate	Olmedilla de Alarcón			Cuenca	https://gem.wiki/Olmedilla_solar_farm	L805879	G806764	ES0144580Y14	1	42	42	2	2062	2102	2142	0	0	42	42	42	42	42	42	42	42	42	42
solar	Spain	Europe	Southern Europe	Oriol solar farm				273.3	pre-construction			PV						Iberdrola SA		39.8221	-6.7734	approximate	Ceclavín				https://gem.wiki/Oriol_solar_farm	L824778	G827997	ES0144580Y14	1	273.3	273.3	-99	40	80	120	0	0	0	0	0	0	0	0	0	273.3	273.3	273.3
solar	Spain	Europe	Southern Europe	Otero solar farm			Otero Segovia	505	pre-construction			PV						Iberdrola SA		40.9796	-4.3668	approximate			Segovia	Castile and León	https://gem.wiki/Otero_solar_farm	L824782	G828002	ES0144580Y14	1	505	505	-99	40	80	120	0	0	0	0	0	0	0	0	0	505	505	505
solar	Spain	Europe	Southern Europe	Peñaflor (Iberdrola) solar farm				136.5	pre-construction			PV						Iberdrola SA		41.6791	-0.6937	approximate		Zaragoza		Aragon	https://gem.wiki/Peñaflor_(Iberdrola)_solar_farm	L824793	G828015	ES0144580Y14	1	136.5	136.5	-99	40	80	120	0	0	0	0	0	0	0	0	0	136.5	136.5	136.5
solar	Spain	Europe	Southern Europe	Peñarrubia solar farm				50	construction			PV						Iberdrola SA		43.2591	-4.5842	approximate	Peñarrubia				https://gem.wiki/Peñarrubia_solar_farm	L824796	G828019	ES0144580Y14	1	50	50	-99	40	80	120	0	0	0	0	0	0	0	50	50	50	50	50
solar	Spain	Europe	Southern Europe	Peralta solar farm				370	pre-construction			PV						Iberdrola		42.3358	-1.8117	approximate		Erriberagoiena / Ribera Alta	Navarre	Navarre	https://gem.wiki/Peralta_solar_farm	L824798	G828021	ES0144580Y14	1	370	370	-99	40	80	120	0	0	0	0	0	0	0	0	0	370	370	370
solar	Australia	Oceania	Australia and New Zealand	Port Augusta Renewable Energy Park solar farm				107	operating	2021		PV						Iberdrola SA		-32.4909	137.764	approximate	Port Augusta			South Australia	https://gem.wiki/Port_Augusta_Renewable_Energy_Park_solar_farm	L805594	G806436	ES0144580Y14	1	107	107	3	2061	2101	2141	0	107	107	107	107	107	107	107	107	107	107	107
solar	Spain	Europe	Southern Europe	PSF Ayora solar farm	1		PSF Ayora 1	200	pre-construction			PV						Iberdrola SA		39.2313	-1.0535	approximate	Cofrentes			Valencia	https://gem.wiki/PSF_Ayora_solar_farm	L805869	G806753	ES0144580Y14	1	200	200	-99	40	80	120	0	0	0	0	0	0	0	0	0	200	200	200
solar	Spain	Europe	Southern Europe	Puertollano Green Hydrogen Solar Plant	1			120	operating	2022		PV						Iberdrola SA		38.6927	-4.097	approximate	Puertollano			Ciudad Real	https://gem.wiki/Puertollano_Green_Hydrogen_Solar_Plant	L805875	G806760	ES0144580Y14	1	120	120	2	2062	2102	2142	0	0	120	120	120	120	120	120	120	120	120	120
solar	Spain	Europe	Southern Europe	Radona 1 Hybrid solar farm				24	pre-construction			PV						Iberdrola SA		41.2956	-2.4713	exact			Soria	Castile and León	https://gem.wiki/Radona_1_Hybrid_solar_farm	L824824	G828051	ES0144580Y14	1	24	24	-99	40	80	120	0	0	0	0	0	0	0	0	0	24	24	24
solar	Spain	Europe	Southern Europe	Radona 2 Hybrid solar farm				31.5	pre-construction			PV						Iberdrola SA		41.2956	-2.4713	exact			Soria	Castile and León	https://gem.wiki/Radona_2_Hybrid_solar_farm	L824825	G828052	ES0144580Y14	1	31.5	31.5	-99	40	80	120	0	0	0	0	0	0	0	0	0	31.5	31.5	31.5
solar	Spain	Europe	Southern Europe	Revilla-Vallejera solar farm				50	operating	2022		PV						Iberdrola SA		42.1462	-4.1598	exact			Burgos	Castile and León	https://gem.wiki/Revilla-Vallejera_solar_farm	L824831	G828058	ES0144580Y14	1	50	50	2	2062	2102	2142	0	0	50	50	50	50	50	50	50	50	50	50
solar	Spain	Europe	Southern Europe	Rivera solar farm				419.9	pre-construction	2024		PV						Iberdrola SA		37.3835	-6.8368	approximate		El Condado	Huelva	Andalusia	https://gem.wiki/Rivera_solar_farm	L824835	G828065	ES0144580Y14	1	419.9	419.9	0	2064	2104	2144	0	0	0	0	419.9	419.9	419.9	419.9	419.9	419.9	419.9	419.9
solar	Spain	Europe	Southern Europe	San Antonio (Iberdrola) solar farm				50	construction			PV						Iberdrola SA		39.6511	-7.4991	approximate	Cedillo				https://gem.wiki/San_Antonio_(Iberdrola)_solar_farm	L824848	G828086	ES0144580Y14	1	50	50	-99	40	80	120	0	0	0	0	0	0	0	50	50	50	50	50
solar	Mexico	Americas	Latin America and the Caribbean	Santiago Arriaga PV Solar Park		Parque Solar Fotovoltaico Santiago Arriaga	Parque Fotovoltaico San Luis Potosí	200	operating	2018		PV						Iberdrola SA		21.886	-101.23	exact			Villa de Arriaga	San Luis Potosí	https://gem.wiki/Santiago_Arriaga_PV_Solar_Park	L807280	G808634	ES0144580Y14	1	200	200	6	2058	2098	2138	200	200	200	200	200	200	200	200	200	200	200	200
solar	Portugal	Europe	Southern Europe	Santiago Do Cacem solar farm	1			285	pre-construction	2025		PV						Iberdrola SA [50%]; Prosolia INC [50%]		38.7155	-9.1234	approximate	Satiago do Caem			Lisbon	https://gem.wiki/Santiago_Do_Cacem_solar_farm	L806469	G807420	ES0144580Y14	0.5	1140		-1	2065	2105	2145	0	0	0	0	0	142.5	142.5	142.5	142.5	142.5	142.5	142.5
solar	Portugal	Europe	Southern Europe	Santiago Do Cacem solar farm	2			285	pre-construction	2025		PV						Iberdrola SA [50%]; Prosolia INC [50%]		38.7155	-9.1234	approximate	Satiago do Caem			Lisbon	https://gem.wiki/Santiago_Do_Cacem_solar_farm	L806469	G807421	ES0144580Y14	0.5	1140		-1	2065	2105	2145	0	0	0	0	0	142.5	142.5	142.5	142.5	142.5	142.5	142.5
solar	Portugal	Europe	Southern Europe	Santiago Do Cacem solar farm	3			285	pre-construction	2025		PV						Iberdrola SA [50%]; Prosolia INC [50%]		38.7155	-9.1234	approximate	Satiago do Caem			Lisbon	https://gem.wiki/Santiago_Do_Cacem_solar_farm	L806469	G807422	ES0144580Y14	0.5	1140		-1	2065	2105	2145	0	0	0	0	0	142.5	142.5	142.5	142.5	142.5	142.5	142.5
solar	Portugal	Europe	Southern Europe	Santiago Do Cacem solar farm	4			285	pre-construction	2025		PV						Iberdrola SA [50%]; Prosolia INC [50%]		38.7155	-9.1234	approximate	Satiago do Caem			Lisbon	https://gem.wiki/Santiago_Do_Cacem_solar_farm	L806469	G807423	ES0144580Y14	0.5	1140	1140	-1	2065	2105	2145	0	0	0	0	0	142.5	142.5	142.5	142.5	142.5	142.5	142.5
solar	Spain	Europe	Southern Europe	Tagus solar farm	1		Tagus Complex	95	construction	2023		PV						Iberdrola SA		39.6511	-7.4991	approximate	Cedillo				https://gem.wiki/Tagus_solar_farm	L824884	G828131	ES0144580Y14	1	380		1	2063	2103	2143	0	0	0	95	95	95	95	95	95	95	95	95
solar	Spain	Europe	Southern Europe	Tagus solar farm	2		Tagus Complex	95	construction	2023		PV						Iberdrola SA		39.6511	-7.4991	approximate	Cedillo				https://gem.wiki/Tagus_solar_farm	L824884	G828132	ES0144580Y14	1	380		1	2063	2103	2143	0	0	0	95	95	95	95	95	95	95	95	95
solar	Spain	Europe	Southern Europe	Tagus solar farm	3		Tagus Complex	95	construction	2023		PV						Iberdrola SA		39.6511	-7.4991	approximate	Cedillo				https://gem.wiki/Tagus_solar_farm	L824884	G828133	ES0144580Y14	1	380		1	2063	2103	2143	0	0	0	95	95	95	95	95	95	95	95	95
solar	Spain	Europe	Southern Europe	Tagus solar farm	4		Tagus Complex	95	construction	2023		PV						Iberdrola SA		39.6511	-7.4991	approximate	Cedillo				https://gem.wiki/Tagus_solar_farm	L824884	G828134	ES0144580Y14	1	380	380	1	2063	2103	2143	0	0	0	95	95	95	95	95	95	95	95	95
solar	Spain	Europe	Southern Europe	Valbuena solar farm				50	construction			PV						Iberdrola SA		40.6341	-3.1717	approximate	Guadalajara				https://gem.wiki/Valbuena_solar_farm	L824922	G828181	ES0144580Y14	1	50	50	-99	40	80	120	0	0	0	0	0	0	0	50	50	50	50	50
solar	Spain	Europe	Southern Europe	Vara del Rey solar farm				49.5	announced			PV						Iberdrola SA		39.4219	-2.2993	approximate			Cuenca	Castile-La Mancha	https://gem.wiki/Vara_del_Rey_solar_farm	L824939	G828200	ES0144580Y14	1	49.5	49.5	-99	40	80	120	0	0	0	0	0	0	0	0	0	49.5	49.5	49.5
solar	Spain	Europe	Southern Europe	Velilla PV solar farm	1		Velilla Solar	400	construction	2023		PV						Iberdrola SA		42.8181	-4.8536	exact	Velilla del Río Carrión		Palencia	Castile and León	https://gem.wiki/Velilla_PV_solar_farm	L805872	G806756	ES0144580Y14	1	400	400	1	2063	2103	2143	0	0	0	400	400	400	400	400	400	400	400	400
solar	Spain	Europe	Southern Europe	Villalba de Guardo (Iberdrola) solar farm			Iberdrola Palencia	350	construction			PV						Iberdrola SA		42.7216	-4.8233	approximate			Palencia	Castile and León	https://gem.wiki/Villalba_de_Guardo_(Iberdrola)_solar_farm	L824943	G828204	ES0144580Y14	1	350	350	-99	40	80	120	0	0	0	0	0	0	0	350	350	350	350	350
solar	Spain	Europe	Southern Europe	Villarino solar farm	1			191	construction			PV						Iberdrola SA		41.2732	-6.4623	approximate	Villarino de los Aires			Salamanca	https://gem.wiki/Villarino_solar_farm	L805873	G806757	ES0144580Y14	1	241		-99	40	80	120	0	0	0	0	0	0	0	191	191	191	191	191
solar	Spain	Europe	Southern Europe	Villarino solar farm	2			50	construction			PV						Iberdrola SA		41.2732	-6.4623	approximate	Villarino de los Aires			Salamanca	https://gem.wiki/Villarino_solar_farm	L805873	G806758	ES0144580Y14	1	241	241	-99	40	80	120	0	0	0	0	0	0	0	50	50	50	50	50
solar	Spain	Europe	Southern Europe	Virgen de Aremos 3 solar farm				50	construction			PV						Iberdrola SA		42.0049	-4.5261	approximate	Palencia				https://gem.wiki/Virgen_de_Aremos_3_solar_farm	L824952	G828218	ES0144580Y14	1	50		-99	40	80	120	0	0	0	0	0	0	0	50	50	50	50	50
solar	Spain	Europe	Southern Europe	Virgen de Areños solar farm				50	construction			PV						Iberdrola SA		41.9826	-4.7806	approximate			Palencia	Castile and León	https://gem.wiki/Virgen_de_Areños_solar_farm	L824953	G828219	ES0144580Y14	1	50	50	-99	40	80	120	0	0	0	0	0	0	0	50	50	50	50	50
wind	Cyprus	Asia	Western Asia	Agia Anna wind farm				20	operating	2011		onshore						Iberdrola SA		34.9724	33.4997	exact					https://gem.wiki/Agia_Anna_wind_farm	L911470	G914450	ES0144580Y14	1	20	20	13	2051	2091	2131	20	20	20	20	20	20	20	20	20	20	20	20
wind	Spain	Europe	Southern Europe	Alcarama wind farm	2		Valdemadera	45	operating	2003		onshore						Iberdrola Renovables Energia SA		42.0036	-2.0462	exact	Cervera del Río Alhama			Rioja	https://gem.wiki/Alcarama_wind_farm	L914508	G917970	ES0144580Y14	1	45	45	21	2043	2083	2123	45	45	45	45	45	45	45	45	45	45	45	45
wind	Spain	Europe	Southern Europe	Alcocero De Mola wind farm				104	shelved			onshore						Iberdrola Renovables Energia SA		42.4726	-3.3582	approximate	Alcocero de Mola		Burgos	Castilla y León	https://gem.wiki/Alcocero_De_Mola_wind_farm	L915727	G919437	ES0144580Y14	1	104	104	-99	40	80	120	0	0	0	0	0	0	0	0	0	0	0	0
wind	Spain	Europe	Southern Europe	Almendros wind farm	1			20	operating	2007		onshore						Iberdrola Renovables Energia SA		38.6577	-1.435	exact	Jumilla	Altiplano	Region of Murcia	Region of Murcia	https://gem.wiki/Almendros_wind_farm	L911471	G914451	ES0144580Y14	1	48		17	2047	2087	2127	20	20	20	20	20	20	20	20	20	20	20	20
wind	Spain	Europe	Southern Europe	Almendros wind farm	2			28	operating	2007		onshore						Iberdrola Renovables Energia SA		38.664	-1.4279	exact	Jumilla	Altiplano	Region of Murcia	Region of Murcia	https://gem.wiki/Almendros_wind_farm	L911471	G916193	ES0144580Y14	1	48	48	17	2047	2087	2127	28	28	28	28	28	28	28	28	28	28	28	28
wind	Spain	Europe	Southern Europe	Altamira wind farm (Spain)				49	operating	2009		onshore						Iberdrola Renovables Energia SA		37.029	-5.0101	exact		Guadalteba	Malaga	Andalusia	https://gem.wiki/Altamira_wind_farm_(Spain)	L914774	G918277	ES0144580Y14	1	49	49	15	2049	2089	2129	49	49	49	49	49	49	49	49	49	49	49	49
wind	Spain	Europe	Southern Europe	Alto De La Degollada wind farm				50	operating	2010		onshore						Iberdrola Renovables Energia SA		42.2883	-4.1388	approximate	Castrojeriz		Burgos	Castilla y León	https://gem.wiki/Alto_De_La_Degollada_wind_farm	L914837	G918369	ES0144580Y14	1	50	50	14	2050	2090	2130	50	50	50	50	50	50	50	50	50	50	50	50
wind	Portugal	Europe	Southern Europe	Alto Do Monção wind farm			Parque Eólico Alto do Monção	32	operating	2007		onshore						Iberdrola Renovables Energia SA		40.5033	-8.2657	exact		Viseu			https://gem.wiki/Alto_Do_Monção_wind_farm	L913482	G916765	ES0144580Y14	1	32	32	17	2047	2087	2127	32	32	32	32	32	32	32	32	32	32	32	32
wind	Spain	Europe	Southern Europe	Ameixeiras-Testeiros wind farm				50	operating	2002		onshore						Iberdrola Renovables Energia SA		42.5504	-8.2063	exact		O Deza		Galicia	https://gem.wiki/Ameixeiras-Testeiros_wind_farm	L914840	G918372	ES0144580Y14	1	50	50	22	2042	2082	2122	50	50	50	50	50	50	50	50	50	50	50	50
wind	Hungary	Europe	Eastern Europe	Amundsen wind farm				26	operating	2011		onshore						Iberdrola Renovables Energia SA		47.1982	16.8685	exact	Ikervár	Vas			https://gem.wiki/Amundsen_wind_farm	L912751	G915901	ES0144580Y14	1	26	26	13	2051	2091	2131	26	26	26	26	26	26	26	26	26	26	26	26
wind	Philippines	Asia	South-eastern Asia	Aparri Bay wind farm			Aparri Bay (Offshore) Wind Power Project, Windkraft Aparri Bay	700	pre-construction			offshore mount unknown						Triconti ECC Renewables CORP (TRICONTI); Iberdrola SA		18.4914	121.7	approximate				Cagayan Province	https://gem.wiki/Aparri_Bay_wind_farm	L901297	G927453	ES0144580Y14	0.5	700	700	-99	40	80	120	0	0	0	0	0	0	0	0	0	350	350	350
wind	Spain	Europe	Southern Europe	Argañoso wind farm				22	operating	2007		onshore						Iberdrola Renovables Energia SA		42.5341	-6.2886	exact			León	Castile and León	https://gem.wiki/Argañoso_wind_farm	L912018	G915070	ES0144580Y14	1	22	22	17	2047	2087	2127	22	22	22	22	22	22	22	22	22	22	22	22
wind	Brazil	Americas	Latin America and the Caribbean	Arizona 1 wind farm	1	Parque Eólico Arizona	Parque Eólico Arizona 1	28	operating	2013		onshore						Iberdrola Neoenergia		-5.3042	-35.382	exact	Rio do Fogo		Região Geográfica Intermediária de Natal	Rio Grande do Norte	https://gem.wiki/Arizona_1_wind_farm	L905333	G907063	ES0144580Y14	1	28	28	11	2053	2093	2133	28	28	28	28	28	28	28	28	28	28	28	28
wind	Spain	Europe	Southern Europe	Atalaya De La Solana wind farm				20	operating	2003		onshore						Iberdrola Renovables Energia SA		38.7598	-2.0552	exact			Albacete	Castile-La Mancha	https://gem.wiki/Atalaya_De_La_Solana_wind_farm	L911480	G914460	ES0144580Y14	1	20	20	21	2043	2083	2123	20	20	20	20	20	20	20	20	20	20	20	20
wind	Spain	Europe	Southern Europe	Ausejo-Ocón wind farm				50	pre-construction			onshore						Iberdrola Renovables La Rioja SA		42.2986	-2.2453	approximate	Ocón			La Rioja	https://gem.wiki/Ausejo-Ocón_wind_farm	L914851	G918387	ES0144580Y14	1	50	50	-99	40	80	120	0	0	0	0	0	0	0	0	0	50	50	50
wind	Spain	Europe	Southern Europe	Azáceta wind farm				40	construction	2024		onshore						Aixendar; Iberdrola SA		42.7851	-2.5438	approximate					https://gem.wiki/Azáceta_wind_farm	L920735	G925548	ES0144580Y14	0.5	40	40	0	2064	2104	2144	0	0	0	0	20	20	20	20	20	20	20	20
wind	Spain	Europe	Southern Europe	Badaia wind farm			Badaya	50	operating	2005		onshore						Iberdrola Renovables Energia SA		42.8502	-2.8551	exact		Gasteizko kuadrilla/Cuadrilla de Vitoria		Autonomous Community of the Basque Country	https://gem.wiki/Badaia_wind_farm	L914853	G918389	ES0144580Y14	1	50	50	19	2045	2085	2125	50	50	50	50	50	50	50	50	50	50	50	50
wind	Spain	Europe	Southern Europe	Ballestas wind farm			Ballestas-Casetona, Baca, Ballestas Et Casetona	42	operating	2019		onshore						Iberdrola Renovables Energia SA		42.2017	-4.1631	exact			Burgos	Castile and León	https://gem.wiki/Ballestas_wind_farm	L914329	G917760	ES0144580Y14	1	42	42	5	2059	2099	2139	42	42	42	42	42	42	42	42	42	42	42	42
wind	Germany	Europe	Western Europe	Baltic Eagle wind farm				476	pre-construction	2024		offshore hard mount						Iberdrola Renovables Energia SA		54.8506	13.8014	exact	Sagard				https://gem.wiki/Baltic_Eagle_wind_farm	L916195	G919992	ES0144580Y14	1	476	476	0	2064	2104	2144	0	0	0	0	476	476	476	476	476	476	476	476
wind	Ireland	Europe	Northern Europe	Barnesmore wind farm	1		Golagh	15	operating	1997		onshore							Iberdrola Renovables Energia SA	54.6976	-7.9378	exact		County Donegal			https://gem.wiki/Barnesmore_wind_farm	L910161	G912988	ES0144580Y14	1	15	15	27	2037	2077	2117	15	15	15	15	15	15	15	15	15	15	15	15
wind	Mexico	Americas	Latin America and the Caribbean	Bii Nee Stipa wind farm	1	Parque Eólico Bii Nee Stipa	Stipa Nayaá	26	operating	2010		onshore						Iberdrola Renovables Energia SA		16.5106	-94.9689	exact	Juchitán	Heroica Ciudad de Juchitán de Zaragoza		Oaxaca	https://gem.wiki/Bii_Nee_Stipa_wind_farm	L905220	G907109	ES0144580Y14	1	100		14	2050	2090	2130	26	26	26	26	26	26	26	26	26	26	26	26
wind	Mexico	Americas	Latin America and the Caribbean	Bii Nee Stipa wind farm	4	Parque Eólico Bii Nee Stipa	Stipa Nayaá, El Retiro	74	operating	2014		onshore						Iberdrola Renovables Energia SA		16.5106	-94.9689	exact	Juchitán	Heroica Ciudad de Juchitán de Zaragoza		Oaxaca	https://gem.wiki/Bii_Nee_Stipa_wind_farm	L905220	G907110	ES0144580Y14	1	100	100	10	2054	2094	2134	74	74	74	74	74	74	74	74	74	74	74	74
wind	Spain	Europe	Southern Europe	Boquerón (Iberdrola) wind farm			Sierra de Boqueron	22	operating			onshore						Iberdrola Renovables Energia SA		39.1711	-1.2278	exact	Villa de Ves		Albacete	Castile-La Mancha	https://gem.wiki/Boquerón_(Iberdrola)_wind_farm	L912032	G915086	ES0144580Y14	1	22	22	-99	40	80	120	22	22	22	22	22	22	22	22	22	22	22	22
wind	Spain	Europe	Southern Europe	Bordecorex Norte wind farm	1			18	operating	2006		onshore						Iberdrola Renovables Energia SA		41.3801	-2.7201	approximate	Velamazán		Soria	Castilla y León	https://gem.wiki/Bordecorex_Norte_wind_farm	L910994	G915909	ES0144580Y14	1	44		18	2046	2086	2126	18	18	18	18	18	18	18	18	18	18	18	18
wind	Spain	Europe	Southern Europe	Bordecorex Norte wind farm	2			26	operating	2006		onshore						Iberdrola Renovables Energia SA		41.3801	-2.7201	approximate	Velamazán		Soria	Castilla y León	https://gem.wiki/Bordecorex_Norte_wind_farm	L910994	G913917	ES0144580Y14	1	44	44	18	2046	2086	2126	26	26	26	26	26	26	26	26	26	26	26	26
wind	Spain	Europe	Southern Europe	Bullana wind farm				38	operating	2009		onshore						Iberdrola Renovables Energia SA		41.2596	-2.3801	exact			Soria	Castile and León	https://gem.wiki/Bullana_wind_farm	L914048	G917426	ES0144580Y14	1	38	38	15	2049	2089	2129	38	38	38	38	38	38	38	38	38	38	38	38
wind	Spain	Europe	Southern Europe	Buniel wind farm				114	construction	2023		onshore						Iberdrola Renovables Energia SA; Global Ottowa		42.2764	-3.7909	approximate	Albillos		Burgos	Castilla y León	https://gem.wiki/Buniel_wind_farm	L915766	G919489	ES0144580Y14	0.5	114	114	1	2063	2103	2143	0	0	0	57	57	57	57	57	57	57	57	57
wind	Spain	Europe	Southern Europe	Bureba wind farm				12	operating	2010		onshore						Iberdrola Renovables Energia SA		42.5408	-3.4101	exact			Burgos	Castile and León	https://gem.wiki/Bureba_wind_farm	L908797	G911519	ES0144580Y14	1	12	12	14	2050	2090	2130	12	12	12	12	12	12	12	12	12	12	12	12
wind	Spain	Europe	Southern Europe	Cabezuelo wind farm			El Cabezuelo	30	operating	2006		onshore						Iberdrola Renovables Energia SA		39.2333	-1.7501	exact			Albacete	Castile-La Mancha	https://gem.wiki/Cabezuelo_wind_farm	L913227	G916463	ES0144580Y14	1	30	30	18	2046	2086	2126	30	30	30	30	30	30	30	30	30	30	30	30
wind	Spain	Europe	Southern Europe	Cabimonteros wind farm				50	operating	2001		onshore						Iberdrola Renovables Energia SA		42.2476	-2.2543	exact				Rioja	https://gem.wiki/Cabimonteros_wind_farm	L914874	G918413	ES0144580Y14	1	50	50	23	2041	2081	2121	50	50	50	50	50	50	50	50	50	50	50	50
wind	Brazil	Americas	Latin America and the Caribbean	Caetité Neoenergia wind farm	1	Complexo Eólico Caetité (Neoenergia)		30	operating	2014		onshore						Iberdrola Neoenergia		-14.1846	-42.495	exact	Caetité		Região Geográfica Intermediária de Guanambi	Bahia	https://gem.wiki/Caetité_Neoenergia_wind_farm	L905334	G907064	ES0144580Y14	1	90		10	2054	2094	2134	30	30	30	30	30	30	30	30	30	30	30	30
wind	Brazil	Americas	Latin America and the Caribbean	Caetité Neoenergia wind farm	2	Complexo Eólico Caetité (Neoenergia)		30	operating	2014		onshore						Iberdrola Neoenergia		-14.1846	-42.495	exact	Caetité		Região Geográfica Intermediária de Guanambi	Bahia	https://gem.wiki/Caetité_Neoenergia_wind_farm	L905334	G907065	ES0144580Y14	1	90		10	2054	2094	2134	30	30	30	30	30	30	30	30	30	30	30	30
wind	Brazil	Americas	Latin America and the Caribbean	Caetité Neoenergia wind farm	3	Complexo Eólico Caetité (Neoenergia)		30	operating	2014		onshore						Iberdrola Neoenergia		-14.2194	-42.507	exact	Caetité		Região Geográfica Intermediária de Guanambi	Bahia	https://gem.wiki/Caetité_Neoenergia_wind_farm	L905334	G907066	ES0144580Y14	1	90	90	10	2054	2094	2134	30	30	30	30	30	30	30	30	30	30	30	30
wind	Brazil	Americas	Latin America and the Caribbean	Calangos wind farm	1	Complexo Eólico Calangos		30	operating	2016		onshore						Iberdrola Neoenergia		-6.0339	-36.544	exact	Bodó		Região Geográfica Intermediária de Caicó	Rio Grande do Norte	https://gem.wiki/Calangos_wind_farm	L905335	G907067	ES0144580Y14	1	234		8	2056	2096	2136	30	30	30	30	30	30	30	30	30	30	30	30
wind	Brazil	Americas	Latin America and the Caribbean	Calangos wind farm	2	Complexo Eólico Calangos		30	operating	2016		onshore						Iberdrola Neoenergia		-6.0166	-36.4835	exact	Bodó		Região Geográfica Intermediária de Caicó	Rio Grande do Norte	https://gem.wiki/Calangos_wind_farm	L905335	G907068	ES0144580Y14	1	234		8	2056	2096	2136	30	30	30	30	30	30	30	30	30	30	30	30
wind	Brazil	Americas	Latin America and the Caribbean	Calangos wind farm	3	Complexo Eólico Calangos		30	operating	2016		onshore						Iberdrola Neoenergia		-6.0489	-36.546	exact	Bodó		Região Geográfica Intermediária de Caicó	Rio Grande do Norte	https://gem.wiki/Calangos_wind_farm	L905335	G907069	ES0144580Y14	1	234		8	2056	2096	2136	30	30	30	30	30	30	30	30	30	30	30	30
wind	Brazil	Americas	Latin America and the Caribbean	Calangos wind farm	4	Complexo Eólico Calangos		30	operating	2016		onshore						Iberdrola Neoenergia		-6.0236	-36.472	exact	Bodó		Região Geográfica Intermediária de Caicó	Rio Grande do Norte	https://gem.wiki/Calangos_wind_farm	L905335	G907070	ES0144580Y14	1	234		8	2056	2096	2136	30	30	30	30	30	30	30	30	30	30	30	30
wind	Brazil	Americas	Latin America and the Caribbean	Calangos wind farm	5	Complexo Eólico Calangos		30	operating	2016		onshore						Iberdrola Neoenergia		-6.0303	-36.488	exact	Bodó		Região Geográfica Intermediária de Caicó	Rio Grande do Norte	https://gem.wiki/Calangos_wind_farm	L905335	G907071	ES0144580Y14	1	234		8	2056	2096	2136	30	30	30	30	30	30	30	30	30	30	30	30
wind	Brazil	Americas	Latin America and the Caribbean	Calangos wind farm	6	Complexo Eólico Calangos		30	operating	2016		onshore						Iberdrola Neoenergia		-6.0005	-36.4498	exact	Bodó		Região Geográfica Intermediária de Caicó	Rio Grande do Norte	https://gem.wiki/Calangos_wind_farm	L905335	G907072	ES0144580Y14	1	234		8	2056	2096	2136	30	30	30	30	30	30	30	30	30	30	30	30
wind	Brazil	Americas	Latin America and the Caribbean	Calangos wind farm	Santana 1	Complexo Eólico Calangos		30	operating	2016		onshore						Iberdrola Neoenergia		-6.0535	-36.4556	exact	Bodó		Região Geográfica Intermediária de Caicó	Rio Grande do Norte	https://gem.wiki/Calangos_wind_farm	L905335	G907073	ES0144580Y14	1	234		8	2056	2096	2136	30	30	30	30	30	30	30	30	30	30	30	30
wind	Brazil	Americas	Latin America and the Caribbean	Calangos wind farm	Santana 2	Complexo Eólico Calangos		24	operating	2016		onshore						Iberdrola Neoenergia		-6.0428	-36.464	exact	Lagoa Nova		Região Geográfica Intermediária de Caicó	Rio Grande do Norte	https://gem.wiki/Calangos_wind_farm	L905335	G907074	ES0144580Y14	1	234	234	8	2056	2096	2136	24	24	24	24	24	24	24	24	24	24	24	24
wind	Spain	Europe	Southern Europe	Callejas wind farm				50	operating	2004		onshore						Iberdrola Renovables Energia SA		39.633	-1.8131	exact			Cuenca	Castile-La Mancha	https://gem.wiki/Callejas_wind_farm	L914876	G918416	ES0144580Y14	1	50	50	20	2044	2084	2124	50	50	50	50	50	50	50	50	50	50	50	50
wind	Spain	Europe	Southern Europe	Campalbo wind farm				49	operating	2002		onshore						Iberdrola Renovables Energia SA		39.8878	-1.2496	exact	Graja de Campalbo		Cuenca	Castile-La Mancha	https://gem.wiki/Campalbo_wind_farm	L914777	G918282	ES0144580Y14	1	49	49	22	2042	2082	2122	49	49	49	49	49	49	49	49	49	49	49	49
wind	Spain	Europe	Southern Europe	Campisábalos wind farm				24	operating	2002		onshore						Iberdrola Renovables Energia SA		41.2965	-3.1729	exact	Campisábalos		Guadalajara	Castile-La Mancha	https://gem.wiki/Campisábalos_wind_farm	L912352	G915452	ES0144580Y14	1	24	24	22	2042	2082	2122	24	24	24	24	24	24	24	24	24	24	24	24
wind	Spain	Europe	Southern Europe	Canalejas wind farm				19	operating	2005		onshore						Iberdrola Renovables Energia SA		39.8501	-0.7501	exact		Castelló / Castellón		Valencian Community	https://gem.wiki/Canalejas_wind_farm	L911360	G914329	ES0144580Y14	1	19	19	19	2045	2085	2125	19	19	19	19	19	19	19	19	19	19	19	19
wind	Spain	Europe	Southern Europe	Cañoneras wind farm	1			18	operating	2008		onshore						Iberdrola Renovables Energia SA; Siroco Capital SCR SA		43.1448	-3.4958	exact	Soba	Asón-Agüera		Cantabria	https://gem.wiki/Cañoneras_wind_farm	L909831	G913931	ES0144580Y14	0.5	32		16	2048	2088	2128	9	9	9	9	9	9	9	9	9	9	9	9
wind	Spain	Europe	Southern Europe	Cañoneras wind farm	2			14	operating	2010		onshore						Iberdrola Renovables Energia SA; Siroco Capital SCR SA		43.1448	-3.4958	exact	Soba	Asón-Agüera		Cantabria	https://gem.wiki/Cañoneras_wind_farm	L909831	G912618	ES0144580Y14	0.5	32	32	14	2050	2090	2130	7	7	7	7	7	7	7	7	7	7	7	7
wind	Spain	Europe	Southern Europe	Cantalojas wind farm				18	operating	2004		onshore						Iberdrola Renovables Energia SA		41.2301	-3.2401	approximate	Cantalojas		Guadalajara	Castilla La Mancha	https://gem.wiki/Cantalojas_wind_farm	L911008	G913932	ES0144580Y14	1	18	18	20	2044	2084	2124	18	18	18	18	18	18	18	18	18	18	18	18
wind	Spain	Europe	Southern Europe	Capiechamartín wind farm				34	operating	2021		onshore						Iberdrola Renovables Energia SA		43.4357	-6.6075	exact	Tineo		Asturias	Asturias	https://gem.wiki/Capiechamartín_wind_farm	L913685	G917013	ES0144580Y14	1	34	34	3	2061	2101	2141	0	34	34	34	34	34	34	34	34	34	34	34
wind	Spain	Europe	Southern Europe	Capiruza wind farm	1		Capiruza IA	26	operating	2003		onshore						Iberdrola Renovables Energia SA		38.7854	-1.9917	exact			Albacete	Castile-La Mancha	https://gem.wiki/Capiruza_wind_farm	L912355	G917768	ES0144580Y14	1	92		21	2043	2083	2123	26	26	26	26	26	26	26	26	26	26	26	26
wind	Spain	Europe	Southern Europe	Capiruza wind farm	2			42	operating	2003		onshore						Iberdrola Renovables Energia SA		38.7854	-1.9917	exact			Albacete	Castile-La Mancha	https://gem.wiki/Capiruza_wind_farm	L912355	G915455	ES0144580Y14	1	92		21	2043	2083	2123	42	42	42	42	42	42	42	42	42	42	42	42
wind	Spain	Europe	Southern Europe	Capiruza wind farm	1 Ampliacíon		Capiruza IB	24	operating	2014		onshore						Iberdrola Renovables Energia SA		38.7854	-1.9917	exact			Albacete	Castile-La Mancha	https://gem.wiki/Capiruza_wind_farm	L912355	G915914	ES0144580Y14	1	92	92	10	2054	2094	2134	24	24	24	24	24	24	24	24	24	24	24	24
wind	Spain	Europe	Southern Europe	Carrascosa wind farm				38	operating	2006		onshore						Iberdrola Renovables Energia SA		40.0093	-2.761	exact	Campos del Paraíso		Cuenca	Castile-La Mancha	https://gem.wiki/Carrascosa_wind_farm	L914054	G917432	ES0144580Y14	1	38	38	18	2046	2086	2126	38	38	38	38	38	38	38	38	38	38	38	38
wind	Spain	Europe	Southern Europe	Carrasquillo wind farm				49	operating	2003		onshore						Iberdrola Renovables Energia SA		42.2295	-4.1778	exact			Burgos	Castile and León	https://gem.wiki/Carrasquillo_wind_farm	L914778	G918283	ES0144580Y14	1	49	49	21	2043	2083	2123	49	49	49	49	49	49	49	49	49	49	49	49
wind	Spain	Europe	Southern Europe	Castrobarto wind farm				44	announced			onshore						Iberdrola Renovables Energia SA		42.3448	-3.6812	approximate	Valle de Mena		Burgos	Castilla y León	https://gem.wiki/Castrobarto_wind_farm	L914455	G917911	ES0144580Y14	1	44	44	-99	40	80	120	0	0	0	0	0	0	0	0	0	44	44	44
wind	Portugal	Europe	Southern Europe	Catefica wind farm			Parque Eólico Catefica	18	operating	2005		onshore						Iberdrola Renovables Energia SA		39.0501	-9.2301	exact	Dois Portos e Runa	Lisbon			https://gem.wiki/Catefica_wind_farm	L911010	G913934	ES0144580Y14	1	18	18	19	2045	2085	2125	18	18	18	18	18	18	18	18	18	18	18	18
wind	Spain	Europe	Southern Europe	Cavar wind farm	1		Cavar onshore wind farm complex	28	operating	2020		onshore						Iberdrola Renovables Energia SA		42.2182	-1.693	approximate	Cadreita			Navarra	https://gem.wiki/Cavar_wind_farm	L913009	G916213	ES0144580Y14	1	112		4	2060	2100	2140	28	28	28	28	28	28	28	28	28	28	28	28
wind	Spain	Europe	Southern Europe	Cavar wind farm	2		Cavar onshore wind farm complex	28	operating	2020		onshore						Iberdrola Renovables Energia SA		42.2182	-1.693	approximate	Cadreita			Navarra	https://gem.wiki/Cavar_wind_farm	L913009	G916214	ES0144580Y14	1	112		4	2060	2100	2140	28	28	28	28	28	28	28	28	28	28	28	28
wind	Spain	Europe	Southern Europe	Cavar wind farm	3		Cavar onshore wind farm complex	56	operating	2020		onshore						Iberdrola Renovables Energia SA		42.2182	-1.693	approximate	Cadreita			Navarra	https://gem.wiki/Cavar_wind_farm	L913009	G918815	ES0144580Y14	1	112	112	4	2060	2100	2140	56	56	56	56	56	56	56	56	56	56	56	56
wind	Spain	Europe	Southern Europe	Cerro Blanco (Acciona Energía/Iberdrola) wind farm			Cerroblanco	48	operating	2007		onshore						Acciona Energía; Iberdrola SA		38.7315	-2.4171	exact			Albacete	Castile-La Mancha	https://gem.wiki/Cerro_Blanco_(Acciona_Energía/Iberdrola)_wind_farm	L914671	G918157	ES0144580Y14	0.5	48	48	17	2047	2087	2127	24	24	24	24	24	24	24	24	24	24	24	24
wind	Spain	Europe	Southern Europe	Cerro Blanco (Iberdrola) wind farm				42	operating	2008		onshore						Iberdrola Renovables Energia SA		42.5375	-3.4066	exact			Burgos	Castile and León	https://gem.wiki/Cerro_Blanco_(Iberdrola)_wind_farm	L914337	G917770	ES0144580Y14	1	42	42	16	2048	2088	2128	42	42	42	42	42	42	42	42	42	42	42	42
wind	Spain	Europe	Southern Europe	Cerro Calderón wind farm	1			50	operating	2004		onshore						Iberdrola Renovables Energia SA		39.4544	-2.2418	exact			Cuenca	Castile-La Mancha	https://gem.wiki/Cerro_Calderón_wind_farm	L914885	G918429	ES0144580Y14	1	50	50	20	2044	2084	2124	50	50	50	50	50	50	50	50	50	50	50	50
wind	Honduras	Americas	Latin America and the Caribbean	Cerro De Hula wind farm	1	Proyecto Eólico Cerro de Hula	Parque Eólico Santa Ana	102	operating	2011		onshore						Iberdrola SA		13.9354	-87.2374	exact		Santa Ana		Francisco Morazán	https://gem.wiki/Cerro_De_Hula_wind_farm	L905586	G907674	ES0144580Y14	1	102	102	13	2051	2091	2131	102	102	102	102	102	102	102	102	102	102	102	102
wind	Spain	Europe	Southern Europe	Cerro De La Higuera wind farm				44	operating	2009		onshore						Iberdrola Renovables Energia SA		36.9258	-4.8848	exact		Guadalteba	Malaga	Andalusia	https://gem.wiki/Cerro_De_La_Higuera_wind_farm	L914456	G917912	ES0144580Y14	1	44	44	15	2049	2089	2129	44	44	44	44	44	44	44	44	44	44	44	44
wind	Spain	Europe	Southern Europe	Cerro De La Punta wind farm				24	operating	1999		onshore							Iberdrola Renovables Energia SA	38.9864	-1.3847	exact			Albacete	Castile-La Mancha	https://gem.wiki/Cerro_De_La_Punta_wind_farm	L912361	G915461	ES0144580Y14	1	24	24	25	2039	2079	2119	24	24	24	24	24	24	24	24	24	24	24	24
wind	Spain	Europe	Southern Europe	Cerro De La Silla wind farm				15	operating	2005		onshore						Iberdrola Renovables Energia SA		38.806	-0.9529	exact	Almansa		Albacete	Castile-La Mancha	https://gem.wiki/Cerro_De_La_Silla_wind_farm	L910187	G913016	ES0144580Y14	1	15	15	19	2045	2085	2125	15	15	15	15	15	15	15	15	15	15	15	15
wind	Spain	Europe	Southern Europe	Cerro Del Palo wind farm				50	operating	2004		onshore						Iberdrola Renovables Energia SA		39.4511	-2.227	exact			Cuenca	Castile-La Mancha	https://gem.wiki/Cerro_Del_Palo_wind_farm	L914887	G918431	ES0144580Y14	1	50	50	20	2044	2084	2124	50	50	50	50	50	50	50	50	50	50	50	50
wind	Spain	Europe	Southern Europe	Cerro Revolcado wind farm				26	operating	2004		onshore						Iberdrola Renovables Energia SA		38.7292	-1.0762	exact			Albacete	Castile-La Mancha	https://gem.wiki/Cerro_Revolcado_wind_farm	L912764	G915917	ES0144580Y14	1	26	26	20	2044	2084	2124	26	26	26	26	26	26	26	26	26	26	26	26
wind	Spain	Europe	Southern Europe	Cerro Vicente wind farm	1			39	operating	2003		onshore						Iberdrola Renovables Energia SA		38.8299	-1.6816	exact	Chinchilla de Monte-Aragón		Albacete	Castile-La Mancha	https://gem.wiki/Cerro_Vicente_wind_farm	L913233	G917513	ES0144580Y14	1	69		21	2043	2083	2123	39	39	39	39	39	39	39	39	39	39	39	39
wind	Spain	Europe	Southern Europe	Cerro Vicente wind farm	2			30	operating	2003		onshore						Iberdrola Renovables Energia SA		38.8299	-1.6816	exact	Chinchilla de Monte-Aragón		Albacete	Castile-La Mancha	https://gem.wiki/Cerro_Vicente_wind_farm	L913233	G916469	ES0144580Y14	1	69	69	21	2043	2083	2123	30	30	30	30	30	30	30	30	30	30	30	30
wind	Brazil	Americas	Latin America and the Caribbean	Chafariz wind farm	1	Complexo Eólico Chafariz		35	operating	2021		onshore						Iberdrola Neoenergia		-6.9729	-36.8793	exact	Santa Luzia	Região Metropolitana de Patos	Região Geográfica Intermediária de Patos	Paraíba	https://gem.wiki/Chafariz_wind_farm	L905336	G907075	ES0144580Y14	1	475		3	2061	2101	2141	0	35	35	35	35	35	35	35	35	35	35	35
wind	Brazil	Americas	Latin America and the Caribbean	Chafariz wind farm	2	Complexo Eólico Chafariz		35	operating	2021		onshore						Iberdrola Neoenergia		-6.9968	-36.894	exact	Santa Luzia	Região Metropolitana de Patos	Região Geográfica Intermediária de Patos	Paraíba	https://gem.wiki/Chafariz_wind_farm	L905336	G907076	ES0144580Y14	1	475		3	2061	2101	2141	0	35	35	35	35	35	35	35	35	35	35	35
wind	Brazil	Americas	Latin America and the Caribbean	Chafariz wind farm	3	Complexo Eólico Chafariz		35	operating	2021		onshore						Iberdrola Neoenergia		-7.0016	-36.8983	exact	Santa Luzia	Região Metropolitana de Patos	Região Geográfica Intermediária de Patos	Paraíba	https://gem.wiki/Chafariz_wind_farm	L905336	G907077	ES0144580Y14	1	475		3	2061	2101	2141	0	35	35	35	35	35	35	35	35	35	35	35
wind	Brazil	Americas	Latin America and the Caribbean	Chafariz wind farm	4	Complexo Eólico Chafariz		35	operating	2021		onshore						Iberdrola Neoenergia		-7.0337	-36.9355	exact		Região Metropolitana de Patos	Região Geográfica Intermediária de Patos	Paraíba	https://gem.wiki/Chafariz_wind_farm	L905336	G907078	ES0144580Y14	1	475		3	2061	2101	2141	0	35	35	35	35	35	35	35	35	35	35	35
wind	Brazil	Americas	Latin America and the Caribbean	Chafariz wind farm	5	Complexo Eólico Chafariz		35	operating	2021		onshore						Iberdrola Neoenergia		-7.0039	-36.9131	exact	Santa Luzia	Região Metropolitana de Patos	Região Geográfica Intermediária de Patos	Paraíba	https://gem.wiki/Chafariz_wind_farm	L905336	G907079	ES0144580Y14	1	475		3	2061	2101	2141	0	35	35	35	35	35	35	35	35	35	35	35
wind	Brazil	Americas	Latin America and the Caribbean	Chafariz wind farm	6	Complexo Eólico Chafariz		31	operating	2021		onshore						Iberdrola Neoenergia		-6.9786	-36.8539	exact	Santa Luzia	Região Metropolitana de Patos	Região Geográfica Intermediária de Patos	Paraíba	https://gem.wiki/Chafariz_wind_farm	L905336	G907080	ES0144580Y14	1	475		3	2061	2101	2141	0	31	31	31	31	31	31	31	31	31	31	31
wind	Brazil	Americas	Latin America and the Caribbean	Chafariz wind farm	7	Complexo Eólico Chafariz		35	operating	2021		onshore						Iberdrola Neoenergia		-6.924	-36.8607	exact	Santa Luzia	Região Metropolitana de Patos	Região Geográfica Intermediária de Patos	Paraíba	https://gem.wiki/Chafariz_wind_farm	L905336	G907081	ES0144580Y14	1	475		3	2061	2101	2141	0	35	35	35	35	35	35	35	35	35	35	35
wind	Brazil	Americas	Latin America and the Caribbean	Chafariz wind farm	Canoas 2	Complexo Eólico Chafariz		35	operating	2021		onshore						Iberdrola Neoenergia		-6.8825	-36.7914	exact	Santa Luzia	Região Metropolitana de Patos	Região Geográfica Intermediária de Patos	Paraíba	https://gem.wiki/Chafariz_wind_farm	L905336	G907082	ES0144580Y14	1	475		3	2061	2101	2141	0	35	35	35	35	35	35	35	35	35	35	35
wind	Brazil	Americas	Latin America and the Caribbean	Chafariz wind farm	Canoas 3	Complexo Eólico Chafariz		35	operating	2021		onshore						Iberdrola Neoenergia		-6.8722	-36.7594	exact		Região Metropolitana de Patos	Região Geográfica Intermediária de Patos	Paraíba	https://gem.wiki/Chafariz_wind_farm	L905336	G907083	ES0144580Y14	1	475		3	2061	2101	2141	0	35	35	35	35	35	35	35	35	35	35	35
wind	Brazil	Americas	Latin America and the Caribbean	Chafariz wind farm	Canoas 4	Complexo Eólico Chafariz		35	operating	2021		onshore						Iberdrola Neoenergia		-6.8436	-36.7355	exact	São José do Sabugi	Região Metropolitana de Patos	Região Geográfica Intermediária de Patos	Paraíba	https://gem.wiki/Chafariz_wind_farm	L905336	G907084	ES0144580Y14	1	475		3	2061	2101	2141	0	35	35	35	35	35	35	35	35	35	35	35
wind	Brazil	Americas	Latin America and the Caribbean	Chafariz wind farm	Lagoa 3	Complexo Eólico Chafariz		35	operating	2021		onshore						Iberdrola Neoenergia		-6.8712	-36.8262	exact	São José do Sabugi	Região Metropolitana de Patos	Região Geográfica Intermediária de Patos	Paraíba	https://gem.wiki/Chafariz_wind_farm	L905336	G907085	ES0144580Y14	1	475		3	2061	2101	2141	0	35	35	35	35	35	35	35	35	35	35	35
wind	Brazil	Americas	Latin America and the Caribbean	Chafariz wind farm	Lagoa 4	Complexo Eólico Chafariz		21	operating	2021		onshore						Iberdrola Neoenergia		-6.8824	-36.8415	exact	Santa Luzia	Região Metropolitana de Patos	Região Geográfica Intermediária de Patos	Paraíba	https://gem.wiki/Chafariz_wind_farm	L905336	G907086	ES0144580Y14	1	475		3	2061	2101	2141	0	21	21	21	21	21	21	21	21	21	21	21
wind	Brazil	Americas	Latin America and the Caribbean	Chafariz wind farm	Ventos de Arapuá 1	Complexo Eólico Chafariz		24	operating	2021		onshore						Iberdrola Neoenergia		-7.0482	-36.9524	exact		Região Metropolitana de Patos	Região Geográfica Intermediária de Patos	Paraíba	https://gem.wiki/Chafariz_wind_farm	L905336	G907087	ES0144580Y14	1	475		3	2061	2101	2141	0	24	24	24	24	24	24	24	24	24	24	24
wind	Brazil	Americas	Latin America and the Caribbean	Chafariz wind farm	Ventos de Arapuá 2	Complexo Eólico Chafariz		35	operating	2021		onshore						Iberdrola Neoenergia		-7.0292	-36.9624	exact		Região Metropolitana de Patos	Região Geográfica Intermediária de Patos	Paraíba	https://gem.wiki/Chafariz_wind_farm	L905336	G907088	ES0144580Y14	1	475		3	2061	2101	2141	0	35	35	35	35	35	35	35	35	35	35	35
wind	Brazil	Americas	Latin America and the Caribbean	Chafariz wind farm	Ventos de Arapuá 3	Complexo Eólico Chafariz		14	operating	2021		onshore						Iberdrola Neoenergia		-7.0508	-36.9679	exact		Região Metropolitana de Patos	Região Geográfica Intermediária de Patos	Paraíba	https://gem.wiki/Chafariz_wind_farm	L905336	G907089	ES0144580Y14	1	475	475	3	2061	2101	2141	0	14	14	14	14	14	14	14	14	14	14	14
wind	Spain	Europe	Southern Europe	Chimiche wind farm	2			18	operating	2018		onshore						Iberdrola Renovables Energia SA [50%]; Inversiones Financieras Isla de Tenerife SL [50%]		28.1121	-16.5057	exact			Santa Cruz de Tenerife		https://gem.wiki/Chimiche_wind_farm	L911017	G913942	ES0144580Y14	0.5	18	18	6	2058	2098	2138	9	9	9	9	9	9	9	9	9	9	9	9
wind	Spain	Europe	Southern Europe	Chorreaderos wind farm	Altos			21	operating			onshore						Iberdrola Renovables Energia SA		36.6901	-6.1301	approximate	Jerez de la Frontera		Cádiz	Andalucía	https://gem.wiki/Chorreaderos_wind_farm	L911836	G914861	ES0144580Y14	1	51		-99	40	80	120	21	21	21	21	21	21	21	21	21	21	21	21
wind	Spain	Europe	Southern Europe	Chorreaderos wind farm	Bajos			30	operating			onshore						Iberdrola Renovables Energia SA		36.6801	-6.1301	approximate	Jerez de la Frontera		Cádiz	Andalucía	https://gem.wiki/Chorreaderos_wind_farm	L911836	G916471	ES0144580Y14	1	51	51	-99	40	80	120	30	30	30	30	30	30	30	30	30	30	30	30
wind	Spain	Europe	Southern Europe	Clares wind farm				32	operating	2006		onshore						Iberdrola Renovables Energia SA		41.0337	-2.1434	exact	Maranchón		Guadalajara	Castile-La Mancha	https://gem.wiki/Clares_wind_farm	L913497	G916782	ES0144580Y14	1	32	32	18	2046	2086	2126	32	32	32	32	32	32	32	32	32	32	32	32
wind	Ireland	Europe	Northern Europe	Clarus wind farm				1000	announced			offshore floating						DP Energy; Iberdrola SA		52.7101	-10.2701	approximate					https://gem.wiki/Clarus_wind_farm	L916291	G920103	ES0144580Y14	0.5	1000	1000	-99	40	80	120	0	0	0	0	0	0	0	0	0	500	500	500
wind	Spain	Europe	Southern Europe	Conesa wind farm	2			32	operating			onshore						Iberdrola Renovables Energia SA		41.5062	1.2624	exact	Conesa	Conca de Barberà	Tarragona	Catalonia	https://gem.wiki/Conesa_wind_farm	L913012	G916783	ES0144580Y14	1	32	32	-99	40	80	120	32	32	32	32	32	32	32	32	32	32	32	32
wind	Spain	Europe	Southern Europe	Conquista De La Sierra wind farm				50	pre-construction			onshore						Iberdrola Renovables Energia SA		39.3301	-5.7306	approximate	Conquista de la Sierra		Trujillo	Extremadura	https://gem.wiki/Conquista_De_La_Sierra_wind_farm	L914899	G918447	ES0144580Y14	1	50	50	-99	40	80	120	0	0	0	0	0	0	0	0	0	50	50	50
wind	Spain	Europe	Southern Europe	Cordel-Vidural wind farm				37	operating	2021		onshore						Iberdrola Renovables Energia SA		43.5391	-6.7234	approximate	Navia			Asturias	https://gem.wiki/Cordel-Vidural_wind_farm	L913989	G917361	ES0144580Y14	1	37	37	3	2061	2101	2141	0	37	37	37	37	37	37	37	37	37	37	37
wind	Spain	Europe	Southern Europe	Cortijo La Linera wind farm				28	operating	2008		onshore						Iberdrola Renovables Energia SA		38.1144	-2.5711	exact	Santiago-Pontones		Jaén	Andalusia	https://gem.wiki/Cortijo_La_Linera_wind_farm	L913013	G916218	ES0144580Y14	1	28	28	16	2048	2088	2128	28	28	28	28	28	28	28	28	28	28	28	28
wind	Spain	Europe	Southern Europe	Cruz De Carrutero wind farm				40	operating	2011		onshore						Iberdrola Renovables Energia SA		42.2505	-4.7189	exact			Palencia	Castile and León	https://gem.wiki/Cruz_De_Carrutero_wind_farm	L914201	G917605	ES0144580Y14	1	40	40	13	2051	2091	2131	40	40	40	40	40	40	40	40	40	40	40	40
wind	Spain	Europe	Southern Europe	Cruz wind farm	1		Cruz San Martin	40	operating	2003		onshore						Iberdrola Renovables Energia SA		39.858	-1.5798	exact			Cuenca	Castile-La Mancha	https://gem.wiki/Cruz_wind_farm	L912769	G917606	ES0144580Y14	1	66		21	2043	2083	2123	40	40	40	40	40	40	40	40	40	40	40	40
wind	Spain	Europe	Southern Europe	Cruz wind farm	2		Cruz San Martin	26	operating	2003		onshore						Iberdrola Renovables Energia SA		39.858	-1.5798	exact			Cuenca	Castile-La Mancha	https://gem.wiki/Cruz_wind_farm	L912769	G915922	ES0144580Y14	1	66	66	21	2043	2083	2123	26	26	26	26	26	26	26	26	26	26	26	26
wind	Hungary	Europe	Eastern Europe	Csoma wind farm	1			38	operating	2010		onshore						Iberdrola Renovables Energia SA		47.2033	16.859	approximate	Komárom	Komárom-Esztergom			https://gem.wiki/Csoma_wind_farm	L914058	G917436	ES0144580Y14	1	38	38	14	2050	2090	2130	38	38	38	38	38	38	38	38	38	38	38	38
wind	Spain	Europe	Southern Europe	Cuesta Colorada wind farm				50	operating	2003		onshore						Iberdrola Renovables Energia SA		39.4663	-2.2057	exact			Cuenca	Castile-La Mancha	https://gem.wiki/Cuesta_Colorada_wind_farm	L914903	G918451	ES0144580Y14	1	50	50	21	2043	2083	2123	50	50	50	50	50	50	50	50	50	50	50	50
wind	Taiwan	Asia	Eastern Asia	Da Chungbu floating wind farm		大中部, 大中部離岸風力發電計畫, 大中部離岸風電	Da Zhongbu, Great Central Offshore wind farm, Da Chung Bu	1800	shelved			offshore floating						Iberdrola Renewables INC		24.4284	120.249	approximate				Taichung County	https://gem.wiki/Da_Chungbu_floating_wind_farm	L916904	G920978	ES0144580Y14	1	1800	1800	-99	40	80	120	0	0	0	0	0	0	0	0	0	0	0	0
wind	Spain	Europe	Southern Europe	Dólar wind farm	1			50	operating	2006		onshore						Iberdrola Renovables Energia SA		37.1766	-2.9502	exact		Comarca de Guadix	Granada	Andalusia	https://gem.wiki/Dólar_wind_farm	L914907	G918455	ES0144580Y14	1	100		18	2046	2086	2126	50	50	50	50	50	50	50	50	50	50	50	50
wind	Spain	Europe	Southern Europe	Dólar wind farm	3			50	operating	2006		onshore						Iberdrola Renovables Energia SA		37.1766	-2.9502	exact		Comarca de Guadix	Granada	Andalusia	https://gem.wiki/Dólar_wind_farm	L914907	G918456	ES0144580Y14	1	100	100	18	2046	2086	2126	50	50	50	50	50	50	50	50	50	50	50	50
wind	Spain	Europe	Southern Europe	Doña Benita Cuéllar wind farm				32	operating	2008		onshore						Iberdrola Renovables Energia SA		36.5892	-5.9911	exact	Jerez	Campiña de Jerez	Cádiz	Andalusia	https://gem.wiki/Doña_Benita_Cuéllar_wind_farm	L913500	G916786	ES0144580Y14	1	32	32	16	2048	2088	2128	32	32	32	32	32	32	32	32	32	32	32	32
wind	Mexico	Americas	Latin America and the Caribbean	Dos Arbolitos wind farm		Parque Eólico Dos Arbolitos	Bii Nee Stipa II Fase IV	70	operating	2014		onshore						Iberdrola Renovables Energia SA		16.5119	-94.9462	exact		Heroica Ciudad de Juchitán de Zaragoza		Oaxaca	https://gem.wiki/Dos_Arbolitos_wind_farm	L905343	G907111	ES0144580Y14	1	70	70	10	2054	2094	2134	70	70	70	70	70	70	70	70	70	70	70	70
wind	Spain	Europe	Southern Europe	Dos Pueblos wind farm				20	operating	2008		onshore						Iberdrola Renovables Energia SA		41.2801	-2.9401	approximate	Miedes de Atienza		Guadalajara	Castilla La Mancha	https://gem.wiki/Dos_Pueblos_wind_farm	L911533	G914521	ES0144580Y14	1	20	20	16	2048	2088	2128	20	20	20	20	20	20	20	20	20	20	20	20
wind	Spain	Europe	Southern Europe	El Candal wind farm				38	operating	2012		onshore						Iberdrola Renovables Energia SA		43.3983	-6.9301	exact			Asturias	Asturias	https://gem.wiki/El_Candal_wind_farm	L914059	G917437	ES0144580Y14	1	38	38	12	2052	2092	2132	38	38	38	38	38	38	38	38	38	38	38	38
wind	Spain	Europe	Southern Europe	El Carril wind farm				28	operating	2008		onshore						Iberdrola Renovables Energia SA		42.2884	-4.1406	approximate	Castrojeriz		Burgos	Castilla y León	https://gem.wiki/El_Carril_wind_farm	L913021	G916226	ES0144580Y14	1	28	28	16	2048	2088	2128	28	28	28	28	28	28	28	28	28	28	28	28
wind	Spain	Europe	Southern Europe	El Centenar wind farm				40	operating	2009		onshore						Iberdrola Renovables Energia SA		36.539	-5.3868	exact		Serranía de Ronda	Malaga	Andalusia	https://gem.wiki/El_Centenar_wind_farm	L914205	G917610	ES0144580Y14	1	40	40	15	2049	2089	2129	40	40	40	40	40	40	40	40	40	40	40	40
wind	Spain	Europe	Southern Europe	El Navazo wind farm	1			30	operating	2003		onshore						Iberdrola Renovables Energia SA		42.2501	-4.2001	approximate	Pedrosa del Príncipe (BU)		Burgos	Castilla y León	https://gem.wiki/El_Navazo_wind_farm	L913246	G916485	ES0144580Y14	1	30	30	21	2043	2083	2123	30	30	30	30	30	30	30	30	30	30	30	30
wind	Spain	Europe	Southern Europe	El Pradillo wind farm				23	operating	2020		onshore						Iberdrola Renovables Energia SA		41.877	-1.497	exact	Borja	Campo de Borja		Aragon	https://gem.wiki/El_Pradillo_wind_farm	L912210	G915293	ES0144580Y14	1	23	23	4	2060	2100	2140	23	23	23	23	23	23	23	23	23	23	23	23
wind	Spain	Europe	Southern Europe	El Puntal wind farm	2			15	operating	2022		onshore						Iberdrola Renovables Energia SA		37.1244	-4.8686	approximate	Sierra de Yeguas		Málaga	Andalucía	https://gem.wiki/El_Puntal_wind_farm	L910219	G913051	ES0144580Y14	1	15	15	2	2062	2102	2142	0	0	15	15	15	15	15	15	15	15	15	15
wind	Spain	Europe	Southern Europe	El Romeral wind farm				14	operating			onshore						Iberdrola Renovables Energia SA		38.9186	-1.7228	exact	Chinchilla de Monte-Aragón		Albacete	Castile-La Mancha	https://gem.wiki/El_Romeral_wind_farm	L909850	G912639	ES0144580Y14	1	14	14	-99	40	80	120	14	14	14	14	14	14	14	14	14	14	14	14
wind	Spain	Europe	Southern Europe	El Saucito wind farm			Saucito Fase B	30	operating	2009		onshore						Iberdrola Renovables Energia SA		37.5802	-7.1459	exact		El Andévalo	Huelva	Andalusia	https://gem.wiki/El_Saucito_wind_farm	L913248	G916487	ES0144580Y14	1	30	30	15	2049	2089	2129	30	30	30	30	30	30	30	30	30	30	30	30
wind	Spain	Europe	Southern Europe	El Segredal wind farm				36	operating	2012		onshore						Iberdrola Renovables Energia SA		43.4213	-6.6653	exact			Asturias	Asturias	https://gem.wiki/El_Segredal_wind_farm	L913874	G917227	ES0144580Y14	1	36	36	12	2052	2092	2132	36	36	36	36	36	36	36	36	36	36	36	36
wind	Spain	Europe	Southern Europe	El Sombrío wind farm				28	operating	2008		onshore						Iberdrola Renovables Energia SA		42.4301	-3.7301	approximate	Merindad del Río Ubierna		Burgos	Castilla y León	https://gem.wiki/El_Sombrío_wind_farm	L913023	G916228	ES0144580Y14	1	28	28	16	2048	2088	2128	28	28	28	28	28	28	28	28	28	28	28	28
wind	Spain	Europe	Southern Europe	El Tablado wind farm				20	operating	2003		onshore						Iberdrola Renovables Energia SA		41.693	-1.8344	exact			Soria	Castile and León	https://gem.wiki/El_Tablado_wind_farm	L911542	G914533	ES0144580Y14	1	20	20	21	2043	2083	2123	20	20	20	20	20	20	20	20	20	20	20	20
wind	Spain	Europe	Southern Europe	El Teruelo wind farm				43	operating	2003		onshore						Iberdrola Renovables Energia SA		42.2201	-4.2701	exact			Palencia	Castile and León	https://gem.wiki/El_Teruelo_wind_farm	L914424	G917875	ES0144580Y14	1	43	43	21	2043	2083	2123	43	43	43	43	43	43	43	43	43	43	43	43
wind	Spain	Europe	Southern Europe	El Vallito wind farm				13	pre-construction			onshore						Iberdrola Renovables Energia SA		37.1392	-3.6705	approximate	Chimiche		Santa Cruz de Tenerife	Las Islas Canarias	https://gem.wiki/El_Vallito_wind_farm	L909527	G912285	ES0144580Y14	1	13	13	-99	40	80	120	0	0	0	0	0	0	0	0	0	13	13	13
wind	Spain	Europe	Southern Europe	Elgea wind farm			Sierra de Elgea, Sierra Elgea	24	operating	2000		onshore						Iberdrola Renovables Energia SA		42.9625	-2.4892	exact		Arabako lautada/Llanada Alavesa		Autonomous Community of the Basque Country	https://gem.wiki/Elgea_wind_farm	L912382	G915484	ES0144580Y14	1	24	24	24	2040	2080	2120	24	24	24	24	24	24	24	24	24	24	24	24
wind	Spain	Europe	Southern Europe	Elgea-Urkilla wind farm			Urkilla	32	operating	2003		onshore						Iberdrola Renovables Energia SA		42.9575	-2.4458	exact		Debagoiena		Autonomous Community of the Basque Country	https://gem.wiki/Elgea-Urkilla_wind_farm	L913502	G916790	ES0144580Y14	1	32	32	21	2043	2083	2123	32	32	32	32	32	32	32	32	32	32	32	32
wind	Spain	Europe	Southern Europe	Encinillas wind farm				23	operating	2020		onshore						Iberdrola Renovables Energia SA		42.1529	-4.6922	approximate	Paredes de Nava		Palencia	Castilla y León	https://gem.wiki/Encinillas_wind_farm	L912211	G915294	ES0144580Y14	1	23	23	4	2060	2100	2140	23	23	23	23	23	23	23	23	23	23	23	23
wind	Spain	Europe	Southern Europe	Entredicho wind farm				36	operating	2003		onshore						Iberdrola Renovables Energia SA		41.324	-0.934	exact		Campo de Belchite		Aragon	https://gem.wiki/Entredicho_wind_farm	L913875	G917229	ES0144580Y14	1	36	36	21	2043	2083	2123	36	36	36	36	36	36	36	36	36	36	36	36
wind	Spain	Europe	Southern Europe	Escalon wind farm				30	operating			onshore						Iberdrola Renovables Energia SA		40.1669	-4.4048	exact		Torrijos	Toledo	Castile-La Mancha	https://gem.wiki/Escalon_wind_farm	L913256	G916495	ES0144580Y14	1	30	30	-99	40	80	120	30	30	30	30	30	30	30	30	30	30	30	30
wind	Spain	Europe	Southern Europe	Escurrillo wind farm				50	operating	2003		onshore						Iberdrola Renovables Energia SA		42.2586	-2.197	exact	Herce			Rioja	https://gem.wiki/Escurrillo_wind_farm	L914925	G918475	ES0144580Y14	1	50		21	2043	2083	2123	50	50	50	50	50	50	50	50	50	50	50	50
wind	Spain	Europe	Southern Europe	Ferreira wind farm	2			50	operating	2006		onshore						Iberdrola Renovables Energia SA		37.2174	-2.9997	exact		Comarca de Guadix	Granada	Andalusia	https://gem.wiki/Ferreira_wind_farm	L914927	G918478	ES0144580Y14	1	50	50	18	2046	2086	2126	50	50	50	50	50	50	50	50	50	50	50	50
wind	Spain	Europe	Southern Europe	Flagship Demonstrator wind farm				10	pre-construction	2025		offshore floating						Iberdrola Renovables Energia SA		27.9929	-15.357	approximate				Las Islas Canarias or País Vasco	https://gem.wiki/Flagship_Demonstrator_wind_farm	L907841	G910513	ES0144580Y14	1	10	10	-1	2065	2105	2145	0	0	0	0	0	10	10	10	10	10	10	10
wind	Spain	Europe	Southern Europe	Forgoselo (Iberdrola) wind farm				24	operating	2000		onshore						Iberdrola Renovables Energia SA		43.4747	-8.039	exact		Ferrol		Galicia	https://gem.wiki/Forgoselo_(Iberdrola)_wind_farm	L912388	G915491	ES0144580Y14	1	24	24	24	2040	2080	2120	24	24	24	24	24	24	24	24	24	24	24	24
wind	Australia	Oceania	Australia and New Zealand	Forsayth wind farm			Queensland Wind	150	announced			onshore						GE Renewable Energy [50%]; Iberdrola Australia [50%]		-18.5856	143.652	approximate	Forsayth			Queensland	https://gem.wiki/Forsayth_wind_farm	L906225	G908470	ES0144580Y14	0.5	150	150	-99	40	80	120	0	0	0	0	0	0	0	0	0	75	75	75
wind	Spain	Europe	Southern Europe	Fuendetodos wind farm	1			46	operating	2003		onshore						Iberdrola Renovables Energia SA		41.345	-0.943	exact		Campo de Belchite		Aragon	https://gem.wiki/Fuendetodos_wind_farm	L914600	G918075	ES0144580Y14	1	94		21	2043	2083	2123	46	46	46	46	46	46	46	46	46	46	46	46
wind	Spain	Europe	Southern Europe	Fuendetodos wind farm	2			48	operating	2003		onshore						Iberdrola Renovables Energia SA		41.379	-0.9601	exact		Campo de Belchite		Aragon	https://gem.wiki/Fuendetodos_wind_farm	L914600	G918173	ES0144580Y14	1	94	94	21	2043	2083	2123	48	48	48	48	48	48	48	48	48	48	48	48
wind	Spain	Europe	Southern Europe	Fuente Salada wind farm			Fuentesalada	46	operating	2011		onshore						Iberdrola Renovables Energia SA		42.3319	-4.0584	exact	Sasamón		Burgos	Castile and León	https://gem.wiki/Fuente_Salada_wind_farm	L914601	G918076	ES0144580Y14	1	46	46	13	2051	2091	2131	46	46	46	46	46	46	46	46	46	46	46	46
wind	Spain	Europe	Southern Europe	Fuenteblanca wind farm				10	operating	2021		onshore						Iberdrola Renovables Energia SA		42.3448	-3.6812	approximate	Valle de Santibáñez		Burgos	Castilla y León	https://gem.wiki/Fuenteblanca_wind_farm	L907855	G910527	ES0144580Y14	1	10	10	3	2061	2101	2141	0	10	10	10	10	10	10	10	10	10	10	10
wind	Spain	Europe	Southern Europe	Garciaz wind farm				50	pre-construction			onshore						Iberdrola Renovables Energia SA		39.4131	-5.6276	approximate	Garciaz		Trujillo	Extremadura	https://gem.wiki/Garciaz_wind_farm	L914936	G918488	ES0144580Y14	1	50	50	-99	40	80	120	0	0	0	0	0	0	0	0	0	50	50	50
wind	Spain	Europe	Southern Europe	Gatún 1F wind farm	2			17	operating	2003		onshore						Iberdrola Renovables Energia SA		42.1514	-2.041	exact				Rioja	https://gem.wiki/Gatún_1F_wind_farm	L910819	G913718	ES0144580Y14	1	17	17	21	2043	2083	2123	17	17	17	17	17	17	17	17	17	17	17	17
wind	Spain	Europe	Southern Europe	Gatún wind farm	1			50	operating	2002		onshore						Iberdrola Renovables Energia SA		42.1514	-2.041	exact				Rioja	https://gem.wiki/Gatún_wind_farm	L914939	G918491	ES0144580Y14	1	50	50	22	2042	2082	2122	50	50	50	50	50	50	50	50	50	50	50	50
wind	Spain	Europe	Southern Europe	Gavilanes wind farm	1			17	operating	2003		onshore						Iberdrola Renovables Energia SA		38.6022	-1.2915	exact	Jumilla	Altiplano	Region of Murcia	Region of Murcia	https://gem.wiki/Gavilanes_wind_farm	L910235	G913720	ES0144580Y14	1	32		21	2043	2083	2123	17	17	17	17	17	17	17	17	17	17	17	17
wind	Spain	Europe	Southern Europe	Gavilanes wind farm	Ampliación			15	operating	2007		onshore						Iberdrola Renovables Energia SA		38.608	-1.2758	exact	Jumilla	Altiplano	Region of Murcia	Region of Murcia	https://gem.wiki/Gavilanes_wind_farm	L910235	G913070	ES0144580Y14	1	32	32	17	2047	2087	2127	15	15	15	15	15	15	15	15	15	15	15	15
wind	Spain	Europe	Southern Europe	Gavina Floating Offshore wind farm				500	pre-construction			offshore floating						Iberdrola		42.185	3.1412	approximate					https://gem.wiki/Gavina_Floating_Offshore_wind_farm	L920744	G925559	ES0144580Y14	1	500	500	-99	40	80	120	0	0	0	0	0	0	0	0	0	500	500	500
wind	Spain	Europe	Southern Europe	Goia Peñote wind farm			Goia-Peñote	40	operating	2005		onshore						Iberdrola Renovables Energia SA		43.4277	-7.6894	exact	Vilalba	Terra Chá		Galicia	https://gem.wiki/Goia_Peñote_wind_farm	L914214	G917621	ES0144580Y14	1	40	40	19	2045	2085	2125	40	40	40	40	40	40	40	40	40	40	40	40
wind	Spain	Europe	Southern Europe	Gomera wind farm				18	operating	2010		onshore						Iberdrola Renovables Energia SA		37.237	-5.1028	approximate	Osuna		Sevilla	Andalucía	https://gem.wiki/Gomera_wind_farm	L911061	G913996	ES0144580Y14	1	18	18	14	2050	2090	2130	18	18	18	18	18	18	18	18	18	18	18	18
wind	Spain	Europe	Southern Europe	Grado wind farm			Grayo Adalon, Grado Montejo	27	operating	2005		onshore						Iberdrola Renovables Energia SA		39.877	-0.0558	exact		Castelló / Castellón		Valencian Community	https://gem.wiki/Grado_wind_farm	L912899	G916077	ES0144580Y14	1	27	27	19	2045	2085	2125	27	27	27	27	27	27	27	27	27	27	27	27
wind	Sweden	Europe	Northern Europe	Gretas Klackar wind farm	1			1800	pre-construction	2028		offshore hard mount						Iberdrola Renovables Energia SA		61.5259	17.697	exact					https://gem.wiki/Gretas_Klackar_wind_farm	L916240	G920167	ES0144580Y14	1	1800	1800	-4	2068	2108	2148	0	0	0	0	0	0	0	0	1800	1800	1800	1800
wind	Philippines	Asia	South-eastern Asia	Guimaras Strait Wind Energy Project	1		Guimaras Strait wind farm, Guimaras Strait I Wind Power Project, Guimaras 1 Offshore wind power project	600	pre-construction			offshore hard mount						WindKraft Group; Iberdrola Renewables INC		10.7799	122.85	approximate			Negros		https://gem.wiki/Guimaras_Strait_Wind_Energy_Project	L901299	G927558	ES0144580Y14	0.5	600	600	-99	40	80	120	0	0	0	0	0	0	0	0	0	300	300	300
wind	Taiwan	Asia	Eastern Asia	Guo Feng Offshore wind farm		果豐離岸風力發電計畫, 果豐離岸風電, 果豐離岸風場	Guo Feng, Guo-Feng Offshore	375	announced			offshore hard mount						Iberdrola Renewables INC		23.9555	119.738	approximate				Penghu County	https://gem.wiki/Guo_Feng_Offshore_wind_farm	L916920	G920998	ES0144580Y14	1	375	375	-99	40	80	120	0	0	0	0	0	0	0	0	0	375	375	375
wind	Spain	Europe	Southern Europe	Herrera La Huesa wind farm			La Huesa, Herrera II	32	operating	2021		onshore						Iberdrola Renovables Energia SA		42.3616	-3.9304	approximate	Isar		Burgos	Castilla y León	https://gem.wiki/Herrera_La_Huesa_wind_farm	L913510	G916799	ES0144580Y14	1	32	32	3	2061	2101	2141	0	32	32	32	32	32	32	32	32	32	32	32
wind	Spain	Europe	Southern Europe	Higueruela wind farm				38	operating	1999		onshore						Iberdrola Renovables Energia SA		38.9772	-1.4429	exact			Albacete	Castile-La Mancha	https://gem.wiki/Higueruela_wind_farm	L914067	G917446	ES0144580Y14	1	38	38	25	2039	2079	2119	38	38	38	38	38	38	38	38	38	38	38	38
wind	Spain	Europe	Southern Europe	Hijes wind farm				13	operating	2005		onshore						Iberdrola Renovables Energia SA		41.2789	-3.0434	exact	Hijes		Guadalajara	Castile-La Mancha	https://gem.wiki/Hijes_wind_farm	L909554	G912312	ES0144580Y14	1	13	13	19	2045	2085	2125	13	13	13	13	13	13	13	13	13	13	13	13
wind	Spain	Europe	Southern Europe	Hontalbilla wind farm	1			37	operating	2004		onshore						Iberdrola Renovables Energia SA		41.3301	-2.6401	approximate	Adradas		Soria	Castilla y León	https://gem.wiki/Hontalbilla_wind_farm	L913128	G917369	ES0144580Y14	1	66		20	2044	2084	2124	37	37	37	37	37	37	37	37	37	37	37	37
wind	Spain	Europe	Southern Europe	Hontalbilla wind farm	2			29	operating	2004		onshore						Iberdrola Renovables Energia SA		41.3301	-2.5801	approximate	Adradas		Soria	Castilla y León	https://gem.wiki/Hontalbilla_wind_farm	L913128	G916349	ES0144580Y14	1	66	66	20	2044	2084	2124	29	29	29	29	29	29	29	29	29	29	29	29
wind	Spain	Europe	Southern Europe	Hozalia wind farm				31	pre-construction			onshore						Iberdrola Renovables Energia SA		42.5892	-5.5633	approximate	Valle de Losa			Castilla y León	https://gem.wiki/Hozalia_wind_farm	L913433	G916702	ES0144580Y14	1	31	31	-99	40	80	120	0	0	0	0	0	0	0	0	0	31	31	31
[truncated: 189 more rows]
[truncated: 19 more columns]

## Sheet: Iberdrola_fossilfuel
Type	Country/area	Region	Subregion	Plant / Project name	Unit / Phase name	Plant / Project name (local)	Plant / Project name (other)	Capacity (MW)	Status	Start year	Retired year	Technology	Fuel	Country/area 1 (hydropower only)	Country/area 2 (hydropower only)	Country/area 1 Capacity (MW) (hydropower only)	Country/area 2 Capacity (MW) (hydropower only)	Owner	Parent	Latitude	Longitude	Location accuracy	City	Local area (taluk, county)	Major area (prefecture, district)	Subnational unit (state, province)	GEM.Wiki URL	GEM location ID	GEM unit/phase ID	CompISIN	Ownership	Plant capacity	Plant capacity	Age	Reinvestment year	Reinvestment year	Reinvestment year	Coal capacity factor 2020	Gas capacity factor 2020	Oil capacity factor 2020	Coal capacity factor 2021	Gas capacity factor 2021	Oil capacity factor 2021	Coal capacity factor 2022	Gas capacity factor 2022	Oil capacity factor 2022	Coal capacity factor 2022	Gas capacity factor 2022	Oil capacity factor 2022
[truncated: 81 more rows]
[truncated: 28 more columns]
