# Supplementary material for: Assessing corporate transition plans using a production asset-based planning approach
Source: Research Square preprint supplement (doi:10.21203/rs.3.rs-5245457/v1), 2024-12-09
Supplement: Supplementary file 24 [file 6 Engie.xlsx]

## Sheet: Engie_all
Type	Country/area	Region	Subregion	Plant / Project name	Unit / Phase name	Plant / Project name (local)	Plant / Project name (other)	Capacity (MW)	Status	Start year	Retired year	Technology	Fuel	Country/area 1 (hydropower only)	Country/area 2 (hydropower only)	Country/area 1 Capacity (MW) (hydropower only)	Country/area 2 Capacity (MW) (hydropower only)	Owner	Parent	Latitude	Longitude	Location accuracy	City	Local area (taluk, county)	Major area (prefecture, district)	Subnational unit (state, province)	GEM.Wiki URL	GEM location ID	GEM unit/phase ID	CompISIN	Ownership	Plant capacity	Plant capacity	Age	Reinvestment year	Reinvestment year	Reinvestment year
coal	Türkiye	Asia	Western Asia	Ada Yumurtalık power station	Unit 1	Ada Termik Santrali		660	cancelled			unknown	bituminous					Suez Guney Enerji Üretim [100%]	ENGIE SA [90.0%]; Mimag Enerji [10.0%]	36.843	35.86	approximate		Gölovası	Yumurtalık	Adana	https://www.gem.wiki/Ada_Yumurtal%C4%B1k_power_station	L100000103588	G100000100023	FR0010208488	0.9	1320		-99	40	80	120
coal	Türkiye	Asia	Western Asia	Ada Yumurtalık power station	Unit 2	Ada Termik Santrali		660	cancelled			unknown	bituminous					Suez Guney Enerji Üretim [100%]	ENGIE SA [90.0%]; Mimag Enerji [10.0%]	36.843	35.86	approximate		Gölovası	Yumurtalık	Adana	https://www.gem.wiki/Ada_Yumurtal%C4%B1k_power_station	L100000103588	G100000100024	FR0010208488	0.9	1320	1320	-99	40	80	120
coal	Belgium	Europe	Western Europe	Amercoeur power station	Unit 1A			125	retired	1968	2009	unknown	anthracite					Electrabel [100%]	ENGIE SA [100.0%]	50.4304	4.3955	exact	Roux			Hainaut	https://www.gem.wiki/Amercoeur_power_station	L100000100087	G100000100158	FR0010208488	1	1023		56	2008	2048	2088
coal	Belgium	Europe	Western Europe	Amercoeur power station	Unit 2			127	retired	1968	2009	unknown	anthracite					Electrabel [100%]	ENGIE SA [100.0%]	50.4304	4.3955	exact	Roux			Hainaut	https://www.gem.wiki/Amercoeur_power_station	L100000100087	G100000100159	FR0010208488	1	1023	1023	56	2008	2048	2088
coal	Chile	Americas	Latin America and the Caribbean	Andina-Hornitos power station	Unit 1	Termoeléctrica Andina-Hornitos	Andina power station (Unit 1), Central Termoeléctrica Andina (CTA) (Unit 1), Central Termoeléctrica Hornitos (CTH) (Unit 2), Hornitos power station (Unit 2)	177	operating	2011	2025	CFB	bituminous					ENGIE Energía Chile [100%]	ENGIE Energía Chile [100.0%]	-23.0877	-70.4075	exact	Mejillones			Antofagasta Region	https://www.gem.wiki/Andina-Hornitos_power_station	L100000100181	G100000100194	FR0010208488	1	355		13	2051	2091	2131
coal	Chile	Americas	Latin America and the Caribbean	Andina-Hornitos power station	Unit 2	Termoeléctrica Andina-Hornitos	Andina power station (Unit 1), Central Termoeléctrica Andina (CTA) (Unit 1), Central Termoeléctrica Hornitos (CTH) (Unit 2), Hornitos power station (Unit 2)	178	operating	2012	2025	CFB	bituminous					ENGIE Energía Chile [100%]	ENGIE Energía Chile [100.0%]	-23.0877	-70.4075	exact	Mejillones			Antofagasta Region	https://www.gem.wiki/Andina-Hornitos_power_station	L100000100181	G100000100195	FR0010208488	1	355	355	12	2052	2092	2132
coal	Belgium	Europe	Western Europe	Awirs power station	Unit 4		Les Awirs	125	retired	1967	2006	subcritical	unknown					ENGIE [100%]	ENGIE [100.0%]	50.5851	5.418	exact	Quai du Halage			Leige	https://www.gem.wiki/Awirs_power_station	L100000100090	G100000113447	FR0010208488	1	425		57	2007	2047	2087
coal	Belgium	Europe	Western Europe	Awirs power station	Unit 5		Les Awirs	300	retired	1973	2013	subcritical	unknown					Electrabel [100%]	ENGIE SA [100.0%]	50.5851	5.418	exact	Quai du Halage			Leige	https://www.gem.wiki/Awirs_power_station	L100000100090	G100000100362	FR0010208488	1	425	425	51	2013	2053	2093
coal	Chile	Americas	Latin America and the Caribbean	Barrancones power station	Unit 1	Central Termoeléctrica Barrancones		180	cancelled			subcritical	bituminous					ENGIE [100%]	ENGIE [100.0%]	-29.5	-71.2667	approximate	La Higuera			IV Region	https://www.gem.wiki/Barrancones_power_station	L100000100190	G100000100638	FR0010208488	1	540		-99	40	80	120
coal	Chile	Americas	Latin America and the Caribbean	Barrancones power station	Unit 2	Central Termoeléctrica Barrancones		180	cancelled			subcritical	bituminous					ENGIE [100%]	ENGIE [100.0%]	-29.5	-71.2667	approximate	La Higuera			IV Region	https://www.gem.wiki/Barrancones_power_station	L100000100190	G100000100639	FR0010208488	1	540		-99	40	80	120
coal	Chile	Americas	Latin America and the Caribbean	Barrancones power station	Unit 3	Central Termoeléctrica Barrancones		180	cancelled			subcritical	bituminous					ENGIE [100%]	ENGIE [100.0%]	-29.5	-71.2667	approximate	La Higuera			VI Region	https://www.gem.wiki/Barrancones_power_station	L100000100190	G100000100640	FR0010208488	1	540	540	-99	40	80	120
coal	Germany	Europe	Western Europe	Brunsbuettel GDF Suez power station	Unit 1		Brunsbuettel Electrabel	800	cancelled	2010		supercritical	bituminous					ENGIE Deutschland [100%]	ENGIE SA [100.0%]	53.8934	9.17436	exact	Brunsbuettel			Schleswig-Holstein	https://www.gem.wiki/Brunsbuettel_GDF_Suez_power_station	L100000101990	G100000101073	FR0010208488	1	800	800	14	2050	2090	2130
coal	Belgium	Europe	Western Europe	Farciennes power station	Unit 1			92	retired	1958	2010	subcritical	anthracite					Electrabel [100%]	ENGIE SA [100.0%]	50.42	4.556	exact	Farciennes			Hainaut	https://www.gem.wiki/Farciennes_power_station	L100000100088	G100000113448	FR0010208488	1	202		66	1998	2038	2078
coal	Belgium	Europe	Western Europe	Farciennes power station	Unit 2			110	retired	1958	2010	subcritical	anthracite					Electrabel [100%]	ENGIE SA [100.0%]	50.42	4.556	exact	Farciennes			Hainaut	https://www.gem.wiki/Farciennes_power_station	L100000100088	G100000113449	FR0010208488	1	202	202	66	1998	2038	2078
coal	Netherlands	Europe	Western Europe	Gelderland power station	Unit 13			632	retired	1982	2015	subcritical	bituminous					ENGIE [100%]	ENGIE [100.0%]	51.856	5.8288	exact	Nijmegen		Nijmegen	Gelderland	https://www.gem.wiki/Gelderland_power_station	L100000103087	G100000102975	FR0010208488	1	632	632	42	2022	2062	2102
coal	France	Europe	Western Europe	Goro power station	Unit 1			50	operating	2008	2025	subcritical	unknown					Prony Énergies [100%]	ENERCAL SA [75.0%]; ENGIE SA [25.0%]	-22.3302	166.912	exact	Goro	Le Mont-Dore Municipality	Sud	New Caledonia	https://www.gem.wiki/Goro_power_station	L100000104548	G100000114107	FR0010208488	0.25	100		16	2048	2088	2128
coal	France	Europe	Western Europe	Goro power station	Unit 2			50	operating	2008	2025	subcritical	unknown					Prony Énergies [100%]	ENERCAL SA [75.0%]; ENGIE SA [25.0%]	-22.3302	166.912	exact	Goro	Le Mont-Dore Municipality	Sud	New Caledonia	https://www.gem.wiki/Goro_power_station	L100000104548	G100000114108	FR0010208488	0.25	100	100	16	2048	2088	2128
coal	Peru	Americas	Latin America and the Caribbean	Ilo power station	Unit 1	Central Termoeléctrica de Ilo	Ilo 21	135	retired	1999	2022	subcritical	bituminous					ENGIE Energía Perú [100%]	ENGIE Energía Perú [100.0%]	-17.776	-71.1893	exact	Ilo	Pacocha	Ilo	Moquegua	https://www.gem.wiki/Ilo_power_station	L100000103158	G100000104832	FR0010208488	1	1560		25	2039	2079	2119
coal	Peru	Americas	Latin America and the Caribbean	Ilo power station	Unit 2	Central Termoeléctrica de Ilo	Ilo 21	135	cancelled			subcritical	unknown					ENGIE Energía Perú [100%]	ENGIE Energía Perú [100.0%]	-17.776	-71.1893	exact	Ilo	Pacocha	Ilo	Moquegua	https://www.gem.wiki/Ilo_power_station	L100000103158	G100000104833	FR0010208488	1	1560	1560	-99	40	80	120
coal	Poland	Europe	Eastern Europe	Lublin Power Station	Unit 1		Lublin Bogdanka	800	cancelled			supercritical	bituminous					ENGIE; Polska Grupa Energetyczna	ENGIE; Polska Grupa Energetyczna	51.21	22.5541	approximate	Lublin			Lubelskie	https://www.gem.wiki/Lublin_Power_Station	L100000103222	G100000106449	FR0010208488	0.5	1600		-99	40	80	120
coal	Poland	Europe	Eastern Europe	Lublin Power Station	Unit 2		Lublin Bogdanka	800	cancelled			supercritical	bituminous					ENGIE; Polska Grupa Energetyczna	ENGIE; Polska Grupa Energetyczna	51.21	22.5541	approximate	Lublin			Lubelskie	https://www.gem.wiki/Lublin_Power_Station	L100000103222	G100000106450	FR0010208488	0.5	1600	1600	-99	40	80	120
coal	Chile	Americas	Latin America and the Caribbean	Mejillones power station	Unit 1	Termoeléctrica Mejillones	Infraestructura Energética de Mejillones, IEM1 (Unit 4), IEM2 (Unit 5), Red Dragon (Unit 4, Unit 5)	160	operating	1996	2024	subcritical	bituminous					ENGIE Energía Chile [100%]	ENGIE Energía Chile [100.0%]	-23.0892	-70.4103	exact	Mejillones		Antofagasta	Antofagasta Region	https://www.gem.wiki/Mejillones_power_station	L100000100184	G100000106831	FR0010208488	1	1704		28	2036	2076	2116
coal	Chile	Americas	Latin America and the Caribbean	Mejillones power station	Unit 2	Termoeléctrica Mejillones	Infraestructura Energética de Mejillones, IEM1 (Unit 4), IEM2 (Unit 5), Red Dragon (Unit 4, Unit 5)	174	operating	1998	2024	subcritical	bituminous					ENGIE Energía Chile [100%]	ENGIE Energía Chile [100.0%]	-23.0892	-70.4103	exact	Mejillones		Antofagasta	Antofagasta Region	https://www.gem.wiki/Mejillones_power_station	L100000100184	G100000106832	FR0010208488	1	1704		26	2038	2078	2118
coal	Chile	Americas	Latin America and the Caribbean	Mejillones power station	Unit 4	Termoeléctrica Mejillones	Infraestructura Energética de Mejillones, IEM1 (Unit 4), IEM2 (Unit 5), Red Dragon (Unit 4, Unit 5)	375	operating	2019	2025	subcritical	bituminous					ENGIE Energía Chile [100%]	ENGIE Energía Chile [100.0%]	-23.0892	-70.4103	exact	Mejillones		Antofagasta	Antofagasta Region	https://www.gem.wiki/Mejillones_power_station	L100000100184	G100000106833	FR0010208488	1	1704		5	2059	2099	2139
coal	Chile	Americas	Latin America and the Caribbean	Mejillones power station	Unit 5	Termoeléctrica Mejillones	Infraestructura Energética de Mejillones, IEM1 (Unit 4), IEM2 (Unit 5), Red Dragon (Unit 4, Unit 5)	375	cancelled			subcritical	bituminous					ENGIE Energía Chile [100%]	ENGIE Energía Chile [100.0%]	-23.0892	-70.4103	exact	Mejillones		Antofagasta	Antofagasta Region	https://www.gem.wiki/Mejillones_power_station	L100000100184	G100000106834	FR0010208488	1	1704	1704	-99	40	80	120
coal	Belgium	Europe	Western Europe	Mol power station	Unit 11			124	retired	1963	2010	unknown	anthracite					Electrabel [100%]	ENGIE SA [100.0%]	51.2234	5.099	exact	Mol			Antwerp	https://www.gem.wiki/Mol_power_station	L100000100084	G100000106980	FR0010208488	1	255		61	2003	2043	2083
coal	Belgium	Europe	Western Europe	Mol power station	Unit 12			131	retired	1967	2010	unknown	anthracite					Electrabel [100%]	ENGIE SA [100.0%]	51.2234	5.099	exact	Mol			Antwerp	https://www.gem.wiki/Mol_power_station	L100000100084	G100000106981	FR0010208488	1	255	255	57	2007	2047	2087
coal	Belgium	Europe	Western Europe	Monceau-Sur-Sambre power station	Unit 1			50	retired	1949	2006	unknown	anthracite					Electrabel [100%]	ENGIE SA [100.0%]	50.4034	4.3844	exact	Charleroi			Hainaut	https://www.gem.wiki/Monceau-Sur-Sambre_power_station	L100000100089	G100000106984	FR0010208488	1	216		75	1989	2029	2069
coal	Belgium	Europe	Western Europe	Monceau-Sur-Sambre power station	Unit 2			50	retired	1949	2006	unknown	anthracite					Electrabel [100%]	ENGIE SA [100.0%]	50.4034	4.3844	exact	Charleroi			Hainaut	https://www.gem.wiki/Monceau-Sur-Sambre_power_station	L100000100089	G100000106986	FR0010208488	1	216		75	1989	2029	2069
coal	Belgium	Europe	Western Europe	Monceau-Sur-Sambre power station	Unit 10			116	retired	1964	2006	unknown	anthracite					Electrabel [100%]	ENGIE SA [100.0%]	50.4034	4.3844	exact	Charleroi			Hainaut	https://www.gem.wiki/Monceau-Sur-Sambre_power_station	L100000100089	G100000106985	FR0010208488	1	216	216	60	2004	2044	2084
coal	United States	Americas	Northern America	Mount Tom Station	Unit 1			136	retired	1960	2014	subcritical	bituminous					Firstlight Power Resources [100%]	ENGIE SA	42.2806	-72.6055	exact	Holyoke	Hampden		Massachusetts	https://www.gem.wiki/Mount_Tom_Station	L100000103970	G100000107060	FR0010208488	1	136	136	64	2000	2040	2080
coal	Portugal	Europe	Southern Europe	Pego power station	Unit 1			341	retired	1992	2021	subcritical	bituminous					Tejo Energia [100%]	Endesa SA [43.8%]; ENGIE SA [28.1%]; Marubeni Corp [28.1%]	39.4682	-8.10923	exact	Pego	Abrantes	Médio Tejo	Santarém	https://www.gem.wiki/Pego_power_station	L100000103283	G100000107913	FR0010208488	0.281	682		32	2032	2072	2112
coal	Portugal	Europe	Southern Europe	Pego power station	Unit 2			341	retired	1995	2021	subcritical	bituminous					Tejo Energia [100%]	Endesa SA [43.8%]; ENGIE SA [28.1%]; Marubeni Corp [28.1%]	39.4682	-8.10923	exact	Pego	Abrantes	Médio Tejo	Santarém	https://www.gem.wiki/Pego_power_station	L100000103283	G100000107914	FR0010208488	0.281	682	682	29	2035	2075	2115
coal	Belgium	Europe	Western Europe	Rodenhuize power station	Unit 1			133	retired	1964	2001	subcritical	unknown					ENGIE [100%]	ENGIE [100.0%]	51.1303	3.75906	exact	Desteldonk		Gent	East Flanders	https://www.gem.wiki/Rodenhuize_power_station	L100000104712	G100000114630	FR0010208488	1	133	133	60	2004	2044	2084
coal	United Kingdom	Europe	Northern Europe	Rugeley power station	Unit B1		Rugeley-B power station	547	retired	1972	2016	subcritical	bituminous					ENGIE; Mitsui & Co	ENGIE; Mitsui & Co	52.7574	-1.91998	exact	Rugeley	Cannock Chase	Staffordshire	England	https://www.gem.wiki/Rugeley_power_station	L100000103761	G100000108655	FR0010208488	0.5	1094		52	2012	2052	2092
coal	United Kingdom	Europe	Northern Europe	Rugeley power station	Unit B2		Rugeley-B power station	547	retired	1972	2016	subcritical	bituminous					ENGIE; Mitsui & Co	ENGIE; Mitsui & Co	52.7574	-1.91998	exact	Rugeley	Cannock Chase	Staffordshire	England	https://www.gem.wiki/Rugeley_power_station	L100000103761	G100000108656	FR0010208488	0.5	1094	1094	52	2012	2052	2092
coal	Belgium	Europe	Western Europe	Ruien power station	Unit 3			130	retired	1966	2012	subcritical	bituminous					Electrabel [100%]	ENGIE SA [100.0%]	50.7834	3.48839	exact	Kluisbergen		Kluisbergen	East Flanders	https://www.gem.wiki/Ruien_power_station	L100000100086	G100000108657	FR0010208488	1	550		58	2006	2046	2086
coal	Belgium	Europe	Western Europe	Ruien power station	Unit 4			130	retired	1967	2012	subcritical	bituminous					Electrabel [100%]	ENGIE SA [100.0%]	50.7834	3.48839	exact	Kluisbergen		Kluisbergen	East Flanders	https://www.gem.wiki/Ruien_power_station	L100000100086	G100000108658	FR0010208488	1	550		57	2007	2047	2087
coal	Belgium	Europe	Western Europe	Ruien power station	Unit 5			290	retired	1973	2013	subcritical	bituminous					Electrabel [100%]	ENGIE SA [100.0%]	50.7834	3.48839	exact	Kluisbergen		Kluisbergen	East Flanders	https://www.gem.wiki/Ruien_power_station	L100000100086	G100000108659	FR0010208488	1	550	550	51	2013	2053	2093
coal	Morocco	Africa	Northern Africa	Safi power station	Unit 1			693	operating	2018		ultra-supercritical	unknown					Safi Energy Company [100%]	ENGIE SA [35.0%]; Nareva Holding SA [35.0%]; Mitsui & Co Ltd [30.0%]	32.1491	-9.28229	exact	Cap Ghir Safi			Souss-Massa	https://www.gem.wiki/Safi_power_station	L100000103053	G100000108700	FR0010208488	0.35	1386		6	2058	2098	2138
coal	Morocco	Africa	Northern Africa	Safi power station	Unit 2			693	operating	2018		ultra-supercritical	unknown					Safi Energy Company [100%]	ENGIE SA [35.0%]; Nareva Holding SA [35.0%]; Mitsui & Co Ltd [30.0%]	32.1491	-9.28229	exact	Cap Ghir Safi			Souss-Massa	https://www.gem.wiki/Safi_power_station	L100000103053	G100000108701	FR0010208488	0.35	1386	1386	6	2058	2098	2138
coal	Belgium	Europe	Western Europe	Schelle power station	Unit 31			136	retired	1966	2000	subcritical	unknown					Electrabel [100%]	ENGIE SA [100.0%]	51.1233	4.27278	approximate	Schelle			Antwerp	https://www.gem.wiki/Schelle_power_station	L100000104713	G100000114631	FR0010208488	1	272		58	2006	2046	2086
coal	Belgium	Europe	Western Europe	Schelle power station	Unit 32			136	retired	1966	2000	subcritical	unknown					Electrabel [100%]	ENGIE SA [100.0%]	51.1233	4.27278	approximate	Schelle			Antwerp	https://www.gem.wiki/Schelle_power_station	L100000104713	G100000114632	FR0010208488	1	272	272	58	2006	2046	2086
coal	Germany	Europe	Western Europe	Stade GDF Suez power station	--		Stade Electrabel	830	cancelled	2010		supercritical	bituminous					ENGIE Deutschland [100%]	ENGIE SA [100.0%]	53.6	9.48333	exact	Stade			Lower Saxony	https://www.gem.wiki/Stade_GDF_Suez_power_station	L100000101916	G100000109590	FR0010208488	1	830	830	14	2050	2090	2130
coal	Portugal	Europe	Southern Europe	Tapada do Outeiro power station	Unit 2			50	retired	1964	2000	subcritical	unknown					TrustEnergy [100%]	ENGIE SA [50.0%]; Marubeni Corp [50.0%]	41.07	-8.4587	exact	Medas			Porto	https://www.gem.wiki/Tapada_do_Outeiro_power_station	L100000400593	G100000114668	FR0010208488	0.5	1040	1040	60	2004	2044	2084
coal	Chile	Americas	Latin America and the Caribbean	Tocopilla power station	Unit 12	Termoeléctrica Tocopilla		87	retired	1983	2019	subcritical	subbituminous					ENGIE Energía Chile [100%]	ENGIE Energía Chile [100.0%]	-22.0964	-70.2118	exact	Tocopilla		Tocopilla	Antofagasta Region	https://www.gem.wiki/Tocopilla_power_station	L100000100186	G100000110209	FR0010208488	1	835		41	2023	2063	2103
coal	Chile	Americas	Latin America and the Caribbean	Tocopilla power station	Unit 13	Termoeléctrica Tocopilla		86	retired	1985	2019	subcritical	subbituminous					ENGIE Energía Chile [100%]	ENGIE Energía Chile [100.0%]	-22.0964	-70.2118	exact	Tocopilla		Tocopilla	Antofagasta Region	https://www.gem.wiki/Tocopilla_power_station	L100000100186	G100000110210	FR0010208488	1	835		39	2025	2065	2105
coal	Chile	Americas	Latin America and the Caribbean	Tocopilla power station	Unit 14	Termoeléctrica Tocopilla		136	retired	1987	2022	subcritical	subbituminous					ENGIE Energía Chile [100%]	ENGIE Energía Chile [100.0%]	-22.0964	-70.2118	exact	Tocopilla		Tocopilla	Antofagasta Region	https://www.gem.wiki/Tocopilla_power_station	L100000100186	G100000110211	FR0010208488	1	835		37	2027	2067	2107
coal	Chile	Americas	Latin America and the Caribbean	Tocopilla power station	Unit 15	Termoeléctrica Tocopilla		132	retired	1990	2022	subcritical	subbituminous					ENGIE Energía Chile [100%]	ENGIE Energía Chile [100.0%]	-22.0964	-70.2118	exact	Tocopilla		Tocopilla	Antofagasta Region	https://www.gem.wiki/Tocopilla_power_station	L100000100186	G100000110212	FR0010208488	1	835	835	34	2030	2070	2110
coal	United States	Americas	Northern America	Trigen Syracuse Plant	Unit 1		Syracuse Energy power station	90.6	retired	1991	2013	subcritical	bituminous					GDF Suez Energy Generation NA [100%]	ENGIE SA	43.0654	-76.2083	exact	Solvay	Onondaga		New York	https://www.gem.wiki/Trigen_Syracuse_Plant	L100000104070	G100000110316	FR0010208488	1	90.6	90.6	33	2031	2071	2111
coal	Italy	Europe	Southern Europe	Vado Ligure power station	Unit 1			320	retired	1970	2016	subcritical	bituminous					Tirreno Power [100%]	Energia Italiana SpA [50.0%]; ENGIE SA [50.0%]	44.2755	8.4305	exact	Vado Ligure			Savona	https://www.gem.wiki/Vado_Ligure_power_station	L100000102858	G100000114669	FR0010208488	0.5	3140		54	2010	2050	2090
coal	Italy	Europe	Southern Europe	Vado Ligure power station	Unit 3			330	retired	1970	2016	subcritical	bituminous					Tirreno Power [100%]	Energia Italiana SpA [50.0%]; ENGIE SA [50.0%]	44.2755	8.4305	exact	Vado Ligure			Savona	https://www.gem.wiki/Vado_Ligure_power_station	L100000102858	G100000110536	FR0010208488	0.5	3140		54	2010	2050	2090
coal	Italy	Europe	Southern Europe	Vado Ligure power station	Unit 4			330	retired	1971	2016	subcritical	bituminous					Tirreno Power [100%]	Energia Italiana SpA [50.0%]; ENGIE SA [50.0%]	44.2755	8.4305	exact	Vado Ligure			Savona	https://www.gem.wiki/Vado_Ligure_power_station	L100000102858	G100000110537	FR0010208488	0.5	3140		53	2011	2051	2091
coal	Italy	Europe	Southern Europe	Vado Ligure power station	Unit VL6			460	cancelled	2017		ultra-supercritical	bituminous					Tirreno Power [100%]	Energia Italiana SpA [50.0%]; ENGIE SA [50.0%]	44.2755	8.4305	exact	Vado Ligure			Savona	https://www.gem.wiki/Vado_Ligure_power_station	L100000102858	G100000110535	FR0010208488	0.5	3140	3140	7	2057	2097	2137
geothermal	Indonesia	Asia	South-eastern Asia	Muarah Laboh geothermal plant	1		Muara Laboh	85	operating	2019		flash steam - double						Sumitomo CORP [18%]; ENGIE [18%]; PT Supreme Energy [30%]; INPEX Corp [33%]		-1.6268	101.13	exact		Pauh Duo		West Sumatra	https://gem.wiki/Muarah_Laboh_geothermal_plant	L100000700113	G100000700188	FR0010208488	0.18	160		5	2059	2099	2139
geothermal	Indonesia	Asia	South-eastern Asia	Muarah Laboh geothermal plant	2		Muara Laboh	75	construction			unknown type						Sumitomo CORP [18%]; ENGIE [18%]; PT Supreme Energy [30%]; INPEX Corp [33%]		-1.6268	101.13	exact		Pauh Duo		West Sumatra	https://gem.wiki/Muarah_Laboh_geothermal_plant	L100000700113	G100000700189	FR0010208488	0.18	160	160	-99	40	80	120
geothermal	Indonesia	Asia	South-eastern Asia	Rajabasa geothermal power plant	1			110	construction	2025		unknown type						ENGIE [33%]; PT Supreme Energy [33%]; Sumitomo Corp [33%]		-5.7817	105.626	approximate		Gunung Rajabasa	South Lampung Regency	Lampung Province	https://gem.wiki/Rajabasa_geothermal_power_plant	L100000700144	G100000700237	FR0010208488	0.33	220		-1	2065	2105	2145
geothermal	Indonesia	Asia	South-eastern Asia	Rajabasa geothermal power plant	2			110	construction	2025		unknown type						ENGIE [33%]; PT Supreme Energy [33%]; Sumitomo Corp [33%]		-5.7817	105.626	approximate		Gunung Rajabasa	South Lampung Regency	Lampung Province	https://gem.wiki/Rajabasa_geothermal_power_plant	L100000700144	G100000700238	FR0010208488	0.33	220	220	-1	2065	2105	2145
geothermal	Indonesia	Asia	South-eastern Asia	Rantau Dedep geothermal power plant	1			91	operating	2021		unknown type						Tohoku Electric Power CO INC [10%]; PT Supreme Energy [25%]; Marubeni CORP [27%]; ENGIE [37%]		-4.2069	103.386	exact	Swarna Dwipa	Muara Enim		South Sumatra	https://gem.wiki/Rantau_Dedep_geothermal_power_plant	L100000700146	G100000700240	FR0010208488	0.37	91	91	3	2061	2101	2141
hydropower	Portugal	Europe	Southern Europe	Baixo Sabor Montante hydroelectric plant				153	operating	2016		pumped storage				TRUE	FALSE	ENGIE [40%]; Crédit Agricole Assurances [35%]; Mirova [25%]		41.2279	-7.0146	exact		Bragança			https://gem.wiki/Baixo_Sabor_Montante_hydroelectric_plant	L603190	G603225	FR0010208488	0.4	153	153	8	2056	2096	2136
hydropower	Portugal	Europe	Southern Europe	Bemposta hydroelectric plant				240	operating	1964		run-of-river				TRUE	FALSE	ENGIE [40%]; Crédit Agricole Assurances [35%]; Mirova [25%]		41.3011	-6.4697	exact		Bragança			https://gem.wiki/Bemposta_hydroelectric_plant	L603192	G603227	FR0010208488	0.4	240	240	60	2004	2044	2084
hydropower	Portugal	Europe	Southern Europe	Bemposta II hydroelectric plant				203	operating	2011		run-of-river				TRUE	FALSE	ENGIE [40%]; Crédit Agricole Assurances [35%]; Mirova [25%]		41.3007	-6.4698	exact			Zamora	Castile and León	https://gem.wiki/Bemposta_II_hydroelectric_plant	L603193	G603228	FR0010208488	0.4	203	203	13	2051	2091	2131
hydropower	Belgium	Europe	Western Europe	Coo I hydroelectric plant				474	operating	1972		pumped storage				TRUE	FALSE	ENGIE		50.3846	5.8616	exact		Verviers		Liège	https://gem.wiki/Coo_I_hydroelectric_plant	L600149	G600149	FR0010208488	1	474	474	52	2012	2052	2092
hydropower	Belgium	Europe	Western Europe	Coo II hydroelectric plant				690	operating	1972		pumped storage				TRUE	FALSE	ENGIE		50.3846	5.8616	exact		Verviers		Liège	https://gem.wiki/Coo_II_hydroelectric_plant	L600150	G600150	FR0010208488	1	690	690	52	2012	2052	2092
hydropower	United Kingdom	Europe	Northern Europe	Dinorwig hydroelectric plant				2016	operating	1984		run-of-river				TRUE	FALSE	ENGIE		53.1206	-4.1153	exact		Gwynedd		Wales	https://gem.wiki/Dinorwig_hydroelectric_plant	L603700	G603738	FR0010208488	1	2016	2016	40	2024	2064	2104
hydropower	United Kingdom	Europe	Northern Europe	Ffestiniog hydroelectric plant				384	operating	1963		run-of-river				TRUE	FALSE	ENGIE		52.9808	-3.9686	exact		Gwynedd		Wales	https://gem.wiki/Ffestiniog_hydroelectric_plant	L603704	G603742	FR0010208488	1	384	384	61	2003	2043	2083
hydropower	Portugal	Europe	Southern Europe	Foz Tua hydroelectric plant				268	operating	2017		pumped storage				TRUE	FALSE	ENGIE [40%]; Crédit Agricole Assurances [35%]; Mirova [25%]		41.2188	-7.4229	exact		Vila Real			https://gem.wiki/Foz_Tua_hydroelectric_plant	L603199	G603234	FR0010208488	0.4	268	268	7	2057	2097	2137
hydropower	France	Europe	Western Europe	Maregès hydroelectric plant				146	operating	1935		run-of-river				TRUE	FALSE	ENGIE		45.3917	2.3646	exact		Corrèze		Nouvelle-Aquitaine	https://gem.wiki/Maregès_hydroelectric_plant	L601656	G601675	FR0010208488	1	146	146	89	1975	2015	2055
hydropower	Portugal	Europe	Southern Europe	Miranda Douro hydroelectric plant			Miranda	180	operating	1960		run-of-river				TRUE	FALSE	ENGIE [40%]; Crédit Agricole Assurances [35%]; Mirova [25%]		41.4898	-6.2639	exact	Miranda do Douro	Bragança			https://gem.wiki/Miranda_Douro_hydroelectric_plant	L603202	G603237	FR0010208488	0.4	180	180	64	2000	2040	2080
hydropower	Portugal	Europe	Southern Europe	Miranda II hydroelectric plant				189	operating	1995		run-of-river				TRUE	FALSE	ENGIE [40%]; Crédit Agricole Assurances [35%]; Mirova [25%]		41.4889	-6.2639	exact	Miranda do Douro	Bragança			https://gem.wiki/Miranda_II_hydroelectric_plant	L603203	G603238	FR0010208488	0.4	189	189	29	2035	2075	2115
hydropower	Portugal	Europe	Southern Europe	Picote hydroelectric plant				195	operating	1958		run-of-river				TRUE	FALSE	ENGIE [40%]; Crédit Agricole Assurances [35%]; Mirova [25%]		41.3783	-6.3516	exact	Miranda do Douro	Bragança			https://gem.wiki/Picote_hydroelectric_plant	L604096	G604135	FR0010208488	0.4	195	195	66	1998	2038	2078
hydropower	Portugal	Europe	Southern Europe	Picote II hydroelectric plant				245	operating	2011		run-of-river				TRUE	FALSE	ENGIE [40%]; Crédit Agricole Assurances [35%]; Mirova [25%]		41.3783	-6.3516	exact	Miranda do Douro	Bragança			https://gem.wiki/Picote_II_hydroelectric_plant	L604097	G604136	FR0010208488	0.4	245	245	13	2051	2091	2131
hydropower	Peru	Americas	Latin America and the Caribbean	Quitarasca hydroelectric plant		Central Hidroeléctrica Quitarasca		114	operating	2016		run-of-river				TRUE	FALSE	ENGIE Energía Perú SA		-9.5001	-77.7501	approximate			Quitarasca	Ancash	https://gem.wiki/Quitarasca_hydroelectric_plant	L603114	G603149	FR0010208488	1	114	114	8	2056	2096	2136
hydropower	Germany	Europe	Western Europe	Reisach hydroelectric plant				107	operating	1955		pumped storage				TRUE	FALSE	ENGIE		49.5302	12.2846	exact		Landkreis Schwandorf		Bavaria	https://gem.wiki/Reisach_hydroelectric_plant	L601736	G601755	FR0010208488	1	107	107	69	1995	2035	2075
hydropower	France	Europe	Western Europe	Saint Pierre hydroelectric plant			St Pierre de Marèges	122	operating			run-of-river				TRUE	FALSE	ENGIE		45.3906	2.3663	exact		Corrèze		Nouvelle-Aquitaine	https://gem.wiki/Saint_Pierre_hydroelectric_plant	L601678	G601697	FR0010208488	1	122	122	-99	40	80	120
hydropower	Peru	Americas	Latin America and the Caribbean	Yucán hydroelectric plant		Central Hidroeléctrica Yucán		130	operating	2005		conventional storage				TRUE	FALSE	ENGIE		-10.7222	-75.6441	exact				Pasco	https://gem.wiki/Yucán_hydroelectric_plant	L603133	G603168	FR0010208488	1	130	130	19	2045	2085	2125
oil/gas	Belgium	Europe	Western Europe	Aalst Syral power station	1			48	operating	2000		CC	NG					Electrabel NV/SA [100%]	ENGIE SA [100.0%]	50.9355	4.04516	exact	Aalst			East Flanders	https://www.gem.wiki/Aalst_Syral_power_station	L100000400016	G100000400016	FR0010208488	1	48	48	24	2040	2080	2120
oil/gas	Bahrain	Asia	Western Asia	Al Ezzel power station	CC1	محطة العزل لإنتاج الكهرباء	El Ezzel CCGT Power Plant Bahrain	471	operating	2007		CC	NG					Al Ezzel Power Company BSC [100.0%]	ENGIE SA [45.0%]; Gulf Investment Corp [45.0%]; Social Insurance Organization (Bahrain)	26.2175	50.6595	exact	Al Hidd			Muharraq	https://www.gem.wiki/Al_Ezzel_power_station	L100000405455	G100000404587	FR0010208488	0.45	942		17	2047	2087	2127
oil/gas	Bahrain	Asia	Western Asia	Al Ezzel power station	CC2	محطة العزل لإنتاج الكهرباء	El Ezzel CCGT Power Plant Bahrain	471	operating	2007		CC	NG					Al Ezzel Power Company BSC [100.0%]	ENGIE SA [45.0%]; Gulf Investment Corp [45.0%]; Social Insurance Organization (Bahrain)	26.2175	50.6595	exact	Al Hidd			Muharraq	https://www.gem.wiki/Al_Ezzel_power_station	L100000405455	G100000404588	FR0010208488	0.45	942	942	17	2047	2087	2127
oil/gas	Bahrain	Asia	Western Asia	Al Hidd Power and Water Station	1	محطة الحد لإنتاج الكهرباء	Al Hidd power plant/Al-Hidd IWPP	987	operating	2003		CC	NG					Hidd Power Company BSC [100.0%]	Malakoff Corporation Bhd [40.0%]; ENGIE SA [30.0%]; Sumitomo Corp [30.0%]	26.2223	50.6621	exact	Al Hidd			Muharraq	https://www.gem.wiki/Al_Hidd_Power_and_Water_Station	L100000405457	G100000404589	FR0010208488	0.3	987	987	21	2043	2083	2123
oil/gas	Belgium	Europe	Western Europe	Amercoeur power station	1			451	operating	2010		CC	NG					Electrabel NV/SA [100%]	ENGIE SA [100.0%]	50.4304	4.3955	exact	Roux			Hainaut	https://www.gem.wiki/Amercoeur_power_station	L100000100087	G100000400017	FR0010208488	1	1023		14	2050	2090	2130
oil/gas	Belgium	Europe	Western Europe	Amercoeur power station	2			320	shelved	2025		GT	NG					Electrabel NV/SA [100%]	ENGIE SA [100.0%]	50.4304	4.3955	exact	Roux			Hainaut	https://www.gem.wiki/Amercoeur_power_station	L100000100087	G100000406282	FR0010208488	1	1023	1023	-1	2065	2105	2145
oil/gas	Italy	Europe	Southern Europe	Arkema Marghera power station	1			20	operating	2013		ST	NG					Engie Servizi SpA [100.0%]	ENGIE SA [100.0%]	45.4502	12.2259	exact	Porto Marghera			Venice	https://www.gem.wiki/Arkema_Marghera_power_station	L100000400343	G100000400343	FR0010208488	1	20	20	11	2053	2093	2133
oil/gas	United States	Americas	Northern America	Astoria Energy II power station	CC1			650	operating	2011		CC	NG/FO					Astoria Energy II LLC [100.0%]	Algemene Pensioen Groep NV; Bank HaPoalim; Clal Insurance Enterprises Holdings Ltd; ENGIE SA; Harbert-managed funds; IDB Development Group; Munich RE Co; SNC-Lavalin; other	40.7813	-73.8966	exact	Astoria	Queens		New York	https://www.gem.wiki/Astoria_Energy_II_power_station	L100000401729	G100000402047	FR0010208488	0.111111	650	650	13	2051	2091	2131
oil/gas	South Africa	Africa	Sub-Saharan Africa	Avon power station	1			167.5	operating	2016		GT	NG/D					Avon Peaking Power (RF) Pty Ltd [100.0%]	ENGIE SA [38.0%]; Legend Power Solutions Pty Ltd [27.0%]; Mitsui & Co Ltd [25.0%]; The Peaker Trust [10.0%]	-29.4189	31.1577	exact	Ballito			KwaZulu-Natal	https://www.gem.wiki/Avon_power_station	L100000407110	G100000408559	FR0010208488	0.38	670		8	2056	2096	2136
oil/gas	South Africa	Africa	Sub-Saharan Africa	Avon power station	2			167.5	operating	2016		GT	NG/D					Avon Peaking Power (RF) Pty Ltd [100.0%]	ENGIE SA [38.0%]; Legend Power Solutions Pty Ltd [27.0%]; Mitsui & Co Ltd [25.0%]; The Peaker Trust [10.0%]	-29.4189	31.1577	exact	Ballito			KwaZulu-Natal	https://www.gem.wiki/Avon_power_station	L100000407110	G100000414451	FR0010208488	0.38	670		8	2056	2096	2136
oil/gas	South Africa	Africa	Sub-Saharan Africa	Avon power station	3			167.5	operating	2016		GT	NG/D					Avon Peaking Power (RF) Pty Ltd [100.0%]	ENGIE SA [38.0%]; Legend Power Solutions Pty Ltd [27.0%]; Mitsui & Co Ltd [25.0%]; The Peaker Trust [10.0%]	-29.4189	31.1577	exact	Ballito			KwaZulu-Natal	https://www.gem.wiki/Avon_power_station	L100000407110	G100000414450	FR0010208488	0.38	670		8	2056	2096	2136
oil/gas	South Africa	Africa	Sub-Saharan Africa	Avon power station	4			167.5	operating	2016		GT	NG/D					Avon Peaking Power (RF) Pty Ltd [100.0%]	ENGIE SA [38.0%]; Legend Power Solutions Pty Ltd [27.0%]; Mitsui & Co Ltd [25.0%]; The Peaker Trust [10.0%]	-29.4189	31.1577	exact	Ballito			KwaZulu-Natal	https://www.gem.wiki/Avon_power_station	L100000407110	G100000414449	FR0010208488	0.38	670	670	8	2056	2096	2136
oil/gas	Germany	Europe	Western Europe	Barmen power station	GT1		Wuppertal-Barmen	34	mothballed	1978		GT	NG/HFO					WSW Energie & Wasser AG [100.0%]	WSW Wuppertaler Stadtwerke GmbH [66.9%]; ENGIE SA [33.1%]	51.2689	7.2003	exact	Wuppertal			Nordrhein-Westfalen	https://www.gem.wiki/Barmen_power_station	L100000400114	G100000412908	FR0010208488	0.331	156		46	2018	2058	2098
oil/gas	Germany	Europe	Western Europe	Barmen power station	GT2		Wuppertal-Barmen	34	mothballed	1978		GT	NG/HFO					WSW Energie & Wasser AG [100.0%]	WSW Wuppertaler Stadtwerke GmbH [66.9%]; ENGIE SA [33.1%]	51.2689	7.2003	exact	Wuppertal			Nordrhein-Westfalen	https://www.gem.wiki/Barmen_power_station	L100000400114	G100000412907	FR0010208488	0.331	156		46	2018	2058	2098
oil/gas	Germany	Europe	Western Europe	Barmen power station	CC1		Wuppertal-Barmen	88	operating	2005		CC	NG					WSW Energie & Wasser AG [100.0%]	WSW Wuppertaler Stadtwerke GmbH [66.9%]; ENGIE SA [33.1%]	51.2689	7.2003	exact	Wuppertal			Nordrhein-Westfalen	https://www.gem.wiki/Barmen_power_station	L100000400114	G100000400114	FR0010208488	0.331	156	156	19	2045	2085	2125
oil/gas	Belgium	Europe	Western Europe	Beerse power station	IC			33	operating			ICCC	HFO					Electrabel NV/SA	ENGIE SA	51.3261	4.853	exact					https://www.gem.wiki/Beerse_power_station	L100001000036	G100001000101	FR0010208488	1	33	33	-99	40	80	120
oil/gas	Netherlands	Europe	Western Europe	Bergum power station	10GT			72	operating	2019		GT	NG					Engie Energie Nederland NV [100%]	ENGIE SA [100.0%]	53.2097	6.02959	exact	Bergum			Friesland	https://www.gem.wiki/Bergum_power_station	L100000400499	G100000409942	FR0010208488	1	808		5	2059	2099	2139
oil/gas	Netherlands	Europe	Western Europe	Bergum power station	20GT			72	operating	2019		GT	NG					Engie Energie Nederland NV [100%]	ENGIE SA [100.0%]	53.2097	6.02959	exact	Bergum			Friesland	https://www.gem.wiki/Bergum_power_station	L100000400499	G100000409941	FR0010208488	1	808		5	2059	2099	2139
oil/gas	Netherlands	Europe	Western Europe	Bergum power station	10			332	mothballed			CC	NG					Engie Energie Nederland NV [100%]	ENGIE SA [100.0%]	53.2097	6.02959	exact	Bergum			Friesland	https://www.gem.wiki/Bergum_power_station	L100000400499	G100000400499	FR0010208488	1	808		-99	40	80	120
oil/gas	Netherlands	Europe	Western Europe	Bergum power station	20			332	mothballed			CC	NG					Engie Energie Nederland NV [100%]	ENGIE SA [100.0%]	53.2097	6.02959	exact	Bergum			Friesland	https://www.gem.wiki/Bergum_power_station	L100000400499	G100000400500	FR0010208488	1	808	808	-99	40	80	120
oil/gas	Belgium	Europe	Western Europe	Beveren Ineos Phenolchemie power station	1			23.8	operating	1993		GT	NG					Electrabel NV/SA [100%]	ENGIE SA [100.0%]	51.2909	4.27025	exact	Beveren			East Flanders	https://www.gem.wiki/Beveren_Ineos_Phenolchemie_power_station	L100000400023	G100000400023	FR0010208488	1	23.8	23.8	31	2033	2073	2113
oil/gas	Italy	Europe	Southern Europe	Boffalora power station	1			88	operating	1988		CC	NG					Engie Servizi SpA [100.0%]	ENGIE SA [100.0%]	45.456	8.79646	approximate	Boffalora Sopra Ticino			Milan	https://www.gem.wiki/Boffalora_power_station	L100000400352	G100000400352	FR0010208488	1	88	88	36	2028	2068	2108
oil/gas	United States	Americas	Northern America	Calumet Energy Team power station	CT11			156	operating	2002		GT	NG					Engie North America [100.0%]	ENGIE SA [100.0%]	41.6835	-87.5563	exact	Chicago	Cook		Illinois	https://www.gem.wiki/Calumet_Energy_Team_power_station	L100000401565	G100000402272	FR0010208488	1	312		22	2042	2082	2122
oil/gas	United States	Americas	Northern America	Calumet Energy Team power station	CT12			156	operating	2002		GT	NG					Engie North America [100.0%]	ENGIE SA [100.0%]	41.6835	-87.5563	exact	Chicago	Cook		Illinois	https://www.gem.wiki/Calumet_Energy_Team_power_station	L100000401565	G100000402273	FR0010208488	1	312	312	22	2042	2082	2122
oil/gas	Italy	Europe	Southern Europe	Castelmassa power station	1			54	operating	1994		CC	NG					Engie Servizi SpA [100.0%]	ENGIE SA [100.0%]	45.0213	11.3116	exact	Castelmassa			Rovigo	https://www.gem.wiki/Castelmassa_power_station	L100000400364	G100000400364	FR0010208488	1	54	54	30	2034	2074	2114
oil/gas	Peru	Americas	Latin America and the Caribbean	Chilca power station	1	Central Termoeléctrica Chilca		852	operating	2012		CC	NG					ENGIE Energía Perú SA [100%]	ENGIE Energía Perú SA [100.0%]	-12.5024	-76.729	exact	Chilca		Cañete	Lima	https://gem.wiki/Chilca_power_station	L100000406603	G100000406665	FR0010208488	1	963		12	2052	2092	2132
oil/gas	Peru	Americas	Latin America and the Caribbean	Chilca power station	2	Central Termoeléctrica Chilca		111	operating	2016		CC	NG					ENGIE Energía Perú SA [100%]	ENGIE Energía Perú SA [100.0%]	-12.5024	-76.729	exact	Chilca		Cañete	Lima	https://gem.wiki/Chilca_power_station	L100000406603	G100000406666	FR0010208488	1	963	963	8	2056	2096	2136
oil/gas	France	Europe	Western Europe	Combigolfe power station	1	GRACIT01 - GROUPE 01 DE LA CENTRALE THERMIQUE DE GRACIEUSE (LA)		425	operating	2010		CC	NG					Engie Energy France [100.0%]	ENGIE SA [100.0%]	43.4072	4.8676	exact	Fos-sur-Mer			Bouches-du-Rhone	https://www.gem.wiki/Combigolfe_power_station	L100000400093	G100000400093	FR0010208488	1	425	425	14	2050	2090	2130
oil/gas	Belgium	Europe	Western Europe	Covestro Oorderen power station	1		Antwerp Bayer/Oorderen Bayer	43	operating			GT	NG					Electrabel NV/SA [100%]	ENGIE SA [100.0%]	51.297	4.31907	approximate	Antwerp			Antwerp	https://www.gem.wiki/Covestro_Oorderen_power_station	L100000406369	G100000406275	FR0010208488	1	43	43	-99	40	80	120
oil/gas	France	Europe	Western Europe	Cycofos power station	1			428	operating	2009		CC	NG					CyCoFos [100.0%]	ENGIE SA [100.0%]	43.428	4.88652	exact	Fos-sur-Mer			Bouches-du-Rhone	https://www.gem.wiki/Cycofos_power_station	L100000400095	G100000400095	FR0010208488	1	428	428	15	2049	2089	2129
oil/gas	South Africa	Africa	Sub-Saharan Africa	Dedisa power station	1			335	operating	2015		CC	NG/D					Dedisa Peaking Power (RF) Pty Ltd [100.0%]	ENGIE SA [38.0%]; Legend Power Solutions Pty Ltd [27.0%]; Mitsui & Co Ltd [25.0%]; The Peaker Trust [10.0%]	-33.7434	25.6728	exact	Gqeberha			Eastern Cape	https://www.gem.wiki/Dedisa_power_station	L100000407109	G100000408558	FR0010208488	0.38	335	335	9	2055	2095	2135
oil/gas	Chile	Americas	Latin America and the Caribbean	Diesel Tamaya (Suta) power station	1	Central Diesel Tamaya		104	retired	2009	2020	IC	D					ENGIE Energía Chile SA [100%]	ENGIE Energía Chile SA [100.0%]	-22.1637	-70.0873	exact	Tocopilla				https://gem.wiki/Diesel_Tamaya_(Suta)_power_station	L100000408564	G100000412140	FR0010208488	1	104	104	15	2049	2089	2129
oil/gas	Belgium	Europe	Western Europe	Drogenbos power station	1			460	operating	1993		CC	NG					Electrabel NV/SA [100%]	ENGIE SA [100.0%]	50.8023	4.299	exact	Drogenbos			Flemish Brabant	https://www.gem.wiki/Drogenbos_power_station	L100000400024	G100000400024	FR0010208488	1	572		31	2033	2073	2113
oil/gas	Belgium	Europe	Western Europe	Drogenbos power station	ST			112	mothballed	1999		ST	HFO					Electrabel NV/SA [100%]	ENGIE SA [100.0%]	50.8023	4.299	exact	Drogenbos			Flemish Brabant	https://www.gem.wiki/Drogenbos_power_station	L100000400024	G100001000100	FR0010208488	1	572	572	25	2039	2079	2119
oil/gas	Australia	Oceania	Australia and New Zealand	Dry Creek GT power station	1			52	operating	1973	2030	GT	NG					Synergen Power Pty Ltd [100.0%]	ENGIE SA [72.0%]; Mitsui & Co Ltd [28.0%]	-34.8475	138.577	exact	Adelaide			South Australia	https://www.gem.wiki/Dry_Creek_GT_power_station	L100000405112	G100000401509	FR0010208488	0.72	156		51	2013	2053	2093
oil/gas	Australia	Oceania	Australia and New Zealand	Dry Creek GT power station	2			52	operating	1973	2030	GT	NG					Synergen Power Pty Ltd [100.0%]	ENGIE SA [72.0%]; Mitsui & Co Ltd [28.0%]	-34.8475	138.577	exact	Adelaide			South Australia	https://www.gem.wiki/Dry_Creek_GT_power_station	L100000405112	G100000401510	FR0010208488	0.72	156		51	2013	2053	2093
oil/gas	Australia	Oceania	Australia and New Zealand	Dry Creek GT power station	3			52	operating	1973	2030	GT	NG					Synergen Power Pty Ltd [100.0%]	ENGIE SA [72.0%]; Mitsui & Co Ltd [28.0%]	-34.8475	138.577	exact	Adelaide			South Australia	https://www.gem.wiki/Dry_Creek_GT_power_station	L100000405112	G100000401511	FR0010208488	0.72	156	156	51	2013	2053	2093
oil/gas	Netherlands	Europe	Western Europe	EEM power station	EC20	Eemscentrale		131	operating	1987		GT	NG					Engie Energie Nederland NV [100%]	ENGIE SA [100.0%]	53.4417	6.85605	exact	Eemshaven			Groningen	https://www.gem.wiki/EEM_power_station	L100000400513	G100000409939	FR0010208488	1	1931		37	2027	2067	2107
oil/gas	Netherlands	Europe	Western Europe	EEM power station	EC3	Eemscentrale		360	operating	1995		CC	NG					Engie Energie Nederland NV [100%]	ENGIE SA [100.0%]	53.4417	6.85605	exact	Eemshaven			Groningen	https://www.gem.wiki/EEM_power_station	L100000400513	G100000400513	FR0010208488	1	1931		29	2035	2075	2115
oil/gas	Netherlands	Europe	Western Europe	EEM power station	EC4	Eemscentrale		360	operating	1995		CC	NG					Engie Energie Nederland NV [100%]	ENGIE SA [100.0%]	53.4417	6.85605	exact	Eemshaven			Groningen	https://www.gem.wiki/EEM_power_station	L100000400513	G100000400514	FR0010208488	1	1931		29	2035	2075	2115
oil/gas	Netherlands	Europe	Western Europe	EEM power station	EC5	Eemscentrale		360	operating	1995		CC	NG					Engie Energie Nederland NV [100%]	ENGIE SA [100.0%]	53.4417	6.85605	exact	Eemshaven			Groningen	https://www.gem.wiki/EEM_power_station	L100000400513	G100000400515	FR0010208488	1	1931		29	2035	2075	2115
oil/gas	Netherlands	Europe	Western Europe	EEM power station	EC6	Eemscentrale		360	operating	1996		CC	NG					Engie Energie Nederland NV [100%]	ENGIE SA [100.0%]	53.4417	6.85605	exact	Eemshaven			Groningen	https://www.gem.wiki/EEM_power_station	L100000400513	G100000400516	FR0010208488	1	1931		28	2036	2076	2116
oil/gas	Netherlands	Europe	Western Europe	EEM power station	EC7	Eemscentrale		360	operating	1996		CC	NG					Engie Energie Nederland NV [100%]	ENGIE SA [100.0%]	53.4417	6.85605	exact	Eemshaven			Groningen	https://www.gem.wiki/EEM_power_station	L100000400513	G100000400517	FR0010208488	1	1931	1931	28	2036	2076	2116
oil/gas	Portugal	Europe	Southern Europe	Elecgas Pego power station	G3			418	operating	2011		CC	NG					ElecGas SA [100%]	Endesa SA [50.0%]; ENGIE SA [25.0%]; Marubeni Corp [25.0%]	39.4689	-8.1113	exact	Pego			Santarem	https://www.gem.wiki/Elecgas_Pego_power_station	L100000400584	G100000400584	FR0010208488	0.25	836		13	2051	2091	2131
oil/gas	Portugal	Europe	Southern Europe	Elecgas Pego power station	G4			418	operating	2011		CC	NG					ElecGas SA [100%]	Endesa SA [50.0%]; ENGIE SA [25.0%]; Marubeni Corp [25.0%]	39.4689	-8.1113	exact	Pego			Santarem	https://www.gem.wiki/Elecgas_Pego_power_station	L100000400584	G100000400585	FR0010208488	0.25	836	836	13	2051	2091	2131
oil/gas	Saudi Arabia	Asia	Western Asia	Fadhili cogeneration power plant	1	محطة الفاضلي لتوليد الطاقة المزدوج		1520	operating	2020		CC	NG					Fadhili Plant Cogeneration Co [100.0%]	ENGIE SA [40.0%]; Saudi Arabian Oil Co [30.0%]; Saudi Electricity Co [30.0%]	27.1123	49.0714	exact	Jubail Industrial City			Eastern	https://www.gem.wiki/Fadhili_cogeneration_power_plant	L100000405542	G100000404751	FR0010208488	0.4	1520	1520	4	2060	2100	2140
oil/gas	United Arab Emirates	Asia	Western Asia	Fujairah F2 Integrated Water and power plant	1	محطة الفجيرة F2	FAPCO (Fuj F2)/Qidfa F2 Gas Power Plant	867	operating	2011	2031	CC	NG					Fujairah Asia Power Company PJSC [100.0%]	Abu Dhabi National Energy Company PJSC [60.0%]; ENGIE SA [20.0%]; Marubeni Corp [20.0%]	25.3019	56.3704	exact	Qidfa			Fujairah	https://www.gem.wiki/Fujairah_F2_Integrated_Water_and_power_plant	L100000405577	G100000405012	FR0010208488	0.2	2166		13	2051	2091	2131
oil/gas	United Arab Emirates	Asia	Western Asia	Fujairah F2 Integrated Water and power plant	2	محطة الفجيرة F2	FAPCO (Fuj F2)/Qidfa F2 Gas Power Plant	432	operating	2011	2031	CC	NG					Fujairah Asia Power Company PJSC [100.0%]	Abu Dhabi National Energy Company PJSC [60.0%]; ENGIE SA [20.0%]; Marubeni Corp [20.0%]	25.3019	56.3704	exact	Qidfa			Fujairah	https://www.gem.wiki/Fujairah_F2_Integrated_Water_and_power_plant	L100000405577	G100000405013	FR0010208488	0.2	2166		13	2051	2091	2131
oil/gas	United Arab Emirates	Asia	Western Asia	Fujairah F2 Integrated Water and power plant	3	محطة الفجيرة F2	FAPCO (Fuj F2)/Qidfa F2 Gas Power Plant	867	operating	2011	2031	CC	NG					Fujairah Asia Power Company PJSC [100.0%]	Abu Dhabi National Energy Company PJSC [60.0%]; ENGIE SA [20.0%]; Marubeni Corp [20.0%]	25.3019	56.3704	exact	Qidfa			Fujairah	https://www.gem.wiki/Fujairah_F2_Integrated_Water_and_power_plant	L100000405577	G100000405014	FR0010208488	0.2	2166	2166	13	2051	2091	2131
oil/gas	Germany	Europe	Western Europe	Gera-Lusan power station	IC			25	operating	2018		ICCC	NG					Engie Deutschland GmbH [100.0%]	ENGIE SA [100.0%]	50.8455	12.0788	exact	Gera			Thüringen	https://www.gem.wiki/Gera-Lusan_power_station	L100000408776	G100000412890	FR0010208488	1	25	25	6	2058	2098	2138
oil/gas	Germany	Europe	Western Europe	Gera-Tinz power station	IC			20	operating	2018		ICCC	NG					Engie Deutschland GmbH [100.0%]	ENGIE SA [100.0%]	50.8942	12.0745	exact	Gera			Thüringen	https://www.gem.wiki/Gera-Tinz_power_station	L100000400265	G100000400265	FR0010208488	1	20	20	6	2058	2098	2138
oil/gas	Belgium	Europe	Western Europe	Herdersbrug power station	1			465	operating	1998		CC	NG					Electrabel NV/SA [100%]	ENGIE SA [100.0%]	51.2629	3.2112	exact	Brugge			West Flanders	https://www.gem.wiki/Herdersbrug_power_station	L100000400027	G100000400027	FR0010208488	1	465	465	26	2038	2078	2118
oil/gas	Peru	Americas	Latin America and the Caribbean	Ilo power station	Ilo31-TG1	Central Termoeléctrica de Ilo	Ilo 21	190	operating	2013		GT	D					ENGIE Energía Perú SA [100%]	ENGIE Energía Perú SA [100.0%]	-17.776	-71.1893	exact	Ilo	Pacocha	Ilo	Moquegua	https://www.gem.wiki/Ilo_power_station	L100000103158	G100000406662	FR0010208488	1	1560		11	2053	2093	2133
oil/gas	Peru	Americas	Latin America and the Caribbean	Ilo power station	Ilo31-TG2	Central Termoeléctrica de Ilo	Ilo 21	190	operating	2013		GT	D					ENGIE Energía Perú SA [100%]	ENGIE Energía Perú SA [100.0%]	-17.776	-71.1893	exact	Ilo	Pacocha	Ilo	Moquegua	https://www.gem.wiki/Ilo_power_station	L100000103158	G100000406661	FR0010208488	1	1560		11	2053	2093	2133
oil/gas	Peru	Americas	Latin America and the Caribbean	Ilo power station	Ilo31-TG3	Central Termoeléctrica de Ilo	Ilo 21	190	operating	2013		GT	D					ENGIE Energía Perú SA [100%]	ENGIE Energía Perú SA [100.0%]	-17.776	-71.1893	exact	Ilo	Pacocha	Ilo	Moquegua	https://www.gem.wiki/Ilo_power_station	L100000103158	G100000406660	FR0010208488	1	1560		11	2053	2093	2133
oil/gas	Peru	Americas	Latin America and the Caribbean	Ilo power station	Ilo41-TG1	Central Termoeléctrica de Ilo	Ilo 21	240	operating	2016		GT	D					ENGIE Energía Perú SA [100%]	ENGIE Energía Perú SA [100.0%]	-17.776	-71.1893	exact	Ilo	Pacocha	Ilo	Moquegua	https://www.gem.wiki/Ilo_power_station	L100000103158	G100000406654	FR0010208488	1	1560		8	2056	2096	2136
oil/gas	Peru	Americas	Latin America and the Caribbean	Ilo power station	Ilo41-TG2	Central Termoeléctrica de Ilo	Ilo 21	240	operating	2016		GT	D					ENGIE Energía Perú SA [100%]	ENGIE Energía Perú SA [100.0%]	-17.776	-71.1893	exact	Ilo	Pacocha	Ilo	Moquegua	https://www.gem.wiki/Ilo_power_station	L100000103158	G100000406653	FR0010208488	1	1560		8	2056	2096	2136
oil/gas	Peru	Americas	Latin America and the Caribbean	Ilo power station	Ilo41-TG3	Central Termoeléctrica de Ilo	Ilo 21	240	operating	2016		GT	D					ENGIE Energía Perú SA [100%]	ENGIE Energía Perú SA [100.0%]	-17.776	-71.1893	exact	Ilo	Pacocha	Ilo	Moquegua	https://www.gem.wiki/Ilo_power_station	L100000103158	G100000406652	FR0010208488	1	1560	1560	8	2056	2096	2136
oil/gas	Saudi Arabia	Asia	Western Asia	Juaymah cogeneration Gas power plant	GT1	محطة الجعيمة لتوليد الكهرباء	Ju'Aymah/Juymah	155	operating	2006		GT	NG					Tihama Power Generation Co Ltd [100.0%]	ENGIE SA [60.0%]; Saudi Oger Ltd [40.0%]	27.0196	49.5784	approximate	Jubail			Eastern	https://www.gem.wiki/Juaymah_cogeneration_Gas_power_plant	L100000405546	G100000404984	FR0010208488	0.6	496.7		18	2046	2086	2126
oil/gas	Saudi Arabia	Asia	Western Asia	Juaymah cogeneration Gas power plant	GT2	محطة الجعيمة لتوليد الكهرباء	Ju'Aymah/Juymah	155	operating	2006		GT	NG					Tihama Power Generation Co Ltd [100.0%]	ENGIE SA [60.0%]; Saudi Oger Ltd [40.0%]	27.0196	49.5784	approximate	Jubail			Eastern	https://www.gem.wiki/Juaymah_cogeneration_Gas_power_plant	L100000405546	G100000404985	FR0010208488	0.6	496.7		18	2046	2086	2126
oil/gas	Saudi Arabia	Asia	Western Asia	Juaymah cogeneration Gas power plant	GT3	محطة الجعيمة لتوليد الكهرباء	Ju'Aymah/Juymah	186.7	operating	2015		GT	NG					Tihama Power Generation Co Ltd [100.0%]	ENGIE SA [60.0%]; Saudi Oger Ltd [40.0%]	27.0196	49.5784	approximate	Jubail			Eastern	https://www.gem.wiki/Juaymah_cogeneration_Gas_power_plant	L100000405546	G100000404983	FR0010208488	0.6	496.7	496.7	9	2055	2095	2135
oil/gas	Italy	Europe	Southern Europe	Leini power station	1			380	operating	2007		CC	NG					Engie Italia SpA [100.0%]	ENGIE SA [100.0%]	45.163	7.7505	exact	Leini			Turin	https://www.gem.wiki/Leini_power_station	L100000400391	G100000400391	FR0010208488	1	380	380	17	2047	2087	2127
oil/gas	Belgium	Europe	Western Europe	Les Awirs power station	CC1		Centrale des Awirs	875	pre-construction	2025		CC	NG					Electrabel NV/SA [100%]	ENGIE SA [100.0%]	50.5856	5.41687	exact	Flémalle			Liege	https://www.gem.wiki/Les_Awirs_power_station	L100000406373	G100000406281	FR0010208488	1	875	875	-1	2065	2105	2145
oil/gas	Belgium	Europe	Western Europe	Lillo Degussa power station	1		Evonik Degussa	42	operating	1999		CC	NG					Electrabel NV/SA [100%]	ENGIE SA [100.0%]	51.3095	4.30402	exact	Antwerp			Antwerp	https://www.gem.wiki/Lillo_Degussa_power_station	L100000400030	G100000400030	FR0010208488	1	85		25	2039	2079	2119
oil/gas	Belgium	Europe	Western Europe	Lillo Degussa power station	2		Evonik Degussa	43	operating	2011		CC	NG					Electrabel NV/SA [100%]	ENGIE SA [100.0%]	51.3095	4.30402	exact	Antwerp			Antwerp	https://www.gem.wiki/Lillo_Degussa_power_station	L100000400030	G100000410396	FR0010208488	1	85	85	13	2051	2091	2131
oil/gas	Netherlands	Europe	Western Europe	Maxima power station	4			440	operating	2010		CC	NG					ENGIE SA [100%]	ENGIE SA [100.0%]	52.5772	5.53	exact	Lelystad			Flevoland	https://www.gem.wiki/Maxima_power_station	L100000400544	G100000400544	FR0010208488	1	880		14	2050	2090	2130
oil/gas	Netherlands	Europe	Western Europe	Maxima power station	5			440	operating	2010		CC	NG					ENGIE SA [100%]	ENGIE SA [100.0%]	52.5772	5.53	exact	Lelystad			Flevoland	https://www.gem.wiki/Maxima_power_station	L100000400544	G100000400545	FR0010208488	1	880	880	14	2050	2090	2130
oil/gas	Chile	Americas	Latin America and the Caribbean	Mejillones power station	3	Termoeléctrica Mejillones	Red Dragon (Unit 4/Unit 5)/IEM2 (Unit 5)/IEM1 (Unit 4)/Infraestructura Energética de Mejillones	245	operating	2000		CC	NG					ENGIE Energía Chile SA [100%]	ENGIE Energía Chile SA [100.0%]	-23.0892	-70.4103	exact	Mejillones			Antofagasta	https://www.gem.wiki/Mejillones_power_station	L100000100184	G100000406727	FR0010208488	1	1704		24	2040	2080	2120
oil/gas	Chile	Americas	Latin America and the Caribbean	Mejillones power station	Unit 4	Termoeléctrica Mejillones	IEM2 (Unit 5)/Infraestructura Energética de Mejillones/Red Dragon (Unit 4/Unit 5)/IEM1 (Unit 4)	375	announced	2025		ST	NG/D					ENGIE Energía Chile SA [100%]	ENGIE Energía Chile SA [100.0%]	-23.0892	-70.4103	exact	Mejillones			Antofagasta	https://www.gem.wiki/Mejillones_power_station	L100000100184	G100000106833	FR0010208488	1	1704	1704	-1	2065	2105	2145
oil/gas	Australia	Oceania	Australia and New Zealand	Mintaro GT power station	1			90	operating	1990	2030	GT	NG					Synergen Power Pty Ltd [100.0%]	ENGIE SA [72.0%]; Mitsui & Co Ltd [28.0%]	-33.9032	138.738	exact	Stanley			South Australia	https://www.gem.wiki/Mintaro_GT_power_station	L100000405122	G100000401527	FR0010208488	0.72	90	90	34	2030	2070	2110
oil/gas	United Arab Emirates	Asia	Western Asia	Mirfa Independent Water and Power Project	1	محطة المرفأ للمنتج المستقل٫ محطة المرفأ الجديدة/محطة ميبكو	MIPCO/New Mifrah/New Al Mirfa Power Plant	90	operating	2017	2042	GT	NG					Mirfa International Power and Water Company PJSC [100.0%]	Abu Dhabi Water and Electricity Authority [60.0%]; ENGIE SA [20.0%]; Sojitz Corp [20.0%]	24.121	53.447	exact	Al Mirfa			Abu Dhabi	https://www.gem.wiki/Mirfa_Independent_Water_and_Power_Project	L100000405588	G100000405039	FR0010208488	0.2	1697		7	2057	2097	2137
oil/gas	United Arab Emirates	Asia	Western Asia	Mirfa Independent Water and Power Project	2	محطة المرفأ للمنتج المستقل٫ محطة المرفأ الجديدة/محطة ميبكو	MIPCO/New Mifrah/New Al Mirfa Power Plant	90	operating	2017	2042	GT	NG					Mirfa International Power and Water Company PJSC [100.0%]	Abu Dhabi Water and Electricity Authority [60.0%]; ENGIE SA [20.0%]; Sojitz Corp [20.0%]	24.121	53.447	exact	Al Mirfa			Abu Dhabi	https://www.gem.wiki/Mirfa_Independent_Water_and_Power_Project	L100000405588	G100000405040	FR0010208488	0.2	1697		7	2057	2097	2137
oil/gas	United Arab Emirates	Asia	Western Asia	Mirfa Independent Water and Power Project	3	محطة المرفأ للمنتج المستقل٫ محطة المرفأ الجديدة/محطة ميبكو	MIPCO/New Mifrah/New Al Mirfa Power Plant	90	operating	2017	2042	GT	NG					Mirfa International Power and Water Company PJSC [100.0%]	Abu Dhabi Water and Electricity Authority [60.0%]; ENGIE SA [20.0%]; Sojitz Corp [20.0%]	24.121	53.447	exact	Al Mirfa			Abu Dhabi	https://www.gem.wiki/Mirfa_Independent_Water_and_Power_Project	L100000405588	G100000405041	FR0010208488	0.2	1697		7	2057	2097	2137
oil/gas	United Arab Emirates	Asia	Western Asia	Mirfa Independent Water and Power Project	4	محطة المرفأ للمنتج المستقل٫ محطة المرفأ الجديدة/محطة ميبكو	MIPCO/New Mifrah/New Al Mirfa Power Plant	90	operating	2017	2042	GT	NG					Mirfa International Power and Water Company PJSC [100.0%]	Abu Dhabi Water and Electricity Authority [60.0%]; ENGIE SA [20.0%]; Sojitz Corp [20.0%]	24.121	53.447	exact	Al Mirfa			Abu Dhabi	https://www.gem.wiki/Mirfa_Independent_Water_and_Power_Project	L100000405588	G100000405042	FR0010208488	0.2	1697		7	2057	2097	2137
oil/gas	United Arab Emirates	Asia	Western Asia	Mirfa Independent Water and Power Project	CC	محطة المرفأ للمنتج المستقل٫ محطة المرفأ الجديدة/محطة ميبكو	MIPCO/New Mifrah/New Al Mirfa Power Plant	1337	operating	2017	2042	CC	NG					Mirfa International Power and Water Company PJSC [100.0%]	Abu Dhabi Water and Electricity Authority [60.0%]; ENGIE SA [20.0%]; Sojitz Corp [20.0%]	24.121	53.447	exact	Al Mirfa			Abu Dhabi	https://www.gem.wiki/Mirfa_Independent_Water_and_Power_Project	L100000405588	G100000405038	FR0010208488	0.2	1697	1697	7	2057	2097	2137
oil/gas	Belgium	Europe	Western Europe	Monsanto Oud-Lillo power station	1		Gasturbine Oud-Lillo/Oud-Lillo Monsanto	43	operating			not found	NG					Electrabel NV/SA [100%]	ENGIE SA [100.0%]	51.3155	4.28961	approximate	Antwerp			Antwerp	https://www.gem.wiki/Monsanto_Oud-Lillo_power_station	L100000406368	G100000406274	FR0010208488	1	43	43	-99	40	80	120
oil/gas	France	Europe	Western Europe	Montoir-De-Bretagne power station	1		SPEM/La Centrale Thermique de Grandes-Rivieres	435	operating	2010		CC	NG					Engie Energy France [100.0%]	ENGIE SA [100.0%]	47.3072	-2.13716	exact	Montoir-de-Bretagne			Loire-Atlantique	https://www.gem.wiki/Montoir-De-Bretagne_power_station	L100000400104	G100000400104	FR0010208488	1	435	435	14	2050	2090	2130
oil/gas	Italy	Europe	Southern Europe	Napoli Levante power station	1			400	operating	2009		CC	NG					Tirreno Power SpA [100.0%]	ENGIE SA [50.0%]; Energia Italiana SpA [50.0%]	40.8339	14.3006	exact	Napoli			Campania	https://www.gem.wiki/Napoli_Levante_power_station	L100000400407	G100000400407	FR0010208488	0.5	400	400	15	2049	2089	2129
oil/gas	United States	Americas	Northern America	Nassau Energy power station	CC1			55	retired	1991	2022	CC	NG/FO					Engie North America [100.0%]	ENGIE SA [100.0%]	40.7264	-73.5892	exact	Garden City	Nassau		New York	https://www.gem.wiki/Nassau_Energy_power_station	L100000401658	G100000401732	FR0010208488	1	55	55	33	2031	2071	2111
oil/gas	Italy	Europe	Southern Europe	Nera Montoro power station	1			50	operating	1994		CC	NG					Engie Servizi SpA [100.0%]	ENGIE SA [100.0%]	42.4943	12.4724	exact	Nera Montoro			Terni	https://www.gem.wiki/Nera_Montoro_power_station	L100000400408	G100000400408	FR0010208488	1	50	50	30	2034	2074	2114
oil/gas	United States	Americas	Northern America	Oyster Creek Unit VIII power station	CC1			498	operating	1994		CC	NG/OG					Engie North America [50.0%]; Toyota Tsusho Corp [37.5%]; GE Energy Financial Services [12.5%]	ENGIE SA [50.0%]; General Electric Co [12.5%]	28.9802	-95.342	exact	Freeport	Brazoria		Texas	https://www.gem.wiki/Oyster_Creek_Unit_VIII_power_station	L100000401670	G100000401762	FR0010208488	0.5	498	498	30	2034	2074	2114
oil/gas	Saudi Arabia	Asia	Western Asia	Ras Tanura Tihama power station	1	محطة توليد رأس تنورة		75	operating	2006		GT	NG					Tihama Power Generation Co Ltd [100.0%]	ENGIE SA [60.0%]; Saudi Oger Ltd [40.0%]	26.8003	50.0039	exact	Ras Tanura			Ash Sharqiyah	https://www.gem.wiki/Ras_Tanura_Tihama_power_station	L100000407703	G100000410109	FR0010208488	0.6	150		18	2046	2086	2126
oil/gas	Saudi Arabia	Asia	Western Asia	Ras Tanura Tihama power station	2	محطة توليد رأس تنورة		75	operating	2006		GT	NG					Tihama Power Generation Co Ltd [100.0%]	ENGIE SA [60.0%]; Saudi Oger Ltd [40.0%]	26.8003	50.0039	exact	Ras Tanura			Ash Sharqiyah	https://www.gem.wiki/Ras_Tanura_Tihama_power_station	L100000407703	G100000410108	FR0010208488	0.6	150	150	18	2046	2086	2126
oil/gas	Saudi Arabia	Asia	Western Asia	Riyadh PP11 power station	2	محطة الكهرباء الخامسة		824	operating	1979		CC	NG/LFO					Dhuruma O&M Co Ltd [100.0%]	ENGIE SA [80.0%]; Aljomaih Energy & Water Co Ltd [20.0%]	24.7734	46.6563	exact	Dhurma - Riyadh			Ar Riyad	https://www.gem.wiki/Riyadh_PP11_power_station	L100000407708	G100000410127	FR0010208488	0.8	1805		45	2019	2059	2099
oil/gas	Saudi Arabia	Asia	Western Asia	Riyadh PP11 power station	1	محطة الكهرباء الخامسة		981	operating	2013		CC	NG/LFO					Dhuruma O&M Co Ltd [100.0%]	ENGIE SA [80.0%]; Aljomaih Energy & Water Co Ltd [20.0%]	24.7734	46.6563	exact	Dhurma - Riyadh			Ar Riyad	https://www.gem.wiki/Riyadh_PP11_power_station	L100000407708	G100000410128	FR0010208488	0.8	1805	1805	11	2053	2093	2133
oil/gas	Germany	Europe	Western Europe	Romerbrucke power station	2b	HKW Römerbrücke/Kraftwerk Römerbrücke	Saarland power plant	53	operating	1965		ST	NG					Energie SaarLorLux AG [100.0%]	ENGIE SA [51.0%]; Stadtwerke Saarbrücken GmbH [49.0%]	49.2239	7.0149	exact	Saarbrücken			Saarland	https://www.gem.wiki/Romerbrucke_power_station	L100000101975	G100000409751	FR0010208488	0.51	177		59	2005	2045	2085
oil/gas	Germany	Europe	Western Europe	Romerbrucke power station	1	HKW Römerbrücke/Kraftwerk Römerbrücke	Saarland power plant	74	operating	2005		CC	NG					Energie SaarLorLux AG [100.0%]	ENGIE SA [51.0%]; Stadtwerke Saarbrücken GmbH [49.0%]	49.2239	7.0149	exact	Saarbrücken			Saarland	https://www.gem.wiki/Romerbrucke_power_station	L100000101975	G100000400242	FR0010208488	0.51	177		19	2045	2085	2125
oil/gas	Germany	Europe	Western Europe	Romerbrucke power station	IC	HKW Römerbrücke/Kraftwerk Römerbrücke	Saarland power plant	50	operating	2022		ICCC	NG					Energie SaarLorLux AG [100.0%]	ENGIE SA [51.0%]; Stadtwerke Saarbrücken GmbH [49.0%]	49.2239	7.0149	exact	Saarbrücken			Saarland	https://www.gem.wiki/Romerbrucke_power_station	L100000101975	G100000412845	FR0010208488	0.51	177	177	2	2062	2102	2142
oil/gas	Belgium	Europe	Western Europe	Saint-Ghislain power station	1			350	operating	2001		CC	NG					Electrabel NV/SA [100%]	ENGIE SA [100.0%]	50.4719	3.8248	exact	Baudour			Hainaut	https://www.gem.wiki/Saint-Ghislain_power_station	L100000400033	G100000400033	FR0010208488	1	350	350	23	2041	2081	2121
oil/gas	France	Europe	Western Europe	Saint-Ouen-sur-Seine power station	1	CENTRALE THERMIQUE DE BATELIERS		128	operating	2001		GT	NG					Paris Urban Heating Company SA [100.0%]	ENGIE SA [66.0%]; City of Paris [33.0%]	48.9117	2.32764	exact	Saint-Ouen-sur-Seine			Ile-de-France	https://www.gem.wiki/Saint-Ouen-sur-Seine_power_station	L100000407655	G100000409982	FR0010208488	0.66	128	128	23	2041	2081	2121
oil/gas	Belgium	Europe	Western Europe	Sappi Lanaken power station	1			43	operating			not found	NG					Electrabel NV/SA [100%]	ENGIE SA [100.0%]	50.8827	5.64195	exact	Lanaken			Limburg Province	https://www.gem.wiki/Sappi_Lanaken_power_station	L100000406370	G100000406276	FR0010208488	1	43	43	-99	40	80	120
oil/gas	Belgium	Europe	Western Europe	Scheldelaan Exxonmobil power station	1			140	operating	2009		not found	NG					Electrabel NV/SA [100%]	ENGIE SA [100.0%]	51.254	4.334	exact	Antwerp			Antwerp	https://www.gem.wiki/Scheldelaan_Exxonmobil_power_station	L100000400034	G100000400034	FR0010208488	1	140	140	15	2049	2089	2129
oil/gas	Singapore	Asia	South-eastern Asia	Senoko power station	1			425	operating	1996		CC	NG					Senoko Energy Pte Ltd [100.0%]	ENGIE SA [30.0%]; Marubeni Corp [30.0%]; Kansai Electric Power Co [15.0%]; Kyushu Electric Power Co Inc [15.0%]; Japan Bank for International Cooperation [10.0%]	1.4655	103.8	exact	Sembawang			North Region	https://www.gem.wiki/Senoko_power_station	L100000405353	G100000404571	FR0010208488	0.3	3292		28	2036	2076	2116
oil/gas	Singapore	Asia	South-eastern Asia	Senoko power station	2			425	operating	1996		CC	NG					Senoko Energy Pte Ltd [100.0%]	ENGIE SA [30.0%]; Marubeni Corp [30.0%]; Kansai Electric Power Co [15.0%]; Kyushu Electric Power Co Inc [15.0%]; Japan Bank for International Cooperation [10.0%]	1.4655	103.8	exact	Sembawang			North Region	https://www.gem.wiki/Senoko_power_station	L100000405353	G100000404572	FR0010208488	0.3	3292		28	2036	2076	2116
oil/gas	Singapore	Asia	South-eastern Asia	Senoko power station	3			360	operating	2002		CC	NG					Senoko Energy Pte Ltd [100.0%]	ENGIE SA [30.0%]; Marubeni Corp [30.0%]; Kansai Electric Power Co [15.0%]; Kyushu Electric Power Co Inc [15.0%]; Japan Bank for International Cooperation [10.0%]	1.4655	103.8	exact	Sembawang			North Region	https://www.gem.wiki/Senoko_power_station	L100000405353	G100000404573	FR0010208488	0.3	3292		22	2042	2082	2122
oil/gas	Singapore	Asia	South-eastern Asia	Senoko power station	4			360	operating	2004		CC	NG					Senoko Energy Pte Ltd [100.0%]	ENGIE SA [30.0%]; Marubeni Corp [30.0%]; Kansai Electric Power Co [15.0%]; Kyushu Electric Power Co Inc [15.0%]; Japan Bank for International Cooperation [10.0%]	1.4655	103.8	exact	Sembawang			North Region	https://www.gem.wiki/Senoko_power_station	L100000405353	G100000404574	FR0010208488	0.3	3292		20	2044	2084	2124
oil/gas	Singapore	Asia	South-eastern Asia	Senoko power station	5			360	operating	2004		CC	NG					Senoko Energy Pte Ltd [100.0%]	ENGIE SA [30.0%]; Marubeni Corp [30.0%]; Kansai Electric Power Co [15.0%]; Kyushu Electric Power Co Inc [15.0%]; Japan Bank for International Cooperation [10.0%]	1.4655	103.8	exact	Sembawang			North Region	https://www.gem.wiki/Senoko_power_station	L100000405353	G100000404575	FR0010208488	0.3	3292		20	2044	2084	2124
oil/gas	Singapore	Asia	South-eastern Asia	Senoko power station	6			431	operating	2013		CC	NG					Senoko Energy Pte Ltd [100.0%]	ENGIE SA [30.0%]; Marubeni Corp [30.0%]; Kansai Electric Power Co [15.0%]; Kyushu Electric Power Co Inc [15.0%]; Japan Bank for International Cooperation [10.0%]	1.4655	103.8	exact	Sembawang			North Region	https://www.gem.wiki/Senoko_power_station	L100000405353	G100000404576	FR0010208488	0.3	3292		11	2053	2093	2133
oil/gas	Singapore	Asia	South-eastern Asia	Senoko power station	7			431	operating	2013		CC	NG					Senoko Energy Pte Ltd [100.0%]	ENGIE SA [30.0%]; Marubeni Corp [30.0%]; Kansai Electric Power Co [15.0%]; Kyushu Electric Power Co Inc [15.0%]; Japan Bank for International Cooperation [10.0%]	1.4655	103.8	exact	Sembawang			North Region	https://www.gem.wiki/Senoko_power_station	L100000405353	G100000404577	FR0010208488	0.3	3292		11	2053	2093	2133
oil/gas	Singapore	Asia	South-eastern Asia	Senoko power station	ST1			250	operating			ST	NG/FO					Senoko Energy Pte Ltd [100.0%]	ENGIE SA [30.0%]; Marubeni Corp [30.0%]; Kansai Electric Power Co [15.0%]; Kyushu Electric Power Co Inc [15.0%]; Japan Bank for International Cooperation [10.0%]	1.4655	103.8	exact	Sembawang			North Region	https://www.gem.wiki/Senoko_power_station	L100000405353	G100000413180	FR0010208488	0.3	3292		-99	40	80	120
oil/gas	Singapore	Asia	South-eastern Asia	Senoko power station	ST2			250	operating			ST	NG/FO					Senoko Energy Pte Ltd [100.0%]	ENGIE SA [30.0%]; Marubeni Corp [30.0%]; Kansai Electric Power Co [15.0%]; Kyushu Electric Power Co Inc [15.0%]; Japan Bank for International Cooperation [10.0%]	1.4655	103.8	exact	Sembawang			North Region	https://www.gem.wiki/Senoko_power_station	L100000405353	G100000413179	FR0010208488	0.3	3292	3292	-99	40	80	120
oil/gas	Italy	Europe	Southern Europe	Settimo Torinese power station	1			60	operating	1995		CC	NG					Engie Servizi SpA [100.0%]	ENGIE SA [100.0%]	45.1261	7.73778	exact	Settimo Torinese			Turin	https://www.gem.wiki/Settimo_Torinese_power_station	L100000400450	G100000400450	FR0010208488	1	60	60	29	2035	2075	2115
oil/gas	Saudi Arabia	Asia	Western Asia	Shedgum cogeneration Gas power plant	GT1		Shedgum Aramco	155	operating	2006		GT	NG					Tihama Power Generation Co Ltd [100.0%]	ENGIE SA [60.0%]; Saudi Oger Ltd [40.0%]	25.6516	49.3855	exact	Al Ahsa			Eastern	https://www.gem.wiki/Shedgum_cogeneration_Gas_power_plant	L100000405564	G100000404986	FR0010208488	0.6	496.7		18	2046	2086	2126
oil/gas	Saudi Arabia	Asia	Western Asia	Shedgum cogeneration Gas power plant	GT2		Shedgum Aramco	155	operating	2006		GT	NG					Tihama Power Generation Co Ltd [100.0%]	ENGIE SA [60.0%]; Saudi Oger Ltd [40.0%]	25.6516	49.3855	exact	Al Ahsa			Eastern	https://www.gem.wiki/Shedgum_cogeneration_Gas_power_plant	L100000405564	G100000404987	FR0010208488	0.6	496.7		18	2046	2086	2126
oil/gas	Saudi Arabia	Asia	Western Asia	Shedgum cogeneration Gas power plant	GT3		Shedgum Aramco	186.7	operating	2015		GT	NG					Tihama Power Generation Co Ltd [100.0%]	ENGIE SA [60.0%]; Saudi Oger Ltd [40.0%]	25.6516	49.3855	exact	Al Ahsa			Eastern	https://www.gem.wiki/Shedgum_cogeneration_Gas_power_plant	L100000405564	G100000404988	FR0010208488	0.6	496.7	496.7	9	2055	2095	2135
oil/gas	United Arab Emirates	Asia	Western Asia	Shuweihat S1 power plant	1	مجمع الشويهات للطاقة والمياه/محطة الشويهات S1 المستقلة للمياه والطاقة		1615	operating	2004	2025	CC	NG					Shuweihat CMS International Power Company PJSC [100.0%]	Abu Dhabi National Energy Company PJSC [60.0%]; ENGIE SA [20.0%]; Sumitomo Corp [20.0%]	24.1651	52.5697	exact	Jebel Dhanna			Abu Dhabi	https://www.gem.wiki/Shuweihat_S1_power_plant	L100000405592	G100000405048	FR0010208488	0.2	1615	1615	20	2044	2084	2124
oil/gas	United Arab Emirates	Asia	Western Asia	Shuweihat S2 power plant	1	مجمع الشويهات للطاقة والمياه/محطة الشويهات S2 المستقلة للمياه والطاقة		820.5	operating	2011	2036	CC	NG/FO					Ruwais Power Company PJSC [100.0%]	Abu Dhabi National Energy Company PJSC [54.0%]; ENGIE SA [20.0%]; Marubeni Corp [10.0%]; Osaka Gas Co Ltd [10.0%]; Abu Dhabi Water and Electricity Authority [6.0%]	24.1569	52.5692	exact	Jebel Dhanna			Abu Dhabi	https://www.gem.wiki/Shuweihat_S2_power_plant	L100000405593	G100000405049	FR0010208488	0.2	1641		13	2051	2091	2131
oil/gas	United Arab Emirates	Asia	Western Asia	Shuweihat S2 power plant	2	مجمع الشويهات للطاقة والمياه/محطة الشويهات S2 المستقلة للمياه والطاقة		820.5	operating	2012	2036	CC	NG/FO					Ruwais Power Company PJSC [100.0%]	Abu Dhabi National Energy Company PJSC [54.0%]; ENGIE SA [20.0%]; Marubeni Corp [10.0%]; Osaka Gas Co Ltd [10.0%]; Abu Dhabi Water and Electricity Authority [6.0%]	24.1569	52.5692	exact	Jebel Dhanna			Abu Dhabi	https://www.gem.wiki/Shuweihat_S2_power_plant	L100000405593	G100000405050	FR0010208488	0.2	1641	1641	12	2052	2092	2132
oil/gas	Portugal	Europe	Southern Europe	Tapada do Outeiro power station	G1			330	operating	1998		CC	NG					TrustEnergy BV [100%]	ENGIE SA [50.0%]; Marubeni Corp [50.0%]	41.07	-8.4587	exact	Medas			Porto	https://www.gem.wiki/Tapada_do_Outeiro_power_station	L100000400593	G100000400593	FR0010208488	0.5	1040		26	2038	2078	2118
oil/gas	Portugal	Europe	Southern Europe	Tapada do Outeiro power station	G2			330	operating	1998		CC	NG					TrustEnergy BV [100%]	ENGIE SA [50.0%]; Marubeni Corp [50.0%]	41.07	-8.4587	exact	Medas			Porto	https://www.gem.wiki/Tapada_do_Outeiro_power_station	L100000400593	G100000400594	FR0010208488	0.5	1040		26	2038	2078	2118
oil/gas	Portugal	Europe	Southern Europe	Tapada do Outeiro power station	G3			330	operating	1999		CC	NG					TrustEnergy BV [100%]	ENGIE SA [50.0%]; Marubeni Corp [50.0%]	41.07	-8.4587	exact	Medas			Porto	https://www.gem.wiki/Tapada_do_Outeiro_power_station	L100000400593	G100000400595	FR0010208488	0.5	1040	1040	25	2039	2079	2119
oil/gas	United Arab Emirates	Asia	Western Asia	Taweelah A1 power plant	1	محطة الطويلة A1	Taweelah A1 Integrated Water and Power Plant	1672.5	operating	2009	2029	CC	NG					Total Tractebel Emirates O&M Co SA [100.0%]	ENGIE SA [50.0%]; TotalEnergies SE [50.0%]	24.7604	54.6797	exact	Al Taweelah			Abu Dhabi	https://www.gem.wiki/Taweelah_A1_power_plant	L100000405595	G100000405053	FR0010208488	0.5	1672.5	1672.5	15	2049	2089	2129
oil/gas	United Arab Emirates	Asia	Western Asia	Taweelah A2 power plant	2	محطة الطويلة A2	Taweelah A2 Integrated Water and Power Plant	710	retired	2001	2022	CC	NG					Total Tractebel Emirates O&M Co SA [100.0%]	ENGIE SA [50.0%]; TotalEnergies SE [50.0%]	24.761	54.6826	exact	Al Taweelah			Abu Dhabi	https://www.gem.wiki/Taweelah_A2_power_plant	L100000405596	G100000405054	FR0010208488	0.5	710	710	23	2041	2081	2121
oil/gas	Chile	Americas	Latin America and the Caribbean	Tocopilla power station	16	Termoeléctrica Tocopilla		394	operating	2001		CC	NG					ENGIE Energía Chile SA [100%]	ENGIE Energía Chile SA [100.0%]	-22.0964	-70.2118	exact	Tocopilla		Tocopilla	Antofagasta Region	https://www.gem.wiki/Tocopilla_power_station	L100000100186	G100000406715	FR0010208488	1	835	835	23	2041	2081	2121
oil/gas	Italy	Europe	Southern Europe	Torrevaldaliga Sud power station	TV5			760	operating	2004		CC	NG					Tirreno Power SpA [100.0%]	ENGIE SA [50.0%]; Energia Italiana SpA [50.0%]	42.1241	11.7624	exact	Civitavecchia			Rome	https://www.gem.wiki/Torrevaldaliga_Sud_power_station	L100000400469	G100000400469	FR0010208488	0.5	2360		20	2044	2084	2124
oil/gas	Italy	Europe	Southern Europe	Torrevaldaliga Sud power station	TV6			380	operating	2005		CC	NG					Tirreno Power SpA [100.0%]	ENGIE SA [50.0%]; Energia Italiana SpA [50.0%]	42.1241	11.7624	exact	Civitavecchia			Rome	https://www.gem.wiki/Torrevaldaliga_Sud_power_station	L100000400469	G100000400470	FR0010208488	0.5	2360		19	2045	2085	2125
oil/gas	Italy	Europe	Southern Europe	Torrevaldaliga Sud power station	TV4			320	mothballed			GT	NG					Tirreno Power SpA [100.0%]	ENGIE SA [50.0%]; Energia Italiana SpA [50.0%]	42.1241	11.7624	exact	Civitavecchia			Rome	https://www.gem.wiki/Torrevaldaliga_Sud_power_station	L100000400469	G100000409808	FR0010208488	0.5	2360		-99	40	80	120
oil/gas	Italy	Europe	Southern Europe	Torrevaldaliga Sud power station	TV7			900	cancelled			CC	NG					Tirreno Power SpA [100.0%]	ENGIE SA [50.0%]; Energia Italiana SpA [50.0%]	42.1241	11.7624	exact	Civitavecchia			Rome	https://www.gem.wiki/Torrevaldaliga_Sud_power_station	L100000400469	G100000409807	FR0010208488	0.5	2360	2360	-99	40	80	120
oil/gas	Mexico	Americas	Latin America and the Caribbean	Tractebel Monterrey power station	1	Central CC Tractebel Monterrey		284	operating	2003		CC	NG					Tractebel Energía De Monterrey S de RL de CV [100%]	ENGIE SA [100.0%]	25.7664	-100.542	exact	García			Nuevo León	https://gem.wiki/Tractebel_Monterrey_power_station	L100000406255	G100000406442	FR0010208488	1	284	284	21	2043	2083	2123
oil/gas	Pakistan	Asia	Southern Asia	Uch power station	1			586	operating	2000		CC	NG/D					UCH Power Ltd [100.0%]	ENGIE SA; Swicorp Co	28.5827	68.1762	exact	Dera Murad Jamali		Nasirabad District	Balochistan	https://www.gem.wiki/Uch_power_station	L100000406037	G100000406123	FR0010208488	0.5	990		24	2040	2080	2120
oil/gas	Pakistan	Asia	Southern Asia	Uch power station	2			404	operating	2014		CC	NG/D					UCH-II Power Pvt Ltd [100.0%]	ENGIE SA; Swicorp Co	28.5827	68.1762	exact	Dera Murad Jamali		Nasirabad District	Balochistan	https://www.gem.wiki/Uch_power_station	L100000406037	G100000406124	FR0010208488	0.5	990	990	10	2054	2094	2134
oil/gas	United Arab Emirates	Asia	Western Asia	Umm Al Nar West and East Integrated Water and power plant	GT01	محطة أم النار الغربية للطاقة	Umm Al Nar East plant/UAN East/Umm Al Nar West cogeneration plant	59	operating	1979		GT	NG/FO					Arabian Power Company PJSC [100.0%]	Arabian United Power Company PJSC [60.0%]; ENGIE SA [20.0%]; Chubu Electric Power Co Inc [10.0%]; Tokyo Electric Power Co [10.0%]	24.4348	54.4876	exact	Abu Dhabi			Abu Dhabi	https://www.gem.wiki/Umm_Al_Nar_West_and_East_Integrated_Water_and_power_plant	L100000405598	G100000405072	FR0010208488	0.2	3078		45	2019	2059	2099
oil/gas	United Arab Emirates	Asia	Western Asia	Umm Al Nar West and East Integrated Water and power plant	GT02	محطة أم النار الغربية للطاقة	Umm Al Nar East plant/UAN East/Umm Al Nar West cogeneration plant	59	operating	1979		GT	NG/FO					Arabian Power Company PJSC [100.0%]	Arabian United Power Company PJSC [60.0%]; ENGIE SA [20.0%]; Chubu Electric Power Co Inc [10.0%]; Tokyo Electric Power Co [10.0%]	24.4348	54.4876	exact	Abu Dhabi			Abu Dhabi	https://www.gem.wiki/Umm_Al_Nar_West_and_East_Integrated_Water_and_power_plant	L100000405598	G100000405073	FR0010208488	0.2	3078		45	2019	2059	2099
oil/gas	United Arab Emirates	Asia	Western Asia	Umm Al Nar West and East Integrated Water and power plant	ST1	محطة أم النار الغربية للطاقة	Umm Al Nar East plant/UAN East/Umm Al Nar West cogeneration plant	60	operating	1981		ST	NG/FO					Arabian Power Company PJSC [100.0%]	Arabian United Power Company PJSC [60.0%]; ENGIE SA [20.0%]; Chubu Electric Power Co Inc [10.0%]; Tokyo Electric Power Co [10.0%]	24.4348	54.4876	exact	Abu Dhabi			Abu Dhabi	https://www.gem.wiki/Umm_Al_Nar_West_and_East_Integrated_Water_and_power_plant	L100000405598	G100000405064	FR0010208488	0.2	3078		43	2021	2061	2101
oil/gas	United Arab Emirates	Asia	Western Asia	Umm Al Nar West and East Integrated Water and power plant	ST2	محطة أم النار الغربية للطاقة	Umm Al Nar East plant/UAN East/Umm Al Nar West cogeneration plant	60	operating	1981		ST	NG/FO					Arabian Power Company PJSC [100.0%]	Arabian United Power Company PJSC [60.0%]; ENGIE SA [20.0%]; Chubu Electric Power Co Inc [10.0%]; Tokyo Electric Power Co [10.0%]	24.4348	54.4876	exact	Abu Dhabi			Abu Dhabi	https://www.gem.wiki/Umm_Al_Nar_West_and_East_Integrated_Water_and_power_plant	L100000405598	G100000405065	FR0010208488	0.2	3078		43	2021	2061	2101
oil/gas	United Arab Emirates	Asia	Western Asia	Umm Al Nar West and East Integrated Water and power plant	ST3	محطة أم النار الغربية للطاقة	Umm Al Nar East plant/UAN East/Umm Al Nar West cogeneration plant	60	operating	1981		ST	NG/FO					Arabian Power Company PJSC [100.0%]	Arabian United Power Company PJSC [60.0%]; ENGIE SA [20.0%]; Chubu Electric Power Co Inc [10.0%]; Tokyo Electric Power Co [10.0%]	24.4348	54.4876	exact	Abu Dhabi			Abu Dhabi	https://www.gem.wiki/Umm_Al_Nar_West_and_East_Integrated_Water_and_power_plant	L100000405598	G100000405066	FR0010208488	0.2	3078		43	2021	2061	2101
oil/gas	United Arab Emirates	Asia	Western Asia	Umm Al Nar West and East Integrated Water and power plant	ST4	محطة أم النار الغربية للطاقة	Umm Al Nar East plant/UAN East/Umm Al Nar West cogeneration plant	60	operating	1981		ST	NG/FO					Arabian Power Company PJSC [100.0%]	Arabian United Power Company PJSC [60.0%]; ENGIE SA [20.0%]; Chubu Electric Power Co Inc [10.0%]; Tokyo Electric Power Co [10.0%]	24.4348	54.4876	exact	Abu Dhabi			Abu Dhabi	https://www.gem.wiki/Umm_Al_Nar_West_and_East_Integrated_Water_and_power_plant	L100000405598	G100000405067	FR0010208488	0.2	3078		43	2021	2061	2101
oil/gas	United Arab Emirates	Asia	Western Asia	Umm Al Nar West and East Integrated Water and power plant	ST5	محطة أم النار الغربية للطاقة	Umm Al Nar East plant/UAN East/Umm Al Nar West cogeneration plant	60	operating	1981		ST	NG/FO					Arabian Power Company PJSC [100.0%]	Arabian United Power Company PJSC [60.0%]; ENGIE SA [20.0%]; Chubu Electric Power Co Inc [10.0%]; Tokyo Electric Power Co [10.0%]	24.4348	54.4876	exact	Abu Dhabi			Abu Dhabi	https://www.gem.wiki/Umm_Al_Nar_West_and_East_Integrated_Water_and_power_plant	L100000405598	G100000405068	FR0010208488	0.2	3078		43	2021	2061	2101
oil/gas	United Arab Emirates	Asia	Western Asia	Umm Al Nar West and East Integrated Water and power plant	ST6	محطة أم النار الغربية للطاقة	Umm Al Nar East plant/UAN East/Umm Al Nar West cogeneration plant	60	operating	1981		ST	NG/FO					Arabian Power Company PJSC [100.0%]	Arabian United Power Company PJSC [60.0%]; ENGIE SA [20.0%]; Chubu Electric Power Co Inc [10.0%]; Tokyo Electric Power Co [10.0%]	24.4348	54.4876	exact	Abu Dhabi			Abu Dhabi	https://www.gem.wiki/Umm_Al_Nar_West_and_East_Integrated_Water_and_power_plant	L100000405598	G100000405069	FR0010208488	0.2	3078		43	2021	2061	2101
oil/gas	United Arab Emirates	Asia	Western Asia	Umm Al Nar West and East Integrated Water and power plant	ST7	محطة أم النار الغربية للطاقة	Umm Al Nar East plant/UAN East/Umm Al Nar West cogeneration plant	150	operating	1998		ST	NG/FO					Arabian Power Company PJSC [100.0%]	Arabian United Power Company PJSC [60.0%]; ENGIE SA [20.0%]; Chubu Electric Power Co Inc [10.0%]; Tokyo Electric Power Co [10.0%]	24.4348	54.4876	exact	Abu Dhabi			Abu Dhabi	https://www.gem.wiki/Umm_Al_Nar_West_and_East_Integrated_Water_and_power_plant	L100000405598	G100000405070	FR0010208488	0.2	3078		26	2038	2078	2118
oil/gas	United Arab Emirates	Asia	Western Asia	Umm Al Nar West and East Integrated Water and power plant	ST8	محطة أم النار الغربية للطاقة	Umm Al Nar East plant/UAN East/Umm Al Nar West cogeneration plant	150	operating	1998		ST	NG/FO					Arabian Power Company PJSC [100.0%]	Arabian United Power Company PJSC [60.0%]; ENGIE SA [20.0%]; Chubu Electric Power Co Inc [10.0%]; Tokyo Electric Power Co [10.0%]	24.4348	54.4876	exact	Abu Dhabi			Abu Dhabi	https://www.gem.wiki/Umm_Al_Nar_West_and_East_Integrated_Water_and_power_plant	L100000405598	G100000405071	FR0010208488	0.2	3078		26	2038	2078	2118
oil/gas	United Arab Emirates	Asia	Western Asia	Umm Al Nar West and East Integrated Water and power plant	CC	محطة أم النار الغربية للطاقة	Umm Al Nar Gas Thermal IWPP Project/New Umm Al Nar plant/UAN (Sas Al Nakhl) cogeneration CCGT/Sas Al Nakheel (SASN) power station	2300	operating	2007	2027	CC	NG					Abu Dhabi National Energy Company PJSC [60.0%]; Engie Energy France [20.0%]; JERA Co Inc [20.0%]	Abu Dhabi National Energy Company PJSC [60.0%]; ENGIE SA [20.0%]; Chubu Electric Power Co Inc [10.0%]; Tokyo Electric Power Co [10.0%]	24.4348	54.4876	exact	Abu Dhabi			Abu Dhabi	https://www.gem.wiki/Umm_Al_Nar_West_and_East_Integrated_Water_and_power_plant	L100000405598	G100000410458	FR0010208488	0.2	3078	3078	17	2047	2087	2127
oil/gas	Saudi Arabia	Asia	Western Asia	Uthmaniyah cogeneration Gas power plant	GT1	محطة توليد العثمانية		155	operating	2006		GT	NG					Tihama Power Generation Co Ltd [100.0%]	ENGIE SA [60.0%]; Saudi Oger Ltd [40.0%]	25.19	49.307	exact	Uthmaniyah			Eastern	https://www.gem.wiki/Uthmaniyah_cogeneration_Gas_power_plant	L100000405566	G100000404980	FR0010208488	0.6	496.7		18	2046	2086	2126
oil/gas	Saudi Arabia	Asia	Western Asia	Uthmaniyah cogeneration Gas power plant	GT2	محطة توليد العثمانية		155	operating	2006		GT	NG					Tihama Power Generation Co Ltd [100.0%]	ENGIE SA [60.0%]; Saudi Oger Ltd [40.0%]	25.19	49.307	exact	Uthmaniyah			Eastern	https://www.gem.wiki/Uthmaniyah_cogeneration_Gas_power_plant	L100000405566	G100000404981	FR0010208488	0.6	496.7		18	2046	2086	2126
oil/gas	Saudi Arabia	Asia	Western Asia	Uthmaniyah cogeneration Gas power plant	GT3	محطة توليد العثمانية		186.7	operating	2015		GT	NG					Tihama Power Generation Co Ltd [100.0%]	ENGIE SA [60.0%]; Saudi Oger Ltd [40.0%]	25.19	49.307	exact	Uthmaniyah			Eastern	https://www.gem.wiki/Uthmaniyah_cogeneration_Gas_power_plant	L100000405566	G100000404982	FR0010208488	0.6	496.7	496.7	9	2055	2095	2135
oil/gas	Italy	Europe	Southern Europe	Vado Ligure power station	VL5			800	operating	2007		CC	NG					Tirreno Power SpA [100.0%]	ENGIE SA [50.0%]; Energia Italiana SpA [50.0%]	44.2755	8.4305	exact	Vado Ligure			Savona	https://www.gem.wiki/Vado_Ligure_power_station	L100000102858	G100000400475	FR0010208488	0.5	3140		17	2047	2087	2127
oil/gas	Italy	Europe	Southern Europe	Vado Ligure power station	VL7			900	cancelled			CC	NG					Tirreno Power SpA [100.0%]	ENGIE SA [50.0%]; Energia Italiana SpA [50.0%]	44.2755	8.4305	exact	Vado Ligure			Savona	https://www.gem.wiki/Vado_Ligure_power_station	L100000102858	G100000409802	FR0010208488	0.5	3140	3140	-99	40	80	120
oil/gas	Belgium	Europe	Western Europe	Vilvoorde power station	1			255	operating	2001		GT	NG					Electrabel NV/SA [100%]	ENGIE SA [100.0%]	50.9414	4.4246	exact	Vilvoorde			Flemish Brabant	https://www.gem.wiki/Vilvoorde_power_station	L100000400037	G100000400037	FR0010208488	1	1125		23	2041	2081	2121
oil/gas	Belgium	Europe	Western Europe	Vilvoorde power station	2			870	shelved	2025		CC	NG					Electrabel NV/SA [100%]	ENGIE SA [100.0%]	50.9414	4.4246	exact	Vilvoorde			Flemish Brabant	https://www.gem.wiki/Vilvoorde_power_station	L100000400037	G100000406273	FR0010208488	1	1125	1125	-1	2065	2105	2145
oil/gas	France	Europe	Western Europe	Vitry-sur-Seine cogeneration power station	1			125	operating	2001		GT	NG					COGETHERM; Paris Urban Heating Company SA	City of Paris; ENGIE SA; Electricité de France SA	48.7892	2.41731	exact	Vitry-sur-Seine			Val-de-Marne	https://www.gem.wiki/Vitry-sur-Seine_cogeneration_power_station	L100000406385	G100000406298	FR0010208488	0.333333	125	125	23	2041	2081	2121
oil/gas	Italy	Europe	Southern Europe	Voghera power station	1			381	operating	2005		CC	NG					Engie Italia SpA [100.0%]	ENGIE SA [100.0%]	45.0296	8.9723	exact	Voghera			Pavia	https://www.gem.wiki/Voghera_power_station	L100000400478	G100000400478	FR0010208488	1	381	381	19	2045	2085	2125
oil/gas	Canada	Americas	Northern America	West Windsor power plant	1			135.4	operating	1996		CC	NG					West Windsor Power [100.0%]	ENGIE SA	42.2807	-83.0876	exact	Windsor			Ontario	https://www.gem.wiki/West_Windsor_power_plant	L100000405257	G100000404228	FR0010208488	1	135.4	135.4	28	2036	2076	2116
oil/gas	Belgium	Europe	Western Europe	Wilmarsdonk Total power station	1			43	operating			GT	NG					Electrabel NV/SA [100%]	ENGIE SA [100.0%]	51.2717	4.3262	exact	Antwerp			Antwerp	https://www.gem.wiki/Wilmarsdonk_Total_power_station	L100000406371	G100000406279	FR0010208488	1	129		-99	40	80	120
oil/gas	Belgium	Europe	Western Europe	Wilmarsdonk Total power station	2			43	operating			GT	NG					Electrabel NV/SA [100%]	ENGIE SA [100.0%]	51.2717	4.3262	exact	Antwerp			Antwerp	https://www.gem.wiki/Wilmarsdonk_Total_power_station	L100000406371	G100000406278	FR0010208488	1	129		-99	40	80	120
oil/gas	Belgium	Europe	Western Europe	Wilmarsdonk Total power station	3			43	operating			GT	NG					Electrabel NV/SA [100%]	ENGIE SA [100.0%]	51.2717	4.3262	exact	Antwerp			Antwerp	https://www.gem.wiki/Wilmarsdonk_Total_power_station	L100000406371	G100000406277	FR0010208488	1	129	129	-99	40	80	120
oil/gas	Belgium	Europe	Western Europe	Zandvliet power station	1			386.2	operating	2005		CC	NG					Zandvliet Power NV [100%]	BASF Antwerpen NV [50.0%]; ENGIE SA [50.0%]	51.3689	4.26419	exact	Antwerp			Antwerp	https://www.gem.wiki/Zandvliet_Power_Station	L100000400038	G100000400038	FR0010208488	0.5	386.2	386.2	19	2045	2085	2125
oil/gas	Belgium	Europe	Western Europe	Zeebrugge 2 Fluxys power station	1			40	operating	1987		GT	NG					Electrabel NV/SA [100%]	ENGIE SA [100.0%]	51.3518	3.20869	exact	Bruges			West Flanders	https://www.gem.wiki/Zeebrugge_2_Fluxys_power_station	L100000400039	G100000400039	FR0010208488	1	40	40	37	2027	2067	2107
oil/gas	Belgium	Europe	Western Europe	Zelzate 2 Knippegroen power station	1			315	operating	2010		ST	NG/BFG					Electrabel NV/SA [100%]	ENGIE SA [100.0%]	51.1587	3.8068	exact	Gent			East Flanders	https://www.gem.wiki/Zelzate_2_Knippegroen_power_station	L100000407649	G100000409988	FR0010208488	1	315	315	14	2050	2090	2130
oil/gas	Belgium	Europe	Western Europe	Zwijndrecht Lanxess power station	1			58	operating	2010		CC	NG					Electrabel NV/SA [100%]	ENGIE SA [100.0%]	51.2382	4.3408	exact	Zwijndrecht			Antwerp	https://www.gem.wiki/Zwijndrecht_Lanxess_power_station	L100000400040	G100000400040	FR0010208488	1	58	58	14	2050	2090	2130
solar	United States	Americas	Northern America	ANSON Solar Center			Sand Fork Solar	200	operating	2021		PV						ENGIE		32.811	-99.9175	exact	Anson	Jones County		Texas	https://gem.wiki/ANSON_Solar_Center	L804456	G805123	FR0010208488	1	200	200	3	2061	2101	2141
solar	United States	Americas	Northern America	Azure Sky Solar				225	operating	2021		PV						ENGIE		33.02	-99.595	exact	Haskell	Haskell County		Texas	https://gem.wiki/Azure_Sky_Solar	L805049	G805820	FR0010208488	1	225	225	3	2061	2101	2141
solar	India	Asia	Southern Asia	Bhadla (Engie) Solar Park				190	operating	2018		PV						ENGIE		27.5182	71.9306	approximate	Bhadla		Jodhpur	Rajasthan	https://gem.wiki/Bhadla_(Engie)_Solar_Park	L800508	G800611	FR0010208488	1	190	190	6	2058	2098	2138
solar	United States	Americas	Northern America	Bluestone Solar				50	operating	2021		PV						ENGIE		36.8115	-78.4839	exact	Chase City	Mecklenburg County		Virginia	https://gem.wiki/Bluestone_Solar	L805050	G805821	FR0010208488	1	50	50	3	2061	2101	2141
solar	United States	Americas	Northern America	Five Wells Solar Center				355	construction	2023		PV						ENGIE		30.9986	-97.259	exact		Bell County		Texas	https://gem.wiki/Five_Wells_Solar_Center	L832896	G838513	FR0010208488	1	355	355	1	2063	2103	2143
solar	United States	Americas	Northern America	Flat Run Solar Project				55	pre-construction	2024		PV						ENGIE		37.3741	-85.353	approximate		Taylor County		Kentucky	https://gem.wiki/Flat_Run_Solar_Project	L832898	G838515	FR0010208488	1	55	55	0	2064	2104	2144
solar	United States	Americas	Northern America	Hopkins solar farm				250	pre-construction			PV						ENGIE		33.1225	-95.733	approximate		Hopkins County		Texas	https://gem.wiki/Hopkins_solar_farm	L804457	G805124	FR0010208488	1	250	250	-99	40	80	120
solar	United States	Americas	Northern America	Horseshoe Bend Solar Project				60	pre-construction	2024		PV						ENGIE		37.2644	-85.5717	approximate		Green County		Kentucky	https://gem.wiki/Horseshoe_Bend_Solar_Project	L832974	G838594	FR0010208488	1	60	60	0	2064	2104	2144
solar	India	Asia	Southern Asia	Kadapa (Engie) Ultra Mega Solar Park	1			200	operating	2019		PV						ENGIE		14.9185	78.2867	approximate			Kadapa	Andhra Pradesh	https://gem.wiki/Kadapa_(Engie)_Ultra_Mega_Solar_Park	L800509	G800612	FR0010208488	1	250		5	2059	2099	2139
solar	India	Asia	Southern Asia	Kadapa (Engie) Ultra Mega Solar Park	2			50	operating	2020		PV						ENGIE		14.9185	78.2867	approximate			Kadapa	Andhra Pradesh	https://gem.wiki/Kadapa_(Engie)_Ultra_Mega_Solar_Park	L800509	G800613	FR0010208488	1	250	250	4	2060	2100	2140
solar	United States	Americas	Northern America	Long Draw Solar			ENGIE Long Draw Solar	225	operating	2020		PV						ENGIE		32.7414	-101.622	exact		Borden County		Texas	https://gem.wiki/Long_Draw_Solar	L804458	G805125	FR0010208488	1	225	225	4	2060	2100	2140
solar	United States	Americas	Northern America	Mt. Olive Creek Solar Project				60	pre-construction	2024		PV						ENGIE		37.0133	-85.5058	approximate		Adair County		Kentucky	https://gem.wiki/Mt._Olive_Creek_Solar_Project	L833100	G838739	FR0010208488	1	60	60	0	2064	2104	2144
solar	United States	Americas	Northern America	Powells Creek (ENGIE) Solar				70	construction	2023		PV						ENGIE		36.5547	-79.0286	approximate		Halifax County		Virginia	https://gem.wiki/Powells_Creek_(ENGIE)_Solar	L808501	G810730	FR0010208488	1	70	70	1	2063	2103	2143
solar	United States	Americas	Northern America	Puako Solar				60	cancelled			PV						ENGIE		21.4747	-158.054	approximate		Hawai'i County		Hawaii	https://gem.wiki/Puako_Solar	L805051	G805822	FR0010208488	1	60	60	-99	40	80	120
solar	United States	Americas	Northern America	Ridgeview Solar				50	pre-construction	2026		PV						ENGIE		39.0314	-82.6289	approximate		Jackson County		Ohio	https://gem.wiki/Ridgeview_Solar	L833217	G838899	FR0010208488	1	50		-2	2066	2106	2146
solar	United States	Americas	Northern America	Salt City Solar Project				50	construction	2023		PV						ENGIE		39.4147	-82.9629	exact		Ross County		Ohio	https://gem.wiki/Salt_City_Solar_Project	L808519	G810751	FR0010208488	1	50		1	2063	2103	2143
solar	United States	Americas	Northern America	Solaire Holman Solar Project			Brewster solar farm, Hecate Alpine Mcgill	50	operating	2017		PV						ENGIE		30.4551	-103.475	exact		Brewster County		Texas	https://gem.wiki/Solaire_Holman_Solar_Project	L804460	G805127	FR0010208488	1	50		7	2057	2097	2137
solar	United States	Americas	Northern America	Solidago (ENGIE) Solar				50	operating	2022		PV						ENGIE		39.3952	-75.7535	exact		New Castle County		Delaware	https://gem.wiki/Solidago_(ENGIE)_Solar	L808534	G810778	FR0010208488	1	50	50	2	2062	2102	2142
solar	United States	Americas	Northern America	Sunnybrook Solar Project				51	operating	2022		PV						ENGIE		36.7987	-78.8396	approximate		Halifax County		Virginia	https://gem.wiki/Sunnybrook_Solar_Project	L808540	G810784	FR0010208488	1	51	51	2	2062	2102	2142
solar	United States	Americas	Northern America	Vermillion River_MN_GRE DEA-GM solar farm				3	operating	2019		PV						ENGIE Generation North America LLC [100.0%]		44.5998	-93.1361	exact	Farmington	Dakota		Minnesota	https://gem.wiki/Vermillion_River_MN_GRE_DEA-GM_solar_farm	L815552	G818426	FR0010208488	1	3	3	5	2059	2099	2139
solar	India	Asia	Southern Asia	Vijaypura (Engie) solar farm			Dada Kala (Mirzapur)	75	operating	2018		PV						ENGIE		25.1001	82.3619	exact		Mirzapur	Mirzapur District	Uttar Pradesh	https://gem.wiki/Vijaypura_(Engie)_solar_farm	L800510	G800614	FR0010208488	1	75	75	6	2058	2098	2138
solar	United States	Americas	Northern America	Whitehorn Solar				50	operating	2021		PV						ENGIE		36.9314	-79.3587	exact	Gretna	Pittsylvania County		Virginia	https://gem.wiki/Whitehorn_Solar	L805052	G805823	FR0010208488	1	50	50	3	2061	2101	2141
wind	Canada	Americas	Northern America	AIM SOP wind farm	Clear Creek			10	operating	2008		onshore						ENGIE		42.5863	-80.5532	exact					https://gem.wiki/AIM_SOP_wind_farm	L921828	G927111	FR0010208488	1	40		16	2048	2088	2128
wind	Canada	Americas	Northern America	AIM SOP wind farm	Cultus			10	operating	2008		onshore						ENGIE		42.5871	-80.5872	exact					https://gem.wiki/AIM_SOP_wind_farm	L921828	G927112	FR0010208488	1	40		16	2048	2088	2128
wind	Canada	Americas	Northern America	AIM SOP wind farm	Frogmore			10	operating	2008		onshore						ENGIE		42.5845	-80.5595	exact					https://gem.wiki/AIM_SOP_wind_farm	L921828	G927113	FR0010208488	1	40		16	2048	2088	2128
wind	Canada	Americas	Northern America	AIM SOP wind farm	Mohawk Point			10	operating	2008		onshore						ENGIE		42.862	-79.4907	exact					https://gem.wiki/AIM_SOP_wind_farm	L921828	G927114	FR0010208488	1	40	40	16	2048	2088	2128
wind	Italy	Europe	Southern Europe	Elimi wind farm				38	operating	2022		onshore						ENGIE		37.7832	12.7163	approximate					https://gem.wiki/Elimi_wind_farm	L920402	G925066	FR0010208488	1	38	38	2	2062	2102	2142
wind	Belgium	Europe	Western Europe	Hammont-Achel wind farm			Industriezone Bosstraat	14	pre-construction			onshore						ENGIE SA		51.245	5.5093	approximate					https://gem.wiki/Hammont-Achel_wind_farm	L919310	G923801	FR0010208488	1	14	14	-99	40	80	120
wind	United Kingdom	Europe	Northern Europe	Moray East wind farm				950	operating	2022		offshore hard mount						EDP Renewables; ENGIE; China Three Gorges CORP (CTG); Diamond Green LTD; INPEX CORP [16.7%]		58.188	-2.72	approximate				Scotland	https://gem.wiki/Moray_East_wind_farm	L916287	G920099	FR0010208488	0.2	950	950	2	2062	2102	2142
wind	United Kingdom	Europe	Northern Europe	Moray West wind farm				882	pre-construction	2024		offshore mount unknown						EDP Renewables [50%]; ENGIE [50%]		58.0699	-3.3131	exact					https://gem.wiki/Moray_West_wind_farm	L916288	G920100	FR0010208488	0.5	882	882	0	2064	2104	2144
wind	India	Asia	Southern Asia	Tihitwa wind farm				30	operating	2017		onshore						ENGIE		22.8177	70.8346	approximate		Tithwa	Morbi	Gujarat	https://gem.wiki/Tihitwa_wind_farm	L900316	G900382	FR0010208488	1	30	30	7	2057	2097	2137
wind	India	Asia	Southern Asia	Tuticorin (Engie) wind farm				252	operating	2019		onshore						ENGIE		8.8053	78.1453	approximate			Tuticorin	Tamil Nadu	https://gem.wiki/Tuticorin_(Engie)_wind_farm	L900317	G900383	FR0010208488	1	252	252	5	2059	2099	2139

## Sheet: Factors
Fuel Type	Capacity factor 2021	Capacity factor 2022	CF2020	CF2021	CF2022	CF2023		Engie SA - annual report 2021	https://www.engie.com/sites/default/files/assets/documents/2022-02/ENGIE_2021_Management_report_and_annual_consolidated_financial_statements.pdf
Coal-hard	0.583681	0.499713	0.4153	0.752063	0.566382	0.433044		Engie SA - annual report 2022	https://www.engie.com/sites/default/files/assets/documents/2023-02/ENGIE_2022%20Management%20report%20and%20annual%20consolidated%20financial%20statements.pdf		p14	ENGIE is committed to exiting all coal assets in continental Europe by 2025 and globally by 2027, including coal generation for district heating and cooling networks.	In 2022, greenhouse gas emissions from energy production were reduced to 60 million tons, a decrease of 44% compared to 2017, and in line with the target of 43 million tons by 2030. 2022 results were positively impacted by the weather and a lower utilization rate of our CCGTs.
Lignite	0	0	0	0	0	0					p10	ENGIE has set an ambitious target by 2030 to: • develop green hydrogen production capacity of 4 GW, • have 700 km dedicated hydrogen networks and 1 TWh of storage capacity, • operate more than 100 refuelling stations
Oil	0.151926	0.20434	0.103825	0.200028	0.244559	0.164121
Gas	0.469342	0.451287	0.460441	0.478243	0.481739	0.420835
Fuel Type	Heat rate (Btu per kWh) 2022
Coal	10689							CDP C-EU8.2d 2021
Petroleum	11166							Energy Source Type	Nameplate capacity (MW)	Gross electricity generation (GWh)	Net electricity generation (GWh)	Absolute scope 1 emissions (metric tons CO2e)	Scope 1 emissions intensity (metric tons CO2e per GWh)		Capacity factor (gross)	Capacity factor (net)
Natural Gas	7740							Coal – hard	2072	11528	10576	10193719	964		0.635126	0.582677
Nuclear	10448							Lignite	0	0	0	0	0
								Oil	1870	903	894	629145	704		0.0551242	0.0545748
Fuel Type	Emission factors (kg of CO2 per TJ) US		Fuel Type	Emission factors (kg of CO2 per TJ) IPCC2006				Gas	24733	60758	59334	23095691	389	33601	0.280429	0.273856
Bituminous Coal	88374.7		Crude Oil	73300				Sustainable biomass	2864	5671	5598	0	0	73189	0.226039	0.223129
Distillate Oil	70271.4		Natural Gas Liquids	64200				Other biomass	0	0	0	0	0
Jet Fuel	68461		Coking Coal	94600				Waste (non-biomass)	69	287	283	85536	302		0.47482	0.468202
Kerosene	69370.9		Other Bituminous Coal	94600				Nuclear	5942	50764	47891	0	0		0.975257	0.920062
Lignite Coal	93142.3		Sub-Bituminous Coal	96100				Fossil-fuel plants fitted with CCS	0	0	0	0	0
Municipal Solid Waste	47286.7		Lignite	101000				Geothermal	69	183	178	0	0		0.30276	0.294487
Natural Gas	50149.2		Coke	107000				Hydropower	10630	40490	39311	0	0		0.434821	0.42216
Petroleum Coke	96791.4		Gas/Diesel Oil	74100				Wind	5675	14570	14383	0	0		0.293082	0.289321
Propane Gas	59598.9		Residual Fuel Oil	77400				Solar	2574	3089	3049	0	0		0.136995	0.135221
Refined Coal	88374.7		Natural Gas	56100				Marine	0	0	0	0	0
Residual Fuel Oil	71171.8		Natural Gas Liquids	64200				Other renewable	0	0	0	0	0
Subbituminous Coal	92061.8		Wood / Wood Waste	112000				Other non-renewable	4926	6360	6000	1217591	203		0.147387	0.139044
Tire-Derived Fuel	81484.1		Charcoal	112000				Total	61424	194603	187497	35221682	187		0.361666	0.348459
Waste Coal	88374.7		Industrial Wastes	143000
Waste Oil	70138.7		Waste Oils	73300				Category	Capacity FY 2020 (GW)	Capacity FY 2021 (GW)	Capacity FY 2022 (GW)	Capacity FY 2023 (GW)	Production FY 2020 (TWh)	Production FY 2021 (TWh)	Production FY 2022 (TWh)	Production FY 2023 (TWh)	CF 2020	CF 2021	CF 2022	CF2023
Fuel Type	Emission factors (kg of CO2 per MMBTU) US		Fuel Type	Emission factors (kg of CO2 per MMBTU) IPCC2006				Gas contracted	35.9	34.8	34.8	34.2	194	202.7	199.3	186.5	0.616884	0.664922	0.653768	0.622513
Bituminous Coal	93.24		Crude Oil	77.3354				Coal contracted	4.2	2.2	2.2	2.1	17.8	17.9	13.1	9.8	0.483801	0.928809	0.679743	0.532725
Distillate Oil	74.14		Natural Gas Liquids	67.7344				Gas merchant	16.5	15.2	15.1	15	47.1	40.6	43.5	31.5	0.325861	0.304915	0.328858	0.239726
Jet Fuel	72.23		Coking Coal	99.808				Coal merchant	0	0.7	0.2	0	0	1.4	0.7	0		0.228311	0.399543
Kerosene	73.19		Other Bituminous Coal	99.808				Pumped storage	3.4	3.3	3.3	3.3	2.5	2.5	2.9	2.3	0.0839377	0.0864813	0.100318	0.0795628
Lignite Coal	98.27		Sub-Bituminous Coal	101.391				Other	3.5	3.8	3.9	3.8	4.6	6.2	6.9	5	0.150033	0.186253	0.201967	0.150204
Municipal Solid Waste	49.89		Lignite	106.56				Coal	4.2	2.9	2.4	2.1	17.8	19.3	13.8	9.8	0.483801	0.759723	0.656393	0.532725
Natural Gas	52.91		Coke	112.891				Gas	52.4	50	49.9	49.2	241.1	243.3	242.8	218	0.525245	0.555479	0.555449	0.50581
Petroleum Coke	102.12		Gas/Diesel Oil	78.1794				Total	63.6	59.9	59.5	59	271.4	271.4	266.4	235.3	0.487134	0.517224	0.511109	0.455267
Propane Gas	62.88		Residual Fuel Oil	81.6611			2022	https://www.engie.com/sites/default/files/assets/documents/2023-02/ENGIE%20FY%202022%20Databook%20PDF.pdf	40.1	37	37	36.3
Refined Coal	93.24		Natural Gas	59.1885			2023	https://www.engie.com/sites/default/files/assets/documents/2024-02/ENGIE%20FY%202023%20Databook%20VDEF.pdf
Residual Fuel Oil	75.09		Natural Gas Liquids	67.7344			2021	https://www.engie.com/sites/default/files/assets/documents/2022-02/ENGIE%20FY%202021%20Databook%20VDEF.pdf
Subbituminous Coal	97.13		Wood / Wood Waste	118.166			2020	https://www.engie.com/sites/default/files/assets/documents/2021-03/ENGIE%20DATABOOK%20FY%202020%20VDEF.pdf
Tire-Derived Fuel	85.97		Charcoal	118.166				Net ownership	Capacity FY 2020 (GW)	Capacity FY 2021 (GW)	Capacity FY 2022 (GW)	Capacity FY 2023 (GW)	Production FY 2020 (TWh)	Production FY 2021 (TWh)	Production FY 2022 (TWh)	Production FY 2023 (TWh)	CF 2020	CF 2021	CF 2022	CF2023	Average	CF2020_21	CF2022_23
Waste Coal	93.24		Industrial Wastes	150.873				Natural gas	25162	23631	23578	23491	101.49	99	99.5	86.6	0.460441	0.478243	0.481739	0.420835	0.460315	0.469342	0.451287
Waste Oil	74		Waste Oils	77.3354				Coal	2188	1442	1169	949	7.96	9.5	5.8	3.6	0.4153	0.752063	0.566382	0.433044	0.541697	0.583681	0.499713
								Other non renewable	2188	2454	2754	2504	1.99	4.3	5.9	3.6	0.103825	0.200028	0.244559	0.164121	0.178133	0.151926	0.20434
								In % of consolidation
								Natural gas	25953	24639	24549	24256	105.28	103.5	103.6	91.2	0.463078	0.479527	0.48175	0.429212	0.463392	0.471303	0.455481
								Coal	3165	2076	1625	1303	11.2	12.9	7.3	4.1	0.403962	0.709346	0.512821	0.359199	0.496332	0.556654	0.43601
								Other non renewable	2532	2920	3258	2970	2.24	4.4	6.1	3.8	0.10099	0.172015	0.213735	0.146057	0.158199	0.136503	0.179896
								At 100%
								Natural gas	52520	49973	49890	49214	241.18	243.3	242.8	218.1	0.524219	0.55578	0.55556	0.505898	0.535364	0.539999	0.530729
								Coal	4040	2910	2459	2137	19.45	19.3	13.8	9.8	0.549584	0.757112	0.640644	0.523501	0.61771	0.653348	0.582072
								Other non renewable	3030	3542	3879	3592	3.89	5.1	6.9	4.8	0.146556	0.164368	0.20306	0.152546	0.166633	0.155462	0.177803
									29538	27527	27501	26944
								A significant development of renewable power generation, from 31 GW in 2020 to 80 GW in 2030, driven by massive solar and wind capacity developments in Europe, North America and Latin America.
								ENGIE will favor carbon offset projects close to its activities, which remove carbon from the atmosphere (e.g. nature-based solutions, CCUS), and which are of high quality in terms of carbon standards, co-benefits, and additionality.

## Sheet: Engie_BAU
Type	Country/area	Region	Subregion	Plant / Project name	Unit / Phase name	Plant / Project name (local)	Plant / Project name (other)	Capacity (MW)	Status	Start year	Retired year	Technology	Fuel	Country/area 1 (hydropower only)	Country/area 2 (hydropower only)	Country/area 1 Capacity (MW) (hydropower only)	Country/area 2 Capacity (MW) (hydropower only)	Owner	Parent	Latitude	Longitude	Location accuracy	City	Local area (taluk, county)	Major area (prefecture, district)	Subnational unit (state, province)	GEM.Wiki URL	GEM location ID	GEM unit/phase ID	CompISIN	Ownership	Plant capacity	Plant capacity	Age	Reinvestment year	Reinvestment year	Reinvestment year	2020	2021	2022	2023	2024	2025	2026	2027	2028	2029	2030	2031
coal	Chile	Americas	Latin America and the Caribbean	Andina-Hornitos power station	Unit 1	Termoeléctrica Andina-Hornitos	Andina power station (Unit 1), Central Termoeléctrica Andina (CTA) (Unit 1), Central Termoeléctrica Hornitos (CTH) (Unit 2), Hornitos power station (Unit 2)	177	operating	2011	2025	CFB	bituminous					ENGIE Energía Chile [100%]	ENGIE Energía Chile [100.0%]	-23.0877	-70.4075	exact	Mejillones			Antofagasta Region	https://www.gem.wiki/Andina-Hornitos_power_station	L100000100181	G100000100194	FR0010208488	1	355		13	2051	2091	2131	177	177	177	177	177	177	177	177	177	177	177	177
coal	Chile	Americas	Latin America and the Caribbean	Andina-Hornitos power station	Unit 2	Termoeléctrica Andina-Hornitos	Andina power station (Unit 1), Central Termoeléctrica Andina (CTA) (Unit 1), Central Termoeléctrica Hornitos (CTH) (Unit 2), Hornitos power station (Unit 2)	178	operating	2012	2025	CFB	bituminous					ENGIE Energía Chile [100%]	ENGIE Energía Chile [100.0%]	-23.0877	-70.4075	exact	Mejillones			Antofagasta Region	https://www.gem.wiki/Andina-Hornitos_power_station	L100000100181	G100000100195	FR0010208488	1	355	355	12	2052	2092	2132	178	178	178	178	178	178	178	178	178	178	178	178
coal	France	Europe	Western Europe	Goro power station	Unit 1			50	operating	2008	2025	subcritical	unknown					Prony Énergies [100%]	ENERCAL SA [75.0%]; ENGIE SA [25.0%]	-22.3302	166.912	exact	Goro	Le Mont-Dore Municipality	Sud	New Caledonia	https://www.gem.wiki/Goro_power_station	L100000104548	G100000114107	FR0010208488	0.25	100		16	2048	2088	2128	12.5	12.5	12.5	12.5	12.5	12.5	12.5	12.5	12.5	12.5	12.5	12.5
coal	France	Europe	Western Europe	Goro power station	Unit 2			50	operating	2008	2025	subcritical	unknown					Prony Énergies [100%]	ENERCAL SA [75.0%]; ENGIE SA [25.0%]	-22.3302	166.912	exact	Goro	Le Mont-Dore Municipality	Sud	New Caledonia	https://www.gem.wiki/Goro_power_station	L100000104548	G100000114108	FR0010208488	0.25	100	100	16	2048	2088	2128	12.5	12.5	12.5	12.5	12.5	12.5	12.5	12.5	12.5	12.5	12.5	12.5
coal	Peru	Americas	Latin America and the Caribbean	Ilo power station	Unit 1	Central Termoeléctrica de Ilo	Ilo 21	135	retired	1999	2022	subcritical	bituminous					ENGIE Energía Perú [100%]	ENGIE Energía Perú [100.0%]	-17.776	-71.1893	exact	Ilo	Pacocha	Ilo	Moquegua	https://www.gem.wiki/Ilo_power_station	L100000103158	G100000104832	FR0010208488	1	1425	1425	25	2039	2079	2119	135	135	0	0	0	0	0	0	0	0	0	0
coal	Chile	Americas	Latin America and the Caribbean	Mejillones power station	Unit 1	Termoeléctrica Mejillones	Infraestructura Energética de Mejillones, IEM1 (Unit 4), IEM2 (Unit 5), Red Dragon (Unit 4, Unit 5)	160	operating	1996	2024	subcritical	bituminous					ENGIE Energía Chile [100%]	ENGIE Energía Chile [100.0%]	-23.0892	-70.4103	exact	Mejillones		Antofagasta	Antofagasta Region	https://www.gem.wiki/Mejillones_power_station	L100000100184	G100000106831	FR0010208488	1	1329		28	2036	2076	2116	160	160	160	160	160	160	160	160	160	160	160	160
coal	Chile	Americas	Latin America and the Caribbean	Mejillones power station	Unit 2	Termoeléctrica Mejillones	Infraestructura Energética de Mejillones, IEM1 (Unit 4), IEM2 (Unit 5), Red Dragon (Unit 4, Unit 5)	174	operating	1998	2024	subcritical	bituminous					ENGIE Energía Chile [100%]	ENGIE Energía Chile [100.0%]	-23.0892	-70.4103	exact	Mejillones		Antofagasta	Antofagasta Region	https://www.gem.wiki/Mejillones_power_station	L100000100184	G100000106832	FR0010208488	1	1329		26	2038	2078	2118	174	174	174	174	174	174	174	174	174	174	174	174
coal	Chile	Americas	Latin America and the Caribbean	Mejillones power station	Unit 4	Termoeléctrica Mejillones	Infraestructura Energética de Mejillones, IEM1 (Unit 4), IEM2 (Unit 5), Red Dragon (Unit 4, Unit 5)	375	operating	2019	2025	subcritical	bituminous					ENGIE Energía Chile [100%]	ENGIE Energía Chile [100.0%]	-23.0892	-70.4103	exact	Mejillones		Antofagasta	Antofagasta Region	https://www.gem.wiki/Mejillones_power_station	L100000100184	G100000106833	FR0010208488	1	1329	1329	5	2059	2099	2139	375	375	375	375	375	375	375	375	375	375	375	375
coal	Portugal	Europe	Southern Europe	Pego power station	Unit 1			341	retired	1992	2021	subcritical	bituminous					Tejo Energia [100%]	Endesa SA [43.8%]; ENGIE SA [28.1%]; Marubeni Corp [28.1%]	39.4682	-8.10923	exact	Pego	Abrantes	Médio Tejo	Santarém	https://www.gem.wiki/Pego_power_station	L100000103283	G100000107913	FR0010208488	0.281	682		32	2032	2072	2112	95.821	0	0	0	0	0	0	0	0	0	0	0
coal	Portugal	Europe	Southern Europe	Pego power station	Unit 2			341	retired	1995	2021	subcritical	bituminous					Tejo Energia [100%]	Endesa SA [43.8%]; ENGIE SA [28.1%]; Marubeni Corp [28.1%]	39.4682	-8.10923	exact	Pego	Abrantes	Médio Tejo	Santarém	https://www.gem.wiki/Pego_power_station	L100000103283	G100000107914	FR0010208488	0.281	682	682	29	2035	2075	2115	95.821	0	0	0	0	0	0	0	0	0	0	0
coal	Morocco	Africa	Northern Africa	Safi power station	Unit 1			693	operating	2018		ultra-supercritical	unknown					Safi Energy Company [100%]	ENGIE SA [35.0%]; Nareva Holding SA [35.0%]; Mitsui & Co Ltd [30.0%]	32.1491	-9.28229	exact	Cap Ghir Safi			Souss-Massa	https://www.gem.wiki/Safi_power_station	L100000103053	G100000108700	FR0010208488	0.35	1386		6	2058	2098	2138	242.55	242.55	242.55	242.55	242.55	242.55	242.55	242.55	242.55	242.55	242.55	242.55
coal	Morocco	Africa	Northern Africa	Safi power station	Unit 2			693	operating	2018		ultra-supercritical	unknown					Safi Energy Company [100%]	ENGIE SA [35.0%]; Nareva Holding SA [35.0%]; Mitsui & Co Ltd [30.0%]	32.1491	-9.28229	exact	Cap Ghir Safi			Souss-Massa	https://www.gem.wiki/Safi_power_station	L100000103053	G100000108701	FR0010208488	0.35	1386	1386	6	2058	2098	2138	242.55	242.55	242.55	242.55	242.55	242.55	242.55	242.55	242.55	242.55	242.55	242.55
coal	Chile	Americas	Latin America and the Caribbean	Tocopilla power station	Unit 14	Termoeléctrica Tocopilla		136	retired	1987	2022	subcritical	subbituminous					ENGIE Energía Chile [100%]	ENGIE Energía Chile [100.0%]	-22.0964	-70.2118	exact	Tocopilla		Tocopilla	Antofagasta Region	https://www.gem.wiki/Tocopilla_power_station	L100000100186	G100000110211	FR0010208488	1	662		37	2027	2067	2107	136	136	0	0	0	0	0	0	0	0	0	0
coal	Chile	Americas	Latin America and the Caribbean	Tocopilla power station	Unit 15	Termoeléctrica Tocopilla		132	retired	1990	2022	subcritical	subbituminous					ENGIE Energía Chile [100%]	ENGIE Energía Chile [100.0%]	-22.0964	-70.2118	exact	Tocopilla		Tocopilla	Antofagasta Region	https://www.gem.wiki/Tocopilla_power_station	L100000100186	G100000110212	FR0010208488	1	662	662	34	2030	2070	2110	132	132	0	0	0	0	0	0	0	0	0	0
oil/gas	Belgium	Europe	Western Europe	Aalst Syral power station	1			48	operating	2000		CC	NG					Electrabel NV/SA [100%]	ENGIE SA [100.0%]	50.9355	4.04516	exact	Aalst			East Flanders	https://www.gem.wiki/Aalst_Syral_power_station	L100000400016	G100000400016	FR0010208488	1	48	48	24	2040	2080	2120	48	48	48	48	48	48	48	48	48	48	48	48
oil/gas	Bahrain	Asia	Western Asia	Al Ezzel power station	CC1	محطة العزل لإنتاج الكهرباء	El Ezzel CCGT Power Plant Bahrain	471	operating	2007		CC	NG					Al Ezzel Power Company BSC [100.0%]	ENGIE SA [45.0%]; Gulf Investment Corp [45.0%]; Social Insurance Organization (Bahrain)	26.2175	50.6595	exact	Al Hidd			Muharraq	https://www.gem.wiki/Al_Ezzel_power_station	L100000405455	G100000404587	FR0010208488	0.45	942		17	2047	2087	2127	211.95	211.95	211.95	211.95	211.95	211.95	211.95	211.95	211.95	211.95	211.95	211.95
oil/gas	Bahrain	Asia	Western Asia	Al Ezzel power station	CC2	محطة العزل لإنتاج الكهرباء	El Ezzel CCGT Power Plant Bahrain	471	operating	2007		CC	NG					Al Ezzel Power Company BSC [100.0%]	ENGIE SA [45.0%]; Gulf Investment Corp [45.0%]; Social Insurance Organization (Bahrain)	26.2175	50.6595	exact	Al Hidd			Muharraq	https://www.gem.wiki/Al_Ezzel_power_station	L100000405455	G100000404588	FR0010208488	0.45	942	942	17	2047	2087	2127	211.95	211.95	211.95	211.95	211.95	211.95	211.95	211.95	211.95	211.95	211.95	211.95
oil/gas	Bahrain	Asia	Western Asia	Al Hidd Power and Water Station	1	محطة الحد لإنتاج الكهرباء	Al Hidd power plant/Al-Hidd IWPP	987	operating	2003		CC	NG					Hidd Power Company BSC [100.0%]	Malakoff Corporation Bhd [40.0%]; ENGIE SA [30.0%]; Sumitomo Corp [30.0%]	26.2223	50.6621	exact	Al Hidd			Muharraq	https://www.gem.wiki/Al_Hidd_Power_and_Water_Station	L100000405457	G100000404589	FR0010208488	0.3	987	987	21	2043	2083	2123	296.1	296.1	296.1	296.1	296.1	296.1	296.1	296.1	296.1	296.1	296.1	296.1
oil/gas	Belgium	Europe	Western Europe	Amercoeur power station	1			451	operating	2010		CC	NG					Electrabel NV/SA [100%]	ENGIE SA [100.0%]	50.4304	4.3955	exact	Roux			Hainaut	https://www.gem.wiki/Amercoeur_power_station	L100000100087	G100000400017	FR0010208488	1	771		14	2050	2090	2130	451	451	451	451	451	451	451	451	451	451	451	451
oil/gas	Belgium	Europe	Western Europe	Amercoeur power station	2			320	shelved	2025		GT	NG					Electrabel NV/SA [100%]	ENGIE SA [100.0%]	50.4304	4.3955	exact	Roux			Hainaut	https://www.gem.wiki/Amercoeur_power_station	L100000100087	G100000406282	FR0010208488	1	771	771	-1	2065	2105	2145	0	0	0	0	0	0	0	0	0	0	0	0
oil/gas	Italy	Europe	Southern Europe	Arkema Marghera power station	1			20	operating	2013		ST	NG					Engie Servizi SpA [100.0%]	ENGIE SA [100.0%]	45.4502	12.2259	exact	Porto Marghera			Venice	https://www.gem.wiki/Arkema_Marghera_power_station	L100000400343	G100000400343	FR0010208488	1	20	20	11	2053	2093	2133	20	20	20	20	20	20	20	20	20	20	20	20
oil/gas	United States	Americas	Northern America	Astoria Energy II power station	CC1			650	operating	2011		CC	NG/FO					Astoria Energy II LLC [100.0%]	Algemene Pensioen Groep NV; Bank HaPoalim; Clal Insurance Enterprises Holdings Ltd; ENGIE SA; Harbert-managed funds; IDB Development Group; Munich RE Co; SNC-Lavalin; other	40.7813	-73.8966	exact	Astoria	Queens		New York	https://www.gem.wiki/Astoria_Energy_II_power_station	L100000401729	G100000402047	FR0010208488	0.111111	650	650	13	2051	2091	2131	72.2222	72.2222	72.2222	72.2222	72.2222	72.2222	72.2222	72.2222	72.2222	72.2222	72.2222	72.2222
oil/gas	South Africa	Africa	Sub-Saharan Africa	Avon power station	1			167.5	operating	2016		GT	NG/D					Avon Peaking Power (RF) Pty Ltd [100.0%]	ENGIE SA [38.0%]; Legend Power Solutions Pty Ltd [27.0%]; Mitsui & Co Ltd [25.0%]; The Peaker Trust [10.0%]	-29.4189	31.1577	exact	Ballito			KwaZulu-Natal	https://www.gem.wiki/Avon_power_station	L100000407110	G100000408559	FR0010208488	0.38	670		8	2056	2096	2136	63.65	63.65	63.65	63.65	63.65	63.65	63.65	63.65	63.65	63.65	63.65	63.65
oil/gas	South Africa	Africa	Sub-Saharan Africa	Avon power station	2			167.5	operating	2016		GT	NG/D					Avon Peaking Power (RF) Pty Ltd [100.0%]	ENGIE SA [38.0%]; Legend Power Solutions Pty Ltd [27.0%]; Mitsui & Co Ltd [25.0%]; The Peaker Trust [10.0%]	-29.4189	31.1577	exact	Ballito			KwaZulu-Natal	https://www.gem.wiki/Avon_power_station	L100000407110	G100000414451	FR0010208488	0.38	670		8	2056	2096	2136	63.65	63.65	63.65	63.65	63.65	63.65	63.65	63.65	63.65	63.65	63.65	63.65
oil/gas	South Africa	Africa	Sub-Saharan Africa	Avon power station	3			167.5	operating	2016		GT	NG/D					Avon Peaking Power (RF) Pty Ltd [100.0%]	ENGIE SA [38.0%]; Legend Power Solutions Pty Ltd [27.0%]; Mitsui & Co Ltd [25.0%]; The Peaker Trust [10.0%]	-29.4189	31.1577	exact	Ballito			KwaZulu-Natal	https://www.gem.wiki/Avon_power_station	L100000407110	G100000414450	FR0010208488	0.38	670		8	2056	2096	2136	63.65	63.65	63.65	63.65	63.65	63.65	63.65	63.65	63.65	63.65	63.65	63.65
oil/gas	South Africa	Africa	Sub-Saharan Africa	Avon power station	4			167.5	operating	2016		GT	NG/D					Avon Peaking Power (RF) Pty Ltd [100.0%]	ENGIE SA [38.0%]; Legend Power Solutions Pty Ltd [27.0%]; Mitsui & Co Ltd [25.0%]; The Peaker Trust [10.0%]	-29.4189	31.1577	exact	Ballito			KwaZulu-Natal	https://www.gem.wiki/Avon_power_station	L100000407110	G100000414449	FR0010208488	0.38	670	670	8	2056	2096	2136	63.65	63.65	63.65	63.65	63.65	63.65	63.65	63.65	63.65	63.65	63.65	63.65
oil/gas	Germany	Europe	Western Europe	Barmen power station	GT1		Wuppertal-Barmen	34	mothballed	1978		GT	NG/HFO					WSW Energie & Wasser AG [100.0%]	WSW Wuppertaler Stadtwerke GmbH [66.9%]; ENGIE SA [33.1%]	51.2689	7.2003	exact	Wuppertal			Nordrhein-Westfalen	https://www.gem.wiki/Barmen_power_station	L100000400114	G100000412908	FR0010208488	0.331	156		46	2018	2058	2098	0	0	0	0	0	0	0	0	0	0	0	0
oil/gas	Germany	Europe	Western Europe	Barmen power station	GT2		Wuppertal-Barmen	34	mothballed	1978		GT	NG/HFO					WSW Energie & Wasser AG [100.0%]	WSW Wuppertaler Stadtwerke GmbH [66.9%]; ENGIE SA [33.1%]	51.2689	7.2003	exact	Wuppertal			Nordrhein-Westfalen	https://www.gem.wiki/Barmen_power_station	L100000400114	G100000412907	FR0010208488	0.331	156		46	2018	2058	2098	0	0	0	0	0	0	0	0	0	0	0	0
oil/gas	Germany	Europe	Western Europe	Barmen power station	CC1		Wuppertal-Barmen	88	operating	2005		CC	NG					WSW Energie & Wasser AG [100.0%]	WSW Wuppertaler Stadtwerke GmbH [66.9%]; ENGIE SA [33.1%]	51.2689	7.2003	exact	Wuppertal			Nordrhein-Westfalen	https://www.gem.wiki/Barmen_power_station	L100000400114	G100000400114	FR0010208488	0.331	156	156	19	2045	2085	2125	29.128	29.128	29.128	29.128	29.128	29.128	29.128	29.128	29.128	29.128	29.128	29.128
oil/gas	Belgium	Europe	Western Europe	Beerse power station	IC			33	operating			ICCC	HFO					Electrabel NV/SA	ENGIE SA	51.3261	4.853	exact					https://www.gem.wiki/Beerse_power_station	L100001000036	G100001000101	FR0010208488	1	33	33	-99	40	80	120	33	33	33	33	33	33	33	33	33	33	33	33
oil/gas	Netherlands	Europe	Western Europe	Bergum power station	10GT			72	operating	2019		GT	NG					Engie Energie Nederland NV [100%]	ENGIE SA [100.0%]	53.2097	6.02959	exact	Bergum			Friesland	https://www.gem.wiki/Bergum_power_station	L100000400499	G100000409942	FR0010208488	1	808		5	2059	2099	2139	72	72	72	72	72	72	72	72	72	72	72	72
oil/gas	Netherlands	Europe	Western Europe	Bergum power station	20GT			72	operating	2019		GT	NG					Engie Energie Nederland NV [100%]	ENGIE SA [100.0%]	53.2097	6.02959	exact	Bergum			Friesland	https://www.gem.wiki/Bergum_power_station	L100000400499	G100000409941	FR0010208488	1	808		5	2059	2099	2139	72	72	72	72	72	72	72	72	72	72	72	72
oil/gas	Netherlands	Europe	Western Europe	Bergum power station	10			332	mothballed			CC	NG					Engie Energie Nederland NV [100%]	ENGIE SA [100.0%]	53.2097	6.02959	exact	Bergum			Friesland	https://www.gem.wiki/Bergum_power_station	L100000400499	G100000400499	FR0010208488	1	808		-99	40	80	120	0	0	0	0	0	0	0	0	0	0	0	0
oil/gas	Netherlands	Europe	Western Europe	Bergum power station	20			332	mothballed			CC	NG					Engie Energie Nederland NV [100%]	ENGIE SA [100.0%]	53.2097	6.02959	exact	Bergum			Friesland	https://www.gem.wiki/Bergum_power_station	L100000400499	G100000400500	FR0010208488	1	808	808	-99	40	80	120	0	0	0	0	0	0	0	0	0	0	0	0
oil/gas	Belgium	Europe	Western Europe	Beveren Ineos Phenolchemie power station	1			23.8	operating	1993		GT	NG					Electrabel NV/SA [100%]	ENGIE SA [100.0%]	51.2909	4.27025	exact	Beveren			East Flanders	https://www.gem.wiki/Beveren_Ineos_Phenolchemie_power_station	L100000400023	G100000400023	FR0010208488	1	23.8	23.8	31	2033	2073	2113	23.8	23.8	23.8	23.8	23.8	23.8	23.8	23.8	23.8	23.8	23.8	23.8
oil/gas	Italy	Europe	Southern Europe	Boffalora power station	1			88	operating	1988		CC	NG					Engie Servizi SpA [100.0%]	ENGIE SA [100.0%]	45.456	8.79646	approximate	Boffalora Sopra Ticino			Milan	https://www.gem.wiki/Boffalora_power_station	L100000400352	G100000400352	FR0010208488	1	88	88	36	2028	2068	2108	88	88	88	88	88	88	88	88	88	88	88	88
oil/gas	United States	Americas	Northern America	Calumet Energy Team power station	CT11			156	operating	2002		GT	NG					Engie North America [100.0%]	ENGIE SA [100.0%]	41.6835	-87.5563	exact	Chicago	Cook		Illinois	https://www.gem.wiki/Calumet_Energy_Team_power_station	L100000401565	G100000402272	FR0010208488	1	312		22	2042	2082	2122	156	156	156	156	156	156	156	156	156	156	156	156
oil/gas	United States	Americas	Northern America	Calumet Energy Team power station	CT12			156	operating	2002		GT	NG					Engie North America [100.0%]	ENGIE SA [100.0%]	41.6835	-87.5563	exact	Chicago	Cook		Illinois	https://www.gem.wiki/Calumet_Energy_Team_power_station	L100000401565	G100000402273	FR0010208488	1	312	312	22	2042	2082	2122	156	156	156	156	156	156	156	156	156	156	156	156
oil/gas	Italy	Europe	Southern Europe	Castelmassa power station	1			54	operating	1994		CC	NG					Engie Servizi SpA [100.0%]	ENGIE SA [100.0%]	45.0213	11.3116	exact	Castelmassa			Rovigo	https://www.gem.wiki/Castelmassa_power_station	L100000400364	G100000400364	FR0010208488	1	54	54	30	2034	2074	2114	54	54	54	54	54	54	54	54	54	54	54	54
oil/gas	Peru	Americas	Latin America and the Caribbean	Chilca power station	1	Central Termoeléctrica Chilca		852	operating	2012		CC	NG					ENGIE Energía Perú SA [100%]	ENGIE Energía Perú SA [100.0%]	-12.5024	-76.729	exact	Chilca		Cañete	Lima	https://gem.wiki/Chilca_power_station	L100000406603	G100000406665	FR0010208488	1	963		12	2052	2092	2132	852	852	852	852	852	852	852	852	852	852	852	852
oil/gas	Peru	Americas	Latin America and the Caribbean	Chilca power station	2	Central Termoeléctrica Chilca		111	operating	2016		CC	NG					ENGIE Energía Perú SA [100%]	ENGIE Energía Perú SA [100.0%]	-12.5024	-76.729	exact	Chilca		Cañete	Lima	https://gem.wiki/Chilca_power_station	L100000406603	G100000406666	FR0010208488	1	963	963	8	2056	2096	2136	111	111	111	111	111	111	111	111	111	111	111	111
oil/gas	France	Europe	Western Europe	Combigolfe power station	1	GRACIT01 - GROUPE 01 DE LA CENTRALE THERMIQUE DE GRACIEUSE (LA)		425	operating	2010		CC	NG					Engie Energy France [100.0%]	ENGIE SA [100.0%]	43.4072	4.8676	exact	Fos-sur-Mer			Bouches-du-Rhone	https://www.gem.wiki/Combigolfe_power_station	L100000400093	G100000400093	FR0010208488	1	425	425	14	2050	2090	2130	425	425	425	425	425	425	425	425	425	425	425	425
oil/gas	Belgium	Europe	Western Europe	Covestro Oorderen power station	1		Antwerp Bayer/Oorderen Bayer	43	operating			GT	NG					Electrabel NV/SA [100%]	ENGIE SA [100.0%]	51.297	4.31907	approximate	Antwerp			Antwerp	https://www.gem.wiki/Covestro_Oorderen_power_station	L100000406369	G100000406275	FR0010208488	1	43	43	-99	40	80	120	43	43	43	43	43	43	43	43	43	43	43	43
oil/gas	France	Europe	Western Europe	Cycofos power station	1			428	operating	2009		CC	NG					CyCoFos [100.0%]	ENGIE SA [100.0%]	43.428	4.88652	exact	Fos-sur-Mer			Bouches-du-Rhone	https://www.gem.wiki/Cycofos_power_station	L100000400095	G100000400095	FR0010208488	1	428	428	15	2049	2089	2129	428	428	428	428	428	428	428	428	428	428	428	428
oil/gas	South Africa	Africa	Sub-Saharan Africa	Dedisa power station	1			335	operating	2015		CC	NG/D					Dedisa Peaking Power (RF) Pty Ltd [100.0%]	ENGIE SA [38.0%]; Legend Power Solutions Pty Ltd [27.0%]; Mitsui & Co Ltd [25.0%]; The Peaker Trust [10.0%]	-33.7434	25.6728	exact	Gqeberha			Eastern Cape	https://www.gem.wiki/Dedisa_power_station	L100000407109	G100000408558	FR0010208488	0.38	335	335	9	2055	2095	2135	127.3	127.3	127.3	127.3	127.3	127.3	127.3	127.3	127.3	127.3	127.3	127.3
oil/gas	Belgium	Europe	Western Europe	Drogenbos power station	1			460	operating	1993		CC	NG					Electrabel NV/SA [100%]	ENGIE SA [100.0%]	50.8023	4.299	exact	Drogenbos			Flemish Brabant	https://www.gem.wiki/Drogenbos_power_station	L100000400024	G100000400024	FR0010208488	1	572		31	2033	2073	2113	460	460	460	460	460	460	460	460	460	460	460	460
oil/gas	Belgium	Europe	Western Europe	Drogenbos power station	ST			112	mothballed	1999		ST	HFO					Electrabel NV/SA [100%]	ENGIE SA [100.0%]	50.8023	4.299	exact	Drogenbos			Flemish Brabant	https://www.gem.wiki/Drogenbos_power_station	L100000400024	G100001000100	FR0010208488	1	572	572	25	2039	2079	2119	0	0	0	0	0	0	0	0	0	0	0	0
oil/gas	Australia	Oceania	Australia and New Zealand	Dry Creek GT power station	1			52	operating	1973	2030	GT	NG					Synergen Power Pty Ltd [100.0%]	ENGIE SA [72.0%]; Mitsui & Co Ltd [28.0%]	-34.8475	138.577	exact	Adelaide			South Australia	https://www.gem.wiki/Dry_Creek_GT_power_station	L100000405112	G100000401509	FR0010208488	0.72	156		51	2013	2053	2093	37.44	37.44	37.44	37.44	37.44	37.44	37.44	37.44	37.44	37.44	37.44	37.44
oil/gas	Australia	Oceania	Australia and New Zealand	Dry Creek GT power station	2			52	operating	1973	2030	GT	NG					Synergen Power Pty Ltd [100.0%]	ENGIE SA [72.0%]; Mitsui & Co Ltd [28.0%]	-34.8475	138.577	exact	Adelaide			South Australia	https://www.gem.wiki/Dry_Creek_GT_power_station	L100000405112	G100000401510	FR0010208488	0.72	156		51	2013	2053	2093	37.44	37.44	37.44	37.44	37.44	37.44	37.44	37.44	37.44	37.44	37.44	37.44
oil/gas	Australia	Oceania	Australia and New Zealand	Dry Creek GT power station	3			52	operating	1973	2030	GT	NG					Synergen Power Pty Ltd [100.0%]	ENGIE SA [72.0%]; Mitsui & Co Ltd [28.0%]	-34.8475	138.577	exact	Adelaide			South Australia	https://www.gem.wiki/Dry_Creek_GT_power_station	L100000405112	G100000401511	FR0010208488	0.72	156	156	51	2013	2053	2093	37.44	37.44	37.44	37.44	37.44	37.44	37.44	37.44	37.44	37.44	37.44	37.44
oil/gas	Netherlands	Europe	Western Europe	EEM power station	EC20	Eemscentrale		131	operating	1987		GT	NG					Engie Energie Nederland NV [100%]	ENGIE SA [100.0%]	53.4417	6.85605	exact	Eemshaven			Groningen	https://www.gem.wiki/EEM_power_station	L100000400513	G100000409939	FR0010208488	1	1931		37	2027	2067	2107	131	131	131	131	131	131	131	131	131	131	131	131
oil/gas	Netherlands	Europe	Western Europe	EEM power station	EC3	Eemscentrale		360	operating	1995		CC	NG					Engie Energie Nederland NV [100%]	ENGIE SA [100.0%]	53.4417	6.85605	exact	Eemshaven			Groningen	https://www.gem.wiki/EEM_power_station	L100000400513	G100000400513	FR0010208488	1	1931		29	2035	2075	2115	360	360	360	360	360	360	360	360	360	360	360	360
oil/gas	Netherlands	Europe	Western Europe	EEM power station	EC4	Eemscentrale		360	operating	1995		CC	NG					Engie Energie Nederland NV [100%]	ENGIE SA [100.0%]	53.4417	6.85605	exact	Eemshaven			Groningen	https://www.gem.wiki/EEM_power_station	L100000400513	G100000400514	FR0010208488	1	1931		29	2035	2075	2115	360	360	360	360	360	360	360	360	360	360	360	360
oil/gas	Netherlands	Europe	Western Europe	EEM power station	EC5	Eemscentrale		360	operating	1995		CC	NG					Engie Energie Nederland NV [100%]	ENGIE SA [100.0%]	53.4417	6.85605	exact	Eemshaven			Groningen	https://www.gem.wiki/EEM_power_station	L100000400513	G100000400515	FR0010208488	1	1931		29	2035	2075	2115	360	360	360	360	360	360	360	360	360	360	360	360
oil/gas	Netherlands	Europe	Western Europe	EEM power station	EC6	Eemscentrale		360	operating	1996		CC	NG					Engie Energie Nederland NV [100%]	ENGIE SA [100.0%]	53.4417	6.85605	exact	Eemshaven			Groningen	https://www.gem.wiki/EEM_power_station	L100000400513	G100000400516	FR0010208488	1	1931		28	2036	2076	2116	360	360	360	360	360	360	360	360	360	360	360	360
oil/gas	Netherlands	Europe	Western Europe	EEM power station	EC7	Eemscentrale		360	operating	1996		CC	NG					Engie Energie Nederland NV [100%]	ENGIE SA [100.0%]	53.4417	6.85605	exact	Eemshaven			Groningen	https://www.gem.wiki/EEM_power_station	L100000400513	G100000400517	FR0010208488	1	1931	1931	28	2036	2076	2116	360	360	360	360	360	360	360	360	360	360	360	360
oil/gas	Portugal	Europe	Southern Europe	Elecgas Pego power station	G3			418	operating	2011		CC	NG					ElecGas SA [100%]	Endesa SA [50.0%]; ENGIE SA [25.0%]; Marubeni Corp [25.0%]	39.4689	-8.1113	exact	Pego			Santarem	https://www.gem.wiki/Elecgas_Pego_power_station	L100000400584	G100000400584	FR0010208488	0.25	836		13	2051	2091	2131	104.5	104.5	104.5	104.5	104.5	104.5	104.5	104.5	104.5	104.5	104.5	104.5
oil/gas	Portugal	Europe	Southern Europe	Elecgas Pego power station	G4			418	operating	2011		CC	NG					ElecGas SA [100%]	Endesa SA [50.0%]; ENGIE SA [25.0%]; Marubeni Corp [25.0%]	39.4689	-8.1113	exact	Pego			Santarem	https://www.gem.wiki/Elecgas_Pego_power_station	L100000400584	G100000400585	FR0010208488	0.25	836	836	13	2051	2091	2131	104.5	104.5	104.5	104.5	104.5	104.5	104.5	104.5	104.5	104.5	104.5	104.5
oil/gas	Saudi Arabia	Asia	Western Asia	Fadhili cogeneration power plant	1	محطة الفاضلي لتوليد الطاقة المزدوج		1520	operating	2020		CC	NG					Fadhili Plant Cogeneration Co [100.0%]	ENGIE SA [40.0%]; Saudi Arabian Oil Co [30.0%]; Saudi Electricity Co [30.0%]	27.1123	49.0714	exact	Jubail Industrial City			Eastern	https://www.gem.wiki/Fadhili_cogeneration_power_plant	L100000405542	G100000404751	FR0010208488	0.4	1520	1520	4	2060	2100	2140	608	608	608	608	608	608	608	608	608	608	608	608
oil/gas	United Arab Emirates	Asia	Western Asia	Fujairah F2 Integrated Water and power plant	1	محطة الفجيرة F2	FAPCO (Fuj F2)/Qidfa F2 Gas Power Plant	867	operating	2011	2031	CC	NG					Fujairah Asia Power Company PJSC [100.0%]	Abu Dhabi National Energy Company PJSC [60.0%]; ENGIE SA [20.0%]; Marubeni Corp [20.0%]	25.3019	56.3704	exact	Qidfa			Fujairah	https://www.gem.wiki/Fujairah_F2_Integrated_Water_and_power_plant	L100000405577	G100000405012	FR0010208488	0.2	2166		13	2051	2091	2131	173.4	173.4	173.4	173.4	173.4	173.4	173.4	173.4	173.4	173.4	173.4	173.4
oil/gas	United Arab Emirates	Asia	Western Asia	Fujairah F2 Integrated Water and power plant	2	محطة الفجيرة F2	FAPCO (Fuj F2)/Qidfa F2 Gas Power Plant	432	operating	2011	2031	CC	NG					Fujairah Asia Power Company PJSC [100.0%]	Abu Dhabi National Energy Company PJSC [60.0%]; ENGIE SA [20.0%]; Marubeni Corp [20.0%]	25.3019	56.3704	exact	Qidfa			Fujairah	https://www.gem.wiki/Fujairah_F2_Integrated_Water_and_power_plant	L100000405577	G100000405013	FR0010208488	0.2	2166		13	2051	2091	2131	86.4	86.4	86.4	86.4	86.4	86.4	86.4	86.4	86.4	86.4	86.4	86.4
oil/gas	United Arab Emirates	Asia	Western Asia	Fujairah F2 Integrated Water and power plant	3	محطة الفجيرة F2	FAPCO (Fuj F2)/Qidfa F2 Gas Power Plant	867	operating	2011	2031	CC	NG					Fujairah Asia Power Company PJSC [100.0%]	Abu Dhabi National Energy Company PJSC [60.0%]; ENGIE SA [20.0%]; Marubeni Corp [20.0%]	25.3019	56.3704	exact	Qidfa			Fujairah	https://www.gem.wiki/Fujairah_F2_Integrated_Water_and_power_plant	L100000405577	G100000405014	FR0010208488	0.2	2166	2166	13	2051	2091	2131	173.4	173.4	173.4	173.4	173.4	173.4	173.4	173.4	173.4	173.4	173.4	173.4
oil/gas	Germany	Europe	Western Europe	Gera-Lusan power station	IC			25	operating	2018		ICCC	NG					Engie Deutschland GmbH [100.0%]	ENGIE SA [100.0%]	50.8455	12.0788	exact	Gera			Thüringen	https://www.gem.wiki/Gera-Lusan_power_station	L100000408776	G100000412890	FR0010208488	1	25	25	6	2058	2098	2138	25	25	25	25	25	25	25	25	25	25	25	25
oil/gas	Germany	Europe	Western Europe	Gera-Tinz power station	IC			20	operating	2018		ICCC	NG					Engie Deutschland GmbH [100.0%]	ENGIE SA [100.0%]	50.8942	12.0745	exact	Gera			Thüringen	https://www.gem.wiki/Gera-Tinz_power_station	L100000400265	G100000400265	FR0010208488	1	20	20	6	2058	2098	2138	20	20	20	20	20	20	20	20	20	20	20	20
oil/gas	Belgium	Europe	Western Europe	Herdersbrug power station	1			465	operating	1998		CC	NG					Electrabel NV/SA [100%]	ENGIE SA [100.0%]	51.2629	3.2112	exact	Brugge			West Flanders	https://www.gem.wiki/Herdersbrug_power_station	L100000400027	G100000400027	FR0010208488	1	465	465	26	2038	2078	2118	465	465	465	465	465	465	465	465	465	465	465	465
oil/gas	Peru	Americas	Latin America and the Caribbean	Ilo power station	Ilo31-TG1	Central Termoeléctrica de Ilo	Ilo 21	190	operating	2013		GT	D					ENGIE Energía Perú SA [100%]	ENGIE Energía Perú SA [100.0%]	-17.776	-71.1893	exact	Ilo	Pacocha	Ilo	Moquegua	https://www.gem.wiki/Ilo_power_station	L100000103158	G100000406662	FR0010208488	1	1425		11	2053	2093	2133	190	190	190	190	190	190	190	190	190	190	190	190
oil/gas	Peru	Americas	Latin America and the Caribbean	Ilo power station	Ilo31-TG2	Central Termoeléctrica de Ilo	Ilo 21	190	operating	2013		GT	D					ENGIE Energía Perú SA [100%]	ENGIE Energía Perú SA [100.0%]	-17.776	-71.1893	exact	Ilo	Pacocha	Ilo	Moquegua	https://www.gem.wiki/Ilo_power_station	L100000103158	G100000406661	FR0010208488	1	1425		11	2053	2093	2133	190	190	190	190	190	190	190	190	190	190	190	190
oil/gas	Peru	Americas	Latin America and the Caribbean	Ilo power station	Ilo31-TG3	Central Termoeléctrica de Ilo	Ilo 21	190	operating	2013		GT	D					ENGIE Energía Perú SA [100%]	ENGIE Energía Perú SA [100.0%]	-17.776	-71.1893	exact	Ilo	Pacocha	Ilo	Moquegua	https://www.gem.wiki/Ilo_power_station	L100000103158	G100000406660	FR0010208488	1	1425		11	2053	2093	2133	190	190	190	190	190	190	190	190	190	190	190	190
oil/gas	Peru	Americas	Latin America and the Caribbean	Ilo power station	Ilo41-TG1	Central Termoeléctrica de Ilo	Ilo 21	240	operating	2016		GT	D					ENGIE Energía Perú SA [100%]	ENGIE Energía Perú SA [100.0%]	-17.776	-71.1893	exact	Ilo	Pacocha	Ilo	Moquegua	https://www.gem.wiki/Ilo_power_station	L100000103158	G100000406654	FR0010208488	1	1425		8	2056	2096	2136	240	240	240	240	240	240	240	240	240	240	240	240
oil/gas	Peru	Americas	Latin America and the Caribbean	Ilo power station	Ilo41-TG2	Central Termoeléctrica de Ilo	Ilo 21	240	operating	2016		GT	D					ENGIE Energía Perú SA [100%]	ENGIE Energía Perú SA [100.0%]	-17.776	-71.1893	exact	Ilo	Pacocha	Ilo	Moquegua	https://www.gem.wiki/Ilo_power_station	L100000103158	G100000406653	FR0010208488	1	1425		8	2056	2096	2136	240	240	240	240	240	240	240	240	240	240	240	240
oil/gas	Peru	Americas	Latin America and the Caribbean	Ilo power station	Ilo41-TG3	Central Termoeléctrica de Ilo	Ilo 21	240	operating	2016		GT	D					ENGIE Energía Perú SA [100%]	ENGIE Energía Perú SA [100.0%]	-17.776	-71.1893	exact	Ilo	Pacocha	Ilo	Moquegua	https://www.gem.wiki/Ilo_power_station	L100000103158	G100000406652	FR0010208488	1	1425	1425	8	2056	2096	2136	240	240	240	240	240	240	240	240	240	240	240	240
oil/gas	Saudi Arabia	Asia	Western Asia	Juaymah cogeneration Gas power plant	GT1	محطة الجعيمة لتوليد الكهرباء	Ju'Aymah/Juymah	155	operating	2006		GT	NG					Tihama Power Generation Co Ltd [100.0%]	ENGIE SA [60.0%]; Saudi Oger Ltd [40.0%]	27.0196	49.5784	approximate	Jubail			Eastern	https://www.gem.wiki/Juaymah_cogeneration_Gas_power_plant	L100000405546	G100000404984	FR0010208488	0.6	496.7		18	2046	2086	2126	93	93	93	93	93	93	93	93	93	93	93	93
oil/gas	Saudi Arabia	Asia	Western Asia	Juaymah cogeneration Gas power plant	GT2	محطة الجعيمة لتوليد الكهرباء	Ju'Aymah/Juymah	155	operating	2006		GT	NG					Tihama Power Generation Co Ltd [100.0%]	ENGIE SA [60.0%]; Saudi Oger Ltd [40.0%]	27.0196	49.5784	approximate	Jubail			Eastern	https://www.gem.wiki/Juaymah_cogeneration_Gas_power_plant	L100000405546	G100000404985	FR0010208488	0.6	496.7		18	2046	2086	2126	93	93	93	93	93	93	93	93	93	93	93	93
oil/gas	Saudi Arabia	Asia	Western Asia	Juaymah cogeneration Gas power plant	GT3	محطة الجعيمة لتوليد الكهرباء	Ju'Aymah/Juymah	186.7	operating	2015		GT	NG					Tihama Power Generation Co Ltd [100.0%]	ENGIE SA [60.0%]; Saudi Oger Ltd [40.0%]	27.0196	49.5784	approximate	Jubail			Eastern	https://www.gem.wiki/Juaymah_cogeneration_Gas_power_plant	L100000405546	G100000404983	FR0010208488	0.6	496.7	496.7	9	2055	2095	2135	112.02	112.02	112.02	112.02	112.02	112.02	112.02	112.02	112.02	112.02	112.02	112.02
oil/gas	Italy	Europe	Southern Europe	Leini power station	1			380	operating	2007		CC	NG					Engie Italia SpA [100.0%]	ENGIE SA [100.0%]	45.163	7.7505	exact	Leini			Turin	https://www.gem.wiki/Leini_power_station	L100000400391	G100000400391	FR0010208488	1	380	380	17	2047	2087	2127	380	380	380	380	380	380	380	380	380	380	380	380
oil/gas	Belgium	Europe	Western Europe	Les Awirs power station	CC1		Centrale des Awirs	875	pre-construction	2025		CC	NG					Electrabel NV/SA [100%]	ENGIE SA [100.0%]	50.5856	5.41687	exact	Flémalle			Liege	https://www.gem.wiki/Les_Awirs_power_station	L100000406373	G100000406281	FR0010208488	1	875	875	-1	2065	2105	2145	0	0	0	0	0	875	875	875	875	875	875	875
oil/gas	Belgium	Europe	Western Europe	Lillo Degussa power station	1		Evonik Degussa	42	operating	1999		CC	NG					Electrabel NV/SA [100%]	ENGIE SA [100.0%]	51.3095	4.30402	exact	Antwerp			Antwerp	https://www.gem.wiki/Lillo_Degussa_power_station	L100000400030	G100000400030	FR0010208488	1	85		25	2039	2079	2119	42	42	42	42	42	42	42	42	42	42	42	42
oil/gas	Belgium	Europe	Western Europe	Lillo Degussa power station	2		Evonik Degussa	43	operating	2011		CC	NG					Electrabel NV/SA [100%]	ENGIE SA [100.0%]	51.3095	4.30402	exact	Antwerp			Antwerp	https://www.gem.wiki/Lillo_Degussa_power_station	L100000400030	G100000410396	FR0010208488	1	85	85	13	2051	2091	2131	43	43	43	43	43	43	43	43	43	43	43	43
oil/gas	Netherlands	Europe	Western Europe	Maxima power station	4			440	operating	2010		CC	NG					ENGIE SA [100%]	ENGIE SA [100.0%]	52.5772	5.53	exact	Lelystad			Flevoland	https://www.gem.wiki/Maxima_power_station	L100000400544	G100000400544	FR0010208488	1	880		14	2050	2090	2130	440	440	440	440	440	440	440	440	440	440	440	440
oil/gas	Netherlands	Europe	Western Europe	Maxima power station	5			440	operating	2010		CC	NG					ENGIE SA [100%]	ENGIE SA [100.0%]	52.5772	5.53	exact	Lelystad			Flevoland	https://www.gem.wiki/Maxima_power_station	L100000400544	G100000400545	FR0010208488	1	880	880	14	2050	2090	2130	440	440	440	440	440	440	440	440	440	440	440	440
oil/gas	Chile	Americas	Latin America and the Caribbean	Mejillones power station	3	Termoeléctrica Mejillones	Red Dragon (Unit 4/Unit 5)/IEM2 (Unit 5)/IEM1 (Unit 4)/Infraestructura Energética de Mejillones	245	operating	2000		CC	NG					ENGIE Energía Chile SA [100%]	ENGIE Energía Chile SA [100.0%]	-23.0892	-70.4103	exact	Mejillones			Antofagasta	https://www.gem.wiki/Mejillones_power_station	L100000100184	G100000406727	FR0010208488	1	1329		24	2040	2080	2120	245	245	245	245	245	245	245	245	245	245	245	245
oil/gas	Chile	Americas	Latin America and the Caribbean	Mejillones power station	Unit 4	Termoeléctrica Mejillones	IEM2 (Unit 5)/Infraestructura Energética de Mejillones/Red Dragon (Unit 4/Unit 5)/IEM1 (Unit 4)	375	announced	2025		ST	NG/D					ENGIE Energía Chile SA [100%]	ENGIE Energía Chile SA [100.0%]	-23.0892	-70.4103	exact	Mejillones			Antofagasta	https://www.gem.wiki/Mejillones_power_station	L100000100184	G100000106833	FR0010208488	1	1329	1329	-1	2065	2105	2145	0	0	0	0	0	375	375	375	375	375	375	375
oil/gas	Australia	Oceania	Australia and New Zealand	Mintaro GT power station	1			90	operating	1990	2030	GT	NG					Synergen Power Pty Ltd [100.0%]	ENGIE SA [72.0%]; Mitsui & Co Ltd [28.0%]	-33.9032	138.738	exact	Stanley			South Australia	https://www.gem.wiki/Mintaro_GT_power_station	L100000405122	G100000401527	FR0010208488	0.72	90	90	34	2030	2070	2110	64.8	64.8	64.8	64.8	64.8	64.8	64.8	64.8	64.8	64.8	64.8	64.8
oil/gas	United Arab Emirates	Asia	Western Asia	Mirfa Independent Water and Power Project	1	محطة المرفأ للمنتج المستقل٫ محطة المرفأ الجديدة/محطة ميبكو	MIPCO/New Mifrah/New Al Mirfa Power Plant	90	operating	2017	2042	GT	NG					Mirfa International Power and Water Company PJSC [100.0%]	Abu Dhabi Water and Electricity Authority [60.0%]; ENGIE SA [20.0%]; Sojitz Corp [20.0%]	24.121	53.447	exact	Al Mirfa			Abu Dhabi	https://www.gem.wiki/Mirfa_Independent_Water_and_Power_Project	L100000405588	G100000405039	FR0010208488	0.2	1697		7	2057	2097	2137	18	18	18	18	18	18	18	18	18	18	18	18
oil/gas	United Arab Emirates	Asia	Western Asia	Mirfa Independent Water and Power Project	2	محطة المرفأ للمنتج المستقل٫ محطة المرفأ الجديدة/محطة ميبكو	MIPCO/New Mifrah/New Al Mirfa Power Plant	90	operating	2017	2042	GT	NG					Mirfa International Power and Water Company PJSC [100.0%]	Abu Dhabi Water and Electricity Authority [60.0%]; ENGIE SA [20.0%]; Sojitz Corp [20.0%]	24.121	53.447	exact	Al Mirfa			Abu Dhabi	https://www.gem.wiki/Mirfa_Independent_Water_and_Power_Project	L100000405588	G100000405040	FR0010208488	0.2	1697		7	2057	2097	2137	18	18	18	18	18	18	18	18	18	18	18	18
oil/gas	United Arab Emirates	Asia	Western Asia	Mirfa Independent Water and Power Project	3	محطة المرفأ للمنتج المستقل٫ محطة المرفأ الجديدة/محطة ميبكو	MIPCO/New Mifrah/New Al Mirfa Power Plant	90	operating	2017	2042	GT	NG					Mirfa International Power and Water Company PJSC [100.0%]	Abu Dhabi Water and Electricity Authority [60.0%]; ENGIE SA [20.0%]; Sojitz Corp [20.0%]	24.121	53.447	exact	Al Mirfa			Abu Dhabi	https://www.gem.wiki/Mirfa_Independent_Water_and_Power_Project	L100000405588	G100000405041	FR0010208488	0.2	1697		7	2057	2097	2137	18	18	18	18	18	18	18	18	18	18	18	18
oil/gas	United Arab Emirates	Asia	Western Asia	Mirfa Independent Water and Power Project	4	محطة المرفأ للمنتج المستقل٫ محطة المرفأ الجديدة/محطة ميبكو	MIPCO/New Mifrah/New Al Mirfa Power Plant	90	operating	2017	2042	GT	NG					Mirfa International Power and Water Company PJSC [100.0%]	Abu Dhabi Water and Electricity Authority [60.0%]; ENGIE SA [20.0%]; Sojitz Corp [20.0%]	24.121	53.447	exact	Al Mirfa			Abu Dhabi	https://www.gem.wiki/Mirfa_Independent_Water_and_Power_Project	L100000405588	G100000405042	FR0010208488	0.2	1697		7	2057	2097	2137	18	18	18	18	18	18	18	18	18	18	18	18
oil/gas	United Arab Emirates	Asia	Western Asia	Mirfa Independent Water and Power Project	CC	محطة المرفأ للمنتج المستقل٫ محطة المرفأ الجديدة/محطة ميبكو	MIPCO/New Mifrah/New Al Mirfa Power Plant	1337	operating	2017	2042	CC	NG					Mirfa International Power and Water Company PJSC [100.0%]	Abu Dhabi Water and Electricity Authority [60.0%]; ENGIE SA [20.0%]; Sojitz Corp [20.0%]	24.121	53.447	exact	Al Mirfa			Abu Dhabi	https://www.gem.wiki/Mirfa_Independent_Water_and_Power_Project	L100000405588	G100000405038	FR0010208488	0.2	1697	1697	7	2057	2097	2137	267.4	267.4	267.4	267.4	267.4	267.4	267.4	267.4	267.4	267.4	267.4	267.4
oil/gas	Belgium	Europe	Western Europe	Monsanto Oud-Lillo power station	1		Gasturbine Oud-Lillo/Oud-Lillo Monsanto	43	operating			not found	NG					Electrabel NV/SA [100%]	ENGIE SA [100.0%]	51.3155	4.28961	approximate	Antwerp			Antwerp	https://www.gem.wiki/Monsanto_Oud-Lillo_power_station	L100000406368	G100000406274	FR0010208488	1	43	43	-99	40	80	120	43	43	43	43	43	43	43	43	43	43	43	43
oil/gas	France	Europe	Western Europe	Montoir-De-Bretagne power station	1		SPEM/La Centrale Thermique de Grandes-Rivieres	435	operating	2010		CC	NG					Engie Energy France [100.0%]	ENGIE SA [100.0%]	47.3072	-2.13716	exact	Montoir-de-Bretagne			Loire-Atlantique	https://www.gem.wiki/Montoir-De-Bretagne_power_station	L100000400104	G100000400104	FR0010208488	1	435	435	14	2050	2090	2130	435	435	435	435	435	435	435	435	435	435	435	435
oil/gas	Italy	Europe	Southern Europe	Napoli Levante power station	1			400	operating	2009		CC	NG					Tirreno Power SpA [100.0%]	ENGIE SA [50.0%]; Energia Italiana SpA [50.0%]	40.8339	14.3006	exact	Napoli			Campania	https://www.gem.wiki/Napoli_Levante_power_station	L100000400407	G100000400407	FR0010208488	0.5	400	400	15	2049	2089	2129	200	200	200	200	200	200	200	200	200	200	200	200
oil/gas	United States	Americas	Northern America	Nassau Energy power station	CC1			55	retired	1991	2022	CC	NG/FO					Engie North America [100.0%]	ENGIE SA [100.0%]	40.7264	-73.5892	exact	Garden City	Nassau		New York	https://www.gem.wiki/Nassau_Energy_power_station	L100000401658	G100000401732	FR0010208488	1	55	55	33	2031	2071	2111	55	55	0	0	0	0	0	0	0	0	0	0
oil/gas	Italy	Europe	Southern Europe	Nera Montoro power station	1			50	operating	1994		CC	NG					Engie Servizi SpA [100.0%]	ENGIE SA [100.0%]	42.4943	12.4724	exact	Nera Montoro			Terni	https://www.gem.wiki/Nera_Montoro_power_station	L100000400408	G100000400408	FR0010208488	1	50	50	30	2034	2074	2114	50	50	50	50	50	50	50	50	50	50	50	50
oil/gas	United States	Americas	Northern America	Oyster Creek Unit VIII power station	CC1			498	operating	1994		CC	NG/OG					Engie North America [50.0%]; Toyota Tsusho Corp [37.5%]; GE Energy Financial Services [12.5%]	ENGIE SA [50.0%]; General Electric Co [12.5%]	28.9802	-95.342	exact	Freeport	Brazoria		Texas	https://www.gem.wiki/Oyster_Creek_Unit_VIII_power_station	L100000401670	G100000401762	FR0010208488	0.5	498	498	30	2034	2074	2114	249	249	249	249	249	249	249	249	249	249	249	249
oil/gas	Saudi Arabia	Asia	Western Asia	Ras Tanura Tihama power station	1	محطة توليد رأس تنورة		75	operating	2006		GT	NG					Tihama Power Generation Co Ltd [100.0%]	ENGIE SA [60.0%]; Saudi Oger Ltd [40.0%]	26.8003	50.0039	exact	Ras Tanura			Ash Sharqiyah	https://www.gem.wiki/Ras_Tanura_Tihama_power_station	L100000407703	G100000410109	FR0010208488	0.6	150		18	2046	2086	2126	45	45	45	45	45	45	45	45	45	45	45	45
oil/gas	Saudi Arabia	Asia	Western Asia	Ras Tanura Tihama power station	2	محطة توليد رأس تنورة		75	operating	2006		GT	NG					Tihama Power Generation Co Ltd [100.0%]	ENGIE SA [60.0%]; Saudi Oger Ltd [40.0%]	26.8003	50.0039	exact	Ras Tanura			Ash Sharqiyah	https://www.gem.wiki/Ras_Tanura_Tihama_power_station	L100000407703	G100000410108	FR0010208488	0.6	150	150	18	2046	2086	2126	45	45	45	45	45	45	45	45	45	45	45	45
oil/gas	Saudi Arabia	Asia	Western Asia	Riyadh PP11 power station	2	محطة الكهرباء الخامسة		824	operating	1979		CC	NG/LFO					Dhuruma O&M Co Ltd [100.0%]	ENGIE SA [80.0%]; Aljomaih Energy & Water Co Ltd [20.0%]	24.7734	46.6563	exact	Dhurma - Riyadh			Ar Riyad	https://www.gem.wiki/Riyadh_PP11_power_station	L100000407708	G100000410127	FR0010208488	0.8	1805		45	2019	2059	2099	659.2	659.2	659.2	659.2	659.2	659.2	659.2	659.2	659.2	659.2	659.2	659.2
oil/gas	Saudi Arabia	Asia	Western Asia	Riyadh PP11 power station	1	محطة الكهرباء الخامسة		981	operating	2013		CC	NG/LFO					Dhuruma O&M Co Ltd [100.0%]	ENGIE SA [80.0%]; Aljomaih Energy & Water Co Ltd [20.0%]	24.7734	46.6563	exact	Dhurma - Riyadh			Ar Riyad	https://www.gem.wiki/Riyadh_PP11_power_station	L100000407708	G100000410128	FR0010208488	0.8	1805	1805	11	2053	2093	2133	784.8	784.8	784.8	784.8	784.8	784.8	784.8	784.8	784.8	784.8	784.8	784.8
oil/gas	Germany	Europe	Western Europe	Romerbrucke power station	2b	HKW Römerbrücke/Kraftwerk Römerbrücke	Saarland power plant	53	operating	1965		ST	NG					Energie SaarLorLux AG [100.0%]	ENGIE SA [51.0%]; Stadtwerke Saarbrücken GmbH [49.0%]	49.2239	7.0149	exact	Saarbrücken			Saarland	https://www.gem.wiki/Romerbrucke_power_station	L100000101975	G100000409751	FR0010208488	0.51	177		59	2005	2045	2085	27.03	27.03	27.03	27.03	27.03	27.03	27.03	27.03	27.03	27.03	27.03	27.03
oil/gas	Germany	Europe	Western Europe	Romerbrucke power station	1	HKW Römerbrücke/Kraftwerk Römerbrücke	Saarland power plant	74	operating	2005		CC	NG					Energie SaarLorLux AG [100.0%]	ENGIE SA [51.0%]; Stadtwerke Saarbrücken GmbH [49.0%]	49.2239	7.0149	exact	Saarbrücken			Saarland	https://www.gem.wiki/Romerbrucke_power_station	L100000101975	G100000400242	FR0010208488	0.51	177		19	2045	2085	2125	37.74	37.74	37.74	37.74	37.74	37.74	37.74	37.74	37.74	37.74	37.74	37.74
oil/gas	Germany	Europe	Western Europe	Romerbrucke power station	IC	HKW Römerbrücke/Kraftwerk Römerbrücke	Saarland power plant	50	operating	2022		ICCC	NG					Energie SaarLorLux AG [100.0%]	ENGIE SA [51.0%]; Stadtwerke Saarbrücken GmbH [49.0%]	49.2239	7.0149	exact	Saarbrücken			Saarland	https://www.gem.wiki/Romerbrucke_power_station	L100000101975	G100000412845	FR0010208488	0.51	177	177	2	2062	2102	2142	0	0	25.5	25.5	25.5	25.5	25.5	25.5	25.5	25.5	25.5	25.5
oil/gas	Belgium	Europe	Western Europe	Saint-Ghislain power station	1			350	operating	2001		CC	NG					Electrabel NV/SA [100%]	ENGIE SA [100.0%]	50.4719	3.8248	exact	Baudour			Hainaut	https://www.gem.wiki/Saint-Ghislain_power_station	L100000400033	G100000400033	FR0010208488	1	350	350	23	2041	2081	2121	350	350	350	350	350	350	350	350	350	350	350	350
oil/gas	France	Europe	Western Europe	Saint-Ouen-sur-Seine power station	1	CENTRALE THERMIQUE DE BATELIERS		128	operating	2001		GT	NG					Paris Urban Heating Company SA [100.0%]	ENGIE SA [66.0%]; City of Paris [33.0%]	48.9117	2.32764	exact	Saint-Ouen-sur-Seine			Ile-de-France	https://www.gem.wiki/Saint-Ouen-sur-Seine_power_station	L100000407655	G100000409982	FR0010208488	0.66	128	128	23	2041	2081	2121	84.48	84.48	84.48	84.48	84.48	84.48	84.48	84.48	84.48	84.48	84.48	84.48
oil/gas	Belgium	Europe	Western Europe	Sappi Lanaken power station	1			43	operating			not found	NG					Electrabel NV/SA [100%]	ENGIE SA [100.0%]	50.8827	5.64195	exact	Lanaken			Limburg Province	https://www.gem.wiki/Sappi_Lanaken_power_station	L100000406370	G100000406276	FR0010208488	1	43	43	-99	40	80	120	43	43	43	43	43	43	43	43	43	43	43	43
oil/gas	Belgium	Europe	Western Europe	Scheldelaan Exxonmobil power station	1			140	operating	2009		not found	NG					Electrabel NV/SA [100%]	ENGIE SA [100.0%]	51.254	4.334	exact	Antwerp			Antwerp	https://www.gem.wiki/Scheldelaan_Exxonmobil_power_station	L100000400034	G100000400034	FR0010208488	1	140	140	15	2049	2089	2129	140	140	140	140	140	140	140	140	140	140	140	140
oil/gas	Singapore	Asia	South-eastern Asia	Senoko power station	1			425	operating	1996		CC	NG					Senoko Energy Pte Ltd [100.0%]	ENGIE SA [30.0%]; Marubeni Corp [30.0%]; Kansai Electric Power Co [15.0%]; Kyushu Electric Power Co Inc [15.0%]; Japan Bank for International Cooperation [10.0%]	1.4655	103.8	exact	Sembawang			North Region	https://www.gem.wiki/Senoko_power_station	L100000405353	G100000404571	FR0010208488	0.3	3292		28	2036	2076	2116	127.5	127.5	127.5	127.5	127.5	127.5	127.5	127.5	127.5	127.5	127.5	127.5
oil/gas	Singapore	Asia	South-eastern Asia	Senoko power station	2			425	operating	1996		CC	NG					Senoko Energy Pte Ltd [100.0%]	ENGIE SA [30.0%]; Marubeni Corp [30.0%]; Kansai Electric Power Co [15.0%]; Kyushu Electric Power Co Inc [15.0%]; Japan Bank for International Cooperation [10.0%]	1.4655	103.8	exact	Sembawang			North Region	https://www.gem.wiki/Senoko_power_station	L100000405353	G100000404572	FR0010208488	0.3	3292		28	2036	2076	2116	127.5	127.5	127.5	127.5	127.5	127.5	127.5	127.5	127.5	127.5	127.5	127.5
oil/gas	Singapore	Asia	South-eastern Asia	Senoko power station	3			360	operating	2002		CC	NG					Senoko Energy Pte Ltd [100.0%]	ENGIE SA [30.0%]; Marubeni Corp [30.0%]; Kansai Electric Power Co [15.0%]; Kyushu Electric Power Co Inc [15.0%]; Japan Bank for International Cooperation [10.0%]	1.4655	103.8	exact	Sembawang			North Region	https://www.gem.wiki/Senoko_power_station	L100000405353	G100000404573	FR0010208488	0.3	3292		22	2042	2082	2122	108	108	108	108	108	108	108	108	108	108	108	108
oil/gas	Singapore	Asia	South-eastern Asia	Senoko power station	4			360	operating	2004		CC	NG					Senoko Energy Pte Ltd [100.0%]	ENGIE SA [30.0%]; Marubeni Corp [30.0%]; Kansai Electric Power Co [15.0%]; Kyushu Electric Power Co Inc [15.0%]; Japan Bank for International Cooperation [10.0%]	1.4655	103.8	exact	Sembawang			North Region	https://www.gem.wiki/Senoko_power_station	L100000405353	G100000404574	FR0010208488	0.3	3292		20	2044	2084	2124	108	108	108	108	108	108	108	108	108	108	108	108
oil/gas	Singapore	Asia	South-eastern Asia	Senoko power station	5			360	operating	2004		CC	NG					Senoko Energy Pte Ltd [100.0%]	ENGIE SA [30.0%]; Marubeni Corp [30.0%]; Kansai Electric Power Co [15.0%]; Kyushu Electric Power Co Inc [15.0%]; Japan Bank for International Cooperation [10.0%]	1.4655	103.8	exact	Sembawang			North Region	https://www.gem.wiki/Senoko_power_station	L100000405353	G100000404575	FR0010208488	0.3	3292		20	2044	2084	2124	108	108	108	108	108	108	108	108	108	108	108	108
oil/gas	Singapore	Asia	South-eastern Asia	Senoko power station	6			431	operating	2013		CC	NG					Senoko Energy Pte Ltd [100.0%]	ENGIE SA [30.0%]; Marubeni Corp [30.0%]; Kansai Electric Power Co [15.0%]; Kyushu Electric Power Co Inc [15.0%]; Japan Bank for International Cooperation [10.0%]	1.4655	103.8	exact	Sembawang			North Region	https://www.gem.wiki/Senoko_power_station	L100000405353	G100000404576	FR0010208488	0.3	3292		11	2053	2093	2133	129.3	129.3	129.3	129.3	129.3	129.3	129.3	129.3	129.3	129.3	129.3	129.3
oil/gas	Singapore	Asia	South-eastern Asia	Senoko power station	7			431	operating	2013		CC	NG					Senoko Energy Pte Ltd [100.0%]	ENGIE SA [30.0%]; Marubeni Corp [30.0%]; Kansai Electric Power Co [15.0%]; Kyushu Electric Power Co Inc [15.0%]; Japan Bank for International Cooperation [10.0%]	1.4655	103.8	exact	Sembawang			North Region	https://www.gem.wiki/Senoko_power_station	L100000405353	G100000404577	FR0010208488	0.3	3292		11	2053	2093	2133	129.3	129.3	129.3	129.3	129.3	129.3	129.3	129.3	129.3	129.3	129.3	129.3
oil/gas	Singapore	Asia	South-eastern Asia	Senoko power station	ST1			250	operating			ST	NG/FO					Senoko Energy Pte Ltd [100.0%]	ENGIE SA [30.0%]; Marubeni Corp [30.0%]; Kansai Electric Power Co [15.0%]; Kyushu Electric Power Co Inc [15.0%]; Japan Bank for International Cooperation [10.0%]	1.4655	103.8	exact	Sembawang			North Region	https://www.gem.wiki/Senoko_power_station	L100000405353	G100000413180	FR0010208488	0.3	3292		-99	40	80	120	75	75	75	75	75	75	75	75	75	75	75	75
oil/gas	Singapore	Asia	South-eastern Asia	Senoko power station	ST2			250	operating			ST	NG/FO					Senoko Energy Pte Ltd [100.0%]	ENGIE SA [30.0%]; Marubeni Corp [30.0%]; Kansai Electric Power Co [15.0%]; Kyushu Electric Power Co Inc [15.0%]; Japan Bank for International Cooperation [10.0%]	1.4655	103.8	exact	Sembawang			North Region	https://www.gem.wiki/Senoko_power_station	L100000405353	G100000413179	FR0010208488	0.3	3292	3292	-99	40	80	120	75	75	75	75	75	75	75	75	75	75	75	75
oil/gas	Italy	Europe	Southern Europe	Settimo Torinese power station	1			60	operating	1995		CC	NG					Engie Servizi SpA [100.0%]	ENGIE SA [100.0%]	45.1261	7.73778	exact	Settimo Torinese			Turin	https://www.gem.wiki/Settimo_Torinese_power_station	L100000400450	G100000400450	FR0010208488	1	60	60	29	2035	2075	2115	60	60	60	60	60	60	60	60	60	60	60	60
oil/gas	Saudi Arabia	Asia	Western Asia	Shedgum cogeneration Gas power plant	GT1		Shedgum Aramco	155	operating	2006		GT	NG					Tihama Power Generation Co Ltd [100.0%]	ENGIE SA [60.0%]; Saudi Oger Ltd [40.0%]	25.6516	49.3855	exact	Al Ahsa			Eastern	https://www.gem.wiki/Shedgum_cogeneration_Gas_power_plant	L100000405564	G100000404986	FR0010208488	0.6	496.7		18	2046	2086	2126	93	93	93	93	93	93	93	93	93	93	93	93
oil/gas	Saudi Arabia	Asia	Western Asia	Shedgum cogeneration Gas power plant	GT2		Shedgum Aramco	155	operating	2006		GT	NG					Tihama Power Generation Co Ltd [100.0%]	ENGIE SA [60.0%]; Saudi Oger Ltd [40.0%]	25.6516	49.3855	exact	Al Ahsa			Eastern	https://www.gem.wiki/Shedgum_cogeneration_Gas_power_plant	L100000405564	G100000404987	FR0010208488	0.6	496.7		18	2046	2086	2126	93	93	93	93	93	93	93	93	93	93	93	93
oil/gas	Saudi Arabia	Asia	Western Asia	Shedgum cogeneration Gas power plant	GT3		Shedgum Aramco	186.7	operating	2015		GT	NG					Tihama Power Generation Co Ltd [100.0%]	ENGIE SA [60.0%]; Saudi Oger Ltd [40.0%]	25.6516	49.3855	exact	Al Ahsa			Eastern	https://www.gem.wiki/Shedgum_cogeneration_Gas_power_plant	L100000405564	G100000404988	FR0010208488	0.6	496.7	496.7	9	2055	2095	2135	112.02	112.02	112.02	112.02	112.02	112.02	112.02	112.02	112.02	112.02	112.02	112.02
oil/gas	United Arab Emirates	Asia	Western Asia	Shuweihat S1 power plant	1	مجمع الشويهات للطاقة والمياه/محطة الشويهات S1 المستقلة للمياه والطاقة		1615	operating	2004	2025	CC	NG					Shuweihat CMS International Power Company PJSC [100.0%]	Abu Dhabi National Energy Company PJSC [60.0%]; ENGIE SA [20.0%]; Sumitomo Corp [20.0%]	24.1651	52.5697	exact	Jebel Dhanna			Abu Dhabi	https://www.gem.wiki/Shuweihat_S1_power_plant	L100000405592	G100000405048	FR0010208488	0.2	1615	1615	20	2044	2084	2124	323	323	323	323	323	323	323	323	323	323	323	323
oil/gas	United Arab Emirates	Asia	Western Asia	Shuweihat S2 power plant	1	مجمع الشويهات للطاقة والمياه/محطة الشويهات S2 المستقلة للمياه والطاقة		820.5	operating	2011	2036	CC	NG/FO					Ruwais Power Company PJSC [100.0%]	Abu Dhabi National Energy Company PJSC [54.0%]; ENGIE SA [20.0%]; Marubeni Corp [10.0%]; Osaka Gas Co Ltd [10.0%]; Abu Dhabi Water and Electricity Authority [6.0%]	24.1569	52.5692	exact	Jebel Dhanna			Abu Dhabi	https://www.gem.wiki/Shuweihat_S2_power_plant	L100000405593	G100000405049	FR0010208488	0.2	1641		13	2051	2091	2131	164.1	164.1	164.1	164.1	164.1	164.1	164.1	164.1	164.1	164.1	164.1	164.1
oil/gas	United Arab Emirates	Asia	Western Asia	Shuweihat S2 power plant	2	مجمع الشويهات للطاقة والمياه/محطة الشويهات S2 المستقلة للمياه والطاقة		820.5	operating	2012	2036	CC	NG/FO					Ruwais Power Company PJSC [100.0%]	Abu Dhabi National Energy Company PJSC [54.0%]; ENGIE SA [20.0%]; Marubeni Corp [10.0%]; Osaka Gas Co Ltd [10.0%]; Abu Dhabi Water and Electricity Authority [6.0%]	24.1569	52.5692	exact	Jebel Dhanna			Abu Dhabi	https://www.gem.wiki/Shuweihat_S2_power_plant	L100000405593	G100000405050	FR0010208488	0.2	1641	1641	12	2052	2092	2132	164.1	164.1	164.1	164.1	164.1	164.1	164.1	164.1	164.1	164.1	164.1	164.1
oil/gas	Portugal	Europe	Southern Europe	Tapada do Outeiro power station	G1			330	operating	1998		CC	NG					TrustEnergy BV [100%]	ENGIE SA [50.0%]; Marubeni Corp [50.0%]	41.07	-8.4587	exact	Medas			Porto	https://www.gem.wiki/Tapada_do_Outeiro_power_station	L100000400593	G100000400593	FR0010208488	0.5	990		26	2038	2078	2118	165	165	165	165	165	165	165	165	165	165	165	165
oil/gas	Portugal	Europe	Southern Europe	Tapada do Outeiro power station	G2			330	operating	1998		CC	NG					TrustEnergy BV [100%]	ENGIE SA [50.0%]; Marubeni Corp [50.0%]	41.07	-8.4587	exact	Medas			Porto	https://www.gem.wiki/Tapada_do_Outeiro_power_station	L100000400593	G100000400594	FR0010208488	0.5	990		26	2038	2078	2118	165	165	165	165	165	165	165	165	165	165	165	165
oil/gas	Portugal	Europe	Southern Europe	Tapada do Outeiro power station	G3			330	operating	1999		CC	NG					TrustEnergy BV [100%]	ENGIE SA [50.0%]; Marubeni Corp [50.0%]	41.07	-8.4587	exact	Medas			Porto	https://www.gem.wiki/Tapada_do_Outeiro_power_station	L100000400593	G100000400595	FR0010208488	0.5	990	990	25	2039	2079	2119	165	165	165	165	165	165	165	165	165	165	165	165
oil/gas	United Arab Emirates	Asia	Western Asia	Taweelah A1 power plant	1	محطة الطويلة A1	Taweelah A1 Integrated Water and Power Plant	1672.5	operating	2009	2029	CC	NG					Total Tractebel Emirates O&M Co SA [100.0%]	ENGIE SA [50.0%]; TotalEnergies SE [50.0%]	24.7604	54.6797	exact	Al Taweelah			Abu Dhabi	https://www.gem.wiki/Taweelah_A1_power_plant	L100000405595	G100000405053	FR0010208488	0.5	1672.5	1672.5	15	2049	2089	2129	836.25	836.25	836.25	836.25	836.25	836.25	836.25	836.25	836.25	836.25	836.25	836.25
oil/gas	United Arab Emirates	Asia	Western Asia	Taweelah A2 power plant	2	محطة الطويلة A2	Taweelah A2 Integrated Water and Power Plant	710	retired	2001	2022	CC	NG					Total Tractebel Emirates O&M Co SA [100.0%]	ENGIE SA [50.0%]; TotalEnergies SE [50.0%]	24.761	54.6826	exact	Al Taweelah			Abu Dhabi	https://www.gem.wiki/Taweelah_A2_power_plant	L100000405596	G100000405054	FR0010208488	0.5	710	710	23	2041	2081	2121	355	355	0	0	0	0	0	0	0	0	0	0
oil/gas	Chile	Americas	Latin America and the Caribbean	Tocopilla power station	16	Termoeléctrica Tocopilla		394	operating	2001		CC	NG					ENGIE Energía Chile SA [100%]	ENGIE Energía Chile SA [100.0%]	-22.0964	-70.2118	exact	Tocopilla		Tocopilla	Antofagasta Region	https://www.gem.wiki/Tocopilla_power_station	L100000100186	G100000406715	FR0010208488	1	662	662	23	2041	2081	2121	394	394	394	394	394	394	394	394	394	394	394	394
oil/gas	Italy	Europe	Southern Europe	Torrevaldaliga Sud power station	TV5			760	operating	2004		CC	NG					Tirreno Power SpA [100.0%]	ENGIE SA [50.0%]; Energia Italiana SpA [50.0%]	42.1241	11.7624	exact	Civitavecchia			Rome	https://www.gem.wiki/Torrevaldaliga_Sud_power_station	L100000400469	G100000400469	FR0010208488	0.5	1460		20	2044	2084	2124	380	380	380	380	380	380	380	380	380	380	380	380
oil/gas	Italy	Europe	Southern Europe	Torrevaldaliga Sud power station	TV6			380	operating	2005		CC	NG					Tirreno Power SpA [100.0%]	ENGIE SA [50.0%]; Energia Italiana SpA [50.0%]	42.1241	11.7624	exact	Civitavecchia			Rome	https://www.gem.wiki/Torrevaldaliga_Sud_power_station	L100000400469	G100000400470	FR0010208488	0.5	1460		19	2045	2085	2125	190	190	190	190	190	190	190	190	190	190	190	190
oil/gas	Italy	Europe	Southern Europe	Torrevaldaliga Sud power station	TV4			320	mothballed			GT	NG					Tirreno Power SpA [100.0%]	ENGIE SA [50.0%]; Energia Italiana SpA [50.0%]	42.1241	11.7624	exact	Civitavecchia			Rome	https://www.gem.wiki/Torrevaldaliga_Sud_power_station	L100000400469	G100000409808	FR0010208488	0.5	1460	1460	-99	40	80	120	0	0	0	0	0	0	0	0	0	0	0	0
oil/gas	Mexico	Americas	Latin America and the Caribbean	Tractebel Monterrey power station	1	Central CC Tractebel Monterrey		284	operating	2003		CC	NG					Tractebel Energía De Monterrey S de RL de CV [100%]	ENGIE SA [100.0%]	25.7664	-100.542	exact	García			Nuevo León	https://gem.wiki/Tractebel_Monterrey_power_station	L100000406255	G100000406442	FR0010208488	1	284	284	21	2043	2083	2123	284	284	284	284	284	284	284	284	284	284	284	284
oil/gas	Pakistan	Asia	Southern Asia	Uch power station	1			586	operating	2000		CC	NG/D					UCH Power Ltd [100.0%]	ENGIE SA; Swicorp Co	28.5827	68.1762	exact	Dera Murad Jamali		Nasirabad District	Balochistan	https://www.gem.wiki/Uch_power_station	L100000406037	G100000406123	FR0010208488	0.5	990		24	2040	2080	2120	293	293	293	293	293	293	293	293	293	293	293	293
oil/gas	Pakistan	Asia	Southern Asia	Uch power station	2			404	operating	2014		CC	NG/D					UCH-II Power Pvt Ltd [100.0%]	ENGIE SA; Swicorp Co	28.5827	68.1762	exact	Dera Murad Jamali		Nasirabad District	Balochistan	https://www.gem.wiki/Uch_power_station	L100000406037	G100000406124	FR0010208488	0.5	990	990	10	2054	2094	2134	202	202	202	202	202	202	202	202	202	202	202	202
oil/gas	United Arab Emirates	Asia	Western Asia	Umm Al Nar West and East Integrated Water and power plant	GT01	محطة أم النار الغربية للطاقة	Umm Al Nar East plant/UAN East/Umm Al Nar West cogeneration plant	59	operating	1979		GT	NG/FO					Arabian Power Company PJSC [100.0%]	Arabian United Power Company PJSC [60.0%]; ENGIE SA [20.0%]; Chubu Electric Power Co Inc [10.0%]; Tokyo Electric Power Co [10.0%]	24.4348	54.4876	exact	Abu Dhabi			Abu Dhabi	https://www.gem.wiki/Umm_Al_Nar_West_and_East_Integrated_Water_and_power_plant	L100000405598	G100000405072	FR0010208488	0.2	3078		45	2019	2059	2099	11.8	11.8	11.8	11.8	11.8	11.8	11.8	11.8	11.8	11.8	11.8	11.8
oil/gas	United Arab Emirates	Asia	Western Asia	Umm Al Nar West and East Integrated Water and power plant	GT02	محطة أم النار الغربية للطاقة	Umm Al Nar East plant/UAN East/Umm Al Nar West cogeneration plant	59	operating	1979		GT	NG/FO					Arabian Power Company PJSC [100.0%]	Arabian United Power Company PJSC [60.0%]; ENGIE SA [20.0%]; Chubu Electric Power Co Inc [10.0%]; Tokyo Electric Power Co [10.0%]	24.4348	54.4876	exact	Abu Dhabi			Abu Dhabi	https://www.gem.wiki/Umm_Al_Nar_West_and_East_Integrated_Water_and_power_plant	L100000405598	G100000405073	FR0010208488	0.2	3078		45	2019	2059	2099	11.8	11.8	11.8	11.8	11.8	11.8	11.8	11.8	11.8	11.8	11.8	11.8
oil/gas	United Arab Emirates	Asia	Western Asia	Umm Al Nar West and East Integrated Water and power plant	ST1	محطة أم النار الغربية للطاقة	Umm Al Nar East plant/UAN East/Umm Al Nar West cogeneration plant	60	operating	1981		ST	NG/FO					Arabian Power Company PJSC [100.0%]	Arabian United Power Company PJSC [60.0%]; ENGIE SA [20.0%]; Chubu Electric Power Co Inc [10.0%]; Tokyo Electric Power Co [10.0%]	24.4348	54.4876	exact	Abu Dhabi			Abu Dhabi	https://www.gem.wiki/Umm_Al_Nar_West_and_East_Integrated_Water_and_power_plant	L100000405598	G100000405064	FR0010208488	0.2	3078		43	2021	2061	2101	12	12	12	12	12	12	12	12	12	12	12	12
oil/gas	United Arab Emirates	Asia	Western Asia	Umm Al Nar West and East Integrated Water and power plant	ST2	محطة أم النار الغربية للطاقة	Umm Al Nar East plant/UAN East/Umm Al Nar West cogeneration plant	60	operating	1981		ST	NG/FO					Arabian Power Company PJSC [100.0%]	Arabian United Power Company PJSC [60.0%]; ENGIE SA [20.0%]; Chubu Electric Power Co Inc [10.0%]; Tokyo Electric Power Co [10.0%]	24.4348	54.4876	exact	Abu Dhabi			Abu Dhabi	https://www.gem.wiki/Umm_Al_Nar_West_and_East_Integrated_Water_and_power_plant	L100000405598	G100000405065	FR0010208488	0.2	3078		43	2021	2061	2101	12	12	12	12	12	12	12	12	12	12	12	12
oil/gas	United Arab Emirates	Asia	Western Asia	Umm Al Nar West and East Integrated Water and power plant	ST3	محطة أم النار الغربية للطاقة	Umm Al Nar East plant/UAN East/Umm Al Nar West cogeneration plant	60	operating	1981		ST	NG/FO					Arabian Power Company PJSC [100.0%]	Arabian United Power Company PJSC [60.0%]; ENGIE SA [20.0%]; Chubu Electric Power Co Inc [10.0%]; Tokyo Electric Power Co [10.0%]	24.4348	54.4876	exact	Abu Dhabi			Abu Dhabi	https://www.gem.wiki/Umm_Al_Nar_West_and_East_Integrated_Water_and_power_plant	L100000405598	G100000405066	FR0010208488	0.2	3078		43	2021	2061	2101	12	12	12	12	12	12	12	12	12	12	12	12
oil/gas	United Arab Emirates	Asia	Western Asia	Umm Al Nar West and East Integrated Water and power plant	ST4	محطة أم النار الغربية للطاقة	Umm Al Nar East plant/UAN East/Umm Al Nar West cogeneration plant	60	operating	1981		ST	NG/FO					Arabian Power Company PJSC [100.0%]	Arabian United Power Company PJSC [60.0%]; ENGIE SA [20.0%]; Chubu Electric Power Co Inc [10.0%]; Tokyo Electric Power Co [10.0%]	24.4348	54.4876	exact	Abu Dhabi			Abu Dhabi	https://www.gem.wiki/Umm_Al_Nar_West_and_East_Integrated_Water_and_power_plant	L100000405598	G100000405067	FR0010208488	0.2	3078		43	2021	2061	2101	12	12	12	12	12	12	12	12	12	12	12	12
oil/gas	United Arab Emirates	Asia	Western Asia	Umm Al Nar West and East Integrated Water and power plant	ST5	محطة أم النار الغربية للطاقة	Umm Al Nar East plant/UAN East/Umm Al Nar West cogeneration plant	60	operating	1981		ST	NG/FO					Arabian Power Company PJSC [100.0%]	Arabian United Power Company PJSC [60.0%]; ENGIE SA [20.0%]; Chubu Electric Power Co Inc [10.0%]; Tokyo Electric Power Co [10.0%]	24.4348	54.4876	exact	Abu Dhabi			Abu Dhabi	https://www.gem.wiki/Umm_Al_Nar_West_and_East_Integrated_Water_and_power_plant	L100000405598	G100000405068	FR0010208488	0.2	3078		43	2021	2061	2101	12	12	12	12	12	12	12	12	12	12	12	12
oil/gas	United Arab Emirates	Asia	Western Asia	Umm Al Nar West and East Integrated Water and power plant	ST6	محطة أم النار الغربية للطاقة	Umm Al Nar East plant/UAN East/Umm Al Nar West cogeneration plant	60	operating	1981		ST	NG/FO					Arabian Power Company PJSC [100.0%]	Arabian United Power Company PJSC [60.0%]; ENGIE SA [20.0%]; Chubu Electric Power Co Inc [10.0%]; Tokyo Electric Power Co [10.0%]	24.4348	54.4876	exact	Abu Dhabi			Abu Dhabi	https://www.gem.wiki/Umm_Al_Nar_West_and_East_Integrated_Water_and_power_plant	L100000405598	G100000405069	FR0010208488	0.2	3078		43	2021	2061	2101	12	12	12	12	12	12	12	12	12	12	12	12
oil/gas	United Arab Emirates	Asia	Western Asia	Umm Al Nar West and East Integrated Water and power plant	ST7	محطة أم النار الغربية للطاقة	Umm Al Nar East plant/UAN East/Umm Al Nar West cogeneration plant	150	operating	1998		ST	NG/FO					Arabian Power Company PJSC [100.0%]	Arabian United Power Company PJSC [60.0%]; ENGIE SA [20.0%]; Chubu Electric Power Co Inc [10.0%]; Tokyo Electric Power Co [10.0%]	24.4348	54.4876	exact	Abu Dhabi			Abu Dhabi	https://www.gem.wiki/Umm_Al_Nar_West_and_East_Integrated_Water_and_power_plant	L100000405598	G100000405070	FR0010208488	0.2	3078		26	2038	2078	2118	30	30	30	30	30	30	30	30	30	30	30	30
oil/gas	United Arab Emirates	Asia	Western Asia	Umm Al Nar West and East Integrated Water and power plant	ST8	محطة أم النار الغربية للطاقة	Umm Al Nar East plant/UAN East/Umm Al Nar West cogeneration plant	150	operating	1998		ST	NG/FO					Arabian Power Company PJSC [100.0%]	Arabian United Power Company PJSC [60.0%]; ENGIE SA [20.0%]; Chubu Electric Power Co Inc [10.0%]; Tokyo Electric Power Co [10.0%]	24.4348	54.4876	exact	Abu Dhabi			Abu Dhabi	https://www.gem.wiki/Umm_Al_Nar_West_and_East_Integrated_Water_and_power_plant	L100000405598	G100000405071	FR0010208488	0.2	3078		26	2038	2078	2118	30	30	30	30	30	30	30	30	30	30	30	30
oil/gas	United Arab Emirates	Asia	Western Asia	Umm Al Nar West and East Integrated Water and power plant	CC	محطة أم النار الغربية للطاقة	Umm Al Nar Gas Thermal IWPP Project/New Umm Al Nar plant/UAN (Sas Al Nakhl) cogeneration CCGT/Sas Al Nakheel (SASN) power station	2300	operating	2007	2027	CC	NG					Abu Dhabi National Energy Company PJSC [60.0%]; Engie Energy France [20.0%]; JERA Co Inc [20.0%]	Abu Dhabi National Energy Company PJSC [60.0%]; ENGIE SA [20.0%]; Chubu Electric Power Co Inc [10.0%]; Tokyo Electric Power Co [10.0%]	24.4348	54.4876	exact	Abu Dhabi			Abu Dhabi	https://www.gem.wiki/Umm_Al_Nar_West_and_East_Integrated_Water_and_power_plant	L100000405598	G100000410458	FR0010208488	0.2	3078	3078	17	2047	2087	2127	460	460	460	460	460	460	460	460	460	460	460	460
oil/gas	Saudi Arabia	Asia	Western Asia	Uthmaniyah cogeneration Gas power plant	GT1	محطة توليد العثمانية		155	operating	2006		GT	NG					Tihama Power Generation Co Ltd [100.0%]	ENGIE SA [60.0%]; Saudi Oger Ltd [40.0%]	25.19	49.307	exact	Uthmaniyah			Eastern	https://www.gem.wiki/Uthmaniyah_cogeneration_Gas_power_plant	L100000405566	G100000404980	FR0010208488	0.6	496.7		18	2046	2086	2126	93	93	93	93	93	93	93	93	93	93	93	93
oil/gas	Saudi Arabia	Asia	Western Asia	Uthmaniyah cogeneration Gas power plant	GT2	محطة توليد العثمانية		155	operating	2006		GT	NG					Tihama Power Generation Co Ltd [100.0%]	ENGIE SA [60.0%]; Saudi Oger Ltd [40.0%]	25.19	49.307	exact	Uthmaniyah			Eastern	https://www.gem.wiki/Uthmaniyah_cogeneration_Gas_power_plant	L100000405566	G100000404981	FR0010208488	0.6	496.7		18	2046	2086	2126	93	93	93	93	93	93	93	93	93	93	93	93
oil/gas	Saudi Arabia	Asia	Western Asia	Uthmaniyah cogeneration Gas power plant	GT3	محطة توليد العثمانية		186.7	operating	2015		GT	NG					Tihama Power Generation Co Ltd [100.0%]	ENGIE SA [60.0%]; Saudi Oger Ltd [40.0%]	25.19	49.307	exact	Uthmaniyah			Eastern	https://www.gem.wiki/Uthmaniyah_cogeneration_Gas_power_plant	L100000405566	G100000404982	FR0010208488	0.6	496.7	496.7	9	2055	2095	2135	112.02	112.02	112.02	112.02	112.02	112.02	112.02	112.02	112.02	112.02	112.02	112.02
oil/gas	Italy	Europe	Southern Europe	Vado Ligure power station	VL5			800	operating	2007		CC	NG					Tirreno Power SpA [100.0%]	ENGIE SA [50.0%]; Energia Italiana SpA [50.0%]	44.2755	8.4305	exact	Vado Ligure			Savona	https://www.gem.wiki/Vado_Ligure_power_station	L100000102858	G100000400475	FR0010208488	0.5	800	800	17	2047	2087	2127	400	400	400	400	400	400	400	400	400	400	400	400
oil/gas	Belgium	Europe	Western Europe	Vilvoorde power station	1			255	operating	2001		GT	NG					Electrabel NV/SA [100%]	ENGIE SA [100.0%]	50.9414	4.4246	exact	Vilvoorde			Flemish Brabant	https://www.gem.wiki/Vilvoorde_power_station	L100000400037	G100000400037	FR0010208488	1	1125		23	2041	2081	2121	255	255	255	255	255	255	255	255	255	255	255	255
oil/gas	Belgium	Europe	Western Europe	Vilvoorde power station	2			870	shelved	2025		CC	NG					Electrabel NV/SA [100%]	ENGIE SA [100.0%]	50.9414	4.4246	exact	Vilvoorde			Flemish Brabant	https://www.gem.wiki/Vilvoorde_power_station	L100000400037	G100000406273	FR0010208488	1	1125	1125	-1	2065	2105	2145	0	0	0	0	0	0	0	0	0	0	0	0
oil/gas	France	Europe	Western Europe	Vitry-sur-Seine cogeneration power station	1			125	operating	2001		GT	NG					COGETHERM; Paris Urban Heating Company SA	City of Paris; ENGIE SA; Electricité de France SA	48.7892	2.41731	exact	Vitry-sur-Seine			Val-de-Marne	https://www.gem.wiki/Vitry-sur-Seine_cogeneration_power_station	L100000406385	G100000406298	FR0010208488	0.333333	125	125	23	2041	2081	2121	41.6667	41.6667	41.6667	41.6667	41.6667	41.6667	41.6667	41.6667	41.6667	41.6667	41.6667	41.6667
oil/gas	Italy	Europe	Southern Europe	Voghera power station	1			381	operating	2005		CC	NG					Engie Italia SpA [100.0%]	ENGIE SA [100.0%]	45.0296	8.9723	exact	Voghera			Pavia	https://www.gem.wiki/Voghera_power_station	L100000400478	G100000400478	FR0010208488	1	381	381	19	2045	2085	2125	381	381	381	381	381	381	381	381	381	381	381	381
oil/gas	Canada	Americas	Northern America	West Windsor power plant	1			135.4	operating	1996		CC	NG					West Windsor Power [100.0%]	ENGIE SA	42.2807	-83.0876	exact	Windsor			Ontario	https://www.gem.wiki/West_Windsor_power_plant	L100000405257	G100000404228	FR0010208488	1	135.4	135.4	28	2036	2076	2116	135.4	135.4	135.4	135.4	135.4	135.4	135.4	135.4	135.4	135.4	135.4	135.4
oil/gas	Belgium	Europe	Western Europe	Wilmarsdonk Total power station	1			43	operating			GT	NG					Electrabel NV/SA [100%]	ENGIE SA [100.0%]	51.2717	4.3262	exact	Antwerp			Antwerp	https://www.gem.wiki/Wilmarsdonk_Total_power_station	L100000406371	G100000406279	FR0010208488	1	129		-99	40	80	120	43	43	43	43	43	43	43	43	43	43	43	43
oil/gas	Belgium	Europe	Western Europe	Wilmarsdonk Total power station	2			43	operating			GT	NG					Electrabel NV/SA [100%]	ENGIE SA [100.0%]	51.2717	4.3262	exact	Antwerp			Antwerp	https://www.gem.wiki/Wilmarsdonk_Total_power_station	L100000406371	G100000406278	FR0010208488	1	129		-99	40	80	120	43	43	43	43	43	43	43	43	43	43	43	43
oil/gas	Belgium	Europe	Western Europe	Wilmarsdonk Total power station	3			43	operating			GT	NG					Electrabel NV/SA [100%]	ENGIE SA [100.0%]	51.2717	4.3262	exact	Antwerp			Antwerp	https://www.gem.wiki/Wilmarsdonk_Total_power_station	L100000406371	G100000406277	FR0010208488	1	129	129	-99	40	80	120	43	43	43	43	43	43	43	43	43	43	43	43
oil/gas	Belgium	Europe	Western Europe	Zandvliet power station	1			386.2	operating	2005		CC	NG					Zandvliet Power NV [100%]	BASF Antwerpen NV [50.0%]; ENGIE SA [50.0%]	51.3689	4.26419	exact	Antwerp			Antwerp	https://www.gem.wiki/Zandvliet_Power_Station	L100000400038	G100000400038	FR0010208488	0.5	386.2	386.2	19	2045	2085	2125	193.1	193.1	193.1	193.1	193.1	193.1	193.1	193.1	193.1	193.1	193.1	193.1
oil/gas	Belgium	Europe	Western Europe	Zeebrugge 2 Fluxys power station	1			40	operating	1987		GT	NG					Electrabel NV/SA [100%]	ENGIE SA [100.0%]	51.3518	3.20869	exact	Bruges			West Flanders	https://www.gem.wiki/Zeebrugge_2_Fluxys_power_station	L100000400039	G100000400039	FR0010208488	1	40	40	37	2027	2067	2107	40	40	40	40	40	40	40	40	40	40	40	40
oil/gas	Belgium	Europe	Western Europe	Zelzate 2 Knippegroen power station	1			315	operating	2010		ST	NG/BFG					Electrabel NV/SA [100%]	ENGIE SA [100.0%]	51.1587	3.8068	exact	Gent			East Flanders	https://www.gem.wiki/Zelzate_2_Knippegroen_power_station	L100000407649	G100000409988	FR0010208488	1	315	315	14	2050	2090	2130	315	315	315	315	315	315	315	315	315	315	315	315
oil/gas	Belgium	Europe	Western Europe	Zwijndrecht Lanxess power station	1			58	operating	2010		CC	NG					Electrabel NV/SA [100%]	ENGIE SA [100.0%]	51.2382	4.3408	exact	Zwijndrecht			Antwerp	https://www.gem.wiki/Zwijndrecht_Lanxess_power_station	L100000400040	G100000400040	FR0010208488	1	58	58	14	2050	2090	2130	58	58	58	58	58	58	58	58	58	58	58	58
geothermal	Indonesia	Asia	South-eastern Asia	Muarah Laboh geothermal plant	1		Muara Laboh	85	operating	2019		flash steam - double						Sumitomo CORP [18%]; ENGIE [18%]; PT Supreme Energy [30%]; INPEX Corp [33%]		-1.6268	101.13	exact		Pauh Duo		West Sumatra	https://gem.wiki/Muarah_Laboh_geothermal_plant	L100000700113	G100000700188	FR0010208488	0.18	160		5	2059	2099	2139	15.3	15.3	15.3	15.3	15.3	15.3	15.3	15.3	15.3	15.3	15.3	15.3
geothermal	Indonesia	Asia	South-eastern Asia	Muarah Laboh geothermal plant	2		Muara Laboh	75	construction			unknown type						Sumitomo CORP [18%]; ENGIE [18%]; PT Supreme Energy [30%]; INPEX Corp [33%]		-1.6268	101.13	exact		Pauh Duo		West Sumatra	https://gem.wiki/Muarah_Laboh_geothermal_plant	L100000700113	G100000700189	FR0010208488	0.18	160	160	-99	40	80	120	0	0	0	0	0	0	0	13.5	13.5	13.5	13.5	13.5
geothermal	Indonesia	Asia	South-eastern Asia	Rajabasa geothermal power plant	1			110	construction	2025		unknown type						ENGIE [33%]; PT Supreme Energy [33%]; Sumitomo Corp [33%]		-5.7817	105.626	approximate		Gunung Rajabasa	South Lampung Regency	Lampung Province	https://gem.wiki/Rajabasa_geothermal_power_plant	L100000700144	G100000700237	FR0010208488	0.33	220		-1	2065	2105	2145	0	0	0	0	0	36.3	36.3	36.3	36.3	36.3	36.3	36.3
geothermal	Indonesia	Asia	South-eastern Asia	Rajabasa geothermal power plant	2			110	construction	2025		unknown type						ENGIE [33%]; PT Supreme Energy [33%]; Sumitomo Corp [33%]		-5.7817	105.626	approximate		Gunung Rajabasa	South Lampung Regency	Lampung Province	https://gem.wiki/Rajabasa_geothermal_power_plant	L100000700144	G100000700238	FR0010208488	0.33	220	220	-1	2065	2105	2145	0	0	0	0	0	36.3	36.3	36.3	36.3	36.3	36.3	36.3
geothermal	Indonesia	Asia	South-eastern Asia	Rantau Dedep geothermal power plant	1			91	operating	2021		unknown type						Tohoku Electric Power CO INC [10%]; PT Supreme Energy [25%]; Marubeni CORP [27%]; ENGIE [37%]		-4.2069	103.386	exact	Swarna Dwipa	Muara Enim		South Sumatra	https://gem.wiki/Rantau_Dedep_geothermal_power_plant	L100000700146	G100000700240	FR0010208488	0.37	91	91	3	2061	2101	2141	0	33.67	33.67	33.67	33.67	33.67	33.67	33.67	33.67	33.67	33.67	33.67
hydropower	Portugal	Europe	Southern Europe	Baixo Sabor Montante hydroelectric plant				153	operating	2016		pumped storage				TRUE	FALSE	ENGIE [40%]; Crédit Agricole Assurances [35%]; Mirova [25%]		41.2279	-7.0146	exact		Bragança			https://gem.wiki/Baixo_Sabor_Montante_hydroelectric_plant	L603190	G603225	FR0010208488	0.4	153	153	8	2056	2096	2136	61.2	61.2	61.2	61.2	61.2	61.2	61.2	61.2	61.2	61.2	61.2	61.2
hydropower	Portugal	Europe	Southern Europe	Bemposta hydroelectric plant				240	operating	1964		run-of-river				TRUE	FALSE	ENGIE [40%]; Crédit Agricole Assurances [35%]; Mirova [25%]		41.3011	-6.4697	exact		Bragança			https://gem.wiki/Bemposta_hydroelectric_plant	L603192	G603227	FR0010208488	0.4	240	240	60	2004	2044	2084	96	96	96	96	96	96	96	96	96	96	96	96
hydropower	Portugal	Europe	Southern Europe	Bemposta II hydroelectric plant				203	operating	2011		run-of-river				TRUE	FALSE	ENGIE [40%]; Crédit Agricole Assurances [35%]; Mirova [25%]		41.3007	-6.4698	exact			Zamora	Castile and León	https://gem.wiki/Bemposta_II_hydroelectric_plant	L603193	G603228	FR0010208488	0.4	203	203	13	2051	2091	2131	81.2	81.2	81.2	81.2	81.2	81.2	81.2	81.2	81.2	81.2	81.2	81.2
hydropower	Belgium	Europe	Western Europe	Coo I hydroelectric plant				474	operating	1972		pumped storage				TRUE	FALSE	ENGIE		50.3846	5.8616	exact		Verviers		Liège	https://gem.wiki/Coo_I_hydroelectric_plant	L600149	G600149	FR0010208488	1	474	474	52	2012	2052	2092	474	474	474	474	474	474	474	474	474	474	474	474
hydropower	Belgium	Europe	Western Europe	Coo II hydroelectric plant				690	operating	1972		pumped storage				TRUE	FALSE	ENGIE		50.3846	5.8616	exact		Verviers		Liège	https://gem.wiki/Coo_II_hydroelectric_plant	L600150	G600150	FR0010208488	1	690	690	52	2012	2052	2092	690	690	690	690	690	690	690	690	690	690	690	690
hydropower	United Kingdom	Europe	Northern Europe	Dinorwig hydroelectric plant				2016	operating	1984		run-of-river				TRUE	FALSE	ENGIE		53.1206	-4.1153	exact		Gwynedd		Wales	https://gem.wiki/Dinorwig_hydroelectric_plant	L603700	G603738	FR0010208488	1	2016	2016	40	2024	2064	2104	2016	2016	2016	2016	2016	2016	2016	2016	2016	2016	2016	2016
hydropower	United Kingdom	Europe	Northern Europe	Ffestiniog hydroelectric plant				384	operating	1963		run-of-river				TRUE	FALSE	ENGIE		52.9808	-3.9686	exact		Gwynedd		Wales	https://gem.wiki/Ffestiniog_hydroelectric_plant	L603704	G603742	FR0010208488	1	384	384	61	2003	2043	2083	384	384	384	384	384	384	384	384	384	384	384	384
hydropower	Portugal	Europe	Southern Europe	Foz Tua hydroelectric plant				268	operating	2017		pumped storage				TRUE	FALSE	ENGIE [40%]; Crédit Agricole Assurances [35%]; Mirova [25%]		41.2188	-7.4229	exact		Vila Real			https://gem.wiki/Foz_Tua_hydroelectric_plant	L603199	G603234	FR0010208488	0.4	268	268	7	2057	2097	2137	107.2	107.2	107.2	107.2	107.2	107.2	107.2	107.2	107.2	107.2	107.2	107.2
hydropower	France	Europe	Western Europe	Maregès hydroelectric plant				146	operating	1935		run-of-river				TRUE	FALSE	ENGIE		45.3917	2.3646	exact		Corrèze		Nouvelle-Aquitaine	https://gem.wiki/Maregès_hydroelectric_plant	L601656	G601675	FR0010208488	1	146	146	89	1975	2015	2055	146	146	146	146	146	146	146	146	146	146	146	146
hydropower	Portugal	Europe	Southern Europe	Miranda Douro hydroelectric plant			Miranda	180	operating	1960		run-of-river				TRUE	FALSE	ENGIE [40%]; Crédit Agricole Assurances [35%]; Mirova [25%]		41.4898	-6.2639	exact	Miranda do Douro	Bragança			https://gem.wiki/Miranda_Douro_hydroelectric_plant	L603202	G603237	FR0010208488	0.4	180	180	64	2000	2040	2080	72	72	72	72	72	72	72	72	72	72	72	72
hydropower	Portugal	Europe	Southern Europe	Miranda II hydroelectric plant				189	operating	1995		run-of-river				TRUE	FALSE	ENGIE [40%]; Crédit Agricole Assurances [35%]; Mirova [25%]		41.4889	-6.2639	exact	Miranda do Douro	Bragança			https://gem.wiki/Miranda_II_hydroelectric_plant	L603203	G603238	FR0010208488	0.4	189	189	29	2035	2075	2115	75.6	75.6	75.6	75.6	75.6	75.6	75.6	75.6	75.6	75.6	75.6	75.6
hydropower	Portugal	Europe	Southern Europe	Picote hydroelectric plant				195	operating	1958		run-of-river				TRUE	FALSE	ENGIE [40%]; Crédit Agricole Assurances [35%]; Mirova [25%]		41.3783	-6.3516	exact	Miranda do Douro	Bragança			https://gem.wiki/Picote_hydroelectric_plant	L604096	G604135	FR0010208488	0.4	195	195	66	1998	2038	2078	78	78	78	78	78	78	78	78	78	78	78	78
hydropower	Portugal	Europe	Southern Europe	Picote II hydroelectric plant				245	operating	2011		run-of-river				TRUE	FALSE	ENGIE [40%]; Crédit Agricole Assurances [35%]; Mirova [25%]		41.3783	-6.3516	exact	Miranda do Douro	Bragança			https://gem.wiki/Picote_II_hydroelectric_plant	L604097	G604136	FR0010208488	0.4	245	245	13	2051	2091	2131	98	98	98	98	98	98	98	98	98	98	98	98
hydropower	Peru	Americas	Latin America and the Caribbean	Quitarasca hydroelectric plant		Central Hidroeléctrica Quitarasca		114	operating	2016		run-of-river				TRUE	FALSE	ENGIE Energía Perú SA		-9.5001	-77.7501	approximate			Quitarasca	Ancash	https://gem.wiki/Quitarasca_hydroelectric_plant	L603114	G603149	FR0010208488	1	114	114	8	2056	2096	2136	114	114	114	114	114	114	114	114	114	114	114	114
hydropower	Germany	Europe	Western Europe	Reisach hydroelectric plant				107	operating	1955		pumped storage				TRUE	FALSE	ENGIE		49.5302	12.2846	exact		Landkreis Schwandorf		Bavaria	https://gem.wiki/Reisach_hydroelectric_plant	L601736	G601755	FR0010208488	1	107	107	69	1995	2035	2075	107	107	107	107	107	107	107	107	107	107	107	107
hydropower	France	Europe	Western Europe	Saint Pierre hydroelectric plant			St Pierre de Marèges	122	operating			run-of-river				TRUE	FALSE	ENGIE		45.3906	2.3663	exact		Corrèze		Nouvelle-Aquitaine	https://gem.wiki/Saint_Pierre_hydroelectric_plant	L601678	G601697	FR0010208488	1	122	122	-99	40	80	120	122	122	122	122	122	122	122	122	122	122	122	122
hydropower	Peru	Americas	Latin America and the Caribbean	Yucán hydroelectric plant		Central Hidroeléctrica Yucán		130	operating	2005		conventional storage				TRUE	FALSE	ENGIE		-10.7222	-75.6441	exact				Pasco	https://gem.wiki/Yucán_hydroelectric_plant	L603133	G603168	FR0010208488	1	130	130	19	2045	2085	2125	130	130	130	130	130	130	130	130	130	130	130	130
solar	United States	Americas	Northern America	ANSON Solar Center			Sand Fork Solar	200	operating	2021		PV						ENGIE		32.811	-99.9175	exact	Anson	Jones County		Texas	https://gem.wiki/ANSON_Solar_Center	L804456	G805123	FR0010208488	1	200	200	3	2061	2101	2141	0	200	200	200	200	200	200	200	200	200	200	200
solar	United States	Americas	Northern America	Azure Sky Solar				225	operating	2021		PV						ENGIE		33.02	-99.595	exact	Haskell	Haskell County		Texas	https://gem.wiki/Azure_Sky_Solar	L805049	G805820	FR0010208488	1	225	225	3	2061	2101	2141	0	225	225	225	225	225	225	225	225	225	225	225
solar	India	Asia	Southern Asia	Bhadla (Engie) Solar Park				190	operating	2018		PV						ENGIE		27.5182	71.9306	approximate	Bhadla		Jodhpur	Rajasthan	https://gem.wiki/Bhadla_(Engie)_Solar_Park	L800508	G800611	FR0010208488	1	190	190	6	2058	2098	2138	190	190	190	190	190	190	190	190	190	190	190	190
solar	United States	Americas	Northern America	Bluestone Solar				50	operating	2021		PV						ENGIE		36.8115	-78.4839	exact	Chase City	Mecklenburg County		Virginia	https://gem.wiki/Bluestone_Solar	L805050	G805821	FR0010208488	1	50	50	3	2061	2101	2141	0	50	50	50	50	50	50	50	50	50	50	50
solar	United States	Americas	Northern America	Five Wells Solar Center				355	construction	2023		PV						ENGIE		30.9986	-97.259	exact		Bell County		Texas	https://gem.wiki/Five_Wells_Solar_Center	L832896	G838513	FR0010208488	1	355	355	1	2063	2103	2143	0	0	0	355	355	355	355	355	355	355	355	355
solar	United States	Americas	Northern America	Flat Run Solar Project				55	pre-construction	2024		PV						ENGIE		37.3741	-85.353	approximate		Taylor County		Kentucky	https://gem.wiki/Flat_Run_Solar_Project	L832898	G838515	FR0010208488	1	55	55	0	2064	2104	2144	0	0	0	0	0	0	0	0	0	0	0	0
solar	United States	Americas	Northern America	Hopkins solar farm				250	pre-construction			PV						ENGIE		33.1225	-95.733	approximate		Hopkins County		Texas	https://gem.wiki/Hopkins_solar_farm	L804457	G805124	FR0010208488	1	250	250	-99	40	80	120	0	0	0	0	0	0	0	0	0	0	0	0
solar	United States	Americas	Northern America	Horseshoe Bend Solar Project				60	pre-construction	2024		PV						ENGIE		37.2644	-85.5717	approximate		Green County		Kentucky	https://gem.wiki/Horseshoe_Bend_Solar_Project	L832974	G838594	FR0010208488	1	60	60	0	2064	2104	2144	0	0	0	0	0	0	0	0	0	0	0	0
solar	India	Asia	Southern Asia	Kadapa (Engie) Ultra Mega Solar Park	1			200	operating	2019		PV						ENGIE		14.9185	78.2867	approximate			Kadapa	Andhra Pradesh	https://gem.wiki/Kadapa_(Engie)_Ultra_Mega_Solar_Park	L800509	G800612	FR0010208488	1	250		5	2059	2099	2139	200	200	200	200	200	200	200	200	200	200	200	200
solar	India	Asia	Southern Asia	Kadapa (Engie) Ultra Mega Solar Park	2			50	operating	2020		PV						ENGIE		14.9185	78.2867	approximate			Kadapa	Andhra Pradesh	https://gem.wiki/Kadapa_(Engie)_Ultra_Mega_Solar_Park	L800509	G800613	FR0010208488	1	250	250	4	2060	2100	2140	50	50	50	50	50	50	50	50	50	50	50	50
solar	United States	Americas	Northern America	Long Draw Solar			ENGIE Long Draw Solar	225	operating	2020		PV						ENGIE		32.7414	-101.622	exact		Borden County		Texas	https://gem.wiki/Long_Draw_Solar	L804458	G805125	FR0010208488	1	225	225	4	2060	2100	2140	225	225	225	225	225	225	225	225	225	225	225	225
solar	United States	Americas	Northern America	Mt. Olive Creek Solar Project				60	pre-construction	2024		PV						ENGIE		37.0133	-85.5058	approximate		Adair County		Kentucky	https://gem.wiki/Mt._Olive_Creek_Solar_Project	L833100	G838739	FR0010208488	1	60	60	0	2064	2104	2144	0	0	0	0	0	0	0	0	0	0	0	0
solar	United States	Americas	Northern America	Powells Creek (ENGIE) Solar				70	construction	2023		PV						ENGIE		36.5547	-79.0286	approximate		Halifax County		Virginia	https://gem.wiki/Powells_Creek_(ENGIE)_Solar	L808501	G810730	FR0010208488	1	70	70	1	2063	2103	2143	0	0	0	70	70	70	70	70	70	70	70	70
solar	United States	Americas	Northern America	Ridgeview Solar				50	pre-construction	2026		PV						ENGIE		39.0314	-82.6289	approximate		Jackson County		Ohio	https://gem.wiki/Ridgeview_Solar	L833217	G838899	FR0010208488	1	50		-2	2066	2106	2146	0	0	0	0	0	0	0	0	0	0	0	0
solar	United States	Americas	Northern America	Salt City Solar Project				50	construction	2023		PV						ENGIE		39.4147	-82.9629	exact		Ross County		Ohio	https://gem.wiki/Salt_City_Solar_Project	L808519	G810751	FR0010208488	1	50		1	2063	2103	2143	0	0	0	50	50	50	50	50	50	50	50	50
solar	United States	Americas	Northern America	Solaire Holman Solar Project			Brewster solar farm, Hecate Alpine Mcgill	50	operating	2017		PV						ENGIE		30.4551	-103.475	exact		Brewster County		Texas	https://gem.wiki/Solaire_Holman_Solar_Project	L804460	G805127	FR0010208488	1	50		7	2057	2097	2137	50	50	50	50	50	50	50	50	50	50	50	50
solar	United States	Americas	Northern America	Solidago (ENGIE) Solar				50	operating	2022		PV						ENGIE		39.3952	-75.7535	exact		New Castle County		Delaware	https://gem.wiki/Solidago_(ENGIE)_Solar	L808534	G810778	FR0010208488	1	50	50	2	2062	2102	2142	0	0	50	50	50	50	50	50	50	50	50	50
solar	United States	Americas	Northern America	Sunnybrook Solar Project				51	operating	2022		PV						ENGIE		36.7987	-78.8396	approximate		Halifax County		Virginia	https://gem.wiki/Sunnybrook_Solar_Project	L808540	G810784	FR0010208488	1	51	51	2	2062	2102	2142	0	0	51	51	51	51	51	51	51	51	51	51
solar	United States	Americas	Northern America	Vermillion River_MN_GRE DEA-GM solar farm				3	operating	2019		PV						ENGIE Generation North America LLC [100.0%]		44.5998	-93.1361	exact	Farmington	Dakota		Minnesota	https://gem.wiki/Vermillion_River_MN_GRE_DEA-GM_solar_farm	L815552	G818426	FR0010208488	1	3	3	5	2059	2099	2139	3	3	3	3	3	3	3	3	3	3	3	3
solar	India	Asia	Southern Asia	Vijaypura (Engie) solar farm			Dada Kala (Mirzapur)	75	operating	2018		PV						ENGIE		25.1001	82.3619	exact		Mirzapur	Mirzapur District	Uttar Pradesh	https://gem.wiki/Vijaypura_(Engie)_solar_farm	L800510	G800614	FR0010208488	1	75	75	6	2058	2098	2138	75	75	75	75	75	75	75	75	75	75	75	75
solar	United States	Americas	Northern America	Whitehorn Solar				50	operating	2021		PV						ENGIE		36.9314	-79.3587	exact	Gretna	Pittsylvania County		Virginia	https://gem.wiki/Whitehorn_Solar	L805052	G805823	FR0010208488	1	50	50	3	2061	2101	2141	0	50	50	50	50	50	50	50	50	50	50	50
wind	Canada	Americas	Northern America	AIM SOP wind farm	Clear Creek			10	operating	2008		onshore						ENGIE		42.5863	-80.5532	exact					https://gem.wiki/AIM_SOP_wind_farm	L921828	G927111	FR0010208488	1	40		16	2048	2088	2128	10	10	10	10	10	10	10	10	10	10	10	10
wind	Canada	Americas	Northern America	AIM SOP wind farm	Cultus			10	operating	2008		onshore						ENGIE		42.5871	-80.5872	exact					https://gem.wiki/AIM_SOP_wind_farm	L921828	G927112	FR0010208488	1	40		16	2048	2088	2128	10	10	10	10	10	10	10	10	10	10	10	10
wind	Canada	Americas	Northern America	AIM SOP wind farm	Frogmore			10	operating	2008		onshore						ENGIE		42.5845	-80.5595	exact					https://gem.wiki/AIM_SOP_wind_farm	L921828	G927113	FR0010208488	1	40		16	2048	2088	2128	10	10	10	10	10	10	10	10	10	10	10	10
wind	Canada	Americas	Northern America	AIM SOP wind farm	Mohawk Point			10	operating	2008		onshore						ENGIE		42.862	-79.4907	exact					https://gem.wiki/AIM_SOP_wind_farm	L921828	G927114	FR0010208488	1	40	40	16	2048	2088	2128	10	10	10	10	10	10	10	10	10	10	10	10
wind	Italy	Europe	Southern Europe	Elimi wind farm				38	operating	2022		onshore						ENGIE		37.7832	12.7163	approximate					https://gem.wiki/Elimi_wind_farm	L920402	G925066	FR0010208488	1	38	38	2	2062	2102	2142	0	0	38	38	38	38	38	38	38	38	38	38
wind	Belgium	Europe	Western Europe	Hammont-Achel wind farm			Industriezone Bosstraat	14	pre-construction			onshore						ENGIE SA		51.245	5.5093	approximate					https://gem.wiki/Hammont-Achel_wind_farm	L919310	G923801	FR0010208488	1	14	14	-99	40	80	120	0	0	0	0	0	0	0	0	0	0	0	0
wind	United Kingdom	Europe	Northern Europe	Moray East wind farm				950	operating	2022		offshore hard mount						EDP Renewables; ENGIE; China Three Gorges CORP (CTG); Diamond Green LTD; INPEX CORP [16.7%]		58.188	-2.72	approximate				Scotland	https://gem.wiki/Moray_East_wind_farm	L916287	G920099	FR0010208488	0.2	950	950	2	2062	2102	2142	0	0	190	190	190	190	190	190	190	190	190	190
wind	United Kingdom	Europe	Northern Europe	Moray West wind farm				882	pre-construction	2024		offshore mount unknown						EDP Renewables [50%]; ENGIE [50%]		58.0699	-3.3131	exact					https://gem.wiki/Moray_West_wind_farm	L916288	G920100	FR0010208488	0.5	882	882	0	2064	2104	2144	0	0	0	0	0	0	0	0	0	0	0	0
wind	India	Asia	Southern Asia	Tihitwa wind farm				30	operating	2017		onshore						ENGIE		22.8177	70.8346	approximate		Tithwa	Morbi	Gujarat	https://gem.wiki/Tihitwa_wind_farm	L900316	G900382	FR0010208488	1	30	30	7	2057	2097	2137	30	30	30	30	30	30	30	30	30	30	30	30
wind	India	Asia	Southern Asia	Tuticorin (Engie) wind farm				252	operating	2019		onshore						ENGIE		8.8053	78.1453	approximate			Tuticorin	Tamil Nadu	https://gem.wiki/Tuticorin_(Engie)_wind_farm	L900317	G900383	FR0010208488	1	252	252	5	2059	2099	2139	252	252	252	252	252	252	252	252	252	252	252	252
																																		467	467	0	0	31769.1	32136.2	31677.7	32152.7	32152.7	33475.3	33475.3	33488.8	33488.8	33488.8	33488.8	33488.8
																																					Coal	2168.74	1977.1	1574.1	1574.1	1574.1	1574.1	1574.1	1574.1	1574.1	1574.1	1574.1	1574.1
																																					Oil&Gas	23617.9	23617.9	23233.4	23233.4	23233.4	24483.4	24483.4	24483.4	24483.4	24483.4	24483.4	24483.4
																																					Fossil fuel	25786.6	25595	24807.5	24807.5	24807.5	26057.5	26057.5	26057.5	26057.5	26057.5	26057.5	26057.5
																																					Renewables	5982.5	6541.17	6870.17	7345.17	7345.17	7417.77	7417.77	7431.27	7431.27	7431.27	7431.27	7431.27
																																					Oil	2487.02	2487.02	2432.02	2432.02	2432.02	2432.02	2432.02	2432.02	2432.02	2432.02	2432.02	2432.02
																																					Gas	22294.9	22294.9	21910.4	21910.4	21910.4	23160.4	23160.4	23160.4	23160.4	23160.4	23160.4	23160.4
																																					Nuclear	0	0	0	0	0	0	0	0	0	0	0	0
																																					Wind	322	322	550	550	550	550	550	550	550	550	550	550
																																					solar	793	1318	1419	1894	1894	1894	1894	1894	1894	1894	1894	1894
																																					hydropower	4852.2	4852.2	4852.2	4852.2	4852.2	4852.2	4852.2	4852.2	4852.2	4852.2	4852.2	4852.2
																																					geothermal	15.3	48.97	48.97	48.97	48.97	121.57	121.57	135.07	135.07	135.07	135.07	135.07
																																					Total capacity without discounts	53847	53781	53752	54227
																																					Total capacity without discounts	46791	46109	44991	44991
[truncated: 19 more columns]

## Sheet: Engie_TP
Type	Country/area	Region	Subregion	Plant / Project name	Unit / Phase name	Plant / Project name (local)	Plant / Project name (other)	Capacity (MW)	Status	Start year	Retired year	Technology	Fuel	Country/area 1 (hydropower only)	Country/area 2 (hydropower only)	Country/area 1 Capacity (MW) (hydropower only)	Country/area 2 Capacity (MW) (hydropower only)	Owner	Parent	Latitude	Longitude	Location accuracy	City	Local area (taluk, county)	Major area (prefecture, district)	Subnational unit (state, province)	GEM.Wiki URL	GEM location ID	GEM unit/phase ID	CompISIN	Ownership	Plant capacity	Plant capacity	Age	Reinvestment year	Reinvestment year	Reinvestment year	2020	2021	2022	2023	2024	2025	2026	2027	2028	2029	2030	2031
coal	Chile	Americas	Latin America and the Caribbean	Andina-Hornitos power station	Unit 1	Termoeléctrica Andina-Hornitos	Andina power station (Unit 1), Central Termoeléctrica Andina (CTA) (Unit 1), Central Termoeléctrica Hornitos (CTH) (Unit 2), Hornitos power station (Unit 2)	177	operating	2011	2025	CFB	bituminous					ENGIE Energía Chile [100%]	ENGIE Energía Chile [100.0%]	-23.0877	-70.4075	exact	Mejillones			Antofagasta Region	https://www.gem.wiki/Andina-Hornitos_power_station	L100000100181	G100000100194	FR0010208488	1	355		13	2051	2091	2131	177	177	177	177	177	0	0	0	0	0	0	0
coal	Chile	Americas	Latin America and the Caribbean	Andina-Hornitos power station	Unit 2	Termoeléctrica Andina-Hornitos	Andina power station (Unit 1), Central Termoeléctrica Andina (CTA) (Unit 1), Central Termoeléctrica Hornitos (CTH) (Unit 2), Hornitos power station (Unit 2)	178	operating	2012	2025	CFB	bituminous					ENGIE Energía Chile [100%]	ENGIE Energía Chile [100.0%]	-23.0877	-70.4075	exact	Mejillones			Antofagasta Region	https://www.gem.wiki/Andina-Hornitos_power_station	L100000100181	G100000100195	FR0010208488	1	355	355	12	2052	2092	2132	178	178	178	178	178	0	0	0	0	0	0	0
coal	France	Europe	Western Europe	Goro power station	Unit 1			50	operating	2008	2025	subcritical	unknown					Prony Énergies [100%]	ENERCAL SA [75.0%]; ENGIE SA [25.0%]	-22.3302	166.912	exact	Goro	Le Mont-Dore Municipality	Sud	New Caledonia	https://www.gem.wiki/Goro_power_station	L100000104548	G100000114107	FR0010208488	0.25	100		16	2048	2088	2128	12.5	12.5	12.5	12.5	12.5	0	0	0	0	0	0	0
coal	France	Europe	Western Europe	Goro power station	Unit 2			50	operating	2008	2025	subcritical	unknown					Prony Énergies [100%]	ENERCAL SA [75.0%]; ENGIE SA [25.0%]	-22.3302	166.912	exact	Goro	Le Mont-Dore Municipality	Sud	New Caledonia	https://www.gem.wiki/Goro_power_station	L100000104548	G100000114108	FR0010208488	0.25	100	100	16	2048	2088	2128	12.5	12.5	12.5	12.5	12.5	0	0	0	0	0	0	0
coal	Peru	Americas	Latin America and the Caribbean	Ilo power station	Unit 1	Central Termoeléctrica de Ilo	Ilo 21	135	retired	1999	2022	subcritical	bituminous					ENGIE Energía Perú [100%]	ENGIE Energía Perú [100.0%]	-17.776	-71.1893	exact	Ilo	Pacocha	Ilo	Moquegua	https://www.gem.wiki/Ilo_power_station	L100000103158	G100000104832	FR0010208488	1	1425	1425	25	2039	2079	2119	135	135	0	0	0	0	0	0	0	0	0	0
coal	Chile	Americas	Latin America and the Caribbean	Mejillones power station	Unit 1	Termoeléctrica Mejillones	Infraestructura Energética de Mejillones, IEM1 (Unit 4), IEM2 (Unit 5), Red Dragon (Unit 4, Unit 5)	160	operating	1996	2024	subcritical	bituminous					ENGIE Energía Chile [100%]	ENGIE Energía Chile [100.0%]	-23.0892	-70.4103	exact	Mejillones		Antofagasta	Antofagasta Region	https://www.gem.wiki/Mejillones_power_station	L100000100184	G100000106831	FR0010208488	1	1329		28	2036	2076	2116	160	160	160	160	0	0	0	0	0	0	0	0
coal	Chile	Americas	Latin America and the Caribbean	Mejillones power station	Unit 2	Termoeléctrica Mejillones	Infraestructura Energética de Mejillones, IEM1 (Unit 4), IEM2 (Unit 5), Red Dragon (Unit 4, Unit 5)	174	operating	1998	2024	subcritical	bituminous					ENGIE Energía Chile [100%]	ENGIE Energía Chile [100.0%]	-23.0892	-70.4103	exact	Mejillones		Antofagasta	Antofagasta Region	https://www.gem.wiki/Mejillones_power_station	L100000100184	G100000106832	FR0010208488	1	1329		26	2038	2078	2118	174	174	174	174	0	0	0	0	0	0	0	0
coal	Chile	Americas	Latin America and the Caribbean	Mejillones power station	Unit 4	Termoeléctrica Mejillones	Infraestructura Energética de Mejillones, IEM1 (Unit 4), IEM2 (Unit 5), Red Dragon (Unit 4, Unit 5)	375	operating	2019	2025	subcritical	bituminous					ENGIE Energía Chile [100%]	ENGIE Energía Chile [100.0%]	-23.0892	-70.4103	exact	Mejillones		Antofagasta	Antofagasta Region	https://www.gem.wiki/Mejillones_power_station	L100000100184	G100000106833	FR0010208488	1	1329	1329	5	2059	2099	2139	375	375	375	375	375	0	0	0	0	0	0	0
coal	Portugal	Europe	Southern Europe	Pego power station	Unit 1			341	retired	1992	2021	subcritical	bituminous					Tejo Energia [100%]	Endesa SA [43.8%]; ENGIE SA [28.1%]; Marubeni Corp [28.1%]	39.4682	-8.10923	exact	Pego	Abrantes	Médio Tejo	Santarém	https://www.gem.wiki/Pego_power_station	L100000103283	G100000107913	FR0010208488	0.281	682		32	2032	2072	2112	95.821	0	0	0	0	0	0	0	0	0	0	0
coal	Portugal	Europe	Southern Europe	Pego power station	Unit 2			341	retired	1995	2021	subcritical	bituminous					Tejo Energia [100%]	Endesa SA [43.8%]; ENGIE SA [28.1%]; Marubeni Corp [28.1%]	39.4682	-8.10923	exact	Pego	Abrantes	Médio Tejo	Santarém	https://www.gem.wiki/Pego_power_station	L100000103283	G100000107914	FR0010208488	0.281	682	682	29	2035	2075	2115	95.821	0	0	0	0	0	0	0	0	0	0	0
coal	Morocco	Africa	Northern Africa	Safi power station	Unit 1			693	operating	2018		ultra-supercritical	unknown					Safi Energy Company [100%]	ENGIE SA [35.0%]; Nareva Holding SA [35.0%]; Mitsui & Co Ltd [30.0%]	32.1491	-9.28229	exact	Cap Ghir Safi			Souss-Massa	https://www.gem.wiki/Safi_power_station	L100000103053	G100000108700	FR0010208488	0.35	1386		6	2058	2098	2138	242.55	242.55	242.55	242.55	242.55	242.55	242.55	0	0	0	0	0
coal	Morocco	Africa	Northern Africa	Safi power station	Unit 2			693	operating	2018		ultra-supercritical	unknown					Safi Energy Company [100%]	ENGIE SA [35.0%]; Nareva Holding SA [35.0%]; Mitsui & Co Ltd [30.0%]	32.1491	-9.28229	exact	Cap Ghir Safi			Souss-Massa	https://www.gem.wiki/Safi_power_station	L100000103053	G100000108701	FR0010208488	0.35	1386	1386	6	2058	2098	2138	242.55	242.55	242.55	242.55	242.55	242.55	242.55	0	0	0	0	0
coal	Chile	Americas	Latin America and the Caribbean	Tocopilla power station	Unit 14	Termoeléctrica Tocopilla		136	retired	1987	2022	subcritical	subbituminous					ENGIE Energía Chile [100%]	ENGIE Energía Chile [100.0%]	-22.0964	-70.2118	exact	Tocopilla		Tocopilla	Antofagasta Region	https://www.gem.wiki/Tocopilla_power_station	L100000100186	G100000110211	FR0010208488	1	662		37	2027	2067	2107	136	136	0	0	0	0	0	0	0	0	0	0
coal	Chile	Americas	Latin America and the Caribbean	Tocopilla power station	Unit 15	Termoeléctrica Tocopilla		132	retired	1990	2022	subcritical	subbituminous					ENGIE Energía Chile [100%]	ENGIE Energía Chile [100.0%]	-22.0964	-70.2118	exact	Tocopilla		Tocopilla	Antofagasta Region	https://www.gem.wiki/Tocopilla_power_station	L100000100186	G100000110212	FR0010208488	1	662	662	34	2030	2070	2110	132	132	0	0	0	0	0	0	0	0	0	0
oil/gas	Belgium	Europe	Western Europe	Aalst Syral power station	1			48	operating	2000		CC	NG					Electrabel NV/SA [100%]	ENGIE SA [100.0%]	50.9355	4.04516	exact	Aalst			East Flanders	https://www.gem.wiki/Aalst_Syral_power_station	L100000400016	G100000400016	FR0010208488	1	48	48	24	2040	2080	2120	48	48	48	48	48	48	48	48	48	48	48	48
oil/gas	Bahrain	Asia	Western Asia	Al Ezzel power station	CC1	محطة العزل لإنتاج الكهرباء	El Ezzel CCGT Power Plant Bahrain	471	operating	2007		CC	NG					Al Ezzel Power Company BSC [100.0%]	ENGIE SA [45.0%]; Gulf Investment Corp [45.0%]; Social Insurance Organization (Bahrain)	26.2175	50.6595	exact	Al Hidd			Muharraq	https://www.gem.wiki/Al_Ezzel_power_station	L100000405455	G100000404587	FR0010208488	0.45	942		17	2047	2087	2127	211.95	211.95	211.95	211.95	211.95	211.95	211.95	211.95	211.95	211.95	211.95	211.95
oil/gas	Bahrain	Asia	Western Asia	Al Ezzel power station	CC2	محطة العزل لإنتاج الكهرباء	El Ezzel CCGT Power Plant Bahrain	471	operating	2007		CC	NG					Al Ezzel Power Company BSC [100.0%]	ENGIE SA [45.0%]; Gulf Investment Corp [45.0%]; Social Insurance Organization (Bahrain)	26.2175	50.6595	exact	Al Hidd			Muharraq	https://www.gem.wiki/Al_Ezzel_power_station	L100000405455	G100000404588	FR0010208488	0.45	942	942	17	2047	2087	2127	211.95	211.95	211.95	211.95	211.95	211.95	211.95	211.95	211.95	211.95	211.95	211.95
oil/gas	Bahrain	Asia	Western Asia	Al Hidd Power and Water Station	1	محطة الحد لإنتاج الكهرباء	Al Hidd power plant/Al-Hidd IWPP	987	operating	2003		CC	NG					Hidd Power Company BSC [100.0%]	Malakoff Corporation Bhd [40.0%]; ENGIE SA [30.0%]; Sumitomo Corp [30.0%]	26.2223	50.6621	exact	Al Hidd			Muharraq	https://www.gem.wiki/Al_Hidd_Power_and_Water_Station	L100000405457	G100000404589	FR0010208488	0.3	987	987	21	2043	2083	2123	296.1	296.1	296.1	296.1	296.1	296.1	296.1	296.1	296.1	296.1	296.1	296.1
oil/gas	Belgium	Europe	Western Europe	Amercoeur power station	1			451	operating	2010		CC	NG					Electrabel NV/SA [100%]	ENGIE SA [100.0%]	50.4304	4.3955	exact	Roux			Hainaut	https://www.gem.wiki/Amercoeur_power_station	L100000100087	G100000400017	FR0010208488	1	771		14	2050	2090	2130	451	451	451	451	451	451	451	451	451	451	451	451
oil/gas	Belgium	Europe	Western Europe	Amercoeur power station	2			320	shelved	2025		GT	NG					Electrabel NV/SA [100%]	ENGIE SA [100.0%]	50.4304	4.3955	exact	Roux			Hainaut	https://www.gem.wiki/Amercoeur_power_station	L100000100087	G100000406282	FR0010208488	1	771	771	-1	2065	2105	2145	0	0	0	0	0	0	0	0	0	0	0	0
oil/gas	Italy	Europe	Southern Europe	Arkema Marghera power station	1			20	operating	2013		ST	NG					Engie Servizi SpA [100.0%]	ENGIE SA [100.0%]	45.4502	12.2259	exact	Porto Marghera			Venice	https://www.gem.wiki/Arkema_Marghera_power_station	L100000400343	G100000400343	FR0010208488	1	20	20	11	2053	2093	2133	20	20	20	20	20	20	20	20	20	20	20	20
oil/gas	United States	Americas	Northern America	Astoria Energy II power station	CC1			650	operating	2011		CC	NG/FO					Astoria Energy II LLC [100.0%]	Algemene Pensioen Groep NV; Bank HaPoalim; Clal Insurance Enterprises Holdings Ltd; ENGIE SA; Harbert-managed funds; IDB Development Group; Munich RE Co; SNC-Lavalin; other	40.7813	-73.8966	exact	Astoria	Queens		New York	https://www.gem.wiki/Astoria_Energy_II_power_station	L100000401729	G100000402047	FR0010208488	0.111111	650	650	13	2051	2091	2131	72.2222	72.2222	72.2222	72.2222	72.2222	72.2222	72.2222	72.2222	72.2222	72.2222	72.2222	72.2222
oil/gas	South Africa	Africa	Sub-Saharan Africa	Avon power station	1			167.5	operating	2016		GT	NG/D					Avon Peaking Power (RF) Pty Ltd [100.0%]	ENGIE SA [38.0%]; Legend Power Solutions Pty Ltd [27.0%]; Mitsui & Co Ltd [25.0%]; The Peaker Trust [10.0%]	-29.4189	31.1577	exact	Ballito			KwaZulu-Natal	https://www.gem.wiki/Avon_power_station	L100000407110	G100000408559	FR0010208488	0.38	670		8	2056	2096	2136	63.65	63.65	63.65	63.65	63.65	63.65	63.65	63.65	63.65	63.65	63.65	63.65
oil/gas	South Africa	Africa	Sub-Saharan Africa	Avon power station	2			167.5	operating	2016		GT	NG/D					Avon Peaking Power (RF) Pty Ltd [100.0%]	ENGIE SA [38.0%]; Legend Power Solutions Pty Ltd [27.0%]; Mitsui & Co Ltd [25.0%]; The Peaker Trust [10.0%]	-29.4189	31.1577	exact	Ballito			KwaZulu-Natal	https://www.gem.wiki/Avon_power_station	L100000407110	G100000414451	FR0010208488	0.38	670		8	2056	2096	2136	63.65	63.65	63.65	63.65	63.65	63.65	63.65	63.65	63.65	63.65	63.65	63.65
oil/gas	South Africa	Africa	Sub-Saharan Africa	Avon power station	3			167.5	operating	2016		GT	NG/D					Avon Peaking Power (RF) Pty Ltd [100.0%]	ENGIE SA [38.0%]; Legend Power Solutions Pty Ltd [27.0%]; Mitsui & Co Ltd [25.0%]; The Peaker Trust [10.0%]	-29.4189	31.1577	exact	Ballito			KwaZulu-Natal	https://www.gem.wiki/Avon_power_station	L100000407110	G100000414450	FR0010208488	0.38	670		8	2056	2096	2136	63.65	63.65	63.65	63.65	63.65	63.65	63.65	63.65	63.65	63.65	63.65	63.65
oil/gas	South Africa	Africa	Sub-Saharan Africa	Avon power station	4			167.5	operating	2016		GT	NG/D					Avon Peaking Power (RF) Pty Ltd [100.0%]	ENGIE SA [38.0%]; Legend Power Solutions Pty Ltd [27.0%]; Mitsui & Co Ltd [25.0%]; The Peaker Trust [10.0%]	-29.4189	31.1577	exact	Ballito			KwaZulu-Natal	https://www.gem.wiki/Avon_power_station	L100000407110	G100000414449	FR0010208488	0.38	670	670	8	2056	2096	2136	63.65	63.65	63.65	63.65	63.65	63.65	63.65	63.65	63.65	63.65	63.65	63.65
oil/gas	Germany	Europe	Western Europe	Barmen power station	GT1		Wuppertal-Barmen	34	mothballed	1978		GT	NG/HFO					WSW Energie & Wasser AG [100.0%]	WSW Wuppertaler Stadtwerke GmbH [66.9%]; ENGIE SA [33.1%]	51.2689	7.2003	exact	Wuppertal			Nordrhein-Westfalen	https://www.gem.wiki/Barmen_power_station	L100000400114	G100000412908	FR0010208488	0.331	156		46	2018	2058	2098	0	0	0	0	0	0	0	0	0	0	0	0
oil/gas	Germany	Europe	Western Europe	Barmen power station	GT2		Wuppertal-Barmen	34	mothballed	1978		GT	NG/HFO					WSW Energie & Wasser AG [100.0%]	WSW Wuppertaler Stadtwerke GmbH [66.9%]; ENGIE SA [33.1%]	51.2689	7.2003	exact	Wuppertal			Nordrhein-Westfalen	https://www.gem.wiki/Barmen_power_station	L100000400114	G100000412907	FR0010208488	0.331	156		46	2018	2058	2098	0	0	0	0	0	0	0	0	0	0	0	0
oil/gas	Germany	Europe	Western Europe	Barmen power station	CC1		Wuppertal-Barmen	88	operating	2005		CC	NG					WSW Energie & Wasser AG [100.0%]	WSW Wuppertaler Stadtwerke GmbH [66.9%]; ENGIE SA [33.1%]	51.2689	7.2003	exact	Wuppertal			Nordrhein-Westfalen	https://www.gem.wiki/Barmen_power_station	L100000400114	G100000400114	FR0010208488	0.331	156	156	19	2045	2085	2125	29.128	29.128	29.128	29.128	29.128	29.128	29.128	29.128	29.128	29.128	29.128	29.128
oil/gas	Belgium	Europe	Western Europe	Beerse power station	IC			33	operating			ICCC	HFO					Electrabel NV/SA	ENGIE SA	51.3261	4.853	exact					https://www.gem.wiki/Beerse_power_station	L100001000036	G100001000101	FR0010208488	1	33	33	-99	40	80	120	33	33	33	33	33	33	33	33	33	33	33	33
oil/gas	Netherlands	Europe	Western Europe	Bergum power station	10GT			72	operating	2019		GT	NG					Engie Energie Nederland NV [100%]	ENGIE SA [100.0%]	53.2097	6.02959	exact	Bergum			Friesland	https://www.gem.wiki/Bergum_power_station	L100000400499	G100000409942	FR0010208488	1	808		5	2059	2099	2139	72	72	72	72	72	72	72	72	72	72	72	72
oil/gas	Netherlands	Europe	Western Europe	Bergum power station	20GT			72	operating	2019		GT	NG					Engie Energie Nederland NV [100%]	ENGIE SA [100.0%]	53.2097	6.02959	exact	Bergum			Friesland	https://www.gem.wiki/Bergum_power_station	L100000400499	G100000409941	FR0010208488	1	808		5	2059	2099	2139	72	72	72	72	72	72	72	72	72	72	72	72
oil/gas	Netherlands	Europe	Western Europe	Bergum power station	10			332	mothballed			CC	NG					Engie Energie Nederland NV [100%]	ENGIE SA [100.0%]	53.2097	6.02959	exact	Bergum			Friesland	https://www.gem.wiki/Bergum_power_station	L100000400499	G100000400499	FR0010208488	1	808		-99	40	80	120	0	0	0	0	0	0	0	0	0	0	0	0
oil/gas	Netherlands	Europe	Western Europe	Bergum power station	20			332	mothballed			CC	NG					Engie Energie Nederland NV [100%]	ENGIE SA [100.0%]	53.2097	6.02959	exact	Bergum			Friesland	https://www.gem.wiki/Bergum_power_station	L100000400499	G100000400500	FR0010208488	1	808	808	-99	40	80	120	0	0	0	0	0	0	0	0	0	0	0	0
oil/gas	Belgium	Europe	Western Europe	Beveren Ineos Phenolchemie power station	1			23.8	operating	1993		GT	NG					Electrabel NV/SA [100%]	ENGIE SA [100.0%]	51.2909	4.27025	exact	Beveren			East Flanders	https://www.gem.wiki/Beveren_Ineos_Phenolchemie_power_station	L100000400023	G100000400023	FR0010208488	1	23.8	23.8	31	2033	2073	2113	23.8	23.8	23.8	23.8	23.8	23.8	23.8	23.8	23.8	23.8	23.8	23.8
oil/gas	Italy	Europe	Southern Europe	Boffalora power station	1			88	operating	1988		CC	NG					Engie Servizi SpA [100.0%]	ENGIE SA [100.0%]	45.456	8.79646	approximate	Boffalora Sopra Ticino			Milan	https://www.gem.wiki/Boffalora_power_station	L100000400352	G100000400352	FR0010208488	1	88	88	36	2028	2068	2108	88	88	88	88	88	88	88	88	88	88	88	0
oil/gas	United States	Americas	Northern America	Calumet Energy Team power station	CT11			156	operating	2002		GT	NG					Engie North America [100.0%]	ENGIE SA [100.0%]	41.6835	-87.5563	exact	Chicago	Cook		Illinois	https://www.gem.wiki/Calumet_Energy_Team_power_station	L100000401565	G100000402272	FR0010208488	1	312		22	2042	2082	2122	156	156	156	156	156	156	156	156	156	156	156	156
oil/gas	United States	Americas	Northern America	Calumet Energy Team power station	CT12			156	operating	2002		GT	NG					Engie North America [100.0%]	ENGIE SA [100.0%]	41.6835	-87.5563	exact	Chicago	Cook		Illinois	https://www.gem.wiki/Calumet_Energy_Team_power_station	L100000401565	G100000402273	FR0010208488	1	312	312	22	2042	2082	2122	156	156	156	156	156	156	156	156	156	156	156	156
oil/gas	Italy	Europe	Southern Europe	Castelmassa power station	1			54	operating	1994		CC	NG					Engie Servizi SpA [100.0%]	ENGIE SA [100.0%]	45.0213	11.3116	exact	Castelmassa			Rovigo	https://www.gem.wiki/Castelmassa_power_station	L100000400364	G100000400364	FR0010208488	1	54	54	30	2034	2074	2114	54	54	54	54	54	54	54	54	54	54	54	54
oil/gas	Peru	Americas	Latin America and the Caribbean	Chilca power station	1	Central Termoeléctrica Chilca		852	operating	2012		CC	NG					ENGIE Energía Perú SA [100%]	ENGIE Energía Perú SA [100.0%]	-12.5024	-76.729	exact	Chilca		Cañete	Lima	https://gem.wiki/Chilca_power_station	L100000406603	G100000406665	FR0010208488	1	963		12	2052	2092	2132	852	852	852	852	852	852	852	852	852	852	852	852
oil/gas	Peru	Americas	Latin America and the Caribbean	Chilca power station	2	Central Termoeléctrica Chilca		111	operating	2016		CC	NG					ENGIE Energía Perú SA [100%]	ENGIE Energía Perú SA [100.0%]	-12.5024	-76.729	exact	Chilca		Cañete	Lima	https://gem.wiki/Chilca_power_station	L100000406603	G100000406666	FR0010208488	1	963	963	8	2056	2096	2136	111	111	111	111	111	111	111	111	111	111	111	111
oil/gas	France	Europe	Western Europe	Combigolfe power station	1	GRACIT01 - GROUPE 01 DE LA CENTRALE THERMIQUE DE GRACIEUSE (LA)		425	operating	2010		CC	NG					Engie Energy France [100.0%]	ENGIE SA [100.0%]	43.4072	4.8676	exact	Fos-sur-Mer			Bouches-du-Rhone	https://www.gem.wiki/Combigolfe_power_station	L100000400093	G100000400093	FR0010208488	1	425	425	14	2050	2090	2130	425	425	425	425	425	425	425	425	425	425	425	425
oil/gas	Belgium	Europe	Western Europe	Covestro Oorderen power station	1		Antwerp Bayer/Oorderen Bayer	43	operating			GT	NG					Electrabel NV/SA [100%]	ENGIE SA [100.0%]	51.297	4.31907	approximate	Antwerp			Antwerp	https://www.gem.wiki/Covestro_Oorderen_power_station	L100000406369	G100000406275	FR0010208488	1	43	43	-99	40	80	120	43	43	43	43	43	43	43	43	43	43	43	43
oil/gas	France	Europe	Western Europe	Cycofos power station	1			428	operating	2009		CC	NG					CyCoFos [100.0%]	ENGIE SA [100.0%]	43.428	4.88652	exact	Fos-sur-Mer			Bouches-du-Rhone	https://www.gem.wiki/Cycofos_power_station	L100000400095	G100000400095	FR0010208488	1	428	428	15	2049	2089	2129	428	428	428	428	428	428	428	428	428	428	428	428
oil/gas	South Africa	Africa	Sub-Saharan Africa	Dedisa power station	1			335	operating	2015		CC	NG/D					Dedisa Peaking Power (RF) Pty Ltd [100.0%]	ENGIE SA [38.0%]; Legend Power Solutions Pty Ltd [27.0%]; Mitsui & Co Ltd [25.0%]; The Peaker Trust [10.0%]	-33.7434	25.6728	exact	Gqeberha			Eastern Cape	https://www.gem.wiki/Dedisa_power_station	L100000407109	G100000408558	FR0010208488	0.38	335	335	9	2055	2095	2135	127.3	127.3	127.3	127.3	127.3	127.3	127.3	127.3	127.3	127.3	127.3	127.3
oil/gas	Belgium	Europe	Western Europe	Drogenbos power station	1			460	operating	1993		CC	NG					Electrabel NV/SA [100%]	ENGIE SA [100.0%]	50.8023	4.299	exact	Drogenbos			Flemish Brabant	https://www.gem.wiki/Drogenbos_power_station	L100000400024	G100000400024	FR0010208488	1	572		31	2033	2073	2113	460	460	460	460	460	460	460	460	460	460	460	460
oil/gas	Belgium	Europe	Western Europe	Drogenbos power station	ST			112	mothballed	1999		ST	HFO					Electrabel NV/SA [100%]	ENGIE SA [100.0%]	50.8023	4.299	exact	Drogenbos			Flemish Brabant	https://www.gem.wiki/Drogenbos_power_station	L100000400024	G100001000100	FR0010208488	1	572	572	25	2039	2079	2119	0	0	0	0	0	0	0	0	0	0	0	0
oil/gas	Australia	Oceania	Australia and New Zealand	Dry Creek GT power station	1			52	operating	1973	2030	GT	NG					Synergen Power Pty Ltd [100.0%]	ENGIE SA [72.0%]; Mitsui & Co Ltd [28.0%]	-34.8475	138.577	exact	Adelaide			South Australia	https://www.gem.wiki/Dry_Creek_GT_power_station	L100000405112	G100000401509	FR0010208488	0.72	156		51	2013	2053	2093	37.44	37.44	37.44	37.44	37.44	37.44	37.44	37.44	37.44	37.44	37.44	37.44
oil/gas	Australia	Oceania	Australia and New Zealand	Dry Creek GT power station	2			52	operating	1973	2030	GT	NG					Synergen Power Pty Ltd [100.0%]	ENGIE SA [72.0%]; Mitsui & Co Ltd [28.0%]	-34.8475	138.577	exact	Adelaide			South Australia	https://www.gem.wiki/Dry_Creek_GT_power_station	L100000405112	G100000401510	FR0010208488	0.72	156		51	2013	2053	2093	37.44	37.44	37.44	37.44	37.44	37.44	37.44	37.44	37.44	37.44	37.44	37.44
oil/gas	Australia	Oceania	Australia and New Zealand	Dry Creek GT power station	3			52	operating	1973	2030	GT	NG					Synergen Power Pty Ltd [100.0%]	ENGIE SA [72.0%]; Mitsui & Co Ltd [28.0%]	-34.8475	138.577	exact	Adelaide			South Australia	https://www.gem.wiki/Dry_Creek_GT_power_station	L100000405112	G100000401511	FR0010208488	0.72	156	156	51	2013	2053	2093	37.44	37.44	37.44	37.44	37.44	37.44	37.44	37.44	37.44	37.44	37.44	37.44
oil/gas	Netherlands	Europe	Western Europe	EEM power station	EC20	Eemscentrale		131	operating	1987		GT	NG					Engie Energie Nederland NV [100%]	ENGIE SA [100.0%]	53.4417	6.85605	exact	Eemshaven			Groningen	https://www.gem.wiki/EEM_power_station	L100000400513	G100000409939	FR0010208488	1	1931		37	2027	2067	2107	131	131	131	131	131	131	131	131	131	131	131	0
oil/gas	Netherlands	Europe	Western Europe	EEM power station	EC3	Eemscentrale		360	operating	1995		CC	NG					Engie Energie Nederland NV [100%]	ENGIE SA [100.0%]	53.4417	6.85605	exact	Eemshaven			Groningen	https://www.gem.wiki/EEM_power_station	L100000400513	G100000400513	FR0010208488	1	1931		29	2035	2075	2115	360	360	360	360	360	360	360	360	360	360	360	360
oil/gas	Netherlands	Europe	Western Europe	EEM power station	EC4	Eemscentrale		360	operating	1995		CC	NG					Engie Energie Nederland NV [100%]	ENGIE SA [100.0%]	53.4417	6.85605	exact	Eemshaven			Groningen	https://www.gem.wiki/EEM_power_station	L100000400513	G100000400514	FR0010208488	1	1931		29	2035	2075	2115	360	360	360	360	360	360	360	360	360	360	360	360
oil/gas	Netherlands	Europe	Western Europe	EEM power station	EC5	Eemscentrale		360	operating	1995		CC	NG					Engie Energie Nederland NV [100%]	ENGIE SA [100.0%]	53.4417	6.85605	exact	Eemshaven			Groningen	https://www.gem.wiki/EEM_power_station	L100000400513	G100000400515	FR0010208488	1	1931		29	2035	2075	2115	360	360	360	360	360	360	360	360	360	360	360	360
oil/gas	Netherlands	Europe	Western Europe	EEM power station	EC6	Eemscentrale		360	operating	1996		CC	NG					Engie Energie Nederland NV [100%]	ENGIE SA [100.0%]	53.4417	6.85605	exact	Eemshaven			Groningen	https://www.gem.wiki/EEM_power_station	L100000400513	G100000400516	FR0010208488	1	1931		28	2036	2076	2116	360	360	360	360	360	360	360	360	360	360	360	360
oil/gas	Netherlands	Europe	Western Europe	EEM power station	EC7	Eemscentrale		360	operating	1996		CC	NG					Engie Energie Nederland NV [100%]	ENGIE SA [100.0%]	53.4417	6.85605	exact	Eemshaven			Groningen	https://www.gem.wiki/EEM_power_station	L100000400513	G100000400517	FR0010208488	1	1931	1931	28	2036	2076	2116	360	360	360	360	360	360	360	360	360	360	360	360
oil/gas	Portugal	Europe	Southern Europe	Elecgas Pego power station	G3			418	operating	2011		CC	NG					ElecGas SA [100%]	Endesa SA [50.0%]; ENGIE SA [25.0%]; Marubeni Corp [25.0%]	39.4689	-8.1113	exact	Pego			Santarem	https://www.gem.wiki/Elecgas_Pego_power_station	L100000400584	G100000400584	FR0010208488	0.25	836		13	2051	2091	2131	104.5	104.5	104.5	104.5	104.5	104.5	104.5	104.5	104.5	104.5	104.5	104.5
oil/gas	Portugal	Europe	Southern Europe	Elecgas Pego power station	G4			418	operating	2011		CC	NG					ElecGas SA [100%]	Endesa SA [50.0%]; ENGIE SA [25.0%]; Marubeni Corp [25.0%]	39.4689	-8.1113	exact	Pego			Santarem	https://www.gem.wiki/Elecgas_Pego_power_station	L100000400584	G100000400585	FR0010208488	0.25	836	836	13	2051	2091	2131	104.5	104.5	104.5	104.5	104.5	104.5	104.5	104.5	104.5	104.5	104.5	104.5
oil/gas	Saudi Arabia	Asia	Western Asia	Fadhili cogeneration power plant	1	محطة الفاضلي لتوليد الطاقة المزدوج		1520	operating	2020		CC	NG					Fadhili Plant Cogeneration Co [100.0%]	ENGIE SA [40.0%]; Saudi Arabian Oil Co [30.0%]; Saudi Electricity Co [30.0%]	27.1123	49.0714	exact	Jubail Industrial City			Eastern	https://www.gem.wiki/Fadhili_cogeneration_power_plant	L100000405542	G100000404751	FR0010208488	0.4	1520	1520	4	2060	2100	2140	608	608	608	608	608	608	608	608	608	608	608	608
oil/gas	United Arab Emirates	Asia	Western Asia	Fujairah F2 Integrated Water and power plant	1	محطة الفجيرة F2	FAPCO (Fuj F2)/Qidfa F2 Gas Power Plant	867	operating	2011	2031	CC	NG					Fujairah Asia Power Company PJSC [100.0%]	Abu Dhabi National Energy Company PJSC [60.0%]; ENGIE SA [20.0%]; Marubeni Corp [20.0%]	25.3019	56.3704	exact	Qidfa			Fujairah	https://www.gem.wiki/Fujairah_F2_Integrated_Water_and_power_plant	L100000405577	G100000405012	FR0010208488	0.2	2166		13	2051	2091	2131	173.4	173.4	173.4	173.4	173.4	173.4	173.4	173.4	173.4	173.4	173.4	173.4
oil/gas	United Arab Emirates	Asia	Western Asia	Fujairah F2 Integrated Water and power plant	2	محطة الفجيرة F2	FAPCO (Fuj F2)/Qidfa F2 Gas Power Plant	432	operating	2011	2031	CC	NG					Fujairah Asia Power Company PJSC [100.0%]	Abu Dhabi National Energy Company PJSC [60.0%]; ENGIE SA [20.0%]; Marubeni Corp [20.0%]	25.3019	56.3704	exact	Qidfa			Fujairah	https://www.gem.wiki/Fujairah_F2_Integrated_Water_and_power_plant	L100000405577	G100000405013	FR0010208488	0.2	2166		13	2051	2091	2131	86.4	86.4	86.4	86.4	86.4	86.4	86.4	86.4	86.4	86.4	86.4	86.4
oil/gas	United Arab Emirates	Asia	Western Asia	Fujairah F2 Integrated Water and power plant	3	محطة الفجيرة F2	FAPCO (Fuj F2)/Qidfa F2 Gas Power Plant	867	operating	2011	2031	CC	NG					Fujairah Asia Power Company PJSC [100.0%]	Abu Dhabi National Energy Company PJSC [60.0%]; ENGIE SA [20.0%]; Marubeni Corp [20.0%]	25.3019	56.3704	exact	Qidfa			Fujairah	https://www.gem.wiki/Fujairah_F2_Integrated_Water_and_power_plant	L100000405577	G100000405014	FR0010208488	0.2	2166	2166	13	2051	2091	2131	173.4	173.4	173.4	173.4	173.4	173.4	173.4	173.4	173.4	173.4	173.4	173.4
oil/gas	Germany	Europe	Western Europe	Gera-Lusan power station	IC			25	operating	2018		ICCC	NG					Engie Deutschland GmbH [100.0%]	ENGIE SA [100.0%]	50.8455	12.0788	exact	Gera			Thüringen	https://www.gem.wiki/Gera-Lusan_power_station	L100000408776	G100000412890	FR0010208488	1	25	25	6	2058	2098	2138	25	25	25	25	25	25	25	25	25	25	25	25
oil/gas	Germany	Europe	Western Europe	Gera-Tinz power station	IC			20	operating	2018		ICCC	NG					Engie Deutschland GmbH [100.0%]	ENGIE SA [100.0%]	50.8942	12.0745	exact	Gera			Thüringen	https://www.gem.wiki/Gera-Tinz_power_station	L100000400265	G100000400265	FR0010208488	1	20	20	6	2058	2098	2138	20	20	20	20	20	20	20	20	20	20	20	20
oil/gas	Belgium	Europe	Western Europe	Herdersbrug power station	1			465	operating	1998		CC	NG					Electrabel NV/SA [100%]	ENGIE SA [100.0%]	51.2629	3.2112	exact	Brugge			West Flanders	https://www.gem.wiki/Herdersbrug_power_station	L100000400027	G100000400027	FR0010208488	1	465	465	26	2038	2078	2118	465	465	465	465	465	465	465	465	465	465	465	465
oil/gas	Peru	Americas	Latin America and the Caribbean	Ilo power station	Ilo31-TG1	Central Termoeléctrica de Ilo	Ilo 21	190	operating	2013		GT	D					ENGIE Energía Perú SA [100%]	ENGIE Energía Perú SA [100.0%]	-17.776	-71.1893	exact	Ilo	Pacocha	Ilo	Moquegua	https://www.gem.wiki/Ilo_power_station	L100000103158	G100000406662	FR0010208488	1	1425		11	2053	2093	2133	190	190	190	190	190	190	190	190	190	190	190	190
oil/gas	Peru	Americas	Latin America and the Caribbean	Ilo power station	Ilo31-TG2	Central Termoeléctrica de Ilo	Ilo 21	190	operating	2013		GT	D					ENGIE Energía Perú SA [100%]	ENGIE Energía Perú SA [100.0%]	-17.776	-71.1893	exact	Ilo	Pacocha	Ilo	Moquegua	https://www.gem.wiki/Ilo_power_station	L100000103158	G100000406661	FR0010208488	1	1425		11	2053	2093	2133	190	190	190	190	190	190	190	190	190	190	190	190
oil/gas	Peru	Americas	Latin America and the Caribbean	Ilo power station	Ilo31-TG3	Central Termoeléctrica de Ilo	Ilo 21	190	operating	2013		GT	D					ENGIE Energía Perú SA [100%]	ENGIE Energía Perú SA [100.0%]	-17.776	-71.1893	exact	Ilo	Pacocha	Ilo	Moquegua	https://www.gem.wiki/Ilo_power_station	L100000103158	G100000406660	FR0010208488	1	1425		11	2053	2093	2133	190	190	190	190	190	190	190	190	190	190	190	190
oil/gas	Peru	Americas	Latin America and the Caribbean	Ilo power station	Ilo41-TG1	Central Termoeléctrica de Ilo	Ilo 21	240	operating	2016		GT	D					ENGIE Energía Perú SA [100%]	ENGIE Energía Perú SA [100.0%]	-17.776	-71.1893	exact	Ilo	Pacocha	Ilo	Moquegua	https://www.gem.wiki/Ilo_power_station	L100000103158	G100000406654	FR0010208488	1	1425		8	2056	2096	2136	240	240	240	240	240	240	240	240	240	240	240	240
oil/gas	Peru	Americas	Latin America and the Caribbean	Ilo power station	Ilo41-TG2	Central Termoeléctrica de Ilo	Ilo 21	240	operating	2016		GT	D					ENGIE Energía Perú SA [100%]	ENGIE Energía Perú SA [100.0%]	-17.776	-71.1893	exact	Ilo	Pacocha	Ilo	Moquegua	https://www.gem.wiki/Ilo_power_station	L100000103158	G100000406653	FR0010208488	1	1425		8	2056	2096	2136	240	240	240	240	240	240	240	240	240	240	240	240
oil/gas	Peru	Americas	Latin America and the Caribbean	Ilo power station	Ilo41-TG3	Central Termoeléctrica de Ilo	Ilo 21	240	operating	2016		GT	D					ENGIE Energía Perú SA [100%]	ENGIE Energía Perú SA [100.0%]	-17.776	-71.1893	exact	Ilo	Pacocha	Ilo	Moquegua	https://www.gem.wiki/Ilo_power_station	L100000103158	G100000406652	FR0010208488	1	1425	1425	8	2056	2096	2136	240	240	240	240	240	240	240	240	240	240	240	240
oil/gas	Saudi Arabia	Asia	Western Asia	Juaymah cogeneration Gas power plant	GT1	محطة الجعيمة لتوليد الكهرباء	Ju'Aymah/Juymah	155	operating	2006		GT	NG					Tihama Power Generation Co Ltd [100.0%]	ENGIE SA [60.0%]; Saudi Oger Ltd [40.0%]	27.0196	49.5784	approximate	Jubail			Eastern	https://www.gem.wiki/Juaymah_cogeneration_Gas_power_plant	L100000405546	G100000404984	FR0010208488	0.6	496.7		18	2046	2086	2126	93	93	93	93	93	93	93	93	93	93	93	93
oil/gas	Saudi Arabia	Asia	Western Asia	Juaymah cogeneration Gas power plant	GT2	محطة الجعيمة لتوليد الكهرباء	Ju'Aymah/Juymah	155	operating	2006		GT	NG					Tihama Power Generation Co Ltd [100.0%]	ENGIE SA [60.0%]; Saudi Oger Ltd [40.0%]	27.0196	49.5784	approximate	Jubail			Eastern	https://www.gem.wiki/Juaymah_cogeneration_Gas_power_plant	L100000405546	G100000404985	FR0010208488	0.6	496.7		18	2046	2086	2126	93	93	93	93	93	93	93	93	93	93	93	93
oil/gas	Saudi Arabia	Asia	Western Asia	Juaymah cogeneration Gas power plant	GT3	محطة الجعيمة لتوليد الكهرباء	Ju'Aymah/Juymah	186.7	operating	2015		GT	NG					Tihama Power Generation Co Ltd [100.0%]	ENGIE SA [60.0%]; Saudi Oger Ltd [40.0%]	27.0196	49.5784	approximate	Jubail			Eastern	https://www.gem.wiki/Juaymah_cogeneration_Gas_power_plant	L100000405546	G100000404983	FR0010208488	0.6	496.7	496.7	9	2055	2095	2135	112.02	112.02	112.02	112.02	112.02	112.02	112.02	112.02	112.02	112.02	112.02	112.02
oil/gas	Italy	Europe	Southern Europe	Leini power station	1			380	operating	2007		CC	NG					Engie Italia SpA [100.0%]	ENGIE SA [100.0%]	45.163	7.7505	exact	Leini			Turin	https://www.gem.wiki/Leini_power_station	L100000400391	G100000400391	FR0010208488	1	380	380	17	2047	2087	2127	380	380	380	380	380	380	380	380	380	380	380	380
oil/gas	Belgium	Europe	Western Europe	Les Awirs power station	CC1		Centrale des Awirs	875	pre-construction	2025		CC	NG					Electrabel NV/SA [100%]	ENGIE SA [100.0%]	50.5856	5.41687	exact	Flémalle			Liege	https://www.gem.wiki/Les_Awirs_power_station	L100000406373	G100000406281	FR0010208488	1	875	875	-1	2065	2105	2145	0	0	0	0	0	875	875	875	875	875	875	875
oil/gas	Belgium	Europe	Western Europe	Lillo Degussa power station	1		Evonik Degussa	42	operating	1999		CC	NG					Electrabel NV/SA [100%]	ENGIE SA [100.0%]	51.3095	4.30402	exact	Antwerp			Antwerp	https://www.gem.wiki/Lillo_Degussa_power_station	L100000400030	G100000400030	FR0010208488	1	85		25	2039	2079	2119	42	42	42	42	42	42	42	42	42	42	42	42
oil/gas	Belgium	Europe	Western Europe	Lillo Degussa power station	2		Evonik Degussa	43	operating	2011		CC	NG					Electrabel NV/SA [100%]	ENGIE SA [100.0%]	51.3095	4.30402	exact	Antwerp			Antwerp	https://www.gem.wiki/Lillo_Degussa_power_station	L100000400030	G100000410396	FR0010208488	1	85	85	13	2051	2091	2131	43	43	43	43	43	43	43	43	43	43	43	43
oil/gas	Netherlands	Europe	Western Europe	Maxima power station	4			440	operating	2010		CC	NG					ENGIE SA [100%]	ENGIE SA [100.0%]	52.5772	5.53	exact	Lelystad			Flevoland	https://www.gem.wiki/Maxima_power_station	L100000400544	G100000400544	FR0010208488	1	880		14	2050	2090	2130	440	440	440	440	440	440	440	440	440	440	440	440
oil/gas	Netherlands	Europe	Western Europe	Maxima power station	5			440	operating	2010		CC	NG					ENGIE SA [100%]	ENGIE SA [100.0%]	52.5772	5.53	exact	Lelystad			Flevoland	https://www.gem.wiki/Maxima_power_station	L100000400544	G100000400545	FR0010208488	1	880	880	14	2050	2090	2130	440	440	440	440	440	440	440	440	440	440	440	440
oil/gas	Chile	Americas	Latin America and the Caribbean	Mejillones power station	3	Termoeléctrica Mejillones	Red Dragon (Unit 4/Unit 5)/IEM2 (Unit 5)/IEM1 (Unit 4)/Infraestructura Energética de Mejillones	245	operating	2000		CC	NG					ENGIE Energía Chile SA [100%]	ENGIE Energía Chile SA [100.0%]	-23.0892	-70.4103	exact	Mejillones			Antofagasta	https://www.gem.wiki/Mejillones_power_station	L100000100184	G100000406727	FR0010208488	1	1329		24	2040	2080	2120	245	245	245	245	245	245	245	245	245	245	245	245
oil/gas	Chile	Americas	Latin America and the Caribbean	Mejillones power station	Unit 4	Termoeléctrica Mejillones	IEM2 (Unit 5)/Infraestructura Energética de Mejillones/Red Dragon (Unit 4/Unit 5)/IEM1 (Unit 4)	375	announced	2025		ST	NG/D					ENGIE Energía Chile SA [100%]	ENGIE Energía Chile SA [100.0%]	-23.0892	-70.4103	exact	Mejillones			Antofagasta	https://www.gem.wiki/Mejillones_power_station	L100000100184	G100000106833	FR0010208488	1	1329	1329	-1	2065	2105	2145	0	0	0	0	0	375	375	375	375	375	375	375
oil/gas	Australia	Oceania	Australia and New Zealand	Mintaro GT power station	1			90	operating	1990	2030	GT	NG					Synergen Power Pty Ltd [100.0%]	ENGIE SA [72.0%]; Mitsui & Co Ltd [28.0%]	-33.9032	138.738	exact	Stanley			South Australia	https://www.gem.wiki/Mintaro_GT_power_station	L100000405122	G100000401527	FR0010208488	0.72	90	90	34	2030	2070	2110	64.8	64.8	64.8	64.8	64.8	64.8	64.8	64.8	64.8	64.8	64.8	0
oil/gas	United Arab Emirates	Asia	Western Asia	Mirfa Independent Water and Power Project	1	محطة المرفأ للمنتج المستقل٫ محطة المرفأ الجديدة/محطة ميبكو	MIPCO/New Mifrah/New Al Mirfa Power Plant	90	operating	2017	2042	GT	NG					Mirfa International Power and Water Company PJSC [100.0%]	Abu Dhabi Water and Electricity Authority [60.0%]; ENGIE SA [20.0%]; Sojitz Corp [20.0%]	24.121	53.447	exact	Al Mirfa			Abu Dhabi	https://www.gem.wiki/Mirfa_Independent_Water_and_Power_Project	L100000405588	G100000405039	FR0010208488	0.2	1697		7	2057	2097	2137	18	18	18	18	18	18	18	18	18	18	18	18
oil/gas	United Arab Emirates	Asia	Western Asia	Mirfa Independent Water and Power Project	2	محطة المرفأ للمنتج المستقل٫ محطة المرفأ الجديدة/محطة ميبكو	MIPCO/New Mifrah/New Al Mirfa Power Plant	90	operating	2017	2042	GT	NG					Mirfa International Power and Water Company PJSC [100.0%]	Abu Dhabi Water and Electricity Authority [60.0%]; ENGIE SA [20.0%]; Sojitz Corp [20.0%]	24.121	53.447	exact	Al Mirfa			Abu Dhabi	https://www.gem.wiki/Mirfa_Independent_Water_and_Power_Project	L100000405588	G100000405040	FR0010208488	0.2	1697		7	2057	2097	2137	18	18	18	18	18	18	18	18	18	18	18	18
oil/gas	United Arab Emirates	Asia	Western Asia	Mirfa Independent Water and Power Project	3	محطة المرفأ للمنتج المستقل٫ محطة المرفأ الجديدة/محطة ميبكو	MIPCO/New Mifrah/New Al Mirfa Power Plant	90	operating	2017	2042	GT	NG					Mirfa International Power and Water Company PJSC [100.0%]	Abu Dhabi Water and Electricity Authority [60.0%]; ENGIE SA [20.0%]; Sojitz Corp [20.0%]	24.121	53.447	exact	Al Mirfa			Abu Dhabi	https://www.gem.wiki/Mirfa_Independent_Water_and_Power_Project	L100000405588	G100000405041	FR0010208488	0.2	1697		7	2057	2097	2137	18	18	18	18	18	18	18	18	18	18	18	18
oil/gas	United Arab Emirates	Asia	Western Asia	Mirfa Independent Water and Power Project	4	محطة المرفأ للمنتج المستقل٫ محطة المرفأ الجديدة/محطة ميبكو	MIPCO/New Mifrah/New Al Mirfa Power Plant	90	operating	2017	2042	GT	NG					Mirfa International Power and Water Company PJSC [100.0%]	Abu Dhabi Water and Electricity Authority [60.0%]; ENGIE SA [20.0%]; Sojitz Corp [20.0%]	24.121	53.447	exact	Al Mirfa			Abu Dhabi	https://www.gem.wiki/Mirfa_Independent_Water_and_Power_Project	L100000405588	G100000405042	FR0010208488	0.2	1697		7	2057	2097	2137	18	18	18	18	18	18	18	18	18	18	18	18
oil/gas	United Arab Emirates	Asia	Western Asia	Mirfa Independent Water and Power Project	CC	محطة المرفأ للمنتج المستقل٫ محطة المرفأ الجديدة/محطة ميبكو	MIPCO/New Mifrah/New Al Mirfa Power Plant	1337	operating	2017	2042	CC	NG					Mirfa International Power and Water Company PJSC [100.0%]	Abu Dhabi Water and Electricity Authority [60.0%]; ENGIE SA [20.0%]; Sojitz Corp [20.0%]	24.121	53.447	exact	Al Mirfa			Abu Dhabi	https://www.gem.wiki/Mirfa_Independent_Water_and_Power_Project	L100000405588	G100000405038	FR0010208488	0.2	1697	1697	7	2057	2097	2137	267.4	267.4	267.4	267.4	267.4	267.4	267.4	267.4	267.4	267.4	267.4	267.4
oil/gas	Belgium	Europe	Western Europe	Monsanto Oud-Lillo power station	1		Gasturbine Oud-Lillo/Oud-Lillo Monsanto	43	operating			not found	NG					Electrabel NV/SA [100%]	ENGIE SA [100.0%]	51.3155	4.28961	approximate	Antwerp			Antwerp	https://www.gem.wiki/Monsanto_Oud-Lillo_power_station	L100000406368	G100000406274	FR0010208488	1	43	43	-99	40	80	120	43	43	43	43	43	43	43	43	43	43	43	43
oil/gas	France	Europe	Western Europe	Montoir-De-Bretagne power station	1		SPEM/La Centrale Thermique de Grandes-Rivieres	435	operating	2010		CC	NG					Engie Energy France [100.0%]	ENGIE SA [100.0%]	47.3072	-2.13716	exact	Montoir-de-Bretagne			Loire-Atlantique	https://www.gem.wiki/Montoir-De-Bretagne_power_station	L100000400104	G100000400104	FR0010208488	1	435	435	14	2050	2090	2130	435	435	435	435	435	435	435	435	435	435	435	435
oil/gas	Italy	Europe	Southern Europe	Napoli Levante power station	1			400	operating	2009		CC	NG					Tirreno Power SpA [100.0%]	ENGIE SA [50.0%]; Energia Italiana SpA [50.0%]	40.8339	14.3006	exact	Napoli			Campania	https://www.gem.wiki/Napoli_Levante_power_station	L100000400407	G100000400407	FR0010208488	0.5	400	400	15	2049	2089	2129	200	200	200	200	200	200	200	200	200	200	200	200
oil/gas	United States	Americas	Northern America	Nassau Energy power station	CC1			55	retired	1991	2022	CC	NG/FO					Engie North America [100.0%]	ENGIE SA [100.0%]	40.7264	-73.5892	exact	Garden City	Nassau		New York	https://www.gem.wiki/Nassau_Energy_power_station	L100000401658	G100000401732	FR0010208488	1	55	55	33	2031	2071	2111	55	55	55	55	55	55	55	55	55	55	55	55
oil/gas	Italy	Europe	Southern Europe	Nera Montoro power station	1			50	operating	1994		CC	NG					Engie Servizi SpA [100.0%]	ENGIE SA [100.0%]	42.4943	12.4724	exact	Nera Montoro			Terni	https://www.gem.wiki/Nera_Montoro_power_station	L100000400408	G100000400408	FR0010208488	1	50	50	30	2034	2074	2114	50	50	50	50	50	50	50	50	50	50	50	50
oil/gas	United States	Americas	Northern America	Oyster Creek Unit VIII power station	CC1			498	operating	1994		CC	NG/OG					Engie North America [50.0%]; Toyota Tsusho Corp [37.5%]; GE Energy Financial Services [12.5%]	ENGIE SA [50.0%]; General Electric Co [12.5%]	28.9802	-95.342	exact	Freeport	Brazoria		Texas	https://www.gem.wiki/Oyster_Creek_Unit_VIII_power_station	L100000401670	G100000401762	FR0010208488	0.5	498	498	30	2034	2074	2114	249	249	249	249	249	249	249	249	249	249	249	249
oil/gas	Saudi Arabia	Asia	Western Asia	Ras Tanura Tihama power station	1	محطة توليد رأس تنورة		75	operating	2006		GT	NG					Tihama Power Generation Co Ltd [100.0%]	ENGIE SA [60.0%]; Saudi Oger Ltd [40.0%]	26.8003	50.0039	exact	Ras Tanura			Ash Sharqiyah	https://www.gem.wiki/Ras_Tanura_Tihama_power_station	L100000407703	G100000410109	FR0010208488	0.6	150		18	2046	2086	2126	45	45	45	45	45	45	45	45	45	45	45	45
oil/gas	Saudi Arabia	Asia	Western Asia	Ras Tanura Tihama power station	2	محطة توليد رأس تنورة		75	operating	2006		GT	NG					Tihama Power Generation Co Ltd [100.0%]	ENGIE SA [60.0%]; Saudi Oger Ltd [40.0%]	26.8003	50.0039	exact	Ras Tanura			Ash Sharqiyah	https://www.gem.wiki/Ras_Tanura_Tihama_power_station	L100000407703	G100000410108	FR0010208488	0.6	150	150	18	2046	2086	2126	45	45	45	45	45	45	45	45	45	45	45	45
oil/gas	Saudi Arabia	Asia	Western Asia	Riyadh PP11 power station	2	محطة الكهرباء الخامسة		824	operating	1979		CC	NG/LFO					Dhuruma O&M Co Ltd [100.0%]	ENGIE SA [80.0%]; Aljomaih Energy & Water Co Ltd [20.0%]	24.7734	46.6563	exact	Dhurma - Riyadh			Ar Riyad	https://www.gem.wiki/Riyadh_PP11_power_station	L100000407708	G100000410127	FR0010208488	0.8	1805		45	2019	2059	2099	659.2	659.2	659.2	659.2	659.2	659.2	659.2	659.2	659.2	659.2	659.2	659.2
oil/gas	Saudi Arabia	Asia	Western Asia	Riyadh PP11 power station	1	محطة الكهرباء الخامسة		981	operating	2013		CC	NG/LFO					Dhuruma O&M Co Ltd [100.0%]	ENGIE SA [80.0%]; Aljomaih Energy & Water Co Ltd [20.0%]	24.7734	46.6563	exact	Dhurma - Riyadh			Ar Riyad	https://www.gem.wiki/Riyadh_PP11_power_station	L100000407708	G100000410128	FR0010208488	0.8	1805	1805	11	2053	2093	2133	784.8	784.8	784.8	784.8	784.8	784.8	784.8	784.8	784.8	784.8	784.8	784.8
oil/gas	Germany	Europe	Western Europe	Romerbrucke power station	2b	HKW Römerbrücke/Kraftwerk Römerbrücke	Saarland power plant	53	operating	1965		ST	NG					Energie SaarLorLux AG [100.0%]	ENGIE SA [51.0%]; Stadtwerke Saarbrücken GmbH [49.0%]	49.2239	7.0149	exact	Saarbrücken			Saarland	https://www.gem.wiki/Romerbrucke_power_station	L100000101975	G100000409751	FR0010208488	0.51	177		59	2005	2045	2085	27.03	27.03	27.03	27.03	27.03	27.03	27.03	27.03	27.03	27.03	27.03	27.03
oil/gas	Germany	Europe	Western Europe	Romerbrucke power station	1	HKW Römerbrücke/Kraftwerk Römerbrücke	Saarland power plant	74	operating	2005		CC	NG					Energie SaarLorLux AG [100.0%]	ENGIE SA [51.0%]; Stadtwerke Saarbrücken GmbH [49.0%]	49.2239	7.0149	exact	Saarbrücken			Saarland	https://www.gem.wiki/Romerbrucke_power_station	L100000101975	G100000400242	FR0010208488	0.51	177		19	2045	2085	2125	37.74	37.74	37.74	37.74	37.74	37.74	37.74	37.74	37.74	37.74	37.74	37.74
oil/gas	Germany	Europe	Western Europe	Romerbrucke power station	IC	HKW Römerbrücke/Kraftwerk Römerbrücke	Saarland power plant	50	operating	2022		ICCC	NG					Energie SaarLorLux AG [100.0%]	ENGIE SA [51.0%]; Stadtwerke Saarbrücken GmbH [49.0%]	49.2239	7.0149	exact	Saarbrücken			Saarland	https://www.gem.wiki/Romerbrucke_power_station	L100000101975	G100000412845	FR0010208488	0.51	177	177	2	2062	2102	2142	0	0	25.5	25.5	25.5	25.5	25.5	25.5	25.5	25.5	25.5	25.5
oil/gas	Belgium	Europe	Western Europe	Saint-Ghislain power station	1			350	operating	2001		CC	NG					Electrabel NV/SA [100%]	ENGIE SA [100.0%]	50.4719	3.8248	exact	Baudour			Hainaut	https://www.gem.wiki/Saint-Ghislain_power_station	L100000400033	G100000400033	FR0010208488	1	350	350	23	2041	2081	2121	350	350	350	350	350	350	350	350	350	350	350	350
oil/gas	France	Europe	Western Europe	Saint-Ouen-sur-Seine power station	1	CENTRALE THERMIQUE DE BATELIERS		128	operating	2001		GT	NG					Paris Urban Heating Company SA [100.0%]	ENGIE SA [66.0%]; City of Paris [33.0%]	48.9117	2.32764	exact	Saint-Ouen-sur-Seine			Ile-de-France	https://www.gem.wiki/Saint-Ouen-sur-Seine_power_station	L100000407655	G100000409982	FR0010208488	0.66	128	128	23	2041	2081	2121	84.48	84.48	84.48	84.48	84.48	84.48	84.48	84.48	84.48	84.48	84.48	84.48
oil/gas	Belgium	Europe	Western Europe	Sappi Lanaken power station	1			43	operating			not found	NG					Electrabel NV/SA [100%]	ENGIE SA [100.0%]	50.8827	5.64195	exact	Lanaken			Limburg Province	https://www.gem.wiki/Sappi_Lanaken_power_station	L100000406370	G100000406276	FR0010208488	1	43	43	-99	40	80	120	43	43	43	43	43	43	43	43	43	43	43	43
oil/gas	Belgium	Europe	Western Europe	Scheldelaan Exxonmobil power station	1			140	operating	2009		not found	NG					Electrabel NV/SA [100%]	ENGIE SA [100.0%]	51.254	4.334	exact	Antwerp			Antwerp	https://www.gem.wiki/Scheldelaan_Exxonmobil_power_station	L100000400034	G100000400034	FR0010208488	1	140	140	15	2049	2089	2129	140	140	140	140	140	140	140	140	140	140	140	140
oil/gas	Singapore	Asia	South-eastern Asia	Senoko power station	1			425	operating	1996		CC	NG					Senoko Energy Pte Ltd [100.0%]	ENGIE SA [30.0%]; Marubeni Corp [30.0%]; Kansai Electric Power Co [15.0%]; Kyushu Electric Power Co Inc [15.0%]; Japan Bank for International Cooperation [10.0%]	1.4655	103.8	exact	Sembawang			North Region	https://www.gem.wiki/Senoko_power_station	L100000405353	G100000404571	FR0010208488	0.3	3292		28	2036	2076	2116	127.5	127.5	127.5	127.5	127.5	127.5	127.5	127.5	127.5	127.5	127.5	127.5
oil/gas	Singapore	Asia	South-eastern Asia	Senoko power station	2			425	operating	1996		CC	NG					Senoko Energy Pte Ltd [100.0%]	ENGIE SA [30.0%]; Marubeni Corp [30.0%]; Kansai Electric Power Co [15.0%]; Kyushu Electric Power Co Inc [15.0%]; Japan Bank for International Cooperation [10.0%]	1.4655	103.8	exact	Sembawang			North Region	https://www.gem.wiki/Senoko_power_station	L100000405353	G100000404572	FR0010208488	0.3	3292		28	2036	2076	2116	127.5	127.5	127.5	127.5	127.5	127.5	127.5	127.5	127.5	127.5	127.5	127.5
oil/gas	Singapore	Asia	South-eastern Asia	Senoko power station	3			360	operating	2002		CC	NG					Senoko Energy Pte Ltd [100.0%]	ENGIE SA [30.0%]; Marubeni Corp [30.0%]; Kansai Electric Power Co [15.0%]; Kyushu Electric Power Co Inc [15.0%]; Japan Bank for International Cooperation [10.0%]	1.4655	103.8	exact	Sembawang			North Region	https://www.gem.wiki/Senoko_power_station	L100000405353	G100000404573	FR0010208488	0.3	3292		22	2042	2082	2122	108	108	108	108	108	108	108	108	108	108	108	108
oil/gas	Singapore	Asia	South-eastern Asia	Senoko power station	4			360	operating	2004		CC	NG					Senoko Energy Pte Ltd [100.0%]	ENGIE SA [30.0%]; Marubeni Corp [30.0%]; Kansai Electric Power Co [15.0%]; Kyushu Electric Power Co Inc [15.0%]; Japan Bank for International Cooperation [10.0%]	1.4655	103.8	exact	Sembawang			North Region	https://www.gem.wiki/Senoko_power_station	L100000405353	G100000404574	FR0010208488	0.3	3292		20	2044	2084	2124	108	108	108	108	108	108	108	108	108	108	108	108
oil/gas	Singapore	Asia	South-eastern Asia	Senoko power station	5			360	operating	2004		CC	NG					Senoko Energy Pte Ltd [100.0%]	ENGIE SA [30.0%]; Marubeni Corp [30.0%]; Kansai Electric Power Co [15.0%]; Kyushu Electric Power Co Inc [15.0%]; Japan Bank for International Cooperation [10.0%]	1.4655	103.8	exact	Sembawang			North Region	https://www.gem.wiki/Senoko_power_station	L100000405353	G100000404575	FR0010208488	0.3	3292		20	2044	2084	2124	108	108	108	108	108	108	108	108	108	108	108	108
oil/gas	Singapore	Asia	South-eastern Asia	Senoko power station	6			431	operating	2013		CC	NG					Senoko Energy Pte Ltd [100.0%]	ENGIE SA [30.0%]; Marubeni Corp [30.0%]; Kansai Electric Power Co [15.0%]; Kyushu Electric Power Co Inc [15.0%]; Japan Bank for International Cooperation [10.0%]	1.4655	103.8	exact	Sembawang			North Region	https://www.gem.wiki/Senoko_power_station	L100000405353	G100000404576	FR0010208488	0.3	3292		11	2053	2093	2133	129.3	129.3	129.3	129.3	129.3	129.3	129.3	129.3	129.3	129.3	129.3	129.3
oil/gas	Singapore	Asia	South-eastern Asia	Senoko power station	7			431	operating	2013		CC	NG					Senoko Energy Pte Ltd [100.0%]	ENGIE SA [30.0%]; Marubeni Corp [30.0%]; Kansai Electric Power Co [15.0%]; Kyushu Electric Power Co Inc [15.0%]; Japan Bank for International Cooperation [10.0%]	1.4655	103.8	exact	Sembawang			North Region	https://www.gem.wiki/Senoko_power_station	L100000405353	G100000404577	FR0010208488	0.3	3292		11	2053	2093	2133	129.3	129.3	129.3	129.3	129.3	129.3	129.3	129.3	129.3	129.3	129.3	129.3
oil/gas	Singapore	Asia	South-eastern Asia	Senoko power station	ST1			250	operating			ST	NG/FO					Senoko Energy Pte Ltd [100.0%]	ENGIE SA [30.0%]; Marubeni Corp [30.0%]; Kansai Electric Power Co [15.0%]; Kyushu Electric Power Co Inc [15.0%]; Japan Bank for International Cooperation [10.0%]	1.4655	103.8	exact	Sembawang			North Region	https://www.gem.wiki/Senoko_power_station	L100000405353	G100000413180	FR0010208488	0.3	3292		-99	40	80	120	75	75	75	75	75	75	75	75	75	75	75	75
oil/gas	Singapore	Asia	South-eastern Asia	Senoko power station	ST2			250	operating			ST	NG/FO					Senoko Energy Pte Ltd [100.0%]	ENGIE SA [30.0%]; Marubeni Corp [30.0%]; Kansai Electric Power Co [15.0%]; Kyushu Electric Power Co Inc [15.0%]; Japan Bank for International Cooperation [10.0%]	1.4655	103.8	exact	Sembawang			North Region	https://www.gem.wiki/Senoko_power_station	L100000405353	G100000413179	FR0010208488	0.3	3292	3292	-99	40	80	120	75	75	75	75	75	75	75	75	75	75	75	75
oil/gas	Italy	Europe	Southern Europe	Settimo Torinese power station	1			60	operating	1995		CC	NG					Engie Servizi SpA [100.0%]	ENGIE SA [100.0%]	45.1261	7.73778	exact	Settimo Torinese			Turin	https://www.gem.wiki/Settimo_Torinese_power_station	L100000400450	G100000400450	FR0010208488	1	60	60	29	2035	2075	2115	60	60	60	60	60	60	60	60	60	60	60	60
oil/gas	Saudi Arabia	Asia	Western Asia	Shedgum cogeneration Gas power plant	GT1		Shedgum Aramco	155	operating	2006		GT	NG					Tihama Power Generation Co Ltd [100.0%]	ENGIE SA [60.0%]; Saudi Oger Ltd [40.0%]	25.6516	49.3855	exact	Al Ahsa			Eastern	https://www.gem.wiki/Shedgum_cogeneration_Gas_power_plant	L100000405564	G100000404986	FR0010208488	0.6	496.7		18	2046	2086	2126	93	93	93	93	93	93	93	93	93	93	93	93
oil/gas	Saudi Arabia	Asia	Western Asia	Shedgum cogeneration Gas power plant	GT2		Shedgum Aramco	155	operating	2006		GT	NG					Tihama Power Generation Co Ltd [100.0%]	ENGIE SA [60.0%]; Saudi Oger Ltd [40.0%]	25.6516	49.3855	exact	Al Ahsa			Eastern	https://www.gem.wiki/Shedgum_cogeneration_Gas_power_plant	L100000405564	G100000404987	FR0010208488	0.6	496.7		18	2046	2086	2126	93	93	93	93	93	93	93	93	93	93	93	93
oil/gas	Saudi Arabia	Asia	Western Asia	Shedgum cogeneration Gas power plant	GT3		Shedgum Aramco	186.7	operating	2015		GT	NG					Tihama Power Generation Co Ltd [100.0%]	ENGIE SA [60.0%]; Saudi Oger Ltd [40.0%]	25.6516	49.3855	exact	Al Ahsa			Eastern	https://www.gem.wiki/Shedgum_cogeneration_Gas_power_plant	L100000405564	G100000404988	FR0010208488	0.6	496.7	496.7	9	2055	2095	2135	112.02	112.02	112.02	112.02	112.02	112.02	112.02	112.02	112.02	112.02	112.02	112.02
oil/gas	United Arab Emirates	Asia	Western Asia	Shuweihat S1 power plant	1	مجمع الشويهات للطاقة والمياه/محطة الشويهات S1 المستقلة للمياه والطاقة		1615	operating	2004	2025	CC	NG					Shuweihat CMS International Power Company PJSC [100.0%]	Abu Dhabi National Energy Company PJSC [60.0%]; ENGIE SA [20.0%]; Sumitomo Corp [20.0%]	24.1651	52.5697	exact	Jebel Dhanna			Abu Dhabi	https://www.gem.wiki/Shuweihat_S1_power_plant	L100000405592	G100000405048	FR0010208488	0.2	1615	1615	20	2044	2084	2124	323	323	323	323	323	323	323	323	323	323	323	323
oil/gas	United Arab Emirates	Asia	Western Asia	Shuweihat S2 power plant	1	مجمع الشويهات للطاقة والمياه/محطة الشويهات S2 المستقلة للمياه والطاقة		820.5	operating	2011	2036	CC	NG/FO					Ruwais Power Company PJSC [100.0%]	Abu Dhabi National Energy Company PJSC [54.0%]; ENGIE SA [20.0%]; Marubeni Corp [10.0%]; Osaka Gas Co Ltd [10.0%]; Abu Dhabi Water and Electricity Authority [6.0%]	24.1569	52.5692	exact	Jebel Dhanna			Abu Dhabi	https://www.gem.wiki/Shuweihat_S2_power_plant	L100000405593	G100000405049	FR0010208488	0.2	1641		13	2051	2091	2131	164.1	164.1	164.1	164.1	164.1	164.1	164.1	164.1	164.1	164.1	164.1	164.1
oil/gas	United Arab Emirates	Asia	Western Asia	Shuweihat S2 power plant	2	مجمع الشويهات للطاقة والمياه/محطة الشويهات S2 المستقلة للمياه والطاقة		820.5	operating	2012	2036	CC	NG/FO					Ruwais Power Company PJSC [100.0%]	Abu Dhabi National Energy Company PJSC [54.0%]; ENGIE SA [20.0%]; Marubeni Corp [10.0%]; Osaka Gas Co Ltd [10.0%]; Abu Dhabi Water and Electricity Authority [6.0%]	24.1569	52.5692	exact	Jebel Dhanna			Abu Dhabi	https://www.gem.wiki/Shuweihat_S2_power_plant	L100000405593	G100000405050	FR0010208488	0.2	1641	1641	12	2052	2092	2132	164.1	164.1	164.1	164.1	164.1	164.1	164.1	164.1	164.1	164.1	164.1	164.1
oil/gas	Portugal	Europe	Southern Europe	Tapada do Outeiro power station	G1			330	operating	1998		CC	NG					TrustEnergy BV [100%]	ENGIE SA [50.0%]; Marubeni Corp [50.0%]	41.07	-8.4587	exact	Medas			Porto	https://www.gem.wiki/Tapada_do_Outeiro_power_station	L100000400593	G100000400593	FR0010208488	0.5	990		26	2038	2078	2118	165	165	165	165	165	165	165	165	165	165	165	165
oil/gas	Portugal	Europe	Southern Europe	Tapada do Outeiro power station	G2			330	operating	1998		CC	NG					TrustEnergy BV [100%]	ENGIE SA [50.0%]; Marubeni Corp [50.0%]	41.07	-8.4587	exact	Medas			Porto	https://www.gem.wiki/Tapada_do_Outeiro_power_station	L100000400593	G100000400594	FR0010208488	0.5	990		26	2038	2078	2118	165	165	165	165	165	165	165	165	165	165	165	165
oil/gas	Portugal	Europe	Southern Europe	Tapada do Outeiro power station	G3			330	operating	1999		CC	NG					TrustEnergy BV [100%]	ENGIE SA [50.0%]; Marubeni Corp [50.0%]	41.07	-8.4587	exact	Medas			Porto	https://www.gem.wiki/Tapada_do_Outeiro_power_station	L100000400593	G100000400595	FR0010208488	0.5	990	990	25	2039	2079	2119	165	165	165	165	165	165	165	165	165	165	165	165
oil/gas	United Arab Emirates	Asia	Western Asia	Taweelah A1 power plant	1	محطة الطويلة A1	Taweelah A1 Integrated Water and Power Plant	1672.5	operating	2009	2029	CC	NG					Total Tractebel Emirates O&M Co SA [100.0%]	ENGIE SA [50.0%]; TotalEnergies SE [50.0%]	24.7604	54.6797	exact	Al Taweelah			Abu Dhabi	https://www.gem.wiki/Taweelah_A1_power_plant	L100000405595	G100000405053	FR0010208488	0.5	1672.5	1672.5	15	2049	2089	2129	836.25	836.25	836.25	836.25	836.25	836.25	836.25	836.25	836.25	836.25	836.25	836.25
oil/gas	United Arab Emirates	Asia	Western Asia	Taweelah A2 power plant	2	محطة الطويلة A2	Taweelah A2 Integrated Water and Power Plant	710	retired	2001	2022	CC	NG					Total Tractebel Emirates O&M Co SA [100.0%]	ENGIE SA [50.0%]; TotalEnergies SE [50.0%]	24.761	54.6826	exact	Al Taweelah			Abu Dhabi	https://www.gem.wiki/Taweelah_A2_power_plant	L100000405596	G100000405054	FR0010208488	0.5	710	710	23	2041	2081	2121	355	355	0	0	0	0	0	0	0	0	0	0
oil/gas	Chile	Americas	Latin America and the Caribbean	Tocopilla power station	16	Termoeléctrica Tocopilla		394	operating	2001		CC	NG					ENGIE Energía Chile SA [100%]	ENGIE Energía Chile SA [100.0%]	-22.0964	-70.2118	exact	Tocopilla		Tocopilla	Antofagasta Region	https://www.gem.wiki/Tocopilla_power_station	L100000100186	G100000406715	FR0010208488	1	662	662	23	2041	2081	2121	394	394	394	394	394	394	394	394	394	394	394	394
oil/gas	Italy	Europe	Southern Europe	Torrevaldaliga Sud power station	TV5			760	operating	2004		CC	NG					Tirreno Power SpA [100.0%]	ENGIE SA [50.0%]; Energia Italiana SpA [50.0%]	42.1241	11.7624	exact	Civitavecchia			Rome	https://www.gem.wiki/Torrevaldaliga_Sud_power_station	L100000400469	G100000400469	FR0010208488	0.5	1460		20	2044	2084	2124	380	380	380	380	380	380	380	380	380	380	380	380
oil/gas	Italy	Europe	Southern Europe	Torrevaldaliga Sud power station	TV6			380	operating	2005		CC	NG					Tirreno Power SpA [100.0%]	ENGIE SA [50.0%]; Energia Italiana SpA [50.0%]	42.1241	11.7624	exact	Civitavecchia			Rome	https://www.gem.wiki/Torrevaldaliga_Sud_power_station	L100000400469	G100000400470	FR0010208488	0.5	1460		19	2045	2085	2125	190	190	190	190	190	190	190	190	190	190	190	190
oil/gas	Italy	Europe	Southern Europe	Torrevaldaliga Sud power station	TV4			320	mothballed			GT	NG					Tirreno Power SpA [100.0%]	ENGIE SA [50.0%]; Energia Italiana SpA [50.0%]	42.1241	11.7624	exact	Civitavecchia			Rome	https://www.gem.wiki/Torrevaldaliga_Sud_power_station	L100000400469	G100000409808	FR0010208488	0.5	1460	1460	-99	40	80	120	0	0	0	0	0	0	0	0	0	0	0	0
oil/gas	Mexico	Americas	Latin America and the Caribbean	Tractebel Monterrey power station	1	Central CC Tractebel Monterrey		284	operating	2003		CC	NG					Tractebel Energía De Monterrey S de RL de CV [100%]	ENGIE SA [100.0%]	25.7664	-100.542	exact	García			Nuevo León	https://gem.wiki/Tractebel_Monterrey_power_station	L100000406255	G100000406442	FR0010208488	1	284	284	21	2043	2083	2123	284	284	284	284	284	284	284	284	284	284	284	284
oil/gas	Pakistan	Asia	Southern Asia	Uch power station	1			586	operating	2000		CC	NG/D					UCH Power Ltd [100.0%]	ENGIE SA; Swicorp Co	28.5827	68.1762	exact	Dera Murad Jamali		Nasirabad District	Balochistan	https://www.gem.wiki/Uch_power_station	L100000406037	G100000406123	FR0010208488	0.5	990		24	2040	2080	2120	293	293	293	293	293	293	293	293	293	293	293	293
oil/gas	Pakistan	Asia	Southern Asia	Uch power station	2			404	operating	2014		CC	NG/D					UCH-II Power Pvt Ltd [100.0%]	ENGIE SA; Swicorp Co	28.5827	68.1762	exact	Dera Murad Jamali		Nasirabad District	Balochistan	https://www.gem.wiki/Uch_power_station	L100000406037	G100000406124	FR0010208488	0.5	990	990	10	2054	2094	2134	202	202	202	202	202	202	202	202	202	202	202	202
oil/gas	United Arab Emirates	Asia	Western Asia	Umm Al Nar West and East Integrated Water and power plant	GT01	محطة أم النار الغربية للطاقة	Umm Al Nar East plant/UAN East/Umm Al Nar West cogeneration plant	59	operating	1979		GT	NG/FO					Arabian Power Company PJSC [100.0%]	Arabian United Power Company PJSC [60.0%]; ENGIE SA [20.0%]; Chubu Electric Power Co Inc [10.0%]; Tokyo Electric Power Co [10.0%]	24.4348	54.4876	exact	Abu Dhabi			Abu Dhabi	https://www.gem.wiki/Umm_Al_Nar_West_and_East_Integrated_Water_and_power_plant	L100000405598	G100000405072	FR0010208488	0.2	3078		45	2019	2059	2099	11.8	11.8	11.8	11.8	11.8	11.8	11.8	11.8	11.8	11.8	11.8	11.8
oil/gas	United Arab Emirates	Asia	Western Asia	Umm Al Nar West and East Integrated Water and power plant	GT02	محطة أم النار الغربية للطاقة	Umm Al Nar East plant/UAN East/Umm Al Nar West cogeneration plant	59	operating	1979		GT	NG/FO					Arabian Power Company PJSC [100.0%]	Arabian United Power Company PJSC [60.0%]; ENGIE SA [20.0%]; Chubu Electric Power Co Inc [10.0%]; Tokyo Electric Power Co [10.0%]	24.4348	54.4876	exact	Abu Dhabi			Abu Dhabi	https://www.gem.wiki/Umm_Al_Nar_West_and_East_Integrated_Water_and_power_plant	L100000405598	G100000405073	FR0010208488	0.2	3078		45	2019	2059	2099	11.8	11.8	11.8	11.8	11.8	11.8	11.8	11.8	11.8	11.8	11.8	11.8
oil/gas	United Arab Emirates	Asia	Western Asia	Umm Al Nar West and East Integrated Water and power plant	ST1	محطة أم النار الغربية للطاقة	Umm Al Nar East plant/UAN East/Umm Al Nar West cogeneration plant	60	operating	1981		ST	NG/FO					Arabian Power Company PJSC [100.0%]	Arabian United Power Company PJSC [60.0%]; ENGIE SA [20.0%]; Chubu Electric Power Co Inc [10.0%]; Tokyo Electric Power Co [10.0%]	24.4348	54.4876	exact	Abu Dhabi			Abu Dhabi	https://www.gem.wiki/Umm_Al_Nar_West_and_East_Integrated_Water_and_power_plant	L100000405598	G100000405064	FR0010208488	0.2	3078		43	2021	2061	2101	12	12	12	12	12	12	12	12	12	12	12	12
oil/gas	United Arab Emirates	Asia	Western Asia	Umm Al Nar West and East Integrated Water and power plant	ST2	محطة أم النار الغربية للطاقة	Umm Al Nar East plant/UAN East/Umm Al Nar West cogeneration plant	60	operating	1981		ST	NG/FO					Arabian Power Company PJSC [100.0%]	Arabian United Power Company PJSC [60.0%]; ENGIE SA [20.0%]; Chubu Electric Power Co Inc [10.0%]; Tokyo Electric Power Co [10.0%]	24.4348	54.4876	exact	Abu Dhabi			Abu Dhabi	https://www.gem.wiki/Umm_Al_Nar_West_and_East_Integrated_Water_and_power_plant	L100000405598	G100000405065	FR0010208488	0.2	3078		43	2021	2061	2101	12	12	12	12	12	12	12	12	12	12	12	12
oil/gas	United Arab Emirates	Asia	Western Asia	Umm Al Nar West and East Integrated Water and power plant	ST3	محطة أم النار الغربية للطاقة	Umm Al Nar East plant/UAN East/Umm Al Nar West cogeneration plant	60	operating	1981		ST	NG/FO					Arabian Power Company PJSC [100.0%]	Arabian United Power Company PJSC [60.0%]; ENGIE SA [20.0%]; Chubu Electric Power Co Inc [10.0%]; Tokyo Electric Power Co [10.0%]	24.4348	54.4876	exact	Abu Dhabi			Abu Dhabi	https://www.gem.wiki/Umm_Al_Nar_West_and_East_Integrated_Water_and_power_plant	L100000405598	G100000405066	FR0010208488	0.2	3078		43	2021	2061	2101	12	12	12	12	12	12	12	12	12	12	12	12
oil/gas	United Arab Emirates	Asia	Western Asia	Umm Al Nar West and East Integrated Water and power plant	ST4	محطة أم النار الغربية للطاقة	Umm Al Nar East plant/UAN East/Umm Al Nar West cogeneration plant	60	operating	1981		ST	NG/FO					Arabian Power Company PJSC [100.0%]	Arabian United Power Company PJSC [60.0%]; ENGIE SA [20.0%]; Chubu Electric Power Co Inc [10.0%]; Tokyo Electric Power Co [10.0%]	24.4348	54.4876	exact	Abu Dhabi			Abu Dhabi	https://www.gem.wiki/Umm_Al_Nar_West_and_East_Integrated_Water_and_power_plant	L100000405598	G100000405067	FR0010208488	0.2	3078		43	2021	2061	2101	12	12	12	12	12	12	12	12	12	12	12	12
oil/gas	United Arab Emirates	Asia	Western Asia	Umm Al Nar West and East Integrated Water and power plant	ST5	محطة أم النار الغربية للطاقة	Umm Al Nar East plant/UAN East/Umm Al Nar West cogeneration plant	60	operating	1981		ST	NG/FO					Arabian Power Company PJSC [100.0%]	Arabian United Power Company PJSC [60.0%]; ENGIE SA [20.0%]; Chubu Electric Power Co Inc [10.0%]; Tokyo Electric Power Co [10.0%]	24.4348	54.4876	exact	Abu Dhabi			Abu Dhabi	https://www.gem.wiki/Umm_Al_Nar_West_and_East_Integrated_Water_and_power_plant	L100000405598	G100000405068	FR0010208488	0.2	3078		43	2021	2061	2101	12	12	12	12	12	12	12	12	12	12	12	12
oil/gas	United Arab Emirates	Asia	Western Asia	Umm Al Nar West and East Integrated Water and power plant	ST6	محطة أم النار الغربية للطاقة	Umm Al Nar East plant/UAN East/Umm Al Nar West cogeneration plant	60	operating	1981		ST	NG/FO					Arabian Power Company PJSC [100.0%]	Arabian United Power Company PJSC [60.0%]; ENGIE SA [20.0%]; Chubu Electric Power Co Inc [10.0%]; Tokyo Electric Power Co [10.0%]	24.4348	54.4876	exact	Abu Dhabi			Abu Dhabi	https://www.gem.wiki/Umm_Al_Nar_West_and_East_Integrated_Water_and_power_plant	L100000405598	G100000405069	FR0010208488	0.2	3078		43	2021	2061	2101	12	12	12	12	12	12	12	12	12	12	12	12
oil/gas	United Arab Emirates	Asia	Western Asia	Umm Al Nar West and East Integrated Water and power plant	ST7	محطة أم النار الغربية للطاقة	Umm Al Nar East plant/UAN East/Umm Al Nar West cogeneration plant	150	operating	1998		ST	NG/FO					Arabian Power Company PJSC [100.0%]	Arabian United Power Company PJSC [60.0%]; ENGIE SA [20.0%]; Chubu Electric Power Co Inc [10.0%]; Tokyo Electric Power Co [10.0%]	24.4348	54.4876	exact	Abu Dhabi			Abu Dhabi	https://www.gem.wiki/Umm_Al_Nar_West_and_East_Integrated_Water_and_power_plant	L100000405598	G100000405070	FR0010208488	0.2	3078		26	2038	2078	2118	30	30	30	30	30	30	30	30	30	30	30	30
oil/gas	United Arab Emirates	Asia	Western Asia	Umm Al Nar West and East Integrated Water and power plant	ST8	محطة أم النار الغربية للطاقة	Umm Al Nar East plant/UAN East/Umm Al Nar West cogeneration plant	150	operating	1998		ST	NG/FO					Arabian Power Company PJSC [100.0%]	Arabian United Power Company PJSC [60.0%]; ENGIE SA [20.0%]; Chubu Electric Power Co Inc [10.0%]; Tokyo Electric Power Co [10.0%]	24.4348	54.4876	exact	Abu Dhabi			Abu Dhabi	https://www.gem.wiki/Umm_Al_Nar_West_and_East_Integrated_Water_and_power_plant	L100000405598	G100000405071	FR0010208488	0.2	3078		26	2038	2078	2118	30	30	30	30	30	30	30	30	30	30	30	30
oil/gas	United Arab Emirates	Asia	Western Asia	Umm Al Nar West and East Integrated Water and power plant	CC	محطة أم النار الغربية للطاقة	Umm Al Nar Gas Thermal IWPP Project/New Umm Al Nar plant/UAN (Sas Al Nakhl) cogeneration CCGT/Sas Al Nakheel (SASN) power station	2300	operating	2007	2027	CC	NG					Abu Dhabi National Energy Company PJSC [60.0%]; Engie Energy France [20.0%]; JERA Co Inc [20.0%]	Abu Dhabi National Energy Company PJSC [60.0%]; ENGIE SA [20.0%]; Chubu Electric Power Co Inc [10.0%]; Tokyo Electric Power Co [10.0%]	24.4348	54.4876	exact	Abu Dhabi			Abu Dhabi	https://www.gem.wiki/Umm_Al_Nar_West_and_East_Integrated_Water_and_power_plant	L100000405598	G100000410458	FR0010208488	0.2	3078	3078	17	2047	2087	2127	460	460	460	460	460	460	460	460	460	460	460	460
oil/gas	Saudi Arabia	Asia	Western Asia	Uthmaniyah cogeneration Gas power plant	GT1	محطة توليد العثمانية		155	operating	2006		GT	NG					Tihama Power Generation Co Ltd [100.0%]	ENGIE SA [60.0%]; Saudi Oger Ltd [40.0%]	25.19	49.307	exact	Uthmaniyah			Eastern	https://www.gem.wiki/Uthmaniyah_cogeneration_Gas_power_plant	L100000405566	G100000404980	FR0010208488	0.6	496.7		18	2046	2086	2126	93	93	93	93	93	93	93	93	93	93	93	93
oil/gas	Saudi Arabia	Asia	Western Asia	Uthmaniyah cogeneration Gas power plant	GT2	محطة توليد العثمانية		155	operating	2006		GT	NG					Tihama Power Generation Co Ltd [100.0%]	ENGIE SA [60.0%]; Saudi Oger Ltd [40.0%]	25.19	49.307	exact	Uthmaniyah			Eastern	https://www.gem.wiki/Uthmaniyah_cogeneration_Gas_power_plant	L100000405566	G100000404981	FR0010208488	0.6	496.7		18	2046	2086	2126	93	93	93	93	93	93	93	93	93	93	93	93
oil/gas	Saudi Arabia	Asia	Western Asia	Uthmaniyah cogeneration Gas power plant	GT3	محطة توليد العثمانية		186.7	operating	2015		GT	NG					Tihama Power Generation Co Ltd [100.0%]	ENGIE SA [60.0%]; Saudi Oger Ltd [40.0%]	25.19	49.307	exact	Uthmaniyah			Eastern	https://www.gem.wiki/Uthmaniyah_cogeneration_Gas_power_plant	L100000405566	G100000404982	FR0010208488	0.6	496.7	496.7	9	2055	2095	2135	112.02	112.02	112.02	112.02	112.02	112.02	112.02	112.02	112.02	112.02	112.02	112.02
oil/gas	Italy	Europe	Southern Europe	Vado Ligure power station	VL5			800	operating	2007		CC	NG					Tirreno Power SpA [100.0%]	ENGIE SA [50.0%]; Energia Italiana SpA [50.0%]	44.2755	8.4305	exact	Vado Ligure			Savona	https://www.gem.wiki/Vado_Ligure_power_station	L100000102858	G100000400475	FR0010208488	0.5	800	800	17	2047	2087	2127	400	400	400	400	400	400	400	400	400	400	400	400
oil/gas	Belgium	Europe	Western Europe	Vilvoorde power station	1			255	operating	2001		GT	NG					Electrabel NV/SA [100%]	ENGIE SA [100.0%]	50.9414	4.4246	exact	Vilvoorde			Flemish Brabant	https://www.gem.wiki/Vilvoorde_power_station	L100000400037	G100000400037	FR0010208488	1	1125		23	2041	2081	2121	255	255	255	255	255	255	255	255	255	255	255	255
oil/gas	Belgium	Europe	Western Europe	Vilvoorde power station	2			870	shelved	2025		CC	NG					Electrabel NV/SA [100%]	ENGIE SA [100.0%]	50.9414	4.4246	exact	Vilvoorde			Flemish Brabant	https://www.gem.wiki/Vilvoorde_power_station	L100000400037	G100000406273	FR0010208488	1	1125	1125	-1	2065	2105	2145	0	0	0	0	0	0	0	0	0	0	0	0
oil/gas	France	Europe	Western Europe	Vitry-sur-Seine cogeneration power station	1			125	operating	2001		GT	NG					COGETHERM; Paris Urban Heating Company SA	City of Paris; ENGIE SA; Electricité de France SA	48.7892	2.41731	exact	Vitry-sur-Seine			Val-de-Marne	https://www.gem.wiki/Vitry-sur-Seine_cogeneration_power_station	L100000406385	G100000406298	FR0010208488	0.333333	125	125	23	2041	2081	2121	41.6667	41.6667	41.6667	41.6667	41.6667	41.6667	41.6667	41.6667	41.6667	41.6667	41.6667	41.6667
oil/gas	Italy	Europe	Southern Europe	Voghera power station	1			381	operating	2005		CC	NG					Engie Italia SpA [100.0%]	ENGIE SA [100.0%]	45.0296	8.9723	exact	Voghera			Pavia	https://www.gem.wiki/Voghera_power_station	L100000400478	G100000400478	FR0010208488	1	381	381	19	2045	2085	2125	381	381	381	381	381	381	381	381	381	381	381	381
oil/gas	Canada	Americas	Northern America	West Windsor power plant	1			135.4	operating	1996		CC	NG					West Windsor Power [100.0%]	ENGIE SA	42.2807	-83.0876	exact	Windsor			Ontario	https://www.gem.wiki/West_Windsor_power_plant	L100000405257	G100000404228	FR0010208488	1	135.4	135.4	28	2036	2076	2116	135.4	135.4	135.4	135.4	135.4	135.4	135.4	135.4	135.4	135.4	135.4	135.4
oil/gas	Belgium	Europe	Western Europe	Wilmarsdonk Total power station	1			43	operating			GT	NG					Electrabel NV/SA [100%]	ENGIE SA [100.0%]	51.2717	4.3262	exact	Antwerp			Antwerp	https://www.gem.wiki/Wilmarsdonk_Total_power_station	L100000406371	G100000406279	FR0010208488	1	129		-99	40	80	120	43	43	43	43	43	43	43	43	43	43	43	43
oil/gas	Belgium	Europe	Western Europe	Wilmarsdonk Total power station	2			43	operating			GT	NG					Electrabel NV/SA [100%]	ENGIE SA [100.0%]	51.2717	4.3262	exact	Antwerp			Antwerp	https://www.gem.wiki/Wilmarsdonk_Total_power_station	L100000406371	G100000406278	FR0010208488	1	129		-99	40	80	120	43	43	43	43	43	43	43	43	43	43	43	43
oil/gas	Belgium	Europe	Western Europe	Wilmarsdonk Total power station	3			43	operating			GT	NG					Electrabel NV/SA [100%]	ENGIE SA [100.0%]	51.2717	4.3262	exact	Antwerp			Antwerp	https://www.gem.wiki/Wilmarsdonk_Total_power_station	L100000406371	G100000406277	FR0010208488	1	129	129	-99	40	80	120	43	43	43	43	43	43	43	43	43	43	43	43
oil/gas	Belgium	Europe	Western Europe	Zandvliet power station	1			386.2	operating	2005		CC	NG					Zandvliet Power NV [100%]	BASF Antwerpen NV [50.0%]; ENGIE SA [50.0%]	51.3689	4.26419	exact	Antwerp			Antwerp	https://www.gem.wiki/Zandvliet_Power_Station	L100000400038	G100000400038	FR0010208488	0.5	386.2	386.2	19	2045	2085	2125	193.1	193.1	193.1	193.1	193.1	193.1	193.1	193.1	193.1	193.1	193.1	193.1
oil/gas	Belgium	Europe	Western Europe	Zeebrugge 2 Fluxys power station	1			40	operating	1987		GT	NG					Electrabel NV/SA [100%]	ENGIE SA [100.0%]	51.3518	3.20869	exact	Bruges			West Flanders	https://www.gem.wiki/Zeebrugge_2_Fluxys_power_station	L100000400039	G100000400039	FR0010208488	1	40	40	37	2027	2067	2107	40	40	40	40	40	40	40	40	40	40	40	0
oil/gas	Belgium	Europe	Western Europe	Zelzate 2 Knippegroen power station	1			315	operating	2010		ST	NG/BFG					Electrabel NV/SA [100%]	ENGIE SA [100.0%]	51.1587	3.8068	exact	Gent			East Flanders	https://www.gem.wiki/Zelzate_2_Knippegroen_power_station	L100000407649	G100000409988	FR0010208488	1	315	315	14	2050	2090	2130	315	315	315	315	315	315	315	315	315	315	315	315
oil/gas	Belgium	Europe	Western Europe	Zwijndrecht Lanxess power station	1			58	operating	2010		CC	NG					Electrabel NV/SA [100%]	ENGIE SA [100.0%]	51.2382	4.3408	exact	Zwijndrecht			Antwerp	https://www.gem.wiki/Zwijndrecht_Lanxess_power_station	L100000400040	G100000400040	FR0010208488	1	58	58	14	2050	2090	2130	58	58	58	58	58	58	58	58	58	58	58	58
geothermal	Indonesia	Asia	South-eastern Asia	Muarah Laboh geothermal plant	1		Muara Laboh	85	operating	2019		flash steam - double						Sumitomo CORP [18%]; ENGIE [18%]; PT Supreme Energy [30%]; INPEX Corp [33%]		-1.6268	101.13	exact		Pauh Duo		West Sumatra	https://gem.wiki/Muarah_Laboh_geothermal_plant	L100000700113	G100000700188	FR0010208488	0.18	160		5	2059	2099	2139	15.3	15.3	15.3	15.3	15.3	15.3	15.3	15.3	15.3	15.3	15.3	15.3
geothermal	Indonesia	Asia	South-eastern Asia	Muarah Laboh geothermal plant	2		Muara Laboh	75	construction			unknown type						Sumitomo CORP [18%]; ENGIE [18%]; PT Supreme Energy [30%]; INPEX Corp [33%]		-1.6268	101.13	exact		Pauh Duo		West Sumatra	https://gem.wiki/Muarah_Laboh_geothermal_plant	L100000700113	G100000700189	FR0010208488	0.18	160	160	-99	40	80	120	0	0	0	0	0	0	0	13.5	13.5	13.5	13.5	13.5
geothermal	Indonesia	Asia	South-eastern Asia	Rajabasa geothermal power plant	1			110	construction	2025		unknown type						ENGIE [33%]; PT Supreme Energy [33%]; Sumitomo Corp [33%]		-5.7817	105.626	approximate		Gunung Rajabasa	South Lampung Regency	Lampung Province	https://gem.wiki/Rajabasa_geothermal_power_plant	L100000700144	G100000700237	FR0010208488	0.33	220		-1	2065	2105	2145	0	0	0	0	0	36.3	36.3	36.3	36.3	36.3	36.3	36.3
geothermal	Indonesia	Asia	South-eastern Asia	Rajabasa geothermal power plant	2			110	construction	2025		unknown type						ENGIE [33%]; PT Supreme Energy [33%]; Sumitomo Corp [33%]		-5.7817	105.626	approximate		Gunung Rajabasa	South Lampung Regency	Lampung Province	https://gem.wiki/Rajabasa_geothermal_power_plant	L100000700144	G100000700238	FR0010208488	0.33	220	220	-1	2065	2105	2145	0	0	0	0	0	36.3	36.3	36.3	36.3	36.3	36.3	36.3
geothermal	Indonesia	Asia	South-eastern Asia	Rantau Dedep geothermal power plant	1			91	operating	2021		unknown type						Tohoku Electric Power CO INC [10%]; PT Supreme Energy [25%]; Marubeni CORP [27%]; ENGIE [37%]		-4.2069	103.386	exact	Swarna Dwipa	Muara Enim		South Sumatra	https://gem.wiki/Rantau_Dedep_geothermal_power_plant	L100000700146	G100000700240	FR0010208488	0.37	91	91	3	2061	2101	2141	0	33.67	33.67	33.67	33.67	33.67	33.67	33.67	33.67	33.67	33.67	33.67
hydropower	Portugal	Europe	Southern Europe	Baixo Sabor Montante hydroelectric plant				153	operating	2016		pumped storage				TRUE	FALSE	ENGIE [40%]; Crédit Agricole Assurances [35%]; Mirova [25%]		41.2279	-7.0146	exact		Bragança			https://gem.wiki/Baixo_Sabor_Montante_hydroelectric_plant	L603190	G603225	FR0010208488	0.4	153	153	8	2056	2096	2136	61.2	61.2	61.2	61.2	61.2	61.2	61.2	61.2	61.2	61.2	61.2	61.2
hydropower	Portugal	Europe	Southern Europe	Bemposta hydroelectric plant				240	operating	1964		run-of-river				TRUE	FALSE	ENGIE [40%]; Crédit Agricole Assurances [35%]; Mirova [25%]		41.3011	-6.4697	exact		Bragança			https://gem.wiki/Bemposta_hydroelectric_plant	L603192	G603227	FR0010208488	0.4	240	240	60	2004	2044	2084	96	96	96	96	96	96	96	96	96	96	96	96
hydropower	Portugal	Europe	Southern Europe	Bemposta II hydroelectric plant				203	operating	2011		run-of-river				TRUE	FALSE	ENGIE [40%]; Crédit Agricole Assurances [35%]; Mirova [25%]		41.3007	-6.4698	exact			Zamora	Castile and León	https://gem.wiki/Bemposta_II_hydroelectric_plant	L603193	G603228	FR0010208488	0.4	203	203	13	2051	2091	2131	81.2	81.2	81.2	81.2	81.2	81.2	81.2	81.2	81.2	81.2	81.2	81.2
hydropower	Belgium	Europe	Western Europe	Coo I hydroelectric plant				474	operating	1972		pumped storage				TRUE	FALSE	ENGIE		50.3846	5.8616	exact		Verviers		Liège	https://gem.wiki/Coo_I_hydroelectric_plant	L600149	G600149	FR0010208488	1	474	474	52	2012	2052	2092	474	474	474	474	474	474	474	474	474	474	474	474
hydropower	Belgium	Europe	Western Europe	Coo II hydroelectric plant				690	operating	1972		pumped storage				TRUE	FALSE	ENGIE		50.3846	5.8616	exact		Verviers		Liège	https://gem.wiki/Coo_II_hydroelectric_plant	L600150	G600150	FR0010208488	1	690	690	52	2012	2052	2092	690	690	690	690	690	690	690	690	690	690	690	690
hydropower	United Kingdom	Europe	Northern Europe	Dinorwig hydroelectric plant				2016	operating	1984		run-of-river				TRUE	FALSE	ENGIE		53.1206	-4.1153	exact		Gwynedd		Wales	https://gem.wiki/Dinorwig_hydroelectric_plant	L603700	G603738	FR0010208488	1	2016	2016	40	2024	2064	2104	2016	2016	2016	2016	2016	2016	2016	2016	2016	2016	2016	2016
hydropower	United Kingdom	Europe	Northern Europe	Ffestiniog hydroelectric plant				384	operating	1963		run-of-river				TRUE	FALSE	ENGIE		52.9808	-3.9686	exact		Gwynedd		Wales	https://gem.wiki/Ffestiniog_hydroelectric_plant	L603704	G603742	FR0010208488	1	384	384	61	2003	2043	2083	384	384	384	384	384	384	384	384	384	384	384	384
hydropower	Portugal	Europe	Southern Europe	Foz Tua hydroelectric plant				268	operating	2017		pumped storage				TRUE	FALSE	ENGIE [40%]; Crédit Agricole Assurances [35%]; Mirova [25%]		41.2188	-7.4229	exact		Vila Real			https://gem.wiki/Foz_Tua_hydroelectric_plant	L603199	G603234	FR0010208488	0.4	268	268	7	2057	2097	2137	107.2	107.2	107.2	107.2	107.2	107.2	107.2	107.2	107.2	107.2	107.2	107.2
hydropower	France	Europe	Western Europe	Maregès hydroelectric plant				146	operating	1935		run-of-river				TRUE	FALSE	ENGIE		45.3917	2.3646	exact		Corrèze		Nouvelle-Aquitaine	https://gem.wiki/Maregès_hydroelectric_plant	L601656	G601675	FR0010208488	1	146	146	89	1975	2015	2055	146	146	146	146	146	146	146	146	146	146	146	146
hydropower	Portugal	Europe	Southern Europe	Miranda Douro hydroelectric plant			Miranda	180	operating	1960		run-of-river				TRUE	FALSE	ENGIE [40%]; Crédit Agricole Assurances [35%]; Mirova [25%]		41.4898	-6.2639	exact	Miranda do Douro	Bragança			https://gem.wiki/Miranda_Douro_hydroelectric_plant	L603202	G603237	FR0010208488	0.4	180	180	64	2000	2040	2080	72	72	72	72	72	72	72	72	72	72	72	72
hydropower	Portugal	Europe	Southern Europe	Miranda II hydroelectric plant				189	operating	1995		run-of-river				TRUE	FALSE	ENGIE [40%]; Crédit Agricole Assurances [35%]; Mirova [25%]		41.4889	-6.2639	exact	Miranda do Douro	Bragança			https://gem.wiki/Miranda_II_hydroelectric_plant	L603203	G603238	FR0010208488	0.4	189	189	29	2035	2075	2115	75.6	75.6	75.6	75.6	75.6	75.6	75.6	75.6	75.6	75.6	75.6	75.6
hydropower	Portugal	Europe	Southern Europe	Picote hydroelectric plant				195	operating	1958		run-of-river				TRUE	FALSE	ENGIE [40%]; Crédit Agricole Assurances [35%]; Mirova [25%]		41.3783	-6.3516	exact	Miranda do Douro	Bragança			https://gem.wiki/Picote_hydroelectric_plant	L604096	G604135	FR0010208488	0.4	195	195	66	1998	2038	2078	78	78	78	78	78	78	78	78	78	78	78	78
hydropower	Portugal	Europe	Southern Europe	Picote II hydroelectric plant				245	operating	2011		run-of-river				TRUE	FALSE	ENGIE [40%]; Crédit Agricole Assurances [35%]; Mirova [25%]		41.3783	-6.3516	exact	Miranda do Douro	Bragança			https://gem.wiki/Picote_II_hydroelectric_plant	L604097	G604136	FR0010208488	0.4	245	245	13	2051	2091	2131	98	98	98	98	98	98	98	98	98	98	98	98
hydropower	Peru	Americas	Latin America and the Caribbean	Quitarasca hydroelectric plant		Central Hidroeléctrica Quitarasca		114	operating	2016		run-of-river				TRUE	FALSE	ENGIE Energía Perú SA		-9.5001	-77.7501	approximate			Quitarasca	Ancash	https://gem.wiki/Quitarasca_hydroelectric_plant	L603114	G603149	FR0010208488	1	114	114	8	2056	2096	2136	114	114	114	114	114	114	114	114	114	114	114	114
hydropower	Germany	Europe	Western Europe	Reisach hydroelectric plant				107	operating	1955		pumped storage				TRUE	FALSE	ENGIE		49.5302	12.2846	exact		Landkreis Schwandorf		Bavaria	https://gem.wiki/Reisach_hydroelectric_plant	L601736	G601755	FR0010208488	1	107	107	69	1995	2035	2075	107	107	107	107	107	107	107	107	107	107	107	107
hydropower	France	Europe	Western Europe	Saint Pierre hydroelectric plant			St Pierre de Marèges	122	operating			run-of-river				TRUE	FALSE	ENGIE		45.3906	2.3663	exact		Corrèze		Nouvelle-Aquitaine	https://gem.wiki/Saint_Pierre_hydroelectric_plant	L601678	G601697	FR0010208488	1	122	122	-99	40	80	120	122	122	122	122	122	122	122	122	122	122	122	122
hydropower	Peru	Americas	Latin America and the Caribbean	Yucán hydroelectric plant		Central Hidroeléctrica Yucán		130	operating	2005		conventional storage				TRUE	FALSE	ENGIE		-10.7222	-75.6441	exact				Pasco	https://gem.wiki/Yucán_hydroelectric_plant	L603133	G603168	FR0010208488	1	130	130	19	2045	2085	2125	130	130	130	130	130	130	130	130	130	130	130	130
solar	United States	Americas	Northern America	ANSON Solar Center			Sand Fork Solar	200	operating	2021		PV						ENGIE		32.811	-99.9175	exact	Anson	Jones County		Texas	https://gem.wiki/ANSON_Solar_Center	L804456	G805123	FR0010208488	1	200	200	3	2061	2101	2141	0	200	200	200	200	200	200	200	200	200	200	200
solar	United States	Americas	Northern America	Azure Sky Solar				225	operating	2021		PV						ENGIE		33.02	-99.595	exact	Haskell	Haskell County		Texas	https://gem.wiki/Azure_Sky_Solar	L805049	G805820	FR0010208488	1	225	225	3	2061	2101	2141	0	225	225	225	225	225	225	225	225	225	225	225
solar	India	Asia	Southern Asia	Bhadla (Engie) Solar Park				190	operating	2018		PV						ENGIE		27.5182	71.9306	approximate	Bhadla		Jodhpur	Rajasthan	https://gem.wiki/Bhadla_(Engie)_Solar_Park	L800508	G800611	FR0010208488	1	190	190	6	2058	2098	2138	190	190	190	190	190	190	190	190	190	190	190	190
solar	United States	Americas	Northern America	Bluestone Solar				50	operating	2021		PV						ENGIE		36.8115	-78.4839	exact	Chase City	Mecklenburg County		Virginia	https://gem.wiki/Bluestone_Solar	L805050	G805821	FR0010208488	1	50	50	3	2061	2101	2141	0	50	50	50	50	50	50	50	50	50	50	50
solar	United States	Americas	Northern America	Five Wells Solar Center				355	construction	2023		PV						ENGIE		30.9986	-97.259	exact		Bell County		Texas	https://gem.wiki/Five_Wells_Solar_Center	L832896	G838513	FR0010208488	1	355	355	1	2063	2103	2143	0	0	0	355	355	355	355	355	355	355	355	355
solar	United States	Americas	Northern America	Flat Run Solar Project				55	pre-construction	2024		PV						ENGIE		37.3741	-85.353	approximate		Taylor County		Kentucky	https://gem.wiki/Flat_Run_Solar_Project	L832898	G838515	FR0010208488	1	55	55	0	2064	2104	2144	0	0	0	0	55	55	55	55	55	55	55	55
solar	United States	Americas	Northern America	Hopkins solar farm				250	pre-construction			PV						ENGIE		33.1225	-95.733	approximate		Hopkins County		Texas	https://gem.wiki/Hopkins_solar_farm	L804457	G805124	FR0010208488	1	250	250	-99	40	80	120	250	250	250	250	250	250	250	250	250	250	250	250
solar	United States	Americas	Northern America	Horseshoe Bend Solar Project				60	pre-construction	2024		PV						ENGIE		37.2644	-85.5717	approximate		Green County		Kentucky	https://gem.wiki/Horseshoe_Bend_Solar_Project	L832974	G838594	FR0010208488	1	60	60	0	2064	2104	2144	0	0	0	0	60	60	60	60	60	60	60	60
solar	India	Asia	Southern Asia	Kadapa (Engie) Ultra Mega Solar Park	1			200	operating	2019		PV						ENGIE		14.9185	78.2867	approximate			Kadapa	Andhra Pradesh	https://gem.wiki/Kadapa_(Engie)_Ultra_Mega_Solar_Park	L800509	G800612	FR0010208488	1	250		5	2059	2099	2139	200	200	200	200	200	200	200	200	200	200	200	200
solar	India	Asia	Southern Asia	Kadapa (Engie) Ultra Mega Solar Park	2			50	operating	2020		PV						ENGIE		14.9185	78.2867	approximate			Kadapa	Andhra Pradesh	https://gem.wiki/Kadapa_(Engie)_Ultra_Mega_Solar_Park	L800509	G800613	FR0010208488	1	250	250	4	2060	2100	2140	50	50	50	50	50	50	50	50	50	50	50	50
solar	United States	Americas	Northern America	Long Draw Solar			ENGIE Long Draw Solar	225	operating	2020		PV						ENGIE		32.7414	-101.622	exact		Borden County		Texas	https://gem.wiki/Long_Draw_Solar	L804458	G805125	FR0010208488	1	225	225	4	2060	2100	2140	225	225	225	225	225	225	225	225	225	225	225	225
solar	United States	Americas	Northern America	Mt. Olive Creek Solar Project				60	pre-construction	2024		PV						ENGIE		37.0133	-85.5058	approximate		Adair County		Kentucky	https://gem.wiki/Mt._Olive_Creek_Solar_Project	L833100	G838739	FR0010208488	1	60	60	0	2064	2104	2144	0	0	0	0	60	60	60	60	60	60	60	60
solar	United States	Americas	Northern America	Powells Creek (ENGIE) Solar				70	construction	2023		PV						ENGIE		36.5547	-79.0286	approximate		Halifax County		Virginia	https://gem.wiki/Powells_Creek_(ENGIE)_Solar	L808501	G810730	FR0010208488	1	70	70	1	2063	2103	2143	0	0	0	70	70	70	70	70	70	70	70	70
solar	United States	Americas	Northern America	Ridgeview Solar				50	pre-construction	2026		PV						ENGIE		39.0314	-82.6289	approximate		Jackson County		Ohio	https://gem.wiki/Ridgeview_Solar	L833217	G838899	FR0010208488	1	50		-2	2066	2106	2146	0	0	0	0	0	0	50	50	50	50	50	50
solar	United States	Americas	Northern America	Salt City Solar Project				50	construction	2023		PV						ENGIE		39.4147	-82.9629	exact		Ross County		Ohio	https://gem.wiki/Salt_City_Solar_Project	L808519	G810751	FR0010208488	1	50		1	2063	2103	2143	0	0	0	50	50	50	50	50	50	50	50	50
solar	United States	Americas	Northern America	Solaire Holman Solar Project			Brewster solar farm, Hecate Alpine Mcgill	50	operating	2017		PV						ENGIE		30.4551	-103.475	exact		Brewster County		Texas	https://gem.wiki/Solaire_Holman_Solar_Project	L804460	G805127	FR0010208488	1	50		7	2057	2097	2137	50	50	50	50	50	50	50	50	50	50	50	50
solar	United States	Americas	Northern America	Solidago (ENGIE) Solar				50	operating	2022		PV						ENGIE		39.3952	-75.7535	exact		New Castle County		Delaware	https://gem.wiki/Solidago_(ENGIE)_Solar	L808534	G810778	FR0010208488	1	50	50	2	2062	2102	2142	0	0	50	50	50	50	50	50	50	50	50	50
solar	United States	Americas	Northern America	Sunnybrook Solar Project				51	operating	2022		PV						ENGIE		36.7987	-78.8396	approximate		Halifax County		Virginia	https://gem.wiki/Sunnybrook_Solar_Project	L808540	G810784	FR0010208488	1	51	51	2	2062	2102	2142	0	0	51	51	51	51	51	51	51	51	51	51
solar	United States	Americas	Northern America	Vermillion River_MN_GRE DEA-GM solar farm				3	operating	2019		PV						ENGIE Generation North America LLC [100.0%]		44.5998	-93.1361	exact	Farmington	Dakota		Minnesota	https://gem.wiki/Vermillion_River_MN_GRE_DEA-GM_solar_farm	L815552	G818426	FR0010208488	1	3	3	5	2059	2099	2139	3	3	3	3	3	3	3	3	3	3	3	3
solar	India	Asia	Southern Asia	Vijaypura (Engie) solar farm			Dada Kala (Mirzapur)	75	operating	2018		PV						ENGIE		25.1001	82.3619	exact		Mirzapur	Mirzapur District	Uttar Pradesh	https://gem.wiki/Vijaypura_(Engie)_solar_farm	L800510	G800614	FR0010208488	1	75	75	6	2058	2098	2138	75	75	75	75	75	75	75	75	75	75	75	75
solar	United States	Americas	Northern America	Whitehorn Solar				50	operating	2021		PV						ENGIE		36.9314	-79.3587	exact	Gretna	Pittsylvania County		Virginia	https://gem.wiki/Whitehorn_Solar	L805052	G805823	FR0010208488	1	50	50	3	2061	2101	2141	0	50	50	50	50	50	50	50	50	50	50	50
wind	Canada	Americas	Northern America	AIM SOP wind farm	Clear Creek			10	operating	2008		onshore						ENGIE		42.5863	-80.5532	exact					https://gem.wiki/AIM_SOP_wind_farm	L921828	G927111	FR0010208488	1	40		16	2048	2088	2128	10	10	10	10	10	10	10	10	10	10	10	10
wind	Canada	Americas	Northern America	AIM SOP wind farm	Cultus			10	operating	2008		onshore						ENGIE		42.5871	-80.5872	exact					https://gem.wiki/AIM_SOP_wind_farm	L921828	G927112	FR0010208488	1	40		16	2048	2088	2128	10	10	10	10	10	10	10	10	10	10	10	10
wind	Canada	Americas	Northern America	AIM SOP wind farm	Frogmore			10	operating	2008		onshore						ENGIE		42.5845	-80.5595	exact					https://gem.wiki/AIM_SOP_wind_farm	L921828	G927113	FR0010208488	1	40		16	2048	2088	2128	10	10	10	10	10	10	10	10	10	10	10	10
wind	Canada	Americas	Northern America	AIM SOP wind farm	Mohawk Point			10	operating	2008		onshore						ENGIE		42.862	-79.4907	exact					https://gem.wiki/AIM_SOP_wind_farm	L921828	G927114	FR0010208488	1	40	40	16	2048	2088	2128	10	10	10	10	10	10	10	10	10	10	10	10
wind	Italy	Europe	Southern Europe	Elimi wind farm				38	operating	2022		onshore						ENGIE		37.7832	12.7163	approximate					https://gem.wiki/Elimi_wind_farm	L920402	G925066	FR0010208488	1	38	38	2	2062	2102	2142	0	0	38	38	38	38	38	38	38	38	38	38
wind	Belgium	Europe	Western Europe	Hammont-Achel wind farm			Industriezone Bosstraat	14	pre-construction			onshore						ENGIE SA		51.245	5.5093	approximate					https://gem.wiki/Hammont-Achel_wind_farm	L919310	G923801	FR0010208488	1	14	14	-99	40	80	120	14	14	14	14	14	14	14	14	14	14	14	14
wind	United Kingdom	Europe	Northern Europe	Moray East wind farm				950	operating	2022		offshore hard mount						EDP Renewables; ENGIE; China Three Gorges CORP (CTG); Diamond Green LTD; INPEX CORP [16.7%]		58.188	-2.72	approximate				Scotland	https://gem.wiki/Moray_East_wind_farm	L916287	G920099	FR0010208488	0.2	950	950	2	2062	2102	2142	0	0	190	190	190	190	190	190	190	190	190	190
wind	United Kingdom	Europe	Northern Europe	Moray West wind farm				882	pre-construction	2024		offshore mount unknown						EDP Renewables [50%]; ENGIE [50%]		58.0699	-3.3131	exact					https://gem.wiki/Moray_West_wind_farm	L916288	G920100	FR0010208488	0.5	882	882	0	2064	2104	2144	0	0	0	0	441	441	441	441	441	441	441	441
wind	India	Asia	Southern Asia	Tihitwa wind farm				30	operating	2017		onshore						ENGIE		22.8177	70.8346	approximate		Tithwa	Morbi	Gujarat	https://gem.wiki/Tihitwa_wind_farm	L900316	G900382	FR0010208488	1	30	30	7	2057	2097	2137	30	30	30	30	30	30	30	30	30	30	30	30
wind	India	Asia	Southern Asia	Tuticorin (Engie) wind farm				252	operating	2019		onshore						ENGIE		8.8053	78.1453	approximate			Tuticorin	Tamil Nadu	https://gem.wiki/Tuticorin_(Engie)_wind_farm	L900317	G900383	FR0010208488	1	252	252	5	2059	2099	2139	252	252	252	252	252	252	252	252	252	252	252	252
																																					TOTAL Capacity	32033.1	32400.2	31996.7	32471.7	32753.7	33321.3	33371.3	32899.7	32899.7	32899.7	32899.7	32575.9
																																					Coal	2168.74	1977.1	1574.1	1574.1	1240.1	485.1	485.1	0	0	0	0	0
																																					Oil&Gas	23617.9	23617.9	23288.4	23288.4	23288.4	24538.4	24538.4	24538.4	24538.4	24538.4	24538.4	24214.6
																																					Fossil fuel	25786.6	25595	24862.5	24862.5	24528.5	25023.5	25023.5	24538.4	24538.4	24538.4	24538.4	24214.6
																																					Renewables	6246.5	21690.3	37134.2	41134.2	45134.2	49134.2	55134.2	61134.2	67134.2	73134.2	79134.2	79458
																																					Oil	2487.02	2487.02	2487.02	2487.02	2487.02	2487.02	2487.02	2487.02	2487.02	2487.02	2487.02	2487.02
																																					Gas	22294.9	22294.9	21965.4	21965.4	21965.4	23215.4	23215.4	23215.4	23215.4	23215.4	23215.4	22891.6
																																					Nuclear	0	0	0	0	0	0	0	0	0	0	0	0
																																					Wind	336	336	564	564	1005	1005	1005	1005	1005	1005	1005	1005
																																					solar	1043	1568	1669	2144	2319	2319	2369	2369	2369	2369	2369	2369
																																					hydropower	4852.2	4852.2	4852.2	4852.2	4852.2	4852.2	4852.2	4852.2	4852.2	4852.2	4852.2	4852.2
																																					geothermal	15.3	48.97	48.97	48.97	48.97	121.57	121.57	135.07	135.07	135.07	135.07	135.07
[truncated: 19 more columns]

## Sheet: Engie_fossilfuel
Type	Country/area	Region	Subregion	Plant / Project name	Unit / Phase name	Plant / Project name (local)	Plant / Project name (other)	Capacity (MW)	Status	Start year	Retired year	Technology	Fuel	Country/area 1 (hydropower only)	Country/area 2 (hydropower only)	Country/area 1 Capacity (MW) (hydropower only)	Country/area 2 Capacity (MW) (hydropower only)	Owner	Parent	Latitude	Longitude	Location accuracy	City	Local area (taluk, county)	Major area (prefecture, district)	Subnational unit (state, province)	GEM.Wiki URL	GEM location ID	GEM unit/phase ID	CompISIN	Ownership	Plant capacity	Plant capacity	Age	Reinvestment year	Reinvestment year	Reinvestment year	Coal capacity factor 2020	Gas capacity factor 2020	Oil capacity factor 2020	Coal capacity factor 2021	Gas capacity factor 2021	Oil capacity factor 2021	Coal capacity factor 2022	Gas capacity factor 2022	Oil capacity factor 2022	Coal capacity factor 2023	Gas capacity factor 2023	Oil capacity factor 2023
coal	Chile	Americas	Latin America and the Caribbean	Andina-Hornitos power station	Unit 1	Termoeléctrica Andina-Hornitos	Andina power station (Unit 1), Central Termoeléctrica Andina (CTA) (Unit 1), Central Termoeléctrica Hornitos (CTH) (Unit 2), Hornitos power station (Unit 2)	177	operating	2011	2025	CFB	bituminous					ENGIE Energía Chile [100%]	ENGIE Energía Chile [100.0%]	-23.0877	-70.4075	exact	Mejillones			Antofagasta Region	https://www.gem.wiki/Andina-Hornitos_power_station	L100000100181	G100000100194	FR0010208488	1	1065		13	2051	2091	2131	0.4153	0	0	0.752063	0	0	0.566382	0	0	0.433044	0	0
coal	Chile	Americas	Latin America and the Caribbean	Andina-Hornitos power station	Unit 2	Termoeléctrica Andina-Hornitos	Andina power station (Unit 1), Central Termoeléctrica Andina (CTA) (Unit 1), Central Termoeléctrica Hornitos (CTH) (Unit 2), Hornitos power station (Unit 2)	178	operating	2012	2025	CFB	bituminous					ENGIE Energía Chile [100%]	ENGIE Energía Chile [100.0%]	-23.0877	-70.4075	exact	Mejillones			Antofagasta Region	https://www.gem.wiki/Andina-Hornitos_power_station	L100000100181	G100000100195	FR0010208488	1	1065	1065	12	2052	2092	2132	0.4153	0	0	0.752063	0	0	0.566382	0	0	0.433044	0	0
coal	France	Europe	Western Europe	Goro power station	Unit 1			50	operating	2008	2025	subcritical	unknown					Prony Énergies [100%]	ENERCAL SA [75.0%]; ENGIE SA [25.0%]	-22.3302	166.912	exact	Goro	Le Mont-Dore Municipality	Sud	New Caledonia	https://www.gem.wiki/Goro_power_station	L100000104548	G100000114107	FR0010208488	0.25	300		16	2048	2088	2128	0.4153	0	0	0.752063	0	0	0.566382	0	0	0.433044	0	0
coal	France	Europe	Western Europe	Goro power station	Unit 2			50	operating	2008	2025	subcritical	unknown					Prony Énergies [100%]	ENERCAL SA [75.0%]; ENGIE SA [25.0%]	-22.3302	166.912	exact	Goro	Le Mont-Dore Municipality	Sud	New Caledonia	https://www.gem.wiki/Goro_power_station	L100000104548	G100000114108	FR0010208488	0.25	300	300	16	2048	2088	2128	0.4153	0	0	0.752063	0	0	0.566382	0	0	0.433044	0	0
coal	Peru	Americas	Latin America and the Caribbean	Ilo power station	Unit 1	Central Termoeléctrica de Ilo	Ilo 21	135	retired	1999	2022	subcritical	bituminous					ENGIE Energía Perú [100%]	ENGIE Energía Perú [100.0%]	-17.776	-71.1893	exact	Ilo	Pacocha	Ilo	Moquegua	https://www.gem.wiki/Ilo_power_station	L100000103158	G100000104832	FR0010208488	1	4275	4275	25	2039	2079	2119	0.4153	0	0	0.752063	0	0	0.566382	0	0	0.433044	0	0
coal	Chile	Americas	Latin America and the Caribbean	Mejillones power station	Unit 1	Termoeléctrica Mejillones	Infraestructura Energética de Mejillones, IEM1 (Unit 4), IEM2 (Unit 5), Red Dragon (Unit 4, Unit 5)	160	operating	1996	2024	subcritical	bituminous					ENGIE Energía Chile [100%]	ENGIE Energía Chile [100.0%]	-23.0892	-70.4103	exact	Mejillones		Antofagasta	Antofagasta Region	https://www.gem.wiki/Mejillones_power_station	L100000100184	G100000106831	FR0010208488	1	3987		28	2036	2076	2116	0.4153	0	0	0.752063	0	0	0.566382	0	0	0.433044	0	0
coal	Chile	Americas	Latin America and the Caribbean	Mejillones power station	Unit 2	Termoeléctrica Mejillones	Infraestructura Energética de Mejillones, IEM1 (Unit 4), IEM2 (Unit 5), Red Dragon (Unit 4, Unit 5)	174	operating	1998	2024	subcritical	bituminous					ENGIE Energía Chile [100%]	ENGIE Energía Chile [100.0%]	-23.0892	-70.4103	exact	Mejillones		Antofagasta	Antofagasta Region	https://www.gem.wiki/Mejillones_power_station	L100000100184	G100000106832	FR0010208488	1	3987		26	2038	2078	2118	0.4153	0	0	0.752063	0	0	0.566382	0	0	0.433044	0	0
coal	Chile	Americas	Latin America and the Caribbean	Mejillones power station	Unit 4	Termoeléctrica Mejillones	Infraestructura Energética de Mejillones, IEM1 (Unit 4), IEM2 (Unit 5), Red Dragon (Unit 4, Unit 5)	375	operating	2019	2025	subcritical	bituminous					ENGIE Energía Chile [100%]	ENGIE Energía Chile [100.0%]	-23.0892	-70.4103	exact	Mejillones		Antofagasta	Antofagasta Region	https://www.gem.wiki/Mejillones_power_station	L100000100184	G100000106833	FR0010208488	1	3987	3987	5	2059	2099	2139	0.4153	0	0	0.752063	0	0	0.566382	0	0	0.433044	0	0
coal	Portugal	Europe	Southern Europe	Pego power station	Unit 1			341	retired	1992	2021	subcritical	bituminous					Tejo Energia [100%]	Endesa SA [43.8%]; ENGIE SA [28.1%]; Marubeni Corp [28.1%]	39.4682	-8.10923	exact	Pego	Abrantes	Médio Tejo	Santarém	https://www.gem.wiki/Pego_power_station	L100000103283	G100000107913	FR0010208488	0.281	2046		32	2032	2072	2112	0.4153	0	0	0.752063	0	0	0.566382	0	0	0.433044	0	0
coal	Portugal	Europe	Southern Europe	Pego power station	Unit 2			341	retired	1995	2021	subcritical	bituminous					Tejo Energia [100%]	Endesa SA [43.8%]; ENGIE SA [28.1%]; Marubeni Corp [28.1%]	39.4682	-8.10923	exact	Pego	Abrantes	Médio Tejo	Santarém	https://www.gem.wiki/Pego_power_station	L100000103283	G100000107914	FR0010208488	0.281	2046	2046	29	2035	2075	2115	0.4153	0	0	0.752063	0	0	0.566382	0	0	0.433044	0	0
coal	Morocco	Africa	Northern Africa	Safi power station	Unit 1			693	operating	2018		ultra-supercritical	unknown					Safi Energy Company [100%]	ENGIE SA [35.0%]; Nareva Holding SA [35.0%]; Mitsui & Co Ltd [30.0%]	32.1491	-9.28229	exact	Cap Ghir Safi			Souss-Massa	https://www.gem.wiki/Safi_power_station	L100000103053	G100000108700	FR0010208488	0.35	4158		6	2058	2098	2138	0.4153	0	0	0.752063	0	0	0.566382	0	0	0.433044	0	0
coal	Morocco	Africa	Northern Africa	Safi power station	Unit 2			693	operating	2018		ultra-supercritical	unknown					Safi Energy Company [100%]	ENGIE SA [35.0%]; Nareva Holding SA [35.0%]; Mitsui & Co Ltd [30.0%]	32.1491	-9.28229	exact	Cap Ghir Safi			Souss-Massa	https://www.gem.wiki/Safi_power_station	L100000103053	G100000108701	FR0010208488	0.35	4158	4158	6	2058	2098	2138	0.4153	0	0	0.752063	0	0	0.566382	0	0	0.433044	0	0
coal	Chile	Americas	Latin America and the Caribbean	Tocopilla power station	Unit 14	Termoeléctrica Tocopilla		136	retired	1987	2022	subcritical	subbituminous					ENGIE Energía Chile [100%]	ENGIE Energía Chile [100.0%]	-22.0964	-70.2118	exact	Tocopilla		Tocopilla	Antofagasta Region	https://www.gem.wiki/Tocopilla_power_station	L100000100186	G100000110211	FR0010208488	1	1986		37	2027	2067	2107	0.4153	0	0	0.752063	0	0	0.566382	0	0	0.433044	0	0
coal	Chile	Americas	Latin America and the Caribbean	Tocopilla power station	Unit 15	Termoeléctrica Tocopilla		132	retired	1990	2022	subcritical	subbituminous					ENGIE Energía Chile [100%]	ENGIE Energía Chile [100.0%]	-22.0964	-70.2118	exact	Tocopilla		Tocopilla	Antofagasta Region	https://www.gem.wiki/Tocopilla_power_station	L100000100186	G100000110212	FR0010208488	1	1986	1986	34	2030	2070	2110	0.4153	0	0	0.752063	0	0	0.566382	0	0	0.433044	0	0
oil/gas	Belgium	Europe	Western Europe	Aalst Syral power station	1			48	operating	2000		CC	NG					Electrabel NV/SA [100%]	ENGIE SA [100.0%]	50.9355	4.04516	exact	Aalst			East Flanders	https://www.gem.wiki/Aalst_Syral_power_station	L100000400016	G100000400016	FR0010208488	1	144	144	24	2040	2080	2120	0	0.460441	0	0	0.478243	0	0	0.481739	0	0	0.420835	0
oil/gas	Bahrain	Asia	Western Asia	Al Ezzel power station	CC1	محطة العزل لإنتاج الكهرباء	El Ezzel CCGT Power Plant Bahrain	471	operating	2007		CC	NG					Al Ezzel Power Company BSC [100.0%]	ENGIE SA [45.0%]; Gulf Investment Corp [45.0%]; Social Insurance Organization (Bahrain)	26.2175	50.6595	exact	Al Hidd			Muharraq	https://www.gem.wiki/Al_Ezzel_power_station	L100000405455	G100000404587	FR0010208488	0.45	2826		17	2047	2087	2127	0	0.460441	0	0	0.478243	0	0	0.481739	0	0	0.420835	0
oil/gas	Bahrain	Asia	Western Asia	Al Ezzel power station	CC2	محطة العزل لإنتاج الكهرباء	El Ezzel CCGT Power Plant Bahrain	471	operating	2007		CC	NG					Al Ezzel Power Company BSC [100.0%]	ENGIE SA [45.0%]; Gulf Investment Corp [45.0%]; Social Insurance Organization (Bahrain)	26.2175	50.6595	exact	Al Hidd			Muharraq	https://www.gem.wiki/Al_Ezzel_power_station	L100000405455	G100000404588	FR0010208488	0.45	2826	2826	17	2047	2087	2127	0	0.460441	0	0	0.478243	0	0	0.481739	0	0	0.420835	0
oil/gas	Bahrain	Asia	Western Asia	Al Hidd Power and Water Station	1	محطة الحد لإنتاج الكهرباء	Al Hidd power plant/Al-Hidd IWPP	987	operating	2003		CC	NG					Hidd Power Company BSC [100.0%]	Malakoff Corporation Bhd [40.0%]; ENGIE SA [30.0%]; Sumitomo Corp [30.0%]	26.2223	50.6621	exact	Al Hidd			Muharraq	https://www.gem.wiki/Al_Hidd_Power_and_Water_Station	L100000405457	G100000404589	FR0010208488	0.3	2961	2961	21	2043	2083	2123	0	0.460441	0	0	0.478243	0	0	0.481739	0	0	0.420835	0
oil/gas	Belgium	Europe	Western Europe	Amercoeur power station	1			451	operating	2010		CC	NG					Electrabel NV/SA [100%]	ENGIE SA [100.0%]	50.4304	4.3955	exact	Roux			Hainaut	https://www.gem.wiki/Amercoeur_power_station	L100000100087	G100000400017	FR0010208488	1	2313		14	2050	2090	2130	0	0.460441	0	0	0.478243	0	0	0.481739	0	0	0.420835	0
oil/gas	Belgium	Europe	Western Europe	Amercoeur power station	2			320	shelved	2025		GT	NG					Electrabel NV/SA [100%]	ENGIE SA [100.0%]	50.4304	4.3955	exact	Roux			Hainaut	https://www.gem.wiki/Amercoeur_power_station	L100000100087	G100000406282	FR0010208488	1	2313	2313	-1	2065	2105	2145	0	0.460441	0	0	0.478243	0	0	0.481739	0	0	0.420835	0
oil/gas	Italy	Europe	Southern Europe	Arkema Marghera power station	1			20	operating	2013		ST	NG					Engie Servizi SpA [100.0%]	ENGIE SA [100.0%]	45.4502	12.2259	exact	Porto Marghera			Venice	https://www.gem.wiki/Arkema_Marghera_power_station	L100000400343	G100000400343	FR0010208488	1	60	60	11	2053	2093	2133	0	0.460441	0	0	0.478243	0	0	0.481739	0	0	0.420835	0
oil/gas	United States	Americas	Northern America	Astoria Energy II power station	CC1			650	operating	2011		CC	NG/FO					Astoria Energy II LLC [100.0%]	Algemene Pensioen Groep NV; Bank HaPoalim; Clal Insurance Enterprises Holdings Ltd; ENGIE SA; Harbert-managed funds; IDB Development Group; Munich RE Co; SNC-Lavalin; other	40.7813	-73.8966	exact	Astoria	Queens		New York	https://www.gem.wiki/Astoria_Energy_II_power_station	L100000401729	G100000402047	FR0010208488	0.111111	1950	1950	13	2051	2091	2131	0	0.460441	0	0	0.478243	0	0	0.481739	0	0	0.420835	0
oil/gas	South Africa	Africa	Sub-Saharan Africa	Avon power station	1			167.5	operating	2016		GT	NG/D					Avon Peaking Power (RF) Pty Ltd [100.0%]	ENGIE SA [38.0%]; Legend Power Solutions Pty Ltd [27.0%]; Mitsui & Co Ltd [25.0%]; The Peaker Trust [10.0%]	-29.4189	31.1577	exact	Ballito			KwaZulu-Natal	https://www.gem.wiki/Avon_power_station	L100000407110	G100000408559	FR0010208488	0.38	2010		8	2056	2096	2136	0	0.460441	0	0	0.478243	0	0	0.481739	0	0	0.420835	0
oil/gas	South Africa	Africa	Sub-Saharan Africa	Avon power station	2			167.5	operating	2016		GT	NG/D					Avon Peaking Power (RF) Pty Ltd [100.0%]	ENGIE SA [38.0%]; Legend Power Solutions Pty Ltd [27.0%]; Mitsui & Co Ltd [25.0%]; The Peaker Trust [10.0%]	-29.4189	31.1577	exact	Ballito			KwaZulu-Natal	https://www.gem.wiki/Avon_power_station	L100000407110	G100000414451	FR0010208488	0.38	2010		8	2056	2096	2136	0	0.460441	0	0	0.478243	0	0	0.481739	0	0	0.420835	0
oil/gas	South Africa	Africa	Sub-Saharan Africa	Avon power station	3			167.5	operating	2016		GT	NG/D					Avon Peaking Power (RF) Pty Ltd [100.0%]	ENGIE SA [38.0%]; Legend Power Solutions Pty Ltd [27.0%]; Mitsui & Co Ltd [25.0%]; The Peaker Trust [10.0%]	-29.4189	31.1577	exact	Ballito			KwaZulu-Natal	https://www.gem.wiki/Avon_power_station	L100000407110	G100000414450	FR0010208488	0.38	2010		8	2056	2096	2136	0	0.460441	0	0	0.478243	0	0	0.481739	0	0	0.420835	0
oil/gas	South Africa	Africa	Sub-Saharan Africa	Avon power station	4			167.5	operating	2016		GT	NG/D					Avon Peaking Power (RF) Pty Ltd [100.0%]	ENGIE SA [38.0%]; Legend Power Solutions Pty Ltd [27.0%]; Mitsui & Co Ltd [25.0%]; The Peaker Trust [10.0%]	-29.4189	31.1577	exact	Ballito			KwaZulu-Natal	https://www.gem.wiki/Avon_power_station	L100000407110	G100000414449	FR0010208488	0.38	2010	2010	8	2056	2096	2136	0	0.460441	0	0	0.478243	0	0	0.481739	0	0	0.420835	0
oil/gas	Germany	Europe	Western Europe	Barmen power station	GT1		Wuppertal-Barmen	34	mothballed	1978		GT	NG/HFO					WSW Energie & Wasser AG [100.0%]	WSW Wuppertaler Stadtwerke GmbH [66.9%]; ENGIE SA [33.1%]	51.2689	7.2003	exact	Wuppertal			Nordrhein-Westfalen	https://www.gem.wiki/Barmen_power_station	L100000400114	G100000412908	FR0010208488	0.331	468		46	2018	2058	2098	0	0.460441	0	0	0.478243	0	0	0.481739	0	0	0.420835	0
oil/gas	Germany	Europe	Western Europe	Barmen power station	GT2		Wuppertal-Barmen	34	mothballed	1978		GT	NG/HFO					WSW Energie & Wasser AG [100.0%]	WSW Wuppertaler Stadtwerke GmbH [66.9%]; ENGIE SA [33.1%]	51.2689	7.2003	exact	Wuppertal			Nordrhein-Westfalen	https://www.gem.wiki/Barmen_power_station	L100000400114	G100000412907	FR0010208488	0.331	468		46	2018	2058	2098	0	0.460441	0	0	0.478243	0	0	0.481739	0	0	0.420835	0
oil/gas	Germany	Europe	Western Europe	Barmen power station	CC1		Wuppertal-Barmen	88	operating	2005		CC	NG					WSW Energie & Wasser AG [100.0%]	WSW Wuppertaler Stadtwerke GmbH [66.9%]; ENGIE SA [33.1%]	51.2689	7.2003	exact	Wuppertal			Nordrhein-Westfalen	https://www.gem.wiki/Barmen_power_station	L100000400114	G100000400114	FR0010208488	0.331	468	468	19	2045	2085	2125	0	0.460441	0	0	0.478243	0	0	0.481739	0	0	0.420835	0
oil/gas	Belgium	Europe	Western Europe	Beerse power station	IC			33	operating			ICCC	HFO					Electrabel NV/SA	ENGIE SA	51.3261	4.853	exact					https://www.gem.wiki/Beerse_power_station	L100001000036	G100001000101	FR0010208488	1	99	99	-99	40	80	120	0	0	0.103825	0	0	0.200028	0	0	0.244559	0	0	0.164121
oil/gas	Netherlands	Europe	Western Europe	Bergum power station	10GT			72	operating	2019		GT	NG					Engie Energie Nederland NV [100%]	ENGIE SA [100.0%]	53.2097	6.02959	exact	Bergum			Friesland	https://www.gem.wiki/Bergum_power_station	L100000400499	G100000409942	FR0010208488	1	2424		5	2059	2099	2139	0	0.460441	0	0	0.478243	0	0	0.481739	0	0	0.420835	0
oil/gas	Netherlands	Europe	Western Europe	Bergum power station	20GT			72	operating	2019		GT	NG					Engie Energie Nederland NV [100%]	ENGIE SA [100.0%]	53.2097	6.02959	exact	Bergum			Friesland	https://www.gem.wiki/Bergum_power_station	L100000400499	G100000409941	FR0010208488	1	2424		5	2059	2099	2139	0	0.460441	0	0	0.478243	0	0	0.481739	0	0	0.420835	0
oil/gas	Netherlands	Europe	Western Europe	Bergum power station	10			332	mothballed			CC	NG					Engie Energie Nederland NV [100%]	ENGIE SA [100.0%]	53.2097	6.02959	exact	Bergum			Friesland	https://www.gem.wiki/Bergum_power_station	L100000400499	G100000400499	FR0010208488	1	2424		-99	40	80	120	0	0.460441	0	0	0.478243	0	0	0.481739	0	0	0.420835	0
oil/gas	Netherlands	Europe	Western Europe	Bergum power station	20			332	mothballed			CC	NG					Engie Energie Nederland NV [100%]	ENGIE SA [100.0%]	53.2097	6.02959	exact	Bergum			Friesland	https://www.gem.wiki/Bergum_power_station	L100000400499	G100000400500	FR0010208488	1	2424	2424	-99	40	80	120	0	0.460441	0	0	0.478243	0	0	0.481739	0	0	0.420835	0
oil/gas	Belgium	Europe	Western Europe	Beveren Ineos Phenolchemie power station	1			23.8	operating	1993		GT	NG					Electrabel NV/SA [100%]	ENGIE SA [100.0%]	51.2909	4.27025	exact	Beveren			East Flanders	https://www.gem.wiki/Beveren_Ineos_Phenolchemie_power_station	L100000400023	G100000400023	FR0010208488	1	71.4	71.4	31	2033	2073	2113	0	0.460441	0	0	0.478243	0	0	0.481739	0	0	0.420835	0
oil/gas	Italy	Europe	Southern Europe	Boffalora power station	1			88	operating	1988		CC	NG					Engie Servizi SpA [100.0%]	ENGIE SA [100.0%]	45.456	8.79646	approximate	Boffalora Sopra Ticino			Milan	https://www.gem.wiki/Boffalora_power_station	L100000400352	G100000400352	FR0010208488	1	264	264	36	2028	2068	2108	0	0.460441	0	0	0.478243	0	0	0.481739	0	0	0.420835	0
oil/gas	United States	Americas	Northern America	Calumet Energy Team power station	CT11			156	operating	2002		GT	NG					Engie North America [100.0%]	ENGIE SA [100.0%]	41.6835	-87.5563	exact	Chicago	Cook		Illinois	https://www.gem.wiki/Calumet_Energy_Team_power_station	L100000401565	G100000402272	FR0010208488	1	936		22	2042	2082	2122	0	0.460441	0	0	0.478243	0	0	0.481739	0	0	0.420835	0
oil/gas	United States	Americas	Northern America	Calumet Energy Team power station	CT12			156	operating	2002		GT	NG					Engie North America [100.0%]	ENGIE SA [100.0%]	41.6835	-87.5563	exact	Chicago	Cook		Illinois	https://www.gem.wiki/Calumet_Energy_Team_power_station	L100000401565	G100000402273	FR0010208488	1	936	936	22	2042	2082	2122	0	0.460441	0	0	0.478243	0	0	0.481739	0	0	0.420835	0
oil/gas	Italy	Europe	Southern Europe	Castelmassa power station	1			54	operating	1994		CC	NG					Engie Servizi SpA [100.0%]	ENGIE SA [100.0%]	45.0213	11.3116	exact	Castelmassa			Rovigo	https://www.gem.wiki/Castelmassa_power_station	L100000400364	G100000400364	FR0010208488	1	162	162	30	2034	2074	2114	0	0.460441	0	0	0.478243	0	0	0.481739	0	0	0.420835	0
oil/gas	Peru	Americas	Latin America and the Caribbean	Chilca power station	1	Central Termoeléctrica Chilca		852	operating	2012		CC	NG					ENGIE Energía Perú SA [100%]	ENGIE Energía Perú SA [100.0%]	-12.5024	-76.729	exact	Chilca		Cañete	Lima	https://gem.wiki/Chilca_power_station	L100000406603	G100000406665	FR0010208488	1	2889		12	2052	2092	2132	0	0.460441	0	0	0.478243	0	0	0.481739	0	0	0.420835	0
oil/gas	Peru	Americas	Latin America and the Caribbean	Chilca power station	2	Central Termoeléctrica Chilca		111	operating	2016		CC	NG					ENGIE Energía Perú SA [100%]	ENGIE Energía Perú SA [100.0%]	-12.5024	-76.729	exact	Chilca		Cañete	Lima	https://gem.wiki/Chilca_power_station	L100000406603	G100000406666	FR0010208488	1	2889	2889	8	2056	2096	2136	0	0.460441	0	0	0.478243	0	0	0.481739	0	0	0.420835	0
oil/gas	France	Europe	Western Europe	Combigolfe power station	1	GRACIT01 - GROUPE 01 DE LA CENTRALE THERMIQUE DE GRACIEUSE (LA)		425	operating	2010		CC	NG					Engie Energy France [100.0%]	ENGIE SA [100.0%]	43.4072	4.8676	exact	Fos-sur-Mer			Bouches-du-Rhone	https://www.gem.wiki/Combigolfe_power_station	L100000400093	G100000400093	FR0010208488	1	1275	1275	14	2050	2090	2130	0	0.460441	0	0	0.478243	0	0	0.481739	0	0	0.420835	0
oil/gas	Belgium	Europe	Western Europe	Covestro Oorderen power station	1		Antwerp Bayer/Oorderen Bayer	43	operating			GT	NG					Electrabel NV/SA [100%]	ENGIE SA [100.0%]	51.297	4.31907	approximate	Antwerp			Antwerp	https://www.gem.wiki/Covestro_Oorderen_power_station	L100000406369	G100000406275	FR0010208488	1	129	129	-99	40	80	120	0	0.460441	0	0	0.478243	0	0	0.481739	0	0	0.420835	0
oil/gas	France	Europe	Western Europe	Cycofos power station	1			428	operating	2009		CC	NG					CyCoFos [100.0%]	ENGIE SA [100.0%]	43.428	4.88652	exact	Fos-sur-Mer			Bouches-du-Rhone	https://www.gem.wiki/Cycofos_power_station	L100000400095	G100000400095	FR0010208488	1	1284	1284	15	2049	2089	2129	0	0.460441	0	0	0.478243	0	0	0.481739	0	0	0.420835	0
oil/gas	South Africa	Africa	Sub-Saharan Africa	Dedisa power station	1			335	operating	2015		CC	NG/D					Dedisa Peaking Power (RF) Pty Ltd [100.0%]	ENGIE SA [38.0%]; Legend Power Solutions Pty Ltd [27.0%]; Mitsui & Co Ltd [25.0%]; The Peaker Trust [10.0%]	-33.7434	25.6728	exact	Gqeberha			Eastern Cape	https://www.gem.wiki/Dedisa_power_station	L100000407109	G100000408558	FR0010208488	0.38	1005	1005	9	2055	2095	2135	0	0.460441	0	0	0.478243	0	0	0.481739	0	0	0.420835	0
oil/gas	Belgium	Europe	Western Europe	Drogenbos power station	1			460	operating	1993		CC	NG					Electrabel NV/SA [100%]	ENGIE SA [100.0%]	50.8023	4.299	exact	Drogenbos			Flemish Brabant	https://www.gem.wiki/Drogenbos_power_station	L100000400024	G100000400024	FR0010208488	1	1716		31	2033	2073	2113	0	0.460441	0	0	0.478243	0	0	0.481739	0	0	0.420835	0
oil/gas	Belgium	Europe	Western Europe	Drogenbos power station	ST			112	mothballed	1999		ST	HFO					Electrabel NV/SA [100%]	ENGIE SA [100.0%]	50.8023	4.299	exact	Drogenbos			Flemish Brabant	https://www.gem.wiki/Drogenbos_power_station	L100000400024	G100001000100	FR0010208488	1	1716	1716	25	2039	2079	2119	0	0	0.103825	0	0	0.200028	0	0	0.244559	0	0	0.164121
oil/gas	Australia	Oceania	Australia and New Zealand	Dry Creek GT power station	1			52	operating	1973	2030	GT	NG					Synergen Power Pty Ltd [100.0%]	ENGIE SA [72.0%]; Mitsui & Co Ltd [28.0%]	-34.8475	138.577	exact	Adelaide			South Australia	https://www.gem.wiki/Dry_Creek_GT_power_station	L100000405112	G100000401509	FR0010208488	0.72	468		51	2013	2053	2093	0	0.460441	0	0	0.478243	0	0	0.481739	0	0	0.420835	0
oil/gas	Australia	Oceania	Australia and New Zealand	Dry Creek GT power station	2			52	operating	1973	2030	GT	NG					Synergen Power Pty Ltd [100.0%]	ENGIE SA [72.0%]; Mitsui & Co Ltd [28.0%]	-34.8475	138.577	exact	Adelaide			South Australia	https://www.gem.wiki/Dry_Creek_GT_power_station	L100000405112	G100000401510	FR0010208488	0.72	468		51	2013	2053	2093	0	0.460441	0	0	0.478243	0	0	0.481739	0	0	0.420835	0
oil/gas	Australia	Oceania	Australia and New Zealand	Dry Creek GT power station	3			52	operating	1973	2030	GT	NG					Synergen Power Pty Ltd [100.0%]	ENGIE SA [72.0%]; Mitsui & Co Ltd [28.0%]	-34.8475	138.577	exact	Adelaide			South Australia	https://www.gem.wiki/Dry_Creek_GT_power_station	L100000405112	G100000401511	FR0010208488	0.72	468	468	51	2013	2053	2093	0	0.460441	0	0	0.478243	0	0	0.481739	0	0	0.420835	0
oil/gas	Netherlands	Europe	Western Europe	EEM power station	EC20	Eemscentrale		131	operating	1987		GT	NG					Engie Energie Nederland NV [100%]	ENGIE SA [100.0%]	53.4417	6.85605	exact	Eemshaven			Groningen	https://www.gem.wiki/EEM_power_station	L100000400513	G100000409939	FR0010208488	1	5793		37	2027	2067	2107	0	0.460441	0	0	0.478243	0	0	0.481739	0	0	0.420835	0
oil/gas	Netherlands	Europe	Western Europe	EEM power station	EC3	Eemscentrale		360	operating	1995		CC	NG					Engie Energie Nederland NV [100%]	ENGIE SA [100.0%]	53.4417	6.85605	exact	Eemshaven			Groningen	https://www.gem.wiki/EEM_power_station	L100000400513	G100000400513	FR0010208488	1	5793		29	2035	2075	2115	0	0.460441	0	0	0.478243	0	0	0.481739	0	0	0.420835	0
oil/gas	Netherlands	Europe	Western Europe	EEM power station	EC4	Eemscentrale		360	operating	1995		CC	NG					Engie Energie Nederland NV [100%]	ENGIE SA [100.0%]	53.4417	6.85605	exact	Eemshaven			Groningen	https://www.gem.wiki/EEM_power_station	L100000400513	G100000400514	FR0010208488	1	5793		29	2035	2075	2115	0	0.460441	0	0	0.478243	0	0	0.481739	0	0	0.420835	0
oil/gas	Netherlands	Europe	Western Europe	EEM power station	EC5	Eemscentrale		360	operating	1995		CC	NG					Engie Energie Nederland NV [100%]	ENGIE SA [100.0%]	53.4417	6.85605	exact	Eemshaven			Groningen	https://www.gem.wiki/EEM_power_station	L100000400513	G100000400515	FR0010208488	1	5793		29	2035	2075	2115	0	0.460441	0	0	0.478243	0	0	0.481739	0	0	0.420835	0
oil/gas	Netherlands	Europe	Western Europe	EEM power station	EC6	Eemscentrale		360	operating	1996		CC	NG					Engie Energie Nederland NV [100%]	ENGIE SA [100.0%]	53.4417	6.85605	exact	Eemshaven			Groningen	https://www.gem.wiki/EEM_power_station	L100000400513	G100000400516	FR0010208488	1	5793		28	2036	2076	2116	0	0.460441	0	0	0.478243	0	0	0.481739	0	0	0.420835	0
oil/gas	Netherlands	Europe	Western Europe	EEM power station	EC7	Eemscentrale		360	operating	1996		CC	NG					Engie Energie Nederland NV [100%]	ENGIE SA [100.0%]	53.4417	6.85605	exact	Eemshaven			Groningen	https://www.gem.wiki/EEM_power_station	L100000400513	G100000400517	FR0010208488	1	5793	5793	28	2036	2076	2116	0	0.460441	0	0	0.478243	0	0	0.481739	0	0	0.420835	0
oil/gas	Portugal	Europe	Southern Europe	Elecgas Pego power station	G3			418	operating	2011		CC	NG					ElecGas SA [100%]	Endesa SA [50.0%]; ENGIE SA [25.0%]; Marubeni Corp [25.0%]	39.4689	-8.1113	exact	Pego			Santarem	https://www.gem.wiki/Elecgas_Pego_power_station	L100000400584	G100000400584	FR0010208488	0.25	2508		13	2051	2091	2131	0	0.460441	0	0	0.478243	0	0	0.481739	0	0	0.420835	0
oil/gas	Portugal	Europe	Southern Europe	Elecgas Pego power station	G4			418	operating	2011		CC	NG					ElecGas SA [100%]	Endesa SA [50.0%]; ENGIE SA [25.0%]; Marubeni Corp [25.0%]	39.4689	-8.1113	exact	Pego			Santarem	https://www.gem.wiki/Elecgas_Pego_power_station	L100000400584	G100000400585	FR0010208488	0.25	2508	2508	13	2051	2091	2131	0	0.460441	0	0	0.478243	0	0	0.481739	0	0	0.420835	0
oil/gas	Saudi Arabia	Asia	Western Asia	Fadhili cogeneration power plant	1	محطة الفاضلي لتوليد الطاقة المزدوج		1520	operating	2020		CC	NG					Fadhili Plant Cogeneration Co [100.0%]	ENGIE SA [40.0%]; Saudi Arabian Oil Co [30.0%]; Saudi Electricity Co [30.0%]	27.1123	49.0714	exact	Jubail Industrial City			Eastern	https://www.gem.wiki/Fadhili_cogeneration_power_plant	L100000405542	G100000404751	FR0010208488	0.4	4560	4560	4	2060	2100	2140	0	0.460441	0	0	0.478243	0	0	0.481739	0	0	0.420835	0
oil/gas	United Arab Emirates	Asia	Western Asia	Fujairah F2 Integrated Water and power plant	1	محطة الفجيرة F2	FAPCO (Fuj F2)/Qidfa F2 Gas Power Plant	867	operating	2011	2031	CC	NG					Fujairah Asia Power Company PJSC [100.0%]	Abu Dhabi National Energy Company PJSC [60.0%]; ENGIE SA [20.0%]; Marubeni Corp [20.0%]	25.3019	56.3704	exact	Qidfa			Fujairah	https://www.gem.wiki/Fujairah_F2_Integrated_Water_and_power_plant	L100000405577	G100000405012	FR0010208488	0.2	6498		13	2051	2091	2131	0	0.460441	0	0	0.478243	0	0	0.481739	0	0	0.420835	0
oil/gas	United Arab Emirates	Asia	Western Asia	Fujairah F2 Integrated Water and power plant	2	محطة الفجيرة F2	FAPCO (Fuj F2)/Qidfa F2 Gas Power Plant	432	operating	2011	2031	CC	NG					Fujairah Asia Power Company PJSC [100.0%]	Abu Dhabi National Energy Company PJSC [60.0%]; ENGIE SA [20.0%]; Marubeni Corp [20.0%]	25.3019	56.3704	exact	Qidfa			Fujairah	https://www.gem.wiki/Fujairah_F2_Integrated_Water_and_power_plant	L100000405577	G100000405013	FR0010208488	0.2	6498		13	2051	2091	2131	0	0.460441	0	0	0.478243	0	0	0.481739	0	0	0.420835	0
oil/gas	United Arab Emirates	Asia	Western Asia	Fujairah F2 Integrated Water and power plant	3	محطة الفجيرة F2	FAPCO (Fuj F2)/Qidfa F2 Gas Power Plant	867	operating	2011	2031	CC	NG					Fujairah Asia Power Company PJSC [100.0%]	Abu Dhabi National Energy Company PJSC [60.0%]; ENGIE SA [20.0%]; Marubeni Corp [20.0%]	25.3019	56.3704	exact	Qidfa			Fujairah	https://www.gem.wiki/Fujairah_F2_Integrated_Water_and_power_plant	L100000405577	G100000405014	FR0010208488	0.2	6498	6498	13	2051	2091	2131	0	0.460441	0	0	0.478243	0	0	0.481739	0	0	0.420835	0
oil/gas	Germany	Europe	Western Europe	Gera-Lusan power station	IC			25	operating	2018		ICCC	NG					Engie Deutschland GmbH [100.0%]	ENGIE SA [100.0%]	50.8455	12.0788	exact	Gera			Thüringen	https://www.gem.wiki/Gera-Lusan_power_station	L100000408776	G100000412890	FR0010208488	1	75	75	6	2058	2098	2138	0	0.460441	0	0	0.478243	0	0	0.481739	0	0	0.420835	0
oil/gas	Germany	Europe	Western Europe	Gera-Tinz power station	IC			20	operating	2018		ICCC	NG					Engie Deutschland GmbH [100.0%]	ENGIE SA [100.0%]	50.8942	12.0745	exact	Gera			Thüringen	https://www.gem.wiki/Gera-Tinz_power_station	L100000400265	G100000400265	FR0010208488	1	60	60	6	2058	2098	2138	0	0.460441	0	0	0.478243	0	0	0.481739	0	0	0.420835	0
oil/gas	Belgium	Europe	Western Europe	Herdersbrug power station	1			465	operating	1998		CC	NG					Electrabel NV/SA [100%]	ENGIE SA [100.0%]	51.2629	3.2112	exact	Brugge			West Flanders	https://www.gem.wiki/Herdersbrug_power_station	L100000400027	G100000400027	FR0010208488	1	1395	1395	26	2038	2078	2118	0	0.460441	0	0	0.478243	0	0	0.481739	0	0	0.420835	0
oil/gas	Peru	Americas	Latin America and the Caribbean	Ilo power station	Ilo31-TG1	Central Termoeléctrica de Ilo	Ilo 21	190	operating	2013		GT	D					ENGIE Energía Perú SA [100%]	ENGIE Energía Perú SA [100.0%]	-17.776	-71.1893	exact	Ilo	Pacocha	Ilo	Moquegua	https://www.gem.wiki/Ilo_power_station	L100000103158	G100000406662	FR0010208488	1	4275		11	2053	2093	2133	0	0	0.103825	0	0	0.200028	0	0	0.244559	0	0	0.164121
oil/gas	Peru	Americas	Latin America and the Caribbean	Ilo power station	Ilo31-TG2	Central Termoeléctrica de Ilo	Ilo 21	190	operating	2013		GT	D					ENGIE Energía Perú SA [100%]	ENGIE Energía Perú SA [100.0%]	-17.776	-71.1893	exact	Ilo	Pacocha	Ilo	Moquegua	https://www.gem.wiki/Ilo_power_station	L100000103158	G100000406661	FR0010208488	1	4275		11	2053	2093	2133	0	0	0.103825	0	0	0.200028	0	0	0.244559	0	0	0.164121
oil/gas	Peru	Americas	Latin America and the Caribbean	Ilo power station	Ilo31-TG3	Central Termoeléctrica de Ilo	Ilo 21	190	operating	2013		GT	D					ENGIE Energía Perú SA [100%]	ENGIE Energía Perú SA [100.0%]	-17.776	-71.1893	exact	Ilo	Pacocha	Ilo	Moquegua	https://www.gem.wiki/Ilo_power_station	L100000103158	G100000406660	FR0010208488	1	4275		11	2053	2093	2133	0	0	0.103825	0	0	0.200028	0	0	0.244559	0	0	0.164121
oil/gas	Peru	Americas	Latin America and the Caribbean	Ilo power station	Ilo41-TG1	Central Termoeléctrica de Ilo	Ilo 21	240	operating	2016		GT	D					ENGIE Energía Perú SA [100%]	ENGIE Energía Perú SA [100.0%]	-17.776	-71.1893	exact	Ilo	Pacocha	Ilo	Moquegua	https://www.gem.wiki/Ilo_power_station	L100000103158	G100000406654	FR0010208488	1	4275		8	2056	2096	2136	0	0	0.103825	0	0	0.200028	0	0	0.244559	0	0	0.164121
oil/gas	Peru	Americas	Latin America and the Caribbean	Ilo power station	Ilo41-TG2	Central Termoeléctrica de Ilo	Ilo 21	240	operating	2016		GT	D					ENGIE Energía Perú SA [100%]	ENGIE Energía Perú SA [100.0%]	-17.776	-71.1893	exact	Ilo	Pacocha	Ilo	Moquegua	https://www.gem.wiki/Ilo_power_station	L100000103158	G100000406653	FR0010208488	1	4275		8	2056	2096	2136	0	0	0.103825	0	0	0.200028	0	0	0.244559	0	0	0.164121
oil/gas	Peru	Americas	Latin America and the Caribbean	Ilo power station	Ilo41-TG3	Central Termoeléctrica de Ilo	Ilo 21	240	operating	2016		GT	D					ENGIE Energía Perú SA [100%]	ENGIE Energía Perú SA [100.0%]	-17.776	-71.1893	exact	Ilo	Pacocha	Ilo	Moquegua	https://www.gem.wiki/Ilo_power_station	L100000103158	G100000406652	FR0010208488	1	4275	4275	8	2056	2096	2136	0	0	0.103825	0	0	0.200028	0	0	0.244559	0	0	0.164121
oil/gas	Saudi Arabia	Asia	Western Asia	Juaymah cogeneration Gas power plant	GT1	محطة الجعيمة لتوليد الكهرباء	Ju'Aymah/Juymah	155	operating	2006		GT	NG					Tihama Power Generation Co Ltd [100.0%]	ENGIE SA [60.0%]; Saudi Oger Ltd [40.0%]	27.0196	49.5784	approximate	Jubail			Eastern	https://www.gem.wiki/Juaymah_cogeneration_Gas_power_plant	L100000405546	G100000404984	FR0010208488	0.6	1490.1		18	2046	2086	2126	0	0.460441	0	0	0.478243	0	0	0.481739	0	0	0.420835	0
oil/gas	Saudi Arabia	Asia	Western Asia	Juaymah cogeneration Gas power plant	GT2	محطة الجعيمة لتوليد الكهرباء	Ju'Aymah/Juymah	155	operating	2006		GT	NG					Tihama Power Generation Co Ltd [100.0%]	ENGIE SA [60.0%]; Saudi Oger Ltd [40.0%]	27.0196	49.5784	approximate	Jubail			Eastern	https://www.gem.wiki/Juaymah_cogeneration_Gas_power_plant	L100000405546	G100000404985	FR0010208488	0.6	1490.1		18	2046	2086	2126	0	0.460441	0	0	0.478243	0	0	0.481739	0	0	0.420835	0
oil/gas	Saudi Arabia	Asia	Western Asia	Juaymah cogeneration Gas power plant	GT3	محطة الجعيمة لتوليد الكهرباء	Ju'Aymah/Juymah	186.7	operating	2015		GT	NG					Tihama Power Generation Co Ltd [100.0%]	ENGIE SA [60.0%]; Saudi Oger Ltd [40.0%]	27.0196	49.5784	approximate	Jubail			Eastern	https://www.gem.wiki/Juaymah_cogeneration_Gas_power_plant	L100000405546	G100000404983	FR0010208488	0.6	1490.1	1490.1	9	2055	2095	2135	0	0.460441	0	0	0.478243	0	0	0.481739	0	0	0.420835	0
oil/gas	Italy	Europe	Southern Europe	Leini power station	1			380	operating	2007		CC	NG					Engie Italia SpA [100.0%]	ENGIE SA [100.0%]	45.163	7.7505	exact	Leini			Turin	https://www.gem.wiki/Leini_power_station	L100000400391	G100000400391	FR0010208488	1	1140	1140	17	2047	2087	2127	0	0.460441	0	0	0.478243	0	0	0.481739	0	0	0.420835	0
oil/gas	Belgium	Europe	Western Europe	Les Awirs power station	CC1		Centrale des Awirs	875	pre-construction	2025		CC	NG					Electrabel NV/SA [100%]	ENGIE SA [100.0%]	50.5856	5.41687	exact	Flémalle			Liege	https://www.gem.wiki/Les_Awirs_power_station	L100000406373	G100000406281	FR0010208488	1	2625	2625	-1	2065	2105	2145	0	0.460441	0	0	0.478243	0	0	0.481739	0	0	0.420835	0
oil/gas	Belgium	Europe	Western Europe	Lillo Degussa power station	1		Evonik Degussa	42	operating	1999		CC	NG					Electrabel NV/SA [100%]	ENGIE SA [100.0%]	51.3095	4.30402	exact	Antwerp			Antwerp	https://www.gem.wiki/Lillo_Degussa_power_station	L100000400030	G100000400030	FR0010208488	1	255		25	2039	2079	2119	0	0.460441	0	0	0.478243	0	0	0.481739	0	0	0.420835	0
oil/gas	Belgium	Europe	Western Europe	Lillo Degussa power station	2		Evonik Degussa	43	operating	2011		CC	NG					Electrabel NV/SA [100%]	ENGIE SA [100.0%]	51.3095	4.30402	exact	Antwerp			Antwerp	https://www.gem.wiki/Lillo_Degussa_power_station	L100000400030	G100000410396	FR0010208488	1	255	255	13	2051	2091	2131	0	0.460441	0	0	0.478243	0	0	0.481739	0	0	0.420835	0
oil/gas	Netherlands	Europe	Western Europe	Maxima power station	4			440	operating	2010		CC	NG					ENGIE SA [100%]	ENGIE SA [100.0%]	52.5772	5.53	exact	Lelystad			Flevoland	https://www.gem.wiki/Maxima_power_station	L100000400544	G100000400544	FR0010208488	1	2640		14	2050	2090	2130	0	0.460441	0	0	0.478243	0	0	0.481739	0	0	0.420835	0
oil/gas	Netherlands	Europe	Western Europe	Maxima power station	5			440	operating	2010		CC	NG					ENGIE SA [100%]	ENGIE SA [100.0%]	52.5772	5.53	exact	Lelystad			Flevoland	https://www.gem.wiki/Maxima_power_station	L100000400544	G100000400545	FR0010208488	1	2640	2640	14	2050	2090	2130	0	0.460441	0	0	0.478243	0	0	0.481739	0	0	0.420835	0
oil/gas	Chile	Americas	Latin America and the Caribbean	Mejillones power station	3	Termoeléctrica Mejillones	Red Dragon (Unit 4/Unit 5)/IEM2 (Unit 5)/IEM1 (Unit 4)/Infraestructura Energética de Mejillones	245	operating	2000		CC	NG					ENGIE Energía Chile SA [100%]	ENGIE Energía Chile SA [100.0%]	-23.0892	-70.4103	exact	Mejillones			Antofagasta	https://www.gem.wiki/Mejillones_power_station	L100000100184	G100000406727	FR0010208488	1	3987		24	2040	2080	2120	0	0.460441	0	0	0.478243	0	0	0.481739	0	0	0.420835	0
oil/gas	Chile	Americas	Latin America and the Caribbean	Mejillones power station	Unit 4	Termoeléctrica Mejillones	IEM2 (Unit 5)/Infraestructura Energética de Mejillones/Red Dragon (Unit 4/Unit 5)/IEM1 (Unit 4)	375	announced	2025		ST	NG/D					ENGIE Energía Chile SA [100%]	ENGIE Energía Chile SA [100.0%]	-23.0892	-70.4103	exact	Mejillones			Antofagasta	https://www.gem.wiki/Mejillones_power_station	L100000100184	G100000106833	FR0010208488	1	3987	3987	-1	2065	2105	2145	0	0.460441	0	0	0.478243	0	0	0.481739	0	0	0.420835	0
oil/gas	Australia	Oceania	Australia and New Zealand	Mintaro GT power station	1			90	operating	1990	2030	GT	NG					Synergen Power Pty Ltd [100.0%]	ENGIE SA [72.0%]; Mitsui & Co Ltd [28.0%]	-33.9032	138.738	exact	Stanley			South Australia	https://www.gem.wiki/Mintaro_GT_power_station	L100000405122	G100000401527	FR0010208488	0.72	270	270	34	2030	2070	2110	0	0.460441	0	0	0.478243	0	0	0.481739	0	0	0.420835	0
oil/gas	United Arab Emirates	Asia	Western Asia	Mirfa Independent Water and Power Project	1	محطة المرفأ للمنتج المستقل٫ محطة المرفأ الجديدة/محطة ميبكو	MIPCO/New Mifrah/New Al Mirfa Power Plant	90	operating	2017	2042	GT	NG					Mirfa International Power and Water Company PJSC [100.0%]	Abu Dhabi Water and Electricity Authority [60.0%]; ENGIE SA [20.0%]; Sojitz Corp [20.0%]	24.121	53.447	exact	Al Mirfa			Abu Dhabi	https://www.gem.wiki/Mirfa_Independent_Water_and_Power_Project	L100000405588	G100000405039	FR0010208488	0.2	5091		7	2057	2097	2137	0	0.460441	0	0	0.478243	0	0	0.481739	0	0	0.420835	0
oil/gas	United Arab Emirates	Asia	Western Asia	Mirfa Independent Water and Power Project	2	محطة المرفأ للمنتج المستقل٫ محطة المرفأ الجديدة/محطة ميبكو	MIPCO/New Mifrah/New Al Mirfa Power Plant	90	operating	2017	2042	GT	NG					Mirfa International Power and Water Company PJSC [100.0%]	Abu Dhabi Water and Electricity Authority [60.0%]; ENGIE SA [20.0%]; Sojitz Corp [20.0%]	24.121	53.447	exact	Al Mirfa			Abu Dhabi	https://www.gem.wiki/Mirfa_Independent_Water_and_Power_Project	L100000405588	G100000405040	FR0010208488	0.2	5091		7	2057	2097	2137	0	0.460441	0	0	0.478243	0	0	0.481739	0	0	0.420835	0
oil/gas	United Arab Emirates	Asia	Western Asia	Mirfa Independent Water and Power Project	3	محطة المرفأ للمنتج المستقل٫ محطة المرفأ الجديدة/محطة ميبكو	MIPCO/New Mifrah/New Al Mirfa Power Plant	90	operating	2017	2042	GT	NG					Mirfa International Power and Water Company PJSC [100.0%]	Abu Dhabi Water and Electricity Authority [60.0%]; ENGIE SA [20.0%]; Sojitz Corp [20.0%]	24.121	53.447	exact	Al Mirfa			Abu Dhabi	https://www.gem.wiki/Mirfa_Independent_Water_and_Power_Project	L100000405588	G100000405041	FR0010208488	0.2	5091		7	2057	2097	2137	0	0.460441	0	0	0.478243	0	0	0.481739	0	0	0.420835	0
oil/gas	United Arab Emirates	Asia	Western Asia	Mirfa Independent Water and Power Project	4	محطة المرفأ للمنتج المستقل٫ محطة المرفأ الجديدة/محطة ميبكو	MIPCO/New Mifrah/New Al Mirfa Power Plant	90	operating	2017	2042	GT	NG					Mirfa International Power and Water Company PJSC [100.0%]	Abu Dhabi Water and Electricity Authority [60.0%]; ENGIE SA [20.0%]; Sojitz Corp [20.0%]	24.121	53.447	exact	Al Mirfa			Abu Dhabi	https://www.gem.wiki/Mirfa_Independent_Water_and_Power_Project	L100000405588	G100000405042	FR0010208488	0.2	5091		7	2057	2097	2137	0	0.460441	0	0	0.478243	0	0	0.481739	0	0	0.420835	0
oil/gas	United Arab Emirates	Asia	Western Asia	Mirfa Independent Water and Power Project	CC	محطة المرفأ للمنتج المستقل٫ محطة المرفأ الجديدة/محطة ميبكو	MIPCO/New Mifrah/New Al Mirfa Power Plant	1337	operating	2017	2042	CC	NG					Mirfa International Power and Water Company PJSC [100.0%]	Abu Dhabi Water and Electricity Authority [60.0%]; ENGIE SA [20.0%]; Sojitz Corp [20.0%]	24.121	53.447	exact	Al Mirfa			Abu Dhabi	https://www.gem.wiki/Mirfa_Independent_Water_and_Power_Project	L100000405588	G100000405038	FR0010208488	0.2	5091	5091	7	2057	2097	2137	0	0.460441	0	0	0.478243	0	0	0.481739	0	0	0.420835	0
oil/gas	Belgium	Europe	Western Europe	Monsanto Oud-Lillo power station	1		Gasturbine Oud-Lillo/Oud-Lillo Monsanto	43	operating			not found	NG					Electrabel NV/SA [100%]	ENGIE SA [100.0%]	51.3155	4.28961	approximate	Antwerp			Antwerp	https://www.gem.wiki/Monsanto_Oud-Lillo_power_station	L100000406368	G100000406274	FR0010208488	1	129	129	-99	40	80	120	0	0.460441	0	0	0.478243	0	0	0.481739	0	0	0.420835	0
oil/gas	France	Europe	Western Europe	Montoir-De-Bretagne power station	1		SPEM/La Centrale Thermique de Grandes-Rivieres	435	operating	2010		CC	NG					Engie Energy France [100.0%]	ENGIE SA [100.0%]	47.3072	-2.13716	exact	Montoir-de-Bretagne			Loire-Atlantique	https://www.gem.wiki/Montoir-De-Bretagne_power_station	L100000400104	G100000400104	FR0010208488	1	1305	1305	14	2050	2090	2130	0	0.460441	0	0	0.478243	0	0	0.481739	0	0	0.420835	0
oil/gas	Italy	Europe	Southern Europe	Napoli Levante power station	1			400	operating	2009		CC	NG					Tirreno Power SpA [100.0%]	ENGIE SA [50.0%]; Energia Italiana SpA [50.0%]	40.8339	14.3006	exact	Napoli			Campania	https://www.gem.wiki/Napoli_Levante_power_station	L100000400407	G100000400407	FR0010208488	0.5	1200	1200	15	2049	2089	2129	0	0.460441	0	0	0.478243	0	0	0.481739	0	0	0.420835	0
oil/gas	United States	Americas	Northern America	Nassau Energy power station	CC1			55	retired	1991	2022	CC	NG/FO					Engie North America [100.0%]	ENGIE SA [100.0%]	40.7264	-73.5892	exact	Garden City	Nassau		New York	https://www.gem.wiki/Nassau_Energy_power_station	L100000401658	G100000401732	FR0010208488	1	165	165	33	2031	2071	2111	0	0.460441	0	0	0.478243	0	0	0.481739	0	0	0.420835	0
oil/gas	Italy	Europe	Southern Europe	Nera Montoro power station	1			50	operating	1994		CC	NG					Engie Servizi SpA [100.0%]	ENGIE SA [100.0%]	42.4943	12.4724	exact	Nera Montoro			Terni	https://www.gem.wiki/Nera_Montoro_power_station	L100000400408	G100000400408	FR0010208488	1	150	150	30	2034	2074	2114	0	0.460441	0	0	0.478243	0	0	0.481739	0	0	0.420835	0
oil/gas	United States	Americas	Northern America	Oyster Creek Unit VIII power station	CC1			498	operating	1994		CC	NG/OG					Engie North America [50.0%]; Toyota Tsusho Corp [37.5%]; GE Energy Financial Services [12.5%]	ENGIE SA [50.0%]; General Electric Co [12.5%]	28.9802	-95.342	exact	Freeport	Brazoria		Texas	https://www.gem.wiki/Oyster_Creek_Unit_VIII_power_station	L100000401670	G100000401762	FR0010208488	0.5	1494	1494	30	2034	2074	2114	0	0.460441	0	0	0.478243	0	0	0.481739	0	0	0.420835	0
oil/gas	Saudi Arabia	Asia	Western Asia	Ras Tanura Tihama power station	1	محطة توليد رأس تنورة		75	operating	2006		GT	NG					Tihama Power Generation Co Ltd [100.0%]	ENGIE SA [60.0%]; Saudi Oger Ltd [40.0%]	26.8003	50.0039	exact	Ras Tanura			Ash Sharqiyah	https://www.gem.wiki/Ras_Tanura_Tihama_power_station	L100000407703	G100000410109	FR0010208488	0.6	450		18	2046	2086	2126	0	0.460441	0	0	0.478243	0	0	0.481739	0	0	0.420835	0
oil/gas	Saudi Arabia	Asia	Western Asia	Ras Tanura Tihama power station	2	محطة توليد رأس تنورة		75	operating	2006		GT	NG					Tihama Power Generation Co Ltd [100.0%]	ENGIE SA [60.0%]; Saudi Oger Ltd [40.0%]	26.8003	50.0039	exact	Ras Tanura			Ash Sharqiyah	https://www.gem.wiki/Ras_Tanura_Tihama_power_station	L100000407703	G100000410108	FR0010208488	0.6	450	450	18	2046	2086	2126	0	0.460441	0	0	0.478243	0	0	0.481739	0	0	0.420835	0
oil/gas	Saudi Arabia	Asia	Western Asia	Riyadh PP11 power station	2	محطة الكهرباء الخامسة		824	operating	1979		CC	NG/LFO					Dhuruma O&M Co Ltd [100.0%]	ENGIE SA [80.0%]; Aljomaih Energy & Water Co Ltd [20.0%]	24.7734	46.6563	exact	Dhurma - Riyadh			Ar Riyad	https://www.gem.wiki/Riyadh_PP11_power_station	L100000407708	G100000410127	FR0010208488	0.8	5415		45	2019	2059	2099	0	0.460441	0	0	0.478243	0	0	0.481739	0	0	0.420835	0
oil/gas	Saudi Arabia	Asia	Western Asia	Riyadh PP11 power station	1	محطة الكهرباء الخامسة		981	operating	2013		CC	NG/LFO					Dhuruma O&M Co Ltd [100.0%]	ENGIE SA [80.0%]; Aljomaih Energy & Water Co Ltd [20.0%]	24.7734	46.6563	exact	Dhurma - Riyadh			Ar Riyad	https://www.gem.wiki/Riyadh_PP11_power_station	L100000407708	G100000410128	FR0010208488	0.8	5415	5415	11	2053	2093	2133	0	0.460441	0	0	0.478243	0	0	0.481739	0	0	0.420835	0
oil/gas	Germany	Europe	Western Europe	Romerbrucke power station	2b	HKW Römerbrücke/Kraftwerk Römerbrücke	Saarland power plant	53	operating	1965		ST	NG					Energie SaarLorLux AG [100.0%]	ENGIE SA [51.0%]; Stadtwerke Saarbrücken GmbH [49.0%]	49.2239	7.0149	exact	Saarbrücken			Saarland	https://www.gem.wiki/Romerbrucke_power_station	L100000101975	G100000409751	FR0010208488	0.51	531		59	2005	2045	2085	0	0.460441	0	0	0.478243	0	0	0.481739	0	0	0.420835	0
oil/gas	Germany	Europe	Western Europe	Romerbrucke power station	1	HKW Römerbrücke/Kraftwerk Römerbrücke	Saarland power plant	74	operating	2005		CC	NG					Energie SaarLorLux AG [100.0%]	ENGIE SA [51.0%]; Stadtwerke Saarbrücken GmbH [49.0%]	49.2239	7.0149	exact	Saarbrücken			Saarland	https://www.gem.wiki/Romerbrucke_power_station	L100000101975	G100000400242	FR0010208488	0.51	531		19	2045	2085	2125	0	0.460441	0	0	0.478243	0	0	0.481739	0	0	0.420835	0
oil/gas	Germany	Europe	Western Europe	Romerbrucke power station	IC	HKW Römerbrücke/Kraftwerk Römerbrücke	Saarland power plant	50	operating	2022		ICCC	NG					Energie SaarLorLux AG [100.0%]	ENGIE SA [51.0%]; Stadtwerke Saarbrücken GmbH [49.0%]	49.2239	7.0149	exact	Saarbrücken			Saarland	https://www.gem.wiki/Romerbrucke_power_station	L100000101975	G100000412845	FR0010208488	0.51	531	531	2	2062	2102	2142	0	0.460441	0	0	0.478243	0	0	0.481739	0	0	0.420835	0
oil/gas	Belgium	Europe	Western Europe	Saint-Ghislain power station	1			350	operating	2001		CC	NG					Electrabel NV/SA [100%]	ENGIE SA [100.0%]	50.4719	3.8248	exact	Baudour			Hainaut	https://www.gem.wiki/Saint-Ghislain_power_station	L100000400033	G100000400033	FR0010208488	1	1050	1050	23	2041	2081	2121	0	0.460441	0	0	0.478243	0	0	0.481739	0	0	0.420835	0
oil/gas	France	Europe	Western Europe	Saint-Ouen-sur-Seine power station	1	CENTRALE THERMIQUE DE BATELIERS		128	operating	2001		GT	NG					Paris Urban Heating Company SA [100.0%]	ENGIE SA [66.0%]; City of Paris [33.0%]	48.9117	2.32764	exact	Saint-Ouen-sur-Seine			Ile-de-France	https://www.gem.wiki/Saint-Ouen-sur-Seine_power_station	L100000407655	G100000409982	FR0010208488	0.66	384	384	23	2041	2081	2121	0	0.460441	0	0	0.478243	0	0	0.481739	0	0	0.420835	0
oil/gas	Belgium	Europe	Western Europe	Sappi Lanaken power station	1			43	operating			not found	NG					Electrabel NV/SA [100%]	ENGIE SA [100.0%]	50.8827	5.64195	exact	Lanaken			Limburg Province	https://www.gem.wiki/Sappi_Lanaken_power_station	L100000406370	G100000406276	FR0010208488	1	129	129	-99	40	80	120	0	0.460441	0	0	0.478243	0	0	0.481739	0	0	0.420835	0
oil/gas	Belgium	Europe	Western Europe	Scheldelaan Exxonmobil power station	1			140	operating	2009		not found	NG					Electrabel NV/SA [100%]	ENGIE SA [100.0%]	51.254	4.334	exact	Antwerp			Antwerp	https://www.gem.wiki/Scheldelaan_Exxonmobil_power_station	L100000400034	G100000400034	FR0010208488	1	420	420	15	2049	2089	2129	0	0.460441	0	0	0.478243	0	0	0.481739	0	0	0.420835	0
oil/gas	Singapore	Asia	South-eastern Asia	Senoko power station	1			425	operating	1996		CC	NG					Senoko Energy Pte Ltd [100.0%]	ENGIE SA [30.0%]; Marubeni Corp [30.0%]; Kansai Electric Power Co [15.0%]; Kyushu Electric Power Co Inc [15.0%]; Japan Bank for International Cooperation [10.0%]	1.4655	103.8	exact	Sembawang			North Region	https://www.gem.wiki/Senoko_power_station	L100000405353	G100000404571	FR0010208488	0.3	9876		28	2036	2076	2116	0	0.460441	0	0	0.478243	0	0	0.481739	0	0	0.420835	0
oil/gas	Singapore	Asia	South-eastern Asia	Senoko power station	2			425	operating	1996		CC	NG					Senoko Energy Pte Ltd [100.0%]	ENGIE SA [30.0%]; Marubeni Corp [30.0%]; Kansai Electric Power Co [15.0%]; Kyushu Electric Power Co Inc [15.0%]; Japan Bank for International Cooperation [10.0%]	1.4655	103.8	exact	Sembawang			North Region	https://www.gem.wiki/Senoko_power_station	L100000405353	G100000404572	FR0010208488	0.3	9876		28	2036	2076	2116	0	0.460441	0	0	0.478243	0	0	0.481739	0	0	0.420835	0
oil/gas	Singapore	Asia	South-eastern Asia	Senoko power station	3			360	operating	2002		CC	NG					Senoko Energy Pte Ltd [100.0%]	ENGIE SA [30.0%]; Marubeni Corp [30.0%]; Kansai Electric Power Co [15.0%]; Kyushu Electric Power Co Inc [15.0%]; Japan Bank for International Cooperation [10.0%]	1.4655	103.8	exact	Sembawang			North Region	https://www.gem.wiki/Senoko_power_station	L100000405353	G100000404573	FR0010208488	0.3	9876		22	2042	2082	2122	0	0.460441	0	0	0.478243	0	0	0.481739	0	0	0.420835	0
oil/gas	Singapore	Asia	South-eastern Asia	Senoko power station	4			360	operating	2004		CC	NG					Senoko Energy Pte Ltd [100.0%]	ENGIE SA [30.0%]; Marubeni Corp [30.0%]; Kansai Electric Power Co [15.0%]; Kyushu Electric Power Co Inc [15.0%]; Japan Bank for International Cooperation [10.0%]	1.4655	103.8	exact	Sembawang			North Region	https://www.gem.wiki/Senoko_power_station	L100000405353	G100000404574	FR0010208488	0.3	9876		20	2044	2084	2124	0	0.460441	0	0	0.478243	0	0	0.481739	0	0	0.420835	0
oil/gas	Singapore	Asia	South-eastern Asia	Senoko power station	5			360	operating	2004		CC	NG					Senoko Energy Pte Ltd [100.0%]	ENGIE SA [30.0%]; Marubeni Corp [30.0%]; Kansai Electric Power Co [15.0%]; Kyushu Electric Power Co Inc [15.0%]; Japan Bank for International Cooperation [10.0%]	1.4655	103.8	exact	Sembawang			North Region	https://www.gem.wiki/Senoko_power_station	L100000405353	G100000404575	FR0010208488	0.3	9876		20	2044	2084	2124	0	0.460441	0	0	0.478243	0	0	0.481739	0	0	0.420835	0
oil/gas	Singapore	Asia	South-eastern Asia	Senoko power station	6			431	operating	2013		CC	NG					Senoko Energy Pte Ltd [100.0%]	ENGIE SA [30.0%]; Marubeni Corp [30.0%]; Kansai Electric Power Co [15.0%]; Kyushu Electric Power Co Inc [15.0%]; Japan Bank for International Cooperation [10.0%]	1.4655	103.8	exact	Sembawang			North Region	https://www.gem.wiki/Senoko_power_station	L100000405353	G100000404576	FR0010208488	0.3	9876		11	2053	2093	2133	0	0.460441	0	0	0.478243	0	0	0.481739	0	0	0.420835	0
oil/gas	Singapore	Asia	South-eastern Asia	Senoko power station	7			431	operating	2013		CC	NG					Senoko Energy Pte Ltd [100.0%]	ENGIE SA [30.0%]; Marubeni Corp [30.0%]; Kansai Electric Power Co [15.0%]; Kyushu Electric Power Co Inc [15.0%]; Japan Bank for International Cooperation [10.0%]	1.4655	103.8	exact	Sembawang			North Region	https://www.gem.wiki/Senoko_power_station	L100000405353	G100000404577	FR0010208488	0.3	9876		11	2053	2093	2133	0	0.460441	0	0	0.478243	0	0	0.481739	0	0	0.420835	0
oil/gas	Singapore	Asia	South-eastern Asia	Senoko power station	ST1			250	operating			ST	NG/FO					Senoko Energy Pte Ltd [100.0%]	ENGIE SA [30.0%]; Marubeni Corp [30.0%]; Kansai Electric Power Co [15.0%]; Kyushu Electric Power Co Inc [15.0%]; Japan Bank for International Cooperation [10.0%]	1.4655	103.8	exact	Sembawang			North Region	https://www.gem.wiki/Senoko_power_station	L100000405353	G100000413180	FR0010208488	0.3	9876		-99	40	80	120	0	0.460441	0	0	0.478243	0	0	0.481739	0	0	0.420835	0
oil/gas	Singapore	Asia	South-eastern Asia	Senoko power station	ST2			250	operating			ST	NG/FO					Senoko Energy Pte Ltd [100.0%]	ENGIE SA [30.0%]; Marubeni Corp [30.0%]; Kansai Electric Power Co [15.0%]; Kyushu Electric Power Co Inc [15.0%]; Japan Bank for International Cooperation [10.0%]	1.4655	103.8	exact	Sembawang			North Region	https://www.gem.wiki/Senoko_power_station	L100000405353	G100000413179	FR0010208488	0.3	9876	9876	-99	40	80	120	0	0.460441	0	0	0.478243	0	0	0.481739	0	0	0.420835	0
oil/gas	Italy	Europe	Southern Europe	Settimo Torinese power station	1			60	operating	1995		CC	NG					Engie Servizi SpA [100.0%]	ENGIE SA [100.0%]	45.1261	7.73778	exact	Settimo Torinese			Turin	https://www.gem.wiki/Settimo_Torinese_power_station	L100000400450	G100000400450	FR0010208488	1	180	180	29	2035	2075	2115	0	0.460441	0	0	0.478243	0	0	0.481739	0	0	0.420835	0
oil/gas	Saudi Arabia	Asia	Western Asia	Shedgum cogeneration Gas power plant	GT1		Shedgum Aramco	155	operating	2006		GT	NG					Tihama Power Generation Co Ltd [100.0%]	ENGIE SA [60.0%]; Saudi Oger Ltd [40.0%]	25.6516	49.3855	exact	Al Ahsa			Eastern	https://www.gem.wiki/Shedgum_cogeneration_Gas_power_plant	L100000405564	G100000404986	FR0010208488	0.6	1490.1		18	2046	2086	2126	0	0.460441	0	0	0.478243	0	0	0.481739	0	0	0.420835	0
oil/gas	Saudi Arabia	Asia	Western Asia	Shedgum cogeneration Gas power plant	GT2		Shedgum Aramco	155	operating	2006		GT	NG					Tihama Power Generation Co Ltd [100.0%]	ENGIE SA [60.0%]; Saudi Oger Ltd [40.0%]	25.6516	49.3855	exact	Al Ahsa			Eastern	https://www.gem.wiki/Shedgum_cogeneration_Gas_power_plant	L100000405564	G100000404987	FR0010208488	0.6	1490.1		18	2046	2086	2126	0	0.460441	0	0	0.478243	0	0	0.481739	0	0	0.420835	0
oil/gas	Saudi Arabia	Asia	Western Asia	Shedgum cogeneration Gas power plant	GT3		Shedgum Aramco	186.7	operating	2015		GT	NG					Tihama Power Generation Co Ltd [100.0%]	ENGIE SA [60.0%]; Saudi Oger Ltd [40.0%]	25.6516	49.3855	exact	Al Ahsa			Eastern	https://www.gem.wiki/Shedgum_cogeneration_Gas_power_plant	L100000405564	G100000404988	FR0010208488	0.6	1490.1	1490.1	9	2055	2095	2135	0	0.460441	0	0	0.478243	0	0	0.481739	0	0	0.420835	0
oil/gas	United Arab Emirates	Asia	Western Asia	Shuweihat S1 power plant	1	مجمع الشويهات للطاقة والمياه/محطة الشويهات S1 المستقلة للمياه والطاقة		1615	operating	2004	2025	CC	NG					Shuweihat CMS International Power Company PJSC [100.0%]	Abu Dhabi National Energy Company PJSC [60.0%]; ENGIE SA [20.0%]; Sumitomo Corp [20.0%]	24.1651	52.5697	exact	Jebel Dhanna			Abu Dhabi	https://www.gem.wiki/Shuweihat_S1_power_plant	L100000405592	G100000405048	FR0010208488	0.2	4845	4845	20	2044	2084	2124	0	0.460441	0	0	0.478243	0	0	0.481739	0	0	0.420835	0
oil/gas	United Arab Emirates	Asia	Western Asia	Shuweihat S2 power plant	1	مجمع الشويهات للطاقة والمياه/محطة الشويهات S2 المستقلة للمياه والطاقة		820.5	operating	2011	2036	CC	NG/FO					Ruwais Power Company PJSC [100.0%]	Abu Dhabi National Energy Company PJSC [54.0%]; ENGIE SA [20.0%]; Marubeni Corp [10.0%]; Osaka Gas Co Ltd [10.0%]; Abu Dhabi Water and Electricity Authority [6.0%]	24.1569	52.5692	exact	Jebel Dhanna			Abu Dhabi	https://www.gem.wiki/Shuweihat_S2_power_plant	L100000405593	G100000405049	FR0010208488	0.2	4923		13	2051	2091	2131	0	0.460441	0	0	0.478243	0	0	0.481739	0	0	0.420835	0
oil/gas	United Arab Emirates	Asia	Western Asia	Shuweihat S2 power plant	2	مجمع الشويهات للطاقة والمياه/محطة الشويهات S2 المستقلة للمياه والطاقة		820.5	operating	2012	2036	CC	NG/FO					Ruwais Power Company PJSC [100.0%]	Abu Dhabi National Energy Company PJSC [54.0%]; ENGIE SA [20.0%]; Marubeni Corp [10.0%]; Osaka Gas Co Ltd [10.0%]; Abu Dhabi Water and Electricity Authority [6.0%]	24.1569	52.5692	exact	Jebel Dhanna			Abu Dhabi	https://www.gem.wiki/Shuweihat_S2_power_plant	L100000405593	G100000405050	FR0010208488	0.2	4923	4923	12	2052	2092	2132	0	0.460441	0	0	0.478243	0	0	0.481739	0	0	0.420835	0
oil/gas	Portugal	Europe	Southern Europe	Tapada do Outeiro power station	G1			330	operating	1998		CC	NG					TrustEnergy BV [100%]	ENGIE SA [50.0%]; Marubeni Corp [50.0%]	41.07	-8.4587	exact	Medas			Porto	https://www.gem.wiki/Tapada_do_Outeiro_power_station	L100000400593	G100000400593	FR0010208488	0.5	2970		26	2038	2078	2118	0	0.460441	0	0	0.478243	0	0	0.481739	0	0	0.420835	0
oil/gas	Portugal	Europe	Southern Europe	Tapada do Outeiro power station	G2			330	operating	1998		CC	NG					TrustEnergy BV [100%]	ENGIE SA [50.0%]; Marubeni Corp [50.0%]	41.07	-8.4587	exact	Medas			Porto	https://www.gem.wiki/Tapada_do_Outeiro_power_station	L100000400593	G100000400594	FR0010208488	0.5	2970		26	2038	2078	2118	0	0.460441	0	0	0.478243	0	0	0.481739	0	0	0.420835	0
oil/gas	Portugal	Europe	Southern Europe	Tapada do Outeiro power station	G3			330	operating	1999		CC	NG					TrustEnergy BV [100%]	ENGIE SA [50.0%]; Marubeni Corp [50.0%]	41.07	-8.4587	exact	Medas			Porto	https://www.gem.wiki/Tapada_do_Outeiro_power_station	L100000400593	G100000400595	FR0010208488	0.5	2970	2970	25	2039	2079	2119	0	0.460441	0	0	0.478243	0	0	0.481739	0	0	0.420835	0
oil/gas	United Arab Emirates	Asia	Western Asia	Taweelah A1 power plant	1	محطة الطويلة A1	Taweelah A1 Integrated Water and Power Plant	1672.5	operating	2009	2029	CC	NG					Total Tractebel Emirates O&M Co SA [100.0%]	ENGIE SA [50.0%]; TotalEnergies SE [50.0%]	24.7604	54.6797	exact	Al Taweelah			Abu Dhabi	https://www.gem.wiki/Taweelah_A1_power_plant	L100000405595	G100000405053	FR0010208488	0.5	5017.5	5017.5	15	2049	2089	2129	0	0.460441	0	0	0.478243	0	0	0.481739	0	0	0.420835	0
oil/gas	United Arab Emirates	Asia	Western Asia	Taweelah A2 power plant	2	محطة الطويلة A2	Taweelah A2 Integrated Water and Power Plant	710	retired	2001	2022	CC	NG					Total Tractebel Emirates O&M Co SA [100.0%]	ENGIE SA [50.0%]; TotalEnergies SE [50.0%]	24.761	54.6826	exact	Al Taweelah			Abu Dhabi	https://www.gem.wiki/Taweelah_A2_power_plant	L100000405596	G100000405054	FR0010208488	0.5	2130	2130	23	2041	2081	2121	0	0.460441	0	0	0.478243	0	0	0.481739	0	0	0.420835	0
oil/gas	Chile	Americas	Latin America and the Caribbean	Tocopilla power station	16	Termoeléctrica Tocopilla		394	operating	2001		CC	NG					ENGIE Energía Chile SA [100%]	ENGIE Energía Chile SA [100.0%]	-22.0964	-70.2118	exact	Tocopilla		Tocopilla	Antofagasta Region	https://www.gem.wiki/Tocopilla_power_station	L100000100186	G100000406715	FR0010208488	1	1986	1986	23	2041	2081	2121	0	0.460441	0	0	0.478243	0	0	0.481739	0	0	0.420835	0
oil/gas	Italy	Europe	Southern Europe	Torrevaldaliga Sud power station	TV5			760	operating	2004		CC	NG					Tirreno Power SpA [100.0%]	ENGIE SA [50.0%]; Energia Italiana SpA [50.0%]	42.1241	11.7624	exact	Civitavecchia			Rome	https://www.gem.wiki/Torrevaldaliga_Sud_power_station	L100000400469	G100000400469	FR0010208488	0.5	4380		20	2044	2084	2124	0	0.460441	0	0	0.478243	0	0	0.481739	0	0	0.420835	0
oil/gas	Italy	Europe	Southern Europe	Torrevaldaliga Sud power station	TV6			380	operating	2005		CC	NG					Tirreno Power SpA [100.0%]	ENGIE SA [50.0%]; Energia Italiana SpA [50.0%]	42.1241	11.7624	exact	Civitavecchia			Rome	https://www.gem.wiki/Torrevaldaliga_Sud_power_station	L100000400469	G100000400470	FR0010208488	0.5	4380		19	2045	2085	2125	0	0.460441	0	0	0.478243	0	0	0.481739	0	0	0.420835	0
oil/gas	Italy	Europe	Southern Europe	Torrevaldaliga Sud power station	TV4			320	mothballed			GT	NG					Tirreno Power SpA [100.0%]	ENGIE SA [50.0%]; Energia Italiana SpA [50.0%]	42.1241	11.7624	exact	Civitavecchia			Rome	https://www.gem.wiki/Torrevaldaliga_Sud_power_station	L100000400469	G100000409808	FR0010208488	0.5	4380	4380	-99	40	80	120	0	0.460441	0	0	0.478243	0	0	0.481739	0	0	0.420835	0
oil/gas	Mexico	Americas	Latin America and the Caribbean	Tractebel Monterrey power station	1	Central CC Tractebel Monterrey		284	operating	2003		CC	NG					Tractebel Energía De Monterrey S de RL de CV [100%]	ENGIE SA [100.0%]	25.7664	-100.542	exact	García			Nuevo León	https://gem.wiki/Tractebel_Monterrey_power_station	L100000406255	G100000406442	FR0010208488	1	852	852	21	2043	2083	2123	0	0.460441	0	0	0.478243	0	0	0.481739	0	0	0.420835	0
oil/gas	Pakistan	Asia	Southern Asia	Uch power station	1			586	operating	2000		CC	NG/D					UCH Power Ltd [100.0%]	ENGIE SA; Swicorp Co	28.5827	68.1762	exact	Dera Murad Jamali		Nasirabad District	Balochistan	https://www.gem.wiki/Uch_power_station	L100000406037	G100000406123	FR0010208488	0.5	2970		24	2040	2080	2120	0	0.460441	0	0	0.478243	0	0	0.481739	0	0	0.420835	0
oil/gas	Pakistan	Asia	Southern Asia	Uch power station	2			404	operating	2014		CC	NG/D					UCH-II Power Pvt Ltd [100.0%]	ENGIE SA; Swicorp Co	28.5827	68.1762	exact	Dera Murad Jamali		Nasirabad District	Balochistan	https://www.gem.wiki/Uch_power_station	L100000406037	G100000406124	FR0010208488	0.5	2970	2970	10	2054	2094	2134	0	0.460441	0	0	0.478243	0	0	0.481739	0	0	0.420835	0
oil/gas	United Arab Emirates	Asia	Western Asia	Umm Al Nar West and East Integrated Water and power plant	GT01	محطة أم النار الغربية للطاقة	Umm Al Nar East plant/UAN East/Umm Al Nar West cogeneration plant	59	operating	1979		GT	NG/FO					Arabian Power Company PJSC [100.0%]	Arabian United Power Company PJSC [60.0%]; ENGIE SA [20.0%]; Chubu Electric Power Co Inc [10.0%]; Tokyo Electric Power Co [10.0%]	24.4348	54.4876	exact	Abu Dhabi			Abu Dhabi	https://www.gem.wiki/Umm_Al_Nar_West_and_East_Integrated_Water_and_power_plant	L100000405598	G100000405072	FR0010208488	0.2	9234		45	2019	2059	2099	0	0.460441	0	0	0.478243	0	0	0.481739	0	0	0.420835	0
oil/gas	United Arab Emirates	Asia	Western Asia	Umm Al Nar West and East Integrated Water and power plant	GT02	محطة أم النار الغربية للطاقة	Umm Al Nar East plant/UAN East/Umm Al Nar West cogeneration plant	59	operating	1979		GT	NG/FO					Arabian Power Company PJSC [100.0%]	Arabian United Power Company PJSC [60.0%]; ENGIE SA [20.0%]; Chubu Electric Power Co Inc [10.0%]; Tokyo Electric Power Co [10.0%]	24.4348	54.4876	exact	Abu Dhabi			Abu Dhabi	https://www.gem.wiki/Umm_Al_Nar_West_and_East_Integrated_Water_and_power_plant	L100000405598	G100000405073	FR0010208488	0.2	9234		45	2019	2059	2099	0	0.460441	0	0	0.478243	0	0	0.481739	0	0	0.420835	0
oil/gas	United Arab Emirates	Asia	Western Asia	Umm Al Nar West and East Integrated Water and power plant	ST1	محطة أم النار الغربية للطاقة	Umm Al Nar East plant/UAN East/Umm Al Nar West cogeneration plant	60	operating	1981		ST	NG/FO					Arabian Power Company PJSC [100.0%]	Arabian United Power Company PJSC [60.0%]; ENGIE SA [20.0%]; Chubu Electric Power Co Inc [10.0%]; Tokyo Electric Power Co [10.0%]	24.4348	54.4876	exact	Abu Dhabi			Abu Dhabi	https://www.gem.wiki/Umm_Al_Nar_West_and_East_Integrated_Water_and_power_plant	L100000405598	G100000405064	FR0010208488	0.2	9234		43	2021	2061	2101	0	0.460441	0	0	0.478243	0	0	0.481739	0	0	0.420835	0
oil/gas	United Arab Emirates	Asia	Western Asia	Umm Al Nar West and East Integrated Water and power plant	ST2	محطة أم النار الغربية للطاقة	Umm Al Nar East plant/UAN East/Umm Al Nar West cogeneration plant	60	operating	1981		ST	NG/FO					Arabian Power Company PJSC [100.0%]	Arabian United Power Company PJSC [60.0%]; ENGIE SA [20.0%]; Chubu Electric Power Co Inc [10.0%]; Tokyo Electric Power Co [10.0%]	24.4348	54.4876	exact	Abu Dhabi			Abu Dhabi	https://www.gem.wiki/Umm_Al_Nar_West_and_East_Integrated_Water_and_power_plant	L100000405598	G100000405065	FR0010208488	0.2	9234		43	2021	2061	2101	0	0.460441	0	0	0.478243	0	0	0.481739	0	0	0.420835	0
oil/gas	United Arab Emirates	Asia	Western Asia	Umm Al Nar West and East Integrated Water and power plant	ST3	محطة أم النار الغربية للطاقة	Umm Al Nar East plant/UAN East/Umm Al Nar West cogeneration plant	60	operating	1981		ST	NG/FO					Arabian Power Company PJSC [100.0%]	Arabian United Power Company PJSC [60.0%]; ENGIE SA [20.0%]; Chubu Electric Power Co Inc [10.0%]; Tokyo Electric Power Co [10.0%]	24.4348	54.4876	exact	Abu Dhabi			Abu Dhabi	https://www.gem.wiki/Umm_Al_Nar_West_and_East_Integrated_Water_and_power_plant	L100000405598	G100000405066	FR0010208488	0.2	9234		43	2021	2061	2101	0	0.460441	0	0	0.478243	0	0	0.481739	0	0	0.420835	0
oil/gas	United Arab Emirates	Asia	Western Asia	Umm Al Nar West and East Integrated Water and power plant	ST4	محطة أم النار الغربية للطاقة	Umm Al Nar East plant/UAN East/Umm Al Nar West cogeneration plant	60	operating	1981		ST	NG/FO					Arabian Power Company PJSC [100.0%]	Arabian United Power Company PJSC [60.0%]; ENGIE SA [20.0%]; Chubu Electric Power Co Inc [10.0%]; Tokyo Electric Power Co [10.0%]	24.4348	54.4876	exact	Abu Dhabi			Abu Dhabi	https://www.gem.wiki/Umm_Al_Nar_West_and_East_Integrated_Water_and_power_plant	L100000405598	G100000405067	FR0010208488	0.2	9234		43	2021	2061	2101	0	0.460441	0	0	0.478243	0	0	0.481739	0	0	0.420835	0
oil/gas	United Arab Emirates	Asia	Western Asia	Umm Al Nar West and East Integrated Water and power plant	ST5	محطة أم النار الغربية للطاقة	Umm Al Nar East plant/UAN East/Umm Al Nar West cogeneration plant	60	operating	1981		ST	NG/FO					Arabian Power Company PJSC [100.0%]	Arabian United Power Company PJSC [60.0%]; ENGIE SA [20.0%]; Chubu Electric Power Co Inc [10.0%]; Tokyo Electric Power Co [10.0%]	24.4348	54.4876	exact	Abu Dhabi			Abu Dhabi	https://www.gem.wiki/Umm_Al_Nar_West_and_East_Integrated_Water_and_power_plant	L100000405598	G100000405068	FR0010208488	0.2	9234		43	2021	2061	2101	0	0.460441	0	0	0.478243	0	0	0.481739	0	0	0.420835	0
oil/gas	United Arab Emirates	Asia	Western Asia	Umm Al Nar West and East Integrated Water and power plant	ST6	محطة أم النار الغربية للطاقة	Umm Al Nar East plant/UAN East/Umm Al Nar West cogeneration plant	60	operating	1981		ST	NG/FO					Arabian Power Company PJSC [100.0%]	Arabian United Power Company PJSC [60.0%]; ENGIE SA [20.0%]; Chubu Electric Power Co Inc [10.0%]; Tokyo Electric Power Co [10.0%]	24.4348	54.4876	exact	Abu Dhabi			Abu Dhabi	https://www.gem.wiki/Umm_Al_Nar_West_and_East_Integrated_Water_and_power_plant	L100000405598	G100000405069	FR0010208488	0.2	9234		43	2021	2061	2101	0	0.460441	0	0	0.478243	0	0	0.481739	0	0	0.420835	0
oil/gas	United Arab Emirates	Asia	Western Asia	Umm Al Nar West and East Integrated Water and power plant	ST7	محطة أم النار الغربية للطاقة	Umm Al Nar East plant/UAN East/Umm Al Nar West cogeneration plant	150	operating	1998		ST	NG/FO					Arabian Power Company PJSC [100.0%]	Arabian United Power Company PJSC [60.0%]; ENGIE SA [20.0%]; Chubu Electric Power Co Inc [10.0%]; Tokyo Electric Power Co [10.0%]	24.4348	54.4876	exact	Abu Dhabi			Abu Dhabi	https://www.gem.wiki/Umm_Al_Nar_West_and_East_Integrated_Water_and_power_plant	L100000405598	G100000405070	FR0010208488	0.2	9234		26	2038	2078	2118	0	0.460441	0	0	0.478243	0	0	0.481739	0	0	0.420835	0
oil/gas	United Arab Emirates	Asia	Western Asia	Umm Al Nar West and East Integrated Water and power plant	ST8	محطة أم النار الغربية للطاقة	Umm Al Nar East plant/UAN East/Umm Al Nar West cogeneration plant	150	operating	1998		ST	NG/FO					Arabian Power Company PJSC [100.0%]	Arabian United Power Company PJSC [60.0%]; ENGIE SA [20.0%]; Chubu Electric Power Co Inc [10.0%]; Tokyo Electric Power Co [10.0%]	24.4348	54.4876	exact	Abu Dhabi			Abu Dhabi	https://www.gem.wiki/Umm_Al_Nar_West_and_East_Integrated_Water_and_power_plant	L100000405598	G100000405071	FR0010208488	0.2	9234		26	2038	2078	2118	0	0.460441	0	0	0.478243	0	0	0.481739	0	0	0.420835	0
oil/gas	United Arab Emirates	Asia	Western Asia	Umm Al Nar West and East Integrated Water and power plant	CC	محطة أم النار الغربية للطاقة	Umm Al Nar Gas Thermal IWPP Project/New Umm Al Nar plant/UAN (Sas Al Nakhl) cogeneration CCGT/Sas Al Nakheel (SASN) power station	2300	operating	2007	2027	CC	NG					Abu Dhabi National Energy Company PJSC [60.0%]; Engie Energy France [20.0%]; JERA Co Inc [20.0%]	Abu Dhabi National Energy Company PJSC [60.0%]; ENGIE SA [20.0%]; Chubu Electric Power Co Inc [10.0%]; Tokyo Electric Power Co [10.0%]	24.4348	54.4876	exact	Abu Dhabi			Abu Dhabi	https://www.gem.wiki/Umm_Al_Nar_West_and_East_Integrated_Water_and_power_plant	L100000405598	G100000410458	FR0010208488	0.2	9234	9234	17	2047	2087	2127	0	0.460441	0	0	0.478243	0	0	0.481739	0	0	0.420835	0
oil/gas	Saudi Arabia	Asia	Western Asia	Uthmaniyah cogeneration Gas power plant	GT1	محطة توليد العثمانية		155	operating	2006		GT	NG					Tihama Power Generation Co Ltd [100.0%]	ENGIE SA [60.0%]; Saudi Oger Ltd [40.0%]	25.19	49.307	exact	Uthmaniyah			Eastern	https://www.gem.wiki/Uthmaniyah_cogeneration_Gas_power_plant	L100000405566	G100000404980	FR0010208488	0.6	1490.1		18	2046	2086	2126	0	0.460441	0	0	0.478243	0	0	0.481739	0	0	0.420835	0
oil/gas	Saudi Arabia	Asia	Western Asia	Uthmaniyah cogeneration Gas power plant	GT2	محطة توليد العثمانية		155	operating	2006		GT	NG					Tihama Power Generation Co Ltd [100.0%]	ENGIE SA [60.0%]; Saudi Oger Ltd [40.0%]	25.19	49.307	exact	Uthmaniyah			Eastern	https://www.gem.wiki/Uthmaniyah_cogeneration_Gas_power_plant	L100000405566	G100000404981	FR0010208488	0.6	1490.1		18	2046	2086	2126	0	0.460441	0	0	0.478243	0	0	0.481739	0	0	0.420835	0
oil/gas	Saudi Arabia	Asia	Western Asia	Uthmaniyah cogeneration Gas power plant	GT3	محطة توليد العثمانية		186.7	operating	2015		GT	NG					Tihama Power Generation Co Ltd [100.0%]	ENGIE SA [60.0%]; Saudi Oger Ltd [40.0%]	25.19	49.307	exact	Uthmaniyah			Eastern	https://www.gem.wiki/Uthmaniyah_cogeneration_Gas_power_plant	L100000405566	G100000404982	FR0010208488	0.6	1490.1	1490.1	9	2055	2095	2135	0	0.460441	0	0	0.478243	0	0	0.481739	0	0	0.420835	0
oil/gas	Italy	Europe	Southern Europe	Vado Ligure power station	VL5			800	operating	2007		CC	NG					Tirreno Power SpA [100.0%]	ENGIE SA [50.0%]; Energia Italiana SpA [50.0%]	44.2755	8.4305	exact	Vado Ligure			Savona	https://www.gem.wiki/Vado_Ligure_power_station	L100000102858	G100000400475	FR0010208488	0.5	2400	2400	17	2047	2087	2127	0	0.460441	0	0	0.478243	0	0	0.481739	0	0	0.420835	0
oil/gas	Belgium	Europe	Western Europe	Vilvoorde power station	1			255	operating	2001		GT	NG					Electrabel NV/SA [100%]	ENGIE SA [100.0%]	50.9414	4.4246	exact	Vilvoorde			Flemish Brabant	https://www.gem.wiki/Vilvoorde_power_station	L100000400037	G100000400037	FR0010208488	1	3375		23	2041	2081	2121	0	0.460441	0	0	0.478243	0	0	0.481739	0	0	0.420835	0
oil/gas	Belgium	Europe	Western Europe	Vilvoorde power station	2			870	shelved	2025		CC	NG					Electrabel NV/SA [100%]	ENGIE SA [100.0%]	50.9414	4.4246	exact	Vilvoorde			Flemish Brabant	https://www.gem.wiki/Vilvoorde_power_station	L100000400037	G100000406273	FR0010208488	1	3375	3375	-1	2065	2105	2145	0	0.460441	0	0	0.478243	0	0	0.481739	0	0	0.420835	0
oil/gas	France	Europe	Western Europe	Vitry-sur-Seine cogeneration power station	1			125	operating	2001		GT	NG					COGETHERM; Paris Urban Heating Company SA	City of Paris; ENGIE SA; Electricité de France SA	48.7892	2.41731	exact	Vitry-sur-Seine			Val-de-Marne	https://www.gem.wiki/Vitry-sur-Seine_cogeneration_power_station	L100000406385	G100000406298	FR0010208488	0.333333	375	375	23	2041	2081	2121	0	0.460441	0	0	0.478243	0	0	0.481739	0	0	0.420835	0
oil/gas	Italy	Europe	Southern Europe	Voghera power station	1			381	operating	2005		CC	NG					Engie Italia SpA [100.0%]	ENGIE SA [100.0%]	45.0296	8.9723	exact	Voghera			Pavia	https://www.gem.wiki/Voghera_power_station	L100000400478	G100000400478	FR0010208488	1	1143	1143	19	2045	2085	2125	0	0.460441	0	0	0.478243	0	0	0.481739	0	0	0.420835	0
oil/gas	Canada	Americas	Northern America	West Windsor power plant	1			135.4	operating	1996		CC	NG					West Windsor Power [100.0%]	ENGIE SA	42.2807	-83.0876	exact	Windsor			Ontario	https://www.gem.wiki/West_Windsor_power_plant	L100000405257	G100000404228	FR0010208488	1	406.2	406.2	28	2036	2076	2116	0	0.460441	0	0	0.478243	0	0	0.481739	0	0	0.420835	0
oil/gas	Belgium	Europe	Western Europe	Wilmarsdonk Total power station	1			43	operating			GT	NG					Electrabel NV/SA [100%]	ENGIE SA [100.0%]	51.2717	4.3262	exact	Antwerp			Antwerp	https://www.gem.wiki/Wilmarsdonk_Total_power_station	L100000406371	G100000406279	FR0010208488	1	387		-99	40	80	120	0	0.460441	0	0	0.478243	0	0	0.481739	0	0	0.420835	0
oil/gas	Belgium	Europe	Western Europe	Wilmarsdonk Total power station	2			43	operating			GT	NG					Electrabel NV/SA [100%]	ENGIE SA [100.0%]	51.2717	4.3262	exact	Antwerp			Antwerp	https://www.gem.wiki/Wilmarsdonk_Total_power_station	L100000406371	G100000406278	FR0010208488	1	387		-99	40	80	120	0	0.460441	0	0	0.478243	0	0	0.481739	0	0	0.420835	0
oil/gas	Belgium	Europe	Western Europe	Wilmarsdonk Total power station	3			43	operating			GT	NG					Electrabel NV/SA [100%]	ENGIE SA [100.0%]	51.2717	4.3262	exact	Antwerp			Antwerp	https://www.gem.wiki/Wilmarsdonk_Total_power_station	L100000406371	G100000406277	FR0010208488	1	387	387	-99	40	80	120	0	0.460441	0	0	0.478243	0	0	0.481739	0	0	0.420835	0
oil/gas	Belgium	Europe	Western Europe	Zandvliet power station	1			386.2	operating	2005		CC	NG					Zandvliet Power NV [100%]	BASF Antwerpen NV [50.0%]; ENGIE SA [50.0%]	51.3689	4.26419	exact	Antwerp			Antwerp	https://www.gem.wiki/Zandvliet_Power_Station	L100000400038	G100000400038	FR0010208488	0.5	1158.6	1158.6	19	2045	2085	2125	0	0.460441	0	0	0.478243	0	0	0.481739	0	0	0.420835	0
oil/gas	Belgium	Europe	Western Europe	Zeebrugge 2 Fluxys power station	1			40	operating	1987		GT	NG					Electrabel NV/SA [100%]	ENGIE SA [100.0%]	51.3518	3.20869	exact	Bruges			West Flanders	https://www.gem.wiki/Zeebrugge_2_Fluxys_power_station	L100000400039	G100000400039	FR0010208488	1	120	120	37	2027	2067	2107	0	0.460441	0	0	0.478243	0	0	0.481739	0	0	0.420835	0
oil/gas	Belgium	Europe	Western Europe	Zelzate 2 Knippegroen power station	1			315	operating	2010		ST	NG/BFG					Electrabel NV/SA [100%]	ENGIE SA [100.0%]	51.1587	3.8068	exact	Gent			East Flanders	https://www.gem.wiki/Zelzate_2_Knippegroen_power_station	L100000407649	G100000409988	FR0010208488	1	945	945	14	2050	2090	2130	0	0.460441	0	0	0.478243	0	0	0.481739	0	0	0.420835	0
oil/gas	Belgium	Europe	Western Europe	Zwijndrecht Lanxess power station	1			58	operating	2010		CC	NG					Electrabel NV/SA [100%]	ENGIE SA [100.0%]	51.2382	4.3408	exact	Zwijndrecht			Antwerp	https://www.gem.wiki/Zwijndrecht_Lanxess_power_station	L100000400040	G100000400040	FR0010208488	1	174	174	14	2050	2090	2130	0	0.460441	0	0	0.478243	0	0	0.481739	0	0	0.420835	0
Type	Country/area	Region	Subregion	Plant / Project name	Unit / Phase name	Plant / Project name (local)	Plant / Project name (other)	Capacity (MW)	Status	Start year	Retired year	Technology	Fuel	Country/area 1 (hydropower only)	Country/area 2 (hydropower only)	Country/area 1 Capacity (MW) (hydropower only)	Country/area 2 Capacity (MW) (hydropower only)	Owner	Parent	Latitude	Longitude	Location accuracy	City	Local area (taluk, county)	Major area (prefecture, district)	Subnational unit (state, province)	GEM.Wiki URL	GEM location ID	GEM unit/phase ID	CompISIN	Ownership	Plant capacity	Plant capacity	Age	Reinvestment year	Reinvestment year	Reinvestment year	2020	2021	2022	2023	2024	2025	2026	2027	2028	2029	2030	2031
coal	Chile	Americas	Latin America and the Caribbean	Andina-Hornitos power station	Unit 1	Termoeléctrica Andina-Hornitos	Andina power station (Unit 1), Central Termoeléctrica Andina (CTA) (Unit 1), Central Termoeléctrica Hornitos (CTH) (Unit 2), Hornitos power station (Unit 2)	177	operating	2011	2025	CFB	bituminous					ENGIE Energía Chile [100%]	ENGIE Energía Chile [100.0%]	-23.0877	-70.4075	exact	Mejillones			Antofagasta Region	https://www.gem.wiki/Andina-Hornitos_power_station	L100000100181	G100000100194	FR0010208488	1	1065		13	2051	2091	2131	686976	1.24404e+06	936891	716328	896058	896058	896058	896058	896058	896058	896058	896058
coal	Chile	Americas	Latin America and the Caribbean	Andina-Hornitos power station	Unit 2	Termoeléctrica Andina-Hornitos	Andina power station (Unit 1), Central Termoeléctrica Andina (CTA) (Unit 1), Central Termoeléctrica Hornitos (CTH) (Unit 2), Hornitos power station (Unit 2)	178	operating	2012	2025	CFB	bituminous					ENGIE Energía Chile [100%]	ENGIE Energía Chile [100.0%]	-23.0877	-70.4075	exact	Mejillones			Antofagasta Region	https://www.gem.wiki/Andina-Hornitos_power_station	L100000100181	G100000100195	FR0010208488	1	1065	1065	12	2052	2092	2132	690857	1.25107e+06	942184	720375	901121	901121	901121	901121	901121	901121	901121	901121
coal	France	Europe	Western Europe	Goro power station	Unit 1			50	operating	2008	2025	subcritical	unknown					Prony Énergies [100%]	ENERCAL SA [75.0%]; ENGIE SA [25.0%]	-22.3302	166.912	exact	Goro	Le Mont-Dore Municipality	Sud	New Caledonia	https://www.gem.wiki/Goro_power_station	L100000104548	G100000114107	FR0010208488	0.25	300		16	2048	2088	2128	50156.3	90827.7	68402.7	52299.4	65421.5	65421.5	65421.5	65421.5	65421.5	65421.5	65421.5	65421.5
coal	France	Europe	Western Europe	Goro power station	Unit 2			50	operating	2008	2025	subcritical	unknown					Prony Énergies [100%]	ENERCAL SA [75.0%]; ENGIE SA [25.0%]	-22.3302	166.912	exact	Goro	Le Mont-Dore Municipality	Sud	New Caledonia	https://www.gem.wiki/Goro_power_station	L100000104548	G100000114108	FR0010208488	0.25	300	300	16	2048	2088	2128	50156.3	90827.7	68402.7	52299.4	65421.5	65421.5	65421.5	65421.5	65421.5	65421.5	65421.5	65421.5
coal	Peru	Americas	Latin America and the Caribbean	Ilo power station	Unit 1	Central Termoeléctrica de Ilo	Ilo 21	135	retired	1999	2022	subcritical	bituminous					ENGIE Energía Perú [100%]	ENGIE Energía Perú [100.0%]	-17.776	-71.1893	exact	Ilo	Pacocha	Ilo	Moquegua	https://www.gem.wiki/Ilo_power_station	L100000103158	G100000104832	FR0010208488	1	4275	4275	25	2039	2079	2119	523965	948843	0	0	0	0	0	0	0	0	0	0
coal	Chile	Americas	Latin America and the Caribbean	Mejillones power station	Unit 1	Termoeléctrica Mejillones	Infraestructura Energética de Mejillones, IEM1 (Unit 4), IEM2 (Unit 5), Red Dragon (Unit 4, Unit 5)	160	operating	1996	2024	subcritical	bituminous					ENGIE Energía Chile [100%]	ENGIE Energía Chile [100.0%]	-23.0892	-70.4103	exact	Mejillones		Antofagasta	Antofagasta Region	https://www.gem.wiki/Mejillones_power_station	L100000100184	G100000106831	FR0010208488	1	3987		28	2036	2076	2116	620995	1.12455e+06	846907	647528	809996	809996	809996	809996	809996	809996	809996	809996
coal	Chile	Americas	Latin America and the Caribbean	Mejillones power station	Unit 2	Termoeléctrica Mejillones	Infraestructura Energética de Mejillones, IEM1 (Unit 4), IEM2 (Unit 5), Red Dragon (Unit 4, Unit 5)	174	operating	1998	2024	subcritical	bituminous					ENGIE Energía Chile [100%]	ENGIE Energía Chile [100.0%]	-23.0892	-70.4103	exact	Mejillones		Antofagasta	Antofagasta Region	https://www.gem.wiki/Mejillones_power_station	L100000100184	G100000106832	FR0010208488	1	3987		26	2038	2078	2118	675332	1.22295e+06	921012	704187	880871	880871	880871	880871	880871	880871	880871	880871
coal	Chile	Americas	Latin America and the Caribbean	Mejillones power station	Unit 4	Termoeléctrica Mejillones	Infraestructura Energética de Mejillones, IEM1 (Unit 4), IEM2 (Unit 5), Red Dragon (Unit 4, Unit 5)	375	operating	2019	2025	subcritical	bituminous					ENGIE Energía Chile [100%]	ENGIE Energía Chile [100.0%]	-23.0892	-70.4103	exact	Mejillones		Antofagasta	Antofagasta Region	https://www.gem.wiki/Mejillones_power_station	L100000100184	G100000106833	FR0010208488	1	3987	3987	5	2059	2099	2139	1.45546e+06	2.63568e+06	1.98494e+06	1.51764e+06	1.89843e+06	1.89843e+06	1.89843e+06	1.89843e+06	1.89843e+06	1.89843e+06	1.89843e+06	1.89843e+06
coal	Portugal	Europe	Southern Europe	Pego power station	Unit 1			341	retired	1992	2021	subcritical	bituminous					Tejo Energia [100%]	Endesa SA [43.8%]; ENGIE SA [28.1%]; Marubeni Corp [28.1%]	39.4682	-8.10923	exact	Pego	Abrantes	Médio Tejo	Santarém	https://www.gem.wiki/Pego_power_station	L100000103283	G100000107913	FR0010208488	0.281	2046		32	2032	2072	2112	371902	0	0	0	0	0	0	0	0	0	0	0
coal	Portugal	Europe	Southern Europe	Pego power station	Unit 2			341	retired	1995	2021	subcritical	bituminous					Tejo Energia [100%]	Endesa SA [43.8%]; ENGIE SA [28.1%]; Marubeni Corp [28.1%]	39.4682	-8.10923	exact	Pego	Abrantes	Médio Tejo	Santarém	https://www.gem.wiki/Pego_power_station	L100000103283	G100000107914	FR0010208488	0.281	2046	2046	29	2035	2075	2115	371902	0	0	0	0	0	0	0	0	0	0	0
coal	Morocco	Africa	Northern Africa	Safi power station	Unit 1			693	operating	2018		ultra-supercritical	unknown					Safi Energy Company [100%]	ENGIE SA [35.0%]; Nareva Holding SA [35.0%]; Mitsui & Co Ltd [30.0%]	32.1491	-9.28229	exact	Cap Ghir Safi			Souss-Massa	https://www.gem.wiki/Safi_power_station	L100000103053	G100000108700	FR0010208488	0.35	4158		6	2058	2098	2138	973234	1.76242e+06	1.32729e+06	1.01482e+06	1.26944e+06	1.26944e+06	1.26944e+06	1.26944e+06	1.26944e+06	1.26944e+06	1.26944e+06	1.26944e+06
coal	Morocco	Africa	Northern Africa	Safi power station	Unit 2			693	operating	2018		ultra-supercritical	unknown					Safi Energy Company [100%]	ENGIE SA [35.0%]; Nareva Holding SA [35.0%]; Mitsui & Co Ltd [30.0%]	32.1491	-9.28229	exact	Cap Ghir Safi			Souss-Massa	https://www.gem.wiki/Safi_power_station	L100000103053	G100000108701	FR0010208488	0.35	4158	4158	6	2058	2098	2138	973234	1.76242e+06	1.32729e+06	1.01482e+06	1.26944e+06	1.26944e+06	1.26944e+06	1.26944e+06	1.26944e+06	1.26944e+06	1.26944e+06	1.26944e+06
coal	Chile	Americas	Latin America and the Caribbean	Tocopilla power station	Unit 14	Termoeléctrica Tocopilla		136	retired	1987	2022	subcritical	subbituminous					ENGIE Energía Chile [100%]	ENGIE Energía Chile [100.0%]	-22.0964	-70.2118	exact	Tocopilla		Tocopilla	Antofagasta Region	https://www.gem.wiki/Tocopilla_power_station	L100000100186	G100000110211	FR0010208488	1	1986		37	2027	2067	2107	536215	971028	0	0	0	0	0	0	0	0	0	0
coal	Chile	Americas	Latin America and the Caribbean	Tocopilla power station	Unit 15	Termoeléctrica Tocopilla		132	retired	1990	2022	subcritical	subbituminous					ENGIE Energía Chile [100%]	ENGIE Energía Chile [100.0%]	-22.0964	-70.2118	exact	Tocopilla		Tocopilla	Antofagasta Region	https://www.gem.wiki/Tocopilla_power_station	L100000100186	G100000110212	FR0010208488	1	1986	1986	34	2030	2070	2110	520444	942469	0	0	0	0	0	0	0	0	0	0
oil/gas	Belgium	Europe	Western Europe	Aalst Syral power station	1			48	operating	2000		CC	NG					Electrabel NV/SA [100%]	ENGIE SA [100.0%]	50.9355	4.04516	exact	Aalst			East Flanders	https://www.gem.wiki/Aalst_Syral_power_station	L100000400016	G100000400016	FR0010208488	1	144	144	24	2040	2080	2120	95097.7	98774.5	99496.6	86917.7	95071.6	95071.6	95071.6	95071.6	95071.6	95071.6	95071.6	95071.6
oil/gas	Bahrain	Asia	Western Asia	Al Ezzel power station	CC1	محطة العزل لإنتاج الكهرباء	El Ezzel CCGT Power Plant Bahrain	471	operating	2007		CC	NG					Al Ezzel Power Company BSC [100.0%]	ENGIE SA [45.0%]; Gulf Investment Corp [45.0%]; Social Insurance Organization (Bahrain)	26.2175	50.6595	exact	Al Hidd			Muharraq	https://www.gem.wiki/Al_Ezzel_power_station	L100000405455	G100000404587	FR0010208488	0.45	2826		17	2047	2087	2127	419916	436151	439340	383796	419801	419801	419801	419801	419801	419801	419801	419801
oil/gas	Bahrain	Asia	Western Asia	Al Ezzel power station	CC2	محطة العزل لإنتاج الكهرباء	El Ezzel CCGT Power Plant Bahrain	471	operating	2007		CC	NG					Al Ezzel Power Company BSC [100.0%]	ENGIE SA [45.0%]; Gulf Investment Corp [45.0%]; Social Insurance Organization (Bahrain)	26.2175	50.6595	exact	Al Hidd			Muharraq	https://www.gem.wiki/Al_Ezzel_power_station	L100000405455	G100000404588	FR0010208488	0.45	2826	2826	17	2047	2087	2127	419916	436151	439340	383796	419801	419801	419801	419801	419801	419801	419801	419801
oil/gas	Bahrain	Asia	Western Asia	Al Hidd Power and Water Station	1	محطة الحد لإنتاج الكهرباء	Al Hidd power plant/Al-Hidd IWPP	987	operating	2003		CC	NG					Hidd Power Company BSC [100.0%]	Malakoff Corporation Bhd [40.0%]; ENGIE SA [30.0%]; Sumitomo Corp [30.0%]	26.2223	50.6621	exact	Al Hidd			Muharraq	https://www.gem.wiki/Al_Hidd_Power_and_Water_Station	L100000405457	G100000404589	FR0010208488	0.3	2961	2961	21	2043	2083	2123	586634	609315	613769	536174	586473	586473	586473	586473	586473	586473	586473	586473
oil/gas	Belgium	Europe	Western Europe	Amercoeur power station	1			451	operating	2010		CC	NG					Electrabel NV/SA [100%]	ENGIE SA [100.0%]	50.4304	4.3955	exact	Roux			Hainaut	https://www.gem.wiki/Amercoeur_power_station	L100000100087	G100000400017	FR0010208488	1	2313		14	2050	2090	2130	893522	928069	934853	816664	893277	893277	893277	893277	893277	893277	893277	893277
oil/gas	Belgium	Europe	Western Europe	Amercoeur power station	2			320	shelved	2025		GT	NG					Electrabel NV/SA [100%]	ENGIE SA [100.0%]	50.4304	4.3955	exact	Roux			Hainaut	https://www.gem.wiki/Amercoeur_power_station	L100000100087	G100000406282	FR0010208488	1	2313	2313	-1	2065	2105	2145	0	0	0	0	0	0	0	0	0	0	0	0
oil/gas	Italy	Europe	Southern Europe	Arkema Marghera power station	1			20	operating	2013		ST	NG					Engie Servizi SpA [100.0%]	ENGIE SA [100.0%]	45.4502	12.2259	exact	Porto Marghera			Venice	https://www.gem.wiki/Arkema_Marghera_power_station	L100000400343	G100000400343	FR0010208488	1	60	60	11	2053	2093	2133	39624	41156.1	41456.9	36215.7	39613.2	39613.2	39613.2	39613.2	39613.2	39613.2	39613.2	39613.2
oil/gas	United States	Americas	Northern America	Astoria Energy II power station	CC1			650	operating	2011		CC	NG/FO					Astoria Energy II LLC [100.0%]	Algemene Pensioen Groep NV; Bank HaPoalim; Clal Insurance Enterprises Holdings Ltd; ENGIE SA; Harbert-managed funds; IDB Development Group; Munich RE Co; SNC-Lavalin; other	40.7813	-73.8966	exact	Astoria	Queens		New York	https://www.gem.wiki/Astoria_Energy_II_power_station	L100000401729	G100000402047	FR0010208488	0.111111	1950	1950	13	2051	2091	2131	143087	148619	149705	130779	143048	143048	143048	143048	143048	143048	143048	143048
oil/gas	South Africa	Africa	Sub-Saharan Africa	Avon power station	1			167.5	operating	2016		GT	NG/D					Avon Peaking Power (RF) Pty Ltd [100.0%]	ENGIE SA [38.0%]; Legend Power Solutions Pty Ltd [27.0%]; Mitsui & Co Ltd [25.0%]; The Peaker Trust [10.0%]	-29.4189	31.1577	exact	Ballito			KwaZulu-Natal	https://www.gem.wiki/Avon_power_station	L100000407110	G100000408559	FR0010208488	0.38	2010		8	2056	2096	2136	126104	130979	131937	115257	126069	126069	126069	126069	126069	126069	126069	126069
oil/gas	South Africa	Africa	Sub-Saharan Africa	Avon power station	2			167.5	operating	2016		GT	NG/D					Avon Peaking Power (RF) Pty Ltd [100.0%]	ENGIE SA [38.0%]; Legend Power Solutions Pty Ltd [27.0%]; Mitsui & Co Ltd [25.0%]; The Peaker Trust [10.0%]	-29.4189	31.1577	exact	Ballito			KwaZulu-Natal	https://www.gem.wiki/Avon_power_station	L100000407110	G100000414451	FR0010208488	0.38	2010		8	2056	2096	2136	126104	130979	131937	115257	126069	126069	126069	126069	126069	126069	126069	126069
oil/gas	South Africa	Africa	Sub-Saharan Africa	Avon power station	3			167.5	operating	2016		GT	NG/D					Avon Peaking Power (RF) Pty Ltd [100.0%]	ENGIE SA [38.0%]; Legend Power Solutions Pty Ltd [27.0%]; Mitsui & Co Ltd [25.0%]; The Peaker Trust [10.0%]	-29.4189	31.1577	exact	Ballito			KwaZulu-Natal	https://www.gem.wiki/Avon_power_station	L100000407110	G100000414450	FR0010208488	0.38	2010		8	2056	2096	2136	126104	130979	131937	115257	126069	126069	126069	126069	126069	126069	126069	126069
oil/gas	South Africa	Africa	Sub-Saharan Africa	Avon power station	4			167.5	operating	2016		GT	NG/D					Avon Peaking Power (RF) Pty Ltd [100.0%]	ENGIE SA [38.0%]; Legend Power Solutions Pty Ltd [27.0%]; Mitsui & Co Ltd [25.0%]; The Peaker Trust [10.0%]	-29.4189	31.1577	exact	Ballito			KwaZulu-Natal	https://www.gem.wiki/Avon_power_station	L100000407110	G100000414449	FR0010208488	0.38	2010	2010	8	2056	2096	2136	126104	130979	131937	115257	126069	126069	126069	126069	126069	126069	126069	126069
oil/gas	Germany	Europe	Western Europe	Barmen power station	GT1		Wuppertal-Barmen	34	mothballed	1978		GT	NG/HFO					WSW Energie & Wasser AG [100.0%]	WSW Wuppertaler Stadtwerke GmbH [66.9%]; ENGIE SA [33.1%]	51.2689	7.2003	exact	Wuppertal			Nordrhein-Westfalen	https://www.gem.wiki/Barmen_power_station	L100000400114	G100000412908	FR0010208488	0.331	468		46	2018	2058	2098	0	0	0	0	0	0	0	0	0	0	0	0
oil/gas	Germany	Europe	Western Europe	Barmen power station	GT2		Wuppertal-Barmen	34	mothballed	1978		GT	NG/HFO					WSW Energie & Wasser AG [100.0%]	WSW Wuppertaler Stadtwerke GmbH [66.9%]; ENGIE SA [33.1%]	51.2689	7.2003	exact	Wuppertal			Nordrhein-Westfalen	https://www.gem.wiki/Barmen_power_station	L100000400114	G100000412907	FR0010208488	0.331	468		46	2018	2058	2098	0	0	0	0	0	0	0	0	0	0	0	0
oil/gas	Germany	Europe	Western Europe	Barmen power station	CC1		Wuppertal-Barmen	88	operating	2005		CC	NG					WSW Energie & Wasser AG [100.0%]	WSW Wuppertaler Stadtwerke GmbH [66.9%]; ENGIE SA [33.1%]	51.2689	7.2003	exact	Wuppertal			Nordrhein-Westfalen	https://www.gem.wiki/Barmen_power_station	L100000400114	G100000400114	FR0010208488	0.331	468	468	19	2045	2085	2125	57708.5	59939.7	60377.8	52744.6	57692.6	57692.6	57692.6	57692.6	57692.6	57692.6	57692.6	57692.6
oil/gas	Belgium	Europe	Western Europe	Beerse power station	IC			33	operating			ICCC	HFO					Electrabel NV/SA	ENGIE SA	51.3261	4.853	exact					https://www.gem.wiki/Beerse_power_station	L100001000036	G100001000101	FR0010208488	1	99	99	-99	40	80	120	26200.5	50477.5	61715.2	41416.4	42143	42143	42143	42143	42143	42143	42143	42143
oil/gas	Netherlands	Europe	Western Europe	Bergum power station	10GT			72	operating	2019		GT	NG					Engie Energie Nederland NV [100%]	ENGIE SA [100.0%]	53.2097	6.02959	exact	Bergum			Friesland	https://www.gem.wiki/Bergum_power_station	L100000400499	G100000409942	FR0010208488	1	2424		5	2059	2099	2139	142647	148162	149245	130377	142607	142607	142607	142607	142607	142607	142607	142607
oil/gas	Netherlands	Europe	Western Europe	Bergum power station	20GT			72	operating	2019		GT	NG					Engie Energie Nederland NV [100%]	ENGIE SA [100.0%]	53.2097	6.02959	exact	Bergum			Friesland	https://www.gem.wiki/Bergum_power_station	L100000400499	G100000409941	FR0010208488	1	2424		5	2059	2099	2139	142647	148162	149245	130377	142607	142607	142607	142607	142607	142607	142607	142607
oil/gas	Netherlands	Europe	Western Europe	Bergum power station	10			332	mothballed			CC	NG					Engie Energie Nederland NV [100%]	ENGIE SA [100.0%]	53.2097	6.02959	exact	Bergum			Friesland	https://www.gem.wiki/Bergum_power_station	L100000400499	G100000400499	FR0010208488	1	2424		-99	40	80	120	0	0	0	0	0	0	0	0	0	0	0	0
oil/gas	Netherlands	Europe	Western Europe	Bergum power station	20			332	mothballed			CC	NG					Engie Energie Nederland NV [100%]	ENGIE SA [100.0%]	53.2097	6.02959	exact	Bergum			Friesland	https://www.gem.wiki/Bergum_power_station	L100000400499	G100000400500	FR0010208488	1	2424	2424	-99	40	80	120	0	0	0	0	0	0	0	0	0	0	0	0
oil/gas	Belgium	Europe	Western Europe	Beveren Ineos Phenolchemie power station	1			23.8	operating	1993		GT	NG					Electrabel NV/SA [100%]	ENGIE SA [100.0%]	51.2909	4.27025	exact	Beveren			East Flanders	https://www.gem.wiki/Beveren_Ineos_Phenolchemie_power_station	L100000400023	G100000400023	FR0010208488	1	71.4	71.4	31	2033	2073	2113	47152.6	48975.7	49333.7	43096.7	47139.7	47139.7	47139.7	47139.7	47139.7	47139.7	47139.7	47139.7
oil/gas	Italy	Europe	Southern Europe	Boffalora power station	1			88	operating	1988		CC	NG					Engie Servizi SpA [100.0%]	ENGIE SA [100.0%]	45.456	8.79646	approximate	Boffalora Sopra Ticino			Milan	https://www.gem.wiki/Boffalora_power_station	L100000400352	G100000400352	FR0010208488	1	264	264	36	2028	2068	2108	174346	181087	182410	159349	174298	174298	174298	174298	174298	174298	174298	174298
oil/gas	United States	Americas	Northern America	Calumet Energy Team power station	CT11			156	operating	2002		GT	NG					Engie North America [100.0%]	ENGIE SA [100.0%]	41.6835	-87.5563	exact	Chicago	Cook		Illinois	https://www.gem.wiki/Calumet_Energy_Team_power_station	L100000401565	G100000402272	FR0010208488	1	936		22	2042	2082	2122	309068	321017	323364	282483	308983	308983	308983	308983	308983	308983	308983	308983
oil/gas	United States	Americas	Northern America	Calumet Energy Team power station	CT12			156	operating	2002		GT	NG					Engie North America [100.0%]	ENGIE SA [100.0%]	41.6835	-87.5563	exact	Chicago	Cook		Illinois	https://www.gem.wiki/Calumet_Energy_Team_power_station	L100000401565	G100000402273	FR0010208488	1	936	936	22	2042	2082	2122	309068	321017	323364	282483	308983	308983	308983	308983	308983	308983	308983	308983
oil/gas	Italy	Europe	Southern Europe	Castelmassa power station	1			54	operating	1994		CC	NG					Engie Servizi SpA [100.0%]	ENGIE SA [100.0%]	45.0213	11.3116	exact	Castelmassa			Rovigo	https://www.gem.wiki/Castelmassa_power_station	L100000400364	G100000400364	FR0010208488	1	162	162	30	2034	2074	2114	106985	111121	111934	97782.4	106956	106956	106956	106956	106956	106956	106956	106956
oil/gas	Peru	Americas	Latin America and the Caribbean	Chilca power station	1	Central Termoeléctrica Chilca		852	operating	2012		CC	NG					ENGIE Energía Perú SA [100%]	ENGIE Energía Perú SA [100.0%]	-12.5024	-76.729	exact	Chilca		Cañete	Lima	https://gem.wiki/Chilca_power_station	L100000406603	G100000406665	FR0010208488	1	2889		12	2052	2092	2132	1.68798e+06	1.75325e+06	1.76606e+06	1.54279e+06	1.68752e+06	1.68752e+06	1.68752e+06	1.68752e+06	1.68752e+06	1.68752e+06	1.68752e+06	1.68752e+06
oil/gas	Peru	Americas	Latin America and the Caribbean	Chilca power station	2	Central Termoeléctrica Chilca		111	operating	2016		CC	NG					ENGIE Energía Perú SA [100%]	ENGIE Energía Perú SA [100.0%]	-12.5024	-76.729	exact	Chilca		Cañete	Lima	https://gem.wiki/Chilca_power_station	L100000406603	G100000406666	FR0010208488	1	2889	2889	8	2056	2096	2136	219913	228416	230086	200997	219853	219853	219853	219853	219853	219853	219853	219853
oil/gas	France	Europe	Western Europe	Combigolfe power station	1	GRACIT01 - GROUPE 01 DE LA CENTRALE THERMIQUE DE GRACIEUSE (LA)		425	operating	2010		CC	NG					Engie Energy France [100.0%]	ENGIE SA [100.0%]	43.4072	4.8676	exact	Fos-sur-Mer			Bouches-du-Rhone	https://www.gem.wiki/Combigolfe_power_station	L100000400093	G100000400093	FR0010208488	1	1275	1275	14	2050	2090	2130	842011	874566	880959	769584	841780	841780	841780	841780	841780	841780	841780	841780
oil/gas	Belgium	Europe	Western Europe	Covestro Oorderen power station	1		Antwerp Bayer/Oorderen Bayer	43	operating			GT	NG					Electrabel NV/SA [100%]	ENGIE SA [100.0%]	51.297	4.31907	approximate	Antwerp			Antwerp	https://www.gem.wiki/Covestro_Oorderen_power_station	L100000406369	G100000406275	FR0010208488	1	129	129	-99	40	80	120	85191.7	88485.5	89132.3	77863.8	85168.3	85168.3	85168.3	85168.3	85168.3	85168.3	85168.3	85168.3
oil/gas	France	Europe	Western Europe	Cycofos power station	1			428	operating	2009		CC	NG					CyCoFos [100.0%]	ENGIE SA [100.0%]	43.428	4.88652	exact	Fos-sur-Mer			Bouches-du-Rhone	https://www.gem.wiki/Cycofos_power_station	L100000400095	G100000400095	FR0010208488	1	1284	1284	15	2049	2089	2129	847955	880740	887178	775016	847722	847722	847722	847722	847722	847722	847722	847722
oil/gas	South Africa	Africa	Sub-Saharan Africa	Dedisa power station	1			335	operating	2015		CC	NG/D					Dedisa Peaking Power (RF) Pty Ltd [100.0%]	ENGIE SA [38.0%]; Legend Power Solutions Pty Ltd [27.0%]; Mitsui & Co Ltd [25.0%]; The Peaker Trust [10.0%]	-33.7434	25.6728	exact	Gqeberha			Eastern Cape	https://www.gem.wiki/Dedisa_power_station	L100000407109	G100000408558	FR0010208488	0.38	1005	1005	9	2055	2095	2135	252207	261958	263873	230513	252138	252138	252138	252138	252138	252138	252138	252138
oil/gas	Belgium	Europe	Western Europe	Drogenbos power station	1			460	operating	1993		CC	NG					Electrabel NV/SA [100%]	ENGIE SA [100.0%]	50.8023	4.299	exact	Drogenbos			Flemish Brabant	https://www.gem.wiki/Drogenbos_power_station	L100000400024	G100000400024	FR0010208488	1	1716		31	2033	2073	2113	911353	946589	953509	832962	911103	911103	911103	911103	911103	911103	911103	911103
oil/gas	Belgium	Europe	Western Europe	Drogenbos power station	ST			112	mothballed	1999		ST	HFO					Electrabel NV/SA [100%]	ENGIE SA [100.0%]	50.8023	4.299	exact	Drogenbos			Flemish Brabant	https://www.gem.wiki/Drogenbos_power_station	L100000400024	G100001000100	FR0010208488	1	1716	1716	25	2039	2079	2119	0	0	0	0	0	0	0	0	0	0	0	0
oil/gas	Australia	Oceania	Australia and New Zealand	Dry Creek GT power station	1			52	operating	1973	2030	GT	NG					Synergen Power Pty Ltd [100.0%]	ENGIE SA [72.0%]; Mitsui & Co Ltd [28.0%]	-34.8475	138.577	exact	Adelaide			South Australia	https://www.gem.wiki/Dry_Creek_GT_power_station	L100000405112	G100000401509	FR0010208488	0.72	468		51	2013	2053	2093	74176.2	77044.1	77607.3	67795.8	74155.9	74155.9	74155.9	74155.9	74155.9	74155.9	74155.9	74155.9
oil/gas	Australia	Oceania	Australia and New Zealand	Dry Creek GT power station	2			52	operating	1973	2030	GT	NG					Synergen Power Pty Ltd [100.0%]	ENGIE SA [72.0%]; Mitsui & Co Ltd [28.0%]	-34.8475	138.577	exact	Adelaide			South Australia	https://www.gem.wiki/Dry_Creek_GT_power_station	L100000405112	G100000401510	FR0010208488	0.72	468		51	2013	2053	2093	74176.2	77044.1	77607.3	67795.8	74155.9	74155.9	74155.9	74155.9	74155.9	74155.9	74155.9	74155.9
oil/gas	Australia	Oceania	Australia and New Zealand	Dry Creek GT power station	3			52	operating	1973	2030	GT	NG					Synergen Power Pty Ltd [100.0%]	ENGIE SA [72.0%]; Mitsui & Co Ltd [28.0%]	-34.8475	138.577	exact	Adelaide			South Australia	https://www.gem.wiki/Dry_Creek_GT_power_station	L100000405112	G100000401511	FR0010208488	0.72	468	468	51	2013	2053	2093	74176.2	77044.1	77607.3	67795.8	74155.9	74155.9	74155.9	74155.9	74155.9	74155.9	74155.9	74155.9
oil/gas	Netherlands	Europe	Western Europe	EEM power station	EC20	Eemscentrale		131	operating	1987		GT	NG					Engie Energie Nederland NV [100%]	ENGIE SA [100.0%]	53.4417	6.85605	exact	Eemshaven			Groningen	https://www.gem.wiki/EEM_power_station	L100000400513	G100000409939	FR0010208488	1	5793		37	2027	2067	2107	259537	269572	271543	237213	259466	259466	259466	259466	259466	259466	259466	259466
oil/gas	Netherlands	Europe	Western Europe	EEM power station	EC3	Eemscentrale		360	operating	1995		CC	NG					Engie Energie Nederland NV [100%]	ENGIE SA [100.0%]	53.4417	6.85605	exact	Eemshaven			Groningen	https://www.gem.wiki/EEM_power_station	L100000400513	G100000400513	FR0010208488	1	5793		29	2035	2075	2115	713233	740809	746224	651883	713037	713037	713037	713037	713037	713037	713037	713037
oil/gas	Netherlands	Europe	Western Europe	EEM power station	EC4	Eemscentrale		360	operating	1995		CC	NG					Engie Energie Nederland NV [100%]	ENGIE SA [100.0%]	53.4417	6.85605	exact	Eemshaven			Groningen	https://www.gem.wiki/EEM_power_station	L100000400513	G100000400514	FR0010208488	1	5793		29	2035	2075	2115	713233	740809	746224	651883	713037	713037	713037	713037	713037	713037	713037	713037
oil/gas	Netherlands	Europe	Western Europe	EEM power station	EC5	Eemscentrale		360	operating	1995		CC	NG					Engie Energie Nederland NV [100%]	ENGIE SA [100.0%]	53.4417	6.85605	exact	Eemshaven			Groningen	https://www.gem.wiki/EEM_power_station	L100000400513	G100000400515	FR0010208488	1	5793		29	2035	2075	2115	713233	740809	746224	651883	713037	713037	713037	713037	713037	713037	713037	713037
oil/gas	Netherlands	Europe	Western Europe	EEM power station	EC6	Eemscentrale		360	operating	1996		CC	NG					Engie Energie Nederland NV [100%]	ENGIE SA [100.0%]	53.4417	6.85605	exact	Eemshaven			Groningen	https://www.gem.wiki/EEM_power_station	L100000400513	G100000400516	FR0010208488	1	5793		28	2036	2076	2116	713233	740809	746224	651883	713037	713037	713037	713037	713037	713037	713037	713037
oil/gas	Netherlands	Europe	Western Europe	EEM power station	EC7	Eemscentrale		360	operating	1996		CC	NG					Engie Energie Nederland NV [100%]	ENGIE SA [100.0%]	53.4417	6.85605	exact	Eemshaven			Groningen	https://www.gem.wiki/EEM_power_station	L100000400513	G100000400517	FR0010208488	1	5793	5793	28	2036	2076	2116	713233	740809	746224	651883	713037	713037	713037	713037	713037	713037	713037	713037
oil/gas	Portugal	Europe	Southern Europe	Elecgas Pego power station	G3			418	operating	2011		CC	NG					ElecGas SA [100%]	Endesa SA [50.0%]; ENGIE SA [25.0%]; Marubeni Corp [25.0%]	39.4689	-8.1113	exact	Pego			Santarem	https://www.gem.wiki/Elecgas_Pego_power_station	L100000400584	G100000400584	FR0010208488	0.25	2508		13	2051	2091	2131	207036	215040	216612	189227	206979	206979	206979	206979	206979	206979	206979	206979
oil/gas	Portugal	Europe	Southern Europe	Elecgas Pego power station	G4			418	operating	2011		CC	NG					ElecGas SA [100%]	Endesa SA [50.0%]; ENGIE SA [25.0%]; Marubeni Corp [25.0%]	39.4689	-8.1113	exact	Pego			Santarem	https://www.gem.wiki/Elecgas_Pego_power_station	L100000400584	G100000400585	FR0010208488	0.25	2508	2508	13	2051	2091	2131	207036	215040	216612	189227	206979	206979	206979	206979	206979	206979	206979	206979
oil/gas	Saudi Arabia	Asia	Western Asia	Fadhili cogeneration power plant	1	محطة الفاضلي لتوليد الطاقة المزدوج		1520	operating	2020		CC	NG					Fadhili Plant Cogeneration Co [100.0%]	ENGIE SA [40.0%]; Saudi Arabian Oil Co [30.0%]; Saudi Electricity Co [30.0%]	27.1123	49.0714	exact	Jubail Industrial City			Eastern	https://www.gem.wiki/Fadhili_cogeneration_power_plant	L100000405542	G100000404751	FR0010208488	0.4	4560	4560	4	2060	2100	2140	1.20457e+06	1.25114e+06	1.26029e+06	1.10096e+06	1.20424e+06	1.20424e+06	1.20424e+06	1.20424e+06	1.20424e+06	1.20424e+06	1.20424e+06	1.20424e+06
oil/gas	United Arab Emirates	Asia	Western Asia	Fujairah F2 Integrated Water and power plant	1	محطة الفجيرة F2	FAPCO (Fuj F2)/Qidfa F2 Gas Power Plant	867	operating	2011	2031	CC	NG					Fujairah Asia Power Company PJSC [100.0%]	Abu Dhabi National Energy Company PJSC [60.0%]; ENGIE SA [20.0%]; Marubeni Corp [20.0%]	25.3019	56.3704	exact	Qidfa			Fujairah	https://www.gem.wiki/Fujairah_F2_Integrated_Water_and_power_plant	L100000405577	G100000405012	FR0010208488	0.2	6498		13	2051	2091	2131	343540	356823	359431	313990	343446	343446	343446	343446	343446	343446	343446	343446
oil/gas	United Arab Emirates	Asia	Western Asia	Fujairah F2 Integrated Water and power plant	2	محطة الفجيرة F2	FAPCO (Fuj F2)/Qidfa F2 Gas Power Plant	432	operating	2011	2031	CC	NG					Fujairah Asia Power Company PJSC [100.0%]	Abu Dhabi National Energy Company PJSC [60.0%]; ENGIE SA [20.0%]; Marubeni Corp [20.0%]	25.3019	56.3704	exact	Qidfa			Fujairah	https://www.gem.wiki/Fujairah_F2_Integrated_Water_and_power_plant	L100000405577	G100000405013	FR0010208488	0.2	6498		13	2051	2091	2131	171176	177794	179094	156452	171129	171129	171129	171129	171129	171129	171129	171129
oil/gas	United Arab Emirates	Asia	Western Asia	Fujairah F2 Integrated Water and power plant	3	محطة الفجيرة F2	FAPCO (Fuj F2)/Qidfa F2 Gas Power Plant	867	operating	2011	2031	CC	NG					Fujairah Asia Power Company PJSC [100.0%]	Abu Dhabi National Energy Company PJSC [60.0%]; ENGIE SA [20.0%]; Marubeni Corp [20.0%]	25.3019	56.3704	exact	Qidfa			Fujairah	https://www.gem.wiki/Fujairah_F2_Integrated_Water_and_power_plant	L100000405577	G100000405014	FR0010208488	0.2	6498	6498	13	2051	2091	2131	343540	356823	359431	313990	343446	343446	343446	343446	343446	343446	343446	343446
oil/gas	Germany	Europe	Western Europe	Gera-Lusan power station	IC			25	operating	2018		ICCC	NG					Engie Deutschland GmbH [100.0%]	ENGIE SA [100.0%]	50.8455	12.0788	exact	Gera			Thüringen	https://www.gem.wiki/Gera-Lusan_power_station	L100000408776	G100000412890	FR0010208488	1	75	75	6	2058	2098	2138	49530.1	51445.1	51821.1	45269.6	49516.5	49516.5	49516.5	49516.5	49516.5	49516.5	49516.5	49516.5
oil/gas	Germany	Europe	Western Europe	Gera-Tinz power station	IC			20	operating	2018		ICCC	NG					Engie Deutschland GmbH [100.0%]	ENGIE SA [100.0%]	50.8942	12.0745	exact	Gera			Thüringen	https://www.gem.wiki/Gera-Tinz_power_station	L100000400265	G100000400265	FR0010208488	1	60	60	6	2058	2098	2138	39624	41156.1	41456.9	36215.7	39613.2	39613.2	39613.2	39613.2	39613.2	39613.2	39613.2	39613.2
oil/gas	Belgium	Europe	Western Europe	Herdersbrug power station	1			465	operating	1998		CC	NG					Electrabel NV/SA [100%]	ENGIE SA [100.0%]	51.2629	3.2112	exact	Brugge			West Flanders	https://www.gem.wiki/Herdersbrug_power_station	L100000400027	G100000400027	FR0010208488	1	1395	1395	26	2038	2078	2118	921259	956878	963873	842015	921006	921006	921006	921006	921006	921006	921006	921006
oil/gas	Peru	Americas	Latin America and the Caribbean	Ilo power station	Ilo31-TG1	Central Termoeléctrica de Ilo	Ilo 21	190	operating	2013		GT	D					ENGIE Energía Perú SA [100%]	ENGIE Energía Perú SA [100.0%]	-17.776	-71.1893	exact	Ilo	Pacocha	Ilo	Moquegua	https://www.gem.wiki/Ilo_power_station	L100000103158	G100000406662	FR0010208488	1	4275		11	2053	2093	2133	150851	290628	355330	238458	242641	242641	242641	242641	242641	242641	242641	242641
oil/gas	Peru	Americas	Latin America and the Caribbean	Ilo power station	Ilo31-TG2	Central Termoeléctrica de Ilo	Ilo 21	190	operating	2013		GT	D					ENGIE Energía Perú SA [100%]	ENGIE Energía Perú SA [100.0%]	-17.776	-71.1893	exact	Ilo	Pacocha	Ilo	Moquegua	https://www.gem.wiki/Ilo_power_station	L100000103158	G100000406661	FR0010208488	1	4275		11	2053	2093	2133	150851	290628	355330	238458	242641	242641	242641	242641	242641	242641	242641	242641
oil/gas	Peru	Americas	Latin America and the Caribbean	Ilo power station	Ilo31-TG3	Central Termoeléctrica de Ilo	Ilo 21	190	operating	2013		GT	D					ENGIE Energía Perú SA [100%]	ENGIE Energía Perú SA [100.0%]	-17.776	-71.1893	exact	Ilo	Pacocha	Ilo	Moquegua	https://www.gem.wiki/Ilo_power_station	L100000103158	G100000406660	FR0010208488	1	4275		11	2053	2093	2133	150851	290628	355330	238458	242641	242641	242641	242641	242641	242641	242641	242641
oil/gas	Peru	Americas	Latin America and the Caribbean	Ilo power station	Ilo41-TG1	Central Termoeléctrica de Ilo	Ilo 21	240	operating	2016		GT	D					ENGIE Energía Perú SA [100%]	ENGIE Energía Perú SA [100.0%]	-17.776	-71.1893	exact	Ilo	Pacocha	Ilo	Moquegua	https://www.gem.wiki/Ilo_power_station	L100000103158	G100000406654	FR0010208488	1	4275		8	2056	2096	2136	190549	367109	448838	301210	306494	306494	306494	306494	306494	306494	306494	306494
oil/gas	Peru	Americas	Latin America and the Caribbean	Ilo power station	Ilo41-TG2	Central Termoeléctrica de Ilo	Ilo 21	240	operating	2016		GT	D					ENGIE Energía Perú SA [100%]	ENGIE Energía Perú SA [100.0%]	-17.776	-71.1893	exact	Ilo	Pacocha	Ilo	Moquegua	https://www.gem.wiki/Ilo_power_station	L100000103158	G100000406653	FR0010208488	1	4275		8	2056	2096	2136	190549	367109	448838	301210	306494	306494	306494	306494	306494	306494	306494	306494
oil/gas	Peru	Americas	Latin America and the Caribbean	Ilo power station	Ilo41-TG3	Central Termoeléctrica de Ilo	Ilo 21	240	operating	2016		GT	D					ENGIE Energía Perú SA [100%]	ENGIE Energía Perú SA [100.0%]	-17.776	-71.1893	exact	Ilo	Pacocha	Ilo	Moquegua	https://www.gem.wiki/Ilo_power_station	L100000103158	G100000406652	FR0010208488	1	4275	4275	8	2056	2096	2136	190549	367109	448838	301210	306494	306494	306494	306494	306494	306494	306494	306494
oil/gas	Saudi Arabia	Asia	Western Asia	Juaymah cogeneration Gas power plant	GT1	محطة الجعيمة لتوليد الكهرباء	Ju'Aymah/Juymah	155	operating	2006		GT	NG					Tihama Power Generation Co Ltd [100.0%]	ENGIE SA [60.0%]; Saudi Oger Ltd [40.0%]	27.0196	49.5784	approximate	Jubail			Eastern	https://www.gem.wiki/Juaymah_cogeneration_Gas_power_plant	L100000405546	G100000404984	FR0010208488	0.6	1490.1		18	2046	2086	2126	184252	191376	192775	168403	184201	184201	184201	184201	184201	184201	184201	184201
oil/gas	Saudi Arabia	Asia	Western Asia	Juaymah cogeneration Gas power plant	GT2	محطة الجعيمة لتوليد الكهرباء	Ju'Aymah/Juymah	155	operating	2006		GT	NG					Tihama Power Generation Co Ltd [100.0%]	ENGIE SA [60.0%]; Saudi Oger Ltd [40.0%]	27.0196	49.5784	approximate	Jubail			Eastern	https://www.gem.wiki/Juaymah_cogeneration_Gas_power_plant	L100000405546	G100000404985	FR0010208488	0.6	1490.1		18	2046	2086	2126	184252	191376	192775	168403	184201	184201	184201	184201	184201	184201	184201	184201
oil/gas	Saudi Arabia	Asia	Western Asia	Juaymah cogeneration Gas power plant	GT3	محطة الجعيمة لتوليد الكهرباء	Ju'Aymah/Juymah	186.7	operating	2015		GT	NG					Tihama Power Generation Co Ltd [100.0%]	ENGIE SA [60.0%]; Saudi Oger Ltd [40.0%]	27.0196	49.5784	approximate	Jubail			Eastern	https://www.gem.wiki/Juaymah_cogeneration_Gas_power_plant	L100000405546	G100000404983	FR0010208488	0.6	1490.1	1490.1	9	2055	2095	2135	221934	230515	232200	202844	221873	221873	221873	221873	221873	221873	221873	221873
oil/gas	Italy	Europe	Southern Europe	Leini power station	1			380	operating	2007		CC	NG					Engie Italia SpA [100.0%]	ENGIE SA [100.0%]	45.163	7.7505	exact	Leini			Turin	https://www.gem.wiki/Leini_power_station	L100000400391	G100000400391	FR0010208488	1	1140	1140	17	2047	2087	2127	752857	781965	787681	688099	752650	752650	752650	752650	752650	752650	752650	752650
oil/gas	Belgium	Europe	Western Europe	Les Awirs power station	CC1		Centrale des Awirs	875	pre-construction	2025		CC	NG					Electrabel NV/SA [100%]	ENGIE SA [100.0%]	50.5856	5.41687	exact	Flémalle			Liege	https://www.gem.wiki/Les_Awirs_power_station	L100000406373	G100000406281	FR0010208488	1	2625	2625	-1	2065	2105	2145	0	0	0	0	0	1.73308e+06	1.73308e+06	1.73308e+06	1.73308e+06	1.73308e+06	1.73308e+06	1.73308e+06
oil/gas	Belgium	Europe	Western Europe	Lillo Degussa power station	1		Evonik Degussa	42	operating	1999		CC	NG					Electrabel NV/SA [100%]	ENGIE SA [100.0%]	51.3095	4.30402	exact	Antwerp			Antwerp	https://www.gem.wiki/Lillo_Degussa_power_station	L100000400030	G100000400030	FR0010208488	1	255		25	2039	2079	2119	83210.5	86427.7	87059.5	76053	83187.7	83187.7	83187.7	83187.7	83187.7	83187.7	83187.7	83187.7
oil/gas	Belgium	Europe	Western Europe	Lillo Degussa power station	2		Evonik Degussa	43	operating	2011		CC	NG					Electrabel NV/SA [100%]	ENGIE SA [100.0%]	51.3095	4.30402	exact	Antwerp			Antwerp	https://www.gem.wiki/Lillo_Degussa_power_station	L100000400030	G100000410396	FR0010208488	1	255	255	13	2051	2091	2131	85191.7	88485.5	89132.3	77863.8	85168.3	85168.3	85168.3	85168.3	85168.3	85168.3	85168.3	85168.3
oil/gas	Netherlands	Europe	Western Europe	Maxima power station	4			440	operating	2010		CC	NG					ENGIE SA [100%]	ENGIE SA [100.0%]	52.5772	5.53	exact	Lelystad			Flevoland	https://www.gem.wiki/Maxima_power_station	L100000400544	G100000400544	FR0010208488	1	2640		14	2050	2090	2130	871729	905433	912052	796746	871490	871490	871490	871490	871490	871490	871490	871490
oil/gas	Netherlands	Europe	Western Europe	Maxima power station	5			440	operating	2010		CC	NG					ENGIE SA [100%]	ENGIE SA [100.0%]	52.5772	5.53	exact	Lelystad			Flevoland	https://www.gem.wiki/Maxima_power_station	L100000400544	G100000400545	FR0010208488	1	2640	2640	14	2050	2090	2130	871729	905433	912052	796746	871490	871490	871490	871490	871490	871490	871490	871490
oil/gas	Chile	Americas	Latin America and the Caribbean	Mejillones power station	3	Termoeléctrica Mejillones	Red Dragon (Unit 4/Unit 5)/IEM2 (Unit 5)/IEM1 (Unit 4)/Infraestructura Energética de Mejillones	245	operating	2000		CC	NG					ENGIE Energía Chile SA [100%]	ENGIE Energía Chile SA [100.0%]	-23.0892	-70.4103	exact	Mejillones			Antofagasta	https://www.gem.wiki/Mejillones_power_station	L100000100184	G100000406727	FR0010208488	1	3987		24	2040	2080	2120	485395	504162	507847	443643	485261	485261	485261	485261	485261	485261	485261	485261
oil/gas	Chile	Americas	Latin America and the Caribbean	Mejillones power station	Unit 4	Termoeléctrica Mejillones	IEM2 (Unit 5)/Infraestructura Energética de Mejillones/Red Dragon (Unit 4/Unit 5)/IEM1 (Unit 4)	375	announced	2025		ST	NG/D					ENGIE Energía Chile SA [100%]	ENGIE Energía Chile SA [100.0%]	-23.0892	-70.4103	exact	Mejillones			Antofagasta	https://www.gem.wiki/Mejillones_power_station	L100000100184	G100000106833	FR0010208488	1	3987	3987	-1	2065	2105	2145	0	0	0	0	0	742747	742747	742747	742747	742747	742747	742747
oil/gas	Australia	Oceania	Australia and New Zealand	Mintaro GT power station	1			90	operating	1990	2030	GT	NG					Synergen Power Pty Ltd [100.0%]	ENGIE SA [72.0%]; Mitsui & Co Ltd [28.0%]	-33.9032	138.738	exact	Stanley			South Australia	https://www.gem.wiki/Mintaro_GT_power_station	L100000405122	G100000401527	FR0010208488	0.72	270	270	34	2030	2070	2110	128382	133346	134320	117339	128347	128347	128347	128347	128347	128347	128347	128347
oil/gas	United Arab Emirates	Asia	Western Asia	Mirfa Independent Water and Power Project	1	محطة المرفأ للمنتج المستقل٫ محطة المرفأ الجديدة/محطة ميبكو	MIPCO/New Mifrah/New Al Mirfa Power Plant	90	operating	2017	2042	GT	NG					Mirfa International Power and Water Company PJSC [100.0%]	Abu Dhabi Water and Electricity Authority [60.0%]; ENGIE SA [20.0%]; Sojitz Corp [20.0%]	24.121	53.447	exact	Al Mirfa			Abu Dhabi	https://www.gem.wiki/Mirfa_Independent_Water_and_Power_Project	L100000405588	G100000405039	FR0010208488	0.2	5091		7	2057	2097	2137	35661.6	37040.5	37311.2	32594.1	35651.9	35651.9	35651.9	35651.9	35651.9	35651.9	35651.9	35651.9
oil/gas	United Arab Emirates	Asia	Western Asia	Mirfa Independent Water and Power Project	2	محطة المرفأ للمنتج المستقل٫ محطة المرفأ الجديدة/محطة ميبكو	MIPCO/New Mifrah/New Al Mirfa Power Plant	90	operating	2017	2042	GT	NG					Mirfa International Power and Water Company PJSC [100.0%]	Abu Dhabi Water and Electricity Authority [60.0%]; ENGIE SA [20.0%]; Sojitz Corp [20.0%]	24.121	53.447	exact	Al Mirfa			Abu Dhabi	https://www.gem.wiki/Mirfa_Independent_Water_and_Power_Project	L100000405588	G100000405040	FR0010208488	0.2	5091		7	2057	2097	2137	35661.6	37040.5	37311.2	32594.1	35651.9	35651.9	35651.9	35651.9	35651.9	35651.9	35651.9	35651.9
oil/gas	United Arab Emirates	Asia	Western Asia	Mirfa Independent Water and Power Project	3	محطة المرفأ للمنتج المستقل٫ محطة المرفأ الجديدة/محطة ميبكو	MIPCO/New Mifrah/New Al Mirfa Power Plant	90	operating	2017	2042	GT	NG					Mirfa International Power and Water Company PJSC [100.0%]	Abu Dhabi Water and Electricity Authority [60.0%]; ENGIE SA [20.0%]; Sojitz Corp [20.0%]	24.121	53.447	exact	Al Mirfa			Abu Dhabi	https://www.gem.wiki/Mirfa_Independent_Water_and_Power_Project	L100000405588	G100000405041	FR0010208488	0.2	5091		7	2057	2097	2137	35661.6	37040.5	37311.2	32594.1	35651.9	35651.9	35651.9	35651.9	35651.9	35651.9	35651.9	35651.9
oil/gas	United Arab Emirates	Asia	Western Asia	Mirfa Independent Water and Power Project	4	محطة المرفأ للمنتج المستقل٫ محطة المرفأ الجديدة/محطة ميبكو	MIPCO/New Mifrah/New Al Mirfa Power Plant	90	operating	2017	2042	GT	NG					Mirfa International Power and Water Company PJSC [100.0%]	Abu Dhabi Water and Electricity Authority [60.0%]; ENGIE SA [20.0%]; Sojitz Corp [20.0%]	24.121	53.447	exact	Al Mirfa			Abu Dhabi	https://www.gem.wiki/Mirfa_Independent_Water_and_Power_Project	L100000405588	G100000405042	FR0010208488	0.2	5091		7	2057	2097	2137	35661.6	37040.5	37311.2	32594.1	35651.9	35651.9	35651.9	35651.9	35651.9	35651.9	35651.9	35651.9
oil/gas	United Arab Emirates	Asia	Western Asia	Mirfa Independent Water and Power Project	CC	محطة المرفأ للمنتج المستقل٫ محطة المرفأ الجديدة/محطة ميبكو	MIPCO/New Mifrah/New Al Mirfa Power Plant	1337	operating	2017	2042	CC	NG					Mirfa International Power and Water Company PJSC [100.0%]	Abu Dhabi Water and Electricity Authority [60.0%]; ENGIE SA [20.0%]; Sojitz Corp [20.0%]	24.121	53.447	exact	Al Mirfa			Abu Dhabi	https://www.gem.wiki/Mirfa_Independent_Water_and_Power_Project	L100000405588	G100000405038	FR0010208488	0.2	5091	5091	7	2057	2097	2137	529773	550257	554279	484204	529628	529628	529628	529628	529628	529628	529628	529628
oil/gas	Belgium	Europe	Western Europe	Monsanto Oud-Lillo power station	1		Gasturbine Oud-Lillo/Oud-Lillo Monsanto	43	operating			not found	NG					Electrabel NV/SA [100%]	ENGIE SA [100.0%]	51.3155	4.28961	approximate	Antwerp			Antwerp	https://www.gem.wiki/Monsanto_Oud-Lillo_power_station	L100000406368	G100000406274	FR0010208488	1	129	129	-99	40	80	120	85191.7	88485.5	89132.3	77863.8	85168.3	85168.3	85168.3	85168.3	85168.3	85168.3	85168.3	85168.3
oil/gas	France	Europe	Western Europe	Montoir-De-Bretagne power station	1		SPEM/La Centrale Thermique de Grandes-Rivieres	435	operating	2010		CC	NG					Engie Energy France [100.0%]	ENGIE SA [100.0%]	47.3072	-2.13716	exact	Montoir-de-Bretagne			Loire-Atlantique	https://www.gem.wiki/Montoir-De-Bretagne_power_station	L100000400104	G100000400104	FR0010208488	1	1305	1305	14	2050	2090	2130	861823	895144	901688	787692	861587	861587	861587	861587	861587	861587	861587	861587
oil/gas	Italy	Europe	Southern Europe	Napoli Levante power station	1			400	operating	2009		CC	NG					Tirreno Power SpA [100.0%]	ENGIE SA [50.0%]; Energia Italiana SpA [50.0%]	40.8339	14.3006	exact	Napoli			Campania	https://www.gem.wiki/Napoli_Levante_power_station	L100000400407	G100000400407	FR0010208488	0.5	1200	1200	15	2049	2089	2129	396240	411561	414569	362157	396132	396132	396132	396132	396132	396132	396132	396132
oil/gas	United States	Americas	Northern America	Nassau Energy power station	CC1			55	retired	1991	2022	CC	NG/FO					Engie North America [100.0%]	ENGIE SA [100.0%]	40.7264	-73.5892	exact	Garden City	Nassau		New York	https://www.gem.wiki/Nassau_Energy_power_station	L100000401658	G100000401732	FR0010208488	1	165	165	33	2031	2071	2111	108966	113179	0	0	0	0	0	0	0	0	0	0
oil/gas	Italy	Europe	Southern Europe	Nera Montoro power station	1			50	operating	1994		CC	NG					Engie Servizi SpA [100.0%]	ENGIE SA [100.0%]	42.4943	12.4724	exact	Nera Montoro			Terni	https://www.gem.wiki/Nera_Montoro_power_station	L100000400408	G100000400408	FR0010208488	1	150	150	30	2034	2074	2114	99060.1	102890	103642	90539.3	99033	99033	99033	99033	99033	99033	99033	99033
oil/gas	United States	Americas	Northern America	Oyster Creek Unit VIII power station	CC1			498	operating	1994		CC	NG/OG					Engie North America [50.0%]; Toyota Tsusho Corp [37.5%]; GE Energy Financial Services [12.5%]	ENGIE SA [50.0%]; General Electric Co [12.5%]	28.9802	-95.342	exact	Freeport	Brazoria		Texas	https://www.gem.wiki/Oyster_Creek_Unit_VIII_power_station	L100000401670	G100000401762	FR0010208488	0.5	1494	1494	30	2034	2074	2114	493319	512393	516138	450886	493184	493184	493184	493184	493184	493184	493184	493184
[truncated: 237 more rows]
[truncated: 28 more columns]
