# Supplementary material for: Assessing corporate transition plans using a production asset-based planning approach
Source: Research Square preprint supplement (doi:10.21203/rs.3.rs-5245457/v1), 2024-12-09
Supplement: Supplementary file 27 [file 7 NextEraEnergy.xlsx]

## Sheet: NextEraEnergy_all
Type	Country/area	Region	Subregion	Plant / Project name	Unit / Phase name	Plant / Project name (local)	Plant / Project name (other)	Capacity (MW)	Status	Start year	Retired year	Technology	Fuel	Country/area 1 (hydropower only)	Country/area 2 (hydropower only)	Country/area 1 Capacity (MW) (hydropower only)	Country/area 2 Capacity (MW) (hydropower only)	Owner	Parent	Latitude	Longitude	Location accuracy	City	Local area (taluk, county)	Major area (prefecture, district)	Subnational unit (state, province)	GEM.Wiki URL	GEM location ID	GEM unit/phase ID	CompISIN	Ownership	Plant capacity	Plant capacity	Age	Reinvestment year	Reinvestment year	Reinvestment year
coal	United States	Americas	Northern America	Cedar Bay Cogeneration Plant	Unit 1			291.6	retired	1994	2016	subcritical	bituminous					Florida Power & Light [100%]	NextEra Energy Inc [100.0%]	30.4221	-81.6078	exact	Jacksonville	Duval		Florida	https://www.gem.wiki/Cedar_Bay_Cogeneration_Plant	L100000103822	G100000101250	US65339F1012	1	291.6	291.6	30	2034	2074	2114
coal	United States	Americas	Northern America	Daniel Generating Plant	Unit 1		Victor J. Daniel Generating Plant	500	operating	1977	2024	subcritical	bituminous					Florida Power & Light [50%]; Mississippi Power [50%]	NextEra Energy Inc [50.0%]; Southern Co [50.0%]	30.5327	-88.5571	exact	Escatawpa	Jackson		Mississippi	https://www.gem.wiki/Daniel_Generating_Plant	L100000104008	G100000101965	US65339F1012	0.5	1000		47	2017	2057	2097
coal	United States	Americas	Northern America	Daniel Generating Plant	Unit 2		Victor J. Daniel Generating Plant	500	operating	1981	2027	subcritical	bituminous					Florida Power & Light [50%]; Mississippi Power [50%]	NextEra Energy Inc [50.0%]; Southern Co [50.0%]	30.5327	-88.5571	exact	Escatawpa	Jackson		Mississippi	https://www.gem.wiki/Daniel_Generating_Plant	L100000104008	G100000101966	US65339F1012	0.5	1000	1000	43	2021	2061	2101
coal	United States	Americas	Northern America	Gulf Clean Energy Center	Unit 4		Crist Plant	93.7	retired	1959	2020	subcritical	bituminous					Florida Power & Light [100%]	NextEra Energy Inc [100.0%]	30.566	-87.2245	exact	Pensacola	Escambia		Florida	https://www.gem.wiki/Gulf_Clean_Energy_Center	L100000103824	G100000101827	US65339F1012	1	3242.5		65	1999	2039	2079
coal	United States	Americas	Northern America	Gulf Clean Energy Center	Unit 5		Crist Plant	93.7	retired	1961	2020	subcritical	bituminous					Florida Power & Light [100%]	NextEra Energy Inc [100.0%]	30.566	-87.2245	exact	Pensacola	Escambia		Florida	https://www.gem.wiki/Gulf_Clean_Energy_Center	L100000103824	G100000101828	US65339F1012	1	3242.5		63	2001	2041	2081
coal	United States	Americas	Northern America	Gulf Clean Energy Center	Unit 6		Crist Plant	369.7	retired	1970	2020	subcritical	bituminous					Florida Power & Light [100%]	NextEra Energy Inc [100.0%]	30.566	-87.2245	exact	Pensacola	Escambia		Florida	https://www.gem.wiki/Gulf_Clean_Energy_Center	L100000103824	G100000101829	US65339F1012	1	3242.5		54	2010	2050	2090
coal	United States	Americas	Northern America	Gulf Clean Energy Center	Unit 7		Crist Plant	578	retired	1973	2020	subcritical	bituminous					Florida Power & Light [100%]	NextEra Energy Inc [100.0%]	30.566	-87.2245	exact	Pensacola	Escambia		Florida	https://www.gem.wiki/Gulf_Clean_Energy_Center	L100000103824	G100000101830	US65339F1012	1	3242.5	3242.5	51	2013	2053	2093
coal	United States	Americas	Northern America	Indiantown Cogen power station	Unit 1			395.4	retired	1995	2020	subcritical	bituminous					Florida Power & Light [100%]	NextEra Energy Inc [100.0%]	27.0393	-80.5147	exact	Indiantown	Martin		Florida	https://www.gem.wiki/Indiantown_Cogen_power_station	L100000103828	G100000104844	US65339F1012	1	395.4	395.4	29	2035	2075	2115
coal	United States	Americas	Northern America	Lansing Smith Generating Plant	Unit 1			149.6	retired	1965	2016	subcritical	bituminous					Florida Power & Light [100%]	NextEra Energy Inc [100.0%]	30.2685	-85.7	exact	Lynn Haven	Bay		Florida	https://www.gem.wiki/Lansing_Smith_Generating_Plant	L100000103829	G100000106155	US65339F1012	1	340		59	2005	2045	2085
coal	United States	Americas	Northern America	Lansing Smith Generating Plant	Unit 2			190.4	retired	1967	2016	subcritical	bituminous					Florida Power & Light [100%]	NextEra Energy Inc [100.0%]	30.2685	-85.7	exact	Lynn Haven	Bay		Florida	https://www.gem.wiki/Lansing_Smith_Generating_Plant	L100000103829	G100000106156	US65339F1012	1	340	340	57	2007	2047	2087
coal	United States	Americas	Northern America	Scherer Steam Generating Station	Unit 3			891	operating	1987	2028	subcritical	subbituminous					Florida Power & Light [25%]; Georgia Power [75%]	Southern Co [75.0%]; NextEra Energy Inc [25.0%]	33.0603	-83.8069	exact	Juliette	Monroe		Georgia	https://www.gem.wiki/Scherer_Steam_Generating_Station	L100000103847	G100000108871	US65339F1012	0.25	1782		37	2027	2067	2107
coal	United States	Americas	Northern America	Scherer Steam Generating Station	Unit 4			891	retired	1989	2021	subcritical	subbituminous					JEA [23%]; Florida Power & Light [76%]	NextEra Energy Inc [76.4%]; JEA [23.6%]	33.0603	-83.8069	exact	Juliette	Monroe		Georgia	https://www.gem.wiki/Scherer_Steam_Generating_Station	L100000103847	G100000108872	US65339F1012	0.764	1782	1782	35	2029	2069	2109
coal	United States	Americas	Northern America	Scholz Generating Plant	Unit 1			49	retired	1953	2015	subcritical	bituminous					Florida Power & Light [100%]	NextEra Energy Inc [100.0%]	30.6693	-84.8877	exact	Sneads			Florida	https://www.gem.wiki/Scholz_Generating_Plant	L100000103832	G100000108883	US65339F1012	1	98		71	1993	2033	2073
coal	United States	Americas	Northern America	Scholz Generating Plant	Unit 2			49	retired	1953	2015	subcritical	bituminous					Florida Power & Light [100%]	NextEra Energy Inc [100.0%]	30.6693	-84.8877	exact	Sneads			Florida	https://www.gem.wiki/Scholz_Generating_Plant	L100000103832	G100000108884	US65339F1012	1	98	98	71	1993	2033	2073
coal	United States	Americas	Northern America	St. Johns River Power Park	Unit 2			679	retired	1988	2018	subcritical	bituminous					Florida Power & Light [20%]; JEA [80%]	JEA [80.0%]; NextEra Energy Inc [20.0%]	30.4309	-81.551	exact	Jacksonville	Duval		Florida	https://www.gem.wiki/St._Johns_River_Power_Park	L100000103834	G100000109586	US65339F1012	0.2	679	679	36	2028	2068	2108
oil/gas	United States	Americas	Northern America	Bayswater peaking facility	1			61	operating	2002		GT	NG					Bayswater Peaking Facility LLC [100.0%]	NextEra Energy Inc [100.0%]	40.6107	-73.7622	exact	Far Rockaway	Queens		New York	https://www.gem.wiki/Bayswater_peaking_facility	L100000401744	G100000402522	US65339F1012	1	61	61	22	2042	2082	2122
oil/gas	United States	Americas	Northern America	Cape Canaveral power station	PCC			1295	operating	2013		CC	NG/FO					Florida Power & Light Co [100.0%]	NextEra Energy Inc [100.0%]	28.4698	-80.7644	exact	Cocoa	Brevard		Florida	https://www.gem.wiki/Cape_Canaveral_power_station	L100000401947	G100000402107	US65339F1012	1	1295	1295	11	2053	2093	2133
oil/gas	United States	Americas	Northern America	Fort Myers power station	9			62	operating	1974		GT	FO					Florida Power & Light Co [100.0%]	NextEra Energy Inc [100.0%]	26.6967	-81.7831	exact	Ft. Myers	Lee		Florida	https://www.gem.wiki/Fort_Myers_power_station	L100000401948	G100000414271	US65339F1012	1	2682		50	2014	2054	2094
oil/gas	United States	Americas	Northern America	Fort Myers power station	GT1			62	operating	1974		GT	FO					Florida Power & Light Co [100.0%]	NextEra Energy Inc [100.0%]	26.6967	-81.7831	exact	Ft. Myers	Lee		Florida	https://www.gem.wiki/Fort_Myers_power_station	L100000401948	G100000414270	US65339F1012	1	2682		50	2014	2054	2094
oil/gas	United States	Americas	Northern America	Fort Myers power station	F901			1722	operating	2001		CC	NG/FO					Florida Power & Light Co [100.0%]	NextEra Energy Inc [100.0%]	26.6967	-81.7831	exact	Ft. Myers	Lee		Florida	https://www.gem.wiki/Fort_Myers_power_station	L100000401948	G100000402113	US65339F1012	1	2682		23	2041	2081	2121
oil/gas	United States	Americas	Northern America	Fort Myers power station	CT1			188	operating	2003		GT	NG/FO					Florida Power & Light Co [100.0%]	NextEra Energy Inc [100.0%]	26.6967	-81.7831	exact	Ft. Myers	Lee		Florida	https://www.gem.wiki/Fort_Myers_power_station	L100000401948	G100000402902	US65339F1012	1	2682		21	2043	2083	2123
oil/gas	United States	Americas	Northern America	Fort Myers power station	CT2			188	operating	2003		GT	NG/FO					Florida Power & Light Co [100.0%]	NextEra Energy Inc [100.0%]	26.6967	-81.7831	exact	Ft. Myers	Lee		Florida	https://www.gem.wiki/Fort_Myers_power_station	L100000401948	G100000402903	US65339F1012	1	2682		21	2043	2083	2123
oil/gas	United States	Americas	Northern America	Fort Myers power station	PFM3C			230	operating	2016		GT	NG/FO					Florida Power & Light Co [100.0%]	NextEra Energy Inc [100.0%]	26.6967	-81.7831	exact	Ft. Myers	Lee		Florida	https://www.gem.wiki/Fort_Myers_power_station	L100000401948	G100000402904	US65339F1012	1	2682		8	2056	2096	2136
oil/gas	United States	Americas	Northern America	Fort Myers power station	PFM3D			230	operating	2016		GT	NG/FO					Florida Power & Light Co [100.0%]	NextEra Energy Inc [100.0%]	26.6967	-81.7831	exact	Ft. Myers	Lee		Florida	https://www.gem.wiki/Fort_Myers_power_station	L100000401948	G100000402905	US65339F1012	1	2682	2682	8	2056	2096	2136
oil/gas	United States	Americas	Northern America	Gulf Clean Energy Center	4		Crist plant	93.7	operating	2021		ST	NG					Florida Power & Light Co [100.0%]	NextEra Energy Inc [100.0%]	30.5661	-87.2244	exact	Pensacola	Escambia		Florida	https://www.gem.wiki/Gulf_Clean_Energy_Center	L100000103824	G100000411172	US65339F1012	1	3242.5		3	2061	2101	2141
oil/gas	United States	Americas	Northern America	Gulf Clean Energy Center	5		Crist plant	93.7	operating	2021		ST	NG					Florida Power & Light Co [100.0%]	NextEra Energy Inc [100.0%]	30.5661	-87.2244	exact	Pensacola	Escambia		Florida	https://www.gem.wiki/Gulf_Clean_Energy_Center	L100000103824	G100000411171	US65339F1012	1	3242.5		3	2061	2101	2141
oil/gas	United States	Americas	Northern America	Gulf Clean Energy Center	6		Crist plant	370	operating	2021		ST	NG					Florida Power & Light Co [100.0%]	NextEra Energy Inc [100.0%]	30.5661	-87.2244	exact	Pensacola	Escambia		Florida	https://www.gem.wiki/Gulf_Clean_Energy_Center	L100000103824	G100000409445	US65339F1012	1	3242.5		3	2061	2101	2141
oil/gas	United States	Americas	Northern America	Gulf Clean Energy Center	7		Crist plant	578	operating	2021		ST	NG					Florida Power & Light Co [100.0%]	NextEra Energy Inc [100.0%]	30.5661	-87.2244	exact	Pensacola	Escambia		Florida	https://www.gem.wiki/Gulf_Clean_Energy_Center	L100000103824	G100000409444	US65339F1012	1	3242.5		3	2061	2101	2141
oil/gas	United States	Americas	Northern America	Gulf Clean Energy Center	8A		Crist plant	243	operating	2021		GT	NG/FO					Florida Power & Light Co [100.0%]	NextEra Energy Inc [100.0%]	30.5661	-87.2244	exact	Pensacola	Escambia		Florida	https://www.gem.wiki/Gulf_Clean_Energy_Center	L100000103824	G100000410533	US65339F1012	1	3242.5		3	2061	2101	2141
oil/gas	United States	Americas	Northern America	Gulf Clean Energy Center	8B		Crist plant	243	operating	2021		GT	NG/FO					Florida Power & Light Co [100.0%]	NextEra Energy Inc [100.0%]	30.5661	-87.2244	exact	Pensacola	Escambia		Florida	https://www.gem.wiki/Gulf_Clean_Energy_Center	L100000103824	G100000410532	US65339F1012	1	3242.5		3	2061	2101	2141
oil/gas	United States	Americas	Northern America	Gulf Clean Energy Center	8C		Crist plant	243	operating	2021		GT	NG/FO					Florida Power & Light Co [100.0%]	NextEra Energy Inc [100.0%]	30.5661	-87.2244	exact	Pensacola	Escambia		Florida	https://www.gem.wiki/Gulf_Clean_Energy_Center	L100000103824	G100000410531	US65339F1012	1	3242.5		3	2061	2101	2141
oil/gas	United States	Americas	Northern America	Gulf Clean Energy Center	8D		Crist plant	243	operating	2021		GT	NG/FO					Florida Power & Light Co [100.0%]	NextEra Energy Inc [100.0%]	30.5661	-87.2244	exact	Pensacola	Escambia		Florida	https://www.gem.wiki/Gulf_Clean_Energy_Center	L100000103824	G100000410530	US65339F1012	1	3242.5	3242.5	3	2061	2101	2141
oil/gas	United States	Americas	Northern America	Lauderdale power station	6A			230	operating	2016		GT	NG/FO					Florida Power & Light Co [100.0%]	NextEra Energy Inc [100.0%]	26.0686	-80.1984	exact	Ft. Lauderdale	Broward		Florida	https://www.gem.wiki/Lauderdale_power_station	L100000401949	G100000402906	US65339F1012	1	2313		8	2056	2096	2136
oil/gas	United States	Americas	Northern America	Lauderdale power station	6B			230	operating	2016		GT	NG/FO					Florida Power & Light Co [100.0%]	NextEra Energy Inc [100.0%]	26.0686	-80.1984	exact	Ft. Lauderdale	Broward		Florida	https://www.gem.wiki/Lauderdale_power_station	L100000401949	G100000402907	US65339F1012	1	2313		8	2056	2096	2136
oil/gas	United States	Americas	Northern America	Lauderdale power station	6C			230	operating	2016		GT	NG/FO					Florida Power & Light Co [100.0%]	NextEra Energy Inc [100.0%]	26.0686	-80.1984	exact	Ft. Lauderdale	Broward		Florida	https://www.gem.wiki/Lauderdale_power_station	L100000401949	G100000402908	US65339F1012	1	2313		8	2056	2096	2136
oil/gas	United States	Americas	Northern America	Lauderdale power station	6D			230	operating	2016		GT	NG/FO					Florida Power & Light Co [100.0%]	NextEra Energy Inc [100.0%]	26.0686	-80.1984	exact	Ft. Lauderdale	Broward		Florida	https://www.gem.wiki/Lauderdale_power_station	L100000401949	G100000402909	US65339F1012	1	2313		8	2056	2096	2136
oil/gas	United States	Americas	Northern America	Lauderdale power station	6E			230	operating	2016		GT	NG/FO					Florida Power & Light Co [100.0%]	NextEra Energy Inc [100.0%]	26.0686	-80.1984	exact	Ft. Lauderdale	Broward		Florida	https://www.gem.wiki/Lauderdale_power_station	L100000401949	G100000402910	US65339F1012	1	2313		8	2056	2096	2136
oil/gas	United States	Americas	Northern America	Lauderdale power station	DBCC		Dania Beach Energy Center	1163	operating	2022		CC	NG/FO					Florida Power & Light Co [100.0%]	NextEra Energy Inc [100.0%]	26.0686	-80.1984	exact	Ft. Lauderdale	Broward		Florida	https://www.gem.wiki/Lauderdale_power_station	L100000401949	G100000402115	US65339F1012	1	2313	2313	2	2062	2102	2142
oil/gas	United States	Americas	Northern America	Manatee power station	1			863	operating	1976		ST	NG/FO					Florida Power & Light Co [100.0%]	NextEra Energy Inc [100.0%]	27.6058	-82.3456	exact	Parrish	Manatee		Florida	https://www.gem.wiki/Manatee_power_station	L100000401950	G100000409498	US65339F1012	1	2951		48	2016	2056	2096
oil/gas	United States	Americas	Northern America	Manatee power station	2			863	operating	1977		ST	NG/FO					Florida Power & Light Co [100.0%]	NextEra Energy Inc [100.0%]	27.6058	-82.3456	exact	Parrish	Manatee		Florida	https://www.gem.wiki/Manatee_power_station	L100000401950	G100000409497	US65339F1012	1	2951		47	2017	2057	2097
oil/gas	United States	Americas	Northern America	Manatee power station	G341			1225	operating	2005		CC	NG/FO					Florida Power & Light Co [100.0%]	NextEra Energy Inc [100.0%]	27.6058	-82.3456	exact	Parrish	Manatee		Florida	https://www.gem.wiki/Manatee_power_station	L100000401950	G100000402093	US65339F1012	1	2951	2951	19	2045	2085	2125
oil/gas	United States	Americas	Northern America	Martin Point power station	C796			612	operating	1994		CC	NG/FO					Florida Power & Light Co [100.0%]	NextEra Energy Inc [100.0%]	27.0536	-80.5628	exact	Indiantown	Martin		Florida	https://www.gem.wiki/Martin_Point_power_station	L100000401951	G100000402094	US65339F1012	1	2449		30	2034	2074	2114
oil/gas	United States	Americas	Northern America	Martin Point power station	C797			612	operating	1994		CC	NG/FO					Florida Power & Light Co [100.0%]	NextEra Energy Inc [100.0%]	27.0536	-80.5628	exact	Indiantown	Martin		Florida	https://www.gem.wiki/Martin_Point_power_station	L100000401951	G100000402095	US65339F1012	1	2449		30	2034	2074	2114
oil/gas	United States	Americas	Northern America	Martin Point power station	G342			1225	operating	2005		ISCC	NG/FO					Florida Power & Light Co [100.0%]	NextEra Energy Inc [100.0%]	27.0536	-80.5628	exact	Indiantown	Martin		Florida	https://www.gem.wiki/Martin_Point_power_station	L100000401951	G100000402096	US65339F1012	1	2449	2449	19	2045	2085	2125
oil/gas	United States	Americas	Northern America	Okeechobee Clean energy center	CC1			1723	operating	2019		CC	NG/FO					Florida Power & Light Co [100.0%]	NextEra Energy Inc [100.0%]	27.6342	-80.7911	exact	Okeechobee	Okeechobee		Florida	https://www.gem.wiki/Okeechobee_Clean_energy_center	L100000401952	G100000402090	US65339F1012	1	1723	1723	5	2059	2099	2139
oil/gas	United States	Americas	Northern America	Oleander power project	OG1			199	operating	2002		GT	NG/FO					Oleander Holdings LLC [100.0%]	NextEra Energy Inc [100.0%]	28.3661	-80.7947	exact	Cocoa	Brevard		Florida	https://www.gem.wiki/Oleander_power_project	L100000402171	G100000403332	US65339F1012	1	995		22	2042	2082	2122
oil/gas	United States	Americas	Northern America	Oleander power project	OG2			199	operating	2002		GT	NG/FO					Oleander Holdings LLC [100.0%]	NextEra Energy Inc [100.0%]	28.3661	-80.7947	exact	Cocoa	Brevard		Florida	https://www.gem.wiki/Oleander_power_project	L100000402171	G100000403333	US65339F1012	1	995		22	2042	2082	2122
oil/gas	United States	Americas	Northern America	Oleander power project	OG3			199	operating	2002		GT	NG/FO					Oleander Holdings LLC [100.0%]	NextEra Energy Inc [100.0%]	28.3661	-80.7947	exact	Cocoa	Brevard		Florida	https://www.gem.wiki/Oleander_power_project	L100000402171	G100000403334	US65339F1012	1	995		22	2042	2082	2122
oil/gas	United States	Americas	Northern America	Oleander power project	OG4			199	operating	2002		GT	NG/FO					Oleander Holdings LLC [100.0%]	NextEra Energy Inc [100.0%]	28.3661	-80.7947	exact	Cocoa	Brevard		Florida	https://www.gem.wiki/Oleander_power_project	L100000402171	G100000403335	US65339F1012	1	995		22	2042	2082	2122
oil/gas	United States	Americas	Northern America	Oleander power project	OG5			199	operating	2007		GT	NG/FO					Oleander Holdings LLC [100.0%]	NextEra Energy Inc [100.0%]	28.3661	-80.7947	exact	Cocoa	Brevard		Florida	https://www.gem.wiki/Oleander_power_project	L100000402171	G100000403336	US65339F1012	1	995	995	17	2047	2087	2127
oil/gas	United States	Americas	Northern America	Port Everglades power station	CC1			1352	operating	2016		CC	NG/FO					Florida Power & Light Co [100.0%]	NextEra Energy Inc [100.0%]	26.0856	-80.1253	exact	Ft. Lauderdale	Broward		Florida	https://www.gem.wiki/Port_Everglades_power_station	L100000401953	G100000402116	US65339F1012	1	1352	1352	8	2056	2096	2136
oil/gas	United States	Americas	Northern America	Riviera power station	PRV			1295	operating	2014		CC	NG/FO					Florida Power & Light Co [100.0%]	NextEra Energy Inc [100.0%]	26.7653	-80.0525	exact	Riviera Beach	Palm Beach		Florida	https://www.gem.wiki/Riviera_power_station	L100000401954	G100000402117	US65339F1012	1	1295	1295	10	2054	2094	2134
oil/gas	United States	Americas	Northern America	Sanford power station	G161			1189	operating	2002		CC	NG					Florida Power & Light Co [100.0%]	NextEra Energy Inc [100.0%]	28.8419	-81.3256	exact	DeBary	Volusia		Florida	https://www.gem.wiki/Sanford_power_station	L100000401955	G100000402119	US65339F1012	1	2378		22	2042	2082	2122
oil/gas	United States	Americas	Northern America	Sanford power station	G160			1189	operating	2003		CC	NG					Florida Power & Light Co [100.0%]	NextEra Energy Inc [100.0%]	28.8419	-81.3256	exact	DeBary	Volusia		Florida	https://www.gem.wiki/Sanford_power_station	L100000401955	G100000402118	US65339F1012	1	2378	2378	21	2043	2083	2123
oil/gas	United States	Americas	Northern America	Turkey Point power station	G901			1224	operating	2007		CC	NG/FO					Florida Power & Light Co [100.0%]	NextEra Energy Inc [100.0%]	25.4356	-80.3308	exact	Homestead	Miami Dade		Florida	https://www.gem.wiki/Turkey_Point_power_station	L100000401956	G100000402123	US65339F1012	1	1224	1224	17	2047	2087	2127
oil/gas	United States	Americas	Northern America	West County energy center	WC1			1421	operating	2009		CC	NG/FO					Florida Power & Light Co [100.0%]	NextEra Energy Inc [100.0%]	26.6986	-80.3747	exact	Loxahatchee	Palm Beach		Florida	https://www.gem.wiki/West_County_energy_center	L100000401957	G100000402020	US65339F1012	1	4263		15	2049	2089	2129
oil/gas	United States	Americas	Northern America	West County energy center	WC2			1421	operating	2009		CC	NG/FO					Florida Power & Light Co [100.0%]	NextEra Energy Inc [100.0%]	26.6986	-80.3747	exact	Loxahatchee	Palm Beach		Florida	https://www.gem.wiki/West_County_energy_center	L100000401957	G100000402021	US65339F1012	1	4263		15	2049	2089	2129
oil/gas	United States	Americas	Northern America	West County energy center	WC3			1421	operating	2011		CC	NG/FO					Florida Power & Light Co [100.0%]	NextEra Energy Inc [100.0%]	26.6986	-80.3747	exact	Loxahatchee	Palm Beach		Florida	https://www.gem.wiki/West_County_energy_center	L100000401957	G100000402022	US65339F1012	1	4263	4263	13	2051	2091	2131
oil/gas	United States	Americas	Northern America	William F Wyman Hybrid power station	1			50	operating	1957		ST	HFO					FPL Energy Wyman LLC [100.0%]	NextEra Energy Maine LLC	43.7508	-70.1567	exact	Yarmouth	Cumberland		Maine	https://www.gem.wiki/William_F_Wyman_Hybrid_power_station	L100000409248	G100000414159	US65339F1012	1	846		67	1997	2037	2077
oil/gas	United States	Americas	Northern America	William F Wyman Hybrid power station	2			50	operating	1958		ST	HFO					FPL Energy Wyman LLC [100.0%]	NextEra Energy Maine LLC	43.7508	-70.1567	exact	Yarmouth	Cumberland		Maine	https://www.gem.wiki/William_F_Wyman_Hybrid_power_station	L100000409248	G100000414158	US65339F1012	1	846		66	1998	2038	2078
oil/gas	United States	Americas	Northern America	William F Wyman Hybrid power station	3			113.6	operating	1965		ST	HFO					FPL Energy Wyman LLC [100.0%]	NextEra Energy Maine LLC	43.7508	-70.1567	exact	Yarmouth	Cumberland		Maine	https://www.gem.wiki/William_F_Wyman_Hybrid_power_station	L100000409248	G100000414157	US65339F1012	1	846		59	2005	2045	2085
oil/gas	United States	Americas	Northern America	William F Wyman Hybrid power station	4			632.4	operating	1978		ST	HFO					FPL Energy Wyman LLC [84.3%]; Constellation Nuclear LLC [5.9%]; Massachusetts Mun Wholes Electric Co [3.7%]; Public Service Company of New Hampshire [3.1%]; other [2.9%]	Eversource Energy [3.1%]; Constellation Energy Corp; NextEra Energy Maine LLC	43.7508	-70.1567	exact	Yarmouth	Cumberland		Maine	https://www.gem.wiki/William_F_Wyman_Hybrid_power_station	L100000409248	G100000414156	US65339F1012	0.33	846	846	46	2018	2058	2098
solar	United States	Americas	Northern America	Adelanto Solar				20	operating	2015		PV						NextEra Energy INC		34.5572	-117.377	exact		San Bernardino County		California	https://gem.wiki/Adelanto_Solar	L804609	G805322	US65339F1012	1	20	20	9	2055	2095	2135
solar	United States	Americas	Northern America	Appleseed Solar				200	pre-construction	2023		PV						NextEra Energy INC		40.7202	-86.2911	approximate		Cass County		Indiana	https://gem.wiki/Appleseed_Solar	L808383	G810574	US65339F1012	1	200	200	1	2063	2103	2143
solar	United States	Americas	Northern America	Arlington Energy Center (NextEra) solar farm	1			100	operating	2022		PV						NextEra Energy INC		33.6909	-114.775	exact	Blythe	Riverside County		California	https://gem.wiki/Arlington_Energy_Center_(NextEra)_solar_farm	L804610	G805323	US65339F1012	1	364		2	2062	2102	2142
solar	United States	Americas	Northern America	Arlington Energy Center (NextEra) solar farm	3			131	operating	2022		PV						NextEra Energy INC		33.6909	-114.775	exact	Blythe	Riverside County		California	https://gem.wiki/Arlington_Energy_Center_(NextEra)_solar_farm	L804610	G805324	US65339F1012	1	364		2	2062	2102	2142
solar	United States	Americas	Northern America	Arlington Energy Center (NextEra) solar farm	2			133	construction	2023		PV						NextEra Energy INC		33.6909	-114.775	exact	Blythe	Riverside County		California	https://gem.wiki/Arlington_Energy_Center_(NextEra)_solar_farm	L804610	G805325	US65339F1012	1	364	364	1	2063	2103	2143
solar	United States	Americas	Northern America	Babbitt Ranch Solar			Babbitt Ranch Energy	60	announced	2025		PV						NextEra Energy INC		32.0838	-110.867	approximate		Coconico County		Arizona	https://gem.wiki/Babbitt_Ranch_Solar	L805170	G805951	US65339F1012	1	60	60	-1	2065	2105	2145
solar	United States	Americas	Northern America	Babcock Preserve solar farm				74	operating	2020		PV						NextEra Energy INC		26.854	-81.725	exact		Charlotte County		Florida	https://gem.wiki/Babcock_Preserve_solar_farm	L804611	G805326	US65339F1012	1	74		4	2060	2100	2140
solar	United States	Americas	Northern America	Babcock Solar Energy Center Hybrid			Babcock Ranch Solar	74	operating	2016		PV						NextEra Energy INC		26.865	-81.741	exact		Charlotte County		Florida	https://gem.wiki/Babcock_Solar_Energy_Center_Hybrid	L804612	G805327	US65339F1012	1	74		8	2056	2096	2136
solar	United States	Americas	Northern America	Barefoot Bay Solar Energy Center				74	operating	2018		PV						NextEra Energy INC		27.8658	-80.5211	exact		Brevard County		Florida	https://gem.wiki/Barefoot_Bay_Solar_Energy_Center	L804613	G805328	US65339F1012	1	74		6	2058	2098	2138
solar	United States	Americas	Northern America	Bell Ridge Solar				74	construction	2023		PV						NextEra Energy INC		29.7187	-82.7108	exact		Gilchrist County		Florida	https://gem.wiki/Bell_Ridge_Solar	L808389	G810580	US65339F1012	1	74	74	1	2063	2103	2143
solar	United States	Americas	Northern America	Big Cypress Solar				180	pre-construction	2023		PV						NextEra Energy INC		35.3446	-90.3075	approximate		Crittenden County		Arkansas	https://gem.wiki/Big_Cypress_Solar	L808391	G810585	US65339F1012	1	180	180	1	2063	2103	2143
solar	United States	Americas	Northern America	Blackburn Solar				58	pre-construction			PV						NextEra Energy INC		35.5761	-81.2981	approximate		Catawba County		North Carolina	https://gem.wiki/Blackburn_Solar	L808392	G810586	US65339F1012	1	58	58	-99	40	80	120
solar	United States	Americas	Northern America	Blue Cypress Solar Energy Center				74	operating	2018		PV						NextEra Energy INC		27.601	-80.533	exact		Indian River County		Florida	https://gem.wiki/Blue_Cypress_Solar_Energy_Center	L804614	G805329	US65339F1012	1	74		6	2058	2098	2138
solar	United States	Americas	Northern America	Blue Heron Solar				74	operating	2020		PV						NextEra Energy INC		26.7016	-81.1292	exact		Hendry County		Florida	https://gem.wiki/Blue_Heron_Solar	L804615	G805330	US65339F1012	1	74	74	4	2060	2100	2140
solar	United States	Americas	Northern America	Blue Springs solar farm				75	operating	2022		PV						NextEra Energy INC		30.7829	-85.0787	exact	Marianna	Jackson County		Florida	https://gem.wiki/Blue_Springs_solar_farm	L804616	G805331	US65339F1012	1	75	75	2	2062	2102	2142
solar	United States	Americas	Northern America	Bluebell Solar	1			30	operating	2018		PV						NextEra Energy INC		31.8701	-100.828	exact		Sterling County		Texas	https://gem.wiki/Bluebell_Solar	L805171	G805952	US65339F1012	1	145		6	2058	2098	2138
solar	United States	Americas	Northern America	Bluebell Solar	2			115	operating	2020		PV						NextEra Energy INC		31.889	-100.842	exact		Sterling County		Texas	https://gem.wiki/Bluebell_Solar	L805171	G805953	US65339F1012	1	145	145	4	2060	2100	2140
solar	United States	Americas	Northern America	Blythe (NextEra) solar farm	1A		Blythe Solar 110	39	operating	2016		PV						NextEra Energy INC		33.6801	-114.742	exact		Riverside County		California	https://gem.wiki/Blythe_(NextEra)_solar_farm	L805172	G805960	US65339F1012	1	516		8	2056	2096	2136
solar	United States	Americas	Northern America	Blythe (NextEra) solar farm	1B		Blythe Solar 110	36	operating	2016		PV						NextEra Energy INC		33.6801	-114.742	exact		Riverside County		California	https://gem.wiki/Blythe_(NextEra)_solar_farm	L805172	G805959	US65339F1012	1	516		8	2056	2096	2136
solar	United States	Americas	Northern America	Blythe (NextEra) solar farm	1C		Blythe Solar 110	35	operating	2016		PV						NextEra Energy INC		33.6801	-114.742	exact		Riverside County		California	https://gem.wiki/Blythe_(NextEra)_solar_farm	L805172	G805958	US65339F1012	1	516		8	2056	2096	2136
solar	United States	Americas	Northern America	Blythe (NextEra) solar farm	2A		Blythe Solar II	33	operating	2016		PV						NextEra Energy INC		33.6801	-114.73	exact		Riverside County		California	https://gem.wiki/Blythe_(NextEra)_solar_farm	L805172	G805956	US65339F1012	1	516		8	2056	2096	2136
solar	United States	Americas	Northern America	Blythe (NextEra) solar farm	2B		Blythe Solar II	34	operating	2016		PV						NextEra Energy INC		33.6801	-114.73	exact		Riverside County		California	https://gem.wiki/Blythe_(NextEra)_solar_farm	L805172	G805957	US65339F1012	1	516		8	2056	2096	2136
solar	United States	Americas	Northern America	Blythe (NextEra) solar farm	2C		Blythe Solar II	32	operating	2016		PV						NextEra Energy INC		33.674	-114.744	exact		Riverside County		California	https://gem.wiki/Blythe_(NextEra)_solar_farm	L805172	G805954	US65339F1012	1	516		8	2056	2096	2136
solar	United States	Americas	Northern America	Blythe (NextEra) solar farm	2D		Blythe Solar II	32	operating	2016		PV						NextEra Energy INC		33.674	-114.744	exact		Riverside County		California	https://gem.wiki/Blythe_(NextEra)_solar_farm	L805172	G805955	US65339F1012	1	516		8	2056	2096	2136
solar	United States	Americas	Northern America	Blythe (NextEra) solar farm	3A		Blythe Solar III Hybrid	137	operating	2020		PV						NextEra Energy INC		33.656	-114.742	exact		Riverside County		California	https://gem.wiki/Blythe_(NextEra)_solar_farm	L805172	G805963	US65339F1012	1	516		4	2060	2100	2140
solar	United States	Americas	Northern America	Blythe (NextEra) solar farm	4A		Blythe Solar IV	69	operating	2020		PV						NextEra Energy INC		33.682	-114.768	exact		Riverside County		California	https://gem.wiki/Blythe_(NextEra)_solar_farm	L805172	G805961	US65339F1012	1	516		4	2060	2100	2140
solar	United States	Americas	Northern America	Blythe (NextEra) solar farm	4B		Blythe Solar IV	69	operating	2020		PV						NextEra Energy INC		33.682	-114.768	exact		Riverside County		California	https://gem.wiki/Blythe_(NextEra)_solar_farm	L805172	G805962	US65339F1012	1	516	516	4	2060	2100	2140
solar	United States	Americas	Northern America	Blythe Solar Power Project	1			125	cancelled			Solar Thermal						NextEra Energy INC		33.6725	-114.75	exact		Riverside County		California	https://gem.wiki/Blythe_Solar_Power_Project	L808397	G810591	US65339F1012	1	796		-99	40	80	120
solar	United States	Americas	Northern America	Blythe Solar Power Project	2			125	cancelled			Solar Thermal						NextEra Energy INC		33.6725	-114.75	exact		Riverside County		California	https://gem.wiki/Blythe_Solar_Power_Project	L808397	G810592	US65339F1012	1	796		-99	40	80	120
solar	United States	Americas	Northern America	Blythe Solar Power Project	3			273	cancelled			Solar Thermal						NextEra Energy INC		33.6725	-114.75	exact		Riverside County		California	https://gem.wiki/Blythe_Solar_Power_Project	L808397	G810593	US65339F1012	1	796		-99	40	80	120
solar	United States	Americas	Northern America	Blythe Solar Power Project	4			273	cancelled			Solar Thermal						NextEra Energy INC		33.6725	-114.75	exact		Riverside County		California	https://gem.wiki/Blythe_Solar_Power_Project	L808397	G810594	US65339F1012	1	796	796	-99	40	80	120
solar	United States	Americas	Northern America	Boulder Flats Solar				113	construction	2024		PV						NextEra Energy INC		35.8789	-114.983	exact	Wadsworth	Washoe County		Nevada	https://gem.wiki/Boulder_Flats_Solar	L805173	G805964	US65339F1012	1	113	113	0	2064	2104	2144
solar	United States	Americas	Northern America	Bowling Green Solar			DG AMP Solar Bowling Green	20	operating	2017		PV						NextEra Energy INC		41.396	-83.582	exact		Wood County		Ohio	https://gem.wiki/Bowling_Green_Solar	L804617	G805332	US65339F1012	1	20	20	7	2057	2097	2137
solar	United States	Americas	Northern America	Brickyard Solar Project				200	cancelled			PV						NextEra Energy INC		40.046	-86.4651	approximate		Boone County		Indiana	https://gem.wiki/Brickyard_Solar_Project	L804618	G805333	US65339F1012	1	200	200	-99	40	80	120
solar	United States	Americas	Northern America	Briel Farm solar farm				20	operating	2021		PV						NextEra Energy INC		37.5236	-77.2636	exact		Henrico County		Virginia	https://gem.wiki/Briel_Farm_solar_farm	L804619	G805334	US65339F1012	1	20	20	3	2061	2101	2141
solar	United States	Americas	Northern America	Brookline Solar				75	cancelled			PV						NextEra Energy INC		40.1729	-76.5466	approximate		Lancaster County		Pennsylvania	https://gem.wiki/Brookline_Solar	L808400	G810597	US65339F1012	1	75	75	-99	40	80	120
solar	United States	Americas	Northern America	Buena Vista Solar Project			Otero Solar	120	operating	2023		PV						NextEra Energy INC		32.075	-106.333	approximate		Otero County		New Mexico	https://gem.wiki/Buena_Vista_Solar_Project	L805174	G805965	US65339F1012	1	120	120	1	2063	2103	2143
solar	United States	Americas	Northern America	Calverton Solar Energy Center				23	operating	2022		PV						NextEra Energy		40.9137	-72.7504	exact		Suffolk County		New York	https://gem.wiki/Calverton_Solar_Energy_Center	L832763	G838359	US65339F1012	1	23	23	2	2062	2102	2142
solar	United States	Americas	Northern America	Cattle Ranch solar farm				74	operating	2020		PV						NextEra Energy INC		27.3219	-81.8091	exact		DeSoto County		Florida	https://gem.wiki/Cattle_Ranch_solar_farm	L804620	G805335	US65339F1012	1	74	74	4	2060	2100	2140
solar	United States	Americas	Northern America	Cavalry Solar				200	pre-construction	2024		PV						NextEra Energy INC; Northern Indiana Public Service Company LLC (NIPSCO)		40.6304	-79.1446	approximate		White County		Indiana	https://gem.wiki/Cavalry_Solar	L804679	G805394	US65339F1012	0.5	200		0	2064	2104	2144
solar	United States	Americas	Northern America	Cayuga Solar				200	announced	2023		PV						NextEra Energy INC		42.7105	-76.421	approximate		Cayuga County		New York	https://gem.wiki/Cayuga_Solar	L832777	G838374	US65339F1012	1	200	200	1	2063	2103	2143
solar	United States	Americas	Northern America	Cereal City Solar				100	pre-construction	2023		PV						NextEra Energy INC		42.3058	-85.0323	approximate		Calhoun County		Michigan	https://gem.wiki/Cereal_City_Solar	L805176	G805967	US65339F1012	1	100	100	1	2063	2103	2143
solar	United States	Americas	Northern America	Chaves Solar				70	operating	2016		PV						NextEra Energy INC		33.4501	-104.456	exact	Roswell	Chaves County		New Mexico	https://gem.wiki/Chaves_Solar	L804621	G805336	US65339F1012	1	70	70	8	2056	2096	2136
solar	United States	Americas	Northern America	Chesapeake solar farm				118	construction	2023		PV						NextEra Energy INC		39.4564	-77.9663	approximate				Virginia	https://gem.wiki/Chesapeake_solar_farm	L805354	G806184	US65339F1012	1	118	118	1	2063	2103	2143
solar	United States	Americas	Northern America	Chicot Solar			Lake Village	100	operating	2020		PV						NextEra Energy INC		33.479	-91.349	exact		Chicot County		Arkansas	https://gem.wiki/Chicot_Solar	L804622	G805337	US65339F1012	1	100	100	4	2060	2100	2140
solar	United States	Americas	Northern America	Chinook Solar				30	cancelled			PV						NextEra Energy INC		42.7748	-72.1514	approximate	Fitzwilliam			New Hampshire	https://gem.wiki/Chinook_Solar	L805177	G805968	US65339F1012	1	30	30	-99	40	80	120
solar	United States	Americas	Northern America	Citrus Solar Energy Center Hybrid				74	operating	2016		PV						NextEra Energy INC		27.3209	-81.8069	exact		DeSoto County		Florida	https://gem.wiki/Citrus_Solar_Energy_Center_Hybrid	L804623	G805338	US65339F1012	1	74	74	8	2056	2096	2136
solar	United States	Americas	Northern America	Coolidge Solar				19.6	operating	2018		PV						NextEra Energy INC		43.4282	-72.6653	exact	Ludlow	Windsor		Vermont	https://gem.wiki/Coolidge_Solar	L808409	G810609	US65339F1012	1	19.6	19.6	6	2058	2098	2138
solar	United States	Americas	Northern America	Coral Farms Solar Energy Center				74	operating	2018		PV						NextEra Energy INC		29.7569	-81.8972	exact		Putnam County		Florida	https://gem.wiki/Coral_Farms_Solar_Energy_Center	L804624	G805339	US65339F1012	1	74	74	6	2058	2098	2138
solar	United States	Americas	Northern America	Dallas Solar Project				80	pre-construction	2023		PV						NextEra Energy INC		32.4395	-87.0597	approximate		Selma County		Alabama	https://gem.wiki/Dallas_Solar_Project	L805178	G805969	US65339F1012	1	80	80	1	2063	2103	2143
solar	United States	Americas	Northern America	Desert Sunlight 250 solar farm	12			29	operating	2013		PV						Clearway Energy Group [25.0%]; Harbert Power Fund V (HPF V) [24.9%]; NextEra Energy Partners LP [49.9%]; Other [0.2%]		33.8055	-115.395	exact		Riverside County		California	https://gem.wiki/Desert_Sunlight_250_solar_farm	L808416	G810618	US65339F1012	0.499	248.9		11	2053	2093	2133
solar	United States	Americas	Northern America	Desert Sunlight 250 solar farm	13			25	operating	2013		PV						Clearway Energy Group [25.0%]; Harbert Power Fund V (HPF V) [24.9%]; NextEra Energy Partners LP [49.9%]; Other [0.2%]		33.8055	-115.395	exact		Riverside County		California	https://gem.wiki/Desert_Sunlight_250_solar_farm	L808416	G810619	US65339F1012	0.499	248.9		11	2053	2093	2133
solar	United States	Americas	Northern America	Desert Sunlight 250 solar farm	14			23	operating	2013		PV						Clearway Energy Group [25.0%]; Harbert Power Fund V (HPF V) [24.9%]; NextEra Energy Partners LP [49.9%]; Other [0.2%]		33.8055	-115.395	exact		Riverside County		California	https://gem.wiki/Desert_Sunlight_250_solar_farm	L808416	G810620	US65339F1012	0.499	248.9		11	2053	2093	2133
solar	United States	Americas	Northern America	Desert Sunlight 250 solar farm	16			39	operating	2013		PV						Clearway Energy Group [25.0%]; Harbert Power Fund V (HPF V) [24.9%]; NextEra Energy Partners LP [49.9%]; Other [0.2%]		33.8055	-115.395	exact		Riverside County		California	https://gem.wiki/Desert_Sunlight_250_solar_farm	L808416	G810621	US65339F1012	0.499	248.9		11	2053	2093	2133
solar	United States	Americas	Northern America	Desert Sunlight 250 solar farm	17			39	operating	2014		PV						Clearway Energy Group [25.0%]; Harbert Power Fund V (HPF V) [24.9%]; NextEra Energy Partners LP [49.9%]; Other [0.2%]		33.8055	-115.395	exact		Riverside County		California	https://gem.wiki/Desert_Sunlight_250_solar_farm	L808416	G810622	US65339F1012	0.499	248.9		10	2054	2094	2134
solar	United States	Americas	Northern America	Desert Sunlight 250 solar farm	18			26	operating	2014		PV						Clearway Energy Group [25.0%]; Harbert Power Fund V (HPF V) [24.9%]; NextEra Energy Partners LP [49.9%]; Other [0.2%]		33.8055	-115.395	exact		Riverside County		California	https://gem.wiki/Desert_Sunlight_250_solar_farm	L808416	G810623	US65339F1012	0.499	248.9		10	2054	2094	2134
solar	United States	Americas	Northern America	Desert Sunlight 250 solar farm	19			29	operating	2014		PV						Clearway Energy Group [25.0%]; Harbert Power Fund V (HPF V) [24.9%]; NextEra Energy Partners LP [49.9%]; Other [0.2%]		33.8055	-115.395	exact		Riverside County		California	https://gem.wiki/Desert_Sunlight_250_solar_farm	L808416	G810624	US65339F1012	0.499	248.9		10	2054	2094	2134
solar	United States	Americas	Northern America	Desert Sunlight 250 solar farm	20			25	operating	2014		PV						Clearway Energy Group [25.0%]; Harbert Power Fund V (HPF V) [24.9%]; NextEra Energy Partners LP [49.9%]; Other [0.2%]		33.8055	-115.395	exact		Riverside County		California	https://gem.wiki/Desert_Sunlight_250_solar_farm	L808416	G810625	US65339F1012	0.499	248.9		10	2054	2094	2134
solar	United States	Americas	Northern America	Desert Sunlight 250 solar farm	15			13.9	operating	2014		PV						Clearway Energy Group [25.0%]; Harbert Power Fund V (HPF V) [24.9%]; NextEra Energy Partners LP [49.9%]; Other [0.2%]		33.8055	-115.395	exact		Riverside County		California	https://gem.wiki/Desert_Sunlight_250_solar_farm	L808416	G815385	US65339F1012	0.499	248.9	248.9	10	2054	2094	2134
solar	United States	Americas	Northern America	Desert Sunlight 300 solar farm	1			20	operating	2013		PV						Clearway Energy Group [25.0%]; Harbert Power Fund V (HPF V) [24.9%]; NextEra Energy Partners LP [49.9%]; Other [0.2%]		33.8231	-115.394	exact		Riverside County		California	https://gem.wiki/Desert_Sunlight_300_solar_farm	L808417	G810626	US65339F1012	0.499	293		11	2053	2093	2133
solar	United States	Americas	Northern America	Desert Sunlight 300 solar farm	2			30	operating	2013		PV						Clearway Energy Group [25.0%]; Harbert Power Fund V (HPF V) [24.9%]; NextEra Energy Partners LP [49.9%]; Other [0.2%]		33.8231	-115.394	exact		Riverside County		California	https://gem.wiki/Desert_Sunlight_300_solar_farm	L808417	G810627	US65339F1012	0.499	293		11	2053	2093	2133
solar	United States	Americas	Northern America	Desert Sunlight 300 solar farm	3			30	operating	2013		PV						Clearway Energy Group [25.0%]; Harbert Power Fund V (HPF V) [24.9%]; NextEra Energy Partners LP [49.9%]; Other [0.2%]		33.8231	-115.394	exact		Riverside County		California	https://gem.wiki/Desert_Sunlight_300_solar_farm	L808417	G810628	US65339F1012	0.499	293		11	2053	2093	2133
solar	United States	Americas	Northern America	Desert Sunlight 300 solar farm	4			40	operating	2013		PV						Clearway Energy Group [25.0%]; Harbert Power Fund V (HPF V) [24.9%]; NextEra Energy Partners LP [49.9%]; Other [0.2%]		33.8231	-115.394	exact		Riverside County		California	https://gem.wiki/Desert_Sunlight_300_solar_farm	L808417	G810629	US65339F1012	0.499	293		11	2053	2093	2133
solar	United States	Americas	Northern America	Desert Sunlight 300 solar farm	5			40	operating	2013		PV						Clearway Energy Group [25.0%]; Harbert Power Fund V (HPF V) [24.9%]; NextEra Energy Partners LP [49.9%]; Other [0.2%]		33.8231	-115.394	exact		Riverside County		California	https://gem.wiki/Desert_Sunlight_300_solar_farm	L808417	G810630	US65339F1012	0.499	293		11	2053	2093	2133
solar	United States	Americas	Northern America	Desert Sunlight 300 solar farm	6			40	operating	2013		PV						Clearway Energy Group [25.0%]; Harbert Power Fund V (HPF V) [24.9%]; NextEra Energy Partners LP [49.9%]; Other [0.2%]		33.8231	-115.394	exact		Riverside County		California	https://gem.wiki/Desert_Sunlight_300_solar_farm	L808417	G810631	US65339F1012	0.499	293		11	2053	2093	2133
solar	United States	Americas	Northern America	Desert Sunlight 300 solar farm	10			23	operating	2014		PV						Clearway Energy Group [25.0%]; Harbert Power Fund V (HPF V) [24.9%]; NextEra Energy Partners LP [49.9%]; Other [0.2%]		33.8231	-115.394	exact		Riverside County		California	https://gem.wiki/Desert_Sunlight_300_solar_farm	L808417	G810635	US65339F1012	0.499	293		10	2054	2094	2134
solar	United States	Americas	Northern America	Desert Sunlight 300 solar farm	7			25	operating	2014		PV						Clearway Energy Group [25.0%]; Harbert Power Fund V (HPF V) [24.9%]; NextEra Energy Partners LP [49.9%]; Other [0.2%]		33.8231	-115.394	exact		Riverside County		California	https://gem.wiki/Desert_Sunlight_300_solar_farm	L808417	G810632	US65339F1012	0.499	293		10	2054	2094	2134
solar	United States	Americas	Northern America	Desert Sunlight 300 solar farm	8			20	operating	2014		PV						Clearway Energy Group [25.0%]; Harbert Power Fund V (HPF V) [24.9%]; NextEra Energy Partners LP [49.9%]; Other [0.2%]		33.8231	-115.394	exact		Riverside County		California	https://gem.wiki/Desert_Sunlight_300_solar_farm	L808417	G810633	US65339F1012	0.499	293		10	2054	2094	2134
solar	United States	Americas	Northern America	Desert Sunlight 300 solar farm	9			25	operating	2014		PV						Clearway Energy Group [25.0%]; Harbert Power Fund V (HPF V) [24.9%]; NextEra Energy Partners LP [49.9%]; Other [0.2%]		33.8231	-115.394	exact		Riverside County		California	https://gem.wiki/Desert_Sunlight_300_solar_farm	L808417	G810634	US65339F1012	0.499	293	293	10	2054	2094	2134
solar	United States	Americas	Northern America	Desoto Next Generation Solar Energy				25	operating	2009		PV						NextEra Energy INC		27.3232	-81.8019	exact		DeSoto County		Florida	https://gem.wiki/Desoto_Next_Generation_Solar_Energy	L804625	G805340	US65339F1012	1	25	25	15	2049	2089	2129
solar	United States	Americas	Northern America	Discovery Solar Center				74	operating	2021		PV						NextEra Energy INC		28.5289	-80.6789	exact	Titusville	Brevard County		Florida	https://gem.wiki/Discovery_Solar_Center	L804626	G805341	US65339F1012	1	74	74	3	2061	2101	2141
solar	United States	Americas	Northern America	Dodge Flat solar farm				200	operating	2022		PV						NextEra Energy INC		40.713	-119.467	exact	Reno	Washoe County		Nevada	https://gem.wiki/Dodge_Flat_solar_farm	L805179	G805970	US65339F1012	1	200	200	2	2062	2102	2142
solar	United States	Americas	Northern America	Dothan Solar Project			Houston County Solar Project	80	pre-construction	2023		PV						NextEra Energy INC		31.2307	-85.5347	approximate		Houston County		Alabama	https://gem.wiki/Dothan_Solar_Project	L805180	G805971	US65339F1012	1	80	80	1	2063	2103	2143
solar	United States	Americas	Northern America	Dougherty County Solar				120	operating	2019		PV						NextEra Energy INC		31.512	-84.0445	exact		Dougherty County		Georgia	https://gem.wiki/Dougherty_County_Solar	L805181	G805972	US65339F1012	1	120	120	5	2059	2099	2139
solar	United States	Americas	Northern America	Dunns Bridge solar farm	1			265	construction	2024		PV						NextEra Energy INC		41.1939	-86.9847	exact		Jasper County		Indiana	https://gem.wiki/Dunns_Bridge_solar_farm	L805182	G805974	US65339F1012	1	700		0	2064	2104	2144
solar	United States	Americas	Northern America	Dunns Bridge solar farm	2			435	pre-construction	2024		PV						NextEra Energy INC		41.1939	-86.9847	exact		Jasper County		Indiana	https://gem.wiki/Dunns_Bridge_solar_farm	L805182	G805973	US65339F1012	1	700	700	0	2064	2104	2144
solar	United States	Americas	Northern America	East Point Energy solar farm				50	shelved			PV						NextEra Energy INC		42.7569	-74.4928	approximate		Schoharie County		New York	https://gem.wiki/East_Point_Energy_solar_farm	L804627	G805342	US65339F1012	1	50	50	-99	40	80	120
solar	United States	Americas	Northern America	Echo River Solar				74	operating	2020		PV						NextEra Energy INC		30.2962	-82.8643	exact		Suwannee County		Florida	https://gem.wiki/Echo_River_Solar	L804628	G805343	US65339F1012	1	74		4	2060	2100	2140
solar	United States	Americas	Northern America	Egret Solar Center				74	operating	2020		PV						NextEra Energy INC		30.295	-82.186	exact		Baker County		Florida	https://gem.wiki/Egret_Solar_Center	L804629	G805344	US65339F1012	1	74	74	4	2060	2100	2140
solar	United States	Americas	Northern America	Elora Solar				150	operating	2022		PV						NextEra Energy INC		35.0601	-86.34	exact	Elora	Lincoln County		Tennessee	https://gem.wiki/Elora_Solar	L804630	G805345	US65339F1012	1	150	150	2	2062	2102	2142
solar	United States	Americas	Northern America	Eloy Valley Solar Project	1			200	pre-construction	2025		PV						NextEra Energy INC		32.7552	-111.554	approximate		Eloy County		Arizona	https://gem.wiki/Eloy_Valley_Solar_Project	L805365	G806195	US65339F1012	1	450		-1	2065	2105	2145
solar	United States	Americas	Northern America	Eloy Valley Solar Project	2			250	pre-construction	2025		PV						NextEra Energy		32.7283	-111.594	approximate		Pinal County		Arizona	https://gem.wiki/Eloy_Valley_Solar_Project	L805365	G838487	US65339F1012	1	450	450	-1	2065	2105	2145
solar	United States	Americas	Northern America	Esmeralda (NextEra) Solar Energy Center Project				500	pre-construction	2025		PV						NextEra Energy INC		37.8067	-117.642	approximate		Esmeralda County		Nevada	https://gem.wiki/Esmeralda_(NextEra)_Solar_Energy_Center_Project	L805183	G805975	US65339F1012	1	500	500	-1	2065	2105	2145
solar	United States	Americas	Northern America	Excelsior Energy solar farm				280	pre-construction			PV						NextEra Energy INC		43.0884	-75.257	approximate		Genesee County		New York	https://gem.wiki/Excelsior_Energy_solar_farm	L805184	G805976	US65339F1012	1	280	280	-99	40	80	120
solar	United States	Americas	Northern America	Fairfield Route 201 solar farm				20	cancelled			PV						NextEra Energy INC		44.5885	-69.5991	approximate	Fairfield			Maine	https://gem.wiki/Fairfield_Route_201_solar_farm	L805185	G805977	US65339F1012	1	20	20	-99	40	80	120
solar	United States	Americas	Northern America	Farmington Solar				77	operating	2021		PV						NextEra Energy INC		44.6547	-70.1008	exact	Farmington	Franklin County		Maine	https://gem.wiki/Farmington_Solar	L804631	G805346	US65339F1012	1	77	77	3	2061	2101	2141
solar	United States	Americas	Northern America	Fish Springs Ranch solar farm	1			100	operating	2022		PV						NextEra Energy INC		40.0747	-119.974	exact	Reno	Washoe County		Nevada	https://gem.wiki/Fish_Springs_Ranch_solar_farm	L805186	G805978	US65339F1012	1	300		2	2062	2102	2142
solar	United States	Americas	Northern America	Fish Springs Ranch solar farm	2			200	pre-construction			PV						NextEra Energy INC		40.1041	-119.888	approximate		Washoe County		Nevada	https://gem.wiki/Fish_Springs_Ranch_solar_farm	L805186	G810648	US65339F1012	1	300	300	-99	40	80	120
solar	United States	Americas	Northern America	Fort Drum Energy Center solar farm				74	operating	2021		PV						NextEra Energy INC		27.616	-80.791	exact	Vero Beach	Okeechobee County		Florida	https://gem.wiki/Fort_Drum_Energy_Center_solar_farm	L804632	G805347	US65339F1012	1	74	74	3	2061	2101	2141
solar	United States	Americas	Northern America	Garnet Energy Solar			Cayuga Solar	200	pre-construction	2024		PV						NextEra Energy INC		43.1212	-76.648	approximate	Conquest			New York	https://gem.wiki/Garnet_Energy_Solar	L805187	G805979	US65339F1012	1	200	200	0	2064	2104	2144
solar	United States	Americas	Northern America	Genesis Solar Enegy Project	1			125	operating	2013		Solar Thermal						NextEra Energy INC		33.665	-114.998	exact		Riverside County		California	https://gem.wiki/Genesis_Solar_Enegy_Project	L808434	G810655	US65339F1012	1	250		11	2053	2093	2133
solar	United States	Americas	Northern America	Genesis Solar Enegy Project	2			125	operating	2014		Solar Thermal						NextEra Energy INC		33.665	-114.998	exact		Riverside County		California	https://gem.wiki/Genesis_Solar_Enegy_Project	L808434	G810656	US65339F1012	1	250	250	10	2054	2094	2134
solar	United States	Americas	Northern America	Grazing Yak Solar				35	operating	2019		PV						NextEra Energy INC		38.9778	-104.253	exact		El Paso County		Colorado	https://gem.wiki/Grazing_Yak_Solar	L804633	G805348	US65339F1012	1	35	35	5	2059	2099	2139
solar	United States	Americas	Northern America	Green River Solar				200	pre-construction	2025		PV						NextEra Energy INC		37.8771	-86.3072	approximate		Breckinridge County		Kentucky	https://gem.wiki/Green_River_Solar	L808439	G810661	US65339F1012	1	200	200	-1	2065	2105	2145
solar	United States	Americas	Northern America	Greensboro Solar Project				100	pre-construction			PV						NextEra Energy INC		39.9295	-85.3692	approximate		Henry County		Indiana	https://gem.wiki/Greensboro_Solar_Project	L805188	G805980	US65339F1012	1	100		-99	40	80	120
solar	United States	Americas	Northern America	Greenwood Solar			Culpepper Solar	100	pre-construction	2024		PV						NextEra Energy INC		38.4912	-77.9618	approximate		Culpeper County		Virginia	https://gem.wiki/Greenwood_Solar	L805372	G806202	US65339F1012	1	100	100	0	2064	2104	2144
solar	United States	Americas	Northern America	Hammock Solar				74	operating	2018		PV						NextEra Energy INC		26.6926	-81.325	exact		Hendry County		Florida	https://gem.wiki/Hammock_Solar	L804634	G805349	US65339F1012	1	74		6	2058	2098	2138
solar	United States	Americas	Northern America	Harmony (NextEra Energy) Solar	HFS		FMS Harmony Solar	74	operating	2020		PV						NextEra Energy INC		28.1553	-81.1083	exact		Osceola County		Florida	https://gem.wiki/Harmony_(NextEra_Energy)_Solar	L805189	G805981	US65339F1012	1	74		4	2060	2100	2140
solar	United States	Americas	Northern America	Hibiscus Solar Energy Center				74	operating	2020		PV						NextEra Energy INC		26.757	-80.334	exact		Palm Beach County		Florida	https://gem.wiki/Hibiscus_Solar_Energy_Center	L804635	G805350	US65339F1012	1	74	74	4	2060	2100	2140
solar	United States	Americas	Northern America	High River Energy solar farm				90	pre-construction	2024		PV						NextEra Energy INC		42.9019	-74.1327	approximate	Amsterdam	Montgomery County		New York	https://gem.wiki/High_River_Energy_solar_farm	L805190	G805982	US65339F1012	1	90	90	0	2064	2104	2144
solar	United States	Americas	Northern America	Horizon Solar Energy Center				74	operating	2018		PV						NextEra Energy INC		29.6656	-82.0583	exact		Putnam County		Florida	https://gem.wiki/Horizon_Solar_Energy_Center	L804636	G805351	US65339F1012	1	74		6	2058	2098	2138
solar	United States	Americas	Northern America	Indian River Solar Center				74	operating	2018		PV						NextEra Energy INC		27.5733	-80.5782	exact		Indian River County		Florida	https://gem.wiki/Indian_River_Solar_Center	L804637	G805352	US65339F1012	1	74	74	6	2058	2098	2138
solar	United States	Americas	Northern America	INEOS Hickerson solar farm				310	announced	2025		PV						NextEra Energy INC		31.9057	-97.6411	approximate		Bosque County		Texas	https://gem.wiki/INEOS_Hickerson_solar_farm	L832996	G838622	US65339F1012	1	310	310	-1	2065	2105	2145
solar	United States	Americas	Northern America	Interstate Solar Energy Center				74	operating	2019		PV						NextEra Energy INC		27.487	-80.443	exact		Saint Lucie County		Florida	https://gem.wiki/Interstate_Solar_Energy_Center	L804638	G805353	US65339F1012	1	74	74	5	2059	2099	2139
solar	United States	Americas	Northern America	Joshua Tree solar farm				20	cancelled			PV						NextEra Energy INC		34.1265	-116.321	approximate		Joshua Tree County		California	https://gem.wiki/Joshua_Tree_solar_farm	L805382	G806212	US65339F1012	1	20	20	-99	40	80	120
solar	United States	Americas	Northern America	Lakeside Solar Center				74	operating	2020		PV						NextEra Energy INC		27.2142	-80.7446	exact		Okeechobee County		Florida	https://gem.wiki/Lakeside_Solar_Center	L804639	G805354	US65339F1012	1	74	74	4	2060	2100	2140
solar	United States	Americas	Northern America	Live Oak Solar				51	operating	2016		PV						NextEra Energy INC		32.4238	-82.1028	exact		Candler County		Georgia	https://gem.wiki/Live_Oak_Solar	L805191	G805983	US65339F1012	1	51	51	8	2056	2096	2136
solar	United States	Americas	Northern America	Loggerhead Solar Energy Center				74	operating	2018		PV						NextEra Energy INC		27.2378	-80.5414	exact		Saint Lucie County		Florida	https://gem.wiki/Loggerhead_Solar_Energy_Center	L804640	G805355	US65339F1012	1	74	74	6	2058	2098	2138
solar	United States	Americas	Northern America	Lucerne Valley (NextEra) solar farm				60	cancelled			PV						NextEra Energy INC		34.4436	-116.946	approximate		Lucerne Valley County		California	https://gem.wiki/Lucerne_Valley_(NextEra)_solar_farm	L805192	G805984	US65339F1012	1	60	60	-99	40	80	120
solar	United States	Americas	Northern America	Magnolia Solar				74	operating	2021		PV						NextEra Energy INC		27.918	-82.05	exact	Mulberry	Polk County		Florida	https://gem.wiki/Magnolia_Solar	L804827	G805564	US65339F1012	1	74		3	2061	2101	2141
solar	United States	Americas	Northern America	Magnolia Springs Solar Center				74	operating	2021		PV						NextEra Energy INC		29.879	-81.696	exact	Green Cove Springs	Clay County		Florida	https://gem.wiki/Magnolia_Springs_Solar_Center	L804641	G805356	US65339F1012	1	74		3	2061	2101	2141
solar	United States	Americas	Northern America	Manatee Solar Energy Center				74	operating	2016		PV						NextEra Energy INC		27.6075	-82.3553	exact		Manatee County		Florida	https://gem.wiki/Manatee_Solar_Energy_Center	L804642	G805357	US65339F1012	1	74	74	8	2056	2096	2136
solar	United States	Americas	Northern America	Marshall Solar Energy Project				62	operating	2017		PV						NextEra Energy INC		44.4753	-95.669	exact		Lyon County		Minnesota	https://gem.wiki/Marshall_Solar_Energy_Project	L804643	G805358	US65339F1012	1	62	62	7	2057	2097	2137
solar	United States	Americas	Northern America	Mccoy Solar Energy Project Hybrid	4			31	operating	2015		PV						NextEra Energy INC		33.6947	-114.74	exact		Riverside County		California	https://gem.wiki/Mccoy_Solar_Energy_Project_Hybrid	L805193	G805987	US65339F1012	1	270		9	2055	2095	2135
solar	United States	Americas	Northern America	Mccoy Solar Energy Project Hybrid	5			31	operating	2015		PV						NextEra Energy INC		33.6947	-114.74	exact		Riverside County		California	https://gem.wiki/Mccoy_Solar_Energy_Project_Hybrid	L805193	G805986	US65339F1012	1	270		9	2055	2095	2135
solar	United States	Americas	Northern America	Mccoy Solar Energy Project Hybrid	6			27	operating	2015		PV						NextEra Energy INC		33.6947	-114.74	exact		Riverside County		California	https://gem.wiki/Mccoy_Solar_Energy_Project_Hybrid	L805193	G805985	US65339F1012	1	270		9	2055	2095	2135
solar	United States	Americas	Northern America	Mccoy Solar Energy Project Hybrid	8			36	operating	2015		PV						NextEra Energy INC		33.6947	-114.74	exact		Riverside County		California	https://gem.wiki/Mccoy_Solar_Energy_Project_Hybrid	L805193	G805988	US65339F1012	1	270		9	2055	2095	2135
solar	United States	Americas	Northern America	Mccoy Solar Energy Project Hybrid	1			42	operating	2016		PV						NextEra Energy INC		33.6947	-114.74	exact		Riverside County		California	https://gem.wiki/Mccoy_Solar_Energy_Project_Hybrid	L805193	G805992	US65339F1012	1	270		8	2056	2096	2136
solar	United States	Americas	Northern America	Mccoy Solar Energy Project Hybrid	2			21	operating	2016		PV						NextEra Energy INC		33.6947	-114.74	exact		Riverside County		California	https://gem.wiki/Mccoy_Solar_Energy_Project_Hybrid	L805193	G805989	US65339F1012	1	270		8	2056	2096	2136
solar	United States	Americas	Northern America	Mccoy Solar Energy Project Hybrid	3			40	operating	2016		PV						NextEra Energy INC		33.6947	-114.74	exact		Riverside County		California	https://gem.wiki/Mccoy_Solar_Energy_Project_Hybrid	L805193	G805990	US65339F1012	1	270		8	2056	2096	2136
solar	United States	Americas	Northern America	Mccoy Solar Energy Project Hybrid	7			42	operating	2016		PV						NextEra Energy INC		33.6947	-114.74	exact		Riverside County		California	https://gem.wiki/Mccoy_Solar_Energy_Project_Hybrid	L805193	G805991	US65339F1012	1	270	270	8	2056	2096	2136
solar	United States	Americas	Northern America	Miami Dade Solar Energy Center				74	operating	2019		PV						NextEra Energy INC		25.6401	-80.49	exact		Miami-Dade County		Florida	https://gem.wiki/Miami_Dade_Solar_Energy_Center	L804644	G805359	US65339F1012	1	74	74	5	2059	2099	2139
solar	United States	Americas	Northern America	Mountain View (NextEra) solar farm				20	operating	2014		PV						NextEra Energy INC		36.3906	-114.964	exact		Clark County		Nevada	https://gem.wiki/Mountain_View_(NextEra)_solar_farm	L804645	G805360	US65339F1012	1	20	20	10	2054	2094	2134
solar	United States	Americas	Northern America	Nassau Solar Center				74	operating	2020		PV						NextEra Energy INC		30.528	-81.895	exact		Nassau County		Florida	https://gem.wiki/Nassau_Solar_Center	L804646	G805361	US65339F1012	1	74	74	4	2060	2100	2140
solar	United States	Americas	Northern America	Neptune Energy Center Hybrid solar farm				325	construction	2023		PV						NextEra Energy INC		38.3303	-104.414	exact	Boone	Pueblo County		Colorado	https://gem.wiki/Neptune_Energy_Center_Hybrid_solar_farm	L804647	G805362	US65339F1012	1	325	325	1	2063	2103	2143
solar	United States	Americas	Northern America	Northern Preserve Solar				74	operating	2020		PV						NextEra Energy INC		30.232	-82.25	exact		Baker County		Florida	https://gem.wiki/Northern_Preserve_Solar	L804648	G805363	US65339F1012	1	74	74	4	2060	2100	2140
solar	United States	Americas	Northern America	Nutmeg Solar				19.6	operating	2020		PV						NextEra Energy INC		41.9748	-72.5108	exact	Enfield	Hartford		Connecticut	https://gem.wiki/Nutmeg_Solar	L808485	G810713	US65339F1012	1	19.6	19.6	4	2060	2100	2140
solar	United States	Americas	Northern America	Okeechobee Solar				74	operating	2020		PV						NextEra Energy INC		27.6304	-80.7948	exact		Okeechobee County		Florida	https://gem.wiki/Okeechobee_Solar	L804649	G805364	US65339F1012	1	74		4	2060	2100	2140
solar	United States	Americas	Northern America	Orange Blossom Solar Center				74	operating	2021		PV						NextEra Energy INC		27.5969	-80.5707	exact	Vero Beach	Indian River County		Florida	https://gem.wiki/Orange_Blossom_Solar_Center	L804650	G805365	US65339F1012	1	74		3	2061	2101	2141
solar	United States	Americas	Northern America	Palm Bay Solar				74	operating	2021		PV						NextEra Energy INC		27.857	-80.669	exact	Palm Bay	Brevard County		Florida	https://gem.wiki/Palm_Bay_Solar	L804651	G805366	US65339F1012	1	74		3	2061	2101	2141
solar	United States	Americas	Northern America	Pelican Solar Center				74	operating	2021		PV						NextEra Energy INC		27.543	-80.571	exact	Ft. Pierce	St Lucie County		Florida	https://gem.wiki/Pelican_Solar_Center	L804652	G805367	US65339F1012	1	74	74	3	2061	2101	2141
solar	United States	Americas	Northern America	Pinal Central Energy Center Hybrid solar farm				20	operating	2018		PV						NextEra Energy INC		32.8757	-111.551	exact		Pinal County		Arizona	https://gem.wiki/Pinal_Central_Energy_Center_Hybrid_solar_farm	L804653	G805368	US65339F1012	1	20	20	6	2058	2098	2138
solar	United States	Americas	Northern America	Pioneer Trail Solar Energy Center				74	operating	2019		PV						NextEra Energy INC		29.007	-81.098	exact		Volusia County		Florida	https://gem.wiki/Pioneer_Trail_Solar_Energy_Center	L804654	G805369	US65339F1012	1	74	74	5	2059	2099	2139
solar	United States	Americas	Northern America	Poinsett Solar Facility				75	cancelled			PV						NextEra Energy INC		28.0444	-81.1438	approximate		Osceola County		Florida	https://gem.wiki/Poinsett_Solar_Facility	L805194	G805993	US65339F1012	1	75	75	-99	40	80	120
solar	United States	Americas	Northern America	Point Beach Solar				100	operating	2021		PV						NextEra Energy INC		44.2834	-87.5553	exact	Two Creeks	Manitowoc County		Wisconsin	https://gem.wiki/Point_Beach_Solar	L804655	G805370	US65339F1012	1	100	100	3	2061	2101	2141
solar	United States	Americas	Northern America	Proxmia Solar				190	pre-construction	2023		PV						NextEra Energy		37.4004	-121.163	approximate		Stanislaus County		California	https://gem.wiki/Proxmia_Solar	L833193	G838870	US65339F1012	1	190	190	1	2063	2103	2143
solar	United States	Americas	Northern America	Quinebaug Solar				49	operating	2021		PV						NextEra Energy INC		41.7499	-71.9325	exact	Canterbury	Windham County		Connecticut	https://gem.wiki/Quinebaug_Solar	L805195	G805994	US65339F1012	1	49	49	3	2061	2101	2141
solar	United States	Americas	Northern America	Quitman Solar	1			150	operating	2019		PV						NextEra Energy INC		30.849	-83.6433	exact		Brooks County		Georgia	https://gem.wiki/Quitman_Solar	L805196	G805995	US65339F1012	1	300		5	2059	2099	2139
solar	United States	Americas	Northern America	Quitman Solar	2			150	operating	2021		PV						NextEra Energy INC		30.862	-83.6517	exact	Quitman	Brooks County		Georgia	https://gem.wiki/Quitman_Solar	L805196	G806242	US65339F1012	1	300	300	3	2061	2101	2141
solar	United States	Americas	Northern America	Resurgence Solar	1&2			138	pre-construction	2023		PV						NextEra Energy INC		35.0066	-117.545	approximate	Boron	San Bernardino County		California	https://gem.wiki/Resurgence_Solar	L804656	G805371	US65339F1012	1	138	138	1	2063	2103	2143
solar	United States	Americas	Northern America	River Bend Solar				75	operating	2016		PV						NextEra Energy INC		34.8315	-87.8422	exact		Lauderdale County		Alabama	https://gem.wiki/River_Bend_Solar	L804657	G805372	US65339F1012	1	75	75	8	2056	2096	2136
solar	United States	Americas	Northern America	Rodeo Solar Center				74	operating	2021		PV						NextEra Energy INC		27.3206	-81.8102	exact	Arcadia	DeSoto County		Florida	https://gem.wiki/Rodeo_Solar_Center	L804658	G805373	US65339F1012	1	74	74	3	2061	2101	2141
solar	United States	Americas	Northern America	Roswell Solar				70	operating	2016		PV						NextEra Energy INC		33.4529	-104.461	exact	Roswell	Chaves County		New Mexico	https://gem.wiki/Roswell_Solar	L804659	G805374	US65339F1012	1	70	70	8	2056	2096	2136
solar	United States	Americas	Northern America	Route 66 Energy Center solar farm				50	operating	2022		PV						NextEra Energy INC		35.0984	-107.615	exact	San Fidel	Cibola County		New Mexico	https://gem.wiki/Route_66_Energy_Center_solar_farm	L805197	G805996	US65339F1012	1	50	50	2	2062	2102	2142
solar	United States	Americas	Northern America	Sabal Palm Solar Center				74	operating	2021		PV						NextEra Energy INC		26.7827	-80.3526	exact	Loxahatchee	Palm Beach County		Florida	https://gem.wiki/Sabal_Palm_Solar_Center	L804660	G805375	US65339F1012	1	74	74	3	2061	2101	2141
solar	United States	Americas	Northern America	Saint Solar				100	operating	2021		PV						NextEra Energy INC		32.8663	-111.502	exact	Coolidge	Pinal County		Arizona	https://gem.wiki/Saint_Solar	L804661	G805376	US65339F1012	1	100	100	3	2061	2101	2141
solar	United States	Americas	Northern America	Sanford Solar				49	operating	2020		PV						NextEra Energy INC		43.387	-70.711	exact	Sanford	York County		Maine	https://gem.wiki/Sanford_Solar	L805198	G805997	US65339F1012	1	49	49	4	2060	2100	2140
solar	United States	Americas	Northern America	Shafter Solar				20	operating	2015		PV						NextEra Energy INC		35.451	-119.128	exact	Bakersfield	Kern County		California	https://gem.wiki/Shafter_Solar	L804662	G805377	US65339F1012	1	20	20	9	2055	2095	2135
solar	United States	Americas	Northern America	Shaw Creek Solar				75	operating	2019		PV						NextEra Energy INC		33.6747	-81.7544	exact		Aiken County		South Carolina	https://gem.wiki/Shaw_Creek_Solar	L804663	G805378	US65339F1012	1	75	75	5	2059	2099	2139
solar	United States	Americas	Northern America	Silver State Solar Power South	1			26	operating	2015		PV						NextEra Energy INC		35.604	-115.341	exact		Clark County		Nevada	https://gem.wiki/Silver_State_Solar_Power_South	L805199	G805999	US65339F1012	1	260		9	2055	2095	2135
solar	United States	Americas	Northern America	Silver State Solar Power South	2			28	operating	2015		PV						NextEra Energy INC		35.604	-115.341	exact		Clark County		Nevada	https://gem.wiki/Silver_State_Solar_Power_South	L805199	G806000	US65339F1012	1	260		9	2055	2095	2135
solar	United States	Americas	Northern America	Silver State Solar Power South	3			37	operating	2015		PV						NextEra Energy INC		35.604	-115.341	exact		Clark County		Nevada	https://gem.wiki/Silver_State_Solar_Power_South	L805199	G806005	US65339F1012	1	260		9	2055	2095	2135
solar	United States	Americas	Northern America	Silver State Solar Power South	4			36	operating	2016		PV						NextEra Energy INC		35.604	-115.341	exact		Clark County		Nevada	https://gem.wiki/Silver_State_Solar_Power_South	L805199	G806003	US65339F1012	1	260		8	2056	2096	2136
solar	United States	Americas	Northern America	Silver State Solar Power South	5			35	operating	2016		PV						NextEra Energy INC		35.604	-115.341	exact		Clark County		Nevada	https://gem.wiki/Silver_State_Solar_Power_South	L805199	G806001	US65339F1012	1	260		8	2056	2096	2136
solar	United States	Americas	Northern America	Silver State Solar Power South	6			37	operating	2016		PV						NextEra Energy INC		35.604	-115.341	exact		Clark County		Nevada	https://gem.wiki/Silver_State_Solar_Power_South	L805199	G806004	US65339F1012	1	260		8	2056	2096	2136
solar	United States	Americas	Northern America	Silver State Solar Power South	7			35	operating	2016		PV						NextEra Energy INC		35.604	-115.341	exact		Clark County		Nevada	https://gem.wiki/Silver_State_Solar_Power_South	L805199	G806002	US65339F1012	1	260		8	2056	2096	2136
solar	United States	Americas	Northern America	Silver State Solar Power South	8			26	operating	2016		PV						NextEra Energy INC		35.604	-115.341	exact		Clark County		Nevada	https://gem.wiki/Silver_State_Solar_Power_South	L805199	G805998	US65339F1012	1	260	260	8	2056	2096	2136
solar	United States	Americas	Northern America	Skeleton Creek solar farm			Skeleton Creek Energy Center Hybrid	250	pre-construction	2025		PV						NextEra Energy INC		36.5214	-98.0344	approximate	Carrier	Garfield County		Oklahoma	https://gem.wiki/Skeleton_Creek_solar_farm	L805200	G806006	US65339F1012	1	250	250	-1	2065	2105	2145
solar	United States	Americas	Northern America	Solar Electric Generating Station	3			30	retired	1986	2021	Solar Thermal						NextEra Energy INC		35.0069	-117.556	exact		San Bernardino County		California	https://gem.wiki/Solar_Electric_Generating_Station	L808533	G810769	US65339F1012	1	310		38	2026	2066	2106
solar	United States	Americas	Northern America	Solar Electric Generating Station	4			30	retired	1986	2021	Solar Thermal						NextEra Energy INC		35.0122	-117.556	exact		San Bernardino County		California	https://gem.wiki/Solar_Electric_Generating_Station	L808533	G810770	US65339F1012	1	310		38	2026	2066	2106
solar	United States	Americas	Northern America	Solar Electric Generating Station	5			30	retired	1987	2021	Solar Thermal						NextEra Energy INC		35.0195	-117.555	exact		San Bernardino County		California	https://gem.wiki/Solar_Electric_Generating_Station	L808533	G810771	US65339F1012	1	310		37	2027	2067	2107
solar	United States	Americas	Northern America	Solar Electric Generating Station	6			30	retired	1988	2021	Solar Thermal						NextEra Energy INC		35.021	-117.566	exact		San Bernardino County		California	https://gem.wiki/Solar_Electric_Generating_Station	L808533	G810772	US65339F1012	1	310		36	2028	2068	2108
solar	United States	Americas	Northern America	Solar Electric Generating Station	7			30	retired	1988	2021	Solar Thermal						NextEra Energy INC		35.0148	-117.566	exact		San Bernardino County		California	https://gem.wiki/Solar_Electric_Generating_Station	L808533	G810773	US65339F1012	1	310		36	2028	2068	2108
solar	United States	Americas	Northern America	Solar Electric Generating Station	8			80	retired	1989	2021	Solar Thermal						NextEra Energy INC		35.0308	-117.356	exact		San Bernardino County		California	https://gem.wiki/Solar_Electric_Generating_Station	L808533	G810774	US65339F1012	1	310		35	2029	2069	2109
solar	United States	Americas	Northern America	Solar Electric Generating Station	9			80	operating	1990		Solar Thermal						NextEra Energy INC		35.033	-117.338	exact		San Bernardino County		California	https://gem.wiki/Solar_Electric_Generating_Station	L808533	G810775	US65339F1012	1	310	310	34	2030	2070	2110
solar	United States	Americas	Northern America	Sonoran Energy Center solar farm			Sonoran Solar	260	pre-construction	2023		PV						NextEra Energy INC		33.3703	-112.584	approximate	Buckeye			Arizona	https://gem.wiki/Sonoran_Energy_Center_solar_farm	L805201	G806007	US65339F1012	1	260	260	1	2063	2103	2143
solar	United States	Americas	Northern America	Southfork Solar				74	operating	2020		PV						NextEra Energy INC		27.5732	-82.1914	exact		Manatee County		Florida	https://gem.wiki/Southfork_Solar	L804664	G805379	US65339F1012	1	74	74	4	2060	2100	2140
solar	United States	Americas	Northern America	Storey Solar Energy			Storey Energy Center	88	pre-construction	2023		PV						NextEra Energy INC		32.8882	-111.498	approximate	Coolidge	Pinal County		Arizona	https://gem.wiki/Storey_Solar_Energy	L805202	G806008	US65339F1012	1	88	88	1	2063	2103	2143
solar	United States	Americas	Northern America	Stuttgart Solar				81	operating	2018		PV						NextEra Energy INC		34.4397	-91.44	exact		Arkansas County		Arkansas	https://gem.wiki/Stuttgart_Solar	L804461	G805128	US65339F1012	1	81	81	6	2058	2098	2138
solar	United States	Americas	Northern America	Sunshine Gateway Solar Energy Center				74	operating	2019		PV						NextEra Energy INC		30.28	-82.778	exact		Columbia County		Florida	https://gem.wiki/Sunshine_Gateway_Solar_Energy_Center	L804665	G805380	US65339F1012	1	74		5	2059	2099	2139
solar	United States	Americas	Northern America	Sweetbay Solar Center				74	operating	2020		PV						NextEra Energy INC		27.0601	-80.4745	exact		Martin County		Florida	https://gem.wiki/Sweetbay_Solar_Center	L804666	G805381	US65339F1012	1	74	74	4	2060	2100	2140
solar	United States	Americas	Northern America	Talladega Solar Project				80	pre-construction	2023		PV						NextEra Energy INC		33.3967	-86.1597	approximate		Talladega County		Alabama	https://gem.wiki/Talladega_Solar_Project	L805203	G806009	US65339F1012	1	80	80	1	2063	2103	2143
solar	United States	Americas	Northern America	Taylor Creek Solar			FMS Taylor Creek	74	operating	2020		PV						NextEra Energy INC		28.5035	-81.0483	exact		Orange County		Florida	https://gem.wiki/Taylor_Creek_Solar	L805204	G806010	US65339F1012	1	74	74	4	2060	2100	2140
solar	Spain	Europe	Southern Europe	Termosol 1 CSP solar farm				49.9	operating	2013		Solar Thermal						NextEra Energy; FPL Energy		39.192	-5.5864	exact		Miajadas	Badajoz	Extremadura	https://gem.wiki/Termosol_1_CSP_solar_farm	L824898	G828149	US65339F1012	0.5	49.9		11	2053	2093	2133
solar	Spain	Europe	Southern Europe	Termosol 2 CSP solar farm				49.9	operating	2013		Solar Thermal						NextEra Energy; FPL Energy		39.1748	-5.5979	exact		Miajadas	Cáceres	Extremadura	https://gem.wiki/Termosol_2_CSP_solar_farm	L824899	G828150	US65339F1012	0.5	49.9	49.9	11	2053	2093	2133
solar	United States	Americas	Northern America	Thunder Wolf Energy Center Hybrid solar farm				248	operating	2023		PV						NextEra Energy INC		38.1899	-104.398	exact	Avondale	Pueblo County		Colorado	https://gem.wiki/Thunder_Wolf_Energy_Center_Hybrid_solar_farm	L805205	G806011	US65339F1012	1	248	248	1	2063	2103	2143
solar	United States	Americas	Northern America	Titan (Colorado) solar farm				50	operating	2018		PV						NextEra Energy INC		39.6865	-104.014	exact		Arapahoe County		Colorado	https://gem.wiki/Titan_(Colorado)_solar_farm	L805206	G806012	US65339F1012	1	50	50	6	2058	2098	2138
solar	United States	Americas	Northern America	Titan (Texas) Solar Project			Titan Culberson	260	operating	2021		PV						NextEra Energy INC		31.7004	-104.458	exact	Van Horn	Culberson County		Texas	https://gem.wiki/Titan_(Texas)_Solar_Project	L805207	G806013	US65339F1012	1	260	260	3	2061	2101	2141
solar	United States	Americas	Northern America	Trailside Solar Center				74	operating	2020		PV						NextEra Energy INC		29.775	-81.4279	exact		Saint Johns County		Florida	https://gem.wiki/Trailside_Solar_Center	L804667	G805382	US65339F1012	1	74	74	4	2060	2100	2140
solar	United States	Americas	Northern America	Trelina Solar				80	pre-construction			PV						NextEra Energy INC		42.893	-76.948	approximate	Waterloo	Seneca County		New York	https://gem.wiki/Trelina_Solar	L805430	G806262	US65339F1012	1	80	80	-99	40	80	120
solar	United States	Americas	Northern America	Twin Lakes solar farm				74	operating	2020		PV						NextEra Energy INC		29.6122	-81.8445	exact		Putnam County		Florida	https://gem.wiki/Twin_Lakes_solar_farm	L804668	G805383	US65339F1012	1	74		4	2060	2100	2140
solar	United States	Americas	Northern America	Union Springs Solar Center				74	operating	2020		PV						NextEra Energy INC		30.001	-82.299	exact		Union County		Florida	https://gem.wiki/Union_Springs_Solar_Center	L804669	G805384	US65339F1012	1	74	74	4	2060	2100	2140
solar	United States	Americas	Northern America	Valley Farms Solar				200	pre-construction	2023		PV						NextEra Energy INC		32.8966	-111.756	approximate	Pinal			Arizona	https://gem.wiki/Valley_Farms_Solar	L805208	G806014	US65339F1012	1	200	200	1	2063	2103	2143
solar	United States	Americas	Northern America	Waco Solar				400	construction	2024		PV						NextEra Energy		31.7104	-96.8187	exact		Limestone County		Texas	https://gem.wiki/Waco_Solar	L833370	G839095	US65339F1012	1	400	400	0	2064	2104	2144
solar	United States	Americas	Northern America	Wadley Solar				260	construction	2024		PV						NextEra Energy INC		32.8666	-82.4041	approximate		Jefferson County		Georgia	https://gem.wiki/Wadley_Solar	L808546	G810790	US65339F1012	1	260	260	0	2064	2104	2144
solar	United States	Americas	Northern America	Wagon Trail Solar				500	pre-construction			PV						NextEra Energy INC		45.3609	-119.605	approximate		Morrow County		Oregon	https://gem.wiki/Wagon_Trail_Solar	L805209	G806015	US65339F1012	1	500	500	-99	40	80	120
solar	United States	Americas	Northern America	West Gardner Solar				320	pre-construction	2024		PV						NextEra Energy INC		38.81	-95.035	approximate		Johnson County		Kansas	https://gem.wiki/West_Gardner_Solar	L805210	G806016	US65339F1012	1	320	320	0	2064	2104	2144
solar	United States	Americas	Northern America	West Memphis Solar				180	announced	2024		PV						NextEra Energy INC		35.1569	-90.3105	approximate		Crittenden County		Arkansas	https://gem.wiki/West_Memphis_Solar	L808552	G810796	US65339F1012	1	180	180	0	2064	2104	2144
solar	United States	Americas	Northern America	Westside (NextEra) solar farm				20	operating	2017		PV						NextEra Energy INC		36.3818	-120.135	exact		Fresno County		California	https://gem.wiki/Westside_(NextEra)_solar_farm	L804670	G805385	US65339F1012	1	20	20	7	2057	2097	2137
solar	United States	Americas	Northern America	Wheatridge Hybrid solar farm			Wheatridge Renewable	50	operating	2022		PV						NextEra Energy INC		45.557	-119.612	exact	Morrow	Morrow County		Oregon	https://gem.wiki/Wheatridge_Hybrid_solar_farm	L804671	G805386	US65339F1012	1	50	50	2	2062	2102	2142
solar	United States	Americas	Northern America	White Oak Solar				76	operating	2016		PV						NextEra Energy INC		33.0368	-82.1113	exact		Burke County		Georgia	https://gem.wiki/White_Oak_Solar	L805211	G806017	US65339F1012	1	76	76	8	2056	2096	2136
solar	United States	Americas	Northern America	White Pine Solar				101	operating	2016		PV						NextEra Energy INC		32.506	-84.257	exact		Taylor County		Georgia	https://gem.wiki/White_Pine_Solar	L804672	G805387	US65339F1012	1	101	101	8	2056	2096	2136
solar	United States	Americas	Northern America	Whitney Point Solar				20	operating	2017		PV						NextEra Energy INC		36.3769	-120.138	exact		Fresno County		California	https://gem.wiki/Whitney_Point_Solar	L804673	G805388	US65339F1012	1	20	20	7	2057	2097	2137
solar	United States	Americas	Northern America	Wildflower Solar Energy Center				74	operating	2018		PV						NextEra Energy INC		27.3162	-81.7839	exact		DeSoto County		Florida	https://gem.wiki/Wildflower_Solar_Energy_Center	L804674	G805389	US65339F1012	1	74		6	2058	2098	2138
solar	United States	Americas	Northern America	Willow Solar Energy Center				74	operating	2021		PV						NextEra Energy INC		27.4481	-82.0807	exact	Myakka City	Manatee County		Florida	https://gem.wiki/Willow_Solar_Energy_Center	L804675	G805390	US65339F1012	1	74	74	3	2061	2101	2141
solar	United States	Americas	Northern America	Wilmot Energy Center solar farm			Wilmot West Grant	130	operating	2021		PV						NextEra Energy INC		32.0435	-110.893	exact	Tucson	Pima County		Arizona	https://gem.wiki/Wilmot_Energy_Center_solar_farm	L804676	G805391	US65339F1012	1	130	130	3	2061	2101	2141
solar	United States	Americas	Northern America	Winslow solar farm				20	cancelled			PV						NextEra Energy INC		44.6378	-69.5031	approximate	Clinton			Maine	https://gem.wiki/Winslow_solar_farm	L805212	G806018	US65339F1012	1	20	20	-99	40	80	120
solar	United States	Americas	Northern America	Yellow Pine Solar Project	1			125	operating	2023		PV						NextEra Energy INC		36.0661	-115.775	exact		Clarke County		Nevada	https://gem.wiki/Yellow_Pine_Solar_Project	L805435	G806267	US65339F1012	1	125	125	1	2063	2103	2143
solar	United States	Americas	Northern America	Yum Yum Solar				147	construction	2024		PV						Invenergy; NextEra Energy		35.2525	-89.2514	exact	Yum Yum	Fayette County		Tennessee	https://gem.wiki/Yum_Yum_Solar	L804561	G805246	US65339F1012	0.5	147	147	0	2064	2104	2144
wind	Canada	Americas	Northern America	Adelaide Wind Energy Centre			Adelaide Nextera wind farm	60	operating	2014		onshore						NextEra Energy INC		43.0203	-81.7131	exact	Adelaide Metcalfe	Middlesex County	Southwestern Ontario	Ontario	https://gem.wiki/Adelaide_Wind_Energy_Centre	L906735	G909071	US65339F1012	1	60	60	10	2054	2094	2134
wind	United States	Americas	Northern America	Appaloosa Run Wind	1			172	operating	2022		onshore						NextEra Energy INC		31.1599	-101.873	exact		Upton County		Texas	https://gem.wiki/Appaloosa_Run_Wind	L907142	G909622	US65339F1012	1	172	172	2	2062	2102	2142
wind	United States	Americas	Northern America	Ashtabula Wind Center	1		FPL Energy Ashtabula Wind	196	operating	2008		onshore						NextEra Energy INC		47.0695	-97.8848	exact		Barnes County		North Dakota	https://gem.wiki/Ashtabula_Wind_Center	L906762	G909871	US65339F1012	1	196	196	16	2048	2088	2128
wind	United States	Americas	Northern America	Babbitt Ranch Wind Project	1			161	construction	2024		onshore						NextEra Energy INC		35.6277	-111.868	exact		Coconino County		Arizona	https://gem.wiki/Babbitt_Ranch_Wind_Project	L907263	G909785	US65339F1012	1	161	161	0	2064	2104	2144
wind	United States	Americas	Northern America	Baldwin Wind Energy Center	1			102	retired	2010	2020	onshore						NextEra Energy INC		47.0783	-100.657	exact		Burleigh County		North Dakota	https://gem.wiki/Baldwin_Wind_Energy_Center	L907045	G909472	US65339F1012	1	204		14	2050	2090	2130
wind	United States	Americas	Northern America	Baldwin Wind Energy Center	RP			102	operating	2020		onshore						NextEra Energy INC		47.0783	-100.657	exact					https://gem.wiki/Baldwin_Wind_Energy_Center	L907045	G927235	US65339F1012	1	204	204	4	2060	2100	2140
wind	United States	Americas	Northern America	Blackwell wind farm	1		Cowboy Wind Farm, Nextera-Blackwell	60	operating	2012		onshore						NextEra Energy INC		36.8646	-97.4251	exact		Kay County		Oklahoma	https://gem.wiki/Blackwell_wind_farm	L906732	G909068	US65339F1012	1	60	60	12	2052	2092	2132
wind	United States	Americas	Northern America	Blue Summit wind farm	1			135	operating	2012		onshore						NextEra Energy INC		34.3486	-99.3892	exact		Wilbarger County		Texas	https://gem.wiki/Blue_Summit_wind_farm	L906972	G909627	US65339F1012	1	434		12	2052	2092	2132
wind	United States	Americas	Northern America	Blue Summit wind farm	2			99	operating	2018		onshore						NextEra Energy INC		34.2054	-99.4781	exact		Hardeman County		Texas	https://gem.wiki/Blue_Summit_wind_farm	L906972	G909386	US65339F1012	1	434		6	2058	2098	2138
wind	United States	Americas	Northern America	Blue Summit wind farm	3			200	operating	2019		onshore						NextEra Energy INC		34.1569	-99.5354	exact		Hardeman County		Texas	https://gem.wiki/Blue_Summit_wind_farm	L906972	G909977	US65339F1012	1	434	434	5	2059	2099	2139
wind	United States	Americas	Northern America	Bluff Point Wind Facility	1			120	operating	2017		onshore						NextEra Energy INC		40.3029	-84.9315	exact		Randolph County		Indiana	https://gem.wiki/Bluff_Point_Wind_Facility	L907093	G909550	US65339F1012	1	120	120	7	2057	2097	2137
wind	United States	Americas	Northern America	Borderlands wind farm	1			100	operating	2021		onshore						NextEra Energy INC		34.1031	-108.908	exact		Catron County		New Mexico	https://gem.wiki/Borderlands_wind_farm	L906976	G909390	US65339F1012	1	100	100	3	2061	2101	2141
wind	Canada	Americas	Northern America	Bornish Wind Energy Centre				73	operating	2014		onshore						NextEra Energy INC		43.138	-81.7381	exact	North Middlesex	Middlesex County	Southwestern Ontario	Ontario	https://gem.wiki/Bornish_Wind_Energy_Centre	L906813	G909171	US65339F1012	1	73	73	10	2054	2094	2134
wind	United States	Americas	Northern America	Brady wind farm	1			150	operating	2016		onshore						NextEra Energy INC		46.6851	-102.636	exact		Stark County		North Dakota	https://gem.wiki/Brady_wind_farm	L907181	G909691	US65339F1012	1	299		8	2056	2096	2136
wind	United States	Americas	Northern America	Brady wind farm	2			149	operating	2016		onshore						NextEra Energy INC		46.6272	-102.839	exact		Hettinger County		North Dakota	https://gem.wiki/Brady_wind_farm	L907181	G909679	US65339F1012	1	299	299	8	2056	2096	2136
wind	United States	Americas	Northern America	Breckinridge wind farm	1			98	operating	2015		onshore						NextEra Energy INC		36.4496	-97.6273	exact		Garfield County		Oklahoma	https://gem.wiki/Breckinridge_wind_farm	L906934	G909334	US65339F1012	1	98	98	9	2055	2095	2135
wind	United States	Americas	Northern America	Bronco Plains wind farm	1			299	operating	2020		onshore						NextEra Energy INC		39.0463	-102.944	exact		Kit Carson County		Colorado	https://gem.wiki/Bronco_Plains_wind_farm	L907561	G910197	US65339F1012	1	499		4	2060	2100	2140
wind	United States	Americas	Northern America	Bronco Plains wind farm	2			200	announced			onshore						NextEra Energy INC		39.184	-102.97	approximate					https://gem.wiki/Bronco_Plains_wind_farm	L907561	G927240	US65339F1012	1	499	499	-99	40	80	120
wind	United States	Americas	Northern America	Brookfield Tehachapi wind farm	1		Coram Wind	102	operating	2012		onshore						NextEra Energy INC		35.0644	-118.335	exact		Kern County		California	https://gem.wiki/Brookfield_Tehachapi_wind_farm	L906439	G909464	US65339F1012	1	102	102	12	2052	2092	2132
wind	United States	Americas	Northern America	Buffalo Ridge Windplant WPP 1993	1			22	retired	1994	2016	onshore						NextEra Energy INC		44.2168	-96.2372	exact		Lincoln County		Minnesota	https://gem.wiki/Buffalo_Ridge_Windplant_WPP_1993	L906456	G908736	US65339F1012	1	131		30	2034	2074	2114
wind	United States	Americas	Northern America	Buffalo Ridge Windplant WPP 1993	RP1			109	operating	2022		onshore						NextEra Energy INC		44.2169	-96.2454	exact		Lincoln County		Minnesota	https://gem.wiki/Buffalo_Ridge_Windplant_WPP_1993	L906456	G909515	US65339F1012	1	131	131	2	2062	2102	2142
wind	United States	Americas	Northern America	Butler Ridge wind farm	1			54	operating	2009		onshore						NextEra Energy INC		43.4023	-88.4777	exact		Dodge County		Wisconsin	https://gem.wiki/Butler_Ridge_wind_farm	L906713	G909041	US65339F1012	1	54	54	15	2049	2089	2129
wind	United States	Americas	Northern America	Cabazon wind farm	2		Cabazon Wind Partners	41	operating	2002		onshore						NextEra Energy INC		33.9166	-116.729	exact		Riverside County		California	https://gem.wiki/Cabazon_wind_farm	L906602	G908926	US65339F1012	1	41	41	22	2042	2082	2122
wind	United States	Americas	Northern America	Callahan Divide wind farm	1			114	retired	2005	2017	onshore						NextEra Energy INC		32.3075	-100.029	exact		Taylor County		Texas	https://gem.wiki/Callahan_Divide_wind_farm	L907082	G909535	US65339F1012	1	228		19	2045	2085	2125
wind	United States	Americas	Northern America	Callahan Divide wind farm	RP			114	operating	2017		onshore						NextEra Energy INC		32.3075	-100.029	exact					https://gem.wiki/Callahan_Divide_wind_farm	L907082	G927243	US65339F1012	1	228	228	7	2057	2097	2137
wind	United States	Americas	Northern America	Capricorn Ridge Wind Energy Center	1A			214	retired	2007	2017	onshore						NextEra Energy INC		31.8627	-100.927	exact	Sterling City	Sterling County		Texas	https://gem.wiki/Capricorn_Ridge_Wind_Energy_Center	L907079	G910052	US65339F1012	1	1322		17	2047	2087	2127
wind	United States	Americas	Northern America	Capricorn Ridge Wind Energy Center	1B			150	retired	2007	2017	onshore						NextEra Energy INC		31.8627	-100.927	exact	Sterling City	Sterling County		Texas	https://gem.wiki/Capricorn_Ridge_Wind_Energy_Center	L907079	G909688	US65339F1012	1	1322		17	2047	2087	2127
wind	United States	Americas	Northern America	Capricorn Ridge Wind Energy Center	2A			186	retired	2008	2017	onshore						NextEra Energy INC		31.9281	-100.964	exact		Sterling County		Texas	https://gem.wiki/Capricorn_Ridge_Wind_Energy_Center	L907079	G909856	US65339F1012	1	1322		16	2048	2088	2128
wind	United States	Americas	Northern America	Capricorn Ridge Wind Energy Center	2B			112	retired	2008	2017	onshore						NextEra Energy INC		31.9281	-100.964	exact		Sterling County		Texas	https://gem.wiki/Capricorn_Ridge_Wind_Energy_Center	L907079	G909531	US65339F1012	1	1322		16	2048	2088	2128
wind	United States	Americas	Northern America	Capricorn Ridge Wind Energy Center	RP1			362	operating	2017		onshore						NextEra Energy		31.8627	-100.927	exact					https://gem.wiki/Capricorn_Ridge_Wind_Energy_Center	L907079	G927244	US65339F1012	1	1322		7	2057	2097	2137
wind	United States	Americas	Northern America	Capricorn Ridge Wind Energy Center	RP2			298	operating	2017		onshore						NextEra Energy		31.9281	-100.964	exact					https://gem.wiki/Capricorn_Ridge_Wind_Energy_Center	L907079	G927245	US65339F1012	1	1322	1322	7	2057	2097	2137
wind	United States	Americas	Northern America	Carousel wind farm	1			150	operating	2015		onshore						NextEra Energy INC		39.3384	-102.15	exact		Kit Carson County		Colorado	https://gem.wiki/Carousel_wind_farm	L907189	G909689	US65339F1012	1	150	150	9	2055	2095	2135
wind	United States	Americas	Northern America	Casa Mesa wind farm	1			51	operating	2018		onshore						NextEra Energy INC		34.6308	-103.976	exact		Quay County		New Mexico	https://gem.wiki/Casa_Mesa_wind_farm	L906702	G909025	US65339F1012	1	51	51	6	2058	2098	2138
wind	Canada	Americas	Northern America	Cedar Point 2 wind farm			Cedar Point Lambton wind farm	100	operating	2015		onshore						NextEra Energy INC		43.1682	-81.9434	exact	Lambton Shores	Lambton County	Southwestern Ontario	Ontario	https://gem.wiki/Cedar_Point_2_wind_farm	L906977	G909391	US65339F1012	1	100	100	9	2055	2095	2135
wind	United States	Americas	Northern America	Cedar Springs wind farm	1			199	operating	2020		onshore						NextEra Energy INC		43.1283	-105.462	exact		Converse County		Wyoming	https://gem.wiki/Cedar_Springs_wind_farm	L907140	G909892	US65339F1012	1	332		4	2060	2100	2140
wind	United States	Americas	Northern America	Cedar Springs wind farm	3			133	operating	2020		onshore						NextEra Energy INC		43.0693	-105.57	exact		Converse County		Wyoming	https://gem.wiki/Cedar_Springs_wind_farm	L907140	G909620	US65339F1012	1	332	332	4	2060	2100	2140
wind	United States	Americas	Northern America	Cerro Gordo wind farm	1		Hawkeye Power, Clear Lake	41	retired	1999	2020	onshore						NextEra Energy INC		43.0789	-93.4765	exact		Cerro Gordo County		Iowa	https://gem.wiki/Cerro_Gordo_wind_farm	L906624	G908930	US65339F1012	1	83		25	2039	2079	2119
wind	United States	Americas	Northern America	Cerro Gordo wind farm	RP1		Hawkeye Power, Clear Lake	42	operating	2020		onshore						NextEra Energy INC		43.0548	-93.4482	exact		Cerro Gordo County		Iowa	https://gem.wiki/Cerro_Gordo_wind_farm	L906624	G908934	US65339F1012	1	83	83	4	2060	2100	2140
wind	United States	Americas	Northern America	Cimarron I wind farm	1			166	operating	2012		onshore						NextEra Energy INC		37.8641	-100.235	exact		Gray County		Kansas	https://gem.wiki/Cimarron_I_wind_farm	L907277	G909804	US65339F1012	1	166	166	12	2052	2092	2132
wind	United States	Americas	Northern America	Clearwater wind farm	1			365	operating	2022		onshore						NextEra Energy INC; Portland General Electric (PGE)		46.8142	-106.349	exact	Rock Springs	Rosebud County		Montana	https://gem.wiki/Clearwater_wind_farm	L907682	G910340	US65339F1012	0.5	676		2	2062	2102	2142
wind	United States	Americas	Northern America	Clearwater wind farm	2			103	pre-construction	2023		onshore						NextEra Energy INC; Portland General Electric (PGE)		46.8188	-106.195	approximate					https://gem.wiki/Clearwater_wind_farm	L907682	G927253	US65339F1012	0.5	676		1	2063	2103	2143
wind	United States	Americas	Northern America	Clearwater wind farm	3			208	pre-construction	2023		onshore						NextEra Energy INC; Portland General Electric (PGE)		46.7896	-106.002	approximate					https://gem.wiki/Clearwater_wind_farm	L907682	G927254	US65339F1012	0.5	676	676	1	2063	2103	2143
wind	United States	Americas	Northern America	Cottonwood wind farm	1			90	operating	2017		onshore						NextEra Energy INC		40.2723	-98.3745	exact		Webster County		Nebraska	https://gem.wiki/Cottonwood_wind_farm	L906906	G909299	US65339F1012	1	90	90	7	2057	2097	2137
wind	United States	Americas	Northern America	Crowned Ridge Wind Project	1			200	operating	2019		onshore						NextEra Energy INC		45.0816	-97.0107	exact		Codington County		South Dakota	https://gem.wiki/Crowned_Ridge_Wind_Project	L907404	G909971	US65339F1012	1	200	200	5	2059	2099	2139
wind	United States	Americas	Northern America	Crystal Lake wind farm	1			150	retired	2008	2019	onshore						NextEra Energy INC		43.2071	-93.8631	exact		Hancock County		Iowa	https://gem.wiki/Crystal_Lake_wind_farm	L906778	G909709	US65339F1012	1	512		16	2048	2088	2128
wind	United States	Americas	Northern America	Crystal Lake wind farm	2			200	retired	2009	2019	onshore						NextEra Energy INC		43.3194	-93.7071	exact		Winnebago County		Iowa	https://gem.wiki/Crystal_Lake_wind_farm	L906778	G909921	US65339F1012	1	512		15	2049	2089	2129
wind	United States	Americas	Northern America	Crystal Lake wind farm	RP1			162	operating	2020		onshore						NextEra Energy INC		43.2071	-93.8631	exact		Hancock County		Iowa	https://gem.wiki/Crystal_Lake_wind_farm	L906778	G909793	US65339F1012	1	512	512	4	2060	2100	2140
wind	United States	Americas	Northern America	Day County Wind Project	1			99	retired	2010	2020	onshore						NextEra Energy INC		45.2743	-97.917	exact		Day County		South Dakota	https://gem.wiki/Day_County_Wind_Project	L906952	G909357	US65339F1012	1	304		14	2050	2090	2130
wind	United States	Americas	Northern America	Day County Wind Project	RP			106	operating	2020		onshore						NextEra Energy INC		45.2743	-97.917	exact					https://gem.wiki/Day_County_Wind_Project	L906952	G927263	US65339F1012	1	304		4	2060	2100	2140
wind	United States	Americas	Northern America	Day County Wind Project	2			99	cancelled			onshore						NextEra Energy INC		45.3779	-97.8349	approximate		Day County		South Dakota	https://gem.wiki/Day_County_Wind_Project	L906952	G909358	US65339F1012	1	304	304	-99	40	80	120
wind	United States	Americas	Northern America	Delaware Mountain Wind Energy Center	1			28	retired	1999	2014	onshore						NextEra Energy INC		31.6476	-104.751	exact		Culberson County		Texas	https://gem.wiki/Delaware_Mountain_Wind_Energy_Center	L906524	G908812	US65339F1012	1	28	28	25	2039	2079	2119
wind	United States	Americas	Northern America	Dodge County wind farm	1			260	announced	2024		onshore						NextEra Energy INC		44.0056	-92.9504	exact		Dodge County		Minnesota	https://gem.wiki/Dodge_County_wind_farm	L907285	G909818	US65339F1012	1	260	260	0	2064	2104	2144
wind	Canada	Americas	Northern America	East Durham wind farm				22	operating	2015		onshore						NextEra Energy INC		44.1894	-80.6416	exact	West Grey	Grey County	Southwestern Ontario	Ontario	https://gem.wiki/East_Durham_wind_farm	L906461	G908741	US65339F1012	1	22	22	9	2055	2095	2135
wind	United States	Americas	Northern America	Edmondson Ranch Wind Project	1		Lacy Creek Wind Energy Center	301	operating	2022		onshore						NextEra Energy INC		31.7373	-101.263	exact	Sterling City	Glasscock County		Texas	https://gem.wiki/Edmondson_Ranch_Wind_Project	L907546	G910180	US65339F1012	1	301	301	2	2062	2102	2142
wind	United States	Americas	Northern America	Eight Point wind farm	1			102	operating	2023		onshore						NextEra Energy INC		42.1016	-77.7011	exact	Greenwood	Steuben County		New York	https://gem.wiki/Eight_Point_wind_farm	L907036	G909460	US65339F1012	1	102	102	1	2063	2103	2143
wind	United States	Americas	Northern America	Elk City wind farm	1			99	operating	2009		onshore						NextEra Energy INC		35.4755	-99.8888	exact		Roger Mills County		Oklahoma	https://gem.wiki/Elk_City_wind_farm	L906939	G909339	US65339F1012	1	200		15	2049	2089	2129
wind	United States	Americas	Northern America	Elk City wind farm	2			101	operating	2010		onshore						NextEra Energy INC		35.4985	-99.6587	exact		Roger Mills County		Oklahoma	https://gem.wiki/Elk_City_wind_farm	L906939	G909451	US65339F1012	1	200	200	14	2050	2090	2130
wind	United States	Americas	Northern America	Emmons Logan wind farm	1			216	operating	2019		onshore						NextEra Energy INC		46.4019	-99.9074	exact		Logan County		North Dakota	https://gem.wiki/Emmons_Logan_wind_farm	L907455	G910057	US65339F1012	1	216	216	5	2059	2099	2139
wind	United States	Americas	Northern America	Endeavor wind farm	1		Osceola windpower LLC	100	retired	2008	2019	onshore						NextEra Energy INC		43.3891	-95.4025	exact		Osceola County		Iowa	https://gem.wiki/Endeavor_wind_farm	L906676	G909397	US65339F1012	1	300		16	2048	2088	2128
wind	United States	Americas	Northern America	Endeavor wind farm	2		Osceola windpower II	50	retired	2008	2019	onshore						NextEra Energy INC		43.4323	-95.4567	exact		Osceola County		Iowa	https://gem.wiki/Endeavor_wind_farm	L906676	G908997	US65339F1012	1	300		16	2048	2088	2128
wind	United States	Americas	Northern America	Endeavor wind farm	RP			150	operating	2019		onshore						NextEra Energy INC		43.3891	-95.4025	exact		Osceola County		Iowa	https://gem.wiki/Endeavor_wind_farm	L906676	G927268	US65339F1012	1	300	300	5	2059	2099	2139
wind	United States	Americas	Northern America	Enron Earth Smart wind farm	1		Green Power I, Green Power Enron, Helzel & Schwarzhoff 88	16	operating	1999		onshore						NextEra Energy INC		33.9167	-116.56	exact	Palm Springs	Riverside County		California	https://gem.wiki/Enron_Earth_Smart_wind_farm	L906367	G908637	US65339F1012	1	16	16	25	2039	2079	2119
wind	United States	Americas	Northern America	Ensign wind farm	1			99	operating	2012		onshore						NextEra Energy INC		37.6145	-100.285	exact		Gray County		Kansas	https://gem.wiki/Ensign_wind_farm	L906940	G909340	US65339F1012	1	99	99	12	2052	2092	2132
wind	United States	Americas	Northern America	Gage Wind Project	1			124	shelved			onshore						NextEra Energy INC		40.4197	-96.663	approximate	Pickrell	Gage County		Nebraska	https://gem.wiki/Gage_Wind_Project	L907117	G909583	US65339F1012	1	124	124	-99	40	80	120
wind	Canada	Americas	Northern America	Ghost Pine wind farm				82	operating	2010		onshore						NextEra Energy INC		51.9344	-113.433	exact		Kneehill County		Alberta	https://gem.wiki/Ghost_Pine_wind_farm	L906892	G909282	US65339F1012	1	82	82	14	2050	2090	2130
wind	United States	Americas	Northern America	Golden Hills (California) wind farm	1			86	operating	2015		onshore						NextEra Energy INC		37.7187	-121.649	exact		Alameda County		California	https://gem.wiki/Golden_Hills_(California)_wind_farm	L921940	G927281	US65339F1012	1	132		9	2055	2095	2135
wind	United States	Americas	Northern America	Golden Hills (California) wind farm	2		Golden Hills II	46	operating	2017		onshore						NextEra Energy INC		37.7464	-121.616	exact		Alameda County		California	https://gem.wiki/Golden_Hills_(California)_wind_farm	L921940	G927282	US65339F1012	1	132	132	7	2057	2097	2137
wind	United States	Americas	Northern America	Golden West wind farm	1			249	operating	2015		onshore						NextEra Energy INC		38.9244	-104.224	exact		El Paso County		Colorado	https://gem.wiki/Golden_West_wind_farm	L907496	G910121	US65339F1012	1	249	249	9	2055	2095	2135
wind	Canada	Americas	Northern America	Goshen wind farm			Goshen Huron wind farm	102	operating	2015		onshore						NextEra Energy INC		43.4029	-81.611	exact	Bluewater	Huron County	Southwestern Ontario	Ontario	https://gem.wiki/Goshen_wind_farm	L907039	G909465	US65339F1012	1	102	102	9	2055	2095	2135
wind	United States	Americas	Northern America	Granite Reliable Power wind farm	1			99	operating	2012		onshore						NextEra Energy INC		44.7532	-71.2987	exact		Coos County		New Hampshire	https://gem.wiki/Granite_Reliable_Power_wind_farm	L906959	G909368	US65339F1012	1	99	99	12	2052	2092	2132
wind	United States	Americas	Northern America	Grant Park wind farm	1			200	shelved			onshore						NextEra Energy INC		41.2454	-87.6425	approximate	Grant Park	Kankakee County		Illinois	https://gem.wiki/Grant_Park_wind_farm	L907370	G909928	US65339F1012	1	200	200	-99	40	80	120
wind	United States	Americas	Northern America	Gray County wind farm	Montezuma			112	operating	2001		onshore						NextEra Energy INC		37.6133	-100.355	exact		Gray County		Kansas	https://gem.wiki/Gray_County_wind_farm	L907077	G909529	US65339F1012	1	112	112	23	2041	2081	2121
wind	United States	Americas	Northern America	Great Prairie wind farm	1		Firewheel Wind Project	358	operating	2022		onshore						NextEra Energy INC		36.2972	-101.529	exact		Hansford County		Texas	https://gem.wiki/Great_Prairie_wind_farm	L907445	G910270	US65339F1012	1	867		2	2062	2102	2142
wind	United States	Americas	Northern America	Great Prairie wind farm	2		Firewheel Wind Project	210	operating	2022		onshore						NextEra Energy INC		36.3701	-101.555	exact		Hansford County		Texas	https://gem.wiki/Great_Prairie_wind_farm	L907445	G910038	US65339F1012	1	867		2	2062	2102	2142
wind	United States	Americas	Northern America	Great Prairie wind farm	3		Firewheel Wind Project	299	operating	2022		onshore						NextEra Energy INC		36.4566	-101.472	exact		Hansford County		Texas	https://gem.wiki/Great_Prairie_wind_farm	L907445	G910191	US65339F1012	1	867	867	2	2062	2102	2142
wind	United States	Americas	Northern America	Green Mountain wind farm	1		Garrett	10	retired	2000	2015	onshore						NextEra Energy INC		39.8514	-79.0706	exact	Summit Township	Somerset County		Pennsylvania	https://gem.wiki/Green_Mountain_wind_farm	L906297	G908560	US65339F1012	1	10	10	24	2040	2080	2120
wind	United States	Americas	Northern America	Hancock County wind farm	1			98	operating	2002		onshore						NextEra Energy INC		42.9422	-93.664	exact		Carbon County		Wyoming	https://gem.wiki/Hancock_County_wind_farm	L906931	G909331	US65339F1012	1	98	98	22	2042	2082	2122
wind	United States	Americas	Northern America	Hartland wind farm	1			300	cancelled			onshore						NextEra Energy INC		48.6186	-102.113	approximate	Kenaston	Ward County		North Dakota	https://gem.wiki/Hartland_wind_farm	L907579	G910216	US65339F1012	1	300	300	-99	40	80	120
wind	United States	Americas	Northern America	Heartland Divide wind farm	1			104	operating	2018		onshore						NextEra Energy INC		41.7588	-94.7951	exact		Audubon County		Iowa	https://gem.wiki/Heartland_Divide_wind_farm	L907052	G909482	US65339F1012	1	304		6	2058	2098	2138
wind	United States	Americas	Northern America	Heartland Divide wind farm	2			200	operating	2022		onshore						NextEra Energy INC		41.7588	-94.7951	exact		Audubon County		Iowa	https://gem.wiki/Heartland_Divide_wind_farm	L907052	G909932	US65339F1012	1	304	304	2	2062	2102	2142
wind	United States	Americas	Northern America	High Banks Wind	1			643	construction			onshore						NextEra Energy INC		39.816	-97.431	exact					https://gem.wiki/High_Banks_Wind	L921945	G927288	US65339F1012	1	643	643	-99	40	80	120
wind	United States	Americas	Northern America	High Lonesome Mesa wind farm	1			100	retired	2009	2019	onshore						NextEra Energy INC		34.489	-105.969	exact		Torrance County		New Mexico	https://gem.wiki/High_Lonesome_Mesa_wind_farm	L906986	G909403	US65339F1012	1	199		15	2049	2089	2129
wind	United States	Americas	Northern America	High Lonesome Mesa wind farm	RP			99	operating	2019		onshore						NextEra Energy INC		34.489	-105.969	exact					https://gem.wiki/High_Lonesome_Mesa_wind_farm	L906986	G927289	US65339F1012	1	199	199	5	2059	2099	2139
wind	United States	Americas	Northern America	Horse Hollow Wind Energy Center	1			210	retired	2005	2017	onshore						NextEra Energy INC		32.243	-100.026	exact		Taylor County		Texas	https://gem.wiki/Horse_Hollow_Wind_Energy_Center	L907446	G910039	US65339F1012	1	1466		19	2045	2085	2125
wind	United States	Americas	Northern America	Horse Hollow Wind Energy Center	2			299	retired	2006	2017	onshore						NextEra Energy INC		32.2526	-100.148	exact		Taylor County		Texas	https://gem.wiki/Horse_Hollow_Wind_Energy_Center	L907446	G910071	US65339F1012	1	1466		18	2046	2086	2126
wind	United States	Americas	Northern America	Horse Hollow Wind Energy Center	3			224	retired	2006	2017	onshore						NextEra Energy INC		32.2626	-100.294	exact		Nolan County		Texas	https://gem.wiki/Horse_Hollow_Wind_Energy_Center	L907446	G910192	US65339F1012	1	1466		18	2046	2086	2126
wind	United States	Americas	Northern America	Horse Hollow Wind Energy Center	RP1			210	operating	2017		onshore						NextEra Energy		32.243	-100.026	exact					https://gem.wiki/Horse_Hollow_Wind_Energy_Center	L907446	G927291	US65339F1012	1	1466		7	2057	2097	2137
wind	United States	Americas	Northern America	Horse Hollow Wind Energy Center	RP2			299	operating	2017		onshore						NextEra Energy		32.2526	-100.148	exact					https://gem.wiki/Horse_Hollow_Wind_Energy_Center	L907446	G927292	US65339F1012	1	1466		7	2057	2097	2137
wind	United States	Americas	Northern America	Horse Hollow Wind Energy Center	RP3			224	operating	2017		onshore						NextEra Energy		32.2626	-100.294	exact					https://gem.wiki/Horse_Hollow_Wind_Energy_Center	L907446	G927293	US65339F1012	1	1466	1466	7	2057	2097	2137
wind	United States	Americas	Northern America	Indian Mesa wind farm	1		NWP Indian Mesa Wind Farm	82	retired	2001	2018	onshore						NextEra Energy INC		30.9515	-102.164	exact		Pecos County		Texas	https://gem.wiki/Indian_Mesa_wind_farm	L906894	G909284	US65339F1012	1	164		23	2041	2081	2121
wind	United States	Americas	Northern America	Indian Mesa wind farm	RP			82	operating	2018		onshore						NextEra Energy INC		30.9515	-102.164	exact					https://gem.wiki/Indian_Mesa_wind_farm	L906894	G927298	US65339F1012	1	164	164	6	2058	2098	2138
wind	United States	Americas	Northern America	Irish Creek wind farm	1			301	operating	2021		onshore						NextEra Energy INC		39.6987	-96.5513	exact	Frankfort	Marshall County		Kansas	https://gem.wiki/Irish_Creek_wind_farm	L907600	G910238	US65339F1012	1	301	301	3	2061	2101	2141
wind	United States	Americas	Northern America	Javelina wind farm	1			250	operating	2015		onshore						NextEra Energy INC		27.3115	-98.9772	exact		Webb County		Texas	https://gem.wiki/Javelina_wind_farm	L907374	G910122	US65339F1012	1	450		9	2055	2095	2135
wind	United States	Americas	Northern America	Javelina wind farm	2			200	operating	2016		onshore						NextEra Energy INC		27.5056	-98.9028	exact		Webb County		Texas	https://gem.wiki/Javelina_wind_farm	L907374	G909934	US65339F1012	1	450	450	8	2056	2096	2136
wind	United States	Americas	Northern America	Jordan Creek wind farm	1			402	operating	2020		onshore						NextEra Energy INC		40.4578	-87.383	exact		Warren County		Indiana	https://gem.wiki/Jordan_Creek_wind_farm	L907649	G910297	US65339F1012	1	402	402	4	2060	2100	2140
wind	United States	Americas	Northern America	King Mountain Wind Ranch wind farm	1			278	operating	2001		onshore						NextEra Energy INC		31.271	-102.189	exact		Upton County		Texas	https://gem.wiki/King_Mountain_Wind_Ranch_wind_farm	L907534	G910166	US65339F1012	1	278	278	23	2041	2081	2121
wind	United States	Americas	Northern America	Kingman Wind Energy Center	1		Kingman Wind	207	operating	2016		onshore						NextEra Energy INC		37.5772	-98.1768	exact		Kingman County		Kansas	https://gem.wiki/Kingman_Wind_Energy_Center	L907439	G910029	US65339F1012	1	207	207	8	2056	2096	2136
wind	United States	Americas	Northern America	KODE Novus wind farm	RP			160	announced			onshore						NextEra Energy INC		36.527	-101.369	exact		Texas County		Oklahoma	https://gem.wiki/KODE_Novus_wind_farm	L906610	G921369	US65339F1012	1	160	160	-99	40	80	120
wind	United States	Americas	Northern America	Lake Benton wind farm	2			104	retired	1999	2019	onshore						NextEra Energy INC		44.133	-96.1489	exact		Pipestone County		Minnesota	https://gem.wiki/Lake_Benton_wind_farm	L907004	G909483	US65339F1012	1	104	104	25	2039	2079	2119
wind	United States	Americas	Northern America	Langdon wind farm	1			118	retired	2007	2018	onshore						NextEra Energy INC		48.5829	-98.2555	exact		Cavalier County		North Dakota	https://gem.wiki/Langdon_wind_farm	L906616	G909546	US65339F1012	1	328		17	2047	2087	2127
wind	United States	Americas	Northern America	Langdon wind farm	2			40	retired	2008	2018	onshore						NextEra Energy INC		48.6237	-98.3199	exact		Cavalier County		North Dakota	https://gem.wiki/Langdon_wind_farm	L906616	G908920	US65339F1012	1	328		16	2048	2088	2128
wind	United States	Americas	Northern America	Langdon wind farm	RP			170	operating	2018		onshore						NextEra Energy INC		48.5829	-98.2555	exact					https://gem.wiki/Langdon_wind_farm	L906616	G927304	US65339F1012	1	328	328	6	2058	2098	2138
wind	United States	Americas	Northern America	Lee Dekalb wind farm	1		FPL Energy Illinois Wind LLC Hybrid	218	operating	2009		onshore						NextEra Energy INC		41.8224	-88.785	exact		DeKalb County		Illinois	https://gem.wiki/Lee_Dekalb_wind_farm	L907458	G910060	US65339F1012	1	218	218	15	2049	2089	2129
wind	United States	Americas	Northern America	Limon wind farm	1			200	operating	2012		onshore						NextEra Energy INC		39.3836	-103.53	exact		Elbert County		Colorado	https://gem.wiki/Limon_wind_farm	L907377	G909937	US65339F1012	1	601		12	2052	2092	2132
wind	United States	Americas	Northern America	Limon wind farm	2			200	operating	2012		onshore						NextEra Energy INC		39.3749	-103.52	exact		Lincoln County		Colorado	https://gem.wiki/Limon_wind_farm	L907377	G909938	US65339F1012	1	601		12	2052	2092	2132
wind	United States	Americas	Northern America	Limon wind farm	3			201	operating	2014		onshore						NextEra Energy INC		39.3586	-103.369	exact		Lincoln County		Colorado	https://gem.wiki/Limon_wind_farm	L907377	G909984	US65339F1012	1	601	601	10	2054	2094	2134
wind	United States	Americas	Northern America	Little Blue Wind Project	1			250	operating	2021		onshore						NextEra Energy INC		40.2863	-98.5777	exact	Blue Hill	Webster County		Nebraska	https://gem.wiki/Little_Blue_Wind_Project	L907505	G910132	US65339F1012	1	250	250	3	2061	2101	2141
wind	United States	Americas	Northern America	Lorenzo Winds wind farm	1		Crosby County 2, Fiber Winds Energy	80	operating	2018		onshore						NextEra Energy INC		33.7463	-101.436	exact		Crosby County		Texas	https://gem.wiki/Lorenzo_Winds_wind_farm	L906885	G909273	US65339F1012	1	80	80	6	2058	2098	2138
wind	United States	Americas	Northern America	Luverne (NextEra) Wind Energy Center	1			105	operating	2009		onshore						NextEra Energy INC		47.3505	-97.9509	exact		Steele County		North Dakota	https://gem.wiki/Luverne_(NextEra)_Wind_Energy_Center	L907060	G909495	US65339F1012	1	105	105	15	2049	2089	2129
wind	United States	Americas	Northern America	Majestic wind farm	1		High Majestic	80	retired	2009	2020	onshore						NextEra Energy INC		35.3765	-101.536	exact		Carson County		Texas	https://gem.wiki/Majestic_wind_farm	L906849	G909225	US65339F1012	1	245		15	2049	2089	2129
wind	United States	Americas	Northern America	Majestic wind farm	2B		High Majestic	80	operating	2012		onshore						NextEra Energy INC		35.386	-101.579	exact		Carson County		Texas	https://gem.wiki/Majestic_wind_farm	L906849	G909228	US65339F1012	1	245		12	2052	2092	2132
wind	United States	Americas	Northern America	Majestic wind farm	RP1			85	operating	2020		onshore						NextEra Energy INC		35.3765	-101.536	exact					https://gem.wiki/Majestic_wind_farm	L906849	G927313	US65339F1012	1	245	245	4	2060	2100	2140
wind	United States	Americas	Northern America	Mammoth Plains wind farm	1			199	operating	2014		onshore						NextEra Energy INC		36.0271	-98.7542	exact		Dewey County		Oklahoma	https://gem.wiki/Mammoth_Plains_wind_farm	L907340	G909886	US65339F1012	1	199	199	10	2054	2094	2134
wind	United States	Americas	Northern America	Minco wind farm	1			99	retired	2010	2020	onshore						NextEra Energy INC		35.2823	-98.0359	exact		Grady County		Oklahoma	https://gem.wiki/Minco_wind_farm	L906969	G909382	US65339F1012	1	959		14	2050	2090	2130
wind	United States	Americas	Northern America	Minco wind farm	2			101	retired	2011	2021	onshore						NextEra Energy INC		35.3237	-98.0737	exact		Grady County		Oklahoma	https://gem.wiki/Minco_wind_farm	L906969	G909445	US65339F1012	1	959		13	2051	2091	2131
wind	United States	Americas	Northern America	Minco wind farm	3			101	retired	2012	2021	onshore						NextEra Energy INC		35.4051	-98.1196	exact		Canadian County		Oklahoma	https://gem.wiki/Minco_wind_farm	L906969	G909446	US65339F1012	1	959		12	2052	2092	2132
wind	United States	Americas	Northern America	Minco wind farm	4			130	operating	2018		onshore						NextEra Energy INC		35.3953	-98.2606	exact		Canadian County		Oklahoma	https://gem.wiki/Minco_wind_farm	L906969	G909605	US65339F1012	1	959		6	2058	2098	2138
wind	United States	Americas	Northern America	Minco wind farm	RP1			99	operating	2020		onshore						NextEra Energy INC		35.2823	-98.0359	exact					https://gem.wiki/Minco_wind_farm	L906969	G927315	US65339F1012	1	959		4	2060	2100	2140
wind	United States	Americas	Northern America	Minco wind farm	RP2			98	operating	2021		onshore						NextEra Energy INC		35.3237	-98.0737	exact					https://gem.wiki/Minco_wind_farm	L906969	G927316	US65339F1012	1	959		3	2061	2101	2141
wind	United States	Americas	Northern America	Minco wind farm	RP3			111	operating	2021		onshore						NextEra Energy INC		35.4051	-98.1196	exact					https://gem.wiki/Minco_wind_farm	L906969	G927317	US65339F1012	1	959		3	2061	2101	2141
wind	United States	Americas	Northern America	Minco wind farm	5			220	cancelled			onshore						NextEra Energy INC		35.4776	-98.4454	approximate	Hinton	Caddo County		Oklahoma	https://gem.wiki/Minco_wind_farm	L906969	G910065	US65339F1012	1	959	959	-99	40	80	120
wind	Canada	Americas	Northern America	Mont Copper wind farm				54	operating	2004		onshore						NextEra Energy INC		48.9779	-65.5506	exact	Mont-Albert	La Haute-Gaspésie		Quebec	https://gem.wiki/Mont_Copper_wind_farm	L906717	G909046	US65339F1012	1	54		20	2044	2084	2124
wind	Canada	Americas	Northern America	Mont Miller wind farm				54	operating	2005		onshore						NextEra Energy INC		48.9981	-65.4863	exact		La Côte-de-Gaspé		Quebec	https://gem.wiki/Mont_Miller_wind_farm	L906718	G909047	US65339F1012	1	54	54	19	2045	2085	2125
wind	United States	Americas	Northern America	Montezuma wind farm	1		FPL Energy Montezuma Winds LLC	37	operating	2010		onshore						NextEra Energy INC		38.1626	-121.793	exact		Solano County		California	https://gem.wiki/Montezuma_wind_farm	L906590	G908889	US65339F1012	1	115		14	2050	2090	2130
wind	United States	Americas	Northern America	Montezuma wind farm	2			78	operating	2012		onshore						NextEra Energy INC		38.1169	-121.81	exact		Solano County		California	https://gem.wiki/Montezuma_wind_farm	L906590	G909216	US65339F1012	1	115	115	12	2052	2092	2132
wind	United States	Americas	Northern America	Moose-Alder Stream Wind	1		Moose Wind	245	cancelled			onshore						NextEra Energy INC		45.2722	-70.6708	approximate		Franklin County		Maine	https://gem.wiki/Moose-Alder_Stream_Wind	L917231	G921381	US65339F1012	1	460		-99	40	80	120
wind	United States	Americas	Northern America	Moose-Alder Stream Wind	2		Alder Stream	215	cancelled			onshore						NextEra Energy INC		45.2722	-70.6708	approximate		Franklin County		Maine	https://gem.wiki/Moose-Alder_Stream_Wind	L917231	G921382	US65339F1012	1	460	460	-99	40	80	120
wind	United States	Americas	Northern America	New Mexico Wind Energy Center	1			204	operating	2003		onshore						NextEra Energy INC		34.5374	-104.081	exact		De Baca County		New Mexico	https://gem.wiki/New_Mexico_Wind_Energy_Center	L907431	G910019	US65339F1012	1	204	204	21	2043	2083	2123
wind	United States	Americas	Northern America	Ninnescah wind farm	1			208	operating	2016		onshore						NextEra Energy INC		37.6229	-98.5542	exact		Pratt County		Kansas	https://gem.wiki/Ninnescah_wind_farm	L907442	G910032	US65339F1012	1	208	208	8	2056	2096	2136
wind	United States	Americas	Northern America	Niyol wind farm	1			206	operating	2021		onshore						NextEra Energy INC		40.633	-102.927	exact	Fleming	Logan County		Colorado	https://gem.wiki/Niyol_wind_farm	L907383	G909947	US65339F1012	1	206	206	3	2061	2101	2141
wind	United States	Americas	Northern America	North Dakota wind farm	1A		FPL Energy North Dakota Wind I/II	40	operating	2003		onshore						NextEra Energy INC		46.3541	-98.8996	exact		LaMoure County		North Dakota	https://gem.wiki/North_Dakota_wind_farm	L906445	G908921	US65339F1012	1	61		21	2043	2083	2123
wind	United States	Americas	Northern America	North Dakota wind farm	1B		FPL Energy North Dakota Wind I/II	21	operating	2003		onshore						NextEra Energy INC		46.318	-98.8732	exact		LaMoure County		North Dakota	https://gem.wiki/North_Dakota_wind_farm	L906445	G908725	US65339F1012	1	61	61	21	2043	2083	2123
wind	United States	Americas	Northern America	North Sky River wind farm	1			162	operating	2012		onshore						NextEra Energy INC		35.3064	-118.226	exact		Kern County		California	https://gem.wiki/North_Sky_River_wind_farm	L907269	G909795	US65339F1012	1	162	162	12	2052	2092	2132
wind	United States	Americas	Northern America	Northeast Colorado Wind	1			22	retired	2009	2020	onshore						NextEra Energy INC		40.9808	-102.804	exact		Logan County		Colorado	https://gem.wiki/Northeast_Colorado_Wind	L906464	G908745	US65339F1012	1	174		15	2049	2089	2129
wind	United States	Americas	Northern America	Northeast Colorado Wind	2			152	retired	2009	2020	onshore						NextEra Energy INC		40.9808	-102.804	exact		Logan County		Colorado	https://gem.wiki/Northeast_Colorado_Wind	L906464	G909762	US65339F1012	1	174	174	15	2049	2089	2129
wind	United States	Americas	Northern America	Northern Divide Wind Energy Center	1		Burke Wind farm	199	operating	2021		onshore						NextEra Energy INC		48.8026	-102.867	exact		Burke County		North Dakota	https://gem.wiki/Northern_Divide_Wind_Energy_Center	L907345	G909893	US65339F1012	1	199	199	3	2061	2101	2141
wind	United States	Americas	Northern America	Oklahoma Wind Energy Center	1		Mooreland	51	retired	2003	2020	onshore						NextEra Energy INC		36.5801	-99.283	exact		Woodward County		Oklahoma	https://gem.wiki/Oklahoma_Wind_Energy_Center	L906706	G909031	US65339F1012	1	204		21	2043	2083	2123
wind	United States	Americas	Northern America	Oklahoma Wind Energy Center	2		Mooreland	51	retired	2003	2020	onshore						NextEra Energy INC		36.5801	-99.283	exact		Woodward County		Oklahoma	https://gem.wiki/Oklahoma_Wind_Energy_Center	L906706	G909032	US65339F1012	1	204		21	2043	2083	2123
wind	United States	Americas	Northern America	Oklahoma Wind Energy Center	RP		Mooreland	102	operating	2020		onshore						NextEra Energy INC		36.5801	-99.283	exact					https://gem.wiki/Oklahoma_Wind_Energy_Center	L906706	G927328	US65339F1012	1	204	204	4	2060	2100	2140
wind	United States	Americas	Northern America	Oliver County Wind Energy Center	1		FPL Energy Oliver	51	retired	2006	2020	onshore						NextEra Energy INC		47.1414	-101.226	exact		Oliver County		North Dakota	https://gem.wiki/Oliver_County_Wind_Energy_Center	L906660	G909023	US65339F1012	1	400		18	2046	2086	2126
wind	United States	Americas	Northern America	Oliver County Wind Energy Center	2		FPL Energy Oliver	48	retired	2007	2020	onshore						NextEra Energy INC		47.1582	-101.287	exact		Oliver County		North Dakota	https://gem.wiki/Oliver_County_Wind_Energy_Center	L906660	G908975	US65339F1012	1	400		17	2047	2087	2127
wind	United States	Americas	Northern America	Oliver County Wind Energy Center	3			99	operating	2017		onshore						NextEra Energy INC		46.9674	-101.153	exact		Morton County		North Dakota	https://gem.wiki/Oliver_County_Wind_Energy_Center	L906660	G909384	US65339F1012	1	400		7	2057	2097	2137
wind	United States	Americas	Northern America	Oliver County Wind Energy Center	4			202	announced	2024		onshore						NextEra Energy INC		47.1071	-101.334	approximate					https://gem.wiki/Oliver_County_Wind_Energy_Center	L906660	G927329	US65339F1012	1	400	400	0	2064	2104	2144
wind	United States	Americas	Northern America	Osborn wind farm	1			201	operating	2016		onshore						NextEra Energy INC		39.8932	-94.4797	exact		DeKalb County		Missouri	https://gem.wiki/Osborn_wind_farm	L907412	G909987	US65339F1012	1	201	201	8	2056	2096	2136
wind	United States	Americas	Northern America	Palm Springs wind farm	1		San Gorgonio Windplant WPP1993	34	retired	1994	2011	onshore						NextEra Energy INC		33.9109	-116.574	exact	Palm Springs	Riverside County		California	https://gem.wiki/Palm_Springs_wind_farm	L906583	G908880	US65339F1012	1	84		30	2034	2074	2114
wind	United States	Americas	Northern America	Palm Springs wind farm	RP1		San Gorgonio Windplant WPP1993	50	operating	2011		onshore						NextEra Energy INC		33.9109	-116.574	exact	Palm Springs	Riverside County		California	https://gem.wiki/Palm_Springs_wind_farm	L906583	G908988	US65339F1012	1	84	84	13	2051	2091	2131
wind	United States	Americas	Northern America	Palo Duro wind farm	1			250	operating	2014		onshore						NextEra Energy INC		36.4567	-101.001	exact		Ochiltree County		Texas	https://gem.wiki/Palo_Duro_wind_farm	L907499	G910125	US65339F1012	1	250	250	10	2054	2094	2134
wind	United States	Americas	Northern America	Peetz Table (NextEra) wind farm	1			201	operating	2007		onshore						NextEra Energy INC		40.941	-103.259	exact		Logan County		Colorado	https://gem.wiki/Peetz_Table_(NextEra)_wind_farm	L921959	G927335	US65339F1012	1	401		17	2047	2087	2127
wind	United States	Americas	Northern America	Peetz Table (NextEra) wind farm	2			200	operating	2007		onshore						NextEra Energy INC		40.9988	-103.375	exact		Logan County		Colorado	https://gem.wiki/Peetz_Table_(NextEra)_wind_farm	L921959	G927336	US65339F1012	1	401	401	17	2047	2087	2127
wind	United States	Americas	Northern America	Pegasus wind farm	1			49	operating	2019		onshore						NextEra Energy INC		43.489	-83.5706	exact		Tuscola County		Michigan	https://gem.wiki/Pegasus_wind_farm	L906665	G908981	US65339F1012	1	151		5	2059	2099	2139
wind	United States	Americas	Northern America	Pegasus wind farm	2			102	operating	2020		onshore						NextEra Energy INC		43.4839	-83.6161	exact		Tuscola County		Michigan	https://gem.wiki/Pegasus_wind_farm	L906665	G909476	US65339F1012	1	151	151	4	2060	2100	2140
wind	United States	Americas	Northern America	Perrin Ranch wind farm	1			99	operating	2012		onshore						NextEra Energy INC		35.4535	-112.22	exact		Coconino County		Arizona	https://gem.wiki/Perrin_Ranch_wind_farm	L906970	G909383	US65339F1012	1	99	99	12	2052	2092	2132
wind	United States	Americas	Northern America	Pheasant Run wind farm	1			75	operating	2013		onshore						NextEra Energy INC		43.7628	-83.2834	exact		Huron County		Michigan	https://gem.wiki/Pheasant_Run_wind_farm	L906821	G909182	US65339F1012	1	75	75	11	2053	2093	2133
wind	United States	Americas	Northern America	Pioneer Creek wind farm	1			250	pre-construction	2025		onshore						NextEra Energy INC		37.7594	-99.8603	approximate	Wright	Ford County		Kansas	https://gem.wiki/Pioneer_Creek_wind_farm	L907222	G909735	US65339F1012	1	250	250	-1	2065	2105	2145
wind	United States	Americas	Northern America	Pioneer Hutt Wind	1			145	pre-construction	2024		onshore						NextEra Energy INC		31.7983	-101.904	approximate					https://gem.wiki/Pioneer_Hutt_Wind	L921960	G927337	US65339F1012	1	145	145	0	2064	2104	2144
wind	United States	Americas	Northern America	Ponderosa Wind Energy Center	1			204	operating	2020		onshore						NextEra Energy INC		36.6246	-100.708	exact		Beaver County		Oklahoma	https://gem.wiki/Ponderosa_Wind_Energy_Center	L907429	G910017	US65339F1012	1	304		4	2060	2100	2140
wind	United States	Americas	Northern America	Ponderosa Wind Energy Center	2			100	announced	2024		onshore						NextEra Energy INC		36.5895	-100.804	approximate					https://gem.wiki/Ponderosa_Wind_Energy_Center	L907429	G927340	US65339F1012	1	304	304	0	2064	2104	2144
wind	United States	Americas	Northern America	Pratt Wind Energy Center	1			244	operating	2018		onshore						NextEra Energy INC		37.5662	-98.9373	exact		Pratt County		Kansas	https://gem.wiki/Pratt_Wind_Energy_Center	L907488	G910112	US65339F1012	1	244	244	6	2058	2098	2138
wind	United States	Americas	Northern America	Pretty Prairie wind farm	1		Reno County Wind Farm	220	cancelled			onshore						NextEra Energy INC		37.8607	-97.7988	approximate	Mount Hope	Reno County		Kansas	https://gem.wiki/Pretty_Prairie_wind_farm	L907461	G910067	US65339F1012	1	220	220	-99	40	80	120
wind	Canada	Americas	Northern America	Pubnico Point wind farm				31	operating	2005		onshore						NextEra Energy INC		43.6065	-65.7956	exact		Yarmouth County		Nova Scotia	https://gem.wiki/Pubnico_Point_wind_farm	L906566	G908860	US65339F1012	1	31	31	19	2045	2085	2125
wind	United States	Americas	Northern America	Red Canyon Wind Energy	1		Post Wind Farm LP	84	retired	2006	2017	onshore						NextEra Energy INC		32.9836	-101.246	exact		Garza County		Texas	https://gem.wiki/Red_Canyon_Wind_Energy	L906897	G909289	US65339F1012	1	168		18	2046	2086	2126
wind	United States	Americas	Northern America	Red Canyon Wind Energy	RP			84	operating	2017		onshore						NextEra Energy INC		32.9836	-101.246	exact					https://gem.wiki/Red_Canyon_Wind_Energy	L906897	G927345	US65339F1012	1	168	168	7	2057	2097	2137
wind	United States	Americas	Northern America	Red Mesa wind farm	1			102	operating	2010		onshore						NextEra Energy INC		35.2627	-107.381	exact		Cibola County		New Mexico	https://gem.wiki/Red_Mesa_wind_farm	L907047	G909474	US65339F1012	1	102	102	14	2050	2090	2130
wind	United States	Americas	Northern America	Roundhouse Wind Energy Project	1			227	operating	2020		onshore						NextEra Energy INC		41.0752	-105.117	exact		Laramie County		Wyoming	https://gem.wiki/Roundhouse_Wind_Energy_Project	L906997	G910078	US65339F1012	1	327		4	2060	2100	2140
wind	United States	Americas	Northern America	Roundhouse Wind Energy Project	2			100	construction			onshore						NextEra Energy INC		41.0752	-105.117	approximate		Laramie County		Wyoming	https://gem.wiki/Roundhouse_Wind_Energy_Project	L906997	G909415	US65339F1012	1	327	327	-99	40	80	120
wind	United States	Americas	Northern America	Rush Springs Wind Energy Center	1			249	operating	2016		onshore						NextEra Energy INC		34.7305	-97.8668	exact		Grady County		Oklahoma	https://gem.wiki/Rush_Springs_Wind_Energy_Center	L907494	G910119	US65339F1012	1	249	249	8	2056	2096	2136
wind	United States	Americas	Northern America	Seiling wind farm	1			199	operating	2014		onshore						NextEra Energy INC		36.1419	-99.0347	exact		Dewey County		Oklahoma	https://gem.wiki/Seiling_wind_farm	L907005	G909887	US65339F1012	1	299		10	2054	2094	2134
wind	United States	Americas	Northern America	Seiling wind farm	2			100	operating	2014		onshore						NextEra Energy INC		36.1817	-98.9589	exact		Woodward County		Oklahoma	https://gem.wiki/Seiling_wind_farm	L907005	G909423	US65339F1012	1	299	299	10	2054	2094	2134
wind	United States	Americas	Northern America	Sholes Wind Energy Center	1			160	operating	2019		onshore						NextEra Energy INC		42.2995	-97.3638	exact		Wayne County		Nebraska	https://gem.wiki/Sholes_Wind_Energy_Center	L907260	G909781	US65339F1012	1	160	160	5	2059	2099	2139
wind	United States	Americas	Northern America	Skeleton Creek Energy Center Hybrid Wind	1			251	operating	2020		onshore						NextEra Energy INC		36.5337	-98.227	exact		Alfalfa County		Oklahoma	https://gem.wiki/Skeleton_Creek_Energy_Center_Hybrid_Wind	L907515	G910143	US65339F1012	1	251	251	4	2060	2100	2140
wind	United States	Americas	Northern America	Sky River Wind Energy Center	1			77	retired	1991	2020	onshore						NextEra Energy INC		35.2689	-118.242	exact		Kern County		California	https://gem.wiki/Sky_River_Wind_Energy_Center	L906751	G909207	US65339F1012	1	137		33	2031	2071	2111
wind	United States	Americas	Northern America	Sky River Wind Energy Center	RP1			60	operating	2021		onshore						NextEra Energy INC		35.2689	-118.242	exact		Kern County		California	https://gem.wiki/Sky_River_Wind_Energy_Center	L906751	G909092	US65339F1012	1	137	137	3	2061	2101	2141
wind	United States	Americas	Northern America	Soldier Creek Wind Energy Center	1			301	operating	2020		onshore						NextEra Energy INC		39.5938	-96.0831	exact		Nemaha County		Kansas	https://gem.wiki/Soldier_Creek_Wind_Energy_Center	L907601	G910239	US65339F1012	1	301	301	4	2060	2100	2140
wind	United States	Americas	Northern America	South Dakota Wind Energy Center	1		Highmore Wind Energy Project	40	operating	2003		onshore						NextEra Energy INC		44.3686	-99.4431	exact		Hyde County		South Dakota	https://gem.wiki/South_Dakota_Wind_Energy_Center	L906618	G908923	US65339F1012	1	40	40	21	2043	2083	2123
wind	United States	Americas	Northern America	Southwest Mesa wind farm	1		West Texas Wind Energy	75	retired	1999	2019	onshore						NextEra Energy INC		31.0697	-102.125	exact		Crockett County		Texas	https://gem.wiki/Southwest_Mesa_wind_farm	L906824	G909185	US65339F1012	1	75	75	25	2039	2079	2119
wind	United States	Americas	Northern America	Stateline Wind Project	OR-1A		FPL Energy Vansycle LLC (OR)	83	operating	2001		onshore						NextEra Energy INC		45.9996	-118.812	exact		Umatilla County		Oregon	https://gem.wiki/Stateline_Wind_Project	L906601	G909287	US65339F1012	1	442		23	2041	2081	2121
wind	United States	Americas	Northern America	Stateline Wind Project	WA		FPL Energy Vansycle LLC (WA)	177	operating	2001		onshore						NextEra Energy INC		46.0401	-118.88	exact		Walla Walla County		Washington	https://gem.wiki/Stateline_Wind_Project	L906601	G909828	US65339F1012	1	442		23	2041	2081	2121
wind	United States	Americas	Northern America	Stateline Wind Project	OR-1B		FPL Energy Vansycle LLC (OR)	40	operating	2002		onshore						NextEra Energy INC		45.9763	-118.783	exact		Umatilla County		Oregon	https://gem.wiki/Stateline_Wind_Project	L906601	G908902	US65339F1012	1	442		22	2042	2082	2122
wind	United States	Americas	Northern America	Stateline Wind Project	OR RP1			142	pre-construction			onshore						NextEra Energy INC		45.9763	-118.783	approximate		Umatilla County		Oregon	https://gem.wiki/Stateline_Wind_Project	L906601	G909648	US65339F1012	1	442	442	-99	40	80	120
wind	United States	Americas	Northern America	Steele Flats Wind Energy Center	1			75	operating	2013		onshore						NextEra Energy INC		40.0569	-96.9705	exact		Jefferson County		Nebraska	https://gem.wiki/Steele_Flats_Wind_Energy_Center	L906823	G909184	US65339F1012	1	75	75	11	2053	2093	2133
wind	United States	Americas	Northern America	Story County wind farm	1		FPL Energy Story Wind LLC	150	retired	2008	2019	onshore						NextEra Energy INC		42.0534	-93.2627	exact		Story County		Iowa	https://gem.wiki/Story_County_wind_farm	L907228	G909744	US65339F1012	1	450		16	2048	2088	2128
wind	United States	Americas	Northern America	Story County wind farm	2		Garden Wind	150	operating	2009		onshore						NextEra Energy INC		42.2069	-93.299	exact		Hardin County		Iowa	https://gem.wiki/Story_County_wind_farm	L907228	G909745	US65339F1012	1	450		15	2049	2089	2129
wind	United States	Americas	Northern America	Story County wind farm	RP1			150	operating	2019		onshore						NextEra Energy INC		42.0534	-93.2627	exact					https://gem.wiki/Story_County_wind_farm	L907228	G927365	US65339F1012	1	450	450	5	2059	2099	2139
wind	United States	Americas	Northern America	Three Waters Wind Project	1			300	announced	2024		onshore						NextEra Energy INC		43.5966	-95.3479	approximate	Round Lake	Nobles County		Minnesota	https://gem.wiki/Three_Waters_Wind_Project	L907596	G910233	US65339F1012	1	300	300	0	2064	2104	2144
wind	United States	Americas	Northern America	Timberwolf wind farm	1			200	pre-construction	2023		onshore						NextEra Energy INC		43.5902	-92.3829	approximate	Ostrander	Fillmore County		Minnesota	https://gem.wiki/Timberwolf_wind_farm	L907400	G909966	US65339F1012	1	200	200	1	2063	2103	2143
wind	United States	Americas	Northern America	Torrecillas Wind Energy	1		Javelina III	300	operating	2018		onshore						NextEra Energy INC		27.5799	-98.8247	exact		Webb County		Texas	https://gem.wiki/Torrecillas_Wind_Energy	L907598	G910235	US65339F1012	1	300	300	6	2058	2098	2138
wind	United States	Americas	Northern America	Tuscola Bay Wind	1			120	operating	2012		onshore						NextEra Energy INC		43.5588	-83.6379	exact		Tuscola County		Michigan	https://gem.wiki/Tuscola_Bay_Wind	L907006	G909571	US65339F1012	1	220		12	2052	2092	2132
wind	United States	Americas	Northern America	Tuscola Bay Wind	2			100	operating	2013		onshore						NextEra Energy INC		43.4906	-83.5744	exact		Tuscola County		Michigan	https://gem.wiki/Tuscola_Bay_Wind	L907006	G909424	US65339F1012	1	220	220	11	2053	2093	2133
wind	United States	Americas	Northern America	Vansycle wind farm	1		Vansycle Ridge	25	operating	1998		onshore						NextEra Energy INC		45.9408	-118.666	exact		Umatilla County		Oregon	https://gem.wiki/Vansycle_wind_farm	L906505	G908790	US65339F1012	1	238		26	2038	2078	2118
wind	United States	Americas	Northern America	Vansycle wind farm	2		Vansycle Ridge	99	operating	2009		onshore						NextEra Energy INC		45.8916	-118.531	exact		Umatilla County		Oregon	https://gem.wiki/Vansycle_wind_farm	L906505	G909346	US65339F1012	1	238		15	2049	2089	2129
wind	United States	Americas	Northern America	Vansycle wind farm	RP2		Vansycle Ridge	114	announced			onshore						NextEra Energy INC		45.8916	-118.531	exact		Umatilla County		Oregon	https://gem.wiki/Vansycle_wind_farm	L906505	G909537	US65339F1012	1	238	238	-99	40	80	120
wind	United States	Americas	Northern America	Vasco wind farm	1			78	operating	2011		onshore						NextEra Energy INC		37.7985	-121.701	exact		Contra Costa County		California	https://gem.wiki/Vasco_wind_farm	L906847	G909217	US65339F1012	1	78	78	13	2051	2091	2131
wind	United States	Americas	Northern America	Weatherford Wind Energy Center	1			106	retired	2005	2020	onshore						NextEra Energy INC		35.4947	-98.7432	exact		Custer County		Oklahoma	https://gem.wiki/Weatherford_Wind_Energy_Center	L906619	G909506	US65339F1012	1	303		19	2045	2085	2125
wind	United States	Americas	Northern America	Weatherford Wind Energy Center	2			40	retired	2005	2020	onshore						NextEra Energy INC		35.4623	-98.6573	exact		Washita County		Oklahoma	https://gem.wiki/Weatherford_Wind_Energy_Center	L906619	G908924	US65339F1012	1	303		19	2045	2085	2125
wind	United States	Americas	Northern America	Weatherford Wind Energy Center	RP			157	operating	2020		onshore						NextEra Energy INC		35.4947	-98.7432	exact					https://gem.wiki/Weatherford_Wind_Energy_Center	L906619	G927378	US65339F1012	1	303	303	4	2060	2100	2140
wind	United States	Americas	Northern America	Wessington Springs wind farm	1			51	operating	2009		onshore						NextEra Energy INC		44.0021	-98.5996	exact		Jerauld County		South Dakota	https://gem.wiki/Wessington_Springs_wind_farm	L906707	G909033	US65339F1012	1	51	51	15	2049	2089	2129
wind	United States	Americas	Northern America	West Fork wind farm	1			150	cancelled			onshore						NextEra Energy INC		39.7302	-85.2677	approximate	Posey Township	Fayette County		Indiana	https://gem.wiki/West_Fork_wind_farm	L907231	G909748	US65339F1012	1	150	150	-99	40	80	120
wind	United States	Americas	Northern America	Wheatridge East Wind	1			200	announced	2024		onshore						NextEra Energy INC		45.5426	-119.382	approximate					https://gem.wiki/Wheatridge_East_Wind	L921977	G927381	US65339F1012	1	200	200	0	2064	2104	2144
wind	United States	Americas	Northern America	Wheatridge Renewable Wind Energy Center	1			300	operating	2020		onshore						Portland General Electric (PGE); NextEra Energy		45.4905	-119.531	exact		Morrow County		Oregon	https://gem.wiki/Wheatridge_Renewable_Wind_Energy_Center	L907562	G910198	US65339F1012	0.5	300	300	4	2060	2100	2140
wind	United States	Americas	Northern America	White Hills wind farm	1		Mohave County Wind Farm	350	operating	2020		onshore						NextEra Energy INC		35.8005	-114.441	exact		Mohave County		Arizona	https://gem.wiki/White_Hills_wind_farm	L907619	G910262	US65339F1012	1	350	350	4	2060	2100	2140
wind	United States	Americas	Northern America	White Mesa wind farm	1			500	operating	2021		onshore						NextEra Energy INC		30.8811	-101.212	exact	Ozona	Crockett County		Texas	https://gem.wiki/White_Mesa_wind_farm	L907665	G910321	US65339F1012	1	500	500	3	2061	2101	2141
wind	United States	Americas	Northern America	White Oak wind farm	1			150	operating	2011		onshore						NextEra Energy INC		40.5866	-89.0727	exact		McLean County		Illinois	https://gem.wiki/White_Oak_wind_farm	L907232	G909749	US65339F1012	1	150	150	13	2051	2091	2131
wind	United States	Americas	Northern America	Wildcat Ranch Wind Project	1		Bonita Wildcat Ranch	151	operating	2018		onshore						NextEra Energy INC		33.499	-102.86	exact		Cochran County		Texas	https://gem.wiki/Wildcat_Ranch_Wind_Project	L907236	G909753	US65339F1012	1	151	151	6	2058	2098	2138
wind	United States	Americas	Northern America	Wilton wind farm	1A		FPL Energy Burleigh County Wind	32	retired	2005	2020	onshore						NextEra Energy INC		47.1269	-100.711	exact		Burleigh County		North Dakota	https://gem.wiki/Wilton_wind_farm	L906384	G908865	US65339F1012	1	203		19	2045	2085	2125
wind	United States	Americas	Northern America	Wilton wind farm	1B		FPL Energy Burleigh County Wind	18	retired	2006	2020	onshore						NextEra Energy INC		47.116	-100.652	exact		Burleigh County		North Dakota	https://gem.wiki/Wilton_wind_farm	L906384	G908656	US65339F1012	1	203		18	2046	2086	2126
wind	United States	Americas	Northern America	Wilton wind farm	2		Wilton Wind II LLC	50	retired	2009	2019	onshore						NextEra Energy INC		47.1094	-100.777	exact		Burleigh County		North Dakota	https://gem.wiki/Wilton_wind_farm	L906384	G908990	US65339F1012	1	203		15	2049	2089	2129
wind	United States	Americas	Northern America	Wilton wind farm	RP2			50	operating	2019		onshore						NextEra Energy INC		47.1094	-100.777	exact					https://gem.wiki/Wilton_wind_farm	L906384	G927385	US65339F1012	1	203		5	2059	2099	2139
wind	United States	Americas	Northern America	Wilton wind farm	RP1			53	operating	2020		onshore						NextEra Energy INC		47.1269	-100.711	exact					https://gem.wiki/Wilton_wind_farm	L906384	G927384	US65339F1012	1	203	203	4	2060	2100	2140
wind	United States	Americas	Northern America	Wind Power Partners 1994	1		West Texas Windplant	40	retired	1995	2014	onshore						NextEra Energy INC		29.4142	-98.4931	approximate				Texas	https://gem.wiki/Wind_Power_Partners_1994	L906614	G908918	US65339F1012	1	40	40	29	2035	2075	2115
wind	United States	Americas	Northern America	Windstar wind farm (United States)	1			120	operating	2012		onshore						NextEra Energy INC		35.0275	-118.271	exact		Kern County		California	https://gem.wiki/Windstar_wind_farm_(United_States)	L907112	G909574	US65339F1012	1	120	120	12	2052	2092	2132
wind	United States	Americas	Northern America	Wolf Ridge wind farm	1			112	retired	2008	2020	onshore						NextEra Energy INC		33.7318	-97.4492	exact		Cooke County		Texas	https://gem.wiki/Wolf_Ridge_wind_farm	L907081	G909533	US65339F1012	1	232		16	2048	2088	2128
wind	United States	Americas	Northern America	Wolf Ridge wind farm	RP			120	operating	2020		onshore						NextEra Energy INC		33.7318	-97.4492	exact					https://gem.wiki/Wolf_Ridge_wind_farm	L907081	G927387	US65339F1012	1	232	232	4	2060	2100	2140
wind	United States	Americas	Northern America	Woodward Mountain wind farm	1		Woodward Mountain I	82	operating	2001		onshore						NextEra Energy INC		30.9478	-102.477	exact		Pecos County		Texas	https://gem.wiki/Woodward_Mountain_wind_farm	L906838	G909285	US65339F1012	1	158		23	2041	2081	2121
wind	United States	Americas	Northern America	Woodward Mountain wind farm	2		Woodward Mountain II	76	operating	2001		onshore						NextEra Energy INC		30.9432	-102.425	exact		Pecos County		Texas	https://gem.wiki/Woodward_Mountain_wind_farm	L906838	G909202	US65339F1012	1	158	158	23	2041	2081	2121
wind	United States	Americas	Northern America	Yavapai Ranch wind farm	1			99	cancelled			onshore						NextEra Energy INC		35.1473	-112.913	approximate		Yavapai County		Arizona	https://gem.wiki/Yavapai_Ranch_wind_farm	L917255	G921410	US65339F1012	1	99	99	-99	40	80	120

## Sheet: Factors
Fuel Type	Capacity factor 2021	Capacity factor 2022	CF2020	CF2021	CF2022	CF2023		NextEra Energy Inc. - annual report 2021	https://www.investor.nexteraenergy.com/~/media/Files/N/NEE-IR/reports-and-fillings/annual-reports/2021%20NEE%20Annual%20Report.pdf
Coal-hard	0.540032	0.347632	0.373292	0.706772	0.278305	0.41696		NextEra Energy Inc. - annual report 2022	https://www.investor.nexteraenergy.com/~/media/Files/N/NEE-IR/reports-and-fillings/annual-reports/NEE%202022%20Annual%20Report.pdf
Lignite	0	0	0	0	0	0
Oil	0.0235895	0.0675432	0.0124328	0.0347462	0.0932557	0.0418306
Gas	0.458376	0.465108	0.479602	0.43715	0.466319	0.463897
Fuel Type	Heat rate (Btu per kWh) 2022
Coal	10689							CDP C-EU8.2d 2021										CDP C-EU8.2d 2022
Petroleum	11166							Energy Source Type	Nameplate capacity (MW)	Gross electricity generation (GWh)	Net electricity generation (GWh)	Absolute scope 1 emissions (metric tons CO2e)	Scope 1 emissions intensity (metric tons CO2e per GWh)		Capacity factor			Energy Source Type	Nameplate capacity (MW)	Gross electricity generation (GWh)	Net electricity generation (GWh)	Absolute scope 1 emissions (metric tons CO2e)	Scope 1 emissions intensity (metric tons CO2e per GWh)		Capacity factor
Natural Gas	7740							Coal – hard	717		4439	5009591	1129		0.706744			Coal – hard	717		1748	2.49065e+06	1129		0.278303
Nuclear	10448							Lignite										Lignite
								Oil	964		293	70053	239		0.0346966			Oil	855		698	198811	239		0.0931934
Fuel Type	Emission factors (kg of CO2 per TJ) US		Fuel Type	Emission factors (kg of CO2 per TJ) IPCC2006				Gas	26030		99680	37273604	374		0.437149			Gas	25683		104914	3.86526e+07	374	27255	0.46632
Bituminous Coal	88374.7		Crude Oil	73300				Sustainable biomass	3		21	129	6		0.799087			Sustainable biomass	3		22	12692.4	6		0.837139
Distillate Oil	70271.4		Natural Gas Liquids	64200				Other biomass										Other biomass
Jet Fuel	68461		Coking Coal	94600				Waste (non-biomass)										Waste (non-biomass)
Kerosene	69370.9		Other Bituminous Coal	94600				Nuclear	5795		46943	0	0		0.924726			Nuclear	5795		50458	0	0		0.993968
Lignite Coal	93142.3		Sub-Bituminous Coal	96100				Fossil-fuel plants fitted with CCS										Fossil-fuel plants fitted with CCS
Municipal Solid Waste	47286.7		Lignite	101000				Geothermal										Geothermal
Natural Gas	50149.2		Coke	107000				Hydropower										Hydropower
Petroleum Coke	96791.4		Gas/Diesel Oil	74100				Wind	16517		54679	0	0		0			Wind	18891		59813	0	0		0
Propane Gas	59598.9		Residual Fuel Oil	77400				Solar	6548		15233	0	0		0			Solar	7534		15199	0	0		0
Refined Coal	88374.7		Natural Gas	56100				Marine										Marine
Residual Fuel Oil	71171.8		Natural Gas Liquids	64200				Other renewable										Other renewable
Subbituminous Coal	92061.8		Wood / Wood Waste	112000				Other non-renewable										Other non-renewable
Tire-Derived Fuel	81484.1		Charcoal	112000				Total	56574		221289	42353376	191		0.446518			Total	59478		232854	4.13547e+07	191		0.446913
Waste Coal	88374.7		Industrial Wastes	143000														https://www.investor.nexteraenergy.com/~/media/Files/N/NEE-IR/Sustainability/Sustainability%202023/NEE-%20CDP%20Response%202023.pdf
Waste Oil	70138.7		Waste Oils	73300					2018	2019	2020	2021	2022
Fuel Type	Emission factors (kg of CO2 per MMBTU) US		Fuel Type	Emission factors (kg of CO2 per MMBTU) IPCC2006				NextEra Energy Owned Net Generation Capacity at end of year (MW)(3, 4)
Bituminous Coal	93.24		Crude Oil	77.3354				Coal(5)	964	2554	1351	717	717
Distillate Oil	74.14		Natural Gas Liquids	67.7344				Natural Gas(6)	20744	23973	24533	26030	25683
Jet Fuel	72.23		Coking Coal	99.808				Nuclear	6202	6202	5792	5795	5795
Kerosene	73.19		Other Bituminous Coal	99.808				Oil	890	944	1473	964	855
Lignite Coal	98.27		Sub-Bituminous Coal	101.391				Solar(7)	3243	3894	5505	6555	7534
Municipal Solid Waste	49.89		Lignite	106.56				Wind	13528	14110	16073	16517	18891		22598	27471	27357	27711	27255
Natural Gas	52.91		Coke	112.891				Landfill Gas	0	3	3	3	3		45571	51677	54730	56581	59478
Petroleum Coke	102.12		Gas/Diesel Oil	78.1794				NextEra Energy Owned Net Generation (MWh) (3,4)							2018	2019	2020	2021	2022	CF2020_21	CF2018_22
Propane Gas	62.88		Residual Fuel Oil	81.6611				Coal(5)	2941854	6923744	4417826	4439180	1.74801e+06		0.348369	0.309468	0.373292	0.706772	0.278305	0.540032	0.41696
Refined Coal	93.24		Natural Gas	59.1885				Natural Gas	91735562	99230129	103070751	99680103	104913929	1976000	0.504825	0.472517	0.479602	0.43715	0.466319	0.458376	0.463897
Residual Fuel Oil	75.09		Natural Gas Liquids	67.7344				Nuclear	50539324	51118396	49869793	46943053	5.04583e+07		0.930237	0.940895	0.98289	0.924728	0.993975	0.953809	0.960622
Subbituminous Coal	97.13		Wood / Wood Waste	118.166				Oil	587385	222347	160427	293419	698467		0.0753405	0.0268878	0.0124328	0.0347462	0.0932557	0.0235895	0.0418306
Tire-Derived Fuel	85.97		Charcoal	118.166				Solar	6586603	7059936	9417857	15232598	1.51996e+07		0.231852	0.206967	0.195295	0.265276	0.230304
Waste Coal	93.24		Industrial Wastes	150.873				Wind	40695498	42807582	49248884	54679068	5.98137e+07		0.343407	0.34633	0.34978	0.377908	0.361444
Waste Oil	74		Waste Oils	77.3354				Landfill Gas	0	22547	21615	21259	22376
								Total	193,086,226	207,384,681	216207152	221288680	2.32854e+08				30600	NEER
																	33276	FPL	63876
								NextEra Energy Owned Generation (% of total MWhs), by fuel type (3,4)								wind	24970	NEER
								Coal(5)	0.015	0.033	0.0204	0.0201	0.00750689			solar	7650
								Natural Gas	0.475	0.478	0.4767	0.4505	0.450556
								Nuclear	0.262	0.246	0.2307	0.2121	0.216695
								Oil	0.003	0.001	0.0007	0.0013	0.00299959
								Solar	0.034	0.034	0.0436	0.0688	0.0652751
								Wind	0.211	0.206	0.2278	0.2471	0.256872
								Landfill Gas	0	0.0001	0.0001	0.0001	9.60944e-05
								https://www.investor.nexteraenergy.com/~/media/Files/N/NEE-IR/Sustainability/Sustainability%202023/2023_By_the_Numbers_vF.xlsx
								https://www.investor.nexteraenergy.com/sustainability/sustainability-resources
									33520	0.73	24469.6

## Sheet: NextEraEnergy_BAU
Type	Country/area	Region	Subregion	Plant / Project name	Unit / Phase name	Plant / Project name (local)	Plant / Project name (other)	Capacity (MW)	Status	Start year	Retired year	Technology	Fuel	Country/area 1 (hydropower only)	Country/area 2 (hydropower only)	Country/area 1 Capacity (MW) (hydropower only)	Country/area 2 Capacity (MW) (hydropower only)	Owner	Parent	Latitude	Longitude	Location accuracy	City	Local area (taluk, county)	Major area (prefecture, district)	Subnational unit (state, province)	GEM.Wiki URL	GEM location ID	GEM unit/phase ID	CompISIN	Ownership	Plant capacity	Plant capacity	Age	Reinvestment year	Reinvestment year	Reinvestment year	2020	2021	2022	2023	2024	2025	2026	2027	2028	2029	2030	2031
coal	United States	Americas	Northern America	Daniel Generating Plant	Unit 1		Victor J. Daniel Generating Plant	500	operating	1977	2024	subcritical	bituminous					Florida Power & Light [50%]; Mississippi Power [50%]	NextEra Energy Inc [50.0%]; Southern Co [50.0%]	30.5327	-88.5571	exact	Escatawpa	Jackson		Mississippi	https://www.gem.wiki/Daniel_Generating_Plant	L100000104008	G100000101965	US65339F1012	0.5	1000		47	2017	2057	2097	250	250	250	250	250	250	250	250	250	250	250	250
coal	United States	Americas	Northern America	Daniel Generating Plant	Unit 2		Victor J. Daniel Generating Plant	500	operating	1981	2027	subcritical	bituminous					Florida Power & Light [50%]; Mississippi Power [50%]	NextEra Energy Inc [50.0%]; Southern Co [50.0%]	30.5327	-88.5571	exact	Escatawpa	Jackson		Mississippi	https://www.gem.wiki/Daniel_Generating_Plant	L100000104008	G100000101966	US65339F1012	0.5	1000	1000	43	2021	2061	2101	250	250	250	250	250	250	250	250	250	250	250	250
coal	United States	Americas	Northern America	Scherer Steam Generating Station	Unit 3			891	operating	1987	2028	subcritical	subbituminous					Florida Power & Light [25%]; Georgia Power [75%]	Southern Co [75.0%]; NextEra Energy Inc [25.0%]	33.0603	-83.8069	exact	Juliette	Monroe		Georgia	https://www.gem.wiki/Scherer_Steam_Generating_Station	L100000103847	G100000108871	US65339F1012	0.25	1782		37	2027	2067	2107	222.75	222.75	222.75	222.75	222.75	222.75	222.75	222.75	222.75	222.75	222.75	222.75
coal	United States	Americas	Northern America	Scherer Steam Generating Station	Unit 4			891	retired	1989	2021	subcritical	subbituminous					JEA [23%]; Florida Power & Light [76%]	NextEra Energy Inc [76.4%]; JEA [23.6%]	33.0603	-83.8069	exact	Juliette	Monroe		Georgia	https://www.gem.wiki/Scherer_Steam_Generating_Station	L100000103847	G100000108872	US65339F1012	0.764	1782	1782	35	2029	2069	2109	680.724	0	0	0	0	0	0	0	0	0	0	0
oil/gas	United States	Americas	Northern America	Bayswater peaking facility	1			61	operating	2002		GT	NG					Bayswater Peaking Facility LLC [100.0%]	NextEra Energy Inc [100.0%]	40.6107	-73.7622	exact	Far Rockaway	Queens		New York	https://www.gem.wiki/Bayswater_peaking_facility	L100000401744	G100000402522	US65339F1012	1	61	61	22	2042	2082	2122	61	61	61	61	61	61	61	61	61	61	61	61
oil/gas	United States	Americas	Northern America	Cape Canaveral power station	PCC			1295	operating	2013		CC	NG/FO					Florida Power & Light Co [100.0%]	NextEra Energy Inc [100.0%]	28.4698	-80.7644	exact	Cocoa	Brevard		Florida	https://www.gem.wiki/Cape_Canaveral_power_station	L100000401947	G100000402107	US65339F1012	1	1295	1295	11	2053	2093	2133	1295	1295	1295	1295	1295	1295	1295	1295	1295	1295	1295	1295
oil/gas	United States	Americas	Northern America	Fort Myers power station	9			62	operating	1974		GT	FO					Florida Power & Light Co [100.0%]	NextEra Energy Inc [100.0%]	26.6967	-81.7831	exact	Ft. Myers	Lee		Florida	https://www.gem.wiki/Fort_Myers_power_station	L100000401948	G100000414271	US65339F1012	1	2682		50	2014	2054	2094	62	62	62	62	62	62	62	62	62	62	62	62
oil/gas	United States	Americas	Northern America	Fort Myers power station	GT1			62	operating	1974		GT	FO					Florida Power & Light Co [100.0%]	NextEra Energy Inc [100.0%]	26.6967	-81.7831	exact	Ft. Myers	Lee		Florida	https://www.gem.wiki/Fort_Myers_power_station	L100000401948	G100000414270	US65339F1012	1	2682		50	2014	2054	2094	62	62	62	62	62	62	62	62	62	62	62	62
oil/gas	United States	Americas	Northern America	Fort Myers power station	F901			1722	operating	2001		CC	NG/FO					Florida Power & Light Co [100.0%]	NextEra Energy Inc [100.0%]	26.6967	-81.7831	exact	Ft. Myers	Lee		Florida	https://www.gem.wiki/Fort_Myers_power_station	L100000401948	G100000402113	US65339F1012	1	2682		23	2041	2081	2121	1722	1722	1722	1722	1722	1722	1722	1722	1722	1722	1722	1722
oil/gas	United States	Americas	Northern America	Fort Myers power station	CT1			188	operating	2003		GT	NG/FO					Florida Power & Light Co [100.0%]	NextEra Energy Inc [100.0%]	26.6967	-81.7831	exact	Ft. Myers	Lee		Florida	https://www.gem.wiki/Fort_Myers_power_station	L100000401948	G100000402902	US65339F1012	1	2682		21	2043	2083	2123	188	188	188	188	188	188	188	188	188	188	188	188
oil/gas	United States	Americas	Northern America	Fort Myers power station	CT2			188	operating	2003		GT	NG/FO					Florida Power & Light Co [100.0%]	NextEra Energy Inc [100.0%]	26.6967	-81.7831	exact	Ft. Myers	Lee		Florida	https://www.gem.wiki/Fort_Myers_power_station	L100000401948	G100000402903	US65339F1012	1	2682		21	2043	2083	2123	188	188	188	188	188	188	188	188	188	188	188	188
oil/gas	United States	Americas	Northern America	Fort Myers power station	PFM3C			230	operating	2016		GT	NG/FO					Florida Power & Light Co [100.0%]	NextEra Energy Inc [100.0%]	26.6967	-81.7831	exact	Ft. Myers	Lee		Florida	https://www.gem.wiki/Fort_Myers_power_station	L100000401948	G100000402904	US65339F1012	1	2682		8	2056	2096	2136	230	230	230	230	230	230	230	230	230	230	230	230
oil/gas	United States	Americas	Northern America	Fort Myers power station	PFM3D			230	operating	2016		GT	NG/FO					Florida Power & Light Co [100.0%]	NextEra Energy Inc [100.0%]	26.6967	-81.7831	exact	Ft. Myers	Lee		Florida	https://www.gem.wiki/Fort_Myers_power_station	L100000401948	G100000402905	US65339F1012	1	2682	2682	8	2056	2096	2136	230	230	230	230	230	230	230	230	230	230	230	230
oil/gas	United States	Americas	Northern America	Gulf Clean Energy Center	4		Crist plant	93.7	operating	2021		ST	NG					Florida Power & Light Co [100.0%]	NextEra Energy Inc [100.0%]	30.5661	-87.2244	exact	Pensacola	Escambia		Florida	https://www.gem.wiki/Gulf_Clean_Energy_Center	L100000103824	G100000411172	US65339F1012	1	2107.4		3	2061	2101	2141	0	93.7	93.7	93.7	93.7	93.7	93.7	93.7	93.7	93.7	93.7	93.7
oil/gas	United States	Americas	Northern America	Gulf Clean Energy Center	5		Crist plant	93.7	operating	2021		ST	NG					Florida Power & Light Co [100.0%]	NextEra Energy Inc [100.0%]	30.5661	-87.2244	exact	Pensacola	Escambia		Florida	https://www.gem.wiki/Gulf_Clean_Energy_Center	L100000103824	G100000411171	US65339F1012	1	2107.4		3	2061	2101	2141	0	93.7	93.7	93.7	93.7	93.7	93.7	93.7	93.7	93.7	93.7	93.7
oil/gas	United States	Americas	Northern America	Gulf Clean Energy Center	6		Crist plant	370	operating	2021		ST	NG					Florida Power & Light Co [100.0%]	NextEra Energy Inc [100.0%]	30.5661	-87.2244	exact	Pensacola	Escambia		Florida	https://www.gem.wiki/Gulf_Clean_Energy_Center	L100000103824	G100000409445	US65339F1012	1	2107.4		3	2061	2101	2141	0	370	370	370	370	370	370	370	370	370	370	370
oil/gas	United States	Americas	Northern America	Gulf Clean Energy Center	7		Crist plant	578	operating	2021		ST	NG					Florida Power & Light Co [100.0%]	NextEra Energy Inc [100.0%]	30.5661	-87.2244	exact	Pensacola	Escambia		Florida	https://www.gem.wiki/Gulf_Clean_Energy_Center	L100000103824	G100000409444	US65339F1012	1	2107.4		3	2061	2101	2141	0	578	578	578	578	578	578	578	578	578	578	578
oil/gas	United States	Americas	Northern America	Gulf Clean Energy Center	8A		Crist plant	243	operating	2021		GT	NG/FO					Florida Power & Light Co [100.0%]	NextEra Energy Inc [100.0%]	30.5661	-87.2244	exact	Pensacola	Escambia		Florida	https://www.gem.wiki/Gulf_Clean_Energy_Center	L100000103824	G100000410533	US65339F1012	1	2107.4		3	2061	2101	2141	0	243	243	243	243	243	243	243	243	243	243	243
oil/gas	United States	Americas	Northern America	Gulf Clean Energy Center	8B		Crist plant	243	operating	2021		GT	NG/FO					Florida Power & Light Co [100.0%]	NextEra Energy Inc [100.0%]	30.5661	-87.2244	exact	Pensacola	Escambia		Florida	https://www.gem.wiki/Gulf_Clean_Energy_Center	L100000103824	G100000410532	US65339F1012	1	2107.4		3	2061	2101	2141	0	243	243	243	243	243	243	243	243	243	243	243
oil/gas	United States	Americas	Northern America	Gulf Clean Energy Center	8C		Crist plant	243	operating	2021		GT	NG/FO					Florida Power & Light Co [100.0%]	NextEra Energy Inc [100.0%]	30.5661	-87.2244	exact	Pensacola	Escambia		Florida	https://www.gem.wiki/Gulf_Clean_Energy_Center	L100000103824	G100000410531	US65339F1012	1	2107.4		3	2061	2101	2141	0	243	243	243	243	243	243	243	243	243	243	243
oil/gas	United States	Americas	Northern America	Gulf Clean Energy Center	8D		Crist plant	243	operating	2021		GT	NG/FO					Florida Power & Light Co [100.0%]	NextEra Energy Inc [100.0%]	30.5661	-87.2244	exact	Pensacola	Escambia		Florida	https://www.gem.wiki/Gulf_Clean_Energy_Center	L100000103824	G100000410530	US65339F1012	1	2107.4	2107.4	3	2061	2101	2141	0	243	243	243	243	243	243	243	243	243	243	243
oil/gas	United States	Americas	Northern America	Lauderdale power station	6A			230	operating	2016		GT	NG/FO					Florida Power & Light Co [100.0%]	NextEra Energy Inc [100.0%]	26.0686	-80.1984	exact	Ft. Lauderdale	Broward		Florida	https://www.gem.wiki/Lauderdale_power_station	L100000401949	G100000402906	US65339F1012	1	2313		8	2056	2096	2136	230	230	230	230	230	230	230	230	230	230	230	230
oil/gas	United States	Americas	Northern America	Lauderdale power station	6B			230	operating	2016		GT	NG/FO					Florida Power & Light Co [100.0%]	NextEra Energy Inc [100.0%]	26.0686	-80.1984	exact	Ft. Lauderdale	Broward		Florida	https://www.gem.wiki/Lauderdale_power_station	L100000401949	G100000402907	US65339F1012	1	2313		8	2056	2096	2136	230	230	230	230	230	230	230	230	230	230	230	230
oil/gas	United States	Americas	Northern America	Lauderdale power station	6C			230	operating	2016		GT	NG/FO					Florida Power & Light Co [100.0%]	NextEra Energy Inc [100.0%]	26.0686	-80.1984	exact	Ft. Lauderdale	Broward		Florida	https://www.gem.wiki/Lauderdale_power_station	L100000401949	G100000402908	US65339F1012	1	2313		8	2056	2096	2136	230	230	230	230	230	230	230	230	230	230	230	230
oil/gas	United States	Americas	Northern America	Lauderdale power station	6D			230	operating	2016		GT	NG/FO					Florida Power & Light Co [100.0%]	NextEra Energy Inc [100.0%]	26.0686	-80.1984	exact	Ft. Lauderdale	Broward		Florida	https://www.gem.wiki/Lauderdale_power_station	L100000401949	G100000402909	US65339F1012	1	2313		8	2056	2096	2136	230	230	230	230	230	230	230	230	230	230	230	230
oil/gas	United States	Americas	Northern America	Lauderdale power station	6E			230	operating	2016		GT	NG/FO					Florida Power & Light Co [100.0%]	NextEra Energy Inc [100.0%]	26.0686	-80.1984	exact	Ft. Lauderdale	Broward		Florida	https://www.gem.wiki/Lauderdale_power_station	L100000401949	G100000402910	US65339F1012	1	2313		8	2056	2096	2136	230	230	230	230	230	230	230	230	230	230	230	230
oil/gas	United States	Americas	Northern America	Lauderdale power station	DBCC		Dania Beach Energy Center	1163	operating	2022		CC	NG/FO					Florida Power & Light Co [100.0%]	NextEra Energy Inc [100.0%]	26.0686	-80.1984	exact	Ft. Lauderdale	Broward		Florida	https://www.gem.wiki/Lauderdale_power_station	L100000401949	G100000402115	US65339F1012	1	2313	2313	2	2062	2102	2142	0	0	1163	1163	1163	1163	1163	1163	1163	1163	1163	1163
oil/gas	United States	Americas	Northern America	Manatee power station	1			863	operating	1976		ST	NG/FO					Florida Power & Light Co [100.0%]	NextEra Energy Inc [100.0%]	27.6058	-82.3456	exact	Parrish	Manatee		Florida	https://www.gem.wiki/Manatee_power_station	L100000401950	G100000409498	US65339F1012	1	2951		48	2016	2056	2096	863	863	863	863	863	863	863	863	863	863	863	863
oil/gas	United States	Americas	Northern America	Manatee power station	2			863	operating	1977		ST	NG/FO					Florida Power & Light Co [100.0%]	NextEra Energy Inc [100.0%]	27.6058	-82.3456	exact	Parrish	Manatee		Florida	https://www.gem.wiki/Manatee_power_station	L100000401950	G100000409497	US65339F1012	1	2951		47	2017	2057	2097	863	863	863	863	863	863	863	863	863	863	863	863
oil/gas	United States	Americas	Northern America	Manatee power station	G341			1225	operating	2005		CC	NG/FO					Florida Power & Light Co [100.0%]	NextEra Energy Inc [100.0%]	27.6058	-82.3456	exact	Parrish	Manatee		Florida	https://www.gem.wiki/Manatee_power_station	L100000401950	G100000402093	US65339F1012	1	2951	2951	19	2045	2085	2125	1225	1225	1225	1225	1225	1225	1225	1225	1225	1225	1225	1225
oil/gas	United States	Americas	Northern America	Martin Point power station	C796			612	operating	1994		CC	NG/FO					Florida Power & Light Co [100.0%]	NextEra Energy Inc [100.0%]	27.0536	-80.5628	exact	Indiantown	Martin		Florida	https://www.gem.wiki/Martin_Point_power_station	L100000401951	G100000402094	US65339F1012	1	2449		30	2034	2074	2114	612	612	612	612	612	612	612	612	612	612	612	612
oil/gas	United States	Americas	Northern America	Martin Point power station	C797			612	operating	1994		CC	NG/FO					Florida Power & Light Co [100.0%]	NextEra Energy Inc [100.0%]	27.0536	-80.5628	exact	Indiantown	Martin		Florida	https://www.gem.wiki/Martin_Point_power_station	L100000401951	G100000402095	US65339F1012	1	2449		30	2034	2074	2114	612	612	612	612	612	612	612	612	612	612	612	612
oil/gas	United States	Americas	Northern America	Martin Point power station	G342			1225	operating	2005		ISCC	NG/FO					Florida Power & Light Co [100.0%]	NextEra Energy Inc [100.0%]	27.0536	-80.5628	exact	Indiantown	Martin		Florida	https://www.gem.wiki/Martin_Point_power_station	L100000401951	G100000402096	US65339F1012	1	2449	2449	19	2045	2085	2125	1225	1225	1225	1225	1225	1225	1225	1225	1225	1225	1225	1225
oil/gas	United States	Americas	Northern America	Okeechobee Clean energy center	CC1			1723	operating	2019		CC	NG/FO					Florida Power & Light Co [100.0%]	NextEra Energy Inc [100.0%]	27.6342	-80.7911	exact	Okeechobee	Okeechobee		Florida	https://www.gem.wiki/Okeechobee_Clean_energy_center	L100000401952	G100000402090	US65339F1012	1	1723	1723	5	2059	2099	2139	1723	1723	1723	1723	1723	1723	1723	1723	1723	1723	1723	1723
oil/gas	United States	Americas	Northern America	Oleander power project	OG1			199	operating	2002		GT	NG/FO					Oleander Holdings LLC [100.0%]	NextEra Energy Inc [100.0%]	28.3661	-80.7947	exact	Cocoa	Brevard		Florida	https://www.gem.wiki/Oleander_power_project	L100000402171	G100000403332	US65339F1012	1	995		22	2042	2082	2122	199	199	199	199	199	199	199	199	199	199	199	199
oil/gas	United States	Americas	Northern America	Oleander power project	OG2			199	operating	2002		GT	NG/FO					Oleander Holdings LLC [100.0%]	NextEra Energy Inc [100.0%]	28.3661	-80.7947	exact	Cocoa	Brevard		Florida	https://www.gem.wiki/Oleander_power_project	L100000402171	G100000403333	US65339F1012	1	995		22	2042	2082	2122	199	199	199	199	199	199	199	199	199	199	199	199
oil/gas	United States	Americas	Northern America	Oleander power project	OG3			199	operating	2002		GT	NG/FO					Oleander Holdings LLC [100.0%]	NextEra Energy Inc [100.0%]	28.3661	-80.7947	exact	Cocoa	Brevard		Florida	https://www.gem.wiki/Oleander_power_project	L100000402171	G100000403334	US65339F1012	1	995		22	2042	2082	2122	199	199	199	199	199	199	199	199	199	199	199	199
oil/gas	United States	Americas	Northern America	Oleander power project	OG4			199	operating	2002		GT	NG/FO					Oleander Holdings LLC [100.0%]	NextEra Energy Inc [100.0%]	28.3661	-80.7947	exact	Cocoa	Brevard		Florida	https://www.gem.wiki/Oleander_power_project	L100000402171	G100000403335	US65339F1012	1	995		22	2042	2082	2122	199	199	199	199	199	199	199	199	199	199	199	199
oil/gas	United States	Americas	Northern America	Oleander power project	OG5			199	operating	2007		GT	NG/FO					Oleander Holdings LLC [100.0%]	NextEra Energy Inc [100.0%]	28.3661	-80.7947	exact	Cocoa	Brevard		Florida	https://www.gem.wiki/Oleander_power_project	L100000402171	G100000403336	US65339F1012	1	995	995	17	2047	2087	2127	199	199	199	199	199	199	199	199	199	199	199	199
oil/gas	United States	Americas	Northern America	Port Everglades power station	CC1			1352	operating	2016		CC	NG/FO					Florida Power & Light Co [100.0%]	NextEra Energy Inc [100.0%]	26.0856	-80.1253	exact	Ft. Lauderdale	Broward		Florida	https://www.gem.wiki/Port_Everglades_power_station	L100000401953	G100000402116	US65339F1012	1	1352	1352	8	2056	2096	2136	1352	1352	1352	1352	1352	1352	1352	1352	1352	1352	1352	1352
oil/gas	United States	Americas	Northern America	Riviera power station	PRV			1295	operating	2014		CC	NG/FO					Florida Power & Light Co [100.0%]	NextEra Energy Inc [100.0%]	26.7653	-80.0525	exact	Riviera Beach	Palm Beach		Florida	https://www.gem.wiki/Riviera_power_station	L100000401954	G100000402117	US65339F1012	1	1295	1295	10	2054	2094	2134	1295	1295	1295	1295	1295	1295	1295	1295	1295	1295	1295	1295
oil/gas	United States	Americas	Northern America	Sanford power station	G161			1189	operating	2002		CC	NG					Florida Power & Light Co [100.0%]	NextEra Energy Inc [100.0%]	28.8419	-81.3256	exact	DeBary	Volusia		Florida	https://www.gem.wiki/Sanford_power_station	L100000401955	G100000402119	US65339F1012	1	2378		22	2042	2082	2122	1189	1189	1189	1189	1189	1189	1189	1189	1189	1189	1189	1189
oil/gas	United States	Americas	Northern America	Sanford power station	G160			1189	operating	2003		CC	NG					Florida Power & Light Co [100.0%]	NextEra Energy Inc [100.0%]	28.8419	-81.3256	exact	DeBary	Volusia		Florida	https://www.gem.wiki/Sanford_power_station	L100000401955	G100000402118	US65339F1012	1	2378	2378	21	2043	2083	2123	1189	1189	1189	1189	1189	1189	1189	1189	1189	1189	1189	1189
oil/gas	United States	Americas	Northern America	Turkey Point power station	G901			1224	operating	2007		CC	NG/FO					Florida Power & Light Co [100.0%]	NextEra Energy Inc [100.0%]	25.4356	-80.3308	exact	Homestead	Miami Dade		Florida	https://www.gem.wiki/Turkey_Point_power_station	L100000401956	G100000402123	US65339F1012	1	1224	1224	17	2047	2087	2127	1224	1224	1224	1224	1224	1224	1224	1224	1224	1224	1224	1224
oil/gas	United States	Americas	Northern America	West County energy center	WC1			1421	operating	2009		CC	NG/FO					Florida Power & Light Co [100.0%]	NextEra Energy Inc [100.0%]	26.6986	-80.3747	exact	Loxahatchee	Palm Beach		Florida	https://www.gem.wiki/West_County_energy_center	L100000401957	G100000402020	US65339F1012	1	4263		15	2049	2089	2129	1421	1421	1421	1421	1421	1421	1421	1421	1421	1421	1421	1421
oil/gas	United States	Americas	Northern America	West County energy center	WC2			1421	operating	2009		CC	NG/FO					Florida Power & Light Co [100.0%]	NextEra Energy Inc [100.0%]	26.6986	-80.3747	exact	Loxahatchee	Palm Beach		Florida	https://www.gem.wiki/West_County_energy_center	L100000401957	G100000402021	US65339F1012	1	4263		15	2049	2089	2129	1421	1421	1421	1421	1421	1421	1421	1421	1421	1421	1421	1421
oil/gas	United States	Americas	Northern America	West County energy center	WC3			1421	operating	2011		CC	NG/FO					Florida Power & Light Co [100.0%]	NextEra Energy Inc [100.0%]	26.6986	-80.3747	exact	Loxahatchee	Palm Beach		Florida	https://www.gem.wiki/West_County_energy_center	L100000401957	G100000402022	US65339F1012	1	4263	4263	13	2051	2091	2131	1421	1421	1421	1421	1421	1421	1421	1421	1421	1421	1421	1421
oil/gas	United States	Americas	Northern America	William F Wyman Hybrid power station	1			50	operating	1957		ST	HFO					FPL Energy Wyman LLC [100.0%]	NextEra Energy Maine LLC	43.7508	-70.1567	exact	Yarmouth	Cumberland		Maine	https://www.gem.wiki/William_F_Wyman_Hybrid_power_station	L100000409248	G100000414159	US65339F1012	1	846		67	1997	2037	2077	50	50	50	50	50	50	50	50	50	50	50	50
oil/gas	United States	Americas	Northern America	William F Wyman Hybrid power station	2			50	operating	1958		ST	HFO					FPL Energy Wyman LLC [100.0%]	NextEra Energy Maine LLC	43.7508	-70.1567	exact	Yarmouth	Cumberland		Maine	https://www.gem.wiki/William_F_Wyman_Hybrid_power_station	L100000409248	G100000414158	US65339F1012	1	846		66	1998	2038	2078	50	50	50	50	50	50	50	50	50	50	50	50
oil/gas	United States	Americas	Northern America	William F Wyman Hybrid power station	3			113.6	operating	1965		ST	HFO					FPL Energy Wyman LLC [100.0%]	NextEra Energy Maine LLC	43.7508	-70.1567	exact	Yarmouth	Cumberland		Maine	https://www.gem.wiki/William_F_Wyman_Hybrid_power_station	L100000409248	G100000414157	US65339F1012	1	846		59	2005	2045	2085	113.6	113.6	113.6	113.6	113.6	113.6	113.6	113.6	113.6	113.6	113.6	113.6
oil/gas	United States	Americas	Northern America	William F Wyman Hybrid power station	4			632.4	operating	1978		ST	HFO					FPL Energy Wyman LLC [84.3%]; Constellation Nuclear LLC [5.9%]; Massachusetts Mun Wholes Electric Co [3.7%]; Public Service Company of New Hampshire [3.1%]; other [2.9%]	Eversource Energy [3.1%]; Constellation Energy Corp; NextEra Energy Maine LLC	43.7508	-70.1567	exact	Yarmouth	Cumberland		Maine	https://www.gem.wiki/William_F_Wyman_Hybrid_power_station	L100000409248	G100000414156	US65339F1012	0.33	846	846	46	2018	2058	2098	208.692	208.692	208.692	208.692	208.692	208.692	208.692	208.692	208.692	208.692	208.692	208.692
solar	United States	Americas	Northern America	Adelanto Solar				20	operating	2015		PV						NextEra Energy INC		34.5572	-117.377	exact		San Bernardino County		California	https://gem.wiki/Adelanto_Solar	L804609	G805322	US65339F1012	1	20	20	9	2055	2095	2135	20	20	20	20	20	20	20	20	20	20	20	20
solar	United States	Americas	Northern America	Appleseed Solar				200	pre-construction	2023		PV						NextEra Energy INC		40.7202	-86.2911	approximate		Cass County		Indiana	https://gem.wiki/Appleseed_Solar	L808383	G810574	US65339F1012	1	200	200	1	2063	2103	2143	0	0	0	0	0	0	0	0	0	0	0	0
solar	United States	Americas	Northern America	Arlington Energy Center (NextEra) solar farm	1			100	operating	2022		PV						NextEra Energy INC		33.6909	-114.775	exact	Blythe	Riverside County		California	https://gem.wiki/Arlington_Energy_Center_(NextEra)_solar_farm	L804610	G805323	US65339F1012	1	364		2	2062	2102	2142	0	0	100	100	100	100	100	100	100	100	100	100
solar	United States	Americas	Northern America	Arlington Energy Center (NextEra) solar farm	3			131	operating	2022		PV						NextEra Energy INC		33.6909	-114.775	exact	Blythe	Riverside County		California	https://gem.wiki/Arlington_Energy_Center_(NextEra)_solar_farm	L804610	G805324	US65339F1012	1	364		2	2062	2102	2142	0	0	131	131	131	131	131	131	131	131	131	131
solar	United States	Americas	Northern America	Arlington Energy Center (NextEra) solar farm	2			133	construction	2023		PV						NextEra Energy INC		33.6909	-114.775	exact	Blythe	Riverside County		California	https://gem.wiki/Arlington_Energy_Center_(NextEra)_solar_farm	L804610	G805325	US65339F1012	1	364	364	1	2063	2103	2143	0	0	0	133	133	133	133	133	133	133	133	133
solar	United States	Americas	Northern America	Babbitt Ranch Solar			Babbitt Ranch Energy	60	announced	2025		PV						NextEra Energy INC		32.0838	-110.867	approximate		Coconico County		Arizona	https://gem.wiki/Babbitt_Ranch_Solar	L805170	G805951	US65339F1012	1	60	60	-1	2065	2105	2145	0	0	0	0	0	0	0	0	0	0	0	0
solar	United States	Americas	Northern America	Babcock Preserve solar farm				74	operating	2020		PV						NextEra Energy INC		26.854	-81.725	exact		Charlotte County		Florida	https://gem.wiki/Babcock_Preserve_solar_farm	L804611	G805326	US65339F1012	1	74		4	2060	2100	2140	74	74	74	74	74	74	74	74	74	74	74	74
solar	United States	Americas	Northern America	Babcock Solar Energy Center Hybrid			Babcock Ranch Solar	74	operating	2016		PV						NextEra Energy INC		26.865	-81.741	exact		Charlotte County		Florida	https://gem.wiki/Babcock_Solar_Energy_Center_Hybrid	L804612	G805327	US65339F1012	1	74		8	2056	2096	2136	74	74	74	74	74	74	74	74	74	74	74	74
solar	United States	Americas	Northern America	Barefoot Bay Solar Energy Center				74	operating	2018		PV						NextEra Energy INC		27.8658	-80.5211	exact		Brevard County		Florida	https://gem.wiki/Barefoot_Bay_Solar_Energy_Center	L804613	G805328	US65339F1012	1	74		6	2058	2098	2138	74	74	74	74	74	74	74	74	74	74	74	74
solar	United States	Americas	Northern America	Bell Ridge Solar				74	construction	2023		PV						NextEra Energy INC		29.7187	-82.7108	exact		Gilchrist County		Florida	https://gem.wiki/Bell_Ridge_Solar	L808389	G810580	US65339F1012	1	74	74	1	2063	2103	2143	0	0	0	74	74	74	74	74	74	74	74	74
solar	United States	Americas	Northern America	Big Cypress Solar				180	pre-construction	2023		PV						NextEra Energy INC		35.3446	-90.3075	approximate		Crittenden County		Arkansas	https://gem.wiki/Big_Cypress_Solar	L808391	G810585	US65339F1012	1	180	180	1	2063	2103	2143	0	0	0	0	0	0	0	0	0	0	0	0
solar	United States	Americas	Northern America	Blackburn Solar				58	pre-construction			PV						NextEra Energy INC		35.5761	-81.2981	approximate		Catawba County		North Carolina	https://gem.wiki/Blackburn_Solar	L808392	G810586	US65339F1012	1	58	58	-99	40	80	120	0	0	0	0	0	0	0	0	0	0	0	0
solar	United States	Americas	Northern America	Blue Cypress Solar Energy Center				74	operating	2018		PV						NextEra Energy INC		27.601	-80.533	exact		Indian River County		Florida	https://gem.wiki/Blue_Cypress_Solar_Energy_Center	L804614	G805329	US65339F1012	1	74		6	2058	2098	2138	74	74	74	74	74	74	74	74	74	74	74	74
solar	United States	Americas	Northern America	Blue Heron Solar				74	operating	2020		PV						NextEra Energy INC		26.7016	-81.1292	exact		Hendry County		Florida	https://gem.wiki/Blue_Heron_Solar	L804615	G805330	US65339F1012	1	74	74	4	2060	2100	2140	74	74	74	74	74	74	74	74	74	74	74	74
solar	United States	Americas	Northern America	Blue Springs solar farm				75	operating	2022		PV						NextEra Energy INC		30.7829	-85.0787	exact	Marianna	Jackson County		Florida	https://gem.wiki/Blue_Springs_solar_farm	L804616	G805331	US65339F1012	1	75	75	2	2062	2102	2142	0	0	75	75	75	75	75	75	75	75	75	75
solar	United States	Americas	Northern America	Bluebell Solar	1			30	operating	2018		PV						NextEra Energy INC		31.8701	-100.828	exact		Sterling County		Texas	https://gem.wiki/Bluebell_Solar	L805171	G805952	US65339F1012	1	145		6	2058	2098	2138	30	30	30	30	30	30	30	30	30	30	30	30
solar	United States	Americas	Northern America	Bluebell Solar	2			115	operating	2020		PV						NextEra Energy INC		31.889	-100.842	exact		Sterling County		Texas	https://gem.wiki/Bluebell_Solar	L805171	G805953	US65339F1012	1	145	145	4	2060	2100	2140	115	115	115	115	115	115	115	115	115	115	115	115
solar	United States	Americas	Northern America	Blythe (NextEra) solar farm	1A		Blythe Solar 110	39	operating	2016		PV						NextEra Energy INC		33.6801	-114.742	exact		Riverside County		California	https://gem.wiki/Blythe_(NextEra)_solar_farm	L805172	G805960	US65339F1012	1	516		8	2056	2096	2136	39	39	39	39	39	39	39	39	39	39	39	39
solar	United States	Americas	Northern America	Blythe (NextEra) solar farm	1B		Blythe Solar 110	36	operating	2016		PV						NextEra Energy INC		33.6801	-114.742	exact		Riverside County		California	https://gem.wiki/Blythe_(NextEra)_solar_farm	L805172	G805959	US65339F1012	1	516		8	2056	2096	2136	36	36	36	36	36	36	36	36	36	36	36	36
solar	United States	Americas	Northern America	Blythe (NextEra) solar farm	1C		Blythe Solar 110	35	operating	2016		PV						NextEra Energy INC		33.6801	-114.742	exact		Riverside County		California	https://gem.wiki/Blythe_(NextEra)_solar_farm	L805172	G805958	US65339F1012	1	516		8	2056	2096	2136	35	35	35	35	35	35	35	35	35	35	35	35
solar	United States	Americas	Northern America	Blythe (NextEra) solar farm	2A		Blythe Solar II	33	operating	2016		PV						NextEra Energy INC		33.6801	-114.73	exact		Riverside County		California	https://gem.wiki/Blythe_(NextEra)_solar_farm	L805172	G805956	US65339F1012	1	516		8	2056	2096	2136	33	33	33	33	33	33	33	33	33	33	33	33
solar	United States	Americas	Northern America	Blythe (NextEra) solar farm	2B		Blythe Solar II	34	operating	2016		PV						NextEra Energy INC		33.6801	-114.73	exact		Riverside County		California	https://gem.wiki/Blythe_(NextEra)_solar_farm	L805172	G805957	US65339F1012	1	516		8	2056	2096	2136	34	34	34	34	34	34	34	34	34	34	34	34
solar	United States	Americas	Northern America	Blythe (NextEra) solar farm	2C		Blythe Solar II	32	operating	2016		PV						NextEra Energy INC		33.674	-114.744	exact		Riverside County		California	https://gem.wiki/Blythe_(NextEra)_solar_farm	L805172	G805954	US65339F1012	1	516		8	2056	2096	2136	32	32	32	32	32	32	32	32	32	32	32	32
solar	United States	Americas	Northern America	Blythe (NextEra) solar farm	2D		Blythe Solar II	32	operating	2016		PV						NextEra Energy INC		33.674	-114.744	exact		Riverside County		California	https://gem.wiki/Blythe_(NextEra)_solar_farm	L805172	G805955	US65339F1012	1	516		8	2056	2096	2136	32	32	32	32	32	32	32	32	32	32	32	32
solar	United States	Americas	Northern America	Blythe (NextEra) solar farm	3A		Blythe Solar III Hybrid	137	operating	2020		PV						NextEra Energy INC		33.656	-114.742	exact		Riverside County		California	https://gem.wiki/Blythe_(NextEra)_solar_farm	L805172	G805963	US65339F1012	1	516		4	2060	2100	2140	137	137	137	137	137	137	137	137	137	137	137	137
solar	United States	Americas	Northern America	Blythe (NextEra) solar farm	4A		Blythe Solar IV	69	operating	2020		PV						NextEra Energy INC		33.682	-114.768	exact		Riverside County		California	https://gem.wiki/Blythe_(NextEra)_solar_farm	L805172	G805961	US65339F1012	1	516		4	2060	2100	2140	69	69	69	69	69	69	69	69	69	69	69	69
solar	United States	Americas	Northern America	Blythe (NextEra) solar farm	4B		Blythe Solar IV	69	operating	2020		PV						NextEra Energy INC		33.682	-114.768	exact		Riverside County		California	https://gem.wiki/Blythe_(NextEra)_solar_farm	L805172	G805962	US65339F1012	1	516	516	4	2060	2100	2140	69	69	69	69	69	69	69	69	69	69	69	69
solar	United States	Americas	Northern America	Boulder Flats Solar				113	construction	2024		PV						NextEra Energy INC		35.8789	-114.983	exact	Wadsworth	Washoe County		Nevada	https://gem.wiki/Boulder_Flats_Solar	L805173	G805964	US65339F1012	1	113	113	0	2064	2104	2144	0	0	0	0	113	113	113	113	113	113	113	113
solar	United States	Americas	Northern America	Bowling Green Solar			DG AMP Solar Bowling Green	20	operating	2017		PV						NextEra Energy INC		41.396	-83.582	exact		Wood County		Ohio	https://gem.wiki/Bowling_Green_Solar	L804617	G805332	US65339F1012	1	20		7	2057	2097	2137	20	20	20	20	20	20	20	20	20	20	20	20
solar	United States	Americas	Northern America	Briel Farm solar farm				20	operating	2021		PV						NextEra Energy INC		37.5236	-77.2636	exact		Henrico County		Virginia	https://gem.wiki/Briel_Farm_solar_farm	L804619	G805334	US65339F1012	1	20	20	3	2061	2101	2141	0	20	20	20	20	20	20	20	20	20	20	20
solar	United States	Americas	Northern America	Buena Vista Solar Project			Otero Solar	120	operating	2023		PV						NextEra Energy INC		32.075	-106.333	approximate		Otero County		New Mexico	https://gem.wiki/Buena_Vista_Solar_Project	L805174	G805965	US65339F1012	1	120	120	1	2063	2103	2143	0	0	0	120	120	120	120	120	120	120	120	120
solar	United States	Americas	Northern America	Calverton Solar Energy Center				23	operating	2022		PV						NextEra Energy		40.9137	-72.7504	exact		Suffolk County		New York	https://gem.wiki/Calverton_Solar_Energy_Center	L832763	G838359	US65339F1012	1	23	23	2	2062	2102	2142	0	0	23	23	23	23	23	23	23	23	23	23
solar	United States	Americas	Northern America	Cattle Ranch solar farm				74	operating	2020		PV						NextEra Energy INC		27.3219	-81.8091	exact		DeSoto County		Florida	https://gem.wiki/Cattle_Ranch_solar_farm	L804620	G805335	US65339F1012	1	74	74	4	2060	2100	2140	74	74	74	74	74	74	74	74	74	74	74	74
solar	United States	Americas	Northern America	Cavalry Solar				200	pre-construction	2024		PV						NextEra Energy INC; Northern Indiana Public Service Company LLC (NIPSCO)		40.6304	-79.1446	approximate		White County		Indiana	https://gem.wiki/Cavalry_Solar	L804679	G805394	US65339F1012	0.5	200		0	2064	2104	2144	0	0	0	0	0	0	0	0	0	0	0	0
solar	United States	Americas	Northern America	Cayuga Solar				200	announced	2023		PV						NextEra Energy INC		42.7105	-76.421	approximate		Cayuga County		New York	https://gem.wiki/Cayuga_Solar	L832777	G838374	US65339F1012	1	200	200	1	2063	2103	2143	0	0	0	0	0	0	0	0	0	0	0	0
solar	United States	Americas	Northern America	Cereal City Solar				100	pre-construction	2023		PV						NextEra Energy INC		42.3058	-85.0323	approximate		Calhoun County		Michigan	https://gem.wiki/Cereal_City_Solar	L805176	G805967	US65339F1012	1	100	100	1	2063	2103	2143	0	0	0	0	0	0	0	0	0	0	0	0
solar	United States	Americas	Northern America	Chaves Solar				70	operating	2016		PV						NextEra Energy INC		33.4501	-104.456	exact	Roswell	Chaves County		New Mexico	https://gem.wiki/Chaves_Solar	L804621	G805336	US65339F1012	1	70	70	8	2056	2096	2136	70	70	70	70	70	70	70	70	70	70	70	70
solar	United States	Americas	Northern America	Chesapeake solar farm				118	construction	2023		PV						NextEra Energy INC		39.4564	-77.9663	approximate				Virginia	https://gem.wiki/Chesapeake_solar_farm	L805354	G806184	US65339F1012	1	118	118	1	2063	2103	2143	0	0	0	118	118	118	118	118	118	118	118	118
solar	United States	Americas	Northern America	Chicot Solar			Lake Village	100	operating	2020		PV						NextEra Energy INC		33.479	-91.349	exact		Chicot County		Arkansas	https://gem.wiki/Chicot_Solar	L804622	G805337	US65339F1012	1	100	100	4	2060	2100	2140	100	100	100	100	100	100	100	100	100	100	100	100
solar	United States	Americas	Northern America	Citrus Solar Energy Center Hybrid				74	operating	2016		PV						NextEra Energy INC		27.3209	-81.8069	exact		DeSoto County		Florida	https://gem.wiki/Citrus_Solar_Energy_Center_Hybrid	L804623	G805338	US65339F1012	1	74	74	8	2056	2096	2136	74	74	74	74	74	74	74	74	74	74	74	74
solar	United States	Americas	Northern America	Coolidge Solar				19.6	operating	2018		PV						NextEra Energy INC		43.4282	-72.6653	exact	Ludlow	Windsor		Vermont	https://gem.wiki/Coolidge_Solar	L808409	G810609	US65339F1012	1	19.6	19.6	6	2058	2098	2138	19.6	19.6	19.6	19.6	19.6	19.6	19.6	19.6	19.6	19.6	19.6	19.6
solar	United States	Americas	Northern America	Coral Farms Solar Energy Center				74	operating	2018		PV						NextEra Energy INC		29.7569	-81.8972	exact		Putnam County		Florida	https://gem.wiki/Coral_Farms_Solar_Energy_Center	L804624	G805339	US65339F1012	1	74	74	6	2058	2098	2138	74	74	74	74	74	74	74	74	74	74	74	74
solar	United States	Americas	Northern America	Dallas Solar Project				80	pre-construction	2023		PV						NextEra Energy INC		32.4395	-87.0597	approximate		Selma County		Alabama	https://gem.wiki/Dallas_Solar_Project	L805178	G805969	US65339F1012	1	80	80	1	2063	2103	2143	0	0	0	0	0	0	0	0	0	0	0	0
solar	United States	Americas	Northern America	Desert Sunlight 250 solar farm	12			29	operating	2013		PV						Clearway Energy Group [25.0%]; Harbert Power Fund V (HPF V) [24.9%]; NextEra Energy Partners LP [49.9%]; Other [0.2%]		33.8055	-115.395	exact		Riverside County		California	https://gem.wiki/Desert_Sunlight_250_solar_farm	L808416	G810618	US65339F1012	0.499	248.9		11	2053	2093	2133	14.471	14.471	14.471	14.471	14.471	14.471	14.471	14.471	14.471	14.471	14.471	14.471
solar	United States	Americas	Northern America	Desert Sunlight 250 solar farm	13			25	operating	2013		PV						Clearway Energy Group [25.0%]; Harbert Power Fund V (HPF V) [24.9%]; NextEra Energy Partners LP [49.9%]; Other [0.2%]		33.8055	-115.395	exact		Riverside County		California	https://gem.wiki/Desert_Sunlight_250_solar_farm	L808416	G810619	US65339F1012	0.499	248.9		11	2053	2093	2133	12.475	12.475	12.475	12.475	12.475	12.475	12.475	12.475	12.475	12.475	12.475	12.475
solar	United States	Americas	Northern America	Desert Sunlight 250 solar farm	14			23	operating	2013		PV						Clearway Energy Group [25.0%]; Harbert Power Fund V (HPF V) [24.9%]; NextEra Energy Partners LP [49.9%]; Other [0.2%]		33.8055	-115.395	exact		Riverside County		California	https://gem.wiki/Desert_Sunlight_250_solar_farm	L808416	G810620	US65339F1012	0.499	248.9		11	2053	2093	2133	11.477	11.477	11.477	11.477	11.477	11.477	11.477	11.477	11.477	11.477	11.477	11.477
solar	United States	Americas	Northern America	Desert Sunlight 250 solar farm	16			39	operating	2013		PV						Clearway Energy Group [25.0%]; Harbert Power Fund V (HPF V) [24.9%]; NextEra Energy Partners LP [49.9%]; Other [0.2%]		33.8055	-115.395	exact		Riverside County		California	https://gem.wiki/Desert_Sunlight_250_solar_farm	L808416	G810621	US65339F1012	0.499	248.9		11	2053	2093	2133	19.461	19.461	19.461	19.461	19.461	19.461	19.461	19.461	19.461	19.461	19.461	19.461
solar	United States	Americas	Northern America	Desert Sunlight 250 solar farm	17			39	operating	2014		PV						Clearway Energy Group [25.0%]; Harbert Power Fund V (HPF V) [24.9%]; NextEra Energy Partners LP [49.9%]; Other [0.2%]		33.8055	-115.395	exact		Riverside County		California	https://gem.wiki/Desert_Sunlight_250_solar_farm	L808416	G810622	US65339F1012	0.499	248.9		10	2054	2094	2134	19.461	19.461	19.461	19.461	19.461	19.461	19.461	19.461	19.461	19.461	19.461	19.461
solar	United States	Americas	Northern America	Desert Sunlight 250 solar farm	18			26	operating	2014		PV						Clearway Energy Group [25.0%]; Harbert Power Fund V (HPF V) [24.9%]; NextEra Energy Partners LP [49.9%]; Other [0.2%]		33.8055	-115.395	exact		Riverside County		California	https://gem.wiki/Desert_Sunlight_250_solar_farm	L808416	G810623	US65339F1012	0.499	248.9		10	2054	2094	2134	12.974	12.974	12.974	12.974	12.974	12.974	12.974	12.974	12.974	12.974	12.974	12.974
solar	United States	Americas	Northern America	Desert Sunlight 250 solar farm	19			29	operating	2014		PV						Clearway Energy Group [25.0%]; Harbert Power Fund V (HPF V) [24.9%]; NextEra Energy Partners LP [49.9%]; Other [0.2%]		33.8055	-115.395	exact		Riverside County		California	https://gem.wiki/Desert_Sunlight_250_solar_farm	L808416	G810624	US65339F1012	0.499	248.9		10	2054	2094	2134	14.471	14.471	14.471	14.471	14.471	14.471	14.471	14.471	14.471	14.471	14.471	14.471
solar	United States	Americas	Northern America	Desert Sunlight 250 solar farm	20			25	operating	2014		PV						Clearway Energy Group [25.0%]; Harbert Power Fund V (HPF V) [24.9%]; NextEra Energy Partners LP [49.9%]; Other [0.2%]		33.8055	-115.395	exact		Riverside County		California	https://gem.wiki/Desert_Sunlight_250_solar_farm	L808416	G810625	US65339F1012	0.499	248.9		10	2054	2094	2134	12.475	12.475	12.475	12.475	12.475	12.475	12.475	12.475	12.475	12.475	12.475	12.475
solar	United States	Americas	Northern America	Desert Sunlight 250 solar farm	15			13.9	operating	2014		PV						Clearway Energy Group [25.0%]; Harbert Power Fund V (HPF V) [24.9%]; NextEra Energy Partners LP [49.9%]; Other [0.2%]		33.8055	-115.395	exact		Riverside County		California	https://gem.wiki/Desert_Sunlight_250_solar_farm	L808416	G815385	US65339F1012	0.499	248.9	248.9	10	2054	2094	2134	6.9361	6.9361	6.9361	6.9361	6.9361	6.9361	6.9361	6.9361	6.9361	6.9361	6.9361	6.9361
solar	United States	Americas	Northern America	Desert Sunlight 300 solar farm	1			20	operating	2013		PV						Clearway Energy Group [25.0%]; Harbert Power Fund V (HPF V) [24.9%]; NextEra Energy Partners LP [49.9%]; Other [0.2%]		33.8231	-115.394	exact		Riverside County		California	https://gem.wiki/Desert_Sunlight_300_solar_farm	L808417	G810626	US65339F1012	0.499	293		11	2053	2093	2133	9.98	9.98	9.98	9.98	9.98	9.98	9.98	9.98	9.98	9.98	9.98	9.98
solar	United States	Americas	Northern America	Desert Sunlight 300 solar farm	2			30	operating	2013		PV						Clearway Energy Group [25.0%]; Harbert Power Fund V (HPF V) [24.9%]; NextEra Energy Partners LP [49.9%]; Other [0.2%]		33.8231	-115.394	exact		Riverside County		California	https://gem.wiki/Desert_Sunlight_300_solar_farm	L808417	G810627	US65339F1012	0.499	293		11	2053	2093	2133	14.97	14.97	14.97	14.97	14.97	14.97	14.97	14.97	14.97	14.97	14.97	14.97
solar	United States	Americas	Northern America	Desert Sunlight 300 solar farm	3			30	operating	2013		PV						Clearway Energy Group [25.0%]; Harbert Power Fund V (HPF V) [24.9%]; NextEra Energy Partners LP [49.9%]; Other [0.2%]		33.8231	-115.394	exact		Riverside County		California	https://gem.wiki/Desert_Sunlight_300_solar_farm	L808417	G810628	US65339F1012	0.499	293		11	2053	2093	2133	14.97	14.97	14.97	14.97	14.97	14.97	14.97	14.97	14.97	14.97	14.97	14.97
solar	United States	Americas	Northern America	Desert Sunlight 300 solar farm	4			40	operating	2013		PV						Clearway Energy Group [25.0%]; Harbert Power Fund V (HPF V) [24.9%]; NextEra Energy Partners LP [49.9%]; Other [0.2%]		33.8231	-115.394	exact		Riverside County		California	https://gem.wiki/Desert_Sunlight_300_solar_farm	L808417	G810629	US65339F1012	0.499	293		11	2053	2093	2133	19.96	19.96	19.96	19.96	19.96	19.96	19.96	19.96	19.96	19.96	19.96	19.96
solar	United States	Americas	Northern America	Desert Sunlight 300 solar farm	5			40	operating	2013		PV						Clearway Energy Group [25.0%]; Harbert Power Fund V (HPF V) [24.9%]; NextEra Energy Partners LP [49.9%]; Other [0.2%]		33.8231	-115.394	exact		Riverside County		California	https://gem.wiki/Desert_Sunlight_300_solar_farm	L808417	G810630	US65339F1012	0.499	293		11	2053	2093	2133	19.96	19.96	19.96	19.96	19.96	19.96	19.96	19.96	19.96	19.96	19.96	19.96
solar	United States	Americas	Northern America	Desert Sunlight 300 solar farm	6			40	operating	2013		PV						Clearway Energy Group [25.0%]; Harbert Power Fund V (HPF V) [24.9%]; NextEra Energy Partners LP [49.9%]; Other [0.2%]		33.8231	-115.394	exact		Riverside County		California	https://gem.wiki/Desert_Sunlight_300_solar_farm	L808417	G810631	US65339F1012	0.499	293		11	2053	2093	2133	19.96	19.96	19.96	19.96	19.96	19.96	19.96	19.96	19.96	19.96	19.96	19.96
solar	United States	Americas	Northern America	Desert Sunlight 300 solar farm	10			23	operating	2014		PV						Clearway Energy Group [25.0%]; Harbert Power Fund V (HPF V) [24.9%]; NextEra Energy Partners LP [49.9%]; Other [0.2%]		33.8231	-115.394	exact		Riverside County		California	https://gem.wiki/Desert_Sunlight_300_solar_farm	L808417	G810635	US65339F1012	0.499	293		10	2054	2094	2134	11.477	11.477	11.477	11.477	11.477	11.477	11.477	11.477	11.477	11.477	11.477	11.477
solar	United States	Americas	Northern America	Desert Sunlight 300 solar farm	7			25	operating	2014		PV						Clearway Energy Group [25.0%]; Harbert Power Fund V (HPF V) [24.9%]; NextEra Energy Partners LP [49.9%]; Other [0.2%]		33.8231	-115.394	exact		Riverside County		California	https://gem.wiki/Desert_Sunlight_300_solar_farm	L808417	G810632	US65339F1012	0.499	293		10	2054	2094	2134	12.475	12.475	12.475	12.475	12.475	12.475	12.475	12.475	12.475	12.475	12.475	12.475
solar	United States	Americas	Northern America	Desert Sunlight 300 solar farm	8			20	operating	2014		PV						Clearway Energy Group [25.0%]; Harbert Power Fund V (HPF V) [24.9%]; NextEra Energy Partners LP [49.9%]; Other [0.2%]		33.8231	-115.394	exact		Riverside County		California	https://gem.wiki/Desert_Sunlight_300_solar_farm	L808417	G810633	US65339F1012	0.499	293		10	2054	2094	2134	9.98	9.98	9.98	9.98	9.98	9.98	9.98	9.98	9.98	9.98	9.98	9.98
solar	United States	Americas	Northern America	Desert Sunlight 300 solar farm	9			25	operating	2014		PV						Clearway Energy Group [25.0%]; Harbert Power Fund V (HPF V) [24.9%]; NextEra Energy Partners LP [49.9%]; Other [0.2%]		33.8231	-115.394	exact		Riverside County		California	https://gem.wiki/Desert_Sunlight_300_solar_farm	L808417	G810634	US65339F1012	0.499	293	293	10	2054	2094	2134	12.475	12.475	12.475	12.475	12.475	12.475	12.475	12.475	12.475	12.475	12.475	12.475
solar	United States	Americas	Northern America	Desoto Next Generation Solar Energy				25	operating	2009		PV						NextEra Energy INC		27.3232	-81.8019	exact		DeSoto County		Florida	https://gem.wiki/Desoto_Next_Generation_Solar_Energy	L804625	G805340	US65339F1012	1	25	25	15	2049	2089	2129	25	25	25	25	25	25	25	25	25	25	25	25
solar	United States	Americas	Northern America	Discovery Solar Center				74	operating	2021		PV						NextEra Energy INC		28.5289	-80.6789	exact	Titusville	Brevard County		Florida	https://gem.wiki/Discovery_Solar_Center	L804626	G805341	US65339F1012	1	74	74	3	2061	2101	2141	0	74	74	74	74	74	74	74	74	74	74	74
solar	United States	Americas	Northern America	Dodge Flat solar farm				200	operating	2022		PV						NextEra Energy INC		40.713	-119.467	exact	Reno	Washoe County		Nevada	https://gem.wiki/Dodge_Flat_solar_farm	L805179	G805970	US65339F1012	1	200	200	2	2062	2102	2142	0	0	200	200	200	200	200	200	200	200	200	200
solar	United States	Americas	Northern America	Dothan Solar Project			Houston County Solar Project	80	pre-construction	2023		PV						NextEra Energy INC		31.2307	-85.5347	approximate		Houston County		Alabama	https://gem.wiki/Dothan_Solar_Project	L805180	G805971	US65339F1012	1	80	80	1	2063	2103	2143	0	0	0	0	0	0	0	0	0	0	0	0
solar	United States	Americas	Northern America	Dougherty County Solar				120	operating	2019		PV						NextEra Energy INC		31.512	-84.0445	exact		Dougherty County		Georgia	https://gem.wiki/Dougherty_County_Solar	L805181	G805972	US65339F1012	1	120	120	5	2059	2099	2139	120	120	120	120	120	120	120	120	120	120	120	120
solar	United States	Americas	Northern America	Dunns Bridge solar farm	1			265	construction	2024		PV						NextEra Energy INC		41.1939	-86.9847	exact		Jasper County		Indiana	https://gem.wiki/Dunns_Bridge_solar_farm	L805182	G805974	US65339F1012	1	700		0	2064	2104	2144	0	0	0	0	265	265	265	265	265	265	265	265
solar	United States	Americas	Northern America	Dunns Bridge solar farm	2			435	pre-construction	2024		PV						NextEra Energy INC		41.1939	-86.9847	exact		Jasper County		Indiana	https://gem.wiki/Dunns_Bridge_solar_farm	L805182	G805973	US65339F1012	1	700	700	0	2064	2104	2144	0	0	0	0	0	0	0	0	0	0	0	0
solar	United States	Americas	Northern America	East Point Energy solar farm				50	shelved			PV						NextEra Energy INC		42.7569	-74.4928	approximate		Schoharie County		New York	https://gem.wiki/East_Point_Energy_solar_farm	L804627	G805342	US65339F1012	1	50	50	-99	40	80	120	0	0	0	0	0	0	0	0	0	0	0	0
solar	United States	Americas	Northern America	Echo River Solar				74	operating	2020		PV						NextEra Energy INC		30.2962	-82.8643	exact		Suwannee County		Florida	https://gem.wiki/Echo_River_Solar	L804628	G805343	US65339F1012	1	74		4	2060	2100	2140	74	74	74	74	74	74	74	74	74	74	74	74
solar	United States	Americas	Northern America	Egret Solar Center				74	operating	2020		PV						NextEra Energy INC		30.295	-82.186	exact		Baker County		Florida	https://gem.wiki/Egret_Solar_Center	L804629	G805344	US65339F1012	1	74	74	4	2060	2100	2140	74	74	74	74	74	74	74	74	74	74	74	74
solar	United States	Americas	Northern America	Elora Solar				150	operating	2022		PV						NextEra Energy INC		35.0601	-86.34	exact	Elora	Lincoln County		Tennessee	https://gem.wiki/Elora_Solar	L804630	G805345	US65339F1012	1	150	150	2	2062	2102	2142	0	0	150	150	150	150	150	150	150	150	150	150
solar	United States	Americas	Northern America	Eloy Valley Solar Project	1			200	pre-construction	2025		PV						NextEra Energy INC		32.7552	-111.554	approximate		Eloy County		Arizona	https://gem.wiki/Eloy_Valley_Solar_Project	L805365	G806195	US65339F1012	1	450		-1	2065	2105	2145	0	0	0	0	0	0	0	0	0	0	0	0
solar	United States	Americas	Northern America	Eloy Valley Solar Project	2			250	pre-construction	2025		PV						NextEra Energy		32.7283	-111.594	approximate		Pinal County		Arizona	https://gem.wiki/Eloy_Valley_Solar_Project	L805365	G838487	US65339F1012	1	450	450	-1	2065	2105	2145	0	0	0	0	0	0	0	0	0	0	0	0
solar	United States	Americas	Northern America	Esmeralda (NextEra) Solar Energy Center Project				500	pre-construction	2025		PV						NextEra Energy INC		37.8067	-117.642	approximate		Esmeralda County		Nevada	https://gem.wiki/Esmeralda_(NextEra)_Solar_Energy_Center_Project	L805183	G805975	US65339F1012	1	500	500	-1	2065	2105	2145	0	0	0	0	0	0	0	0	0	0	0	0
solar	United States	Americas	Northern America	Excelsior Energy solar farm				280	pre-construction			PV						NextEra Energy INC		43.0884	-75.257	approximate		Genesee County		New York	https://gem.wiki/Excelsior_Energy_solar_farm	L805184	G805976	US65339F1012	1	280	280	-99	40	80	120	0	0	0	0	0	0	0	0	0	0	0	0
solar	United States	Americas	Northern America	Farmington Solar				77	operating	2021		PV						NextEra Energy INC		44.6547	-70.1008	exact	Farmington	Franklin County		Maine	https://gem.wiki/Farmington_Solar	L804631	G805346	US65339F1012	1	77	77	3	2061	2101	2141	0	77	77	77	77	77	77	77	77	77	77	77
solar	United States	Americas	Northern America	Fish Springs Ranch solar farm	1			100	operating	2022		PV						NextEra Energy INC		40.0747	-119.974	exact	Reno	Washoe County		Nevada	https://gem.wiki/Fish_Springs_Ranch_solar_farm	L805186	G805978	US65339F1012	1	300		2	2062	2102	2142	0	0	100	100	100	100	100	100	100	100	100	100
solar	United States	Americas	Northern America	Fish Springs Ranch solar farm	2			200	pre-construction			PV						NextEra Energy INC		40.1041	-119.888	approximate		Washoe County		Nevada	https://gem.wiki/Fish_Springs_Ranch_solar_farm	L805186	G810648	US65339F1012	1	300	300	-99	40	80	120	0	0	0	0	0	0	0	0	0	0	0	0
solar	United States	Americas	Northern America	Fort Drum Energy Center solar farm				74	operating	2021		PV						NextEra Energy INC		27.616	-80.791	exact	Vero Beach	Okeechobee County		Florida	https://gem.wiki/Fort_Drum_Energy_Center_solar_farm	L804632	G805347	US65339F1012	1	74	74	3	2061	2101	2141	0	74	74	74	74	74	74	74	74	74	74	74
solar	United States	Americas	Northern America	Garnet Energy Solar			Cayuga Solar	200	pre-construction	2024		PV						NextEra Energy INC		43.1212	-76.648	approximate	Conquest			New York	https://gem.wiki/Garnet_Energy_Solar	L805187	G805979	US65339F1012	1	200	200	0	2064	2104	2144	0	0	0	0	0	0	0	0	0	0	0	0
solar	United States	Americas	Northern America	Genesis Solar Enegy Project	1			125	operating	2013		Solar Thermal						NextEra Energy INC		33.665	-114.998	exact		Riverside County		California	https://gem.wiki/Genesis_Solar_Enegy_Project	L808434	G810655	US65339F1012	1	250		11	2053	2093	2133	125	125	125	125	125	125	125	125	125	125	125	125
solar	United States	Americas	Northern America	Genesis Solar Enegy Project	2			125	operating	2014		Solar Thermal						NextEra Energy INC		33.665	-114.998	exact		Riverside County		California	https://gem.wiki/Genesis_Solar_Enegy_Project	L808434	G810656	US65339F1012	1	250	250	10	2054	2094	2134	125	125	125	125	125	125	125	125	125	125	125	125
solar	United States	Americas	Northern America	Grazing Yak Solar				35	operating	2019		PV						NextEra Energy INC		38.9778	-104.253	exact		El Paso County		Colorado	https://gem.wiki/Grazing_Yak_Solar	L804633	G805348	US65339F1012	1	35	35	5	2059	2099	2139	35	35	35	35	35	35	35	35	35	35	35	35
solar	United States	Americas	Northern America	Green River Solar				200	pre-construction	2025		PV						NextEra Energy INC		37.8771	-86.3072	approximate		Breckinridge County		Kentucky	https://gem.wiki/Green_River_Solar	L808439	G810661	US65339F1012	1	200	200	-1	2065	2105	2145	0	0	0	0	0	0	0	0	0	0	0	0
solar	United States	Americas	Northern America	Greensboro Solar Project				100	pre-construction			PV						NextEra Energy INC		39.9295	-85.3692	approximate		Henry County		Indiana	https://gem.wiki/Greensboro_Solar_Project	L805188	G805980	US65339F1012	1	100		-99	40	80	120	0	0	0	0	0	0	0	0	0	0	0	0
solar	United States	Americas	Northern America	Greenwood Solar			Culpepper Solar	100	pre-construction	2024		PV						NextEra Energy INC		38.4912	-77.9618	approximate		Culpeper County		Virginia	https://gem.wiki/Greenwood_Solar	L805372	G806202	US65339F1012	1	100	100	0	2064	2104	2144	0	0	0	0	0	0	0	0	0	0	0	0
solar	United States	Americas	Northern America	Hammock Solar				74	operating	2018		PV						NextEra Energy INC		26.6926	-81.325	exact		Hendry County		Florida	https://gem.wiki/Hammock_Solar	L804634	G805349	US65339F1012	1	74		6	2058	2098	2138	74	74	74	74	74	74	74	74	74	74	74	74
solar	United States	Americas	Northern America	Harmony (NextEra Energy) Solar	HFS		FMS Harmony Solar	74	operating	2020		PV						NextEra Energy INC		28.1553	-81.1083	exact		Osceola County		Florida	https://gem.wiki/Harmony_(NextEra_Energy)_Solar	L805189	G805981	US65339F1012	1	74		4	2060	2100	2140	74	74	74	74	74	74	74	74	74	74	74	74
solar	United States	Americas	Northern America	Hibiscus Solar Energy Center				74	operating	2020		PV						NextEra Energy INC		26.757	-80.334	exact		Palm Beach County		Florida	https://gem.wiki/Hibiscus_Solar_Energy_Center	L804635	G805350	US65339F1012	1	74	74	4	2060	2100	2140	74	74	74	74	74	74	74	74	74	74	74	74
solar	United States	Americas	Northern America	High River Energy solar farm				90	pre-construction	2024		PV						NextEra Energy INC		42.9019	-74.1327	approximate	Amsterdam	Montgomery County		New York	https://gem.wiki/High_River_Energy_solar_farm	L805190	G805982	US65339F1012	1	90	90	0	2064	2104	2144	0	0	0	0	0	0	0	0	0	0	0	0
solar	United States	Americas	Northern America	Horizon Solar Energy Center				74	operating	2018		PV						NextEra Energy INC		29.6656	-82.0583	exact		Putnam County		Florida	https://gem.wiki/Horizon_Solar_Energy_Center	L804636	G805351	US65339F1012	1	74		6	2058	2098	2138	74	74	74	74	74	74	74	74	74	74	74	74
solar	United States	Americas	Northern America	Indian River Solar Center				74	operating	2018		PV						NextEra Energy INC		27.5733	-80.5782	exact		Indian River County		Florida	https://gem.wiki/Indian_River_Solar_Center	L804637	G805352	US65339F1012	1	74	74	6	2058	2098	2138	74	74	74	74	74	74	74	74	74	74	74	74
solar	United States	Americas	Northern America	INEOS Hickerson solar farm				310	announced	2025		PV						NextEra Energy INC		31.9057	-97.6411	approximate		Bosque County		Texas	https://gem.wiki/INEOS_Hickerson_solar_farm	L832996	G838622	US65339F1012	1	310	310	-1	2065	2105	2145	0	0	0	0	0	0	0	0	0	0	0	0
solar	United States	Americas	Northern America	Interstate Solar Energy Center				74	operating	2019		PV						NextEra Energy INC		27.487	-80.443	exact		Saint Lucie County		Florida	https://gem.wiki/Interstate_Solar_Energy_Center	L804638	G805353	US65339F1012	1	74		5	2059	2099	2139	74	74	74	74	74	74	74	74	74	74	74	74
solar	United States	Americas	Northern America	Lakeside Solar Center				74	operating	2020		PV						NextEra Energy INC		27.2142	-80.7446	exact		Okeechobee County		Florida	https://gem.wiki/Lakeside_Solar_Center	L804639	G805354	US65339F1012	1	74	74	4	2060	2100	2140	74	74	74	74	74	74	74	74	74	74	74	74
solar	United States	Americas	Northern America	Live Oak Solar				51	operating	2016		PV						NextEra Energy INC		32.4238	-82.1028	exact		Candler County		Georgia	https://gem.wiki/Live_Oak_Solar	L805191	G805983	US65339F1012	1	51	51	8	2056	2096	2136	51	51	51	51	51	51	51	51	51	51	51	51
solar	United States	Americas	Northern America	Loggerhead Solar Energy Center				74	operating	2018		PV						NextEra Energy INC		27.2378	-80.5414	exact		Saint Lucie County		Florida	https://gem.wiki/Loggerhead_Solar_Energy_Center	L804640	G805355	US65339F1012	1	74		6	2058	2098	2138	74	74	74	74	74	74	74	74	74	74	74	74
solar	United States	Americas	Northern America	Magnolia Solar				74	operating	2021		PV						NextEra Energy INC		27.918	-82.05	exact	Mulberry	Polk County		Florida	https://gem.wiki/Magnolia_Solar	L804827	G805564	US65339F1012	1	74		3	2061	2101	2141	0	74	74	74	74	74	74	74	74	74	74	74
solar	United States	Americas	Northern America	Magnolia Springs Solar Center				74	operating	2021		PV						NextEra Energy INC		29.879	-81.696	exact	Green Cove Springs	Clay County		Florida	https://gem.wiki/Magnolia_Springs_Solar_Center	L804641	G805356	US65339F1012	1	74		3	2061	2101	2141	0	74	74	74	74	74	74	74	74	74	74	74
solar	United States	Americas	Northern America	Manatee Solar Energy Center				74	operating	2016		PV						NextEra Energy INC		27.6075	-82.3553	exact		Manatee County		Florida	https://gem.wiki/Manatee_Solar_Energy_Center	L804642	G805357	US65339F1012	1	74	74	8	2056	2096	2136	74	74	74	74	74	74	74	74	74	74	74	74
solar	United States	Americas	Northern America	Marshall Solar Energy Project				62	operating	2017		PV						NextEra Energy INC		44.4753	-95.669	exact		Lyon County		Minnesota	https://gem.wiki/Marshall_Solar_Energy_Project	L804643	G805358	US65339F1012	1	62	62	7	2057	2097	2137	62	62	62	62	62	62	62	62	62	62	62	62
solar	United States	Americas	Northern America	Mccoy Solar Energy Project Hybrid	4			31	operating	2015		PV						NextEra Energy INC		33.6947	-114.74	exact		Riverside County		California	https://gem.wiki/Mccoy_Solar_Energy_Project_Hybrid	L805193	G805987	US65339F1012	1	270		9	2055	2095	2135	31	31	31	31	31	31	31	31	31	31	31	31
solar	United States	Americas	Northern America	Mccoy Solar Energy Project Hybrid	5			31	operating	2015		PV						NextEra Energy INC		33.6947	-114.74	exact		Riverside County		California	https://gem.wiki/Mccoy_Solar_Energy_Project_Hybrid	L805193	G805986	US65339F1012	1	270		9	2055	2095	2135	31	31	31	31	31	31	31	31	31	31	31	31
solar	United States	Americas	Northern America	Mccoy Solar Energy Project Hybrid	6			27	operating	2015		PV						NextEra Energy INC		33.6947	-114.74	exact		Riverside County		California	https://gem.wiki/Mccoy_Solar_Energy_Project_Hybrid	L805193	G805985	US65339F1012	1	270		9	2055	2095	2135	27	27	27	27	27	27	27	27	27	27	27	27
solar	United States	Americas	Northern America	Mccoy Solar Energy Project Hybrid	8			36	operating	2015		PV						NextEra Energy INC		33.6947	-114.74	exact		Riverside County		California	https://gem.wiki/Mccoy_Solar_Energy_Project_Hybrid	L805193	G805988	US65339F1012	1	270		9	2055	2095	2135	36	36	36	36	36	36	36	36	36	36	36	36
solar	United States	Americas	Northern America	Mccoy Solar Energy Project Hybrid	1			42	operating	2016		PV						NextEra Energy INC		33.6947	-114.74	exact		Riverside County		California	https://gem.wiki/Mccoy_Solar_Energy_Project_Hybrid	L805193	G805992	US65339F1012	1	270		8	2056	2096	2136	42	42	42	42	42	42	42	42	42	42	42	42
solar	United States	Americas	Northern America	Mccoy Solar Energy Project Hybrid	2			21	operating	2016		PV						NextEra Energy INC		33.6947	-114.74	exact		Riverside County		California	https://gem.wiki/Mccoy_Solar_Energy_Project_Hybrid	L805193	G805989	US65339F1012	1	270		8	2056	2096	2136	21	21	21	21	21	21	21	21	21	21	21	21
solar	United States	Americas	Northern America	Mccoy Solar Energy Project Hybrid	3			40	operating	2016		PV						NextEra Energy INC		33.6947	-114.74	exact		Riverside County		California	https://gem.wiki/Mccoy_Solar_Energy_Project_Hybrid	L805193	G805990	US65339F1012	1	270		8	2056	2096	2136	40	40	40	40	40	40	40	40	40	40	40	40
solar	United States	Americas	Northern America	Mccoy Solar Energy Project Hybrid	7			42	operating	2016		PV						NextEra Energy INC		33.6947	-114.74	exact		Riverside County		California	https://gem.wiki/Mccoy_Solar_Energy_Project_Hybrid	L805193	G805991	US65339F1012	1	270	270	8	2056	2096	2136	42	42	42	42	42	42	42	42	42	42	42	42
solar	United States	Americas	Northern America	Miami Dade Solar Energy Center				74	operating	2019		PV						NextEra Energy INC		25.6401	-80.49	exact		Miami-Dade County		Florida	https://gem.wiki/Miami_Dade_Solar_Energy_Center	L804644	G805359	US65339F1012	1	74	74	5	2059	2099	2139	74	74	74	74	74	74	74	74	74	74	74	74
solar	United States	Americas	Northern America	Mountain View (NextEra) solar farm				20	operating	2014		PV						NextEra Energy INC		36.3906	-114.964	exact		Clark County		Nevada	https://gem.wiki/Mountain_View_(NextEra)_solar_farm	L804645	G805360	US65339F1012	1	20	20	10	2054	2094	2134	20	20	20	20	20	20	20	20	20	20	20	20
solar	United States	Americas	Northern America	Nassau Solar Center				74	operating	2020		PV						NextEra Energy INC		30.528	-81.895	exact		Nassau County		Florida	https://gem.wiki/Nassau_Solar_Center	L804646	G805361	US65339F1012	1	74	74	4	2060	2100	2140	74	74	74	74	74	74	74	74	74	74	74	74
solar	United States	Americas	Northern America	Neptune Energy Center Hybrid solar farm				325	construction	2023		PV						NextEra Energy INC		38.3303	-104.414	exact	Boone	Pueblo County		Colorado	https://gem.wiki/Neptune_Energy_Center_Hybrid_solar_farm	L804647	G805362	US65339F1012	1	325	325	1	2063	2103	2143	0	0	0	325	325	325	325	325	325	325	325	325
solar	United States	Americas	Northern America	Northern Preserve Solar				74	operating	2020		PV						NextEra Energy INC		30.232	-82.25	exact		Baker County		Florida	https://gem.wiki/Northern_Preserve_Solar	L804648	G805363	US65339F1012	1	74	74	4	2060	2100	2140	74	74	74	74	74	74	74	74	74	74	74	74
solar	United States	Americas	Northern America	Nutmeg Solar				19.6	operating	2020		PV						NextEra Energy INC		41.9748	-72.5108	exact	Enfield	Hartford		Connecticut	https://gem.wiki/Nutmeg_Solar	L808485	G810713	US65339F1012	1	19.6	19.6	4	2060	2100	2140	19.6	19.6	19.6	19.6	19.6	19.6	19.6	19.6	19.6	19.6	19.6	19.6
solar	United States	Americas	Northern America	Okeechobee Solar				74	operating	2020		PV						NextEra Energy INC		27.6304	-80.7948	exact		Okeechobee County		Florida	https://gem.wiki/Okeechobee_Solar	L804649	G805364	US65339F1012	1	74		4	2060	2100	2140	74	74	74	74	74	74	74	74	74	74	74	74
solar	United States	Americas	Northern America	Orange Blossom Solar Center				74	operating	2021		PV						NextEra Energy INC		27.5969	-80.5707	exact	Vero Beach	Indian River County		Florida	https://gem.wiki/Orange_Blossom_Solar_Center	L804650	G805365	US65339F1012	1	74		3	2061	2101	2141	0	74	74	74	74	74	74	74	74	74	74	74
solar	United States	Americas	Northern America	Palm Bay Solar				74	operating	2021		PV						NextEra Energy INC		27.857	-80.669	exact	Palm Bay	Brevard County		Florida	https://gem.wiki/Palm_Bay_Solar	L804651	G805366	US65339F1012	1	74		3	2061	2101	2141	0	74	74	74	74	74	74	74	74	74	74	74
solar	United States	Americas	Northern America	Pelican Solar Center				74	operating	2021		PV						NextEra Energy INC		27.543	-80.571	exact	Ft. Pierce	St Lucie County		Florida	https://gem.wiki/Pelican_Solar_Center	L804652	G805367	US65339F1012	1	74	74	3	2061	2101	2141	0	74	74	74	74	74	74	74	74	74	74	74
solar	United States	Americas	Northern America	Pinal Central Energy Center Hybrid solar farm				20	operating	2018		PV						NextEra Energy INC		32.8757	-111.551	exact		Pinal County		Arizona	https://gem.wiki/Pinal_Central_Energy_Center_Hybrid_solar_farm	L804653	G805368	US65339F1012	1	20	20	6	2058	2098	2138	20	20	20	20	20	20	20	20	20	20	20	20
solar	United States	Americas	Northern America	Pioneer Trail Solar Energy Center				74	operating	2019		PV						NextEra Energy INC		29.007	-81.098	exact		Volusia County		Florida	https://gem.wiki/Pioneer_Trail_Solar_Energy_Center	L804654	G805369	US65339F1012	1	74	74	5	2059	2099	2139	74	74	74	74	74	74	74	74	74	74	74	74
solar	United States	Americas	Northern America	Point Beach Solar				100	operating	2021		PV						NextEra Energy INC		44.2834	-87.5553	exact	Two Creeks	Manitowoc County		Wisconsin	https://gem.wiki/Point_Beach_Solar	L804655	G805370	US65339F1012	1	100	100	3	2061	2101	2141	0	100	100	100	100	100	100	100	100	100	100	100
solar	United States	Americas	Northern America	Proxmia Solar				190	pre-construction	2023		PV						NextEra Energy		37.4004	-121.163	approximate		Stanislaus County		California	https://gem.wiki/Proxmia_Solar	L833193	G838870	US65339F1012	1	190	190	1	2063	2103	2143	0	0	0	0	0	0	0	0	0	0	0	0
solar	United States	Americas	Northern America	Quinebaug Solar				49	operating	2021		PV						NextEra Energy INC		41.7499	-71.9325	exact	Canterbury	Windham County		Connecticut	https://gem.wiki/Quinebaug_Solar	L805195	G805994	US65339F1012	1	49	49	3	2061	2101	2141	0	49	49	49	49	49	49	49	49	49	49	49
solar	United States	Americas	Northern America	Quitman Solar	1			150	operating	2019		PV						NextEra Energy INC		30.849	-83.6433	exact		Brooks County		Georgia	https://gem.wiki/Quitman_Solar	L805196	G805995	US65339F1012	1	300		5	2059	2099	2139	150	150	150	150	150	150	150	150	150	150	150	150
solar	United States	Americas	Northern America	Quitman Solar	2			150	operating	2021		PV						NextEra Energy INC		30.862	-83.6517	exact	Quitman	Brooks County		Georgia	https://gem.wiki/Quitman_Solar	L805196	G806242	US65339F1012	1	300	300	3	2061	2101	2141	0	150	150	150	150	150	150	150	150	150	150	150
solar	United States	Americas	Northern America	Resurgence Solar	1&2			138	pre-construction	2023		PV						NextEra Energy INC		35.0066	-117.545	approximate	Boron	San Bernardino County		California	https://gem.wiki/Resurgence_Solar	L804656	G805371	US65339F1012	1	138	138	1	2063	2103	2143	0	0	0	0	0	0	0	0	0	0	0	0
solar	United States	Americas	Northern America	River Bend Solar				75	operating	2016		PV						NextEra Energy INC		34.8315	-87.8422	exact		Lauderdale County		Alabama	https://gem.wiki/River_Bend_Solar	L804657	G805372	US65339F1012	1	75	75	8	2056	2096	2136	75	75	75	75	75	75	75	75	75	75	75	75
solar	United States	Americas	Northern America	Rodeo Solar Center				74	operating	2021		PV						NextEra Energy INC		27.3206	-81.8102	exact	Arcadia	DeSoto County		Florida	https://gem.wiki/Rodeo_Solar_Center	L804658	G805373	US65339F1012	1	74	74	3	2061	2101	2141	0	74	74	74	74	74	74	74	74	74	74	74
solar	United States	Americas	Northern America	Roswell Solar				70	operating	2016		PV						NextEra Energy INC		33.4529	-104.461	exact	Roswell	Chaves County		New Mexico	https://gem.wiki/Roswell_Solar	L804659	G805374	US65339F1012	1	70	70	8	2056	2096	2136	70	70	70	70	70	70	70	70	70	70	70	70
solar	United States	Americas	Northern America	Route 66 Energy Center solar farm				50	operating	2022		PV						NextEra Energy INC		35.0984	-107.615	exact	San Fidel	Cibola County		New Mexico	https://gem.wiki/Route_66_Energy_Center_solar_farm	L805197	G805996	US65339F1012	1	50	50	2	2062	2102	2142	0	0	50	50	50	50	50	50	50	50	50	50
solar	United States	Americas	Northern America	Sabal Palm Solar Center				74	operating	2021		PV						NextEra Energy INC		26.7827	-80.3526	exact	Loxahatchee	Palm Beach County		Florida	https://gem.wiki/Sabal_Palm_Solar_Center	L804660	G805375	US65339F1012	1	74	74	3	2061	2101	2141	0	74	74	74	74	74	74	74	74	74	74	74
solar	United States	Americas	Northern America	Saint Solar				100	operating	2021		PV						NextEra Energy INC		32.8663	-111.502	exact	Coolidge	Pinal County		Arizona	https://gem.wiki/Saint_Solar	L804661	G805376	US65339F1012	1	100	100	3	2061	2101	2141	0	100	100	100	100	100	100	100	100	100	100	100
solar	United States	Americas	Northern America	Sanford Solar				49	operating	2020		PV						NextEra Energy INC		43.387	-70.711	exact	Sanford	York County		Maine	https://gem.wiki/Sanford_Solar	L805198	G805997	US65339F1012	1	49	49	4	2060	2100	2140	49	49	49	49	49	49	49	49	49	49	49	49
solar	United States	Americas	Northern America	Shafter Solar				20	operating	2015		PV						NextEra Energy INC		35.451	-119.128	exact	Bakersfield	Kern County		California	https://gem.wiki/Shafter_Solar	L804662	G805377	US65339F1012	1	20	20	9	2055	2095	2135	20	20	20	20	20	20	20	20	20	20	20	20
solar	United States	Americas	Northern America	Shaw Creek Solar				75	operating	2019		PV						NextEra Energy INC		33.6747	-81.7544	exact		Aiken County		South Carolina	https://gem.wiki/Shaw_Creek_Solar	L804663	G805378	US65339F1012	1	75	75	5	2059	2099	2139	75	75	75	75	75	75	75	75	75	75	75	75
solar	United States	Americas	Northern America	Silver State Solar Power South	1			26	operating	2015		PV						NextEra Energy INC		35.604	-115.341	exact		Clark County		Nevada	https://gem.wiki/Silver_State_Solar_Power_South	L805199	G805999	US65339F1012	1	260		9	2055	2095	2135	26	26	26	26	26	26	26	26	26	26	26	26
solar	United States	Americas	Northern America	Silver State Solar Power South	2			28	operating	2015		PV						NextEra Energy INC		35.604	-115.341	exact		Clark County		Nevada	https://gem.wiki/Silver_State_Solar_Power_South	L805199	G806000	US65339F1012	1	260		9	2055	2095	2135	28	28	28	28	28	28	28	28	28	28	28	28
solar	United States	Americas	Northern America	Silver State Solar Power South	3			37	operating	2015		PV						NextEra Energy INC		35.604	-115.341	exact		Clark County		Nevada	https://gem.wiki/Silver_State_Solar_Power_South	L805199	G806005	US65339F1012	1	260		9	2055	2095	2135	37	37	37	37	37	37	37	37	37	37	37	37
solar	United States	Americas	Northern America	Silver State Solar Power South	4			36	operating	2016		PV						NextEra Energy INC		35.604	-115.341	exact		Clark County		Nevada	https://gem.wiki/Silver_State_Solar_Power_South	L805199	G806003	US65339F1012	1	260		8	2056	2096	2136	36	36	36	36	36	36	36	36	36	36	36	36
solar	United States	Americas	Northern America	Silver State Solar Power South	5			35	operating	2016		PV						NextEra Energy INC		35.604	-115.341	exact		Clark County		Nevada	https://gem.wiki/Silver_State_Solar_Power_South	L805199	G806001	US65339F1012	1	260		8	2056	2096	2136	35	35	35	35	35	35	35	35	35	35	35	35
solar	United States	Americas	Northern America	Silver State Solar Power South	6			37	operating	2016		PV						NextEra Energy INC		35.604	-115.341	exact		Clark County		Nevada	https://gem.wiki/Silver_State_Solar_Power_South	L805199	G806004	US65339F1012	1	260		8	2056	2096	2136	37	37	37	37	37	37	37	37	37	37	37	37
solar	United States	Americas	Northern America	Silver State Solar Power South	7			35	operating	2016		PV						NextEra Energy INC		35.604	-115.341	exact		Clark County		Nevada	https://gem.wiki/Silver_State_Solar_Power_South	L805199	G806002	US65339F1012	1	260		8	2056	2096	2136	35	35	35	35	35	35	35	35	35	35	35	35
solar	United States	Americas	Northern America	Silver State Solar Power South	8			26	operating	2016		PV						NextEra Energy INC		35.604	-115.341	exact		Clark County		Nevada	https://gem.wiki/Silver_State_Solar_Power_South	L805199	G805998	US65339F1012	1	260	260	8	2056	2096	2136	26	26	26	26	26	26	26	26	26	26	26	26
solar	United States	Americas	Northern America	Skeleton Creek solar farm			Skeleton Creek Energy Center Hybrid	250	pre-construction	2025		PV						NextEra Energy INC		36.5214	-98.0344	approximate	Carrier	Garfield County		Oklahoma	https://gem.wiki/Skeleton_Creek_solar_farm	L805200	G806006	US65339F1012	1	250	250	-1	2065	2105	2145	0	0	0	0	0	0	0	0	0	0	0	0
solar	United States	Americas	Northern America	Solar Electric Generating Station	3			30	retired	1986	2021	Solar Thermal						NextEra Energy INC		35.0069	-117.556	exact		San Bernardino County		California	https://gem.wiki/Solar_Electric_Generating_Station	L808533	G810769	US65339F1012	1	310		38	2026	2066	2106	30	0	0	0	0	0	0	0	0	0	0	0
solar	United States	Americas	Northern America	Solar Electric Generating Station	4			30	retired	1986	2021	Solar Thermal						NextEra Energy INC		35.0122	-117.556	exact		San Bernardino County		California	https://gem.wiki/Solar_Electric_Generating_Station	L808533	G810770	US65339F1012	1	310		38	2026	2066	2106	30	0	0	0	0	0	0	0	0	0	0	0
solar	United States	Americas	Northern America	Solar Electric Generating Station	5			30	retired	1987	2021	Solar Thermal						NextEra Energy INC		35.0195	-117.555	exact		San Bernardino County		California	https://gem.wiki/Solar_Electric_Generating_Station	L808533	G810771	US65339F1012	1	310		37	2027	2067	2107	30	0	0	0	0	0	0	0	0	0	0	0
solar	United States	Americas	Northern America	Solar Electric Generating Station	6			30	retired	1988	2021	Solar Thermal						NextEra Energy INC		35.021	-117.566	exact		San Bernardino County		California	https://gem.wiki/Solar_Electric_Generating_Station	L808533	G810772	US65339F1012	1	310		36	2028	2068	2108	30	0	0	0	0	0	0	0	0	0	0	0
solar	United States	Americas	Northern America	Solar Electric Generating Station	7			30	retired	1988	2021	Solar Thermal						NextEra Energy INC		35.0148	-117.566	exact		San Bernardino County		California	https://gem.wiki/Solar_Electric_Generating_Station	L808533	G810773	US65339F1012	1	310		36	2028	2068	2108	30	0	0	0	0	0	0	0	0	0	0	0
solar	United States	Americas	Northern America	Solar Electric Generating Station	8			80	retired	1989	2021	Solar Thermal						NextEra Energy INC		35.0308	-117.356	exact		San Bernardino County		California	https://gem.wiki/Solar_Electric_Generating_Station	L808533	G810774	US65339F1012	1	310		35	2029	2069	2109	80	0	0	0	0	0	0	0	0	0	0	0
solar	United States	Americas	Northern America	Solar Electric Generating Station	9			80	operating	1990		Solar Thermal						NextEra Energy INC		35.033	-117.338	exact		San Bernardino County		California	https://gem.wiki/Solar_Electric_Generating_Station	L808533	G810775	US65339F1012	1	310	310	34	2030	2070	2110	80	80	80	80	80	80	80	80	80	80	80	80
solar	United States	Americas	Northern America	Sonoran Energy Center solar farm			Sonoran Solar	260	pre-construction	2023		PV						NextEra Energy INC		33.3703	-112.584	approximate	Buckeye			Arizona	https://gem.wiki/Sonoran_Energy_Center_solar_farm	L805201	G806007	US65339F1012	1	260	260	1	2063	2103	2143	0	0	0	0	0	0	0	0	0	0	0	0
solar	United States	Americas	Northern America	Southfork Solar				74	operating	2020		PV						NextEra Energy INC		27.5732	-82.1914	exact		Manatee County		Florida	https://gem.wiki/Southfork_Solar	L804664	G805379	US65339F1012	1	74	74	4	2060	2100	2140	74	74	74	74	74	74	74	74	74	74	74	74
solar	United States	Americas	Northern America	Storey Solar Energy			Storey Energy Center	88	pre-construction	2023		PV						NextEra Energy INC		32.8882	-111.498	approximate	Coolidge	Pinal County		Arizona	https://gem.wiki/Storey_Solar_Energy	L805202	G806008	US65339F1012	1	88	88	1	2063	2103	2143	0	0	0	0	0	0	0	0	0	0	0	0
solar	United States	Americas	Northern America	Stuttgart Solar				81	operating	2018		PV						NextEra Energy INC		34.4397	-91.44	exact		Arkansas County		Arkansas	https://gem.wiki/Stuttgart_Solar	L804461	G805128	US65339F1012	1	81	81	6	2058	2098	2138	81	81	81	81	81	81	81	81	81	81	81	81
solar	United States	Americas	Northern America	Sunshine Gateway Solar Energy Center				74	operating	2019		PV						NextEra Energy INC		30.28	-82.778	exact		Columbia County		Florida	https://gem.wiki/Sunshine_Gateway_Solar_Energy_Center	L804665	G805380	US65339F1012	1	74		5	2059	2099	2139	74	74	74	74	74	74	74	74	74	74	74	74
solar	United States	Americas	Northern America	Sweetbay Solar Center				74	operating	2020		PV						NextEra Energy INC		27.0601	-80.4745	exact		Martin County		Florida	https://gem.wiki/Sweetbay_Solar_Center	L804666	G805381	US65339F1012	1	74	74	4	2060	2100	2140	74	74	74	74	74	74	74	74	74	74	74	74
solar	United States	Americas	Northern America	Talladega Solar Project				80	pre-construction	2023		PV						NextEra Energy INC		33.3967	-86.1597	approximate		Talladega County		Alabama	https://gem.wiki/Talladega_Solar_Project	L805203	G806009	US65339F1012	1	80	80	1	2063	2103	2143	0	0	0	0	0	0	0	0	0	0	0	0
solar	United States	Americas	Northern America	Taylor Creek Solar			FMS Taylor Creek	74	operating	2020		PV						NextEra Energy INC		28.5035	-81.0483	exact		Orange County		Florida	https://gem.wiki/Taylor_Creek_Solar	L805204	G806010	US65339F1012	1	74	74	4	2060	2100	2140	74	74	74	74	74	74	74	74	74	74	74	74
solar	Spain	Europe	Southern Europe	Termosol 1 CSP solar farm				49.9	operating	2013		Solar Thermal						NextEra Energy; FPL Energy		39.192	-5.5864	exact		Miajadas	Badajoz	Extremadura	https://gem.wiki/Termosol_1_CSP_solar_farm	L824898	G828149	US65339F1012	0.5	49.9		11	2053	2093	2133	24.95	24.95	24.95	24.95	24.95	24.95	24.95	24.95	24.95	24.95	24.95	24.95
solar	Spain	Europe	Southern Europe	Termosol 2 CSP solar farm				49.9	operating	2013		Solar Thermal						NextEra Energy; FPL Energy		39.1748	-5.5979	exact		Miajadas	Cáceres	Extremadura	https://gem.wiki/Termosol_2_CSP_solar_farm	L824899	G828150	US65339F1012	0.5	49.9	49.9	11	2053	2093	2133	24.95	24.95	24.95	24.95	24.95	24.95	24.95	24.95	24.95	24.95	24.95	24.95
solar	United States	Americas	Northern America	Thunder Wolf Energy Center Hybrid solar farm				248	operating	2023		PV						NextEra Energy INC		38.1899	-104.398	exact	Avondale	Pueblo County		Colorado	https://gem.wiki/Thunder_Wolf_Energy_Center_Hybrid_solar_farm	L805205	G806011	US65339F1012	1	248	248	1	2063	2103	2143	0	0	0	248	248	248	248	248	248	248	248	248
solar	United States	Americas	Northern America	Titan (Colorado) solar farm				50	operating	2018		PV						NextEra Energy INC		39.6865	-104.014	exact		Arapahoe County		Colorado	https://gem.wiki/Titan_(Colorado)_solar_farm	L805206	G806012	US65339F1012	1	50	50	6	2058	2098	2138	50	50	50	50	50	50	50	50	50	50	50	50
solar	United States	Americas	Northern America	Titan (Texas) Solar Project			Titan Culberson	260	operating	2021		PV						NextEra Energy INC		31.7004	-104.458	exact	Van Horn	Culberson County		Texas	https://gem.wiki/Titan_(Texas)_Solar_Project	L805207	G806013	US65339F1012	1	260	260	3	2061	2101	2141	0	260	260	260	260	260	260	260	260	260	260	260
solar	United States	Americas	Northern America	Trailside Solar Center				74	operating	2020		PV						NextEra Energy INC		29.775	-81.4279	exact		Saint Johns County		Florida	https://gem.wiki/Trailside_Solar_Center	L804667	G805382	US65339F1012	1	74	74	4	2060	2100	2140	74	74	74	74	74	74	74	74	74	74	74	74
solar	United States	Americas	Northern America	Trelina Solar				80	pre-construction			PV						NextEra Energy INC		42.893	-76.948	approximate	Waterloo	Seneca County		New York	https://gem.wiki/Trelina_Solar	L805430	G806262	US65339F1012	1	80	80	-99	40	80	120	0	0	0	0	0	0	0	0	0	0	0	0
solar	United States	Americas	Northern America	Twin Lakes solar farm				74	operating	2020		PV						NextEra Energy INC		29.6122	-81.8445	exact		Putnam County		Florida	https://gem.wiki/Twin_Lakes_solar_farm	L804668	G805383	US65339F1012	1	74		4	2060	2100	2140	74	74	74	74	74	74	74	74	74	74	74	74
solar	United States	Americas	Northern America	Union Springs Solar Center				74	operating	2020		PV						NextEra Energy INC		30.001	-82.299	exact		Union County		Florida	https://gem.wiki/Union_Springs_Solar_Center	L804669	G805384	US65339F1012	1	74	74	4	2060	2100	2140	74	74	74	74	74	74	74	74	74	74	74	74
solar	United States	Americas	Northern America	Valley Farms Solar				200	pre-construction	2023		PV						NextEra Energy INC		32.8966	-111.756	approximate	Pinal			Arizona	https://gem.wiki/Valley_Farms_Solar	L805208	G806014	US65339F1012	1	200	200	1	2063	2103	2143	0	0	0	0	0	0	0	0	0	0	0	0
solar	United States	Americas	Northern America	Waco Solar				400	construction	2024		PV						NextEra Energy		31.7104	-96.8187	exact		Limestone County		Texas	https://gem.wiki/Waco_Solar	L833370	G839095	US65339F1012	1	400	400	0	2064	2104	2144	0	0	0	0	400	400	400	400	400	400	400	400
solar	United States	Americas	Northern America	Wadley Solar				260	construction	2024		PV						NextEra Energy INC		32.8666	-82.4041	approximate		Jefferson County		Georgia	https://gem.wiki/Wadley_Solar	L808546	G810790	US65339F1012	1	260	260	0	2064	2104	2144	0	0	0	0	260	260	260	260	260	260	260	260
solar	United States	Americas	Northern America	Wagon Trail Solar				500	pre-construction			PV						NextEra Energy INC		45.3609	-119.605	approximate		Morrow County		Oregon	https://gem.wiki/Wagon_Trail_Solar	L805209	G806015	US65339F1012	1	500	500	-99	40	80	120	0	0	0	0	0	0	0	0	0	0	0	0
solar	United States	Americas	Northern America	West Gardner Solar				320	pre-construction	2024		PV						NextEra Energy INC		38.81	-95.035	approximate		Johnson County		Kansas	https://gem.wiki/West_Gardner_Solar	L805210	G806016	US65339F1012	1	320	320	0	2064	2104	2144	0	0	0	0	0	0	0	0	0	0	0	0
solar	United States	Americas	Northern America	West Memphis Solar				180	announced	2024		PV						NextEra Energy INC		35.1569	-90.3105	approximate		Crittenden County		Arkansas	https://gem.wiki/West_Memphis_Solar	L808552	G810796	US65339F1012	1	180	180	0	2064	2104	2144	0	0	0	0	0	0	0	0	0	0	0	0
solar	United States	Americas	Northern America	Westside (NextEra) solar farm				20	operating	2017		PV						NextEra Energy INC		36.3818	-120.135	exact		Fresno County		California	https://gem.wiki/Westside_(NextEra)_solar_farm	L804670	G805385	US65339F1012	1	20	20	7	2057	2097	2137	20	20	20	20	20	20	20	20	20	20	20	20
solar	United States	Americas	Northern America	Wheatridge Hybrid solar farm			Wheatridge Renewable	50	operating	2022		PV						NextEra Energy INC		45.557	-119.612	exact	Morrow	Morrow County		Oregon	https://gem.wiki/Wheatridge_Hybrid_solar_farm	L804671	G805386	US65339F1012	1	50	50	2	2062	2102	2142	0	0	50	50	50	50	50	50	50	50	50	50
solar	United States	Americas	Northern America	White Oak Solar				76	operating	2016		PV						NextEra Energy INC		33.0368	-82.1113	exact		Burke County		Georgia	https://gem.wiki/White_Oak_Solar	L805211	G806017	US65339F1012	1	76	76	8	2056	2096	2136	76	76	76	76	76	76	76	76	76	76	76	76
solar	United States	Americas	Northern America	White Pine Solar				101	operating	2016		PV						NextEra Energy INC		32.506	-84.257	exact		Taylor County		Georgia	https://gem.wiki/White_Pine_Solar	L804672	G805387	US65339F1012	1	101	101	8	2056	2096	2136	101	101	101	101	101	101	101	101	101	101	101	101
solar	United States	Americas	Northern America	Whitney Point Solar				20	operating	2017		PV						NextEra Energy INC		36.3769	-120.138	exact		Fresno County		California	https://gem.wiki/Whitney_Point_Solar	L804673	G805388	US65339F1012	1	20	20	7	2057	2097	2137	20	20	20	20	20	20	20	20	20	20	20	20
solar	United States	Americas	Northern America	Wildflower Solar Energy Center				74	operating	2018		PV						NextEra Energy INC		27.3162	-81.7839	exact		DeSoto County		Florida	https://gem.wiki/Wildflower_Solar_Energy_Center	L804674	G805389	US65339F1012	1	74		6	2058	2098	2138	74	74	74	74	74	74	74	74	74	74	74	74
solar	United States	Americas	Northern America	Willow Solar Energy Center				74	operating	2021		PV						NextEra Energy INC		27.4481	-82.0807	exact	Myakka City	Manatee County		Florida	https://gem.wiki/Willow_Solar_Energy_Center	L804675	G805390	US65339F1012	1	74	74	3	2061	2101	2141	0	74	74	74	74	74	74	74	74	74	74	74
solar	United States	Americas	Northern America	Wilmot Energy Center solar farm			Wilmot West Grant	130	operating	2021		PV						NextEra Energy INC		32.0435	-110.893	exact	Tucson	Pima County		Arizona	https://gem.wiki/Wilmot_Energy_Center_solar_farm	L804676	G805391	US65339F1012	1	130	130	3	2061	2101	2141	0	130	130	130	130	130	130	130	130	130	130	130
solar	United States	Americas	Northern America	Yellow Pine Solar Project	1			125	operating	2023		PV						NextEra Energy INC		36.0661	-115.775	exact		Clarke County		Nevada	https://gem.wiki/Yellow_Pine_Solar_Project	L805435	G806267	US65339F1012	1	125	125	1	2063	2103	2143	0	0	0	125	125	125	125	125	125	125	125	125
solar	United States	Americas	Northern America	Yum Yum Solar				147	construction	2024		PV						Invenergy; NextEra Energy		35.2525	-89.2514	exact	Yum Yum	Fayette County		Tennessee	https://gem.wiki/Yum_Yum_Solar	L804561	G805246	US65339F1012	0.5	147	147	0	2064	2104	2144	0	0	0	0	73.5	73.5	73.5	73.5	73.5	73.5	73.5	73.5
wind	Canada	Americas	Northern America	Adelaide Wind Energy Centre			Adelaide Nextera wind farm	60	operating	2014		onshore						NextEra Energy INC		43.0203	-81.7131	exact	Adelaide Metcalfe	Middlesex County	Southwestern Ontario	Ontario	https://gem.wiki/Adelaide_Wind_Energy_Centre	L906735	G909071	US65339F1012	1	60	60	10	2054	2094	2134	60	60	60	60	60	60	60	60	60	60	60	60
wind	United States	Americas	Northern America	Appaloosa Run Wind	1			172	operating	2022		onshore						NextEra Energy INC		31.1599	-101.873	exact		Upton County		Texas	https://gem.wiki/Appaloosa_Run_Wind	L907142	G909622	US65339F1012	1	172	172	2	2062	2102	2142	0	0	172	172	172	172	172	172	172	172	172	172
wind	United States	Americas	Northern America	Ashtabula Wind Center	1		FPL Energy Ashtabula Wind	196	operating	2008		onshore						NextEra Energy INC		47.0695	-97.8848	exact		Barnes County		North Dakota	https://gem.wiki/Ashtabula_Wind_Center	L906762	G909871	US65339F1012	1	196	196	16	2048	2088	2128	196	196	196	196	196	196	196	196	196	196	196	196
wind	United States	Americas	Northern America	Babbitt Ranch Wind Project	1			161	construction	2024		onshore						NextEra Energy INC		35.6277	-111.868	exact		Coconino County		Arizona	https://gem.wiki/Babbitt_Ranch_Wind_Project	L907263	G909785	US65339F1012	1	161	161	0	2064	2104	2144	0	0	0	0	161	161	161	161	161	161	161	161
wind	United States	Americas	Northern America	Baldwin Wind Energy Center	RP			102	operating	2020		onshore						NextEra Energy INC		47.0783	-100.657	exact					https://gem.wiki/Baldwin_Wind_Energy_Center	L907045	G927235	US65339F1012	1	102	102	4	2060	2100	2140	102	102	102	102	102	102	102	102	102	102	102	102
wind	United States	Americas	Northern America	Blackwell wind farm	1		Cowboy Wind Farm, Nextera-Blackwell	60	operating	2012		onshore						NextEra Energy INC		36.8646	-97.4251	exact		Kay County		Oklahoma	https://gem.wiki/Blackwell_wind_farm	L906732	G909068	US65339F1012	1	60	60	12	2052	2092	2132	60	60	60	60	60	60	60	60	60	60	60	60
wind	United States	Americas	Northern America	Blue Summit wind farm	1			135	operating	2012		onshore						NextEra Energy INC		34.3486	-99.3892	exact		Wilbarger County		Texas	https://gem.wiki/Blue_Summit_wind_farm	L906972	G909627	US65339F1012	1	434		12	2052	2092	2132	135	135	135	135	135	135	135	135	135	135	135	135
wind	United States	Americas	Northern America	Blue Summit wind farm	2			99	operating	2018		onshore						NextEra Energy INC		34.2054	-99.4781	exact		Hardeman County		Texas	https://gem.wiki/Blue_Summit_wind_farm	L906972	G909386	US65339F1012	1	434		6	2058	2098	2138	99	99	99	99	99	99	99	99	99	99	99	99
wind	United States	Americas	Northern America	Blue Summit wind farm	3			200	operating	2019		onshore						NextEra Energy INC		34.1569	-99.5354	exact		Hardeman County		Texas	https://gem.wiki/Blue_Summit_wind_farm	L906972	G909977	US65339F1012	1	434	434	5	2059	2099	2139	200	200	200	200	200	200	200	200	200	200	200	200
wind	United States	Americas	Northern America	Bluff Point Wind Facility	1			120	operating	2017		onshore						NextEra Energy INC		40.3029	-84.9315	exact		Randolph County		Indiana	https://gem.wiki/Bluff_Point_Wind_Facility	L907093	G909550	US65339F1012	1	120	120	7	2057	2097	2137	120	120	120	120	120	120	120	120	120	120	120	120
wind	United States	Americas	Northern America	Borderlands wind farm	1			100	operating	2021		onshore						NextEra Energy INC		34.1031	-108.908	exact		Catron County		New Mexico	https://gem.wiki/Borderlands_wind_farm	L906976	G909390	US65339F1012	1	100	100	3	2061	2101	2141	0	100	100	100	100	100	100	100	100	100	100	100
wind	Canada	Americas	Northern America	Bornish Wind Energy Centre				73	operating	2014		onshore						NextEra Energy INC		43.138	-81.7381	exact	North Middlesex	Middlesex County	Southwestern Ontario	Ontario	https://gem.wiki/Bornish_Wind_Energy_Centre	L906813	G909171	US65339F1012	1	73	73	10	2054	2094	2134	73	73	73	73	73	73	73	73	73	73	73	73
wind	United States	Americas	Northern America	Brady wind farm	1			150	operating	2016		onshore						NextEra Energy INC		46.6851	-102.636	exact		Stark County		North Dakota	https://gem.wiki/Brady_wind_farm	L907181	G909691	US65339F1012	1	299		8	2056	2096	2136	150	150	150	150	150	150	150	150	150	150	150	150
wind	United States	Americas	Northern America	Brady wind farm	2			149	operating	2016		onshore						NextEra Energy INC		46.6272	-102.839	exact		Hettinger County		North Dakota	https://gem.wiki/Brady_wind_farm	L907181	G909679	US65339F1012	1	299	299	8	2056	2096	2136	149	149	149	149	149	149	149	149	149	149	149	149
wind	United States	Americas	Northern America	Breckinridge wind farm	1			98	operating	2015		onshore						NextEra Energy INC		36.4496	-97.6273	exact		Garfield County		Oklahoma	https://gem.wiki/Breckinridge_wind_farm	L906934	G909334	US65339F1012	1	98	98	9	2055	2095	2135	98	98	98	98	98	98	98	98	98	98	98	98
wind	United States	Americas	Northern America	Bronco Plains wind farm	1			299	operating	2020		onshore						NextEra Energy INC		39.0463	-102.944	exact		Kit Carson County		Colorado	https://gem.wiki/Bronco_Plains_wind_farm	L907561	G910197	US65339F1012	1	499		4	2060	2100	2140	299	299	299	299	299	299	299	299	299	299	299	299
wind	United States	Americas	Northern America	Bronco Plains wind farm	2			200	announced			onshore						NextEra Energy INC		39.184	-102.97	approximate					https://gem.wiki/Bronco_Plains_wind_farm	L907561	G927240	US65339F1012	1	499	499	-99	40	80	120	0	0	0	0	0	0	0	0	0	0	0	0
wind	United States	Americas	Northern America	Brookfield Tehachapi wind farm	1		Coram Wind	102	operating	2012		onshore						NextEra Energy INC		35.0644	-118.335	exact		Kern County		California	https://gem.wiki/Brookfield_Tehachapi_wind_farm	L906439	G909464	US65339F1012	1	102	102	12	2052	2092	2132	102	102	102	102	102	102	102	102	102	102	102	102
wind	United States	Americas	Northern America	Buffalo Ridge Windplant WPP 1993	RP1			109	operating	2022		onshore						NextEra Energy INC		44.2169	-96.2454	exact		Lincoln County		Minnesota	https://gem.wiki/Buffalo_Ridge_Windplant_WPP_1993	L906456	G909515	US65339F1012	1	109	109	2	2062	2102	2142	0	0	109	109	109	109	109	109	109	109	109	109
wind	United States	Americas	Northern America	Butler Ridge wind farm	1			54	operating	2009		onshore						NextEra Energy INC		43.4023	-88.4777	exact		Dodge County		Wisconsin	https://gem.wiki/Butler_Ridge_wind_farm	L906713	G909041	US65339F1012	1	54	54	15	2049	2089	2129	54	54	54	54	54	54	54	54	54	54	54	54
wind	United States	Americas	Northern America	Cabazon wind farm	2		Cabazon Wind Partners	41	operating	2002		onshore						NextEra Energy INC		33.9166	-116.729	exact		Riverside County		California	https://gem.wiki/Cabazon_wind_farm	L906602	G908926	US65339F1012	1	41	41	22	2042	2082	2122	41	41	41	41	41	41	41	41	41	41	41	41
wind	United States	Americas	Northern America	Callahan Divide wind farm	RP			114	operating	2017		onshore						NextEra Energy INC		32.3075	-100.029	exact					https://gem.wiki/Callahan_Divide_wind_farm	L907082	G927243	US65339F1012	1	114	114	7	2057	2097	2137	114	114	114	114	114	114	114	114	114	114	114	114
wind	United States	Americas	Northern America	Capricorn Ridge Wind Energy Center	RP1			362	operating	2017		onshore						NextEra Energy		31.8627	-100.927	exact					https://gem.wiki/Capricorn_Ridge_Wind_Energy_Center	L907079	G927244	US65339F1012	1	660		7	2057	2097	2137	362	362	362	362	362	362	362	362	362	362	362	362
wind	United States	Americas	Northern America	Capricorn Ridge Wind Energy Center	RP2			298	operating	2017		onshore						NextEra Energy		31.9281	-100.964	exact					https://gem.wiki/Capricorn_Ridge_Wind_Energy_Center	L907079	G927245	US65339F1012	1	660	660	7	2057	2097	2137	298	298	298	298	298	298	298	298	298	298	298	298
wind	United States	Americas	Northern America	Carousel wind farm	1			150	operating	2015		onshore						NextEra Energy INC		39.3384	-102.15	exact		Kit Carson County		Colorado	https://gem.wiki/Carousel_wind_farm	L907189	G909689	US65339F1012	1	150	150	9	2055	2095	2135	150	150	150	150	150	150	150	150	150	150	150	150
wind	United States	Americas	Northern America	Casa Mesa wind farm	1			51	operating	2018		onshore						NextEra Energy INC		34.6308	-103.976	exact		Quay County		New Mexico	https://gem.wiki/Casa_Mesa_wind_farm	L906702	G909025	US65339F1012	1	51	51	6	2058	2098	2138	51	51	51	51	51	51	51	51	51	51	51	51
wind	Canada	Americas	Northern America	Cedar Point 2 wind farm			Cedar Point Lambton wind farm	100	operating	2015		onshore						NextEra Energy INC		43.1682	-81.9434	exact	Lambton Shores	Lambton County	Southwestern Ontario	Ontario	https://gem.wiki/Cedar_Point_2_wind_farm	L906977	G909391	US65339F1012	1	100	100	9	2055	2095	2135	100	100	100	100	100	100	100	100	100	100	100	100
wind	United States	Americas	Northern America	Cedar Springs wind farm	1			199	operating	2020		onshore						NextEra Energy INC		43.1283	-105.462	exact		Converse County		Wyoming	https://gem.wiki/Cedar_Springs_wind_farm	L907140	G909892	US65339F1012	1	332		4	2060	2100	2140	199	199	199	199	199	199	199	199	199	199	199	199
wind	United States	Americas	Northern America	Cedar Springs wind farm	3			133	operating	2020		onshore						NextEra Energy INC		43.0693	-105.57	exact		Converse County		Wyoming	https://gem.wiki/Cedar_Springs_wind_farm	L907140	G909620	US65339F1012	1	332	332	4	2060	2100	2140	133	133	133	133	133	133	133	133	133	133	133	133
wind	United States	Americas	Northern America	Cerro Gordo wind farm	RP1		Hawkeye Power, Clear Lake	42	operating	2020		onshore						NextEra Energy INC		43.0548	-93.4482	exact		Cerro Gordo County		Iowa	https://gem.wiki/Cerro_Gordo_wind_farm	L906624	G908934	US65339F1012	1	42	42	4	2060	2100	2140	42	42	42	42	42	42	42	42	42	42	42	42
wind	United States	Americas	Northern America	Cimarron I wind farm	1			166	operating	2012		onshore						NextEra Energy INC		37.8641	-100.235	exact		Gray County		Kansas	https://gem.wiki/Cimarron_I_wind_farm	L907277	G909804	US65339F1012	1	166	166	12	2052	2092	2132	166	166	166	166	166	166	166	166	166	166	166	166
wind	United States	Americas	Northern America	Clearwater wind farm	1			365	operating	2022		onshore						NextEra Energy INC; Portland General Electric (PGE)		46.8142	-106.349	exact	Rock Springs	Rosebud County		Montana	https://gem.wiki/Clearwater_wind_farm	L907682	G910340	US65339F1012	0.5	676		2	2062	2102	2142	0	0	182.5	182.5	182.5	182.5	182.5	182.5	182.5	182.5	182.5	182.5
wind	United States	Americas	Northern America	Clearwater wind farm	2			103	pre-construction	2023		onshore						NextEra Energy INC; Portland General Electric (PGE)		46.8188	-106.195	approximate					https://gem.wiki/Clearwater_wind_farm	L907682	G927253	US65339F1012	0.5	676		1	2063	2103	2143	0	0	0	0	0	0	0	0	0	0	0	0
wind	United States	Americas	Northern America	Clearwater wind farm	3			208	pre-construction	2023		onshore						NextEra Energy INC; Portland General Electric (PGE)		46.7896	-106.002	approximate					https://gem.wiki/Clearwater_wind_farm	L907682	G927254	US65339F1012	0.5	676	676	1	2063	2103	2143	0	0	0	0	0	0	0	0	0	0	0	0
wind	United States	Americas	Northern America	Cottonwood wind farm	1			90	operating	2017		onshore						NextEra Energy INC		40.2723	-98.3745	exact		Webster County		Nebraska	https://gem.wiki/Cottonwood_wind_farm	L906906	G909299	US65339F1012	1	90	90	7	2057	2097	2137	90	90	90	90	90	90	90	90	90	90	90	90
wind	United States	Americas	Northern America	Crowned Ridge Wind Project	1			200	operating	2019		onshore						NextEra Energy INC		45.0816	-97.0107	exact		Codington County		South Dakota	https://gem.wiki/Crowned_Ridge_Wind_Project	L907404	G909971	US65339F1012	1	200	200	5	2059	2099	2139	200	200	200	200	200	200	200	200	200	200	200	200
wind	United States	Americas	Northern America	Crystal Lake wind farm	RP1			162	operating	2020		onshore						NextEra Energy INC		43.2071	-93.8631	exact		Hancock County		Iowa	https://gem.wiki/Crystal_Lake_wind_farm	L906778	G909793	US65339F1012	1	162	162	4	2060	2100	2140	162	162	162	162	162	162	162	162	162	162	162	162
wind	United States	Americas	Northern America	Day County Wind Project	RP			106	operating	2020		onshore						NextEra Energy INC		45.2743	-97.917	exact					https://gem.wiki/Day_County_Wind_Project	L906952	G927263	US65339F1012	1	106	106	4	2060	2100	2140	106	106	106	106	106	106	106	106	106	106	106	106
wind	United States	Americas	Northern America	Dodge County wind farm	1			260	announced	2024		onshore						NextEra Energy INC		44.0056	-92.9504	exact		Dodge County		Minnesota	https://gem.wiki/Dodge_County_wind_farm	L907285	G909818	US65339F1012	1	260	260	0	2064	2104	2144	0	0	0	0	0	0	0	0	0	0	0	0
wind	Canada	Americas	Northern America	East Durham wind farm				22	operating	2015		onshore						NextEra Energy INC		44.1894	-80.6416	exact	West Grey	Grey County	Southwestern Ontario	Ontario	https://gem.wiki/East_Durham_wind_farm	L906461	G908741	US65339F1012	1	22	22	9	2055	2095	2135	22	22	22	22	22	22	22	22	22	22	22	22
wind	United States	Americas	Northern America	Edmondson Ranch Wind Project	1		Lacy Creek Wind Energy Center	301	operating	2022		onshore						NextEra Energy INC		31.7373	-101.263	exact	Sterling City	Glasscock County		Texas	https://gem.wiki/Edmondson_Ranch_Wind_Project	L907546	G910180	US65339F1012	1	301	301	2	2062	2102	2142	0	0	301	301	301	301	301	301	301	301	301	301
wind	United States	Americas	Northern America	Eight Point wind farm	1			102	operating	2023		onshore						NextEra Energy INC		42.1016	-77.7011	exact	Greenwood	Steuben County		New York	https://gem.wiki/Eight_Point_wind_farm	L907036	G909460	US65339F1012	1	102	102	1	2063	2103	2143	0	0	0	102	102	102	102	102	102	102	102	102
wind	United States	Americas	Northern America	Elk City wind farm	1			99	operating	2009		onshore						NextEra Energy INC		35.4755	-99.8888	exact		Roger Mills County		Oklahoma	https://gem.wiki/Elk_City_wind_farm	L906939	G909339	US65339F1012	1	200		15	2049	2089	2129	99	99	99	99	99	99	99	99	99	99	99	99
wind	United States	Americas	Northern America	Elk City wind farm	2			101	operating	2010		onshore						NextEra Energy INC		35.4985	-99.6587	exact		Roger Mills County		Oklahoma	https://gem.wiki/Elk_City_wind_farm	L906939	G909451	US65339F1012	1	200	200	14	2050	2090	2130	101	101	101	101	101	101	101	101	101	101	101	101
wind	United States	Americas	Northern America	Emmons Logan wind farm	1			216	operating	2019		onshore						NextEra Energy INC		46.4019	-99.9074	exact		Logan County		North Dakota	https://gem.wiki/Emmons_Logan_wind_farm	L907455	G910057	US65339F1012	1	216	216	5	2059	2099	2139	216	216	216	216	216	216	216	216	216	216	216	216
wind	United States	Americas	Northern America	Endeavor wind farm	RP			150	operating	2019		onshore						NextEra Energy INC		43.3891	-95.4025	exact		Osceola County		Iowa	https://gem.wiki/Endeavor_wind_farm	L906676	G927268	US65339F1012	1	150	150	5	2059	2099	2139	150	150	150	150	150	150	150	150	150	150	150	150
wind	United States	Americas	Northern America	Enron Earth Smart wind farm	1		Green Power I, Green Power Enron, Helzel & Schwarzhoff 88	16	operating	1999		onshore						NextEra Energy INC		33.9167	-116.56	exact	Palm Springs	Riverside County		California	https://gem.wiki/Enron_Earth_Smart_wind_farm	L906367	G908637	US65339F1012	1	16	16	25	2039	2079	2119	16	16	16	16	16	16	16	16	16	16	16	16
wind	United States	Americas	Northern America	Ensign wind farm	1			99	operating	2012		onshore						NextEra Energy INC		37.6145	-100.285	exact		Gray County		Kansas	https://gem.wiki/Ensign_wind_farm	L906940	G909340	US65339F1012	1	99	99	12	2052	2092	2132	99	99	99	99	99	99	99	99	99	99	99	99
wind	United States	Americas	Northern America	Gage Wind Project	1			124	shelved			onshore						NextEra Energy INC		40.4197	-96.663	approximate	Pickrell	Gage County		Nebraska	https://gem.wiki/Gage_Wind_Project	L907117	G909583	US65339F1012	1	124	124	-99	40	80	120	0	0	0	0	0	0	0	0	0	0	0	0
wind	Canada	Americas	Northern America	Ghost Pine wind farm				82	operating	2010		onshore						NextEra Energy INC		51.9344	-113.433	exact		Kneehill County		Alberta	https://gem.wiki/Ghost_Pine_wind_farm	L906892	G909282	US65339F1012	1	82	82	14	2050	2090	2130	82	82	82	82	82	82	82	82	82	82	82	82
wind	United States	Americas	Northern America	Golden Hills (California) wind farm	1			86	operating	2015		onshore						NextEra Energy INC		37.7187	-121.649	exact		Alameda County		California	https://gem.wiki/Golden_Hills_(California)_wind_farm	L921940	G927281	US65339F1012	1	132		9	2055	2095	2135	86	86	86	86	86	86	86	86	86	86	86	86
wind	United States	Americas	Northern America	Golden Hills (California) wind farm	2		Golden Hills II	46	operating	2017		onshore						NextEra Energy INC		37.7464	-121.616	exact		Alameda County		California	https://gem.wiki/Golden_Hills_(California)_wind_farm	L921940	G927282	US65339F1012	1	132	132	7	2057	2097	2137	46	46	46	46	46	46	46	46	46	46	46	46
wind	United States	Americas	Northern America	Golden West wind farm	1			249	operating	2015		onshore						NextEra Energy INC		38.9244	-104.224	exact		El Paso County		Colorado	https://gem.wiki/Golden_West_wind_farm	L907496	G910121	US65339F1012	1	249	249	9	2055	2095	2135	249	249	249	249	249	249	249	249	249	249	249	249
wind	Canada	Americas	Northern America	Goshen wind farm			Goshen Huron wind farm	102	operating	2015		onshore						NextEra Energy INC		43.4029	-81.611	exact	Bluewater	Huron County	Southwestern Ontario	Ontario	https://gem.wiki/Goshen_wind_farm	L907039	G909465	US65339F1012	1	102	102	9	2055	2095	2135	102	102	102	102	102	102	102	102	102	102	102	102
wind	United States	Americas	Northern America	Granite Reliable Power wind farm	1			99	operating	2012		onshore						NextEra Energy INC		44.7532	-71.2987	exact		Coos County		New Hampshire	https://gem.wiki/Granite_Reliable_Power_wind_farm	L906959	G909368	US65339F1012	1	99	99	12	2052	2092	2132	99	99	99	99	99	99	99	99	99	99	99	99
wind	United States	Americas	Northern America	Grant Park wind farm	1			200	shelved			onshore						NextEra Energy INC		41.2454	-87.6425	approximate	Grant Park	Kankakee County		Illinois	https://gem.wiki/Grant_Park_wind_farm	L907370	G909928	US65339F1012	1	200	200	-99	40	80	120	0	0	0	0	0	0	0	0	0	0	0	0
wind	United States	Americas	Northern America	Gray County wind farm	Montezuma			112	operating	2001		onshore						NextEra Energy INC		37.6133	-100.355	exact		Gray County		Kansas	https://gem.wiki/Gray_County_wind_farm	L907077	G909529	US65339F1012	1	112	112	23	2041	2081	2121	112	112	112	112	112	112	112	112	112	112	112	112
wind	United States	Americas	Northern America	Great Prairie wind farm	1		Firewheel Wind Project	358	operating	2022		onshore						NextEra Energy INC		36.2972	-101.529	exact		Hansford County		Texas	https://gem.wiki/Great_Prairie_wind_farm	L907445	G910270	US65339F1012	1	867		2	2062	2102	2142	0	0	358	358	358	358	358	358	358	358	358	358
wind	United States	Americas	Northern America	Great Prairie wind farm	2		Firewheel Wind Project	210	operating	2022		onshore						NextEra Energy INC		36.3701	-101.555	exact		Hansford County		Texas	https://gem.wiki/Great_Prairie_wind_farm	L907445	G910038	US65339F1012	1	867		2	2062	2102	2142	0	0	210	210	210	210	210	210	210	210	210	210
wind	United States	Americas	Northern America	Great Prairie wind farm	3		Firewheel Wind Project	299	operating	2022		onshore						NextEra Energy INC		36.4566	-101.472	exact		Hansford County		Texas	https://gem.wiki/Great_Prairie_wind_farm	L907445	G910191	US65339F1012	1	867	867	2	2062	2102	2142	0	0	299	299	299	299	299	299	299	299	299	299
wind	United States	Americas	Northern America	Hancock County wind farm	1			98	operating	2002		onshore						NextEra Energy INC		42.9422	-93.664	exact		Carbon County		Wyoming	https://gem.wiki/Hancock_County_wind_farm	L906931	G909331	US65339F1012	1	98	98	22	2042	2082	2122	98	98	98	98	98	98	98	98	98	98	98	98
wind	United States	Americas	Northern America	Heartland Divide wind farm	1			104	operating	2018		onshore						NextEra Energy INC		41.7588	-94.7951	exact		Audubon County		Iowa	https://gem.wiki/Heartland_Divide_wind_farm	L907052	G909482	US65339F1012	1	304		6	2058	2098	2138	104	104	104	104	104	104	104	104	104	104	104	104
wind	United States	Americas	Northern America	Heartland Divide wind farm	2			200	operating	2022		onshore						NextEra Energy INC		41.7588	-94.7951	exact		Audubon County		Iowa	https://gem.wiki/Heartland_Divide_wind_farm	L907052	G909932	US65339F1012	1	304	304	2	2062	2102	2142	0	0	200	200	200	200	200	200	200	200	200	200
wind	United States	Americas	Northern America	High Banks Wind	1			643	construction			onshore						NextEra Energy INC		39.816	-97.431	exact					https://gem.wiki/High_Banks_Wind	L921945	G927288	US65339F1012	1	643	643	-99	40	80	120	0	0	0	0	0	0	0	643	643	643	643	643
wind	United States	Americas	Northern America	High Lonesome Mesa wind farm	RP			99	operating	2019		onshore						NextEra Energy INC		34.489	-105.969	exact					https://gem.wiki/High_Lonesome_Mesa_wind_farm	L906986	G927289	US65339F1012	1	99	99	5	2059	2099	2139	99	99	99	99	99	99	99	99	99	99	99	99
wind	United States	Americas	Northern America	Horse Hollow Wind Energy Center	RP1			210	operating	2017		onshore						NextEra Energy		32.243	-100.026	exact					https://gem.wiki/Horse_Hollow_Wind_Energy_Center	L907446	G927291	US65339F1012	1	733		7	2057	2097	2137	210	210	210	210	210	210	210	210	210	210	210	210
wind	United States	Americas	Northern America	Horse Hollow Wind Energy Center	RP2			299	operating	2017		onshore						NextEra Energy		32.2526	-100.148	exact					https://gem.wiki/Horse_Hollow_Wind_Energy_Center	L907446	G927292	US65339F1012	1	733		7	2057	2097	2137	299	299	299	299	299	299	299	299	299	299	299	299
wind	United States	Americas	Northern America	Horse Hollow Wind Energy Center	RP3			224	operating	2017		onshore						NextEra Energy		32.2626	-100.294	exact					https://gem.wiki/Horse_Hollow_Wind_Energy_Center	L907446	G927293	US65339F1012	1	733	733	7	2057	2097	2137	224	224	224	224	224	224	224	224	224	224	224	224
wind	United States	Americas	Northern America	Indian Mesa wind farm	RP			82	operating	2018		onshore						NextEra Energy INC		30.9515	-102.164	exact					https://gem.wiki/Indian_Mesa_wind_farm	L906894	G927298	US65339F1012	1	82	82	6	2058	2098	2138	82	82	82	82	82	82	82	82	82	82	82	82
wind	United States	Americas	Northern America	Irish Creek wind farm	1			301	operating	2021		onshore						NextEra Energy INC		39.6987	-96.5513	exact	Frankfort	Marshall County		Kansas	https://gem.wiki/Irish_Creek_wind_farm	L907600	G910238	US65339F1012	1	301	301	3	2061	2101	2141	0	301	301	301	301	301	301	301	301	301	301	301
wind	United States	Americas	Northern America	Javelina wind farm	1			250	operating	2015		onshore						NextEra Energy INC		27.3115	-98.9772	exact		Webb County		Texas	https://gem.wiki/Javelina_wind_farm	L907374	G910122	US65339F1012	1	450		9	2055	2095	2135	250	250	250	250	250	250	250	250	250	250	250	250
wind	United States	Americas	Northern America	Javelina wind farm	2			200	operating	2016		onshore						NextEra Energy INC		27.5056	-98.9028	exact		Webb County		Texas	https://gem.wiki/Javelina_wind_farm	L907374	G909934	US65339F1012	1	450	450	8	2056	2096	2136	200	200	200	200	200	200	200	200	200	200	200	200
wind	United States	Americas	Northern America	Jordan Creek wind farm	1			402	operating	2020		onshore						NextEra Energy INC		40.4578	-87.383	exact		Warren County		Indiana	https://gem.wiki/Jordan_Creek_wind_farm	L907649	G910297	US65339F1012	1	402	402	4	2060	2100	2140	402	402	402	402	402	402	402	402	402	402	402	402
wind	United States	Americas	Northern America	King Mountain Wind Ranch wind farm	1			278	operating	2001		onshore						NextEra Energy INC		31.271	-102.189	exact		Upton County		Texas	https://gem.wiki/King_Mountain_Wind_Ranch_wind_farm	L907534	G910166	US65339F1012	1	278	278	23	2041	2081	2121	278	278	278	278	278	278	278	278	278	278	278	278
wind	United States	Americas	Northern America	Kingman Wind Energy Center	1		Kingman Wind	207	operating	2016		onshore						NextEra Energy INC		37.5772	-98.1768	exact		Kingman County		Kansas	https://gem.wiki/Kingman_Wind_Energy_Center	L907439	G910029	US65339F1012	1	207	207	8	2056	2096	2136	207	207	207	207	207	207	207	207	207	207	207	207
wind	United States	Americas	Northern America	KODE Novus wind farm	RP			160	announced			onshore						NextEra Energy INC		36.527	-101.369	exact		Texas County		Oklahoma	https://gem.wiki/KODE_Novus_wind_farm	L906610	G921369	US65339F1012	1	160	160	-99	40	80	120	0	0	0	0	0	0	0	0	0	0	0	0
wind	United States	Americas	Northern America	Langdon wind farm	RP			170	operating	2018		onshore						NextEra Energy INC		48.5829	-98.2555	exact					https://gem.wiki/Langdon_wind_farm	L906616	G927304	US65339F1012	1	170	170	6	2058	2098	2138	170	170	170	170	170	170	170	170	170	170	170	170
wind	United States	Americas	Northern America	Lee Dekalb wind farm	1		FPL Energy Illinois Wind LLC Hybrid	218	operating	2009		onshore						NextEra Energy INC		41.8224	-88.785	exact		DeKalb County		Illinois	https://gem.wiki/Lee_Dekalb_wind_farm	L907458	G910060	US65339F1012	1	218	218	15	2049	2089	2129	218	218	218	218	218	218	218	218	218	218	218	218
wind	United States	Americas	Northern America	Limon wind farm	1			200	operating	2012		onshore						NextEra Energy INC		39.3836	-103.53	exact		Elbert County		Colorado	https://gem.wiki/Limon_wind_farm	L907377	G909937	US65339F1012	1	601		12	2052	2092	2132	200	200	200	200	200	200	200	200	200	200	200	200
wind	United States	Americas	Northern America	Limon wind farm	2			200	operating	2012		onshore						NextEra Energy INC		39.3749	-103.52	exact		Lincoln County		Colorado	https://gem.wiki/Limon_wind_farm	L907377	G909938	US65339F1012	1	601		12	2052	2092	2132	200	200	200	200	200	200	200	200	200	200	200	200
wind	United States	Americas	Northern America	Limon wind farm	3			201	operating	2014		onshore						NextEra Energy INC		39.3586	-103.369	exact		Lincoln County		Colorado	https://gem.wiki/Limon_wind_farm	L907377	G909984	US65339F1012	1	601	601	10	2054	2094	2134	201	201	201	201	201	201	201	201	201	201	201	201
wind	United States	Americas	Northern America	Little Blue Wind Project	1			250	operating	2021		onshore						NextEra Energy INC		40.2863	-98.5777	exact	Blue Hill	Webster County		Nebraska	https://gem.wiki/Little_Blue_Wind_Project	L907505	G910132	US65339F1012	1	250	250	3	2061	2101	2141	0	250	250	250	250	250	250	250	250	250	250	250
wind	United States	Americas	Northern America	Lorenzo Winds wind farm	1		Crosby County 2, Fiber Winds Energy	80	operating	2018		onshore						NextEra Energy INC		33.7463	-101.436	exact		Crosby County		Texas	https://gem.wiki/Lorenzo_Winds_wind_farm	L906885	G909273	US65339F1012	1	80	80	6	2058	2098	2138	80	80	80	80	80	80	80	80	80	80	80	80
wind	United States	Americas	Northern America	Luverne (NextEra) Wind Energy Center	1			105	operating	2009		onshore						NextEra Energy INC		47.3505	-97.9509	exact		Steele County		North Dakota	https://gem.wiki/Luverne_(NextEra)_Wind_Energy_Center	L907060	G909495	US65339F1012	1	105	105	15	2049	2089	2129	105	105	105	105	105	105	105	105	105	105	105	105
wind	United States	Americas	Northern America	Majestic wind farm	2B		High Majestic	80	operating	2012		onshore						NextEra Energy INC		35.386	-101.579	exact		Carson County		Texas	https://gem.wiki/Majestic_wind_farm	L906849	G909228	US65339F1012	1	165		12	2052	2092	2132	80	80	80	80	80	80	80	80	80	80	80	80
wind	United States	Americas	Northern America	Majestic wind farm	RP1			85	operating	2020		onshore						NextEra Energy INC		35.3765	-101.536	exact					https://gem.wiki/Majestic_wind_farm	L906849	G927313	US65339F1012	1	165	165	4	2060	2100	2140	85	85	85	85	85	85	85	85	85	85	85	85
wind	United States	Americas	Northern America	Mammoth Plains wind farm	1			199	operating	2014		onshore						NextEra Energy INC		36.0271	-98.7542	exact		Dewey County		Oklahoma	https://gem.wiki/Mammoth_Plains_wind_farm	L907340	G909886	US65339F1012	1	199	199	10	2054	2094	2134	199	199	199	199	199	199	199	199	199	199	199	199
wind	United States	Americas	Northern America	Minco wind farm	2			101	retired	2011	2021	onshore						NextEra Energy INC		35.3237	-98.0737	exact		Grady County		Oklahoma	https://gem.wiki/Minco_wind_farm	L906969	G909445	US65339F1012	1	640		13	2051	2091	2131	101	0	0	0	0	0	0	0	0	0	0	0
wind	United States	Americas	Northern America	Minco wind farm	3			101	retired	2012	2021	onshore						NextEra Energy INC		35.4051	-98.1196	exact		Canadian County		Oklahoma	https://gem.wiki/Minco_wind_farm	L906969	G909446	US65339F1012	1	640		12	2052	2092	2132	101	0	0	0	0	0	0	0	0	0	0	0
wind	United States	Americas	Northern America	Minco wind farm	4			130	operating	2018		onshore						NextEra Energy INC		35.3953	-98.2606	exact		Canadian County		Oklahoma	https://gem.wiki/Minco_wind_farm	L906969	G909605	US65339F1012	1	640		6	2058	2098	2138	130	130	130	130	130	130	130	130	130	130	130	130
wind	United States	Americas	Northern America	Minco wind farm	RP1			99	operating	2020		onshore						NextEra Energy INC		35.2823	-98.0359	exact					https://gem.wiki/Minco_wind_farm	L906969	G927315	US65339F1012	1	640		4	2060	2100	2140	99	99	99	99	99	99	99	99	99	99	99	99
wind	United States	Americas	Northern America	Minco wind farm	RP2			98	operating	2021		onshore						NextEra Energy INC		35.3237	-98.0737	exact					https://gem.wiki/Minco_wind_farm	L906969	G927316	US65339F1012	1	640		3	2061	2101	2141	0	98	98	98	98	98	98	98	98	98	98	98
wind	United States	Americas	Northern America	Minco wind farm	RP3			111	operating	2021		onshore						NextEra Energy INC		35.4051	-98.1196	exact					https://gem.wiki/Minco_wind_farm	L906969	G927317	US65339F1012	1	640	640	3	2061	2101	2141	0	111	111	111	111	111	111	111	111	111	111	111
wind	Canada	Americas	Northern America	Mont Copper wind farm				54	operating	2004		onshore						NextEra Energy INC		48.9779	-65.5506	exact	Mont-Albert	La Haute-Gaspésie		Quebec	https://gem.wiki/Mont_Copper_wind_farm	L906717	G909046	US65339F1012	1	54		20	2044	2084	2124	54	54	54	54	54	54	54	54	54	54	54	54
wind	Canada	Americas	Northern America	Mont Miller wind farm				54	operating	2005		onshore						NextEra Energy INC		48.9981	-65.4863	exact		La Côte-de-Gaspé		Quebec	https://gem.wiki/Mont_Miller_wind_farm	L906718	G909047	US65339F1012	1	54	54	19	2045	2085	2125	54	54	54	54	54	54	54	54	54	54	54	54
wind	United States	Americas	Northern America	Montezuma wind farm	1		FPL Energy Montezuma Winds LLC	37	operating	2010		onshore						NextEra Energy INC		38.1626	-121.793	exact		Solano County		California	https://gem.wiki/Montezuma_wind_farm	L906590	G908889	US65339F1012	1	115		14	2050	2090	2130	37	37	37	37	37	37	37	37	37	37	37	37
wind	United States	Americas	Northern America	Montezuma wind farm	2			78	operating	2012		onshore						NextEra Energy INC		38.1169	-121.81	exact		Solano County		California	https://gem.wiki/Montezuma_wind_farm	L906590	G909216	US65339F1012	1	115	115	12	2052	2092	2132	78	78	78	78	78	78	78	78	78	78	78	78
wind	United States	Americas	Northern America	New Mexico Wind Energy Center	1			204	operating	2003		onshore						NextEra Energy INC		34.5374	-104.081	exact		De Baca County		New Mexico	https://gem.wiki/New_Mexico_Wind_Energy_Center	L907431	G910019	US65339F1012	1	204	204	21	2043	2083	2123	204	204	204	204	204	204	204	204	204	204	204	204
wind	United States	Americas	Northern America	Ninnescah wind farm	1			208	operating	2016		onshore						NextEra Energy INC		37.6229	-98.5542	exact		Pratt County		Kansas	https://gem.wiki/Ninnescah_wind_farm	L907442	G910032	US65339F1012	1	208	208	8	2056	2096	2136	208	208	208	208	208	208	208	208	208	208	208	208
wind	United States	Americas	Northern America	Niyol wind farm	1			206	operating	2021		onshore						NextEra Energy INC		40.633	-102.927	exact	Fleming	Logan County		Colorado	https://gem.wiki/Niyol_wind_farm	L907383	G909947	US65339F1012	1	206	206	3	2061	2101	2141	0	206	206	206	206	206	206	206	206	206	206	206
wind	United States	Americas	Northern America	North Dakota wind farm	1A		FPL Energy North Dakota Wind I/II	40	operating	2003		onshore						NextEra Energy INC		46.3541	-98.8996	exact		LaMoure County		North Dakota	https://gem.wiki/North_Dakota_wind_farm	L906445	G908921	US65339F1012	1	61		21	2043	2083	2123	40	40	40	40	40	40	40	40	40	40	40	40
wind	United States	Americas	Northern America	North Dakota wind farm	1B		FPL Energy North Dakota Wind I/II	21	operating	2003		onshore						NextEra Energy INC		46.318	-98.8732	exact		LaMoure County		North Dakota	https://gem.wiki/North_Dakota_wind_farm	L906445	G908725	US65339F1012	1	61	61	21	2043	2083	2123	21	21	21	21	21	21	21	21	21	21	21	21
wind	United States	Americas	Northern America	North Sky River wind farm	1			162	operating	2012		onshore						NextEra Energy INC		35.3064	-118.226	exact		Kern County		California	https://gem.wiki/North_Sky_River_wind_farm	L907269	G909795	US65339F1012	1	162	162	12	2052	2092	2132	162	162	162	162	162	162	162	162	162	162	162	162
wind	United States	Americas	Northern America	Northern Divide Wind Energy Center	1		Burke Wind farm	199	operating	2021		onshore						NextEra Energy INC		48.8026	-102.867	exact		Burke County		North Dakota	https://gem.wiki/Northern_Divide_Wind_Energy_Center	L907345	G909893	US65339F1012	1	199	199	3	2061	2101	2141	0	199	199	199	199	199	199	199	199	199	199	199
wind	United States	Americas	Northern America	Oklahoma Wind Energy Center	RP		Mooreland	102	operating	2020		onshore						NextEra Energy INC		36.5801	-99.283	exact					https://gem.wiki/Oklahoma_Wind_Energy_Center	L906706	G927328	US65339F1012	1	102	102	4	2060	2100	2140	102	102	102	102	102	102	102	102	102	102	102	102
wind	United States	Americas	Northern America	Oliver County Wind Energy Center	3			99	operating	2017		onshore						NextEra Energy INC		46.9674	-101.153	exact		Morton County		North Dakota	https://gem.wiki/Oliver_County_Wind_Energy_Center	L906660	G909384	US65339F1012	1	301		7	2057	2097	2137	99	99	99	99	99	99	99	99	99	99	99	99
wind	United States	Americas	Northern America	Oliver County Wind Energy Center	4			202	announced	2024		onshore						NextEra Energy INC		47.1071	-101.334	approximate					https://gem.wiki/Oliver_County_Wind_Energy_Center	L906660	G927329	US65339F1012	1	301	301	0	2064	2104	2144	0	0	0	0	0	0	0	0	0	0	0	0
wind	United States	Americas	Northern America	Osborn wind farm	1			201	operating	2016		onshore						NextEra Energy INC		39.8932	-94.4797	exact		DeKalb County		Missouri	https://gem.wiki/Osborn_wind_farm	L907412	G909987	US65339F1012	1	201	201	8	2056	2096	2136	201	201	201	201	201	201	201	201	201	201	201	201
wind	United States	Americas	Northern America	Palm Springs wind farm	RP1		San Gorgonio Windplant WPP1993	50	operating	2011		onshore						NextEra Energy INC		33.9109	-116.574	exact	Palm Springs	Riverside County		California	https://gem.wiki/Palm_Springs_wind_farm	L906583	G908988	US65339F1012	1	50	50	13	2051	2091	2131	50	50	50	50	50	50	50	50	50	50	50	50
wind	United States	Americas	Northern America	Palo Duro wind farm	1			250	operating	2014		onshore						NextEra Energy INC		36.4567	-101.001	exact		Ochiltree County		Texas	https://gem.wiki/Palo_Duro_wind_farm	L907499	G910125	US65339F1012	1	250	250	10	2054	2094	2134	250	250	250	250	250	250	250	250	250	250	250	250
wind	United States	Americas	Northern America	Peetz Table (NextEra) wind farm	1			201	operating	2007		onshore						NextEra Energy INC		40.941	-103.259	exact		Logan County		Colorado	https://gem.wiki/Peetz_Table_(NextEra)_wind_farm	L921959	G927335	US65339F1012	1	401		17	2047	2087	2127	201	201	201	201	201	201	201	201	201	201	201	201
wind	United States	Americas	Northern America	Peetz Table (NextEra) wind farm	2			200	operating	2007		onshore						NextEra Energy INC		40.9988	-103.375	exact		Logan County		Colorado	https://gem.wiki/Peetz_Table_(NextEra)_wind_farm	L921959	G927336	US65339F1012	1	401	401	17	2047	2087	2127	200	200	200	200	200	200	200	200	200	200	200	200
wind	United States	Americas	Northern America	Pegasus wind farm	1			49	operating	2019		onshore						NextEra Energy INC		43.489	-83.5706	exact		Tuscola County		Michigan	https://gem.wiki/Pegasus_wind_farm	L906665	G908981	US65339F1012	1	151		5	2059	2099	2139	49	49	49	49	49	49	49	49	49	49	49	49
wind	United States	Americas	Northern America	Pegasus wind farm	2			102	operating	2020		onshore						NextEra Energy INC		43.4839	-83.6161	exact		Tuscola County		Michigan	https://gem.wiki/Pegasus_wind_farm	L906665	G909476	US65339F1012	1	151	151	4	2060	2100	2140	102	102	102	102	102	102	102	102	102	102	102	102
wind	United States	Americas	Northern America	Perrin Ranch wind farm	1			99	operating	2012		onshore						NextEra Energy INC		35.4535	-112.22	exact		Coconino County		Arizona	https://gem.wiki/Perrin_Ranch_wind_farm	L906970	G909383	US65339F1012	1	99	99	12	2052	2092	2132	99	99	99	99	99	99	99	99	99	99	99	99
wind	United States	Americas	Northern America	Pheasant Run wind farm	1			75	operating	2013		onshore						NextEra Energy INC		43.7628	-83.2834	exact		Huron County		Michigan	https://gem.wiki/Pheasant_Run_wind_farm	L906821	G909182	US65339F1012	1	75	75	11	2053	2093	2133	75	75	75	75	75	75	75	75	75	75	75	75
wind	United States	Americas	Northern America	Pioneer Creek wind farm	1			250	pre-construction	2025		onshore						NextEra Energy INC		37.7594	-99.8603	approximate	Wright	Ford County		Kansas	https://gem.wiki/Pioneer_Creek_wind_farm	L907222	G909735	US65339F1012	1	250	250	-1	2065	2105	2145	0	0	0	0	0	0	0	0	0	0	0	0
wind	United States	Americas	Northern America	Pioneer Hutt Wind	1			145	pre-construction	2024		onshore						NextEra Energy INC		31.7983	-101.904	approximate					https://gem.wiki/Pioneer_Hutt_Wind	L921960	G927337	US65339F1012	1	145	145	0	2064	2104	2144	0	0	0	0	0	0	0	0	0	0	0	0
wind	United States	Americas	Northern America	Ponderosa Wind Energy Center	1			204	operating	2020		onshore						NextEra Energy INC		36.6246	-100.708	exact		Beaver County		Oklahoma	https://gem.wiki/Ponderosa_Wind_Energy_Center	L907429	G910017	US65339F1012	1	304		4	2060	2100	2140	204	204	204	204	204	204	204	204	204	204	204	204
wind	United States	Americas	Northern America	Ponderosa Wind Energy Center	2			100	announced	2024		onshore						NextEra Energy INC		36.5895	-100.804	approximate					https://gem.wiki/Ponderosa_Wind_Energy_Center	L907429	G927340	US65339F1012	1	304	304	0	2064	2104	2144	0	0	0	0	0	0	0	0	0	0	0	0
wind	United States	Americas	Northern America	Pratt Wind Energy Center	1			244	operating	2018		onshore						NextEra Energy INC		37.5662	-98.9373	exact		Pratt County		Kansas	https://gem.wiki/Pratt_Wind_Energy_Center	L907488	G910112	US65339F1012	1	244	244	6	2058	2098	2138	244	244	244	244	244	244	244	244	244	244	244	244
wind	Canada	Americas	Northern America	Pubnico Point wind farm				31	operating	2005		onshore						NextEra Energy INC		43.6065	-65.7956	exact		Yarmouth County		Nova Scotia	https://gem.wiki/Pubnico_Point_wind_farm	L906566	G908860	US65339F1012	1	31	31	19	2045	2085	2125	31	31	31	31	31	31	31	31	31	31	31	31
wind	United States	Americas	Northern America	Red Canyon Wind Energy	RP			84	operating	2017		onshore						NextEra Energy INC		32.9836	-101.246	exact					https://gem.wiki/Red_Canyon_Wind_Energy	L906897	G927345	US65339F1012	1	84	84	7	2057	2097	2137	84	84	84	84	84	84	84	84	84	84	84	84
wind	United States	Americas	Northern America	Red Mesa wind farm	1			102	operating	2010		onshore						NextEra Energy INC		35.2627	-107.381	exact		Cibola County		New Mexico	https://gem.wiki/Red_Mesa_wind_farm	L907047	G909474	US65339F1012	1	102	102	14	2050	2090	2130	102	102	102	102	102	102	102	102	102	102	102	102
wind	United States	Americas	Northern America	Roundhouse Wind Energy Project	1			227	operating	2020		onshore						NextEra Energy INC		41.0752	-105.117	exact		Laramie County		Wyoming	https://gem.wiki/Roundhouse_Wind_Energy_Project	L906997	G910078	US65339F1012	1	327		4	2060	2100	2140	227	227	227	227	227	227	227	227	227	227	227	227
wind	United States	Americas	Northern America	Roundhouse Wind Energy Project	2			100	construction			onshore						NextEra Energy INC		41.0752	-105.117	approximate		Laramie County		Wyoming	https://gem.wiki/Roundhouse_Wind_Energy_Project	L906997	G909415	US65339F1012	1	327	327	-99	40	80	120	0	0	0	0	0	0	0	100	100	100	100	100
wind	United States	Americas	Northern America	Rush Springs Wind Energy Center	1			249	operating	2016		onshore						NextEra Energy INC		34.7305	-97.8668	exact		Grady County		Oklahoma	https://gem.wiki/Rush_Springs_Wind_Energy_Center	L907494	G910119	US65339F1012	1	249	249	8	2056	2096	2136	249	249	249	249	249	249	249	249	249	249	249	249
wind	United States	Americas	Northern America	Seiling wind farm	1			199	operating	2014		onshore						NextEra Energy INC		36.1419	-99.0347	exact		Dewey County		Oklahoma	https://gem.wiki/Seiling_wind_farm	L907005	G909887	US65339F1012	1	299		10	2054	2094	2134	199	199	199	199	199	199	199	199	199	199	199	199
wind	United States	Americas	Northern America	Seiling wind farm	2			100	operating	2014		onshore						NextEra Energy INC		36.1817	-98.9589	exact		Woodward County		Oklahoma	https://gem.wiki/Seiling_wind_farm	L907005	G909423	US65339F1012	1	299	299	10	2054	2094	2134	100	100	100	100	100	100	100	100	100	100	100	100
wind	United States	Americas	Northern America	Sholes Wind Energy Center	1			160	operating	2019		onshore						NextEra Energy INC		42.2995	-97.3638	exact		Wayne County		Nebraska	https://gem.wiki/Sholes_Wind_Energy_Center	L907260	G909781	US65339F1012	1	160	160	5	2059	2099	2139	160	160	160	160	160	160	160	160	160	160	160	160
wind	United States	Americas	Northern America	Skeleton Creek Energy Center Hybrid Wind	1			251	operating	2020		onshore						NextEra Energy INC		36.5337	-98.227	exact		Alfalfa County		Oklahoma	https://gem.wiki/Skeleton_Creek_Energy_Center_Hybrid_Wind	L907515	G910143	US65339F1012	1	251	251	4	2060	2100	2140	251	251	251	251	251	251	251	251	251	251	251	251
wind	United States	Americas	Northern America	Sky River Wind Energy Center	RP1			60	operating	2021		onshore						NextEra Energy INC		35.2689	-118.242	exact		Kern County		California	https://gem.wiki/Sky_River_Wind_Energy_Center	L906751	G909092	US65339F1012	1	60	60	3	2061	2101	2141	0	60	60	60	60	60	60	60	60	60	60	60
wind	United States	Americas	Northern America	Soldier Creek Wind Energy Center	1			301	operating	2020		onshore						NextEra Energy INC		39.5938	-96.0831	exact		Nemaha County		Kansas	https://gem.wiki/Soldier_Creek_Wind_Energy_Center	L907601	G910239	US65339F1012	1	301	301	4	2060	2100	2140	301	301	301	301	301	301	301	301	301	301	301	301
wind	United States	Americas	Northern America	South Dakota Wind Energy Center	1		Highmore Wind Energy Project	40	operating	2003		onshore						NextEra Energy INC		44.3686	-99.4431	exact		Hyde County		South Dakota	https://gem.wiki/South_Dakota_Wind_Energy_Center	L906618	G908923	US65339F1012	1	40	40	21	2043	2083	2123	40	40	40	40	40	40	40	40	40	40	40	40
wind	United States	Americas	Northern America	Stateline Wind Project	OR-1A		FPL Energy Vansycle LLC (OR)	83	operating	2001		onshore						NextEra Energy INC		45.9996	-118.812	exact		Umatilla County		Oregon	https://gem.wiki/Stateline_Wind_Project	L906601	G909287	US65339F1012	1	442		23	2041	2081	2121	83	83	83	83	83	83	83	83	83	83	83	83
wind	United States	Americas	Northern America	Stateline Wind Project	WA		FPL Energy Vansycle LLC (WA)	177	operating	2001		onshore						NextEra Energy INC		46.0401	-118.88	exact		Walla Walla County		Washington	https://gem.wiki/Stateline_Wind_Project	L906601	G909828	US65339F1012	1	442		23	2041	2081	2121	177	177	177	177	177	177	177	177	177	177	177	177
wind	United States	Americas	Northern America	Stateline Wind Project	OR-1B		FPL Energy Vansycle LLC (OR)	40	operating	2002		onshore						NextEra Energy INC		45.9763	-118.783	exact		Umatilla County		Oregon	https://gem.wiki/Stateline_Wind_Project	L906601	G908902	US65339F1012	1	442		22	2042	2082	2122	40	40	40	40	40	40	40	40	40	40	40	40
wind	United States	Americas	Northern America	Stateline Wind Project	OR RP1			142	pre-construction			onshore						NextEra Energy INC		45.9763	-118.783	approximate		Umatilla County		Oregon	https://gem.wiki/Stateline_Wind_Project	L906601	G909648	US65339F1012	1	442	442	-99	40	80	120	0	0	0	0	0	0	0	0	0	0	0	0
wind	United States	Americas	Northern America	Steele Flats Wind Energy Center	1			75	operating	2013		onshore						NextEra Energy INC		40.0569	-96.9705	exact		Jefferson County		Nebraska	https://gem.wiki/Steele_Flats_Wind_Energy_Center	L906823	G909184	US65339F1012	1	75	75	11	2053	2093	2133	75	75	75	75	75	75	75	75	75	75	75	75
wind	United States	Americas	Northern America	Story County wind farm	2		Garden Wind	150	operating	2009		onshore						NextEra Energy INC		42.2069	-93.299	exact		Hardin County		Iowa	https://gem.wiki/Story_County_wind_farm	L907228	G909745	US65339F1012	1	300		15	2049	2089	2129	150	150	150	150	150	150	150	150	150	150	150	150
wind	United States	Americas	Northern America	Story County wind farm	RP1			150	operating	2019		onshore						NextEra Energy INC		42.0534	-93.2627	exact					https://gem.wiki/Story_County_wind_farm	L907228	G927365	US65339F1012	1	300		5	2059	2099	2139	150	150	150	150	150	150	150	150	150	150	150	150
wind	United States	Americas	Northern America	Three Waters Wind Project	1			300	announced	2024		onshore						NextEra Energy INC		43.5966	-95.3479	approximate	Round Lake	Nobles County		Minnesota	https://gem.wiki/Three_Waters_Wind_Project	L907596	G910233	US65339F1012	1	300	300	0	2064	2104	2144	0	0	0	0	0	0	0	0	0	0	0	0
wind	United States	Americas	Northern America	Timberwolf wind farm	1			200	pre-construction	2023		onshore						NextEra Energy INC		43.5902	-92.3829	approximate	Ostrander	Fillmore County		Minnesota	https://gem.wiki/Timberwolf_wind_farm	L907400	G909966	US65339F1012	1	200	200	1	2063	2103	2143	0	0	0	0	0	0	0	0	0	0	0	0
wind	United States	Americas	Northern America	Torrecillas Wind Energy	1		Javelina III	300	operating	2018		onshore						NextEra Energy INC		27.5799	-98.8247	exact		Webb County		Texas	https://gem.wiki/Torrecillas_Wind_Energy	L907598	G910235	US65339F1012	1	300	300	6	2058	2098	2138	300	300	300	300	300	300	300	300	300	300	300	300
wind	United States	Americas	Northern America	Tuscola Bay Wind	1			120	operating	2012		onshore						NextEra Energy INC		43.5588	-83.6379	exact		Tuscola County		Michigan	https://gem.wiki/Tuscola_Bay_Wind	L907006	G909571	US65339F1012	1	220		12	2052	2092	2132	120	120	120	120	120	120	120	120	120	120	120	120
wind	United States	Americas	Northern America	Tuscola Bay Wind	2			100	operating	2013		onshore						NextEra Energy INC		43.4906	-83.5744	exact		Tuscola County		Michigan	https://gem.wiki/Tuscola_Bay_Wind	L907006	G909424	US65339F1012	1	220	220	11	2053	2093	2133	100	100	100	100	100	100	100	100	100	100	100	100
wind	United States	Americas	Northern America	Vansycle wind farm	1		Vansycle Ridge	25	operating	1998		onshore						NextEra Energy INC		45.9408	-118.666	exact		Umatilla County		Oregon	https://gem.wiki/Vansycle_wind_farm	L906505	G908790	US65339F1012	1	238		26	2038	2078	2118	25	25	25	25	25	25	25	25	25	25	25	25
wind	United States	Americas	Northern America	Vansycle wind farm	2		Vansycle Ridge	99	operating	2009		onshore						NextEra Energy INC		45.8916	-118.531	exact		Umatilla County		Oregon	https://gem.wiki/Vansycle_wind_farm	L906505	G909346	US65339F1012	1	238		15	2049	2089	2129	99	99	99	99	99	99	99	99	99	99	99	99
wind	United States	Americas	Northern America	Vansycle wind farm	RP2		Vansycle Ridge	114	announced			onshore						NextEra Energy INC		45.8916	-118.531	exact		Umatilla County		Oregon	https://gem.wiki/Vansycle_wind_farm	L906505	G909537	US65339F1012	1	238	238	-99	40	80	120	0	0	0	0	0	0	0	0	0	0	0	0
wind	United States	Americas	Northern America	Vasco wind farm	1			78	operating	2011		onshore						NextEra Energy INC		37.7985	-121.701	exact		Contra Costa County		California	https://gem.wiki/Vasco_wind_farm	L906847	G909217	US65339F1012	1	78	78	13	2051	2091	2131	78	78	78	78	78	78	78	78	78	78	78	78
wind	United States	Americas	Northern America	Weatherford Wind Energy Center	RP			157	operating	2020		onshore						NextEra Energy INC		35.4947	-98.7432	exact					https://gem.wiki/Weatherford_Wind_Energy_Center	L906619	G927378	US65339F1012	1	157	157	4	2060	2100	2140	157	157	157	157	157	157	157	157	157	157	157	157
wind	United States	Americas	Northern America	Wessington Springs wind farm	1			51	operating	2009		onshore						NextEra Energy INC		44.0021	-98.5996	exact		Jerauld County		South Dakota	https://gem.wiki/Wessington_Springs_wind_farm	L906707	G909033	US65339F1012	1	51	51	15	2049	2089	2129	51	51	51	51	51	51	51	51	51	51	51	51
wind	United States	Americas	Northern America	Wheatridge East Wind	1			200	announced	2024		onshore						NextEra Energy INC		45.5426	-119.382	approximate					https://gem.wiki/Wheatridge_East_Wind	L921977	G927381	US65339F1012	1	200	200	0	2064	2104	2144	0	0	0	0	0	0	0	0	0	0	0	0
wind	United States	Americas	Northern America	Wheatridge Renewable Wind Energy Center	1			300	operating	2020		onshore						Portland General Electric (PGE); NextEra Energy		45.4905	-119.531	exact		Morrow County		Oregon	https://gem.wiki/Wheatridge_Renewable_Wind_Energy_Center	L907562	G910198	US65339F1012	0.5	300	300	4	2060	2100	2140	150	150	150	150	150	150	150	150	150	150	150	150
wind	United States	Americas	Northern America	White Hills wind farm	1		Mohave County Wind Farm	350	operating	2020		onshore						NextEra Energy INC		35.8005	-114.441	exact		Mohave County		Arizona	https://gem.wiki/White_Hills_wind_farm	L907619	G910262	US65339F1012	1	350	350	4	2060	2100	2140	350	350	350	350	350	350	350	350	350	350	350	350
wind	United States	Americas	Northern America	White Mesa wind farm	1			500	operating	2021		onshore						NextEra Energy INC		30.8811	-101.212	exact	Ozona	Crockett County		Texas	https://gem.wiki/White_Mesa_wind_farm	L907665	G910321	US65339F1012	1	500	500	3	2061	2101	2141	0	500	500	500	500	500	500	500	500	500	500	500
wind	United States	Americas	Northern America	White Oak wind farm	1			150	operating	2011		onshore						NextEra Energy INC		40.5866	-89.0727	exact		McLean County		Illinois	https://gem.wiki/White_Oak_wind_farm	L907232	G909749	US65339F1012	1	150	150	13	2051	2091	2131	150	150	150	150	150	150	150	150	150	150	150	150
wind	United States	Americas	Northern America	Wildcat Ranch Wind Project	1		Bonita Wildcat Ranch	151	operating	2018		onshore						NextEra Energy INC		33.499	-102.86	exact		Cochran County		Texas	https://gem.wiki/Wildcat_Ranch_Wind_Project	L907236	G909753	US65339F1012	1	151	151	6	2058	2098	2138	151	151	151	151	151	151	151	151	151	151	151	151
wind	United States	Americas	Northern America	Wilton wind farm	RP2			50	operating	2019		onshore						NextEra Energy INC		47.1094	-100.777	exact					https://gem.wiki/Wilton_wind_farm	L906384	G927385	US65339F1012	1	103		5	2059	2099	2139	50	50	50	50	50	50	50	50	50	50	50	50
wind	United States	Americas	Northern America	Wilton wind farm	RP1			53	operating	2020		onshore						NextEra Energy INC		47.1269	-100.711	exact					https://gem.wiki/Wilton_wind_farm	L906384	G927384	US65339F1012	1	103	103	4	2060	2100	2140	53	53	53	53	53	53	53	53	53	53	53	53
wind	United States	Americas	Northern America	Windstar wind farm (United States)	1			120	operating	2012		onshore						NextEra Energy INC		35.0275	-118.271	exact		Kern County		California	https://gem.wiki/Windstar_wind_farm_(United_States)	L907112	G909574	US65339F1012	1	120		12	2052	2092	2132	120	120	120	120	120	120	120	120	120	120	120	120
wind	United States	Americas	Northern America	Wolf Ridge wind farm	RP			120	operating	2020		onshore						NextEra Energy INC		33.7318	-97.4492	exact					https://gem.wiki/Wolf_Ridge_wind_farm	L907081	G927387	US65339F1012	1	120	120	4	2060	2100	2140	120	120	120	120	120	120	120	120	120	120	120	120
wind	United States	Americas	Northern America	Woodward Mountain wind farm	1		Woodward Mountain I	82	operating	2001		onshore						NextEra Energy INC		30.9478	-102.477	exact		Pecos County		Texas	https://gem.wiki/Woodward_Mountain_wind_farm	L906838	G909285	US65339F1012	1	158		23	2041	2081	2121	82	82	82	82	82	82	82	82	82	82	82	82
wind	United States	Americas	Northern America	Woodward Mountain wind farm	2		Woodward Mountain II	76	operating	2001		onshore						NextEra Energy INC		30.9432	-102.425	exact		Pecos County		Texas	https://gem.wiki/Woodward_Mountain_wind_farm	L906838	G909202	US65339F1012	1	158	158	23	2041	2081	2121	76	76	76	76	76	76	76	76	76	76	76	76
																																		1153.47	1153.47	0	0	48849.3	53295	57168.5	58413.5	59686	59686	59686	60429	60429	60429	60429	60429
																																					Coal	1403.47	722.75	722.75	722.75	722.75	722.75	722.75	722.75	722.75	722.75	722.75	722.75
																																					Oil&Gas	24240.3	26347.7	27510.7	27510.7	27510.7	27510.7	27510.7	27510.7	27510.7	27510.7	27510.7	27510.7
																																					Fossil fuel	25643.8	27070.4	28233.4	28233.4	28233.4	28233.4	28233.4	28233.4	28233.4	28233.4	28233.4	28233.4
																																					Renewables	23205.5	26224.5	28935	30180	31452.5	31452.5	31452.5	32195.5	32195.5	32195.5	32195.5	32195.5
																																					Oil	21801.3	22773.3	23936.3	23936.3	23936.3	23936.3	23936.3	23936.3	23936.3	23936.3	23936.3	23936.3
																																					Gas	23694	25801.4	26964.4	26964.4	26964.4	26964.4	26964.4	26964.4	26964.4	26964.4	26964.4	26964.4
																																					Nuclear	0	0	0	0	0	0	0	0	0	0	0	0
																																					Wind	17397	19020	20851.5	20953.5	21114.5	21114.5	21114.5	21857.5	21857.5	21857.5	21857.5	21857.5
																																					solar	5808.51	7204.51	8083.51	9226.51	10338	10338	10338	10338	10338	10338	10338	10338
																																					Total capacity without discounts	51122.9	55358.3	59414.3	60659.3
																																					Total capacity without discounts	27446	28662.4	29825.4	29825.4
[truncated: 19 more columns]

## Sheet: NextEraEnergy_TP
Type	Country/area	Region	Subregion	Plant / Project name	Unit / Phase name	Plant / Project name (local)	Plant / Project name (other)	Capacity (MW)	Status	Start year	Retired year	Technology	Fuel	Country/area 1 (hydropower only)	Country/area 2 (hydropower only)	Country/area 1 Capacity (MW) (hydropower only)	Country/area 2 Capacity (MW) (hydropower only)	Owner	Parent	Latitude	Longitude	Location accuracy	City	Local area (taluk, county)	Major area (prefecture, district)	Subnational unit (state, province)	GEM.Wiki URL	GEM location ID	GEM unit/phase ID	CompISIN	Ownership	Plant capacity	Plant capacity	Age	Reinvestment year	Reinvestment year	Reinvestment year	2020	2021	2022	2023	2024	2025	2026	2027	2028	2029	2030	2031
coal	United States	Americas	Northern America	Daniel Generating Plant	Unit 1		Victor J. Daniel Generating Plant	500	operating	1977	2024	subcritical	bituminous					Florida Power & Light [50%]; Mississippi Power [50%]	NextEra Energy Inc [50.0%]; Southern Co [50.0%]	30.5327	-88.5571	exact	Escatawpa	Jackson		Mississippi	https://www.gem.wiki/Daniel_Generating_Plant	L100000104008	G100000101965	US65339F1012	0.5	1000		47	2017	2057	2097	250	250	250	250	0	0	0	0	0	0	0	0
coal	United States	Americas	Northern America	Daniel Generating Plant	Unit 2		Victor J. Daniel Generating Plant	500	operating	1981	2027	subcritical	bituminous					Florida Power & Light [50%]; Mississippi Power [50%]	NextEra Energy Inc [50.0%]; Southern Co [50.0%]	30.5327	-88.5571	exact	Escatawpa	Jackson		Mississippi	https://www.gem.wiki/Daniel_Generating_Plant	L100000104008	G100000101966	US65339F1012	0.5	1000	1000	43	2021	2061	2101	250	250	250	250	250	250	250	0	0	0	0	0
coal	United States	Americas	Northern America	Scherer Steam Generating Station	Unit 3			891	operating	1987	2028	subcritical	subbituminous					Florida Power & Light [25%]; Georgia Power [75%]	Southern Co [75.0%]; NextEra Energy Inc [25.0%]	33.0603	-83.8069	exact	Juliette	Monroe		Georgia	https://www.gem.wiki/Scherer_Steam_Generating_Station	L100000103847	G100000108871	US65339F1012	0.25	1782		37	2027	2067	2107	222.75	222.75	222.75	222.75	222.75	222.75	222.75	222.75	0	0	0	0
coal	United States	Americas	Northern America	Scherer Steam Generating Station	Unit 4			891	retired	1989	2021	subcritical	subbituminous					JEA [23%]; Florida Power & Light [76%]	NextEra Energy Inc [76.4%]; JEA [23.6%]	33.0603	-83.8069	exact	Juliette	Monroe		Georgia	https://www.gem.wiki/Scherer_Steam_Generating_Station	L100000103847	G100000108872	US65339F1012	0.764	1782	1782	35	2029	2069	2109	680.724	0	0	0	0	0	0	0	0	0	0	0
oil/gas	United States	Americas	Northern America	Bayswater peaking facility	1			61	operating	2002		GT	NG					Bayswater Peaking Facility LLC [100.0%]	NextEra Energy Inc [100.0%]	40.6107	-73.7622	exact	Far Rockaway	Queens		New York	https://www.gem.wiki/Bayswater_peaking_facility	L100000401744	G100000402522	US65339F1012	1	61	61	22	2042	2082	2122	61	61	61	61	61	61	61	61	61	61	61	61
oil/gas	United States	Americas	Northern America	Cape Canaveral power station	PCC			1295	operating	2013		CC	NG/FO					Florida Power & Light Co [100.0%]	NextEra Energy Inc [100.0%]	28.4698	-80.7644	exact	Cocoa	Brevard		Florida	https://www.gem.wiki/Cape_Canaveral_power_station	L100000401947	G100000402107	US65339F1012	1	1295	1295	11	2053	2093	2133	1295	1295	1295	1295	1295	1295	1295	1295	1295	1295	1295	1295
oil/gas	United States	Americas	Northern America	Fort Myers power station	9			62	operating	1974		GT	FO					Florida Power & Light Co [100.0%]	NextEra Energy Inc [100.0%]	26.6967	-81.7831	exact	Ft. Myers	Lee		Florida	https://www.gem.wiki/Fort_Myers_power_station	L100000401948	G100000414271	US65339F1012	1	2682		50	2014	2054	2094	62	62	62	62	62	62	62	62	62	62	0	0
oil/gas	United States	Americas	Northern America	Fort Myers power station	GT1			62	operating	1974		GT	FO					Florida Power & Light Co [100.0%]	NextEra Energy Inc [100.0%]	26.6967	-81.7831	exact	Ft. Myers	Lee		Florida	https://www.gem.wiki/Fort_Myers_power_station	L100000401948	G100000414270	US65339F1012	1	2682		50	2014	2054	2094	62	62	62	62	62	62	62	62	62	62	0	0
oil/gas	United States	Americas	Northern America	Fort Myers power station	F901			1722	operating	2001		CC	NG/FO					Florida Power & Light Co [100.0%]	NextEra Energy Inc [100.0%]	26.6967	-81.7831	exact	Ft. Myers	Lee		Florida	https://www.gem.wiki/Fort_Myers_power_station	L100000401948	G100000402113	US65339F1012	1	2682		23	2041	2081	2121	1722	1722	1722	1722	1722	1722	1722	1722	1722	1722	1722	1722
oil/gas	United States	Americas	Northern America	Fort Myers power station	CT1			188	operating	2003		GT	NG/FO					Florida Power & Light Co [100.0%]	NextEra Energy Inc [100.0%]	26.6967	-81.7831	exact	Ft. Myers	Lee		Florida	https://www.gem.wiki/Fort_Myers_power_station	L100000401948	G100000402902	US65339F1012	1	2682		21	2043	2083	2123	188	188	188	188	188	188	188	188	188	188	188	188
oil/gas	United States	Americas	Northern America	Fort Myers power station	CT2			188	operating	2003		GT	NG/FO					Florida Power & Light Co [100.0%]	NextEra Energy Inc [100.0%]	26.6967	-81.7831	exact	Ft. Myers	Lee		Florida	https://www.gem.wiki/Fort_Myers_power_station	L100000401948	G100000402903	US65339F1012	1	2682		21	2043	2083	2123	188	188	188	188	188	188	188	188	188	188	188	188
oil/gas	United States	Americas	Northern America	Fort Myers power station	PFM3C			230	operating	2016		GT	NG/FO					Florida Power & Light Co [100.0%]	NextEra Energy Inc [100.0%]	26.6967	-81.7831	exact	Ft. Myers	Lee		Florida	https://www.gem.wiki/Fort_Myers_power_station	L100000401948	G100000402904	US65339F1012	1	2682		8	2056	2096	2136	230	230	230	230	230	230	230	230	230	230	230	230
oil/gas	United States	Americas	Northern America	Fort Myers power station	PFM3D			230	operating	2016		GT	NG/FO					Florida Power & Light Co [100.0%]	NextEra Energy Inc [100.0%]	26.6967	-81.7831	exact	Ft. Myers	Lee		Florida	https://www.gem.wiki/Fort_Myers_power_station	L100000401948	G100000402905	US65339F1012	1	2682	2682	8	2056	2096	2136	230	230	230	230	230	230	230	230	230	230	230	230
oil/gas	United States	Americas	Northern America	Gulf Clean Energy Center	4		Crist plant	93.7	operating	2021		ST	NG					Florida Power & Light Co [100.0%]	NextEra Energy Inc [100.0%]	30.5661	-87.2244	exact	Pensacola	Escambia		Florida	https://www.gem.wiki/Gulf_Clean_Energy_Center	L100000103824	G100000411172	US65339F1012	1	2107.4		3	2061	2101	2141	0	93.7	93.7	93.7	93.7	93.7	93.7	93.7	93.7	93.7	93.7	93.7
oil/gas	United States	Americas	Northern America	Gulf Clean Energy Center	5		Crist plant	93.7	operating	2021		ST	NG					Florida Power & Light Co [100.0%]	NextEra Energy Inc [100.0%]	30.5661	-87.2244	exact	Pensacola	Escambia		Florida	https://www.gem.wiki/Gulf_Clean_Energy_Center	L100000103824	G100000411171	US65339F1012	1	2107.4		3	2061	2101	2141	0	93.7	93.7	93.7	93.7	93.7	93.7	93.7	93.7	93.7	93.7	93.7
oil/gas	United States	Americas	Northern America	Gulf Clean Energy Center	6		Crist plant	370	operating	2021		ST	NG					Florida Power & Light Co [100.0%]	NextEra Energy Inc [100.0%]	30.5661	-87.2244	exact	Pensacola	Escambia		Florida	https://www.gem.wiki/Gulf_Clean_Energy_Center	L100000103824	G100000409445	US65339F1012	1	2107.4		3	2061	2101	2141	0	370	370	370	370	370	370	370	370	370	370	370
oil/gas	United States	Americas	Northern America	Gulf Clean Energy Center	7		Crist plant	578	operating	2021		ST	NG					Florida Power & Light Co [100.0%]	NextEra Energy Inc [100.0%]	30.5661	-87.2244	exact	Pensacola	Escambia		Florida	https://www.gem.wiki/Gulf_Clean_Energy_Center	L100000103824	G100000409444	US65339F1012	1	2107.4		3	2061	2101	2141	0	578	578	578	578	578	578	578	578	578	578	578
oil/gas	United States	Americas	Northern America	Gulf Clean Energy Center	8A		Crist plant	243	operating	2021		GT	NG/FO					Florida Power & Light Co [100.0%]	NextEra Energy Inc [100.0%]	30.5661	-87.2244	exact	Pensacola	Escambia		Florida	https://www.gem.wiki/Gulf_Clean_Energy_Center	L100000103824	G100000410533	US65339F1012	1	2107.4		3	2061	2101	2141	0	243	243	243	243	243	243	243	243	243	243	243
oil/gas	United States	Americas	Northern America	Gulf Clean Energy Center	8B		Crist plant	243	operating	2021		GT	NG/FO					Florida Power & Light Co [100.0%]	NextEra Energy Inc [100.0%]	30.5661	-87.2244	exact	Pensacola	Escambia		Florida	https://www.gem.wiki/Gulf_Clean_Energy_Center	L100000103824	G100000410532	US65339F1012	1	2107.4		3	2061	2101	2141	0	243	243	243	243	243	243	243	243	243	243	243
oil/gas	United States	Americas	Northern America	Gulf Clean Energy Center	8C		Crist plant	243	operating	2021		GT	NG/FO					Florida Power & Light Co [100.0%]	NextEra Energy Inc [100.0%]	30.5661	-87.2244	exact	Pensacola	Escambia		Florida	https://www.gem.wiki/Gulf_Clean_Energy_Center	L100000103824	G100000410531	US65339F1012	1	2107.4		3	2061	2101	2141	0	243	243	243	243	243	243	243	243	243	243	243
oil/gas	United States	Americas	Northern America	Gulf Clean Energy Center	8D		Crist plant	243	operating	2021		GT	NG/FO					Florida Power & Light Co [100.0%]	NextEra Energy Inc [100.0%]	30.5661	-87.2244	exact	Pensacola	Escambia		Florida	https://www.gem.wiki/Gulf_Clean_Energy_Center	L100000103824	G100000410530	US65339F1012	1	2107.4	2107.4	3	2061	2101	2141	0	243	243	243	243	243	243	243	243	243	243	243
oil/gas	United States	Americas	Northern America	Lauderdale power station	6A			230	operating	2016		GT	NG/FO					Florida Power & Light Co [100.0%]	NextEra Energy Inc [100.0%]	26.0686	-80.1984	exact	Ft. Lauderdale	Broward		Florida	https://www.gem.wiki/Lauderdale_power_station	L100000401949	G100000402906	US65339F1012	1	2313		8	2056	2096	2136	230	230	230	230	230	230	230	230	230	230	230	230
oil/gas	United States	Americas	Northern America	Lauderdale power station	6B			230	operating	2016		GT	NG/FO					Florida Power & Light Co [100.0%]	NextEra Energy Inc [100.0%]	26.0686	-80.1984	exact	Ft. Lauderdale	Broward		Florida	https://www.gem.wiki/Lauderdale_power_station	L100000401949	G100000402907	US65339F1012	1	2313		8	2056	2096	2136	230	230	230	230	230	230	230	230	230	230	230	230
oil/gas	United States	Americas	Northern America	Lauderdale power station	6C			230	operating	2016		GT	NG/FO					Florida Power & Light Co [100.0%]	NextEra Energy Inc [100.0%]	26.0686	-80.1984	exact	Ft. Lauderdale	Broward		Florida	https://www.gem.wiki/Lauderdale_power_station	L100000401949	G100000402908	US65339F1012	1	2313		8	2056	2096	2136	230	230	230	230	230	230	230	230	230	230	230	230
oil/gas	United States	Americas	Northern America	Lauderdale power station	6D			230	operating	2016		GT	NG/FO					Florida Power & Light Co [100.0%]	NextEra Energy Inc [100.0%]	26.0686	-80.1984	exact	Ft. Lauderdale	Broward		Florida	https://www.gem.wiki/Lauderdale_power_station	L100000401949	G100000402909	US65339F1012	1	2313		8	2056	2096	2136	230	230	230	230	230	230	230	230	230	230	230	230
oil/gas	United States	Americas	Northern America	Lauderdale power station	6E			230	operating	2016		GT	NG/FO					Florida Power & Light Co [100.0%]	NextEra Energy Inc [100.0%]	26.0686	-80.1984	exact	Ft. Lauderdale	Broward		Florida	https://www.gem.wiki/Lauderdale_power_station	L100000401949	G100000402910	US65339F1012	1	2313		8	2056	2096	2136	230	230	230	230	230	230	230	230	230	230	230	230
oil/gas	United States	Americas	Northern America	Lauderdale power station	DBCC		Dania Beach Energy Center	1163	operating	2022		CC	NG/FO					Florida Power & Light Co [100.0%]	NextEra Energy Inc [100.0%]	26.0686	-80.1984	exact	Ft. Lauderdale	Broward		Florida	https://www.gem.wiki/Lauderdale_power_station	L100000401949	G100000402115	US65339F1012	1	2313	2313	2	2062	2102	2142	0	0	1163	1163	1163	1163	1163	1163	1163	1163	1163	1163
oil/gas	United States	Americas	Northern America	Manatee power station	1			863	operating	1976		ST	NG/FO					Florida Power & Light Co [100.0%]	NextEra Energy Inc [100.0%]	27.6058	-82.3456	exact	Parrish	Manatee		Florida	https://www.gem.wiki/Manatee_power_station	L100000401950	G100000409498	US65339F1012	1	2951		48	2016	2056	2096	863	863	863	863	863	863	863	863	863	863	863	0
oil/gas	United States	Americas	Northern America	Manatee power station	2			863	operating	1977		ST	NG/FO					Florida Power & Light Co [100.0%]	NextEra Energy Inc [100.0%]	27.6058	-82.3456	exact	Parrish	Manatee		Florida	https://www.gem.wiki/Manatee_power_station	L100000401950	G100000409497	US65339F1012	1	2951		47	2017	2057	2097	863	863	863	863	863	863	863	863	863	863	863	0
oil/gas	United States	Americas	Northern America	Manatee power station	G341			1225	operating	2005		CC	NG/FO					Florida Power & Light Co [100.0%]	NextEra Energy Inc [100.0%]	27.6058	-82.3456	exact	Parrish	Manatee		Florida	https://www.gem.wiki/Manatee_power_station	L100000401950	G100000402093	US65339F1012	1	2951	2951	19	2045	2085	2125	1225	1225	1225	1225	1225	1225	1225	1225	1225	1225	1225	1225
oil/gas	United States	Americas	Northern America	Martin Point power station	C796			612	operating	1994		CC	NG/FO					Florida Power & Light Co [100.0%]	NextEra Energy Inc [100.0%]	27.0536	-80.5628	exact	Indiantown	Martin		Florida	https://www.gem.wiki/Martin_Point_power_station	L100000401951	G100000402094	US65339F1012	1	2449		30	2034	2074	2114	612	612	612	612	612	612	612	612	612	612	612	612
oil/gas	United States	Americas	Northern America	Martin Point power station	C797			612	operating	1994		CC	NG/FO					Florida Power & Light Co [100.0%]	NextEra Energy Inc [100.0%]	27.0536	-80.5628	exact	Indiantown	Martin		Florida	https://www.gem.wiki/Martin_Point_power_station	L100000401951	G100000402095	US65339F1012	1	2449		30	2034	2074	2114	612	612	612	612	612	612	612	612	612	612	612	612
oil/gas	United States	Americas	Northern America	Martin Point power station	G342			1225	operating	2005		ISCC	NG/FO					Florida Power & Light Co [100.0%]	NextEra Energy Inc [100.0%]	27.0536	-80.5628	exact	Indiantown	Martin		Florida	https://www.gem.wiki/Martin_Point_power_station	L100000401951	G100000402096	US65339F1012	1	2449	2449	19	2045	2085	2125	1225	1225	1225	1225	1225	1225	1225	1225	1225	1225	1225	1225
oil/gas	United States	Americas	Northern America	Okeechobee Clean energy center	CC1			1723	operating	2019		CC	NG/FO					Florida Power & Light Co [100.0%]	NextEra Energy Inc [100.0%]	27.6342	-80.7911	exact	Okeechobee	Okeechobee		Florida	https://www.gem.wiki/Okeechobee_Clean_energy_center	L100000401952	G100000402090	US65339F1012	1	1723	1723	5	2059	2099	2139	1723	1723	1723	1723	1723	1723	1723	1723	1723	1723	1723	1723
oil/gas	United States	Americas	Northern America	Oleander power project	OG1			199	operating	2002		GT	NG/FO					Oleander Holdings LLC [100.0%]	NextEra Energy Inc [100.0%]	28.3661	-80.7947	exact	Cocoa	Brevard		Florida	https://www.gem.wiki/Oleander_power_project	L100000402171	G100000403332	US65339F1012	1	995		22	2042	2082	2122	199	199	199	199	199	199	199	199	199	199	199	199
oil/gas	United States	Americas	Northern America	Oleander power project	OG2			199	operating	2002		GT	NG/FO					Oleander Holdings LLC [100.0%]	NextEra Energy Inc [100.0%]	28.3661	-80.7947	exact	Cocoa	Brevard		Florida	https://www.gem.wiki/Oleander_power_project	L100000402171	G100000403333	US65339F1012	1	995		22	2042	2082	2122	199	199	199	199	199	199	199	199	199	199	199	199
oil/gas	United States	Americas	Northern America	Oleander power project	OG3			199	operating	2002		GT	NG/FO					Oleander Holdings LLC [100.0%]	NextEra Energy Inc [100.0%]	28.3661	-80.7947	exact	Cocoa	Brevard		Florida	https://www.gem.wiki/Oleander_power_project	L100000402171	G100000403334	US65339F1012	1	995		22	2042	2082	2122	199	199	199	199	199	199	199	199	199	199	199	199
oil/gas	United States	Americas	Northern America	Oleander power project	OG4			199	operating	2002		GT	NG/FO					Oleander Holdings LLC [100.0%]	NextEra Energy Inc [100.0%]	28.3661	-80.7947	exact	Cocoa	Brevard		Florida	https://www.gem.wiki/Oleander_power_project	L100000402171	G100000403335	US65339F1012	1	995		22	2042	2082	2122	199	199	199	199	199	199	199	199	199	199	199	199
oil/gas	United States	Americas	Northern America	Oleander power project	OG5			199	operating	2007		GT	NG/FO					Oleander Holdings LLC [100.0%]	NextEra Energy Inc [100.0%]	28.3661	-80.7947	exact	Cocoa	Brevard		Florida	https://www.gem.wiki/Oleander_power_project	L100000402171	G100000403336	US65339F1012	1	995	995	17	2047	2087	2127	199	199	199	199	199	199	199	199	199	199	199	199
oil/gas	United States	Americas	Northern America	Port Everglades power station	CC1			1352	operating	2016		CC	NG/FO					Florida Power & Light Co [100.0%]	NextEra Energy Inc [100.0%]	26.0856	-80.1253	exact	Ft. Lauderdale	Broward		Florida	https://www.gem.wiki/Port_Everglades_power_station	L100000401953	G100000402116	US65339F1012	1	1352	1352	8	2056	2096	2136	1352	1352	1352	1352	1352	1352	1352	1352	1352	1352	1352	1352
oil/gas	United States	Americas	Northern America	Riviera power station	PRV			1295	operating	2014		CC	NG/FO					Florida Power & Light Co [100.0%]	NextEra Energy Inc [100.0%]	26.7653	-80.0525	exact	Riviera Beach	Palm Beach		Florida	https://www.gem.wiki/Riviera_power_station	L100000401954	G100000402117	US65339F1012	1	1295	1295	10	2054	2094	2134	1295	1295	1295	1295	1295	1295	1295	1295	1295	1295	1295	1295
oil/gas	United States	Americas	Northern America	Sanford power station	G161			1189	operating	2002		CC	NG					Florida Power & Light Co [100.0%]	NextEra Energy Inc [100.0%]	28.8419	-81.3256	exact	DeBary	Volusia		Florida	https://www.gem.wiki/Sanford_power_station	L100000401955	G100000402119	US65339F1012	1	2378		22	2042	2082	2122	1189	1189	1189	1189	1189	1189	1189	1189	1189	1189	1189	1189
oil/gas	United States	Americas	Northern America	Sanford power station	G160			1189	operating	2003		CC	NG					Florida Power & Light Co [100.0%]	NextEra Energy Inc [100.0%]	28.8419	-81.3256	exact	DeBary	Volusia		Florida	https://www.gem.wiki/Sanford_power_station	L100000401955	G100000402118	US65339F1012	1	2378	2378	21	2043	2083	2123	1189	1189	1189	1189	1189	1189	1189	1189	1189	1189	1189	1189
oil/gas	United States	Americas	Northern America	Turkey Point power station	G901			1224	operating	2007		CC	NG/FO					Florida Power & Light Co [100.0%]	NextEra Energy Inc [100.0%]	25.4356	-80.3308	exact	Homestead	Miami Dade		Florida	https://www.gem.wiki/Turkey_Point_power_station	L100000401956	G100000402123	US65339F1012	1	1224	1224	17	2047	2087	2127	1224	1224	1224	1224	1224	1224	1224	1224	1224	1224	1224	1224
oil/gas	United States	Americas	Northern America	West County energy center	WC1			1421	operating	2009		CC	NG/FO					Florida Power & Light Co [100.0%]	NextEra Energy Inc [100.0%]	26.6986	-80.3747	exact	Loxahatchee	Palm Beach		Florida	https://www.gem.wiki/West_County_energy_center	L100000401957	G100000402020	US65339F1012	1	4263		15	2049	2089	2129	1421	1421	1421	1421	1421	1421	1421	1421	1421	1421	1421	1421
oil/gas	United States	Americas	Northern America	West County energy center	WC2			1421	operating	2009		CC	NG/FO					Florida Power & Light Co [100.0%]	NextEra Energy Inc [100.0%]	26.6986	-80.3747	exact	Loxahatchee	Palm Beach		Florida	https://www.gem.wiki/West_County_energy_center	L100000401957	G100000402021	US65339F1012	1	4263		15	2049	2089	2129	1421	1421	1421	1421	1421	1421	1421	1421	1421	1421	1421	1421
oil/gas	United States	Americas	Northern America	West County energy center	WC3			1421	operating	2011		CC	NG/FO					Florida Power & Light Co [100.0%]	NextEra Energy Inc [100.0%]	26.6986	-80.3747	exact	Loxahatchee	Palm Beach		Florida	https://www.gem.wiki/West_County_energy_center	L100000401957	G100000402022	US65339F1012	1	4263	4263	13	2051	2091	2131	1421	1421	1421	1421	1421	1421	1421	1421	1421	1421	1421	1421
oil/gas	United States	Americas	Northern America	William F Wyman Hybrid power station	1			50	operating	1957		ST	HFO					FPL Energy Wyman LLC [100.0%]	NextEra Energy Maine LLC	43.7508	-70.1567	exact	Yarmouth	Cumberland		Maine	https://www.gem.wiki/William_F_Wyman_Hybrid_power_station	L100000409248	G100000414159	US65339F1012	1	846		67	1997	2037	2077	50	50	50	50	50	50	50	50	50	50	50	50
oil/gas	United States	Americas	Northern America	William F Wyman Hybrid power station	2			50	operating	1958		ST	HFO					FPL Energy Wyman LLC [100.0%]	NextEra Energy Maine LLC	43.7508	-70.1567	exact	Yarmouth	Cumberland		Maine	https://www.gem.wiki/William_F_Wyman_Hybrid_power_station	L100000409248	G100000414158	US65339F1012	1	846		66	1998	2038	2078	50	50	50	50	50	50	50	50	50	50	50	50
oil/gas	United States	Americas	Northern America	William F Wyman Hybrid power station	3			113.6	operating	1965		ST	HFO					FPL Energy Wyman LLC [100.0%]	NextEra Energy Maine LLC	43.7508	-70.1567	exact	Yarmouth	Cumberland		Maine	https://www.gem.wiki/William_F_Wyman_Hybrid_power_station	L100000409248	G100000414157	US65339F1012	1	846		59	2005	2045	2085	113.6	113.6	113.6	113.6	113.6	113.6	113.6	113.6	113.6	113.6	113.6	113.6
oil/gas	United States	Americas	Northern America	William F Wyman Hybrid power station	4			632.4	operating	1978		ST	HFO					FPL Energy Wyman LLC [84.3%]; Constellation Nuclear LLC [5.9%]; Massachusetts Mun Wholes Electric Co [3.7%]; Public Service Company of New Hampshire [3.1%]; other [2.9%]	Eversource Energy [3.1%]; Constellation Energy Corp; NextEra Energy Maine LLC	43.7508	-70.1567	exact	Yarmouth	Cumberland		Maine	https://www.gem.wiki/William_F_Wyman_Hybrid_power_station	L100000409248	G100000414156	US65339F1012	0.33	846	846	46	2018	2058	2098	208.692	208.692	208.692	208.692	208.692	208.692	208.692	208.692	208.692	208.692	208.692	0
solar	United States	Americas	Northern America	Adelanto Solar				20	operating	2015		PV						NextEra Energy INC		34.5572	-117.377	exact		San Bernardino County		California	https://gem.wiki/Adelanto_Solar	L804609	G805322	US65339F1012	1	20	20	9	2055	2095	2135	20	20	20	20	20	20	20	20	20	20	20	20
solar	United States	Americas	Northern America	Appleseed Solar				200	pre-construction	2023		PV						NextEra Energy INC		40.7202	-86.2911	approximate		Cass County		Indiana	https://gem.wiki/Appleseed_Solar	L808383	G810574	US65339F1012	1	200	200	1	2063	2103	2143	0	0	0	200	200	200	200	200	200	200	200	200
solar	United States	Americas	Northern America	Arlington Energy Center (NextEra) solar farm	1			100	operating	2022		PV						NextEra Energy INC		33.6909	-114.775	exact	Blythe	Riverside County		California	https://gem.wiki/Arlington_Energy_Center_(NextEra)_solar_farm	L804610	G805323	US65339F1012	1	364		2	2062	2102	2142	0	0	100	100	100	100	100	100	100	100	100	100
solar	United States	Americas	Northern America	Arlington Energy Center (NextEra) solar farm	3			131	operating	2022		PV						NextEra Energy INC		33.6909	-114.775	exact	Blythe	Riverside County		California	https://gem.wiki/Arlington_Energy_Center_(NextEra)_solar_farm	L804610	G805324	US65339F1012	1	364		2	2062	2102	2142	0	0	131	131	131	131	131	131	131	131	131	131
solar	United States	Americas	Northern America	Arlington Energy Center (NextEra) solar farm	2			133	construction	2023		PV						NextEra Energy INC		33.6909	-114.775	exact	Blythe	Riverside County		California	https://gem.wiki/Arlington_Energy_Center_(NextEra)_solar_farm	L804610	G805325	US65339F1012	1	364	364	1	2063	2103	2143	0	0	0	133	133	133	133	133	133	133	133	133
solar	United States	Americas	Northern America	Babbitt Ranch Solar			Babbitt Ranch Energy	60	announced	2025		PV						NextEra Energy INC		32.0838	-110.867	approximate		Coconico County		Arizona	https://gem.wiki/Babbitt_Ranch_Solar	L805170	G805951	US65339F1012	1	60	60	-1	2065	2105	2145	0	0	0	0	0	60	60	60	60	60	60	60
solar	United States	Americas	Northern America	Babcock Preserve solar farm				74	operating	2020		PV						NextEra Energy INC		26.854	-81.725	exact		Charlotte County		Florida	https://gem.wiki/Babcock_Preserve_solar_farm	L804611	G805326	US65339F1012	1	74		4	2060	2100	2140	74	74	74	74	74	74	74	74	74	74	74	74
solar	United States	Americas	Northern America	Babcock Solar Energy Center Hybrid			Babcock Ranch Solar	74	operating	2016		PV						NextEra Energy INC		26.865	-81.741	exact		Charlotte County		Florida	https://gem.wiki/Babcock_Solar_Energy_Center_Hybrid	L804612	G805327	US65339F1012	1	74		8	2056	2096	2136	74	74	74	74	74	74	74	74	74	74	74	74
solar	United States	Americas	Northern America	Barefoot Bay Solar Energy Center				74	operating	2018		PV						NextEra Energy INC		27.8658	-80.5211	exact		Brevard County		Florida	https://gem.wiki/Barefoot_Bay_Solar_Energy_Center	L804613	G805328	US65339F1012	1	74		6	2058	2098	2138	74	74	74	74	74	74	74	74	74	74	74	74
solar	United States	Americas	Northern America	Bell Ridge Solar				74	construction	2023		PV						NextEra Energy INC		29.7187	-82.7108	exact		Gilchrist County		Florida	https://gem.wiki/Bell_Ridge_Solar	L808389	G810580	US65339F1012	1	74	74	1	2063	2103	2143	0	0	0	74	74	74	74	74	74	74	74	74
solar	United States	Americas	Northern America	Big Cypress Solar				180	pre-construction	2023		PV						NextEra Energy INC		35.3446	-90.3075	approximate		Crittenden County		Arkansas	https://gem.wiki/Big_Cypress_Solar	L808391	G810585	US65339F1012	1	180	180	1	2063	2103	2143	0	0	0	180	180	180	180	180	180	180	180	180
solar	United States	Americas	Northern America	Blackburn Solar				58	pre-construction			PV						NextEra Energy INC		35.5761	-81.2981	approximate		Catawba County		North Carolina	https://gem.wiki/Blackburn_Solar	L808392	G810586	US65339F1012	1	58	58	-99	40	80	120	0	0	0	0	0	0	0	0	0	58	58	58
solar	United States	Americas	Northern America	Blue Cypress Solar Energy Center				74	operating	2018		PV						NextEra Energy INC		27.601	-80.533	exact		Indian River County		Florida	https://gem.wiki/Blue_Cypress_Solar_Energy_Center	L804614	G805329	US65339F1012	1	74		6	2058	2098	2138	74	74	74	74	74	74	74	74	74	74	74	74
solar	United States	Americas	Northern America	Blue Heron Solar				74	operating	2020		PV						NextEra Energy INC		26.7016	-81.1292	exact		Hendry County		Florida	https://gem.wiki/Blue_Heron_Solar	L804615	G805330	US65339F1012	1	74	74	4	2060	2100	2140	74	74	74	74	74	74	74	74	74	74	74	74
solar	United States	Americas	Northern America	Blue Springs solar farm				75	operating	2022		PV						NextEra Energy INC		30.7829	-85.0787	exact	Marianna	Jackson County		Florida	https://gem.wiki/Blue_Springs_solar_farm	L804616	G805331	US65339F1012	1	75	75	2	2062	2102	2142	0	0	75	75	75	75	75	75	75	75	75	75
solar	United States	Americas	Northern America	Bluebell Solar	1			30	operating	2018		PV						NextEra Energy INC		31.8701	-100.828	exact		Sterling County		Texas	https://gem.wiki/Bluebell_Solar	L805171	G805952	US65339F1012	1	145		6	2058	2098	2138	30	30	30	30	30	30	30	30	30	30	30	30
solar	United States	Americas	Northern America	Bluebell Solar	2			115	operating	2020		PV						NextEra Energy INC		31.889	-100.842	exact		Sterling County		Texas	https://gem.wiki/Bluebell_Solar	L805171	G805953	US65339F1012	1	145	145	4	2060	2100	2140	115	115	115	115	115	115	115	115	115	115	115	115
solar	United States	Americas	Northern America	Blythe (NextEra) solar farm	1A		Blythe Solar 110	39	operating	2016		PV						NextEra Energy INC		33.6801	-114.742	exact		Riverside County		California	https://gem.wiki/Blythe_(NextEra)_solar_farm	L805172	G805960	US65339F1012	1	516		8	2056	2096	2136	39	39	39	39	39	39	39	39	39	39	39	39
solar	United States	Americas	Northern America	Blythe (NextEra) solar farm	1B		Blythe Solar 110	36	operating	2016		PV						NextEra Energy INC		33.6801	-114.742	exact		Riverside County		California	https://gem.wiki/Blythe_(NextEra)_solar_farm	L805172	G805959	US65339F1012	1	516		8	2056	2096	2136	36	36	36	36	36	36	36	36	36	36	36	36
solar	United States	Americas	Northern America	Blythe (NextEra) solar farm	1C		Blythe Solar 110	35	operating	2016		PV						NextEra Energy INC		33.6801	-114.742	exact		Riverside County		California	https://gem.wiki/Blythe_(NextEra)_solar_farm	L805172	G805958	US65339F1012	1	516		8	2056	2096	2136	35	35	35	35	35	35	35	35	35	35	35	35
solar	United States	Americas	Northern America	Blythe (NextEra) solar farm	2A		Blythe Solar II	33	operating	2016		PV						NextEra Energy INC		33.6801	-114.73	exact		Riverside County		California	https://gem.wiki/Blythe_(NextEra)_solar_farm	L805172	G805956	US65339F1012	1	516		8	2056	2096	2136	33	33	33	33	33	33	33	33	33	33	33	33
solar	United States	Americas	Northern America	Blythe (NextEra) solar farm	2B		Blythe Solar II	34	operating	2016		PV						NextEra Energy INC		33.6801	-114.73	exact		Riverside County		California	https://gem.wiki/Blythe_(NextEra)_solar_farm	L805172	G805957	US65339F1012	1	516		8	2056	2096	2136	34	34	34	34	34	34	34	34	34	34	34	34
solar	United States	Americas	Northern America	Blythe (NextEra) solar farm	2C		Blythe Solar II	32	operating	2016		PV						NextEra Energy INC		33.674	-114.744	exact		Riverside County		California	https://gem.wiki/Blythe_(NextEra)_solar_farm	L805172	G805954	US65339F1012	1	516		8	2056	2096	2136	32	32	32	32	32	32	32	32	32	32	32	32
solar	United States	Americas	Northern America	Blythe (NextEra) solar farm	2D		Blythe Solar II	32	operating	2016		PV						NextEra Energy INC		33.674	-114.744	exact		Riverside County		California	https://gem.wiki/Blythe_(NextEra)_solar_farm	L805172	G805955	US65339F1012	1	516		8	2056	2096	2136	32	32	32	32	32	32	32	32	32	32	32	32
solar	United States	Americas	Northern America	Blythe (NextEra) solar farm	3A		Blythe Solar III Hybrid	137	operating	2020		PV						NextEra Energy INC		33.656	-114.742	exact		Riverside County		California	https://gem.wiki/Blythe_(NextEra)_solar_farm	L805172	G805963	US65339F1012	1	516		4	2060	2100	2140	137	137	137	137	137	137	137	137	137	137	137	137
solar	United States	Americas	Northern America	Blythe (NextEra) solar farm	4A		Blythe Solar IV	69	operating	2020		PV						NextEra Energy INC		33.682	-114.768	exact		Riverside County		California	https://gem.wiki/Blythe_(NextEra)_solar_farm	L805172	G805961	US65339F1012	1	516		4	2060	2100	2140	69	69	69	69	69	69	69	69	69	69	69	69
solar	United States	Americas	Northern America	Blythe (NextEra) solar farm	4B		Blythe Solar IV	69	operating	2020		PV						NextEra Energy INC		33.682	-114.768	exact		Riverside County		California	https://gem.wiki/Blythe_(NextEra)_solar_farm	L805172	G805962	US65339F1012	1	516	516	4	2060	2100	2140	69	69	69	69	69	69	69	69	69	69	69	69
solar	United States	Americas	Northern America	Boulder Flats Solar				113	construction	2024		PV						NextEra Energy INC		35.8789	-114.983	exact	Wadsworth	Washoe County		Nevada	https://gem.wiki/Boulder_Flats_Solar	L805173	G805964	US65339F1012	1	113	113	0	2064	2104	2144	0	0	0	0	113	113	113	113	113	113	113	113
solar	United States	Americas	Northern America	Bowling Green Solar			DG AMP Solar Bowling Green	20	operating	2017		PV						NextEra Energy INC		41.396	-83.582	exact		Wood County		Ohio	https://gem.wiki/Bowling_Green_Solar	L804617	G805332	US65339F1012	1	20		7	2057	2097	2137	20	20	20	20	20	20	20	20	20	20	20	20
solar	United States	Americas	Northern America	Briel Farm solar farm				20	operating	2021		PV						NextEra Energy INC		37.5236	-77.2636	exact		Henrico County		Virginia	https://gem.wiki/Briel_Farm_solar_farm	L804619	G805334	US65339F1012	1	20	20	3	2061	2101	2141	0	20	20	20	20	20	20	20	20	20	20	20
solar	United States	Americas	Northern America	Buena Vista Solar Project			Otero Solar	120	operating	2023		PV						NextEra Energy INC		32.075	-106.333	approximate		Otero County		New Mexico	https://gem.wiki/Buena_Vista_Solar_Project	L805174	G805965	US65339F1012	1	120	120	1	2063	2103	2143	0	0	0	120	120	120	120	120	120	120	120	120
solar	United States	Americas	Northern America	Calverton Solar Energy Center				23	operating	2022		PV						NextEra Energy		40.9137	-72.7504	exact		Suffolk County		New York	https://gem.wiki/Calverton_Solar_Energy_Center	L832763	G838359	US65339F1012	1	23	23	2	2062	2102	2142	0	0	23	23	23	23	23	23	23	23	23	23
solar	United States	Americas	Northern America	Cattle Ranch solar farm				74	operating	2020		PV						NextEra Energy INC		27.3219	-81.8091	exact		DeSoto County		Florida	https://gem.wiki/Cattle_Ranch_solar_farm	L804620	G805335	US65339F1012	1	74	74	4	2060	2100	2140	74	74	74	74	74	74	74	74	74	74	74	74
solar	United States	Americas	Northern America	Cavalry Solar				200	pre-construction	2024		PV						NextEra Energy INC; Northern Indiana Public Service Company LLC (NIPSCO)		40.6304	-79.1446	approximate		White County		Indiana	https://gem.wiki/Cavalry_Solar	L804679	G805394	US65339F1012	0.5	200		0	2064	2104	2144	0	0	0	0	100	100	100	100	100	100	100	100
solar	United States	Americas	Northern America	Cayuga Solar				200	announced	2023		PV						NextEra Energy INC		42.7105	-76.421	approximate		Cayuga County		New York	https://gem.wiki/Cayuga_Solar	L832777	G838374	US65339F1012	1	200	200	1	2063	2103	2143	0	0	0	200	200	200	200	200	200	200	200	200
solar	United States	Americas	Northern America	Cereal City Solar				100	pre-construction	2023		PV						NextEra Energy INC		42.3058	-85.0323	approximate		Calhoun County		Michigan	https://gem.wiki/Cereal_City_Solar	L805176	G805967	US65339F1012	1	100	100	1	2063	2103	2143	0	0	0	100	100	100	100	100	100	100	100	100
solar	United States	Americas	Northern America	Chaves Solar				70	operating	2016		PV						NextEra Energy INC		33.4501	-104.456	exact	Roswell	Chaves County		New Mexico	https://gem.wiki/Chaves_Solar	L804621	G805336	US65339F1012	1	70	70	8	2056	2096	2136	70	70	70	70	70	70	70	70	70	70	70	70
solar	United States	Americas	Northern America	Chesapeake solar farm				118	construction	2023		PV						NextEra Energy INC		39.4564	-77.9663	approximate				Virginia	https://gem.wiki/Chesapeake_solar_farm	L805354	G806184	US65339F1012	1	118	118	1	2063	2103	2143	0	0	0	118	118	118	118	118	118	118	118	118
solar	United States	Americas	Northern America	Chicot Solar			Lake Village	100	operating	2020		PV						NextEra Energy INC		33.479	-91.349	exact		Chicot County		Arkansas	https://gem.wiki/Chicot_Solar	L804622	G805337	US65339F1012	1	100	100	4	2060	2100	2140	100	100	100	100	100	100	100	100	100	100	100	100
solar	United States	Americas	Northern America	Citrus Solar Energy Center Hybrid				74	operating	2016		PV						NextEra Energy INC		27.3209	-81.8069	exact		DeSoto County		Florida	https://gem.wiki/Citrus_Solar_Energy_Center_Hybrid	L804623	G805338	US65339F1012	1	74	74	8	2056	2096	2136	74	74	74	74	74	74	74	74	74	74	74	74
solar	United States	Americas	Northern America	Coolidge Solar				19.6	operating	2018		PV						NextEra Energy INC		43.4282	-72.6653	exact	Ludlow	Windsor		Vermont	https://gem.wiki/Coolidge_Solar	L808409	G810609	US65339F1012	1	19.6	19.6	6	2058	2098	2138	19.6	19.6	19.6	19.6	19.6	19.6	19.6	19.6	19.6	19.6	19.6	19.6
solar	United States	Americas	Northern America	Coral Farms Solar Energy Center				74	operating	2018		PV						NextEra Energy INC		29.7569	-81.8972	exact		Putnam County		Florida	https://gem.wiki/Coral_Farms_Solar_Energy_Center	L804624	G805339	US65339F1012	1	74	74	6	2058	2098	2138	74	74	74	74	74	74	74	74	74	74	74	74
solar	United States	Americas	Northern America	Dallas Solar Project				80	pre-construction	2023		PV						NextEra Energy INC		32.4395	-87.0597	approximate		Selma County		Alabama	https://gem.wiki/Dallas_Solar_Project	L805178	G805969	US65339F1012	1	80	80	1	2063	2103	2143	0	0	0	80	80	80	80	80	80	80	80	80
solar	United States	Americas	Northern America	Desert Sunlight 250 solar farm	12			29	operating	2013		PV						Clearway Energy Group [25.0%]; Harbert Power Fund V (HPF V) [24.9%]; NextEra Energy Partners LP [49.9%]; Other [0.2%]		33.8055	-115.395	exact		Riverside County		California	https://gem.wiki/Desert_Sunlight_250_solar_farm	L808416	G810618	US65339F1012	0.499	248.9		11	2053	2093	2133	14.471	14.471	14.471	14.471	14.471	14.471	14.471	14.471	14.471	14.471	14.471	14.471
solar	United States	Americas	Northern America	Desert Sunlight 250 solar farm	13			25	operating	2013		PV						Clearway Energy Group [25.0%]; Harbert Power Fund V (HPF V) [24.9%]; NextEra Energy Partners LP [49.9%]; Other [0.2%]		33.8055	-115.395	exact		Riverside County		California	https://gem.wiki/Desert_Sunlight_250_solar_farm	L808416	G810619	US65339F1012	0.499	248.9		11	2053	2093	2133	12.475	12.475	12.475	12.475	12.475	12.475	12.475	12.475	12.475	12.475	12.475	12.475
solar	United States	Americas	Northern America	Desert Sunlight 250 solar farm	14			23	operating	2013		PV						Clearway Energy Group [25.0%]; Harbert Power Fund V (HPF V) [24.9%]; NextEra Energy Partners LP [49.9%]; Other [0.2%]		33.8055	-115.395	exact		Riverside County		California	https://gem.wiki/Desert_Sunlight_250_solar_farm	L808416	G810620	US65339F1012	0.499	248.9		11	2053	2093	2133	11.477	11.477	11.477	11.477	11.477	11.477	11.477	11.477	11.477	11.477	11.477	11.477
solar	United States	Americas	Northern America	Desert Sunlight 250 solar farm	16			39	operating	2013		PV						Clearway Energy Group [25.0%]; Harbert Power Fund V (HPF V) [24.9%]; NextEra Energy Partners LP [49.9%]; Other [0.2%]		33.8055	-115.395	exact		Riverside County		California	https://gem.wiki/Desert_Sunlight_250_solar_farm	L808416	G810621	US65339F1012	0.499	248.9		11	2053	2093	2133	19.461	19.461	19.461	19.461	19.461	19.461	19.461	19.461	19.461	19.461	19.461	19.461
solar	United States	Americas	Northern America	Desert Sunlight 250 solar farm	17			39	operating	2014		PV						Clearway Energy Group [25.0%]; Harbert Power Fund V (HPF V) [24.9%]; NextEra Energy Partners LP [49.9%]; Other [0.2%]		33.8055	-115.395	exact		Riverside County		California	https://gem.wiki/Desert_Sunlight_250_solar_farm	L808416	G810622	US65339F1012	0.499	248.9		10	2054	2094	2134	19.461	19.461	19.461	19.461	19.461	19.461	19.461	19.461	19.461	19.461	19.461	19.461
solar	United States	Americas	Northern America	Desert Sunlight 250 solar farm	18			26	operating	2014		PV						Clearway Energy Group [25.0%]; Harbert Power Fund V (HPF V) [24.9%]; NextEra Energy Partners LP [49.9%]; Other [0.2%]		33.8055	-115.395	exact		Riverside County		California	https://gem.wiki/Desert_Sunlight_250_solar_farm	L808416	G810623	US65339F1012	0.499	248.9		10	2054	2094	2134	12.974	12.974	12.974	12.974	12.974	12.974	12.974	12.974	12.974	12.974	12.974	12.974
solar	United States	Americas	Northern America	Desert Sunlight 250 solar farm	19			29	operating	2014		PV						Clearway Energy Group [25.0%]; Harbert Power Fund V (HPF V) [24.9%]; NextEra Energy Partners LP [49.9%]; Other [0.2%]		33.8055	-115.395	exact		Riverside County		California	https://gem.wiki/Desert_Sunlight_250_solar_farm	L808416	G810624	US65339F1012	0.499	248.9		10	2054	2094	2134	14.471	14.471	14.471	14.471	14.471	14.471	14.471	14.471	14.471	14.471	14.471	14.471
solar	United States	Americas	Northern America	Desert Sunlight 250 solar farm	20			25	operating	2014		PV						Clearway Energy Group [25.0%]; Harbert Power Fund V (HPF V) [24.9%]; NextEra Energy Partners LP [49.9%]; Other [0.2%]		33.8055	-115.395	exact		Riverside County		California	https://gem.wiki/Desert_Sunlight_250_solar_farm	L808416	G810625	US65339F1012	0.499	248.9		10	2054	2094	2134	12.475	12.475	12.475	12.475	12.475	12.475	12.475	12.475	12.475	12.475	12.475	12.475
solar	United States	Americas	Northern America	Desert Sunlight 250 solar farm	15			13.9	operating	2014		PV						Clearway Energy Group [25.0%]; Harbert Power Fund V (HPF V) [24.9%]; NextEra Energy Partners LP [49.9%]; Other [0.2%]		33.8055	-115.395	exact		Riverside County		California	https://gem.wiki/Desert_Sunlight_250_solar_farm	L808416	G815385	US65339F1012	0.499	248.9	248.9	10	2054	2094	2134	6.9361	6.9361	6.9361	6.9361	6.9361	6.9361	6.9361	6.9361	6.9361	6.9361	6.9361	6.9361
solar	United States	Americas	Northern America	Desert Sunlight 300 solar farm	1			20	operating	2013		PV						Clearway Energy Group [25.0%]; Harbert Power Fund V (HPF V) [24.9%]; NextEra Energy Partners LP [49.9%]; Other [0.2%]		33.8231	-115.394	exact		Riverside County		California	https://gem.wiki/Desert_Sunlight_300_solar_farm	L808417	G810626	US65339F1012	0.499	293		11	2053	2093	2133	9.98	9.98	9.98	9.98	9.98	9.98	9.98	9.98	9.98	9.98	9.98	9.98
solar	United States	Americas	Northern America	Desert Sunlight 300 solar farm	2			30	operating	2013		PV						Clearway Energy Group [25.0%]; Harbert Power Fund V (HPF V) [24.9%]; NextEra Energy Partners LP [49.9%]; Other [0.2%]		33.8231	-115.394	exact		Riverside County		California	https://gem.wiki/Desert_Sunlight_300_solar_farm	L808417	G810627	US65339F1012	0.499	293		11	2053	2093	2133	14.97	14.97	14.97	14.97	14.97	14.97	14.97	14.97	14.97	14.97	14.97	14.97
solar	United States	Americas	Northern America	Desert Sunlight 300 solar farm	3			30	operating	2013		PV						Clearway Energy Group [25.0%]; Harbert Power Fund V (HPF V) [24.9%]; NextEra Energy Partners LP [49.9%]; Other [0.2%]		33.8231	-115.394	exact		Riverside County		California	https://gem.wiki/Desert_Sunlight_300_solar_farm	L808417	G810628	US65339F1012	0.499	293		11	2053	2093	2133	14.97	14.97	14.97	14.97	14.97	14.97	14.97	14.97	14.97	14.97	14.97	14.97
solar	United States	Americas	Northern America	Desert Sunlight 300 solar farm	4			40	operating	2013		PV						Clearway Energy Group [25.0%]; Harbert Power Fund V (HPF V) [24.9%]; NextEra Energy Partners LP [49.9%]; Other [0.2%]		33.8231	-115.394	exact		Riverside County		California	https://gem.wiki/Desert_Sunlight_300_solar_farm	L808417	G810629	US65339F1012	0.499	293		11	2053	2093	2133	19.96	19.96	19.96	19.96	19.96	19.96	19.96	19.96	19.96	19.96	19.96	19.96
solar	United States	Americas	Northern America	Desert Sunlight 300 solar farm	5			40	operating	2013		PV						Clearway Energy Group [25.0%]; Harbert Power Fund V (HPF V) [24.9%]; NextEra Energy Partners LP [49.9%]; Other [0.2%]		33.8231	-115.394	exact		Riverside County		California	https://gem.wiki/Desert_Sunlight_300_solar_farm	L808417	G810630	US65339F1012	0.499	293		11	2053	2093	2133	19.96	19.96	19.96	19.96	19.96	19.96	19.96	19.96	19.96	19.96	19.96	19.96
solar	United States	Americas	Northern America	Desert Sunlight 300 solar farm	6			40	operating	2013		PV						Clearway Energy Group [25.0%]; Harbert Power Fund V (HPF V) [24.9%]; NextEra Energy Partners LP [49.9%]; Other [0.2%]		33.8231	-115.394	exact		Riverside County		California	https://gem.wiki/Desert_Sunlight_300_solar_farm	L808417	G810631	US65339F1012	0.499	293		11	2053	2093	2133	19.96	19.96	19.96	19.96	19.96	19.96	19.96	19.96	19.96	19.96	19.96	19.96
solar	United States	Americas	Northern America	Desert Sunlight 300 solar farm	10			23	operating	2014		PV						Clearway Energy Group [25.0%]; Harbert Power Fund V (HPF V) [24.9%]; NextEra Energy Partners LP [49.9%]; Other [0.2%]		33.8231	-115.394	exact		Riverside County		California	https://gem.wiki/Desert_Sunlight_300_solar_farm	L808417	G810635	US65339F1012	0.499	293		10	2054	2094	2134	11.477	11.477	11.477	11.477	11.477	11.477	11.477	11.477	11.477	11.477	11.477	11.477
solar	United States	Americas	Northern America	Desert Sunlight 300 solar farm	7			25	operating	2014		PV						Clearway Energy Group [25.0%]; Harbert Power Fund V (HPF V) [24.9%]; NextEra Energy Partners LP [49.9%]; Other [0.2%]		33.8231	-115.394	exact		Riverside County		California	https://gem.wiki/Desert_Sunlight_300_solar_farm	L808417	G810632	US65339F1012	0.499	293		10	2054	2094	2134	12.475	12.475	12.475	12.475	12.475	12.475	12.475	12.475	12.475	12.475	12.475	12.475
solar	United States	Americas	Northern America	Desert Sunlight 300 solar farm	8			20	operating	2014		PV						Clearway Energy Group [25.0%]; Harbert Power Fund V (HPF V) [24.9%]; NextEra Energy Partners LP [49.9%]; Other [0.2%]		33.8231	-115.394	exact		Riverside County		California	https://gem.wiki/Desert_Sunlight_300_solar_farm	L808417	G810633	US65339F1012	0.499	293		10	2054	2094	2134	9.98	9.98	9.98	9.98	9.98	9.98	9.98	9.98	9.98	9.98	9.98	9.98
solar	United States	Americas	Northern America	Desert Sunlight 300 solar farm	9			25	operating	2014		PV						Clearway Energy Group [25.0%]; Harbert Power Fund V (HPF V) [24.9%]; NextEra Energy Partners LP [49.9%]; Other [0.2%]		33.8231	-115.394	exact		Riverside County		California	https://gem.wiki/Desert_Sunlight_300_solar_farm	L808417	G810634	US65339F1012	0.499	293	293	10	2054	2094	2134	12.475	12.475	12.475	12.475	12.475	12.475	12.475	12.475	12.475	12.475	12.475	12.475
solar	United States	Americas	Northern America	Desoto Next Generation Solar Energy				25	operating	2009		PV						NextEra Energy INC		27.3232	-81.8019	exact		DeSoto County		Florida	https://gem.wiki/Desoto_Next_Generation_Solar_Energy	L804625	G805340	US65339F1012	1	25	25	15	2049	2089	2129	25	25	25	25	25	25	25	25	25	25	25	25
solar	United States	Americas	Northern America	Discovery Solar Center				74	operating	2021		PV						NextEra Energy INC		28.5289	-80.6789	exact	Titusville	Brevard County		Florida	https://gem.wiki/Discovery_Solar_Center	L804626	G805341	US65339F1012	1	74	74	3	2061	2101	2141	0	74	74	74	74	74	74	74	74	74	74	74
solar	United States	Americas	Northern America	Dodge Flat solar farm				200	operating	2022		PV						NextEra Energy INC		40.713	-119.467	exact	Reno	Washoe County		Nevada	https://gem.wiki/Dodge_Flat_solar_farm	L805179	G805970	US65339F1012	1	200	200	2	2062	2102	2142	0	0	200	200	200	200	200	200	200	200	200	200
solar	United States	Americas	Northern America	Dothan Solar Project			Houston County Solar Project	80	pre-construction	2023		PV						NextEra Energy INC		31.2307	-85.5347	approximate		Houston County		Alabama	https://gem.wiki/Dothan_Solar_Project	L805180	G805971	US65339F1012	1	80	80	1	2063	2103	2143	0	0	0	80	80	80	80	80	80	80	80	80
solar	United States	Americas	Northern America	Dougherty County Solar				120	operating	2019		PV						NextEra Energy INC		31.512	-84.0445	exact		Dougherty County		Georgia	https://gem.wiki/Dougherty_County_Solar	L805181	G805972	US65339F1012	1	120	120	5	2059	2099	2139	120	120	120	120	120	120	120	120	120	120	120	120
solar	United States	Americas	Northern America	Dunns Bridge solar farm	1			265	construction	2024		PV						NextEra Energy INC		41.1939	-86.9847	exact		Jasper County		Indiana	https://gem.wiki/Dunns_Bridge_solar_farm	L805182	G805974	US65339F1012	1	700		0	2064	2104	2144	0	0	0	0	265	265	265	265	265	265	265	265
solar	United States	Americas	Northern America	Dunns Bridge solar farm	2			435	pre-construction	2024		PV						NextEra Energy INC		41.1939	-86.9847	exact		Jasper County		Indiana	https://gem.wiki/Dunns_Bridge_solar_farm	L805182	G805973	US65339F1012	1	700	700	0	2064	2104	2144	0	0	0	0	435	435	435	435	435	435	435	435
solar	United States	Americas	Northern America	East Point Energy solar farm				50	shelved			PV						NextEra Energy INC		42.7569	-74.4928	approximate		Schoharie County		New York	https://gem.wiki/East_Point_Energy_solar_farm	L804627	G805342	US65339F1012	1	50	50	-99	40	80	120	0	0	0	0	0	0	0	0	0	0	0	0
solar	United States	Americas	Northern America	Echo River Solar				74	operating	2020		PV						NextEra Energy INC		30.2962	-82.8643	exact		Suwannee County		Florida	https://gem.wiki/Echo_River_Solar	L804628	G805343	US65339F1012	1	74		4	2060	2100	2140	74	74	74	74	74	74	74	74	74	74	74	74
solar	United States	Americas	Northern America	Egret Solar Center				74	operating	2020		PV						NextEra Energy INC		30.295	-82.186	exact		Baker County		Florida	https://gem.wiki/Egret_Solar_Center	L804629	G805344	US65339F1012	1	74	74	4	2060	2100	2140	74	74	74	74	74	74	74	74	74	74	74	74
solar	United States	Americas	Northern America	Elora Solar				150	operating	2022		PV						NextEra Energy INC		35.0601	-86.34	exact	Elora	Lincoln County		Tennessee	https://gem.wiki/Elora_Solar	L804630	G805345	US65339F1012	1	150	150	2	2062	2102	2142	0	0	150	150	150	150	150	150	150	150	150	150
solar	United States	Americas	Northern America	Eloy Valley Solar Project	1			200	pre-construction	2025		PV						NextEra Energy INC		32.7552	-111.554	approximate		Eloy County		Arizona	https://gem.wiki/Eloy_Valley_Solar_Project	L805365	G806195	US65339F1012	1	450		-1	2065	2105	2145	0	0	0	0	0	200	200	200	200	200	200	200
solar	United States	Americas	Northern America	Eloy Valley Solar Project	2			250	pre-construction	2025		PV						NextEra Energy		32.7283	-111.594	approximate		Pinal County		Arizona	https://gem.wiki/Eloy_Valley_Solar_Project	L805365	G838487	US65339F1012	1	450	450	-1	2065	2105	2145	0	0	0	0	0	250	250	250	250	250	250	250
solar	United States	Americas	Northern America	Esmeralda (NextEra) Solar Energy Center Project				500	pre-construction	2025		PV						NextEra Energy INC		37.8067	-117.642	approximate		Esmeralda County		Nevada	https://gem.wiki/Esmeralda_(NextEra)_Solar_Energy_Center_Project	L805183	G805975	US65339F1012	1	500	500	-1	2065	2105	2145	0	0	0	0	0	500	500	500	500	500	500	500
solar	United States	Americas	Northern America	Excelsior Energy solar farm				280	pre-construction			PV						NextEra Energy INC		43.0884	-75.257	approximate		Genesee County		New York	https://gem.wiki/Excelsior_Energy_solar_farm	L805184	G805976	US65339F1012	1	280	280	-99	40	80	120	0	0	0	0	0	0	0	0	0	280	280	280
solar	United States	Americas	Northern America	Farmington Solar				77	operating	2021		PV						NextEra Energy INC		44.6547	-70.1008	exact	Farmington	Franklin County		Maine	https://gem.wiki/Farmington_Solar	L804631	G805346	US65339F1012	1	77	77	3	2061	2101	2141	0	77	77	77	77	77	77	77	77	77	77	77
solar	United States	Americas	Northern America	Fish Springs Ranch solar farm	1			100	operating	2022		PV						NextEra Energy INC		40.0747	-119.974	exact	Reno	Washoe County		Nevada	https://gem.wiki/Fish_Springs_Ranch_solar_farm	L805186	G805978	US65339F1012	1	300		2	2062	2102	2142	0	0	100	100	100	100	100	100	100	100	100	100
solar	United States	Americas	Northern America	Fish Springs Ranch solar farm	2			200	pre-construction			PV						NextEra Energy INC		40.1041	-119.888	approximate		Washoe County		Nevada	https://gem.wiki/Fish_Springs_Ranch_solar_farm	L805186	G810648	US65339F1012	1	300	300	-99	40	80	120	0	0	0	0	0	0	0	0	0	200	200	200
solar	United States	Americas	Northern America	Fort Drum Energy Center solar farm				74	operating	2021		PV						NextEra Energy INC		27.616	-80.791	exact	Vero Beach	Okeechobee County		Florida	https://gem.wiki/Fort_Drum_Energy_Center_solar_farm	L804632	G805347	US65339F1012	1	74	74	3	2061	2101	2141	0	74	74	74	74	74	74	74	74	74	74	74
solar	United States	Americas	Northern America	Garnet Energy Solar			Cayuga Solar	200	pre-construction	2024		PV						NextEra Energy INC		43.1212	-76.648	approximate	Conquest			New York	https://gem.wiki/Garnet_Energy_Solar	L805187	G805979	US65339F1012	1	200	200	0	2064	2104	2144	0	0	0	0	200	200	200	200	200	200	200	200
solar	United States	Americas	Northern America	Genesis Solar Enegy Project	1			125	operating	2013		Solar Thermal						NextEra Energy INC		33.665	-114.998	exact		Riverside County		California	https://gem.wiki/Genesis_Solar_Enegy_Project	L808434	G810655	US65339F1012	1	250		11	2053	2093	2133	125	125	125	125	125	125	125	125	125	125	125	125
solar	United States	Americas	Northern America	Genesis Solar Enegy Project	2			125	operating	2014		Solar Thermal						NextEra Energy INC		33.665	-114.998	exact		Riverside County		California	https://gem.wiki/Genesis_Solar_Enegy_Project	L808434	G810656	US65339F1012	1	250	250	10	2054	2094	2134	125	125	125	125	125	125	125	125	125	125	125	125
solar	United States	Americas	Northern America	Grazing Yak Solar				35	operating	2019		PV						NextEra Energy INC		38.9778	-104.253	exact		El Paso County		Colorado	https://gem.wiki/Grazing_Yak_Solar	L804633	G805348	US65339F1012	1	35	35	5	2059	2099	2139	35	35	35	35	35	35	35	35	35	35	35	35
solar	United States	Americas	Northern America	Green River Solar				200	pre-construction	2025		PV						NextEra Energy INC		37.8771	-86.3072	approximate		Breckinridge County		Kentucky	https://gem.wiki/Green_River_Solar	L808439	G810661	US65339F1012	1	200	200	-1	2065	2105	2145	0	0	0	0	0	200	200	200	200	200	200	200
solar	United States	Americas	Northern America	Greensboro Solar Project				100	pre-construction			PV						NextEra Energy INC		39.9295	-85.3692	approximate		Henry County		Indiana	https://gem.wiki/Greensboro_Solar_Project	L805188	G805980	US65339F1012	1	100		-99	40	80	120	0	0	0	0	0	0	0	0	0	100	100	100
solar	United States	Americas	Northern America	Greenwood Solar			Culpepper Solar	100	pre-construction	2024		PV						NextEra Energy INC		38.4912	-77.9618	approximate		Culpeper County		Virginia	https://gem.wiki/Greenwood_Solar	L805372	G806202	US65339F1012	1	100	100	0	2064	2104	2144	0	0	0	0	100	100	100	100	100	100	100	100
solar	United States	Americas	Northern America	Hammock Solar				74	operating	2018		PV						NextEra Energy INC		26.6926	-81.325	exact		Hendry County		Florida	https://gem.wiki/Hammock_Solar	L804634	G805349	US65339F1012	1	74		6	2058	2098	2138	74	74	74	74	74	74	74	74	74	74	74	74
solar	United States	Americas	Northern America	Harmony (NextEra Energy) Solar	HFS		FMS Harmony Solar	74	operating	2020		PV						NextEra Energy INC		28.1553	-81.1083	exact		Osceola County		Florida	https://gem.wiki/Harmony_(NextEra_Energy)_Solar	L805189	G805981	US65339F1012	1	74		4	2060	2100	2140	74	74	74	74	74	74	74	74	74	74	74	74
solar	United States	Americas	Northern America	Hibiscus Solar Energy Center				74	operating	2020		PV						NextEra Energy INC		26.757	-80.334	exact		Palm Beach County		Florida	https://gem.wiki/Hibiscus_Solar_Energy_Center	L804635	G805350	US65339F1012	1	74	74	4	2060	2100	2140	74	74	74	74	74	74	74	74	74	74	74	74
solar	United States	Americas	Northern America	High River Energy solar farm				90	pre-construction	2024		PV						NextEra Energy INC		42.9019	-74.1327	approximate	Amsterdam	Montgomery County		New York	https://gem.wiki/High_River_Energy_solar_farm	L805190	G805982	US65339F1012	1	90	90	0	2064	2104	2144	0	0	0	0	90	90	90	90	90	90	90	90
solar	United States	Americas	Northern America	Horizon Solar Energy Center				74	operating	2018		PV						NextEra Energy INC		29.6656	-82.0583	exact		Putnam County		Florida	https://gem.wiki/Horizon_Solar_Energy_Center	L804636	G805351	US65339F1012	1	74		6	2058	2098	2138	74	74	74	74	74	74	74	74	74	74	74	74
solar	United States	Americas	Northern America	Indian River Solar Center				74	operating	2018		PV						NextEra Energy INC		27.5733	-80.5782	exact		Indian River County		Florida	https://gem.wiki/Indian_River_Solar_Center	L804637	G805352	US65339F1012	1	74	74	6	2058	2098	2138	74	74	74	74	74	74	74	74	74	74	74	74
solar	United States	Americas	Northern America	INEOS Hickerson solar farm				310	announced	2025		PV						NextEra Energy INC		31.9057	-97.6411	approximate		Bosque County		Texas	https://gem.wiki/INEOS_Hickerson_solar_farm	L832996	G838622	US65339F1012	1	310	310	-1	2065	2105	2145	0	0	0	0	0	310	310	310	310	310	310	310
solar	United States	Americas	Northern America	Interstate Solar Energy Center				74	operating	2019		PV						NextEra Energy INC		27.487	-80.443	exact		Saint Lucie County		Florida	https://gem.wiki/Interstate_Solar_Energy_Center	L804638	G805353	US65339F1012	1	74		5	2059	2099	2139	74	74	74	74	74	74	74	74	74	74	74	74
solar	United States	Americas	Northern America	Lakeside Solar Center				74	operating	2020		PV						NextEra Energy INC		27.2142	-80.7446	exact		Okeechobee County		Florida	https://gem.wiki/Lakeside_Solar_Center	L804639	G805354	US65339F1012	1	74	74	4	2060	2100	2140	74	74	74	74	74	74	74	74	74	74	74	74
solar	United States	Americas	Northern America	Live Oak Solar				51	operating	2016		PV						NextEra Energy INC		32.4238	-82.1028	exact		Candler County		Georgia	https://gem.wiki/Live_Oak_Solar	L805191	G805983	US65339F1012	1	51	51	8	2056	2096	2136	51	51	51	51	51	51	51	51	51	51	51	51
solar	United States	Americas	Northern America	Loggerhead Solar Energy Center				74	operating	2018		PV						NextEra Energy INC		27.2378	-80.5414	exact		Saint Lucie County		Florida	https://gem.wiki/Loggerhead_Solar_Energy_Center	L804640	G805355	US65339F1012	1	74		6	2058	2098	2138	74	74	74	74	74	74	74	74	74	74	74	74
solar	United States	Americas	Northern America	Magnolia Solar				74	operating	2021		PV						NextEra Energy INC		27.918	-82.05	exact	Mulberry	Polk County		Florida	https://gem.wiki/Magnolia_Solar	L804827	G805564	US65339F1012	1	74		3	2061	2101	2141	0	74	74	74	74	74	74	74	74	74	74	74
solar	United States	Americas	Northern America	Magnolia Springs Solar Center				74	operating	2021		PV						NextEra Energy INC		29.879	-81.696	exact	Green Cove Springs	Clay County		Florida	https://gem.wiki/Magnolia_Springs_Solar_Center	L804641	G805356	US65339F1012	1	74		3	2061	2101	2141	0	74	74	74	74	74	74	74	74	74	74	74
solar	United States	Americas	Northern America	Manatee Solar Energy Center				74	operating	2016		PV						NextEra Energy INC		27.6075	-82.3553	exact		Manatee County		Florida	https://gem.wiki/Manatee_Solar_Energy_Center	L804642	G805357	US65339F1012	1	74	74	8	2056	2096	2136	74	74	74	74	74	74	74	74	74	74	74	74
solar	United States	Americas	Northern America	Marshall Solar Energy Project				62	operating	2017		PV						NextEra Energy INC		44.4753	-95.669	exact		Lyon County		Minnesota	https://gem.wiki/Marshall_Solar_Energy_Project	L804643	G805358	US65339F1012	1	62	62	7	2057	2097	2137	62	62	62	62	62	62	62	62	62	62	62	62
solar	United States	Americas	Northern America	Mccoy Solar Energy Project Hybrid	4			31	operating	2015		PV						NextEra Energy INC		33.6947	-114.74	exact		Riverside County		California	https://gem.wiki/Mccoy_Solar_Energy_Project_Hybrid	L805193	G805987	US65339F1012	1	270		9	2055	2095	2135	31	31	31	31	31	31	31	31	31	31	31	31
solar	United States	Americas	Northern America	Mccoy Solar Energy Project Hybrid	5			31	operating	2015		PV						NextEra Energy INC		33.6947	-114.74	exact		Riverside County		California	https://gem.wiki/Mccoy_Solar_Energy_Project_Hybrid	L805193	G805986	US65339F1012	1	270		9	2055	2095	2135	31	31	31	31	31	31	31	31	31	31	31	31
solar	United States	Americas	Northern America	Mccoy Solar Energy Project Hybrid	6			27	operating	2015		PV						NextEra Energy INC		33.6947	-114.74	exact		Riverside County		California	https://gem.wiki/Mccoy_Solar_Energy_Project_Hybrid	L805193	G805985	US65339F1012	1	270		9	2055	2095	2135	27	27	27	27	27	27	27	27	27	27	27	27
solar	United States	Americas	Northern America	Mccoy Solar Energy Project Hybrid	8			36	operating	2015		PV						NextEra Energy INC		33.6947	-114.74	exact		Riverside County		California	https://gem.wiki/Mccoy_Solar_Energy_Project_Hybrid	L805193	G805988	US65339F1012	1	270		9	2055	2095	2135	36	36	36	36	36	36	36	36	36	36	36	36
solar	United States	Americas	Northern America	Mccoy Solar Energy Project Hybrid	1			42	operating	2016		PV						NextEra Energy INC		33.6947	-114.74	exact		Riverside County		California	https://gem.wiki/Mccoy_Solar_Energy_Project_Hybrid	L805193	G805992	US65339F1012	1	270		8	2056	2096	2136	42	42	42	42	42	42	42	42	42	42	42	42
solar	United States	Americas	Northern America	Mccoy Solar Energy Project Hybrid	2			21	operating	2016		PV						NextEra Energy INC		33.6947	-114.74	exact		Riverside County		California	https://gem.wiki/Mccoy_Solar_Energy_Project_Hybrid	L805193	G805989	US65339F1012	1	270		8	2056	2096	2136	21	21	21	21	21	21	21	21	21	21	21	21
solar	United States	Americas	Northern America	Mccoy Solar Energy Project Hybrid	3			40	operating	2016		PV						NextEra Energy INC		33.6947	-114.74	exact		Riverside County		California	https://gem.wiki/Mccoy_Solar_Energy_Project_Hybrid	L805193	G805990	US65339F1012	1	270		8	2056	2096	2136	40	40	40	40	40	40	40	40	40	40	40	40
solar	United States	Americas	Northern America	Mccoy Solar Energy Project Hybrid	7			42	operating	2016		PV						NextEra Energy INC		33.6947	-114.74	exact		Riverside County		California	https://gem.wiki/Mccoy_Solar_Energy_Project_Hybrid	L805193	G805991	US65339F1012	1	270	270	8	2056	2096	2136	42	42	42	42	42	42	42	42	42	42	42	42
solar	United States	Americas	Northern America	Miami Dade Solar Energy Center				74	operating	2019		PV						NextEra Energy INC		25.6401	-80.49	exact		Miami-Dade County		Florida	https://gem.wiki/Miami_Dade_Solar_Energy_Center	L804644	G805359	US65339F1012	1	74	74	5	2059	2099	2139	74	74	74	74	74	74	74	74	74	74	74	74
solar	United States	Americas	Northern America	Mountain View (NextEra) solar farm				20	operating	2014		PV						NextEra Energy INC		36.3906	-114.964	exact		Clark County		Nevada	https://gem.wiki/Mountain_View_(NextEra)_solar_farm	L804645	G805360	US65339F1012	1	20	20	10	2054	2094	2134	20	20	20	20	20	20	20	20	20	20	20	20
solar	United States	Americas	Northern America	Nassau Solar Center				74	operating	2020		PV						NextEra Energy INC		30.528	-81.895	exact		Nassau County		Florida	https://gem.wiki/Nassau_Solar_Center	L804646	G805361	US65339F1012	1	74	74	4	2060	2100	2140	74	74	74	74	74	74	74	74	74	74	74	74
solar	United States	Americas	Northern America	Neptune Energy Center Hybrid solar farm				325	construction	2023		PV						NextEra Energy INC		38.3303	-104.414	exact	Boone	Pueblo County		Colorado	https://gem.wiki/Neptune_Energy_Center_Hybrid_solar_farm	L804647	G805362	US65339F1012	1	325	325	1	2063	2103	2143	0	0	0	325	325	325	325	325	325	325	325	325
solar	United States	Americas	Northern America	Northern Preserve Solar				74	operating	2020		PV						NextEra Energy INC		30.232	-82.25	exact		Baker County		Florida	https://gem.wiki/Northern_Preserve_Solar	L804648	G805363	US65339F1012	1	74	74	4	2060	2100	2140	74	74	74	74	74	74	74	74	74	74	74	74
solar	United States	Americas	Northern America	Nutmeg Solar				19.6	operating	2020		PV						NextEra Energy INC		41.9748	-72.5108	exact	Enfield	Hartford		Connecticut	https://gem.wiki/Nutmeg_Solar	L808485	G810713	US65339F1012	1	19.6	19.6	4	2060	2100	2140	19.6	19.6	19.6	19.6	19.6	19.6	19.6	19.6	19.6	19.6	19.6	19.6
solar	United States	Americas	Northern America	Okeechobee Solar				74	operating	2020		PV						NextEra Energy INC		27.6304	-80.7948	exact		Okeechobee County		Florida	https://gem.wiki/Okeechobee_Solar	L804649	G805364	US65339F1012	1	74		4	2060	2100	2140	74	74	74	74	74	74	74	74	74	74	74	74
solar	United States	Americas	Northern America	Orange Blossom Solar Center				74	operating	2021		PV						NextEra Energy INC		27.5969	-80.5707	exact	Vero Beach	Indian River County		Florida	https://gem.wiki/Orange_Blossom_Solar_Center	L804650	G805365	US65339F1012	1	74		3	2061	2101	2141	0	74	74	74	74	74	74	74	74	74	74	74
solar	United States	Americas	Northern America	Palm Bay Solar				74	operating	2021		PV						NextEra Energy INC		27.857	-80.669	exact	Palm Bay	Brevard County		Florida	https://gem.wiki/Palm_Bay_Solar	L804651	G805366	US65339F1012	1	74		3	2061	2101	2141	0	74	74	74	74	74	74	74	74	74	74	74
solar	United States	Americas	Northern America	Pelican Solar Center				74	operating	2021		PV						NextEra Energy INC		27.543	-80.571	exact	Ft. Pierce	St Lucie County		Florida	https://gem.wiki/Pelican_Solar_Center	L804652	G805367	US65339F1012	1	74	74	3	2061	2101	2141	0	74	74	74	74	74	74	74	74	74	74	74
solar	United States	Americas	Northern America	Pinal Central Energy Center Hybrid solar farm				20	operating	2018		PV						NextEra Energy INC		32.8757	-111.551	exact		Pinal County		Arizona	https://gem.wiki/Pinal_Central_Energy_Center_Hybrid_solar_farm	L804653	G805368	US65339F1012	1	20	20	6	2058	2098	2138	20	20	20	20	20	20	20	20	20	20	20	20
solar	United States	Americas	Northern America	Pioneer Trail Solar Energy Center				74	operating	2019		PV						NextEra Energy INC		29.007	-81.098	exact		Volusia County		Florida	https://gem.wiki/Pioneer_Trail_Solar_Energy_Center	L804654	G805369	US65339F1012	1	74	74	5	2059	2099	2139	74	74	74	74	74	74	74	74	74	74	74	74
solar	United States	Americas	Northern America	Point Beach Solar				100	operating	2021		PV						NextEra Energy INC		44.2834	-87.5553	exact	Two Creeks	Manitowoc County		Wisconsin	https://gem.wiki/Point_Beach_Solar	L804655	G805370	US65339F1012	1	100	100	3	2061	2101	2141	0	100	100	100	100	100	100	100	100	100	100	100
solar	United States	Americas	Northern America	Proxmia Solar				190	pre-construction	2023		PV						NextEra Energy		37.4004	-121.163	approximate		Stanislaus County		California	https://gem.wiki/Proxmia_Solar	L833193	G838870	US65339F1012	1	190	190	1	2063	2103	2143	0	0	0	190	190	190	190	190	190	190	190	190
solar	United States	Americas	Northern America	Quinebaug Solar				49	operating	2021		PV						NextEra Energy INC		41.7499	-71.9325	exact	Canterbury	Windham County		Connecticut	https://gem.wiki/Quinebaug_Solar	L805195	G805994	US65339F1012	1	49	49	3	2061	2101	2141	0	49	49	49	49	49	49	49	49	49	49	49
solar	United States	Americas	Northern America	Quitman Solar	1			150	operating	2019		PV						NextEra Energy INC		30.849	-83.6433	exact		Brooks County		Georgia	https://gem.wiki/Quitman_Solar	L805196	G805995	US65339F1012	1	300		5	2059	2099	2139	150	150	150	150	150	150	150	150	150	150	150	150
solar	United States	Americas	Northern America	Quitman Solar	2			150	operating	2021		PV						NextEra Energy INC		30.862	-83.6517	exact	Quitman	Brooks County		Georgia	https://gem.wiki/Quitman_Solar	L805196	G806242	US65339F1012	1	300	300	3	2061	2101	2141	0	150	150	150	150	150	150	150	150	150	150	150
solar	United States	Americas	Northern America	Resurgence Solar	1&2			138	pre-construction	2023		PV						NextEra Energy INC		35.0066	-117.545	approximate	Boron	San Bernardino County		California	https://gem.wiki/Resurgence_Solar	L804656	G805371	US65339F1012	1	138	138	1	2063	2103	2143	0	0	0	138	138	138	138	138	138	138	138	138
solar	United States	Americas	Northern America	River Bend Solar				75	operating	2016		PV						NextEra Energy INC		34.8315	-87.8422	exact		Lauderdale County		Alabama	https://gem.wiki/River_Bend_Solar	L804657	G805372	US65339F1012	1	75	75	8	2056	2096	2136	75	75	75	75	75	75	75	75	75	75	75	75
solar	United States	Americas	Northern America	Rodeo Solar Center				74	operating	2021		PV						NextEra Energy INC		27.3206	-81.8102	exact	Arcadia	DeSoto County		Florida	https://gem.wiki/Rodeo_Solar_Center	L804658	G805373	US65339F1012	1	74	74	3	2061	2101	2141	0	74	74	74	74	74	74	74	74	74	74	74
solar	United States	Americas	Northern America	Roswell Solar				70	operating	2016		PV						NextEra Energy INC		33.4529	-104.461	exact	Roswell	Chaves County		New Mexico	https://gem.wiki/Roswell_Solar	L804659	G805374	US65339F1012	1	70	70	8	2056	2096	2136	70	70	70	70	70	70	70	70	70	70	70	70
solar	United States	Americas	Northern America	Route 66 Energy Center solar farm				50	operating	2022		PV						NextEra Energy INC		35.0984	-107.615	exact	San Fidel	Cibola County		New Mexico	https://gem.wiki/Route_66_Energy_Center_solar_farm	L805197	G805996	US65339F1012	1	50	50	2	2062	2102	2142	0	0	50	50	50	50	50	50	50	50	50	50
solar	United States	Americas	Northern America	Sabal Palm Solar Center				74	operating	2021		PV						NextEra Energy INC		26.7827	-80.3526	exact	Loxahatchee	Palm Beach County		Florida	https://gem.wiki/Sabal_Palm_Solar_Center	L804660	G805375	US65339F1012	1	74	74	3	2061	2101	2141	0	74	74	74	74	74	74	74	74	74	74	74
solar	United States	Americas	Northern America	Saint Solar				100	operating	2021		PV						NextEra Energy INC		32.8663	-111.502	exact	Coolidge	Pinal County		Arizona	https://gem.wiki/Saint_Solar	L804661	G805376	US65339F1012	1	100	100	3	2061	2101	2141	0	100	100	100	100	100	100	100	100	100	100	100
solar	United States	Americas	Northern America	Sanford Solar				49	operating	2020		PV						NextEra Energy INC		43.387	-70.711	exact	Sanford	York County		Maine	https://gem.wiki/Sanford_Solar	L805198	G805997	US65339F1012	1	49	49	4	2060	2100	2140	49	49	49	49	49	49	49	49	49	49	49	49
solar	United States	Americas	Northern America	Shafter Solar				20	operating	2015		PV						NextEra Energy INC		35.451	-119.128	exact	Bakersfield	Kern County		California	https://gem.wiki/Shafter_Solar	L804662	G805377	US65339F1012	1	20	20	9	2055	2095	2135	20	20	20	20	20	20	20	20	20	20	20	20
solar	United States	Americas	Northern America	Shaw Creek Solar				75	operating	2019		PV						NextEra Energy INC		33.6747	-81.7544	exact		Aiken County		South Carolina	https://gem.wiki/Shaw_Creek_Solar	L804663	G805378	US65339F1012	1	75	75	5	2059	2099	2139	75	75	75	75	75	75	75	75	75	75	75	75
solar	United States	Americas	Northern America	Silver State Solar Power South	1			26	operating	2015		PV						NextEra Energy INC		35.604	-115.341	exact		Clark County		Nevada	https://gem.wiki/Silver_State_Solar_Power_South	L805199	G805999	US65339F1012	1	260		9	2055	2095	2135	26	26	26	26	26	26	26	26	26	26	26	26
solar	United States	Americas	Northern America	Silver State Solar Power South	2			28	operating	2015		PV						NextEra Energy INC		35.604	-115.341	exact		Clark County		Nevada	https://gem.wiki/Silver_State_Solar_Power_South	L805199	G806000	US65339F1012	1	260		9	2055	2095	2135	28	28	28	28	28	28	28	28	28	28	28	28
solar	United States	Americas	Northern America	Silver State Solar Power South	3			37	operating	2015		PV						NextEra Energy INC		35.604	-115.341	exact		Clark County		Nevada	https://gem.wiki/Silver_State_Solar_Power_South	L805199	G806005	US65339F1012	1	260		9	2055	2095	2135	37	37	37	37	37	37	37	37	37	37	37	37
solar	United States	Americas	Northern America	Silver State Solar Power South	4			36	operating	2016		PV						NextEra Energy INC		35.604	-115.341	exact		Clark County		Nevada	https://gem.wiki/Silver_State_Solar_Power_South	L805199	G806003	US65339F1012	1	260		8	2056	2096	2136	36	36	36	36	36	36	36	36	36	36	36	36
solar	United States	Americas	Northern America	Silver State Solar Power South	5			35	operating	2016		PV						NextEra Energy INC		35.604	-115.341	exact		Clark County		Nevada	https://gem.wiki/Silver_State_Solar_Power_South	L805199	G806001	US65339F1012	1	260		8	2056	2096	2136	35	35	35	35	35	35	35	35	35	35	35	35
solar	United States	Americas	Northern America	Silver State Solar Power South	6			37	operating	2016		PV						NextEra Energy INC		35.604	-115.341	exact		Clark County		Nevada	https://gem.wiki/Silver_State_Solar_Power_South	L805199	G806004	US65339F1012	1	260		8	2056	2096	2136	37	37	37	37	37	37	37	37	37	37	37	37
solar	United States	Americas	Northern America	Silver State Solar Power South	7			35	operating	2016		PV						NextEra Energy INC		35.604	-115.341	exact		Clark County		Nevada	https://gem.wiki/Silver_State_Solar_Power_South	L805199	G806002	US65339F1012	1	260		8	2056	2096	2136	35	35	35	35	35	35	35	35	35	35	35	35
solar	United States	Americas	Northern America	Silver State Solar Power South	8			26	operating	2016		PV						NextEra Energy INC		35.604	-115.341	exact		Clark County		Nevada	https://gem.wiki/Silver_State_Solar_Power_South	L805199	G805998	US65339F1012	1	260	260	8	2056	2096	2136	26	26	26	26	26	26	26	26	26	26	26	26
solar	United States	Americas	Northern America	Skeleton Creek solar farm			Skeleton Creek Energy Center Hybrid	250	pre-construction	2025		PV						NextEra Energy INC		36.5214	-98.0344	approximate	Carrier	Garfield County		Oklahoma	https://gem.wiki/Skeleton_Creek_solar_farm	L805200	G806006	US65339F1012	1	250	250	-1	2065	2105	2145	0	0	0	0	0	250	250	250	250	250	250	250
solar	United States	Americas	Northern America	Solar Electric Generating Station	3			30	retired	1986	2021	Solar Thermal						NextEra Energy INC		35.0069	-117.556	exact		San Bernardino County		California	https://gem.wiki/Solar_Electric_Generating_Station	L808533	G810769	US65339F1012	1	310		38	2026	2066	2106	30	0	0	0	0	0	0	0	0	0	0	0
solar	United States	Americas	Northern America	Solar Electric Generating Station	4			30	retired	1986	2021	Solar Thermal						NextEra Energy INC		35.0122	-117.556	exact		San Bernardino County		California	https://gem.wiki/Solar_Electric_Generating_Station	L808533	G810770	US65339F1012	1	310		38	2026	2066	2106	30	0	0	0	0	0	0	0	0	0	0	0
solar	United States	Americas	Northern America	Solar Electric Generating Station	5			30	retired	1987	2021	Solar Thermal						NextEra Energy INC		35.0195	-117.555	exact		San Bernardino County		California	https://gem.wiki/Solar_Electric_Generating_Station	L808533	G810771	US65339F1012	1	310		37	2027	2067	2107	30	0	0	0	0	0	0	0	0	0	0	0
solar	United States	Americas	Northern America	Solar Electric Generating Station	6			30	retired	1988	2021	Solar Thermal						NextEra Energy INC		35.021	-117.566	exact		San Bernardino County		California	https://gem.wiki/Solar_Electric_Generating_Station	L808533	G810772	US65339F1012	1	310		36	2028	2068	2108	30	0	0	0	0	0	0	0	0	0	0	0
solar	United States	Americas	Northern America	Solar Electric Generating Station	7			30	retired	1988	2021	Solar Thermal						NextEra Energy INC		35.0148	-117.566	exact		San Bernardino County		California	https://gem.wiki/Solar_Electric_Generating_Station	L808533	G810773	US65339F1012	1	310		36	2028	2068	2108	30	0	0	0	0	0	0	0	0	0	0	0
solar	United States	Americas	Northern America	Solar Electric Generating Station	8			80	retired	1989	2021	Solar Thermal						NextEra Energy INC		35.0308	-117.356	exact		San Bernardino County		California	https://gem.wiki/Solar_Electric_Generating_Station	L808533	G810774	US65339F1012	1	310		35	2029	2069	2109	80	0	0	0	0	0	0	0	0	0	0	0
solar	United States	Americas	Northern America	Solar Electric Generating Station	9			80	operating	1990		Solar Thermal						NextEra Energy INC		35.033	-117.338	exact		San Bernardino County		California	https://gem.wiki/Solar_Electric_Generating_Station	L808533	G810775	US65339F1012	1	310	310	34	2030	2070	2110	80	80	80	80	80	80	80	80	80	80	80	80
solar	United States	Americas	Northern America	Sonoran Energy Center solar farm			Sonoran Solar	260	pre-construction	2023		PV						NextEra Energy INC		33.3703	-112.584	approximate	Buckeye			Arizona	https://gem.wiki/Sonoran_Energy_Center_solar_farm	L805201	G806007	US65339F1012	1	260	260	1	2063	2103	2143	0	0	0	260	260	260	260	260	260	260	260	260
solar	United States	Americas	Northern America	Southfork Solar				74	operating	2020		PV						NextEra Energy INC		27.5732	-82.1914	exact		Manatee County		Florida	https://gem.wiki/Southfork_Solar	L804664	G805379	US65339F1012	1	74	74	4	2060	2100	2140	74	74	74	74	74	74	74	74	74	74	74	74
solar	United States	Americas	Northern America	Storey Solar Energy			Storey Energy Center	88	pre-construction	2023		PV						NextEra Energy INC		32.8882	-111.498	approximate	Coolidge	Pinal County		Arizona	https://gem.wiki/Storey_Solar_Energy	L805202	G806008	US65339F1012	1	88	88	1	2063	2103	2143	0	0	0	88	88	88	88	88	88	88	88	88
solar	United States	Americas	Northern America	Stuttgart Solar				81	operating	2018		PV						NextEra Energy INC		34.4397	-91.44	exact		Arkansas County		Arkansas	https://gem.wiki/Stuttgart_Solar	L804461	G805128	US65339F1012	1	81	81	6	2058	2098	2138	81	81	81	81	81	81	81	81	81	81	81	81
solar	United States	Americas	Northern America	Sunshine Gateway Solar Energy Center				74	operating	2019		PV						NextEra Energy INC		30.28	-82.778	exact		Columbia County		Florida	https://gem.wiki/Sunshine_Gateway_Solar_Energy_Center	L804665	G805380	US65339F1012	1	74		5	2059	2099	2139	74	74	74	74	74	74	74	74	74	74	74	74
solar	United States	Americas	Northern America	Sweetbay Solar Center				74	operating	2020		PV						NextEra Energy INC		27.0601	-80.4745	exact		Martin County		Florida	https://gem.wiki/Sweetbay_Solar_Center	L804666	G805381	US65339F1012	1	74	74	4	2060	2100	2140	74	74	74	74	74	74	74	74	74	74	74	74
solar	United States	Americas	Northern America	Talladega Solar Project				80	pre-construction	2023		PV						NextEra Energy INC		33.3967	-86.1597	approximate		Talladega County		Alabama	https://gem.wiki/Talladega_Solar_Project	L805203	G806009	US65339F1012	1	80	80	1	2063	2103	2143	0	0	0	80	80	80	80	80	80	80	80	80
solar	United States	Americas	Northern America	Taylor Creek Solar			FMS Taylor Creek	74	operating	2020		PV						NextEra Energy INC		28.5035	-81.0483	exact		Orange County		Florida	https://gem.wiki/Taylor_Creek_Solar	L805204	G806010	US65339F1012	1	74	74	4	2060	2100	2140	74	74	74	74	74	74	74	74	74	74	74	74
solar	Spain	Europe	Southern Europe	Termosol 1 CSP solar farm				49.9	operating	2013		Solar Thermal						NextEra Energy; FPL Energy		39.192	-5.5864	exact		Miajadas	Badajoz	Extremadura	https://gem.wiki/Termosol_1_CSP_solar_farm	L824898	G828149	US65339F1012	0.5	49.9		11	2053	2093	2133	24.95	24.95	24.95	24.95	24.95	24.95	24.95	24.95	24.95	24.95	24.95	24.95
solar	Spain	Europe	Southern Europe	Termosol 2 CSP solar farm				49.9	operating	2013		Solar Thermal						NextEra Energy; FPL Energy		39.1748	-5.5979	exact		Miajadas	Cáceres	Extremadura	https://gem.wiki/Termosol_2_CSP_solar_farm	L824899	G828150	US65339F1012	0.5	49.9	49.9	11	2053	2093	2133	24.95	24.95	24.95	24.95	24.95	24.95	24.95	24.95	24.95	24.95	24.95	24.95
solar	United States	Americas	Northern America	Thunder Wolf Energy Center Hybrid solar farm				248	operating	2023		PV						NextEra Energy INC		38.1899	-104.398	exact	Avondale	Pueblo County		Colorado	https://gem.wiki/Thunder_Wolf_Energy_Center_Hybrid_solar_farm	L805205	G806011	US65339F1012	1	248	248	1	2063	2103	2143	0	0	0	248	248	248	248	248	248	248	248	248
solar	United States	Americas	Northern America	Titan (Colorado) solar farm				50	operating	2018		PV						NextEra Energy INC		39.6865	-104.014	exact		Arapahoe County		Colorado	https://gem.wiki/Titan_(Colorado)_solar_farm	L805206	G806012	US65339F1012	1	50	50	6	2058	2098	2138	50	50	50	50	50	50	50	50	50	50	50	50
solar	United States	Americas	Northern America	Titan (Texas) Solar Project			Titan Culberson	260	operating	2021		PV						NextEra Energy INC		31.7004	-104.458	exact	Van Horn	Culberson County		Texas	https://gem.wiki/Titan_(Texas)_Solar_Project	L805207	G806013	US65339F1012	1	260	260	3	2061	2101	2141	0	260	260	260	260	260	260	260	260	260	260	260
solar	United States	Americas	Northern America	Trailside Solar Center				74	operating	2020		PV						NextEra Energy INC		29.775	-81.4279	exact		Saint Johns County		Florida	https://gem.wiki/Trailside_Solar_Center	L804667	G805382	US65339F1012	1	74	74	4	2060	2100	2140	74	74	74	74	74	74	74	74	74	74	74	74
solar	United States	Americas	Northern America	Trelina Solar				80	pre-construction			PV						NextEra Energy INC		42.893	-76.948	approximate	Waterloo	Seneca County		New York	https://gem.wiki/Trelina_Solar	L805430	G806262	US65339F1012	1	80	80	-99	40	80	120	0	0	0	0	0	0	0	0	0	80	80	80
solar	United States	Americas	Northern America	Twin Lakes solar farm				74	operating	2020		PV						NextEra Energy INC		29.6122	-81.8445	exact		Putnam County		Florida	https://gem.wiki/Twin_Lakes_solar_farm	L804668	G805383	US65339F1012	1	74		4	2060	2100	2140	74	74	74	74	74	74	74	74	74	74	74	74
solar	United States	Americas	Northern America	Union Springs Solar Center				74	operating	2020		PV						NextEra Energy INC		30.001	-82.299	exact		Union County		Florida	https://gem.wiki/Union_Springs_Solar_Center	L804669	G805384	US65339F1012	1	74	74	4	2060	2100	2140	74	74	74	74	74	74	74	74	74	74	74	74
solar	United States	Americas	Northern America	Valley Farms Solar				200	pre-construction	2023		PV						NextEra Energy INC		32.8966	-111.756	approximate	Pinal			Arizona	https://gem.wiki/Valley_Farms_Solar	L805208	G806014	US65339F1012	1	200	200	1	2063	2103	2143	0	0	0	200	200	200	200	200	200	200	200	200
solar	United States	Americas	Northern America	Waco Solar				400	construction	2024		PV						NextEra Energy		31.7104	-96.8187	exact		Limestone County		Texas	https://gem.wiki/Waco_Solar	L833370	G839095	US65339F1012	1	400	400	0	2064	2104	2144	0	0	0	0	400	400	400	400	400	400	400	400
solar	United States	Americas	Northern America	Wadley Solar				260	construction	2024		PV						NextEra Energy INC		32.8666	-82.4041	approximate		Jefferson County		Georgia	https://gem.wiki/Wadley_Solar	L808546	G810790	US65339F1012	1	260	260	0	2064	2104	2144	0	0	0	0	260	260	260	260	260	260	260	260
solar	United States	Americas	Northern America	Wagon Trail Solar				500	pre-construction			PV						NextEra Energy INC		45.3609	-119.605	approximate		Morrow County		Oregon	https://gem.wiki/Wagon_Trail_Solar	L805209	G806015	US65339F1012	1	500	500	-99	40	80	120	0	0	0	0	0	0	0	0	0	500	500	500
solar	United States	Americas	Northern America	West Gardner Solar				320	pre-construction	2024		PV						NextEra Energy INC		38.81	-95.035	approximate		Johnson County		Kansas	https://gem.wiki/West_Gardner_Solar	L805210	G806016	US65339F1012	1	320	320	0	2064	2104	2144	0	0	0	0	320	320	320	320	320	320	320	320
solar	United States	Americas	Northern America	West Memphis Solar				180	announced	2024		PV						NextEra Energy INC		35.1569	-90.3105	approximate		Crittenden County		Arkansas	https://gem.wiki/West_Memphis_Solar	L808552	G810796	US65339F1012	1	180	180	0	2064	2104	2144	0	0	0	0	180	180	180	180	180	180	180	180
solar	United States	Americas	Northern America	Westside (NextEra) solar farm				20	operating	2017		PV						NextEra Energy INC		36.3818	-120.135	exact		Fresno County		California	https://gem.wiki/Westside_(NextEra)_solar_farm	L804670	G805385	US65339F1012	1	20	20	7	2057	2097	2137	20	20	20	20	20	20	20	20	20	20	20	20
solar	United States	Americas	Northern America	Wheatridge Hybrid solar farm			Wheatridge Renewable	50	operating	2022		PV						NextEra Energy INC		45.557	-119.612	exact	Morrow	Morrow County		Oregon	https://gem.wiki/Wheatridge_Hybrid_solar_farm	L804671	G805386	US65339F1012	1	50	50	2	2062	2102	2142	0	0	50	50	50	50	50	50	50	50	50	50
solar	United States	Americas	Northern America	White Oak Solar				76	operating	2016		PV						NextEra Energy INC		33.0368	-82.1113	exact		Burke County		Georgia	https://gem.wiki/White_Oak_Solar	L805211	G806017	US65339F1012	1	76	76	8	2056	2096	2136	76	76	76	76	76	76	76	76	76	76	76	76
solar	United States	Americas	Northern America	White Pine Solar				101	operating	2016		PV						NextEra Energy INC		32.506	-84.257	exact		Taylor County		Georgia	https://gem.wiki/White_Pine_Solar	L804672	G805387	US65339F1012	1	101	101	8	2056	2096	2136	101	101	101	101	101	101	101	101	101	101	101	101
solar	United States	Americas	Northern America	Whitney Point Solar				20	operating	2017		PV						NextEra Energy INC		36.3769	-120.138	exact		Fresno County		California	https://gem.wiki/Whitney_Point_Solar	L804673	G805388	US65339F1012	1	20	20	7	2057	2097	2137	20	20	20	20	20	20	20	20	20	20	20	20
solar	United States	Americas	Northern America	Wildflower Solar Energy Center				74	operating	2018		PV						NextEra Energy INC		27.3162	-81.7839	exact		DeSoto County		Florida	https://gem.wiki/Wildflower_Solar_Energy_Center	L804674	G805389	US65339F1012	1	74		6	2058	2098	2138	74	74	74	74	74	74	74	74	74	74	74	74
solar	United States	Americas	Northern America	Willow Solar Energy Center				74	operating	2021		PV						NextEra Energy INC		27.4481	-82.0807	exact	Myakka City	Manatee County		Florida	https://gem.wiki/Willow_Solar_Energy_Center	L804675	G805390	US65339F1012	1	74	74	3	2061	2101	2141	0	74	74	74	74	74	74	74	74	74	74	74
solar	United States	Americas	Northern America	Wilmot Energy Center solar farm			Wilmot West Grant	130	operating	2021		PV						NextEra Energy INC		32.0435	-110.893	exact	Tucson	Pima County		Arizona	https://gem.wiki/Wilmot_Energy_Center_solar_farm	L804676	G805391	US65339F1012	1	130	130	3	2061	2101	2141	0	130	130	130	130	130	130	130	130	130	130	130
solar	United States	Americas	Northern America	Yellow Pine Solar Project	1			125	operating	2023		PV						NextEra Energy INC		36.0661	-115.775	exact		Clarke County		Nevada	https://gem.wiki/Yellow_Pine_Solar_Project	L805435	G806267	US65339F1012	1	125	125	1	2063	2103	2143	0	0	0	125	125	125	125	125	125	125	125	125
solar	United States	Americas	Northern America	Yum Yum Solar				147	construction	2024		PV						Invenergy; NextEra Energy		35.2525	-89.2514	exact	Yum Yum	Fayette County		Tennessee	https://gem.wiki/Yum_Yum_Solar	L804561	G805246	US65339F1012	0.5	147	147	0	2064	2104	2144	0	0	0	0	147	147	147	147	147	147	147	147
wind	Canada	Americas	Northern America	Adelaide Wind Energy Centre			Adelaide Nextera wind farm	60	operating	2014		onshore						NextEra Energy INC		43.0203	-81.7131	exact	Adelaide Metcalfe	Middlesex County	Southwestern Ontario	Ontario	https://gem.wiki/Adelaide_Wind_Energy_Centre	L906735	G909071	US65339F1012	1	60	60	10	2054	2094	2134	60	60	60	60	60	60	60	60	60	60	60	60
wind	United States	Americas	Northern America	Appaloosa Run Wind	1			172	operating	2022		onshore						NextEra Energy INC		31.1599	-101.873	exact		Upton County		Texas	https://gem.wiki/Appaloosa_Run_Wind	L907142	G909622	US65339F1012	1	172	172	2	2062	2102	2142	0	0	172	172	172	172	172	172	172	172	172	172
wind	United States	Americas	Northern America	Ashtabula Wind Center	1		FPL Energy Ashtabula Wind	196	operating	2008		onshore						NextEra Energy INC		47.0695	-97.8848	exact		Barnes County		North Dakota	https://gem.wiki/Ashtabula_Wind_Center	L906762	G909871	US65339F1012	1	196	196	16	2048	2088	2128	196	196	196	196	196	196	196	196	196	196	196	196
wind	United States	Americas	Northern America	Babbitt Ranch Wind Project	1			161	construction	2024		onshore						NextEra Energy INC		35.6277	-111.868	exact		Coconino County		Arizona	https://gem.wiki/Babbitt_Ranch_Wind_Project	L907263	G909785	US65339F1012	1	161	161	0	2064	2104	2144	0	0	0	0	161	161	161	161	161	161	161	161
wind	United States	Americas	Northern America	Baldwin Wind Energy Center	RP			102	operating	2020		onshore						NextEra Energy INC		47.0783	-100.657	exact					https://gem.wiki/Baldwin_Wind_Energy_Center	L907045	G927235	US65339F1012	1	102	102	4	2060	2100	2140	102	102	102	102	102	102	102	102	102	102	102	102
wind	United States	Americas	Northern America	Blackwell wind farm	1		Cowboy Wind Farm, Nextera-Blackwell	60	operating	2012		onshore						NextEra Energy INC		36.8646	-97.4251	exact		Kay County		Oklahoma	https://gem.wiki/Blackwell_wind_farm	L906732	G909068	US65339F1012	1	60	60	12	2052	2092	2132	60	60	60	60	60	60	60	60	60	60	60	60
wind	United States	Americas	Northern America	Blue Summit wind farm	1			135	operating	2012		onshore						NextEra Energy INC		34.3486	-99.3892	exact		Wilbarger County		Texas	https://gem.wiki/Blue_Summit_wind_farm	L906972	G909627	US65339F1012	1	434		12	2052	2092	2132	135	135	135	135	135	135	135	135	135	135	135	135
wind	United States	Americas	Northern America	Blue Summit wind farm	2			99	operating	2018		onshore						NextEra Energy INC		34.2054	-99.4781	exact		Hardeman County		Texas	https://gem.wiki/Blue_Summit_wind_farm	L906972	G909386	US65339F1012	1	434		6	2058	2098	2138	99	99	99	99	99	99	99	99	99	99	99	99
wind	United States	Americas	Northern America	Blue Summit wind farm	3			200	operating	2019		onshore						NextEra Energy INC		34.1569	-99.5354	exact		Hardeman County		Texas	https://gem.wiki/Blue_Summit_wind_farm	L906972	G909977	US65339F1012	1	434	434	5	2059	2099	2139	200	200	200	200	200	200	200	200	200	200	200	200
wind	United States	Americas	Northern America	Bluff Point Wind Facility	1			120	operating	2017		onshore						NextEra Energy INC		40.3029	-84.9315	exact		Randolph County		Indiana	https://gem.wiki/Bluff_Point_Wind_Facility	L907093	G909550	US65339F1012	1	120	120	7	2057	2097	2137	120	120	120	120	120	120	120	120	120	120	120	120
wind	United States	Americas	Northern America	Borderlands wind farm	1			100	operating	2021		onshore						NextEra Energy INC		34.1031	-108.908	exact		Catron County		New Mexico	https://gem.wiki/Borderlands_wind_farm	L906976	G909390	US65339F1012	1	100	100	3	2061	2101	2141	0	100	100	100	100	100	100	100	100	100	100	100
wind	Canada	Americas	Northern America	Bornish Wind Energy Centre				73	operating	2014		onshore						NextEra Energy INC		43.138	-81.7381	exact	North Middlesex	Middlesex County	Southwestern Ontario	Ontario	https://gem.wiki/Bornish_Wind_Energy_Centre	L906813	G909171	US65339F1012	1	73	73	10	2054	2094	2134	73	73	73	73	73	73	73	73	73	73	73	73
wind	United States	Americas	Northern America	Brady wind farm	1			150	operating	2016		onshore						NextEra Energy INC		46.6851	-102.636	exact		Stark County		North Dakota	https://gem.wiki/Brady_wind_farm	L907181	G909691	US65339F1012	1	299		8	2056	2096	2136	150	150	150	150	150	150	150	150	150	150	150	150
wind	United States	Americas	Northern America	Brady wind farm	2			149	operating	2016		onshore						NextEra Energy INC		46.6272	-102.839	exact		Hettinger County		North Dakota	https://gem.wiki/Brady_wind_farm	L907181	G909679	US65339F1012	1	299	299	8	2056	2096	2136	149	149	149	149	149	149	149	149	149	149	149	149
wind	United States	Americas	Northern America	Breckinridge wind farm	1			98	operating	2015		onshore						NextEra Energy INC		36.4496	-97.6273	exact		Garfield County		Oklahoma	https://gem.wiki/Breckinridge_wind_farm	L906934	G909334	US65339F1012	1	98	98	9	2055	2095	2135	98	98	98	98	98	98	98	98	98	98	98	98
wind	United States	Americas	Northern America	Bronco Plains wind farm	1			299	operating	2020		onshore						NextEra Energy INC		39.0463	-102.944	exact		Kit Carson County		Colorado	https://gem.wiki/Bronco_Plains_wind_farm	L907561	G910197	US65339F1012	1	499		4	2060	2100	2140	299	299	299	299	299	299	299	299	299	299	299	299
wind	United States	Americas	Northern America	Bronco Plains wind farm	2			200	announced			onshore						NextEra Energy INC		39.184	-102.97	approximate					https://gem.wiki/Bronco_Plains_wind_farm	L907561	G927240	US65339F1012	1	499	499	-99	40	80	120	0	0	0	0	0	0	0	0	0	200	200	200
wind	United States	Americas	Northern America	Brookfield Tehachapi wind farm	1		Coram Wind	102	operating	2012		onshore						NextEra Energy INC		35.0644	-118.335	exact		Kern County		California	https://gem.wiki/Brookfield_Tehachapi_wind_farm	L906439	G909464	US65339F1012	1	102	102	12	2052	2092	2132	102	102	102	102	102	102	102	102	102	102	102	102
wind	United States	Americas	Northern America	Buffalo Ridge Windplant WPP 1993	RP1			109	operating	2022		onshore						NextEra Energy INC		44.2169	-96.2454	exact		Lincoln County		Minnesota	https://gem.wiki/Buffalo_Ridge_Windplant_WPP_1993	L906456	G909515	US65339F1012	1	109	109	2	2062	2102	2142	0	0	109	109	109	109	109	109	109	109	109	109
wind	United States	Americas	Northern America	Butler Ridge wind farm	1			54	operating	2009		onshore						NextEra Energy INC		43.4023	-88.4777	exact		Dodge County		Wisconsin	https://gem.wiki/Butler_Ridge_wind_farm	L906713	G909041	US65339F1012	1	54	54	15	2049	2089	2129	54	54	54	54	54	54	54	54	54	54	54	54
wind	United States	Americas	Northern America	Cabazon wind farm	2		Cabazon Wind Partners	41	operating	2002		onshore						NextEra Energy INC		33.9166	-116.729	exact		Riverside County		California	https://gem.wiki/Cabazon_wind_farm	L906602	G908926	US65339F1012	1	41	41	22	2042	2082	2122	41	41	41	41	41	41	41	41	41	41	41	41
wind	United States	Americas	Northern America	Callahan Divide wind farm	RP			114	operating	2017		onshore						NextEra Energy INC		32.3075	-100.029	exact					https://gem.wiki/Callahan_Divide_wind_farm	L907082	G927243	US65339F1012	1	114	114	7	2057	2097	2137	114	114	114	114	114	114	114	114	114	114	114	114
wind	United States	Americas	Northern America	Capricorn Ridge Wind Energy Center	RP1			362	operating	2017		onshore						NextEra Energy		31.8627	-100.927	exact					https://gem.wiki/Capricorn_Ridge_Wind_Energy_Center	L907079	G927244	US65339F1012	1	660		7	2057	2097	2137	362	362	362	362	362	362	362	362	362	362	362	362
wind	United States	Americas	Northern America	Capricorn Ridge Wind Energy Center	RP2			298	operating	2017		onshore						NextEra Energy		31.9281	-100.964	exact					https://gem.wiki/Capricorn_Ridge_Wind_Energy_Center	L907079	G927245	US65339F1012	1	660	660	7	2057	2097	2137	298	298	298	298	298	298	298	298	298	298	298	298
wind	United States	Americas	Northern America	Carousel wind farm	1			150	operating	2015		onshore						NextEra Energy INC		39.3384	-102.15	exact		Kit Carson County		Colorado	https://gem.wiki/Carousel_wind_farm	L907189	G909689	US65339F1012	1	150	150	9	2055	2095	2135	150	150	150	150	150	150	150	150	150	150	150	150
wind	United States	Americas	Northern America	Casa Mesa wind farm	1			51	operating	2018		onshore						NextEra Energy INC		34.6308	-103.976	exact		Quay County		New Mexico	https://gem.wiki/Casa_Mesa_wind_farm	L906702	G909025	US65339F1012	1	51	51	6	2058	2098	2138	51	51	51	51	51	51	51	51	51	51	51	51
wind	Canada	Americas	Northern America	Cedar Point 2 wind farm			Cedar Point Lambton wind farm	100	operating	2015		onshore						NextEra Energy INC		43.1682	-81.9434	exact	Lambton Shores	Lambton County	Southwestern Ontario	Ontario	https://gem.wiki/Cedar_Point_2_wind_farm	L906977	G909391	US65339F1012	1	100	100	9	2055	2095	2135	100	100	100	100	100	100	100	100	100	100	100	100
wind	United States	Americas	Northern America	Cedar Springs wind farm	1			199	operating	2020		onshore						NextEra Energy INC		43.1283	-105.462	exact		Converse County		Wyoming	https://gem.wiki/Cedar_Springs_wind_farm	L907140	G909892	US65339F1012	1	332		4	2060	2100	2140	199	199	199	199	199	199	199	199	199	199	199	199
wind	United States	Americas	Northern America	Cedar Springs wind farm	3			133	operating	2020		onshore						NextEra Energy INC		43.0693	-105.57	exact		Converse County		Wyoming	https://gem.wiki/Cedar_Springs_wind_farm	L907140	G909620	US65339F1012	1	332	332	4	2060	2100	2140	133	133	133	133	133	133	133	133	133	133	133	133
wind	United States	Americas	Northern America	Cerro Gordo wind farm	RP1		Hawkeye Power, Clear Lake	42	operating	2020		onshore						NextEra Energy INC		43.0548	-93.4482	exact		Cerro Gordo County		Iowa	https://gem.wiki/Cerro_Gordo_wind_farm	L906624	G908934	US65339F1012	1	42	42	4	2060	2100	2140	42	42	42	42	42	42	42	42	42	42	42	42
wind	United States	Americas	Northern America	Cimarron I wind farm	1			166	operating	2012		onshore						NextEra Energy INC		37.8641	-100.235	exact		Gray County		Kansas	https://gem.wiki/Cimarron_I_wind_farm	L907277	G909804	US65339F1012	1	166	166	12	2052	2092	2132	166	166	166	166	166	166	166	166	166	166	166	166
wind	United States	Americas	Northern America	Clearwater wind farm	1			365	operating	2022		onshore						NextEra Energy INC; Portland General Electric (PGE)		46.8142	-106.349	exact	Rock Springs	Rosebud County		Montana	https://gem.wiki/Clearwater_wind_farm	L907682	G910340	US65339F1012	0.5	676		2	2062	2102	2142	0	0	182.5	182.5	182.5	182.5	182.5	182.5	182.5	182.5	182.5	182.5
wind	United States	Americas	Northern America	Clearwater wind farm	2			103	pre-construction	2023		onshore						NextEra Energy INC; Portland General Electric (PGE)		46.8188	-106.195	approximate					https://gem.wiki/Clearwater_wind_farm	L907682	G927253	US65339F1012	0.5	676		1	2063	2103	2143	0	0	0	51.5	51.5	51.5	51.5	51.5	51.5	51.5	51.5	51.5
wind	United States	Americas	Northern America	Clearwater wind farm	3			208	pre-construction	2023		onshore						NextEra Energy INC; Portland General Electric (PGE)		46.7896	-106.002	approximate					https://gem.wiki/Clearwater_wind_farm	L907682	G927254	US65339F1012	0.5	676	676	1	2063	2103	2143	0	0	0	104	104	104	104	104	104	104	104	104
wind	United States	Americas	Northern America	Cottonwood wind farm	1			90	operating	2017		onshore						NextEra Energy INC		40.2723	-98.3745	exact		Webster County		Nebraska	https://gem.wiki/Cottonwood_wind_farm	L906906	G909299	US65339F1012	1	90	90	7	2057	2097	2137	90	90	90	90	90	90	90	90	90	90	90	90
wind	United States	Americas	Northern America	Crowned Ridge Wind Project	1			200	operating	2019		onshore						NextEra Energy INC		45.0816	-97.0107	exact		Codington County		South Dakota	https://gem.wiki/Crowned_Ridge_Wind_Project	L907404	G909971	US65339F1012	1	200	200	5	2059	2099	2139	200	200	200	200	200	200	200	200	200	200	200	200
wind	United States	Americas	Northern America	Crystal Lake wind farm	RP1			162	operating	2020		onshore						NextEra Energy INC		43.2071	-93.8631	exact		Hancock County		Iowa	https://gem.wiki/Crystal_Lake_wind_farm	L906778	G909793	US65339F1012	1	162	162	4	2060	2100	2140	162	162	162	162	162	162	162	162	162	162	162	162
wind	United States	Americas	Northern America	Day County Wind Project	RP			106	operating	2020		onshore						NextEra Energy INC		45.2743	-97.917	exact					https://gem.wiki/Day_County_Wind_Project	L906952	G927263	US65339F1012	1	106	106	4	2060	2100	2140	106	106	106	106	106	106	106	106	106	106	106	106
wind	United States	Americas	Northern America	Dodge County wind farm	1			260	announced	2024		onshore						NextEra Energy INC		44.0056	-92.9504	exact		Dodge County		Minnesota	https://gem.wiki/Dodge_County_wind_farm	L907285	G909818	US65339F1012	1	260	260	0	2064	2104	2144	0	0	0	0	260	260	260	260	260	260	260	260
wind	Canada	Americas	Northern America	East Durham wind farm				22	operating	2015		onshore						NextEra Energy INC		44.1894	-80.6416	exact	West Grey	Grey County	Southwestern Ontario	Ontario	https://gem.wiki/East_Durham_wind_farm	L906461	G908741	US65339F1012	1	22	22	9	2055	2095	2135	22	22	22	22	22	22	22	22	22	22	22	22
wind	United States	Americas	Northern America	Edmondson Ranch Wind Project	1		Lacy Creek Wind Energy Center	301	operating	2022		onshore						NextEra Energy INC		31.7373	-101.263	exact	Sterling City	Glasscock County		Texas	https://gem.wiki/Edmondson_Ranch_Wind_Project	L907546	G910180	US65339F1012	1	301	301	2	2062	2102	2142	0	0	301	301	301	301	301	301	301	301	301	301
wind	United States	Americas	Northern America	Eight Point wind farm	1			102	operating	2023		onshore						NextEra Energy INC		42.1016	-77.7011	exact	Greenwood	Steuben County		New York	https://gem.wiki/Eight_Point_wind_farm	L907036	G909460	US65339F1012	1	102	102	1	2063	2103	2143	0	0	0	102	102	102	102	102	102	102	102	102
wind	United States	Americas	Northern America	Elk City wind farm	1			99	operating	2009		onshore						NextEra Energy INC		35.4755	-99.8888	exact		Roger Mills County		Oklahoma	https://gem.wiki/Elk_City_wind_farm	L906939	G909339	US65339F1012	1	200		15	2049	2089	2129	99	99	99	99	99	99	99	99	99	99	99	99
wind	United States	Americas	Northern America	Elk City wind farm	2			101	operating	2010		onshore						NextEra Energy INC		35.4985	-99.6587	exact		Roger Mills County		Oklahoma	https://gem.wiki/Elk_City_wind_farm	L906939	G909451	US65339F1012	1	200	200	14	2050	2090	2130	101	101	101	101	101	101	101	101	101	101	101	101
wind	United States	Americas	Northern America	Emmons Logan wind farm	1			216	operating	2019		onshore						NextEra Energy INC		46.4019	-99.9074	exact		Logan County		North Dakota	https://gem.wiki/Emmons_Logan_wind_farm	L907455	G910057	US65339F1012	1	216	216	5	2059	2099	2139	216	216	216	216	216	216	216	216	216	216	216	216
wind	United States	Americas	Northern America	Endeavor wind farm	RP			150	operating	2019		onshore						NextEra Energy INC		43.3891	-95.4025	exact		Osceola County		Iowa	https://gem.wiki/Endeavor_wind_farm	L906676	G927268	US65339F1012	1	150	150	5	2059	2099	2139	150	150	150	150	150	150	150	150	150	150	150	150
wind	United States	Americas	Northern America	Enron Earth Smart wind farm	1		Green Power I, Green Power Enron, Helzel & Schwarzhoff 88	16	operating	1999		onshore						NextEra Energy INC		33.9167	-116.56	exact	Palm Springs	Riverside County		California	https://gem.wiki/Enron_Earth_Smart_wind_farm	L906367	G908637	US65339F1012	1	16	16	25	2039	2079	2119	16	16	16	16	16	16	16	16	16	16	16	16
wind	United States	Americas	Northern America	Ensign wind farm	1			99	operating	2012		onshore						NextEra Energy INC		37.6145	-100.285	exact		Gray County		Kansas	https://gem.wiki/Ensign_wind_farm	L906940	G909340	US65339F1012	1	99	99	12	2052	2092	2132	99	99	99	99	99	99	99	99	99	99	99	99
wind	United States	Americas	Northern America	Gage Wind Project	1			124	shelved			onshore						NextEra Energy INC		40.4197	-96.663	approximate	Pickrell	Gage County		Nebraska	https://gem.wiki/Gage_Wind_Project	L907117	G909583	US65339F1012	1	124	124	-99	40	80	120	0	0	0	0	0	0	0	0	0	0	0	0
wind	Canada	Americas	Northern America	Ghost Pine wind farm				82	operating	2010		onshore						NextEra Energy INC		51.9344	-113.433	exact		Kneehill County		Alberta	https://gem.wiki/Ghost_Pine_wind_farm	L906892	G909282	US65339F1012	1	82	82	14	2050	2090	2130	82	82	82	82	82	82	82	82	82	82	82	82
wind	United States	Americas	Northern America	Golden Hills (California) wind farm	1			86	operating	2015		onshore						NextEra Energy INC		37.7187	-121.649	exact		Alameda County		California	https://gem.wiki/Golden_Hills_(California)_wind_farm	L921940	G927281	US65339F1012	1	132		9	2055	2095	2135	86	86	86	86	86	86	86	86	86	86	86	86
wind	United States	Americas	Northern America	Golden Hills (California) wind farm	2		Golden Hills II	46	operating	2017		onshore						NextEra Energy INC		37.7464	-121.616	exact		Alameda County		California	https://gem.wiki/Golden_Hills_(California)_wind_farm	L921940	G927282	US65339F1012	1	132	132	7	2057	2097	2137	46	46	46	46	46	46	46	46	46	46	46	46
wind	United States	Americas	Northern America	Golden West wind farm	1			249	operating	2015		onshore						NextEra Energy INC		38.9244	-104.224	exact		El Paso County		Colorado	https://gem.wiki/Golden_West_wind_farm	L907496	G910121	US65339F1012	1	249	249	9	2055	2095	2135	249	249	249	249	249	249	249	249	249	249	249	249
wind	Canada	Americas	Northern America	Goshen wind farm			Goshen Huron wind farm	102	operating	2015		onshore						NextEra Energy INC		43.4029	-81.611	exact	Bluewater	Huron County	Southwestern Ontario	Ontario	https://gem.wiki/Goshen_wind_farm	L907039	G909465	US65339F1012	1	102	102	9	2055	2095	2135	102	102	102	102	102	102	102	102	102	102	102	102
wind	United States	Americas	Northern America	Granite Reliable Power wind farm	1			99	operating	2012		onshore						NextEra Energy INC		44.7532	-71.2987	exact		Coos County		New Hampshire	https://gem.wiki/Granite_Reliable_Power_wind_farm	L906959	G909368	US65339F1012	1	99	99	12	2052	2092	2132	99	99	99	99	99	99	99	99	99	99	99	99
wind	United States	Americas	Northern America	Grant Park wind farm	1			200	shelved			onshore						NextEra Energy INC		41.2454	-87.6425	approximate	Grant Park	Kankakee County		Illinois	https://gem.wiki/Grant_Park_wind_farm	L907370	G909928	US65339F1012	1	200	200	-99	40	80	120	0	0	0	0	0	0	0	0	0	0	0	0
wind	United States	Americas	Northern America	Gray County wind farm	Montezuma			112	operating	2001		onshore						NextEra Energy INC		37.6133	-100.355	exact		Gray County		Kansas	https://gem.wiki/Gray_County_wind_farm	L907077	G909529	US65339F1012	1	112	112	23	2041	2081	2121	112	112	112	112	112	112	112	112	112	112	112	112
wind	United States	Americas	Northern America	Great Prairie wind farm	1		Firewheel Wind Project	358	operating	2022		onshore						NextEra Energy INC		36.2972	-101.529	exact		Hansford County		Texas	https://gem.wiki/Great_Prairie_wind_farm	L907445	G910270	US65339F1012	1	867		2	2062	2102	2142	0	0	358	358	358	358	358	358	358	358	358	358
wind	United States	Americas	Northern America	Great Prairie wind farm	2		Firewheel Wind Project	210	operating	2022		onshore						NextEra Energy INC		36.3701	-101.555	exact		Hansford County		Texas	https://gem.wiki/Great_Prairie_wind_farm	L907445	G910038	US65339F1012	1	867		2	2062	2102	2142	0	0	210	210	210	210	210	210	210	210	210	210
wind	United States	Americas	Northern America	Great Prairie wind farm	3		Firewheel Wind Project	299	operating	2022		onshore						NextEra Energy INC		36.4566	-101.472	exact		Hansford County		Texas	https://gem.wiki/Great_Prairie_wind_farm	L907445	G910191	US65339F1012	1	867	867	2	2062	2102	2142	0	0	299	299	299	299	299	299	299	299	299	299
wind	United States	Americas	Northern America	Hancock County wind farm	1			98	operating	2002		onshore						NextEra Energy INC		42.9422	-93.664	exact		Carbon County		Wyoming	https://gem.wiki/Hancock_County_wind_farm	L906931	G909331	US65339F1012	1	98	98	22	2042	2082	2122	98	98	98	98	98	98	98	98	98	98	98	98
wind	United States	Americas	Northern America	Heartland Divide wind farm	1			104	operating	2018		onshore						NextEra Energy INC		41.7588	-94.7951	exact		Audubon County		Iowa	https://gem.wiki/Heartland_Divide_wind_farm	L907052	G909482	US65339F1012	1	304		6	2058	2098	2138	104	104	104	104	104	104	104	104	104	104	104	104
wind	United States	Americas	Northern America	Heartland Divide wind farm	2			200	operating	2022		onshore						NextEra Energy INC		41.7588	-94.7951	exact		Audubon County		Iowa	https://gem.wiki/Heartland_Divide_wind_farm	L907052	G909932	US65339F1012	1	304	304	2	2062	2102	2142	0	0	200	200	200	200	200	200	200	200	200	200
wind	United States	Americas	Northern America	High Banks Wind	1			643	construction			onshore						NextEra Energy INC		39.816	-97.431	exact					https://gem.wiki/High_Banks_Wind	L921945	G927288	US65339F1012	1	643	643	-99	40	80	120	0	0	0	0	0	0	0	643	643	643	643	643
wind	United States	Americas	Northern America	High Lonesome Mesa wind farm	RP			99	operating	2019		onshore						NextEra Energy INC		34.489	-105.969	exact					https://gem.wiki/High_Lonesome_Mesa_wind_farm	L906986	G927289	US65339F1012	1	99	99	5	2059	2099	2139	99	99	99	99	99	99	99	99	99	99	99	99
wind	United States	Americas	Northern America	Horse Hollow Wind Energy Center	RP1			210	operating	2017		onshore						NextEra Energy		32.243	-100.026	exact					https://gem.wiki/Horse_Hollow_Wind_Energy_Center	L907446	G927291	US65339F1012	1	733		7	2057	2097	2137	210	210	210	210	210	210	210	210	210	210	210	210
wind	United States	Americas	Northern America	Horse Hollow Wind Energy Center	RP2			299	operating	2017		onshore						NextEra Energy		32.2526	-100.148	exact					https://gem.wiki/Horse_Hollow_Wind_Energy_Center	L907446	G927292	US65339F1012	1	733		7	2057	2097	2137	299	299	299	299	299	299	299	299	299	299	299	299
wind	United States	Americas	Northern America	Horse Hollow Wind Energy Center	RP3			224	operating	2017		onshore						NextEra Energy		32.2626	-100.294	exact					https://gem.wiki/Horse_Hollow_Wind_Energy_Center	L907446	G927293	US65339F1012	1	733	733	7	2057	2097	2137	224	224	224	224	224	224	224	224	224	224	224	224
wind	United States	Americas	Northern America	Indian Mesa wind farm	RP			82	operating	2018		onshore						NextEra Energy INC		30.9515	-102.164	exact					https://gem.wiki/Indian_Mesa_wind_farm	L906894	G927298	US65339F1012	1	82	82	6	2058	2098	2138	82	82	82	82	82	82	82	82	82	82	82	82
wind	United States	Americas	Northern America	Irish Creek wind farm	1			301	operating	2021		onshore						NextEra Energy INC		39.6987	-96.5513	exact	Frankfort	Marshall County		Kansas	https://gem.wiki/Irish_Creek_wind_farm	L907600	G910238	US65339F1012	1	301	301	3	2061	2101	2141	0	301	301	301	301	301	301	301	301	301	301	301
wind	United States	Americas	Northern America	Javelina wind farm	1			250	operating	2015		onshore						NextEra Energy INC		27.3115	-98.9772	exact		Webb County		Texas	https://gem.wiki/Javelina_wind_farm	L907374	G910122	US65339F1012	1	450		9	2055	2095	2135	250	250	250	250	250	250	250	250	250	250	250	250
wind	United States	Americas	Northern America	Javelina wind farm	2			200	operating	2016		onshore						NextEra Energy INC		27.5056	-98.9028	exact		Webb County		Texas	https://gem.wiki/Javelina_wind_farm	L907374	G909934	US65339F1012	1	450	450	8	2056	2096	2136	200	200	200	200	200	200	200	200	200	200	200	200
wind	United States	Americas	Northern America	Jordan Creek wind farm	1			402	operating	2020		onshore						NextEra Energy INC		40.4578	-87.383	exact		Warren County		Indiana	https://gem.wiki/Jordan_Creek_wind_farm	L907649	G910297	US65339F1012	1	402	402	4	2060	2100	2140	402	402	402	402	402	402	402	402	402	402	402	402
wind	United States	Americas	Northern America	King Mountain Wind Ranch wind farm	1			278	operating	2001		onshore						NextEra Energy INC		31.271	-102.189	exact		Upton County		Texas	https://gem.wiki/King_Mountain_Wind_Ranch_wind_farm	L907534	G910166	US65339F1012	1	278	278	23	2041	2081	2121	278	278	278	278	278	278	278	278	278	278	278	278
wind	United States	Americas	Northern America	Kingman Wind Energy Center	1		Kingman Wind	207	operating	2016		onshore						NextEra Energy INC		37.5772	-98.1768	exact		Kingman County		Kansas	https://gem.wiki/Kingman_Wind_Energy_Center	L907439	G910029	US65339F1012	1	207	207	8	2056	2096	2136	207	207	207	207	207	207	207	207	207	207	207	207
wind	United States	Americas	Northern America	KODE Novus wind farm	RP			160	announced			onshore						NextEra Energy INC		36.527	-101.369	exact		Texas County		Oklahoma	https://gem.wiki/KODE_Novus_wind_farm	L906610	G921369	US65339F1012	1	160	160	-99	40	80	120	0	0	0	0	0	0	0	0	0	160	160	160
wind	United States	Americas	Northern America	Langdon wind farm	RP			170	operating	2018		onshore						NextEra Energy INC		48.5829	-98.2555	exact					https://gem.wiki/Langdon_wind_farm	L906616	G927304	US65339F1012	1	170	170	6	2058	2098	2138	170	170	170	170	170	170	170	170	170	170	170	170
wind	United States	Americas	Northern America	Lee Dekalb wind farm	1		FPL Energy Illinois Wind LLC Hybrid	218	operating	2009		onshore						NextEra Energy INC		41.8224	-88.785	exact		DeKalb County		Illinois	https://gem.wiki/Lee_Dekalb_wind_farm	L907458	G910060	US65339F1012	1	218	218	15	2049	2089	2129	218	218	218	218	218	218	218	218	218	218	218	218
wind	United States	Americas	Northern America	Limon wind farm	1			200	operating	2012		onshore						NextEra Energy INC		39.3836	-103.53	exact		Elbert County		Colorado	https://gem.wiki/Limon_wind_farm	L907377	G909937	US65339F1012	1	601		12	2052	2092	2132	200	200	200	200	200	200	200	200	200	200	200	200
wind	United States	Americas	Northern America	Limon wind farm	2			200	operating	2012		onshore						NextEra Energy INC		39.3749	-103.52	exact		Lincoln County		Colorado	https://gem.wiki/Limon_wind_farm	L907377	G909938	US65339F1012	1	601		12	2052	2092	2132	200	200	200	200	200	200	200	200	200	200	200	200
wind	United States	Americas	Northern America	Limon wind farm	3			201	operating	2014		onshore						NextEra Energy INC		39.3586	-103.369	exact		Lincoln County		Colorado	https://gem.wiki/Limon_wind_farm	L907377	G909984	US65339F1012	1	601	601	10	2054	2094	2134	201	201	201	201	201	201	201	201	201	201	201	201
wind	United States	Americas	Northern America	Little Blue Wind Project	1			250	operating	2021		onshore						NextEra Energy INC		40.2863	-98.5777	exact	Blue Hill	Webster County		Nebraska	https://gem.wiki/Little_Blue_Wind_Project	L907505	G910132	US65339F1012	1	250	250	3	2061	2101	2141	0	250	250	250	250	250	250	250	250	250	250	250
wind	United States	Americas	Northern America	Lorenzo Winds wind farm	1		Crosby County 2, Fiber Winds Energy	80	operating	2018		onshore						NextEra Energy INC		33.7463	-101.436	exact		Crosby County		Texas	https://gem.wiki/Lorenzo_Winds_wind_farm	L906885	G909273	US65339F1012	1	80	80	6	2058	2098	2138	80	80	80	80	80	80	80	80	80	80	80	80
wind	United States	Americas	Northern America	Luverne (NextEra) Wind Energy Center	1			105	operating	2009		onshore						NextEra Energy INC		47.3505	-97.9509	exact		Steele County		North Dakota	https://gem.wiki/Luverne_(NextEra)_Wind_Energy_Center	L907060	G909495	US65339F1012	1	105	105	15	2049	2089	2129	105	105	105	105	105	105	105	105	105	105	105	105
wind	United States	Americas	Northern America	Majestic wind farm	2B		High Majestic	80	operating	2012		onshore						NextEra Energy INC		35.386	-101.579	exact		Carson County		Texas	https://gem.wiki/Majestic_wind_farm	L906849	G909228	US65339F1012	1	165		12	2052	2092	2132	80	80	80	80	80	80	80	80	80	80	80	80
wind	United States	Americas	Northern America	Majestic wind farm	RP1			85	operating	2020		onshore						NextEra Energy INC		35.3765	-101.536	exact					https://gem.wiki/Majestic_wind_farm	L906849	G927313	US65339F1012	1	165	165	4	2060	2100	2140	85	85	85	85	85	85	85	85	85	85	85	85
wind	United States	Americas	Northern America	Mammoth Plains wind farm	1			199	operating	2014		onshore						NextEra Energy INC		36.0271	-98.7542	exact		Dewey County		Oklahoma	https://gem.wiki/Mammoth_Plains_wind_farm	L907340	G909886	US65339F1012	1	199	199	10	2054	2094	2134	199	199	199	199	199	199	199	199	199	199	199	199
wind	United States	Americas	Northern America	Minco wind farm	2			101	retired	2011	2021	onshore						NextEra Energy INC		35.3237	-98.0737	exact		Grady County		Oklahoma	https://gem.wiki/Minco_wind_farm	L906969	G909445	US65339F1012	1	640		13	2051	2091	2131	101	0	0	0	0	0	0	0	0	0	0	0
wind	United States	Americas	Northern America	Minco wind farm	3			101	retired	2012	2021	onshore						NextEra Energy INC		35.4051	-98.1196	exact		Canadian County		Oklahoma	https://gem.wiki/Minco_wind_farm	L906969	G909446	US65339F1012	1	640		12	2052	2092	2132	101	0	0	0	0	0	0	0	0	0	0	0
wind	United States	Americas	Northern America	Minco wind farm	4			130	operating	2018		onshore						NextEra Energy INC		35.3953	-98.2606	exact		Canadian County		Oklahoma	https://gem.wiki/Minco_wind_farm	L906969	G909605	US65339F1012	1	640		6	2058	2098	2138	130	130	130	130	130	130	130	130	130	130	130	130
wind	United States	Americas	Northern America	Minco wind farm	RP1			99	operating	2020		onshore						NextEra Energy INC		35.2823	-98.0359	exact					https://gem.wiki/Minco_wind_farm	L906969	G927315	US65339F1012	1	640		4	2060	2100	2140	99	99	99	99	99	99	99	99	99	99	99	99
wind	United States	Americas	Northern America	Minco wind farm	RP2			98	operating	2021		onshore						NextEra Energy INC		35.3237	-98.0737	exact					https://gem.wiki/Minco_wind_farm	L906969	G927316	US65339F1012	1	640		3	2061	2101	2141	0	98	98	98	98	98	98	98	98	98	98	98
wind	United States	Americas	Northern America	Minco wind farm	RP3			111	operating	2021		onshore						NextEra Energy INC		35.4051	-98.1196	exact					https://gem.wiki/Minco_wind_farm	L906969	G927317	US65339F1012	1	640	640	3	2061	2101	2141	0	111	111	111	111	111	111	111	111	111	111	111
wind	Canada	Americas	Northern America	Mont Copper wind farm				54	operating	2004		onshore						NextEra Energy INC		48.9779	-65.5506	exact	Mont-Albert	La Haute-Gaspésie		Quebec	https://gem.wiki/Mont_Copper_wind_farm	L906717	G909046	US65339F1012	1	54		20	2044	2084	2124	54	54	54	54	54	54	54	54	54	54	54	54
wind	Canada	Americas	Northern America	Mont Miller wind farm				54	operating	2005		onshore						NextEra Energy INC		48.9981	-65.4863	exact		La Côte-de-Gaspé		Quebec	https://gem.wiki/Mont_Miller_wind_farm	L906718	G909047	US65339F1012	1	54	54	19	2045	2085	2125	54	54	54	54	54	54	54	54	54	54	54	54
wind	United States	Americas	Northern America	Montezuma wind farm	1		FPL Energy Montezuma Winds LLC	37	operating	2010		onshore						NextEra Energy INC		38.1626	-121.793	exact		Solano County		California	https://gem.wiki/Montezuma_wind_farm	L906590	G908889	US65339F1012	1	115		14	2050	2090	2130	37	37	37	37	37	37	37	37	37	37	37	37
wind	United States	Americas	Northern America	Montezuma wind farm	2			78	operating	2012		onshore						NextEra Energy INC		38.1169	-121.81	exact		Solano County		California	https://gem.wiki/Montezuma_wind_farm	L906590	G909216	US65339F1012	1	115	115	12	2052	2092	2132	78	78	78	78	78	78	78	78	78	78	78	78
wind	United States	Americas	Northern America	New Mexico Wind Energy Center	1			204	operating	2003		onshore						NextEra Energy INC		34.5374	-104.081	exact		De Baca County		New Mexico	https://gem.wiki/New_Mexico_Wind_Energy_Center	L907431	G910019	US65339F1012	1	204	204	21	2043	2083	2123	204	204	204	204	204	204	204	204	204	204	204	204
wind	United States	Americas	Northern America	Ninnescah wind farm	1			208	operating	2016		onshore						NextEra Energy INC		37.6229	-98.5542	exact		Pratt County		Kansas	https://gem.wiki/Ninnescah_wind_farm	L907442	G910032	US65339F1012	1	208	208	8	2056	2096	2136	208	208	208	208	208	208	208	208	208	208	208	208
wind	United States	Americas	Northern America	Niyol wind farm	1			206	operating	2021		onshore						NextEra Energy INC		40.633	-102.927	exact	Fleming	Logan County		Colorado	https://gem.wiki/Niyol_wind_farm	L907383	G909947	US65339F1012	1	206	206	3	2061	2101	2141	0	206	206	206	206	206	206	206	206	206	206	206
wind	United States	Americas	Northern America	North Dakota wind farm	1A		FPL Energy North Dakota Wind I/II	40	operating	2003		onshore						NextEra Energy INC		46.3541	-98.8996	exact		LaMoure County		North Dakota	https://gem.wiki/North_Dakota_wind_farm	L906445	G908921	US65339F1012	1	61		21	2043	2083	2123	40	40	40	40	40	40	40	40	40	40	40	40
wind	United States	Americas	Northern America	North Dakota wind farm	1B		FPL Energy North Dakota Wind I/II	21	operating	2003		onshore						NextEra Energy INC		46.318	-98.8732	exact		LaMoure County		North Dakota	https://gem.wiki/North_Dakota_wind_farm	L906445	G908725	US65339F1012	1	61	61	21	2043	2083	2123	21	21	21	21	21	21	21	21	21	21	21	21
wind	United States	Americas	Northern America	North Sky River wind farm	1			162	operating	2012		onshore						NextEra Energy INC		35.3064	-118.226	exact		Kern County		California	https://gem.wiki/North_Sky_River_wind_farm	L907269	G909795	US65339F1012	1	162	162	12	2052	2092	2132	162	162	162	162	162	162	162	162	162	162	162	162
wind	United States	Americas	Northern America	Northern Divide Wind Energy Center	1		Burke Wind farm	199	operating	2021		onshore						NextEra Energy INC		48.8026	-102.867	exact		Burke County		North Dakota	https://gem.wiki/Northern_Divide_Wind_Energy_Center	L907345	G909893	US65339F1012	1	199	199	3	2061	2101	2141	0	199	199	199	199	199	199	199	199	199	199	199
wind	United States	Americas	Northern America	Oklahoma Wind Energy Center	RP		Mooreland	102	operating	2020		onshore						NextEra Energy INC		36.5801	-99.283	exact					https://gem.wiki/Oklahoma_Wind_Energy_Center	L906706	G927328	US65339F1012	1	102	102	4	2060	2100	2140	102	102	102	102	102	102	102	102	102	102	102	102
[truncated: 69 more rows]
[truncated: 19 more columns]

## Sheet: NextEraEnergy_fossilfuel
Type	Country/area	Region	Subregion	Plant / Project name	Unit / Phase name	Plant / Project name (local)	Plant / Project name (other)	Capacity (MW)	Status	Start year	Retired year	Technology	Fuel	Country/area 1 (hydropower only)	Country/area 2 (hydropower only)	Country/area 1 Capacity (MW) (hydropower only)	Country/area 2 Capacity (MW) (hydropower only)	Owner	Parent	Latitude	Longitude	Location accuracy	City	Local area (taluk, county)	Major area (prefecture, district)	Subnational unit (state, province)	GEM.Wiki URL	GEM location ID	GEM unit/phase ID	CompISIN	Ownership	Plant capacity	Plant capacity	Age	Reinvestment year	Reinvestment year	Reinvestment year	Coal capacity factor 2020	Gas capacity factor 2020	Oil capacity factor 2020	Coal capacity factor 2021	Gas capacity factor 2021	Oil capacity factor 2021	Coal capacity factor 2022	Gas capacity factor 2022	Oil capacity factor 2022	Coal capacity factor 2022	Gas capacity factor 2022	Oil capacity factor 2022
[truncated: 165 more rows]
[truncated: 28 more columns]
