# Supplementary material for: Assessing corporate transition plans using a production asset-based planning approach
Source: Research Square preprint supplement (doi:10.21203/rs.3.rs-5245457/v1), 2024-12-09
Supplement: Supplementary file 30 [file 8 DukeEnergy.xlsx]

## Sheet: DukeEnergy_all
Type	Country/area	Region	Subregion	Plant / Project name	Unit / Phase name	Plant / Project name (local)	Plant / Project name (other)	Capacity (MW)	Status	Start year	Retired year	Technology	Fuel	Country/area 1 (hydropower only)	Country/area 2 (hydropower only)	Country/area 1 Capacity (MW) (hydropower only)	Country/area 2 Capacity (MW) (hydropower only)	Owner	Parent	Latitude	Longitude	Location accuracy	City	Local area (taluk, county)	Major area (prefecture, district)	Subnational unit (state, province)	GEM.Wiki URL	GEM location ID	GEM unit/phase ID	CompISIN	Ownership	Plant capacity	Plant capacity	Age	Reinvestment year	Reinvestment year	Reinvestment year
coal	United States	Americas	Northern America	Asheville Plant	Unit 1			206.6	retired	1964	2020	subcritical	bituminous					Duke Energy Progress [100%]	Duke Energy Corp [100.0%]	35.4706	-82.5435	exact	Skyland	Buncombe		North Carolina	https://www.gem.wiki/Asheville_Plant	L100000104071	G100000100372	US26441C2044	1	1425.6		60	2004	2044	2084
coal	United States	Americas	Northern America	Asheville Plant	Unit 2			207	retired	1971	2020	subcritical	bituminous					Duke Energy Progress [100%]	Duke Energy Corp [100.0%]	35.4706	-82.5435	exact	Skyland	Buncombe		North Carolina	https://www.gem.wiki/Asheville_Plant	L100000104071	G100000100373	US26441C2044	1	1425.6	1425.6	53	2011	2051	2091
coal	United States	Americas	Northern America	Beckjord Generating Station	Unit 1		Walter C. Beckjord Generating Station	115	retired	1952	2012	subcritical	bituminous					Duke Energy Ohio [100%]	Duke Energy Corp [100.0%]	38.9912	-84.2982	exact	New Richmond	Clermont		Ohio	https://www.gem.wiki/Beckjord_Generating_Station	L100000104101	G100000100685	US26441C2044	1	1221.3		72	1992	2032	2072
coal	United States	Americas	Northern America	Beckjord Generating Station	Unit 2		Walter C. Beckjord Generating Station	112.5	retired	1953	2013	subcritical	bituminous					Duke Energy Ohio [100%]	Duke Energy Corp [100.0%]	38.9912	-84.2982	exact	New Richmond	Clermont		Ohio	https://www.gem.wiki/Beckjord_Generating_Station	L100000104101	G100000100686	US26441C2044	1	1221.3		71	1993	2033	2073
coal	United States	Americas	Northern America	Beckjord Generating Station	Unit 3		Walter C. Beckjord Generating Station	125	retired	1954	2013	subcritical	bituminous					Duke Energy Ohio [100%]	Duke Energy Corp [100.0%]	38.9912	-84.2982	exact	New Richmond	Clermont		Ohio	https://www.gem.wiki/Beckjord_Generating_Station	L100000104101	G100000100687	US26441C2044	1	1221.3		70	1994	2034	2074
coal	United States	Americas	Northern America	Beckjord Generating Station	Unit 4		Walter C. Beckjord Generating Station	163.2	retired	1958	2014	subcritical	bituminous					Duke Energy Ohio [100%]	Duke Energy Corp [100.0%]	38.9912	-84.2982	exact	New Richmond	Clermont		Ohio	https://www.gem.wiki/Beckjord_Generating_Station	L100000104101	G100000100688	US26441C2044	1	1221.3		66	1998	2038	2078
coal	United States	Americas	Northern America	Beckjord Generating Station	Unit 5		Walter C. Beckjord Generating Station	244.8	retired	1962	2014	subcritical	bituminous					Duke Energy Ohio [100%]	Duke Energy Corp [100.0%]	38.9912	-84.2982	exact	New Richmond	Clermont		Ohio	https://www.gem.wiki/Beckjord_Generating_Station	L100000104101	G100000100689	US26441C2044	1	1221.3		62	2002	2042	2082
coal	United States	Americas	Northern America	Beckjord Generating Station	Unit 6		Walter C. Beckjord Generating Station	460.8	retired	1969	2014	subcritical	bituminous					AES Ohio [50%]; Columbus Southern Power [12%]; Duke Energy Ohio [37%]	AES Corp [50.0%]; Duke Energy Corp [37.5%]; American Electric Power Co Inc [12.5%]	38.9912	-84.2982	exact	New Richmond	Clermont		Ohio	https://www.gem.wiki/Beckjord_Generating_Station	L100000104101	G100000100690	US26441C2044	0.375	1221.3	1221.3	55	2009	2049	2089
coal	United States	Americas	Northern America	Belews Creek Steam Station	Unit 1			1080	operating	1974	2039	supercritical	bituminous					Duke Energy Carolinas [100%]	Duke Energy Corp [100.0%]	36.2825	-80.0585	exact	Walnut Cove	Stokes		North Carolina	https://www.gem.wiki/Belews_Creek_Steam_Station	L100000104072	G100000100736	US26441C2044	1	2160		50	2014	2054	2094
coal	United States	Americas	Northern America	Belews Creek Steam Station	Unit 2			1080	operating	1975	2039	supercritical	bituminous					Duke Energy Carolinas [100%]	Duke Energy Corp [100.0%]	36.2825	-80.0585	exact	Walnut Cove	Stokes		North Carolina	https://www.gem.wiki/Belews_Creek_Steam_Station	L100000104072	G100000100737	US26441C2044	1	2160	2160	49	2015	2055	2095
coal	United States	Americas	Northern America	Buck Steam Station	Unit 3			80	retired	1941	2011	subcritical	bituminous					Duke Energy Carolinas [100%]	Duke Energy Corp [100.0%]	35.7136	-80.3765	exact	Spencer	Rowan		North Carolina	https://www.gem.wiki/Buck_Steam_Station	L100000104073	G100000101081	US26441C2044	1	1068		83	1981	2021	2061
coal	United States	Americas	Northern America	Buck Steam Station	Unit 4			40	retired	1942	2011	subcritical	bituminous					Duke Energy Carolinas [100%]	Duke Energy Corp [100.0%]	35.7136	-80.3765	exact	Spencer	Rowan		North Carolina	https://www.gem.wiki/Buck_Steam_Station	L100000104073	G100000101082	US26441C2044	1	1068		82	1982	2022	2062
coal	United States	Americas	Northern America	Buck Steam Station	Unit 5			125	retired	1953	2013	subcritical	bituminous					Duke Energy Carolinas [100%]	Duke Energy Corp [100.0%]	35.7136	-80.3765	exact	Spencer	Rowan		North Carolina	https://www.gem.wiki/Buck_Steam_Station	L100000104073	G100000101083	US26441C2044	1	1068		71	1993	2033	2073
coal	United States	Americas	Northern America	Buck Steam Station	Unit 6			125	retired	1953	2013	subcritical	bituminous					Duke Energy Carolinas [100%]	Duke Energy Corp [100.0%]	35.7136	-80.3765	exact	Spencer	Rowan		North Carolina	https://www.gem.wiki/Buck_Steam_Station	L100000104073	G100000101084	US26441C2044	1	1068	1068	71	1993	2033	2073
coal	United States	Americas	Northern America	Cape Fear Steam Plant	Unit 5			140.6	retired	1956	2012	subcritical	bituminous					Duke Energy Progress [100%]	Duke Energy Corp [100.0%]	35.5948	-79.0496	exact	Moncure	Chatham		North Carolina	https://www.gem.wiki/Cape_Fear_Steam_Plant	L100000104074	G100000101203	US26441C2044	1	328.5		68	1996	2036	2076
coal	United States	Americas	Northern America	Cape Fear Steam Plant	Unit 6			187.9	retired	1958	2012	subcritical	bituminous					Duke Energy Progress [100%]	Duke Energy Corp [100.0%]	35.5948	-79.0496	exact	Moncure	Chatham		North Carolina	https://www.gem.wiki/Cape_Fear_Steam_Plant	L100000104074	G100000101204	US26441C2044	1	328.5	328.5	66	1998	2038	2078
coal	United States	Americas	Northern America	Cayuga Generating Station	Unit 1			531	operating	1970	2027	subcritical	bituminous					Duke Energy Indiana [100%]	Duke Energy Corp [100.0%]	39.9233	-87.4274	exact	Cayuga	Vermillion		Indiana	https://www.gem.wiki/Cayuga_Generating_Station	L100000103880	G100000101246	US26441C2044	1	1175		54	2010	2050	2090
coal	United States	Americas	Northern America	Cayuga Generating Station	Unit 2			531	operating	1972	2027	subcritical	bituminous					Duke Energy Indiana [100%]	Duke Energy Corp [100.0%]	39.9233	-87.4274	exact	Cayuga	Vermillion		Indiana	https://www.gem.wiki/Cayuga_Generating_Station	L100000103880	G100000101247	US26441C2044	1	1175	1175	52	2012	2052	2092
coal	United States	Americas	Northern America	Crystal River Energy Complex	Unit 1			440.5	retired	1966	2018	subcritical	bituminous					Duke Energy Florida [100%]	Duke Energy Corp [100.0%]	28.957	-82.7006	exact	Crystal River	Citrus		Florida	https://www.gem.wiki/Crystal_River_Energy_Complex	L100000103825	G100000101839	US26441C2044	1	4412.7		58	2006	2046	2086
coal	United States	Americas	Northern America	Crystal River Energy Complex	Unit 2			523.8	retired	1969	2018	subcritical	bituminous					Duke Energy Florida [100%]	Duke Energy Corp [100.0%]	28.957	-82.7006	exact	Crystal River	Citrus		Florida	https://www.gem.wiki/Crystal_River_Energy_Complex	L100000103825	G100000101840	US26441C2044	1	4412.7		55	2009	2049	2089
coal	United States	Americas	Northern America	Crystal River Energy Complex	Unit 4			739.2	operating	1982		subcritical	bituminous					Duke Energy Florida [100%]	Duke Energy Corp [100.0%]	28.957	-82.7006	exact	Crystal River	Citrus		Florida	https://www.gem.wiki/Crystal_River_Energy_Complex	L100000103825	G100000101841	US26441C2044	1	4412.7		42	2022	2062	2102
coal	United States	Americas	Northern America	Crystal River Energy Complex	Unit 5			739.2	operating	1984		subcritical	bituminous					Duke Energy Florida [100%]	Duke Energy Corp [100.0%]	28.957	-82.7006	exact	Crystal River	Citrus		Florida	https://www.gem.wiki/Crystal_River_Energy_Complex	L100000103825	G100000101842	US26441C2044	1	4412.7	4412.7	40	2024	2064	2104
coal	United States	Americas	Northern America	Dan River Steam Station	Unit 1			70	retired	1949	2012	subcritical	bituminous					Duke Energy Carolinas [100%]	Duke Energy Corp [100.0%]	36.486	-79.7211	exact	Eden	Rockingham		North Carolina	https://www.gem.wiki/Dan_River_Steam_Station	L100000104076	G100000101941	US26441C2044	1	988		75	1989	2029	2069
coal	United States	Americas	Northern America	Dan River Steam Station	Unit 2			70	retired	1950	2012	subcritical	bituminous					Duke Energy Carolinas [100%]	Duke Energy Corp [100.0%]	36.486	-79.7211	exact	Eden	Rockingham		North Carolina	https://www.gem.wiki/Dan_River_Steam_Station	L100000104076	G100000101942	US26441C2044	1	988		74	1990	2030	2070
coal	United States	Americas	Northern America	Dan River Steam Station	Unit 3			150	retired	1955	2012	subcritical	bituminous					Duke Energy Carolinas [100%]	Duke Energy Corp [100.0%]	36.486	-79.7211	exact	Eden	Rockingham		North Carolina	https://www.gem.wiki/Dan_River_Steam_Station	L100000104076	G100000101943	US26441C2044	1	988	988	69	1995	2035	2075
coal	United States	Americas	Northern America	East Bend Generating Station	Unit 2			669.3	operating	1981		subcritical	bituminous					Duke Energy Kentucky [100%]	Duke Energy Corp [100.0%]	38.9042	-84.8513	exact	Rabbit Hash	Boone		Kentucky	https://www.gem.wiki/East_Bend_Generating_Station	L100000103938	G100000102546	US26441C2044	1	669.3	669.3	43	2021	2061	2101
coal	United States	Americas	Northern America	Edwardsport generating station (retired)	Unit 7			40.2	retired	1949	2011	subcritical	bituminous					Duke Energy Indiana [100%]	Duke Energy Corp [100.0%]	38.7978	-87.2516	exact	Edwardsport	Knox		Indiana	https://www.gem.wiki/Edwardsport_generating_station_(retired)	L100000103884	G100000102593	US26441C2044	1	109.2		75	1989	2029	2069
coal	United States	Americas	Northern America	Edwardsport generating station (retired)	Unit 8			69	retired	1951	2011	subcritical	bituminous					Duke Energy Indiana [100%]	Duke Energy Corp [100.0%]	38.7978	-87.2516	exact	Edwardsport	Knox		Indiana	https://www.gem.wiki/Edwardsport_generating_station_(retired)	L100000103884	G100000102594	US26441C2044	1	109.2	109.2	73	1991	2031	2071
coal	United States	Americas	Northern America	Edwardsport power station	Unit 1			236.5	operating	2013		IGCC	unknown					Duke Energy Indiana [100%]	Duke Energy Corp [100.0%]	38.7975	-87.2505	exact	Edwardsport			Indiana	https://www.gem.wiki/Edwardsport_power_station	L100000103885	G100000102595	US26441C2044	1	804.5		11	2053	2093	2133
coal	United States	Americas	Northern America	Edwardsport power station	Unit 2			236.5	operating	2013		IGCC	unknown					Duke Energy Indiana [100%]	Duke Energy Corp [100.0%]	38.7975	-87.2505	exact	Edwardsport			Indiana	https://www.gem.wiki/Edwardsport_power_station	L100000103885	G100000115937	US26441C2044	1	804.5		11	2053	2093	2133
coal	United States	Americas	Northern America	Edwardsport power station	Unit 3			331.5	operating	2013		IGCC	unknown					Duke Energy Indiana [100%]	Duke Energy Corp [100.0%]	38.7975	-87.2505	exact	Edwardsport			Indiana	https://www.gem.wiki/Edwardsport_power_station	L100000103885	G100000115938	US26441C2044	1	804.5	804.5	11	2053	2093	2133
coal	United States	Americas	Northern America	G.G. Allen Steam Plant	Unit 2			165	retired	1957	2021	subcritical	bituminous					Duke Energy Carolinas [100%]	Duke Energy Corp [100.0%]	35.1903	-81.0083	exact	Belmont	Gaston		North Carolina	https://www.gem.wiki/G.G._Allen_Steam_Plant	L100000104079	G100000102876	US26441C2044	1	1155		67	1997	2037	2077
coal	United States	Americas	Northern America	G.G. Allen Steam Plant	Unit 1			165	operating	1957	2024	subcritical	bituminous					Duke Energy Carolinas [100%]	Duke Energy Corp [100.0%]	35.1903	-81.0083	exact	Belmont	Gaston		North Carolina	https://www.gem.wiki/G.G._Allen_Steam_Plant	L100000104079	G100000102875	US26441C2044	1	1155		67	1997	2037	2077
coal	United States	Americas	Northern America	G.G. Allen Steam Plant	Unit 3			275	retired	1959	2021	subcritical	bituminous					Duke Energy Carolinas [100%]	Duke Energy Corp [100.0%]	35.1903	-81.0083	exact	Belmont	Gaston		North Carolina	https://www.gem.wiki/G.G._Allen_Steam_Plant	L100000104079	G100000102877	US26441C2044	1	1155		65	1999	2039	2079
coal	United States	Americas	Northern America	G.G. Allen Steam Plant	Unit 4			275	retired	1960	2021	subcritical	bituminous					Duke Energy Carolinas [100%]	Duke Energy Corp [100.0%]	35.1903	-81.0083	exact	Belmont	Gaston		North Carolina	https://www.gem.wiki/G.G._Allen_Steam_Plant	L100000104079	G100000102878	US26441C2044	1	1155		64	2000	2040	2080
coal	United States	Americas	Northern America	G.G. Allen Steam Plant	Unit 5			275	operating	1961	2024	subcritical	bituminous					Duke Energy Carolinas [100%]	Duke Energy Corp [100.0%]	35.1903	-81.0083	exact	Belmont	Gaston		North Carolina	https://www.gem.wiki/G.G._Allen_Steam_Plant	L100000104079	G100000102879	US26441C2044	1	1155	1155	63	2001	2041	2081
coal	United States	Americas	Northern America	Gallagher Generating Station	Unit 2		R. Gallagher Generating Station	150	retired	1958	2021	subcritical	bituminous					Duke Energy Indiana [100%]	Duke Energy Corp [100.0%]	38.2637	-85.8381	exact	New Albany	Floyd		Indiana	https://www.gem.wiki/Gallagher_Generating_Station	L100000103888	G100000102909	US26441C2044	1	600		66	1998	2038	2078
coal	United States	Americas	Northern America	Gallagher Generating Station	Unit 1		R. Gallagher Generating Station	150	retired	1959	2012	subcritical	bituminous					Duke Energy Indiana [100%]	Duke Energy Corp [100.0%]	38.2637	-85.8381	exact	New Albany	Floyd		Indiana	https://www.gem.wiki/Gallagher_Generating_Station	L100000103888	G100000102908	US26441C2044	1	600		65	1999	2039	2079
coal	United States	Americas	Northern America	Gallagher Generating Station	Unit 3		R. Gallagher Generating Station	150	retired	1960	2012	subcritical	bituminous					Duke Energy Indiana [100%]	Duke Energy Corp [100.0%]	38.2637	-85.8381	exact	New Albany	Floyd		Indiana	https://www.gem.wiki/Gallagher_Generating_Station	L100000103888	G100000102910	US26441C2044	1	600		64	2000	2040	2080
coal	United States	Americas	Northern America	Gallagher Generating Station	Unit 4		R. Gallagher Generating Station	150	retired	1961	2021	subcritical	bituminous					Duke Energy Indiana [100%]	Duke Energy Corp [100.0%]	38.2637	-85.8381	exact	New Albany	Floyd		Indiana	https://www.gem.wiki/Gallagher_Generating_Station	L100000103888	G100000102911	US26441C2044	1	600	600	63	2001	2041	2081
coal	United States	Americas	Northern America	Gibson Generating Station	Unit 1			667.9	operating	1975	2035	supercritical	bituminous					Duke Energy Indiana [100%]	Duke Energy Corp [100.0%]	38.3714	-87.7682	exact	East Mount Carmel	Gibson		Indiana	https://www.gem.wiki/Gibson_Generating_Station	L100000103889	G100000103028	US26441C2044	1	3339.5		49	2015	2055	2095
coal	United States	Americas	Northern America	Gibson Generating Station	Unit 2			667.9	operating	1976	2035	supercritical	bituminous					Duke Energy Indiana [100%]	Duke Energy Corp [100.0%]	38.3714	-87.7682	exact	East Mount Carmel	Gibson		Indiana	https://www.gem.wiki/Gibson_Generating_Station	L100000103889	G100000103029	US26441C2044	1	3339.5		48	2016	2056	2096
coal	United States	Americas	Northern America	Gibson Generating Station	Unit 3			667.9	operating	1978	2029	supercritical	bituminous					Duke Energy Indiana [100%]	Duke Energy Corp [100.0%]	38.3714	-87.7682	exact	East Mount Carmel	Gibson		Indiana	https://www.gem.wiki/Gibson_Generating_Station	L100000103889	G100000103030	US26441C2044	1	3339.5		46	2018	2058	2098
coal	United States	Americas	Northern America	Gibson Generating Station	Unit 4			667.9	operating	1979	2029	supercritical	bituminous					Duke Energy Indiana [100%]	Duke Energy Corp [100.0%]	38.3714	-87.7682	exact	East Mount Carmel	Gibson		Indiana	https://www.gem.wiki/Gibson_Generating_Station	L100000103889	G100000103031	US26441C2044	1	3339.5		45	2019	2059	2099
coal	United States	Americas	Northern America	Gibson Generating Station	Unit 5			667.9	operating	1982	2025	supercritical	bituminous					Wabash Valley Power Association [25%]; Indiana Municipal Power Agency [24%]; Duke Energy Indiana [50%]	Duke Energy Corp [50.0%]; Wabash Valley Power Association [25.0%]; Indiana Municipal Power Agency [25.0%]	38.3714	-87.7682	exact	East Mount Carmel	Gibson		Indiana	https://www.gem.wiki/Gibson_Generating_Station	L100000103889	G100000103032	US26441C2044	0.5	3339.5	3339.5	42	2022	2062	2102
coal	United States	Americas	Northern America	H.B. Robinson Steam power station	Unit 1		Hb Robinson One power station, H.B. Robinson Steam Plant	206.6	retired	1960	2012	subcritical	bituminous					Duke Energy Progress [100%]	Duke Energy Corp [100.0%]	34.4031	-80.1568	exact	Hartsville	Darlington		South Carolina	https://www.gem.wiki/H.B._Robinson_Steam_power_station	L100000104175	G100000103514	US26441C2044	1	206.6	206.6	64	2000	2040	2080
coal	United States	Americas	Northern America	James E. Rogers Energy Complex	Unit 1		Cliffside Plant	40	retired	1940	2011	subcritical	bituminous					Duke Energy Carolinas [100%]	Duke Energy Corp [100.0%]	35.2164	-81.7624	exact	Cliffside	Cleveland		North Carolina	https://www.gem.wiki/James_E._Rogers_Energy_Complex	L100000104075	G100000101604	US26441C2044	1	1740.5		84	1980	2020	2060
coal	United States	Americas	Northern America	James E. Rogers Energy Complex	Unit 2		Cliffside Plant	40	retired	1940	2011	subcritical	bituminous					Duke Energy Carolinas [100%]	Duke Energy Corp [100.0%]	35.2164	-81.7624	exact	Cliffside	Cleveland		North Carolina	https://www.gem.wiki/James_E._Rogers_Energy_Complex	L100000104075	G100000101605	US26441C2044	1	1740.5		84	1980	2020	2060
coal	United States	Americas	Northern America	James E. Rogers Energy Complex	Unit 3		Cliffside Plant	65	retired	1948	2011	subcritical	bituminous					Duke Energy Carolinas [100%]	Duke Energy Corp [100.0%]	35.2164	-81.7624	exact	Cliffside	Cleveland		North Carolina	https://www.gem.wiki/James_E._Rogers_Energy_Complex	L100000104075	G100000101606	US26441C2044	1	1740.5		76	1988	2028	2068
coal	United States	Americas	Northern America	James E. Rogers Energy Complex	Unit 4		Cliffside Plant	65	retired	1948	2011	subcritical	bituminous					Duke Energy Carolinas [100%]	Duke Energy Corp [100.0%]	35.2164	-81.7624	exact	Cliffside	Cleveland		North Carolina	https://www.gem.wiki/James_E._Rogers_Energy_Complex	L100000104075	G100000101607	US26441C2044	1	1740.5		76	1988	2028	2068
coal	United States	Americas	Northern America	James E. Rogers Energy Complex	Unit 5		Cliffside Plant	621	operating	1972	2025	subcritical	bituminous					Duke Energy Carolinas [100%]	Duke Energy Corp [100.0%]	35.2164	-81.7624	exact	Cliffside	Cleveland		North Carolina	https://www.gem.wiki/James_E._Rogers_Energy_Complex	L100000104075	G100000101608	US26441C2044	1	1740.5	1740.5	52	2012	2052	2092
coal	United States	Americas	Northern America	Lee Steam Plant	Unit 1		HF Lee power station	90	retired	1951	2012	subcritical	bituminous					Duke Energy Progress [100%]	Duke Energy Corp [100.0%]	35.3798	-78.0872	exact	Goldsboro	Wayne		North Carolina	https://www.gem.wiki/Lee_Steam_Plant	L100000104080	G100000106222	US26441C2044	1	1500.5		73	1991	2031	2071
coal	United States	Americas	Northern America	Lee Steam Plant	Unit 2		HF Lee power station	90	retired	1952	2012	subcritical	bituminous					Duke Energy Progress [100%]	Duke Energy Corp [100.0%]	35.3798	-78.0872	exact	Goldsboro	Wayne		North Carolina	https://www.gem.wiki/Lee_Steam_Plant	L100000104080	G100000106223	US26441C2044	1	1500.5		72	1992	2032	2072
coal	United States	Americas	Northern America	Lee Steam Plant	Unit 3		HF Lee power station	252.5	retired	1962	2012	subcritical	bituminous					Duke Energy Progress [100%]	Duke Energy Corp [100.0%]	35.3798	-78.0872	exact	Goldsboro	Wayne		North Carolina	https://www.gem.wiki/Lee_Steam_Plant	L100000104080	G100000106224	US26441C2044	1	1500.5	1500.5	62	2002	2042	2082
coal	United States	Americas	Northern America	Marshall Steam Station	Unit 1			350	operating	1965	2028	subcritical	bituminous					Duke Energy Carolinas [100%]	Duke Energy Corp [100.0%]	35.5979	-80.9612	exact	Terrell	Catawba		North Carolina	https://www.gem.wiki/Marshall_Steam_Station	L100000104082	G100000106696	US26441C2044	1	1996		59	2005	2045	2085
coal	United States	Americas	Northern America	Marshall Steam Station	Unit 2			350	operating	1966	2028	subcritical	bituminous					Duke Energy Carolinas [100%]	Duke Energy Corp [100.0%]	35.5979	-80.9612	exact	Terrell	Catawba		North Carolina	https://www.gem.wiki/Marshall_Steam_Station	L100000104082	G100000106697	US26441C2044	1	1996		58	2006	2046	2086
coal	United States	Americas	Northern America	Marshall Steam Station	Unit 3			648	operating	1969	2033	supercritical	bituminous					Duke Energy Carolinas [100%]	Duke Energy Corp [100.0%]	35.5979	-80.9612	exact	Terrell	Catawba		North Carolina	https://www.gem.wiki/Marshall_Steam_Station	L100000104082	G100000106698	US26441C2044	1	1996		55	2009	2049	2089
coal	United States	Americas	Northern America	Marshall Steam Station	Unit 4			648	operating	1970	2033	supercritical	bituminous					Duke Energy Carolinas [100%]	Duke Energy Corp [100.0%]	35.5979	-80.9612	exact	Terrell	Catawba		North Carolina	https://www.gem.wiki/Marshall_Steam_Station	L100000104082	G100000106699	US26441C2044	1	1996	1996	54	2010	2050	2090
coal	United States	Americas	Northern America	Mayo Generating Plant	Unit 1			735.8	operating	1983	2028	subcritical	bituminous					Duke Energy Progress [100%]	Duke Energy Corp [100.0%]	36.5278	-78.8919	exact	Bethel Hill	Person		North Carolina	https://www.gem.wiki/Mayo_Generating_Plant	L100000104083	G100000106764	US26441C2044	1	735.8	735.8	41	2023	2063	2103
coal	United States	Americas	Northern America	Miami Fort Station	Unit 5			100	retired	1949	2008	subcritical	unknown					Luminant Miami Fort [100%]	Duke Energy Corp; Vistra Corp	39.1131	-84.8029	exact	North Bend	Hamilton		Ohio	https://www.gem.wiki/Miami_Fort_Station	L100000104113	G100000114580	US26441C2044	1	1377.4		75	1989	2029	2069
coal	United States	Americas	Northern America	Miami Fort Station	Unit 6			163.2	retired	1960	2015	subcritical	bituminous					Duke Energy Ohio [100%]	Duke Energy Corp [100.0%]	39.1131	-84.8029	exact	North Bend	Hamilton		Ohio	https://www.gem.wiki/Miami_Fort_Station	L100000104113	G100000106902	US26441C2044	1	1377.4		64	2000	2040	2080
coal	United States	Americas	Northern America	Miami Fort Station	Unit 7			557.1	operating	1975	2027	subcritical	bituminous					Luminant Miami Fort [100%]	Duke Energy Corp; Vistra Corp	39.1131	-84.8029	exact	North Bend	Hamilton		Ohio	https://www.gem.wiki/Miami_Fort_Station	L100000104113	G100000106903	US26441C2044	1	1377.4		49	2015	2055	2095
coal	United States	Americas	Northern America	Miami Fort Station	Unit 8			557.1	operating	1978	2027	subcritical	bituminous					Luminant Miami Fort [100%]	Duke Energy Corp; Vistra Corp	39.1131	-84.8029	exact	North Bend	Hamilton		Ohio	https://www.gem.wiki/Miami_Fort_Station	L100000104113	G100000106904	US26441C2044	1	1377.4	1377.4	46	2018	2058	2098
coal	United States	Americas	Northern America	Riverbend Steam Station	Unit 4		Riverbend Gaston power station	100	retired	1952	2013	subcritical	bituminous					Duke Energy Carolinas [100%]	Duke Energy Corp [100.0%]	35.3601	-80.9735	exact	Mount Holly	Gaston		North Carolina	https://www.gem.wiki/Riverbend_Steam_Station	L100000104084	G100000108590	US26441C2044	1	466		72	1992	2032	2072
coal	United States	Americas	Northern America	Riverbend Steam Station	Unit 5		Riverbend Gaston power station	100	retired	1952	2013	subcritical	bituminous					Duke Energy Carolinas [100%]	Duke Energy Corp [100.0%]	35.3601	-80.9735	exact	Mount Holly	Gaston		North Carolina	https://www.gem.wiki/Riverbend_Steam_Station	L100000104084	G100000108591	US26441C2044	1	466		72	1992	2032	2072
coal	United States	Americas	Northern America	Riverbend Steam Station	Unit 6		Riverbend Gaston power station	133	retired	1954	2013	subcritical	bituminous					Duke Energy Carolinas [100%]	Duke Energy Corp [100.0%]	35.3601	-80.9735	exact	Mount Holly	Gaston		North Carolina	https://www.gem.wiki/Riverbend_Steam_Station	L100000104084	G100000108592	US26441C2044	1	466		70	1994	2034	2074
coal	United States	Americas	Northern America	Riverbend Steam Station	Unit 7		Riverbend Gaston power station	133	retired	1954	2013	subcritical	bituminous					Duke Energy Carolinas [100%]	Duke Energy Corp [100.0%]	35.3601	-80.9735	exact	Mount Holly	Gaston		North Carolina	https://www.gem.wiki/Riverbend_Steam_Station	L100000104084	G100000108593	US26441C2044	1	466	466	70	1994	2034	2074
coal	United States	Americas	Northern America	Roxboro Steam Plant	Unit 1			410.8	operating	1966	2028	subcritical	bituminous					Duke Energy Progress [100%]	Duke Energy Corp [100.0%]	36.4841	-79.0722	exact	Roxboro	Person		North Carolina	https://www.gem.wiki/Roxboro_Steam_Plant	L100000104086	G100000108650	US26441C2044	1	2558.2		58	2006	2046	2086
coal	United States	Americas	Northern America	Roxboro Steam Plant	Unit 2			657	operating	1968	2028	subcritical	bituminous					Duke Energy Progress [100%]	Duke Energy Corp [100.0%]	36.4841	-79.0722	exact	Roxboro	Person		North Carolina	https://www.gem.wiki/Roxboro_Steam_Plant	L100000104086	G100000108651	US26441C2044	1	2558.2		56	2008	2048	2088
coal	United States	Americas	Northern America	Roxboro Steam Plant	Unit 3			745.2	operating	1973	2029	subcritical	bituminous					Duke Energy Progress [100%]	Duke Energy Corp [100.0%]	36.4841	-79.0722	exact	Roxboro	Person		North Carolina	https://www.gem.wiki/Roxboro_Steam_Plant	L100000104086	G100000108652	US26441C2044	1	2558.2		51	2013	2053	2093
coal	United States	Americas	Northern America	Roxboro Steam Plant	Unit 4			745.2	operating	1980	2029	subcritical	bituminous					Duke Energy Progress [100%]	Duke Energy Corp [100.0%]	36.4841	-79.0722	exact	Roxboro	Person		North Carolina	https://www.gem.wiki/Roxboro_Steam_Plant	L100000104086	G100000108653	US26441C2044	1	2558.2	2558.2	44	2020	2060	2100
coal	United States	Americas	Northern America	Sutton Steam Plant	Unit 1		LV Sutton power station, L.V. Sutton Steam Electric Plant	112.5	retired	1954	2013	subcritical	bituminous					Duke Energy Progress [100%]	Duke Energy Corp [100.0%]	34.2828	-77.9864	exact	Wilmington	New Hanover		North Carolina	https://www.gem.wiki/Sutton_Steam_Plant	L100000104087	G100000109753	US26441C2044	1	671.6		70	1994	2034	2074
coal	United States	Americas	Northern America	Sutton Steam Plant	Unit 2		LV Sutton power station, L.V. Sutton Steam Electric Plant	112.5	retired	1955	2013	subcritical	bituminous					Duke Energy Progress [100%]	Duke Energy Corp [100.0%]	34.2828	-77.9864	exact	Wilmington	New Hanover		North Carolina	https://www.gem.wiki/Sutton_Steam_Plant	L100000104087	G100000109754	US26441C2044	1	671.6		69	1995	2035	2075
coal	United States	Americas	Northern America	Sutton Steam Plant	Unit 3		LV Sutton power station, L.V. Sutton Steam Electric Plant	446.6	retired	1972	2013	subcritical	bituminous					Duke Energy Progress [100%]	Duke Energy Corp [100.0%]	34.2828	-77.9864	exact	Wilmington	New Hanover		North Carolina	https://www.gem.wiki/Sutton_Steam_Plant	L100000104087	G100000109755	US26441C2044	1	671.6	671.6	52	2012	2052	2092
coal	United States	Americas	Northern America	W.S. Lee Steam Station	Unit 1		William States Lee III power station	90	retired	1951	2014	subcritical	bituminous					Duke Energy Carolinas [100%]	Duke Energy Corp [100.0%]	34.6023	-82.4349	exact	Pelzer	Anderson		South Carolina	https://www.gem.wiki/W.S._Lee_Steam_Station	L100000104179	G100000110675	US26441C2044	1	1473		73	1991	2031	2071
coal	United States	Americas	Northern America	W.S. Lee Steam Station	Unit 2		William States Lee III power station	90	retired	1951	2014	subcritical	bituminous					Duke Energy Carolinas [100%]	Duke Energy Corp [100.0%]	34.6023	-82.4349	exact	Pelzer	Anderson		South Carolina	https://www.gem.wiki/W.S._Lee_Steam_Station	L100000104179	G100000110676	US26441C2044	1	1473		73	1991	2031	2071
coal	United States	Americas	Northern America	W.S. Lee Steam Station	Unit 3		William States Lee III power station	175	retired	1958	2015	subcritical	bituminous					Duke Energy Carolinas [100%]	Duke Energy Corp [100.0%]	34.6023	-82.4349	exact	Pelzer	Anderson		South Carolina	https://www.gem.wiki/W.S._Lee_Steam_Station	L100000104179	G100000110677	US26441C2044	1	1473	1473	66	1998	2038	2078
coal	United States	Americas	Northern America	Wabash River Generating Station	Unit 2		Wabash River IGCC GT1 (Platts) (Unit 1A)	112.5	retired	1953	2016	subcritical	bituminous					Duke Energy Indiana [100%]	Duke Energy Corp [100.0%]	39.5274	-87.4232	exact	Terre Haute	Vigo		Indiana	https://www.gem.wiki/Wabash_River_Generating_Station	L100000103899	G100000110681	US26441C2044	1	860.2		71	1993	2033	2073
coal	United States	Americas	Northern America	Wabash River Generating Station	Unit 3		Wabash River IGCC GT1 (Platts) (Unit 1A)	123.2	retired	1954	2016	subcritical	bituminous					Duke Energy Indiana [100%]	Duke Energy Corp [100.0%]	39.5274	-87.4232	exact	Terre Haute	Vigo		Indiana	https://www.gem.wiki/Wabash_River_Generating_Station	L100000103899	G100000110682	US26441C2044	1	860.2		70	1994	2034	2074
coal	United States	Americas	Northern America	Wabash River Generating Station	Unit 4		Wabash River IGCC GT1 (Platts) (Unit 1A)	112.5	retired	1955	2016	subcritical	bituminous					Duke Energy Indiana [100%]	Duke Energy Corp [100.0%]	39.5274	-87.4232	exact	Terre Haute	Vigo		Indiana	https://www.gem.wiki/Wabash_River_Generating_Station	L100000103899	G100000110683	US26441C2044	1	860.2		69	1995	2035	2075
coal	United States	Americas	Northern America	Wabash River Generating Station	Unit 5		Wabash River IGCC GT1 (Platts) (Unit 1A)	125	retired	1956	2016	subcritical	bituminous					Duke Energy Indiana [100%]	Duke Energy Corp [100.0%]	39.5274	-87.4232	exact	Terre Haute	Vigo		Indiana	https://www.gem.wiki/Wabash_River_Generating_Station	L100000103899	G100000110684	US26441C2044	1	860.2		68	1996	2036	2076
coal	United States	Americas	Northern America	Wabash River Generating Station	Unit 6		Wabash River IGCC GT1 (Platts) (Unit 1A)	387	retired	1968	2016	subcritical	bituminous					Duke Energy Indiana [100%]	Duke Energy Corp [100.0%]	39.5274	-87.4232	exact	Terre Haute	Vigo		Indiana	https://www.gem.wiki/Wabash_River_Generating_Station	L100000103899	G100000110685	US26441C2044	1	860.2	860.2	56	2008	2048	2088
coal	United States	Americas	Northern America	Weatherspoon Plant	Unit 1		WH Weatherspoon power station	46	retired	1949	2011	subcritical	bituminous					Duke Energy Progress [100%]	Duke Energy Corp [100.0%]	34.5895	-78.9756	exact	Lumberton	Robeson		North Carolina	https://www.gem.wiki/Weatherspoon_Plant	L100000104088	G100000110757	US26441C2044	1	165.5		75	1989	2029	2069
coal	United States	Americas	Northern America	Weatherspoon Plant	Unit 2		WH Weatherspoon power station	46	retired	1950	2011	subcritical	bituminous					Duke Energy Progress [100%]	Duke Energy Corp [100.0%]	34.5895	-78.9756	exact	Lumberton	Robeson		North Carolina	https://www.gem.wiki/Weatherspoon_Plant	L100000104088	G100000110758	US26441C2044	1	165.5		74	1990	2030	2070
coal	United States	Americas	Northern America	Weatherspoon Plant	Unit 3		WH Weatherspoon power station	73.5	retired	1952	2011	subcritical	bituminous					Duke Energy Progress [100%]	Duke Energy Corp [100.0%]	34.5895	-78.9756	exact	Lumberton	Robeson		North Carolina	https://www.gem.wiki/Weatherspoon_Plant	L100000104088	G100000110759	US26441C2044	1	165.5	165.5	72	1992	2032	2072
hydropower	United States	Americas	Northern America	Bad Creek hydroelectric plant				1488	operating	1991		pumped storage				TRUE	FALSE	Duke Energy Carolinas LLC		35.0075	-82.9975	exact	Salem	Oconee County		South Carolina	https://gem.wiki/Bad_Creek_hydroelectric_plant	L603716	G603754	US26441C2044	1	1488	1488	33	2031	2071	2111
hydropower	United States	Americas	Northern America	Cowans Ford hydroelectric plant				350	operating	1963		run-of-river				TRUE	FALSE	Duke Energy Carolinas LLC		35.4346	-80.9588	exact	Stanley	Lincoln County		North Carolina	https://gem.wiki/Cowans_Ford_hydroelectric_plant	L603771	G603809	US26441C2044	1	350	350	61	2003	2043	2083
hydropower	United States	Americas	Northern America	Jocassee hydroelectric plant				774	operating	1973		pumped storage				TRUE	FALSE	Duke Energy Carolinas LLC		34.9594	-82.9147	exact	Salem	Pickens County		South Carolina	https://gem.wiki/Jocassee_hydroelectric_plant	L603831	G603869	US26441C2044	1	774	774	51	2013	2053	2093
hydropower	United States	Americas	Northern America	Keowee hydroelectric plant				158	operating	1971		conventional storage				TRUE	FALSE	Duke Energy Carolinas LLC		34.7981	-82.8872	exact	Seneca	Pickens County		South Carolina	https://gem.wiki/Keowee_hydroelectric_plant	L603841	G603879	US26441C2044	1	158	158	53	2011	2051	2091
hydropower	United States	Americas	Northern America	Markland hydroelectric plant				78	operating	1967		run-of-river				TRUE	FALSE	Duke Energy Indiana LLC		38.7795	-84.964	exact	Florence	Switzerland County		Indiana	https://gem.wiki/Markland_hydroelectric_plant	L603860	G603898	US26441C2044	1	78	78	57	2007	2047	2087
hydropower	United States	Americas	Northern America	Tillery hydroelectric plant				84	operating	1928		conventional storage				TRUE	FALSE	Duke Energy Progress (NC)		35.2067	-80.0648	exact	Mount Gilead	Montgomery County		North Carolina	https://gem.wiki/Tillery_hydroelectric_plant	L603946	G603984	US26441C2044	1	84	84	96	1968	2008	2048
hydropower	United States	Americas	Northern America	Walters hydroelectric plant				108	operating	1930		conventional storage				TRUE	FALSE	Duke Energy Progress (NC)		35.6946	-83.0503	exact	Waterville	Haywood County		North Carolina	https://gem.wiki/Walters_hydroelectric_plant	L603955	G603993	US26441C2044	1	108	108	94	1970	2010	2050
hydropower	United States	Americas	Northern America	Wateree hydroelectric plant				91	operating	1919		run-of-river				TRUE	FALSE	Duke Energy Carolinas LLC		34.3355	-80.7021	exact	Ridgeway	Kershaw County		South Carolina	https://gem.wiki/Wateree_hydroelectric_plant	L603957	G603995	US26441C2044	1	91	91	105	1959	1999	2039
nuclear	United States	Americas	Northern America	Crystal River nuclear power plant	3			890	retired	1977	2013	pressurized water reactor						Duke Energy CORP		28.9578	-82.6983	exact		Citrus County		Florida	https://gem.wiki/Crystal_River_nuclear_power_plant	L500270	G500630	US26441C2044	1	890	890	47	2017	2057	2097
nuclear	United States	Americas	Northern America	Levy County nuclear power plant	1			1250	cancelled			pressurized water reactor						Duke Energy CORP		29.0733	-82.6217	exact		Levy County		Florida	https://gem.wiki/Levy_County_nuclear_power_plant	L500483	G501390	US26441C2044	1	2500		-99	40	80	120
nuclear	United States	Americas	Northern America	Levy County nuclear power plant	2			1250	cancelled			pressurized water reactor						Duke Energy CORP		29.0733	-82.6217	exact		Levy County		Florida	https://gem.wiki/Levy_County_nuclear_power_plant	L500483	G501391	US26441C2044	1	2500	2500	-99	40	80	120
nuclear	United States	Americas	Northern America	McGuire nuclear power plant	1			1215	operating	1981		pressurized water reactor						Duke Energy CORP		35.4331	-80.9486	exact		Mecklenburg County		North Carolina	https://gem.wiki/McGuire_nuclear_power_plant	L500068	G500117	US26441C2044	1	2430		43	2021	2061	2101
nuclear	United States	Americas	Northern America	McGuire nuclear power plant	2			1215	operating	1984		pressurized water reactor						Duke Energy CORP		35.4331	-80.9486	exact		Mecklenburg County		North Carolina	https://gem.wiki/McGuire_nuclear_power_plant	L500068	G500118	US26441C2044	1	2430	2430	40	2024	2064	2104
nuclear	United States	Americas	Northern America	Oconee nuclear power plant	1			891	operating	1973		pressurized water reactor						Duke Energy CORP		34.7939	-82.8986	exact		Oconee County		South Carolina	https://gem.wiki/Oconee_nuclear_power_plant	L500152	G500348	US26441C2044	1	2682		51	2013	2053	2093
nuclear	United States	Americas	Northern America	Oconee nuclear power plant	2			891	operating	1974		pressurized water reactor						Duke Energy CORP		34.7939	-82.8986	exact		Oconee County		South Carolina	https://gem.wiki/Oconee_nuclear_power_plant	L500152	G500349	US26441C2044	1	2682		50	2014	2054	2094
nuclear	United States	Americas	Northern America	Oconee nuclear power plant	3			900	operating	1974		pressurized water reactor						Duke Energy CORP		34.7939	-82.8986	exact		Oconee County		South Carolina	https://gem.wiki/Oconee_nuclear_power_plant	L500152	G500347	US26441C2044	1	2682	2682	50	2014	2054	2094
nuclear	United States	Americas	Northern America	Piketon nuclear power plant	1			1600	cancelled			pressurized water reactor						Duke Energy CORP		39.0124	-83.0008	exact		Pike County		Ohio	https://gem.wiki/Piketon_nuclear_power_plant	L500494	G501417	US26441C2044	1	1600	1600	-99	40	80	120
nuclear	United States	Americas	Northern America	Shearon Harris nuclear power plant	2A		Harris	1100	cancelled			pressurized water reactor						Duke Energy Progress (NC)		35.6334	-78.9556	exact		Wake County		North Carolina	https://gem.wiki/Shearon_Harris_nuclear_power_plant	L500380	G501444	US26441C2044	1	2200		-99	40	80	120
nuclear	United States	Americas	Northern America	Shearon Harris nuclear power plant	3A		Harris	1100	cancelled			pressurized water reactor						Duke Energy Progress (NC)		35.6334	-78.9556	exact		Wake County		North Carolina	https://gem.wiki/Shearon_Harris_nuclear_power_plant	L500380	G501446	US26441C2044	1	2200	2200	-99	40	80	120
nuclear	United States	Americas	Northern America	William States Lee III nuclear power plant	1			1117	cancelled			pressurized water reactor						Duke Energy Carolinas LLC;Southern Company		35.0366	-81.5108	exact		Cherokee County		South Carolina	https://gem.wiki/William_States_Lee_III_nuclear_power_plant	L500515	G501483	US26441C2044	0.5	2234		-99	40	80	120
nuclear	United States	Americas	Northern America	William States Lee III nuclear power plant	2			1117	cancelled			pressurized water reactor						Duke Energy Carolinas LLC;Southern Company		35.0366	-81.5108	exact		Cherokee County		South Carolina	https://gem.wiki/William_States_Lee_III_nuclear_power_plant	L500515	G501484	US26441C2044	0.5	2234	2234	-99	40	80	120
oil/gas	United States	Americas	Northern America	Anclote power station	1			556	operating	1974		ST	NG/FO					Duke Energy Florida LLC [100.0%]	Duke Energy Corp [100.0%]	28.1844	-82.7886	exact	Holiday	Pasco		Florida	https://www.gem.wiki/Anclote_power_station	L100000401865	G100000402735	US26441C2044	1	1112		50	2014	2054	2094
oil/gas	United States	Americas	Northern America	Anclote power station	2			556	operating	1978		ST	NG/FO					Duke Energy Florida LLC [100.0%]	Duke Energy Corp [100.0%]	28.1844	-82.7886	exact	Holiday	Pasco		Florida	https://www.gem.wiki/Anclote_power_station	L100000401865	G100000402736	US26441C2044	1	1112	1112	46	2018	2058	2098
oil/gas	United States	Americas	Northern America	Asheville Plant	GT1			212	operating	1999		GT	NG/FO					Duke Energy Progress LLC [100.0%]	Duke Energy Corp [100.0%]	35.4731	-82.5417	exact	Arden	Buncombe		North Carolina	https://www.gem.wiki/Asheville_Plant	L100000104071	G100000402774	US26441C2044	1	1425.6		25	2039	2079	2119
oil/gas	United States	Americas	Northern America	Asheville Plant	GT2			212	operating	2000		GT	NG/FO					Duke Energy Progress LLC [100.0%]	Duke Energy Corp [100.0%]	35.4731	-82.5417	exact	Arden	Buncombe		North Carolina	https://www.gem.wiki/Asheville_Plant	L100000104071	G100000402775	US26441C2044	1	1425.6		24	2040	2080	2120
oil/gas	United States	Americas	Northern America	Asheville Plant	CC1			294	operating	2019		CC	NG/FO					Duke Energy Progress LLC [100.0%]	Duke Energy Corp [100.0%]	35.4731	-82.5417	exact	Arden	Buncombe		North Carolina	https://www.gem.wiki/Asheville_Plant	L100000104071	G100000401653	US26441C2044	1	1425.6		5	2059	2099	2139
oil/gas	United States	Americas	Northern America	Asheville Plant	CC2			294	operating	2020		CC	NG/FO					Duke Energy Progress LLC [100.0%]	Duke Energy Corp [100.0%]	35.4731	-82.5417	exact	Arden	Buncombe		North Carolina	https://www.gem.wiki/Asheville_Plant	L100000104071	G100000401654	US26441C2044	1	1425.6	1425.6	4	2060	2100	2140
oil/gas	United States	Americas	Northern America	Bayboro power station	P1			56.7	operating	1973		GT	FO					Duke Energy Florida LLC [100.0%]	Duke Energy Corp [100.0%]	27.7581	-82.6353	exact	St. Petersburg	Pinellas		Florida	https://www.gem.wiki/Bayboro_power_station	L100000409200	G100000414308	US26441C2044	1	226.8		51	2013	2053	2093
oil/gas	United States	Americas	Northern America	Bayboro power station	P2			56.7	operating	1973		GT	FO					Duke Energy Florida LLC [100.0%]	Duke Energy Corp [100.0%]	27.7581	-82.6353	exact	St. Petersburg	Pinellas		Florida	https://www.gem.wiki/Bayboro_power_station	L100000409200	G100000414307	US26441C2044	1	226.8		51	2013	2053	2093
oil/gas	United States	Americas	Northern America	Bayboro power station	P3			56.7	operating	1973		GT	FO					Duke Energy Florida LLC [100.0%]	Duke Energy Corp [100.0%]	27.7581	-82.6353	exact	St. Petersburg	Pinellas		Florida	https://www.gem.wiki/Bayboro_power_station	L100000409200	G100000414306	US26441C2044	1	226.8		51	2013	2053	2093
oil/gas	United States	Americas	Northern America	Bayboro power station	P4			56.7	operating	1973		GT	FO					Duke Energy Florida LLC [100.0%]	Duke Energy Corp [100.0%]	27.7581	-82.6353	exact	St. Petersburg	Pinellas		Florida	https://www.gem.wiki/Bayboro_power_station	L100000409200	G100000414305	US26441C2044	1	226.8	226.8	51	2013	2053	2093
oil/gas	United States	Americas	Northern America	Buck Steam Station	CC1			698	operating	2011		CC	NG/FO					Duke Energy Carolinas LLC [100.0%]	Duke Energy Corp [100.0%]	35.7133	-80.3767	exact	Salisbury	Rowan		North Carolina	https://www.gem.wiki/Buck_Steam_Station	L100000104073	G100000401655	US26441C2044	1	1068	1068	13	2051	2091	2131
oil/gas	United States	Americas	Northern America	Cayuga Generating Station	4			113	operating	1993		GT	FO/NG					Duke Energy Indiana LLC [100.0%]	Duke Energy Corp [100.0%]	39.9242	-87.4244	exact	Cayuga	Vermillion		Indiana	https://www.gem.wiki/Cayuga_Generating_Station	L100000103880	G100000402752	US26441C2044	1	1175	1175	31	2033	2073	2113
oil/gas	United States	Americas	Northern America	Crystal River Energy Complex	CC1		Citrus CC power station	985	operating	2018		CC	NG					Duke Energy Florida LLC [100.0%]	Duke Energy Corp [100.0%]	28.9656	-82.6977	exact	Crystal River	Citrus		Florida	https://www.gem.wiki/Crystal_River_Energy_Complex	L100000103825	G100000402124	US26441C2044	1	4412.7		6	2058	2098	2138
oil/gas	United States	Americas	Northern America	Crystal River Energy Complex	CC2		Citrus CC power station	985	operating	2018		CC	NG					Duke Energy Florida LLC [100.0%]	Duke Energy Corp [100.0%]	28.9656	-82.6977	exact	Crystal River	Citrus		Florida	https://www.gem.wiki/Crystal_River_Energy_Complex	L100000103825	G100000402125	US26441C2044	1	4412.7	4412.7	6	2058	2098	2138
oil/gas	United States	Americas	Northern America	Dan River Steam Station	CC1			698	operating	2012		CC	NG					Duke Energy Carolinas LLC [100.0%]	Duke Energy Corp [100.0%]	36.4862	-79.7208	exact	Eden	Rockingham		North Carolina	https://www.gem.wiki/Dan_River_Steam_Station	L100000104076	G100000401656	US26441C2044	1	988	988	12	2052	2092	2132
oil/gas	United States	Americas	Northern America	Darlington County power station	1			67	retired	1974	2020	GT	NG/FO					Duke Energy Progress LLC [100.0%]	Duke Energy Corp [100.0%]	34.4185	-80.1657	exact	Hartsville	Darlington		South Carolina	https://www.gem.wiki/Darlington_County_power_station	L100000401882	G100000402776	US26441C2044	1	846		50	2014	2054	2094
oil/gas	United States	Americas	Northern America	Darlington County power station	2			65.8	retired	1974	2020	GT	FO/WO					Duke Energy Progress - (NC) [100.0%]	Duke Energy Progress - (NC) [100.0%]	34.4185	-80.1657	exact	Hartsville	Darlington		South Carolina	https://www.gem.wiki/Darlington_County_power_station	L100000401882	G100000414286	US26441C2044	1	846		50	2014	2054	2094
oil/gas	United States	Americas	Northern America	Darlington County power station	3			67	retired	1974	2020	GT	NG/FO					Duke Energy Progress LLC [100.0%]	Duke Energy Corp [100.0%]	34.4185	-80.1657	exact	Hartsville	Darlington		South Carolina	https://www.gem.wiki/Darlington_County_power_station	L100000401882	G100000402779	US26441C2044	1	846		50	2014	2054	2094
oil/gas	United States	Americas	Northern America	Darlington County power station	4			65.8	retired	1974	2020	GT	FO/WO					Duke Energy Progress - (NC) [100.0%]	Duke Energy Progress - (NC) [100.0%]	34.4185	-80.1657	exact	Hartsville	Darlington		South Carolina	https://www.gem.wiki/Darlington_County_power_station	L100000401882	G100000414283	US26441C2044	1	846		50	2014	2054	2094
oil/gas	United States	Americas	Northern America	Darlington County power station	6			65.8	retired	1974	2020	GT	FO/WO					Duke Energy Progress - (NC) [100.0%]	Duke Energy Progress - (NC) [100.0%]	34.4185	-80.1657	exact	Hartsville	Darlington		South Carolina	https://www.gem.wiki/Darlington_County_power_station	L100000401882	G100000414285	US26441C2044	1	846		50	2014	2054	2094
oil/gas	United States	Americas	Northern America	Darlington County power station	8			65.8	retired	1974	2020	GT	FO/WO					Duke Energy Progress - (NC) [100.0%]	Duke Energy Progress - (NC) [100.0%]	34.4185	-80.1657	exact	Hartsville	Darlington		South Carolina	https://www.gem.wiki/Darlington_County_power_station	L100000401882	G100000414284	US26441C2044	1	846		50	2014	2054	2094
oil/gas	United States	Americas	Northern America	Darlington County power station	10			65.8	retired	1974	2020	GT	FO/WO					Duke Energy Progress - (NC) [100.0%]	Duke Energy Progress - (NC) [100.0%]	34.4185	-80.1657	exact	Hartsville	Darlington		South Carolina	https://www.gem.wiki/Darlington_County_power_station	L100000401882	G100000414287	US26441C2044	1	846		50	2014	2054	2094
oil/gas	United States	Americas	Northern America	Darlington County power station	7			67	retired	1975	2020	GT	NG/FO					Duke Energy Progress LLC [100.0%]	Duke Energy Corp [100.0%]	34.4185	-80.1657	exact	Hartsville	Darlington		South Carolina	https://www.gem.wiki/Darlington_County_power_station	L100000401882	G100000402780	US26441C2044	1	846		49	2015	2055	2095
oil/gas	United States	Americas	Northern America	Darlington County power station	12			158	operating	1997		GT	NG/FO					Duke Energy Progress LLC [100.0%]	Duke Energy Corp [100.0%]	34.4185	-80.1657	exact	Hartsville	Darlington		South Carolina	https://www.gem.wiki/Darlington_County_power_station	L100000401882	G100000402777	US26441C2044	1	846		27	2037	2077	2117
oil/gas	United States	Americas	Northern America	Darlington County power station	13			158	operating	1997		GT	NG/FO					Duke Energy Progress LLC [100.0%]	Duke Energy Corp [100.0%]	34.4185	-80.1657	exact	Hartsville	Darlington		South Carolina	https://www.gem.wiki/Darlington_County_power_station	L100000401882	G100000402778	US26441C2044	1	846	846	27	2037	2077	2117
oil/gas	United States	Americas	Northern America	DeBary power station	3			66.8	operating	1975		GT	FO					Duke Energy Florida LLC [100.0%]	Duke Energy Corp [100.0%]	28.9039	-81.3323	exact	DeBary	Volusia		Florida	https://www.gem.wiki/DeBary_power_station	L100000401867	G100000414280	US26441C2044	1	749.5		49	2015	2055	2095
oil/gas	United States	Americas	Northern America	DeBary power station	5			66.8	operating	1975		GT	FO					Duke Energy Florida LLC [100.0%]	Duke Energy Corp [100.0%]	28.9039	-81.3323	exact	DeBary	Volusia		Florida	https://www.gem.wiki/DeBary_power_station	L100000401867	G100000414278	US26441C2044	1	749.5		49	2015	2055	2095
oil/gas	United States	Americas	Northern America	DeBary power station	2			66.8	operating	1976		GT	FO					Duke Energy Florida LLC [100.0%]	Duke Energy Corp [100.0%]	28.9039	-81.3323	exact	DeBary	Volusia		Florida	https://www.gem.wiki/DeBary_power_station	L100000401867	G100000414281	US26441C2044	1	749.5		48	2016	2056	2096
oil/gas	United States	Americas	Northern America	DeBary power station	4			66.8	operating	1976		GT	FO					Duke Energy Florida LLC [100.0%]	Duke Energy Corp [100.0%]	28.9039	-81.3323	exact	DeBary	Volusia		Florida	https://www.gem.wiki/DeBary_power_station	L100000401867	G100000414279	US26441C2044	1	749.5		48	2016	2056	2096
oil/gas	United States	Americas	Northern America	DeBary power station	6			66.8	operating	1976		GT	FO					Duke Energy Florida LLC [100.0%]	Duke Energy Corp [100.0%]	28.9039	-81.3323	exact	DeBary	Volusia		Florida	https://www.gem.wiki/DeBary_power_station	L100000401867	G100000414277	US26441C2044	1	749.5		48	2016	2056	2096
oil/gas	United States	Americas	Northern America	DeBary power station	7			104	operating	1992		GT	NG/FO					Duke Energy Florida LLC [100.0%]	Duke Energy Corp [100.0%]	28.9039	-81.3323	exact	DeBary	Volusia		Florida	https://www.gem.wiki/DeBary_power_station	L100000401867	G100000402737	US26441C2044	1	749.5		32	2032	2072	2112
oil/gas	United States	Americas	Northern America	DeBary power station	8			104	operating	1992		GT	NG/FO					Duke Energy Florida LLC [100.0%]	Duke Energy Corp [100.0%]	28.9039	-81.3323	exact	DeBary	Volusia		Florida	https://www.gem.wiki/DeBary_power_station	L100000401867	G100000402738	US26441C2044	1	749.5		32	2032	2072	2112
oil/gas	United States	Americas	Northern America	DeBary power station	9			104	operating	1992		GT	NG/FO					Duke Energy Florida LLC [100.0%]	Duke Energy Corp [100.0%]	28.9039	-81.3323	exact	DeBary	Volusia		Florida	https://www.gem.wiki/DeBary_power_station	L100000401867	G100000402739	US26441C2044	1	749.5		32	2032	2072	2112
oil/gas	United States	Americas	Northern America	DeBary power station	10			103.5	operating	1992		GT	FO					Duke Energy Florida LLC [100.0%]	Duke Energy Corp [100.0%]	28.9039	-81.3323	exact	DeBary	Volusia		Florida	https://www.gem.wiki/DeBary_power_station	L100000401867	G100000414282	US26441C2044	1	749.5	749.5	32	2032	2072	2112
oil/gas	United States	Americas	Northern America	Henry County power station	1			61	operating	2001		GT	NG					Duke Energy Indiana LLC [100.0%]	Duke Energy Corp [100.0%]	39.9528	-85.5039	exact	New Castle	Henry		Indiana	https://www.gem.wiki/Henry_County_power_station	L100000401876	G100000402753	US26441C2044	1	183		23	2041	2081	2121
oil/gas	United States	Americas	Northern America	Henry County power station	2			61	operating	2001		GT	NG					Duke Energy Indiana LLC [100.0%]	Duke Energy Corp [100.0%]	39.9528	-85.5039	exact	New Castle	Henry		Indiana	https://www.gem.wiki/Henry_County_power_station	L100000401876	G100000402754	US26441C2044	1	183		23	2041	2081	2121
oil/gas	United States	Americas	Northern America	Henry County power station	3			61	operating	2001		GT	NG					Duke Energy Indiana LLC [100.0%]	Duke Energy Corp [100.0%]	39.9528	-85.5039	exact	New Castle	Henry		Indiana	https://www.gem.wiki/Henry_County_power_station	L100000401876	G100000402755	US26441C2044	1	183	183	23	2041	2081	2121
oil/gas	United States	Americas	Northern America	Hines energy complex	E100			547	operating	1999		CC	NG/FO					Duke Energy Florida LLC [100.0%]	Duke Energy Corp [100.0%]	27.7882	-81.87	exact	Bartow	Polk		Florida	https://www.gem.wiki/Hines_energy_complex	L100000401868	G100000402149	US26441C2044	1	2267		25	2039	2079	2119
oil/gas	United States	Americas	Northern America	Hines energy complex	F110			548	operating	2003		CC	NG/FO					Duke Energy Florida LLC [100.0%]	Duke Energy Corp [100.0%]	27.7882	-81.87	exact	Bartow	Polk		Florida	https://www.gem.wiki/Hines_energy_complex	L100000401868	G100000402150	US26441C2044	1	2267		21	2043	2083	2123
oil/gas	United States	Americas	Northern America	Hines energy complex	G301			561	operating	2005		CC	NG/FO					Duke Energy Florida LLC [100.0%]	Duke Energy Corp [100.0%]	27.7882	-81.87	exact	Bartow	Polk		Florida	https://www.gem.wiki/Hines_energy_complex	L100000401868	G100000402151	US26441C2044	1	2267		19	2045	2085	2125
oil/gas	United States	Americas	Northern America	Hines energy complex	H400			611	operating	2007		CC	NG/FO					Duke Energy Florida LLC [100.0%]	Duke Energy Corp [100.0%]	27.7882	-81.87	exact	Bartow	Polk		Florida	https://www.gem.wiki/Hines_energy_complex	L100000401868	G100000402152	US26441C2044	1	2267	2267	17	2047	2087	2127
oil/gas	United States	Americas	Northern America	Intercession City power station	P1			56.7	operating	1974		GT	FO					Duke Energy Florida LLC [100.0%]	Duke Energy Corp [100.0%]	28.2628	-81.5486	exact	Intercession City	Osceola		Florida	https://www.gem.wiki/Intercession_City_power_station	L100000401869	G100000414258	US26441C2044	1	1198.7		50	2014	2054	2094
oil/gas	United States	Americas	Northern America	Intercession City power station	P2			56.7	operating	1974		GT	FO					Duke Energy Florida LLC [100.0%]	Duke Energy Corp [100.0%]	28.2628	-81.5486	exact	Intercession City	Osceola		Florida	https://www.gem.wiki/Intercession_City_power_station	L100000401869	G100000414257	US26441C2044	1	1198.7		50	2014	2054	2094
oil/gas	United States	Americas	Northern America	Intercession City power station	P3			56.7	operating	1974		GT	FO					Duke Energy Florida LLC [100.0%]	Duke Energy Corp [100.0%]	28.2628	-81.5486	exact	Intercession City	Osceola		Florida	https://www.gem.wiki/Intercession_City_power_station	L100000401869	G100000414256	US26441C2044	1	1198.7		50	2014	2054	2094
oil/gas	United States	Americas	Northern America	Intercession City power station	P4			56.7	operating	1974		GT	FO					Duke Energy Florida LLC [100.0%]	Duke Energy Corp [100.0%]	28.2628	-81.5486	exact	Intercession City	Osceola		Florida	https://www.gem.wiki/Intercession_City_power_station	L100000401869	G100000414255	US26441C2044	1	1198.7		50	2014	2054	2094
oil/gas	United States	Americas	Northern America	Intercession City power station	P5			56.7	operating	1974		GT	FO					Duke Energy Florida LLC [100.0%]	Duke Energy Corp [100.0%]	28.2628	-81.5486	exact	Intercession City	Osceola		Florida	https://www.gem.wiki/Intercession_City_power_station	L100000401869	G100000414254	US26441C2044	1	1198.7		50	2014	2054	2094
oil/gas	United States	Americas	Northern America	Intercession City power station	P6			56.7	operating	1974		GT	FO					Duke Energy Florida LLC [100.0%]	Duke Energy Corp [100.0%]	28.2628	-81.5486	exact	Intercession City	Osceola		Florida	https://www.gem.wiki/Intercession_City_power_station	L100000401869	G100000414253	US26441C2044	1	1198.7		50	2014	2054	2094
oil/gas	United States	Americas	Northern America	Intercession City power station	P10			104	operating	1993		GT	NG/FO					Duke Energy Florida LLC [100.0%]	Duke Energy Corp [100.0%]	28.2628	-81.5486	exact	Intercession City	Osceola		Florida	https://www.gem.wiki/Intercession_City_power_station	L100000401869	G100000402740	US26441C2044	1	1198.7		31	2033	2073	2113
oil/gas	United States	Americas	Northern America	Intercession City power station	P7			104	operating	1993		GT	NG/FO					Duke Energy Florida LLC [100.0%]	Duke Energy Corp [100.0%]	28.2628	-81.5486	exact	Intercession City	Osceola		Florida	https://www.gem.wiki/Intercession_City_power_station	L100000401869	G100000402744	US26441C2044	1	1198.7		31	2033	2073	2113
oil/gas	United States	Americas	Northern America	Intercession City power station	P8			104	operating	1993		GT	NG/FO					Duke Energy Florida LLC [100.0%]	Duke Energy Corp [100.0%]	28.2628	-81.5486	exact	Intercession City	Osceola		Florida	https://www.gem.wiki/Intercession_City_power_station	L100000401869	G100000402745	US26441C2044	1	1198.7		31	2033	2073	2113
oil/gas	United States	Americas	Northern America	Intercession City power station	P9			104	operating	1993		GT	NG/FO					Duke Energy Florida LLC [100.0%]	Duke Energy Corp [100.0%]	28.2628	-81.5486	exact	Intercession City	Osceola		Florida	https://www.gem.wiki/Intercession_City_power_station	L100000401869	G100000402746	US26441C2044	1	1198.7		31	2033	2073	2113
oil/gas	United States	Americas	Northern America	Intercession City power station	P11			148.5	operating	1997		GT	FO					Duke Energy Florida LLC [66.7%]; Georgia Power Co [33.3%]	Duke Energy Corp [66.7%]; Southern Co [33.3%]	28.2628	-81.5486	exact	Intercession City	Osceola		Florida	https://www.gem.wiki/Intercession_City_power_station	L100000401869	G100000414252	US26441C2044	0.667	1198.7		27	2037	2077	2117
oil/gas	United States	Americas	Northern America	Intercession City power station	P12			98	operating	2000		GT	NG/FO					Duke Energy Florida LLC [100.0%]	Duke Energy Corp [100.0%]	28.2628	-81.5486	exact	Intercession City	Osceola		Florida	https://www.gem.wiki/Intercession_City_power_station	L100000401869	G100000402741	US26441C2044	1	1198.7		24	2040	2080	2120
oil/gas	United States	Americas	Northern America	Intercession City power station	P13			98	operating	2000		GT	NG/FO					Duke Energy Florida LLC [100.0%]	Duke Energy Corp [100.0%]	28.2628	-81.5486	exact	Intercession City	Osceola		Florida	https://www.gem.wiki/Intercession_City_power_station	L100000401869	G100000402742	US26441C2044	1	1198.7		24	2040	2080	2120
oil/gas	United States	Americas	Northern America	Intercession City power station	P14			98	operating	2000		GT	NG/FO					Duke Energy Florida LLC [100.0%]	Duke Energy Corp [100.0%]	28.2628	-81.5486	exact	Intercession City	Osceola		Florida	https://www.gem.wiki/Intercession_City_power_station	L100000401869	G100000402743	US26441C2044	1	1198.7	1198.7	24	2040	2080	2120
oil/gas	United States	Americas	Northern America	James E. Rogers Energy Complex	6			909.5	operating	2018		ST	NG/C					Duke Energy Carolinas LLC [100.0%]	Duke Energy Corp [100.0%]	35.22	-81.7594	exact	Cliffside	Cleveland		North Carolina	https://www.gem.wiki/James_E._Rogers_Energy_Complex	L100000104075	G100000101609	US26441C2044	1	1740.5	1740.5	6	2058	2098	2138
oil/gas	United States	Americas	Northern America	L V Sutton Combined Cycle power station	1			730	operating	2013		CC	NG/FO					Duke Energy Progress LLC [100.0%]	Duke Energy Corp [100.0%]	34.2831	-77.9853	exact	Wilmington	New Hanover		North Carolina	https://www.gem.wiki/L_V_Sutton_Combined_Cycle_power_station	L100000401883	G100000402067	US26441C2044	1	852		11	2053	2093	2133
oil/gas	United States	Americas	Northern America	L V Sutton Combined Cycle power station	CT004			61	operating	2017		GT	NG/FO					Duke Energy Progress LLC [100.0%]	Duke Energy Corp [100.0%]	34.2831	-77.9853	exact	Wilmington	New Hanover		North Carolina	https://www.gem.wiki/L_V_Sutton_Combined_Cycle_power_station	L100000401883	G100000402781	US26441C2044	1	852		7	2057	2097	2137
oil/gas	United States	Americas	Northern America	L V Sutton Combined Cycle power station	CT005			61	operating	2017		GT	NG/FO					Duke Energy Progress LLC [100.0%]	Duke Energy Corp [100.0%]	34.2831	-77.9853	exact	Wilmington	New Hanover		North Carolina	https://www.gem.wiki/L_V_Sutton_Combined_Cycle_power_station	L100000401883	G100000402782	US26441C2044	1	852	852	7	2057	2097	2137
oil/gas	United States	Americas	Northern America	Lee Steam Plant	CC1		Lee Combined Cycle Plant	1068	operating	2012		CC	NG/FO					Duke Energy Progress LLC [100.0%]	Duke Energy Corp [100.0%]	35.3736	-78.0894	exact	Goldsboro	Wayne		North Carolina	https://www.gem.wiki/Lee_Steam_Plant	L100000104080	G100000402060	US26441C2044	1	1500.5	1500.5	12	2052	2092	2132
oil/gas	United States	Americas	Northern America	Lincoln Combustion power station	1			110	operating	1995		GT	NG/FO					Duke Energy Carolinas LLC [100.0%]	Duke Energy Corp [100.0%]	35.4317	-81.0347	exact	Stanley	Lincoln		North Carolina	https://www.gem.wiki/Lincoln_Combustion_power_station	L100000401861	G100000402703	US26441C2044	1	2296		29	2035	2075	2115
oil/gas	United States	Americas	Northern America	Lincoln Combustion power station	2			110	operating	1995		GT	NG/FO					Duke Energy Carolinas LLC [100.0%]	Duke Energy Corp [100.0%]	35.4317	-81.0347	exact	Stanley	Lincoln		North Carolina	https://www.gem.wiki/Lincoln_Combustion_power_station	L100000401861	G100000402711	US26441C2044	1	2296		29	2035	2075	2115
oil/gas	United States	Americas	Northern America	Lincoln Combustion power station	3			110	operating	1995		GT	NG/FO					Duke Energy Carolinas LLC [100.0%]	Duke Energy Corp [100.0%]	35.4317	-81.0347	exact	Stanley	Lincoln		North Carolina	https://www.gem.wiki/Lincoln_Combustion_power_station	L100000401861	G100000402712	US26441C2044	1	2296		29	2035	2075	2115
oil/gas	United States	Americas	Northern America	Lincoln Combustion power station	4			110	operating	1995		GT	NG/FO					Duke Energy Carolinas LLC [100.0%]	Duke Energy Corp [100.0%]	35.4317	-81.0347	exact	Stanley	Lincoln		North Carolina	https://www.gem.wiki/Lincoln_Combustion_power_station	L100000401861	G100000402713	US26441C2044	1	2296		29	2035	2075	2115
oil/gas	United States	Americas	Northern America	Lincoln Combustion power station	5			110	operating	1995		GT	NG/FO					Duke Energy Carolinas LLC [100.0%]	Duke Energy Corp [100.0%]	35.4317	-81.0347	exact	Stanley	Lincoln		North Carolina	https://www.gem.wiki/Lincoln_Combustion_power_station	L100000401861	G100000402714	US26441C2044	1	2296		29	2035	2075	2115
oil/gas	United States	Americas	Northern America	Lincoln Combustion power station	6			110	operating	1995		GT	NG/FO					Duke Energy Carolinas LLC [100.0%]	Duke Energy Corp [100.0%]	35.4317	-81.0347	exact	Stanley	Lincoln		North Carolina	https://www.gem.wiki/Lincoln_Combustion_power_station	L100000401861	G100000402715	US26441C2044	1	2296		29	2035	2075	2115
oil/gas	United States	Americas	Northern America	Lincoln Combustion power station	7			110	operating	1995		GT	NG/FO					Duke Energy Carolinas LLC [100.0%]	Duke Energy Corp [100.0%]	35.4317	-81.0347	exact	Stanley	Lincoln		North Carolina	https://www.gem.wiki/Lincoln_Combustion_power_station	L100000401861	G100000402716	US26441C2044	1	2296		29	2035	2075	2115
oil/gas	United States	Americas	Northern America	Lincoln Combustion power station	8			110	operating	1995		GT	NG/FO					Duke Energy Carolinas LLC [100.0%]	Duke Energy Corp [100.0%]	35.4317	-81.0347	exact	Stanley	Lincoln		North Carolina	https://www.gem.wiki/Lincoln_Combustion_power_station	L100000401861	G100000402717	US26441C2044	1	2296		29	2035	2075	2115
oil/gas	United States	Americas	Northern America	Lincoln Combustion power station	9			110	operating	1995		GT	NG/FO					Duke Energy Carolinas LLC [100.0%]	Duke Energy Corp [100.0%]	35.4317	-81.0347	exact	Stanley	Lincoln		North Carolina	https://www.gem.wiki/Lincoln_Combustion_power_station	L100000401861	G100000402718	US26441C2044	1	2296		29	2035	2075	2115
oil/gas	United States	Americas	Northern America	Lincoln Combustion power station	10			110	operating	1995		GT	NG/FO					Duke Energy Carolinas LLC [100.0%]	Duke Energy Corp [100.0%]	35.4317	-81.0347	exact	Stanley	Lincoln		North Carolina	https://www.gem.wiki/Lincoln_Combustion_power_station	L100000401861	G100000402704	US26441C2044	1	2296		29	2035	2075	2115
oil/gas	United States	Americas	Northern America	Lincoln Combustion power station	11			110	operating	1995		GT	NG/FO					Duke Energy Carolinas LLC [100.0%]	Duke Energy Corp [100.0%]	35.4317	-81.0347	exact	Stanley	Lincoln		North Carolina	https://www.gem.wiki/Lincoln_Combustion_power_station	L100000401861	G100000402705	US26441C2044	1	2296		29	2035	2075	2115
oil/gas	United States	Americas	Northern America	Lincoln Combustion power station	12			110	operating	1995		GT	NG/FO					Duke Energy Carolinas LLC [100.0%]	Duke Energy Corp [100.0%]	35.4317	-81.0347	exact	Stanley	Lincoln		North Carolina	https://www.gem.wiki/Lincoln_Combustion_power_station	L100000401861	G100000402706	US26441C2044	1	2296		29	2035	2075	2115
oil/gas	United States	Americas	Northern America	Lincoln Combustion power station	13			110	operating	1996		GT	NG/FO					Duke Energy Carolinas LLC [100.0%]	Duke Energy Corp [100.0%]	35.4317	-81.0347	exact	Stanley	Lincoln		North Carolina	https://www.gem.wiki/Lincoln_Combustion_power_station	L100000401861	G100000402707	US26441C2044	1	2296		28	2036	2076	2116
oil/gas	United States	Americas	Northern America	Lincoln Combustion power station	14			110	operating	1996		GT	NG/FO					Duke Energy Carolinas LLC [100.0%]	Duke Energy Corp [100.0%]	35.4317	-81.0347	exact	Stanley	Lincoln		North Carolina	https://www.gem.wiki/Lincoln_Combustion_power_station	L100000401861	G100000402708	US26441C2044	1	2296		28	2036	2076	2116
oil/gas	United States	Americas	Northern America	Lincoln Combustion power station	15			110	operating	1996		GT	NG/FO					Duke Energy Carolinas LLC [100.0%]	Duke Energy Corp [100.0%]	35.4317	-81.0347	exact	Stanley	Lincoln		North Carolina	https://www.gem.wiki/Lincoln_Combustion_power_station	L100000401861	G100000402709	US26441C2044	1	2296		28	2036	2076	2116
oil/gas	United States	Americas	Northern America	Lincoln Combustion power station	16			110	operating	1996		GT	NG/FO					Duke Energy Carolinas LLC [100.0%]	Duke Energy Corp [100.0%]	35.4317	-81.0347	exact	Stanley	Lincoln		North Carolina	https://www.gem.wiki/Lincoln_Combustion_power_station	L100000401861	G100000402710	US26441C2044	1	2296		28	2036	2076	2116
oil/gas	United States	Americas	Northern America	Lincoln Combustion power station	17			536	construction	2024		GT	NG/FO					Duke Energy Carolinas LLC [100.0%]	Duke Energy Corp [100.0%]	35.4317	-81.0347	exact	Stanley	Lincoln		North Carolina	https://www.gem.wiki/Lincoln_Combustion_power_station	L100000401861	G100000409461	US26441C2044	1	2296	2296	0	2064	2104	2144
oil/gas	United States	Americas	Northern America	Madison power station	CT1			87	operating	2000		GT	NG					Duke Energy Indiana LLC [100.0%]	Duke Energy Corp [100.0%]	39.4522	-84.4647	exact	Trenton	Butler		Ohio	https://www.gem.wiki/Madison_power_station	L100000401877	G100000402756	US26441C2044	1	696		24	2040	2080	2120
oil/gas	United States	Americas	Northern America	Madison power station	CT2			87	operating	2000		GT	NG					Duke Energy Indiana LLC [100.0%]	Duke Energy Corp [100.0%]	39.4522	-84.4647	exact	Trenton	Butler		Ohio	https://www.gem.wiki/Madison_power_station	L100000401877	G100000402757	US26441C2044	1	696		24	2040	2080	2120
oil/gas	United States	Americas	Northern America	Madison power station	CT3			87	operating	2000		GT	NG					Duke Energy Indiana LLC [100.0%]	Duke Energy Corp [100.0%]	39.4522	-84.4647	exact	Trenton	Butler		Ohio	https://www.gem.wiki/Madison_power_station	L100000401877	G100000402758	US26441C2044	1	696		24	2040	2080	2120
oil/gas	United States	Americas	Northern America	Madison power station	CT4			87	operating	2000		GT	NG					Duke Energy Indiana LLC [100.0%]	Duke Energy Corp [100.0%]	39.4522	-84.4647	exact	Trenton	Butler		Ohio	https://www.gem.wiki/Madison_power_station	L100000401877	G100000402759	US26441C2044	1	696		24	2040	2080	2120
oil/gas	United States	Americas	Northern America	Madison power station	CT5			87	operating	2000		GT	NG					Duke Energy Indiana LLC [100.0%]	Duke Energy Corp [100.0%]	39.4522	-84.4647	exact	Trenton	Butler		Ohio	https://www.gem.wiki/Madison_power_station	L100000401877	G100000402760	US26441C2044	1	696		24	2040	2080	2120
oil/gas	United States	Americas	Northern America	Madison power station	CT6			87	operating	2000		GT	NG					Duke Energy Indiana LLC [100.0%]	Duke Energy Corp [100.0%]	39.4522	-84.4647	exact	Trenton	Butler		Ohio	https://www.gem.wiki/Madison_power_station	L100000401877	G100000402761	US26441C2044	1	696		24	2040	2080	2120
oil/gas	United States	Americas	Northern America	Madison power station	CT7			87	operating	2000		GT	NG					Duke Energy Indiana LLC [100.0%]	Duke Energy Corp [100.0%]	39.4522	-84.4647	exact	Trenton	Butler		Ohio	https://www.gem.wiki/Madison_power_station	L100000401877	G100000402762	US26441C2044	1	696		24	2040	2080	2120
oil/gas	United States	Americas	Northern America	Madison power station	CT8			87	operating	2000		GT	NG					Duke Energy Indiana LLC [100.0%]	Duke Energy Corp [100.0%]	39.4522	-84.4647	exact	Trenton	Butler		Ohio	https://www.gem.wiki/Madison_power_station	L100000401877	G100000402763	US26441C2044	1	696	696	24	2040	2080	2120
oil/gas	United States	Americas	Northern America	Mill Creek (SC) power station	1			100	operating	2002		GT	NG/FO					Duke Energy Carolinas LLC [100.0%]	Duke Energy Corp [100.0%]	35.1597	-81.4306	exact	Blacksburg	Cherokee		South Carolina	https://www.gem.wiki/Mill_Creek_(SC)_power_station	L100000401862	G100000402719	US26441C2044	1	800		22	2042	2082	2122
oil/gas	United States	Americas	Northern America	Mill Creek (SC) power station	2			100	operating	2002		GT	NG/FO					Duke Energy Carolinas LLC [100.0%]	Duke Energy Corp [100.0%]	35.1597	-81.4306	exact	Blacksburg	Cherokee		South Carolina	https://www.gem.wiki/Mill_Creek_(SC)_power_station	L100000401862	G100000402720	US26441C2044	1	800		22	2042	2082	2122
oil/gas	United States	Americas	Northern America	Mill Creek (SC) power station	3			100	operating	2002		GT	NG/FO					Duke Energy Carolinas LLC [100.0%]	Duke Energy Corp [100.0%]	35.1597	-81.4306	exact	Blacksburg	Cherokee		South Carolina	https://www.gem.wiki/Mill_Creek_(SC)_power_station	L100000401862	G100000402721	US26441C2044	1	800		22	2042	2082	2122
oil/gas	United States	Americas	Northern America	Mill Creek (SC) power station	4			100	operating	2002		GT	NG/FO					Duke Energy Carolinas LLC [100.0%]	Duke Energy Corp [100.0%]	35.1597	-81.4306	exact	Blacksburg	Cherokee		South Carolina	https://www.gem.wiki/Mill_Creek_(SC)_power_station	L100000401862	G100000402722	US26441C2044	1	800		22	2042	2082	2122
oil/gas	United States	Americas	Northern America	Mill Creek (SC) power station	5			100	operating	2003		GT	NG/FO					Duke Energy Carolinas LLC [100.0%]	Duke Energy Corp [100.0%]	35.1597	-81.4306	exact	Blacksburg	Cherokee		South Carolina	https://www.gem.wiki/Mill_Creek_(SC)_power_station	L100000401862	G100000402723	US26441C2044	1	800		21	2043	2083	2123
oil/gas	United States	Americas	Northern America	Mill Creek (SC) power station	6			100	operating	2003		GT	NG/FO					Duke Energy Carolinas LLC [100.0%]	Duke Energy Corp [100.0%]	35.1597	-81.4306	exact	Blacksburg	Cherokee		South Carolina	https://www.gem.wiki/Mill_Creek_(SC)_power_station	L100000401862	G100000402724	US26441C2044	1	800		21	2043	2083	2123
oil/gas	United States	Americas	Northern America	Mill Creek (SC) power station	7			100	operating	2003		GT	NG/FO					Duke Energy Carolinas LLC [100.0%]	Duke Energy Corp [100.0%]	35.1597	-81.4306	exact	Blacksburg	Cherokee		South Carolina	https://www.gem.wiki/Mill_Creek_(SC)_power_station	L100000401862	G100000402725	US26441C2044	1	800		21	2043	2083	2123
oil/gas	United States	Americas	Northern America	Mill Creek (SC) power station	8			100	operating	2003		GT	NG/FO					Duke Energy Carolinas LLC [100.0%]	Duke Energy Corp [100.0%]	35.1597	-81.4306	exact	Blacksburg	Cherokee		South Carolina	https://www.gem.wiki/Mill_Creek_(SC)_power_station	L100000401862	G100000402726	US26441C2044	1	800	800	21	2043	2083	2123
oil/gas	United States	Americas	Northern America	Noblesville power station	CC1			283	operating	2003		CC	NG					Duke Energy Indiana LLC [100.0%]	Duke Energy Corp [100.0%]	40.0969	-85.9714	exact	Noblesville	Hamilton		Indiana	https://www.gem.wiki/Noblesville_power_station	L100000401878	G100000401582	US26441C2044	1	283	283	21	2043	2083	2123
oil/gas	United States	Americas	Northern America	Osprey energy center power plant	COEC			644	operating	2004		CC	NG					Duke Energy Florida LLC [100.0%]	Duke Energy Corp [100.0%]	28.0525	-81.8083	exact	Auburndale	Polk		Florida	https://www.gem.wiki/Osprey_energy_center_power_plant	L100000401870	G100000401919	US26441C2044	1	644	644	20	2044	2084	2124
oil/gas	United States	Americas	Northern America	P L Bartow power station	P1			55.4	operating	1972		GT	FO					Duke Energy Florida LLC [100.0%]	Duke Energy Corp [100.0%]	27.8595	-82.6018	exact	St. Petersburg	Pinellas		Florida	https://www.gem.wiki/P_L_Bartow_power_station	L100000401871	G100000414219	US26441C2044	1	1474.8		52	2012	2052	2092
oil/gas	United States	Americas	Northern America	P L Bartow power station	P2			55	operating	1972		GT	NG/FO					Duke Energy Florida LLC [100.0%]	Duke Energy Corp [100.0%]	27.8595	-82.6018	exact	St. Petersburg	Pinellas		Florida	https://www.gem.wiki/P_L_Bartow_power_station	L100000401871	G100000402747	US26441C2044	1	1474.8		52	2012	2052	2092
oil/gas	United States	Americas	Northern America	P L Bartow power station	P3			55.4	operating	1972		GT	FO					Duke Energy Florida LLC [100.0%]	Duke Energy Corp [100.0%]	27.8595	-82.6018	exact	St. Petersburg	Pinellas		Florida	https://www.gem.wiki/P_L_Bartow_power_station	L100000401871	G100000414218	US26441C2044	1	1474.8		52	2012	2052	2092
oil/gas	United States	Americas	Northern America	P L Bartow power station	P4			55	operating	1972		GT	NG/FO					Duke Energy Florida LLC [100.0%]	Duke Energy Corp [100.0%]	27.8595	-82.6018	exact	St. Petersburg	Pinellas		Florida	https://www.gem.wiki/P_L_Bartow_power_station	L100000401871	G100000402748	US26441C2044	1	1474.8		52	2012	2052	2092
oil/gas	United States	Americas	Northern America	P L Bartow power station	G981			1254	operating	2009		CC	NG/FO					Duke Energy Florida LLC [100.0%]	Duke Energy Corp [100.0%]	27.8595	-82.6018	exact	St. Petersburg	Pinellas		Florida	https://www.gem.wiki/P_L_Bartow_power_station	L100000401871	G100000402127	US26441C2044	1	1474.8	1474.8	15	2049	2089	2129
oil/gas	United States	Americas	Northern America	Rockingham County CT Station	CT1			196	mothballed	2000		GT	NG/FO					Duke Energy Carolinas LLC [100.0%]	Duke Energy Corp [100.0%]	36.3297	-79.8297	exact	Reidsville	Rockingham		North Carolina	https://www.gem.wiki/Rockingham_County_CT_Station	L100000401863	G100000402727	US26441C2044	1	980		24	2040	2080	2120
oil/gas	United States	Americas	Northern America	Rockingham County CT Station	CT2			196	mothballed	2000		GT	NG/FO					Duke Energy Carolinas LLC [100.0%]	Duke Energy Corp [100.0%]	36.3297	-79.8297	exact	Reidsville	Rockingham		North Carolina	https://www.gem.wiki/Rockingham_County_CT_Station	L100000401863	G100000402728	US26441C2044	1	980		24	2040	2080	2120
oil/gas	United States	Americas	Northern America	Rockingham County CT Station	CT3			196	mothballed	2000		GT	NG/FO					Duke Energy Carolinas LLC [100.0%]	Duke Energy Corp [100.0%]	36.3297	-79.8297	exact	Reidsville	Rockingham		North Carolina	https://www.gem.wiki/Rockingham_County_CT_Station	L100000401863	G100000402729	US26441C2044	1	980		24	2040	2080	2120
oil/gas	United States	Americas	Northern America	Rockingham County CT Station	CT4			196	mothballed	2000		GT	NG/FO					Duke Energy Carolinas LLC [100.0%]	Duke Energy Corp [100.0%]	36.3297	-79.8297	exact	Reidsville	Rockingham		North Carolina	https://www.gem.wiki/Rockingham_County_CT_Station	L100000401863	G100000402730	US26441C2044	1	980		24	2040	2080	2120
oil/gas	United States	Americas	Northern America	Rockingham County CT Station	CT5			196	mothballed	2000		GT	NG/FO					Duke Energy Carolinas LLC [100.0%]	Duke Energy Corp [100.0%]	36.3297	-79.8297	exact	Reidsville	Rockingham		North Carolina	https://www.gem.wiki/Rockingham_County_CT_Station	L100000401863	G100000402731	US26441C2044	1	980	980	24	2040	2080	2120
oil/gas	United States	Americas	Northern America	Sherwood H Smith Jr energy complex	1			199	operating	2001		GT	FO/NG					Duke Energy Progress LLC [100.0%]	Duke Energy Corp [100.0%]	34.8392	-79.7406	exact	Hamlet	Richmond		North Carolina	https://www.gem.wiki/Sherwood_H_Smith_Jr_energy_complex	L100000401885	G100000402783	US26441C2044	1	2243		23	2041	2081	2121
oil/gas	United States	Americas	Northern America	Sherwood H Smith Jr energy complex	2			199	operating	2001		GT	FO/NG					Duke Energy Progress LLC [100.0%]	Duke Energy Corp [100.0%]	34.8392	-79.7406	exact	Hamlet	Richmond		North Carolina	https://www.gem.wiki/Sherwood_H_Smith_Jr_energy_complex	L100000401885	G100000402784	US26441C2044	1	2243		23	2041	2081	2121
oil/gas	United States	Americas	Northern America	Sherwood H Smith Jr energy complex	3			199	operating	2001		GT	FO/NG					Duke Energy Progress LLC [100.0%]	Duke Energy Corp [100.0%]	34.8392	-79.7406	exact	Hamlet	Richmond		North Carolina	https://www.gem.wiki/Sherwood_H_Smith_Jr_energy_complex	L100000401885	G100000402785	US26441C2044	1	2243		23	2041	2081	2121
oil/gas	United States	Americas	Northern America	Sherwood H Smith Jr energy complex	4			199	operating	2001		GT	FO/NG					Duke Energy Progress LLC [100.0%]	Duke Energy Corp [100.0%]	34.8392	-79.7406	exact	Hamlet	Richmond		North Carolina	https://www.gem.wiki/Sherwood_H_Smith_Jr_energy_complex	L100000401885	G100000402786	US26441C2044	1	2243		23	2041	2081	2121
oil/gas	United States	Americas	Northern America	Sherwood H Smith Jr energy complex	6			199	operating	2002		GT	NG/FO					Duke Energy Progress LLC [100.0%]	Duke Energy Corp [100.0%]	34.8392	-79.7406	exact	Hamlet	Richmond		North Carolina	https://www.gem.wiki/Sherwood_H_Smith_Jr_energy_complex	L100000401885	G100000402787	US26441C2044	1	2243		22	2042	2082	2122
oil/gas	United States	Americas	Northern America	Sherwood H Smith Jr energy complex	CC1			594	operating	2002		CC	NG/FO					Duke Energy Progress LLC [100.0%]	Duke Energy Corp [100.0%]	34.8392	-79.7406	exact	Hamlet	Richmond		North Carolina	https://www.gem.wiki/Sherwood_H_Smith_Jr_energy_complex	L100000401885	G100000402172	US26441C2044	1	2243		22	2042	2082	2122
oil/gas	United States	Americas	Northern America	Sherwood H Smith Jr energy complex	CC2			654	operating	2011		CC	NG/FO					Duke Energy Progress LLC [100.0%]	Duke Energy Corp [100.0%]	34.8392	-79.7406	exact	Hamlet	Richmond		North Carolina	https://www.gem.wiki/Sherwood_H_Smith_Jr_energy_complex	L100000401885	G100000402173	US26441C2044	1	2243	2243	13	2051	2091	2131
oil/gas	United States	Americas	Northern America	Suwannee River power station	P1			66	operating	1980		GT	NG/FO					Duke Energy Florida LLC [100.0%]	Duke Energy Corp [100.0%]	30.3764	-83.1806	exact	Live Oak	Suwannee		Florida	https://www.gem.wiki/Suwannee_River_power_station	L100000401872	G100000402749	US26441C2044	1	197.9		44	2020	2060	2100
oil/gas	United States	Americas	Northern America	Suwannee River power station	P2			65.9	operating	1980		GT	FO					Duke Energy Florida LLC [100.0%]	Duke Energy Corp [100.0%]	30.3764	-83.1806	exact	Live Oak	Suwannee		Florida	https://www.gem.wiki/Suwannee_River_power_station	L100000401872	G100000414184	US26441C2044	1	197.9		44	2020	2060	2100
oil/gas	United States	Americas	Northern America	Suwannee River power station	P3			66	operating	1980		GT	NG/FO					Duke Energy Florida LLC [100.0%]	Duke Energy Corp [100.0%]	30.3764	-83.1806	exact	Live Oak	Suwannee		Florida	https://www.gem.wiki/Suwannee_River_power_station	L100000401872	G100000402750	US26441C2044	1	197.9	197.9	44	2020	2060	2100
oil/gas	United States	Americas	Northern America	Tiger Bay power station	G200			278	operating	1997		CC	NG					Duke Energy Florida LLC [100.0%]	Duke Energy Corp [100.0%]	27.7464	-81.8495	exact	Ft. Meade	Polk		Florida	https://www.gem.wiki/Tiger_Bay_power_station	L100000401873	G100000402164	US26441C2044	1	278	278	27	2037	2077	2117
oil/gas	United States	Americas	Northern America	University of Florida power station	P1			54	operating	1994		GT	NG					Duke Energy Florida LLC [100.0%]	Duke Energy Corp [100.0%]	29.6403	-82.3486	exact	Gainesville	Alachua		Florida	https://www.gem.wiki/University_of_Florida_power_station	L100000401874	G100000402751	US26441C2044	1	54	54	30	2034	2074	2114
oil/gas	United States	Americas	Northern America	Vermillion energy facility	CT1			87	operating	2000		GT	NG					Duke Energy Indiana LLC [62.5%]; Wabash Valley Power Association Inc [37.5%]	Duke Energy Corp [62.5%]	39.9223	-87.4464	exact	Cayuga	Vermillion		Indiana	https://www.gem.wiki/Vermillion_energy_facility	L100000401550	G100000402247	US26441C2044	0.625	696		24	2040	2080	2120
oil/gas	United States	Americas	Northern America	Vermillion energy facility	CT2			87	operating	2000		GT	NG					Duke Energy Indiana LLC [62.5%]; Wabash Valley Power Association Inc [37.5%]	Duke Energy Corp [62.5%]	39.9223	-87.4464	exact	Cayuga	Vermillion		Indiana	https://www.gem.wiki/Vermillion_energy_facility	L100000401550	G100000402248	US26441C2044	0.625	696		24	2040	2080	2120
oil/gas	United States	Americas	Northern America	Vermillion energy facility	CT3			87	operating	2000		GT	NG					Duke Energy Indiana LLC [62.5%]; Wabash Valley Power Association Inc [37.5%]	Duke Energy Corp [62.5%]	39.9223	-87.4464	exact	Cayuga	Vermillion		Indiana	https://www.gem.wiki/Vermillion_energy_facility	L100000401550	G100000402249	US26441C2044	0.625	696		24	2040	2080	2120
oil/gas	United States	Americas	Northern America	Vermillion energy facility	CT4			87	operating	2000		GT	NG					Duke Energy Indiana LLC [62.5%]; Wabash Valley Power Association Inc [37.5%]	Duke Energy Corp [62.5%]	39.9223	-87.4464	exact	Cayuga	Vermillion		Indiana	https://www.gem.wiki/Vermillion_energy_facility	L100000401550	G100000402250	US26441C2044	0.625	696		24	2040	2080	2120
oil/gas	United States	Americas	Northern America	Vermillion energy facility	CT5			87	operating	2000		GT	NG					Duke Energy Indiana LLC [62.5%]; Wabash Valley Power Association Inc [37.5%]	Duke Energy Corp [62.5%]	39.9223	-87.4464	exact	Cayuga	Vermillion		Indiana	https://www.gem.wiki/Vermillion_energy_facility	L100000401550	G100000402251	US26441C2044	0.625	696		24	2040	2080	2120
oil/gas	United States	Americas	Northern America	Vermillion energy facility	CT6			87	operating	2000		GT	NG					Duke Energy Indiana LLC [62.5%]; Wabash Valley Power Association Inc [37.5%]	Duke Energy Corp [62.5%]	39.9223	-87.4464	exact	Cayuga	Vermillion		Indiana	https://www.gem.wiki/Vermillion_energy_facility	L100000401550	G100000402252	US26441C2044	0.625	696		24	2040	2080	2120
oil/gas	United States	Americas	Northern America	Vermillion energy facility	CT7			87	operating	2000		GT	NG					Duke Energy Indiana LLC [62.5%]; Wabash Valley Power Association Inc [37.5%]	Duke Energy Corp [62.5%]	39.9223	-87.4464	exact	Cayuga	Vermillion		Indiana	https://www.gem.wiki/Vermillion_energy_facility	L100000401550	G100000402253	US26441C2044	0.625	696		24	2040	2080	2120
oil/gas	United States	Americas	Northern America	Vermillion energy facility	CT8			87	operating	2000		GT	NG					Duke Energy Indiana LLC [62.5%]; Wabash Valley Power Association Inc [37.5%]	Duke Energy Corp [62.5%]	39.9223	-87.4464	exact	Cayuga	Vermillion		Indiana	https://www.gem.wiki/Vermillion_energy_facility	L100000401550	G100000402254	US26441C2044	0.625	696	696	24	2040	2080	2120
oil/gas	United States	Americas	Northern America	W.S. Lee Steam Station	3			163	retired	1958	2022	ST	NG					Duke Energy Carolinas LLC [100.0%]	Duke Energy Corp [100.0%]	34.6022	-82.435	exact	Williamston	Anderson		South Carolina	https://www.gem.wiki/W.S._Lee_Steam_Station	L100000104179	G100000402732	US26441C2044	1	1473		66	1998	2038	2078
oil/gas	United States	Americas	Northern America	W.S. Lee Steam Station	7			54	operating	2007		GT	NG/FO					Duke Energy Carolinas LLC [100.0%]	Duke Energy Corp [100.0%]	34.6022	-82.435	exact	Williamston	Anderson		South Carolina	https://www.gem.wiki/W.S._Lee_Steam_Station	L100000104179	G100000402733	US26441C2044	1	1473		17	2047	2087	2127
oil/gas	United States	Americas	Northern America	W.S. Lee Steam Station	8			54	operating	2007		GT	NG/FO					Duke Energy Carolinas LLC [100.0%]	Duke Energy Corp [100.0%]	34.6022	-82.435	exact	Williamston	Anderson		South Carolina	https://www.gem.wiki/W.S._Lee_Steam_Station	L100000104179	G100000402734	US26441C2044	1	1473		17	2047	2087	2127
oil/gas	United States	Americas	Northern America	W.S. Lee Steam Station	CC1			847	operating	2018		CC	NG					Duke Energy Carolinas LLC [100.0%]	Duke Energy Corp [100.0%]	34.6022	-82.435	exact	Williamston	Anderson		South Carolina	https://www.gem.wiki/W.S._Lee_Steam_Station	L100000104179	G100000401663	US26441C2044	1	1473	1473	6	2058	2098	2138
oil/gas	United States	Americas	Northern America	Wayne County power station	1			195	operating	2000		GT	NG/FO					Duke Energy Progress LLC [100.0%]	Duke Energy Corp [100.0%]	35.3758	-78.0981	exact	Goldsboro	Wayne		North Carolina	https://www.gem.wiki/Wayne_County_power_station	L100000401886	G100000402788	US26441C2044	1	979		24	2040	2080	2120
oil/gas	United States	Americas	Northern America	Wayne County power station	2			195	operating	2000		GT	NG/FO					Duke Energy Progress LLC [100.0%]	Duke Energy Corp [100.0%]	35.3758	-78.0981	exact	Goldsboro	Wayne		North Carolina	https://www.gem.wiki/Wayne_County_power_station	L100000401886	G100000402789	US26441C2044	1	979		24	2040	2080	2120
oil/gas	United States	Americas	Northern America	Wayne County power station	3			195	operating	2000		GT	NG/FO					Duke Energy Progress LLC [100.0%]	Duke Energy Corp [100.0%]	35.3758	-78.0981	exact	Goldsboro	Wayne		North Carolina	https://www.gem.wiki/Wayne_County_power_station	L100000401886	G100000402790	US26441C2044	1	979		24	2040	2080	2120
oil/gas	United States	Americas	Northern America	Wayne County power station	4			195	operating	2000		GT	NG/FO					Duke Energy Progress LLC [100.0%]	Duke Energy Corp [100.0%]	35.3758	-78.0981	exact	Goldsboro	Wayne		North Carolina	https://www.gem.wiki/Wayne_County_power_station	L100000401886	G100000402791	US26441C2044	1	979		24	2040	2080	2120
oil/gas	United States	Americas	Northern America	Wayne County power station	5			199	operating	2009		GT	NG/FO					Duke Energy Progress LLC [100.0%]	Duke Energy Corp [100.0%]	35.3758	-78.0981	exact	Goldsboro	Wayne		North Carolina	https://www.gem.wiki/Wayne_County_power_station	L100000401886	G100000402792	US26441C2044	1	979	979	15	2049	2089	2129
oil/gas	United States	Americas	Northern America	Wheatland generating facility	CTG1			125	operating	2000		GT	NG					Duke Energy Indiana LLC [100.0%]	Duke Energy Corp [100.0%]	38.6716	-87.2931	exact	Wheatland	Knox		Indiana	https://www.gem.wiki/Wheatland_generating_facility	L100000401879	G100000402764	US26441C2044	1	500		24	2040	2080	2120
oil/gas	United States	Americas	Northern America	Wheatland generating facility	CTG2			125	operating	2000		GT	NG					Duke Energy Indiana LLC [100.0%]	Duke Energy Corp [100.0%]	38.6716	-87.2931	exact	Wheatland	Knox		Indiana	https://www.gem.wiki/Wheatland_generating_facility	L100000401879	G100000402765	US26441C2044	1	500		24	2040	2080	2120
oil/gas	United States	Americas	Northern America	Wheatland generating facility	CTG3			125	operating	2000		GT	NG					Duke Energy Indiana LLC [100.0%]	Duke Energy Corp [100.0%]	38.6716	-87.2931	exact	Wheatland	Knox		Indiana	https://www.gem.wiki/Wheatland_generating_facility	L100000401879	G100000402766	US26441C2044	1	500		24	2040	2080	2120
oil/gas	United States	Americas	Northern America	Wheatland generating facility	CTG4			125	operating	2000		GT	NG					Duke Energy Indiana LLC [100.0%]	Duke Energy Corp [100.0%]	38.6716	-87.2931	exact	Wheatland	Knox		Indiana	https://www.gem.wiki/Wheatland_generating_facility	L100000401879	G100000402767	US26441C2044	1	500	500	24	2040	2080	2120
oil/gas	United States	Americas	Northern America	Woodsdale power station	GT2			95	operating	1992		GT	NG/FO					Duke Energy Kentucky Inc [100.0%]	Duke Energy Corp [100.0%]	39.4492	-84.4611	exact	Trenton	Butler		Ohio	https://www.gem.wiki/Woodsdale_power_station	L100000401880	G100000402769	US26441C2044	1	570		32	2032	2072	2112
oil/gas	United States	Americas	Northern America	Woodsdale power station	GT3			95	operating	1992		GT	NG/FO					Duke Energy Kentucky Inc [100.0%]	Duke Energy Corp [100.0%]	39.4492	-84.4611	exact	Trenton	Butler		Ohio	https://www.gem.wiki/Woodsdale_power_station	L100000401880	G100000402770	US26441C2044	1	570		32	2032	2072	2112
oil/gas	United States	Americas	Northern America	Woodsdale power station	GT4			95	operating	1992		GT	NG/FO					Duke Energy Kentucky Inc [100.0%]	Duke Energy Corp [100.0%]	39.4492	-84.4611	exact	Trenton	Butler		Ohio	https://www.gem.wiki/Woodsdale_power_station	L100000401880	G100000402771	US26441C2044	1	570		32	2032	2072	2112
oil/gas	United States	Americas	Northern America	Woodsdale power station	GT5			95	operating	1992		GT	NG/FO					Duke Energy Kentucky Inc [100.0%]	Duke Energy Corp [100.0%]	39.4492	-84.4611	exact	Trenton	Butler		Ohio	https://www.gem.wiki/Woodsdale_power_station	L100000401880	G100000402772	US26441C2044	1	570		32	2032	2072	2112
oil/gas	United States	Americas	Northern America	Woodsdale power station	GT6			95	operating	1992		GT	NG/FO					Duke Energy Kentucky Inc [100.0%]	Duke Energy Corp [100.0%]	39.4492	-84.4611	exact	Trenton	Butler		Ohio	https://www.gem.wiki/Woodsdale_power_station	L100000401880	G100000402773	US26441C2044	1	570		32	2032	2072	2112
oil/gas	United States	Americas	Northern America	Woodsdale power station	GT1			95	operating	1993		GT	NG/FO					Duke Energy Kentucky Inc [100.0%]	Duke Energy Corp [100.0%]	39.4492	-84.4611	exact	Trenton	Butler		Ohio	https://www.gem.wiki/Woodsdale_power_station	L100000401880	G100000402768	US26441C2044	1	570	570	31	2033	2073	2113
solar	United States	Americas	Northern America	Bay Ranch Solar Power Plant				75	operating	2023		PV						Duke Energy CORP		30.1648	-85.4918	exact		Bay County		Florida	https://gem.wiki/Bay_Ranch_Solar_Power_Plant	L808387	G810578	US26441C2044	1	75		1	2063	2103	2143
solar	United States	Americas	Northern America	Bay Trail Solar Power Plant				75	operating	2022		PV						Duke Energy CORP		28.9999	-82.6722	exact	Crystal River	Citrus County		Florida	https://gem.wiki/Bay_Trail_Solar_Power_Plant	L804382	G805035	US26441C2044	1	75	75	2	2062	2102	2142
solar	United States	Americas	Northern America	Broad River Solar				50	operating	2021		PV						Duke Energy CORP		35.188	-81.751	exact	Mooresboro	Cleveland County		North Carolina	https://gem.wiki/Broad_River_Solar	L804383	G805036	US26441C2044	1	50	50	3	2061	2101	2141
solar	United States	Americas	Northern America	Capital Partners Solar Project			Pasquotank solar farm	20	operating	2014		PV						Duke Energy CORP		36.272	-76.308	exact		Pasquotank County		North Carolina	https://gem.wiki/Capital_Partners_Solar_Project	L804384	G805037	US26441C2044	1	20	20	10	2054	2094	2134
solar	United States	Americas	Northern America	Caprock Solar	1			25	operating	2016		PV						Duke Energy CORP		34.984	-103.623	exact		Quay County		New Mexico	https://gem.wiki/Caprock_Solar	L805002	G805769	US26441C2044	1	25	25	8	2056	2096	2136
solar	United States	Americas	Northern America	Charlie Creek Solar Power Plant				75	operating	2022		PV						Duke Energy CORP		27.6398	-81.6544	exact	Wauchula	Hardee County		Florida	https://gem.wiki/Charlie_Creek_Solar_Power_Plant	L804385	G805038	US26441C2044	1	75		2	2062	2102	2142
solar	United States	Americas	Northern America	Columbia (Duke Energy) Solar Power Plant				75	operating	2020		PV						Duke Energy CORP		29.8826	-82.6962	exact		Columbia County		Florida	https://gem.wiki/Columbia_(Duke_Energy)_Solar_Power_Plant	L804386	G805039	US26441C2044	1	75	75	4	2060	2100	2140
solar	United States	Americas	Northern America	Conetoe II Solar			Conetoe solar farm	80	operating	2015		PV						Duke Energy CORP		35.822	-77.481	exact		Edgecombe County		North Carolina	https://gem.wiki/Conetoe_II_Solar	L804288	G804916	US26441C2044	1	80	80	9	2055	2095	2135
solar	United States	Americas	Northern America	Debary Solar Power Plant				74	operating	2020		PV						Duke Energy CORP		28.8995	-81.3309	exact		Volusia County		Florida	https://gem.wiki/Debary_Solar_Power_Plant	L804387	G805040	US26441C2044	1	74	74	4	2060	2100	2140
solar	United States	Americas	Northern America	Dogwood Solar				20	operating	2014		PV						Duke Energy CORP		36.121	-77.404	exact		Halifax County		North Carolina	https://gem.wiki/Dogwood_Solar	L805003	G805770	US26441C2044	1	20	20	10	2054	2094	2134
solar	United States	Americas	Northern America	Duette Solar Power Plant				74	operating	2021		PV						Duke Energy CORP		27.5858	-82.062	exact	Parrish	Manatee County		Florida	https://gem.wiki/Duette_Solar_Power_Plant	L804388	G805041	US26441C2044	1	74	74	3	2061	2101	2141
solar	United States	Americas	Northern America	East Blackland Solar Project 1			Pflugerville solar park	144	operating	2021		PV						Duke Energy CORP		30.4214	-97.4614	exact	Manor	Travis County		Texas	https://gem.wiki/East_Blackland_Solar_Project_1	L805004	G805771	US26441C2044	1	144	144	3	2061	2101	2141
solar	United States	Americas	Northern America	Elm City Solar Facility				40	operating	2016		PV						Duke Energy CORP		35.7811	-77.8469	exact		Wilson County		North Carolina	https://gem.wiki/Elm_City_Solar_Facility	L804389	G805042	US26441C2044	1	40	40	8	2056	2096	2136
solar	United States	Americas	Northern America	Fayetteville Solar			DD Fayetteville Solar NC	23	operating	2015		PV						Duke Energy CORP		34.8344	-78.8436	exact		Bladen County		North Carolina	https://gem.wiki/Fayetteville_Solar	L804390	G805043	US26441C2044	1	23	23	9	2055	2095	2135
solar	United States	Americas	Northern America	Fort Green Solar Power Plant				75	operating	2022		PV						Duke Energy CORP		27.6411	-81.9416	exact	Bowling Green	Hardee County		Florida	https://gem.wiki/Fort_Green_Solar_Power_Plant	L804391	G805044	US26441C2044	1	75	75	2	2062	2102	2142
solar	United States	Americas	Northern America	Gaston Solar Power Plant				25	operating	2020		PV						Duke Energy CORP		35.322	-81.342	approximate		Gaston County		North Carolina	https://gem.wiki/Gaston_Solar_Power_Plant	L804392	G805045	US26441C2044	1	25	25	4	2060	2100	2140
solar	United States	Americas	Northern America	Halifax solar farm				20	operating	2014		PV						Duke Energy CORP		36.4419	-77.7114	exact		Halifax County		North Carolina	https://gem.wiki/Halifax_solar_farm	L804393	G805046	US26441C2044	1	20	20	10	2054	2094	2134
solar	United States	Americas	Northern America	Hamilton Solar Power Plant				75	operating	2018		PV						Duke Energy CORP		30.4443	-83.1869	exact		Hamilton County		Florida	https://gem.wiki/Hamilton_Solar_Power_Plant	L804394	G805047	US26441C2044	1	75		6	2058	2098	2138
solar	United States	Americas	Northern America	Hardeetown Solar Power Plant				75	operating	2023		PV						Duke Energy CORP		29.4856	-82.8435	approximate		Levy County		Florida	https://gem.wiki/Hardeetown_Solar_Power_Plant	L808442	G810664	US26441C2044	1	75		1	2063	2103	2143
solar	United States	Americas	Northern America	High Springs Solar Power Plant				75	operating	2023		PV						Duke Energy CORP		29.8101	-82.6398	approximate		Alachua County		Florida	https://gem.wiki/High_Springs_Solar_Power_Plant	L808448	G810671	US26441C2044	1	75		1	2063	2103	2143
solar	United States	Americas	Northern America	Hildreth Solar Power Plant				75	operating	2023		PV						Duke Energy CORP		29.9648	-82.8232	approximate		Suwannee County		Florida	https://gem.wiki/Hildreth_Solar_Power_Plant	L808450	G810673	US26441C2044	1	75	75	1	2063	2103	2143
solar	United States	Americas	Northern America	Holstein 1 (Duke) solar farm				200	operating	2020		PV						Duke Energy CORP		32.1041	-100.162	exact		Nolan County		Texas	https://gem.wiki/Holstein_1_(Duke)_solar_farm	L804173	G804775	US26441C2044	1	200	200	4	2060	2100	2140
solar	United States	Americas	Northern America	Hoosier Jack Solar				175	announced	2024		PV						Duke Energy CORP		39.2681	-87.3244	approximate		Vigo County		Indiana	https://gem.wiki/Hoosier_Jack_Solar	L808453	G810677	US26441C2044	1	175	175	0	2064	2104	2144
solar	United States	Americas	Northern America	Innovative Solar 33			Innovative Cleveland	35	cancelled			PV						Duke Energy CORP		35.2876	-81.5369	approximate	Moorseburg	Cleveland County		North Carolina	https://gem.wiki/Innovative_Solar_33	L805006	G805773	US26441C2044	1	35	35	-99	40	80	120
solar	United States	Americas	Northern America	Innovative Solar 34			Innovative Richmond	50	cancelled			PV						Duke Energy CORP		35.0519	-79.7262	approximate	Jackson Springs	Richmond County		North Carolina	https://gem.wiki/Innovative_Solar_34	L805007	G805774	US26441C2044	1	50	50	-99	40	80	120
solar	United States	Americas	Northern America	Jackpot Solar			Twin Falls South	120	operating	2022		PV						Duke Energy CORP		42.2042	-114.61	exact	Twin Falls			Idaho	https://gem.wiki/Jackpot_Solar	L805130	G805909	US26441C2044	1	120	120	2	2062	2102	2142
solar	United States	Americas	Northern America	Kelford solar farm			Capital Partners Solar Project 2	20	operating	2015		PV						Duke Energy CORP		36.155	-77.208	exact		Bertie County		North Carolina	https://gem.wiki/Kelford_solar_farm	L804395	G805048	US26441C2044	1	20	20	9	2055	2095	2135
solar	United States	Americas	Northern America	Lake Placid Solar Power Plant				45	operating	2019		PV						Duke Energy CORP		27.3311	-81.364	exact		Highlands County		Florida	https://gem.wiki/Lake_Placid_Solar_Power_Plant	L804396	G805049	US26441C2044	1	45	45	5	2059	2099	2139
solar	United States	Americas	Northern America	Lapetus solar farm				100	operating	2019		PV						Duke Energy CORP		32.4601	-102.673	exact		Andrews County		Texas	https://gem.wiki/Lapetus_solar_farm	L804397	G805050	US26441C2044	1	100	100	5	2059	2099	2139
solar	United States	Americas	Northern America	Longboat Solar				20	operating	2016		PV						Duke Energy CORP		34.905	-117.104	exact		San Bernardino County		California	https://gem.wiki/Longboat_Solar	L805008	G805775	US26441C2044	1	20	20	8	2056	2096	2136
solar	United States	Americas	Northern America	Maiden Creek Solar Power Plant				69	operating	2021		PV						Duke Energy CORP		35.593	-81.167	exact	Maiden	Catawba County		North Carolina	https://gem.wiki/Maiden_Creek_Solar_Power_Plant	L804398	G805051	US26441C2044	1	69	69	3	2061	2101	2141
solar	United States	Americas	Northern America	Monroe Solar Facility				55	operating	2017		PV						Duke Energy CORP		34.9299	-80.6256	exact	Monroe	Union County		North Carolina	https://gem.wiki/Monroe_Solar_Facility	L804399	G805052	US26441C2044	1	55	55	7	2057	2097	2137
solar	United States	Americas	Northern America	Mule Creek solar farm			Mule Creek Renewable Energy Center	75	pre-construction	2024		PV						Duke Energy CORP		30.1105	-85.3976	approximate		Bay County		Florida	https://gem.wiki/Mule_Creek_solar_farm	L808479	G810707	US26441C2044	1	75	75	0	2064	2104	2144
solar	United States	Americas	Northern America	North Rosamond Solar				151	operating	2019		PV						Duke Energy CORP		34.862	-118.38	exact		Kern County		California	https://gem.wiki/North_Rosamond_Solar	L804400	G805053	US26441C2044	1	151	151	5	2059	2099	2139
solar	United States	Americas	Northern America	Palmer Solar				60	operating	2020		PV						Duke Energy CORP		38.6299	-104.653	exact		El Paso County		Colorado	https://gem.wiki/Palmer_Solar	L805009	G805776	US26441C2044	1	60	60	4	2060	2100	2140
solar	United States	Americas	Northern America	Pike Solar Project				175	pre-construction	2023		PV						Duke Energy CORP		38.6217	-104.581	approximate	Fountain	El Paso County		Colorado	https://gem.wiki/Pike_Solar_Project	L805132	G805911	US26441C2044	1	175	175	1	2063	2103	2143
solar	United States	Americas	Northern America	Pinson solar farm				20	operating	2022		PV						Duke Energy CORP		34.7201	-82.06	exact	Woodruff	Spartanburg County		South Carolina	https://gem.wiki/Pinson_solar_farm	L805408	G806239	US26441C2044	1	20	20	2	2062	2102	2142
solar	United States	Americas	Northern America	Pisgah Ridge Solar				250	operating	2022		PV						Duke Energy CORP		31.8965	-96.4671	exact		Navarro County		Texas	https://gem.wiki/Pisgah_Ridge_Solar	L808498	G810726	US26441C2044	1	250	250	2	2062	2102	2142
solar	United States	Americas	Northern America	Pumpjack Solar I				20	operating	2015		PV						Duke Energy CORP		35.3056	-119.623	exact		Kern County		California	https://gem.wiki/Pumpjack_Solar_I	L804401	G805054	US26441C2044	1	20	20	9	2055	2095	2135
solar	United States	Americas	Northern America	Rambler solar farm				200	operating	2020		PV						Duke Energy CORP		31.517	-100.6	exact		Tom Green County		Texas	https://gem.wiki/Rambler_solar_farm	L804402	G805055	US26441C2044	1	200	200	4	2060	2100	2140
solar	United States	Americas	Northern America	Rattler Solar Power Plant				75	shelved			PV						Duke Energy CORP		28.5553	-82.3879	approximate		Brooksville County		Florida	https://gem.wiki/Rattler_Solar_Power_Plant	L805010	G805777	US26441C2044	1	75	75	-99	40	80	120
solar	United States	Americas	Northern America	Rio Bravo Solar	1			20	operating	2016		PV						Duke Energy CORP		35.416	-119.63	exact		Kern County		California	https://gem.wiki/Rio_Bravo_Solar	L805011	G805778	US26441C2044	1	40		8	2056	2096	2136
solar	United States	Americas	Northern America	Rio Bravo Solar	2			20	operating	2016		PV						Duke Energy CORP		35.4225	-119.629	exact		Kern County		California	https://gem.wiki/Rio_Bravo_Solar	L805011	G805779	US26441C2044	1	40	40	8	2056	2096	2136
solar	United States	Americas	Northern America	Sandy Creek Solar Power Plant				75	operating	2022		PV						Duke Energy CORP		30.1031	-85.4104	exact	Panama City	Bay County		Florida	https://gem.wiki/Sandy_Creek_Solar_Power_Plant	L804403	G805056	US26441C2044	1	75		2	2062	2102	2142
solar	United States	Americas	Northern America	Santa Fe Solar Power Plant				75	operating	2021		PV						Duke Energy CORP		29.871	-82.723	exact	Archer	Alachua County		Florida	https://gem.wiki/Santa_Fe_Solar_Power_Plant	L804404	G805057	US26441C2044	1	75	75	3	2061	2101	2141
solar	United States	Americas	Northern America	Seville solar farm	1			20	operating	2015		PV						Duke Energy CORP		33.1125	-116.014	exact		Imperial County		California	https://gem.wiki/Seville_solar_farm	L805012	G805780	US26441C2044	1	50		9	2055	2095	2135
solar	United States	Americas	Northern America	Seville solar farm	2			30	operating	2015		PV						Duke Energy CORP		33.1101	-116.006	exact		Imperial County		California	https://gem.wiki/Seville_solar_farm	L805012	G805781	US26441C2044	1	50	50	9	2055	2095	2135
solar	United States	Americas	Northern America	Shawboro solar farm				20	operating	2015		PV						Duke Energy CORP		36.4333	-76.0872	exact		Camden County		North Carolina	https://gem.wiki/Shawboro_solar_farm	L805013	G805782	US26441C2044	1	20	20	9	2055	2095	2135
solar	United States	Americas	Northern America	Shoreham Solar Commons				25	operating	2018		PV						Duke Energy CORP		40.9344	-72.8885	exact		Suffolk County		New York	https://gem.wiki/Shoreham_Solar_Commons	L804405	G805058	US26441C2044	1	25	25	6	2058	2098	2138
solar	United States	Americas	Northern America	South Dixon Solar				500	shelved			PV						Duke Energy CORP		41.7817	-89.5012	exact		Lee County		Illinois	https://gem.wiki/South_Dixon_Solar	L804406	G805059	US26441C2044	1	500	500	-99	40	80	120
solar	United States	Americas	Northern America	Speedway (North Carolina) Solar				23	operating	2021		PV						Duke Energy CORP		35.218	-80.536	exact	Midland	Cabarrus County		North Carolina	https://gem.wiki/Speedway_(North_Carolina)_Solar	L804407	G805060	US26441C2044	1	23		3	2061	2101	2141
solar	United States	Americas	Northern America	Stony Knoll Solar				23	operating	2022		PV						Duke Energy CORP		36.288	-80.656	exact	Rockford	Surry County		North Carolina	https://gem.wiki/Stony_Knoll_Solar	L804408	G805061	US26441C2044	1	23	23	2	2062	2102	2142
solar	United States	Americas	Northern America	Tomlin Mill Road solar farm				35	shelved			PV						Duke Energy CORP		35.9569	-80.7714	approximate	Chalotte	Iredell County		North Carolina	https://gem.wiki/Tomlin_Mill_Road_solar_farm	L805014	G805783	US26441C2044	1	35	35	-99	40	80	120
solar	United States	Americas	Northern America	Trenton Solar Power Plant				75	operating	2019		PV						Duke Energy CORP		29.6351	-82.8431	exact		Gilchrist County		Florida	https://gem.wiki/Trenton_Solar_Power_Plant	L804409	G805062	US26441C2044	1	75		5	2059	2099	2139
solar	United States	Americas	Northern America	Twin Rivers Solar Power Plant				75	operating	2021		PV						Duke Energy CORP		30.4664	-82.9687	exact	Jasper	Hamilton County		Florida	https://gem.wiki/Twin_Rivers_Solar_Power_Plant	L804410	G805063	US26441C2044	1	75	75	3	2061	2101	2141
solar	United States	Americas	Northern America	Warsaw Farm solar farm				65	operating	2015		PV						Duke Energy CORP		35.0056	-78.1258	exact		Duplin County		North Carolina	https://gem.wiki/Warsaw_Farm_solar_farm	L804411	G805064	US26441C2044	1	65	65	9	2055	2095	2135
solar	United States	Americas	Northern America	Wewahitchka solar farm				75	shelved			PV						Duke Energy CORP		29.9983	-85.3688	approximate		Overstreet County		Florida	https://gem.wiki/Wewahitchka_solar_farm	L805005	G805772	US26441C2044	1	75	75	-99	40	80	120
solar	United States	Americas	Northern America	Wildflower (Mississippi) Solar				100	construction	2023		PV						Duke Energy CORP		34.962	-90.184	exact		DeSoto County		Mississippi	https://gem.wiki/Wildflower_(Mississippi)_Solar	L833398	G839127	US26441C2044	1	100	100	1	2063	2103	2143
solar	United States	Americas	Northern America	Winquepin solar farm			Winquepin Renewable Energy Center	75	pre-construction	2024		PV						Duke Energy CORP		30.2825	-83.2982	approximate		Madison County		Florida	https://gem.wiki/Winquepin_solar_farm	L833405	G839135	US26441C2044	1	75	75	0	2064	2104	2144
solar	United States	Americas	Northern America	Wolf Pit Branch Solar				62	construction	2023		PV						Duke Energy CORP		33.741	-81.4	exact		Lexington County		South Carolina	https://gem.wiki/Wolf_Pit_Branch_Solar	L808557	G810802	US26441C2044	1	62	62	1	2063	2103	2143
wind	United States	Americas	Northern America	Campbell Hill wind farm	1			99	operating	2009		onshore						Duke Energy CORP		42.9993	-106.021	exact		Converse County		Wyoming	https://gem.wiki/Campbell_Hill_wind_farm	L906947	G909351	US26441C2044	1	99	99	15	2049	2089	2129
wind	United States	Americas	Northern America	Cimarron II wind farm	1			131	operating	2012		onshore						Duke Energy CORP [50%]; Sumitomo Corporation of Americas [50%]		37.8727	-100.403	exact		Gray County		Kansas	https://gem.wiki/Cimarron_II_wind_farm	L907136	G909610	US26441C2044	0.5	131	131	12	2052	2092	2132
wind	United States	Americas	Northern America	Frontier wind farm	1			200	operating	2016		onshore						Duke Energy CORP		36.8357	-97.2494	exact		Kay County		Oklahoma	https://gem.wiki/Frontier_wind_farm	L907349	G909901	US26441C2044	1	552		8	2056	2096	2136
wind	United States	Americas	Northern America	Frontier wind farm	2			352	operating	2021		onshore						Duke Energy CORP		36.8271	-97.0289	exact		Kay County		Oklahoma	https://gem.wiki/Frontier_wind_farm	L907349	G910269	US26441C2044	1	552	552	3	2061	2101	2141
wind	United States	Americas	Northern America	Happy Jack Windpower Project	1			29	operating	2008		onshore						Duke Energy CORP		41.1413	-105.009	exact		Laramie County		Wyoming	https://gem.wiki/Happy_Jack_Windpower_Project	L906536	G908825	US26441C2044	1	29	29	16	2048	2088	2128
wind	United States	Americas	Northern America	Ironwood wind farm	1			168	operating	2012		onshore						Duke Energy CORP [50%]; Sumitomo Corporation of Americas [50%]		37.8386	-99.774	exact		Ford County		Kansas	https://gem.wiki/Ironwood_wind_farm	L907281	G909808	US26441C2044	0.5	168	168	12	2052	2092	2132
wind	United States	Americas	Northern America	Kit Carson Project wind farm	1			51	operating	2010		onshore						Duke Energy CORP		39.354	-102.305	exact		Kit Carson County		Colorado	https://gem.wiki/Kit_Carson_Project_wind_farm	L906705	G909029	US26441C2044	1	51	51	14	2050	2090	2130
wind	United States	Americas	Northern America	Laurel Hill wind farm	1			69	operating	2012		onshore						Duke Energy CORP		41.5269	-77.0462	exact		Lycoming County		Pennsylvania	https://gem.wiki/Laurel_Hill_wind_farm	L906791	G909144	US26441C2044	1	69	69	12	2052	2092	2132
wind	United States	Americas	Northern America	Ledyard wind farm	1		Ledyard Windpower	207	operating	2022		onshore						Duke Energy CORP		43.4392	-94.1589	exact		Kossuth County		Iowa	https://gem.wiki/Ledyard_wind_farm	L917224	G921370	US26441C2044	1	207	207	2	2062	2102	2142
wind	United States	Americas	Northern America	Los Vientos wind farm	1			200	operating	2012		onshore						Duke Energy CORP		26.3082	-97.582	exact		Cameron County		Texas	https://gem.wiki/Los_Vientos_wind_farm	L907073	G927309	US26441C2044	1	912		12	2052	2092	2132
wind	United States	Americas	Northern America	Los Vientos wind farm	2			202	operating	2012		onshore						Duke Energy CORP		26.3488	-97.6901	exact		Willacy County		Texas	https://gem.wiki/Los_Vientos_wind_farm	L907073	G927310	US26441C2044	1	912		12	2052	2092	2132
wind	United States	Americas	Northern America	Los Vientos wind farm	3			200	operating	2015		onshore						Duke Energy CORP		26.4281	-98.6032	exact		Starr County		Texas	https://gem.wiki/Los_Vientos_wind_farm	L907073	G909942	US26441C2044	1	912		9	2055	2095	2135
wind	United States	Americas	Northern America	Los Vientos wind farm	5			110	operating	2015		onshore						Duke Energy CORP		26.4056	-98.5784	exact		Starr County		Texas	https://gem.wiki/Los_Vientos_wind_farm	L907073	G909522	US26441C2044	1	912		9	2055	2095	2135
wind	United States	Americas	Northern America	Los Vientos wind farm	4			200	operating	2016		onshore						Duke Energy CORP		26.5482	-98.7101	exact		Starr County		Texas	https://gem.wiki/Los_Vientos_wind_farm	L907073	G909943	US26441C2044	1	912	912	8	2056	2096	2136
wind	United States	Americas	Northern America	Maryneal Windpower Farm	1			182	operating	2021		onshore						Duke Energy CORP		32.1918	-100.503	exact	Maryneal	Nolan County		Texas	https://gem.wiki/Maryneal_Windpower_Farm	L907311	G909847	US26441C2044	1	182	182	3	2061	2101	2141
wind	United States	Americas	Northern America	Mesquite Creek wind farm	1			211	operating	2015		onshore						Duke Energy CORP		32.6928	-101.696	exact		Dawson County		Texas	https://gem.wiki/Mesquite_Creek_wind_farm	L907449	G910045	US26441C2044	1	211	211	9	2055	2095	2135
wind	United States	Americas	Northern America	Mesteño wind farm	1			202	operating	2019		onshore						Duke Energy CORP		26.4905	-98.7305	exact		Starr County		Texas	https://gem.wiki/Mesteño_wind_farm	L907419	G910001	US26441C2044	1	202	202	5	2059	2099	2139
wind	United States	Americas	Northern America	North Allegheny Windpower Project	1			70	operating	2009		onshore						Duke Energy CORP		40.3765	-78.6286	exact	Portage Township	Cambria County		Pennsylvania	https://gem.wiki/North_Allegheny_Windpower_Project	L906796	G909150	US26441C2044	1	70	70	15	2049	2089	2129
wind	United States	Americas	Northern America	Notrees Windpower Hybrid	1			92	operating	2009		onshore						Duke Energy CORP		31.9667	-102.809	exact		Winkler County		Texas	https://gem.wiki/Notrees_Windpower_Hybrid	L906746	G909315	US26441C2044	1	152		15	2049	2089	2129
wind	United States	Americas	Northern America	Notrees Windpower Hybrid	2			60	operating	2009		onshore						Duke Energy CORP		31.9667	-102.809	exact		Winkler County		Texas	https://gem.wiki/Notrees_Windpower_Hybrid	L906746	G909085	US26441C2044	1	152	152	15	2049	2089	2129
wind	United States	Americas	Northern America	Ocotillo (Duke) Windpower	1			59	operating	2008		onshore						Duke Energy CORP		32.1576	-101.397	exact		Howard County		Texas	https://gem.wiki/Ocotillo_(Duke)_Windpower	L906727	G909061	US26441C2044	1	59	59	16	2048	2088	2128
wind	United States	Americas	Northern America	Pamlico Sound wind farm	1			15	cancelled			offshore hard mount						Duke Energy CORP		35.3164	-75.8919	approximate					https://gem.wiki/Pamlico_Sound_wind_farm	L921958	G927333	US26441C2044	1	15	15	-99	40	80	120
wind	United States	Americas	Northern America	Shirley Wind Project	1			20	operating	2010		onshore						Duke Energy CORP		44.3475	-87.9197	exact		Brown County		Wisconsin	https://gem.wiki/Shirley_Wind_Project	L906427	G908703	US26441C2044	1	20	20	14	2050	2090	2130
wind	United States	Americas	Northern America	Silver Sage Windpower	1			42	operating	2009		onshore						Duke Energy CORP		41.137	-105.029	exact		Laramie County		Wyoming	https://gem.wiki/Silver_Sage_Windpower	L906629	G908938	US26441C2044	1	42	42	15	2049	2089	2129
wind	United States	Americas	Northern America	Sweetwater wind farm	5			80	operating	2007		onshore						Leeward Energy [53%]; Duke Energy CORP [47%]		32.2371	-100.491	exact		Nolan County		Texas	https://gem.wiki/Sweetwater_wind_farm	L906593	G909274	US26441C2044	0.47	321		17	2047	2087	2127
wind	United States	Americas	Northern America	Sweetwater wind farm	4A			135	operating	2007		onshore						Leeward Energy [53%]; Duke Energy CORP [47%]		32.2839	-100.533	exact		Nolan County		Texas	https://gem.wiki/Sweetwater_wind_farm	L906593	G909626	US26441C2044	0.47	321		17	2047	2087	2127
wind	United States	Americas	Northern America	Sweetwater wind farm	4B			106	operating	2007		onshore						Leeward Energy [53%]; Duke Energy CORP [47%]		32.2488	-100.496	exact		Nolan County		Texas	https://gem.wiki/Sweetwater_wind_farm	L906593	G909501	US26441C2044	0.47	321	321	17	2047	2087	2127
wind	United States	Americas	Northern America	Top Of The World Windpower Project	1			200	operating	2010		onshore						Duke Energy CORP		42.9632	-105.74	exact		Converse County		Wyoming	https://gem.wiki/Top_Of_The_World_Windpower_Project	L907409	G909979	US26441C2044	1	200	200	14	2050	2090	2130
wind	United States	Americas	Northern America	Wilmington East Wind Energy Area	1		OCS-A 0546	893	pre-construction			offshore hard mount						Duke Energy CORP		33.6767	-78.0402	approximate	Oak Island			North Carolina	https://gem.wiki/Wilmington_East_Wind_Energy_Area	L907702	G910367	US26441C2044	1	893	893	-99	40	80	120

## Sheet: Factors
Fuel Type	Capacity factor 2021	Capacity factor 2022	CF2020	CF2021	CF2022	CF2023		Duke Energy Corp. - annual report 2021	https://s201.q4cdn.com/583395453/files/doc_financials/2021/ar/2021-duke-energy-annual-report.pdf
Coal-hard	0.321642	0.250769	0.317018	0.326265	0.259583	0.241954		Duke Energy Corp. - annual report 2022	https://s201.q4cdn.com/583395453/files/doc_financials/2023/ar/2022-Annual-Report.pdf
Lignite	0	0	0	0	0	0
Oil	0.0259287	0.0326657	0.0259287	0.0259287	0.0326657	0.0326657
Gas	0.416929	0.436546	0.400848	0.43301	0.490009	0.383083
Fuel Type	Heat rate (Btu per kWh) 2022
Coal	10689							CDP C-EU8.2d 2021
Petroleum	11166							Energy Source Type	Nameplate capacity (MW)	Gross electricity generation (GWh)	Net electricity generation (GWh)	Absolute scope 1 emissions (metric tons CO2e)	Scope 1 emissions intensity (metric tons CO2e per GWh)		Capacity factor
Natural Gas	7740							Coal – hard	15652	53443	48181	44110979	825		0.389778
Nuclear	10448							Lignite
								Oil	995	226	214	169579	750		0.0259287
Fuel Type	Emission factors (kg of CO2 per TJ) US		Fuel Type	Emission factors (kg of CO2 per TJ) IPCC2006				Gas	19788	79750	77679	32993033	414		0.460071
Bituminous Coal	88374.7		Crude Oil	73300				Sustainable biomass
Distillate Oil	70271.4		Natural Gas Liquids	64200				Other biomass
Jet Fuel	68461		Coking Coal	94600				Waste (non-biomass)
Kerosene	69370.9		Other Bituminous Coal	94600				Nuclear	8907	78282101	75328	0	0
Lignite Coal	93142.3		Sub-Bituminous Coal	96100				Fossil-fuel plants fitted with CCS
Municipal Solid Waste	47286.7		Lignite	101000				Geothermal
Natural Gas	50149.2		Coke	107000				Hydropower	1339	2870	2870	0	0		0.244679
Petroleum Coke	96791.4		Gas/Diesel Oil	74100				Wind	2987	7387	7387	0	0		0.282312
Propane Gas	59598.9		Residual Fuel Oil	77400				Solar	1973	4325	4325	0	0		0.250239
Refined Coal	88374.7		Natural Gas	56100				Marine
Residual Fuel Oil	71171.8		Natural Gas Liquids	64200				Other renewable
Subbituminous Coal	92061.8		Wood / Wood Waste	112000				Other non-renewable
Tire-Derived Fuel	81484.1		Charcoal	112000				Total	51685	229526	215131	77408758	337		0.506948
Waste Coal	88374.7		Industrial Wastes	143000
Waste Oil	70138.7		Waste Oils	73300				CDP C-EU8.2d 2022
Fuel Type	Emission factors (kg of CO2 per MMBTU) US		Fuel Type	Emission factors (kg of CO2 per MMBTU) IPCC2006				Energy Source Type	Nameplate capacity (MW)	Gross electricity generation (GWh)	Net electricity generation (GWh)	Absolute scope 1 emissions (metric tons CO2e)	Scope 1 emissions intensity (metric tons CO2e per GWh)		Capacity factor
Bituminous Coal	93.24		Crude Oil	77.3354				Coal – hard	17020	41000	37000	36600000	889		0.274992
Distillate Oil	74.14		Natural Gas Liquids	67.7344				Lignite
Jet Fuel	72.23		Coking Coal	99.808				Oil	1307	374	358	270000	715		0.0326657
Kerosene	73.19		Other Bituminous Coal	99.808				Gas	24145	96000	93000	40500000	422		0.453879
Lignite Coal	98.27		Sub-Bituminous Coal	101.391				Sustainable biomass
Municipal Solid Waste	49.89		Lignite	106.56				Other biomass
Natural Gas	52.91		Coke	112.891				Waste (non-biomass)
Petroleum Coke	102.12		Gas/Diesel Oil	78.1794				Nuclear	9294	76000	73000	0	0
Propane Gas	62.88		Residual Fuel Oil	81.6611				Fossil-fuel plants fitted with CCS
Refined Coal	93.24		Natural Gas	59.1885				Geothermal
Residual Fuel Oil	75.09		Natural Gas Liquids	67.7344				Hydropower	3647	5700	1900	0	0		0.178416
Subbituminous Coal	97.13		Wood / Wood Waste	118.166				Wind	3194	8600	8600	0	0		0.307369
Tire-Derived Fuel	85.97		Charcoal	118.166				Solar	3148	5300	5300	0	0		0.192193
Waste Coal	93.24		Industrial Wastes	150.873				Marine
Waste Oil	74		Waste Oils	77.3354				Other renewable
								Other non-renewable	44	340	340	122000	357
								Total	61799	230000	220000	77000000	332		0.424857
									2023	2022	2021	2020
								Total owned capacity (MW)	54772	49870	50259	50807
								Nuclear	9322	8908	8908	8908
								Fossil fuel	40107	36681	37252	38010
								Hydro	3722	3639	3639	3577
								Renewable	1621	642	460	312
								Coal	15174	15662	16081	16054	2023	2022	2021	2020
								Oil & Gas	24933	21019	21171	21956	40107	36681	37252	38010
								Generation by source	2023	2022	2021	2020
								Natural gas & oil	0.333	0.342	0.318	0.313
								Coal	0.128	0.135	0.182	0.181	73137.6	81208.3	96256.7	84574.9
								Nuclear	0.284	0.266	0.298	0.296
								Total Generation	0.763	0.758	0.813	0.809	121050	129048	156513	138504
								Purchase Power	0.237	0.242	0.187	0.191	158650	170248	192513	171204
								Purchase power generation (millions of MWh)	37.6	41.2	36	32.7	37600	41200	36000	32700
								Purchase capacity under contract (MW)	3997	4028	4259	4716
									2023	2022	2021	2020	CF2023_22	CF2021_20
								Net proportional MW capacity in operation	54404	54347	49871	50419
								Total Electric Utilities and Infrastructure GWh sales	251.262	263.812	252.532	246.316
								Coal	0.241954	0.259583	0.326265	0.317018	0.250769	0.321642
								Oil & Gas	0.383083	0.490009	0.43301	0.400848	0.436546	0.416929
								https://s201.q4cdn.com/583395453/files/doc_financials/2024/ar/2023-annual-report.pdf
								https://investors.duke-energy.com/financials/annual-reports/default.aspx
								Exit coal generation by 2035 subject to regulatory approval
								https://s201.q4cdn.com/583395453/files/doc_downloads/2024/05/impact-report-2023-final.pdf

## Sheet: DukeEnergy_BAU
Type	Country/area	Region	Subregion	Plant / Project name	Unit / Phase name	Plant / Project name (local)	Plant / Project name (other)	Capacity (MW)	Status	Start year	Retired year	Technology	Fuel	Country/area 1 (hydropower only)	Country/area 2 (hydropower only)	Country/area 1 Capacity (MW) (hydropower only)	Country/area 2 Capacity (MW) (hydropower only)	Owner	Parent	Latitude	Longitude	Location accuracy	City	Local area (taluk, county)	Major area (prefecture, district)	Subnational unit (state, province)	GEM.Wiki URL	GEM location ID	GEM unit/phase ID	CompISIN	Ownership	Plant capacity	Plant capacity	Age	Reinvestment year	Reinvestment year	Reinvestment year	2020	2021	2022	2023	2024	2025	2026	2027	2028	2029	2030	2031
coal	United States	Americas	Northern America	Belews Creek Steam Station	Unit 1			1080	operating	1974	2039	supercritical	bituminous					Duke Energy Carolinas [100%]	Duke Energy Corp [100.0%]	36.2825	-80.0585	exact	Walnut Cove	Stokes		North Carolina	https://www.gem.wiki/Belews_Creek_Steam_Station	L100000104072	G100000100736	US26441C2044	1	2160		50	2014	2054	2094	1080	1080	1080	1080	1080	1080	1080	1080	1080	1080	1080	1080
coal	United States	Americas	Northern America	Belews Creek Steam Station	Unit 2			1080	operating	1975	2039	supercritical	bituminous					Duke Energy Carolinas [100%]	Duke Energy Corp [100.0%]	36.2825	-80.0585	exact	Walnut Cove	Stokes		North Carolina	https://www.gem.wiki/Belews_Creek_Steam_Station	L100000104072	G100000100737	US26441C2044	1	2160	2160	49	2015	2055	2095	1080	1080	1080	1080	1080	1080	1080	1080	1080	1080	1080	1080
coal	United States	Americas	Northern America	Cayuga Generating Station	Unit 1			531	operating	1970	2027	subcritical	bituminous					Duke Energy Indiana [100%]	Duke Energy Corp [100.0%]	39.9233	-87.4274	exact	Cayuga	Vermillion		Indiana	https://www.gem.wiki/Cayuga_Generating_Station	L100000103880	G100000101246	US26441C2044	1	1175		54	2010	2050	2090	531	531	531	531	531	531	531	531	531	531	531	531
coal	United States	Americas	Northern America	Cayuga Generating Station	Unit 2			531	operating	1972	2027	subcritical	bituminous					Duke Energy Indiana [100%]	Duke Energy Corp [100.0%]	39.9233	-87.4274	exact	Cayuga	Vermillion		Indiana	https://www.gem.wiki/Cayuga_Generating_Station	L100000103880	G100000101247	US26441C2044	1	1175	1175	52	2012	2052	2092	531	531	531	531	531	531	531	531	531	531	531	531
coal	United States	Americas	Northern America	Crystal River Energy Complex	Unit 4			739.2	operating	1982		subcritical	bituminous					Duke Energy Florida [100%]	Duke Energy Corp [100.0%]	28.957	-82.7006	exact	Crystal River	Citrus		Florida	https://www.gem.wiki/Crystal_River_Energy_Complex	L100000103825	G100000101841	US26441C2044	1	3448.4		42	2022	2062	2102	739.2	739.2	739.2	739.2	739.2	739.2	739.2	739.2	739.2	739.2	739.2	739.2
coal	United States	Americas	Northern America	Crystal River Energy Complex	Unit 5			739.2	operating	1984		subcritical	bituminous					Duke Energy Florida [100%]	Duke Energy Corp [100.0%]	28.957	-82.7006	exact	Crystal River	Citrus		Florida	https://www.gem.wiki/Crystal_River_Energy_Complex	L100000103825	G100000101842	US26441C2044	1	3448.4	3448.4	40	2024	2064	2104	739.2	739.2	739.2	739.2	739.2	739.2	739.2	739.2	739.2	739.2	739.2	739.2
coal	United States	Americas	Northern America	East Bend Generating Station	Unit 2			669.3	operating	1981		subcritical	bituminous					Duke Energy Kentucky [100%]	Duke Energy Corp [100.0%]	38.9042	-84.8513	exact	Rabbit Hash	Boone		Kentucky	https://www.gem.wiki/East_Bend_Generating_Station	L100000103938	G100000102546	US26441C2044	1	669.3	669.3	43	2021	2061	2101	669.3	669.3	669.3	669.3	669.3	669.3	669.3	669.3	669.3	669.3	669.3	669.3
coal	United States	Americas	Northern America	Edwardsport power station	Unit 1			236.5	operating	2013		IGCC	unknown					Duke Energy Indiana [100%]	Duke Energy Corp [100.0%]	38.7975	-87.2505	exact	Edwardsport			Indiana	https://www.gem.wiki/Edwardsport_power_station	L100000103885	G100000102595	US26441C2044	1	804.5		11	2053	2093	2133	236.5	236.5	236.5	236.5	236.5	236.5	236.5	236.5	236.5	236.5	236.5	236.5
coal	United States	Americas	Northern America	Edwardsport power station	Unit 2			236.5	operating	2013		IGCC	unknown					Duke Energy Indiana [100%]	Duke Energy Corp [100.0%]	38.7975	-87.2505	exact	Edwardsport			Indiana	https://www.gem.wiki/Edwardsport_power_station	L100000103885	G100000115937	US26441C2044	1	804.5		11	2053	2093	2133	236.5	236.5	236.5	236.5	236.5	236.5	236.5	236.5	236.5	236.5	236.5	236.5
coal	United States	Americas	Northern America	Edwardsport power station	Unit 3			331.5	operating	2013		IGCC	unknown					Duke Energy Indiana [100%]	Duke Energy Corp [100.0%]	38.7975	-87.2505	exact	Edwardsport			Indiana	https://www.gem.wiki/Edwardsport_power_station	L100000103885	G100000115938	US26441C2044	1	804.5	804.5	11	2053	2093	2133	331.5	331.5	331.5	331.5	331.5	331.5	331.5	331.5	331.5	331.5	331.5	331.5
coal	United States	Americas	Northern America	G.G. Allen Steam Plant	Unit 2			165	retired	1957	2021	subcritical	bituminous					Duke Energy Carolinas [100%]	Duke Energy Corp [100.0%]	35.1903	-81.0083	exact	Belmont	Gaston		North Carolina	https://www.gem.wiki/G.G._Allen_Steam_Plant	L100000104079	G100000102876	US26441C2044	1	1155		67	1997	2037	2077	165	0	0	0	0	0	0	0	0	0	0	0
coal	United States	Americas	Northern America	G.G. Allen Steam Plant	Unit 1			165	operating	1957	2024	subcritical	bituminous					Duke Energy Carolinas [100%]	Duke Energy Corp [100.0%]	35.1903	-81.0083	exact	Belmont	Gaston		North Carolina	https://www.gem.wiki/G.G._Allen_Steam_Plant	L100000104079	G100000102875	US26441C2044	1	1155		67	1997	2037	2077	165	165	165	165	165	165	165	165	165	165	165	165
coal	United States	Americas	Northern America	G.G. Allen Steam Plant	Unit 3			275	retired	1959	2021	subcritical	bituminous					Duke Energy Carolinas [100%]	Duke Energy Corp [100.0%]	35.1903	-81.0083	exact	Belmont	Gaston		North Carolina	https://www.gem.wiki/G.G._Allen_Steam_Plant	L100000104079	G100000102877	US26441C2044	1	1155		65	1999	2039	2079	275	0	0	0	0	0	0	0	0	0	0	0
coal	United States	Americas	Northern America	G.G. Allen Steam Plant	Unit 4			275	retired	1960	2021	subcritical	bituminous					Duke Energy Carolinas [100%]	Duke Energy Corp [100.0%]	35.1903	-81.0083	exact	Belmont	Gaston		North Carolina	https://www.gem.wiki/G.G._Allen_Steam_Plant	L100000104079	G100000102878	US26441C2044	1	1155		64	2000	2040	2080	275	0	0	0	0	0	0	0	0	0	0	0
coal	United States	Americas	Northern America	G.G. Allen Steam Plant	Unit 5			275	operating	1961	2024	subcritical	bituminous					Duke Energy Carolinas [100%]	Duke Energy Corp [100.0%]	35.1903	-81.0083	exact	Belmont	Gaston		North Carolina	https://www.gem.wiki/G.G._Allen_Steam_Plant	L100000104079	G100000102879	US26441C2044	1	1155	1155	63	2001	2041	2081	275	275	275	275	275	275	275	275	275	275	275	275
coal	United States	Americas	Northern America	Gallagher Generating Station	Unit 2		R. Gallagher Generating Station	150	retired	1958	2021	subcritical	bituminous					Duke Energy Indiana [100%]	Duke Energy Corp [100.0%]	38.2637	-85.8381	exact	New Albany	Floyd		Indiana	https://www.gem.wiki/Gallagher_Generating_Station	L100000103888	G100000102909	US26441C2044	1	300		66	1998	2038	2078	150	0	0	0	0	0	0	0	0	0	0	0
coal	United States	Americas	Northern America	Gallagher Generating Station	Unit 4		R. Gallagher Generating Station	150	retired	1961	2021	subcritical	bituminous					Duke Energy Indiana [100%]	Duke Energy Corp [100.0%]	38.2637	-85.8381	exact	New Albany	Floyd		Indiana	https://www.gem.wiki/Gallagher_Generating_Station	L100000103888	G100000102911	US26441C2044	1	300	300	63	2001	2041	2081	150	0	0	0	0	0	0	0	0	0	0	0
coal	United States	Americas	Northern America	Gibson Generating Station	Unit 1			667.9	operating	1975	2035	supercritical	bituminous					Duke Energy Indiana [100%]	Duke Energy Corp [100.0%]	38.3714	-87.7682	exact	East Mount Carmel	Gibson		Indiana	https://www.gem.wiki/Gibson_Generating_Station	L100000103889	G100000103028	US26441C2044	1	3339.5		49	2015	2055	2095	667.9	667.9	667.9	667.9	667.9	667.9	667.9	667.9	667.9	667.9	667.9	667.9
coal	United States	Americas	Northern America	Gibson Generating Station	Unit 2			667.9	operating	1976	2035	supercritical	bituminous					Duke Energy Indiana [100%]	Duke Energy Corp [100.0%]	38.3714	-87.7682	exact	East Mount Carmel	Gibson		Indiana	https://www.gem.wiki/Gibson_Generating_Station	L100000103889	G100000103029	US26441C2044	1	3339.5		48	2016	2056	2096	667.9	667.9	667.9	667.9	667.9	667.9	667.9	667.9	667.9	667.9	667.9	667.9
coal	United States	Americas	Northern America	Gibson Generating Station	Unit 3			667.9	operating	1978	2029	supercritical	bituminous					Duke Energy Indiana [100%]	Duke Energy Corp [100.0%]	38.3714	-87.7682	exact	East Mount Carmel	Gibson		Indiana	https://www.gem.wiki/Gibson_Generating_Station	L100000103889	G100000103030	US26441C2044	1	3339.5		46	2018	2058	2098	667.9	667.9	667.9	667.9	667.9	667.9	667.9	667.9	667.9	667.9	667.9	667.9
coal	United States	Americas	Northern America	Gibson Generating Station	Unit 4			667.9	operating	1979	2029	supercritical	bituminous					Duke Energy Indiana [100%]	Duke Energy Corp [100.0%]	38.3714	-87.7682	exact	East Mount Carmel	Gibson		Indiana	https://www.gem.wiki/Gibson_Generating_Station	L100000103889	G100000103031	US26441C2044	1	3339.5		45	2019	2059	2099	667.9	667.9	667.9	667.9	667.9	667.9	667.9	667.9	667.9	667.9	667.9	667.9
coal	United States	Americas	Northern America	Gibson Generating Station	Unit 5			667.9	operating	1982	2025	supercritical	bituminous					Wabash Valley Power Association [25%]; Indiana Municipal Power Agency [24%]; Duke Energy Indiana [50%]	Duke Energy Corp [50.0%]; Wabash Valley Power Association [25.0%]; Indiana Municipal Power Agency [25.0%]	38.3714	-87.7682	exact	East Mount Carmel	Gibson		Indiana	https://www.gem.wiki/Gibson_Generating_Station	L100000103889	G100000103032	US26441C2044	0.5	3339.5	3339.5	42	2022	2062	2102	333.95	333.95	333.95	333.95	333.95	333.95	333.95	333.95	333.95	333.95	333.95	333.95
coal	United States	Americas	Northern America	James E. Rogers Energy Complex	Unit 5		Cliffside Plant	621	operating	1972	2025	subcritical	bituminous					Duke Energy Carolinas [100%]	Duke Energy Corp [100.0%]	35.2164	-81.7624	exact	Cliffside	Cleveland		North Carolina	https://www.gem.wiki/James_E._Rogers_Energy_Complex	L100000104075	G100000101608	US26441C2044	1	1530.5	1530.5	52	2012	2052	2092	621	621	621	621	621	621	621	621	621	621	621	621
coal	United States	Americas	Northern America	Marshall Steam Station	Unit 1			350	operating	1965	2028	subcritical	bituminous					Duke Energy Carolinas [100%]	Duke Energy Corp [100.0%]	35.5979	-80.9612	exact	Terrell	Catawba		North Carolina	https://www.gem.wiki/Marshall_Steam_Station	L100000104082	G100000106696	US26441C2044	1	1996		59	2005	2045	2085	350	350	350	350	350	350	350	350	350	350	350	350
coal	United States	Americas	Northern America	Marshall Steam Station	Unit 2			350	operating	1966	2028	subcritical	bituminous					Duke Energy Carolinas [100%]	Duke Energy Corp [100.0%]	35.5979	-80.9612	exact	Terrell	Catawba		North Carolina	https://www.gem.wiki/Marshall_Steam_Station	L100000104082	G100000106697	US26441C2044	1	1996		58	2006	2046	2086	350	350	350	350	350	350	350	350	350	350	350	350
coal	United States	Americas	Northern America	Marshall Steam Station	Unit 3			648	operating	1969	2033	supercritical	bituminous					Duke Energy Carolinas [100%]	Duke Energy Corp [100.0%]	35.5979	-80.9612	exact	Terrell	Catawba		North Carolina	https://www.gem.wiki/Marshall_Steam_Station	L100000104082	G100000106698	US26441C2044	1	1996		55	2009	2049	2089	648	648	648	648	648	648	648	648	648	648	648	648
coal	United States	Americas	Northern America	Marshall Steam Station	Unit 4			648	operating	1970	2033	supercritical	bituminous					Duke Energy Carolinas [100%]	Duke Energy Corp [100.0%]	35.5979	-80.9612	exact	Terrell	Catawba		North Carolina	https://www.gem.wiki/Marshall_Steam_Station	L100000104082	G100000106699	US26441C2044	1	1996	1996	54	2010	2050	2090	648	648	648	648	648	648	648	648	648	648	648	648
coal	United States	Americas	Northern America	Mayo Generating Plant	Unit 1			735.8	operating	1983	2028	subcritical	bituminous					Duke Energy Progress [100%]	Duke Energy Corp [100.0%]	36.5278	-78.8919	exact	Bethel Hill	Person		North Carolina	https://www.gem.wiki/Mayo_Generating_Plant	L100000104083	G100000106764	US26441C2044	1	735.8	735.8	41	2023	2063	2103	735.8	735.8	735.8	735.8	735.8	735.8	735.8	735.8	735.8	735.8	735.8	735.8
coal	United States	Americas	Northern America	Miami Fort Station	Unit 7			557.1	operating	1975	2027	subcritical	bituminous					Luminant Miami Fort [100%]	Duke Energy Corp; Vistra Corp	39.1131	-84.8029	exact	North Bend	Hamilton		Ohio	https://www.gem.wiki/Miami_Fort_Station	L100000104113	G100000106903	US26441C2044	1	1114.2		49	2015	2055	2095	557.1	557.1	557.1	557.1	557.1	557.1	557.1	557.1	557.1	557.1	557.1	557.1
coal	United States	Americas	Northern America	Miami Fort Station	Unit 8			557.1	operating	1978	2027	subcritical	bituminous					Luminant Miami Fort [100%]	Duke Energy Corp; Vistra Corp	39.1131	-84.8029	exact	North Bend	Hamilton		Ohio	https://www.gem.wiki/Miami_Fort_Station	L100000104113	G100000106904	US26441C2044	1	1114.2	1114.2	46	2018	2058	2098	557.1	557.1	557.1	557.1	557.1	557.1	557.1	557.1	557.1	557.1	557.1	557.1
coal	United States	Americas	Northern America	Roxboro Steam Plant	Unit 1			410.8	operating	1966	2028	subcritical	bituminous					Duke Energy Progress [100%]	Duke Energy Corp [100.0%]	36.4841	-79.0722	exact	Roxboro	Person		North Carolina	https://www.gem.wiki/Roxboro_Steam_Plant	L100000104086	G100000108650	US26441C2044	1	2558.2		58	2006	2046	2086	410.8	410.8	410.8	410.8	410.8	410.8	410.8	410.8	410.8	410.8	410.8	410.8
coal	United States	Americas	Northern America	Roxboro Steam Plant	Unit 2			657	operating	1968	2028	subcritical	bituminous					Duke Energy Progress [100%]	Duke Energy Corp [100.0%]	36.4841	-79.0722	exact	Roxboro	Person		North Carolina	https://www.gem.wiki/Roxboro_Steam_Plant	L100000104086	G100000108651	US26441C2044	1	2558.2		56	2008	2048	2088	657	657	657	657	657	657	657	657	657	657	657	657
coal	United States	Americas	Northern America	Roxboro Steam Plant	Unit 3			745.2	operating	1973	2029	subcritical	bituminous					Duke Energy Progress [100%]	Duke Energy Corp [100.0%]	36.4841	-79.0722	exact	Roxboro	Person		North Carolina	https://www.gem.wiki/Roxboro_Steam_Plant	L100000104086	G100000108652	US26441C2044	1	2558.2		51	2013	2053	2093	745.2	745.2	745.2	745.2	745.2	745.2	745.2	745.2	745.2	745.2	745.2	745.2
coal	United States	Americas	Northern America	Roxboro Steam Plant	Unit 4			745.2	operating	1980	2029	subcritical	bituminous					Duke Energy Progress [100%]	Duke Energy Corp [100.0%]	36.4841	-79.0722	exact	Roxboro	Person		North Carolina	https://www.gem.wiki/Roxboro_Steam_Plant	L100000104086	G100000108653	US26441C2044	1	2558.2	2558.2	44	2020	2060	2100	745.2	745.2	745.2	745.2	745.2	745.2	745.2	745.2	745.2	745.2	745.2	745.2
oil/gas	United States	Americas	Northern America	Anclote power station	1			556	operating	1974		ST	NG/FO					Duke Energy Florida LLC [100.0%]	Duke Energy Corp [100.0%]	28.1844	-82.7886	exact	Holiday	Pasco		Florida	https://www.gem.wiki/Anclote_power_station	L100000401865	G100000402735	US26441C2044	1	1112		50	2014	2054	2094	556	556	556	556	556	556	556	556	556	556	556	556
oil/gas	United States	Americas	Northern America	Anclote power station	2			556	operating	1978		ST	NG/FO					Duke Energy Florida LLC [100.0%]	Duke Energy Corp [100.0%]	28.1844	-82.7886	exact	Holiday	Pasco		Florida	https://www.gem.wiki/Anclote_power_station	L100000401865	G100000402736	US26441C2044	1	1112	1112	46	2018	2058	2098	556	556	556	556	556	556	556	556	556	556	556	556
oil/gas	United States	Americas	Northern America	Asheville Plant	GT1			212	operating	1999		GT	NG/FO					Duke Energy Progress LLC [100.0%]	Duke Energy Corp [100.0%]	35.4731	-82.5417	exact	Arden	Buncombe		North Carolina	https://www.gem.wiki/Asheville_Plant	L100000104071	G100000402774	US26441C2044	1	1012		25	2039	2079	2119	212	212	212	212	212	212	212	212	212	212	212	212
oil/gas	United States	Americas	Northern America	Asheville Plant	GT2			212	operating	2000		GT	NG/FO					Duke Energy Progress LLC [100.0%]	Duke Energy Corp [100.0%]	35.4731	-82.5417	exact	Arden	Buncombe		North Carolina	https://www.gem.wiki/Asheville_Plant	L100000104071	G100000402775	US26441C2044	1	1012		24	2040	2080	2120	212	212	212	212	212	212	212	212	212	212	212	212
oil/gas	United States	Americas	Northern America	Asheville Plant	CC1			294	operating	2019		CC	NG/FO					Duke Energy Progress LLC [100.0%]	Duke Energy Corp [100.0%]	35.4731	-82.5417	exact	Arden	Buncombe		North Carolina	https://www.gem.wiki/Asheville_Plant	L100000104071	G100000401653	US26441C2044	1	1012		5	2059	2099	2139	294	294	294	294	294	294	294	294	294	294	294	294
oil/gas	United States	Americas	Northern America	Asheville Plant	CC2			294	operating	2020		CC	NG/FO					Duke Energy Progress LLC [100.0%]	Duke Energy Corp [100.0%]	35.4731	-82.5417	exact	Arden	Buncombe		North Carolina	https://www.gem.wiki/Asheville_Plant	L100000104071	G100000401654	US26441C2044	1	1012	1012	4	2060	2100	2140	294	294	294	294	294	294	294	294	294	294	294	294
oil/gas	United States	Americas	Northern America	Bayboro power station	P1			56.7	operating	1973		GT	FO					Duke Energy Florida LLC [100.0%]	Duke Energy Corp [100.0%]	27.7581	-82.6353	exact	St. Petersburg	Pinellas		Florida	https://www.gem.wiki/Bayboro_power_station	L100000409200	G100000414308	US26441C2044	1	226.8		51	2013	2053	2093	56.7	56.7	56.7	56.7	56.7	56.7	56.7	56.7	56.7	56.7	56.7	56.7
oil/gas	United States	Americas	Northern America	Bayboro power station	P2			56.7	operating	1973		GT	FO					Duke Energy Florida LLC [100.0%]	Duke Energy Corp [100.0%]	27.7581	-82.6353	exact	St. Petersburg	Pinellas		Florida	https://www.gem.wiki/Bayboro_power_station	L100000409200	G100000414307	US26441C2044	1	226.8		51	2013	2053	2093	56.7	56.7	56.7	56.7	56.7	56.7	56.7	56.7	56.7	56.7	56.7	56.7
oil/gas	United States	Americas	Northern America	Bayboro power station	P3			56.7	operating	1973		GT	FO					Duke Energy Florida LLC [100.0%]	Duke Energy Corp [100.0%]	27.7581	-82.6353	exact	St. Petersburg	Pinellas		Florida	https://www.gem.wiki/Bayboro_power_station	L100000409200	G100000414306	US26441C2044	1	226.8		51	2013	2053	2093	56.7	56.7	56.7	56.7	56.7	56.7	56.7	56.7	56.7	56.7	56.7	56.7
oil/gas	United States	Americas	Northern America	Bayboro power station	P4			56.7	operating	1973		GT	FO					Duke Energy Florida LLC [100.0%]	Duke Energy Corp [100.0%]	27.7581	-82.6353	exact	St. Petersburg	Pinellas		Florida	https://www.gem.wiki/Bayboro_power_station	L100000409200	G100000414305	US26441C2044	1	226.8	226.8	51	2013	2053	2093	56.7	56.7	56.7	56.7	56.7	56.7	56.7	56.7	56.7	56.7	56.7	56.7
oil/gas	United States	Americas	Northern America	Buck Steam Station	CC1			698	operating	2011		CC	NG/FO					Duke Energy Carolinas LLC [100.0%]	Duke Energy Corp [100.0%]	35.7133	-80.3767	exact	Salisbury	Rowan		North Carolina	https://www.gem.wiki/Buck_Steam_Station	L100000104073	G100000401655	US26441C2044	1	698	698	13	2051	2091	2131	698	698	698	698	698	698	698	698	698	698	698	698
oil/gas	United States	Americas	Northern America	Cayuga Generating Station	4			113	operating	1993		GT	FO/NG					Duke Energy Indiana LLC [100.0%]	Duke Energy Corp [100.0%]	39.9242	-87.4244	exact	Cayuga	Vermillion		Indiana	https://www.gem.wiki/Cayuga_Generating_Station	L100000103880	G100000402752	US26441C2044	1	1175	1175	31	2033	2073	2113	113	113	113	113	113	113	113	113	113	113	113	113
oil/gas	United States	Americas	Northern America	Crystal River Energy Complex	CC1		Citrus CC power station	985	operating	2018		CC	NG					Duke Energy Florida LLC [100.0%]	Duke Energy Corp [100.0%]	28.9656	-82.6977	exact	Crystal River	Citrus		Florida	https://www.gem.wiki/Crystal_River_Energy_Complex	L100000103825	G100000402124	US26441C2044	1	3448.4		6	2058	2098	2138	985	985	985	985	985	985	985	985	985	985	985	985
oil/gas	United States	Americas	Northern America	Crystal River Energy Complex	CC2		Citrus CC power station	985	operating	2018		CC	NG					Duke Energy Florida LLC [100.0%]	Duke Energy Corp [100.0%]	28.9656	-82.6977	exact	Crystal River	Citrus		Florida	https://www.gem.wiki/Crystal_River_Energy_Complex	L100000103825	G100000402125	US26441C2044	1	3448.4	3448.4	6	2058	2098	2138	985	985	985	985	985	985	985	985	985	985	985	985
oil/gas	United States	Americas	Northern America	Dan River Steam Station	CC1			698	operating	2012		CC	NG					Duke Energy Carolinas LLC [100.0%]	Duke Energy Corp [100.0%]	36.4862	-79.7208	exact	Eden	Rockingham		North Carolina	https://www.gem.wiki/Dan_River_Steam_Station	L100000104076	G100000401656	US26441C2044	1	698	698	12	2052	2092	2132	698	698	698	698	698	698	698	698	698	698	698	698
oil/gas	United States	Americas	Northern America	Darlington County power station	12			158	operating	1997		GT	NG/FO					Duke Energy Progress LLC [100.0%]	Duke Energy Corp [100.0%]	34.4185	-80.1657	exact	Hartsville	Darlington		South Carolina	https://www.gem.wiki/Darlington_County_power_station	L100000401882	G100000402777	US26441C2044	1	316		27	2037	2077	2117	158	158	158	158	158	158	158	158	158	158	158	158
oil/gas	United States	Americas	Northern America	Darlington County power station	13			158	operating	1997		GT	NG/FO					Duke Energy Progress LLC [100.0%]	Duke Energy Corp [100.0%]	34.4185	-80.1657	exact	Hartsville	Darlington		South Carolina	https://www.gem.wiki/Darlington_County_power_station	L100000401882	G100000402778	US26441C2044	1	316	316	27	2037	2077	2117	158	158	158	158	158	158	158	158	158	158	158	158
oil/gas	United States	Americas	Northern America	DeBary power station	3			66.8	operating	1975		GT	FO					Duke Energy Florida LLC [100.0%]	Duke Energy Corp [100.0%]	28.9039	-81.3323	exact	DeBary	Volusia		Florida	https://www.gem.wiki/DeBary_power_station	L100000401867	G100000414280	US26441C2044	1	749.5		49	2015	2055	2095	66.8	66.8	66.8	66.8	66.8	66.8	66.8	66.8	66.8	66.8	66.8	66.8
oil/gas	United States	Americas	Northern America	DeBary power station	5			66.8	operating	1975		GT	FO					Duke Energy Florida LLC [100.0%]	Duke Energy Corp [100.0%]	28.9039	-81.3323	exact	DeBary	Volusia		Florida	https://www.gem.wiki/DeBary_power_station	L100000401867	G100000414278	US26441C2044	1	749.5		49	2015	2055	2095	66.8	66.8	66.8	66.8	66.8	66.8	66.8	66.8	66.8	66.8	66.8	66.8
oil/gas	United States	Americas	Northern America	DeBary power station	2			66.8	operating	1976		GT	FO					Duke Energy Florida LLC [100.0%]	Duke Energy Corp [100.0%]	28.9039	-81.3323	exact	DeBary	Volusia		Florida	https://www.gem.wiki/DeBary_power_station	L100000401867	G100000414281	US26441C2044	1	749.5		48	2016	2056	2096	66.8	66.8	66.8	66.8	66.8	66.8	66.8	66.8	66.8	66.8	66.8	66.8
oil/gas	United States	Americas	Northern America	DeBary power station	4			66.8	operating	1976		GT	FO					Duke Energy Florida LLC [100.0%]	Duke Energy Corp [100.0%]	28.9039	-81.3323	exact	DeBary	Volusia		Florida	https://www.gem.wiki/DeBary_power_station	L100000401867	G100000414279	US26441C2044	1	749.5		48	2016	2056	2096	66.8	66.8	66.8	66.8	66.8	66.8	66.8	66.8	66.8	66.8	66.8	66.8
oil/gas	United States	Americas	Northern America	DeBary power station	6			66.8	operating	1976		GT	FO					Duke Energy Florida LLC [100.0%]	Duke Energy Corp [100.0%]	28.9039	-81.3323	exact	DeBary	Volusia		Florida	https://www.gem.wiki/DeBary_power_station	L100000401867	G100000414277	US26441C2044	1	749.5		48	2016	2056	2096	66.8	66.8	66.8	66.8	66.8	66.8	66.8	66.8	66.8	66.8	66.8	66.8
oil/gas	United States	Americas	Northern America	DeBary power station	7			104	operating	1992		GT	NG/FO					Duke Energy Florida LLC [100.0%]	Duke Energy Corp [100.0%]	28.9039	-81.3323	exact	DeBary	Volusia		Florida	https://www.gem.wiki/DeBary_power_station	L100000401867	G100000402737	US26441C2044	1	749.5		32	2032	2072	2112	104	104	104	104	104	104	104	104	104	104	104	104
oil/gas	United States	Americas	Northern America	DeBary power station	8			104	operating	1992		GT	NG/FO					Duke Energy Florida LLC [100.0%]	Duke Energy Corp [100.0%]	28.9039	-81.3323	exact	DeBary	Volusia		Florida	https://www.gem.wiki/DeBary_power_station	L100000401867	G100000402738	US26441C2044	1	749.5		32	2032	2072	2112	104	104	104	104	104	104	104	104	104	104	104	104
oil/gas	United States	Americas	Northern America	DeBary power station	9			104	operating	1992		GT	NG/FO					Duke Energy Florida LLC [100.0%]	Duke Energy Corp [100.0%]	28.9039	-81.3323	exact	DeBary	Volusia		Florida	https://www.gem.wiki/DeBary_power_station	L100000401867	G100000402739	US26441C2044	1	749.5		32	2032	2072	2112	104	104	104	104	104	104	104	104	104	104	104	104
oil/gas	United States	Americas	Northern America	DeBary power station	10			103.5	operating	1992		GT	FO					Duke Energy Florida LLC [100.0%]	Duke Energy Corp [100.0%]	28.9039	-81.3323	exact	DeBary	Volusia		Florida	https://www.gem.wiki/DeBary_power_station	L100000401867	G100000414282	US26441C2044	1	749.5	749.5	32	2032	2072	2112	103.5	103.5	103.5	103.5	103.5	103.5	103.5	103.5	103.5	103.5	103.5	103.5
oil/gas	United States	Americas	Northern America	Henry County power station	1			61	operating	2001		GT	NG					Duke Energy Indiana LLC [100.0%]	Duke Energy Corp [100.0%]	39.9528	-85.5039	exact	New Castle	Henry		Indiana	https://www.gem.wiki/Henry_County_power_station	L100000401876	G100000402753	US26441C2044	1	183		23	2041	2081	2121	61	61	61	61	61	61	61	61	61	61	61	61
oil/gas	United States	Americas	Northern America	Henry County power station	2			61	operating	2001		GT	NG					Duke Energy Indiana LLC [100.0%]	Duke Energy Corp [100.0%]	39.9528	-85.5039	exact	New Castle	Henry		Indiana	https://www.gem.wiki/Henry_County_power_station	L100000401876	G100000402754	US26441C2044	1	183		23	2041	2081	2121	61	61	61	61	61	61	61	61	61	61	61	61
oil/gas	United States	Americas	Northern America	Henry County power station	3			61	operating	2001		GT	NG					Duke Energy Indiana LLC [100.0%]	Duke Energy Corp [100.0%]	39.9528	-85.5039	exact	New Castle	Henry		Indiana	https://www.gem.wiki/Henry_County_power_station	L100000401876	G100000402755	US26441C2044	1	183	183	23	2041	2081	2121	61	61	61	61	61	61	61	61	61	61	61	61
oil/gas	United States	Americas	Northern America	Hines energy complex	E100			547	operating	1999		CC	NG/FO					Duke Energy Florida LLC [100.0%]	Duke Energy Corp [100.0%]	27.7882	-81.87	exact	Bartow	Polk		Florida	https://www.gem.wiki/Hines_energy_complex	L100000401868	G100000402149	US26441C2044	1	2267		25	2039	2079	2119	547	547	547	547	547	547	547	547	547	547	547	547
oil/gas	United States	Americas	Northern America	Hines energy complex	F110			548	operating	2003		CC	NG/FO					Duke Energy Florida LLC [100.0%]	Duke Energy Corp [100.0%]	27.7882	-81.87	exact	Bartow	Polk		Florida	https://www.gem.wiki/Hines_energy_complex	L100000401868	G100000402150	US26441C2044	1	2267		21	2043	2083	2123	548	548	548	548	548	548	548	548	548	548	548	548
oil/gas	United States	Americas	Northern America	Hines energy complex	G301			561	operating	2005		CC	NG/FO					Duke Energy Florida LLC [100.0%]	Duke Energy Corp [100.0%]	27.7882	-81.87	exact	Bartow	Polk		Florida	https://www.gem.wiki/Hines_energy_complex	L100000401868	G100000402151	US26441C2044	1	2267		19	2045	2085	2125	561	561	561	561	561	561	561	561	561	561	561	561
oil/gas	United States	Americas	Northern America	Hines energy complex	H400			611	operating	2007		CC	NG/FO					Duke Energy Florida LLC [100.0%]	Duke Energy Corp [100.0%]	27.7882	-81.87	exact	Bartow	Polk		Florida	https://www.gem.wiki/Hines_energy_complex	L100000401868	G100000402152	US26441C2044	1	2267	2267	17	2047	2087	2127	611	611	611	611	611	611	611	611	611	611	611	611
oil/gas	United States	Americas	Northern America	Intercession City power station	P1			56.7	operating	1974		GT	FO					Duke Energy Florida LLC [100.0%]	Duke Energy Corp [100.0%]	28.2628	-81.5486	exact	Intercession City	Osceola		Florida	https://www.gem.wiki/Intercession_City_power_station	L100000401869	G100000414258	US26441C2044	1	1198.7		50	2014	2054	2094	56.7	56.7	56.7	56.7	56.7	56.7	56.7	56.7	56.7	56.7	56.7	56.7
oil/gas	United States	Americas	Northern America	Intercession City power station	P2			56.7	operating	1974		GT	FO					Duke Energy Florida LLC [100.0%]	Duke Energy Corp [100.0%]	28.2628	-81.5486	exact	Intercession City	Osceola		Florida	https://www.gem.wiki/Intercession_City_power_station	L100000401869	G100000414257	US26441C2044	1	1198.7		50	2014	2054	2094	56.7	56.7	56.7	56.7	56.7	56.7	56.7	56.7	56.7	56.7	56.7	56.7
oil/gas	United States	Americas	Northern America	Intercession City power station	P3			56.7	operating	1974		GT	FO					Duke Energy Florida LLC [100.0%]	Duke Energy Corp [100.0%]	28.2628	-81.5486	exact	Intercession City	Osceola		Florida	https://www.gem.wiki/Intercession_City_power_station	L100000401869	G100000414256	US26441C2044	1	1198.7		50	2014	2054	2094	56.7	56.7	56.7	56.7	56.7	56.7	56.7	56.7	56.7	56.7	56.7	56.7
oil/gas	United States	Americas	Northern America	Intercession City power station	P4			56.7	operating	1974		GT	FO					Duke Energy Florida LLC [100.0%]	Duke Energy Corp [100.0%]	28.2628	-81.5486	exact	Intercession City	Osceola		Florida	https://www.gem.wiki/Intercession_City_power_station	L100000401869	G100000414255	US26441C2044	1	1198.7		50	2014	2054	2094	56.7	56.7	56.7	56.7	56.7	56.7	56.7	56.7	56.7	56.7	56.7	56.7
oil/gas	United States	Americas	Northern America	Intercession City power station	P5			56.7	operating	1974		GT	FO					Duke Energy Florida LLC [100.0%]	Duke Energy Corp [100.0%]	28.2628	-81.5486	exact	Intercession City	Osceola		Florida	https://www.gem.wiki/Intercession_City_power_station	L100000401869	G100000414254	US26441C2044	1	1198.7		50	2014	2054	2094	56.7	56.7	56.7	56.7	56.7	56.7	56.7	56.7	56.7	56.7	56.7	56.7
oil/gas	United States	Americas	Northern America	Intercession City power station	P6			56.7	operating	1974		GT	FO					Duke Energy Florida LLC [100.0%]	Duke Energy Corp [100.0%]	28.2628	-81.5486	exact	Intercession City	Osceola		Florida	https://www.gem.wiki/Intercession_City_power_station	L100000401869	G100000414253	US26441C2044	1	1198.7		50	2014	2054	2094	56.7	56.7	56.7	56.7	56.7	56.7	56.7	56.7	56.7	56.7	56.7	56.7
oil/gas	United States	Americas	Northern America	Intercession City power station	P10			104	operating	1993		GT	NG/FO					Duke Energy Florida LLC [100.0%]	Duke Energy Corp [100.0%]	28.2628	-81.5486	exact	Intercession City	Osceola		Florida	https://www.gem.wiki/Intercession_City_power_station	L100000401869	G100000402740	US26441C2044	1	1198.7		31	2033	2073	2113	104	104	104	104	104	104	104	104	104	104	104	104
oil/gas	United States	Americas	Northern America	Intercession City power station	P7			104	operating	1993		GT	NG/FO					Duke Energy Florida LLC [100.0%]	Duke Energy Corp [100.0%]	28.2628	-81.5486	exact	Intercession City	Osceola		Florida	https://www.gem.wiki/Intercession_City_power_station	L100000401869	G100000402744	US26441C2044	1	1198.7		31	2033	2073	2113	104	104	104	104	104	104	104	104	104	104	104	104
oil/gas	United States	Americas	Northern America	Intercession City power station	P8			104	operating	1993		GT	NG/FO					Duke Energy Florida LLC [100.0%]	Duke Energy Corp [100.0%]	28.2628	-81.5486	exact	Intercession City	Osceola		Florida	https://www.gem.wiki/Intercession_City_power_station	L100000401869	G100000402745	US26441C2044	1	1198.7		31	2033	2073	2113	104	104	104	104	104	104	104	104	104	104	104	104
oil/gas	United States	Americas	Northern America	Intercession City power station	P9			104	operating	1993		GT	NG/FO					Duke Energy Florida LLC [100.0%]	Duke Energy Corp [100.0%]	28.2628	-81.5486	exact	Intercession City	Osceola		Florida	https://www.gem.wiki/Intercession_City_power_station	L100000401869	G100000402746	US26441C2044	1	1198.7		31	2033	2073	2113	104	104	104	104	104	104	104	104	104	104	104	104
oil/gas	United States	Americas	Northern America	Intercession City power station	P11			148.5	operating	1997		GT	FO					Duke Energy Florida LLC [66.7%]; Georgia Power Co [33.3%]	Duke Energy Corp [66.7%]; Southern Co [33.3%]	28.2628	-81.5486	exact	Intercession City	Osceola		Florida	https://www.gem.wiki/Intercession_City_power_station	L100000401869	G100000414252	US26441C2044	0.667	1198.7		27	2037	2077	2117	99.0495	99.0495	99.0495	99.0495	99.0495	99.0495	99.0495	99.0495	99.0495	99.0495	99.0495	99.0495
oil/gas	United States	Americas	Northern America	Intercession City power station	P12			98	operating	2000		GT	NG/FO					Duke Energy Florida LLC [100.0%]	Duke Energy Corp [100.0%]	28.2628	-81.5486	exact	Intercession City	Osceola		Florida	https://www.gem.wiki/Intercession_City_power_station	L100000401869	G100000402741	US26441C2044	1	1198.7		24	2040	2080	2120	98	98	98	98	98	98	98	98	98	98	98	98
oil/gas	United States	Americas	Northern America	Intercession City power station	P13			98	operating	2000		GT	NG/FO					Duke Energy Florida LLC [100.0%]	Duke Energy Corp [100.0%]	28.2628	-81.5486	exact	Intercession City	Osceola		Florida	https://www.gem.wiki/Intercession_City_power_station	L100000401869	G100000402742	US26441C2044	1	1198.7		24	2040	2080	2120	98	98	98	98	98	98	98	98	98	98	98	98
oil/gas	United States	Americas	Northern America	Intercession City power station	P14			98	operating	2000		GT	NG/FO					Duke Energy Florida LLC [100.0%]	Duke Energy Corp [100.0%]	28.2628	-81.5486	exact	Intercession City	Osceola		Florida	https://www.gem.wiki/Intercession_City_power_station	L100000401869	G100000402743	US26441C2044	1	1198.7	1198.7	24	2040	2080	2120	98	98	98	98	98	98	98	98	98	98	98	98
oil/gas	United States	Americas	Northern America	James E. Rogers Energy Complex	6			909.5	operating	2018		ST	NG/C					Duke Energy Carolinas LLC [100.0%]	Duke Energy Corp [100.0%]	35.22	-81.7594	exact	Cliffside	Cleveland		North Carolina	https://www.gem.wiki/James_E._Rogers_Energy_Complex	L100000104075	G100000101609	US26441C2044	1	1530.5	1530.5	6	2058	2098	2138	909.5	909.5	909.5	909.5	909.5	909.5	909.5	909.5	909.5	909.5	909.5	909.5
oil/gas	United States	Americas	Northern America	L V Sutton Combined Cycle power station	1			730	operating	2013		CC	NG/FO					Duke Energy Progress LLC [100.0%]	Duke Energy Corp [100.0%]	34.2831	-77.9853	exact	Wilmington	New Hanover		North Carolina	https://www.gem.wiki/L_V_Sutton_Combined_Cycle_power_station	L100000401883	G100000402067	US26441C2044	1	852		11	2053	2093	2133	730	730	730	730	730	730	730	730	730	730	730	730
oil/gas	United States	Americas	Northern America	L V Sutton Combined Cycle power station	CT004			61	operating	2017		GT	NG/FO					Duke Energy Progress LLC [100.0%]	Duke Energy Corp [100.0%]	34.2831	-77.9853	exact	Wilmington	New Hanover		North Carolina	https://www.gem.wiki/L_V_Sutton_Combined_Cycle_power_station	L100000401883	G100000402781	US26441C2044	1	852		7	2057	2097	2137	61	61	61	61	61	61	61	61	61	61	61	61
oil/gas	United States	Americas	Northern America	L V Sutton Combined Cycle power station	CT005			61	operating	2017		GT	NG/FO					Duke Energy Progress LLC [100.0%]	Duke Energy Corp [100.0%]	34.2831	-77.9853	exact	Wilmington	New Hanover		North Carolina	https://www.gem.wiki/L_V_Sutton_Combined_Cycle_power_station	L100000401883	G100000402782	US26441C2044	1	852	852	7	2057	2097	2137	61	61	61	61	61	61	61	61	61	61	61	61
oil/gas	United States	Americas	Northern America	Lee Steam Plant	CC1		Lee Combined Cycle Plant	1068	operating	2012		CC	NG/FO					Duke Energy Progress LLC [100.0%]	Duke Energy Corp [100.0%]	35.3736	-78.0894	exact	Goldsboro	Wayne		North Carolina	https://www.gem.wiki/Lee_Steam_Plant	L100000104080	G100000402060	US26441C2044	1	1068	1068	12	2052	2092	2132	1068	1068	1068	1068	1068	1068	1068	1068	1068	1068	1068	1068
oil/gas	United States	Americas	Northern America	Lincoln Combustion power station	1			110	operating	1995		GT	NG/FO					Duke Energy Carolinas LLC [100.0%]	Duke Energy Corp [100.0%]	35.4317	-81.0347	exact	Stanley	Lincoln		North Carolina	https://www.gem.wiki/Lincoln_Combustion_power_station	L100000401861	G100000402703	US26441C2044	1	2296		29	2035	2075	2115	110	110	110	110	110	110	110	110	110	110	110	110
oil/gas	United States	Americas	Northern America	Lincoln Combustion power station	2			110	operating	1995		GT	NG/FO					Duke Energy Carolinas LLC [100.0%]	Duke Energy Corp [100.0%]	35.4317	-81.0347	exact	Stanley	Lincoln		North Carolina	https://www.gem.wiki/Lincoln_Combustion_power_station	L100000401861	G100000402711	US26441C2044	1	2296		29	2035	2075	2115	110	110	110	110	110	110	110	110	110	110	110	110
oil/gas	United States	Americas	Northern America	Lincoln Combustion power station	3			110	operating	1995		GT	NG/FO					Duke Energy Carolinas LLC [100.0%]	Duke Energy Corp [100.0%]	35.4317	-81.0347	exact	Stanley	Lincoln		North Carolina	https://www.gem.wiki/Lincoln_Combustion_power_station	L100000401861	G100000402712	US26441C2044	1	2296		29	2035	2075	2115	110	110	110	110	110	110	110	110	110	110	110	110
oil/gas	United States	Americas	Northern America	Lincoln Combustion power station	4			110	operating	1995		GT	NG/FO					Duke Energy Carolinas LLC [100.0%]	Duke Energy Corp [100.0%]	35.4317	-81.0347	exact	Stanley	Lincoln		North Carolina	https://www.gem.wiki/Lincoln_Combustion_power_station	L100000401861	G100000402713	US26441C2044	1	2296		29	2035	2075	2115	110	110	110	110	110	110	110	110	110	110	110	110
oil/gas	United States	Americas	Northern America	Lincoln Combustion power station	5			110	operating	1995		GT	NG/FO					Duke Energy Carolinas LLC [100.0%]	Duke Energy Corp [100.0%]	35.4317	-81.0347	exact	Stanley	Lincoln		North Carolina	https://www.gem.wiki/Lincoln_Combustion_power_station	L100000401861	G100000402714	US26441C2044	1	2296		29	2035	2075	2115	110	110	110	110	110	110	110	110	110	110	110	110
oil/gas	United States	Americas	Northern America	Lincoln Combustion power station	6			110	operating	1995		GT	NG/FO					Duke Energy Carolinas LLC [100.0%]	Duke Energy Corp [100.0%]	35.4317	-81.0347	exact	Stanley	Lincoln		North Carolina	https://www.gem.wiki/Lincoln_Combustion_power_station	L100000401861	G100000402715	US26441C2044	1	2296		29	2035	2075	2115	110	110	110	110	110	110	110	110	110	110	110	110
oil/gas	United States	Americas	Northern America	Lincoln Combustion power station	7			110	operating	1995		GT	NG/FO					Duke Energy Carolinas LLC [100.0%]	Duke Energy Corp [100.0%]	35.4317	-81.0347	exact	Stanley	Lincoln		North Carolina	https://www.gem.wiki/Lincoln_Combustion_power_station	L100000401861	G100000402716	US26441C2044	1	2296		29	2035	2075	2115	110	110	110	110	110	110	110	110	110	110	110	110
oil/gas	United States	Americas	Northern America	Lincoln Combustion power station	8			110	operating	1995		GT	NG/FO					Duke Energy Carolinas LLC [100.0%]	Duke Energy Corp [100.0%]	35.4317	-81.0347	exact	Stanley	Lincoln		North Carolina	https://www.gem.wiki/Lincoln_Combustion_power_station	L100000401861	G100000402717	US26441C2044	1	2296		29	2035	2075	2115	110	110	110	110	110	110	110	110	110	110	110	110
oil/gas	United States	Americas	Northern America	Lincoln Combustion power station	9			110	operating	1995		GT	NG/FO					Duke Energy Carolinas LLC [100.0%]	Duke Energy Corp [100.0%]	35.4317	-81.0347	exact	Stanley	Lincoln		North Carolina	https://www.gem.wiki/Lincoln_Combustion_power_station	L100000401861	G100000402718	US26441C2044	1	2296		29	2035	2075	2115	110	110	110	110	110	110	110	110	110	110	110	110
oil/gas	United States	Americas	Northern America	Lincoln Combustion power station	10			110	operating	1995		GT	NG/FO					Duke Energy Carolinas LLC [100.0%]	Duke Energy Corp [100.0%]	35.4317	-81.0347	exact	Stanley	Lincoln		North Carolina	https://www.gem.wiki/Lincoln_Combustion_power_station	L100000401861	G100000402704	US26441C2044	1	2296		29	2035	2075	2115	110	110	110	110	110	110	110	110	110	110	110	110
oil/gas	United States	Americas	Northern America	Lincoln Combustion power station	11			110	operating	1995		GT	NG/FO					Duke Energy Carolinas LLC [100.0%]	Duke Energy Corp [100.0%]	35.4317	-81.0347	exact	Stanley	Lincoln		North Carolina	https://www.gem.wiki/Lincoln_Combustion_power_station	L100000401861	G100000402705	US26441C2044	1	2296		29	2035	2075	2115	110	110	110	110	110	110	110	110	110	110	110	110
oil/gas	United States	Americas	Northern America	Lincoln Combustion power station	12			110	operating	1995		GT	NG/FO					Duke Energy Carolinas LLC [100.0%]	Duke Energy Corp [100.0%]	35.4317	-81.0347	exact	Stanley	Lincoln		North Carolina	https://www.gem.wiki/Lincoln_Combustion_power_station	L100000401861	G100000402706	US26441C2044	1	2296		29	2035	2075	2115	110	110	110	110	110	110	110	110	110	110	110	110
oil/gas	United States	Americas	Northern America	Lincoln Combustion power station	13			110	operating	1996		GT	NG/FO					Duke Energy Carolinas LLC [100.0%]	Duke Energy Corp [100.0%]	35.4317	-81.0347	exact	Stanley	Lincoln		North Carolina	https://www.gem.wiki/Lincoln_Combustion_power_station	L100000401861	G100000402707	US26441C2044	1	2296		28	2036	2076	2116	110	110	110	110	110	110	110	110	110	110	110	110
oil/gas	United States	Americas	Northern America	Lincoln Combustion power station	14			110	operating	1996		GT	NG/FO					Duke Energy Carolinas LLC [100.0%]	Duke Energy Corp [100.0%]	35.4317	-81.0347	exact	Stanley	Lincoln		North Carolina	https://www.gem.wiki/Lincoln_Combustion_power_station	L100000401861	G100000402708	US26441C2044	1	2296		28	2036	2076	2116	110	110	110	110	110	110	110	110	110	110	110	110
oil/gas	United States	Americas	Northern America	Lincoln Combustion power station	15			110	operating	1996		GT	NG/FO					Duke Energy Carolinas LLC [100.0%]	Duke Energy Corp [100.0%]	35.4317	-81.0347	exact	Stanley	Lincoln		North Carolina	https://www.gem.wiki/Lincoln_Combustion_power_station	L100000401861	G100000402709	US26441C2044	1	2296		28	2036	2076	2116	110	110	110	110	110	110	110	110	110	110	110	110
oil/gas	United States	Americas	Northern America	Lincoln Combustion power station	16			110	operating	1996		GT	NG/FO					Duke Energy Carolinas LLC [100.0%]	Duke Energy Corp [100.0%]	35.4317	-81.0347	exact	Stanley	Lincoln		North Carolina	https://www.gem.wiki/Lincoln_Combustion_power_station	L100000401861	G100000402710	US26441C2044	1	2296		28	2036	2076	2116	110	110	110	110	110	110	110	110	110	110	110	110
oil/gas	United States	Americas	Northern America	Lincoln Combustion power station	17			536	construction	2024		GT	NG/FO					Duke Energy Carolinas LLC [100.0%]	Duke Energy Corp [100.0%]	35.4317	-81.0347	exact	Stanley	Lincoln		North Carolina	https://www.gem.wiki/Lincoln_Combustion_power_station	L100000401861	G100000409461	US26441C2044	1	2296	2296	0	2064	2104	2144	0	0	0	0	536	536	536	536	536	536	536	536
oil/gas	United States	Americas	Northern America	Madison power station	CT1			87	operating	2000		GT	NG					Duke Energy Indiana LLC [100.0%]	Duke Energy Corp [100.0%]	39.4522	-84.4647	exact	Trenton	Butler		Ohio	https://www.gem.wiki/Madison_power_station	L100000401877	G100000402756	US26441C2044	1	696		24	2040	2080	2120	87	87	87	87	87	87	87	87	87	87	87	87
oil/gas	United States	Americas	Northern America	Madison power station	CT2			87	operating	2000		GT	NG					Duke Energy Indiana LLC [100.0%]	Duke Energy Corp [100.0%]	39.4522	-84.4647	exact	Trenton	Butler		Ohio	https://www.gem.wiki/Madison_power_station	L100000401877	G100000402757	US26441C2044	1	696		24	2040	2080	2120	87	87	87	87	87	87	87	87	87	87	87	87
oil/gas	United States	Americas	Northern America	Madison power station	CT3			87	operating	2000		GT	NG					Duke Energy Indiana LLC [100.0%]	Duke Energy Corp [100.0%]	39.4522	-84.4647	exact	Trenton	Butler		Ohio	https://www.gem.wiki/Madison_power_station	L100000401877	G100000402758	US26441C2044	1	696		24	2040	2080	2120	87	87	87	87	87	87	87	87	87	87	87	87
oil/gas	United States	Americas	Northern America	Madison power station	CT4			87	operating	2000		GT	NG					Duke Energy Indiana LLC [100.0%]	Duke Energy Corp [100.0%]	39.4522	-84.4647	exact	Trenton	Butler		Ohio	https://www.gem.wiki/Madison_power_station	L100000401877	G100000402759	US26441C2044	1	696		24	2040	2080	2120	87	87	87	87	87	87	87	87	87	87	87	87
oil/gas	United States	Americas	Northern America	Madison power station	CT5			87	operating	2000		GT	NG					Duke Energy Indiana LLC [100.0%]	Duke Energy Corp [100.0%]	39.4522	-84.4647	exact	Trenton	Butler		Ohio	https://www.gem.wiki/Madison_power_station	L100000401877	G100000402760	US26441C2044	1	696		24	2040	2080	2120	87	87	87	87	87	87	87	87	87	87	87	87
oil/gas	United States	Americas	Northern America	Madison power station	CT6			87	operating	2000		GT	NG					Duke Energy Indiana LLC [100.0%]	Duke Energy Corp [100.0%]	39.4522	-84.4647	exact	Trenton	Butler		Ohio	https://www.gem.wiki/Madison_power_station	L100000401877	G100000402761	US26441C2044	1	696		24	2040	2080	2120	87	87	87	87	87	87	87	87	87	87	87	87
oil/gas	United States	Americas	Northern America	Madison power station	CT7			87	operating	2000		GT	NG					Duke Energy Indiana LLC [100.0%]	Duke Energy Corp [100.0%]	39.4522	-84.4647	exact	Trenton	Butler		Ohio	https://www.gem.wiki/Madison_power_station	L100000401877	G100000402762	US26441C2044	1	696		24	2040	2080	2120	87	87	87	87	87	87	87	87	87	87	87	87
oil/gas	United States	Americas	Northern America	Madison power station	CT8			87	operating	2000		GT	NG					Duke Energy Indiana LLC [100.0%]	Duke Energy Corp [100.0%]	39.4522	-84.4647	exact	Trenton	Butler		Ohio	https://www.gem.wiki/Madison_power_station	L100000401877	G100000402763	US26441C2044	1	696	696	24	2040	2080	2120	87	87	87	87	87	87	87	87	87	87	87	87
oil/gas	United States	Americas	Northern America	Mill Creek (SC) power station	1			100	operating	2002		GT	NG/FO					Duke Energy Carolinas LLC [100.0%]	Duke Energy Corp [100.0%]	35.1597	-81.4306	exact	Blacksburg	Cherokee		South Carolina	https://www.gem.wiki/Mill_Creek_(SC)_power_station	L100000401862	G100000402719	US26441C2044	1	800		22	2042	2082	2122	100	100	100	100	100	100	100	100	100	100	100	100
oil/gas	United States	Americas	Northern America	Mill Creek (SC) power station	2			100	operating	2002		GT	NG/FO					Duke Energy Carolinas LLC [100.0%]	Duke Energy Corp [100.0%]	35.1597	-81.4306	exact	Blacksburg	Cherokee		South Carolina	https://www.gem.wiki/Mill_Creek_(SC)_power_station	L100000401862	G100000402720	US26441C2044	1	800		22	2042	2082	2122	100	100	100	100	100	100	100	100	100	100	100	100
oil/gas	United States	Americas	Northern America	Mill Creek (SC) power station	3			100	operating	2002		GT	NG/FO					Duke Energy Carolinas LLC [100.0%]	Duke Energy Corp [100.0%]	35.1597	-81.4306	exact	Blacksburg	Cherokee		South Carolina	https://www.gem.wiki/Mill_Creek_(SC)_power_station	L100000401862	G100000402721	US26441C2044	1	800		22	2042	2082	2122	100	100	100	100	100	100	100	100	100	100	100	100
oil/gas	United States	Americas	Northern America	Mill Creek (SC) power station	4			100	operating	2002		GT	NG/FO					Duke Energy Carolinas LLC [100.0%]	Duke Energy Corp [100.0%]	35.1597	-81.4306	exact	Blacksburg	Cherokee		South Carolina	https://www.gem.wiki/Mill_Creek_(SC)_power_station	L100000401862	G100000402722	US26441C2044	1	800		22	2042	2082	2122	100	100	100	100	100	100	100	100	100	100	100	100
oil/gas	United States	Americas	Northern America	Mill Creek (SC) power station	5			100	operating	2003		GT	NG/FO					Duke Energy Carolinas LLC [100.0%]	Duke Energy Corp [100.0%]	35.1597	-81.4306	exact	Blacksburg	Cherokee		South Carolina	https://www.gem.wiki/Mill_Creek_(SC)_power_station	L100000401862	G100000402723	US26441C2044	1	800		21	2043	2083	2123	100	100	100	100	100	100	100	100	100	100	100	100
oil/gas	United States	Americas	Northern America	Mill Creek (SC) power station	6			100	operating	2003		GT	NG/FO					Duke Energy Carolinas LLC [100.0%]	Duke Energy Corp [100.0%]	35.1597	-81.4306	exact	Blacksburg	Cherokee		South Carolina	https://www.gem.wiki/Mill_Creek_(SC)_power_station	L100000401862	G100000402724	US26441C2044	1	800		21	2043	2083	2123	100	100	100	100	100	100	100	100	100	100	100	100
oil/gas	United States	Americas	Northern America	Mill Creek (SC) power station	7			100	operating	2003		GT	NG/FO					Duke Energy Carolinas LLC [100.0%]	Duke Energy Corp [100.0%]	35.1597	-81.4306	exact	Blacksburg	Cherokee		South Carolina	https://www.gem.wiki/Mill_Creek_(SC)_power_station	L100000401862	G100000402725	US26441C2044	1	800		21	2043	2083	2123	100	100	100	100	100	100	100	100	100	100	100	100
oil/gas	United States	Americas	Northern America	Mill Creek (SC) power station	8			100	operating	2003		GT	NG/FO					Duke Energy Carolinas LLC [100.0%]	Duke Energy Corp [100.0%]	35.1597	-81.4306	exact	Blacksburg	Cherokee		South Carolina	https://www.gem.wiki/Mill_Creek_(SC)_power_station	L100000401862	G100000402726	US26441C2044	1	800	800	21	2043	2083	2123	100	100	100	100	100	100	100	100	100	100	100	100
oil/gas	United States	Americas	Northern America	Noblesville power station	CC1			283	operating	2003		CC	NG					Duke Energy Indiana LLC [100.0%]	Duke Energy Corp [100.0%]	40.0969	-85.9714	exact	Noblesville	Hamilton		Indiana	https://www.gem.wiki/Noblesville_power_station	L100000401878	G100000401582	US26441C2044	1	283	283	21	2043	2083	2123	283	283	283	283	283	283	283	283	283	283	283	283
oil/gas	United States	Americas	Northern America	Osprey energy center power plant	COEC			644	operating	2004		CC	NG					Duke Energy Florida LLC [100.0%]	Duke Energy Corp [100.0%]	28.0525	-81.8083	exact	Auburndale	Polk		Florida	https://www.gem.wiki/Osprey_energy_center_power_plant	L100000401870	G100000401919	US26441C2044	1	644	644	20	2044	2084	2124	644	644	644	644	644	644	644	644	644	644	644	644
oil/gas	United States	Americas	Northern America	P L Bartow power station	P1			55.4	operating	1972		GT	FO					Duke Energy Florida LLC [100.0%]	Duke Energy Corp [100.0%]	27.8595	-82.6018	exact	St. Petersburg	Pinellas		Florida	https://www.gem.wiki/P_L_Bartow_power_station	L100000401871	G100000414219	US26441C2044	1	1474.8		52	2012	2052	2092	55.4	55.4	55.4	55.4	55.4	55.4	55.4	55.4	55.4	55.4	55.4	55.4
oil/gas	United States	Americas	Northern America	P L Bartow power station	P2			55	operating	1972		GT	NG/FO					Duke Energy Florida LLC [100.0%]	Duke Energy Corp [100.0%]	27.8595	-82.6018	exact	St. Petersburg	Pinellas		Florida	https://www.gem.wiki/P_L_Bartow_power_station	L100000401871	G100000402747	US26441C2044	1	1474.8		52	2012	2052	2092	55	55	55	55	55	55	55	55	55	55	55	55
oil/gas	United States	Americas	Northern America	P L Bartow power station	P3			55.4	operating	1972		GT	FO					Duke Energy Florida LLC [100.0%]	Duke Energy Corp [100.0%]	27.8595	-82.6018	exact	St. Petersburg	Pinellas		Florida	https://www.gem.wiki/P_L_Bartow_power_station	L100000401871	G100000414218	US26441C2044	1	1474.8		52	2012	2052	2092	55.4	55.4	55.4	55.4	55.4	55.4	55.4	55.4	55.4	55.4	55.4	55.4
oil/gas	United States	Americas	Northern America	P L Bartow power station	P4			55	operating	1972		GT	NG/FO					Duke Energy Florida LLC [100.0%]	Duke Energy Corp [100.0%]	27.8595	-82.6018	exact	St. Petersburg	Pinellas		Florida	https://www.gem.wiki/P_L_Bartow_power_station	L100000401871	G100000402748	US26441C2044	1	1474.8		52	2012	2052	2092	55	55	55	55	55	55	55	55	55	55	55	55
oil/gas	United States	Americas	Northern America	P L Bartow power station	G981			1254	operating	2009		CC	NG/FO					Duke Energy Florida LLC [100.0%]	Duke Energy Corp [100.0%]	27.8595	-82.6018	exact	St. Petersburg	Pinellas		Florida	https://www.gem.wiki/P_L_Bartow_power_station	L100000401871	G100000402127	US26441C2044	1	1474.8	1474.8	15	2049	2089	2129	1254	1254	1254	1254	1254	1254	1254	1254	1254	1254	1254	1254
oil/gas	United States	Americas	Northern America	Rockingham County CT Station	CT1			196	mothballed	2000		GT	NG/FO					Duke Energy Carolinas LLC [100.0%]	Duke Energy Corp [100.0%]	36.3297	-79.8297	exact	Reidsville	Rockingham		North Carolina	https://www.gem.wiki/Rockingham_County_CT_Station	L100000401863	G100000402727	US26441C2044	1	980		24	2040	2080	2120	0	0	0	0	0	0	0	0	0	0	0	0
oil/gas	United States	Americas	Northern America	Rockingham County CT Station	CT2			196	mothballed	2000		GT	NG/FO					Duke Energy Carolinas LLC [100.0%]	Duke Energy Corp [100.0%]	36.3297	-79.8297	exact	Reidsville	Rockingham		North Carolina	https://www.gem.wiki/Rockingham_County_CT_Station	L100000401863	G100000402728	US26441C2044	1	980		24	2040	2080	2120	0	0	0	0	0	0	0	0	0	0	0	0
oil/gas	United States	Americas	Northern America	Rockingham County CT Station	CT3			196	mothballed	2000		GT	NG/FO					Duke Energy Carolinas LLC [100.0%]	Duke Energy Corp [100.0%]	36.3297	-79.8297	exact	Reidsville	Rockingham		North Carolina	https://www.gem.wiki/Rockingham_County_CT_Station	L100000401863	G100000402729	US26441C2044	1	980		24	2040	2080	2120	0	0	0	0	0	0	0	0	0	0	0	0
oil/gas	United States	Americas	Northern America	Rockingham County CT Station	CT4			196	mothballed	2000		GT	NG/FO					Duke Energy Carolinas LLC [100.0%]	Duke Energy Corp [100.0%]	36.3297	-79.8297	exact	Reidsville	Rockingham		North Carolina	https://www.gem.wiki/Rockingham_County_CT_Station	L100000401863	G100000402730	US26441C2044	1	980		24	2040	2080	2120	0	0	0	0	0	0	0	0	0	0	0	0
oil/gas	United States	Americas	Northern America	Rockingham County CT Station	CT5			196	mothballed	2000		GT	NG/FO					Duke Energy Carolinas LLC [100.0%]	Duke Energy Corp [100.0%]	36.3297	-79.8297	exact	Reidsville	Rockingham		North Carolina	https://www.gem.wiki/Rockingham_County_CT_Station	L100000401863	G100000402731	US26441C2044	1	980	980	24	2040	2080	2120	0	0	0	0	0	0	0	0	0	0	0	0
oil/gas	United States	Americas	Northern America	Sherwood H Smith Jr energy complex	1			199	operating	2001		GT	FO/NG					Duke Energy Progress LLC [100.0%]	Duke Energy Corp [100.0%]	34.8392	-79.7406	exact	Hamlet	Richmond		North Carolina	https://www.gem.wiki/Sherwood_H_Smith_Jr_energy_complex	L100000401885	G100000402783	US26441C2044	1	2243		23	2041	2081	2121	199	199	199	199	199	199	199	199	199	199	199	199
oil/gas	United States	Americas	Northern America	Sherwood H Smith Jr energy complex	2			199	operating	2001		GT	FO/NG					Duke Energy Progress LLC [100.0%]	Duke Energy Corp [100.0%]	34.8392	-79.7406	exact	Hamlet	Richmond		North Carolina	https://www.gem.wiki/Sherwood_H_Smith_Jr_energy_complex	L100000401885	G100000402784	US26441C2044	1	2243		23	2041	2081	2121	199	199	199	199	199	199	199	199	199	199	199	199
oil/gas	United States	Americas	Northern America	Sherwood H Smith Jr energy complex	3			199	operating	2001		GT	FO/NG					Duke Energy Progress LLC [100.0%]	Duke Energy Corp [100.0%]	34.8392	-79.7406	exact	Hamlet	Richmond		North Carolina	https://www.gem.wiki/Sherwood_H_Smith_Jr_energy_complex	L100000401885	G100000402785	US26441C2044	1	2243		23	2041	2081	2121	199	199	199	199	199	199	199	199	199	199	199	199
oil/gas	United States	Americas	Northern America	Sherwood H Smith Jr energy complex	4			199	operating	2001		GT	FO/NG					Duke Energy Progress LLC [100.0%]	Duke Energy Corp [100.0%]	34.8392	-79.7406	exact	Hamlet	Richmond		North Carolina	https://www.gem.wiki/Sherwood_H_Smith_Jr_energy_complex	L100000401885	G100000402786	US26441C2044	1	2243		23	2041	2081	2121	199	199	199	199	199	199	199	199	199	199	199	199
oil/gas	United States	Americas	Northern America	Sherwood H Smith Jr energy complex	6			199	operating	2002		GT	NG/FO					Duke Energy Progress LLC [100.0%]	Duke Energy Corp [100.0%]	34.8392	-79.7406	exact	Hamlet	Richmond		North Carolina	https://www.gem.wiki/Sherwood_H_Smith_Jr_energy_complex	L100000401885	G100000402787	US26441C2044	1	2243		22	2042	2082	2122	199	199	199	199	199	199	199	199	199	199	199	199
oil/gas	United States	Americas	Northern America	Sherwood H Smith Jr energy complex	CC1			594	operating	2002		CC	NG/FO					Duke Energy Progress LLC [100.0%]	Duke Energy Corp [100.0%]	34.8392	-79.7406	exact	Hamlet	Richmond		North Carolina	https://www.gem.wiki/Sherwood_H_Smith_Jr_energy_complex	L100000401885	G100000402172	US26441C2044	1	2243		22	2042	2082	2122	594	594	594	594	594	594	594	594	594	594	594	594
oil/gas	United States	Americas	Northern America	Sherwood H Smith Jr energy complex	CC2			654	operating	2011		CC	NG/FO					Duke Energy Progress LLC [100.0%]	Duke Energy Corp [100.0%]	34.8392	-79.7406	exact	Hamlet	Richmond		North Carolina	https://www.gem.wiki/Sherwood_H_Smith_Jr_energy_complex	L100000401885	G100000402173	US26441C2044	1	2243	2243	13	2051	2091	2131	654	654	654	654	654	654	654	654	654	654	654	654
oil/gas	United States	Americas	Northern America	Suwannee River power station	P1			66	operating	1980		GT	NG/FO					Duke Energy Florida LLC [100.0%]	Duke Energy Corp [100.0%]	30.3764	-83.1806	exact	Live Oak	Suwannee		Florida	https://www.gem.wiki/Suwannee_River_power_station	L100000401872	G100000402749	US26441C2044	1	197.9		44	2020	2060	2100	66	66	66	66	66	66	66	66	66	66	66	66
oil/gas	United States	Americas	Northern America	Suwannee River power station	P2			65.9	operating	1980		GT	FO					Duke Energy Florida LLC [100.0%]	Duke Energy Corp [100.0%]	30.3764	-83.1806	exact	Live Oak	Suwannee		Florida	https://www.gem.wiki/Suwannee_River_power_station	L100000401872	G100000414184	US26441C2044	1	197.9		44	2020	2060	2100	65.9	65.9	65.9	65.9	65.9	65.9	65.9	65.9	65.9	65.9	65.9	65.9
oil/gas	United States	Americas	Northern America	Suwannee River power station	P3			66	operating	1980		GT	NG/FO					Duke Energy Florida LLC [100.0%]	Duke Energy Corp [100.0%]	30.3764	-83.1806	exact	Live Oak	Suwannee		Florida	https://www.gem.wiki/Suwannee_River_power_station	L100000401872	G100000402750	US26441C2044	1	197.9	197.9	44	2020	2060	2100	66	66	66	66	66	66	66	66	66	66	66	66
oil/gas	United States	Americas	Northern America	Tiger Bay power station	G200			278	operating	1997		CC	NG					Duke Energy Florida LLC [100.0%]	Duke Energy Corp [100.0%]	27.7464	-81.8495	exact	Ft. Meade	Polk		Florida	https://www.gem.wiki/Tiger_Bay_power_station	L100000401873	G100000402164	US26441C2044	1	278	278	27	2037	2077	2117	278	278	278	278	278	278	278	278	278	278	278	278
oil/gas	United States	Americas	Northern America	University of Florida power station	P1			54	operating	1994		GT	NG					Duke Energy Florida LLC [100.0%]	Duke Energy Corp [100.0%]	29.6403	-82.3486	exact	Gainesville	Alachua		Florida	https://www.gem.wiki/University_of_Florida_power_station	L100000401874	G100000402751	US26441C2044	1	54	54	30	2034	2074	2114	54	54	54	54	54	54	54	54	54	54	54	54
oil/gas	United States	Americas	Northern America	Vermillion energy facility	CT1			87	operating	2000		GT	NG					Duke Energy Indiana LLC [62.5%]; Wabash Valley Power Association Inc [37.5%]	Duke Energy Corp [62.5%]	39.9223	-87.4464	exact	Cayuga	Vermillion		Indiana	https://www.gem.wiki/Vermillion_energy_facility	L100000401550	G100000402247	US26441C2044	0.625	696		24	2040	2080	2120	54.375	54.375	54.375	54.375	54.375	54.375	54.375	54.375	54.375	54.375	54.375	54.375
oil/gas	United States	Americas	Northern America	Vermillion energy facility	CT2			87	operating	2000		GT	NG					Duke Energy Indiana LLC [62.5%]; Wabash Valley Power Association Inc [37.5%]	Duke Energy Corp [62.5%]	39.9223	-87.4464	exact	Cayuga	Vermillion		Indiana	https://www.gem.wiki/Vermillion_energy_facility	L100000401550	G100000402248	US26441C2044	0.625	696		24	2040	2080	2120	54.375	54.375	54.375	54.375	54.375	54.375	54.375	54.375	54.375	54.375	54.375	54.375
oil/gas	United States	Americas	Northern America	Vermillion energy facility	CT3			87	operating	2000		GT	NG					Duke Energy Indiana LLC [62.5%]; Wabash Valley Power Association Inc [37.5%]	Duke Energy Corp [62.5%]	39.9223	-87.4464	exact	Cayuga	Vermillion		Indiana	https://www.gem.wiki/Vermillion_energy_facility	L100000401550	G100000402249	US26441C2044	0.625	696		24	2040	2080	2120	54.375	54.375	54.375	54.375	54.375	54.375	54.375	54.375	54.375	54.375	54.375	54.375
oil/gas	United States	Americas	Northern America	Vermillion energy facility	CT4			87	operating	2000		GT	NG					Duke Energy Indiana LLC [62.5%]; Wabash Valley Power Association Inc [37.5%]	Duke Energy Corp [62.5%]	39.9223	-87.4464	exact	Cayuga	Vermillion		Indiana	https://www.gem.wiki/Vermillion_energy_facility	L100000401550	G100000402250	US26441C2044	0.625	696		24	2040	2080	2120	54.375	54.375	54.375	54.375	54.375	54.375	54.375	54.375	54.375	54.375	54.375	54.375
oil/gas	United States	Americas	Northern America	Vermillion energy facility	CT5			87	operating	2000		GT	NG					Duke Energy Indiana LLC [62.5%]; Wabash Valley Power Association Inc [37.5%]	Duke Energy Corp [62.5%]	39.9223	-87.4464	exact	Cayuga	Vermillion		Indiana	https://www.gem.wiki/Vermillion_energy_facility	L100000401550	G100000402251	US26441C2044	0.625	696		24	2040	2080	2120	54.375	54.375	54.375	54.375	54.375	54.375	54.375	54.375	54.375	54.375	54.375	54.375
oil/gas	United States	Americas	Northern America	Vermillion energy facility	CT6			87	operating	2000		GT	NG					Duke Energy Indiana LLC [62.5%]; Wabash Valley Power Association Inc [37.5%]	Duke Energy Corp [62.5%]	39.9223	-87.4464	exact	Cayuga	Vermillion		Indiana	https://www.gem.wiki/Vermillion_energy_facility	L100000401550	G100000402252	US26441C2044	0.625	696		24	2040	2080	2120	54.375	54.375	54.375	54.375	54.375	54.375	54.375	54.375	54.375	54.375	54.375	54.375
oil/gas	United States	Americas	Northern America	Vermillion energy facility	CT7			87	operating	2000		GT	NG					Duke Energy Indiana LLC [62.5%]; Wabash Valley Power Association Inc [37.5%]	Duke Energy Corp [62.5%]	39.9223	-87.4464	exact	Cayuga	Vermillion		Indiana	https://www.gem.wiki/Vermillion_energy_facility	L100000401550	G100000402253	US26441C2044	0.625	696		24	2040	2080	2120	54.375	54.375	54.375	54.375	54.375	54.375	54.375	54.375	54.375	54.375	54.375	54.375
oil/gas	United States	Americas	Northern America	Vermillion energy facility	CT8			87	operating	2000		GT	NG					Duke Energy Indiana LLC [62.5%]; Wabash Valley Power Association Inc [37.5%]	Duke Energy Corp [62.5%]	39.9223	-87.4464	exact	Cayuga	Vermillion		Indiana	https://www.gem.wiki/Vermillion_energy_facility	L100000401550	G100000402254	US26441C2044	0.625	696	696	24	2040	2080	2120	54.375	54.375	54.375	54.375	54.375	54.375	54.375	54.375	54.375	54.375	54.375	54.375
oil/gas	United States	Americas	Northern America	W.S. Lee Steam Station	3			163	retired	1958	2022	ST	NG					Duke Energy Carolinas LLC [100.0%]	Duke Energy Corp [100.0%]	34.6022	-82.435	exact	Williamston	Anderson		South Carolina	https://www.gem.wiki/W.S._Lee_Steam_Station	L100000104179	G100000402732	US26441C2044	1	1118		66	1998	2038	2078	163	163	0	0	0	0	0	0	0	0	0	0
oil/gas	United States	Americas	Northern America	W.S. Lee Steam Station	7			54	operating	2007		GT	NG/FO					Duke Energy Carolinas LLC [100.0%]	Duke Energy Corp [100.0%]	34.6022	-82.435	exact	Williamston	Anderson		South Carolina	https://www.gem.wiki/W.S._Lee_Steam_Station	L100000104179	G100000402733	US26441C2044	1	1118		17	2047	2087	2127	54	54	54	54	54	54	54	54	54	54	54	54
oil/gas	United States	Americas	Northern America	W.S. Lee Steam Station	8			54	operating	2007		GT	NG/FO					Duke Energy Carolinas LLC [100.0%]	Duke Energy Corp [100.0%]	34.6022	-82.435	exact	Williamston	Anderson		South Carolina	https://www.gem.wiki/W.S._Lee_Steam_Station	L100000104179	G100000402734	US26441C2044	1	1118		17	2047	2087	2127	54	54	54	54	54	54	54	54	54	54	54	54
oil/gas	United States	Americas	Northern America	W.S. Lee Steam Station	CC1			847	operating	2018		CC	NG					Duke Energy Carolinas LLC [100.0%]	Duke Energy Corp [100.0%]	34.6022	-82.435	exact	Williamston	Anderson		South Carolina	https://www.gem.wiki/W.S._Lee_Steam_Station	L100000104179	G100000401663	US26441C2044	1	1118	1118	6	2058	2098	2138	847	847	847	847	847	847	847	847	847	847	847	847
oil/gas	United States	Americas	Northern America	Wayne County power station	1			195	operating	2000		GT	NG/FO					Duke Energy Progress LLC [100.0%]	Duke Energy Corp [100.0%]	35.3758	-78.0981	exact	Goldsboro	Wayne		North Carolina	https://www.gem.wiki/Wayne_County_power_station	L100000401886	G100000402788	US26441C2044	1	979		24	2040	2080	2120	195	195	195	195	195	195	195	195	195	195	195	195
oil/gas	United States	Americas	Northern America	Wayne County power station	2			195	operating	2000		GT	NG/FO					Duke Energy Progress LLC [100.0%]	Duke Energy Corp [100.0%]	35.3758	-78.0981	exact	Goldsboro	Wayne		North Carolina	https://www.gem.wiki/Wayne_County_power_station	L100000401886	G100000402789	US26441C2044	1	979		24	2040	2080	2120	195	195	195	195	195	195	195	195	195	195	195	195
oil/gas	United States	Americas	Northern America	Wayne County power station	3			195	operating	2000		GT	NG/FO					Duke Energy Progress LLC [100.0%]	Duke Energy Corp [100.0%]	35.3758	-78.0981	exact	Goldsboro	Wayne		North Carolina	https://www.gem.wiki/Wayne_County_power_station	L100000401886	G100000402790	US26441C2044	1	979		24	2040	2080	2120	195	195	195	195	195	195	195	195	195	195	195	195
oil/gas	United States	Americas	Northern America	Wayne County power station	4			195	operating	2000		GT	NG/FO					Duke Energy Progress LLC [100.0%]	Duke Energy Corp [100.0%]	35.3758	-78.0981	exact	Goldsboro	Wayne		North Carolina	https://www.gem.wiki/Wayne_County_power_station	L100000401886	G100000402791	US26441C2044	1	979		24	2040	2080	2120	195	195	195	195	195	195	195	195	195	195	195	195
oil/gas	United States	Americas	Northern America	Wayne County power station	5			199	operating	2009		GT	NG/FO					Duke Energy Progress LLC [100.0%]	Duke Energy Corp [100.0%]	35.3758	-78.0981	exact	Goldsboro	Wayne		North Carolina	https://www.gem.wiki/Wayne_County_power_station	L100000401886	G100000402792	US26441C2044	1	979	979	15	2049	2089	2129	199	199	199	199	199	199	199	199	199	199	199	199
oil/gas	United States	Americas	Northern America	Wheatland generating facility	CTG1			125	operating	2000		GT	NG					Duke Energy Indiana LLC [100.0%]	Duke Energy Corp [100.0%]	38.6716	-87.2931	exact	Wheatland	Knox		Indiana	https://www.gem.wiki/Wheatland_generating_facility	L100000401879	G100000402764	US26441C2044	1	500		24	2040	2080	2120	125	125	125	125	125	125	125	125	125	125	125	125
oil/gas	United States	Americas	Northern America	Wheatland generating facility	CTG2			125	operating	2000		GT	NG					Duke Energy Indiana LLC [100.0%]	Duke Energy Corp [100.0%]	38.6716	-87.2931	exact	Wheatland	Knox		Indiana	https://www.gem.wiki/Wheatland_generating_facility	L100000401879	G100000402765	US26441C2044	1	500		24	2040	2080	2120	125	125	125	125	125	125	125	125	125	125	125	125
oil/gas	United States	Americas	Northern America	Wheatland generating facility	CTG3			125	operating	2000		GT	NG					Duke Energy Indiana LLC [100.0%]	Duke Energy Corp [100.0%]	38.6716	-87.2931	exact	Wheatland	Knox		Indiana	https://www.gem.wiki/Wheatland_generating_facility	L100000401879	G100000402766	US26441C2044	1	500		24	2040	2080	2120	125	125	125	125	125	125	125	125	125	125	125	125
oil/gas	United States	Americas	Northern America	Wheatland generating facility	CTG4			125	operating	2000		GT	NG					Duke Energy Indiana LLC [100.0%]	Duke Energy Corp [100.0%]	38.6716	-87.2931	exact	Wheatland	Knox		Indiana	https://www.gem.wiki/Wheatland_generating_facility	L100000401879	G100000402767	US26441C2044	1	500	500	24	2040	2080	2120	125	125	125	125	125	125	125	125	125	125	125	125
oil/gas	United States	Americas	Northern America	Woodsdale power station	GT2			95	operating	1992		GT	NG/FO					Duke Energy Kentucky Inc [100.0%]	Duke Energy Corp [100.0%]	39.4492	-84.4611	exact	Trenton	Butler		Ohio	https://www.gem.wiki/Woodsdale_power_station	L100000401880	G100000402769	US26441C2044	1	570		32	2032	2072	2112	95	95	95	95	95	95	95	95	95	95	95	95
oil/gas	United States	Americas	Northern America	Woodsdale power station	GT3			95	operating	1992		GT	NG/FO					Duke Energy Kentucky Inc [100.0%]	Duke Energy Corp [100.0%]	39.4492	-84.4611	exact	Trenton	Butler		Ohio	https://www.gem.wiki/Woodsdale_power_station	L100000401880	G100000402770	US26441C2044	1	570		32	2032	2072	2112	95	95	95	95	95	95	95	95	95	95	95	95
oil/gas	United States	Americas	Northern America	Woodsdale power station	GT4			95	operating	1992		GT	NG/FO					Duke Energy Kentucky Inc [100.0%]	Duke Energy Corp [100.0%]	39.4492	-84.4611	exact	Trenton	Butler		Ohio	https://www.gem.wiki/Woodsdale_power_station	L100000401880	G100000402771	US26441C2044	1	570		32	2032	2072	2112	95	95	95	95	95	95	95	95	95	95	95	95
oil/gas	United States	Americas	Northern America	Woodsdale power station	GT5			95	operating	1992		GT	NG/FO					Duke Energy Kentucky Inc [100.0%]	Duke Energy Corp [100.0%]	39.4492	-84.4611	exact	Trenton	Butler		Ohio	https://www.gem.wiki/Woodsdale_power_station	L100000401880	G100000402772	US26441C2044	1	570		32	2032	2072	2112	95	95	95	95	95	95	95	95	95	95	95	95
oil/gas	United States	Americas	Northern America	Woodsdale power station	GT6			95	operating	1992		GT	NG/FO					Duke Energy Kentucky Inc [100.0%]	Duke Energy Corp [100.0%]	39.4492	-84.4611	exact	Trenton	Butler		Ohio	https://www.gem.wiki/Woodsdale_power_station	L100000401880	G100000402773	US26441C2044	1	570		32	2032	2072	2112	95	95	95	95	95	95	95	95	95	95	95	95
oil/gas	United States	Americas	Northern America	Woodsdale power station	GT1			95	operating	1993		GT	NG/FO					Duke Energy Kentucky Inc [100.0%]	Duke Energy Corp [100.0%]	39.4492	-84.4611	exact	Trenton	Butler		Ohio	https://www.gem.wiki/Woodsdale_power_station	L100000401880	G100000402768	US26441C2044	1	570	570	31	2033	2073	2113	95	95	95	95	95	95	95	95	95	95	95	95
hydropower	United States	Americas	Northern America	Bad Creek hydroelectric plant				1488	operating	1991		pumped storage				TRUE	FALSE	Duke Energy Carolinas LLC		35.0075	-82.9975	exact	Salem	Oconee County		South Carolina	https://gem.wiki/Bad_Creek_hydroelectric_plant	L603716	G603754	US26441C2044	1	1488	1488	33	2031	2071	2111	1488	1488	1488	1488	1488	1488	1488	1488	1488	1488	1488	1488
hydropower	United States	Americas	Northern America	Cowans Ford hydroelectric plant				350	operating	1963		run-of-river				TRUE	FALSE	Duke Energy Carolinas LLC		35.4346	-80.9588	exact	Stanley	Lincoln County		North Carolina	https://gem.wiki/Cowans_Ford_hydroelectric_plant	L603771	G603809	US26441C2044	1	350	350	61	2003	2043	2083	350	350	350	350	350	350	350	350	350	350	350	350
hydropower	United States	Americas	Northern America	Jocassee hydroelectric plant				774	operating	1973		pumped storage				TRUE	FALSE	Duke Energy Carolinas LLC		34.9594	-82.9147	exact	Salem	Pickens County		South Carolina	https://gem.wiki/Jocassee_hydroelectric_plant	L603831	G603869	US26441C2044	1	774	774	51	2013	2053	2093	774	774	774	774	774	774	774	774	774	774	774	774
hydropower	United States	Americas	Northern America	Keowee hydroelectric plant				158	operating	1971		conventional storage				TRUE	FALSE	Duke Energy Carolinas LLC		34.7981	-82.8872	exact	Seneca	Pickens County		South Carolina	https://gem.wiki/Keowee_hydroelectric_plant	L603841	G603879	US26441C2044	1	158	158	53	2011	2051	2091	158	158	158	158	158	158	158	158	158	158	158	158
hydropower	United States	Americas	Northern America	Markland hydroelectric plant				78	operating	1967		run-of-river				TRUE	FALSE	Duke Energy Indiana LLC		38.7795	-84.964	exact	Florence	Switzerland County		Indiana	https://gem.wiki/Markland_hydroelectric_plant	L603860	G603898	US26441C2044	1	78	78	57	2007	2047	2087	78	78	78	78	78	78	78	78	78	78	78	78
hydropower	United States	Americas	Northern America	Tillery hydroelectric plant				84	operating	1928		conventional storage				TRUE	FALSE	Duke Energy Progress (NC)		35.2067	-80.0648	exact	Mount Gilead	Montgomery County		North Carolina	https://gem.wiki/Tillery_hydroelectric_plant	L603946	G603984	US26441C2044	1	84	84	96	1968	2008	2048	84	84	84	84	84	84	84	84	84	84	84	84
hydropower	United States	Americas	Northern America	Walters hydroelectric plant				108	operating	1930		conventional storage				TRUE	FALSE	Duke Energy Progress (NC)		35.6946	-83.0503	exact	Waterville	Haywood County		North Carolina	https://gem.wiki/Walters_hydroelectric_plant	L603955	G603993	US26441C2044	1	108	108	94	1970	2010	2050	108	108	108	108	108	108	108	108	108	108	108	108
hydropower	United States	Americas	Northern America	Wateree hydroelectric plant				91	operating	1919		run-of-river				TRUE	FALSE	Duke Energy Carolinas LLC		34.3355	-80.7021	exact	Ridgeway	Kershaw County		South Carolina	https://gem.wiki/Wateree_hydroelectric_plant	L603957	G603995	US26441C2044	1	91	91	105	1959	1999	2039	91	91	91	91	91	91	91	91	91	91	91	91
nuclear	United States	Americas	Northern America	McGuire nuclear power plant	1			1215	operating	1981		pressurized water reactor						Duke Energy CORP		35.4331	-80.9486	exact		Mecklenburg County		North Carolina	https://gem.wiki/McGuire_nuclear_power_plant	L500068	G500117	US26441C2044	1	2430		43	2021	2061	2101	1215	1215	1215	1215	1215	1215	1215	1215	1215	1215	1215	1215
nuclear	United States	Americas	Northern America	McGuire nuclear power plant	2			1215	operating	1984		pressurized water reactor						Duke Energy CORP		35.4331	-80.9486	exact		Mecklenburg County		North Carolina	https://gem.wiki/McGuire_nuclear_power_plant	L500068	G500118	US26441C2044	1	2430	2430	40	2024	2064	2104	1215	1215	1215	1215	1215	1215	1215	1215	1215	1215	1215	1215
nuclear	United States	Americas	Northern America	Oconee nuclear power plant	1			891	operating	1973		pressurized water reactor						Duke Energy CORP		34.7939	-82.8986	exact		Oconee County		South Carolina	https://gem.wiki/Oconee_nuclear_power_plant	L500152	G500348	US26441C2044	1	2682		51	2013	2053	2093	891	891	891	891	891	891	891	891	891	891	891	891
nuclear	United States	Americas	Northern America	Oconee nuclear power plant	2			891	operating	1974		pressurized water reactor						Duke Energy CORP		34.7939	-82.8986	exact		Oconee County		South Carolina	https://gem.wiki/Oconee_nuclear_power_plant	L500152	G500349	US26441C2044	1	2682		50	2014	2054	2094	891	891	891	891	891	891	891	891	891	891	891	891
nuclear	United States	Americas	Northern America	Oconee nuclear power plant	3			900	operating	1974		pressurized water reactor						Duke Energy CORP		34.7939	-82.8986	exact		Oconee County		South Carolina	https://gem.wiki/Oconee_nuclear_power_plant	L500152	G500347	US26441C2044	1	2682	2682	50	2014	2054	2094	900	900	900	900	900	900	900	900	900	900	900	900
solar	United States	Americas	Northern America	Bay Ranch Solar Power Plant				75	operating	2023		PV						Duke Energy CORP		30.1648	-85.4918	exact		Bay County		Florida	https://gem.wiki/Bay_Ranch_Solar_Power_Plant	L808387	G810578	US26441C2044	1	75		1	2063	2103	2143	0	0	0	75	75	75	75	75	75	75	75	75
solar	United States	Americas	Northern America	Bay Trail Solar Power Plant				75	operating	2022		PV						Duke Energy CORP		28.9999	-82.6722	exact	Crystal River	Citrus County		Florida	https://gem.wiki/Bay_Trail_Solar_Power_Plant	L804382	G805035	US26441C2044	1	75	75	2	2062	2102	2142	0	0	75	75	75	75	75	75	75	75	75	75
solar	United States	Americas	Northern America	Broad River Solar				50	operating	2021		PV						Duke Energy CORP		35.188	-81.751	exact	Mooresboro	Cleveland County		North Carolina	https://gem.wiki/Broad_River_Solar	L804383	G805036	US26441C2044	1	50	50	3	2061	2101	2141	0	50	50	50	50	50	50	50	50	50	50	50
solar	United States	Americas	Northern America	Capital Partners Solar Project			Pasquotank solar farm	20	operating	2014		PV						Duke Energy CORP		36.272	-76.308	exact		Pasquotank County		North Carolina	https://gem.wiki/Capital_Partners_Solar_Project	L804384	G805037	US26441C2044	1	20	20	10	2054	2094	2134	20	20	20	20	20	20	20	20	20	20	20	20
solar	United States	Americas	Northern America	Caprock Solar	1			25	operating	2016		PV						Duke Energy CORP		34.984	-103.623	exact		Quay County		New Mexico	https://gem.wiki/Caprock_Solar	L805002	G805769	US26441C2044	1	25	25	8	2056	2096	2136	25	25	25	25	25	25	25	25	25	25	25	25
solar	United States	Americas	Northern America	Charlie Creek Solar Power Plant				75	operating	2022		PV						Duke Energy CORP		27.6398	-81.6544	exact	Wauchula	Hardee County		Florida	https://gem.wiki/Charlie_Creek_Solar_Power_Plant	L804385	G805038	US26441C2044	1	75		2	2062	2102	2142	0	0	75	75	75	75	75	75	75	75	75	75
solar	United States	Americas	Northern America	Columbia (Duke Energy) Solar Power Plant				75	operating	2020		PV						Duke Energy CORP		29.8826	-82.6962	exact		Columbia County		Florida	https://gem.wiki/Columbia_(Duke_Energy)_Solar_Power_Plant	L804386	G805039	US26441C2044	1	75	75	4	2060	2100	2140	75	75	75	75	75	75	75	75	75	75	75	75
solar	United States	Americas	Northern America	Conetoe II Solar			Conetoe solar farm	80	operating	2015		PV						Duke Energy CORP		35.822	-77.481	exact		Edgecombe County		North Carolina	https://gem.wiki/Conetoe_II_Solar	L804288	G804916	US26441C2044	1	80	80	9	2055	2095	2135	80	80	80	80	80	80	80	80	80	80	80	80
solar	United States	Americas	Northern America	Debary Solar Power Plant				74	operating	2020		PV						Duke Energy CORP		28.8995	-81.3309	exact		Volusia County		Florida	https://gem.wiki/Debary_Solar_Power_Plant	L804387	G805040	US26441C2044	1	74	74	4	2060	2100	2140	74	74	74	74	74	74	74	74	74	74	74	74
solar	United States	Americas	Northern America	Dogwood Solar				20	operating	2014		PV						Duke Energy CORP		36.121	-77.404	exact		Halifax County		North Carolina	https://gem.wiki/Dogwood_Solar	L805003	G805770	US26441C2044	1	20	20	10	2054	2094	2134	20	20	20	20	20	20	20	20	20	20	20	20
solar	United States	Americas	Northern America	Duette Solar Power Plant				74	operating	2021		PV						Duke Energy CORP		27.5858	-82.062	exact	Parrish	Manatee County		Florida	https://gem.wiki/Duette_Solar_Power_Plant	L804388	G805041	US26441C2044	1	74	74	3	2061	2101	2141	0	74	74	74	74	74	74	74	74	74	74	74
solar	United States	Americas	Northern America	East Blackland Solar Project 1			Pflugerville solar park	144	operating	2021		PV						Duke Energy CORP		30.4214	-97.4614	exact	Manor	Travis County		Texas	https://gem.wiki/East_Blackland_Solar_Project_1	L805004	G805771	US26441C2044	1	144	144	3	2061	2101	2141	0	144	144	144	144	144	144	144	144	144	144	144
solar	United States	Americas	Northern America	Elm City Solar Facility				40	operating	2016		PV						Duke Energy CORP		35.7811	-77.8469	exact		Wilson County		North Carolina	https://gem.wiki/Elm_City_Solar_Facility	L804389	G805042	US26441C2044	1	40	40	8	2056	2096	2136	40	40	40	40	40	40	40	40	40	40	40	40
solar	United States	Americas	Northern America	Fayetteville Solar			DD Fayetteville Solar NC	23	operating	2015		PV						Duke Energy CORP		34.8344	-78.8436	exact		Bladen County		North Carolina	https://gem.wiki/Fayetteville_Solar	L804390	G805043	US26441C2044	1	23	23	9	2055	2095	2135	23	23	23	23	23	23	23	23	23	23	23	23
solar	United States	Americas	Northern America	Fort Green Solar Power Plant				75	operating	2022		PV						Duke Energy CORP		27.6411	-81.9416	exact	Bowling Green	Hardee County		Florida	https://gem.wiki/Fort_Green_Solar_Power_Plant	L804391	G805044	US26441C2044	1	75	75	2	2062	2102	2142	0	0	75	75	75	75	75	75	75	75	75	75
solar	United States	Americas	Northern America	Gaston Solar Power Plant				25	operating	2020		PV						Duke Energy CORP		35.322	-81.342	approximate		Gaston County		North Carolina	https://gem.wiki/Gaston_Solar_Power_Plant	L804392	G805045	US26441C2044	1	25	25	4	2060	2100	2140	25	25	25	25	25	25	25	25	25	25	25	25
solar	United States	Americas	Northern America	Halifax solar farm				20	operating	2014		PV						Duke Energy CORP		36.4419	-77.7114	exact		Halifax County		North Carolina	https://gem.wiki/Halifax_solar_farm	L804393	G805046	US26441C2044	1	20	20	10	2054	2094	2134	20	20	20	20	20	20	20	20	20	20	20	20
solar	United States	Americas	Northern America	Hamilton Solar Power Plant				75	operating	2018		PV						Duke Energy CORP		30.4443	-83.1869	exact		Hamilton County		Florida	https://gem.wiki/Hamilton_Solar_Power_Plant	L804394	G805047	US26441C2044	1	75		6	2058	2098	2138	75	75	75	75	75	75	75	75	75	75	75	75
solar	United States	Americas	Northern America	Hardeetown Solar Power Plant				75	operating	2023		PV						Duke Energy CORP		29.4856	-82.8435	approximate		Levy County		Florida	https://gem.wiki/Hardeetown_Solar_Power_Plant	L808442	G810664	US26441C2044	1	75		1	2063	2103	2143	0	0	0	75	75	75	75	75	75	75	75	75
solar	United States	Americas	Northern America	High Springs Solar Power Plant				75	operating	2023		PV						Duke Energy CORP		29.8101	-82.6398	approximate		Alachua County		Florida	https://gem.wiki/High_Springs_Solar_Power_Plant	L808448	G810671	US26441C2044	1	75		1	2063	2103	2143	0	0	0	75	75	75	75	75	75	75	75	75
solar	United States	Americas	Northern America	Hildreth Solar Power Plant				75	operating	2023		PV						Duke Energy CORP		29.9648	-82.8232	approximate		Suwannee County		Florida	https://gem.wiki/Hildreth_Solar_Power_Plant	L808450	G810673	US26441C2044	1	75	75	1	2063	2103	2143	0	0	0	75	75	75	75	75	75	75	75	75
solar	United States	Americas	Northern America	Holstein 1 (Duke) solar farm				200	operating	2020		PV						Duke Energy CORP		32.1041	-100.162	exact		Nolan County		Texas	https://gem.wiki/Holstein_1_(Duke)_solar_farm	L804173	G804775	US26441C2044	1	200	200	4	2060	2100	2140	200	200	200	200	200	200	200	200	200	200	200	200
solar	United States	Americas	Northern America	Hoosier Jack Solar				175	announced	2024		PV						Duke Energy CORP		39.2681	-87.3244	approximate		Vigo County		Indiana	https://gem.wiki/Hoosier_Jack_Solar	L808453	G810677	US26441C2044	1	175	175	0	2064	2104	2144	0	0	0	0	0	0	0	0	0	0	0	0
solar	United States	Americas	Northern America	Jackpot Solar			Twin Falls South	120	operating	2022		PV						Duke Energy CORP		42.2042	-114.61	exact	Twin Falls			Idaho	https://gem.wiki/Jackpot_Solar	L805130	G805909	US26441C2044	1	120	120	2	2062	2102	2142	0	0	120	120	120	120	120	120	120	120	120	120
solar	United States	Americas	Northern America	Kelford solar farm			Capital Partners Solar Project 2	20	operating	2015		PV						Duke Energy CORP		36.155	-77.208	exact		Bertie County		North Carolina	https://gem.wiki/Kelford_solar_farm	L804395	G805048	US26441C2044	1	20	20	9	2055	2095	2135	20	20	20	20	20	20	20	20	20	20	20	20
solar	United States	Americas	Northern America	Lake Placid Solar Power Plant				45	operating	2019		PV						Duke Energy CORP		27.3311	-81.364	exact		Highlands County		Florida	https://gem.wiki/Lake_Placid_Solar_Power_Plant	L804396	G805049	US26441C2044	1	45	45	5	2059	2099	2139	45	45	45	45	45	45	45	45	45	45	45	45
solar	United States	Americas	Northern America	Lapetus solar farm				100	operating	2019		PV						Duke Energy CORP		32.4601	-102.673	exact		Andrews County		Texas	https://gem.wiki/Lapetus_solar_farm	L804397	G805050	US26441C2044	1	100	100	5	2059	2099	2139	100	100	100	100	100	100	100	100	100	100	100	100
solar	United States	Americas	Northern America	Longboat Solar				20	operating	2016		PV						Duke Energy CORP		34.905	-117.104	exact		San Bernardino County		California	https://gem.wiki/Longboat_Solar	L805008	G805775	US26441C2044	1	20	20	8	2056	2096	2136	20	20	20	20	20	20	20	20	20	20	20	20
solar	United States	Americas	Northern America	Maiden Creek Solar Power Plant				69	operating	2021		PV						Duke Energy CORP		35.593	-81.167	exact	Maiden	Catawba County		North Carolina	https://gem.wiki/Maiden_Creek_Solar_Power_Plant	L804398	G805051	US26441C2044	1	69	69	3	2061	2101	2141	0	69	69	69	69	69	69	69	69	69	69	69
solar	United States	Americas	Northern America	Monroe Solar Facility				55	operating	2017		PV						Duke Energy CORP		34.9299	-80.6256	exact	Monroe	Union County		North Carolina	https://gem.wiki/Monroe_Solar_Facility	L804399	G805052	US26441C2044	1	55	55	7	2057	2097	2137	55	55	55	55	55	55	55	55	55	55	55	55
solar	United States	Americas	Northern America	Mule Creek solar farm			Mule Creek Renewable Energy Center	75	pre-construction	2024		PV						Duke Energy CORP		30.1105	-85.3976	approximate		Bay County		Florida	https://gem.wiki/Mule_Creek_solar_farm	L808479	G810707	US26441C2044	1	75	75	0	2064	2104	2144	0	0	0	0	0	0	0	0	0	0	0	0
solar	United States	Americas	Northern America	North Rosamond Solar				151	operating	2019		PV						Duke Energy CORP		34.862	-118.38	exact		Kern County		California	https://gem.wiki/North_Rosamond_Solar	L804400	G805053	US26441C2044	1	151	151	5	2059	2099	2139	151	151	151	151	151	151	151	151	151	151	151	151
solar	United States	Americas	Northern America	Palmer Solar				60	operating	2020		PV						Duke Energy CORP		38.6299	-104.653	exact		El Paso County		Colorado	https://gem.wiki/Palmer_Solar	L805009	G805776	US26441C2044	1	60	60	4	2060	2100	2140	60	60	60	60	60	60	60	60	60	60	60	60
solar	United States	Americas	Northern America	Pike Solar Project				175	pre-construction	2023		PV						Duke Energy CORP		38.6217	-104.581	approximate	Fountain	El Paso County		Colorado	https://gem.wiki/Pike_Solar_Project	L805132	G805911	US26441C2044	1	175	175	1	2063	2103	2143	0	0	0	0	0	0	0	0	0	0	0	0
solar	United States	Americas	Northern America	Pinson solar farm				20	operating	2022		PV						Duke Energy CORP		34.7201	-82.06	exact	Woodruff	Spartanburg County		South Carolina	https://gem.wiki/Pinson_solar_farm	L805408	G806239	US26441C2044	1	20	20	2	2062	2102	2142	0	0	20	20	20	20	20	20	20	20	20	20
solar	United States	Americas	Northern America	Pisgah Ridge Solar				250	operating	2022		PV						Duke Energy CORP		31.8965	-96.4671	exact		Navarro County		Texas	https://gem.wiki/Pisgah_Ridge_Solar	L808498	G810726	US26441C2044	1	250	250	2	2062	2102	2142	0	0	250	250	250	250	250	250	250	250	250	250
solar	United States	Americas	Northern America	Pumpjack Solar I				20	operating	2015		PV						Duke Energy CORP		35.3056	-119.623	exact		Kern County		California	https://gem.wiki/Pumpjack_Solar_I	L804401	G805054	US26441C2044	1	20	20	9	2055	2095	2135	20	20	20	20	20	20	20	20	20	20	20	20
solar	United States	Americas	Northern America	Rambler solar farm				200	operating	2020		PV						Duke Energy CORP		31.517	-100.6	exact		Tom Green County		Texas	https://gem.wiki/Rambler_solar_farm	L804402	G805055	US26441C2044	1	200	200	4	2060	2100	2140	200	200	200	200	200	200	200	200	200	200	200	200
solar	United States	Americas	Northern America	Rattler Solar Power Plant				75	shelved			PV						Duke Energy CORP		28.5553	-82.3879	approximate		Brooksville County		Florida	https://gem.wiki/Rattler_Solar_Power_Plant	L805010	G805777	US26441C2044	1	75	75	-99	40	80	120	0	0	0	0	0	0	0	0	0	0	0	0
solar	United States	Americas	Northern America	Rio Bravo Solar	1			20	operating	2016		PV						Duke Energy CORP		35.416	-119.63	exact		Kern County		California	https://gem.wiki/Rio_Bravo_Solar	L805011	G805778	US26441C2044	1	40		8	2056	2096	2136	20	20	20	20	20	20	20	20	20	20	20	20
solar	United States	Americas	Northern America	Rio Bravo Solar	2			20	operating	2016		PV						Duke Energy CORP		35.4225	-119.629	exact		Kern County		California	https://gem.wiki/Rio_Bravo_Solar	L805011	G805779	US26441C2044	1	40	40	8	2056	2096	2136	20	20	20	20	20	20	20	20	20	20	20	20
solar	United States	Americas	Northern America	Sandy Creek Solar Power Plant				75	operating	2022		PV						Duke Energy CORP		30.1031	-85.4104	exact	Panama City	Bay County		Florida	https://gem.wiki/Sandy_Creek_Solar_Power_Plant	L804403	G805056	US26441C2044	1	75		2	2062	2102	2142	0	0	75	75	75	75	75	75	75	75	75	75
solar	United States	Americas	Northern America	Santa Fe Solar Power Plant				75	operating	2021		PV						Duke Energy CORP		29.871	-82.723	exact	Archer	Alachua County		Florida	https://gem.wiki/Santa_Fe_Solar_Power_Plant	L804404	G805057	US26441C2044	1	75	75	3	2061	2101	2141	0	75	75	75	75	75	75	75	75	75	75	75
solar	United States	Americas	Northern America	Seville solar farm	1			20	operating	2015		PV						Duke Energy CORP		33.1125	-116.014	exact		Imperial County		California	https://gem.wiki/Seville_solar_farm	L805012	G805780	US26441C2044	1	50		9	2055	2095	2135	20	20	20	20	20	20	20	20	20	20	20	20
solar	United States	Americas	Northern America	Seville solar farm	2			30	operating	2015		PV						Duke Energy CORP		33.1101	-116.006	exact		Imperial County		California	https://gem.wiki/Seville_solar_farm	L805012	G805781	US26441C2044	1	50	50	9	2055	2095	2135	30	30	30	30	30	30	30	30	30	30	30	30
solar	United States	Americas	Northern America	Shawboro solar farm				20	operating	2015		PV						Duke Energy CORP		36.4333	-76.0872	exact		Camden County		North Carolina	https://gem.wiki/Shawboro_solar_farm	L805013	G805782	US26441C2044	1	20	20	9	2055	2095	2135	20	20	20	20	20	20	20	20	20	20	20	20
solar	United States	Americas	Northern America	Shoreham Solar Commons				25	operating	2018		PV						Duke Energy CORP		40.9344	-72.8885	exact		Suffolk County		New York	https://gem.wiki/Shoreham_Solar_Commons	L804405	G805058	US26441C2044	1	25	25	6	2058	2098	2138	25	25	25	25	25	25	25	25	25	25	25	25
solar	United States	Americas	Northern America	South Dixon Solar				500	shelved			PV						Duke Energy CORP		41.7817	-89.5012	exact		Lee County		Illinois	https://gem.wiki/South_Dixon_Solar	L804406	G805059	US26441C2044	1	500	500	-99	40	80	120	0	0	0	0	0	0	0	0	0	0	0	0
solar	United States	Americas	Northern America	Speedway (North Carolina) Solar				23	operating	2021		PV						Duke Energy CORP		35.218	-80.536	exact	Midland	Cabarrus County		North Carolina	https://gem.wiki/Speedway_(North_Carolina)_Solar	L804407	G805060	US26441C2044	1	23		3	2061	2101	2141	0	23	23	23	23	23	23	23	23	23	23	23
solar	United States	Americas	Northern America	Stony Knoll Solar				23	operating	2022		PV						Duke Energy CORP		36.288	-80.656	exact	Rockford	Surry County		North Carolina	https://gem.wiki/Stony_Knoll_Solar	L804408	G805061	US26441C2044	1	23	23	2	2062	2102	2142	0	0	23	23	23	23	23	23	23	23	23	23
solar	United States	Americas	Northern America	Tomlin Mill Road solar farm				35	shelved			PV						Duke Energy CORP		35.9569	-80.7714	approximate	Chalotte	Iredell County		North Carolina	https://gem.wiki/Tomlin_Mill_Road_solar_farm	L805014	G805783	US26441C2044	1	35	35	-99	40	80	120	0	0	0	0	0	0	0	0	0	0	0	0
solar	United States	Americas	Northern America	Trenton Solar Power Plant				75	operating	2019		PV						Duke Energy CORP		29.6351	-82.8431	exact		Gilchrist County		Florida	https://gem.wiki/Trenton_Solar_Power_Plant	L804409	G805062	US26441C2044	1	75		5	2059	2099	2139	75	75	75	75	75	75	75	75	75	75	75	75
solar	United States	Americas	Northern America	Twin Rivers Solar Power Plant				75	operating	2021		PV						Duke Energy CORP		30.4664	-82.9687	exact	Jasper	Hamilton County		Florida	https://gem.wiki/Twin_Rivers_Solar_Power_Plant	L804410	G805063	US26441C2044	1	75	75	3	2061	2101	2141	0	75	75	75	75	75	75	75	75	75	75	75
solar	United States	Americas	Northern America	Warsaw Farm solar farm				65	operating	2015		PV						Duke Energy CORP		35.0056	-78.1258	exact		Duplin County		North Carolina	https://gem.wiki/Warsaw_Farm_solar_farm	L804411	G805064	US26441C2044	1	65	65	9	2055	2095	2135	65	65	65	65	65	65	65	65	65	65	65	65
solar	United States	Americas	Northern America	Wewahitchka solar farm				75	shelved			PV						Duke Energy CORP		29.9983	-85.3688	approximate		Overstreet County		Florida	https://gem.wiki/Wewahitchka_solar_farm	L805005	G805772	US26441C2044	1	75	75	-99	40	80	120	0	0	0	0	0	0	0	0	0	0	0	0
solar	United States	Americas	Northern America	Wildflower (Mississippi) Solar				100	construction	2023		PV						Duke Energy CORP		34.962	-90.184	exact		DeSoto County		Mississippi	https://gem.wiki/Wildflower_(Mississippi)_Solar	L833398	G839127	US26441C2044	1	100	100	1	2063	2103	2143	0	0	0	100	100	100	100	100	100	100	100	100
solar	United States	Americas	Northern America	Winquepin solar farm			Winquepin Renewable Energy Center	75	pre-construction	2024		PV						Duke Energy CORP		30.2825	-83.2982	approximate		Madison County		Florida	https://gem.wiki/Winquepin_solar_farm	L833405	G839135	US26441C2044	1	75	75	0	2064	2104	2144	0	0	0	0	0	0	0	0	0	0	0	0
solar	United States	Americas	Northern America	Wolf Pit Branch Solar				62	construction	2023		PV						Duke Energy CORP		33.741	-81.4	exact		Lexington County		South Carolina	https://gem.wiki/Wolf_Pit_Branch_Solar	L808557	G810802	US26441C2044	1	62	62	1	2063	2103	2143	0	0	0	62	62	62	62	62	62	62	62	62
wind	United States	Americas	Northern America	Campbell Hill wind farm	1			99	operating	2009		onshore						Duke Energy CORP		42.9993	-106.021	exact		Converse County		Wyoming	https://gem.wiki/Campbell_Hill_wind_farm	L906947	G909351	US26441C2044	1	99	99	15	2049	2089	2129	99	99	99	99	99	99	99	99	99	99	99	99
wind	United States	Americas	Northern America	Cimarron II wind farm	1			131	operating	2012		onshore						Duke Energy CORP [50%]; Sumitomo Corporation of Americas [50%]		37.8727	-100.403	exact		Gray County		Kansas	https://gem.wiki/Cimarron_II_wind_farm	L907136	G909610	US26441C2044	0.5	131	131	12	2052	2092	2132	65.5	65.5	65.5	65.5	65.5	65.5	65.5	65.5	65.5	65.5	65.5	65.5
wind	United States	Americas	Northern America	Frontier wind farm	1			200	operating	2016		onshore						Duke Energy CORP		36.8357	-97.2494	exact		Kay County		Oklahoma	https://gem.wiki/Frontier_wind_farm	L907349	G909901	US26441C2044	1	552		8	2056	2096	2136	200	200	200	200	200	200	200	200	200	200	200	200
wind	United States	Americas	Northern America	Frontier wind farm	2			352	operating	2021		onshore						Duke Energy CORP		36.8271	-97.0289	exact		Kay County		Oklahoma	https://gem.wiki/Frontier_wind_farm	L907349	G910269	US26441C2044	1	552	552	3	2061	2101	2141	0	352	352	352	352	352	352	352	352	352	352	352
wind	United States	Americas	Northern America	Happy Jack Windpower Project	1			29	operating	2008		onshore						Duke Energy CORP		41.1413	-105.009	exact		Laramie County		Wyoming	https://gem.wiki/Happy_Jack_Windpower_Project	L906536	G908825	US26441C2044	1	29	29	16	2048	2088	2128	29	29	29	29	29	29	29	29	29	29	29	29
wind	United States	Americas	Northern America	Ironwood wind farm	1			168	operating	2012		onshore						Duke Energy CORP [50%]; Sumitomo Corporation of Americas [50%]		37.8386	-99.774	exact		Ford County		Kansas	https://gem.wiki/Ironwood_wind_farm	L907281	G909808	US26441C2044	0.5	168	168	12	2052	2092	2132	84	84	84	84	84	84	84	84	84	84	84	84
wind	United States	Americas	Northern America	Kit Carson Project wind farm	1			51	operating	2010		onshore						Duke Energy CORP		39.354	-102.305	exact		Kit Carson County		Colorado	https://gem.wiki/Kit_Carson_Project_wind_farm	L906705	G909029	US26441C2044	1	51	51	14	2050	2090	2130	51	51	51	51	51	51	51	51	51	51	51	51
wind	United States	Americas	Northern America	Laurel Hill wind farm	1			69	operating	2012		onshore						Duke Energy CORP		41.5269	-77.0462	exact		Lycoming County		Pennsylvania	https://gem.wiki/Laurel_Hill_wind_farm	L906791	G909144	US26441C2044	1	69	69	12	2052	2092	2132	69	69	69	69	69	69	69	69	69	69	69	69
wind	United States	Americas	Northern America	Ledyard wind farm	1		Ledyard Windpower	207	operating	2022		onshore						Duke Energy CORP		43.4392	-94.1589	exact		Kossuth County		Iowa	https://gem.wiki/Ledyard_wind_farm	L917224	G921370	US26441C2044	1	207	207	2	2062	2102	2142	0	0	207	207	207	207	207	207	207	207	207	207
wind	United States	Americas	Northern America	Los Vientos wind farm	1			200	operating	2012		onshore						Duke Energy CORP		26.3082	-97.582	exact		Cameron County		Texas	https://gem.wiki/Los_Vientos_wind_farm	L907073	G927309	US26441C2044	1	912		12	2052	2092	2132	200	200	200	200	200	200	200	200	200	200	200	200
wind	United States	Americas	Northern America	Los Vientos wind farm	2			202	operating	2012		onshore						Duke Energy CORP		26.3488	-97.6901	exact		Willacy County		Texas	https://gem.wiki/Los_Vientos_wind_farm	L907073	G927310	US26441C2044	1	912		12	2052	2092	2132	202	202	202	202	202	202	202	202	202	202	202	202
wind	United States	Americas	Northern America	Los Vientos wind farm	3			200	operating	2015		onshore						Duke Energy CORP		26.4281	-98.6032	exact		Starr County		Texas	https://gem.wiki/Los_Vientos_wind_farm	L907073	G909942	US26441C2044	1	912		9	2055	2095	2135	200	200	200	200	200	200	200	200	200	200	200	200
wind	United States	Americas	Northern America	Los Vientos wind farm	5			110	operating	2015		onshore						Duke Energy CORP		26.4056	-98.5784	exact		Starr County		Texas	https://gem.wiki/Los_Vientos_wind_farm	L907073	G909522	US26441C2044	1	912		9	2055	2095	2135	110	110	110	110	110	110	110	110	110	110	110	110
wind	United States	Americas	Northern America	Los Vientos wind farm	4			200	operating	2016		onshore						Duke Energy CORP		26.5482	-98.7101	exact		Starr County		Texas	https://gem.wiki/Los_Vientos_wind_farm	L907073	G909943	US26441C2044	1	912	912	8	2056	2096	2136	200	200	200	200	200	200	200	200	200	200	200	200
wind	United States	Americas	Northern America	Maryneal Windpower Farm	1			182	operating	2021		onshore						Duke Energy CORP		32.1918	-100.503	exact	Maryneal	Nolan County		Texas	https://gem.wiki/Maryneal_Windpower_Farm	L907311	G909847	US26441C2044	1	182	182	3	2061	2101	2141	0	182	182	182	182	182	182	182	182	182	182	182
wind	United States	Americas	Northern America	Mesquite Creek wind farm	1			211	operating	2015		onshore						Duke Energy CORP		32.6928	-101.696	exact		Dawson County		Texas	https://gem.wiki/Mesquite_Creek_wind_farm	L907449	G910045	US26441C2044	1	211	211	9	2055	2095	2135	211	211	211	211	211	211	211	211	211	211	211	211
wind	United States	Americas	Northern America	Mesteño wind farm	1			202	operating	2019		onshore						Duke Energy CORP		26.4905	-98.7305	exact		Starr County		Texas	https://gem.wiki/Mesteño_wind_farm	L907419	G910001	US26441C2044	1	202	202	5	2059	2099	2139	202	202	202	202	202	202	202	202	202	202	202	202
wind	United States	Americas	Northern America	North Allegheny Windpower Project	1			70	operating	2009		onshore						Duke Energy CORP		40.3765	-78.6286	exact	Portage Township	Cambria County		Pennsylvania	https://gem.wiki/North_Allegheny_Windpower_Project	L906796	G909150	US26441C2044	1	70	70	15	2049	2089	2129	70	70	70	70	70	70	70	70	70	70	70	70
wind	United States	Americas	Northern America	Notrees Windpower Hybrid	1			92	operating	2009		onshore						Duke Energy CORP		31.9667	-102.809	exact		Winkler County		Texas	https://gem.wiki/Notrees_Windpower_Hybrid	L906746	G909315	US26441C2044	1	152		15	2049	2089	2129	92	92	92	92	92	92	92	92	92	92	92	92
wind	United States	Americas	Northern America	Notrees Windpower Hybrid	2			60	operating	2009		onshore						Duke Energy CORP		31.9667	-102.809	exact		Winkler County		Texas	https://gem.wiki/Notrees_Windpower_Hybrid	L906746	G909085	US26441C2044	1	152	152	15	2049	2089	2129	60	60	60	60	60	60	60	60	60	60	60	60
wind	United States	Americas	Northern America	Ocotillo (Duke) Windpower	1			59	operating	2008		onshore						Duke Energy CORP		32.1576	-101.397	exact		Howard County		Texas	https://gem.wiki/Ocotillo_(Duke)_Windpower	L906727	G909061	US26441C2044	1	59	59	16	2048	2088	2128	59	59	59	59	59	59	59	59	59	59	59	59
wind	United States	Americas	Northern America	Shirley Wind Project	1			20	operating	2010		onshore						Duke Energy CORP		44.3475	-87.9197	exact		Brown County		Wisconsin	https://gem.wiki/Shirley_Wind_Project	L906427	G908703	US26441C2044	1	20	20	14	2050	2090	2130	20	20	20	20	20	20	20	20	20	20	20	20
wind	United States	Americas	Northern America	Silver Sage Windpower	1			42	operating	2009		onshore						Duke Energy CORP		41.137	-105.029	exact		Laramie County		Wyoming	https://gem.wiki/Silver_Sage_Windpower	L906629	G908938	US26441C2044	1	42	42	15	2049	2089	2129	42	42	42	42	42	42	42	42	42	42	42	42
wind	United States	Americas	Northern America	Sweetwater wind farm	5			80	operating	2007		onshore						Leeward Energy [53%]; Duke Energy CORP [47%]		32.2371	-100.491	exact		Nolan County		Texas	https://gem.wiki/Sweetwater_wind_farm	L906593	G909274	US26441C2044	0.47	321		17	2047	2087	2127	37.6	37.6	37.6	37.6	37.6	37.6	37.6	37.6	37.6	37.6	37.6	37.6
wind	United States	Americas	Northern America	Sweetwater wind farm	4A			135	operating	2007		onshore						Leeward Energy [53%]; Duke Energy CORP [47%]		32.2839	-100.533	exact		Nolan County		Texas	https://gem.wiki/Sweetwater_wind_farm	L906593	G909626	US26441C2044	0.47	321		17	2047	2087	2127	63.45	63.45	63.45	63.45	63.45	63.45	63.45	63.45	63.45	63.45	63.45	63.45
wind	United States	Americas	Northern America	Sweetwater wind farm	4B			106	operating	2007		onshore						Leeward Energy [53%]; Duke Energy CORP [47%]		32.2488	-100.496	exact		Nolan County		Texas	https://gem.wiki/Sweetwater_wind_farm	L906593	G909501	US26441C2044	0.47	321	321	17	2047	2087	2127	49.82	49.82	49.82	49.82	49.82	49.82	49.82	49.82	49.82	49.82	49.82	49.82
wind	United States	Americas	Northern America	Top Of The World Windpower Project	1			200	operating	2010		onshore						Duke Energy CORP		42.9632	-105.74	exact		Converse County		Wyoming	https://gem.wiki/Top_Of_The_World_Windpower_Project	L907409	G909979	US26441C2044	1	200	200	14	2050	2090	2130	200	200	200	200	200	200	200	200	200	200	200	200
wind	United States	Americas	Northern America	Wilmington East Wind Energy Area	1		OCS-A 0546	893	pre-construction			offshore hard mount						Duke Energy CORP		33.6767	-78.0402	approximate	Oak Island			North Carolina	https://gem.wiki/Wilmington_East_Wind_Energy_Area	L907702	G910367	US26441C2044	1	893	893	-99	40	80	120	0	0	0	0	0	0	0	0	0	0	0	0
																																		3217.45	3217.45	0	0	55499.1	55528.1	56285.1	56747.1	57283.1	57283.1	57283.1	57283.1	57283.1	57283.1	57283.1	57283.1
																																					Coal	17660	16645	16645	16645	16645	16645	16645	16645	16645	16645	16645	16645
																																					Oil&Gas	25356.7	25356.7	25193.7	25193.7	25729.7	25729.7	25729.7	25729.7	25729.7	25729.7	25729.7	25729.7
																																					Fossil fuel	43016.7	42001.7	41838.7	41838.7	42374.7	42374.7	42374.7	42374.7	42374.7	42374.7	42374.7	42374.7
																																					Renewables	7370.37	8414.37	9334.37	9796.37	9796.37	9796.37	9796.37	9796.37	9796.37	9796.37	9796.37	9796.37
																																					Oil	17696.2	17696.2	17696.2	17696.2	18232.2	18232.2	18232.2	18232.2	18232.2	18232.2	18232.2	18232.2
																																					Gas	24076.5	24076.5	23913.5	23913.5	24449.5	24449.5	24449.5	24449.5	24449.5	24449.5	24449.5	24449.5
																																					Nuclear	5112	5112	5112	5112	5112	5112	5112	5112	5112	5112	5112	5112
																																					Wind	2616.37	3150.37	3357.37	3357.37	3357.37	3357.37	3357.37	3357.37	3357.37	3357.37	3357.37	3357.37
																																					solar	1623	2133	2846	3308	3308	3308	3308	3308	3308	3308	3308	3308
																																					hydropower	3131	3131	3131	3131	3131	3131	3131	3131	3131	3131	3131	3131
																																					Total capacity without discounts	56463.1	56492.1	57249.1	57711.1
																																					Total capacity without discounts	43661.1	42646.1	42483.1	42483.1
[truncated: 19 more columns]

## Sheet: DukeEnergy_TP
Type	Country/area	Region	Subregion	Plant / Project name	Unit / Phase name	Plant / Project name (local)	Plant / Project name (other)	Capacity (MW)	Status	Start year	Retired year	Technology	Fuel	Country/area 1 (hydropower only)	Country/area 2 (hydropower only)	Country/area 1 Capacity (MW) (hydropower only)	Country/area 2 Capacity (MW) (hydropower only)	Owner	Parent	Latitude	Longitude	Location accuracy	City	Local area (taluk, county)	Major area (prefecture, district)	Subnational unit (state, province)	GEM.Wiki URL	GEM location ID	GEM unit/phase ID	CompISIN	Ownership	Plant capacity	Plant capacity	Age	Reinvestment year	Reinvestment year	Reinvestment year	2020	2021	2022	2023	2024	2025	2026	2027	2028	2029	2030	2031
coal	United States	Americas	Northern America	Belews Creek Steam Station	Unit 1			1080	operating	1974	2039	supercritical	bituminous					Duke Energy Carolinas [100%]	Duke Energy Corp [100.0%]	36.2825	-80.0585	exact	Walnut Cove	Stokes		North Carolina	https://www.gem.wiki/Belews_Creek_Steam_Station	L100000104072	G100000100736	US26441C2044	1	2160		50	2014	2054	2094	1080	1080	1080	1080	1080	1080	1080	1080	1080	1080	0	0
coal	United States	Americas	Northern America	Belews Creek Steam Station	Unit 2			1080	operating	1975	2039	supercritical	bituminous					Duke Energy Carolinas [100%]	Duke Energy Corp [100.0%]	36.2825	-80.0585	exact	Walnut Cove	Stokes		North Carolina	https://www.gem.wiki/Belews_Creek_Steam_Station	L100000104072	G100000100737	US26441C2044	1	2160	2160	49	2015	2055	2095	1080	1080	1080	1080	1080	1080	1080	1080	1080	1080	0	0
coal	United States	Americas	Northern America	Cayuga Generating Station	Unit 1			531	operating	1970	2027	subcritical	bituminous					Duke Energy Indiana [100%]	Duke Energy Corp [100.0%]	39.9233	-87.4274	exact	Cayuga	Vermillion		Indiana	https://www.gem.wiki/Cayuga_Generating_Station	L100000103880	G100000101246	US26441C2044	1	1175		54	2010	2050	2090	531	531	531	531	531	531	531	0	0	0	0	0
coal	United States	Americas	Northern America	Cayuga Generating Station	Unit 2			531	operating	1972	2027	subcritical	bituminous					Duke Energy Indiana [100%]	Duke Energy Corp [100.0%]	39.9233	-87.4274	exact	Cayuga	Vermillion		Indiana	https://www.gem.wiki/Cayuga_Generating_Station	L100000103880	G100000101247	US26441C2044	1	1175	1175	52	2012	2052	2092	531	531	531	531	531	531	531	0	0	0	0	0
coal	United States	Americas	Northern America	Crystal River Energy Complex	Unit 4			739.2	operating	1982		subcritical	bituminous					Duke Energy Florida [100%]	Duke Energy Corp [100.0%]	28.957	-82.7006	exact	Crystal River	Citrus		Florida	https://www.gem.wiki/Crystal_River_Energy_Complex	L100000103825	G100000101841	US26441C2044	1	3448.4		42	2022	2062	2102	739.2	739.2	739.2	739.2	739.2	739.2	739.2	739.2	739.2	739.2	739.2	739.2
coal	United States	Americas	Northern America	Crystal River Energy Complex	Unit 5			739.2	operating	1984		subcritical	bituminous					Duke Energy Florida [100%]	Duke Energy Corp [100.0%]	28.957	-82.7006	exact	Crystal River	Citrus		Florida	https://www.gem.wiki/Crystal_River_Energy_Complex	L100000103825	G100000101842	US26441C2044	1	3448.4	3448.4	40	2024	2064	2104	739.2	739.2	739.2	739.2	739.2	739.2	739.2	739.2	739.2	739.2	739.2	739.2
coal	United States	Americas	Northern America	East Bend Generating Station	Unit 2			669.3	operating	1981		subcritical	bituminous					Duke Energy Kentucky [100%]	Duke Energy Corp [100.0%]	38.9042	-84.8513	exact	Rabbit Hash	Boone		Kentucky	https://www.gem.wiki/East_Bend_Generating_Station	L100000103938	G100000102546	US26441C2044	1	669.3	669.3	43	2021	2061	2101	669.3	669.3	669.3	669.3	669.3	669.3	669.3	669.3	669.3	669.3	669.3	669.3
coal	United States	Americas	Northern America	Edwardsport power station	Unit 1			236.5	operating	2013		IGCC	unknown					Duke Energy Indiana [100%]	Duke Energy Corp [100.0%]	38.7975	-87.2505	exact	Edwardsport			Indiana	https://www.gem.wiki/Edwardsport_power_station	L100000103885	G100000102595	US26441C2044	1	804.5		11	2053	2093	2133	236.5	236.5	236.5	236.5	236.5	236.5	236.5	236.5	236.5	236.5	236.5	236.5
coal	United States	Americas	Northern America	Edwardsport power station	Unit 2			236.5	operating	2013		IGCC	unknown					Duke Energy Indiana [100%]	Duke Energy Corp [100.0%]	38.7975	-87.2505	exact	Edwardsport			Indiana	https://www.gem.wiki/Edwardsport_power_station	L100000103885	G100000115937	US26441C2044	1	804.5		11	2053	2093	2133	236.5	236.5	236.5	236.5	236.5	236.5	236.5	236.5	236.5	236.5	236.5	236.5
coal	United States	Americas	Northern America	Edwardsport power station	Unit 3			331.5	operating	2013		IGCC	unknown					Duke Energy Indiana [100%]	Duke Energy Corp [100.0%]	38.7975	-87.2505	exact	Edwardsport			Indiana	https://www.gem.wiki/Edwardsport_power_station	L100000103885	G100000115938	US26441C2044	1	804.5	804.5	11	2053	2093	2133	331.5	331.5	331.5	331.5	331.5	331.5	331.5	331.5	331.5	331.5	331.5	331.5
coal	United States	Americas	Northern America	G.G. Allen Steam Plant	Unit 2			165	retired	1957	2021	subcritical	bituminous					Duke Energy Carolinas [100%]	Duke Energy Corp [100.0%]	35.1903	-81.0083	exact	Belmont	Gaston		North Carolina	https://www.gem.wiki/G.G._Allen_Steam_Plant	L100000104079	G100000102876	US26441C2044	1	1155		67	1997	2037	2077	165	0	0	0	0	0	0	0	0	0	0	0
coal	United States	Americas	Northern America	G.G. Allen Steam Plant	Unit 1			165	operating	1957	2024	subcritical	bituminous					Duke Energy Carolinas [100%]	Duke Energy Corp [100.0%]	35.1903	-81.0083	exact	Belmont	Gaston		North Carolina	https://www.gem.wiki/G.G._Allen_Steam_Plant	L100000104079	G100000102875	US26441C2044	1	1155		67	1997	2037	2077	165	165	165	165	0	0	0	0	0	0	0	0
coal	United States	Americas	Northern America	G.G. Allen Steam Plant	Unit 3			275	retired	1959	2021	subcritical	bituminous					Duke Energy Carolinas [100%]	Duke Energy Corp [100.0%]	35.1903	-81.0083	exact	Belmont	Gaston		North Carolina	https://www.gem.wiki/G.G._Allen_Steam_Plant	L100000104079	G100000102877	US26441C2044	1	1155		65	1999	2039	2079	275	0	0	0	0	0	0	0	0	0	0	0
coal	United States	Americas	Northern America	G.G. Allen Steam Plant	Unit 4			275	retired	1960	2021	subcritical	bituminous					Duke Energy Carolinas [100%]	Duke Energy Corp [100.0%]	35.1903	-81.0083	exact	Belmont	Gaston		North Carolina	https://www.gem.wiki/G.G._Allen_Steam_Plant	L100000104079	G100000102878	US26441C2044	1	1155		64	2000	2040	2080	275	0	0	0	0	0	0	0	0	0	0	0
coal	United States	Americas	Northern America	G.G. Allen Steam Plant	Unit 5			275	operating	1961	2024	subcritical	bituminous					Duke Energy Carolinas [100%]	Duke Energy Corp [100.0%]	35.1903	-81.0083	exact	Belmont	Gaston		North Carolina	https://www.gem.wiki/G.G._Allen_Steam_Plant	L100000104079	G100000102879	US26441C2044	1	1155	1155	63	2001	2041	2081	275	275	275	275	0	0	0	0	0	0	0	0
coal	United States	Americas	Northern America	Gallagher Generating Station	Unit 2		R. Gallagher Generating Station	150	retired	1958	2021	subcritical	bituminous					Duke Energy Indiana [100%]	Duke Energy Corp [100.0%]	38.2637	-85.8381	exact	New Albany	Floyd		Indiana	https://www.gem.wiki/Gallagher_Generating_Station	L100000103888	G100000102909	US26441C2044	1	300		66	1998	2038	2078	150	0	0	0	0	0	0	0	0	0	0	0
coal	United States	Americas	Northern America	Gallagher Generating Station	Unit 4		R. Gallagher Generating Station	150	retired	1961	2021	subcritical	bituminous					Duke Energy Indiana [100%]	Duke Energy Corp [100.0%]	38.2637	-85.8381	exact	New Albany	Floyd		Indiana	https://www.gem.wiki/Gallagher_Generating_Station	L100000103888	G100000102911	US26441C2044	1	300	300	63	2001	2041	2081	150	0	0	0	0	0	0	0	0	0	0	0
coal	United States	Americas	Northern America	Gibson Generating Station	Unit 1			667.9	operating	1975	2035	supercritical	bituminous					Duke Energy Indiana [100%]	Duke Energy Corp [100.0%]	38.3714	-87.7682	exact	East Mount Carmel	Gibson		Indiana	https://www.gem.wiki/Gibson_Generating_Station	L100000103889	G100000103028	US26441C2044	1	3339.5		49	2015	2055	2095	667.9	667.9	667.9	667.9	667.9	667.9	667.9	667.9	667.9	667.9	667.9	667.9
coal	United States	Americas	Northern America	Gibson Generating Station	Unit 2			667.9	operating	1976	2035	supercritical	bituminous					Duke Energy Indiana [100%]	Duke Energy Corp [100.0%]	38.3714	-87.7682	exact	East Mount Carmel	Gibson		Indiana	https://www.gem.wiki/Gibson_Generating_Station	L100000103889	G100000103029	US26441C2044	1	3339.5		48	2016	2056	2096	667.9	667.9	667.9	667.9	667.9	667.9	667.9	667.9	667.9	667.9	667.9	667.9
coal	United States	Americas	Northern America	Gibson Generating Station	Unit 3			667.9	operating	1978	2029	supercritical	bituminous					Duke Energy Indiana [100%]	Duke Energy Corp [100.0%]	38.3714	-87.7682	exact	East Mount Carmel	Gibson		Indiana	https://www.gem.wiki/Gibson_Generating_Station	L100000103889	G100000103030	US26441C2044	1	3339.5		46	2018	2058	2098	667.9	667.9	667.9	667.9	667.9	667.9	667.9	667.9	667.9	0	0	0
coal	United States	Americas	Northern America	Gibson Generating Station	Unit 4			667.9	operating	1979	2029	supercritical	bituminous					Duke Energy Indiana [100%]	Duke Energy Corp [100.0%]	38.3714	-87.7682	exact	East Mount Carmel	Gibson		Indiana	https://www.gem.wiki/Gibson_Generating_Station	L100000103889	G100000103031	US26441C2044	1	3339.5		45	2019	2059	2099	667.9	667.9	667.9	667.9	667.9	667.9	667.9	667.9	667.9	0	0	0
coal	United States	Americas	Northern America	Gibson Generating Station	Unit 5			667.9	operating	1982	2025	supercritical	bituminous					Wabash Valley Power Association [25%]; Indiana Municipal Power Agency [24%]; Duke Energy Indiana [50%]	Duke Energy Corp [50.0%]; Wabash Valley Power Association [25.0%]; Indiana Municipal Power Agency [25.0%]	38.3714	-87.7682	exact	East Mount Carmel	Gibson		Indiana	https://www.gem.wiki/Gibson_Generating_Station	L100000103889	G100000103032	US26441C2044	0.5	3339.5	3339.5	42	2022	2062	2102	333.95	333.95	333.95	333.95	333.95	0	0	0	0	0	0	0
coal	United States	Americas	Northern America	James E. Rogers Energy Complex	Unit 5		Cliffside Plant	621	operating	1972	2025	subcritical	bituminous					Duke Energy Carolinas [100%]	Duke Energy Corp [100.0%]	35.2164	-81.7624	exact	Cliffside	Cleveland		North Carolina	https://www.gem.wiki/James_E._Rogers_Energy_Complex	L100000104075	G100000101608	US26441C2044	1	1530.5	1530.5	52	2012	2052	2092	621	621	621	621	621	0	0	0	0	0	0	0
coal	United States	Americas	Northern America	Marshall Steam Station	Unit 1			350	operating	1965	2028	subcritical	bituminous					Duke Energy Carolinas [100%]	Duke Energy Corp [100.0%]	35.5979	-80.9612	exact	Terrell	Catawba		North Carolina	https://www.gem.wiki/Marshall_Steam_Station	L100000104082	G100000106696	US26441C2044	1	1996		59	2005	2045	2085	350	350	350	350	350	350	350	350	0	0	0	0
coal	United States	Americas	Northern America	Marshall Steam Station	Unit 2			350	operating	1966	2028	subcritical	bituminous					Duke Energy Carolinas [100%]	Duke Energy Corp [100.0%]	35.5979	-80.9612	exact	Terrell	Catawba		North Carolina	https://www.gem.wiki/Marshall_Steam_Station	L100000104082	G100000106697	US26441C2044	1	1996		58	2006	2046	2086	350	350	350	350	350	350	350	350	0	0	0	0
coal	United States	Americas	Northern America	Marshall Steam Station	Unit 3			648	operating	1969	2033	supercritical	bituminous					Duke Energy Carolinas [100%]	Duke Energy Corp [100.0%]	35.5979	-80.9612	exact	Terrell	Catawba		North Carolina	https://www.gem.wiki/Marshall_Steam_Station	L100000104082	G100000106698	US26441C2044	1	1996		55	2009	2049	2089	648	648	648	648	648	648	648	648	648	648	648	648
coal	United States	Americas	Northern America	Marshall Steam Station	Unit 4			648	operating	1970	2033	supercritical	bituminous					Duke Energy Carolinas [100%]	Duke Energy Corp [100.0%]	35.5979	-80.9612	exact	Terrell	Catawba		North Carolina	https://www.gem.wiki/Marshall_Steam_Station	L100000104082	G100000106699	US26441C2044	1	1996	1996	54	2010	2050	2090	648	648	648	648	648	648	648	648	648	648	648	648
coal	United States	Americas	Northern America	Mayo Generating Plant	Unit 1			735.8	operating	1983	2028	subcritical	bituminous					Duke Energy Progress [100%]	Duke Energy Corp [100.0%]	36.5278	-78.8919	exact	Bethel Hill	Person		North Carolina	https://www.gem.wiki/Mayo_Generating_Plant	L100000104083	G100000106764	US26441C2044	1	735.8	735.8	41	2023	2063	2103	735.8	735.8	735.8	735.8	735.8	735.8	735.8	735.8	0	0	0	0
coal	United States	Americas	Northern America	Miami Fort Station	Unit 7			557.1	operating	1975	2027	subcritical	bituminous					Luminant Miami Fort [100%]	Duke Energy Corp; Vistra Corp	39.1131	-84.8029	exact	North Bend	Hamilton		Ohio	https://www.gem.wiki/Miami_Fort_Station	L100000104113	G100000106903	US26441C2044	1	1114.2		49	2015	2055	2095	557.1	557.1	557.1	557.1	557.1	557.1	557.1	0	0	0	0	0
coal	United States	Americas	Northern America	Miami Fort Station	Unit 8			557.1	operating	1978	2027	subcritical	bituminous					Luminant Miami Fort [100%]	Duke Energy Corp; Vistra Corp	39.1131	-84.8029	exact	North Bend	Hamilton		Ohio	https://www.gem.wiki/Miami_Fort_Station	L100000104113	G100000106904	US26441C2044	1	1114.2	1114.2	46	2018	2058	2098	557.1	557.1	557.1	557.1	557.1	557.1	557.1	0	0	0	0	0
coal	United States	Americas	Northern America	Roxboro Steam Plant	Unit 1			410.8	operating	1966	2028	subcritical	bituminous					Duke Energy Progress [100%]	Duke Energy Corp [100.0%]	36.4841	-79.0722	exact	Roxboro	Person		North Carolina	https://www.gem.wiki/Roxboro_Steam_Plant	L100000104086	G100000108650	US26441C2044	1	2558.2		58	2006	2046	2086	410.8	410.8	410.8	410.8	410.8	410.8	410.8	410.8	0	0	0	0
coal	United States	Americas	Northern America	Roxboro Steam Plant	Unit 2			657	operating	1968	2028	subcritical	bituminous					Duke Energy Progress [100%]	Duke Energy Corp [100.0%]	36.4841	-79.0722	exact	Roxboro	Person		North Carolina	https://www.gem.wiki/Roxboro_Steam_Plant	L100000104086	G100000108651	US26441C2044	1	2558.2		56	2008	2048	2088	657	657	657	657	657	657	657	657	0	0	0	0
coal	United States	Americas	Northern America	Roxboro Steam Plant	Unit 3			745.2	operating	1973	2029	subcritical	bituminous					Duke Energy Progress [100%]	Duke Energy Corp [100.0%]	36.4841	-79.0722	exact	Roxboro	Person		North Carolina	https://www.gem.wiki/Roxboro_Steam_Plant	L100000104086	G100000108652	US26441C2044	1	2558.2		51	2013	2053	2093	745.2	745.2	745.2	745.2	745.2	745.2	745.2	745.2	745.2	0	0	0
coal	United States	Americas	Northern America	Roxboro Steam Plant	Unit 4			745.2	operating	1980	2029	subcritical	bituminous					Duke Energy Progress [100%]	Duke Energy Corp [100.0%]	36.4841	-79.0722	exact	Roxboro	Person		North Carolina	https://www.gem.wiki/Roxboro_Steam_Plant	L100000104086	G100000108653	US26441C2044	1	2558.2	2558.2	44	2020	2060	2100	745.2	745.2	745.2	745.2	745.2	745.2	745.2	745.2	745.2	0	0	0
oil/gas	United States	Americas	Northern America	Anclote power station	1			556	operating	1974		ST	NG/FO					Duke Energy Florida LLC [100.0%]	Duke Energy Corp [100.0%]	28.1844	-82.7886	exact	Holiday	Pasco		Florida	https://www.gem.wiki/Anclote_power_station	L100000401865	G100000402735	US26441C2044	1	1112		50	2014	2054	2094	556	556	556	556	556	556	556	556	556	556	556	556
oil/gas	United States	Americas	Northern America	Anclote power station	2			556	operating	1978		ST	NG/FO					Duke Energy Florida LLC [100.0%]	Duke Energy Corp [100.0%]	28.1844	-82.7886	exact	Holiday	Pasco		Florida	https://www.gem.wiki/Anclote_power_station	L100000401865	G100000402736	US26441C2044	1	1112	1112	46	2018	2058	2098	556	556	556	556	556	556	556	556	556	556	556	556
oil/gas	United States	Americas	Northern America	Asheville Plant	GT1			212	operating	1999		GT	NG/FO					Duke Energy Progress LLC [100.0%]	Duke Energy Corp [100.0%]	35.4731	-82.5417	exact	Arden	Buncombe		North Carolina	https://www.gem.wiki/Asheville_Plant	L100000104071	G100000402774	US26441C2044	1	1012		25	2039	2079	2119	212	212	212	212	212	212	212	212	212	212	212	212
oil/gas	United States	Americas	Northern America	Asheville Plant	GT2			212	operating	2000		GT	NG/FO					Duke Energy Progress LLC [100.0%]	Duke Energy Corp [100.0%]	35.4731	-82.5417	exact	Arden	Buncombe		North Carolina	https://www.gem.wiki/Asheville_Plant	L100000104071	G100000402775	US26441C2044	1	1012		24	2040	2080	2120	212	212	212	212	212	212	212	212	212	212	212	212
oil/gas	United States	Americas	Northern America	Asheville Plant	CC1			294	operating	2019		CC	NG/FO					Duke Energy Progress LLC [100.0%]	Duke Energy Corp [100.0%]	35.4731	-82.5417	exact	Arden	Buncombe		North Carolina	https://www.gem.wiki/Asheville_Plant	L100000104071	G100000401653	US26441C2044	1	1012		5	2059	2099	2139	294	294	294	294	294	294	294	294	294	294	294	294
oil/gas	United States	Americas	Northern America	Asheville Plant	CC2			294	operating	2020		CC	NG/FO					Duke Energy Progress LLC [100.0%]	Duke Energy Corp [100.0%]	35.4731	-82.5417	exact	Arden	Buncombe		North Carolina	https://www.gem.wiki/Asheville_Plant	L100000104071	G100000401654	US26441C2044	1	1012	1012	4	2060	2100	2140	294	294	294	294	294	294	294	294	294	294	294	294
oil/gas	United States	Americas	Northern America	Bayboro power station	P1			56.7	operating	1973		GT	FO					Duke Energy Florida LLC [100.0%]	Duke Energy Corp [100.0%]	27.7581	-82.6353	exact	St. Petersburg	Pinellas		Florida	https://www.gem.wiki/Bayboro_power_station	L100000409200	G100000414308	US26441C2044	1	226.8		51	2013	2053	2093	56.7	56.7	56.7	56.7	56.7	56.7	56.7	56.7	56.7	56.7	56.7	56.7
oil/gas	United States	Americas	Northern America	Bayboro power station	P2			56.7	operating	1973		GT	FO					Duke Energy Florida LLC [100.0%]	Duke Energy Corp [100.0%]	27.7581	-82.6353	exact	St. Petersburg	Pinellas		Florida	https://www.gem.wiki/Bayboro_power_station	L100000409200	G100000414307	US26441C2044	1	226.8		51	2013	2053	2093	56.7	56.7	56.7	56.7	56.7	56.7	56.7	56.7	56.7	56.7	56.7	56.7
oil/gas	United States	Americas	Northern America	Bayboro power station	P3			56.7	operating	1973		GT	FO					Duke Energy Florida LLC [100.0%]	Duke Energy Corp [100.0%]	27.7581	-82.6353	exact	St. Petersburg	Pinellas		Florida	https://www.gem.wiki/Bayboro_power_station	L100000409200	G100000414306	US26441C2044	1	226.8		51	2013	2053	2093	56.7	56.7	56.7	56.7	56.7	56.7	56.7	56.7	56.7	56.7	56.7	56.7
oil/gas	United States	Americas	Northern America	Bayboro power station	P4			56.7	operating	1973		GT	FO					Duke Energy Florida LLC [100.0%]	Duke Energy Corp [100.0%]	27.7581	-82.6353	exact	St. Petersburg	Pinellas		Florida	https://www.gem.wiki/Bayboro_power_station	L100000409200	G100000414305	US26441C2044	1	226.8	226.8	51	2013	2053	2093	56.7	56.7	56.7	56.7	56.7	56.7	56.7	56.7	56.7	56.7	56.7	56.7
oil/gas	United States	Americas	Northern America	Buck Steam Station	CC1			698	operating	2011		CC	NG/FO					Duke Energy Carolinas LLC [100.0%]	Duke Energy Corp [100.0%]	35.7133	-80.3767	exact	Salisbury	Rowan		North Carolina	https://www.gem.wiki/Buck_Steam_Station	L100000104073	G100000401655	US26441C2044	1	698	698	13	2051	2091	2131	698	698	698	698	698	698	698	698	698	698	698	698
oil/gas	United States	Americas	Northern America	Cayuga Generating Station	4			113	operating	1993		GT	FO/NG					Duke Energy Indiana LLC [100.0%]	Duke Energy Corp [100.0%]	39.9242	-87.4244	exact	Cayuga	Vermillion		Indiana	https://www.gem.wiki/Cayuga_Generating_Station	L100000103880	G100000402752	US26441C2044	1	1175	1175	31	2033	2073	2113	113	113	113	113	113	113	113	113	113	113	113	113
oil/gas	United States	Americas	Northern America	Crystal River Energy Complex	CC1		Citrus CC power station	985	operating	2018		CC	NG					Duke Energy Florida LLC [100.0%]	Duke Energy Corp [100.0%]	28.9656	-82.6977	exact	Crystal River	Citrus		Florida	https://www.gem.wiki/Crystal_River_Energy_Complex	L100000103825	G100000402124	US26441C2044	1	3448.4		6	2058	2098	2138	985	985	985	985	985	985	985	985	985	985	985	985
oil/gas	United States	Americas	Northern America	Crystal River Energy Complex	CC2		Citrus CC power station	985	operating	2018		CC	NG					Duke Energy Florida LLC [100.0%]	Duke Energy Corp [100.0%]	28.9656	-82.6977	exact	Crystal River	Citrus		Florida	https://www.gem.wiki/Crystal_River_Energy_Complex	L100000103825	G100000402125	US26441C2044	1	3448.4	3448.4	6	2058	2098	2138	985	985	985	985	985	985	985	985	985	985	985	985
oil/gas	United States	Americas	Northern America	Dan River Steam Station	CC1			698	operating	2012		CC	NG					Duke Energy Carolinas LLC [100.0%]	Duke Energy Corp [100.0%]	36.4862	-79.7208	exact	Eden	Rockingham		North Carolina	https://www.gem.wiki/Dan_River_Steam_Station	L100000104076	G100000401656	US26441C2044	1	698	698	12	2052	2092	2132	698	698	698	698	698	698	698	698	698	698	698	698
oil/gas	United States	Americas	Northern America	Darlington County power station	12			158	operating	1997		GT	NG/FO					Duke Energy Progress LLC [100.0%]	Duke Energy Corp [100.0%]	34.4185	-80.1657	exact	Hartsville	Darlington		South Carolina	https://www.gem.wiki/Darlington_County_power_station	L100000401882	G100000402777	US26441C2044	1	316		27	2037	2077	2117	158	158	158	158	158	158	158	158	158	158	158	158
oil/gas	United States	Americas	Northern America	Darlington County power station	13			158	operating	1997		GT	NG/FO					Duke Energy Progress LLC [100.0%]	Duke Energy Corp [100.0%]	34.4185	-80.1657	exact	Hartsville	Darlington		South Carolina	https://www.gem.wiki/Darlington_County_power_station	L100000401882	G100000402778	US26441C2044	1	316	316	27	2037	2077	2117	158	158	158	158	158	158	158	158	158	158	158	158
oil/gas	United States	Americas	Northern America	DeBary power station	3			66.8	operating	1975		GT	FO					Duke Energy Florida LLC [100.0%]	Duke Energy Corp [100.0%]	28.9039	-81.3323	exact	DeBary	Volusia		Florida	https://www.gem.wiki/DeBary_power_station	L100000401867	G100000414280	US26441C2044	1	749.5		49	2015	2055	2095	66.8	66.8	66.8	66.8	66.8	66.8	66.8	66.8	66.8	66.8	66.8	66.8
oil/gas	United States	Americas	Northern America	DeBary power station	5			66.8	operating	1975		GT	FO					Duke Energy Florida LLC [100.0%]	Duke Energy Corp [100.0%]	28.9039	-81.3323	exact	DeBary	Volusia		Florida	https://www.gem.wiki/DeBary_power_station	L100000401867	G100000414278	US26441C2044	1	749.5		49	2015	2055	2095	66.8	66.8	66.8	66.8	66.8	66.8	66.8	66.8	66.8	66.8	66.8	66.8
oil/gas	United States	Americas	Northern America	DeBary power station	2			66.8	operating	1976		GT	FO					Duke Energy Florida LLC [100.0%]	Duke Energy Corp [100.0%]	28.9039	-81.3323	exact	DeBary	Volusia		Florida	https://www.gem.wiki/DeBary_power_station	L100000401867	G100000414281	US26441C2044	1	749.5		48	2016	2056	2096	66.8	66.8	66.8	66.8	66.8	66.8	66.8	66.8	66.8	66.8	66.8	66.8
oil/gas	United States	Americas	Northern America	DeBary power station	4			66.8	operating	1976		GT	FO					Duke Energy Florida LLC [100.0%]	Duke Energy Corp [100.0%]	28.9039	-81.3323	exact	DeBary	Volusia		Florida	https://www.gem.wiki/DeBary_power_station	L100000401867	G100000414279	US26441C2044	1	749.5		48	2016	2056	2096	66.8	66.8	66.8	66.8	66.8	66.8	66.8	66.8	66.8	66.8	66.8	66.8
oil/gas	United States	Americas	Northern America	DeBary power station	6			66.8	operating	1976		GT	FO					Duke Energy Florida LLC [100.0%]	Duke Energy Corp [100.0%]	28.9039	-81.3323	exact	DeBary	Volusia		Florida	https://www.gem.wiki/DeBary_power_station	L100000401867	G100000414277	US26441C2044	1	749.5		48	2016	2056	2096	66.8	66.8	66.8	66.8	66.8	66.8	66.8	66.8	66.8	66.8	66.8	66.8
oil/gas	United States	Americas	Northern America	DeBary power station	7			104	operating	1992		GT	NG/FO					Duke Energy Florida LLC [100.0%]	Duke Energy Corp [100.0%]	28.9039	-81.3323	exact	DeBary	Volusia		Florida	https://www.gem.wiki/DeBary_power_station	L100000401867	G100000402737	US26441C2044	1	749.5		32	2032	2072	2112	104	104	104	104	104	104	104	104	104	104	104	104
oil/gas	United States	Americas	Northern America	DeBary power station	8			104	operating	1992		GT	NG/FO					Duke Energy Florida LLC [100.0%]	Duke Energy Corp [100.0%]	28.9039	-81.3323	exact	DeBary	Volusia		Florida	https://www.gem.wiki/DeBary_power_station	L100000401867	G100000402738	US26441C2044	1	749.5		32	2032	2072	2112	104	104	104	104	104	104	104	104	104	104	104	104
oil/gas	United States	Americas	Northern America	DeBary power station	9			104	operating	1992		GT	NG/FO					Duke Energy Florida LLC [100.0%]	Duke Energy Corp [100.0%]	28.9039	-81.3323	exact	DeBary	Volusia		Florida	https://www.gem.wiki/DeBary_power_station	L100000401867	G100000402739	US26441C2044	1	749.5		32	2032	2072	2112	104	104	104	104	104	104	104	104	104	104	104	104
oil/gas	United States	Americas	Northern America	DeBary power station	10			103.5	operating	1992		GT	FO					Duke Energy Florida LLC [100.0%]	Duke Energy Corp [100.0%]	28.9039	-81.3323	exact	DeBary	Volusia		Florida	https://www.gem.wiki/DeBary_power_station	L100000401867	G100000414282	US26441C2044	1	749.5	749.5	32	2032	2072	2112	103.5	103.5	103.5	103.5	103.5	103.5	103.5	103.5	103.5	103.5	103.5	103.5
oil/gas	United States	Americas	Northern America	Henry County power station	1			61	operating	2001		GT	NG					Duke Energy Indiana LLC [100.0%]	Duke Energy Corp [100.0%]	39.9528	-85.5039	exact	New Castle	Henry		Indiana	https://www.gem.wiki/Henry_County_power_station	L100000401876	G100000402753	US26441C2044	1	183		23	2041	2081	2121	61	61	61	61	61	61	61	61	61	61	61	61
oil/gas	United States	Americas	Northern America	Henry County power station	2			61	operating	2001		GT	NG					Duke Energy Indiana LLC [100.0%]	Duke Energy Corp [100.0%]	39.9528	-85.5039	exact	New Castle	Henry		Indiana	https://www.gem.wiki/Henry_County_power_station	L100000401876	G100000402754	US26441C2044	1	183		23	2041	2081	2121	61	61	61	61	61	61	61	61	61	61	61	61
oil/gas	United States	Americas	Northern America	Henry County power station	3			61	operating	2001		GT	NG					Duke Energy Indiana LLC [100.0%]	Duke Energy Corp [100.0%]	39.9528	-85.5039	exact	New Castle	Henry		Indiana	https://www.gem.wiki/Henry_County_power_station	L100000401876	G100000402755	US26441C2044	1	183	183	23	2041	2081	2121	61	61	61	61	61	61	61	61	61	61	61	61
oil/gas	United States	Americas	Northern America	Hines energy complex	E100			547	operating	1999		CC	NG/FO					Duke Energy Florida LLC [100.0%]	Duke Energy Corp [100.0%]	27.7882	-81.87	exact	Bartow	Polk		Florida	https://www.gem.wiki/Hines_energy_complex	L100000401868	G100000402149	US26441C2044	1	2267		25	2039	2079	2119	547	547	547	547	547	547	547	547	547	547	547	547
oil/gas	United States	Americas	Northern America	Hines energy complex	F110			548	operating	2003		CC	NG/FO					Duke Energy Florida LLC [100.0%]	Duke Energy Corp [100.0%]	27.7882	-81.87	exact	Bartow	Polk		Florida	https://www.gem.wiki/Hines_energy_complex	L100000401868	G100000402150	US26441C2044	1	2267		21	2043	2083	2123	548	548	548	548	548	548	548	548	548	548	548	548
oil/gas	United States	Americas	Northern America	Hines energy complex	G301			561	operating	2005		CC	NG/FO					Duke Energy Florida LLC [100.0%]	Duke Energy Corp [100.0%]	27.7882	-81.87	exact	Bartow	Polk		Florida	https://www.gem.wiki/Hines_energy_complex	L100000401868	G100000402151	US26441C2044	1	2267		19	2045	2085	2125	561	561	561	561	561	561	561	561	561	561	561	561
oil/gas	United States	Americas	Northern America	Hines energy complex	H400			611	operating	2007		CC	NG/FO					Duke Energy Florida LLC [100.0%]	Duke Energy Corp [100.0%]	27.7882	-81.87	exact	Bartow	Polk		Florida	https://www.gem.wiki/Hines_energy_complex	L100000401868	G100000402152	US26441C2044	1	2267	2267	17	2047	2087	2127	611	611	611	611	611	611	611	611	611	611	611	611
oil/gas	United States	Americas	Northern America	Intercession City power station	P1			56.7	operating	1974		GT	FO					Duke Energy Florida LLC [100.0%]	Duke Energy Corp [100.0%]	28.2628	-81.5486	exact	Intercession City	Osceola		Florida	https://www.gem.wiki/Intercession_City_power_station	L100000401869	G100000414258	US26441C2044	1	1198.7		50	2014	2054	2094	56.7	56.7	56.7	56.7	56.7	56.7	56.7	56.7	56.7	56.7	56.7	56.7
oil/gas	United States	Americas	Northern America	Intercession City power station	P2			56.7	operating	1974		GT	FO					Duke Energy Florida LLC [100.0%]	Duke Energy Corp [100.0%]	28.2628	-81.5486	exact	Intercession City	Osceola		Florida	https://www.gem.wiki/Intercession_City_power_station	L100000401869	G100000414257	US26441C2044	1	1198.7		50	2014	2054	2094	56.7	56.7	56.7	56.7	56.7	56.7	56.7	56.7	56.7	56.7	56.7	56.7
oil/gas	United States	Americas	Northern America	Intercession City power station	P3			56.7	operating	1974		GT	FO					Duke Energy Florida LLC [100.0%]	Duke Energy Corp [100.0%]	28.2628	-81.5486	exact	Intercession City	Osceola		Florida	https://www.gem.wiki/Intercession_City_power_station	L100000401869	G100000414256	US26441C2044	1	1198.7		50	2014	2054	2094	56.7	56.7	56.7	56.7	56.7	56.7	56.7	56.7	56.7	56.7	56.7	56.7
oil/gas	United States	Americas	Northern America	Intercession City power station	P4			56.7	operating	1974		GT	FO					Duke Energy Florida LLC [100.0%]	Duke Energy Corp [100.0%]	28.2628	-81.5486	exact	Intercession City	Osceola		Florida	https://www.gem.wiki/Intercession_City_power_station	L100000401869	G100000414255	US26441C2044	1	1198.7		50	2014	2054	2094	56.7	56.7	56.7	56.7	56.7	56.7	56.7	56.7	56.7	56.7	56.7	56.7
oil/gas	United States	Americas	Northern America	Intercession City power station	P5			56.7	operating	1974		GT	FO					Duke Energy Florida LLC [100.0%]	Duke Energy Corp [100.0%]	28.2628	-81.5486	exact	Intercession City	Osceola		Florida	https://www.gem.wiki/Intercession_City_power_station	L100000401869	G100000414254	US26441C2044	1	1198.7		50	2014	2054	2094	56.7	56.7	56.7	56.7	56.7	56.7	56.7	56.7	56.7	56.7	56.7	56.7
oil/gas	United States	Americas	Northern America	Intercession City power station	P6			56.7	operating	1974		GT	FO					Duke Energy Florida LLC [100.0%]	Duke Energy Corp [100.0%]	28.2628	-81.5486	exact	Intercession City	Osceola		Florida	https://www.gem.wiki/Intercession_City_power_station	L100000401869	G100000414253	US26441C2044	1	1198.7		50	2014	2054	2094	56.7	56.7	56.7	56.7	56.7	56.7	56.7	56.7	56.7	56.7	56.7	56.7
oil/gas	United States	Americas	Northern America	Intercession City power station	P10			104	operating	1993		GT	NG/FO					Duke Energy Florida LLC [100.0%]	Duke Energy Corp [100.0%]	28.2628	-81.5486	exact	Intercession City	Osceola		Florida	https://www.gem.wiki/Intercession_City_power_station	L100000401869	G100000402740	US26441C2044	1	1198.7		31	2033	2073	2113	104	104	104	104	104	104	104	104	104	104	104	104
oil/gas	United States	Americas	Northern America	Intercession City power station	P7			104	operating	1993		GT	NG/FO					Duke Energy Florida LLC [100.0%]	Duke Energy Corp [100.0%]	28.2628	-81.5486	exact	Intercession City	Osceola		Florida	https://www.gem.wiki/Intercession_City_power_station	L100000401869	G100000402744	US26441C2044	1	1198.7		31	2033	2073	2113	104	104	104	104	104	104	104	104	104	104	104	104
oil/gas	United States	Americas	Northern America	Intercession City power station	P8			104	operating	1993		GT	NG/FO					Duke Energy Florida LLC [100.0%]	Duke Energy Corp [100.0%]	28.2628	-81.5486	exact	Intercession City	Osceola		Florida	https://www.gem.wiki/Intercession_City_power_station	L100000401869	G100000402745	US26441C2044	1	1198.7		31	2033	2073	2113	104	104	104	104	104	104	104	104	104	104	104	104
oil/gas	United States	Americas	Northern America	Intercession City power station	P9			104	operating	1993		GT	NG/FO					Duke Energy Florida LLC [100.0%]	Duke Energy Corp [100.0%]	28.2628	-81.5486	exact	Intercession City	Osceola		Florida	https://www.gem.wiki/Intercession_City_power_station	L100000401869	G100000402746	US26441C2044	1	1198.7		31	2033	2073	2113	104	104	104	104	104	104	104	104	104	104	104	104
oil/gas	United States	Americas	Northern America	Intercession City power station	P11			148.5	operating	1997		GT	FO					Duke Energy Florida LLC [66.7%]; Georgia Power Co [33.3%]	Duke Energy Corp [66.7%]; Southern Co [33.3%]	28.2628	-81.5486	exact	Intercession City	Osceola		Florida	https://www.gem.wiki/Intercession_City_power_station	L100000401869	G100000414252	US26441C2044	0.667	1198.7		27	2037	2077	2117	99.0495	99.0495	99.0495	99.0495	99.0495	99.0495	99.0495	99.0495	99.0495	99.0495	99.0495	99.0495
oil/gas	United States	Americas	Northern America	Intercession City power station	P12			98	operating	2000		GT	NG/FO					Duke Energy Florida LLC [100.0%]	Duke Energy Corp [100.0%]	28.2628	-81.5486	exact	Intercession City	Osceola		Florida	https://www.gem.wiki/Intercession_City_power_station	L100000401869	G100000402741	US26441C2044	1	1198.7		24	2040	2080	2120	98	98	98	98	98	98	98	98	98	98	98	98
oil/gas	United States	Americas	Northern America	Intercession City power station	P13			98	operating	2000		GT	NG/FO					Duke Energy Florida LLC [100.0%]	Duke Energy Corp [100.0%]	28.2628	-81.5486	exact	Intercession City	Osceola		Florida	https://www.gem.wiki/Intercession_City_power_station	L100000401869	G100000402742	US26441C2044	1	1198.7		24	2040	2080	2120	98	98	98	98	98	98	98	98	98	98	98	98
oil/gas	United States	Americas	Northern America	Intercession City power station	P14			98	operating	2000		GT	NG/FO					Duke Energy Florida LLC [100.0%]	Duke Energy Corp [100.0%]	28.2628	-81.5486	exact	Intercession City	Osceola		Florida	https://www.gem.wiki/Intercession_City_power_station	L100000401869	G100000402743	US26441C2044	1	1198.7	1198.7	24	2040	2080	2120	98	98	98	98	98	98	98	98	98	98	98	98
oil/gas	United States	Americas	Northern America	James E. Rogers Energy Complex	6			909.5	operating	2018		ST	NG/C					Duke Energy Carolinas LLC [100.0%]	Duke Energy Corp [100.0%]	35.22	-81.7594	exact	Cliffside	Cleveland		North Carolina	https://www.gem.wiki/James_E._Rogers_Energy_Complex	L100000104075	G100000101609	US26441C2044	1	1530.5	1530.5	6	2058	2098	2138	909.5	909.5	909.5	909.5	909.5	909.5	909.5	909.5	909.5	909.5	909.5	909.5
oil/gas	United States	Americas	Northern America	L V Sutton Combined Cycle power station	1			730	operating	2013		CC	NG/FO					Duke Energy Progress LLC [100.0%]	Duke Energy Corp [100.0%]	34.2831	-77.9853	exact	Wilmington	New Hanover		North Carolina	https://www.gem.wiki/L_V_Sutton_Combined_Cycle_power_station	L100000401883	G100000402067	US26441C2044	1	852		11	2053	2093	2133	730	730	730	730	730	730	730	730	730	730	730	730
oil/gas	United States	Americas	Northern America	L V Sutton Combined Cycle power station	CT004			61	operating	2017		GT	NG/FO					Duke Energy Progress LLC [100.0%]	Duke Energy Corp [100.0%]	34.2831	-77.9853	exact	Wilmington	New Hanover		North Carolina	https://www.gem.wiki/L_V_Sutton_Combined_Cycle_power_station	L100000401883	G100000402781	US26441C2044	1	852		7	2057	2097	2137	61	61	61	61	61	61	61	61	61	61	61	61
oil/gas	United States	Americas	Northern America	L V Sutton Combined Cycle power station	CT005			61	operating	2017		GT	NG/FO					Duke Energy Progress LLC [100.0%]	Duke Energy Corp [100.0%]	34.2831	-77.9853	exact	Wilmington	New Hanover		North Carolina	https://www.gem.wiki/L_V_Sutton_Combined_Cycle_power_station	L100000401883	G100000402782	US26441C2044	1	852	852	7	2057	2097	2137	61	61	61	61	61	61	61	61	61	61	61	61
oil/gas	United States	Americas	Northern America	Lee Steam Plant	CC1		Lee Combined Cycle Plant	1068	operating	2012		CC	NG/FO					Duke Energy Progress LLC [100.0%]	Duke Energy Corp [100.0%]	35.3736	-78.0894	exact	Goldsboro	Wayne		North Carolina	https://www.gem.wiki/Lee_Steam_Plant	L100000104080	G100000402060	US26441C2044	1	1068	1068	12	2052	2092	2132	1068	1068	1068	1068	1068	1068	1068	1068	1068	1068	1068	1068
oil/gas	United States	Americas	Northern America	Lincoln Combustion power station	1			110	operating	1995		GT	NG/FO					Duke Energy Carolinas LLC [100.0%]	Duke Energy Corp [100.0%]	35.4317	-81.0347	exact	Stanley	Lincoln		North Carolina	https://www.gem.wiki/Lincoln_Combustion_power_station	L100000401861	G100000402703	US26441C2044	1	2296		29	2035	2075	2115	110	110	110	110	110	110	110	110	110	110	110	110
oil/gas	United States	Americas	Northern America	Lincoln Combustion power station	2			110	operating	1995		GT	NG/FO					Duke Energy Carolinas LLC [100.0%]	Duke Energy Corp [100.0%]	35.4317	-81.0347	exact	Stanley	Lincoln		North Carolina	https://www.gem.wiki/Lincoln_Combustion_power_station	L100000401861	G100000402711	US26441C2044	1	2296		29	2035	2075	2115	110	110	110	110	110	110	110	110	110	110	110	110
oil/gas	United States	Americas	Northern America	Lincoln Combustion power station	3			110	operating	1995		GT	NG/FO					Duke Energy Carolinas LLC [100.0%]	Duke Energy Corp [100.0%]	35.4317	-81.0347	exact	Stanley	Lincoln		North Carolina	https://www.gem.wiki/Lincoln_Combustion_power_station	L100000401861	G100000402712	US26441C2044	1	2296		29	2035	2075	2115	110	110	110	110	110	110	110	110	110	110	110	110
oil/gas	United States	Americas	Northern America	Lincoln Combustion power station	4			110	operating	1995		GT	NG/FO					Duke Energy Carolinas LLC [100.0%]	Duke Energy Corp [100.0%]	35.4317	-81.0347	exact	Stanley	Lincoln		North Carolina	https://www.gem.wiki/Lincoln_Combustion_power_station	L100000401861	G100000402713	US26441C2044	1	2296		29	2035	2075	2115	110	110	110	110	110	110	110	110	110	110	110	110
oil/gas	United States	Americas	Northern America	Lincoln Combustion power station	5			110	operating	1995		GT	NG/FO					Duke Energy Carolinas LLC [100.0%]	Duke Energy Corp [100.0%]	35.4317	-81.0347	exact	Stanley	Lincoln		North Carolina	https://www.gem.wiki/Lincoln_Combustion_power_station	L100000401861	G100000402714	US26441C2044	1	2296		29	2035	2075	2115	110	110	110	110	110	110	110	110	110	110	110	110
oil/gas	United States	Americas	Northern America	Lincoln Combustion power station	6			110	operating	1995		GT	NG/FO					Duke Energy Carolinas LLC [100.0%]	Duke Energy Corp [100.0%]	35.4317	-81.0347	exact	Stanley	Lincoln		North Carolina	https://www.gem.wiki/Lincoln_Combustion_power_station	L100000401861	G100000402715	US26441C2044	1	2296		29	2035	2075	2115	110	110	110	110	110	110	110	110	110	110	110	110
oil/gas	United States	Americas	Northern America	Lincoln Combustion power station	7			110	operating	1995		GT	NG/FO					Duke Energy Carolinas LLC [100.0%]	Duke Energy Corp [100.0%]	35.4317	-81.0347	exact	Stanley	Lincoln		North Carolina	https://www.gem.wiki/Lincoln_Combustion_power_station	L100000401861	G100000402716	US26441C2044	1	2296		29	2035	2075	2115	110	110	110	110	110	110	110	110	110	110	110	110
oil/gas	United States	Americas	Northern America	Lincoln Combustion power station	8			110	operating	1995		GT	NG/FO					Duke Energy Carolinas LLC [100.0%]	Duke Energy Corp [100.0%]	35.4317	-81.0347	exact	Stanley	Lincoln		North Carolina	https://www.gem.wiki/Lincoln_Combustion_power_station	L100000401861	G100000402717	US26441C2044	1	2296		29	2035	2075	2115	110	110	110	110	110	110	110	110	110	110	110	110
oil/gas	United States	Americas	Northern America	Lincoln Combustion power station	9			110	operating	1995		GT	NG/FO					Duke Energy Carolinas LLC [100.0%]	Duke Energy Corp [100.0%]	35.4317	-81.0347	exact	Stanley	Lincoln		North Carolina	https://www.gem.wiki/Lincoln_Combustion_power_station	L100000401861	G100000402718	US26441C2044	1	2296		29	2035	2075	2115	110	110	110	110	110	110	110	110	110	110	110	110
oil/gas	United States	Americas	Northern America	Lincoln Combustion power station	10			110	operating	1995		GT	NG/FO					Duke Energy Carolinas LLC [100.0%]	Duke Energy Corp [100.0%]	35.4317	-81.0347	exact	Stanley	Lincoln		North Carolina	https://www.gem.wiki/Lincoln_Combustion_power_station	L100000401861	G100000402704	US26441C2044	1	2296		29	2035	2075	2115	110	110	110	110	110	110	110	110	110	110	110	110
oil/gas	United States	Americas	Northern America	Lincoln Combustion power station	11			110	operating	1995		GT	NG/FO					Duke Energy Carolinas LLC [100.0%]	Duke Energy Corp [100.0%]	35.4317	-81.0347	exact	Stanley	Lincoln		North Carolina	https://www.gem.wiki/Lincoln_Combustion_power_station	L100000401861	G100000402705	US26441C2044	1	2296		29	2035	2075	2115	110	110	110	110	110	110	110	110	110	110	110	110
oil/gas	United States	Americas	Northern America	Lincoln Combustion power station	12			110	operating	1995		GT	NG/FO					Duke Energy Carolinas LLC [100.0%]	Duke Energy Corp [100.0%]	35.4317	-81.0347	exact	Stanley	Lincoln		North Carolina	https://www.gem.wiki/Lincoln_Combustion_power_station	L100000401861	G100000402706	US26441C2044	1	2296		29	2035	2075	2115	110	110	110	110	110	110	110	110	110	110	110	110
oil/gas	United States	Americas	Northern America	Lincoln Combustion power station	13			110	operating	1996		GT	NG/FO					Duke Energy Carolinas LLC [100.0%]	Duke Energy Corp [100.0%]	35.4317	-81.0347	exact	Stanley	Lincoln		North Carolina	https://www.gem.wiki/Lincoln_Combustion_power_station	L100000401861	G100000402707	US26441C2044	1	2296		28	2036	2076	2116	110	110	110	110	110	110	110	110	110	110	110	110
oil/gas	United States	Americas	Northern America	Lincoln Combustion power station	14			110	operating	1996		GT	NG/FO					Duke Energy Carolinas LLC [100.0%]	Duke Energy Corp [100.0%]	35.4317	-81.0347	exact	Stanley	Lincoln		North Carolina	https://www.gem.wiki/Lincoln_Combustion_power_station	L100000401861	G100000402708	US26441C2044	1	2296		28	2036	2076	2116	110	110	110	110	110	110	110	110	110	110	110	110
oil/gas	United States	Americas	Northern America	Lincoln Combustion power station	15			110	operating	1996		GT	NG/FO					Duke Energy Carolinas LLC [100.0%]	Duke Energy Corp [100.0%]	35.4317	-81.0347	exact	Stanley	Lincoln		North Carolina	https://www.gem.wiki/Lincoln_Combustion_power_station	L100000401861	G100000402709	US26441C2044	1	2296		28	2036	2076	2116	110	110	110	110	110	110	110	110	110	110	110	110
oil/gas	United States	Americas	Northern America	Lincoln Combustion power station	16			110	operating	1996		GT	NG/FO					Duke Energy Carolinas LLC [100.0%]	Duke Energy Corp [100.0%]	35.4317	-81.0347	exact	Stanley	Lincoln		North Carolina	https://www.gem.wiki/Lincoln_Combustion_power_station	L100000401861	G100000402710	US26441C2044	1	2296		28	2036	2076	2116	110	110	110	110	110	110	110	110	110	110	110	110
oil/gas	United States	Americas	Northern America	Lincoln Combustion power station	17			536	construction	2024		GT	NG/FO					Duke Energy Carolinas LLC [100.0%]	Duke Energy Corp [100.0%]	35.4317	-81.0347	exact	Stanley	Lincoln		North Carolina	https://www.gem.wiki/Lincoln_Combustion_power_station	L100000401861	G100000409461	US26441C2044	1	2296	2296	0	2064	2104	2144	0	0	0	0	536	536	536	536	536	536	536	536
oil/gas	United States	Americas	Northern America	Madison power station	CT1			87	operating	2000		GT	NG					Duke Energy Indiana LLC [100.0%]	Duke Energy Corp [100.0%]	39.4522	-84.4647	exact	Trenton	Butler		Ohio	https://www.gem.wiki/Madison_power_station	L100000401877	G100000402756	US26441C2044	1	696		24	2040	2080	2120	87	87	87	87	87	87	87	87	87	87	87	87
oil/gas	United States	Americas	Northern America	Madison power station	CT2			87	operating	2000		GT	NG					Duke Energy Indiana LLC [100.0%]	Duke Energy Corp [100.0%]	39.4522	-84.4647	exact	Trenton	Butler		Ohio	https://www.gem.wiki/Madison_power_station	L100000401877	G100000402757	US26441C2044	1	696		24	2040	2080	2120	87	87	87	87	87	87	87	87	87	87	87	87
oil/gas	United States	Americas	Northern America	Madison power station	CT3			87	operating	2000		GT	NG					Duke Energy Indiana LLC [100.0%]	Duke Energy Corp [100.0%]	39.4522	-84.4647	exact	Trenton	Butler		Ohio	https://www.gem.wiki/Madison_power_station	L100000401877	G100000402758	US26441C2044	1	696		24	2040	2080	2120	87	87	87	87	87	87	87	87	87	87	87	87
oil/gas	United States	Americas	Northern America	Madison power station	CT4			87	operating	2000		GT	NG					Duke Energy Indiana LLC [100.0%]	Duke Energy Corp [100.0%]	39.4522	-84.4647	exact	Trenton	Butler		Ohio	https://www.gem.wiki/Madison_power_station	L100000401877	G100000402759	US26441C2044	1	696		24	2040	2080	2120	87	87	87	87	87	87	87	87	87	87	87	87
oil/gas	United States	Americas	Northern America	Madison power station	CT5			87	operating	2000		GT	NG					Duke Energy Indiana LLC [100.0%]	Duke Energy Corp [100.0%]	39.4522	-84.4647	exact	Trenton	Butler		Ohio	https://www.gem.wiki/Madison_power_station	L100000401877	G100000402760	US26441C2044	1	696		24	2040	2080	2120	87	87	87	87	87	87	87	87	87	87	87	87
oil/gas	United States	Americas	Northern America	Madison power station	CT6			87	operating	2000		GT	NG					Duke Energy Indiana LLC [100.0%]	Duke Energy Corp [100.0%]	39.4522	-84.4647	exact	Trenton	Butler		Ohio	https://www.gem.wiki/Madison_power_station	L100000401877	G100000402761	US26441C2044	1	696		24	2040	2080	2120	87	87	87	87	87	87	87	87	87	87	87	87
oil/gas	United States	Americas	Northern America	Madison power station	CT7			87	operating	2000		GT	NG					Duke Energy Indiana LLC [100.0%]	Duke Energy Corp [100.0%]	39.4522	-84.4647	exact	Trenton	Butler		Ohio	https://www.gem.wiki/Madison_power_station	L100000401877	G100000402762	US26441C2044	1	696		24	2040	2080	2120	87	87	87	87	87	87	87	87	87	87	87	87
oil/gas	United States	Americas	Northern America	Madison power station	CT8			87	operating	2000		GT	NG					Duke Energy Indiana LLC [100.0%]	Duke Energy Corp [100.0%]	39.4522	-84.4647	exact	Trenton	Butler		Ohio	https://www.gem.wiki/Madison_power_station	L100000401877	G100000402763	US26441C2044	1	696	696	24	2040	2080	2120	87	87	87	87	87	87	87	87	87	87	87	87
oil/gas	United States	Americas	Northern America	Mill Creek (SC) power station	1			100	operating	2002		GT	NG/FO					Duke Energy Carolinas LLC [100.0%]	Duke Energy Corp [100.0%]	35.1597	-81.4306	exact	Blacksburg	Cherokee		South Carolina	https://www.gem.wiki/Mill_Creek_(SC)_power_station	L100000401862	G100000402719	US26441C2044	1	800		22	2042	2082	2122	100	100	100	100	100	100	100	100	100	100	100	100
oil/gas	United States	Americas	Northern America	Mill Creek (SC) power station	2			100	operating	2002		GT	NG/FO					Duke Energy Carolinas LLC [100.0%]	Duke Energy Corp [100.0%]	35.1597	-81.4306	exact	Blacksburg	Cherokee		South Carolina	https://www.gem.wiki/Mill_Creek_(SC)_power_station	L100000401862	G100000402720	US26441C2044	1	800		22	2042	2082	2122	100	100	100	100	100	100	100	100	100	100	100	100
oil/gas	United States	Americas	Northern America	Mill Creek (SC) power station	3			100	operating	2002		GT	NG/FO					Duke Energy Carolinas LLC [100.0%]	Duke Energy Corp [100.0%]	35.1597	-81.4306	exact	Blacksburg	Cherokee		South Carolina	https://www.gem.wiki/Mill_Creek_(SC)_power_station	L100000401862	G100000402721	US26441C2044	1	800		22	2042	2082	2122	100	100	100	100	100	100	100	100	100	100	100	100
oil/gas	United States	Americas	Northern America	Mill Creek (SC) power station	4			100	operating	2002		GT	NG/FO					Duke Energy Carolinas LLC [100.0%]	Duke Energy Corp [100.0%]	35.1597	-81.4306	exact	Blacksburg	Cherokee		South Carolina	https://www.gem.wiki/Mill_Creek_(SC)_power_station	L100000401862	G100000402722	US26441C2044	1	800		22	2042	2082	2122	100	100	100	100	100	100	100	100	100	100	100	100
oil/gas	United States	Americas	Northern America	Mill Creek (SC) power station	5			100	operating	2003		GT	NG/FO					Duke Energy Carolinas LLC [100.0%]	Duke Energy Corp [100.0%]	35.1597	-81.4306	exact	Blacksburg	Cherokee		South Carolina	https://www.gem.wiki/Mill_Creek_(SC)_power_station	L100000401862	G100000402723	US26441C2044	1	800		21	2043	2083	2123	100	100	100	100	100	100	100	100	100	100	100	100
oil/gas	United States	Americas	Northern America	Mill Creek (SC) power station	6			100	operating	2003		GT	NG/FO					Duke Energy Carolinas LLC [100.0%]	Duke Energy Corp [100.0%]	35.1597	-81.4306	exact	Blacksburg	Cherokee		South Carolina	https://www.gem.wiki/Mill_Creek_(SC)_power_station	L100000401862	G100000402724	US26441C2044	1	800		21	2043	2083	2123	100	100	100	100	100	100	100	100	100	100	100	100
oil/gas	United States	Americas	Northern America	Mill Creek (SC) power station	7			100	operating	2003		GT	NG/FO					Duke Energy Carolinas LLC [100.0%]	Duke Energy Corp [100.0%]	35.1597	-81.4306	exact	Blacksburg	Cherokee		South Carolina	https://www.gem.wiki/Mill_Creek_(SC)_power_station	L100000401862	G100000402725	US26441C2044	1	800		21	2043	2083	2123	100	100	100	100	100	100	100	100	100	100	100	100
oil/gas	United States	Americas	Northern America	Mill Creek (SC) power station	8			100	operating	2003		GT	NG/FO					Duke Energy Carolinas LLC [100.0%]	Duke Energy Corp [100.0%]	35.1597	-81.4306	exact	Blacksburg	Cherokee		South Carolina	https://www.gem.wiki/Mill_Creek_(SC)_power_station	L100000401862	G100000402726	US26441C2044	1	800	800	21	2043	2083	2123	100	100	100	100	100	100	100	100	100	100	100	100
oil/gas	United States	Americas	Northern America	Noblesville power station	CC1			283	operating	2003		CC	NG					Duke Energy Indiana LLC [100.0%]	Duke Energy Corp [100.0%]	40.0969	-85.9714	exact	Noblesville	Hamilton		Indiana	https://www.gem.wiki/Noblesville_power_station	L100000401878	G100000401582	US26441C2044	1	283	283	21	2043	2083	2123	283	283	283	283	283	283	283	283	283	283	283	283
oil/gas	United States	Americas	Northern America	Osprey energy center power plant	COEC			644	operating	2004		CC	NG					Duke Energy Florida LLC [100.0%]	Duke Energy Corp [100.0%]	28.0525	-81.8083	exact	Auburndale	Polk		Florida	https://www.gem.wiki/Osprey_energy_center_power_plant	L100000401870	G100000401919	US26441C2044	1	644	644	20	2044	2084	2124	644	644	644	644	644	644	644	644	644	644	644	644
oil/gas	United States	Americas	Northern America	P L Bartow power station	P1			55.4	operating	1972		GT	FO					Duke Energy Florida LLC [100.0%]	Duke Energy Corp [100.0%]	27.8595	-82.6018	exact	St. Petersburg	Pinellas		Florida	https://www.gem.wiki/P_L_Bartow_power_station	L100000401871	G100000414219	US26441C2044	1	1474.8		52	2012	2052	2092	55.4	55.4	55.4	55.4	55.4	55.4	55.4	55.4	55.4	55.4	55.4	55.4
oil/gas	United States	Americas	Northern America	P L Bartow power station	P2			55	operating	1972		GT	NG/FO					Duke Energy Florida LLC [100.0%]	Duke Energy Corp [100.0%]	27.8595	-82.6018	exact	St. Petersburg	Pinellas		Florida	https://www.gem.wiki/P_L_Bartow_power_station	L100000401871	G100000402747	US26441C2044	1	1474.8		52	2012	2052	2092	55	55	55	55	55	55	55	55	55	55	55	55
oil/gas	United States	Americas	Northern America	P L Bartow power station	P3			55.4	operating	1972		GT	FO					Duke Energy Florida LLC [100.0%]	Duke Energy Corp [100.0%]	27.8595	-82.6018	exact	St. Petersburg	Pinellas		Florida	https://www.gem.wiki/P_L_Bartow_power_station	L100000401871	G100000414218	US26441C2044	1	1474.8		52	2012	2052	2092	55.4	55.4	55.4	55.4	55.4	55.4	55.4	55.4	55.4	55.4	55.4	55.4
oil/gas	United States	Americas	Northern America	P L Bartow power station	P4			55	operating	1972		GT	NG/FO					Duke Energy Florida LLC [100.0%]	Duke Energy Corp [100.0%]	27.8595	-82.6018	exact	St. Petersburg	Pinellas		Florida	https://www.gem.wiki/P_L_Bartow_power_station	L100000401871	G100000402748	US26441C2044	1	1474.8		52	2012	2052	2092	55	55	55	55	55	55	55	55	55	55	55	55
oil/gas	United States	Americas	Northern America	P L Bartow power station	G981			1254	operating	2009		CC	NG/FO					Duke Energy Florida LLC [100.0%]	Duke Energy Corp [100.0%]	27.8595	-82.6018	exact	St. Petersburg	Pinellas		Florida	https://www.gem.wiki/P_L_Bartow_power_station	L100000401871	G100000402127	US26441C2044	1	1474.8	1474.8	15	2049	2089	2129	1254	1254	1254	1254	1254	1254	1254	1254	1254	1254	1254	1254
oil/gas	United States	Americas	Northern America	Rockingham County CT Station	CT1			196	mothballed	2000		GT	NG/FO					Duke Energy Carolinas LLC [100.0%]	Duke Energy Corp [100.0%]	36.3297	-79.8297	exact	Reidsville	Rockingham		North Carolina	https://www.gem.wiki/Rockingham_County_CT_Station	L100000401863	G100000402727	US26441C2044	1	980		24	2040	2080	2120	0	0	0	0	0	0	0	0	0	0	0	0
oil/gas	United States	Americas	Northern America	Rockingham County CT Station	CT2			196	mothballed	2000		GT	NG/FO					Duke Energy Carolinas LLC [100.0%]	Duke Energy Corp [100.0%]	36.3297	-79.8297	exact	Reidsville	Rockingham		North Carolina	https://www.gem.wiki/Rockingham_County_CT_Station	L100000401863	G100000402728	US26441C2044	1	980		24	2040	2080	2120	0	0	0	0	0	0	0	0	0	0	0	0
oil/gas	United States	Americas	Northern America	Rockingham County CT Station	CT3			196	mothballed	2000		GT	NG/FO					Duke Energy Carolinas LLC [100.0%]	Duke Energy Corp [100.0%]	36.3297	-79.8297	exact	Reidsville	Rockingham		North Carolina	https://www.gem.wiki/Rockingham_County_CT_Station	L100000401863	G100000402729	US26441C2044	1	980		24	2040	2080	2120	0	0	0	0	0	0	0	0	0	0	0	0
oil/gas	United States	Americas	Northern America	Rockingham County CT Station	CT4			196	mothballed	2000		GT	NG/FO					Duke Energy Carolinas LLC [100.0%]	Duke Energy Corp [100.0%]	36.3297	-79.8297	exact	Reidsville	Rockingham		North Carolina	https://www.gem.wiki/Rockingham_County_CT_Station	L100000401863	G100000402730	US26441C2044	1	980		24	2040	2080	2120	0	0	0	0	0	0	0	0	0	0	0	0
oil/gas	United States	Americas	Northern America	Rockingham County CT Station	CT5			196	mothballed	2000		GT	NG/FO					Duke Energy Carolinas LLC [100.0%]	Duke Energy Corp [100.0%]	36.3297	-79.8297	exact	Reidsville	Rockingham		North Carolina	https://www.gem.wiki/Rockingham_County_CT_Station	L100000401863	G100000402731	US26441C2044	1	980	980	24	2040	2080	2120	0	0	0	0	0	0	0	0	0	0	0	0
oil/gas	United States	Americas	Northern America	Sherwood H Smith Jr energy complex	1			199	operating	2001		GT	FO/NG					Duke Energy Progress LLC [100.0%]	Duke Energy Corp [100.0%]	34.8392	-79.7406	exact	Hamlet	Richmond		North Carolina	https://www.gem.wiki/Sherwood_H_Smith_Jr_energy_complex	L100000401885	G100000402783	US26441C2044	1	2243		23	2041	2081	2121	199	199	199	199	199	199	199	199	199	199	199	199
oil/gas	United States	Americas	Northern America	Sherwood H Smith Jr energy complex	2			199	operating	2001		GT	FO/NG					Duke Energy Progress LLC [100.0%]	Duke Energy Corp [100.0%]	34.8392	-79.7406	exact	Hamlet	Richmond		North Carolina	https://www.gem.wiki/Sherwood_H_Smith_Jr_energy_complex	L100000401885	G100000402784	US26441C2044	1	2243		23	2041	2081	2121	199	199	199	199	199	199	199	199	199	199	199	199
oil/gas	United States	Americas	Northern America	Sherwood H Smith Jr energy complex	3			199	operating	2001		GT	FO/NG					Duke Energy Progress LLC [100.0%]	Duke Energy Corp [100.0%]	34.8392	-79.7406	exact	Hamlet	Richmond		North Carolina	https://www.gem.wiki/Sherwood_H_Smith_Jr_energy_complex	L100000401885	G100000402785	US26441C2044	1	2243		23	2041	2081	2121	199	199	199	199	199	199	199	199	199	199	199	199
oil/gas	United States	Americas	Northern America	Sherwood H Smith Jr energy complex	4			199	operating	2001		GT	FO/NG					Duke Energy Progress LLC [100.0%]	Duke Energy Corp [100.0%]	34.8392	-79.7406	exact	Hamlet	Richmond		North Carolina	https://www.gem.wiki/Sherwood_H_Smith_Jr_energy_complex	L100000401885	G100000402786	US26441C2044	1	2243		23	2041	2081	2121	199	199	199	199	199	199	199	199	199	199	199	199
oil/gas	United States	Americas	Northern America	Sherwood H Smith Jr energy complex	6			199	operating	2002		GT	NG/FO					Duke Energy Progress LLC [100.0%]	Duke Energy Corp [100.0%]	34.8392	-79.7406	exact	Hamlet	Richmond		North Carolina	https://www.gem.wiki/Sherwood_H_Smith_Jr_energy_complex	L100000401885	G100000402787	US26441C2044	1	2243		22	2042	2082	2122	199	199	199	199	199	199	199	199	199	199	199	199
oil/gas	United States	Americas	Northern America	Sherwood H Smith Jr energy complex	CC1			594	operating	2002		CC	NG/FO					Duke Energy Progress LLC [100.0%]	Duke Energy Corp [100.0%]	34.8392	-79.7406	exact	Hamlet	Richmond		North Carolina	https://www.gem.wiki/Sherwood_H_Smith_Jr_energy_complex	L100000401885	G100000402172	US26441C2044	1	2243		22	2042	2082	2122	594	594	594	594	594	594	594	594	594	594	594	594
oil/gas	United States	Americas	Northern America	Sherwood H Smith Jr energy complex	CC2			654	operating	2011		CC	NG/FO					Duke Energy Progress LLC [100.0%]	Duke Energy Corp [100.0%]	34.8392	-79.7406	exact	Hamlet	Richmond		North Carolina	https://www.gem.wiki/Sherwood_H_Smith_Jr_energy_complex	L100000401885	G100000402173	US26441C2044	1	2243	2243	13	2051	2091	2131	654	654	654	654	654	654	654	654	654	654	654	654
oil/gas	United States	Americas	Northern America	Suwannee River power station	P1			66	operating	1980		GT	NG/FO					Duke Energy Florida LLC [100.0%]	Duke Energy Corp [100.0%]	30.3764	-83.1806	exact	Live Oak	Suwannee		Florida	https://www.gem.wiki/Suwannee_River_power_station	L100000401872	G100000402749	US26441C2044	1	197.9		44	2020	2060	2100	66	66	66	66	66	66	66	66	66	66	66	66
oil/gas	United States	Americas	Northern America	Suwannee River power station	P2			65.9	operating	1980		GT	FO					Duke Energy Florida LLC [100.0%]	Duke Energy Corp [100.0%]	30.3764	-83.1806	exact	Live Oak	Suwannee		Florida	https://www.gem.wiki/Suwannee_River_power_station	L100000401872	G100000414184	US26441C2044	1	197.9		44	2020	2060	2100	65.9	65.9	65.9	65.9	65.9	65.9	65.9	65.9	65.9	65.9	65.9	65.9
oil/gas	United States	Americas	Northern America	Suwannee River power station	P3			66	operating	1980		GT	NG/FO					Duke Energy Florida LLC [100.0%]	Duke Energy Corp [100.0%]	30.3764	-83.1806	exact	Live Oak	Suwannee		Florida	https://www.gem.wiki/Suwannee_River_power_station	L100000401872	G100000402750	US26441C2044	1	197.9	197.9	44	2020	2060	2100	66	66	66	66	66	66	66	66	66	66	66	66
oil/gas	United States	Americas	Northern America	Tiger Bay power station	G200			278	operating	1997		CC	NG					Duke Energy Florida LLC [100.0%]	Duke Energy Corp [100.0%]	27.7464	-81.8495	exact	Ft. Meade	Polk		Florida	https://www.gem.wiki/Tiger_Bay_power_station	L100000401873	G100000402164	US26441C2044	1	278	278	27	2037	2077	2117	278	278	278	278	278	278	278	278	278	278	278	278
oil/gas	United States	Americas	Northern America	University of Florida power station	P1			54	operating	1994		GT	NG					Duke Energy Florida LLC [100.0%]	Duke Energy Corp [100.0%]	29.6403	-82.3486	exact	Gainesville	Alachua		Florida	https://www.gem.wiki/University_of_Florida_power_station	L100000401874	G100000402751	US26441C2044	1	54	54	30	2034	2074	2114	54	54	54	54	54	54	54	54	54	54	54	54
oil/gas	United States	Americas	Northern America	Vermillion energy facility	CT1			87	operating	2000		GT	NG					Duke Energy Indiana LLC [62.5%]; Wabash Valley Power Association Inc [37.5%]	Duke Energy Corp [62.5%]	39.9223	-87.4464	exact	Cayuga	Vermillion		Indiana	https://www.gem.wiki/Vermillion_energy_facility	L100000401550	G100000402247	US26441C2044	0.625	696		24	2040	2080	2120	54.375	54.375	54.375	54.375	54.375	54.375	54.375	54.375	54.375	54.375	54.375	54.375
oil/gas	United States	Americas	Northern America	Vermillion energy facility	CT2			87	operating	2000		GT	NG					Duke Energy Indiana LLC [62.5%]; Wabash Valley Power Association Inc [37.5%]	Duke Energy Corp [62.5%]	39.9223	-87.4464	exact	Cayuga	Vermillion		Indiana	https://www.gem.wiki/Vermillion_energy_facility	L100000401550	G100000402248	US26441C2044	0.625	696		24	2040	2080	2120	54.375	54.375	54.375	54.375	54.375	54.375	54.375	54.375	54.375	54.375	54.375	54.375
oil/gas	United States	Americas	Northern America	Vermillion energy facility	CT3			87	operating	2000		GT	NG					Duke Energy Indiana LLC [62.5%]; Wabash Valley Power Association Inc [37.5%]	Duke Energy Corp [62.5%]	39.9223	-87.4464	exact	Cayuga	Vermillion		Indiana	https://www.gem.wiki/Vermillion_energy_facility	L100000401550	G100000402249	US26441C2044	0.625	696		24	2040	2080	2120	54.375	54.375	54.375	54.375	54.375	54.375	54.375	54.375	54.375	54.375	54.375	54.375
oil/gas	United States	Americas	Northern America	Vermillion energy facility	CT4			87	operating	2000		GT	NG					Duke Energy Indiana LLC [62.5%]; Wabash Valley Power Association Inc [37.5%]	Duke Energy Corp [62.5%]	39.9223	-87.4464	exact	Cayuga	Vermillion		Indiana	https://www.gem.wiki/Vermillion_energy_facility	L100000401550	G100000402250	US26441C2044	0.625	696		24	2040	2080	2120	54.375	54.375	54.375	54.375	54.375	54.375	54.375	54.375	54.375	54.375	54.375	54.375
oil/gas	United States	Americas	Northern America	Vermillion energy facility	CT5			87	operating	2000		GT	NG					Duke Energy Indiana LLC [62.5%]; Wabash Valley Power Association Inc [37.5%]	Duke Energy Corp [62.5%]	39.9223	-87.4464	exact	Cayuga	Vermillion		Indiana	https://www.gem.wiki/Vermillion_energy_facility	L100000401550	G100000402251	US26441C2044	0.625	696		24	2040	2080	2120	54.375	54.375	54.375	54.375	54.375	54.375	54.375	54.375	54.375	54.375	54.375	54.375
oil/gas	United States	Americas	Northern America	Vermillion energy facility	CT6			87	operating	2000		GT	NG					Duke Energy Indiana LLC [62.5%]; Wabash Valley Power Association Inc [37.5%]	Duke Energy Corp [62.5%]	39.9223	-87.4464	exact	Cayuga	Vermillion		Indiana	https://www.gem.wiki/Vermillion_energy_facility	L100000401550	G100000402252	US26441C2044	0.625	696		24	2040	2080	2120	54.375	54.375	54.375	54.375	54.375	54.375	54.375	54.375	54.375	54.375	54.375	54.375
oil/gas	United States	Americas	Northern America	Vermillion energy facility	CT7			87	operating	2000		GT	NG					Duke Energy Indiana LLC [62.5%]; Wabash Valley Power Association Inc [37.5%]	Duke Energy Corp [62.5%]	39.9223	-87.4464	exact	Cayuga	Vermillion		Indiana	https://www.gem.wiki/Vermillion_energy_facility	L100000401550	G100000402253	US26441C2044	0.625	696		24	2040	2080	2120	54.375	54.375	54.375	54.375	54.375	54.375	54.375	54.375	54.375	54.375	54.375	54.375
oil/gas	United States	Americas	Northern America	Vermillion energy facility	CT8			87	operating	2000		GT	NG					Duke Energy Indiana LLC [62.5%]; Wabash Valley Power Association Inc [37.5%]	Duke Energy Corp [62.5%]	39.9223	-87.4464	exact	Cayuga	Vermillion		Indiana	https://www.gem.wiki/Vermillion_energy_facility	L100000401550	G100000402254	US26441C2044	0.625	696	696	24	2040	2080	2120	54.375	54.375	54.375	54.375	54.375	54.375	54.375	54.375	54.375	54.375	54.375	54.375
oil/gas	United States	Americas	Northern America	W.S. Lee Steam Station	3			163	retired	1958	2022	ST	NG					Duke Energy Carolinas LLC [100.0%]	Duke Energy Corp [100.0%]	34.6022	-82.435	exact	Williamston	Anderson		South Carolina	https://www.gem.wiki/W.S._Lee_Steam_Station	L100000104179	G100000402732	US26441C2044	1	1118		66	1998	2038	2078	163	163	163	163	163	163	163	163	163	163	163	163
oil/gas	United States	Americas	Northern America	W.S. Lee Steam Station	7			54	operating	2007		GT	NG/FO					Duke Energy Carolinas LLC [100.0%]	Duke Energy Corp [100.0%]	34.6022	-82.435	exact	Williamston	Anderson		South Carolina	https://www.gem.wiki/W.S._Lee_Steam_Station	L100000104179	G100000402733	US26441C2044	1	1118		17	2047	2087	2127	54	54	54	54	54	54	54	54	54	54	54	54
oil/gas	United States	Americas	Northern America	W.S. Lee Steam Station	8			54	operating	2007		GT	NG/FO					Duke Energy Carolinas LLC [100.0%]	Duke Energy Corp [100.0%]	34.6022	-82.435	exact	Williamston	Anderson		South Carolina	https://www.gem.wiki/W.S._Lee_Steam_Station	L100000104179	G100000402734	US26441C2044	1	1118		17	2047	2087	2127	54	54	54	54	54	54	54	54	54	54	54	54
oil/gas	United States	Americas	Northern America	W.S. Lee Steam Station	CC1			847	operating	2018		CC	NG					Duke Energy Carolinas LLC [100.0%]	Duke Energy Corp [100.0%]	34.6022	-82.435	exact	Williamston	Anderson		South Carolina	https://www.gem.wiki/W.S._Lee_Steam_Station	L100000104179	G100000401663	US26441C2044	1	1118	1118	6	2058	2098	2138	847	847	847	847	847	847	847	847	847	847	847	847
oil/gas	United States	Americas	Northern America	Wayne County power station	1			195	operating	2000		GT	NG/FO					Duke Energy Progress LLC [100.0%]	Duke Energy Corp [100.0%]	35.3758	-78.0981	exact	Goldsboro	Wayne		North Carolina	https://www.gem.wiki/Wayne_County_power_station	L100000401886	G100000402788	US26441C2044	1	979		24	2040	2080	2120	195	195	195	195	195	195	195	195	195	195	195	195
oil/gas	United States	Americas	Northern America	Wayne County power station	2			195	operating	2000		GT	NG/FO					Duke Energy Progress LLC [100.0%]	Duke Energy Corp [100.0%]	35.3758	-78.0981	exact	Goldsboro	Wayne		North Carolina	https://www.gem.wiki/Wayne_County_power_station	L100000401886	G100000402789	US26441C2044	1	979		24	2040	2080	2120	195	195	195	195	195	195	195	195	195	195	195	195
oil/gas	United States	Americas	Northern America	Wayne County power station	3			195	operating	2000		GT	NG/FO					Duke Energy Progress LLC [100.0%]	Duke Energy Corp [100.0%]	35.3758	-78.0981	exact	Goldsboro	Wayne		North Carolina	https://www.gem.wiki/Wayne_County_power_station	L100000401886	G100000402790	US26441C2044	1	979		24	2040	2080	2120	195	195	195	195	195	195	195	195	195	195	195	195
oil/gas	United States	Americas	Northern America	Wayne County power station	4			195	operating	2000		GT	NG/FO					Duke Energy Progress LLC [100.0%]	Duke Energy Corp [100.0%]	35.3758	-78.0981	exact	Goldsboro	Wayne		North Carolina	https://www.gem.wiki/Wayne_County_power_station	L100000401886	G100000402791	US26441C2044	1	979		24	2040	2080	2120	195	195	195	195	195	195	195	195	195	195	195	195
oil/gas	United States	Americas	Northern America	Wayne County power station	5			199	operating	2009		GT	NG/FO					Duke Energy Progress LLC [100.0%]	Duke Energy Corp [100.0%]	35.3758	-78.0981	exact	Goldsboro	Wayne		North Carolina	https://www.gem.wiki/Wayne_County_power_station	L100000401886	G100000402792	US26441C2044	1	979	979	15	2049	2089	2129	199	199	199	199	199	199	199	199	199	199	199	199
oil/gas	United States	Americas	Northern America	Wheatland generating facility	CTG1			125	operating	2000		GT	NG					Duke Energy Indiana LLC [100.0%]	Duke Energy Corp [100.0%]	38.6716	-87.2931	exact	Wheatland	Knox		Indiana	https://www.gem.wiki/Wheatland_generating_facility	L100000401879	G100000402764	US26441C2044	1	500		24	2040	2080	2120	125	125	125	125	125	125	125	125	125	125	125	125
oil/gas	United States	Americas	Northern America	Wheatland generating facility	CTG2			125	operating	2000		GT	NG					Duke Energy Indiana LLC [100.0%]	Duke Energy Corp [100.0%]	38.6716	-87.2931	exact	Wheatland	Knox		Indiana	https://www.gem.wiki/Wheatland_generating_facility	L100000401879	G100000402765	US26441C2044	1	500		24	2040	2080	2120	125	125	125	125	125	125	125	125	125	125	125	125
oil/gas	United States	Americas	Northern America	Wheatland generating facility	CTG3			125	operating	2000		GT	NG					Duke Energy Indiana LLC [100.0%]	Duke Energy Corp [100.0%]	38.6716	-87.2931	exact	Wheatland	Knox		Indiana	https://www.gem.wiki/Wheatland_generating_facility	L100000401879	G100000402766	US26441C2044	1	500		24	2040	2080	2120	125	125	125	125	125	125	125	125	125	125	125	125
oil/gas	United States	Americas	Northern America	Wheatland generating facility	CTG4			125	operating	2000		GT	NG					Duke Energy Indiana LLC [100.0%]	Duke Energy Corp [100.0%]	38.6716	-87.2931	exact	Wheatland	Knox		Indiana	https://www.gem.wiki/Wheatland_generating_facility	L100000401879	G100000402767	US26441C2044	1	500	500	24	2040	2080	2120	125	125	125	125	125	125	125	125	125	125	125	125
oil/gas	United States	Americas	Northern America	Woodsdale power station	GT2			95	operating	1992		GT	NG/FO					Duke Energy Kentucky Inc [100.0%]	Duke Energy Corp [100.0%]	39.4492	-84.4611	exact	Trenton	Butler		Ohio	https://www.gem.wiki/Woodsdale_power_station	L100000401880	G100000402769	US26441C2044	1	570		32	2032	2072	2112	95	95	95	95	95	95	95	95	95	95	95	95
oil/gas	United States	Americas	Northern America	Woodsdale power station	GT3			95	operating	1992		GT	NG/FO					Duke Energy Kentucky Inc [100.0%]	Duke Energy Corp [100.0%]	39.4492	-84.4611	exact	Trenton	Butler		Ohio	https://www.gem.wiki/Woodsdale_power_station	L100000401880	G100000402770	US26441C2044	1	570		32	2032	2072	2112	95	95	95	95	95	95	95	95	95	95	95	95
oil/gas	United States	Americas	Northern America	Woodsdale power station	GT4			95	operating	1992		GT	NG/FO					Duke Energy Kentucky Inc [100.0%]	Duke Energy Corp [100.0%]	39.4492	-84.4611	exact	Trenton	Butler		Ohio	https://www.gem.wiki/Woodsdale_power_station	L100000401880	G100000402771	US26441C2044	1	570		32	2032	2072	2112	95	95	95	95	95	95	95	95	95	95	95	95
oil/gas	United States	Americas	Northern America	Woodsdale power station	GT5			95	operating	1992		GT	NG/FO					Duke Energy Kentucky Inc [100.0%]	Duke Energy Corp [100.0%]	39.4492	-84.4611	exact	Trenton	Butler		Ohio	https://www.gem.wiki/Woodsdale_power_station	L100000401880	G100000402772	US26441C2044	1	570		32	2032	2072	2112	95	95	95	95	95	95	95	95	95	95	95	95
oil/gas	United States	Americas	Northern America	Woodsdale power station	GT6			95	operating	1992		GT	NG/FO					Duke Energy Kentucky Inc [100.0%]	Duke Energy Corp [100.0%]	39.4492	-84.4611	exact	Trenton	Butler		Ohio	https://www.gem.wiki/Woodsdale_power_station	L100000401880	G100000402773	US26441C2044	1	570		32	2032	2072	2112	95	95	95	95	95	95	95	95	95	95	95	95
oil/gas	United States	Americas	Northern America	Woodsdale power station	GT1			95	operating	1993		GT	NG/FO					Duke Energy Kentucky Inc [100.0%]	Duke Energy Corp [100.0%]	39.4492	-84.4611	exact	Trenton	Butler		Ohio	https://www.gem.wiki/Woodsdale_power_station	L100000401880	G100000402768	US26441C2044	1	570	570	31	2033	2073	2113	95	95	95	95	95	95	95	95	95	95	95	95
hydropower	United States	Americas	Northern America	Bad Creek hydroelectric plant				1488	operating	1991		pumped storage				TRUE	FALSE	Duke Energy Carolinas LLC		35.0075	-82.9975	exact	Salem	Oconee County		South Carolina	https://gem.wiki/Bad_Creek_hydroelectric_plant	L603716	G603754	US26441C2044	1	1488	1488	33	2031	2071	2111	1488	1488	1488	1488	1488	1488	1488	1488	1488	1488	1488	1488
hydropower	United States	Americas	Northern America	Cowans Ford hydroelectric plant				350	operating	1963		run-of-river				TRUE	FALSE	Duke Energy Carolinas LLC		35.4346	-80.9588	exact	Stanley	Lincoln County		North Carolina	https://gem.wiki/Cowans_Ford_hydroelectric_plant	L603771	G603809	US26441C2044	1	350	350	61	2003	2043	2083	350	350	350	350	350	350	350	350	350	350	350	350
hydropower	United States	Americas	Northern America	Jocassee hydroelectric plant				774	operating	1973		pumped storage				TRUE	FALSE	Duke Energy Carolinas LLC		34.9594	-82.9147	exact	Salem	Pickens County		South Carolina	https://gem.wiki/Jocassee_hydroelectric_plant	L603831	G603869	US26441C2044	1	774	774	51	2013	2053	2093	774	774	774	774	774	774	774	774	774	774	774	774
hydropower	United States	Americas	Northern America	Keowee hydroelectric plant				158	operating	1971		conventional storage				TRUE	FALSE	Duke Energy Carolinas LLC		34.7981	-82.8872	exact	Seneca	Pickens County		South Carolina	https://gem.wiki/Keowee_hydroelectric_plant	L603841	G603879	US26441C2044	1	158	158	53	2011	2051	2091	158	158	158	158	158	158	158	158	158	158	158	158
hydropower	United States	Americas	Northern America	Markland hydroelectric plant				78	operating	1967		run-of-river				TRUE	FALSE	Duke Energy Indiana LLC		38.7795	-84.964	exact	Florence	Switzerland County		Indiana	https://gem.wiki/Markland_hydroelectric_plant	L603860	G603898	US26441C2044	1	78	78	57	2007	2047	2087	78	78	78	78	78	78	78	78	78	78	78	78
hydropower	United States	Americas	Northern America	Tillery hydroelectric plant				84	operating	1928		conventional storage				TRUE	FALSE	Duke Energy Progress (NC)		35.2067	-80.0648	exact	Mount Gilead	Montgomery County		North Carolina	https://gem.wiki/Tillery_hydroelectric_plant	L603946	G603984	US26441C2044	1	84	84	96	1968	2008	2048	84	84	84	84	84	84	84	84	84	84	84	84
hydropower	United States	Americas	Northern America	Walters hydroelectric plant				108	operating	1930		conventional storage				TRUE	FALSE	Duke Energy Progress (NC)		35.6946	-83.0503	exact	Waterville	Haywood County		North Carolina	https://gem.wiki/Walters_hydroelectric_plant	L603955	G603993	US26441C2044	1	108	108	94	1970	2010	2050	108	108	108	108	108	108	108	108	108	108	108	108
hydropower	United States	Americas	Northern America	Wateree hydroelectric plant				91	operating	1919		run-of-river				TRUE	FALSE	Duke Energy Carolinas LLC		34.3355	-80.7021	exact	Ridgeway	Kershaw County		South Carolina	https://gem.wiki/Wateree_hydroelectric_plant	L603957	G603995	US26441C2044	1	91	91	105	1959	1999	2039	91	91	91	91	91	91	91	91	91	91	91	91
nuclear	United States	Americas	Northern America	McGuire nuclear power plant	1			1215	operating	1981		pressurized water reactor						Duke Energy CORP		35.4331	-80.9486	exact		Mecklenburg County		North Carolina	https://gem.wiki/McGuire_nuclear_power_plant	L500068	G500117	US26441C2044	1	2430		43	2021	2061	2101	1215	1215	1215	1215	1215	1215	1215	1215	1215	1215	1215	1215
nuclear	United States	Americas	Northern America	McGuire nuclear power plant	2			1215	operating	1984		pressurized water reactor						Duke Energy CORP		35.4331	-80.9486	exact		Mecklenburg County		North Carolina	https://gem.wiki/McGuire_nuclear_power_plant	L500068	G500118	US26441C2044	1	2430	2430	40	2024	2064	2104	1215	1215	1215	1215	1215	1215	1215	1215	1215	1215	1215	1215
nuclear	United States	Americas	Northern America	Oconee nuclear power plant	1			891	operating	1973		pressurized water reactor						Duke Energy CORP		34.7939	-82.8986	exact		Oconee County		South Carolina	https://gem.wiki/Oconee_nuclear_power_plant	L500152	G500348	US26441C2044	1	2682		51	2013	2053	2093	891	891	891	891	891	891	891	891	891	891	891	891
nuclear	United States	Americas	Northern America	Oconee nuclear power plant	2			891	operating	1974		pressurized water reactor						Duke Energy CORP		34.7939	-82.8986	exact		Oconee County		South Carolina	https://gem.wiki/Oconee_nuclear_power_plant	L500152	G500349	US26441C2044	1	2682		50	2014	2054	2094	891	891	891	891	891	891	891	891	891	891	891	891
nuclear	United States	Americas	Northern America	Oconee nuclear power plant	3			900	operating	1974		pressurized water reactor						Duke Energy CORP		34.7939	-82.8986	exact		Oconee County		South Carolina	https://gem.wiki/Oconee_nuclear_power_plant	L500152	G500347	US26441C2044	1	2682	2682	50	2014	2054	2094	900	900	900	900	900	900	900	900	900	900	900	900
solar	United States	Americas	Northern America	Bay Ranch Solar Power Plant				75	operating	2023		PV						Duke Energy CORP		30.1648	-85.4918	exact		Bay County		Florida	https://gem.wiki/Bay_Ranch_Solar_Power_Plant	L808387	G810578	US26441C2044	1	75		1	2063	2103	2143	0	0	0	75	75	75	75	75	75	75	75	75
solar	United States	Americas	Northern America	Bay Trail Solar Power Plant				75	operating	2022		PV						Duke Energy CORP		28.9999	-82.6722	exact	Crystal River	Citrus County		Florida	https://gem.wiki/Bay_Trail_Solar_Power_Plant	L804382	G805035	US26441C2044	1	75	75	2	2062	2102	2142	0	0	75	75	75	75	75	75	75	75	75	75
solar	United States	Americas	Northern America	Broad River Solar				50	operating	2021		PV						Duke Energy CORP		35.188	-81.751	exact	Mooresboro	Cleveland County		North Carolina	https://gem.wiki/Broad_River_Solar	L804383	G805036	US26441C2044	1	50	50	3	2061	2101	2141	0	50	50	50	50	50	50	50	50	50	50	50
solar	United States	Americas	Northern America	Capital Partners Solar Project			Pasquotank solar farm	20	operating	2014		PV						Duke Energy CORP		36.272	-76.308	exact		Pasquotank County		North Carolina	https://gem.wiki/Capital_Partners_Solar_Project	L804384	G805037	US26441C2044	1	20	20	10	2054	2094	2134	20	20	20	20	20	20	20	20	20	20	20	20
solar	United States	Americas	Northern America	Caprock Solar	1			25	operating	2016		PV						Duke Energy CORP		34.984	-103.623	exact		Quay County		New Mexico	https://gem.wiki/Caprock_Solar	L805002	G805769	US26441C2044	1	25	25	8	2056	2096	2136	25	25	25	25	25	25	25	25	25	25	25	25
solar	United States	Americas	Northern America	Charlie Creek Solar Power Plant				75	operating	2022		PV						Duke Energy CORP		27.6398	-81.6544	exact	Wauchula	Hardee County		Florida	https://gem.wiki/Charlie_Creek_Solar_Power_Plant	L804385	G805038	US26441C2044	1	75		2	2062	2102	2142	0	0	75	75	75	75	75	75	75	75	75	75
solar	United States	Americas	Northern America	Columbia (Duke Energy) Solar Power Plant				75	operating	2020		PV						Duke Energy CORP		29.8826	-82.6962	exact		Columbia County		Florida	https://gem.wiki/Columbia_(Duke_Energy)_Solar_Power_Plant	L804386	G805039	US26441C2044	1	75	75	4	2060	2100	2140	75	75	75	75	75	75	75	75	75	75	75	75
solar	United States	Americas	Northern America	Conetoe II Solar			Conetoe solar farm	80	operating	2015		PV						Duke Energy CORP		35.822	-77.481	exact		Edgecombe County		North Carolina	https://gem.wiki/Conetoe_II_Solar	L804288	G804916	US26441C2044	1	80	80	9	2055	2095	2135	80	80	80	80	80	80	80	80	80	80	80	80
solar	United States	Americas	Northern America	Debary Solar Power Plant				74	operating	2020		PV						Duke Energy CORP		28.8995	-81.3309	exact		Volusia County		Florida	https://gem.wiki/Debary_Solar_Power_Plant	L804387	G805040	US26441C2044	1	74	74	4	2060	2100	2140	74	74	74	74	74	74	74	74	74	74	74	74
solar	United States	Americas	Northern America	Dogwood Solar				20	operating	2014		PV						Duke Energy CORP		36.121	-77.404	exact		Halifax County		North Carolina	https://gem.wiki/Dogwood_Solar	L805003	G805770	US26441C2044	1	20	20	10	2054	2094	2134	20	20	20	20	20	20	20	20	20	20	20	20
solar	United States	Americas	Northern America	Duette Solar Power Plant				74	operating	2021		PV						Duke Energy CORP		27.5858	-82.062	exact	Parrish	Manatee County		Florida	https://gem.wiki/Duette_Solar_Power_Plant	L804388	G805041	US26441C2044	1	74	74	3	2061	2101	2141	0	74	74	74	74	74	74	74	74	74	74	74
solar	United States	Americas	Northern America	East Blackland Solar Project 1			Pflugerville solar park	144	operating	2021		PV						Duke Energy CORP		30.4214	-97.4614	exact	Manor	Travis County		Texas	https://gem.wiki/East_Blackland_Solar_Project_1	L805004	G805771	US26441C2044	1	144	144	3	2061	2101	2141	0	144	144	144	144	144	144	144	144	144	144	144
solar	United States	Americas	Northern America	Elm City Solar Facility				40	operating	2016		PV						Duke Energy CORP		35.7811	-77.8469	exact		Wilson County		North Carolina	https://gem.wiki/Elm_City_Solar_Facility	L804389	G805042	US26441C2044	1	40	40	8	2056	2096	2136	40	40	40	40	40	40	40	40	40	40	40	40
solar	United States	Americas	Northern America	Fayetteville Solar			DD Fayetteville Solar NC	23	operating	2015		PV						Duke Energy CORP		34.8344	-78.8436	exact		Bladen County		North Carolina	https://gem.wiki/Fayetteville_Solar	L804390	G805043	US26441C2044	1	23	23	9	2055	2095	2135	23	23	23	23	23	23	23	23	23	23	23	23
solar	United States	Americas	Northern America	Fort Green Solar Power Plant				75	operating	2022		PV						Duke Energy CORP		27.6411	-81.9416	exact	Bowling Green	Hardee County		Florida	https://gem.wiki/Fort_Green_Solar_Power_Plant	L804391	G805044	US26441C2044	1	75	75	2	2062	2102	2142	0	0	75	75	75	75	75	75	75	75	75	75
solar	United States	Americas	Northern America	Gaston Solar Power Plant				25	operating	2020		PV						Duke Energy CORP		35.322	-81.342	approximate		Gaston County		North Carolina	https://gem.wiki/Gaston_Solar_Power_Plant	L804392	G805045	US26441C2044	1	25	25	4	2060	2100	2140	25	25	25	25	25	25	25	25	25	25	25	25
solar	United States	Americas	Northern America	Halifax solar farm				20	operating	2014		PV						Duke Energy CORP		36.4419	-77.7114	exact		Halifax County		North Carolina	https://gem.wiki/Halifax_solar_farm	L804393	G805046	US26441C2044	1	20	20	10	2054	2094	2134	20	20	20	20	20	20	20	20	20	20	20	20
solar	United States	Americas	Northern America	Hamilton Solar Power Plant				75	operating	2018		PV						Duke Energy CORP		30.4443	-83.1869	exact		Hamilton County		Florida	https://gem.wiki/Hamilton_Solar_Power_Plant	L804394	G805047	US26441C2044	1	75		6	2058	2098	2138	75	75	75	75	75	75	75	75	75	75	75	75
solar	United States	Americas	Northern America	Hardeetown Solar Power Plant				75	operating	2023		PV						Duke Energy CORP		29.4856	-82.8435	approximate		Levy County		Florida	https://gem.wiki/Hardeetown_Solar_Power_Plant	L808442	G810664	US26441C2044	1	75		1	2063	2103	2143	0	0	0	75	75	75	75	75	75	75	75	75
solar	United States	Americas	Northern America	High Springs Solar Power Plant				75	operating	2023		PV						Duke Energy CORP		29.8101	-82.6398	approximate		Alachua County		Florida	https://gem.wiki/High_Springs_Solar_Power_Plant	L808448	G810671	US26441C2044	1	75		1	2063	2103	2143	0	0	0	75	75	75	75	75	75	75	75	75
solar	United States	Americas	Northern America	Hildreth Solar Power Plant				75	operating	2023		PV						Duke Energy CORP		29.9648	-82.8232	approximate		Suwannee County		Florida	https://gem.wiki/Hildreth_Solar_Power_Plant	L808450	G810673	US26441C2044	1	75	75	1	2063	2103	2143	0	0	0	75	75	75	75	75	75	75	75	75
solar	United States	Americas	Northern America	Holstein 1 (Duke) solar farm				200	operating	2020		PV						Duke Energy CORP		32.1041	-100.162	exact		Nolan County		Texas	https://gem.wiki/Holstein_1_(Duke)_solar_farm	L804173	G804775	US26441C2044	1	200	200	4	2060	2100	2140	200	200	200	200	200	200	200	200	200	200	200	200
solar	United States	Americas	Northern America	Hoosier Jack Solar				175	announced	2024		PV						Duke Energy CORP		39.2681	-87.3244	approximate		Vigo County		Indiana	https://gem.wiki/Hoosier_Jack_Solar	L808453	G810677	US26441C2044	1	175	175	0	2064	2104	2144	0	0	0	0	175	175	175	175	175	175	175	175
solar	United States	Americas	Northern America	Jackpot Solar			Twin Falls South	120	operating	2022		PV						Duke Energy CORP		42.2042	-114.61	exact	Twin Falls			Idaho	https://gem.wiki/Jackpot_Solar	L805130	G805909	US26441C2044	1	120	120	2	2062	2102	2142	0	0	120	120	120	120	120	120	120	120	120	120
solar	United States	Americas	Northern America	Kelford solar farm			Capital Partners Solar Project 2	20	operating	2015		PV						Duke Energy CORP		36.155	-77.208	exact		Bertie County		North Carolina	https://gem.wiki/Kelford_solar_farm	L804395	G805048	US26441C2044	1	20	20	9	2055	2095	2135	20	20	20	20	20	20	20	20	20	20	20	20
solar	United States	Americas	Northern America	Lake Placid Solar Power Plant				45	operating	2019		PV						Duke Energy CORP		27.3311	-81.364	exact		Highlands County		Florida	https://gem.wiki/Lake_Placid_Solar_Power_Plant	L804396	G805049	US26441C2044	1	45	45	5	2059	2099	2139	45	45	45	45	45	45	45	45	45	45	45	45
solar	United States	Americas	Northern America	Lapetus solar farm				100	operating	2019		PV						Duke Energy CORP		32.4601	-102.673	exact		Andrews County		Texas	https://gem.wiki/Lapetus_solar_farm	L804397	G805050	US26441C2044	1	100	100	5	2059	2099	2139	100	100	100	100	100	100	100	100	100	100	100	100
solar	United States	Americas	Northern America	Longboat Solar				20	operating	2016		PV						Duke Energy CORP		34.905	-117.104	exact		San Bernardino County		California	https://gem.wiki/Longboat_Solar	L805008	G805775	US26441C2044	1	20	20	8	2056	2096	2136	20	20	20	20	20	20	20	20	20	20	20	20
solar	United States	Americas	Northern America	Maiden Creek Solar Power Plant				69	operating	2021		PV						Duke Energy CORP		35.593	-81.167	exact	Maiden	Catawba County		North Carolina	https://gem.wiki/Maiden_Creek_Solar_Power_Plant	L804398	G805051	US26441C2044	1	69	69	3	2061	2101	2141	0	69	69	69	69	69	69	69	69	69	69	69
solar	United States	Americas	Northern America	Monroe Solar Facility				55	operating	2017		PV						Duke Energy CORP		34.9299	-80.6256	exact	Monroe	Union County		North Carolina	https://gem.wiki/Monroe_Solar_Facility	L804399	G805052	US26441C2044	1	55	55	7	2057	2097	2137	55	55	55	55	55	55	55	55	55	55	55	55
solar	United States	Americas	Northern America	Mule Creek solar farm			Mule Creek Renewable Energy Center	75	pre-construction	2024		PV						Duke Energy CORP		30.1105	-85.3976	approximate		Bay County		Florida	https://gem.wiki/Mule_Creek_solar_farm	L808479	G810707	US26441C2044	1	75	75	0	2064	2104	2144	0	0	0	0	75	75	75	75	75	75	75	75
solar	United States	Americas	Northern America	North Rosamond Solar				151	operating	2019		PV						Duke Energy CORP		34.862	-118.38	exact		Kern County		California	https://gem.wiki/North_Rosamond_Solar	L804400	G805053	US26441C2044	1	151	151	5	2059	2099	2139	151	151	151	151	151	151	151	151	151	151	151	151
solar	United States	Americas	Northern America	Palmer Solar				60	operating	2020		PV						Duke Energy CORP		38.6299	-104.653	exact		El Paso County		Colorado	https://gem.wiki/Palmer_Solar	L805009	G805776	US26441C2044	1	60	60	4	2060	2100	2140	60	60	60	60	60	60	60	60	60	60	60	60
solar	United States	Americas	Northern America	Pike Solar Project				175	pre-construction	2023		PV						Duke Energy CORP		38.6217	-104.581	approximate	Fountain	El Paso County		Colorado	https://gem.wiki/Pike_Solar_Project	L805132	G805911	US26441C2044	1	175	175	1	2063	2103	2143	0	0	0	175	175	175	175	175	175	175	175	175
solar	United States	Americas	Northern America	Pinson solar farm				20	operating	2022		PV						Duke Energy CORP		34.7201	-82.06	exact	Woodruff	Spartanburg County		South Carolina	https://gem.wiki/Pinson_solar_farm	L805408	G806239	US26441C2044	1	20	20	2	2062	2102	2142	0	0	20	20	20	20	20	20	20	20	20	20
solar	United States	Americas	Northern America	Pisgah Ridge Solar				250	operating	2022		PV						Duke Energy CORP		31.8965	-96.4671	exact		Navarro County		Texas	https://gem.wiki/Pisgah_Ridge_Solar	L808498	G810726	US26441C2044	1	250	250	2	2062	2102	2142	0	0	250	250	250	250	250	250	250	250	250	250
solar	United States	Americas	Northern America	Pumpjack Solar I				20	operating	2015		PV						Duke Energy CORP		35.3056	-119.623	exact		Kern County		California	https://gem.wiki/Pumpjack_Solar_I	L804401	G805054	US26441C2044	1	20	20	9	2055	2095	2135	20	20	20	20	20	20	20	20	20	20	20	20
solar	United States	Americas	Northern America	Rambler solar farm				200	operating	2020		PV						Duke Energy CORP		31.517	-100.6	exact		Tom Green County		Texas	https://gem.wiki/Rambler_solar_farm	L804402	G805055	US26441C2044	1	200	200	4	2060	2100	2140	200	200	200	200	200	200	200	200	200	200	200	200
solar	United States	Americas	Northern America	Rattler Solar Power Plant				75	shelved			PV						Duke Energy CORP		28.5553	-82.3879	approximate		Brooksville County		Florida	https://gem.wiki/Rattler_Solar_Power_Plant	L805010	G805777	US26441C2044	1	75	75	-99	40	80	120	0	0	0	0	0	0	0	0	0	0	0	0
solar	United States	Americas	Northern America	Rio Bravo Solar	1			20	operating	2016		PV						Duke Energy CORP		35.416	-119.63	exact		Kern County		California	https://gem.wiki/Rio_Bravo_Solar	L805011	G805778	US26441C2044	1	40		8	2056	2096	2136	20	20	20	20	20	20	20	20	20	20	20	20
solar	United States	Americas	Northern America	Rio Bravo Solar	2			20	operating	2016		PV						Duke Energy CORP		35.4225	-119.629	exact		Kern County		California	https://gem.wiki/Rio_Bravo_Solar	L805011	G805779	US26441C2044	1	40	40	8	2056	2096	2136	20	20	20	20	20	20	20	20	20	20	20	20
solar	United States	Americas	Northern America	Sandy Creek Solar Power Plant				75	operating	2022		PV						Duke Energy CORP		30.1031	-85.4104	exact	Panama City	Bay County		Florida	https://gem.wiki/Sandy_Creek_Solar_Power_Plant	L804403	G805056	US26441C2044	1	75		2	2062	2102	2142	0	0	75	75	75	75	75	75	75	75	75	75
solar	United States	Americas	Northern America	Santa Fe Solar Power Plant				75	operating	2021		PV						Duke Energy CORP		29.871	-82.723	exact	Archer	Alachua County		Florida	https://gem.wiki/Santa_Fe_Solar_Power_Plant	L804404	G805057	US26441C2044	1	75	75	3	2061	2101	2141	0	75	75	75	75	75	75	75	75	75	75	75
solar	United States	Americas	Northern America	Seville solar farm	1			20	operating	2015		PV						Duke Energy CORP		33.1125	-116.014	exact		Imperial County		California	https://gem.wiki/Seville_solar_farm	L805012	G805780	US26441C2044	1	50		9	2055	2095	2135	20	20	20	20	20	20	20	20	20	20	20	20
solar	United States	Americas	Northern America	Seville solar farm	2			30	operating	2015		PV						Duke Energy CORP		33.1101	-116.006	exact		Imperial County		California	https://gem.wiki/Seville_solar_farm	L805012	G805781	US26441C2044	1	50	50	9	2055	2095	2135	30	30	30	30	30	30	30	30	30	30	30	30
solar	United States	Americas	Northern America	Shawboro solar farm				20	operating	2015		PV						Duke Energy CORP		36.4333	-76.0872	exact		Camden County		North Carolina	https://gem.wiki/Shawboro_solar_farm	L805013	G805782	US26441C2044	1	20	20	9	2055	2095	2135	20	20	20	20	20	20	20	20	20	20	20	20
solar	United States	Americas	Northern America	Shoreham Solar Commons				25	operating	2018		PV						Duke Energy CORP		40.9344	-72.8885	exact		Suffolk County		New York	https://gem.wiki/Shoreham_Solar_Commons	L804405	G805058	US26441C2044	1	25	25	6	2058	2098	2138	25	25	25	25	25	25	25	25	25	25	25	25
solar	United States	Americas	Northern America	South Dixon Solar				500	shelved			PV						Duke Energy CORP		41.7817	-89.5012	exact		Lee County		Illinois	https://gem.wiki/South_Dixon_Solar	L804406	G805059	US26441C2044	1	500	500	-99	40	80	120	0	0	0	0	0	0	0	0	0	0	0	0
solar	United States	Americas	Northern America	Speedway (North Carolina) Solar				23	operating	2021		PV						Duke Energy CORP		35.218	-80.536	exact	Midland	Cabarrus County		North Carolina	https://gem.wiki/Speedway_(North_Carolina)_Solar	L804407	G805060	US26441C2044	1	23		3	2061	2101	2141	0	23	23	23	23	23	23	23	23	23	23	23
solar	United States	Americas	Northern America	Stony Knoll Solar				23	operating	2022		PV						Duke Energy CORP		36.288	-80.656	exact	Rockford	Surry County		North Carolina	https://gem.wiki/Stony_Knoll_Solar	L804408	G805061	US26441C2044	1	23	23	2	2062	2102	2142	0	0	23	23	23	23	23	23	23	23	23	23
solar	United States	Americas	Northern America	Tomlin Mill Road solar farm				35	shelved			PV						Duke Energy CORP		35.9569	-80.7714	approximate	Chalotte	Iredell County		North Carolina	https://gem.wiki/Tomlin_Mill_Road_solar_farm	L805014	G805783	US26441C2044	1	35	35	-99	40	80	120	0	0	0	0	0	0	0	0	0	0	0	0
solar	United States	Americas	Northern America	Trenton Solar Power Plant				75	operating	2019		PV						Duke Energy CORP		29.6351	-82.8431	exact		Gilchrist County		Florida	https://gem.wiki/Trenton_Solar_Power_Plant	L804409	G805062	US26441C2044	1	75		5	2059	2099	2139	75	75	75	75	75	75	75	75	75	75	75	75
solar	United States	Americas	Northern America	Twin Rivers Solar Power Plant				75	operating	2021		PV						Duke Energy CORP		30.4664	-82.9687	exact	Jasper	Hamilton County		Florida	https://gem.wiki/Twin_Rivers_Solar_Power_Plant	L804410	G805063	US26441C2044	1	75	75	3	2061	2101	2141	0	75	75	75	75	75	75	75	75	75	75	75
solar	United States	Americas	Northern America	Warsaw Farm solar farm				65	operating	2015		PV						Duke Energy CORP		35.0056	-78.1258	exact		Duplin County		North Carolina	https://gem.wiki/Warsaw_Farm_solar_farm	L804411	G805064	US26441C2044	1	65	65	9	2055	2095	2135	65	65	65	65	65	65	65	65	65	65	65	65
solar	United States	Americas	Northern America	Wewahitchka solar farm				75	shelved			PV						Duke Energy CORP		29.9983	-85.3688	approximate		Overstreet County		Florida	https://gem.wiki/Wewahitchka_solar_farm	L805005	G805772	US26441C2044	1	75	75	-99	40	80	120	0	0	0	0	0	0	0	0	0	0	0	0
solar	United States	Americas	Northern America	Wildflower (Mississippi) Solar				100	construction	2023		PV						Duke Energy CORP		34.962	-90.184	exact		DeSoto County		Mississippi	https://gem.wiki/Wildflower_(Mississippi)_Solar	L833398	G839127	US26441C2044	1	100	100	1	2063	2103	2143	0	0	0	100	100	100	100	100	100	100	100	100
solar	United States	Americas	Northern America	Winquepin solar farm			Winquepin Renewable Energy Center	75	pre-construction	2024		PV						Duke Energy CORP		30.2825	-83.2982	approximate		Madison County		Florida	https://gem.wiki/Winquepin_solar_farm	L833405	G839135	US26441C2044	1	75	75	0	2064	2104	2144	0	0	0	0	75	75	75	75	75	75	75	75
solar	United States	Americas	Northern America	Wolf Pit Branch Solar				62	construction	2023		PV						Duke Energy CORP		33.741	-81.4	exact		Lexington County		South Carolina	https://gem.wiki/Wolf_Pit_Branch_Solar	L808557	G810802	US26441C2044	1	62	62	1	2063	2103	2143	0	0	0	62	62	62	62	62	62	62	62	62
wind	United States	Americas	Northern America	Campbell Hill wind farm	1			99	operating	2009		onshore						Duke Energy CORP		42.9993	-106.021	exact		Converse County		Wyoming	https://gem.wiki/Campbell_Hill_wind_farm	L906947	G909351	US26441C2044	1	99	99	15	2049	2089	2129	99	99	99	99	99	99	99	99	99	99	99	99
wind	United States	Americas	Northern America	Cimarron II wind farm	1			131	operating	2012		onshore						Duke Energy CORP [50%]; Sumitomo Corporation of Americas [50%]		37.8727	-100.403	exact		Gray County		Kansas	https://gem.wiki/Cimarron_II_wind_farm	L907136	G909610	US26441C2044	0.5	131	131	12	2052	2092	2132	65.5	65.5	65.5	65.5	65.5	65.5	65.5	65.5	65.5	65.5	65.5	65.5
wind	United States	Americas	Northern America	Frontier wind farm	1			200	operating	2016		onshore						Duke Energy CORP		36.8357	-97.2494	exact		Kay County		Oklahoma	https://gem.wiki/Frontier_wind_farm	L907349	G909901	US26441C2044	1	552		8	2056	2096	2136	200	200	200	200	200	200	200	200	200	200	200	200
wind	United States	Americas	Northern America	Frontier wind farm	2			352	operating	2021		onshore						Duke Energy CORP		36.8271	-97.0289	exact		Kay County		Oklahoma	https://gem.wiki/Frontier_wind_farm	L907349	G910269	US26441C2044	1	552	552	3	2061	2101	2141	0	352	352	352	352	352	352	352	352	352	352	352
wind	United States	Americas	Northern America	Happy Jack Windpower Project	1			29	operating	2008		onshore						Duke Energy CORP		41.1413	-105.009	exact		Laramie County		Wyoming	https://gem.wiki/Happy_Jack_Windpower_Project	L906536	G908825	US26441C2044	1	29	29	16	2048	2088	2128	29	29	29	29	29	29	29	29	29	29	29	29
wind	United States	Americas	Northern America	Ironwood wind farm	1			168	operating	2012		onshore						Duke Energy CORP [50%]; Sumitomo Corporation of Americas [50%]		37.8386	-99.774	exact		Ford County		Kansas	https://gem.wiki/Ironwood_wind_farm	L907281	G909808	US26441C2044	0.5	168	168	12	2052	2092	2132	84	84	84	84	84	84	84	84	84	84	84	84
wind	United States	Americas	Northern America	Kit Carson Project wind farm	1			51	operating	2010		onshore						Duke Energy CORP		39.354	-102.305	exact		Kit Carson County		Colorado	https://gem.wiki/Kit_Carson_Project_wind_farm	L906705	G909029	US26441C2044	1	51	51	14	2050	2090	2130	51	51	51	51	51	51	51	51	51	51	51	51
wind	United States	Americas	Northern America	Laurel Hill wind farm	1			69	operating	2012		onshore						Duke Energy CORP		41.5269	-77.0462	exact		Lycoming County		Pennsylvania	https://gem.wiki/Laurel_Hill_wind_farm	L906791	G909144	US26441C2044	1	69	69	12	2052	2092	2132	69	69	69	69	69	69	69	69	69	69	69	69
wind	United States	Americas	Northern America	Ledyard wind farm	1		Ledyard Windpower	207	operating	2022		onshore						Duke Energy CORP		43.4392	-94.1589	exact		Kossuth County		Iowa	https://gem.wiki/Ledyard_wind_farm	L917224	G921370	US26441C2044	1	207	207	2	2062	2102	2142	0	0	207	207	207	207	207	207	207	207	207	207
wind	United States	Americas	Northern America	Los Vientos wind farm	1			200	operating	2012		onshore						Duke Energy CORP		26.3082	-97.582	exact		Cameron County		Texas	https://gem.wiki/Los_Vientos_wind_farm	L907073	G927309	US26441C2044	1	912		12	2052	2092	2132	200	200	200	200	200	200	200	200	200	200	200	200
wind	United States	Americas	Northern America	Los Vientos wind farm	2			202	operating	2012		onshore						Duke Energy CORP		26.3488	-97.6901	exact		Willacy County		Texas	https://gem.wiki/Los_Vientos_wind_farm	L907073	G927310	US26441C2044	1	912		12	2052	2092	2132	202	202	202	202	202	202	202	202	202	202	202	202
wind	United States	Americas	Northern America	Los Vientos wind farm	3			200	operating	2015		onshore						Duke Energy CORP		26.4281	-98.6032	exact		Starr County		Texas	https://gem.wiki/Los_Vientos_wind_farm	L907073	G909942	US26441C2044	1	912		9	2055	2095	2135	200	200	200	200	200	200	200	200	200	200	200	200
wind	United States	Americas	Northern America	Los Vientos wind farm	5			110	operating	2015		onshore						Duke Energy CORP		26.4056	-98.5784	exact		Starr County		Texas	https://gem.wiki/Los_Vientos_wind_farm	L907073	G909522	US26441C2044	1	912		9	2055	2095	2135	110	110	110	110	110	110	110	110	110	110	110	110
wind	United States	Americas	Northern America	Los Vientos wind farm	4			200	operating	2016		onshore						Duke Energy CORP		26.5482	-98.7101	exact		Starr County		Texas	https://gem.wiki/Los_Vientos_wind_farm	L907073	G909943	US26441C2044	1	912	912	8	2056	2096	2136	200	200	200	200	200	200	200	200	200	200	200	200
wind	United States	Americas	Northern America	Maryneal Windpower Farm	1			182	operating	2021		onshore						Duke Energy CORP		32.1918	-100.503	exact	Maryneal	Nolan County		Texas	https://gem.wiki/Maryneal_Windpower_Farm	L907311	G909847	US26441C2044	1	182	182	3	2061	2101	2141	0	182	182	182	182	182	182	182	182	182	182	182
wind	United States	Americas	Northern America	Mesquite Creek wind farm	1			211	operating	2015		onshore						Duke Energy CORP		32.6928	-101.696	exact		Dawson County		Texas	https://gem.wiki/Mesquite_Creek_wind_farm	L907449	G910045	US26441C2044	1	211	211	9	2055	2095	2135	211	211	211	211	211	211	211	211	211	211	211	211
wind	United States	Americas	Northern America	Mesteño wind farm	1			202	operating	2019		onshore						Duke Energy CORP		26.4905	-98.7305	exact		Starr County		Texas	https://gem.wiki/Mesteño_wind_farm	L907419	G910001	US26441C2044	1	202	202	5	2059	2099	2139	202	202	202	202	202	202	202	202	202	202	202	202
wind	United States	Americas	Northern America	North Allegheny Windpower Project	1			70	operating	2009		onshore						Duke Energy CORP		40.3765	-78.6286	exact	Portage Township	Cambria County		Pennsylvania	https://gem.wiki/North_Allegheny_Windpower_Project	L906796	G909150	US26441C2044	1	70	70	15	2049	2089	2129	70	70	70	70	70	70	70	70	70	70	70	70
wind	United States	Americas	Northern America	Notrees Windpower Hybrid	1			92	operating	2009		onshore						Duke Energy CORP		31.9667	-102.809	exact		Winkler County		Texas	https://gem.wiki/Notrees_Windpower_Hybrid	L906746	G909315	US26441C2044	1	152		15	2049	2089	2129	92	92	92	92	92	92	92	92	92	92	92	92
wind	United States	Americas	Northern America	Notrees Windpower Hybrid	2			60	operating	2009		onshore						Duke Energy CORP		31.9667	-102.809	exact		Winkler County		Texas	https://gem.wiki/Notrees_Windpower_Hybrid	L906746	G909085	US26441C2044	1	152	152	15	2049	2089	2129	60	60	60	60	60	60	60	60	60	60	60	60
wind	United States	Americas	Northern America	Ocotillo (Duke) Windpower	1			59	operating	2008		onshore						Duke Energy CORP		32.1576	-101.397	exact		Howard County		Texas	https://gem.wiki/Ocotillo_(Duke)_Windpower	L906727	G909061	US26441C2044	1	59	59	16	2048	2088	2128	59	59	59	59	59	59	59	59	59	59	59	59
wind	United States	Americas	Northern America	Shirley Wind Project	1			20	operating	2010		onshore						Duke Energy CORP		44.3475	-87.9197	exact		Brown County		Wisconsin	https://gem.wiki/Shirley_Wind_Project	L906427	G908703	US26441C2044	1	20	20	14	2050	2090	2130	20	20	20	20	20	20	20	20	20	20	20	20
wind	United States	Americas	Northern America	Silver Sage Windpower	1			42	operating	2009		onshore						Duke Energy CORP		41.137	-105.029	exact		Laramie County		Wyoming	https://gem.wiki/Silver_Sage_Windpower	L906629	G908938	US26441C2044	1	42	42	15	2049	2089	2129	42	42	42	42	42	42	42	42	42	42	42	42
wind	United States	Americas	Northern America	Sweetwater wind farm	5			80	operating	2007		onshore						Leeward Energy [53%]; Duke Energy CORP [47%]		32.2371	-100.491	exact		Nolan County		Texas	https://gem.wiki/Sweetwater_wind_farm	L906593	G909274	US26441C2044	0.47	321		17	2047	2087	2127	37.6	37.6	37.6	37.6	37.6	37.6	37.6	37.6	37.6	37.6	37.6	37.6
wind	United States	Americas	Northern America	Sweetwater wind farm	4A			135	operating	2007		onshore						Leeward Energy [53%]; Duke Energy CORP [47%]		32.2839	-100.533	exact		Nolan County		Texas	https://gem.wiki/Sweetwater_wind_farm	L906593	G909626	US26441C2044	0.47	321		17	2047	2087	2127	63.45	63.45	63.45	63.45	63.45	63.45	63.45	63.45	63.45	63.45	63.45	63.45
wind	United States	Americas	Northern America	Sweetwater wind farm	4B			106	operating	2007		onshore						Leeward Energy [53%]; Duke Energy CORP [47%]		32.2488	-100.496	exact		Nolan County		Texas	https://gem.wiki/Sweetwater_wind_farm	L906593	G909501	US26441C2044	0.47	321	321	17	2047	2087	2127	49.82	49.82	49.82	49.82	49.82	49.82	49.82	49.82	49.82	49.82	49.82	49.82
wind	United States	Americas	Northern America	Top Of The World Windpower Project	1			200	operating	2010		onshore						Duke Energy CORP		42.9632	-105.74	exact		Converse County		Wyoming	https://gem.wiki/Top_Of_The_World_Windpower_Project	L907409	G909979	US26441C2044	1	200	200	14	2050	2090	2130	200	200	200	200	200	200	200	200	200	200	200	200
wind	United States	Americas	Northern America	Wilmington East Wind Energy Area	1		OCS-A 0546	893	pre-construction			offshore hard mount						Duke Energy CORP		33.6767	-78.0402	approximate	Oak Island			North Carolina	https://gem.wiki/Wilmington_East_Wind_Energy_Area	L907702	G910367	US26441C2044	1	893	893	-99	40	80	120	0	0	0	0	0	0	0	0	0	893	893	893
																																					TOTAL Capacity	55499.1	55528.1	56448.1	57085.1	57506.1	56551.1	56551.1	54374.9	51871.3	49938.1	47778.1	47778.1
																																					Coal	17660	16645	16645	16645	16205	15250	15250	13073.8	10570.2	7744	5584	5584
																																					Oil&Gas	25356.7	25356.7	25356.7	25356.7	25892.7	25892.7	25892.7	25892.7	25892.7	25892.7	25892.7	25892.7
																																					Fossil fuel	43016.7	42001.7	42001.7	42001.7	42097.7	41142.7	41142.7	38966.5	36462.9	33636.7	31476.7	31476.7
																																					Renewables	7370.37	8414.37	9334.37	9971.37	10200.4	11155.3	11155.3	13331.5	15835.1	19554.3	21714.3	21714.3
																																					Oil	17696.2	17696.2	17696.2	17696.2	18232.2	18232.2	18232.2	18232.2	18232.2	18232.2	18232.2	18232.2
																																					Gas	24076.5	24076.5	24076.5	24076.5	24612.5	24612.5	24612.5	24612.5	24612.5	24612.5	24612.5	24612.5
																																					Nuclear	5112	5112	5112	5112	5112	5112	5112	5112	5112	5112	5112	5112
																																					Wind	2616.37	3150.37	3357.37	3357.37	3357.37	3357.37	3357.37	3357.37	3357.37	4250.37	4250.37	4250.37
																																					solar	1623	2133	2846	3483	3808	3808	3808	3808	3808	3808	3808	3808
																																					hydropower	3131	3131	3131	3131	3131	3131	3131	3131	3131	3131	3131	3131
[truncated: 19 more columns]

## Sheet: DukeEnergy_fossilfuel
Type	Country/area	Region	Subregion	Plant / Project name	Unit / Phase name	Plant / Project name (local)	Plant / Project name (other)	Capacity (MW)	Status	Start year	Retired year	Technology	Fuel	Country/area 1 (hydropower only)	Country/area 2 (hydropower only)	Country/area 1 Capacity (MW) (hydropower only)	Country/area 2 Capacity (MW) (hydropower only)	Owner	Parent	Latitude	Longitude	Location accuracy	City	Local area (taluk, county)	Major area (prefecture, district)	Subnational unit (state, province)	GEM.Wiki URL	GEM location ID	GEM unit/phase ID	CompISIN	Ownership	Plant capacity	Plant capacity	Age	Reinvestment year	Reinvestment year	Reinvestment year	Coal capacity factor 2020	Gas capacity factor 2020	Oil capacity factor 2020	Coal capacity factor 2021	Gas capacity factor 2021	Oil capacity factor 2021	Coal capacity factor 2022	Gas capacity factor 2022	Oil capacity factor 2022	Coal capacity factor 2023	Gas capacity factor 2023	Oil capacity factor 2023
coal	United States	Americas	Northern America	Belews Creek Steam Station	Unit 1			1080	operating	1974	2039	supercritical	bituminous					Duke Energy Carolinas [100%]	Duke Energy Corp [100.0%]	36.2825	-80.0585	exact	Walnut Cove	Stokes		North Carolina	https://www.gem.wiki/Belews_Creek_Steam_Station	L100000104072	G100000100736	US26441C2044	1	6480		50	2014	2054	2094	0.317018	0	0	0.326265	0	0	0.259583	0	0	0.241954	0	0
coal	United States	Americas	Northern America	Belews Creek Steam Station	Unit 2			1080	operating	1975	2039	supercritical	bituminous					Duke Energy Carolinas [100%]	Duke Energy Corp [100.0%]	36.2825	-80.0585	exact	Walnut Cove	Stokes		North Carolina	https://www.gem.wiki/Belews_Creek_Steam_Station	L100000104072	G100000100737	US26441C2044	1	6480	6480	49	2015	2055	2095	0.317018	0	0	0.326265	0	0	0.259583	0	0	0.241954	0	0
coal	United States	Americas	Northern America	Cayuga Generating Station	Unit 1			531	operating	1970	2027	subcritical	bituminous					Duke Energy Indiana [100%]	Duke Energy Corp [100.0%]	39.9233	-87.4274	exact	Cayuga	Vermillion		Indiana	https://www.gem.wiki/Cayuga_Generating_Station	L100000103880	G100000101246	US26441C2044	1	3525		54	2010	2050	2090	0.317018	0	0	0.326265	0	0	0.259583	0	0	0.241954	0	0
coal	United States	Americas	Northern America	Cayuga Generating Station	Unit 2			531	operating	1972	2027	subcritical	bituminous					Duke Energy Indiana [100%]	Duke Energy Corp [100.0%]	39.9233	-87.4274	exact	Cayuga	Vermillion		Indiana	https://www.gem.wiki/Cayuga_Generating_Station	L100000103880	G100000101247	US26441C2044	1	3525	3525	52	2012	2052	2092	0.317018	0	0	0.326265	0	0	0.259583	0	0	0.241954	0	0
coal	United States	Americas	Northern America	Crystal River Energy Complex	Unit 4			739.2	operating	1982		subcritical	bituminous					Duke Energy Florida [100%]	Duke Energy Corp [100.0%]	28.957	-82.7006	exact	Crystal River	Citrus		Florida	https://www.gem.wiki/Crystal_River_Energy_Complex	L100000103825	G100000101841	US26441C2044	1	10345.2		42	2022	2062	2102	0.317018	0	0	0.326265	0	0	0.259583	0	0	0.241954	0	0
coal	United States	Americas	Northern America	Crystal River Energy Complex	Unit 5			739.2	operating	1984		subcritical	bituminous					Duke Energy Florida [100%]	Duke Energy Corp [100.0%]	28.957	-82.7006	exact	Crystal River	Citrus		Florida	https://www.gem.wiki/Crystal_River_Energy_Complex	L100000103825	G100000101842	US26441C2044	1	10345.2	10345.2	40	2024	2064	2104	0.317018	0	0	0.326265	0	0	0.259583	0	0	0.241954	0	0
coal	United States	Americas	Northern America	East Bend Generating Station	Unit 2			669.3	operating	1981		subcritical	bituminous					Duke Energy Kentucky [100%]	Duke Energy Corp [100.0%]	38.9042	-84.8513	exact	Rabbit Hash	Boone		Kentucky	https://www.gem.wiki/East_Bend_Generating_Station	L100000103938	G100000102546	US26441C2044	1	2007.9	2007.9	43	2021	2061	2101	0.317018	0	0	0.326265	0	0	0.259583	0	0	0.241954	0	0
coal	United States	Americas	Northern America	Edwardsport power station	Unit 1			236.5	operating	2013		IGCC	unknown					Duke Energy Indiana [100%]	Duke Energy Corp [100.0%]	38.7975	-87.2505	exact	Edwardsport			Indiana	https://www.gem.wiki/Edwardsport_power_station	L100000103885	G100000102595	US26441C2044	1	2413.5		11	2053	2093	2133	0.317018	0	0	0.326265	0	0	0.259583	0	0	0.241954	0	0
coal	United States	Americas	Northern America	Edwardsport power station	Unit 2			236.5	operating	2013		IGCC	unknown					Duke Energy Indiana [100%]	Duke Energy Corp [100.0%]	38.7975	-87.2505	exact	Edwardsport			Indiana	https://www.gem.wiki/Edwardsport_power_station	L100000103885	G100000115937	US26441C2044	1	2413.5		11	2053	2093	2133	0.317018	0	0	0.326265	0	0	0.259583	0	0	0.241954	0	0
coal	United States	Americas	Northern America	Edwardsport power station	Unit 3			331.5	operating	2013		IGCC	unknown					Duke Energy Indiana [100%]	Duke Energy Corp [100.0%]	38.7975	-87.2505	exact	Edwardsport			Indiana	https://www.gem.wiki/Edwardsport_power_station	L100000103885	G100000115938	US26441C2044	1	2413.5	2413.5	11	2053	2093	2133	0.317018	0	0	0.326265	0	0	0.259583	0	0	0.241954	0	0
coal	United States	Americas	Northern America	G.G. Allen Steam Plant	Unit 2			165	retired	1957	2021	subcritical	bituminous					Duke Energy Carolinas [100%]	Duke Energy Corp [100.0%]	35.1903	-81.0083	exact	Belmont	Gaston		North Carolina	https://www.gem.wiki/G.G._Allen_Steam_Plant	L100000104079	G100000102876	US26441C2044	1	3465		67	1997	2037	2077	0.317018	0	0	0.326265	0	0	0.259583	0	0	0.241954	0	0
coal	United States	Americas	Northern America	G.G. Allen Steam Plant	Unit 1			165	operating	1957	2024	subcritical	bituminous					Duke Energy Carolinas [100%]	Duke Energy Corp [100.0%]	35.1903	-81.0083	exact	Belmont	Gaston		North Carolina	https://www.gem.wiki/G.G._Allen_Steam_Plant	L100000104079	G100000102875	US26441C2044	1	3465		67	1997	2037	2077	0.317018	0	0	0.326265	0	0	0.259583	0	0	0.241954	0	0
coal	United States	Americas	Northern America	G.G. Allen Steam Plant	Unit 3			275	retired	1959	2021	subcritical	bituminous					Duke Energy Carolinas [100%]	Duke Energy Corp [100.0%]	35.1903	-81.0083	exact	Belmont	Gaston		North Carolina	https://www.gem.wiki/G.G._Allen_Steam_Plant	L100000104079	G100000102877	US26441C2044	1	3465		65	1999	2039	2079	0.317018	0	0	0.326265	0	0	0.259583	0	0	0.241954	0	0
coal	United States	Americas	Northern America	G.G. Allen Steam Plant	Unit 4			275	retired	1960	2021	subcritical	bituminous					Duke Energy Carolinas [100%]	Duke Energy Corp [100.0%]	35.1903	-81.0083	exact	Belmont	Gaston		North Carolina	https://www.gem.wiki/G.G._Allen_Steam_Plant	L100000104079	G100000102878	US26441C2044	1	3465		64	2000	2040	2080	0.317018	0	0	0.326265	0	0	0.259583	0	0	0.241954	0	0
coal	United States	Americas	Northern America	G.G. Allen Steam Plant	Unit 5			275	operating	1961	2024	subcritical	bituminous					Duke Energy Carolinas [100%]	Duke Energy Corp [100.0%]	35.1903	-81.0083	exact	Belmont	Gaston		North Carolina	https://www.gem.wiki/G.G._Allen_Steam_Plant	L100000104079	G100000102879	US26441C2044	1	3465	3465	63	2001	2041	2081	0.317018	0	0	0.326265	0	0	0.259583	0	0	0.241954	0	0
coal	United States	Americas	Northern America	Gallagher Generating Station	Unit 2		R. Gallagher Generating Station	150	retired	1958	2021	subcritical	bituminous					Duke Energy Indiana [100%]	Duke Energy Corp [100.0%]	38.2637	-85.8381	exact	New Albany	Floyd		Indiana	https://www.gem.wiki/Gallagher_Generating_Station	L100000103888	G100000102909	US26441C2044	1	900		66	1998	2038	2078	0.317018	0	0	0.326265	0	0	0.259583	0	0	0.241954	0	0
coal	United States	Americas	Northern America	Gallagher Generating Station	Unit 4		R. Gallagher Generating Station	150	retired	1961	2021	subcritical	bituminous					Duke Energy Indiana [100%]	Duke Energy Corp [100.0%]	38.2637	-85.8381	exact	New Albany	Floyd		Indiana	https://www.gem.wiki/Gallagher_Generating_Station	L100000103888	G100000102911	US26441C2044	1	900	900	63	2001	2041	2081	0.317018	0	0	0.326265	0	0	0.259583	0	0	0.241954	0	0
coal	United States	Americas	Northern America	Gibson Generating Station	Unit 1			667.9	operating	1975	2035	supercritical	bituminous					Duke Energy Indiana [100%]	Duke Energy Corp [100.0%]	38.3714	-87.7682	exact	East Mount Carmel	Gibson		Indiana	https://www.gem.wiki/Gibson_Generating_Station	L100000103889	G100000103028	US26441C2044	1	10018.5		49	2015	2055	2095	0.317018	0	0	0.326265	0	0	0.259583	0	0	0.241954	0	0
coal	United States	Americas	Northern America	Gibson Generating Station	Unit 2			667.9	operating	1976	2035	supercritical	bituminous					Duke Energy Indiana [100%]	Duke Energy Corp [100.0%]	38.3714	-87.7682	exact	East Mount Carmel	Gibson		Indiana	https://www.gem.wiki/Gibson_Generating_Station	L100000103889	G100000103029	US26441C2044	1	10018.5		48	2016	2056	2096	0.317018	0	0	0.326265	0	0	0.259583	0	0	0.241954	0	0
coal	United States	Americas	Northern America	Gibson Generating Station	Unit 3			667.9	operating	1978	2029	supercritical	bituminous					Duke Energy Indiana [100%]	Duke Energy Corp [100.0%]	38.3714	-87.7682	exact	East Mount Carmel	Gibson		Indiana	https://www.gem.wiki/Gibson_Generating_Station	L100000103889	G100000103030	US26441C2044	1	10018.5		46	2018	2058	2098	0.317018	0	0	0.326265	0	0	0.259583	0	0	0.241954	0	0
coal	United States	Americas	Northern America	Gibson Generating Station	Unit 4			667.9	operating	1979	2029	supercritical	bituminous					Duke Energy Indiana [100%]	Duke Energy Corp [100.0%]	38.3714	-87.7682	exact	East Mount Carmel	Gibson		Indiana	https://www.gem.wiki/Gibson_Generating_Station	L100000103889	G100000103031	US26441C2044	1	10018.5		45	2019	2059	2099	0.317018	0	0	0.326265	0	0	0.259583	0	0	0.241954	0	0
coal	United States	Americas	Northern America	Gibson Generating Station	Unit 5			667.9	operating	1982	2025	supercritical	bituminous					Wabash Valley Power Association [25%]; Indiana Municipal Power Agency [24%]; Duke Energy Indiana [50%]	Duke Energy Corp [50.0%]; Wabash Valley Power Association [25.0%]; Indiana Municipal Power Agency [25.0%]	38.3714	-87.7682	exact	East Mount Carmel	Gibson		Indiana	https://www.gem.wiki/Gibson_Generating_Station	L100000103889	G100000103032	US26441C2044	0.5	10018.5	10018.5	42	2022	2062	2102	0.317018	0	0	0.326265	0	0	0.259583	0	0	0.241954	0	0
coal	United States	Americas	Northern America	James E. Rogers Energy Complex	Unit 5		Cliffside Plant	621	operating	1972	2025	subcritical	bituminous					Duke Energy Carolinas [100%]	Duke Energy Corp [100.0%]	35.2164	-81.7624	exact	Cliffside	Cleveland		North Carolina	https://www.gem.wiki/James_E._Rogers_Energy_Complex	L100000104075	G100000101608	US26441C2044	1	4591.5	4591.5	52	2012	2052	2092	0.317018	0	0	0.326265	0	0	0.259583	0	0	0.241954	0	0
coal	United States	Americas	Northern America	Marshall Steam Station	Unit 1			350	operating	1965	2028	subcritical	bituminous					Duke Energy Carolinas [100%]	Duke Energy Corp [100.0%]	35.5979	-80.9612	exact	Terrell	Catawba		North Carolina	https://www.gem.wiki/Marshall_Steam_Station	L100000104082	G100000106696	US26441C2044	1	5988		59	2005	2045	2085	0.317018	0	0	0.326265	0	0	0.259583	0	0	0.241954	0	0
coal	United States	Americas	Northern America	Marshall Steam Station	Unit 2			350	operating	1966	2028	subcritical	bituminous					Duke Energy Carolinas [100%]	Duke Energy Corp [100.0%]	35.5979	-80.9612	exact	Terrell	Catawba		North Carolina	https://www.gem.wiki/Marshall_Steam_Station	L100000104082	G100000106697	US26441C2044	1	5988		58	2006	2046	2086	0.317018	0	0	0.326265	0	0	0.259583	0	0	0.241954	0	0
coal	United States	Americas	Northern America	Marshall Steam Station	Unit 3			648	operating	1969	2033	supercritical	bituminous					Duke Energy Carolinas [100%]	Duke Energy Corp [100.0%]	35.5979	-80.9612	exact	Terrell	Catawba		North Carolina	https://www.gem.wiki/Marshall_Steam_Station	L100000104082	G100000106698	US26441C2044	1	5988		55	2009	2049	2089	0.317018	0	0	0.326265	0	0	0.259583	0	0	0.241954	0	0
coal	United States	Americas	Northern America	Marshall Steam Station	Unit 4			648	operating	1970	2033	supercritical	bituminous					Duke Energy Carolinas [100%]	Duke Energy Corp [100.0%]	35.5979	-80.9612	exact	Terrell	Catawba		North Carolina	https://www.gem.wiki/Marshall_Steam_Station	L100000104082	G100000106699	US26441C2044	1	5988	5988	54	2010	2050	2090	0.317018	0	0	0.326265	0	0	0.259583	0	0	0.241954	0	0
coal	United States	Americas	Northern America	Mayo Generating Plant	Unit 1			735.8	operating	1983	2028	subcritical	bituminous					Duke Energy Progress [100%]	Duke Energy Corp [100.0%]	36.5278	-78.8919	exact	Bethel Hill	Person		North Carolina	https://www.gem.wiki/Mayo_Generating_Plant	L100000104083	G100000106764	US26441C2044	1	2207.4	2207.4	41	2023	2063	2103	0.317018	0	0	0.326265	0	0	0.259583	0	0	0.241954	0	0
coal	United States	Americas	Northern America	Miami Fort Station	Unit 7			557.1	operating	1975	2027	subcritical	bituminous					Luminant Miami Fort [100%]	Duke Energy Corp; Vistra Corp	39.1131	-84.8029	exact	North Bend	Hamilton		Ohio	https://www.gem.wiki/Miami_Fort_Station	L100000104113	G100000106903	US26441C2044	1	3342.6		49	2015	2055	2095	0.317018	0	0	0.326265	0	0	0.259583	0	0	0.241954	0	0
coal	United States	Americas	Northern America	Miami Fort Station	Unit 8			557.1	operating	1978	2027	subcritical	bituminous					Luminant Miami Fort [100%]	Duke Energy Corp; Vistra Corp	39.1131	-84.8029	exact	North Bend	Hamilton		Ohio	https://www.gem.wiki/Miami_Fort_Station	L100000104113	G100000106904	US26441C2044	1	3342.6	3342.6	46	2018	2058	2098	0.317018	0	0	0.326265	0	0	0.259583	0	0	0.241954	0	0
coal	United States	Americas	Northern America	Roxboro Steam Plant	Unit 1			410.8	operating	1966	2028	subcritical	bituminous					Duke Energy Progress [100%]	Duke Energy Corp [100.0%]	36.4841	-79.0722	exact	Roxboro	Person		North Carolina	https://www.gem.wiki/Roxboro_Steam_Plant	L100000104086	G100000108650	US26441C2044	1	7674.6		58	2006	2046	2086	0.317018	0	0	0.326265	0	0	0.259583	0	0	0.241954	0	0
coal	United States	Americas	Northern America	Roxboro Steam Plant	Unit 2			657	operating	1968	2028	subcritical	bituminous					Duke Energy Progress [100%]	Duke Energy Corp [100.0%]	36.4841	-79.0722	exact	Roxboro	Person		North Carolina	https://www.gem.wiki/Roxboro_Steam_Plant	L100000104086	G100000108651	US26441C2044	1	7674.6		56	2008	2048	2088	0.317018	0	0	0.326265	0	0	0.259583	0	0	0.241954	0	0
coal	United States	Americas	Northern America	Roxboro Steam Plant	Unit 3			745.2	operating	1973	2029	subcritical	bituminous					Duke Energy Progress [100%]	Duke Energy Corp [100.0%]	36.4841	-79.0722	exact	Roxboro	Person		North Carolina	https://www.gem.wiki/Roxboro_Steam_Plant	L100000104086	G100000108652	US26441C2044	1	7674.6		51	2013	2053	2093	0.317018	0	0	0.326265	0	0	0.259583	0	0	0.241954	0	0
coal	United States	Americas	Northern America	Roxboro Steam Plant	Unit 4			745.2	operating	1980	2029	subcritical	bituminous					Duke Energy Progress [100%]	Duke Energy Corp [100.0%]	36.4841	-79.0722	exact	Roxboro	Person		North Carolina	https://www.gem.wiki/Roxboro_Steam_Plant	L100000104086	G100000108653	US26441C2044	1	7674.6	7674.6	44	2020	2060	2100	0.317018	0	0	0.326265	0	0	0.259583	0	0	0.241954	0	0
oil/gas	United States	Americas	Northern America	Anclote power station	1			556	operating	1974		ST	NG/FO					Duke Energy Florida LLC [100.0%]	Duke Energy Corp [100.0%]	28.1844	-82.7886	exact	Holiday	Pasco		Florida	https://www.gem.wiki/Anclote_power_station	L100000401865	G100000402735	US26441C2044	1	3336		50	2014	2054	2094	0	0.400848	0	0	0.43301	0	0	0.490009	0	0	0.383083	0
oil/gas	United States	Americas	Northern America	Anclote power station	2			556	operating	1978		ST	NG/FO					Duke Energy Florida LLC [100.0%]	Duke Energy Corp [100.0%]	28.1844	-82.7886	exact	Holiday	Pasco		Florida	https://www.gem.wiki/Anclote_power_station	L100000401865	G100000402736	US26441C2044	1	3336	3336	46	2018	2058	2098	0	0.400848	0	0	0.43301	0	0	0.490009	0	0	0.383083	0
oil/gas	United States	Americas	Northern America	Asheville Plant	GT1			212	operating	1999		GT	NG/FO					Duke Energy Progress LLC [100.0%]	Duke Energy Corp [100.0%]	35.4731	-82.5417	exact	Arden	Buncombe		North Carolina	https://www.gem.wiki/Asheville_Plant	L100000104071	G100000402774	US26441C2044	1	3036		25	2039	2079	2119	0	0.400848	0	0	0.43301	0	0	0.490009	0	0	0.383083	0
oil/gas	United States	Americas	Northern America	Asheville Plant	GT2			212	operating	2000		GT	NG/FO					Duke Energy Progress LLC [100.0%]	Duke Energy Corp [100.0%]	35.4731	-82.5417	exact	Arden	Buncombe		North Carolina	https://www.gem.wiki/Asheville_Plant	L100000104071	G100000402775	US26441C2044	1	3036		24	2040	2080	2120	0	0.400848	0	0	0.43301	0	0	0.490009	0	0	0.383083	0
oil/gas	United States	Americas	Northern America	Asheville Plant	CC1			294	operating	2019		CC	NG/FO					Duke Energy Progress LLC [100.0%]	Duke Energy Corp [100.0%]	35.4731	-82.5417	exact	Arden	Buncombe		North Carolina	https://www.gem.wiki/Asheville_Plant	L100000104071	G100000401653	US26441C2044	1	3036		5	2059	2099	2139	0	0.400848	0	0	0.43301	0	0	0.490009	0	0	0.383083	0
oil/gas	United States	Americas	Northern America	Asheville Plant	CC2			294	operating	2020		CC	NG/FO					Duke Energy Progress LLC [100.0%]	Duke Energy Corp [100.0%]	35.4731	-82.5417	exact	Arden	Buncombe		North Carolina	https://www.gem.wiki/Asheville_Plant	L100000104071	G100000401654	US26441C2044	1	3036	3036	4	2060	2100	2140	0	0.400848	0	0	0.43301	0	0	0.490009	0	0	0.383083	0
oil/gas	United States	Americas	Northern America	Bayboro power station	P1			56.7	operating	1973		GT	FO					Duke Energy Florida LLC [100.0%]	Duke Energy Corp [100.0%]	27.7581	-82.6353	exact	St. Petersburg	Pinellas		Florida	https://www.gem.wiki/Bayboro_power_station	L100000409200	G100000414308	US26441C2044	1	680.4		51	2013	2053	2093	0	0	0.0259287	0	0	0.0259287	0	0	0.0326657	0	0	0.0326657
oil/gas	United States	Americas	Northern America	Bayboro power station	P2			56.7	operating	1973		GT	FO					Duke Energy Florida LLC [100.0%]	Duke Energy Corp [100.0%]	27.7581	-82.6353	exact	St. Petersburg	Pinellas		Florida	https://www.gem.wiki/Bayboro_power_station	L100000409200	G100000414307	US26441C2044	1	680.4		51	2013	2053	2093	0	0	0.0259287	0	0	0.0259287	0	0	0.0326657	0	0	0.0326657
oil/gas	United States	Americas	Northern America	Bayboro power station	P3			56.7	operating	1973		GT	FO					Duke Energy Florida LLC [100.0%]	Duke Energy Corp [100.0%]	27.7581	-82.6353	exact	St. Petersburg	Pinellas		Florida	https://www.gem.wiki/Bayboro_power_station	L100000409200	G100000414306	US26441C2044	1	680.4		51	2013	2053	2093	0	0	0.0259287	0	0	0.0259287	0	0	0.0326657	0	0	0.0326657
oil/gas	United States	Americas	Northern America	Bayboro power station	P4			56.7	operating	1973		GT	FO					Duke Energy Florida LLC [100.0%]	Duke Energy Corp [100.0%]	27.7581	-82.6353	exact	St. Petersburg	Pinellas		Florida	https://www.gem.wiki/Bayboro_power_station	L100000409200	G100000414305	US26441C2044	1	680.4	680.4	51	2013	2053	2093	0	0	0.0259287	0	0	0.0259287	0	0	0.0326657	0	0	0.0326657
oil/gas	United States	Americas	Northern America	Buck Steam Station	CC1			698	operating	2011		CC	NG/FO					Duke Energy Carolinas LLC [100.0%]	Duke Energy Corp [100.0%]	35.7133	-80.3767	exact	Salisbury	Rowan		North Carolina	https://www.gem.wiki/Buck_Steam_Station	L100000104073	G100000401655	US26441C2044	1	2094	2094	13	2051	2091	2131	0	0.400848	0	0	0.43301	0	0	0.490009	0	0	0.383083	0
oil/gas	United States	Americas	Northern America	Cayuga Generating Station	4			113	operating	1993		GT	FO/NG					Duke Energy Indiana LLC [100.0%]	Duke Energy Corp [100.0%]	39.9242	-87.4244	exact	Cayuga	Vermillion		Indiana	https://www.gem.wiki/Cayuga_Generating_Station	L100000103880	G100000402752	US26441C2044	1	3525	3525	31	2033	2073	2113	0	0	0.0259287	0	0	0.0259287	0	0	0.0326657	0	0	0.0326657
oil/gas	United States	Americas	Northern America	Crystal River Energy Complex	CC1		Citrus CC power station	985	operating	2018		CC	NG					Duke Energy Florida LLC [100.0%]	Duke Energy Corp [100.0%]	28.9656	-82.6977	exact	Crystal River	Citrus		Florida	https://www.gem.wiki/Crystal_River_Energy_Complex	L100000103825	G100000402124	US26441C2044	1	10345.2		6	2058	2098	2138	0	0.400848	0	0	0.43301	0	0	0.490009	0	0	0.383083	0
oil/gas	United States	Americas	Northern America	Crystal River Energy Complex	CC2		Citrus CC power station	985	operating	2018		CC	NG					Duke Energy Florida LLC [100.0%]	Duke Energy Corp [100.0%]	28.9656	-82.6977	exact	Crystal River	Citrus		Florida	https://www.gem.wiki/Crystal_River_Energy_Complex	L100000103825	G100000402125	US26441C2044	1	10345.2	10345.2	6	2058	2098	2138	0	0.400848	0	0	0.43301	0	0	0.490009	0	0	0.383083	0
oil/gas	United States	Americas	Northern America	Dan River Steam Station	CC1			698	operating	2012		CC	NG					Duke Energy Carolinas LLC [100.0%]	Duke Energy Corp [100.0%]	36.4862	-79.7208	exact	Eden	Rockingham		North Carolina	https://www.gem.wiki/Dan_River_Steam_Station	L100000104076	G100000401656	US26441C2044	1	2094	2094	12	2052	2092	2132	0	0.400848	0	0	0.43301	0	0	0.490009	0	0	0.383083	0
oil/gas	United States	Americas	Northern America	Darlington County power station	12			158	operating	1997		GT	NG/FO					Duke Energy Progress LLC [100.0%]	Duke Energy Corp [100.0%]	34.4185	-80.1657	exact	Hartsville	Darlington		South Carolina	https://www.gem.wiki/Darlington_County_power_station	L100000401882	G100000402777	US26441C2044	1	948		27	2037	2077	2117	0	0.400848	0	0	0.43301	0	0	0.490009	0	0	0.383083	0
oil/gas	United States	Americas	Northern America	Darlington County power station	13			158	operating	1997		GT	NG/FO					Duke Energy Progress LLC [100.0%]	Duke Energy Corp [100.0%]	34.4185	-80.1657	exact	Hartsville	Darlington		South Carolina	https://www.gem.wiki/Darlington_County_power_station	L100000401882	G100000402778	US26441C2044	1	948	948	27	2037	2077	2117	0	0.400848	0	0	0.43301	0	0	0.490009	0	0	0.383083	0
oil/gas	United States	Americas	Northern America	DeBary power station	3			66.8	operating	1975		GT	FO					Duke Energy Florida LLC [100.0%]	Duke Energy Corp [100.0%]	28.9039	-81.3323	exact	DeBary	Volusia		Florida	https://www.gem.wiki/DeBary_power_station	L100000401867	G100000414280	US26441C2044	1	2248.5		49	2015	2055	2095	0	0	0.0259287	0	0	0.0259287	0	0	0.0326657	0	0	0.0326657
oil/gas	United States	Americas	Northern America	DeBary power station	5			66.8	operating	1975		GT	FO					Duke Energy Florida LLC [100.0%]	Duke Energy Corp [100.0%]	28.9039	-81.3323	exact	DeBary	Volusia		Florida	https://www.gem.wiki/DeBary_power_station	L100000401867	G100000414278	US26441C2044	1	2248.5		49	2015	2055	2095	0	0	0.0259287	0	0	0.0259287	0	0	0.0326657	0	0	0.0326657
oil/gas	United States	Americas	Northern America	DeBary power station	2			66.8	operating	1976		GT	FO					Duke Energy Florida LLC [100.0%]	Duke Energy Corp [100.0%]	28.9039	-81.3323	exact	DeBary	Volusia		Florida	https://www.gem.wiki/DeBary_power_station	L100000401867	G100000414281	US26441C2044	1	2248.5		48	2016	2056	2096	0	0	0.0259287	0	0	0.0259287	0	0	0.0326657	0	0	0.0326657
oil/gas	United States	Americas	Northern America	DeBary power station	4			66.8	operating	1976		GT	FO					Duke Energy Florida LLC [100.0%]	Duke Energy Corp [100.0%]	28.9039	-81.3323	exact	DeBary	Volusia		Florida	https://www.gem.wiki/DeBary_power_station	L100000401867	G100000414279	US26441C2044	1	2248.5		48	2016	2056	2096	0	0	0.0259287	0	0	0.0259287	0	0	0.0326657	0	0	0.0326657
oil/gas	United States	Americas	Northern America	DeBary power station	6			66.8	operating	1976		GT	FO					Duke Energy Florida LLC [100.0%]	Duke Energy Corp [100.0%]	28.9039	-81.3323	exact	DeBary	Volusia		Florida	https://www.gem.wiki/DeBary_power_station	L100000401867	G100000414277	US26441C2044	1	2248.5		48	2016	2056	2096	0	0	0.0259287	0	0	0.0259287	0	0	0.0326657	0	0	0.0326657
oil/gas	United States	Americas	Northern America	DeBary power station	7			104	operating	1992		GT	NG/FO					Duke Energy Florida LLC [100.0%]	Duke Energy Corp [100.0%]	28.9039	-81.3323	exact	DeBary	Volusia		Florida	https://www.gem.wiki/DeBary_power_station	L100000401867	G100000402737	US26441C2044	1	2248.5		32	2032	2072	2112	0	0.400848	0	0	0.43301	0	0	0.490009	0	0	0.383083	0
oil/gas	United States	Americas	Northern America	DeBary power station	8			104	operating	1992		GT	NG/FO					Duke Energy Florida LLC [100.0%]	Duke Energy Corp [100.0%]	28.9039	-81.3323	exact	DeBary	Volusia		Florida	https://www.gem.wiki/DeBary_power_station	L100000401867	G100000402738	US26441C2044	1	2248.5		32	2032	2072	2112	0	0.400848	0	0	0.43301	0	0	0.490009	0	0	0.383083	0
oil/gas	United States	Americas	Northern America	DeBary power station	9			104	operating	1992		GT	NG/FO					Duke Energy Florida LLC [100.0%]	Duke Energy Corp [100.0%]	28.9039	-81.3323	exact	DeBary	Volusia		Florida	https://www.gem.wiki/DeBary_power_station	L100000401867	G100000402739	US26441C2044	1	2248.5		32	2032	2072	2112	0	0.400848	0	0	0.43301	0	0	0.490009	0	0	0.383083	0
oil/gas	United States	Americas	Northern America	DeBary power station	10			103.5	operating	1992		GT	FO					Duke Energy Florida LLC [100.0%]	Duke Energy Corp [100.0%]	28.9039	-81.3323	exact	DeBary	Volusia		Florida	https://www.gem.wiki/DeBary_power_station	L100000401867	G100000414282	US26441C2044	1	2248.5	2248.5	32	2032	2072	2112	0	0	0.0259287	0	0	0.0259287	0	0	0.0326657	0	0	0.0326657
oil/gas	United States	Americas	Northern America	Henry County power station	1			61	operating	2001		GT	NG					Duke Energy Indiana LLC [100.0%]	Duke Energy Corp [100.0%]	39.9528	-85.5039	exact	New Castle	Henry		Indiana	https://www.gem.wiki/Henry_County_power_station	L100000401876	G100000402753	US26441C2044	1	549		23	2041	2081	2121	0	0.400848	0	0	0.43301	0	0	0.490009	0	0	0.383083	0
oil/gas	United States	Americas	Northern America	Henry County power station	2			61	operating	2001		GT	NG					Duke Energy Indiana LLC [100.0%]	Duke Energy Corp [100.0%]	39.9528	-85.5039	exact	New Castle	Henry		Indiana	https://www.gem.wiki/Henry_County_power_station	L100000401876	G100000402754	US26441C2044	1	549		23	2041	2081	2121	0	0.400848	0	0	0.43301	0	0	0.490009	0	0	0.383083	0
oil/gas	United States	Americas	Northern America	Henry County power station	3			61	operating	2001		GT	NG					Duke Energy Indiana LLC [100.0%]	Duke Energy Corp [100.0%]	39.9528	-85.5039	exact	New Castle	Henry		Indiana	https://www.gem.wiki/Henry_County_power_station	L100000401876	G100000402755	US26441C2044	1	549	549	23	2041	2081	2121	0	0.400848	0	0	0.43301	0	0	0.490009	0	0	0.383083	0
oil/gas	United States	Americas	Northern America	Hines energy complex	E100			547	operating	1999		CC	NG/FO					Duke Energy Florida LLC [100.0%]	Duke Energy Corp [100.0%]	27.7882	-81.87	exact	Bartow	Polk		Florida	https://www.gem.wiki/Hines_energy_complex	L100000401868	G100000402149	US26441C2044	1	6801		25	2039	2079	2119	0	0.400848	0	0	0.43301	0	0	0.490009	0	0	0.383083	0
oil/gas	United States	Americas	Northern America	Hines energy complex	F110			548	operating	2003		CC	NG/FO					Duke Energy Florida LLC [100.0%]	Duke Energy Corp [100.0%]	27.7882	-81.87	exact	Bartow	Polk		Florida	https://www.gem.wiki/Hines_energy_complex	L100000401868	G100000402150	US26441C2044	1	6801		21	2043	2083	2123	0	0.400848	0	0	0.43301	0	0	0.490009	0	0	0.383083	0
oil/gas	United States	Americas	Northern America	Hines energy complex	G301			561	operating	2005		CC	NG/FO					Duke Energy Florida LLC [100.0%]	Duke Energy Corp [100.0%]	27.7882	-81.87	exact	Bartow	Polk		Florida	https://www.gem.wiki/Hines_energy_complex	L100000401868	G100000402151	US26441C2044	1	6801		19	2045	2085	2125	0	0.400848	0	0	0.43301	0	0	0.490009	0	0	0.383083	0
oil/gas	United States	Americas	Northern America	Hines energy complex	H400			611	operating	2007		CC	NG/FO					Duke Energy Florida LLC [100.0%]	Duke Energy Corp [100.0%]	27.7882	-81.87	exact	Bartow	Polk		Florida	https://www.gem.wiki/Hines_energy_complex	L100000401868	G100000402152	US26441C2044	1	6801	6801	17	2047	2087	2127	0	0.400848	0	0	0.43301	0	0	0.490009	0	0	0.383083	0
oil/gas	United States	Americas	Northern America	Intercession City power station	P1			56.7	operating	1974		GT	FO					Duke Energy Florida LLC [100.0%]	Duke Energy Corp [100.0%]	28.2628	-81.5486	exact	Intercession City	Osceola		Florida	https://www.gem.wiki/Intercession_City_power_station	L100000401869	G100000414258	US26441C2044	1	3596.1		50	2014	2054	2094	0	0	0.0259287	0	0	0.0259287	0	0	0.0326657	0	0	0.0326657
oil/gas	United States	Americas	Northern America	Intercession City power station	P2			56.7	operating	1974		GT	FO					Duke Energy Florida LLC [100.0%]	Duke Energy Corp [100.0%]	28.2628	-81.5486	exact	Intercession City	Osceola		Florida	https://www.gem.wiki/Intercession_City_power_station	L100000401869	G100000414257	US26441C2044	1	3596.1		50	2014	2054	2094	0	0	0.0259287	0	0	0.0259287	0	0	0.0326657	0	0	0.0326657
oil/gas	United States	Americas	Northern America	Intercession City power station	P3			56.7	operating	1974		GT	FO					Duke Energy Florida LLC [100.0%]	Duke Energy Corp [100.0%]	28.2628	-81.5486	exact	Intercession City	Osceola		Florida	https://www.gem.wiki/Intercession_City_power_station	L100000401869	G100000414256	US26441C2044	1	3596.1		50	2014	2054	2094	0	0	0.0259287	0	0	0.0259287	0	0	0.0326657	0	0	0.0326657
oil/gas	United States	Americas	Northern America	Intercession City power station	P4			56.7	operating	1974		GT	FO					Duke Energy Florida LLC [100.0%]	Duke Energy Corp [100.0%]	28.2628	-81.5486	exact	Intercession City	Osceola		Florida	https://www.gem.wiki/Intercession_City_power_station	L100000401869	G100000414255	US26441C2044	1	3596.1		50	2014	2054	2094	0	0	0.0259287	0	0	0.0259287	0	0	0.0326657	0	0	0.0326657
oil/gas	United States	Americas	Northern America	Intercession City power station	P5			56.7	operating	1974		GT	FO					Duke Energy Florida LLC [100.0%]	Duke Energy Corp [100.0%]	28.2628	-81.5486	exact	Intercession City	Osceola		Florida	https://www.gem.wiki/Intercession_City_power_station	L100000401869	G100000414254	US26441C2044	1	3596.1		50	2014	2054	2094	0	0	0.0259287	0	0	0.0259287	0	0	0.0326657	0	0	0.0326657
oil/gas	United States	Americas	Northern America	Intercession City power station	P6			56.7	operating	1974		GT	FO					Duke Energy Florida LLC [100.0%]	Duke Energy Corp [100.0%]	28.2628	-81.5486	exact	Intercession City	Osceola		Florida	https://www.gem.wiki/Intercession_City_power_station	L100000401869	G100000414253	US26441C2044	1	3596.1		50	2014	2054	2094	0	0	0.0259287	0	0	0.0259287	0	0	0.0326657	0	0	0.0326657
oil/gas	United States	Americas	Northern America	Intercession City power station	P10			104	operating	1993		GT	NG/FO					Duke Energy Florida LLC [100.0%]	Duke Energy Corp [100.0%]	28.2628	-81.5486	exact	Intercession City	Osceola		Florida	https://www.gem.wiki/Intercession_City_power_station	L100000401869	G100000402740	US26441C2044	1	3596.1		31	2033	2073	2113	0	0.400848	0	0	0.43301	0	0	0.490009	0	0	0.383083	0
oil/gas	United States	Americas	Northern America	Intercession City power station	P7			104	operating	1993		GT	NG/FO					Duke Energy Florida LLC [100.0%]	Duke Energy Corp [100.0%]	28.2628	-81.5486	exact	Intercession City	Osceola		Florida	https://www.gem.wiki/Intercession_City_power_station	L100000401869	G100000402744	US26441C2044	1	3596.1		31	2033	2073	2113	0	0.400848	0	0	0.43301	0	0	0.490009	0	0	0.383083	0
oil/gas	United States	Americas	Northern America	Intercession City power station	P8			104	operating	1993		GT	NG/FO					Duke Energy Florida LLC [100.0%]	Duke Energy Corp [100.0%]	28.2628	-81.5486	exact	Intercession City	Osceola		Florida	https://www.gem.wiki/Intercession_City_power_station	L100000401869	G100000402745	US26441C2044	1	3596.1		31	2033	2073	2113	0	0.400848	0	0	0.43301	0	0	0.490009	0	0	0.383083	0
oil/gas	United States	Americas	Northern America	Intercession City power station	P9			104	operating	1993		GT	NG/FO					Duke Energy Florida LLC [100.0%]	Duke Energy Corp [100.0%]	28.2628	-81.5486	exact	Intercession City	Osceola		Florida	https://www.gem.wiki/Intercession_City_power_station	L100000401869	G100000402746	US26441C2044	1	3596.1		31	2033	2073	2113	0	0.400848	0	0	0.43301	0	0	0.490009	0	0	0.383083	0
oil/gas	United States	Americas	Northern America	Intercession City power station	P11			148.5	operating	1997		GT	FO					Duke Energy Florida LLC [66.7%]; Georgia Power Co [33.3%]	Duke Energy Corp [66.7%]; Southern Co [33.3%]	28.2628	-81.5486	exact	Intercession City	Osceola		Florida	https://www.gem.wiki/Intercession_City_power_station	L100000401869	G100000414252	US26441C2044	0.667	3596.1		27	2037	2077	2117	0	0	0.0259287	0	0	0.0259287	0	0	0.0326657	0	0	0.0326657
oil/gas	United States	Americas	Northern America	Intercession City power station	P12			98	operating	2000		GT	NG/FO					Duke Energy Florida LLC [100.0%]	Duke Energy Corp [100.0%]	28.2628	-81.5486	exact	Intercession City	Osceola		Florida	https://www.gem.wiki/Intercession_City_power_station	L100000401869	G100000402741	US26441C2044	1	3596.1		24	2040	2080	2120	0	0.400848	0	0	0.43301	0	0	0.490009	0	0	0.383083	0
oil/gas	United States	Americas	Northern America	Intercession City power station	P13			98	operating	2000		GT	NG/FO					Duke Energy Florida LLC [100.0%]	Duke Energy Corp [100.0%]	28.2628	-81.5486	exact	Intercession City	Osceola		Florida	https://www.gem.wiki/Intercession_City_power_station	L100000401869	G100000402742	US26441C2044	1	3596.1		24	2040	2080	2120	0	0.400848	0	0	0.43301	0	0	0.490009	0	0	0.383083	0
oil/gas	United States	Americas	Northern America	Intercession City power station	P14			98	operating	2000		GT	NG/FO					Duke Energy Florida LLC [100.0%]	Duke Energy Corp [100.0%]	28.2628	-81.5486	exact	Intercession City	Osceola		Florida	https://www.gem.wiki/Intercession_City_power_station	L100000401869	G100000402743	US26441C2044	1	3596.1	3596.1	24	2040	2080	2120	0	0.400848	0	0	0.43301	0	0	0.490009	0	0	0.383083	0
oil/gas	United States	Americas	Northern America	James E. Rogers Energy Complex	6			909.5	operating	2018		ST	NG/C					Duke Energy Carolinas LLC [100.0%]	Duke Energy Corp [100.0%]	35.22	-81.7594	exact	Cliffside	Cleveland		North Carolina	https://www.gem.wiki/James_E._Rogers_Energy_Complex	L100000104075	G100000101609	US26441C2044	1	4591.5	4591.5	6	2058	2098	2138	0	0.400848	0	0	0.43301	0	0	0.490009	0	0	0.383083	0
oil/gas	United States	Americas	Northern America	L V Sutton Combined Cycle power station	1			730	operating	2013		CC	NG/FO					Duke Energy Progress LLC [100.0%]	Duke Energy Corp [100.0%]	34.2831	-77.9853	exact	Wilmington	New Hanover		North Carolina	https://www.gem.wiki/L_V_Sutton_Combined_Cycle_power_station	L100000401883	G100000402067	US26441C2044	1	2556		11	2053	2093	2133	0	0.400848	0	0	0.43301	0	0	0.490009	0	0	0.383083	0
oil/gas	United States	Americas	Northern America	L V Sutton Combined Cycle power station	CT004			61	operating	2017		GT	NG/FO					Duke Energy Progress LLC [100.0%]	Duke Energy Corp [100.0%]	34.2831	-77.9853	exact	Wilmington	New Hanover		North Carolina	https://www.gem.wiki/L_V_Sutton_Combined_Cycle_power_station	L100000401883	G100000402781	US26441C2044	1	2556		7	2057	2097	2137	0	0.400848	0	0	0.43301	0	0	0.490009	0	0	0.383083	0
oil/gas	United States	Americas	Northern America	L V Sutton Combined Cycle power station	CT005			61	operating	2017		GT	NG/FO					Duke Energy Progress LLC [100.0%]	Duke Energy Corp [100.0%]	34.2831	-77.9853	exact	Wilmington	New Hanover		North Carolina	https://www.gem.wiki/L_V_Sutton_Combined_Cycle_power_station	L100000401883	G100000402782	US26441C2044	1	2556	2556	7	2057	2097	2137	0	0.400848	0	0	0.43301	0	0	0.490009	0	0	0.383083	0
oil/gas	United States	Americas	Northern America	Lee Steam Plant	CC1		Lee Combined Cycle Plant	1068	operating	2012		CC	NG/FO					Duke Energy Progress LLC [100.0%]	Duke Energy Corp [100.0%]	35.3736	-78.0894	exact	Goldsboro	Wayne		North Carolina	https://www.gem.wiki/Lee_Steam_Plant	L100000104080	G100000402060	US26441C2044	1	3204	3204	12	2052	2092	2132	0	0.400848	0	0	0.43301	0	0	0.490009	0	0	0.383083	0
oil/gas	United States	Americas	Northern America	Lincoln Combustion power station	1			110	operating	1995		GT	NG/FO					Duke Energy Carolinas LLC [100.0%]	Duke Energy Corp [100.0%]	35.4317	-81.0347	exact	Stanley	Lincoln		North Carolina	https://www.gem.wiki/Lincoln_Combustion_power_station	L100000401861	G100000402703	US26441C2044	1	6888		29	2035	2075	2115	0	0.400848	0	0	0.43301	0	0	0.490009	0	0	0.383083	0
oil/gas	United States	Americas	Northern America	Lincoln Combustion power station	2			110	operating	1995		GT	NG/FO					Duke Energy Carolinas LLC [100.0%]	Duke Energy Corp [100.0%]	35.4317	-81.0347	exact	Stanley	Lincoln		North Carolina	https://www.gem.wiki/Lincoln_Combustion_power_station	L100000401861	G100000402711	US26441C2044	1	6888		29	2035	2075	2115	0	0.400848	0	0	0.43301	0	0	0.490009	0	0	0.383083	0
oil/gas	United States	Americas	Northern America	Lincoln Combustion power station	3			110	operating	1995		GT	NG/FO					Duke Energy Carolinas LLC [100.0%]	Duke Energy Corp [100.0%]	35.4317	-81.0347	exact	Stanley	Lincoln		North Carolina	https://www.gem.wiki/Lincoln_Combustion_power_station	L100000401861	G100000402712	US26441C2044	1	6888		29	2035	2075	2115	0	0.400848	0	0	0.43301	0	0	0.490009	0	0	0.383083	0
oil/gas	United States	Americas	Northern America	Lincoln Combustion power station	4			110	operating	1995		GT	NG/FO					Duke Energy Carolinas LLC [100.0%]	Duke Energy Corp [100.0%]	35.4317	-81.0347	exact	Stanley	Lincoln		North Carolina	https://www.gem.wiki/Lincoln_Combustion_power_station	L100000401861	G100000402713	US26441C2044	1	6888		29	2035	2075	2115	0	0.400848	0	0	0.43301	0	0	0.490009	0	0	0.383083	0
oil/gas	United States	Americas	Northern America	Lincoln Combustion power station	5			110	operating	1995		GT	NG/FO					Duke Energy Carolinas LLC [100.0%]	Duke Energy Corp [100.0%]	35.4317	-81.0347	exact	Stanley	Lincoln		North Carolina	https://www.gem.wiki/Lincoln_Combustion_power_station	L100000401861	G100000402714	US26441C2044	1	6888		29	2035	2075	2115	0	0.400848	0	0	0.43301	0	0	0.490009	0	0	0.383083	0
oil/gas	United States	Americas	Northern America	Lincoln Combustion power station	6			110	operating	1995		GT	NG/FO					Duke Energy Carolinas LLC [100.0%]	Duke Energy Corp [100.0%]	35.4317	-81.0347	exact	Stanley	Lincoln		North Carolina	https://www.gem.wiki/Lincoln_Combustion_power_station	L100000401861	G100000402715	US26441C2044	1	6888		29	2035	2075	2115	0	0.400848	0	0	0.43301	0	0	0.490009	0	0	0.383083	0
oil/gas	United States	Americas	Northern America	Lincoln Combustion power station	7			110	operating	1995		GT	NG/FO					Duke Energy Carolinas LLC [100.0%]	Duke Energy Corp [100.0%]	35.4317	-81.0347	exact	Stanley	Lincoln		North Carolina	https://www.gem.wiki/Lincoln_Combustion_power_station	L100000401861	G100000402716	US26441C2044	1	6888		29	2035	2075	2115	0	0.400848	0	0	0.43301	0	0	0.490009	0	0	0.383083	0
oil/gas	United States	Americas	Northern America	Lincoln Combustion power station	8			110	operating	1995		GT	NG/FO					Duke Energy Carolinas LLC [100.0%]	Duke Energy Corp [100.0%]	35.4317	-81.0347	exact	Stanley	Lincoln		North Carolina	https://www.gem.wiki/Lincoln_Combustion_power_station	L100000401861	G100000402717	US26441C2044	1	6888		29	2035	2075	2115	0	0.400848	0	0	0.43301	0	0	0.490009	0	0	0.383083	0
oil/gas	United States	Americas	Northern America	Lincoln Combustion power station	9			110	operating	1995		GT	NG/FO					Duke Energy Carolinas LLC [100.0%]	Duke Energy Corp [100.0%]	35.4317	-81.0347	exact	Stanley	Lincoln		North Carolina	https://www.gem.wiki/Lincoln_Combustion_power_station	L100000401861	G100000402718	US26441C2044	1	6888		29	2035	2075	2115	0	0.400848	0	0	0.43301	0	0	0.490009	0	0	0.383083	0
oil/gas	United States	Americas	Northern America	Lincoln Combustion power station	10			110	operating	1995		GT	NG/FO					Duke Energy Carolinas LLC [100.0%]	Duke Energy Corp [100.0%]	35.4317	-81.0347	exact	Stanley	Lincoln		North Carolina	https://www.gem.wiki/Lincoln_Combustion_power_station	L100000401861	G100000402704	US26441C2044	1	6888		29	2035	2075	2115	0	0.400848	0	0	0.43301	0	0	0.490009	0	0	0.383083	0
oil/gas	United States	Americas	Northern America	Lincoln Combustion power station	11			110	operating	1995		GT	NG/FO					Duke Energy Carolinas LLC [100.0%]	Duke Energy Corp [100.0%]	35.4317	-81.0347	exact	Stanley	Lincoln		North Carolina	https://www.gem.wiki/Lincoln_Combustion_power_station	L100000401861	G100000402705	US26441C2044	1	6888		29	2035	2075	2115	0	0.400848	0	0	0.43301	0	0	0.490009	0	0	0.383083	0
oil/gas	United States	Americas	Northern America	Lincoln Combustion power station	12			110	operating	1995		GT	NG/FO					Duke Energy Carolinas LLC [100.0%]	Duke Energy Corp [100.0%]	35.4317	-81.0347	exact	Stanley	Lincoln		North Carolina	https://www.gem.wiki/Lincoln_Combustion_power_station	L100000401861	G100000402706	US26441C2044	1	6888		29	2035	2075	2115	0	0.400848	0	0	0.43301	0	0	0.490009	0	0	0.383083	0
oil/gas	United States	Americas	Northern America	Lincoln Combustion power station	13			110	operating	1996		GT	NG/FO					Duke Energy Carolinas LLC [100.0%]	Duke Energy Corp [100.0%]	35.4317	-81.0347	exact	Stanley	Lincoln		North Carolina	https://www.gem.wiki/Lincoln_Combustion_power_station	L100000401861	G100000402707	US26441C2044	1	6888		28	2036	2076	2116	0	0.400848	0	0	0.43301	0	0	0.490009	0	0	0.383083	0
oil/gas	United States	Americas	Northern America	Lincoln Combustion power station	14			110	operating	1996		GT	NG/FO					Duke Energy Carolinas LLC [100.0%]	Duke Energy Corp [100.0%]	35.4317	-81.0347	exact	Stanley	Lincoln		North Carolina	https://www.gem.wiki/Lincoln_Combustion_power_station	L100000401861	G100000402708	US26441C2044	1	6888		28	2036	2076	2116	0	0.400848	0	0	0.43301	0	0	0.490009	0	0	0.383083	0
oil/gas	United States	Americas	Northern America	Lincoln Combustion power station	15			110	operating	1996		GT	NG/FO					Duke Energy Carolinas LLC [100.0%]	Duke Energy Corp [100.0%]	35.4317	-81.0347	exact	Stanley	Lincoln		North Carolina	https://www.gem.wiki/Lincoln_Combustion_power_station	L100000401861	G100000402709	US26441C2044	1	6888		28	2036	2076	2116	0	0.400848	0	0	0.43301	0	0	0.490009	0	0	0.383083	0
oil/gas	United States	Americas	Northern America	Lincoln Combustion power station	16			110	operating	1996		GT	NG/FO					Duke Energy Carolinas LLC [100.0%]	Duke Energy Corp [100.0%]	35.4317	-81.0347	exact	Stanley	Lincoln		North Carolina	https://www.gem.wiki/Lincoln_Combustion_power_station	L100000401861	G100000402710	US26441C2044	1	6888		28	2036	2076	2116	0	0.400848	0	0	0.43301	0	0	0.490009	0	0	0.383083	0
oil/gas	United States	Americas	Northern America	Lincoln Combustion power station	17			536	construction	2024		GT	NG/FO					Duke Energy Carolinas LLC [100.0%]	Duke Energy Corp [100.0%]	35.4317	-81.0347	exact	Stanley	Lincoln		North Carolina	https://www.gem.wiki/Lincoln_Combustion_power_station	L100000401861	G100000409461	US26441C2044	1	6888	6888	0	2064	2104	2144	0	0.400848	0	0	0.43301	0	0	0.490009	0	0	0.383083	0
oil/gas	United States	Americas	Northern America	Madison power station	CT1			87	operating	2000		GT	NG					Duke Energy Indiana LLC [100.0%]	Duke Energy Corp [100.0%]	39.4522	-84.4647	exact	Trenton	Butler		Ohio	https://www.gem.wiki/Madison_power_station	L100000401877	G100000402756	US26441C2044	1	2088		24	2040	2080	2120	0	0.400848	0	0	0.43301	0	0	0.490009	0	0	0.383083	0
oil/gas	United States	Americas	Northern America	Madison power station	CT2			87	operating	2000		GT	NG					Duke Energy Indiana LLC [100.0%]	Duke Energy Corp [100.0%]	39.4522	-84.4647	exact	Trenton	Butler		Ohio	https://www.gem.wiki/Madison_power_station	L100000401877	G100000402757	US26441C2044	1	2088		24	2040	2080	2120	0	0.400848	0	0	0.43301	0	0	0.490009	0	0	0.383083	0
oil/gas	United States	Americas	Northern America	Madison power station	CT3			87	operating	2000		GT	NG					Duke Energy Indiana LLC [100.0%]	Duke Energy Corp [100.0%]	39.4522	-84.4647	exact	Trenton	Butler		Ohio	https://www.gem.wiki/Madison_power_station	L100000401877	G100000402758	US26441C2044	1	2088		24	2040	2080	2120	0	0.400848	0	0	0.43301	0	0	0.490009	0	0	0.383083	0
oil/gas	United States	Americas	Northern America	Madison power station	CT4			87	operating	2000		GT	NG					Duke Energy Indiana LLC [100.0%]	Duke Energy Corp [100.0%]	39.4522	-84.4647	exact	Trenton	Butler		Ohio	https://www.gem.wiki/Madison_power_station	L100000401877	G100000402759	US26441C2044	1	2088		24	2040	2080	2120	0	0.400848	0	0	0.43301	0	0	0.490009	0	0	0.383083	0
oil/gas	United States	Americas	Northern America	Madison power station	CT5			87	operating	2000		GT	NG					Duke Energy Indiana LLC [100.0%]	Duke Energy Corp [100.0%]	39.4522	-84.4647	exact	Trenton	Butler		Ohio	https://www.gem.wiki/Madison_power_station	L100000401877	G100000402760	US26441C2044	1	2088		24	2040	2080	2120	0	0.400848	0	0	0.43301	0	0	0.490009	0	0	0.383083	0
oil/gas	United States	Americas	Northern America	Madison power station	CT6			87	operating	2000		GT	NG					Duke Energy Indiana LLC [100.0%]	Duke Energy Corp [100.0%]	39.4522	-84.4647	exact	Trenton	Butler		Ohio	https://www.gem.wiki/Madison_power_station	L100000401877	G100000402761	US26441C2044	1	2088		24	2040	2080	2120	0	0.400848	0	0	0.43301	0	0	0.490009	0	0	0.383083	0
oil/gas	United States	Americas	Northern America	Madison power station	CT7			87	operating	2000		GT	NG					Duke Energy Indiana LLC [100.0%]	Duke Energy Corp [100.0%]	39.4522	-84.4647	exact	Trenton	Butler		Ohio	https://www.gem.wiki/Madison_power_station	L100000401877	G100000402762	US26441C2044	1	2088		24	2040	2080	2120	0	0.400848	0	0	0.43301	0	0	0.490009	0	0	0.383083	0
oil/gas	United States	Americas	Northern America	Madison power station	CT8			87	operating	2000		GT	NG					Duke Energy Indiana LLC [100.0%]	Duke Energy Corp [100.0%]	39.4522	-84.4647	exact	Trenton	Butler		Ohio	https://www.gem.wiki/Madison_power_station	L100000401877	G100000402763	US26441C2044	1	2088	2088	24	2040	2080	2120	0	0.400848	0	0	0.43301	0	0	0.490009	0	0	0.383083	0
oil/gas	United States	Americas	Northern America	Mill Creek (SC) power station	1			100	operating	2002		GT	NG/FO					Duke Energy Carolinas LLC [100.0%]	Duke Energy Corp [100.0%]	35.1597	-81.4306	exact	Blacksburg	Cherokee		South Carolina	https://www.gem.wiki/Mill_Creek_(SC)_power_station	L100000401862	G100000402719	US26441C2044	1	2400		22	2042	2082	2122	0	0.400848	0	0	0.43301	0	0	0.490009	0	0	0.383083	0
oil/gas	United States	Americas	Northern America	Mill Creek (SC) power station	2			100	operating	2002		GT	NG/FO					Duke Energy Carolinas LLC [100.0%]	Duke Energy Corp [100.0%]	35.1597	-81.4306	exact	Blacksburg	Cherokee		South Carolina	https://www.gem.wiki/Mill_Creek_(SC)_power_station	L100000401862	G100000402720	US26441C2044	1	2400		22	2042	2082	2122	0	0.400848	0	0	0.43301	0	0	0.490009	0	0	0.383083	0
oil/gas	United States	Americas	Northern America	Mill Creek (SC) power station	3			100	operating	2002		GT	NG/FO					Duke Energy Carolinas LLC [100.0%]	Duke Energy Corp [100.0%]	35.1597	-81.4306	exact	Blacksburg	Cherokee		South Carolina	https://www.gem.wiki/Mill_Creek_(SC)_power_station	L100000401862	G100000402721	US26441C2044	1	2400		22	2042	2082	2122	0	0.400848	0	0	0.43301	0	0	0.490009	0	0	0.383083	0
oil/gas	United States	Americas	Northern America	Mill Creek (SC) power station	4			100	operating	2002		GT	NG/FO					Duke Energy Carolinas LLC [100.0%]	Duke Energy Corp [100.0%]	35.1597	-81.4306	exact	Blacksburg	Cherokee		South Carolina	https://www.gem.wiki/Mill_Creek_(SC)_power_station	L100000401862	G100000402722	US26441C2044	1	2400		22	2042	2082	2122	0	0.400848	0	0	0.43301	0	0	0.490009	0	0	0.383083	0
oil/gas	United States	Americas	Northern America	Mill Creek (SC) power station	5			100	operating	2003		GT	NG/FO					Duke Energy Carolinas LLC [100.0%]	Duke Energy Corp [100.0%]	35.1597	-81.4306	exact	Blacksburg	Cherokee		South Carolina	https://www.gem.wiki/Mill_Creek_(SC)_power_station	L100000401862	G100000402723	US26441C2044	1	2400		21	2043	2083	2123	0	0.400848	0	0	0.43301	0	0	0.490009	0	0	0.383083	0
oil/gas	United States	Americas	Northern America	Mill Creek (SC) power station	6			100	operating	2003		GT	NG/FO					Duke Energy Carolinas LLC [100.0%]	Duke Energy Corp [100.0%]	35.1597	-81.4306	exact	Blacksburg	Cherokee		South Carolina	https://www.gem.wiki/Mill_Creek_(SC)_power_station	L100000401862	G100000402724	US26441C2044	1	2400		21	2043	2083	2123	0	0.400848	0	0	0.43301	0	0	0.490009	0	0	0.383083	0
oil/gas	United States	Americas	Northern America	Mill Creek (SC) power station	7			100	operating	2003		GT	NG/FO					Duke Energy Carolinas LLC [100.0%]	Duke Energy Corp [100.0%]	35.1597	-81.4306	exact	Blacksburg	Cherokee		South Carolina	https://www.gem.wiki/Mill_Creek_(SC)_power_station	L100000401862	G100000402725	US26441C2044	1	2400		21	2043	2083	2123	0	0.400848	0	0	0.43301	0	0	0.490009	0	0	0.383083	0
oil/gas	United States	Americas	Northern America	Mill Creek (SC) power station	8			100	operating	2003		GT	NG/FO					Duke Energy Carolinas LLC [100.0%]	Duke Energy Corp [100.0%]	35.1597	-81.4306	exact	Blacksburg	Cherokee		South Carolina	https://www.gem.wiki/Mill_Creek_(SC)_power_station	L100000401862	G100000402726	US26441C2044	1	2400	2400	21	2043	2083	2123	0	0.400848	0	0	0.43301	0	0	0.490009	0	0	0.383083	0
oil/gas	United States	Americas	Northern America	Noblesville power station	CC1			283	operating	2003		CC	NG					Duke Energy Indiana LLC [100.0%]	Duke Energy Corp [100.0%]	40.0969	-85.9714	exact	Noblesville	Hamilton		Indiana	https://www.gem.wiki/Noblesville_power_station	L100000401878	G100000401582	US26441C2044	1	849	849	21	2043	2083	2123	0	0.400848	0	0	0.43301	0	0	0.490009	0	0	0.383083	0
oil/gas	United States	Americas	Northern America	Osprey energy center power plant	COEC			644	operating	2004		CC	NG					Duke Energy Florida LLC [100.0%]	Duke Energy Corp [100.0%]	28.0525	-81.8083	exact	Auburndale	Polk		Florida	https://www.gem.wiki/Osprey_energy_center_power_plant	L100000401870	G100000401919	US26441C2044	1	1932	1932	20	2044	2084	2124	0	0.400848	0	0	0.43301	0	0	0.490009	0	0	0.383083	0
oil/gas	United States	Americas	Northern America	P L Bartow power station	P1			55.4	operating	1972		GT	FO					Duke Energy Florida LLC [100.0%]	Duke Energy Corp [100.0%]	27.8595	-82.6018	exact	St. Petersburg	Pinellas		Florida	https://www.gem.wiki/P_L_Bartow_power_station	L100000401871	G100000414219	US26441C2044	1	4424.4		52	2012	2052	2092	0	0	0.0259287	0	0	0.0259287	0	0	0.0326657	0	0	0.0326657
oil/gas	United States	Americas	Northern America	P L Bartow power station	P2			55	operating	1972		GT	NG/FO					Duke Energy Florida LLC [100.0%]	Duke Energy Corp [100.0%]	27.8595	-82.6018	exact	St. Petersburg	Pinellas		Florida	https://www.gem.wiki/P_L_Bartow_power_station	L100000401871	G100000402747	US26441C2044	1	4424.4		52	2012	2052	2092	0	0.400848	0	0	0.43301	0	0	0.490009	0	0	0.383083	0
oil/gas	United States	Americas	Northern America	P L Bartow power station	P3			55.4	operating	1972		GT	FO					Duke Energy Florida LLC [100.0%]	Duke Energy Corp [100.0%]	27.8595	-82.6018	exact	St. Petersburg	Pinellas		Florida	https://www.gem.wiki/P_L_Bartow_power_station	L100000401871	G100000414218	US26441C2044	1	4424.4		52	2012	2052	2092	0	0	0.0259287	0	0	0.0259287	0	0	0.0326657	0	0	0.0326657
oil/gas	United States	Americas	Northern America	P L Bartow power station	P4			55	operating	1972		GT	NG/FO					Duke Energy Florida LLC [100.0%]	Duke Energy Corp [100.0%]	27.8595	-82.6018	exact	St. Petersburg	Pinellas		Florida	https://www.gem.wiki/P_L_Bartow_power_station	L100000401871	G100000402748	US26441C2044	1	4424.4		52	2012	2052	2092	0	0.400848	0	0	0.43301	0	0	0.490009	0	0	0.383083	0
oil/gas	United States	Americas	Northern America	P L Bartow power station	G981			1254	operating	2009		CC	NG/FO					Duke Energy Florida LLC [100.0%]	Duke Energy Corp [100.0%]	27.8595	-82.6018	exact	St. Petersburg	Pinellas		Florida	https://www.gem.wiki/P_L_Bartow_power_station	L100000401871	G100000402127	US26441C2044	1	4424.4	4424.4	15	2049	2089	2129	0	0.400848	0	0	0.43301	0	0	0.490009	0	0	0.383083	0
oil/gas	United States	Americas	Northern America	Rockingham County CT Station	CT1			196	mothballed	2000		GT	NG/FO					Duke Energy Carolinas LLC [100.0%]	Duke Energy Corp [100.0%]	36.3297	-79.8297	exact	Reidsville	Rockingham		North Carolina	https://www.gem.wiki/Rockingham_County_CT_Station	L100000401863	G100000402727	US26441C2044	1	2940		24	2040	2080	2120	0	0.400848	0	0	0.43301	0	0	0.490009	0	0	0.383083	0
oil/gas	United States	Americas	Northern America	Rockingham County CT Station	CT2			196	mothballed	2000		GT	NG/FO					Duke Energy Carolinas LLC [100.0%]	Duke Energy Corp [100.0%]	36.3297	-79.8297	exact	Reidsville	Rockingham		North Carolina	https://www.gem.wiki/Rockingham_County_CT_Station	L100000401863	G100000402728	US26441C2044	1	2940		24	2040	2080	2120	0	0.400848	0	0	0.43301	0	0	0.490009	0	0	0.383083	0
oil/gas	United States	Americas	Northern America	Rockingham County CT Station	CT3			196	mothballed	2000		GT	NG/FO					Duke Energy Carolinas LLC [100.0%]	Duke Energy Corp [100.0%]	36.3297	-79.8297	exact	Reidsville	Rockingham		North Carolina	https://www.gem.wiki/Rockingham_County_CT_Station	L100000401863	G100000402729	US26441C2044	1	2940		24	2040	2080	2120	0	0.400848	0	0	0.43301	0	0	0.490009	0	0	0.383083	0
oil/gas	United States	Americas	Northern America	Rockingham County CT Station	CT4			196	mothballed	2000		GT	NG/FO					Duke Energy Carolinas LLC [100.0%]	Duke Energy Corp [100.0%]	36.3297	-79.8297	exact	Reidsville	Rockingham		North Carolina	https://www.gem.wiki/Rockingham_County_CT_Station	L100000401863	G100000402730	US26441C2044	1	2940		24	2040	2080	2120	0	0.400848	0	0	0.43301	0	0	0.490009	0	0	0.383083	0
oil/gas	United States	Americas	Northern America	Rockingham County CT Station	CT5			196	mothballed	2000		GT	NG/FO					Duke Energy Carolinas LLC [100.0%]	Duke Energy Corp [100.0%]	36.3297	-79.8297	exact	Reidsville	Rockingham		North Carolina	https://www.gem.wiki/Rockingham_County_CT_Station	L100000401863	G100000402731	US26441C2044	1	2940	2940	24	2040	2080	2120	0	0.400848	0	0	0.43301	0	0	0.490009	0	0	0.383083	0
oil/gas	United States	Americas	Northern America	Sherwood H Smith Jr energy complex	1			199	operating	2001		GT	FO/NG					Duke Energy Progress LLC [100.0%]	Duke Energy Corp [100.0%]	34.8392	-79.7406	exact	Hamlet	Richmond		North Carolina	https://www.gem.wiki/Sherwood_H_Smith_Jr_energy_complex	L100000401885	G100000402783	US26441C2044	1	6729		23	2041	2081	2121	0	0	0.0259287	0	0	0.0259287	0	0	0.0326657	0	0	0.0326657
oil/gas	United States	Americas	Northern America	Sherwood H Smith Jr energy complex	2			199	operating	2001		GT	FO/NG					Duke Energy Progress LLC [100.0%]	Duke Energy Corp [100.0%]	34.8392	-79.7406	exact	Hamlet	Richmond		North Carolina	https://www.gem.wiki/Sherwood_H_Smith_Jr_energy_complex	L100000401885	G100000402784	US26441C2044	1	6729		23	2041	2081	2121	0	0	0.0259287	0	0	0.0259287	0	0	0.0326657	0	0	0.0326657
oil/gas	United States	Americas	Northern America	Sherwood H Smith Jr energy complex	3			199	operating	2001		GT	FO/NG					Duke Energy Progress LLC [100.0%]	Duke Energy Corp [100.0%]	34.8392	-79.7406	exact	Hamlet	Richmond		North Carolina	https://www.gem.wiki/Sherwood_H_Smith_Jr_energy_complex	L100000401885	G100000402785	US26441C2044	1	6729		23	2041	2081	2121	0	0	0.0259287	0	0	0.0259287	0	0	0.0326657	0	0	0.0326657
oil/gas	United States	Americas	Northern America	Sherwood H Smith Jr energy complex	4			199	operating	2001		GT	FO/NG					Duke Energy Progress LLC [100.0%]	Duke Energy Corp [100.0%]	34.8392	-79.7406	exact	Hamlet	Richmond		North Carolina	https://www.gem.wiki/Sherwood_H_Smith_Jr_energy_complex	L100000401885	G100000402786	US26441C2044	1	6729		23	2041	2081	2121	0	0	0.0259287	0	0	0.0259287	0	0	0.0326657	0	0	0.0326657
oil/gas	United States	Americas	Northern America	Sherwood H Smith Jr energy complex	6			199	operating	2002		GT	NG/FO					Duke Energy Progress LLC [100.0%]	Duke Energy Corp [100.0%]	34.8392	-79.7406	exact	Hamlet	Richmond		North Carolina	https://www.gem.wiki/Sherwood_H_Smith_Jr_energy_complex	L100000401885	G100000402787	US26441C2044	1	6729		22	2042	2082	2122	0	0.400848	0	0	0.43301	0	0	0.490009	0	0	0.383083	0
oil/gas	United States	Americas	Northern America	Sherwood H Smith Jr energy complex	CC1			594	operating	2002		CC	NG/FO					Duke Energy Progress LLC [100.0%]	Duke Energy Corp [100.0%]	34.8392	-79.7406	exact	Hamlet	Richmond		North Carolina	https://www.gem.wiki/Sherwood_H_Smith_Jr_energy_complex	L100000401885	G100000402172	US26441C2044	1	6729		22	2042	2082	2122	0	0.400848	0	0	0.43301	0	0	0.490009	0	0	0.383083	0
oil/gas	United States	Americas	Northern America	Sherwood H Smith Jr energy complex	CC2			654	operating	2011		CC	NG/FO					Duke Energy Progress LLC [100.0%]	Duke Energy Corp [100.0%]	34.8392	-79.7406	exact	Hamlet	Richmond		North Carolina	https://www.gem.wiki/Sherwood_H_Smith_Jr_energy_complex	L100000401885	G100000402173	US26441C2044	1	6729	6729	13	2051	2091	2131	0	0.400848	0	0	0.43301	0	0	0.490009	0	0	0.383083	0
oil/gas	United States	Americas	Northern America	Suwannee River power station	P1			66	operating	1980		GT	NG/FO					Duke Energy Florida LLC [100.0%]	Duke Energy Corp [100.0%]	30.3764	-83.1806	exact	Live Oak	Suwannee		Florida	https://www.gem.wiki/Suwannee_River_power_station	L100000401872	G100000402749	US26441C2044	1	593.7		44	2020	2060	2100	0	0.400848	0	0	0.43301	0	0	0.490009	0	0	0.383083	0
oil/gas	United States	Americas	Northern America	Suwannee River power station	P2			65.9	operating	1980		GT	FO					Duke Energy Florida LLC [100.0%]	Duke Energy Corp [100.0%]	30.3764	-83.1806	exact	Live Oak	Suwannee		Florida	https://www.gem.wiki/Suwannee_River_power_station	L100000401872	G100000414184	US26441C2044	1	593.7		44	2020	2060	2100	0	0	0.0259287	0	0	0.0259287	0	0	0.0326657	0	0	0.0326657
oil/gas	United States	Americas	Northern America	Suwannee River power station	P3			66	operating	1980		GT	NG/FO					Duke Energy Florida LLC [100.0%]	Duke Energy Corp [100.0%]	30.3764	-83.1806	exact	Live Oak	Suwannee		Florida	https://www.gem.wiki/Suwannee_River_power_station	L100000401872	G100000402750	US26441C2044	1	593.7	593.7	44	2020	2060	2100	0	0.400848	0	0	0.43301	0	0	0.490009	0	0	0.383083	0
oil/gas	United States	Americas	Northern America	Tiger Bay power station	G200			278	operating	1997		CC	NG					Duke Energy Florida LLC [100.0%]	Duke Energy Corp [100.0%]	27.7464	-81.8495	exact	Ft. Meade	Polk		Florida	https://www.gem.wiki/Tiger_Bay_power_station	L100000401873	G100000402164	US26441C2044	1	834	834	27	2037	2077	2117	0	0.400848	0	0	0.43301	0	0	0.490009	0	0	0.383083	0
oil/gas	United States	Americas	Northern America	University of Florida power station	P1			54	operating	1994		GT	NG					Duke Energy Florida LLC [100.0%]	Duke Energy Corp [100.0%]	29.6403	-82.3486	exact	Gainesville	Alachua		Florida	https://www.gem.wiki/University_of_Florida_power_station	L100000401874	G100000402751	US26441C2044	1	162	162	30	2034	2074	2114	0	0.400848	0	0	0.43301	0	0	0.490009	0	0	0.383083	0
oil/gas	United States	Americas	Northern America	Vermillion energy facility	CT1			87	operating	2000		GT	NG					Duke Energy Indiana LLC [62.5%]; Wabash Valley Power Association Inc [37.5%]	Duke Energy Corp [62.5%]	39.9223	-87.4464	exact	Cayuga	Vermillion		Indiana	https://www.gem.wiki/Vermillion_energy_facility	L100000401550	G100000402247	US26441C2044	0.625	2088		24	2040	2080	2120	0	0.400848	0	0	0.43301	0	0	0.490009	0	0	0.383083	0
oil/gas	United States	Americas	Northern America	Vermillion energy facility	CT2			87	operating	2000		GT	NG					Duke Energy Indiana LLC [62.5%]; Wabash Valley Power Association Inc [37.5%]	Duke Energy Corp [62.5%]	39.9223	-87.4464	exact	Cayuga	Vermillion		Indiana	https://www.gem.wiki/Vermillion_energy_facility	L100000401550	G100000402248	US26441C2044	0.625	2088		24	2040	2080	2120	0	0.400848	0	0	0.43301	0	0	0.490009	0	0	0.383083	0
oil/gas	United States	Americas	Northern America	Vermillion energy facility	CT3			87	operating	2000		GT	NG					Duke Energy Indiana LLC [62.5%]; Wabash Valley Power Association Inc [37.5%]	Duke Energy Corp [62.5%]	39.9223	-87.4464	exact	Cayuga	Vermillion		Indiana	https://www.gem.wiki/Vermillion_energy_facility	L100000401550	G100000402249	US26441C2044	0.625	2088		24	2040	2080	2120	0	0.400848	0	0	0.43301	0	0	0.490009	0	0	0.383083	0
oil/gas	United States	Americas	Northern America	Vermillion energy facility	CT4			87	operating	2000		GT	NG					Duke Energy Indiana LLC [62.5%]; Wabash Valley Power Association Inc [37.5%]	Duke Energy Corp [62.5%]	39.9223	-87.4464	exact	Cayuga	Vermillion		Indiana	https://www.gem.wiki/Vermillion_energy_facility	L100000401550	G100000402250	US26441C2044	0.625	2088		24	2040	2080	2120	0	0.400848	0	0	0.43301	0	0	0.490009	0	0	0.383083	0
oil/gas	United States	Americas	Northern America	Vermillion energy facility	CT5			87	operating	2000		GT	NG					Duke Energy Indiana LLC [62.5%]; Wabash Valley Power Association Inc [37.5%]	Duke Energy Corp [62.5%]	39.9223	-87.4464	exact	Cayuga	Vermillion		Indiana	https://www.gem.wiki/Vermillion_energy_facility	L100000401550	G100000402251	US26441C2044	0.625	2088		24	2040	2080	2120	0	0.400848	0	0	0.43301	0	0	0.490009	0	0	0.383083	0
oil/gas	United States	Americas	Northern America	Vermillion energy facility	CT6			87	operating	2000		GT	NG					Duke Energy Indiana LLC [62.5%]; Wabash Valley Power Association Inc [37.5%]	Duke Energy Corp [62.5%]	39.9223	-87.4464	exact	Cayuga	Vermillion		Indiana	https://www.gem.wiki/Vermillion_energy_facility	L100000401550	G100000402252	US26441C2044	0.625	2088		24	2040	2080	2120	0	0.400848	0	0	0.43301	0	0	0.490009	0	0	0.383083	0
oil/gas	United States	Americas	Northern America	Vermillion energy facility	CT7			87	operating	2000		GT	NG					Duke Energy Indiana LLC [62.5%]; Wabash Valley Power Association Inc [37.5%]	Duke Energy Corp [62.5%]	39.9223	-87.4464	exact	Cayuga	Vermillion		Indiana	https://www.gem.wiki/Vermillion_energy_facility	L100000401550	G100000402253	US26441C2044	0.625	2088		24	2040	2080	2120	0	0.400848	0	0	0.43301	0	0	0.490009	0	0	0.383083	0
oil/gas	United States	Americas	Northern America	Vermillion energy facility	CT8			87	operating	2000		GT	NG					Duke Energy Indiana LLC [62.5%]; Wabash Valley Power Association Inc [37.5%]	Duke Energy Corp [62.5%]	39.9223	-87.4464	exact	Cayuga	Vermillion		Indiana	https://www.gem.wiki/Vermillion_energy_facility	L100000401550	G100000402254	US26441C2044	0.625	2088	2088	24	2040	2080	2120	0	0.400848	0	0	0.43301	0	0	0.490009	0	0	0.383083	0
oil/gas	United States	Americas	Northern America	W.S. Lee Steam Station	3			163	retired	1958	2022	ST	NG					Duke Energy Carolinas LLC [100.0%]	Duke Energy Corp [100.0%]	34.6022	-82.435	exact	Williamston	Anderson		South Carolina	https://www.gem.wiki/W.S._Lee_Steam_Station	L100000104179	G100000402732	US26441C2044	1	3354		66	1998	2038	2078	0	0.400848	0	0	0.43301	0	0	0.490009	0	0	0.383083	0
oil/gas	United States	Americas	Northern America	W.S. Lee Steam Station	7			54	operating	2007		GT	NG/FO					Duke Energy Carolinas LLC [100.0%]	Duke Energy Corp [100.0%]	34.6022	-82.435	exact	Williamston	Anderson		South Carolina	https://www.gem.wiki/W.S._Lee_Steam_Station	L100000104179	G100000402733	US26441C2044	1	3354		17	2047	2087	2127	0	0.400848	0	0	0.43301	0	0	0.490009	0	0	0.383083	0
oil/gas	United States	Americas	Northern America	W.S. Lee Steam Station	8			54	operating	2007		GT	NG/FO					Duke Energy Carolinas LLC [100.0%]	Duke Energy Corp [100.0%]	34.6022	-82.435	exact	Williamston	Anderson		South Carolina	https://www.gem.wiki/W.S._Lee_Steam_Station	L100000104179	G100000402734	US26441C2044	1	3354		17	2047	2087	2127	0	0.400848	0	0	0.43301	0	0	0.490009	0	0	0.383083	0
oil/gas	United States	Americas	Northern America	W.S. Lee Steam Station	CC1			847	operating	2018		CC	NG					Duke Energy Carolinas LLC [100.0%]	Duke Energy Corp [100.0%]	34.6022	-82.435	exact	Williamston	Anderson		South Carolina	https://www.gem.wiki/W.S._Lee_Steam_Station	L100000104179	G100000401663	US26441C2044	1	3354	3354	6	2058	2098	2138	0	0.400848	0	0	0.43301	0	0	0.490009	0	0	0.383083	0
oil/gas	United States	Americas	Northern America	Wayne County power station	1			195	operating	2000		GT	NG/FO					Duke Energy Progress LLC [100.0%]	Duke Energy Corp [100.0%]	35.3758	-78.0981	exact	Goldsboro	Wayne		North Carolina	https://www.gem.wiki/Wayne_County_power_station	L100000401886	G100000402788	US26441C2044	1	2937		24	2040	2080	2120	0	0.400848	0	0	0.43301	0	0	0.490009	0	0	0.383083	0
oil/gas	United States	Americas	Northern America	Wayne County power station	2			195	operating	2000		GT	NG/FO					Duke Energy Progress LLC [100.0%]	Duke Energy Corp [100.0%]	35.3758	-78.0981	exact	Goldsboro	Wayne		North Carolina	https://www.gem.wiki/Wayne_County_power_station	L100000401886	G100000402789	US26441C2044	1	2937		24	2040	2080	2120	0	0.400848	0	0	0.43301	0	0	0.490009	0	0	0.383083	0
oil/gas	United States	Americas	Northern America	Wayne County power station	3			195	operating	2000		GT	NG/FO					Duke Energy Progress LLC [100.0%]	Duke Energy Corp [100.0%]	35.3758	-78.0981	exact	Goldsboro	Wayne		North Carolina	https://www.gem.wiki/Wayne_County_power_station	L100000401886	G100000402790	US26441C2044	1	2937		24	2040	2080	2120	0	0.400848	0	0	0.43301	0	0	0.490009	0	0	0.383083	0
oil/gas	United States	Americas	Northern America	Wayne County power station	4			195	operating	2000		GT	NG/FO					Duke Energy Progress LLC [100.0%]	Duke Energy Corp [100.0%]	35.3758	-78.0981	exact	Goldsboro	Wayne		North Carolina	https://www.gem.wiki/Wayne_County_power_station	L100000401886	G100000402791	US26441C2044	1	2937		24	2040	2080	2120	0	0.400848	0	0	0.43301	0	0	0.490009	0	0	0.383083	0
oil/gas	United States	Americas	Northern America	Wayne County power station	5			199	operating	2009		GT	NG/FO					Duke Energy Progress LLC [100.0%]	Duke Energy Corp [100.0%]	35.3758	-78.0981	exact	Goldsboro	Wayne		North Carolina	https://www.gem.wiki/Wayne_County_power_station	L100000401886	G100000402792	US26441C2044	1	2937	2937	15	2049	2089	2129	0	0.400848	0	0	0.43301	0	0	0.490009	0	0	0.383083	0
oil/gas	United States	Americas	Northern America	Wheatland generating facility	CTG1			125	operating	2000		GT	NG					Duke Energy Indiana LLC [100.0%]	Duke Energy Corp [100.0%]	38.6716	-87.2931	exact	Wheatland	Knox		Indiana	https://www.gem.wiki/Wheatland_generating_facility	L100000401879	G100000402764	US26441C2044	1	1500		24	2040	2080	2120	0	0.400848	0	0	0.43301	0	0	0.490009	0	0	0.383083	0
oil/gas	United States	Americas	Northern America	Wheatland generating facility	CTG2			125	operating	2000		GT	NG					Duke Energy Indiana LLC [100.0%]	Duke Energy Corp [100.0%]	38.6716	-87.2931	exact	Wheatland	Knox		Indiana	https://www.gem.wiki/Wheatland_generating_facility	L100000401879	G100000402765	US26441C2044	1	1500		24	2040	2080	2120	0	0.400848	0	0	0.43301	0	0	0.490009	0	0	0.383083	0
oil/gas	United States	Americas	Northern America	Wheatland generating facility	CTG3			125	operating	2000		GT	NG					Duke Energy Indiana LLC [100.0%]	Duke Energy Corp [100.0%]	38.6716	-87.2931	exact	Wheatland	Knox		Indiana	https://www.gem.wiki/Wheatland_generating_facility	L100000401879	G100000402766	US26441C2044	1	1500		24	2040	2080	2120	0	0.400848	0	0	0.43301	0	0	0.490009	0	0	0.383083	0
oil/gas	United States	Americas	Northern America	Wheatland generating facility	CTG4			125	operating	2000		GT	NG					Duke Energy Indiana LLC [100.0%]	Duke Energy Corp [100.0%]	38.6716	-87.2931	exact	Wheatland	Knox		Indiana	https://www.gem.wiki/Wheatland_generating_facility	L100000401879	G100000402767	US26441C2044	1	1500	1500	24	2040	2080	2120	0	0.400848	0	0	0.43301	0	0	0.490009	0	0	0.383083	0
oil/gas	United States	Americas	Northern America	Woodsdale power station	GT2			95	operating	1992		GT	NG/FO					Duke Energy Kentucky Inc [100.0%]	Duke Energy Corp [100.0%]	39.4492	-84.4611	exact	Trenton	Butler		Ohio	https://www.gem.wiki/Woodsdale_power_station	L100000401880	G100000402769	US26441C2044	1	1710		32	2032	2072	2112	0	0.400848	0	0	0.43301	0	0	0.490009	0	0	0.383083	0
oil/gas	United States	Americas	Northern America	Woodsdale power station	GT3			95	operating	1992		GT	NG/FO					Duke Energy Kentucky Inc [100.0%]	Duke Energy Corp [100.0%]	39.4492	-84.4611	exact	Trenton	Butler		Ohio	https://www.gem.wiki/Woodsdale_power_station	L100000401880	G100000402770	US26441C2044	1	1710		32	2032	2072	2112	0	0.400848	0	0	0.43301	0	0	0.490009	0	0	0.383083	0
oil/gas	United States	Americas	Northern America	Woodsdale power station	GT4			95	operating	1992		GT	NG/FO					Duke Energy Kentucky Inc [100.0%]	Duke Energy Corp [100.0%]	39.4492	-84.4611	exact	Trenton	Butler		Ohio	https://www.gem.wiki/Woodsdale_power_station	L100000401880	G100000402771	US26441C2044	1	1710		32	2032	2072	2112	0	0.400848	0	0	0.43301	0	0	0.490009	0	0	0.383083	0
oil/gas	United States	Americas	Northern America	Woodsdale power station	GT5			95	operating	1992		GT	NG/FO					Duke Energy Kentucky Inc [100.0%]	Duke Energy Corp [100.0%]	39.4492	-84.4611	exact	Trenton	Butler		Ohio	https://www.gem.wiki/Woodsdale_power_station	L100000401880	G100000402772	US26441C2044	1	1710		32	2032	2072	2112	0	0.400848	0	0	0.43301	0	0	0.490009	0	0	0.383083	0
oil/gas	United States	Americas	Northern America	Woodsdale power station	GT6			95	operating	1992		GT	NG/FO					Duke Energy Kentucky Inc [100.0%]	Duke Energy Corp [100.0%]	39.4492	-84.4611	exact	Trenton	Butler		Ohio	https://www.gem.wiki/Woodsdale_power_station	L100000401880	G100000402773	US26441C2044	1	1710		32	2032	2072	2112	0	0.400848	0	0	0.43301	0	0	0.490009	0	0	0.383083	0
oil/gas	United States	Americas	Northern America	Woodsdale power station	GT1			95	operating	1993		GT	NG/FO					Duke Energy Kentucky Inc [100.0%]	Duke Energy Corp [100.0%]	39.4492	-84.4611	exact	Trenton	Butler		Ohio	https://www.gem.wiki/Woodsdale_power_station	L100000401880	G100000402768	US26441C2044	1	1710	1710	31	2033	2073	2113	0	0.400848	0	0	0.43301	0	0	0.490009	0	0	0.383083	0
																																						0	0	0
Type	Country/area	Region	Subregion	Plant / Project name	Unit / Phase name	Plant / Project name (local)	Plant / Project name (other)	Capacity (MW)	Status	Start year	Retired year	Technology	Fuel	Country/area 1 (hydropower only)	Country/area 2 (hydropower only)	Country/area 1 Capacity (MW) (hydropower only)	Country/area 2 Capacity (MW) (hydropower only)	Owner	Parent	Latitude	Longitude	Location accuracy	City	Local area (taluk, county)	Major area (prefecture, district)	Subnational unit (state, province)	GEM.Wiki URL	GEM location ID	GEM unit/phase ID	CompISIN	Ownership	Plant capacity	Plant capacity	Age	Reinvestment year	Reinvestment year	Reinvestment year	2020	2021	2022	2023	2024	2025	2026	2027	2028	2029	2030	2031
coal	United States	Americas	Northern America	Belews Creek Steam Station	Unit 1			1080	operating	1974	2039	supercritical	bituminous					Duke Energy Carolinas [100%]	Duke Energy Corp [100.0%]	36.2825	-80.0585	exact	Walnut Cove	Stokes		North Carolina	https://www.gem.wiki/Belews_Creek_Steam_Station	L100000104072	G100000100736	US26441C2044	1	6480		50	2014	2054	2094	3.19974e+06	3.29307e+06	2.62004e+06	2.4421e+06	2.88873e+06	2.88873e+06	2.88873e+06	2.88873e+06	2.88873e+06	2.88873e+06	2.88873e+06	2.88873e+06
coal	United States	Americas	Northern America	Belews Creek Steam Station	Unit 2			1080	operating	1975	2039	supercritical	bituminous					Duke Energy Carolinas [100%]	Duke Energy Corp [100.0%]	36.2825	-80.0585	exact	Walnut Cove	Stokes		North Carolina	https://www.gem.wiki/Belews_Creek_Steam_Station	L100000104072	G100000100737	US26441C2044	1	6480	6480	49	2015	2055	2095	3.19974e+06	3.29307e+06	2.62004e+06	2.4421e+06	2.88873e+06	2.88873e+06	2.88873e+06	2.88873e+06	2.88873e+06	2.88873e+06	2.88873e+06	2.88873e+06
coal	United States	Americas	Northern America	Cayuga Generating Station	Unit 1			531	operating	1970	2027	subcritical	bituminous					Duke Energy Indiana [100%]	Duke Energy Corp [100.0%]	39.9233	-87.4274	exact	Cayuga	Vermillion		Indiana	https://www.gem.wiki/Cayuga_Generating_Station	L100000103880	G100000101246	US26441C2044	1	3525		54	2010	2050	2090	1.5732e+06	1.61909e+06	1.28818e+06	1.2007e+06	1.42029e+06	1.42029e+06	1.42029e+06	1.42029e+06	1.42029e+06	1.42029e+06	1.42029e+06	1.42029e+06
coal	United States	Americas	Northern America	Cayuga Generating Station	Unit 2			531	operating	1972	2027	subcritical	bituminous					Duke Energy Indiana [100%]	Duke Energy Corp [100.0%]	39.9233	-87.4274	exact	Cayuga	Vermillion		Indiana	https://www.gem.wiki/Cayuga_Generating_Station	L100000103880	G100000101247	US26441C2044	1	3525	3525	52	2012	2052	2092	1.5732e+06	1.61909e+06	1.28818e+06	1.2007e+06	1.42029e+06	1.42029e+06	1.42029e+06	1.42029e+06	1.42029e+06	1.42029e+06	1.42029e+06	1.42029e+06
coal	United States	Americas	Northern America	Crystal River Energy Complex	Unit 4			739.2	operating	1982		subcritical	bituminous					Duke Energy Florida [100%]	Duke Energy Corp [100.0%]	28.957	-82.7006	exact	Crystal River	Citrus		Florida	https://www.gem.wiki/Crystal_River_Energy_Complex	L100000103825	G100000101841	US26441C2044	1	10345.2		42	2022	2062	2102	2.19004e+06	2.25392e+06	1.79327e+06	1.67148e+06	1.97718e+06	1.97718e+06	1.97718e+06	1.97718e+06	1.97718e+06	1.97718e+06	1.97718e+06	1.97718e+06
coal	United States	Americas	Northern America	Crystal River Energy Complex	Unit 5			739.2	operating	1984		subcritical	bituminous					Duke Energy Florida [100%]	Duke Energy Corp [100.0%]	28.957	-82.7006	exact	Crystal River	Citrus		Florida	https://www.gem.wiki/Crystal_River_Energy_Complex	L100000103825	G100000101842	US26441C2044	1	10345.2	10345.2	40	2024	2064	2104	2.19004e+06	2.25392e+06	1.79327e+06	1.67148e+06	1.97718e+06	1.97718e+06	1.97718e+06	1.97718e+06	1.97718e+06	1.97718e+06	1.97718e+06	1.97718e+06
coal	United States	Americas	Northern America	East Bend Generating Station	Unit 2			669.3	operating	1981		subcritical	bituminous					Duke Energy Kentucky [100%]	Duke Energy Corp [100.0%]	38.9042	-84.8513	exact	Rabbit Hash	Boone		Kentucky	https://www.gem.wiki/East_Bend_Generating_Station	L100000103938	G100000102546	US26441C2044	1	2007.9	2007.9	43	2021	2061	2101	1.98295e+06	2.04079e+06	1.62369e+06	1.51342e+06	1.79021e+06	1.79021e+06	1.79021e+06	1.79021e+06	1.79021e+06	1.79021e+06	1.79021e+06	1.79021e+06
coal	United States	Americas	Northern America	Edwardsport power station	Unit 1			236.5	operating	2013		IGCC	unknown					Duke Energy Indiana [100%]	Duke Energy Corp [100.0%]	38.7975	-87.2505	exact	Edwardsport			Indiana	https://www.gem.wiki/Edwardsport_power_station	L100000103885	G100000102595	US26441C2044	1	2413.5		11	2053	2093	2133	724384	745514	593147	552863	653977	653977	653977	653977	653977	653977	653977	653977
coal	United States	Americas	Northern America	Edwardsport power station	Unit 2			236.5	operating	2013		IGCC	unknown					Duke Energy Indiana [100%]	Duke Energy Corp [100.0%]	38.7975	-87.2505	exact	Edwardsport			Indiana	https://www.gem.wiki/Edwardsport_power_station	L100000103885	G100000115937	US26441C2044	1	2413.5		11	2053	2093	2133	724384	745514	593147	552863	653977	653977	653977	653977	653977	653977	653977	653977
coal	United States	Americas	Northern America	Edwardsport power station	Unit 3			331.5	operating	2013		IGCC	unknown					Duke Energy Indiana [100%]	Duke Energy Corp [100.0%]	38.7975	-87.2505	exact	Edwardsport			Indiana	https://www.gem.wiki/Edwardsport_power_station	L100000103885	G100000115938	US26441C2044	1	2413.5	2413.5	11	2053	2093	2133	1.01536e+06	1.04498e+06	831409	774944	916674	916674	916674	916674	916674	916674	916674	916674
coal	United States	Americas	Northern America	G.G. Allen Steam Plant	Unit 2			165	retired	1957	2021	subcritical	bituminous					Duke Energy Carolinas [100%]	Duke Energy Corp [100.0%]	35.1903	-81.0083	exact	Belmont	Gaston		North Carolina	https://www.gem.wiki/G.G._Allen_Steam_Plant	L100000104079	G100000102876	US26441C2044	1	3465		67	1997	2037	2077	488848	0	0	0	0	0	0	0	0	0	0	0
[truncated: 340 more rows]
[truncated: 28 more columns]
