# Supplementary material for: Assessing corporate transition plans using a production asset-based planning approach
Source: Research Square preprint supplement (doi:10.21203/rs.3.rs-5245457/v1), 2024-12-09
Supplement: Supplementary file 33 [file 9 Eskom.xlsx]

## Sheet: Eskom_all
Type	Country/area	Region	Subregion	Plant / Project name	Unit / Phase name	Plant / Project name (local)	Plant / Project name (other)	Capacity (MW)	Status	Start year	Retired year	Technology	Fuel	Country/area 1 (hydropower only)	Country/area 2 (hydropower only)	Country/area 1 Capacity (MW) (hydropower only)	Country/area 2 Capacity (MW) (hydropower only)	Owner	Parent	Latitude	Longitude	Location accuracy	City	Local area (taluk, county)	Major area (prefecture, district)	Subnational unit (state, province)	GEM.Wiki URL	GEM location ID	GEM unit/phase ID	CompISIN	Ownership	Plant capacity	Plant capacity	Age	Reinvestment year	Reinvestment year	Reinvestment year
coal	South Africa	Africa	Sub-Saharan Africa	Arnot power station	Unit 1			370	operating	1972	2026	subcritical	bituminous					Eskom Holdings SOC [100%]	Eskom Holdings SOC [100.0%]	-25.9438	29.792	exact	Rietkuil		Nkangala	Mpumalanga	https://www.gem.wiki/Arnot_power_station	L100000103438	G100000100348	ZAG000066697	1	2352		52	2012	2052	2092
coal	South Africa	Africa	Sub-Saharan Africa	Arnot power station	Unit 2			390	operating	1971	2026	subcritical	bituminous					Eskom Holdings SOC [100%]	Eskom Holdings SOC [100.0%]	-25.9438	29.792	exact	Rietkuil		Nkangala	Mpumalanga	https://www.gem.wiki/Arnot_power_station	L100000103438	G100000100349	ZAG000066697	1	2352		53	2011	2051	2091
coal	South Africa	Africa	Sub-Saharan Africa	Arnot power station	Unit 3			396	operating	1971	2026	subcritical	bituminous					Eskom Holdings SOC [100%]	Eskom Holdings SOC [100.0%]	-25.9438	29.792	exact	Rietkuil		Nkangala	Mpumalanga	https://www.gem.wiki/Arnot_power_station	L100000103438	G100000100350	ZAG000066697	1	2352		53	2011	2051	2091
coal	South Africa	Africa	Sub-Saharan Africa	Arnot power station	Unit 4			396	operating	1973	2027	subcritical	bituminous					Eskom Holdings SOC [100%]	Eskom Holdings SOC [100.0%]	-25.9438	29.792	exact	Rietkuil		Nkangala	Mpumalanga	https://www.gem.wiki/Arnot_power_station	L100000103438	G100000100351	ZAG000066697	1	2352		51	2013	2053	2093
coal	South Africa	Africa	Sub-Saharan Africa	Arnot power station	Unit 5			400	operating	1974	2029	subcritical	bituminous					Eskom Holdings SOC [100%]	Eskom Holdings SOC [100.0%]	-25.9438	29.792	exact	Rietkuil		Nkangala	Mpumalanga	https://www.gem.wiki/Arnot_power_station	L100000103438	G100000100352	ZAG000066697	1	2352		50	2014	2054	2094
coal	South Africa	Africa	Sub-Saharan Africa	Arnot power station	Unit 6			400	operating	1975	2029	subcritical	bituminous					Eskom Holdings SOC [100%]	Eskom Holdings SOC [100.0%]	-25.9438	29.792	exact	Rietkuil		Nkangala	Mpumalanga	https://www.gem.wiki/Arnot_power_station	L100000103438	G100000100353	ZAG000066697	1	2352	2352	49	2015	2055	2095
coal	South Africa	Africa	Sub-Saharan Africa	Camden power station	Unit 1			200	operating	1968	2025	subcritical	bituminous					Eskom Holdings SOC [100%]	Eskom Holdings SOC [100.0%]	-26.6215	30.0901	exact	Camden		Gert Sibande	Mpumalanga	https://www.gem.wiki/Camden_power_station	L100000103439	G100000101168	ZAG000066697	1	1600		56	2008	2048	2088
coal	South Africa	Africa	Sub-Saharan Africa	Camden power station	Unit 2			200	operating	1967	2025	subcritical	bituminous					Eskom Holdings SOC [100%]	Eskom Holdings SOC [100.0%]	-26.6215	30.0901	exact	Camden		Gert Sibande	Mpumalanga	https://www.gem.wiki/Camden_power_station	L100000103439	G100000101169	ZAG000066697	1	1600		57	2007	2047	2087
coal	South Africa	Africa	Sub-Saharan Africa	Camden power station	Unit 3			200	operating	1967	2025	subcritical	bituminous					Eskom Holdings SOC [100%]	Eskom Holdings SOC [100.0%]	-26.6215	30.0901	exact	Camden		Gert Sibande	Mpumalanga	https://www.gem.wiki/Camden_power_station	L100000103439	G100000101170	ZAG000066697	1	1600		57	2007	2047	2087
coal	South Africa	Africa	Sub-Saharan Africa	Camden power station	Unit 4			200	operating	1967	2025	subcritical	bituminous					Eskom Holdings SOC [100%]	Eskom Holdings SOC [100.0%]	-26.6215	30.0901	exact	Camden		Gert Sibande	Mpumalanga	https://www.gem.wiki/Camden_power_station	L100000103439	G100000101171	ZAG000066697	1	1600		57	2007	2047	2087
coal	South Africa	Africa	Sub-Saharan Africa	Camden power station	Unit 5			200	operating	1967	2025	subcritical	bituminous					Eskom Holdings SOC [100%]	Eskom Holdings SOC [100.0%]	-26.6215	30.0901	exact	Camden		Gert Sibande	Mpumalanga	https://www.gem.wiki/Camden_power_station	L100000103439	G100000101172	ZAG000066697	1	1600		57	2007	2047	2087
coal	South Africa	Africa	Sub-Saharan Africa	Camden power station	Unit 6			200	operating	1968	2025	subcritical	bituminous					Eskom Holdings SOC [100%]	Eskom Holdings SOC [100.0%]	-26.6215	30.0901	exact	Camden		Gert Sibande	Mpumalanga	https://www.gem.wiki/Camden_power_station	L100000103439	G100000101173	ZAG000066697	1	1600		56	2008	2048	2088
coal	South Africa	Africa	Sub-Saharan Africa	Camden power station	Unit 7			200	operating	1969	2025	subcritical	bituminous					Eskom Holdings SOC [100%]	Eskom Holdings SOC [100.0%]	-26.6215	30.0901	exact	Camden		Gert Sibande	Mpumalanga	https://www.gem.wiki/Camden_power_station	L100000103439	G100000101174	ZAG000066697	1	1600		55	2009	2049	2089
coal	South Africa	Africa	Sub-Saharan Africa	Camden power station	Unit 8			200	operating	1969	2025	subcritical	bituminous					Eskom Holdings SOC [100%]	Eskom Holdings SOC [100.0%]	-26.6215	30.0901	exact	Camden		Gert Sibande	Mpumalanga	https://www.gem.wiki/Camden_power_station	L100000103439	G100000101175	ZAG000066697	1	1600	1600	55	2009	2049	2089
coal	South Africa	Africa	Sub-Saharan Africa	Coal-3 power station	--			1500	cancelled			unknown	bituminous					Eskom Holdings SOC [100%]	Eskom Holdings SOC [100.0%]	-24.075	28.1417	approximate	Waterberg		Waterberg District	Limpopo	https://www.gem.wiki/Coal-3_power_station	L100000103454	G100000101627	ZAG000066697	1	1500	1500	-99	40	80	120
coal	South Africa	Africa	Sub-Saharan Africa	Duvha power station	Unit 1			600	operating	1980	2031	subcritical	bituminous					Eskom Holdings SOC [100%]	Eskom Holdings SOC [100.0%]	-25.9613	29.3397	exact	Witbank		Nkangala	Mpumalanga	https://www.gem.wiki/Duvha_power_station	L100000103440	G100000102524	ZAG000066697	1	3600		44	2020	2060	2100
coal	South Africa	Africa	Sub-Saharan Africa	Duvha power station	Unit 2			600	operating	1980	2031	subcritical	bituminous					Eskom Holdings SOC [100%]	Eskom Holdings SOC [100.0%]	-25.9613	29.3397	exact	Witbank		Nkangala	Mpumalanga	https://www.gem.wiki/Duvha_power_station	L100000103440	G100000102525	ZAG000066697	1	3600		44	2020	2060	2100
coal	South Africa	Africa	Sub-Saharan Africa	Duvha power station	Unit 3			600	mothballed	1981	2032	subcritical	bituminous					Eskom Holdings SOC [100%]	Eskom Holdings SOC [100.0%]	-25.9613	29.3397	exact	Witbank		Nkangala	Mpumalanga	https://www.gem.wiki/Duvha_power_station	L100000103440	G100000102526	ZAG000066697	1	3600		43	2021	2061	2101
coal	South Africa	Africa	Sub-Saharan Africa	Duvha power station	Unit 4			600	operating	1982	2033	subcritical	bituminous					Eskom Holdings SOC [100%]	Eskom Holdings SOC [100.0%]	-25.9613	29.3397	exact	Witbank		Nkangala	Mpumalanga	https://www.gem.wiki/Duvha_power_station	L100000103440	G100000102527	ZAG000066697	1	3600		42	2022	2062	2102
coal	South Africa	Africa	Sub-Saharan Africa	Duvha power station	Unit 5			600	operating	1983	2033	subcritical	bituminous					Eskom Holdings SOC [100%]	Eskom Holdings SOC [100.0%]	-25.9613	29.3397	exact	Witbank		Nkangala	Mpumalanga	https://www.gem.wiki/Duvha_power_station	L100000103440	G100000102528	ZAG000066697	1	3600		41	2023	2063	2103
coal	South Africa	Africa	Sub-Saharan Africa	Duvha power station	Unit 6			600	operating	1984	2034	subcritical	bituminous					Eskom Holdings SOC [100%]	Eskom Holdings SOC [100.0%]	-25.9613	29.3397	exact	Witbank		Nkangala	Mpumalanga	https://www.gem.wiki/Duvha_power_station	L100000103440	G100000102529	ZAG000066697	1	3600	3600	40	2024	2064	2104
coal	South Africa	Africa	Sub-Saharan Africa	Grootvlei power station	Unit 1			200	operating	1973	2027	subcritical	bituminous					Eskom Holdings SOC [100%]	Eskom Holdings SOC [100.0%]	-26.7685	28.4978	exact	Grootvlei		Gert Sibande	Mpumalanga	https://www.gem.wiki/Grootvlei_power_station	L100000103441	G100000103136	ZAG000066697	1	1190		51	2013	2053	2093
coal	South Africa	Africa	Sub-Saharan Africa	Grootvlei power station	Unit 2			200	operating	1970	2027	subcritical	bituminous					Eskom Holdings SOC [100%]	Eskom Holdings SOC [100.0%]	-26.7685	28.4978	exact	Grootvlei		Gert Sibande	Mpumalanga	https://www.gem.wiki/Grootvlei_power_station	L100000103441	G100000103137	ZAG000066697	1	1190		54	2010	2050	2090
coal	South Africa	Africa	Sub-Saharan Africa	Grootvlei power station	Unit 3			200	operating	1969	2027	subcritical	bituminous					Eskom Holdings SOC [100%]	Eskom Holdings SOC [100.0%]	-26.7685	28.4978	exact	Grootvlei		Gert Sibande	Mpumalanga	https://www.gem.wiki/Grootvlei_power_station	L100000103441	G100000103138	ZAG000066697	1	1190		55	2009	2049	2089
coal	South Africa	Africa	Sub-Saharan Africa	Grootvlei power station	Unit 4			200	mothballed	1969	2025	subcritical	bituminous					Eskom Holdings SOC [100%]	Eskom Holdings SOC [100.0%]	-26.7685	28.4978	exact	Grootvlei		Gert Sibande	Mpumalanga	https://www.gem.wiki/Grootvlei_power_station	L100000103441	G100000103139	ZAG000066697	1	1190		55	2009	2049	2089
coal	South Africa	Africa	Sub-Saharan Africa	Grootvlei power station	Unit 5			190	mothballed	1971	2025	subcritical	bituminous					Eskom Holdings SOC [100%]	Eskom Holdings SOC [100.0%]	-26.7685	28.4978	exact	Grootvlei		Gert Sibande	Mpumalanga	https://www.gem.wiki/Grootvlei_power_station	L100000103441	G100000103140	ZAG000066697	1	1190		53	2011	2051	2091
coal	South Africa	Africa	Sub-Saharan Africa	Grootvlei power station	Unit 6			200	mothballed	1977	2025	subcritical	bituminous					Eskom Holdings SOC [100%]	Eskom Holdings SOC [100.0%]	-26.7685	28.4978	exact	Grootvlei		Gert Sibande	Mpumalanga	https://www.gem.wiki/Grootvlei_power_station	L100000103441	G100000103141	ZAG000066697	1	1190	1190	47	2017	2057	2097
coal	South Africa	Africa	Sub-Saharan Africa	Hendrina power station	Unit 1			200	mothballed	1972	2025	subcritical	bituminous					Eskom Holdings SOC [100%]	Eskom Holdings SOC [100.0%]	-26.032	29.6016	exact	Pullens Hope		Nkangala	Mpumalanga	https://www.gem.wiki/Hendrina_power_station	L100000103442	G100000103806	ZAG000066697	1	2000		52	2012	2052	2092
coal	South Africa	Africa	Sub-Saharan Africa	Hendrina power station	Unit 10			200	operating	1977	2025	subcritical	bituminous					Eskom Holdings SOC [100%]	Eskom Holdings SOC [100.0%]	-26.032	29.6016	exact	Pullens Hope		Nkangala	Mpumalanga	https://www.gem.wiki/Hendrina_power_station	L100000103442	G100000103807	ZAG000066697	1	2000		47	2017	2057	2097
coal	South Africa	Africa	Sub-Saharan Africa	Hendrina power station	Unit 2			200	operating	1971	2025	subcritical	bituminous					Eskom Holdings SOC [100%]	Eskom Holdings SOC [100.0%]	-26.032	29.6016	exact	Pullens Hope		Nkangala	Mpumalanga	https://www.gem.wiki/Hendrina_power_station	L100000103442	G100000103808	ZAG000066697	1	2000		53	2011	2051	2091
coal	South Africa	Africa	Sub-Saharan Africa	Hendrina power station	Unit 3			200	mothballed	1970	2025	subcritical	bituminous					Eskom Holdings SOC [100%]	Eskom Holdings SOC [100.0%]	-26.032	29.6016	exact	Pullens Hope		Nkangala	Mpumalanga	https://www.gem.wiki/Hendrina_power_station	L100000103442	G100000103809	ZAG000066697	1	2000		54	2010	2050	2090
coal	South Africa	Africa	Sub-Saharan Africa	Hendrina power station	Unit 4			200	operating	1970	2025	subcritical	bituminous					Eskom Holdings SOC [100%]	Eskom Holdings SOC [100.0%]	-26.032	29.6016	exact	Pullens Hope		Nkangala	Mpumalanga	https://www.gem.wiki/Hendrina_power_station	L100000103442	G100000103810	ZAG000066697	1	2000		54	2010	2050	2090
coal	South Africa	Africa	Sub-Saharan Africa	Hendrina power station	Unit 5			200	operating	1971	2025	subcritical	bituminous					Eskom Holdings SOC [100%]	Eskom Holdings SOC [100.0%]	-26.032	29.6016	exact	Pullens Hope		Nkangala	Mpumalanga	https://www.gem.wiki/Hendrina_power_station	L100000103442	G100000103811	ZAG000066697	1	2000		53	2011	2051	2091
coal	South Africa	Africa	Sub-Saharan Africa	Hendrina power station	Unit 6			200	operating	1973	2025	subcritical	bituminous					Eskom Holdings SOC [100%]	Eskom Holdings SOC [100.0%]	-26.032	29.6016	exact	Pullens Hope		Nkangala	Mpumalanga	https://www.gem.wiki/Hendrina_power_station	L100000103442	G100000103812	ZAG000066697	1	2000		51	2013	2053	2093
coal	South Africa	Africa	Sub-Saharan Africa	Hendrina power station	Unit 7			200	operating	1974	2025	subcritical	bituminous					Eskom Holdings SOC [100%]	Eskom Holdings SOC [100.0%]	-26.032	29.6016	exact	Pullens Hope		Nkangala	Mpumalanga	https://www.gem.wiki/Hendrina_power_station	L100000103442	G100000103813	ZAG000066697	1	2000		50	2014	2054	2094
coal	South Africa	Africa	Sub-Saharan Africa	Hendrina power station	Unit 8			200	operating	1975	2025	subcritical	bituminous					Eskom Holdings SOC [100%]	Eskom Holdings SOC [100.0%]	-26.032	29.6016	exact	Pullens Hope		Nkangala	Mpumalanga	https://www.gem.wiki/Hendrina_power_station	L100000103442	G100000103814	ZAG000066697	1	2000		49	2015	2055	2095
coal	South Africa	Africa	Sub-Saharan Africa	Hendrina power station	Unit 9			200	mothballed	1976	2025	subcritical	bituminous					Eskom Holdings SOC [100%]	Eskom Holdings SOC [100.0%]	-26.032	29.6016	exact	Pullens Hope		Nkangala	Mpumalanga	https://www.gem.wiki/Hendrina_power_station	L100000103442	G100000103815	ZAG000066697	1	2000	2000	48	2016	2056	2096
coal	South Africa	Africa	Sub-Saharan Africa	Kendal power station	Unit 1			686	operating	1988	2038	subcritical	bituminous					Eskom Holdings SOC [100%]	Eskom Holdings SOC [100.0%]	-26.0903	28.9688	exact	Kendal		Nkangala	Mpumalanga	https://www.gem.wiki/Kendal_power_station	L100000103443	G100000105663	ZAG000066697	1	4116		36	2028	2068	2108
coal	South Africa	Africa	Sub-Saharan Africa	Kendal power station	Unit 2			686	operating	1989	2039	subcritical	bituminous					Eskom Holdings SOC [100%]	Eskom Holdings SOC [100.0%]	-26.0903	28.9688	exact	Kendal		Nkangala	Mpumalanga	https://www.gem.wiki/Kendal_power_station	L100000103443	G100000105664	ZAG000066697	1	4116		35	2029	2069	2109
coal	South Africa	Africa	Sub-Saharan Africa	Kendal power station	Unit 3			686	operating	1990	2040	subcritical	bituminous					Eskom Holdings SOC [100%]	Eskom Holdings SOC [100.0%]	-26.0903	28.9688	exact	Kendal		Nkangala	Mpumalanga	https://www.gem.wiki/Kendal_power_station	L100000103443	G100000105665	ZAG000066697	1	4116		34	2030	2070	2110
coal	South Africa	Africa	Sub-Saharan Africa	Kendal power station	Unit 4			686	operating	1991	2041	subcritical	bituminous					Eskom Holdings SOC [100%]	Eskom Holdings SOC [100.0%]	-26.0903	28.9688	exact	Kendal		Nkangala	Mpumalanga	https://www.gem.wiki/Kendal_power_station	L100000103443	G100000105666	ZAG000066697	1	4116		33	2031	2071	2111
coal	South Africa	Africa	Sub-Saharan Africa	Kendal power station	Unit 5			686	operating	1992	2042	subcritical	bituminous					Eskom Holdings SOC [100%]	Eskom Holdings SOC [100.0%]	-26.0903	28.9688	exact	Kendal		Nkangala	Mpumalanga	https://www.gem.wiki/Kendal_power_station	L100000103443	G100000105667	ZAG000066697	1	4116		32	2032	2072	2112
coal	South Africa	Africa	Sub-Saharan Africa	Kendal power station	Unit 6			686	operating	1993	2043	subcritical	bituminous					Eskom Holdings SOC [100%]	Eskom Holdings SOC [100.0%]	-26.0903	28.9688	exact	Kendal		Nkangala	Mpumalanga	https://www.gem.wiki/Kendal_power_station	L100000103443	G100000105668	ZAG000066697	1	4116	4116	31	2033	2073	2113
coal	South Africa	Africa	Sub-Saharan Africa	Komati power station	Unit 1			100	retired	1961	2022	subcritical	bituminous					Eskom Holdings SOC [100%]	Eskom Holdings SOC [100.0%]	-26.0908	29.4745	exact	Middleburg			Mpumalanga	https://www.gem.wiki/Komati_power_station	L100000103446	G100000105828	ZAG000066697	1	1000		63	2001	2041	2081
coal	South Africa	Africa	Sub-Saharan Africa	Komati power station	Unit 2			100	retired	1962	2022	subcritical	bituminous					Eskom Holdings SOC [100%]	Eskom Holdings SOC [100.0%]	-26.0908	29.4745	exact	Middleburg			Mpumalanga	https://www.gem.wiki/Komati_power_station	L100000103446	G100000105829	ZAG000066697	1	1000		62	2002	2042	2082
coal	South Africa	Africa	Sub-Saharan Africa	Komati power station	Unit 3			100	retired	1962	2022	subcritical	bituminous					Eskom Holdings SOC [100%]	Eskom Holdings SOC [100.0%]	-26.0908	29.4745	exact	Middleburg			Mpumalanga	https://www.gem.wiki/Komati_power_station	L100000103446	G100000105830	ZAG000066697	1	1000		62	2002	2042	2082
coal	South Africa	Africa	Sub-Saharan Africa	Komati power station	Unit 4			100	retired	1963	2022	subcritical	bituminous					Eskom Holdings SOC [100%]	Eskom Holdings SOC [100.0%]	-26.0908	29.4745	exact	Middleburg			Mpumalanga	https://www.gem.wiki/Komati_power_station	L100000103446	G100000105831	ZAG000066697	1	1000		61	2003	2043	2083
coal	South Africa	Africa	Sub-Saharan Africa	Komati power station	Unit 5			100	retired	1963	2022	subcritical	bituminous					Eskom Holdings SOC [100%]	Eskom Holdings SOC [100.0%]	-26.0908	29.4745	exact	Middleburg			Mpumalanga	https://www.gem.wiki/Komati_power_station	L100000103446	G100000105832	ZAG000066697	1	1000		61	2003	2043	2083
coal	South Africa	Africa	Sub-Saharan Africa	Komati power station	Unit 6			125	retired	1964	2022	subcritical	bituminous					Eskom Holdings SOC [100%]	Eskom Holdings SOC [100.0%]	-26.0908	29.4745	exact	Middleburg			Mpumalanga	https://www.gem.wiki/Komati_power_station	L100000103446	G100000105833	ZAG000066697	1	1000		60	2004	2044	2084
coal	South Africa	Africa	Sub-Saharan Africa	Komati power station	Unit 7			125	retired	1964	2022	subcritical	bituminous					Eskom Holdings SOC [100%]	Eskom Holdings SOC [100.0%]	-26.0908	29.4745	exact	Middleburg			Mpumalanga	https://www.gem.wiki/Komati_power_station	L100000103446	G100000105834	ZAG000066697	1	1000		60	2004	2044	2084
coal	South Africa	Africa	Sub-Saharan Africa	Komati power station	Unit 8			125	retired	1964	2022	subcritical	bituminous					Eskom Holdings SOC [100%]	Eskom Holdings SOC [100.0%]	-26.0908	29.4745	exact	Middleburg			Mpumalanga	https://www.gem.wiki/Komati_power_station	L100000103446	G100000105835	ZAG000066697	1	1000		60	2004	2044	2084
coal	South Africa	Africa	Sub-Saharan Africa	Komati power station	Unit 9			125	retired	1964	2022	subcritical	bituminous					Eskom Holdings SOC [100%]	Eskom Holdings SOC [100.0%]	-26.0908	29.4745	exact	Middleburg			Mpumalanga	https://www.gem.wiki/Komati_power_station	L100000103446	G100000105836	ZAG000066697	1	1000	1000	60	2004	2044	2084
coal	South Africa	Africa	Sub-Saharan Africa	Kriel power station	Unit 1			500	operating	1976	2026	subcritical	bituminous					Eskom Holdings SOC [100%]	Eskom Holdings SOC [100.0%]	-26.2539	29.1785	exact	Kriel		Nkangala	Mpumalanga	https://www.gem.wiki/Kriel_power_station	L100000103447	G100000105964	ZAG000066697	1	3000		48	2016	2056	2096
coal	South Africa	Africa	Sub-Saharan Africa	Kriel power station	Unit 2			500	operating	1976	2027	subcritical	bituminous					Eskom Holdings SOC [100%]	Eskom Holdings SOC [100.0%]	-26.2539	29.1785	exact	Kriel		Nkangala	Mpumalanga	https://www.gem.wiki/Kriel_power_station	L100000103447	G100000105965	ZAG000066697	1	3000		48	2016	2056	2096
coal	South Africa	Africa	Sub-Saharan Africa	Kriel power station	Unit 3			500	operating	1977	2028	subcritical	bituminous					Eskom Holdings SOC [100%]	Eskom Holdings SOC [100.0%]	-26.2539	29.1785	exact	Kriel		Nkangala	Mpumalanga	https://www.gem.wiki/Kriel_power_station	L100000103447	G100000105966	ZAG000066697	1	3000		47	2017	2057	2097
coal	South Africa	Africa	Sub-Saharan Africa	Kriel power station	Unit 4			500	operating	1978	2029	subcritical	bituminous					Eskom Holdings SOC [100%]	Eskom Holdings SOC [100.0%]	-26.2539	29.1785	exact	Kriel		Nkangala	Mpumalanga	https://www.gem.wiki/Kriel_power_station	L100000103447	G100000105967	ZAG000066697	1	3000		46	2018	2058	2098
coal	South Africa	Africa	Sub-Saharan Africa	Kriel power station	Unit 5			500	operating	1979	2029	subcritical	bituminous					Eskom Holdings SOC [100%]	Eskom Holdings SOC [100.0%]	-26.2539	29.1785	exact	Kriel		Nkangala	Mpumalanga	https://www.gem.wiki/Kriel_power_station	L100000103447	G100000105968	ZAG000066697	1	3000		45	2019	2059	2099
coal	South Africa	Africa	Sub-Saharan Africa	Kriel power station	Unit 6			500	operating	1979	2030	subcritical	bituminous					Eskom Holdings SOC [100%]	Eskom Holdings SOC [100.0%]	-26.2539	29.1785	exact	Kriel		Nkangala	Mpumalanga	https://www.gem.wiki/Kriel_power_station	L100000103447	G100000105969	ZAG000066697	1	3000	3000	45	2019	2059	2099
coal	South Africa	Africa	Sub-Saharan Africa	Kusile power station	Unit 1			800	operating	2018	2069	supercritical	bituminous					Eskom Holdings SOC [100%]	Eskom Holdings SOC [100.0%]	-25.9201	28.9249	exact	Witbank			Mpumalanga	https://www.gem.wiki/Kusile_power_station	L100000103448	G100000106039	ZAG000066697	1	4800		6	2058	2098	2138
coal	South Africa	Africa	Sub-Saharan Africa	Kusile power station	Unit 2			800	operating	2020	2070	supercritical	bituminous					Eskom Holdings SOC [100%]	Eskom Holdings SOC [100.0%]	-25.9201	28.9249	exact	Witbank			Mpumalanga	https://www.gem.wiki/Kusile_power_station	L100000103448	G100000106040	ZAG000066697	1	4800		4	2060	2100	2140
coal	South Africa	Africa	Sub-Saharan Africa	Kusile power station	Unit 3			800	operating	2021	2071	supercritical	bituminous					Eskom Holdings SOC [100%]	Eskom Holdings SOC [100.0%]	-25.9201	28.9249	exact	Witbank			Mpumalanga	https://www.gem.wiki/Kusile_power_station	L100000103448	G100000106041	ZAG000066697	1	4800		3	2061	2101	2141
coal	South Africa	Africa	Sub-Saharan Africa	Kusile power station	Unit 4			800	operating	2022		supercritical	bituminous					Eskom Holdings SOC [100%]	Eskom Holdings SOC [100.0%]	-25.9201	28.9249	exact	Witbank			Mpumalanga	https://www.gem.wiki/Kusile_power_station	L100000103448	G100000106042	ZAG000066697	1	4800		2	2062	2102	2142
coal	South Africa	Africa	Sub-Saharan Africa	Kusile power station	Unit 5			800	construction	2024		supercritical	bituminous					Eskom Holdings SOC [100%]	Eskom Holdings SOC [100.0%]	-25.9201	28.9249	exact	Witbank			Mpumalanga	https://www.gem.wiki/Kusile_power_station	L100000103448	G100000106043	ZAG000066697	1	4800		0	2064	2104	2144
coal	South Africa	Africa	Sub-Saharan Africa	Kusile power station	Unit 6			800	construction	2025		supercritical	bituminous					Eskom Holdings SOC [100%]	Eskom Holdings SOC [100.0%]	-25.9201	28.9249	exact	Witbank			Mpumalanga	https://www.gem.wiki/Kusile_power_station	L100000103448	G100000106044	ZAG000066697	1	4800	4800	-1	2065	2105	2145
coal	South Africa	Africa	Sub-Saharan Africa	Lethabo power station	Unit 1			618	operating	1985	2035	subcritical	bituminous					Eskom Holdings SOC [100%]	Eskom Holdings SOC [100.0%]	-26.742	27.9769	exact	Viljoensdrif		Fezile Dabi	Free State	https://www.gem.wiki/Lethabo_power_station	L100000103423	G100000106240	ZAG000066697	1	3708		39	2025	2065	2105
coal	South Africa	Africa	Sub-Saharan Africa	Lethabo power station	Unit 2			618	operating	1986	2036	subcritical	bituminous					Eskom Holdings SOC [100%]	Eskom Holdings SOC [100.0%]	-26.742	27.9769	exact	Viljoensdrif		Fezile Dabi	Free State	https://www.gem.wiki/Lethabo_power_station	L100000103423	G100000106241	ZAG000066697	1	3708		38	2026	2066	2106
coal	South Africa	Africa	Sub-Saharan Africa	Lethabo power station	Unit 3			618	operating	1987	2037	subcritical	bituminous					Eskom Holdings SOC [100%]	Eskom Holdings SOC [100.0%]	-26.742	27.9769	exact	Viljoensdrif		Fezile Dabi	Free State	https://www.gem.wiki/Lethabo_power_station	L100000103423	G100000106242	ZAG000066697	1	3708		37	2027	2067	2107
coal	South Africa	Africa	Sub-Saharan Africa	Lethabo power station	Unit 4			618	operating	1987	2037	subcritical	bituminous					Eskom Holdings SOC [100%]	Eskom Holdings SOC [100.0%]	-26.742	27.9769	exact	Viljoensdrif		Fezile Dabi	Free State	https://www.gem.wiki/Lethabo_power_station	L100000103423	G100000106243	ZAG000066697	1	3708		37	2027	2067	2107
coal	South Africa	Africa	Sub-Saharan Africa	Lethabo power station	Unit 5			618	operating	1989	2039	subcritical	bituminous					Eskom Holdings SOC [100%]	Eskom Holdings SOC [100.0%]	-26.742	27.9769	exact	Viljoensdrif		Fezile Dabi	Free State	https://www.gem.wiki/Lethabo_power_station	L100000103423	G100000106244	ZAG000066697	1	3708		35	2029	2069	2109
coal	South Africa	Africa	Sub-Saharan Africa	Lethabo power station	Unit 6			618	operating	1990	2040	subcritical	bituminous					Eskom Holdings SOC [100%]	Eskom Holdings SOC [100.0%]	-26.742	27.9769	exact	Viljoensdrif		Fezile Dabi	Free State	https://www.gem.wiki/Lethabo_power_station	L100000103423	G100000106245	ZAG000066697	1	3708	3708	34	2030	2070	2110
coal	South Africa	Africa	Sub-Saharan Africa	Majuba power station	Unit 1			665	operating	1996	2046	subcritical	bituminous					Eskom Holdings SOC [100%]	Eskom Holdings SOC [100.0%]	-27.1006	29.771	exact	Amersfoort		Gert Sibande	Mpumalanga	https://www.gem.wiki/Majuba_power_station	L100000103449	G100000106600	ZAG000066697	1	4143		28	2036	2076	2116
coal	South Africa	Africa	Sub-Saharan Africa	Majuba power station	Unit 2			665	operating	1997	2047	subcritical	bituminous					Eskom Holdings SOC [100%]	Eskom Holdings SOC [100.0%]	-27.1006	29.771	exact	Amersfoort		Gert Sibande	Mpumalanga	https://www.gem.wiki/Majuba_power_station	L100000103449	G100000106601	ZAG000066697	1	4143		27	2037	2077	2117
coal	South Africa	Africa	Sub-Saharan Africa	Majuba power station	Unit 3			665	operating	1998	2048	subcritical	bituminous					Eskom Holdings SOC [100%]	Eskom Holdings SOC [100.0%]	-27.1006	29.771	exact	Amersfoort		Gert Sibande	Mpumalanga	https://www.gem.wiki/Majuba_power_station	L100000103449	G100000106602	ZAG000066697	1	4143		26	2038	2078	2118
coal	South Africa	Africa	Sub-Saharan Africa	Majuba power station	Unit 4			716	operating	1999	2049	subcritical	bituminous					Eskom Holdings SOC [100%]	Eskom Holdings SOC [100.0%]	-27.1006	29.771	exact	Amersfoort		Gert Sibande	Mpumalanga	https://www.gem.wiki/Majuba_power_station	L100000103449	G100000106603	ZAG000066697	1	4143		25	2039	2079	2119
coal	South Africa	Africa	Sub-Saharan Africa	Majuba power station	Unit 5			716	operating	2000	2050	subcritical	bituminous					Eskom Holdings SOC [100%]	Eskom Holdings SOC [100.0%]	-27.1006	29.771	exact	Amersfoort		Gert Sibande	Mpumalanga	https://www.gem.wiki/Majuba_power_station	L100000103449	G100000106604	ZAG000066697	1	4143		24	2040	2080	2120
coal	South Africa	Africa	Sub-Saharan Africa	Majuba power station	Unit 6			716	operating	2001	2051	subcritical	bituminous					Eskom Holdings SOC [100%]	Eskom Holdings SOC [100.0%]	-27.1006	29.771	exact	Amersfoort		Gert Sibande	Mpumalanga	https://www.gem.wiki/Majuba_power_station	L100000103449	G100000106605	ZAG000066697	1	4143	4143	23	2041	2081	2121
coal	South Africa	Africa	Sub-Saharan Africa	Matimba power station	Unit 1			665	operating	1987	2037	subcritical	bituminous					Eskom Holdings SOC [100%]	Eskom Holdings SOC [100.0%]	-23.6688	27.6108	exact	Lephalale		Waterberg	Limpopo	https://www.gem.wiki/Matimba_power_station	L100000103431	G100000106720	ZAG000066697	1	3990		37	2027	2067	2107
coal	South Africa	Africa	Sub-Saharan Africa	Matimba power station	Unit 2			665	operating	1987	2037	subcritical	bituminous					Eskom Holdings SOC [100%]	Eskom Holdings SOC [100.0%]	-23.6688	27.6108	exact	Lephalale		Waterberg	Limpopo	https://www.gem.wiki/Matimba_power_station	L100000103431	G100000106721	ZAG000066697	1	3990		37	2027	2067	2107
coal	South Africa	Africa	Sub-Saharan Africa	Matimba power station	Unit 3			665	operating	1988	2038	subcritical	bituminous					Eskom Holdings SOC [100%]	Eskom Holdings SOC [100.0%]	-23.6688	27.6108	exact	Lephalale		Waterberg	Limpopo	https://www.gem.wiki/Matimba_power_station	L100000103431	G100000106722	ZAG000066697	1	3990		36	2028	2068	2108
coal	South Africa	Africa	Sub-Saharan Africa	Matimba power station	Unit 4			665	operating	1989	2039	subcritical	bituminous					Eskom Holdings SOC [100%]	Eskom Holdings SOC [100.0%]	-23.6688	27.6108	exact	Lephalale		Waterberg	Limpopo	https://www.gem.wiki/Matimba_power_station	L100000103431	G100000106723	ZAG000066697	1	3990		35	2029	2069	2109
coal	South Africa	Africa	Sub-Saharan Africa	Matimba power station	Unit 5			665	operating	1990	2040	subcritical	bituminous					Eskom Holdings SOC [100%]	Eskom Holdings SOC [100.0%]	-23.6688	27.6108	exact	Lephalale		Waterberg	Limpopo	https://www.gem.wiki/Matimba_power_station	L100000103431	G100000106724	ZAG000066697	1	3990		34	2030	2070	2110
coal	South Africa	Africa	Sub-Saharan Africa	Matimba power station	Unit 6			665	operating	1991	2041	subcritical	bituminous					Eskom Holdings SOC [100%]	Eskom Holdings SOC [100.0%]	-23.6688	27.6108	exact	Lephalale		Waterberg	Limpopo	https://www.gem.wiki/Matimba_power_station	L100000103431	G100000106725	ZAG000066697	1	3990	3990	33	2031	2071	2111
coal	South Africa	Africa	Sub-Saharan Africa	Matla power station	Unit 1			600	operating	1979	2030	subcritical	bituminous					Eskom Holdings SOC [100%]	Eskom Holdings SOC [100.0%]	-26.2813	29.1415	exact	Kriel		Nkangala	Mpumalanga	https://www.gem.wiki/Matla_power_station	L100000103450	G100000106726	ZAG000066697	1	3600		45	2019	2059	2099
coal	South Africa	Africa	Sub-Saharan Africa	Matla power station	Unit 2			600	operating	1980	2031	subcritical	bituminous					Eskom Holdings SOC [100%]	Eskom Holdings SOC [100.0%]	-26.2813	29.1415	exact	Kriel		Nkangala	Mpumalanga	https://www.gem.wiki/Matla_power_station	L100000103450	G100000106727	ZAG000066697	1	3600		44	2020	2060	2100
coal	South Africa	Africa	Sub-Saharan Africa	Matla power station	Unit 3			600	operating	1980	2031	subcritical	bituminous					Eskom Holdings SOC [100%]	Eskom Holdings SOC [100.0%]	-26.2813	29.1415	exact	Kriel		Nkangala	Mpumalanga	https://www.gem.wiki/Matla_power_station	L100000103450	G100000106728	ZAG000066697	1	3600		44	2020	2060	2100
coal	South Africa	Africa	Sub-Saharan Africa	Matla power station	Unit 4			600	operating	1981	2032	subcritical	bituminous					Eskom Holdings SOC [100%]	Eskom Holdings SOC [100.0%]	-26.2813	29.1415	exact	Kriel		Nkangala	Mpumalanga	https://www.gem.wiki/Matla_power_station	L100000103450	G100000106729	ZAG000066697	1	3600		43	2021	2061	2101
coal	South Africa	Africa	Sub-Saharan Africa	Matla power station	Unit 5			600	operating	1982	2033	subcritical	bituminous					Eskom Holdings SOC [100%]	Eskom Holdings SOC [100.0%]	-26.2813	29.1415	exact	Kriel		Nkangala	Mpumalanga	https://www.gem.wiki/Matla_power_station	L100000103450	G100000106730	ZAG000066697	1	3600		42	2022	2062	2102
coal	South Africa	Africa	Sub-Saharan Africa	Matla power station	Unit 6			600	operating	1983	2034	subcritical	bituminous					Eskom Holdings SOC [100%]	Eskom Holdings SOC [100.0%]	-26.2813	29.1415	exact	Kriel		Nkangala	Mpumalanga	https://www.gem.wiki/Matla_power_station	L100000103450	G100000106731	ZAG000066697	1	3600	3600	41	2023	2063	2103
coal	South Africa	Africa	Sub-Saharan Africa	Medupi power station	Unit 1			794.8	operating	2021	2071	supercritical	bituminous					Eskom Holdings SOC [100%]	Eskom Holdings SOC [100.0%]	-23.705	27.5638	exact	Lephalale			Limpopo	https://www.gem.wiki/Medupi_power_station	L100000103432	G100000106780	ZAG000066697	1	4768.8		3	2061	2101	2141
coal	South Africa	Africa	Sub-Saharan Africa	Medupi power station	Unit 2			794.8	operating	2019	2069	supercritical	bituminous					Eskom Holdings SOC [100%]	Eskom Holdings SOC [100.0%]	-23.705	27.5638	exact	Lephalale			Limpopo	https://www.gem.wiki/Medupi_power_station	L100000103432	G100000106781	ZAG000066697	1	4768.8		5	2059	2099	2139
coal	South Africa	Africa	Sub-Saharan Africa	Medupi power station	Unit 3			794.8	operating	2019	2068	supercritical	bituminous					Eskom Holdings SOC [100%]	Eskom Holdings SOC [100.0%]	-23.705	27.5638	exact	Lephalale			Limpopo	https://www.gem.wiki/Medupi_power_station	L100000103432	G100000106782	ZAG000066697	1	4768.8		5	2059	2099	2139
coal	South Africa	Africa	Sub-Saharan Africa	Medupi power station	Unit 4			794.8	operating	2017	2067	supercritical	bituminous					Eskom Holdings SOC [100%]	Eskom Holdings SOC [100.0%]	-23.705	27.5638	exact	Lephalale			Limpopo	https://www.gem.wiki/Medupi_power_station	L100000103432	G100000106783	ZAG000066697	1	4768.8		7	2057	2097	2137
coal	South Africa	Africa	Sub-Saharan Africa	Medupi power station	Unit 5			794.8	operating	2017	2067	supercritical	bituminous					Eskom Holdings SOC [100%]	Eskom Holdings SOC [100.0%]	-23.705	27.5638	exact	Lephalale			Limpopo	https://www.gem.wiki/Medupi_power_station	L100000103432	G100000106784	ZAG000066697	1	4768.8		7	2057	2097	2137
coal	South Africa	Africa	Sub-Saharan Africa	Medupi power station	Unit 6			794.8	operating	2015	2065	supercritical	bituminous					Eskom Holdings SOC [100%]	Eskom Holdings SOC [100.0%]	-23.705	27.5638	exact	Lephalale			Limpopo	https://www.gem.wiki/Medupi_power_station	L100000103432	G100000106785	ZAG000066697	1	4768.8	4768.8	9	2055	2095	2135
coal	South Africa	Africa	Sub-Saharan Africa	Medupi West power station	Unit 1			800	cancelled			supercritical	bituminous					Eskom Holdings SOC [100%]	Eskom Holdings SOC [100.0%]	-24	29	approximate				Limpopo	https://www.gem.wiki/Medupi_West_power_station	L100000103433	G100000106786	ZAG000066697	1	4800		-99	40	80	120
coal	South Africa	Africa	Sub-Saharan Africa	Medupi West power station	Unit 2			800	cancelled			supercritical	bituminous					Eskom Holdings SOC [100%]	Eskom Holdings SOC [100.0%]	-24	29	approximate				Limpopo	https://www.gem.wiki/Medupi_West_power_station	L100000103433	G100000106787	ZAG000066697	1	4800		-99	40	80	120
coal	South Africa	Africa	Sub-Saharan Africa	Medupi West power station	Unit 3			800	cancelled			supercritical	bituminous					Eskom Holdings SOC [100%]	Eskom Holdings SOC [100.0%]	-24	29	approximate				Limpopo	https://www.gem.wiki/Medupi_West_power_station	L100000103433	G100000106788	ZAG000066697	1	4800		-99	40	80	120
coal	South Africa	Africa	Sub-Saharan Africa	Medupi West power station	Unit 4			800	cancelled			supercritical	bituminous					Eskom Holdings SOC [100%]	Eskom Holdings SOC [100.0%]	-24	29	approximate				Limpopo	https://www.gem.wiki/Medupi_West_power_station	L100000103433	G100000106789	ZAG000066697	1	4800		-99	40	80	120
coal	South Africa	Africa	Sub-Saharan Africa	Medupi West power station	Unit 5			800	cancelled			supercritical	bituminous					Eskom Holdings SOC [100%]	Eskom Holdings SOC [100.0%]	-24	29	approximate				Limpopo	https://www.gem.wiki/Medupi_West_power_station	L100000103433	G100000106790	ZAG000066697	1	4800		-99	40	80	120
coal	South Africa	Africa	Sub-Saharan Africa	Medupi West power station	Unit 6			800	cancelled			supercritical	bituminous					Eskom Holdings SOC [100%]	Eskom Holdings SOC [100.0%]	-24	29	approximate				Limpopo	https://www.gem.wiki/Medupi_West_power_station	L100000103433	G100000106791	ZAG000066697	1	4800	4800	-99	40	80	120
coal	South Africa	Africa	Sub-Saharan Africa	Tutuka power station	Unit 1			609	operating	1985	2035	subcritical	bituminous					Eskom Holdings SOC [100%]	Eskom Holdings SOC [100.0%]	-26.7772	29.3524	exact	Standerton		Gert Sibande	Mpumalanga	https://www.gem.wiki/Tutuka_power_station	L100000103452	G100000110396	ZAG000066697	1	3654		39	2025	2065	2105
coal	South Africa	Africa	Sub-Saharan Africa	Tutuka power station	Unit 2			609	operating	1985	2035	subcritical	bituminous					Eskom Holdings SOC [100%]	Eskom Holdings SOC [100.0%]	-26.7772	29.3524	exact	Standerton		Gert Sibande	Mpumalanga	https://www.gem.wiki/Tutuka_power_station	L100000103452	G100000110397	ZAG000066697	1	3654		39	2025	2065	2105
coal	South Africa	Africa	Sub-Saharan Africa	Tutuka power station	Unit 3			609	operating	1986	2036	subcritical	bituminous					Eskom Holdings SOC [100%]	Eskom Holdings SOC [100.0%]	-26.7772	29.3524	exact	Standerton		Gert Sibande	Mpumalanga	https://www.gem.wiki/Tutuka_power_station	L100000103452	G100000110398	ZAG000066697	1	3654		38	2026	2066	2106
coal	South Africa	Africa	Sub-Saharan Africa	Tutuka power station	Unit 4			609	operating	1987	2037	subcritical	bituminous					Eskom Holdings SOC [100%]	Eskom Holdings SOC [100.0%]	-26.7772	29.3524	exact	Standerton		Gert Sibande	Mpumalanga	https://www.gem.wiki/Tutuka_power_station	L100000103452	G100000110399	ZAG000066697	1	3654		37	2027	2067	2107
coal	South Africa	Africa	Sub-Saharan Africa	Tutuka power station	Unit 5			609	operating	1988	2038	subcritical	bituminous					Eskom Holdings SOC [100%]	Eskom Holdings SOC [100.0%]	-26.7772	29.3524	exact	Standerton		Gert Sibande	Mpumalanga	https://www.gem.wiki/Tutuka_power_station	L100000103452	G100000110400	ZAG000066697	1	3654		36	2028	2068	2108
coal	South Africa	Africa	Sub-Saharan Africa	Tutuka power station	Unit 6			609	operating	1990	2040	subcritical	bituminous					Eskom Holdings SOC [100%]	Eskom Holdings SOC [100.0%]	-26.7772	29.3524	exact	Standerton		Gert Sibande	Mpumalanga	https://www.gem.wiki/Tutuka_power_station	L100000103452	G100000110401	ZAG000066697	1	3654	3654	34	2030	2070	2110
oil/gas	South Africa	Africa	Sub-Saharan Africa	Acacia power station	1			57	operating	1976		GT	KER					Eskom Holdings SOC Ltd [100.0%]	Eskom Holdings SOC Ltd [100.0%]	-33.8831	18.5358	exact	Cape Town			Western Cape	https://www.gem.wiki/Acacia_power_station	L100000408170	G100000411354	ZAG000066697	1	171		48	2016	2056	2096
oil/gas	South Africa	Africa	Sub-Saharan Africa	Acacia power station	2			57	operating	1976		GT	KER					Eskom Holdings SOC Ltd [100.0%]	Eskom Holdings SOC Ltd [100.0%]	-33.8831	18.5358	exact	Cape Town			Western Cape	https://www.gem.wiki/Acacia_power_station	L100000408170	G100000411353	ZAG000066697	1	171		48	2016	2056	2096
oil/gas	South Africa	Africa	Sub-Saharan Africa	Acacia power station	3			57	operating	1976		GT	KER					Eskom Holdings SOC Ltd [100.0%]	Eskom Holdings SOC Ltd [100.0%]	-33.8831	18.5358	exact	Cape Town			Western Cape	https://www.gem.wiki/Acacia_power_station	L100000408170	G100000411352	ZAG000066697	1	171	171	48	2016	2056	2096
oil/gas	South Africa	Africa	Sub-Saharan Africa	Ankerlig power station	1-1			149.2	operating	2007		GT	D					Eskom Holdings SOC Ltd [100.0%]	Eskom Holdings SOC Ltd [100.0%]	-33.5895	18.4615	exact	Atlantis			Western Cape	https://www.gem.wiki/Ankerlig_power_station	L100000407107	G100000408556	ZAG000066697	1	1338.3		17	2047	2087	2127
oil/gas	South Africa	Africa	Sub-Saharan Africa	Ankerlig power station	1-2			149.2	operating	2007		GT	D					Eskom Holdings SOC Ltd [100.0%]	Eskom Holdings SOC Ltd [100.0%]	-33.5895	18.4615	exact	Atlantis			Western Cape	https://www.gem.wiki/Ankerlig_power_station	L100000407107	G100000414357	ZAG000066697	1	1338.3		17	2047	2087	2127
oil/gas	South Africa	Africa	Sub-Saharan Africa	Ankerlig power station	1-3			149.2	operating	2007		GT	D					Eskom Holdings SOC Ltd [100.0%]	Eskom Holdings SOC Ltd [100.0%]	-33.5895	18.4615	exact	Atlantis			Western Cape	https://www.gem.wiki/Ankerlig_power_station	L100000407107	G100000414356	ZAG000066697	1	1338.3		17	2047	2087	2127
oil/gas	South Africa	Africa	Sub-Saharan Africa	Ankerlig power station	1-4			149.2	operating	2007		GT	D					Eskom Holdings SOC Ltd [100.0%]	Eskom Holdings SOC Ltd [100.0%]	-33.5895	18.4615	exact	Atlantis			Western Cape	https://www.gem.wiki/Ankerlig_power_station	L100000407107	G100000414355	ZAG000066697	1	1338.3		17	2047	2087	2127
oil/gas	South Africa	Africa	Sub-Saharan Africa	Ankerlig power station	2-1			148.3	operating	2009		GT	D					Eskom Holdings SOC Ltd [100.0%]	Eskom Holdings SOC Ltd [100.0%]	-33.5895	18.4615	exact	Atlantis			Western Cape	https://www.gem.wiki/Ankerlig_power_station	L100000407107	G100000413925	ZAG000066697	1	1338.3		15	2049	2089	2129
oil/gas	South Africa	Africa	Sub-Saharan Africa	Ankerlig power station	2-2			148.3	operating	2009		GT	D					Eskom Holdings SOC Ltd [100.0%]	Eskom Holdings SOC Ltd [100.0%]	-33.5895	18.4615	exact	Atlantis			Western Cape	https://www.gem.wiki/Ankerlig_power_station	L100000407107	G100000414354	ZAG000066697	1	1338.3		15	2049	2089	2129
oil/gas	South Africa	Africa	Sub-Saharan Africa	Ankerlig power station	2-3			148.3	operating	2009		GT	D					Eskom Holdings SOC Ltd [100.0%]	Eskom Holdings SOC Ltd [100.0%]	-33.5895	18.4615	exact	Atlantis			Western Cape	https://www.gem.wiki/Ankerlig_power_station	L100000407107	G100000414353	ZAG000066697	1	1338.3		15	2049	2089	2129
oil/gas	South Africa	Africa	Sub-Saharan Africa	Ankerlig power station	2-4			148.3	operating	2009		GT	D					Eskom Holdings SOC Ltd [100.0%]	Eskom Holdings SOC Ltd [100.0%]	-33.5895	18.4615	exact	Atlantis			Western Cape	https://www.gem.wiki/Ankerlig_power_station	L100000407107	G100000414352	ZAG000066697	1	1338.3		15	2049	2089	2129
oil/gas	South Africa	Africa	Sub-Saharan Africa	Ankerlig power station	2-5			148.3	operating	2009		GT	D					Eskom Holdings SOC Ltd [100.0%]	Eskom Holdings SOC Ltd [100.0%]	-33.5895	18.4615	exact	Atlantis			Western Cape	https://www.gem.wiki/Ankerlig_power_station	L100000407107	G100000414351	ZAG000066697	1	1338.3	1338.3	15	2049	2089	2129
oil/gas	South Africa	Africa	Sub-Saharan Africa	Gourikwa power station	1			148	operating	2007		GT	D					Eskom Holdings SOC Ltd [100.0%]	Eskom Holdings SOC Ltd [100.0%]	-34.1668	21.9607	exact	Mossel Bay			Western Cape	https://www.gem.wiki/Gourikwa_power_station	L100000407108	G100000408557	ZAG000066697	1	740		17	2047	2087	2127
oil/gas	South Africa	Africa	Sub-Saharan Africa	Gourikwa power station	2			148	operating	2007		GT	D					Eskom Holdings SOC Ltd [100.0%]	Eskom Holdings SOC Ltd [100.0%]	-34.1668	21.9607	exact	Mossel Bay			Western Cape	https://www.gem.wiki/Gourikwa_power_station	L100000407108	G100000410887	ZAG000066697	1	740		17	2047	2087	2127
oil/gas	South Africa	Africa	Sub-Saharan Africa	Gourikwa power station	3			148	operating	2007		GT	D					Eskom Holdings SOC Ltd [100.0%]	Eskom Holdings SOC Ltd [100.0%]	-34.1668	21.9607	exact	Mossel Bay			Western Cape	https://www.gem.wiki/Gourikwa_power_station	L100000407108	G100000410886	ZAG000066697	1	740		17	2047	2087	2127
oil/gas	South Africa	Africa	Sub-Saharan Africa	Gourikwa power station	4			148	operating	2009		GT	D					Eskom Holdings SOC Ltd [100.0%]	Eskom Holdings SOC Ltd [100.0%]	-34.1668	21.9607	exact	Mossel Bay			Western Cape	https://www.gem.wiki/Gourikwa_power_station	L100000407108	G100000410885	ZAG000066697	1	740		15	2049	2089	2129
oil/gas	South Africa	Africa	Sub-Saharan Africa	Gourikwa power station	5			148	operating	2009		GT	D					Eskom Holdings SOC Ltd [100.0%]	Eskom Holdings SOC Ltd [100.0%]	-34.1668	21.9607	exact	Mossel Bay			Western Cape	https://www.gem.wiki/Gourikwa_power_station	L100000407108	G100000410884	ZAG000066697	1	740	740	15	2049	2089	2129
oil/gas	South Africa	Africa	Sub-Saharan Africa	Port Rex power station	4			57	operating	1976		GT	KER					Eskom Holdings SOC Ltd [100.0%]	Eskom Holdings SOC Ltd [100.0%]	-33.028	27.8818	exact	East London				https://www.gem.wiki/Port_Rex_power_station	L100000408172	G100000411351	ZAG000066697	1	171		48	2016	2056	2096
oil/gas	South Africa	Africa	Sub-Saharan Africa	Port Rex power station	5			57	operating	1976		GT	KER					Eskom Holdings SOC Ltd [100.0%]	Eskom Holdings SOC Ltd [100.0%]	-33.028	27.8818	exact	East London				https://www.gem.wiki/Port_Rex_power_station	L100000408172	G100000411350	ZAG000066697	1	171		48	2016	2056	2096
oil/gas	South Africa	Africa	Sub-Saharan Africa	Port Rex power station	6			57	operating	1976		GT	KER					Eskom Holdings SOC Ltd [100.0%]	Eskom Holdings SOC Ltd [100.0%]	-33.028	27.8818	exact	East London				https://www.gem.wiki/Port_Rex_power_station	L100000408172	G100000411349	ZAG000066697	1	171	171	48	2016	2056	2096
oil/gas	South Africa	Africa	Sub-Saharan Africa	Richards Bay (Eskom) power station	1			3000	pre-construction			CC	LNG					Eskom Holdings SOC Ltd [100.0%]	Eskom Holdings SOC Ltd [100.0%]	-28.771	31.9765	exact	Richards Bay			KwaZulu-Natal	https://www.gem.wiki/Richards_Bay_(Eskom)_power_station	L100000407360	G100000409408	ZAG000066697	1	3000	3000	-99	40	80	120
wind	South Africa	Africa	Sub-Saharan Africa	Komati wind farm			Komati Just Energy Transition Project	70	pre-construction			onshore						Eskom		-26.0905	29.4718	approximate					https://gem.wiki/Komati_wind_farm	L922011	G927425	ZAG000066697	1	70	70	-99	40	80	120
wind	South Africa	Africa	Sub-Saharan Africa	Sere wind farm	1			100	operating	2015		onshore						Eskom		-31.5296	18.0943	exact	Matzikama Local Municipality	West Coast District Municipality		Western Cape	https://gem.wiki/Sere_wind_farm	L900027	G900029	ZAG000066697	1	100	100	9	2055	2095	2135
nuclear	South Africa	Africa	Sub-Saharan Africa	Duynefontein nuclear power plant	1			1650	cancelled			unknown						Eskom		-33.6866	18.4402	exact		City of Cape Town		Western Cape	https://gem.wiki/Duynefontein_nuclear_power_plant	L500439	G501272	ZAG000066697	1	3300		-99	40	80	120
nuclear	South Africa	Africa	Sub-Saharan Africa	Duynefontein nuclear power plant	2			1650	cancelled			unknown						Eskom		-33.6866	18.4402	exact		City of Cape Town		Western Cape	https://gem.wiki/Duynefontein_nuclear_power_plant	L500439	G501273	ZAG000066697	1	3300	3300	-99	40	80	120
nuclear	South Africa	Africa	Sub-Saharan Africa	Koeberg nuclear power plant	1			970	operating	1984		pressurized water reactor						Eskom		-33.6746	18.4321	exact		City of Cape Town		Western Cape	https://gem.wiki/Koeberg_nuclear_power_plant	L500139	G500317	ZAG000066697	1	1940		40	2024	2064	2104
nuclear	South Africa	Africa	Sub-Saharan Africa	Koeberg nuclear power plant	2			970	operating	1985		pressurized water reactor						Eskom		-33.6746	18.4321	exact		City of Cape Town		Western Cape	https://gem.wiki/Koeberg_nuclear_power_plant	L500139	G500318	ZAG000066697	1	1940	1940	39	2025	2065	2105
hydropower	South Africa	Africa	Sub-Saharan Africa	Drakensberg hydroelectric plant				1000	operating	1982		pumped storage				TRUE	FALSE	Eskom		-28.566	29.0834	exact	Okhahlamba Local Municipality	Uthukela District Municipality		KwaZulu-Natal	https://gem.wiki/Drakensberg_hydroelectric_plant	L603315	G603350	ZAG000066697	1	1000	1000	42	2022	2062	2102
hydropower	South Africa	Africa	Sub-Saharan Africa	Ingula hydroelectric plant				1332	operating	2016		pumped storage				TRUE	FALSE	Eskom		-28.2809	29.588	exact	Emnambithi/Ladysmith Local Municipality	Uthukela District Municipality		KwaZulu-Natal	https://gem.wiki/Ingula_hydroelectric_plant	L603317	G603352	ZAG000066697	1	1332	1332	8	2056	2096	2136
hydropower	South Africa	Africa	Sub-Saharan Africa	Palmiet hydroelectric plant				400	operating	1988		pumped storage				TRUE	FALSE	Eskom		-34.1985	18.9746	exact	Theewaterskloof Local Municipality	Overberg District Municipality		Western Cape	https://gem.wiki/Palmiet_hydroelectric_plant	L603318	G603353	ZAG000066697	1	400	400	36	2028	2068	2108
hydropower	South Africa	Africa	Sub-Saharan Africa	Tubatse hydroelectric plant				1500	announced			pumped storage				TRUE	FALSE	Eskom		-24.8058	30.1118	exact	Greater Tubatse Local Municipality	Sekhukhune District Municipality		Limpopo	https://gem.wiki/Tubatse_hydroelectric_plant	L603320	G604895	ZAG000066697	1	1500	1500	-99	40	80	120

## Sheet: Factors
Fuel Type	Capacity factor 2021	Capacity factor 2022	CF2020	CF2021	CF2022	CF2023		Eskom Holdings SOC Ltd.. - annual report 2021	https://www.eskom.co.za/wp-content/uploads/2021/08/2021IntegratedReport.pdf
Coal-hard	0.566634	0.51682	0.592851	0.540416	0.533998	0.499642		Eskom Holdings SOC Ltd. - annual report 2022	https://www.eskom.co.za/wp-content/uploads/2022/12/2022_integrated_report.pdf
Lignite	0	0	0	0	0	0
Oil	0.191	0.191	0.191	0.191	0.191	0.191
Gas	0.0659864	0.114771	0.0629299	0.0690428	0.0865286	0.143014
Fuel Type	Heat rate (Btu per kWh) 2022
Coal	10689							CDP C-EU8.2d 2021
Petroleum	11166							Energy Source Type	Nameplate capacity (MW)	Gross electricity generation (GWh)	Net electricity generation (GWh)	Absolute scope 1 emissions (metric tons CO2e)	Scope 1 emissions intensity (metric tons CO2e per GWh)		Capacity factor
Natural Gas	7740							Coal – hard	44013	184569					0.478711
Nuclear	10448							Lignite
								Oil
Fuel Type	Emission factors (kg of CO2 per TJ) US		Fuel Type	Emission factors (kg of CO2 per TJ) IPCC2006				Gas	2426	1826					0.0859223
Bituminous Coal	88374.7		Crude Oil	73300				Sustainable biomass
Distillate Oil	70271.4		Natural Gas Liquids	64200				Other biomass
Jet Fuel	68461		Coking Coal	94600				Waste (non-biomass)
Kerosene	69370.9		Other Bituminous Coal	94600				Nuclear	1934	12355
Lignite Coal	93142.3		Sub-Bituminous Coal	96100				Fossil-fuel plants fitted with CCS
Municipal Solid Waste	47286.7		Lignite	101000				Geothermal
Natural Gas	50149.2		Coke	107000				Hydropower	600	1943					0.369673
Petroleum Coke	96791.4		Gas/Diesel Oil	74100				Wind	100	253					0.288813
Propane Gas	59598.9		Residual Fuel Oil	77400				Solar
Refined Coal	88374.7		Natural Gas	56100				Marine
Residual Fuel Oil	71171.8		Natural Gas Liquids	64200				Other renewable
Subbituminous Coal	92061.8		Wood / Wood Waste	112000				Other non-renewable	2732	4743					0.198184
Tire-Derived Fuel	81484.1		Charcoal	112000				Total	51805	205689	199255	207.3	1.04		0.453247
Waste Coal	88374.7		Industrial Wastes	143000
Waste Oil	70138.7		Waste Oils	73300				CDP C-EU8.2d 2022
Fuel Type	Emission factors (kg of CO2 per MMBTU) US		Fuel Type	Emission factors (kg of CO2 per MMBTU) IPCC2006				Energy Source Type	Nameplate capacity (MW)	Gross electricity generation (GWh)	Net electricity generation (GWh)	Absolute scope 1 emissions (metric tons CO2e)	Scope 1 emissions intensity (metric tons CO2e per GWh)		Capacity factor
Bituminous Coal	93.24		Crude Oil	77.3354				Coal – hard	44598		171131				0.438035
Distillate Oil	74.14		Natural Gas Liquids	67.7344				Lignite
Jet Fuel	72.23		Coking Coal	99.808				Oil
Kerosene	73.19		Other Bituminous Coal	99.808				Gas	2426		3018				0.142012
Lignite Coal	98.27		Sub-Bituminous Coal	101.391				Sustainable biomass
Municipal Solid Waste	49.89		Lignite	106.56				Other biomass
Natural Gas	52.91		Coke	112.891				Waste (non-biomass)
Petroleum Coke	102.12		Gas/Diesel Oil	78.1794				Nuclear	1934		9803
Propane Gas	62.88		Residual Fuel Oil	81.6611				Fossil-fuel plants fitted with CCS
Refined Coal	93.24		Natural Gas	59.1885				Geothermal
Residual Fuel Oil	75.09		Natural Gas Liquids	67.7344				Hydropower	661		3060				0.528465
Subbituminous Coal	97.13		Wood / Wood Waste	118.166				Wind	100		214				0.244292
Tire-Derived Fuel	85.97		Charcoal	118.166				Solar
Waste Coal	93.24		Industrial Wastes	150.873				Marine
Waste Oil	74		Waste Oils	77.3354				Other renewable
								Other non-renewable	2732		4081				0.170523
								Total	52451		191307	197594619			0.416364
								2021	2022
							5206	6831	6831	MW	IPP capacity
							45117	46466	47145	MW	Nominal power station capacity
									198281	GWh	Electricity sales to distributors and industrial, commercial, international, residential and other customers
										0.480111
									205688	GWh	Generated by Eskom power stations
									226226	GWh	Energy available for distribution
														Capacity (MW)
								Source, GWh	2023	2022	2021	2020		2023	2022	2021	2020
								Coal-fired stations	171131	184568	183553	194357		39099	39456	38773	37424
								Nuclear power	9803	12355	9903	13252		1854	1854	1860	1860
								Pumped storage stations	4081	4743	4795	5060		2724	2724	2724	2724
								Hydro stations	3060	1943	1387	688		602	603	600	600
								Open-cycle gas turbines (OCGTs)	3018	1826	1457	1328		2409	2409	2409	2409
								Wind	214	253	305	283		100	100	100	100
								Eskom generation	191307	205688	201400	214968		53619	53976	53297	51948
								Pumping by pumped storage stations	-5504	-6434	-6625	-6629		CF
								Net sent out by Eskom	185803	199254	194775	208339	coal	0.499642	0.533998	0.540416	0.592851
								Independent power producers	17957	15973	13526	11958	gas	0.143014	0.0865286	0.0690428	0.0629299
								Imports	8654	8500	8812	8568
								Wheeling	2904	2499	2310	2491
								Energy available for distribution	215318	226226	219423	231356
								https://www.eskom.co.za/wp-content/uploads/2022/12/2022_integrated_report.pdf
								https://www.eskom.co.za/wp-content/uploads/2023/10/Eskom_integrated_report_2023.pdf
									2023	2022	2021	2020	CF23_22	CF21_20
								Energy utilisation factor	0.763	0.7978	0.7634	0.7978	0.7804	0.7806
								Energy availability factor		0.6419	0.6664
								https://www.eskom.co.za/wp-content/uploads/2021/08/AFS2021.pdf
								https://www.eskom.co.za/wp-content/uploads/2023/10/Eskom_sustainability_report_2023.pdf
								Scope 1 Stationary Combustion Generation 2022 Emissions (tCO2 e)	193157057
								The energy utilisation factor (EUF) for the entire generation fleet has increased to 79.78% (2021: 76.34%). Persistent high EUF levels continue to place stress on units, thereby affecting reliability and leading to elevated levels of unplanned capability loss factor (UCLF).
								The high average fleet EUF was largely due to coal-fired stations running at an average EUF of 93.98% (2021: 90.42%), with 14 of 15 coal-fired stations recording EUF above 90%.
								The energy utilisation factor (EUF) for the entire generation fleet has increased to 81.48% (2022: 79.78%).
								The high average fleet EUF was largely due to coal-fired stations running at an average EUF of 95.59% (2022: 93.98%), with all 15 coal-fired stations recording EUF above 90%.
								The energy utilisation factor (EUF) improved to 76.3% (2020: 79.0%) in the current year. Persistent high EUF levels continue to place stress on units, ultimately affecting their reliability and leading to high levels of unplanned capability loss factor.
								The high EUF was largely due to coal-fired stations running at an average EUF of 90.4% (2020: 93.3%) for the year, which is well above the international norm of approximately 75% over the long term.

## Sheet: Eskom_BAU
Type	Country/area	Region	Subregion	Plant / Project name	Unit / Phase name	Plant / Project name (local)	Plant / Project name (other)	Capacity (MW)	Status	Start year	Retired year	Technology	Fuel	Country/area 1 (hydropower only)	Country/area 2 (hydropower only)	Country/area 1 Capacity (MW) (hydropower only)	Country/area 2 Capacity (MW) (hydropower only)	Owner	Parent	Latitude	Longitude	Location accuracy	City	Local area (taluk, county)	Major area (prefecture, district)	Subnational unit (state, province)	GEM.Wiki URL	GEM location ID	GEM unit/phase ID	CompISIN	Ownership	Plant capacity	Plant capacity	Age	Reinvestment year	Reinvestment year	Reinvestment year	2020	2021	2022	2023	2024	2025	2026	2027	2028	2029	2030	2031
coal	South Africa	Africa	Sub-Saharan Africa	Arnot power station	Unit 1			370	operating	1972	2026	subcritical	bituminous					Eskom Holdings SOC [100%]	Eskom Holdings SOC [100.0%]	-25.9438	29.792	exact	Rietkuil		Nkangala	Mpumalanga	https://www.gem.wiki/Arnot_power_station	L100000103438	G100000100348	ZAG000066697	1	2352		52	2012	2052	2092	370	370	370	370	370	370	370	370	370	370	370	370
coal	South Africa	Africa	Sub-Saharan Africa	Arnot power station	Unit 2			390	operating	1971	2026	subcritical	bituminous					Eskom Holdings SOC [100%]	Eskom Holdings SOC [100.0%]	-25.9438	29.792	exact	Rietkuil		Nkangala	Mpumalanga	https://www.gem.wiki/Arnot_power_station	L100000103438	G100000100349	ZAG000066697	1	2352		53	2011	2051	2091	390	390	390	390	390	390	390	390	390	390	390	390
coal	South Africa	Africa	Sub-Saharan Africa	Arnot power station	Unit 3			396	operating	1971	2026	subcritical	bituminous					Eskom Holdings SOC [100%]	Eskom Holdings SOC [100.0%]	-25.9438	29.792	exact	Rietkuil		Nkangala	Mpumalanga	https://www.gem.wiki/Arnot_power_station	L100000103438	G100000100350	ZAG000066697	1	2352		53	2011	2051	2091	396	396	396	396	396	396	396	396	396	396	396	396
coal	South Africa	Africa	Sub-Saharan Africa	Arnot power station	Unit 4			396	operating	1973	2027	subcritical	bituminous					Eskom Holdings SOC [100%]	Eskom Holdings SOC [100.0%]	-25.9438	29.792	exact	Rietkuil		Nkangala	Mpumalanga	https://www.gem.wiki/Arnot_power_station	L100000103438	G100000100351	ZAG000066697	1	2352		51	2013	2053	2093	396	396	396	396	396	396	396	396	396	396	396	396
coal	South Africa	Africa	Sub-Saharan Africa	Arnot power station	Unit 5			400	operating	1974	2029	subcritical	bituminous					Eskom Holdings SOC [100%]	Eskom Holdings SOC [100.0%]	-25.9438	29.792	exact	Rietkuil		Nkangala	Mpumalanga	https://www.gem.wiki/Arnot_power_station	L100000103438	G100000100352	ZAG000066697	1	2352		50	2014	2054	2094	400	400	400	400	400	400	400	400	400	400	400	400
coal	South Africa	Africa	Sub-Saharan Africa	Arnot power station	Unit 6			400	operating	1975	2029	subcritical	bituminous					Eskom Holdings SOC [100%]	Eskom Holdings SOC [100.0%]	-25.9438	29.792	exact	Rietkuil		Nkangala	Mpumalanga	https://www.gem.wiki/Arnot_power_station	L100000103438	G100000100353	ZAG000066697	1	2352	2352	49	2015	2055	2095	400	400	400	400	400	400	400	400	400	400	400	400
coal	South Africa	Africa	Sub-Saharan Africa	Camden power station	Unit 1			200	operating	1968	2025	subcritical	bituminous					Eskom Holdings SOC [100%]	Eskom Holdings SOC [100.0%]	-26.6215	30.0901	exact	Camden		Gert Sibande	Mpumalanga	https://www.gem.wiki/Camden_power_station	L100000103439	G100000101168	ZAG000066697	1	1600		56	2008	2048	2088	200	200	200	200	200	200	200	200	200	200	200	200
coal	South Africa	Africa	Sub-Saharan Africa	Camden power station	Unit 2			200	operating	1967	2025	subcritical	bituminous					Eskom Holdings SOC [100%]	Eskom Holdings SOC [100.0%]	-26.6215	30.0901	exact	Camden		Gert Sibande	Mpumalanga	https://www.gem.wiki/Camden_power_station	L100000103439	G100000101169	ZAG000066697	1	1600		57	2007	2047	2087	200	200	200	200	200	200	200	200	200	200	200	200
coal	South Africa	Africa	Sub-Saharan Africa	Camden power station	Unit 3			200	operating	1967	2025	subcritical	bituminous					Eskom Holdings SOC [100%]	Eskom Holdings SOC [100.0%]	-26.6215	30.0901	exact	Camden		Gert Sibande	Mpumalanga	https://www.gem.wiki/Camden_power_station	L100000103439	G100000101170	ZAG000066697	1	1600		57	2007	2047	2087	200	200	200	200	200	200	200	200	200	200	200	200
coal	South Africa	Africa	Sub-Saharan Africa	Camden power station	Unit 4			200	operating	1967	2025	subcritical	bituminous					Eskom Holdings SOC [100%]	Eskom Holdings SOC [100.0%]	-26.6215	30.0901	exact	Camden		Gert Sibande	Mpumalanga	https://www.gem.wiki/Camden_power_station	L100000103439	G100000101171	ZAG000066697	1	1600		57	2007	2047	2087	200	200	200	200	200	200	200	200	200	200	200	200
coal	South Africa	Africa	Sub-Saharan Africa	Camden power station	Unit 5			200	operating	1967	2025	subcritical	bituminous					Eskom Holdings SOC [100%]	Eskom Holdings SOC [100.0%]	-26.6215	30.0901	exact	Camden		Gert Sibande	Mpumalanga	https://www.gem.wiki/Camden_power_station	L100000103439	G100000101172	ZAG000066697	1	1600		57	2007	2047	2087	200	200	200	200	200	200	200	200	200	200	200	200
coal	South Africa	Africa	Sub-Saharan Africa	Camden power station	Unit 6			200	operating	1968	2025	subcritical	bituminous					Eskom Holdings SOC [100%]	Eskom Holdings SOC [100.0%]	-26.6215	30.0901	exact	Camden		Gert Sibande	Mpumalanga	https://www.gem.wiki/Camden_power_station	L100000103439	G100000101173	ZAG000066697	1	1600		56	2008	2048	2088	200	200	200	200	200	200	200	200	200	200	200	200
coal	South Africa	Africa	Sub-Saharan Africa	Camden power station	Unit 7			200	operating	1969	2025	subcritical	bituminous					Eskom Holdings SOC [100%]	Eskom Holdings SOC [100.0%]	-26.6215	30.0901	exact	Camden		Gert Sibande	Mpumalanga	https://www.gem.wiki/Camden_power_station	L100000103439	G100000101174	ZAG000066697	1	1600		55	2009	2049	2089	200	200	200	200	200	200	200	200	200	200	200	200
coal	South Africa	Africa	Sub-Saharan Africa	Camden power station	Unit 8			200	operating	1969	2025	subcritical	bituminous					Eskom Holdings SOC [100%]	Eskom Holdings SOC [100.0%]	-26.6215	30.0901	exact	Camden		Gert Sibande	Mpumalanga	https://www.gem.wiki/Camden_power_station	L100000103439	G100000101175	ZAG000066697	1	1600	1600	55	2009	2049	2089	200	200	200	200	200	200	200	200	200	200	200	200
coal	South Africa	Africa	Sub-Saharan Africa	Duvha power station	Unit 1			600	operating	1980	2031	subcritical	bituminous					Eskom Holdings SOC [100%]	Eskom Holdings SOC [100.0%]	-25.9613	29.3397	exact	Witbank		Nkangala	Mpumalanga	https://www.gem.wiki/Duvha_power_station	L100000103440	G100000102524	ZAG000066697	1	3600		44	2020	2060	2100	600	600	600	600	600	600	600	600	600	600	600	600
coal	South Africa	Africa	Sub-Saharan Africa	Duvha power station	Unit 2			600	operating	1980	2031	subcritical	bituminous					Eskom Holdings SOC [100%]	Eskom Holdings SOC [100.0%]	-25.9613	29.3397	exact	Witbank		Nkangala	Mpumalanga	https://www.gem.wiki/Duvha_power_station	L100000103440	G100000102525	ZAG000066697	1	3600		44	2020	2060	2100	600	600	600	600	600	600	600	600	600	600	600	600
coal	South Africa	Africa	Sub-Saharan Africa	Duvha power station	Unit 3			600	mothballed	1981	2032	subcritical	bituminous					Eskom Holdings SOC [100%]	Eskom Holdings SOC [100.0%]	-25.9613	29.3397	exact	Witbank		Nkangala	Mpumalanga	https://www.gem.wiki/Duvha_power_station	L100000103440	G100000102526	ZAG000066697	1	3600		43	2021	2061	2101	0	0	0	0	0	0	0	0	0	0	0	0
coal	South Africa	Africa	Sub-Saharan Africa	Duvha power station	Unit 4			600	operating	1982	2033	subcritical	bituminous					Eskom Holdings SOC [100%]	Eskom Holdings SOC [100.0%]	-25.9613	29.3397	exact	Witbank		Nkangala	Mpumalanga	https://www.gem.wiki/Duvha_power_station	L100000103440	G100000102527	ZAG000066697	1	3600		42	2022	2062	2102	600	600	600	600	600	600	600	600	600	600	600	600
coal	South Africa	Africa	Sub-Saharan Africa	Duvha power station	Unit 5			600	operating	1983	2033	subcritical	bituminous					Eskom Holdings SOC [100%]	Eskom Holdings SOC [100.0%]	-25.9613	29.3397	exact	Witbank		Nkangala	Mpumalanga	https://www.gem.wiki/Duvha_power_station	L100000103440	G100000102528	ZAG000066697	1	3600		41	2023	2063	2103	600	600	600	600	600	600	600	600	600	600	600	600
coal	South Africa	Africa	Sub-Saharan Africa	Duvha power station	Unit 6			600	operating	1984	2034	subcritical	bituminous					Eskom Holdings SOC [100%]	Eskom Holdings SOC [100.0%]	-25.9613	29.3397	exact	Witbank		Nkangala	Mpumalanga	https://www.gem.wiki/Duvha_power_station	L100000103440	G100000102529	ZAG000066697	1	3600	3600	40	2024	2064	2104	600	600	600	600	600	600	600	600	600	600	600	600
coal	South Africa	Africa	Sub-Saharan Africa	Grootvlei power station	Unit 1			200	operating	1973	2027	subcritical	bituminous					Eskom Holdings SOC [100%]	Eskom Holdings SOC [100.0%]	-26.7685	28.4978	exact	Grootvlei		Gert Sibande	Mpumalanga	https://www.gem.wiki/Grootvlei_power_station	L100000103441	G100000103136	ZAG000066697	1	1190		51	2013	2053	2093	200	200	200	200	200	200	200	200	200	200	200	200
coal	South Africa	Africa	Sub-Saharan Africa	Grootvlei power station	Unit 2			200	operating	1970	2027	subcritical	bituminous					Eskom Holdings SOC [100%]	Eskom Holdings SOC [100.0%]	-26.7685	28.4978	exact	Grootvlei		Gert Sibande	Mpumalanga	https://www.gem.wiki/Grootvlei_power_station	L100000103441	G100000103137	ZAG000066697	1	1190		54	2010	2050	2090	200	200	200	200	200	200	200	200	200	200	200	200
coal	South Africa	Africa	Sub-Saharan Africa	Grootvlei power station	Unit 3			200	operating	1969	2027	subcritical	bituminous					Eskom Holdings SOC [100%]	Eskom Holdings SOC [100.0%]	-26.7685	28.4978	exact	Grootvlei		Gert Sibande	Mpumalanga	https://www.gem.wiki/Grootvlei_power_station	L100000103441	G100000103138	ZAG000066697	1	1190		55	2009	2049	2089	200	200	200	200	200	200	200	200	200	200	200	200
coal	South Africa	Africa	Sub-Saharan Africa	Grootvlei power station	Unit 4			200	mothballed	1969	2025	subcritical	bituminous					Eskom Holdings SOC [100%]	Eskom Holdings SOC [100.0%]	-26.7685	28.4978	exact	Grootvlei		Gert Sibande	Mpumalanga	https://www.gem.wiki/Grootvlei_power_station	L100000103441	G100000103139	ZAG000066697	1	1190		55	2009	2049	2089	0	0	0	0	0	0	0	0	0	0	0	0
coal	South Africa	Africa	Sub-Saharan Africa	Grootvlei power station	Unit 5			190	mothballed	1971	2025	subcritical	bituminous					Eskom Holdings SOC [100%]	Eskom Holdings SOC [100.0%]	-26.7685	28.4978	exact	Grootvlei		Gert Sibande	Mpumalanga	https://www.gem.wiki/Grootvlei_power_station	L100000103441	G100000103140	ZAG000066697	1	1190		53	2011	2051	2091	0	0	0	0	0	0	0	0	0	0	0	0
coal	South Africa	Africa	Sub-Saharan Africa	Grootvlei power station	Unit 6			200	mothballed	1977	2025	subcritical	bituminous					Eskom Holdings SOC [100%]	Eskom Holdings SOC [100.0%]	-26.7685	28.4978	exact	Grootvlei		Gert Sibande	Mpumalanga	https://www.gem.wiki/Grootvlei_power_station	L100000103441	G100000103141	ZAG000066697	1	1190	1190	47	2017	2057	2097	0	0	0	0	0	0	0	0	0	0	0	0
coal	South Africa	Africa	Sub-Saharan Africa	Hendrina power station	Unit 1			200	mothballed	1972	2025	subcritical	bituminous					Eskom Holdings SOC [100%]	Eskom Holdings SOC [100.0%]	-26.032	29.6016	exact	Pullens Hope		Nkangala	Mpumalanga	https://www.gem.wiki/Hendrina_power_station	L100000103442	G100000103806	ZAG000066697	1	2000		52	2012	2052	2092	0	0	0	0	0	0	0	0	0	0	0	0
coal	South Africa	Africa	Sub-Saharan Africa	Hendrina power station	Unit 10			200	operating	1977	2025	subcritical	bituminous					Eskom Holdings SOC [100%]	Eskom Holdings SOC [100.0%]	-26.032	29.6016	exact	Pullens Hope		Nkangala	Mpumalanga	https://www.gem.wiki/Hendrina_power_station	L100000103442	G100000103807	ZAG000066697	1	2000		47	2017	2057	2097	200	200	200	200	200	200	200	200	200	200	200	200
coal	South Africa	Africa	Sub-Saharan Africa	Hendrina power station	Unit 2			200	operating	1971	2025	subcritical	bituminous					Eskom Holdings SOC [100%]	Eskom Holdings SOC [100.0%]	-26.032	29.6016	exact	Pullens Hope		Nkangala	Mpumalanga	https://www.gem.wiki/Hendrina_power_station	L100000103442	G100000103808	ZAG000066697	1	2000		53	2011	2051	2091	200	200	200	200	200	200	200	200	200	200	200	200
coal	South Africa	Africa	Sub-Saharan Africa	Hendrina power station	Unit 3			200	mothballed	1970	2025	subcritical	bituminous					Eskom Holdings SOC [100%]	Eskom Holdings SOC [100.0%]	-26.032	29.6016	exact	Pullens Hope		Nkangala	Mpumalanga	https://www.gem.wiki/Hendrina_power_station	L100000103442	G100000103809	ZAG000066697	1	2000		54	2010	2050	2090	0	0	0	0	0	0	0	0	0	0	0	0
coal	South Africa	Africa	Sub-Saharan Africa	Hendrina power station	Unit 4			200	operating	1970	2025	subcritical	bituminous					Eskom Holdings SOC [100%]	Eskom Holdings SOC [100.0%]	-26.032	29.6016	exact	Pullens Hope		Nkangala	Mpumalanga	https://www.gem.wiki/Hendrina_power_station	L100000103442	G100000103810	ZAG000066697	1	2000		54	2010	2050	2090	200	200	200	200	200	200	200	200	200	200	200	200
coal	South Africa	Africa	Sub-Saharan Africa	Hendrina power station	Unit 5			200	operating	1971	2025	subcritical	bituminous					Eskom Holdings SOC [100%]	Eskom Holdings SOC [100.0%]	-26.032	29.6016	exact	Pullens Hope		Nkangala	Mpumalanga	https://www.gem.wiki/Hendrina_power_station	L100000103442	G100000103811	ZAG000066697	1	2000		53	2011	2051	2091	200	200	200	200	200	200	200	200	200	200	200	200
coal	South Africa	Africa	Sub-Saharan Africa	Hendrina power station	Unit 6			200	operating	1973	2025	subcritical	bituminous					Eskom Holdings SOC [100%]	Eskom Holdings SOC [100.0%]	-26.032	29.6016	exact	Pullens Hope		Nkangala	Mpumalanga	https://www.gem.wiki/Hendrina_power_station	L100000103442	G100000103812	ZAG000066697	1	2000		51	2013	2053	2093	200	200	200	200	200	200	200	200	200	200	200	200
coal	South Africa	Africa	Sub-Saharan Africa	Hendrina power station	Unit 7			200	operating	1974	2025	subcritical	bituminous					Eskom Holdings SOC [100%]	Eskom Holdings SOC [100.0%]	-26.032	29.6016	exact	Pullens Hope		Nkangala	Mpumalanga	https://www.gem.wiki/Hendrina_power_station	L100000103442	G100000103813	ZAG000066697	1	2000		50	2014	2054	2094	200	200	200	200	200	200	200	200	200	200	200	200
coal	South Africa	Africa	Sub-Saharan Africa	Hendrina power station	Unit 8			200	operating	1975	2025	subcritical	bituminous					Eskom Holdings SOC [100%]	Eskom Holdings SOC [100.0%]	-26.032	29.6016	exact	Pullens Hope		Nkangala	Mpumalanga	https://www.gem.wiki/Hendrina_power_station	L100000103442	G100000103814	ZAG000066697	1	2000		49	2015	2055	2095	200	200	200	200	200	200	200	200	200	200	200	200
coal	South Africa	Africa	Sub-Saharan Africa	Hendrina power station	Unit 9			200	mothballed	1976	2025	subcritical	bituminous					Eskom Holdings SOC [100%]	Eskom Holdings SOC [100.0%]	-26.032	29.6016	exact	Pullens Hope		Nkangala	Mpumalanga	https://www.gem.wiki/Hendrina_power_station	L100000103442	G100000103815	ZAG000066697	1	2000	2000	48	2016	2056	2096	0	0	0	0	0	0	0	0	0	0	0	0
coal	South Africa	Africa	Sub-Saharan Africa	Kendal power station	Unit 1			686	operating	1988	2038	subcritical	bituminous					Eskom Holdings SOC [100%]	Eskom Holdings SOC [100.0%]	-26.0903	28.9688	exact	Kendal		Nkangala	Mpumalanga	https://www.gem.wiki/Kendal_power_station	L100000103443	G100000105663	ZAG000066697	1	4116		36	2028	2068	2108	686	686	686	686	686	686	686	686	686	686	686	686
coal	South Africa	Africa	Sub-Saharan Africa	Kendal power station	Unit 2			686	operating	1989	2039	subcritical	bituminous					Eskom Holdings SOC [100%]	Eskom Holdings SOC [100.0%]	-26.0903	28.9688	exact	Kendal		Nkangala	Mpumalanga	https://www.gem.wiki/Kendal_power_station	L100000103443	G100000105664	ZAG000066697	1	4116		35	2029	2069	2109	686	686	686	686	686	686	686	686	686	686	686	686
coal	South Africa	Africa	Sub-Saharan Africa	Kendal power station	Unit 3			686	operating	1990	2040	subcritical	bituminous					Eskom Holdings SOC [100%]	Eskom Holdings SOC [100.0%]	-26.0903	28.9688	exact	Kendal		Nkangala	Mpumalanga	https://www.gem.wiki/Kendal_power_station	L100000103443	G100000105665	ZAG000066697	1	4116		34	2030	2070	2110	686	686	686	686	686	686	686	686	686	686	686	686
coal	South Africa	Africa	Sub-Saharan Africa	Kendal power station	Unit 4			686	operating	1991	2041	subcritical	bituminous					Eskom Holdings SOC [100%]	Eskom Holdings SOC [100.0%]	-26.0903	28.9688	exact	Kendal		Nkangala	Mpumalanga	https://www.gem.wiki/Kendal_power_station	L100000103443	G100000105666	ZAG000066697	1	4116		33	2031	2071	2111	686	686	686	686	686	686	686	686	686	686	686	686
coal	South Africa	Africa	Sub-Saharan Africa	Kendal power station	Unit 5			686	operating	1992	2042	subcritical	bituminous					Eskom Holdings SOC [100%]	Eskom Holdings SOC [100.0%]	-26.0903	28.9688	exact	Kendal		Nkangala	Mpumalanga	https://www.gem.wiki/Kendal_power_station	L100000103443	G100000105667	ZAG000066697	1	4116		32	2032	2072	2112	686	686	686	686	686	686	686	686	686	686	686	686
coal	South Africa	Africa	Sub-Saharan Africa	Kendal power station	Unit 6			686	operating	1993	2043	subcritical	bituminous					Eskom Holdings SOC [100%]	Eskom Holdings SOC [100.0%]	-26.0903	28.9688	exact	Kendal		Nkangala	Mpumalanga	https://www.gem.wiki/Kendal_power_station	L100000103443	G100000105668	ZAG000066697	1	4116	4116	31	2033	2073	2113	686	686	686	686	686	686	686	686	686	686	686	686
coal	South Africa	Africa	Sub-Saharan Africa	Komati power station	Unit 1			100	retired	1961	2022	subcritical	bituminous					Eskom Holdings SOC [100%]	Eskom Holdings SOC [100.0%]	-26.0908	29.4745	exact	Middleburg			Mpumalanga	https://www.gem.wiki/Komati_power_station	L100000103446	G100000105828	ZAG000066697	1	1000		63	2001	2041	2081	100	100	0	0	0	0	0	0	0	0	0	0
coal	South Africa	Africa	Sub-Saharan Africa	Komati power station	Unit 2			100	retired	1962	2022	subcritical	bituminous					Eskom Holdings SOC [100%]	Eskom Holdings SOC [100.0%]	-26.0908	29.4745	exact	Middleburg			Mpumalanga	https://www.gem.wiki/Komati_power_station	L100000103446	G100000105829	ZAG000066697	1	1000		62	2002	2042	2082	100	100	0	0	0	0	0	0	0	0	0	0
coal	South Africa	Africa	Sub-Saharan Africa	Komati power station	Unit 3			100	retired	1962	2022	subcritical	bituminous					Eskom Holdings SOC [100%]	Eskom Holdings SOC [100.0%]	-26.0908	29.4745	exact	Middleburg			Mpumalanga	https://www.gem.wiki/Komati_power_station	L100000103446	G100000105830	ZAG000066697	1	1000		62	2002	2042	2082	100	100	0	0	0	0	0	0	0	0	0	0
coal	South Africa	Africa	Sub-Saharan Africa	Komati power station	Unit 4			100	retired	1963	2022	subcritical	bituminous					Eskom Holdings SOC [100%]	Eskom Holdings SOC [100.0%]	-26.0908	29.4745	exact	Middleburg			Mpumalanga	https://www.gem.wiki/Komati_power_station	L100000103446	G100000105831	ZAG000066697	1	1000		61	2003	2043	2083	100	100	0	0	0	0	0	0	0	0	0	0
coal	South Africa	Africa	Sub-Saharan Africa	Komati power station	Unit 5			100	retired	1963	2022	subcritical	bituminous					Eskom Holdings SOC [100%]	Eskom Holdings SOC [100.0%]	-26.0908	29.4745	exact	Middleburg			Mpumalanga	https://www.gem.wiki/Komati_power_station	L100000103446	G100000105832	ZAG000066697	1	1000		61	2003	2043	2083	100	100	0	0	0	0	0	0	0	0	0	0
coal	South Africa	Africa	Sub-Saharan Africa	Komati power station	Unit 6			125	retired	1964	2022	subcritical	bituminous					Eskom Holdings SOC [100%]	Eskom Holdings SOC [100.0%]	-26.0908	29.4745	exact	Middleburg			Mpumalanga	https://www.gem.wiki/Komati_power_station	L100000103446	G100000105833	ZAG000066697	1	1000		60	2004	2044	2084	125	125	0	0	0	0	0	0	0	0	0	0
coal	South Africa	Africa	Sub-Saharan Africa	Komati power station	Unit 7			125	retired	1964	2022	subcritical	bituminous					Eskom Holdings SOC [100%]	Eskom Holdings SOC [100.0%]	-26.0908	29.4745	exact	Middleburg			Mpumalanga	https://www.gem.wiki/Komati_power_station	L100000103446	G100000105834	ZAG000066697	1	1000		60	2004	2044	2084	125	125	0	0	0	0	0	0	0	0	0	0
coal	South Africa	Africa	Sub-Saharan Africa	Komati power station	Unit 8			125	retired	1964	2022	subcritical	bituminous					Eskom Holdings SOC [100%]	Eskom Holdings SOC [100.0%]	-26.0908	29.4745	exact	Middleburg			Mpumalanga	https://www.gem.wiki/Komati_power_station	L100000103446	G100000105835	ZAG000066697	1	1000		60	2004	2044	2084	125	125	0	0	0	0	0	0	0	0	0	0
coal	South Africa	Africa	Sub-Saharan Africa	Komati power station	Unit 9			125	retired	1964	2022	subcritical	bituminous					Eskom Holdings SOC [100%]	Eskom Holdings SOC [100.0%]	-26.0908	29.4745	exact	Middleburg			Mpumalanga	https://www.gem.wiki/Komati_power_station	L100000103446	G100000105836	ZAG000066697	1	1000	1000	60	2004	2044	2084	125	125	0	0	0	0	0	0	0	0	0	0
coal	South Africa	Africa	Sub-Saharan Africa	Kriel power station	Unit 1			500	operating	1976	2026	subcritical	bituminous					Eskom Holdings SOC [100%]	Eskom Holdings SOC [100.0%]	-26.2539	29.1785	exact	Kriel		Nkangala	Mpumalanga	https://www.gem.wiki/Kriel_power_station	L100000103447	G100000105964	ZAG000066697	1	3000		48	2016	2056	2096	500	500	500	500	500	500	500	500	500	500	500	500
coal	South Africa	Africa	Sub-Saharan Africa	Kriel power station	Unit 2			500	operating	1976	2027	subcritical	bituminous					Eskom Holdings SOC [100%]	Eskom Holdings SOC [100.0%]	-26.2539	29.1785	exact	Kriel		Nkangala	Mpumalanga	https://www.gem.wiki/Kriel_power_station	L100000103447	G100000105965	ZAG000066697	1	3000		48	2016	2056	2096	500	500	500	500	500	500	500	500	500	500	500	500
coal	South Africa	Africa	Sub-Saharan Africa	Kriel power station	Unit 3			500	operating	1977	2028	subcritical	bituminous					Eskom Holdings SOC [100%]	Eskom Holdings SOC [100.0%]	-26.2539	29.1785	exact	Kriel		Nkangala	Mpumalanga	https://www.gem.wiki/Kriel_power_station	L100000103447	G100000105966	ZAG000066697	1	3000		47	2017	2057	2097	500	500	500	500	500	500	500	500	500	500	500	500
coal	South Africa	Africa	Sub-Saharan Africa	Kriel power station	Unit 4			500	operating	1978	2029	subcritical	bituminous					Eskom Holdings SOC [100%]	Eskom Holdings SOC [100.0%]	-26.2539	29.1785	exact	Kriel		Nkangala	Mpumalanga	https://www.gem.wiki/Kriel_power_station	L100000103447	G100000105967	ZAG000066697	1	3000		46	2018	2058	2098	500	500	500	500	500	500	500	500	500	500	500	500
coal	South Africa	Africa	Sub-Saharan Africa	Kriel power station	Unit 5			500	operating	1979	2029	subcritical	bituminous					Eskom Holdings SOC [100%]	Eskom Holdings SOC [100.0%]	-26.2539	29.1785	exact	Kriel		Nkangala	Mpumalanga	https://www.gem.wiki/Kriel_power_station	L100000103447	G100000105968	ZAG000066697	1	3000		45	2019	2059	2099	500	500	500	500	500	500	500	500	500	500	500	500
coal	South Africa	Africa	Sub-Saharan Africa	Kriel power station	Unit 6			500	operating	1979	2030	subcritical	bituminous					Eskom Holdings SOC [100%]	Eskom Holdings SOC [100.0%]	-26.2539	29.1785	exact	Kriel		Nkangala	Mpumalanga	https://www.gem.wiki/Kriel_power_station	L100000103447	G100000105969	ZAG000066697	1	3000	3000	45	2019	2059	2099	500	500	500	500	500	500	500	500	500	500	500	500
coal	South Africa	Africa	Sub-Saharan Africa	Kusile power station	Unit 1			800	operating	2018	2069	supercritical	bituminous					Eskom Holdings SOC [100%]	Eskom Holdings SOC [100.0%]	-25.9201	28.9249	exact	Witbank			Mpumalanga	https://www.gem.wiki/Kusile_power_station	L100000103448	G100000106039	ZAG000066697	1	4800		6	2058	2098	2138	800	800	800	800	800	800	800	800	800	800	800	800
coal	South Africa	Africa	Sub-Saharan Africa	Kusile power station	Unit 2			800	operating	2020	2070	supercritical	bituminous					Eskom Holdings SOC [100%]	Eskom Holdings SOC [100.0%]	-25.9201	28.9249	exact	Witbank			Mpumalanga	https://www.gem.wiki/Kusile_power_station	L100000103448	G100000106040	ZAG000066697	1	4800		4	2060	2100	2140	800	800	800	800	800	800	800	800	800	800	800	800
coal	South Africa	Africa	Sub-Saharan Africa	Kusile power station	Unit 3			800	operating	2021	2071	supercritical	bituminous					Eskom Holdings SOC [100%]	Eskom Holdings SOC [100.0%]	-25.9201	28.9249	exact	Witbank			Mpumalanga	https://www.gem.wiki/Kusile_power_station	L100000103448	G100000106041	ZAG000066697	1	4800		3	2061	2101	2141	0	800	800	800	800	800	800	800	800	800	800	800
coal	South Africa	Africa	Sub-Saharan Africa	Kusile power station	Unit 4			800	operating	2022		supercritical	bituminous					Eskom Holdings SOC [100%]	Eskom Holdings SOC [100.0%]	-25.9201	28.9249	exact	Witbank			Mpumalanga	https://www.gem.wiki/Kusile_power_station	L100000103448	G100000106042	ZAG000066697	1	4800		2	2062	2102	2142	0	0	800	800	800	800	800	800	800	800	800	800
coal	South Africa	Africa	Sub-Saharan Africa	Kusile power station	Unit 5			800	construction	2024		supercritical	bituminous					Eskom Holdings SOC [100%]	Eskom Holdings SOC [100.0%]	-25.9201	28.9249	exact	Witbank			Mpumalanga	https://www.gem.wiki/Kusile_power_station	L100000103448	G100000106043	ZAG000066697	1	4800		0	2064	2104	2144	0	0	0	0	800	800	800	800	800	800	800	800
coal	South Africa	Africa	Sub-Saharan Africa	Kusile power station	Unit 6			800	construction	2025		supercritical	bituminous					Eskom Holdings SOC [100%]	Eskom Holdings SOC [100.0%]	-25.9201	28.9249	exact	Witbank			Mpumalanga	https://www.gem.wiki/Kusile_power_station	L100000103448	G100000106044	ZAG000066697	1	4800	4800	-1	2065	2105	2145	0	0	0	0	0	800	800	800	800	800	800	800
coal	South Africa	Africa	Sub-Saharan Africa	Lethabo power station	Unit 1			618	operating	1985	2035	subcritical	bituminous					Eskom Holdings SOC [100%]	Eskom Holdings SOC [100.0%]	-26.742	27.9769	exact	Viljoensdrif		Fezile Dabi	Free State	https://www.gem.wiki/Lethabo_power_station	L100000103423	G100000106240	ZAG000066697	1	3708		39	2025	2065	2105	618	618	618	618	618	618	618	618	618	618	618	618
coal	South Africa	Africa	Sub-Saharan Africa	Lethabo power station	Unit 2			618	operating	1986	2036	subcritical	bituminous					Eskom Holdings SOC [100%]	Eskom Holdings SOC [100.0%]	-26.742	27.9769	exact	Viljoensdrif		Fezile Dabi	Free State	https://www.gem.wiki/Lethabo_power_station	L100000103423	G100000106241	ZAG000066697	1	3708		38	2026	2066	2106	618	618	618	618	618	618	618	618	618	618	618	618
coal	South Africa	Africa	Sub-Saharan Africa	Lethabo power station	Unit 3			618	operating	1987	2037	subcritical	bituminous					Eskom Holdings SOC [100%]	Eskom Holdings SOC [100.0%]	-26.742	27.9769	exact	Viljoensdrif		Fezile Dabi	Free State	https://www.gem.wiki/Lethabo_power_station	L100000103423	G100000106242	ZAG000066697	1	3708		37	2027	2067	2107	618	618	618	618	618	618	618	618	618	618	618	618
coal	South Africa	Africa	Sub-Saharan Africa	Lethabo power station	Unit 4			618	operating	1987	2037	subcritical	bituminous					Eskom Holdings SOC [100%]	Eskom Holdings SOC [100.0%]	-26.742	27.9769	exact	Viljoensdrif		Fezile Dabi	Free State	https://www.gem.wiki/Lethabo_power_station	L100000103423	G100000106243	ZAG000066697	1	3708		37	2027	2067	2107	618	618	618	618	618	618	618	618	618	618	618	618
coal	South Africa	Africa	Sub-Saharan Africa	Lethabo power station	Unit 5			618	operating	1989	2039	subcritical	bituminous					Eskom Holdings SOC [100%]	Eskom Holdings SOC [100.0%]	-26.742	27.9769	exact	Viljoensdrif		Fezile Dabi	Free State	https://www.gem.wiki/Lethabo_power_station	L100000103423	G100000106244	ZAG000066697	1	3708		35	2029	2069	2109	618	618	618	618	618	618	618	618	618	618	618	618
coal	South Africa	Africa	Sub-Saharan Africa	Lethabo power station	Unit 6			618	operating	1990	2040	subcritical	bituminous					Eskom Holdings SOC [100%]	Eskom Holdings SOC [100.0%]	-26.742	27.9769	exact	Viljoensdrif		Fezile Dabi	Free State	https://www.gem.wiki/Lethabo_power_station	L100000103423	G100000106245	ZAG000066697	1	3708	3708	34	2030	2070	2110	618	618	618	618	618	618	618	618	618	618	618	618
coal	South Africa	Africa	Sub-Saharan Africa	Majuba power station	Unit 1			665	operating	1996	2046	subcritical	bituminous					Eskom Holdings SOC [100%]	Eskom Holdings SOC [100.0%]	-27.1006	29.771	exact	Amersfoort		Gert Sibande	Mpumalanga	https://www.gem.wiki/Majuba_power_station	L100000103449	G100000106600	ZAG000066697	1	4143		28	2036	2076	2116	665	665	665	665	665	665	665	665	665	665	665	665
coal	South Africa	Africa	Sub-Saharan Africa	Majuba power station	Unit 2			665	operating	1997	2047	subcritical	bituminous					Eskom Holdings SOC [100%]	Eskom Holdings SOC [100.0%]	-27.1006	29.771	exact	Amersfoort		Gert Sibande	Mpumalanga	https://www.gem.wiki/Majuba_power_station	L100000103449	G100000106601	ZAG000066697	1	4143		27	2037	2077	2117	665	665	665	665	665	665	665	665	665	665	665	665
coal	South Africa	Africa	Sub-Saharan Africa	Majuba power station	Unit 3			665	operating	1998	2048	subcritical	bituminous					Eskom Holdings SOC [100%]	Eskom Holdings SOC [100.0%]	-27.1006	29.771	exact	Amersfoort		Gert Sibande	Mpumalanga	https://www.gem.wiki/Majuba_power_station	L100000103449	G100000106602	ZAG000066697	1	4143		26	2038	2078	2118	665	665	665	665	665	665	665	665	665	665	665	665
coal	South Africa	Africa	Sub-Saharan Africa	Majuba power station	Unit 4			716	operating	1999	2049	subcritical	bituminous					Eskom Holdings SOC [100%]	Eskom Holdings SOC [100.0%]	-27.1006	29.771	exact	Amersfoort		Gert Sibande	Mpumalanga	https://www.gem.wiki/Majuba_power_station	L100000103449	G100000106603	ZAG000066697	1	4143		25	2039	2079	2119	716	716	716	716	716	716	716	716	716	716	716	716
coal	South Africa	Africa	Sub-Saharan Africa	Majuba power station	Unit 5			716	operating	2000	2050	subcritical	bituminous					Eskom Holdings SOC [100%]	Eskom Holdings SOC [100.0%]	-27.1006	29.771	exact	Amersfoort		Gert Sibande	Mpumalanga	https://www.gem.wiki/Majuba_power_station	L100000103449	G100000106604	ZAG000066697	1	4143		24	2040	2080	2120	716	716	716	716	716	716	716	716	716	716	716	716
coal	South Africa	Africa	Sub-Saharan Africa	Majuba power station	Unit 6			716	operating	2001	2051	subcritical	bituminous					Eskom Holdings SOC [100%]	Eskom Holdings SOC [100.0%]	-27.1006	29.771	exact	Amersfoort		Gert Sibande	Mpumalanga	https://www.gem.wiki/Majuba_power_station	L100000103449	G100000106605	ZAG000066697	1	4143	4143	23	2041	2081	2121	716	716	716	716	716	716	716	716	716	716	716	716
coal	South Africa	Africa	Sub-Saharan Africa	Matimba power station	Unit 1			665	operating	1987	2037	subcritical	bituminous					Eskom Holdings SOC [100%]	Eskom Holdings SOC [100.0%]	-23.6688	27.6108	exact	Lephalale		Waterberg	Limpopo	https://www.gem.wiki/Matimba_power_station	L100000103431	G100000106720	ZAG000066697	1	3990		37	2027	2067	2107	665	665	665	665	665	665	665	665	665	665	665	665
coal	South Africa	Africa	Sub-Saharan Africa	Matimba power station	Unit 2			665	operating	1987	2037	subcritical	bituminous					Eskom Holdings SOC [100%]	Eskom Holdings SOC [100.0%]	-23.6688	27.6108	exact	Lephalale		Waterberg	Limpopo	https://www.gem.wiki/Matimba_power_station	L100000103431	G100000106721	ZAG000066697	1	3990		37	2027	2067	2107	665	665	665	665	665	665	665	665	665	665	665	665
coal	South Africa	Africa	Sub-Saharan Africa	Matimba power station	Unit 3			665	operating	1988	2038	subcritical	bituminous					Eskom Holdings SOC [100%]	Eskom Holdings SOC [100.0%]	-23.6688	27.6108	exact	Lephalale		Waterberg	Limpopo	https://www.gem.wiki/Matimba_power_station	L100000103431	G100000106722	ZAG000066697	1	3990		36	2028	2068	2108	665	665	665	665	665	665	665	665	665	665	665	665
coal	South Africa	Africa	Sub-Saharan Africa	Matimba power station	Unit 4			665	operating	1989	2039	subcritical	bituminous					Eskom Holdings SOC [100%]	Eskom Holdings SOC [100.0%]	-23.6688	27.6108	exact	Lephalale		Waterberg	Limpopo	https://www.gem.wiki/Matimba_power_station	L100000103431	G100000106723	ZAG000066697	1	3990		35	2029	2069	2109	665	665	665	665	665	665	665	665	665	665	665	665
coal	South Africa	Africa	Sub-Saharan Africa	Matimba power station	Unit 5			665	operating	1990	2040	subcritical	bituminous					Eskom Holdings SOC [100%]	Eskom Holdings SOC [100.0%]	-23.6688	27.6108	exact	Lephalale		Waterberg	Limpopo	https://www.gem.wiki/Matimba_power_station	L100000103431	G100000106724	ZAG000066697	1	3990		34	2030	2070	2110	665	665	665	665	665	665	665	665	665	665	665	665
coal	South Africa	Africa	Sub-Saharan Africa	Matimba power station	Unit 6			665	operating	1991	2041	subcritical	bituminous					Eskom Holdings SOC [100%]	Eskom Holdings SOC [100.0%]	-23.6688	27.6108	exact	Lephalale		Waterberg	Limpopo	https://www.gem.wiki/Matimba_power_station	L100000103431	G100000106725	ZAG000066697	1	3990	3990	33	2031	2071	2111	665	665	665	665	665	665	665	665	665	665	665	665
coal	South Africa	Africa	Sub-Saharan Africa	Matla power station	Unit 1			600	operating	1979	2030	subcritical	bituminous					Eskom Holdings SOC [100%]	Eskom Holdings SOC [100.0%]	-26.2813	29.1415	exact	Kriel		Nkangala	Mpumalanga	https://www.gem.wiki/Matla_power_station	L100000103450	G100000106726	ZAG000066697	1	3600		45	2019	2059	2099	600	600	600	600	600	600	600	600	600	600	600	600
coal	South Africa	Africa	Sub-Saharan Africa	Matla power station	Unit 2			600	operating	1980	2031	subcritical	bituminous					Eskom Holdings SOC [100%]	Eskom Holdings SOC [100.0%]	-26.2813	29.1415	exact	Kriel		Nkangala	Mpumalanga	https://www.gem.wiki/Matla_power_station	L100000103450	G100000106727	ZAG000066697	1	3600		44	2020	2060	2100	600	600	600	600	600	600	600	600	600	600	600	600
coal	South Africa	Africa	Sub-Saharan Africa	Matla power station	Unit 3			600	operating	1980	2031	subcritical	bituminous					Eskom Holdings SOC [100%]	Eskom Holdings SOC [100.0%]	-26.2813	29.1415	exact	Kriel		Nkangala	Mpumalanga	https://www.gem.wiki/Matla_power_station	L100000103450	G100000106728	ZAG000066697	1	3600		44	2020	2060	2100	600	600	600	600	600	600	600	600	600	600	600	600
coal	South Africa	Africa	Sub-Saharan Africa	Matla power station	Unit 4			600	operating	1981	2032	subcritical	bituminous					Eskom Holdings SOC [100%]	Eskom Holdings SOC [100.0%]	-26.2813	29.1415	exact	Kriel		Nkangala	Mpumalanga	https://www.gem.wiki/Matla_power_station	L100000103450	G100000106729	ZAG000066697	1	3600		43	2021	2061	2101	600	600	600	600	600	600	600	600	600	600	600	600
coal	South Africa	Africa	Sub-Saharan Africa	Matla power station	Unit 5			600	operating	1982	2033	subcritical	bituminous					Eskom Holdings SOC [100%]	Eskom Holdings SOC [100.0%]	-26.2813	29.1415	exact	Kriel		Nkangala	Mpumalanga	https://www.gem.wiki/Matla_power_station	L100000103450	G100000106730	ZAG000066697	1	3600		42	2022	2062	2102	600	600	600	600	600	600	600	600	600	600	600	600
coal	South Africa	Africa	Sub-Saharan Africa	Matla power station	Unit 6			600	operating	1983	2034	subcritical	bituminous					Eskom Holdings SOC [100%]	Eskom Holdings SOC [100.0%]	-26.2813	29.1415	exact	Kriel		Nkangala	Mpumalanga	https://www.gem.wiki/Matla_power_station	L100000103450	G100000106731	ZAG000066697	1	3600	3600	41	2023	2063	2103	600	600	600	600	600	600	600	600	600	600	600	600
coal	South Africa	Africa	Sub-Saharan Africa	Medupi power station	Unit 1			794.8	operating	2021	2071	supercritical	bituminous					Eskom Holdings SOC [100%]	Eskom Holdings SOC [100.0%]	-23.705	27.5638	exact	Lephalale			Limpopo	https://www.gem.wiki/Medupi_power_station	L100000103432	G100000106780	ZAG000066697	1	4768.8		3	2061	2101	2141	0	794.8	794.8	794.8	794.8	794.8	794.8	794.8	794.8	794.8	794.8	794.8
coal	South Africa	Africa	Sub-Saharan Africa	Medupi power station	Unit 2			794.8	operating	2019	2069	supercritical	bituminous					Eskom Holdings SOC [100%]	Eskom Holdings SOC [100.0%]	-23.705	27.5638	exact	Lephalale			Limpopo	https://www.gem.wiki/Medupi_power_station	L100000103432	G100000106781	ZAG000066697	1	4768.8		5	2059	2099	2139	794.8	794.8	794.8	794.8	794.8	794.8	794.8	794.8	794.8	794.8	794.8	794.8
coal	South Africa	Africa	Sub-Saharan Africa	Medupi power station	Unit 3			794.8	operating	2019	2068	supercritical	bituminous					Eskom Holdings SOC [100%]	Eskom Holdings SOC [100.0%]	-23.705	27.5638	exact	Lephalale			Limpopo	https://www.gem.wiki/Medupi_power_station	L100000103432	G100000106782	ZAG000066697	1	4768.8		5	2059	2099	2139	794.8	794.8	794.8	794.8	794.8	794.8	794.8	794.8	794.8	794.8	794.8	794.8
coal	South Africa	Africa	Sub-Saharan Africa	Medupi power station	Unit 4			794.8	operating	2017	2067	supercritical	bituminous					Eskom Holdings SOC [100%]	Eskom Holdings SOC [100.0%]	-23.705	27.5638	exact	Lephalale			Limpopo	https://www.gem.wiki/Medupi_power_station	L100000103432	G100000106783	ZAG000066697	1	4768.8		7	2057	2097	2137	794.8	794.8	794.8	794.8	794.8	794.8	794.8	794.8	794.8	794.8	794.8	794.8
coal	South Africa	Africa	Sub-Saharan Africa	Medupi power station	Unit 5			794.8	operating	2017	2067	supercritical	bituminous					Eskom Holdings SOC [100%]	Eskom Holdings SOC [100.0%]	-23.705	27.5638	exact	Lephalale			Limpopo	https://www.gem.wiki/Medupi_power_station	L100000103432	G100000106784	ZAG000066697	1	4768.8		7	2057	2097	2137	794.8	794.8	794.8	794.8	794.8	794.8	794.8	794.8	794.8	794.8	794.8	794.8
coal	South Africa	Africa	Sub-Saharan Africa	Medupi power station	Unit 6			794.8	operating	2015	2065	supercritical	bituminous					Eskom Holdings SOC [100%]	Eskom Holdings SOC [100.0%]	-23.705	27.5638	exact	Lephalale			Limpopo	https://www.gem.wiki/Medupi_power_station	L100000103432	G100000106785	ZAG000066697	1	4768.8	4768.8	9	2055	2095	2135	794.8	794.8	794.8	794.8	794.8	794.8	794.8	794.8	794.8	794.8	794.8	794.8
coal	South Africa	Africa	Sub-Saharan Africa	Tutuka power station	Unit 1			609	operating	1985	2035	subcritical	bituminous					Eskom Holdings SOC [100%]	Eskom Holdings SOC [100.0%]	-26.7772	29.3524	exact	Standerton		Gert Sibande	Mpumalanga	https://www.gem.wiki/Tutuka_power_station	L100000103452	G100000110396	ZAG000066697	1	3654		39	2025	2065	2105	609	609	609	609	609	609	609	609	609	609	609	609
coal	South Africa	Africa	Sub-Saharan Africa	Tutuka power station	Unit 2			609	operating	1985	2035	subcritical	bituminous					Eskom Holdings SOC [100%]	Eskom Holdings SOC [100.0%]	-26.7772	29.3524	exact	Standerton		Gert Sibande	Mpumalanga	https://www.gem.wiki/Tutuka_power_station	L100000103452	G100000110397	ZAG000066697	1	3654		39	2025	2065	2105	609	609	609	609	609	609	609	609	609	609	609	609
coal	South Africa	Africa	Sub-Saharan Africa	Tutuka power station	Unit 3			609	operating	1986	2036	subcritical	bituminous					Eskom Holdings SOC [100%]	Eskom Holdings SOC [100.0%]	-26.7772	29.3524	exact	Standerton		Gert Sibande	Mpumalanga	https://www.gem.wiki/Tutuka_power_station	L100000103452	G100000110398	ZAG000066697	1	3654		38	2026	2066	2106	609	609	609	609	609	609	609	609	609	609	609	609
coal	South Africa	Africa	Sub-Saharan Africa	Tutuka power station	Unit 4			609	operating	1987	2037	subcritical	bituminous					Eskom Holdings SOC [100%]	Eskom Holdings SOC [100.0%]	-26.7772	29.3524	exact	Standerton		Gert Sibande	Mpumalanga	https://www.gem.wiki/Tutuka_power_station	L100000103452	G100000110399	ZAG000066697	1	3654		37	2027	2067	2107	609	609	609	609	609	609	609	609	609	609	609	609
coal	South Africa	Africa	Sub-Saharan Africa	Tutuka power station	Unit 5			609	operating	1988	2038	subcritical	bituminous					Eskom Holdings SOC [100%]	Eskom Holdings SOC [100.0%]	-26.7772	29.3524	exact	Standerton		Gert Sibande	Mpumalanga	https://www.gem.wiki/Tutuka_power_station	L100000103452	G100000110400	ZAG000066697	1	3654		36	2028	2068	2108	609	609	609	609	609	609	609	609	609	609	609	609
coal	South Africa	Africa	Sub-Saharan Africa	Tutuka power station	Unit 6			609	operating	1990	2040	subcritical	bituminous					Eskom Holdings SOC [100%]	Eskom Holdings SOC [100.0%]	-26.7772	29.3524	exact	Standerton		Gert Sibande	Mpumalanga	https://www.gem.wiki/Tutuka_power_station	L100000103452	G100000110401	ZAG000066697	1	3654	3654	34	2030	2070	2110	609	609	609	609	609	609	609	609	609	609	609	609
oil/gas	South Africa	Africa	Sub-Saharan Africa	Acacia power station	1			57	operating	1976		GT	KER					Eskom Holdings SOC Ltd [100.0%]	Eskom Holdings SOC Ltd [100.0%]	-33.8831	18.5358	exact	Cape Town			Western Cape	https://www.gem.wiki/Acacia_power_station	L100000408170	G100000411354	ZAG000066697	1	171		48	2016	2056	2096	57	57	57	57	57	57	57	57	57	57	57	57
oil/gas	South Africa	Africa	Sub-Saharan Africa	Acacia power station	2			57	operating	1976		GT	KER					Eskom Holdings SOC Ltd [100.0%]	Eskom Holdings SOC Ltd [100.0%]	-33.8831	18.5358	exact	Cape Town			Western Cape	https://www.gem.wiki/Acacia_power_station	L100000408170	G100000411353	ZAG000066697	1	171		48	2016	2056	2096	57	57	57	57	57	57	57	57	57	57	57	57
oil/gas	South Africa	Africa	Sub-Saharan Africa	Acacia power station	3			57	operating	1976		GT	KER					Eskom Holdings SOC Ltd [100.0%]	Eskom Holdings SOC Ltd [100.0%]	-33.8831	18.5358	exact	Cape Town			Western Cape	https://www.gem.wiki/Acacia_power_station	L100000408170	G100000411352	ZAG000066697	1	171	171	48	2016	2056	2096	57	57	57	57	57	57	57	57	57	57	57	57
oil/gas	South Africa	Africa	Sub-Saharan Africa	Ankerlig power station	1-1			149.2	operating	2007		GT	D					Eskom Holdings SOC Ltd [100.0%]	Eskom Holdings SOC Ltd [100.0%]	-33.5895	18.4615	exact	Atlantis			Western Cape	https://www.gem.wiki/Ankerlig_power_station	L100000407107	G100000408556	ZAG000066697	1	1338.3		17	2047	2087	2127	149.2	149.2	149.2	149.2	149.2	149.2	149.2	149.2	149.2	149.2	149.2	149.2
oil/gas	South Africa	Africa	Sub-Saharan Africa	Ankerlig power station	1-2			149.2	operating	2007		GT	D					Eskom Holdings SOC Ltd [100.0%]	Eskom Holdings SOC Ltd [100.0%]	-33.5895	18.4615	exact	Atlantis			Western Cape	https://www.gem.wiki/Ankerlig_power_station	L100000407107	G100000414357	ZAG000066697	1	1338.3		17	2047	2087	2127	149.2	149.2	149.2	149.2	149.2	149.2	149.2	149.2	149.2	149.2	149.2	149.2
oil/gas	South Africa	Africa	Sub-Saharan Africa	Ankerlig power station	1-3			149.2	operating	2007		GT	D					Eskom Holdings SOC Ltd [100.0%]	Eskom Holdings SOC Ltd [100.0%]	-33.5895	18.4615	exact	Atlantis			Western Cape	https://www.gem.wiki/Ankerlig_power_station	L100000407107	G100000414356	ZAG000066697	1	1338.3		17	2047	2087	2127	149.2	149.2	149.2	149.2	149.2	149.2	149.2	149.2	149.2	149.2	149.2	149.2
oil/gas	South Africa	Africa	Sub-Saharan Africa	Ankerlig power station	1-4			149.2	operating	2007		GT	D					Eskom Holdings SOC Ltd [100.0%]	Eskom Holdings SOC Ltd [100.0%]	-33.5895	18.4615	exact	Atlantis			Western Cape	https://www.gem.wiki/Ankerlig_power_station	L100000407107	G100000414355	ZAG000066697	1	1338.3		17	2047	2087	2127	149.2	149.2	149.2	149.2	149.2	149.2	149.2	149.2	149.2	149.2	149.2	149.2
oil/gas	South Africa	Africa	Sub-Saharan Africa	Ankerlig power station	2-1			148.3	operating	2009		GT	D					Eskom Holdings SOC Ltd [100.0%]	Eskom Holdings SOC Ltd [100.0%]	-33.5895	18.4615	exact	Atlantis			Western Cape	https://www.gem.wiki/Ankerlig_power_station	L100000407107	G100000413925	ZAG000066697	1	1338.3		15	2049	2089	2129	148.3	148.3	148.3	148.3	148.3	148.3	148.3	148.3	148.3	148.3	148.3	148.3
oil/gas	South Africa	Africa	Sub-Saharan Africa	Ankerlig power station	2-2			148.3	operating	2009		GT	D					Eskom Holdings SOC Ltd [100.0%]	Eskom Holdings SOC Ltd [100.0%]	-33.5895	18.4615	exact	Atlantis			Western Cape	https://www.gem.wiki/Ankerlig_power_station	L100000407107	G100000414354	ZAG000066697	1	1338.3		15	2049	2089	2129	148.3	148.3	148.3	148.3	148.3	148.3	148.3	148.3	148.3	148.3	148.3	148.3
oil/gas	South Africa	Africa	Sub-Saharan Africa	Ankerlig power station	2-3			148.3	operating	2009		GT	D					Eskom Holdings SOC Ltd [100.0%]	Eskom Holdings SOC Ltd [100.0%]	-33.5895	18.4615	exact	Atlantis			Western Cape	https://www.gem.wiki/Ankerlig_power_station	L100000407107	G100000414353	ZAG000066697	1	1338.3		15	2049	2089	2129	148.3	148.3	148.3	148.3	148.3	148.3	148.3	148.3	148.3	148.3	148.3	148.3
oil/gas	South Africa	Africa	Sub-Saharan Africa	Ankerlig power station	2-4			148.3	operating	2009		GT	D					Eskom Holdings SOC Ltd [100.0%]	Eskom Holdings SOC Ltd [100.0%]	-33.5895	18.4615	exact	Atlantis			Western Cape	https://www.gem.wiki/Ankerlig_power_station	L100000407107	G100000414352	ZAG000066697	1	1338.3		15	2049	2089	2129	148.3	148.3	148.3	148.3	148.3	148.3	148.3	148.3	148.3	148.3	148.3	148.3
oil/gas	South Africa	Africa	Sub-Saharan Africa	Ankerlig power station	2-5			148.3	operating	2009		GT	D					Eskom Holdings SOC Ltd [100.0%]	Eskom Holdings SOC Ltd [100.0%]	-33.5895	18.4615	exact	Atlantis			Western Cape	https://www.gem.wiki/Ankerlig_power_station	L100000407107	G100000414351	ZAG000066697	1	1338.3	1338.3	15	2049	2089	2129	148.3	148.3	148.3	148.3	148.3	148.3	148.3	148.3	148.3	148.3	148.3	148.3
oil/gas	South Africa	Africa	Sub-Saharan Africa	Gourikwa power station	1			148	operating	2007		GT	D					Eskom Holdings SOC Ltd [100.0%]	Eskom Holdings SOC Ltd [100.0%]	-34.1668	21.9607	exact	Mossel Bay			Western Cape	https://www.gem.wiki/Gourikwa_power_station	L100000407108	G100000408557	ZAG000066697	1	740		17	2047	2087	2127	148	148	148	148	148	148	148	148	148	148	148	148
oil/gas	South Africa	Africa	Sub-Saharan Africa	Gourikwa power station	2			148	operating	2007		GT	D					Eskom Holdings SOC Ltd [100.0%]	Eskom Holdings SOC Ltd [100.0%]	-34.1668	21.9607	exact	Mossel Bay			Western Cape	https://www.gem.wiki/Gourikwa_power_station	L100000407108	G100000410887	ZAG000066697	1	740		17	2047	2087	2127	148	148	148	148	148	148	148	148	148	148	148	148
oil/gas	South Africa	Africa	Sub-Saharan Africa	Gourikwa power station	3			148	operating	2007		GT	D					Eskom Holdings SOC Ltd [100.0%]	Eskom Holdings SOC Ltd [100.0%]	-34.1668	21.9607	exact	Mossel Bay			Western Cape	https://www.gem.wiki/Gourikwa_power_station	L100000407108	G100000410886	ZAG000066697	1	740		17	2047	2087	2127	148	148	148	148	148	148	148	148	148	148	148	148
oil/gas	South Africa	Africa	Sub-Saharan Africa	Gourikwa power station	4			148	operating	2009		GT	D					Eskom Holdings SOC Ltd [100.0%]	Eskom Holdings SOC Ltd [100.0%]	-34.1668	21.9607	exact	Mossel Bay			Western Cape	https://www.gem.wiki/Gourikwa_power_station	L100000407108	G100000410885	ZAG000066697	1	740		15	2049	2089	2129	148	148	148	148	148	148	148	148	148	148	148	148
oil/gas	South Africa	Africa	Sub-Saharan Africa	Gourikwa power station	5			148	operating	2009		GT	D					Eskom Holdings SOC Ltd [100.0%]	Eskom Holdings SOC Ltd [100.0%]	-34.1668	21.9607	exact	Mossel Bay			Western Cape	https://www.gem.wiki/Gourikwa_power_station	L100000407108	G100000410884	ZAG000066697	1	740	740	15	2049	2089	2129	148	148	148	148	148	148	148	148	148	148	148	148
oil/gas	South Africa	Africa	Sub-Saharan Africa	Port Rex power station	4			57	operating	1976		GT	KER					Eskom Holdings SOC Ltd [100.0%]	Eskom Holdings SOC Ltd [100.0%]	-33.028	27.8818	exact	East London				https://www.gem.wiki/Port_Rex_power_station	L100000408172	G100000411351	ZAG000066697	1	171		48	2016	2056	2096	57	57	57	57	57	57	57	57	57	57	57	57
oil/gas	South Africa	Africa	Sub-Saharan Africa	Port Rex power station	5			57	operating	1976		GT	KER					Eskom Holdings SOC Ltd [100.0%]	Eskom Holdings SOC Ltd [100.0%]	-33.028	27.8818	exact	East London				https://www.gem.wiki/Port_Rex_power_station	L100000408172	G100000411350	ZAG000066697	1	171		48	2016	2056	2096	57	57	57	57	57	57	57	57	57	57	57	57
oil/gas	South Africa	Africa	Sub-Saharan Africa	Port Rex power station	6			57	operating	1976		GT	KER					Eskom Holdings SOC Ltd [100.0%]	Eskom Holdings SOC Ltd [100.0%]	-33.028	27.8818	exact	East London				https://www.gem.wiki/Port_Rex_power_station	L100000408172	G100000411349	ZAG000066697	1	171	171	48	2016	2056	2096	57	57	57	57	57	57	57	57	57	57	57	57
oil/gas	South Africa	Africa	Sub-Saharan Africa	Richards Bay (Eskom) power station	1			3000	pre-construction			CC	LNG					Eskom Holdings SOC Ltd [100.0%]	Eskom Holdings SOC Ltd [100.0%]	-28.771	31.9765	exact	Richards Bay			KwaZulu-Natal	https://www.gem.wiki/Richards_Bay_(Eskom)_power_station	L100000407360	G100000409408	ZAG000066697	1	3000	3000	-99	40	80	120	0	0	0	0	0	0	0	0	0	3000	3000	3000
wind	South Africa	Africa	Sub-Saharan Africa	Komati wind farm			Komati Just Energy Transition Project	70	pre-construction			onshore						Eskom		-26.0905	29.4718	approximate					https://gem.wiki/Komati_wind_farm	L922011	G927425	ZAG000066697	1	70	70	-99	40	80	120	0	0	0	0	0	0	0	0	0	0	0	0
wind	South Africa	Africa	Sub-Saharan Africa	Sere wind farm	1			100	operating	2015		onshore						Eskom		-31.5296	18.0943	exact	Matzikama Local Municipality	West Coast District Municipality		Western Cape	https://gem.wiki/Sere_wind_farm	L900027	G900029	ZAG000066697	1	100	100	9	2055	2095	2135	100	100	100	100	100	100	100	100	100	100	100	100
nuclear	South Africa	Africa	Sub-Saharan Africa	Koeberg nuclear power plant	1			970	operating	1984		pressurized water reactor						Eskom		-33.6746	18.4321	exact		City of Cape Town		Western Cape	https://gem.wiki/Koeberg_nuclear_power_plant	L500139	G500317	ZAG000066697	1	1940		40	2024	2064	2104	970	970	970	970	970	970	970	970	970	970	970	970
nuclear	South Africa	Africa	Sub-Saharan Africa	Koeberg nuclear power plant	2			970	operating	1985		pressurized water reactor						Eskom		-33.6746	18.4321	exact		City of Cape Town		Western Cape	https://gem.wiki/Koeberg_nuclear_power_plant	L500139	G500318	ZAG000066697	1	1940	1940	39	2025	2065	2105	970	970	970	970	970	970	970	970	970	970	970	970
hydropower	South Africa	Africa	Sub-Saharan Africa	Drakensberg hydroelectric plant				1000	operating	1982		pumped storage				TRUE	FALSE	Eskom		-28.566	29.0834	exact	Okhahlamba Local Municipality	Uthukela District Municipality		KwaZulu-Natal	https://gem.wiki/Drakensberg_hydroelectric_plant	L603315	G603350	ZAG000066697	1	1000	1000	42	2022	2062	2102	1000	1000	1000	1000	1000	1000	1000	1000	1000	1000	1000	1000
hydropower	South Africa	Africa	Sub-Saharan Africa	Ingula hydroelectric plant				1332	operating	2016		pumped storage				TRUE	FALSE	Eskom		-28.2809	29.588	exact	Emnambithi/Ladysmith Local Municipality	Uthukela District Municipality		KwaZulu-Natal	https://gem.wiki/Ingula_hydroelectric_plant	L603317	G603352	ZAG000066697	1	1332	1332	8	2056	2096	2136	1332	1332	1332	1332	1332	1332	1332	1332	1332	1332	1332	1332
hydropower	South Africa	Africa	Sub-Saharan Africa	Palmiet hydroelectric plant				400	operating	1988		pumped storage				TRUE	FALSE	Eskom		-34.1985	18.9746	exact	Theewaterskloof Local Municipality	Overberg District Municipality		Western Cape	https://gem.wiki/Palmiet_hydroelectric_plant	L603318	G603353	ZAG000066697	1	400	400	36	2028	2068	2108	400	400	400	400	400	400	400	400	400	400	400	400
hydropower	South Africa	Africa	Sub-Saharan Africa	Tubatse hydroelectric plant				1500	announced			pumped storage				TRUE	FALSE	Eskom		-24.8058	30.1118	exact	Greater Tubatse Local Municipality	Sekhukhune District Municipality		Limpopo	https://gem.wiki/Tubatse_hydroelectric_plant	L603320	G604895	ZAG000066697	1	1500	1500	-99	40	80	120	0	0	0	0	0	0	0	0	0	0	0	0
																																		14367	14367	0	0	48929.3	50524.1	50324.1	50324.1	51124.1	51924.1	51924.1	51924.1	51924.1	54924.1	54924.1	54924.1
																																					Coal	41737	43331.8	43131.8	43131.8	43931.8	44731.8	44731.8	44731.8	44731.8	44731.8	44731.8	44731.8
																																					Oil&Gas	2420.3	2420.3	2420.3	2420.3	2420.3	2420.3	2420.3	2420.3	2420.3	5420.3	5420.3	5420.3
																																					Fossil fuel	44157.3	45752.1	45552.1	45552.1	46352.1	47152.1	47152.1	47152.1	47152.1	50152.1	50152.1	50152.1
																																					Renewables	2832	2832	2832	2832	2832	2832	2832	2832	2832	2832	2832	2832
																																					Oil	0	0	0	0	0	0	0	0	0	0	0	0
																																					Gas	0	0	0	0	0	0	0	0	0	3000	3000	3000
																																					Nuclear	1940	1940	1940	1940	1940	1940	1940	1940	1940	1940	1940	1940
																																					Wind	100	100	100	100	100	100	100	100	100	100	100	100
																																					solar	0	0	0	0	0	0	0	0	0	0	0	0
																																					hydropower	2732	2732	2732	2732	2732	2732	2732	2732	2732	2732	2732	2732
																																					Total capacity without discounts	48929.3	50524.1	50324.1	50324.1
																																					Total capacity without discounts	44157.3	45752.1	45552.1	45552.1
[truncated: 19 more columns]

## Sheet: Eskom_TP
Type	Country/area	Region	Subregion	Plant / Project name	Unit / Phase name	Plant / Project name (local)	Plant / Project name (other)	Capacity (MW)	Status	Start year	Retired year	Technology	Fuel	Country/area 1 (hydropower only)	Country/area 2 (hydropower only)	Country/area 1 Capacity (MW) (hydropower only)	Country/area 2 Capacity (MW) (hydropower only)	Owner	Parent	Latitude	Longitude	Location accuracy	City	Local area (taluk, county)	Major area (prefecture, district)	Subnational unit (state, province)	GEM.Wiki URL	GEM location ID	GEM unit/phase ID	CompISIN	Ownership	Plant capacity	Plant capacity	Age	Reinvestment year	Reinvestment year	Reinvestment year	2020	2021	2022	2023	2024	2025	2026	2027	2028	2029	2030	2031
coal	South Africa	Africa	Sub-Saharan Africa	Arnot power station	Unit 1			370	operating	1972	2026	subcritical	bituminous					Eskom Holdings SOC [100%]	Eskom Holdings SOC [100.0%]	-25.9438	29.792	exact	Rietkuil		Nkangala	Mpumalanga	https://www.gem.wiki/Arnot_power_station	L100000103438	G100000100348	ZAG000066697	1	2352		52	2012	2052	2092	370	370	370	370	370	370	370	370	370	370	370	370
coal	South Africa	Africa	Sub-Saharan Africa	Arnot power station	Unit 2			390	operating	1971	2026	subcritical	bituminous					Eskom Holdings SOC [100%]	Eskom Holdings SOC [100.0%]	-25.9438	29.792	exact	Rietkuil		Nkangala	Mpumalanga	https://www.gem.wiki/Arnot_power_station	L100000103438	G100000100349	ZAG000066697	1	2352		53	2011	2051	2091	390	390	390	390	390	390	390	390	390	390	390	390
coal	South Africa	Africa	Sub-Saharan Africa	Arnot power station	Unit 3			396	operating	1971	2026	subcritical	bituminous					Eskom Holdings SOC [100%]	Eskom Holdings SOC [100.0%]	-25.9438	29.792	exact	Rietkuil		Nkangala	Mpumalanga	https://www.gem.wiki/Arnot_power_station	L100000103438	G100000100350	ZAG000066697	1	2352		53	2011	2051	2091	396	396	396	396	396	396	396	396	396	396	396	396
coal	South Africa	Africa	Sub-Saharan Africa	Arnot power station	Unit 4			396	operating	1973	2027	subcritical	bituminous					Eskom Holdings SOC [100%]	Eskom Holdings SOC [100.0%]	-25.9438	29.792	exact	Rietkuil		Nkangala	Mpumalanga	https://www.gem.wiki/Arnot_power_station	L100000103438	G100000100351	ZAG000066697	1	2352		51	2013	2053	2093	396	396	396	396	396	396	396	396	396	396	396	396
coal	South Africa	Africa	Sub-Saharan Africa	Arnot power station	Unit 5			400	operating	1974	2029	subcritical	bituminous					Eskom Holdings SOC [100%]	Eskom Holdings SOC [100.0%]	-25.9438	29.792	exact	Rietkuil		Nkangala	Mpumalanga	https://www.gem.wiki/Arnot_power_station	L100000103438	G100000100352	ZAG000066697	1	2352		50	2014	2054	2094	400	400	400	400	400	400	400	400	400	400	400	400
coal	South Africa	Africa	Sub-Saharan Africa	Arnot power station	Unit 6			400	operating	1975	2029	subcritical	bituminous					Eskom Holdings SOC [100%]	Eskom Holdings SOC [100.0%]	-25.9438	29.792	exact	Rietkuil		Nkangala	Mpumalanga	https://www.gem.wiki/Arnot_power_station	L100000103438	G100000100353	ZAG000066697	1	2352	2352	49	2015	2055	2095	400	400	400	400	400	400	400	400	400	400	400	400
coal	South Africa	Africa	Sub-Saharan Africa	Camden power station	Unit 1			200	operating	1968	2025	subcritical	bituminous					Eskom Holdings SOC [100%]	Eskom Holdings SOC [100.0%]	-26.6215	30.0901	exact	Camden		Gert Sibande	Mpumalanga	https://www.gem.wiki/Camden_power_station	L100000103439	G100000101168	ZAG000066697	1	1600		56	2008	2048	2088	200	200	200	200	200	200	200	200	200	200	200	200
coal	South Africa	Africa	Sub-Saharan Africa	Camden power station	Unit 2			200	operating	1967	2025	subcritical	bituminous					Eskom Holdings SOC [100%]	Eskom Holdings SOC [100.0%]	-26.6215	30.0901	exact	Camden		Gert Sibande	Mpumalanga	https://www.gem.wiki/Camden_power_station	L100000103439	G100000101169	ZAG000066697	1	1600		57	2007	2047	2087	200	200	200	200	200	200	200	200	200	200	200	200
coal	South Africa	Africa	Sub-Saharan Africa	Camden power station	Unit 3			200	operating	1967	2025	subcritical	bituminous					Eskom Holdings SOC [100%]	Eskom Holdings SOC [100.0%]	-26.6215	30.0901	exact	Camden		Gert Sibande	Mpumalanga	https://www.gem.wiki/Camden_power_station	L100000103439	G100000101170	ZAG000066697	1	1600		57	2007	2047	2087	200	200	200	200	200	200	200	200	200	200	200	200
coal	South Africa	Africa	Sub-Saharan Africa	Camden power station	Unit 4			200	operating	1967	2025	subcritical	bituminous					Eskom Holdings SOC [100%]	Eskom Holdings SOC [100.0%]	-26.6215	30.0901	exact	Camden		Gert Sibande	Mpumalanga	https://www.gem.wiki/Camden_power_station	L100000103439	G100000101171	ZAG000066697	1	1600		57	2007	2047	2087	200	200	200	200	200	200	200	200	200	200	200	200
coal	South Africa	Africa	Sub-Saharan Africa	Camden power station	Unit 5			200	operating	1967	2025	subcritical	bituminous					Eskom Holdings SOC [100%]	Eskom Holdings SOC [100.0%]	-26.6215	30.0901	exact	Camden		Gert Sibande	Mpumalanga	https://www.gem.wiki/Camden_power_station	L100000103439	G100000101172	ZAG000066697	1	1600		57	2007	2047	2087	200	200	200	200	200	200	200	200	200	200	200	200
coal	South Africa	Africa	Sub-Saharan Africa	Camden power station	Unit 6			200	operating	1968	2025	subcritical	bituminous					Eskom Holdings SOC [100%]	Eskom Holdings SOC [100.0%]	-26.6215	30.0901	exact	Camden		Gert Sibande	Mpumalanga	https://www.gem.wiki/Camden_power_station	L100000103439	G100000101173	ZAG000066697	1	1600		56	2008	2048	2088	200	200	200	200	200	200	200	200	200	200	200	200
coal	South Africa	Africa	Sub-Saharan Africa	Camden power station	Unit 7			200	operating	1969	2025	subcritical	bituminous					Eskom Holdings SOC [100%]	Eskom Holdings SOC [100.0%]	-26.6215	30.0901	exact	Camden		Gert Sibande	Mpumalanga	https://www.gem.wiki/Camden_power_station	L100000103439	G100000101174	ZAG000066697	1	1600		55	2009	2049	2089	200	200	200	200	200	200	200	200	200	200	200	200
coal	South Africa	Africa	Sub-Saharan Africa	Camden power station	Unit 8			200	operating	1969	2025	subcritical	bituminous					Eskom Holdings SOC [100%]	Eskom Holdings SOC [100.0%]	-26.6215	30.0901	exact	Camden		Gert Sibande	Mpumalanga	https://www.gem.wiki/Camden_power_station	L100000103439	G100000101175	ZAG000066697	1	1600	1600	55	2009	2049	2089	200	200	200	200	200	200	200	200	200	200	200	200
coal	South Africa	Africa	Sub-Saharan Africa	Duvha power station	Unit 1			600	operating	1980	2031	subcritical	bituminous					Eskom Holdings SOC [100%]	Eskom Holdings SOC [100.0%]	-25.9613	29.3397	exact	Witbank		Nkangala	Mpumalanga	https://www.gem.wiki/Duvha_power_station	L100000103440	G100000102524	ZAG000066697	1	3600		44	2020	2060	2100	600	600	600	600	600	600	600	600	600	600	600	600
coal	South Africa	Africa	Sub-Saharan Africa	Duvha power station	Unit 2			600	operating	1980	2031	subcritical	bituminous					Eskom Holdings SOC [100%]	Eskom Holdings SOC [100.0%]	-25.9613	29.3397	exact	Witbank		Nkangala	Mpumalanga	https://www.gem.wiki/Duvha_power_station	L100000103440	G100000102525	ZAG000066697	1	3600		44	2020	2060	2100	600	600	600	600	600	600	600	600	600	600	600	600
coal	South Africa	Africa	Sub-Saharan Africa	Duvha power station	Unit 3			600	mothballed	1981	2032	subcritical	bituminous					Eskom Holdings SOC [100%]	Eskom Holdings SOC [100.0%]	-25.9613	29.3397	exact	Witbank		Nkangala	Mpumalanga	https://www.gem.wiki/Duvha_power_station	L100000103440	G100000102526	ZAG000066697	1	3600		43	2021	2061	2101	0	0	0	0	0	0	0	0	0	0	0	0
coal	South Africa	Africa	Sub-Saharan Africa	Duvha power station	Unit 4			600	operating	1982	2033	subcritical	bituminous					Eskom Holdings SOC [100%]	Eskom Holdings SOC [100.0%]	-25.9613	29.3397	exact	Witbank		Nkangala	Mpumalanga	https://www.gem.wiki/Duvha_power_station	L100000103440	G100000102527	ZAG000066697	1	3600		42	2022	2062	2102	600	600	600	600	600	600	600	600	600	600	600	600
coal	South Africa	Africa	Sub-Saharan Africa	Duvha power station	Unit 5			600	operating	1983	2033	subcritical	bituminous					Eskom Holdings SOC [100%]	Eskom Holdings SOC [100.0%]	-25.9613	29.3397	exact	Witbank		Nkangala	Mpumalanga	https://www.gem.wiki/Duvha_power_station	L100000103440	G100000102528	ZAG000066697	1	3600		41	2023	2063	2103	600	600	600	600	600	600	600	600	600	600	600	600
coal	South Africa	Africa	Sub-Saharan Africa	Duvha power station	Unit 6			600	operating	1984	2034	subcritical	bituminous					Eskom Holdings SOC [100%]	Eskom Holdings SOC [100.0%]	-25.9613	29.3397	exact	Witbank		Nkangala	Mpumalanga	https://www.gem.wiki/Duvha_power_station	L100000103440	G100000102529	ZAG000066697	1	3600	3600	40	2024	2064	2104	600	600	600	600	600	600	600	600	600	600	600	600
coal	South Africa	Africa	Sub-Saharan Africa	Grootvlei power station	Unit 1			200	operating	1973	2027	subcritical	bituminous					Eskom Holdings SOC [100%]	Eskom Holdings SOC [100.0%]	-26.7685	28.4978	exact	Grootvlei		Gert Sibande	Mpumalanga	https://www.gem.wiki/Grootvlei_power_station	L100000103441	G100000103136	ZAG000066697	1	1190		51	2013	2053	2093	200	200	200	200	200	200	200	200	200	200	200	200
coal	South Africa	Africa	Sub-Saharan Africa	Grootvlei power station	Unit 2			200	operating	1970	2027	subcritical	bituminous					Eskom Holdings SOC [100%]	Eskom Holdings SOC [100.0%]	-26.7685	28.4978	exact	Grootvlei		Gert Sibande	Mpumalanga	https://www.gem.wiki/Grootvlei_power_station	L100000103441	G100000103137	ZAG000066697	1	1190		54	2010	2050	2090	200	200	200	200	200	200	200	200	200	200	200	200
coal	South Africa	Africa	Sub-Saharan Africa	Grootvlei power station	Unit 3			200	operating	1969	2027	subcritical	bituminous					Eskom Holdings SOC [100%]	Eskom Holdings SOC [100.0%]	-26.7685	28.4978	exact	Grootvlei		Gert Sibande	Mpumalanga	https://www.gem.wiki/Grootvlei_power_station	L100000103441	G100000103138	ZAG000066697	1	1190		55	2009	2049	2089	200	200	200	200	200	200	200	200	200	200	200	200
coal	South Africa	Africa	Sub-Saharan Africa	Grootvlei power station	Unit 4			200	mothballed	1969	2025	subcritical	bituminous					Eskom Holdings SOC [100%]	Eskom Holdings SOC [100.0%]	-26.7685	28.4978	exact	Grootvlei		Gert Sibande	Mpumalanga	https://www.gem.wiki/Grootvlei_power_station	L100000103441	G100000103139	ZAG000066697	1	1190		55	2009	2049	2089	0	0	0	0	0	0	0	0	0	0	0	0
coal	South Africa	Africa	Sub-Saharan Africa	Grootvlei power station	Unit 5			190	mothballed	1971	2025	subcritical	bituminous					Eskom Holdings SOC [100%]	Eskom Holdings SOC [100.0%]	-26.7685	28.4978	exact	Grootvlei		Gert Sibande	Mpumalanga	https://www.gem.wiki/Grootvlei_power_station	L100000103441	G100000103140	ZAG000066697	1	1190		53	2011	2051	2091	0	0	0	0	0	0	0	0	0	0	0	0
coal	South Africa	Africa	Sub-Saharan Africa	Grootvlei power station	Unit 6			200	mothballed	1977	2025	subcritical	bituminous					Eskom Holdings SOC [100%]	Eskom Holdings SOC [100.0%]	-26.7685	28.4978	exact	Grootvlei		Gert Sibande	Mpumalanga	https://www.gem.wiki/Grootvlei_power_station	L100000103441	G100000103141	ZAG000066697	1	1190	1190	47	2017	2057	2097	0	0	0	0	0	0	0	0	0	0	0	0
coal	South Africa	Africa	Sub-Saharan Africa	Hendrina power station	Unit 1			200	mothballed	1972	2025	subcritical	bituminous					Eskom Holdings SOC [100%]	Eskom Holdings SOC [100.0%]	-26.032	29.6016	exact	Pullens Hope		Nkangala	Mpumalanga	https://www.gem.wiki/Hendrina_power_station	L100000103442	G100000103806	ZAG000066697	1	2000		52	2012	2052	2092	0	0	0	0	0	0	0	0	0	0	0	0
coal	South Africa	Africa	Sub-Saharan Africa	Hendrina power station	Unit 10			200	operating	1977	2025	subcritical	bituminous					Eskom Holdings SOC [100%]	Eskom Holdings SOC [100.0%]	-26.032	29.6016	exact	Pullens Hope		Nkangala	Mpumalanga	https://www.gem.wiki/Hendrina_power_station	L100000103442	G100000103807	ZAG000066697	1	2000		47	2017	2057	2097	200	200	200	200	200	200	200	200	200	200	200	200
coal	South Africa	Africa	Sub-Saharan Africa	Hendrina power station	Unit 2			200	operating	1971	2025	subcritical	bituminous					Eskom Holdings SOC [100%]	Eskom Holdings SOC [100.0%]	-26.032	29.6016	exact	Pullens Hope		Nkangala	Mpumalanga	https://www.gem.wiki/Hendrina_power_station	L100000103442	G100000103808	ZAG000066697	1	2000		53	2011	2051	2091	200	200	200	200	200	200	200	200	200	200	200	200
coal	South Africa	Africa	Sub-Saharan Africa	Hendrina power station	Unit 3			200	mothballed	1970	2025	subcritical	bituminous					Eskom Holdings SOC [100%]	Eskom Holdings SOC [100.0%]	-26.032	29.6016	exact	Pullens Hope		Nkangala	Mpumalanga	https://www.gem.wiki/Hendrina_power_station	L100000103442	G100000103809	ZAG000066697	1	2000		54	2010	2050	2090	0	0	0	0	0	0	0	0	0	0	0	0
coal	South Africa	Africa	Sub-Saharan Africa	Hendrina power station	Unit 4			200	operating	1970	2025	subcritical	bituminous					Eskom Holdings SOC [100%]	Eskom Holdings SOC [100.0%]	-26.032	29.6016	exact	Pullens Hope		Nkangala	Mpumalanga	https://www.gem.wiki/Hendrina_power_station	L100000103442	G100000103810	ZAG000066697	1	2000		54	2010	2050	2090	200	200	200	200	200	200	200	200	200	200	200	200
coal	South Africa	Africa	Sub-Saharan Africa	Hendrina power station	Unit 5			200	operating	1971	2025	subcritical	bituminous					Eskom Holdings SOC [100%]	Eskom Holdings SOC [100.0%]	-26.032	29.6016	exact	Pullens Hope		Nkangala	Mpumalanga	https://www.gem.wiki/Hendrina_power_station	L100000103442	G100000103811	ZAG000066697	1	2000		53	2011	2051	2091	200	200	200	200	200	200	200	200	200	200	200	200
coal	South Africa	Africa	Sub-Saharan Africa	Hendrina power station	Unit 6			200	operating	1973	2025	subcritical	bituminous					Eskom Holdings SOC [100%]	Eskom Holdings SOC [100.0%]	-26.032	29.6016	exact	Pullens Hope		Nkangala	Mpumalanga	https://www.gem.wiki/Hendrina_power_station	L100000103442	G100000103812	ZAG000066697	1	2000		51	2013	2053	2093	200	200	200	200	200	200	200	200	200	200	200	200
coal	South Africa	Africa	Sub-Saharan Africa	Hendrina power station	Unit 7			200	operating	1974	2025	subcritical	bituminous					Eskom Holdings SOC [100%]	Eskom Holdings SOC [100.0%]	-26.032	29.6016	exact	Pullens Hope		Nkangala	Mpumalanga	https://www.gem.wiki/Hendrina_power_station	L100000103442	G100000103813	ZAG000066697	1	2000		50	2014	2054	2094	200	200	200	200	200	200	200	200	200	200	200	200
coal	South Africa	Africa	Sub-Saharan Africa	Hendrina power station	Unit 8			200	operating	1975	2025	subcritical	bituminous					Eskom Holdings SOC [100%]	Eskom Holdings SOC [100.0%]	-26.032	29.6016	exact	Pullens Hope		Nkangala	Mpumalanga	https://www.gem.wiki/Hendrina_power_station	L100000103442	G100000103814	ZAG000066697	1	2000		49	2015	2055	2095	200	200	200	200	200	200	200	200	200	200	200	200
coal	South Africa	Africa	Sub-Saharan Africa	Hendrina power station	Unit 9			200	mothballed	1976	2025	subcritical	bituminous					Eskom Holdings SOC [100%]	Eskom Holdings SOC [100.0%]	-26.032	29.6016	exact	Pullens Hope		Nkangala	Mpumalanga	https://www.gem.wiki/Hendrina_power_station	L100000103442	G100000103815	ZAG000066697	1	2000	2000	48	2016	2056	2096	0	0	0	0	0	0	0	0	0	0	0	0
coal	South Africa	Africa	Sub-Saharan Africa	Kendal power station	Unit 1			686	operating	1988	2038	subcritical	bituminous					Eskom Holdings SOC [100%]	Eskom Holdings SOC [100.0%]	-26.0903	28.9688	exact	Kendal		Nkangala	Mpumalanga	https://www.gem.wiki/Kendal_power_station	L100000103443	G100000105663	ZAG000066697	1	4116		36	2028	2068	2108	686	686	686	686	686	686	686	686	686	686	686	686
coal	South Africa	Africa	Sub-Saharan Africa	Kendal power station	Unit 2			686	operating	1989	2039	subcritical	bituminous					Eskom Holdings SOC [100%]	Eskom Holdings SOC [100.0%]	-26.0903	28.9688	exact	Kendal		Nkangala	Mpumalanga	https://www.gem.wiki/Kendal_power_station	L100000103443	G100000105664	ZAG000066697	1	4116		35	2029	2069	2109	686	686	686	686	686	686	686	686	686	686	686	686
coal	South Africa	Africa	Sub-Saharan Africa	Kendal power station	Unit 3			686	operating	1990	2040	subcritical	bituminous					Eskom Holdings SOC [100%]	Eskom Holdings SOC [100.0%]	-26.0903	28.9688	exact	Kendal		Nkangala	Mpumalanga	https://www.gem.wiki/Kendal_power_station	L100000103443	G100000105665	ZAG000066697	1	4116		34	2030	2070	2110	686	686	686	686	686	686	686	686	686	686	686	686
coal	South Africa	Africa	Sub-Saharan Africa	Kendal power station	Unit 4			686	operating	1991	2041	subcritical	bituminous					Eskom Holdings SOC [100%]	Eskom Holdings SOC [100.0%]	-26.0903	28.9688	exact	Kendal		Nkangala	Mpumalanga	https://www.gem.wiki/Kendal_power_station	L100000103443	G100000105666	ZAG000066697	1	4116		33	2031	2071	2111	686	686	686	686	686	686	686	686	686	686	686	686
coal	South Africa	Africa	Sub-Saharan Africa	Kendal power station	Unit 5			686	operating	1992	2042	subcritical	bituminous					Eskom Holdings SOC [100%]	Eskom Holdings SOC [100.0%]	-26.0903	28.9688	exact	Kendal		Nkangala	Mpumalanga	https://www.gem.wiki/Kendal_power_station	L100000103443	G100000105667	ZAG000066697	1	4116		32	2032	2072	2112	686	686	686	686	686	686	686	686	686	686	686	686
coal	South Africa	Africa	Sub-Saharan Africa	Kendal power station	Unit 6			686	operating	1993	2043	subcritical	bituminous					Eskom Holdings SOC [100%]	Eskom Holdings SOC [100.0%]	-26.0903	28.9688	exact	Kendal		Nkangala	Mpumalanga	https://www.gem.wiki/Kendal_power_station	L100000103443	G100000105668	ZAG000066697	1	4116	4116	31	2033	2073	2113	686	686	686	686	686	686	686	686	686	686	686	686
coal	South Africa	Africa	Sub-Saharan Africa	Komati power station	Unit 1			100	retired	1961	2022	subcritical	bituminous					Eskom Holdings SOC [100%]	Eskom Holdings SOC [100.0%]	-26.0908	29.4745	exact	Middleburg			Mpumalanga	https://www.gem.wiki/Komati_power_station	L100000103446	G100000105828	ZAG000066697	1	1000		63	2001	2041	2081	100	100	0	0	0	0	0	0	0	0	0	0
coal	South Africa	Africa	Sub-Saharan Africa	Komati power station	Unit 2			100	retired	1962	2022	subcritical	bituminous					Eskom Holdings SOC [100%]	Eskom Holdings SOC [100.0%]	-26.0908	29.4745	exact	Middleburg			Mpumalanga	https://www.gem.wiki/Komati_power_station	L100000103446	G100000105829	ZAG000066697	1	1000		62	2002	2042	2082	100	100	0	0	0	0	0	0	0	0	0	0
coal	South Africa	Africa	Sub-Saharan Africa	Komati power station	Unit 3			100	retired	1962	2022	subcritical	bituminous					Eskom Holdings SOC [100%]	Eskom Holdings SOC [100.0%]	-26.0908	29.4745	exact	Middleburg			Mpumalanga	https://www.gem.wiki/Komati_power_station	L100000103446	G100000105830	ZAG000066697	1	1000		62	2002	2042	2082	100	100	0	0	0	0	0	0	0	0	0	0
coal	South Africa	Africa	Sub-Saharan Africa	Komati power station	Unit 4			100	retired	1963	2022	subcritical	bituminous					Eskom Holdings SOC [100%]	Eskom Holdings SOC [100.0%]	-26.0908	29.4745	exact	Middleburg			Mpumalanga	https://www.gem.wiki/Komati_power_station	L100000103446	G100000105831	ZAG000066697	1	1000		61	2003	2043	2083	100	100	0	0	0	0	0	0	0	0	0	0
coal	South Africa	Africa	Sub-Saharan Africa	Komati power station	Unit 5			100	retired	1963	2022	subcritical	bituminous					Eskom Holdings SOC [100%]	Eskom Holdings SOC [100.0%]	-26.0908	29.4745	exact	Middleburg			Mpumalanga	https://www.gem.wiki/Komati_power_station	L100000103446	G100000105832	ZAG000066697	1	1000		61	2003	2043	2083	100	100	0	0	0	0	0	0	0	0	0	0
coal	South Africa	Africa	Sub-Saharan Africa	Komati power station	Unit 6			125	retired	1964	2022	subcritical	bituminous					Eskom Holdings SOC [100%]	Eskom Holdings SOC [100.0%]	-26.0908	29.4745	exact	Middleburg			Mpumalanga	https://www.gem.wiki/Komati_power_station	L100000103446	G100000105833	ZAG000066697	1	1000		60	2004	2044	2084	125	125	0	0	0	0	0	0	0	0	0	0
coal	South Africa	Africa	Sub-Saharan Africa	Komati power station	Unit 7			125	retired	1964	2022	subcritical	bituminous					Eskom Holdings SOC [100%]	Eskom Holdings SOC [100.0%]	-26.0908	29.4745	exact	Middleburg			Mpumalanga	https://www.gem.wiki/Komati_power_station	L100000103446	G100000105834	ZAG000066697	1	1000		60	2004	2044	2084	125	125	0	0	0	0	0	0	0	0	0	0
coal	South Africa	Africa	Sub-Saharan Africa	Komati power station	Unit 8			125	retired	1964	2022	subcritical	bituminous					Eskom Holdings SOC [100%]	Eskom Holdings SOC [100.0%]	-26.0908	29.4745	exact	Middleburg			Mpumalanga	https://www.gem.wiki/Komati_power_station	L100000103446	G100000105835	ZAG000066697	1	1000		60	2004	2044	2084	125	125	0	0	0	0	0	0	0	0	0	0
coal	South Africa	Africa	Sub-Saharan Africa	Komati power station	Unit 9			125	retired	1964	2022	subcritical	bituminous					Eskom Holdings SOC [100%]	Eskom Holdings SOC [100.0%]	-26.0908	29.4745	exact	Middleburg			Mpumalanga	https://www.gem.wiki/Komati_power_station	L100000103446	G100000105836	ZAG000066697	1	1000	1000	60	2004	2044	2084	125	125	0	0	0	0	0	0	0	0	0	0
coal	South Africa	Africa	Sub-Saharan Africa	Kriel power station	Unit 1			500	operating	1976	2026	subcritical	bituminous					Eskom Holdings SOC [100%]	Eskom Holdings SOC [100.0%]	-26.2539	29.1785	exact	Kriel		Nkangala	Mpumalanga	https://www.gem.wiki/Kriel_power_station	L100000103447	G100000105964	ZAG000066697	1	3000		48	2016	2056	2096	500	500	500	500	500	500	500	500	500	500	500	500
coal	South Africa	Africa	Sub-Saharan Africa	Kriel power station	Unit 2			500	operating	1976	2027	subcritical	bituminous					Eskom Holdings SOC [100%]	Eskom Holdings SOC [100.0%]	-26.2539	29.1785	exact	Kriel		Nkangala	Mpumalanga	https://www.gem.wiki/Kriel_power_station	L100000103447	G100000105965	ZAG000066697	1	3000		48	2016	2056	2096	500	500	500	500	500	500	500	500	500	500	500	500
coal	South Africa	Africa	Sub-Saharan Africa	Kriel power station	Unit 3			500	operating	1977	2028	subcritical	bituminous					Eskom Holdings SOC [100%]	Eskom Holdings SOC [100.0%]	-26.2539	29.1785	exact	Kriel		Nkangala	Mpumalanga	https://www.gem.wiki/Kriel_power_station	L100000103447	G100000105966	ZAG000066697	1	3000		47	2017	2057	2097	500	500	500	500	500	500	500	500	500	500	500	500
coal	South Africa	Africa	Sub-Saharan Africa	Kriel power station	Unit 4			500	operating	1978	2029	subcritical	bituminous					Eskom Holdings SOC [100%]	Eskom Holdings SOC [100.0%]	-26.2539	29.1785	exact	Kriel		Nkangala	Mpumalanga	https://www.gem.wiki/Kriel_power_station	L100000103447	G100000105967	ZAG000066697	1	3000		46	2018	2058	2098	500	500	500	500	500	500	500	500	500	500	500	500
coal	South Africa	Africa	Sub-Saharan Africa	Kriel power station	Unit 5			500	operating	1979	2029	subcritical	bituminous					Eskom Holdings SOC [100%]	Eskom Holdings SOC [100.0%]	-26.2539	29.1785	exact	Kriel		Nkangala	Mpumalanga	https://www.gem.wiki/Kriel_power_station	L100000103447	G100000105968	ZAG000066697	1	3000		45	2019	2059	2099	500	500	500	500	500	500	500	500	500	500	500	500
coal	South Africa	Africa	Sub-Saharan Africa	Kriel power station	Unit 6			500	operating	1979	2030	subcritical	bituminous					Eskom Holdings SOC [100%]	Eskom Holdings SOC [100.0%]	-26.2539	29.1785	exact	Kriel		Nkangala	Mpumalanga	https://www.gem.wiki/Kriel_power_station	L100000103447	G100000105969	ZAG000066697	1	3000	3000	45	2019	2059	2099	500	500	500	500	500	500	500	500	500	500	500	500
coal	South Africa	Africa	Sub-Saharan Africa	Kusile power station	Unit 1			800	operating	2018	2069	supercritical	bituminous					Eskom Holdings SOC [100%]	Eskom Holdings SOC [100.0%]	-25.9201	28.9249	exact	Witbank			Mpumalanga	https://www.gem.wiki/Kusile_power_station	L100000103448	G100000106039	ZAG000066697	1	4800		6	2058	2098	2138	800	800	800	800	800	800	800	800	800	800	800	800
coal	South Africa	Africa	Sub-Saharan Africa	Kusile power station	Unit 2			800	operating	2020	2070	supercritical	bituminous					Eskom Holdings SOC [100%]	Eskom Holdings SOC [100.0%]	-25.9201	28.9249	exact	Witbank			Mpumalanga	https://www.gem.wiki/Kusile_power_station	L100000103448	G100000106040	ZAG000066697	1	4800		4	2060	2100	2140	800	800	800	800	800	800	800	800	800	800	800	800
coal	South Africa	Africa	Sub-Saharan Africa	Kusile power station	Unit 3			800	operating	2021	2071	supercritical	bituminous					Eskom Holdings SOC [100%]	Eskom Holdings SOC [100.0%]	-25.9201	28.9249	exact	Witbank			Mpumalanga	https://www.gem.wiki/Kusile_power_station	L100000103448	G100000106041	ZAG000066697	1	4800		3	2061	2101	2141	0	800	800	800	800	800	800	800	800	800	800	800
coal	South Africa	Africa	Sub-Saharan Africa	Kusile power station	Unit 4			800	operating	2022		supercritical	bituminous					Eskom Holdings SOC [100%]	Eskom Holdings SOC [100.0%]	-25.9201	28.9249	exact	Witbank			Mpumalanga	https://www.gem.wiki/Kusile_power_station	L100000103448	G100000106042	ZAG000066697	1	4800		2	2062	2102	2142	0	0	800	800	800	800	800	800	800	800	800	800
coal	South Africa	Africa	Sub-Saharan Africa	Kusile power station	Unit 5			800	construction	2024		supercritical	bituminous					Eskom Holdings SOC [100%]	Eskom Holdings SOC [100.0%]	-25.9201	28.9249	exact	Witbank			Mpumalanga	https://www.gem.wiki/Kusile_power_station	L100000103448	G100000106043	ZAG000066697	1	4800		0	2064	2104	2144	0	0	0	0	800	800	800	800	800	800	800	800
coal	South Africa	Africa	Sub-Saharan Africa	Kusile power station	Unit 6			800	construction	2025		supercritical	bituminous					Eskom Holdings SOC [100%]	Eskom Holdings SOC [100.0%]	-25.9201	28.9249	exact	Witbank			Mpumalanga	https://www.gem.wiki/Kusile_power_station	L100000103448	G100000106044	ZAG000066697	1	4800	4800	-1	2065	2105	2145	0	0	0	0	0	800	800	800	800	800	800	800
coal	South Africa	Africa	Sub-Saharan Africa	Lethabo power station	Unit 1			618	operating	1985	2035	subcritical	bituminous					Eskom Holdings SOC [100%]	Eskom Holdings SOC [100.0%]	-26.742	27.9769	exact	Viljoensdrif		Fezile Dabi	Free State	https://www.gem.wiki/Lethabo_power_station	L100000103423	G100000106240	ZAG000066697	1	3708		39	2025	2065	2105	618	618	618	618	618	618	618	618	618	618	618	618
coal	South Africa	Africa	Sub-Saharan Africa	Lethabo power station	Unit 2			618	operating	1986	2036	subcritical	bituminous					Eskom Holdings SOC [100%]	Eskom Holdings SOC [100.0%]	-26.742	27.9769	exact	Viljoensdrif		Fezile Dabi	Free State	https://www.gem.wiki/Lethabo_power_station	L100000103423	G100000106241	ZAG000066697	1	3708		38	2026	2066	2106	618	618	618	618	618	618	618	618	618	618	618	618
coal	South Africa	Africa	Sub-Saharan Africa	Lethabo power station	Unit 3			618	operating	1987	2037	subcritical	bituminous					Eskom Holdings SOC [100%]	Eskom Holdings SOC [100.0%]	-26.742	27.9769	exact	Viljoensdrif		Fezile Dabi	Free State	https://www.gem.wiki/Lethabo_power_station	L100000103423	G100000106242	ZAG000066697	1	3708		37	2027	2067	2107	618	618	618	618	618	618	618	618	618	618	618	618
coal	South Africa	Africa	Sub-Saharan Africa	Lethabo power station	Unit 4			618	operating	1987	2037	subcritical	bituminous					Eskom Holdings SOC [100%]	Eskom Holdings SOC [100.0%]	-26.742	27.9769	exact	Viljoensdrif		Fezile Dabi	Free State	https://www.gem.wiki/Lethabo_power_station	L100000103423	G100000106243	ZAG000066697	1	3708		37	2027	2067	2107	618	618	618	618	618	618	618	618	618	618	618	618
coal	South Africa	Africa	Sub-Saharan Africa	Lethabo power station	Unit 5			618	operating	1989	2039	subcritical	bituminous					Eskom Holdings SOC [100%]	Eskom Holdings SOC [100.0%]	-26.742	27.9769	exact	Viljoensdrif		Fezile Dabi	Free State	https://www.gem.wiki/Lethabo_power_station	L100000103423	G100000106244	ZAG000066697	1	3708		35	2029	2069	2109	618	618	618	618	618	618	618	618	618	618	618	618
coal	South Africa	Africa	Sub-Saharan Africa	Lethabo power station	Unit 6			618	operating	1990	2040	subcritical	bituminous					Eskom Holdings SOC [100%]	Eskom Holdings SOC [100.0%]	-26.742	27.9769	exact	Viljoensdrif		Fezile Dabi	Free State	https://www.gem.wiki/Lethabo_power_station	L100000103423	G100000106245	ZAG000066697	1	3708	3708	34	2030	2070	2110	618	618	618	618	618	618	618	618	618	618	618	618
coal	South Africa	Africa	Sub-Saharan Africa	Majuba power station	Unit 1			665	operating	1996	2046	subcritical	bituminous					Eskom Holdings SOC [100%]	Eskom Holdings SOC [100.0%]	-27.1006	29.771	exact	Amersfoort		Gert Sibande	Mpumalanga	https://www.gem.wiki/Majuba_power_station	L100000103449	G100000106600	ZAG000066697	1	4143		28	2036	2076	2116	665	665	665	665	665	665	665	665	665	665	665	665
coal	South Africa	Africa	Sub-Saharan Africa	Majuba power station	Unit 2			665	operating	1997	2047	subcritical	bituminous					Eskom Holdings SOC [100%]	Eskom Holdings SOC [100.0%]	-27.1006	29.771	exact	Amersfoort		Gert Sibande	Mpumalanga	https://www.gem.wiki/Majuba_power_station	L100000103449	G100000106601	ZAG000066697	1	4143		27	2037	2077	2117	665	665	665	665	665	665	665	665	665	665	665	665
coal	South Africa	Africa	Sub-Saharan Africa	Majuba power station	Unit 3			665	operating	1998	2048	subcritical	bituminous					Eskom Holdings SOC [100%]	Eskom Holdings SOC [100.0%]	-27.1006	29.771	exact	Amersfoort		Gert Sibande	Mpumalanga	https://www.gem.wiki/Majuba_power_station	L100000103449	G100000106602	ZAG000066697	1	4143		26	2038	2078	2118	665	665	665	665	665	665	665	665	665	665	665	665
coal	South Africa	Africa	Sub-Saharan Africa	Majuba power station	Unit 4			716	operating	1999	2049	subcritical	bituminous					Eskom Holdings SOC [100%]	Eskom Holdings SOC [100.0%]	-27.1006	29.771	exact	Amersfoort		Gert Sibande	Mpumalanga	https://www.gem.wiki/Majuba_power_station	L100000103449	G100000106603	ZAG000066697	1	4143		25	2039	2079	2119	716	716	716	716	716	716	716	716	716	716	716	716
coal	South Africa	Africa	Sub-Saharan Africa	Majuba power station	Unit 5			716	operating	2000	2050	subcritical	bituminous					Eskom Holdings SOC [100%]	Eskom Holdings SOC [100.0%]	-27.1006	29.771	exact	Amersfoort		Gert Sibande	Mpumalanga	https://www.gem.wiki/Majuba_power_station	L100000103449	G100000106604	ZAG000066697	1	4143		24	2040	2080	2120	716	716	716	716	716	716	716	716	716	716	716	716
coal	South Africa	Africa	Sub-Saharan Africa	Majuba power station	Unit 6			716	operating	2001	2051	subcritical	bituminous					Eskom Holdings SOC [100%]	Eskom Holdings SOC [100.0%]	-27.1006	29.771	exact	Amersfoort		Gert Sibande	Mpumalanga	https://www.gem.wiki/Majuba_power_station	L100000103449	G100000106605	ZAG000066697	1	4143	4143	23	2041	2081	2121	716	716	716	716	716	716	716	716	716	716	716	716
coal	South Africa	Africa	Sub-Saharan Africa	Matimba power station	Unit 1			665	operating	1987	2037	subcritical	bituminous					Eskom Holdings SOC [100%]	Eskom Holdings SOC [100.0%]	-23.6688	27.6108	exact	Lephalale		Waterberg	Limpopo	https://www.gem.wiki/Matimba_power_station	L100000103431	G100000106720	ZAG000066697	1	3990		37	2027	2067	2107	665	665	665	665	665	665	665	665	665	665	665	665
coal	South Africa	Africa	Sub-Saharan Africa	Matimba power station	Unit 2			665	operating	1987	2037	subcritical	bituminous					Eskom Holdings SOC [100%]	Eskom Holdings SOC [100.0%]	-23.6688	27.6108	exact	Lephalale		Waterberg	Limpopo	https://www.gem.wiki/Matimba_power_station	L100000103431	G100000106721	ZAG000066697	1	3990		37	2027	2067	2107	665	665	665	665	665	665	665	665	665	665	665	665
coal	South Africa	Africa	Sub-Saharan Africa	Matimba power station	Unit 3			665	operating	1988	2038	subcritical	bituminous					Eskom Holdings SOC [100%]	Eskom Holdings SOC [100.0%]	-23.6688	27.6108	exact	Lephalale		Waterberg	Limpopo	https://www.gem.wiki/Matimba_power_station	L100000103431	G100000106722	ZAG000066697	1	3990		36	2028	2068	2108	665	665	665	665	665	665	665	665	665	665	665	665
coal	South Africa	Africa	Sub-Saharan Africa	Matimba power station	Unit 4			665	operating	1989	2039	subcritical	bituminous					Eskom Holdings SOC [100%]	Eskom Holdings SOC [100.0%]	-23.6688	27.6108	exact	Lephalale		Waterberg	Limpopo	https://www.gem.wiki/Matimba_power_station	L100000103431	G100000106723	ZAG000066697	1	3990		35	2029	2069	2109	665	665	665	665	665	665	665	665	665	665	665	665
coal	South Africa	Africa	Sub-Saharan Africa	Matimba power station	Unit 5			665	operating	1990	2040	subcritical	bituminous					Eskom Holdings SOC [100%]	Eskom Holdings SOC [100.0%]	-23.6688	27.6108	exact	Lephalale		Waterberg	Limpopo	https://www.gem.wiki/Matimba_power_station	L100000103431	G100000106724	ZAG000066697	1	3990		34	2030	2070	2110	665	665	665	665	665	665	665	665	665	665	665	665
coal	South Africa	Africa	Sub-Saharan Africa	Matimba power station	Unit 6			665	operating	1991	2041	subcritical	bituminous					Eskom Holdings SOC [100%]	Eskom Holdings SOC [100.0%]	-23.6688	27.6108	exact	Lephalale		Waterberg	Limpopo	https://www.gem.wiki/Matimba_power_station	L100000103431	G100000106725	ZAG000066697	1	3990	3990	33	2031	2071	2111	665	665	665	665	665	665	665	665	665	665	665	665
coal	South Africa	Africa	Sub-Saharan Africa	Matla power station	Unit 1			600	operating	1979	2030	subcritical	bituminous					Eskom Holdings SOC [100%]	Eskom Holdings SOC [100.0%]	-26.2813	29.1415	exact	Kriel		Nkangala	Mpumalanga	https://www.gem.wiki/Matla_power_station	L100000103450	G100000106726	ZAG000066697	1	3600		45	2019	2059	2099	600	600	600	600	600	600	600	600	600	600	600	600
coal	South Africa	Africa	Sub-Saharan Africa	Matla power station	Unit 2			600	operating	1980	2031	subcritical	bituminous					Eskom Holdings SOC [100%]	Eskom Holdings SOC [100.0%]	-26.2813	29.1415	exact	Kriel		Nkangala	Mpumalanga	https://www.gem.wiki/Matla_power_station	L100000103450	G100000106727	ZAG000066697	1	3600		44	2020	2060	2100	600	600	600	600	600	600	600	600	600	600	600	600
coal	South Africa	Africa	Sub-Saharan Africa	Matla power station	Unit 3			600	operating	1980	2031	subcritical	bituminous					Eskom Holdings SOC [100%]	Eskom Holdings SOC [100.0%]	-26.2813	29.1415	exact	Kriel		Nkangala	Mpumalanga	https://www.gem.wiki/Matla_power_station	L100000103450	G100000106728	ZAG000066697	1	3600		44	2020	2060	2100	600	600	600	600	600	600	600	600	600	600	600	600
coal	South Africa	Africa	Sub-Saharan Africa	Matla power station	Unit 4			600	operating	1981	2032	subcritical	bituminous					Eskom Holdings SOC [100%]	Eskom Holdings SOC [100.0%]	-26.2813	29.1415	exact	Kriel		Nkangala	Mpumalanga	https://www.gem.wiki/Matla_power_station	L100000103450	G100000106729	ZAG000066697	1	3600		43	2021	2061	2101	600	600	600	600	600	600	600	600	600	600	600	600
coal	South Africa	Africa	Sub-Saharan Africa	Matla power station	Unit 5			600	operating	1982	2033	subcritical	bituminous					Eskom Holdings SOC [100%]	Eskom Holdings SOC [100.0%]	-26.2813	29.1415	exact	Kriel		Nkangala	Mpumalanga	https://www.gem.wiki/Matla_power_station	L100000103450	G100000106730	ZAG000066697	1	3600		42	2022	2062	2102	600	600	600	600	600	600	600	600	600	600	600	600
coal	South Africa	Africa	Sub-Saharan Africa	Matla power station	Unit 6			600	operating	1983	2034	subcritical	bituminous					Eskom Holdings SOC [100%]	Eskom Holdings SOC [100.0%]	-26.2813	29.1415	exact	Kriel		Nkangala	Mpumalanga	https://www.gem.wiki/Matla_power_station	L100000103450	G100000106731	ZAG000066697	1	3600	3600	41	2023	2063	2103	600	600	600	600	600	600	600	600	600	600	600	600
coal	South Africa	Africa	Sub-Saharan Africa	Medupi power station	Unit 1			794.8	operating	2021	2071	supercritical	bituminous					Eskom Holdings SOC [100%]	Eskom Holdings SOC [100.0%]	-23.705	27.5638	exact	Lephalale			Limpopo	https://www.gem.wiki/Medupi_power_station	L100000103432	G100000106780	ZAG000066697	1	4768.8		3	2061	2101	2141	0	794.8	794.8	794.8	794.8	794.8	794.8	794.8	794.8	794.8	794.8	794.8
coal	South Africa	Africa	Sub-Saharan Africa	Medupi power station	Unit 2			794.8	operating	2019	2069	supercritical	bituminous					Eskom Holdings SOC [100%]	Eskom Holdings SOC [100.0%]	-23.705	27.5638	exact	Lephalale			Limpopo	https://www.gem.wiki/Medupi_power_station	L100000103432	G100000106781	ZAG000066697	1	4768.8		5	2059	2099	2139	794.8	794.8	794.8	794.8	794.8	794.8	794.8	794.8	794.8	794.8	794.8	794.8
coal	South Africa	Africa	Sub-Saharan Africa	Medupi power station	Unit 3			794.8	operating	2019	2068	supercritical	bituminous					Eskom Holdings SOC [100%]	Eskom Holdings SOC [100.0%]	-23.705	27.5638	exact	Lephalale			Limpopo	https://www.gem.wiki/Medupi_power_station	L100000103432	G100000106782	ZAG000066697	1	4768.8		5	2059	2099	2139	794.8	794.8	794.8	794.8	794.8	794.8	794.8	794.8	794.8	794.8	794.8	794.8
coal	South Africa	Africa	Sub-Saharan Africa	Medupi power station	Unit 4			794.8	operating	2017	2067	supercritical	bituminous					Eskom Holdings SOC [100%]	Eskom Holdings SOC [100.0%]	-23.705	27.5638	exact	Lephalale			Limpopo	https://www.gem.wiki/Medupi_power_station	L100000103432	G100000106783	ZAG000066697	1	4768.8		7	2057	2097	2137	794.8	794.8	794.8	794.8	794.8	794.8	794.8	794.8	794.8	794.8	794.8	794.8
coal	South Africa	Africa	Sub-Saharan Africa	Medupi power station	Unit 5			794.8	operating	2017	2067	supercritical	bituminous					Eskom Holdings SOC [100%]	Eskom Holdings SOC [100.0%]	-23.705	27.5638	exact	Lephalale			Limpopo	https://www.gem.wiki/Medupi_power_station	L100000103432	G100000106784	ZAG000066697	1	4768.8		7	2057	2097	2137	794.8	794.8	794.8	794.8	794.8	794.8	794.8	794.8	794.8	794.8	794.8	794.8
coal	South Africa	Africa	Sub-Saharan Africa	Medupi power station	Unit 6			794.8	operating	2015	2065	supercritical	bituminous					Eskom Holdings SOC [100%]	Eskom Holdings SOC [100.0%]	-23.705	27.5638	exact	Lephalale			Limpopo	https://www.gem.wiki/Medupi_power_station	L100000103432	G100000106785	ZAG000066697	1	4768.8	4768.8	9	2055	2095	2135	794.8	794.8	794.8	794.8	794.8	794.8	794.8	794.8	794.8	794.8	794.8	794.8
coal	South Africa	Africa	Sub-Saharan Africa	Tutuka power station	Unit 1			609	operating	1985	2035	subcritical	bituminous					Eskom Holdings SOC [100%]	Eskom Holdings SOC [100.0%]	-26.7772	29.3524	exact	Standerton		Gert Sibande	Mpumalanga	https://www.gem.wiki/Tutuka_power_station	L100000103452	G100000110396	ZAG000066697	1	3654		39	2025	2065	2105	609	609	609	609	609	609	609	609	609	609	609	609
coal	South Africa	Africa	Sub-Saharan Africa	Tutuka power station	Unit 2			609	operating	1985	2035	subcritical	bituminous					Eskom Holdings SOC [100%]	Eskom Holdings SOC [100.0%]	-26.7772	29.3524	exact	Standerton		Gert Sibande	Mpumalanga	https://www.gem.wiki/Tutuka_power_station	L100000103452	G100000110397	ZAG000066697	1	3654		39	2025	2065	2105	609	609	609	609	609	609	609	609	609	609	609	609
coal	South Africa	Africa	Sub-Saharan Africa	Tutuka power station	Unit 3			609	operating	1986	2036	subcritical	bituminous					Eskom Holdings SOC [100%]	Eskom Holdings SOC [100.0%]	-26.7772	29.3524	exact	Standerton		Gert Sibande	Mpumalanga	https://www.gem.wiki/Tutuka_power_station	L100000103452	G100000110398	ZAG000066697	1	3654		38	2026	2066	2106	609	609	609	609	609	609	609	609	609	609	609	609
coal	South Africa	Africa	Sub-Saharan Africa	Tutuka power station	Unit 4			609	operating	1987	2037	subcritical	bituminous					Eskom Holdings SOC [100%]	Eskom Holdings SOC [100.0%]	-26.7772	29.3524	exact	Standerton		Gert Sibande	Mpumalanga	https://www.gem.wiki/Tutuka_power_station	L100000103452	G100000110399	ZAG000066697	1	3654		37	2027	2067	2107	609	609	609	609	609	609	609	609	609	609	609	609
coal	South Africa	Africa	Sub-Saharan Africa	Tutuka power station	Unit 5			609	operating	1988	2038	subcritical	bituminous					Eskom Holdings SOC [100%]	Eskom Holdings SOC [100.0%]	-26.7772	29.3524	exact	Standerton		Gert Sibande	Mpumalanga	https://www.gem.wiki/Tutuka_power_station	L100000103452	G100000110400	ZAG000066697	1	3654		36	2028	2068	2108	609	609	609	609	609	609	609	609	609	609	609	609
coal	South Africa	Africa	Sub-Saharan Africa	Tutuka power station	Unit 6			609	operating	1990	2040	subcritical	bituminous					Eskom Holdings SOC [100%]	Eskom Holdings SOC [100.0%]	-26.7772	29.3524	exact	Standerton		Gert Sibande	Mpumalanga	https://www.gem.wiki/Tutuka_power_station	L100000103452	G100000110401	ZAG000066697	1	3654	3654	34	2030	2070	2110	609	609	609	609	609	609	609	609	609	609	609	609
oil/gas	South Africa	Africa	Sub-Saharan Africa	Acacia power station	1			57	operating	1976		GT	KER					Eskom Holdings SOC Ltd [100.0%]	Eskom Holdings SOC Ltd [100.0%]	-33.8831	18.5358	exact	Cape Town			Western Cape	https://www.gem.wiki/Acacia_power_station	L100000408170	G100000411354	ZAG000066697	1	171		48	2016	2056	2096	57	57	57	57	57	57	57	57	57	57	57	57
oil/gas	South Africa	Africa	Sub-Saharan Africa	Acacia power station	2			57	operating	1976		GT	KER					Eskom Holdings SOC Ltd [100.0%]	Eskom Holdings SOC Ltd [100.0%]	-33.8831	18.5358	exact	Cape Town			Western Cape	https://www.gem.wiki/Acacia_power_station	L100000408170	G100000411353	ZAG000066697	1	171		48	2016	2056	2096	57	57	57	57	57	57	57	57	57	57	57	57
oil/gas	South Africa	Africa	Sub-Saharan Africa	Acacia power station	3			57	operating	1976		GT	KER					Eskom Holdings SOC Ltd [100.0%]	Eskom Holdings SOC Ltd [100.0%]	-33.8831	18.5358	exact	Cape Town			Western Cape	https://www.gem.wiki/Acacia_power_station	L100000408170	G100000411352	ZAG000066697	1	171	171	48	2016	2056	2096	57	57	57	57	57	57	57	57	57	57	57	57
oil/gas	South Africa	Africa	Sub-Saharan Africa	Ankerlig power station	1-1			149.2	operating	2007		GT	D					Eskom Holdings SOC Ltd [100.0%]	Eskom Holdings SOC Ltd [100.0%]	-33.5895	18.4615	exact	Atlantis			Western Cape	https://www.gem.wiki/Ankerlig_power_station	L100000407107	G100000408556	ZAG000066697	1	1338.3		17	2047	2087	2127	149.2	149.2	149.2	149.2	149.2	149.2	149.2	149.2	149.2	149.2	149.2	149.2
oil/gas	South Africa	Africa	Sub-Saharan Africa	Ankerlig power station	1-2			149.2	operating	2007		GT	D					Eskom Holdings SOC Ltd [100.0%]	Eskom Holdings SOC Ltd [100.0%]	-33.5895	18.4615	exact	Atlantis			Western Cape	https://www.gem.wiki/Ankerlig_power_station	L100000407107	G100000414357	ZAG000066697	1	1338.3		17	2047	2087	2127	149.2	149.2	149.2	149.2	149.2	149.2	149.2	149.2	149.2	149.2	149.2	149.2
oil/gas	South Africa	Africa	Sub-Saharan Africa	Ankerlig power station	1-3			149.2	operating	2007		GT	D					Eskom Holdings SOC Ltd [100.0%]	Eskom Holdings SOC Ltd [100.0%]	-33.5895	18.4615	exact	Atlantis			Western Cape	https://www.gem.wiki/Ankerlig_power_station	L100000407107	G100000414356	ZAG000066697	1	1338.3		17	2047	2087	2127	149.2	149.2	149.2	149.2	149.2	149.2	149.2	149.2	149.2	149.2	149.2	149.2
oil/gas	South Africa	Africa	Sub-Saharan Africa	Ankerlig power station	1-4			149.2	operating	2007		GT	D					Eskom Holdings SOC Ltd [100.0%]	Eskom Holdings SOC Ltd [100.0%]	-33.5895	18.4615	exact	Atlantis			Western Cape	https://www.gem.wiki/Ankerlig_power_station	L100000407107	G100000414355	ZAG000066697	1	1338.3		17	2047	2087	2127	149.2	149.2	149.2	149.2	149.2	149.2	149.2	149.2	149.2	149.2	149.2	149.2
oil/gas	South Africa	Africa	Sub-Saharan Africa	Ankerlig power station	2-1			148.3	operating	2009		GT	D					Eskom Holdings SOC Ltd [100.0%]	Eskom Holdings SOC Ltd [100.0%]	-33.5895	18.4615	exact	Atlantis			Western Cape	https://www.gem.wiki/Ankerlig_power_station	L100000407107	G100000413925	ZAG000066697	1	1338.3		15	2049	2089	2129	148.3	148.3	148.3	148.3	148.3	148.3	148.3	148.3	148.3	148.3	148.3	148.3
oil/gas	South Africa	Africa	Sub-Saharan Africa	Ankerlig power station	2-2			148.3	operating	2009		GT	D					Eskom Holdings SOC Ltd [100.0%]	Eskom Holdings SOC Ltd [100.0%]	-33.5895	18.4615	exact	Atlantis			Western Cape	https://www.gem.wiki/Ankerlig_power_station	L100000407107	G100000414354	ZAG000066697	1	1338.3		15	2049	2089	2129	148.3	148.3	148.3	148.3	148.3	148.3	148.3	148.3	148.3	148.3	148.3	148.3
oil/gas	South Africa	Africa	Sub-Saharan Africa	Ankerlig power station	2-3			148.3	operating	2009		GT	D					Eskom Holdings SOC Ltd [100.0%]	Eskom Holdings SOC Ltd [100.0%]	-33.5895	18.4615	exact	Atlantis			Western Cape	https://www.gem.wiki/Ankerlig_power_station	L100000407107	G100000414353	ZAG000066697	1	1338.3		15	2049	2089	2129	148.3	148.3	148.3	148.3	148.3	148.3	148.3	148.3	148.3	148.3	148.3	148.3
oil/gas	South Africa	Africa	Sub-Saharan Africa	Ankerlig power station	2-4			148.3	operating	2009		GT	D					Eskom Holdings SOC Ltd [100.0%]	Eskom Holdings SOC Ltd [100.0%]	-33.5895	18.4615	exact	Atlantis			Western Cape	https://www.gem.wiki/Ankerlig_power_station	L100000407107	G100000414352	ZAG000066697	1	1338.3		15	2049	2089	2129	148.3	148.3	148.3	148.3	148.3	148.3	148.3	148.3	148.3	148.3	148.3	148.3
oil/gas	South Africa	Africa	Sub-Saharan Africa	Ankerlig power station	2-5			148.3	operating	2009		GT	D					Eskom Holdings SOC Ltd [100.0%]	Eskom Holdings SOC Ltd [100.0%]	-33.5895	18.4615	exact	Atlantis			Western Cape	https://www.gem.wiki/Ankerlig_power_station	L100000407107	G100000414351	ZAG000066697	1	1338.3	1338.3	15	2049	2089	2129	148.3	148.3	148.3	148.3	148.3	148.3	148.3	148.3	148.3	148.3	148.3	148.3
oil/gas	South Africa	Africa	Sub-Saharan Africa	Gourikwa power station	1			148	operating	2007		GT	D					Eskom Holdings SOC Ltd [100.0%]	Eskom Holdings SOC Ltd [100.0%]	-34.1668	21.9607	exact	Mossel Bay			Western Cape	https://www.gem.wiki/Gourikwa_power_station	L100000407108	G100000408557	ZAG000066697	1	740		17	2047	2087	2127	148	148	148	148	148	148	148	148	148	148	148	148
oil/gas	South Africa	Africa	Sub-Saharan Africa	Gourikwa power station	2			148	operating	2007		GT	D					Eskom Holdings SOC Ltd [100.0%]	Eskom Holdings SOC Ltd [100.0%]	-34.1668	21.9607	exact	Mossel Bay			Western Cape	https://www.gem.wiki/Gourikwa_power_station	L100000407108	G100000410887	ZAG000066697	1	740		17	2047	2087	2127	148	148	148	148	148	148	148	148	148	148	148	148
oil/gas	South Africa	Africa	Sub-Saharan Africa	Gourikwa power station	3			148	operating	2007		GT	D					Eskom Holdings SOC Ltd [100.0%]	Eskom Holdings SOC Ltd [100.0%]	-34.1668	21.9607	exact	Mossel Bay			Western Cape	https://www.gem.wiki/Gourikwa_power_station	L100000407108	G100000410886	ZAG000066697	1	740		17	2047	2087	2127	148	148	148	148	148	148	148	148	148	148	148	148
oil/gas	South Africa	Africa	Sub-Saharan Africa	Gourikwa power station	4			148	operating	2009		GT	D					Eskom Holdings SOC Ltd [100.0%]	Eskom Holdings SOC Ltd [100.0%]	-34.1668	21.9607	exact	Mossel Bay			Western Cape	https://www.gem.wiki/Gourikwa_power_station	L100000407108	G100000410885	ZAG000066697	1	740		15	2049	2089	2129	148	148	148	148	148	148	148	148	148	148	148	148
oil/gas	South Africa	Africa	Sub-Saharan Africa	Gourikwa power station	5			148	operating	2009		GT	D					Eskom Holdings SOC Ltd [100.0%]	Eskom Holdings SOC Ltd [100.0%]	-34.1668	21.9607	exact	Mossel Bay			Western Cape	https://www.gem.wiki/Gourikwa_power_station	L100000407108	G100000410884	ZAG000066697	1	740	740	15	2049	2089	2129	148	148	148	148	148	148	148	148	148	148	148	148
oil/gas	South Africa	Africa	Sub-Saharan Africa	Port Rex power station	4			57	operating	1976		GT	KER					Eskom Holdings SOC Ltd [100.0%]	Eskom Holdings SOC Ltd [100.0%]	-33.028	27.8818	exact	East London				https://www.gem.wiki/Port_Rex_power_station	L100000408172	G100000411351	ZAG000066697	1	171		48	2016	2056	2096	57	57	57	57	57	57	57	57	57	57	57	57
oil/gas	South Africa	Africa	Sub-Saharan Africa	Port Rex power station	5			57	operating	1976		GT	KER					Eskom Holdings SOC Ltd [100.0%]	Eskom Holdings SOC Ltd [100.0%]	-33.028	27.8818	exact	East London				https://www.gem.wiki/Port_Rex_power_station	L100000408172	G100000411350	ZAG000066697	1	171		48	2016	2056	2096	57	57	57	57	57	57	57	57	57	57	57	57
oil/gas	South Africa	Africa	Sub-Saharan Africa	Port Rex power station	6			57	operating	1976		GT	KER					Eskom Holdings SOC Ltd [100.0%]	Eskom Holdings SOC Ltd [100.0%]	-33.028	27.8818	exact	East London				https://www.gem.wiki/Port_Rex_power_station	L100000408172	G100000411349	ZAG000066697	1	171	171	48	2016	2056	2096	57	57	57	57	57	57	57	57	57	57	57	57
oil/gas	South Africa	Africa	Sub-Saharan Africa	Richards Bay (Eskom) power station	1			3000	pre-construction			CC	LNG					Eskom Holdings SOC Ltd [100.0%]	Eskom Holdings SOC Ltd [100.0%]	-28.771	31.9765	exact	Richards Bay			KwaZulu-Natal	https://www.gem.wiki/Richards_Bay_(Eskom)_power_station	L100000407360	G100000409408	ZAG000066697	1	3000	3000	-99	40	80	120	0	0	0	0	0	0	0	0	0	3000	3000	3000
wind	South Africa	Africa	Sub-Saharan Africa	Komati wind farm			Komati Just Energy Transition Project	70	pre-construction			onshore						Eskom		-26.0905	29.4718	approximate					https://gem.wiki/Komati_wind_farm	L922011	G927425	ZAG000066697	1	70	70	-99	40	80	120	0	0	0	0	0	0	0	0	0	0	0	0
wind	South Africa	Africa	Sub-Saharan Africa	Sere wind farm	1			100	operating	2015		onshore						Eskom		-31.5296	18.0943	exact	Matzikama Local Municipality	West Coast District Municipality		Western Cape	https://gem.wiki/Sere_wind_farm	L900027	G900029	ZAG000066697	1	100	100	9	2055	2095	2135	100	100	100	100	100	100	100	100	100	100	100	100
nuclear	South Africa	Africa	Sub-Saharan Africa	Koeberg nuclear power plant	1			970	operating	1984		pressurized water reactor						Eskom		-33.6746	18.4321	exact		City of Cape Town		Western Cape	https://gem.wiki/Koeberg_nuclear_power_plant	L500139	G500317	ZAG000066697	1	1940		40	2024	2064	2104	970	970	970	970	970	970	970	970	970	970	970	970
nuclear	South Africa	Africa	Sub-Saharan Africa	Koeberg nuclear power plant	2			970	operating	1985		pressurized water reactor						Eskom		-33.6746	18.4321	exact		City of Cape Town		Western Cape	https://gem.wiki/Koeberg_nuclear_power_plant	L500139	G500318	ZAG000066697	1	1940	1940	39	2025	2065	2105	970	970	970	970	970	970	970	970	970	970	970	970
hydropower	South Africa	Africa	Sub-Saharan Africa	Drakensberg hydroelectric plant				1000	operating	1982		pumped storage				TRUE	FALSE	Eskom		-28.566	29.0834	exact	Okhahlamba Local Municipality	Uthukela District Municipality		KwaZulu-Natal	https://gem.wiki/Drakensberg_hydroelectric_plant	L603315	G603350	ZAG000066697	1	1000	1000	42	2022	2062	2102	1000	1000	1000	1000	1000	1000	1000	1000	1000	1000	1000	1000
hydropower	South Africa	Africa	Sub-Saharan Africa	Ingula hydroelectric plant				1332	operating	2016		pumped storage				TRUE	FALSE	Eskom		-28.2809	29.588	exact	Emnambithi/Ladysmith Local Municipality	Uthukela District Municipality		KwaZulu-Natal	https://gem.wiki/Ingula_hydroelectric_plant	L603317	G603352	ZAG000066697	1	1332	1332	8	2056	2096	2136	1332	1332	1332	1332	1332	1332	1332	1332	1332	1332	1332	1332
hydropower	South Africa	Africa	Sub-Saharan Africa	Palmiet hydroelectric plant				400	operating	1988		pumped storage				TRUE	FALSE	Eskom		-34.1985	18.9746	exact	Theewaterskloof Local Municipality	Overberg District Municipality		Western Cape	https://gem.wiki/Palmiet_hydroelectric_plant	L603318	G603353	ZAG000066697	1	400	400	36	2028	2068	2108	400	400	400	400	400	400	400	400	400	400	400	400
hydropower	South Africa	Africa	Sub-Saharan Africa	Tubatse hydroelectric plant				1500	announced			pumped storage				TRUE	FALSE	Eskom		-24.8058	30.1118	exact	Greater Tubatse Local Municipality	Sekhukhune District Municipality		Limpopo	https://gem.wiki/Tubatse_hydroelectric_plant	L603320	G604895	ZAG000066697	1	1500	1500	-99	40	80	120	0	0	0	0	0	0	0	0	0	1500	1500	1500
																																					TOTAL Capacity	48929.3	50524.1	50324.1	50324.1	51124.1	51924.1	51924.1	51924.1	51924.1	56424.1	56424.1	56424.1
																																					Coal	41737	43331.8	43131.8	43131.8	43931.8	44731.8	44731.8	44731.8	44731.8	44731.8	44731.8	44731.8
																																					Oil&Gas	2420.3	2420.3	2420.3	2420.3	2420.3	2420.3	2420.3	2420.3	2420.3	5420.3	5420.3	5420.3
																																					Fossil fuel	44157.3	45752.1	45552.1	45552.1	46352.1	47152.1	47152.1	47152.1	47152.1	50152.1	50152.1	50152.1
																																					Renewables	2832	2832	2832	2832	2832	2832	2832	2832	2832	4332	4332	4332
																																					Oil	0	0	0	0	0	0	0	0	0	0	0	0
																																					Gas	0	0	0	0	0	0	0	0	0	3000	3000	3000
																																					Nuclear	1940	1940	1940	1940	1940	1940	1940	1940	1940	1940	1940	1940
																																					Wind	100	100	100	100	100	100	100	100	100	100	100	100
																																					solar	0	0	0	0	0	0	0	0	0	0	0	0
																																					hydropower	2732	2732	2732	2732	2732	2732	2732	2732	2732	4232	4232	4232
[truncated: 19 more columns]

## Sheet: Eskom_fossilfuel
Type	Country/area	Region	Subregion	Plant / Project name	Unit / Phase name	Plant / Project name (local)	Plant / Project name (other)	Capacity (MW)	Status	Start year	Retired year	Technology	Fuel	Country/area 1 (hydropower only)	Country/area 2 (hydropower only)	Country/area 1 Capacity (MW) (hydropower only)	Country/area 2 Capacity (MW) (hydropower only)	Owner	Parent	Latitude	Longitude	Location accuracy	City	Local area (taluk, county)	Major area (prefecture, district)	Subnational unit (state, province)	GEM.Wiki URL	GEM location ID	GEM unit/phase ID	CompISIN	Ownership	Plant capacity	Plant capacity	Age	Reinvestment year	Reinvestment year	Reinvestment year	Coal capacity factor 2020	Gas capacity factor 2020	Oil capacity factor 2020	Coal capacity factor 2021	Gas capacity factor 2021	Oil capacity factor 2021	Coal capacity factor 2022	Gas capacity factor 2022	Oil capacity factor 2022	Coal capacity factor 2023	Gas capacity factor 2023	Oil capacity factor 2023
coal	South Africa	Africa	Sub-Saharan Africa	Arnot power station	Unit 1			370	operating	1972	2026	subcritical	bituminous					Eskom Holdings SOC [100%]	Eskom Holdings SOC [100.0%]	-25.9438	29.792	exact	Rietkuil		Nkangala	Mpumalanga	https://www.gem.wiki/Arnot_power_station	L100000103438	G100000100348	ZAG000066697	1	7056		52	2012	2052	2092	0.592851	0	0	0.540416	0	0	0.533998	0	0	0.499642	0	0
coal	South Africa	Africa	Sub-Saharan Africa	Arnot power station	Unit 2			390	operating	1971	2026	subcritical	bituminous					Eskom Holdings SOC [100%]	Eskom Holdings SOC [100.0%]	-25.9438	29.792	exact	Rietkuil		Nkangala	Mpumalanga	https://www.gem.wiki/Arnot_power_station	L100000103438	G100000100349	ZAG000066697	1	7056		53	2011	2051	2091	0.592851	0	0	0.540416	0	0	0.51682	0	0	0.499642	0	0
coal	South Africa	Africa	Sub-Saharan Africa	Arnot power station	Unit 3			396	operating	1971	2026	subcritical	bituminous					Eskom Holdings SOC [100%]	Eskom Holdings SOC [100.0%]	-25.9438	29.792	exact	Rietkuil		Nkangala	Mpumalanga	https://www.gem.wiki/Arnot_power_station	L100000103438	G100000100350	ZAG000066697	1	7056		53	2011	2051	2091	0.592851	0	0	0.540416	0	0	0.51682	0	0	0.499642	0	0
coal	South Africa	Africa	Sub-Saharan Africa	Arnot power station	Unit 4			396	operating	1973	2027	subcritical	bituminous					Eskom Holdings SOC [100%]	Eskom Holdings SOC [100.0%]	-25.9438	29.792	exact	Rietkuil		Nkangala	Mpumalanga	https://www.gem.wiki/Arnot_power_station	L100000103438	G100000100351	ZAG000066697	1	7056		51	2013	2053	2093	0.592851	0	0	0.540416	0	0	0.51682	0	0	0.499642	0	0
coal	South Africa	Africa	Sub-Saharan Africa	Arnot power station	Unit 5			400	operating	1974	2029	subcritical	bituminous					Eskom Holdings SOC [100%]	Eskom Holdings SOC [100.0%]	-25.9438	29.792	exact	Rietkuil		Nkangala	Mpumalanga	https://www.gem.wiki/Arnot_power_station	L100000103438	G100000100352	ZAG000066697	1	7056		50	2014	2054	2094	0.592851	0	0	0.540416	0	0	0.51682	0	0	0.499642	0	0
coal	South Africa	Africa	Sub-Saharan Africa	Arnot power station	Unit 6			400	operating	1975	2029	subcritical	bituminous					Eskom Holdings SOC [100%]	Eskom Holdings SOC [100.0%]	-25.9438	29.792	exact	Rietkuil		Nkangala	Mpumalanga	https://www.gem.wiki/Arnot_power_station	L100000103438	G100000100353	ZAG000066697	1	7056	7056	49	2015	2055	2095	0.592851	0	0	0.540416	0	0	0.51682	0	0	0.499642	0	0
coal	South Africa	Africa	Sub-Saharan Africa	Camden power station	Unit 1			200	operating	1968	2025	subcritical	bituminous					Eskom Holdings SOC [100%]	Eskom Holdings SOC [100.0%]	-26.6215	30.0901	exact	Camden		Gert Sibande	Mpumalanga	https://www.gem.wiki/Camden_power_station	L100000103439	G100000101168	ZAG000066697	1	4800		56	2008	2048	2088	0.592851	0	0	0.540416	0	0	0.51682	0	0	0.499642	0	0
coal	South Africa	Africa	Sub-Saharan Africa	Camden power station	Unit 2			200	operating	1967	2025	subcritical	bituminous					Eskom Holdings SOC [100%]	Eskom Holdings SOC [100.0%]	-26.6215	30.0901	exact	Camden		Gert Sibande	Mpumalanga	https://www.gem.wiki/Camden_power_station	L100000103439	G100000101169	ZAG000066697	1	4800		57	2007	2047	2087	0.592851	0	0	0.540416	0	0	0.51682	0	0	0.499642	0	0
coal	South Africa	Africa	Sub-Saharan Africa	Camden power station	Unit 3			200	operating	1967	2025	subcritical	bituminous					Eskom Holdings SOC [100%]	Eskom Holdings SOC [100.0%]	-26.6215	30.0901	exact	Camden		Gert Sibande	Mpumalanga	https://www.gem.wiki/Camden_power_station	L100000103439	G100000101170	ZAG000066697	1	4800		57	2007	2047	2087	0.592851	0	0	0.540416	0	0	0.51682	0	0	0.499642	0	0
coal	South Africa	Africa	Sub-Saharan Africa	Camden power station	Unit 4			200	operating	1967	2025	subcritical	bituminous					Eskom Holdings SOC [100%]	Eskom Holdings SOC [100.0%]	-26.6215	30.0901	exact	Camden		Gert Sibande	Mpumalanga	https://www.gem.wiki/Camden_power_station	L100000103439	G100000101171	ZAG000066697	1	4800		57	2007	2047	2087	0.592851	0	0	0.540416	0	0	0.51682	0	0	0.499642	0	0
coal	South Africa	Africa	Sub-Saharan Africa	Camden power station	Unit 5			200	operating	1967	2025	subcritical	bituminous					Eskom Holdings SOC [100%]	Eskom Holdings SOC [100.0%]	-26.6215	30.0901	exact	Camden		Gert Sibande	Mpumalanga	https://www.gem.wiki/Camden_power_station	L100000103439	G100000101172	ZAG000066697	1	4800		57	2007	2047	2087	0.592851	0	0	0.540416	0	0	0.51682	0	0	0.499642	0	0
coal	South Africa	Africa	Sub-Saharan Africa	Camden power station	Unit 6			200	operating	1968	2025	subcritical	bituminous					Eskom Holdings SOC [100%]	Eskom Holdings SOC [100.0%]	-26.6215	30.0901	exact	Camden		Gert Sibande	Mpumalanga	https://www.gem.wiki/Camden_power_station	L100000103439	G100000101173	ZAG000066697	1	4800		56	2008	2048	2088	0.592851	0	0	0.540416	0	0	0.51682	0	0	0.499642	0	0
coal	South Africa	Africa	Sub-Saharan Africa	Camden power station	Unit 7			200	operating	1969	2025	subcritical	bituminous					Eskom Holdings SOC [100%]	Eskom Holdings SOC [100.0%]	-26.6215	30.0901	exact	Camden		Gert Sibande	Mpumalanga	https://www.gem.wiki/Camden_power_station	L100000103439	G100000101174	ZAG000066697	1	4800		55	2009	2049	2089	0.592851	0	0	0.540416	0	0	0.51682	0	0	0.499642	0	0
coal	South Africa	Africa	Sub-Saharan Africa	Camden power station	Unit 8			200	operating	1969	2025	subcritical	bituminous					Eskom Holdings SOC [100%]	Eskom Holdings SOC [100.0%]	-26.6215	30.0901	exact	Camden		Gert Sibande	Mpumalanga	https://www.gem.wiki/Camden_power_station	L100000103439	G100000101175	ZAG000066697	1	4800	4800	55	2009	2049	2089	0.592851	0	0	0.540416	0	0	0.51682	0	0	0.499642	0	0
coal	South Africa	Africa	Sub-Saharan Africa	Duvha power station	Unit 1			600	operating	1980	2031	subcritical	bituminous					Eskom Holdings SOC [100%]	Eskom Holdings SOC [100.0%]	-25.9613	29.3397	exact	Witbank		Nkangala	Mpumalanga	https://www.gem.wiki/Duvha_power_station	L100000103440	G100000102524	ZAG000066697	1	10800		44	2020	2060	2100	0.592851	0	0	0.540416	0	0	0.51682	0	0	0.499642	0	0
coal	South Africa	Africa	Sub-Saharan Africa	Duvha power station	Unit 2			600	operating	1980	2031	subcritical	bituminous					Eskom Holdings SOC [100%]	Eskom Holdings SOC [100.0%]	-25.9613	29.3397	exact	Witbank		Nkangala	Mpumalanga	https://www.gem.wiki/Duvha_power_station	L100000103440	G100000102525	ZAG000066697	1	10800		44	2020	2060	2100	0.592851	0	0	0.540416	0	0	0.51682	0	0	0.499642	0	0
coal	South Africa	Africa	Sub-Saharan Africa	Duvha power station	Unit 3			600	mothballed	1981	2032	subcritical	bituminous					Eskom Holdings SOC [100%]	Eskom Holdings SOC [100.0%]	-25.9613	29.3397	exact	Witbank		Nkangala	Mpumalanga	https://www.gem.wiki/Duvha_power_station	L100000103440	G100000102526	ZAG000066697	1	10800		43	2021	2061	2101	0.592851	0	0	0.540416	0	0	0.51682	0	0	0.499642	0	0
coal	South Africa	Africa	Sub-Saharan Africa	Duvha power station	Unit 4			600	operating	1982	2033	subcritical	bituminous					Eskom Holdings SOC [100%]	Eskom Holdings SOC [100.0%]	-25.9613	29.3397	exact	Witbank		Nkangala	Mpumalanga	https://www.gem.wiki/Duvha_power_station	L100000103440	G100000102527	ZAG000066697	1	10800		42	2022	2062	2102	0.592851	0	0	0.540416	0	0	0.51682	0	0	0.499642	0	0
coal	South Africa	Africa	Sub-Saharan Africa	Duvha power station	Unit 5			600	operating	1983	2033	subcritical	bituminous					Eskom Holdings SOC [100%]	Eskom Holdings SOC [100.0%]	-25.9613	29.3397	exact	Witbank		Nkangala	Mpumalanga	https://www.gem.wiki/Duvha_power_station	L100000103440	G100000102528	ZAG000066697	1	10800		41	2023	2063	2103	0.592851	0	0	0.540416	0	0	0.51682	0	0	0.499642	0	0
coal	South Africa	Africa	Sub-Saharan Africa	Duvha power station	Unit 6			600	operating	1984	2034	subcritical	bituminous					Eskom Holdings SOC [100%]	Eskom Holdings SOC [100.0%]	-25.9613	29.3397	exact	Witbank		Nkangala	Mpumalanga	https://www.gem.wiki/Duvha_power_station	L100000103440	G100000102529	ZAG000066697	1	10800	10800	40	2024	2064	2104	0.592851	0	0	0.540416	0	0	0.51682	0	0	0.499642	0	0
coal	South Africa	Africa	Sub-Saharan Africa	Grootvlei power station	Unit 1			200	operating	1973	2027	subcritical	bituminous					Eskom Holdings SOC [100%]	Eskom Holdings SOC [100.0%]	-26.7685	28.4978	exact	Grootvlei		Gert Sibande	Mpumalanga	https://www.gem.wiki/Grootvlei_power_station	L100000103441	G100000103136	ZAG000066697	1	3570		51	2013	2053	2093	0.592851	0	0	0.540416	0	0	0.51682	0	0	0.499642	0	0
coal	South Africa	Africa	Sub-Saharan Africa	Grootvlei power station	Unit 2			200	operating	1970	2027	subcritical	bituminous					Eskom Holdings SOC [100%]	Eskom Holdings SOC [100.0%]	-26.7685	28.4978	exact	Grootvlei		Gert Sibande	Mpumalanga	https://www.gem.wiki/Grootvlei_power_station	L100000103441	G100000103137	ZAG000066697	1	3570		54	2010	2050	2090	0.592851	0	0	0.540416	0	0	0.51682	0	0	0.499642	0	0
coal	South Africa	Africa	Sub-Saharan Africa	Grootvlei power station	Unit 3			200	operating	1969	2027	subcritical	bituminous					Eskom Holdings SOC [100%]	Eskom Holdings SOC [100.0%]	-26.7685	28.4978	exact	Grootvlei		Gert Sibande	Mpumalanga	https://www.gem.wiki/Grootvlei_power_station	L100000103441	G100000103138	ZAG000066697	1	3570		55	2009	2049	2089	0.592851	0	0	0.540416	0	0	0.51682	0	0	0.499642	0	0
coal	South Africa	Africa	Sub-Saharan Africa	Grootvlei power station	Unit 4			200	mothballed	1969	2025	subcritical	bituminous					Eskom Holdings SOC [100%]	Eskom Holdings SOC [100.0%]	-26.7685	28.4978	exact	Grootvlei		Gert Sibande	Mpumalanga	https://www.gem.wiki/Grootvlei_power_station	L100000103441	G100000103139	ZAG000066697	1	3570		55	2009	2049	2089	0.592851	0	0	0.540416	0	0	0.51682	0	0	0.499642	0	0
coal	South Africa	Africa	Sub-Saharan Africa	Grootvlei power station	Unit 5			190	mothballed	1971	2025	subcritical	bituminous					Eskom Holdings SOC [100%]	Eskom Holdings SOC [100.0%]	-26.7685	28.4978	exact	Grootvlei		Gert Sibande	Mpumalanga	https://www.gem.wiki/Grootvlei_power_station	L100000103441	G100000103140	ZAG000066697	1	3570		53	2011	2051	2091	0.592851	0	0	0.540416	0	0	0.51682	0	0	0.499642	0	0
coal	South Africa	Africa	Sub-Saharan Africa	Grootvlei power station	Unit 6			200	mothballed	1977	2025	subcritical	bituminous					Eskom Holdings SOC [100%]	Eskom Holdings SOC [100.0%]	-26.7685	28.4978	exact	Grootvlei		Gert Sibande	Mpumalanga	https://www.gem.wiki/Grootvlei_power_station	L100000103441	G100000103141	ZAG000066697	1	3570	3570	47	2017	2057	2097	0.592851	0	0	0.540416	0	0	0.51682	0	0	0.499642	0	0
coal	South Africa	Africa	Sub-Saharan Africa	Hendrina power station	Unit 1			200	mothballed	1972	2025	subcritical	bituminous					Eskom Holdings SOC [100%]	Eskom Holdings SOC [100.0%]	-26.032	29.6016	exact	Pullens Hope		Nkangala	Mpumalanga	https://www.gem.wiki/Hendrina_power_station	L100000103442	G100000103806	ZAG000066697	1	6000		52	2012	2052	2092	0.592851	0	0	0.540416	0	0	0.51682	0	0	0.499642	0	0
coal	South Africa	Africa	Sub-Saharan Africa	Hendrina power station	Unit 10			200	operating	1977	2025	subcritical	bituminous					Eskom Holdings SOC [100%]	Eskom Holdings SOC [100.0%]	-26.032	29.6016	exact	Pullens Hope		Nkangala	Mpumalanga	https://www.gem.wiki/Hendrina_power_station	L100000103442	G100000103807	ZAG000066697	1	6000		47	2017	2057	2097	0.592851	0	0	0.540416	0	0	0.51682	0	0	0.499642	0	0
coal	South Africa	Africa	Sub-Saharan Africa	Hendrina power station	Unit 2			200	operating	1971	2025	subcritical	bituminous					Eskom Holdings SOC [100%]	Eskom Holdings SOC [100.0%]	-26.032	29.6016	exact	Pullens Hope		Nkangala	Mpumalanga	https://www.gem.wiki/Hendrina_power_station	L100000103442	G100000103808	ZAG000066697	1	6000		53	2011	2051	2091	0.592851	0	0	0.540416	0	0	0.51682	0	0	0.499642	0	0
coal	South Africa	Africa	Sub-Saharan Africa	Hendrina power station	Unit 3			200	mothballed	1970	2025	subcritical	bituminous					Eskom Holdings SOC [100%]	Eskom Holdings SOC [100.0%]	-26.032	29.6016	exact	Pullens Hope		Nkangala	Mpumalanga	https://www.gem.wiki/Hendrina_power_station	L100000103442	G100000103809	ZAG000066697	1	6000		54	2010	2050	2090	0.592851	0	0	0.540416	0	0	0.51682	0	0	0.499642	0	0
coal	South Africa	Africa	Sub-Saharan Africa	Hendrina power station	Unit 4			200	operating	1970	2025	subcritical	bituminous					Eskom Holdings SOC [100%]	Eskom Holdings SOC [100.0%]	-26.032	29.6016	exact	Pullens Hope		Nkangala	Mpumalanga	https://www.gem.wiki/Hendrina_power_station	L100000103442	G100000103810	ZAG000066697	1	6000		54	2010	2050	2090	0.592851	0	0	0.540416	0	0	0.51682	0	0	0.499642	0	0
coal	South Africa	Africa	Sub-Saharan Africa	Hendrina power station	Unit 5			200	operating	1971	2025	subcritical	bituminous					Eskom Holdings SOC [100%]	Eskom Holdings SOC [100.0%]	-26.032	29.6016	exact	Pullens Hope		Nkangala	Mpumalanga	https://www.gem.wiki/Hendrina_power_station	L100000103442	G100000103811	ZAG000066697	1	6000		53	2011	2051	2091	0.592851	0	0	0.540416	0	0	0.51682	0	0	0.499642	0	0
coal	South Africa	Africa	Sub-Saharan Africa	Hendrina power station	Unit 6			200	operating	1973	2025	subcritical	bituminous					Eskom Holdings SOC [100%]	Eskom Holdings SOC [100.0%]	-26.032	29.6016	exact	Pullens Hope		Nkangala	Mpumalanga	https://www.gem.wiki/Hendrina_power_station	L100000103442	G100000103812	ZAG000066697	1	6000		51	2013	2053	2093	0.592851	0	0	0.540416	0	0	0.51682	0	0	0.499642	0	0
coal	South Africa	Africa	Sub-Saharan Africa	Hendrina power station	Unit 7			200	operating	1974	2025	subcritical	bituminous					Eskom Holdings SOC [100%]	Eskom Holdings SOC [100.0%]	-26.032	29.6016	exact	Pullens Hope		Nkangala	Mpumalanga	https://www.gem.wiki/Hendrina_power_station	L100000103442	G100000103813	ZAG000066697	1	6000		50	2014	2054	2094	0.592851	0	0	0.540416	0	0	0.51682	0	0	0.499642	0	0
coal	South Africa	Africa	Sub-Saharan Africa	Hendrina power station	Unit 8			200	operating	1975	2025	subcritical	bituminous					Eskom Holdings SOC [100%]	Eskom Holdings SOC [100.0%]	-26.032	29.6016	exact	Pullens Hope		Nkangala	Mpumalanga	https://www.gem.wiki/Hendrina_power_station	L100000103442	G100000103814	ZAG000066697	1	6000		49	2015	2055	2095	0.592851	0	0	0.540416	0	0	0.51682	0	0	0.499642	0	0
coal	South Africa	Africa	Sub-Saharan Africa	Hendrina power station	Unit 9			200	mothballed	1976	2025	subcritical	bituminous					Eskom Holdings SOC [100%]	Eskom Holdings SOC [100.0%]	-26.032	29.6016	exact	Pullens Hope		Nkangala	Mpumalanga	https://www.gem.wiki/Hendrina_power_station	L100000103442	G100000103815	ZAG000066697	1	6000	6000	48	2016	2056	2096	0.592851	0	0	0.540416	0	0	0.51682	0	0	0.499642	0	0
coal	South Africa	Africa	Sub-Saharan Africa	Kendal power station	Unit 1			686	operating	1988	2038	subcritical	bituminous					Eskom Holdings SOC [100%]	Eskom Holdings SOC [100.0%]	-26.0903	28.9688	exact	Kendal		Nkangala	Mpumalanga	https://www.gem.wiki/Kendal_power_station	L100000103443	G100000105663	ZAG000066697	1	12348		36	2028	2068	2108	0.592851	0	0	0.540416	0	0	0.51682	0	0	0.499642	0	0
coal	South Africa	Africa	Sub-Saharan Africa	Kendal power station	Unit 2			686	operating	1989	2039	subcritical	bituminous					Eskom Holdings SOC [100%]	Eskom Holdings SOC [100.0%]	-26.0903	28.9688	exact	Kendal		Nkangala	Mpumalanga	https://www.gem.wiki/Kendal_power_station	L100000103443	G100000105664	ZAG000066697	1	12348		35	2029	2069	2109	0.592851	0	0	0.540416	0	0	0.51682	0	0	0.499642	0	0
coal	South Africa	Africa	Sub-Saharan Africa	Kendal power station	Unit 3			686	operating	1990	2040	subcritical	bituminous					Eskom Holdings SOC [100%]	Eskom Holdings SOC [100.0%]	-26.0903	28.9688	exact	Kendal		Nkangala	Mpumalanga	https://www.gem.wiki/Kendal_power_station	L100000103443	G100000105665	ZAG000066697	1	12348		34	2030	2070	2110	0.592851	0	0	0.540416	0	0	0.51682	0	0	0.499642	0	0
coal	South Africa	Africa	Sub-Saharan Africa	Kendal power station	Unit 4			686	operating	1991	2041	subcritical	bituminous					Eskom Holdings SOC [100%]	Eskom Holdings SOC [100.0%]	-26.0903	28.9688	exact	Kendal		Nkangala	Mpumalanga	https://www.gem.wiki/Kendal_power_station	L100000103443	G100000105666	ZAG000066697	1	12348		33	2031	2071	2111	0.592851	0	0	0.540416	0	0	0.51682	0	0	0.499642	0	0
coal	South Africa	Africa	Sub-Saharan Africa	Kendal power station	Unit 5			686	operating	1992	2042	subcritical	bituminous					Eskom Holdings SOC [100%]	Eskom Holdings SOC [100.0%]	-26.0903	28.9688	exact	Kendal		Nkangala	Mpumalanga	https://www.gem.wiki/Kendal_power_station	L100000103443	G100000105667	ZAG000066697	1	12348		32	2032	2072	2112	0.592851	0	0	0.540416	0	0	0.51682	0	0	0.499642	0	0
coal	South Africa	Africa	Sub-Saharan Africa	Kendal power station	Unit 6			686	operating	1993	2043	subcritical	bituminous					Eskom Holdings SOC [100%]	Eskom Holdings SOC [100.0%]	-26.0903	28.9688	exact	Kendal		Nkangala	Mpumalanga	https://www.gem.wiki/Kendal_power_station	L100000103443	G100000105668	ZAG000066697	1	12348	12348	31	2033	2073	2113	0.592851	0	0	0.540416	0	0	0.51682	0	0	0.499642	0	0
coal	South Africa	Africa	Sub-Saharan Africa	Komati power station	Unit 1			100	retired	1961	2022	subcritical	bituminous					Eskom Holdings SOC [100%]	Eskom Holdings SOC [100.0%]	-26.0908	29.4745	exact	Middleburg			Mpumalanga	https://www.gem.wiki/Komati_power_station	L100000103446	G100000105828	ZAG000066697	1	3000		63	2001	2041	2081	0.592851	0	0	0.540416	0	0	0.51682	0	0	0.499642	0	0
coal	South Africa	Africa	Sub-Saharan Africa	Komati power station	Unit 2			100	retired	1962	2022	subcritical	bituminous					Eskom Holdings SOC [100%]	Eskom Holdings SOC [100.0%]	-26.0908	29.4745	exact	Middleburg			Mpumalanga	https://www.gem.wiki/Komati_power_station	L100000103446	G100000105829	ZAG000066697	1	3000		62	2002	2042	2082	0.592851	0	0	0.540416	0	0	0.51682	0	0	0.499642	0	0
coal	South Africa	Africa	Sub-Saharan Africa	Komati power station	Unit 3			100	retired	1962	2022	subcritical	bituminous					Eskom Holdings SOC [100%]	Eskom Holdings SOC [100.0%]	-26.0908	29.4745	exact	Middleburg			Mpumalanga	https://www.gem.wiki/Komati_power_station	L100000103446	G100000105830	ZAG000066697	1	3000		62	2002	2042	2082	0.592851	0	0	0.540416	0	0	0.51682	0	0	0.499642	0	0
coal	South Africa	Africa	Sub-Saharan Africa	Komati power station	Unit 4			100	retired	1963	2022	subcritical	bituminous					Eskom Holdings SOC [100%]	Eskom Holdings SOC [100.0%]	-26.0908	29.4745	exact	Middleburg			Mpumalanga	https://www.gem.wiki/Komati_power_station	L100000103446	G100000105831	ZAG000066697	1	3000		61	2003	2043	2083	0.592851	0	0	0.540416	0	0	0.51682	0	0	0.499642	0	0
coal	South Africa	Africa	Sub-Saharan Africa	Komati power station	Unit 5			100	retired	1963	2022	subcritical	bituminous					Eskom Holdings SOC [100%]	Eskom Holdings SOC [100.0%]	-26.0908	29.4745	exact	Middleburg			Mpumalanga	https://www.gem.wiki/Komati_power_station	L100000103446	G100000105832	ZAG000066697	1	3000		61	2003	2043	2083	0.592851	0	0	0.540416	0	0	0.51682	0	0	0.499642	0	0
coal	South Africa	Africa	Sub-Saharan Africa	Komati power station	Unit 6			125	retired	1964	2022	subcritical	bituminous					Eskom Holdings SOC [100%]	Eskom Holdings SOC [100.0%]	-26.0908	29.4745	exact	Middleburg			Mpumalanga	https://www.gem.wiki/Komati_power_station	L100000103446	G100000105833	ZAG000066697	1	3000		60	2004	2044	2084	0.592851	0	0	0.540416	0	0	0.51682	0	0	0.499642	0	0
coal	South Africa	Africa	Sub-Saharan Africa	Komati power station	Unit 7			125	retired	1964	2022	subcritical	bituminous					Eskom Holdings SOC [100%]	Eskom Holdings SOC [100.0%]	-26.0908	29.4745	exact	Middleburg			Mpumalanga	https://www.gem.wiki/Komati_power_station	L100000103446	G100000105834	ZAG000066697	1	3000		60	2004	2044	2084	0.592851	0	0	0.540416	0	0	0.51682	0	0	0.499642	0	0
coal	South Africa	Africa	Sub-Saharan Africa	Komati power station	Unit 8			125	retired	1964	2022	subcritical	bituminous					Eskom Holdings SOC [100%]	Eskom Holdings SOC [100.0%]	-26.0908	29.4745	exact	Middleburg			Mpumalanga	https://www.gem.wiki/Komati_power_station	L100000103446	G100000105835	ZAG000066697	1	3000		60	2004	2044	2084	0.592851	0	0	0.540416	0	0	0.51682	0	0	0.499642	0	0
coal	South Africa	Africa	Sub-Saharan Africa	Komati power station	Unit 9			125	retired	1964	2022	subcritical	bituminous					Eskom Holdings SOC [100%]	Eskom Holdings SOC [100.0%]	-26.0908	29.4745	exact	Middleburg			Mpumalanga	https://www.gem.wiki/Komati_power_station	L100000103446	G100000105836	ZAG000066697	1	3000	3000	60	2004	2044	2084	0.592851	0	0	0.540416	0	0	0.51682	0	0	0.499642	0	0
coal	South Africa	Africa	Sub-Saharan Africa	Kriel power station	Unit 1			500	operating	1976	2026	subcritical	bituminous					Eskom Holdings SOC [100%]	Eskom Holdings SOC [100.0%]	-26.2539	29.1785	exact	Kriel		Nkangala	Mpumalanga	https://www.gem.wiki/Kriel_power_station	L100000103447	G100000105964	ZAG000066697	1	9000		48	2016	2056	2096	0.592851	0	0	0.540416	0	0	0.51682	0	0	0.499642	0	0
coal	South Africa	Africa	Sub-Saharan Africa	Kriel power station	Unit 2			500	operating	1976	2027	subcritical	bituminous					Eskom Holdings SOC [100%]	Eskom Holdings SOC [100.0%]	-26.2539	29.1785	exact	Kriel		Nkangala	Mpumalanga	https://www.gem.wiki/Kriel_power_station	L100000103447	G100000105965	ZAG000066697	1	9000		48	2016	2056	2096	0.592851	0	0	0.540416	0	0	0.51682	0	0	0.499642	0	0
coal	South Africa	Africa	Sub-Saharan Africa	Kriel power station	Unit 3			500	operating	1977	2028	subcritical	bituminous					Eskom Holdings SOC [100%]	Eskom Holdings SOC [100.0%]	-26.2539	29.1785	exact	Kriel		Nkangala	Mpumalanga	https://www.gem.wiki/Kriel_power_station	L100000103447	G100000105966	ZAG000066697	1	9000		47	2017	2057	2097	0.592851	0	0	0.540416	0	0	0.51682	0	0	0.499642	0	0
coal	South Africa	Africa	Sub-Saharan Africa	Kriel power station	Unit 4			500	operating	1978	2029	subcritical	bituminous					Eskom Holdings SOC [100%]	Eskom Holdings SOC [100.0%]	-26.2539	29.1785	exact	Kriel		Nkangala	Mpumalanga	https://www.gem.wiki/Kriel_power_station	L100000103447	G100000105967	ZAG000066697	1	9000		46	2018	2058	2098	0.592851	0	0	0.540416	0	0	0.51682	0	0	0.499642	0	0
coal	South Africa	Africa	Sub-Saharan Africa	Kriel power station	Unit 5			500	operating	1979	2029	subcritical	bituminous					Eskom Holdings SOC [100%]	Eskom Holdings SOC [100.0%]	-26.2539	29.1785	exact	Kriel		Nkangala	Mpumalanga	https://www.gem.wiki/Kriel_power_station	L100000103447	G100000105968	ZAG000066697	1	9000		45	2019	2059	2099	0.592851	0	0	0.540416	0	0	0.51682	0	0	0.499642	0	0
coal	South Africa	Africa	Sub-Saharan Africa	Kriel power station	Unit 6			500	operating	1979	2030	subcritical	bituminous					Eskom Holdings SOC [100%]	Eskom Holdings SOC [100.0%]	-26.2539	29.1785	exact	Kriel		Nkangala	Mpumalanga	https://www.gem.wiki/Kriel_power_station	L100000103447	G100000105969	ZAG000066697	1	9000	9000	45	2019	2059	2099	0.592851	0	0	0.540416	0	0	0.51682	0	0	0.499642	0	0
coal	South Africa	Africa	Sub-Saharan Africa	Kusile power station	Unit 1			800	operating	2018	2069	supercritical	bituminous					Eskom Holdings SOC [100%]	Eskom Holdings SOC [100.0%]	-25.9201	28.9249	exact	Witbank			Mpumalanga	https://www.gem.wiki/Kusile_power_station	L100000103448	G100000106039	ZAG000066697	1	14400		6	2058	2098	2138	0.592851	0	0	0.540416	0	0	0.51682	0	0	0.499642	0	0
coal	South Africa	Africa	Sub-Saharan Africa	Kusile power station	Unit 2			800	operating	2020	2070	supercritical	bituminous					Eskom Holdings SOC [100%]	Eskom Holdings SOC [100.0%]	-25.9201	28.9249	exact	Witbank			Mpumalanga	https://www.gem.wiki/Kusile_power_station	L100000103448	G100000106040	ZAG000066697	1	14400		4	2060	2100	2140	0.592851	0	0	0.540416	0	0	0.51682	0	0	0.499642	0	0
coal	South Africa	Africa	Sub-Saharan Africa	Kusile power station	Unit 3			800	operating	2021	2071	supercritical	bituminous					Eskom Holdings SOC [100%]	Eskom Holdings SOC [100.0%]	-25.9201	28.9249	exact	Witbank			Mpumalanga	https://www.gem.wiki/Kusile_power_station	L100000103448	G100000106041	ZAG000066697	1	14400		3	2061	2101	2141	0.592851	0	0	0.540416	0	0	0.51682	0	0	0.499642	0	0
coal	South Africa	Africa	Sub-Saharan Africa	Kusile power station	Unit 4			800	operating	2022		supercritical	bituminous					Eskom Holdings SOC [100%]	Eskom Holdings SOC [100.0%]	-25.9201	28.9249	exact	Witbank			Mpumalanga	https://www.gem.wiki/Kusile_power_station	L100000103448	G100000106042	ZAG000066697	1	14400		2	2062	2102	2142	0.592851	0	0	0.540416	0	0	0.51682	0	0	0.499642	0	0
coal	South Africa	Africa	Sub-Saharan Africa	Kusile power station	Unit 5			800	construction	2024		supercritical	bituminous					Eskom Holdings SOC [100%]	Eskom Holdings SOC [100.0%]	-25.9201	28.9249	exact	Witbank			Mpumalanga	https://www.gem.wiki/Kusile_power_station	L100000103448	G100000106043	ZAG000066697	1	14400		0	2064	2104	2144	0.592851	0	0	0.540416	0	0	0.51682	0	0	0.499642	0	0
coal	South Africa	Africa	Sub-Saharan Africa	Kusile power station	Unit 6			800	construction	2025		supercritical	bituminous					Eskom Holdings SOC [100%]	Eskom Holdings SOC [100.0%]	-25.9201	28.9249	exact	Witbank			Mpumalanga	https://www.gem.wiki/Kusile_power_station	L100000103448	G100000106044	ZAG000066697	1	14400	14400	-1	2065	2105	2145	0.592851	0	0	0.540416	0	0	0.51682	0	0	0.499642	0	0
coal	South Africa	Africa	Sub-Saharan Africa	Lethabo power station	Unit 1			618	operating	1985	2035	subcritical	bituminous					Eskom Holdings SOC [100%]	Eskom Holdings SOC [100.0%]	-26.742	27.9769	exact	Viljoensdrif		Fezile Dabi	Free State	https://www.gem.wiki/Lethabo_power_station	L100000103423	G100000106240	ZAG000066697	1	11124		39	2025	2065	2105	0.592851	0	0	0.540416	0	0	0.51682	0	0	0.499642	0	0
coal	South Africa	Africa	Sub-Saharan Africa	Lethabo power station	Unit 2			618	operating	1986	2036	subcritical	bituminous					Eskom Holdings SOC [100%]	Eskom Holdings SOC [100.0%]	-26.742	27.9769	exact	Viljoensdrif		Fezile Dabi	Free State	https://www.gem.wiki/Lethabo_power_station	L100000103423	G100000106241	ZAG000066697	1	11124		38	2026	2066	2106	0.592851	0	0	0.540416	0	0	0.51682	0	0	0.499642	0	0
coal	South Africa	Africa	Sub-Saharan Africa	Lethabo power station	Unit 3			618	operating	1987	2037	subcritical	bituminous					Eskom Holdings SOC [100%]	Eskom Holdings SOC [100.0%]	-26.742	27.9769	exact	Viljoensdrif		Fezile Dabi	Free State	https://www.gem.wiki/Lethabo_power_station	L100000103423	G100000106242	ZAG000066697	1	11124		37	2027	2067	2107	0.592851	0	0	0.540416	0	0	0.51682	0	0	0.499642	0	0
coal	South Africa	Africa	Sub-Saharan Africa	Lethabo power station	Unit 4			618	operating	1987	2037	subcritical	bituminous					Eskom Holdings SOC [100%]	Eskom Holdings SOC [100.0%]	-26.742	27.9769	exact	Viljoensdrif		Fezile Dabi	Free State	https://www.gem.wiki/Lethabo_power_station	L100000103423	G100000106243	ZAG000066697	1	11124		37	2027	2067	2107	0.592851	0	0	0.540416	0	0	0.51682	0	0	0.499642	0	0
coal	South Africa	Africa	Sub-Saharan Africa	Lethabo power station	Unit 5			618	operating	1989	2039	subcritical	bituminous					Eskom Holdings SOC [100%]	Eskom Holdings SOC [100.0%]	-26.742	27.9769	exact	Viljoensdrif		Fezile Dabi	Free State	https://www.gem.wiki/Lethabo_power_station	L100000103423	G100000106244	ZAG000066697	1	11124		35	2029	2069	2109	0.592851	0	0	0.540416	0	0	0.51682	0	0	0.499642	0	0
coal	South Africa	Africa	Sub-Saharan Africa	Lethabo power station	Unit 6			618	operating	1990	2040	subcritical	bituminous					Eskom Holdings SOC [100%]	Eskom Holdings SOC [100.0%]	-26.742	27.9769	exact	Viljoensdrif		Fezile Dabi	Free State	https://www.gem.wiki/Lethabo_power_station	L100000103423	G100000106245	ZAG000066697	1	11124	11124	34	2030	2070	2110	0.592851	0	0	0.540416	0	0	0.51682	0	0	0.499642	0	0
coal	South Africa	Africa	Sub-Saharan Africa	Majuba power station	Unit 1			665	operating	1996	2046	subcritical	bituminous					Eskom Holdings SOC [100%]	Eskom Holdings SOC [100.0%]	-27.1006	29.771	exact	Amersfoort		Gert Sibande	Mpumalanga	https://www.gem.wiki/Majuba_power_station	L100000103449	G100000106600	ZAG000066697	1	12429		28	2036	2076	2116	0.592851	0	0	0.540416	0	0	0.51682	0	0	0.499642	0	0
coal	South Africa	Africa	Sub-Saharan Africa	Majuba power station	Unit 2			665	operating	1997	2047	subcritical	bituminous					Eskom Holdings SOC [100%]	Eskom Holdings SOC [100.0%]	-27.1006	29.771	exact	Amersfoort		Gert Sibande	Mpumalanga	https://www.gem.wiki/Majuba_power_station	L100000103449	G100000106601	ZAG000066697	1	12429		27	2037	2077	2117	0.592851	0	0	0.540416	0	0	0.51682	0	0	0.499642	0	0
coal	South Africa	Africa	Sub-Saharan Africa	Majuba power station	Unit 3			665	operating	1998	2048	subcritical	bituminous					Eskom Holdings SOC [100%]	Eskom Holdings SOC [100.0%]	-27.1006	29.771	exact	Amersfoort		Gert Sibande	Mpumalanga	https://www.gem.wiki/Majuba_power_station	L100000103449	G100000106602	ZAG000066697	1	12429		26	2038	2078	2118	0.592851	0	0	0.540416	0	0	0.51682	0	0	0.499642	0	0
coal	South Africa	Africa	Sub-Saharan Africa	Majuba power station	Unit 4			716	operating	1999	2049	subcritical	bituminous					Eskom Holdings SOC [100%]	Eskom Holdings SOC [100.0%]	-27.1006	29.771	exact	Amersfoort		Gert Sibande	Mpumalanga	https://www.gem.wiki/Majuba_power_station	L100000103449	G100000106603	ZAG000066697	1	12429		25	2039	2079	2119	0.592851	0	0	0.540416	0	0	0.51682	0	0	0.499642	0	0
coal	South Africa	Africa	Sub-Saharan Africa	Majuba power station	Unit 5			716	operating	2000	2050	subcritical	bituminous					Eskom Holdings SOC [100%]	Eskom Holdings SOC [100.0%]	-27.1006	29.771	exact	Amersfoort		Gert Sibande	Mpumalanga	https://www.gem.wiki/Majuba_power_station	L100000103449	G100000106604	ZAG000066697	1	12429		24	2040	2080	2120	0.592851	0	0	0.540416	0	0	0.51682	0	0	0.499642	0	0
coal	South Africa	Africa	Sub-Saharan Africa	Majuba power station	Unit 6			716	operating	2001	2051	subcritical	bituminous					Eskom Holdings SOC [100%]	Eskom Holdings SOC [100.0%]	-27.1006	29.771	exact	Amersfoort		Gert Sibande	Mpumalanga	https://www.gem.wiki/Majuba_power_station	L100000103449	G100000106605	ZAG000066697	1	12429	12429	23	2041	2081	2121	0.592851	0	0	0.540416	0	0	0.51682	0	0	0.499642	0	0
coal	South Africa	Africa	Sub-Saharan Africa	Matimba power station	Unit 1			665	operating	1987	2037	subcritical	bituminous					Eskom Holdings SOC [100%]	Eskom Holdings SOC [100.0%]	-23.6688	27.6108	exact	Lephalale		Waterberg	Limpopo	https://www.gem.wiki/Matimba_power_station	L100000103431	G100000106720	ZAG000066697	1	11970		37	2027	2067	2107	0.592851	0	0	0.540416	0	0	0.51682	0	0	0.499642	0	0
coal	South Africa	Africa	Sub-Saharan Africa	Matimba power station	Unit 2			665	operating	1987	2037	subcritical	bituminous					Eskom Holdings SOC [100%]	Eskom Holdings SOC [100.0%]	-23.6688	27.6108	exact	Lephalale		Waterberg	Limpopo	https://www.gem.wiki/Matimba_power_station	L100000103431	G100000106721	ZAG000066697	1	11970		37	2027	2067	2107	0.592851	0	0	0.540416	0	0	0.51682	0	0	0.499642	0	0
coal	South Africa	Africa	Sub-Saharan Africa	Matimba power station	Unit 3			665	operating	1988	2038	subcritical	bituminous					Eskom Holdings SOC [100%]	Eskom Holdings SOC [100.0%]	-23.6688	27.6108	exact	Lephalale		Waterberg	Limpopo	https://www.gem.wiki/Matimba_power_station	L100000103431	G100000106722	ZAG000066697	1	11970		36	2028	2068	2108	0.592851	0	0	0.540416	0	0	0.51682	0	0	0.499642	0	0
coal	South Africa	Africa	Sub-Saharan Africa	Matimba power station	Unit 4			665	operating	1989	2039	subcritical	bituminous					Eskom Holdings SOC [100%]	Eskom Holdings SOC [100.0%]	-23.6688	27.6108	exact	Lephalale		Waterberg	Limpopo	https://www.gem.wiki/Matimba_power_station	L100000103431	G100000106723	ZAG000066697	1	11970		35	2029	2069	2109	0.592851	0	0	0.540416	0	0	0.51682	0	0	0.499642	0	0
coal	South Africa	Africa	Sub-Saharan Africa	Matimba power station	Unit 5			665	operating	1990	2040	subcritical	bituminous					Eskom Holdings SOC [100%]	Eskom Holdings SOC [100.0%]	-23.6688	27.6108	exact	Lephalale		Waterberg	Limpopo	https://www.gem.wiki/Matimba_power_station	L100000103431	G100000106724	ZAG000066697	1	11970		34	2030	2070	2110	0.592851	0	0	0.540416	0	0	0.51682	0	0	0.499642	0	0
coal	South Africa	Africa	Sub-Saharan Africa	Matimba power station	Unit 6			665	operating	1991	2041	subcritical	bituminous					Eskom Holdings SOC [100%]	Eskom Holdings SOC [100.0%]	-23.6688	27.6108	exact	Lephalale		Waterberg	Limpopo	https://www.gem.wiki/Matimba_power_station	L100000103431	G100000106725	ZAG000066697	1	11970	11970	33	2031	2071	2111	0.592851	0	0	0.540416	0	0	0.51682	0	0	0.499642	0	0
coal	South Africa	Africa	Sub-Saharan Africa	Matla power station	Unit 1			600	operating	1979	2030	subcritical	bituminous					Eskom Holdings SOC [100%]	Eskom Holdings SOC [100.0%]	-26.2813	29.1415	exact	Kriel		Nkangala	Mpumalanga	https://www.gem.wiki/Matla_power_station	L100000103450	G100000106726	ZAG000066697	1	10800		45	2019	2059	2099	0.592851	0	0	0.540416	0	0	0.51682	0	0	0.499642	0	0
coal	South Africa	Africa	Sub-Saharan Africa	Matla power station	Unit 2			600	operating	1980	2031	subcritical	bituminous					Eskom Holdings SOC [100%]	Eskom Holdings SOC [100.0%]	-26.2813	29.1415	exact	Kriel		Nkangala	Mpumalanga	https://www.gem.wiki/Matla_power_station	L100000103450	G100000106727	ZAG000066697	1	10800		44	2020	2060	2100	0.592851	0	0	0.540416	0	0	0.51682	0	0	0.499642	0	0
coal	South Africa	Africa	Sub-Saharan Africa	Matla power station	Unit 3			600	operating	1980	2031	subcritical	bituminous					Eskom Holdings SOC [100%]	Eskom Holdings SOC [100.0%]	-26.2813	29.1415	exact	Kriel		Nkangala	Mpumalanga	https://www.gem.wiki/Matla_power_station	L100000103450	G100000106728	ZAG000066697	1	10800		44	2020	2060	2100	0.592851	0	0	0.540416	0	0	0.51682	0	0	0.499642	0	0
coal	South Africa	Africa	Sub-Saharan Africa	Matla power station	Unit 4			600	operating	1981	2032	subcritical	bituminous					Eskom Holdings SOC [100%]	Eskom Holdings SOC [100.0%]	-26.2813	29.1415	exact	Kriel		Nkangala	Mpumalanga	https://www.gem.wiki/Matla_power_station	L100000103450	G100000106729	ZAG000066697	1	10800		43	2021	2061	2101	0.592851	0	0	0.540416	0	0	0.51682	0	0	0.499642	0	0
coal	South Africa	Africa	Sub-Saharan Africa	Matla power station	Unit 5			600	operating	1982	2033	subcritical	bituminous					Eskom Holdings SOC [100%]	Eskom Holdings SOC [100.0%]	-26.2813	29.1415	exact	Kriel		Nkangala	Mpumalanga	https://www.gem.wiki/Matla_power_station	L100000103450	G100000106730	ZAG000066697	1	10800		42	2022	2062	2102	0.592851	0	0	0.540416	0	0	0.51682	0	0	0.499642	0	0
coal	South Africa	Africa	Sub-Saharan Africa	Matla power station	Unit 6			600	operating	1983	2034	subcritical	bituminous					Eskom Holdings SOC [100%]	Eskom Holdings SOC [100.0%]	-26.2813	29.1415	exact	Kriel		Nkangala	Mpumalanga	https://www.gem.wiki/Matla_power_station	L100000103450	G100000106731	ZAG000066697	1	10800	10800	41	2023	2063	2103	0.592851	0	0	0.540416	0	0	0.51682	0	0	0.499642	0	0
coal	South Africa	Africa	Sub-Saharan Africa	Medupi power station	Unit 1			794.8	operating	2021	2071	supercritical	bituminous					Eskom Holdings SOC [100%]	Eskom Holdings SOC [100.0%]	-23.705	27.5638	exact	Lephalale			Limpopo	https://www.gem.wiki/Medupi_power_station	L100000103432	G100000106780	ZAG000066697	1	14306.4		3	2061	2101	2141	0.592851	0	0	0.540416	0	0	0.51682	0	0	0.499642	0	0
coal	South Africa	Africa	Sub-Saharan Africa	Medupi power station	Unit 2			794.8	operating	2019	2069	supercritical	bituminous					Eskom Holdings SOC [100%]	Eskom Holdings SOC [100.0%]	-23.705	27.5638	exact	Lephalale			Limpopo	https://www.gem.wiki/Medupi_power_station	L100000103432	G100000106781	ZAG000066697	1	14306.4		5	2059	2099	2139	0.592851	0	0	0.540416	0	0	0.51682	0	0	0.499642	0	0
coal	South Africa	Africa	Sub-Saharan Africa	Medupi power station	Unit 3			794.8	operating	2019	2068	supercritical	bituminous					Eskom Holdings SOC [100%]	Eskom Holdings SOC [100.0%]	-23.705	27.5638	exact	Lephalale			Limpopo	https://www.gem.wiki/Medupi_power_station	L100000103432	G100000106782	ZAG000066697	1	14306.4		5	2059	2099	2139	0.592851	0	0	0.540416	0	0	0.51682	0	0	0.499642	0	0
coal	South Africa	Africa	Sub-Saharan Africa	Medupi power station	Unit 4			794.8	operating	2017	2067	supercritical	bituminous					Eskom Holdings SOC [100%]	Eskom Holdings SOC [100.0%]	-23.705	27.5638	exact	Lephalale			Limpopo	https://www.gem.wiki/Medupi_power_station	L100000103432	G100000106783	ZAG000066697	1	14306.4		7	2057	2097	2137	0.592851	0	0	0.540416	0	0	0.51682	0	0	0.499642	0	0
coal	South Africa	Africa	Sub-Saharan Africa	Medupi power station	Unit 5			794.8	operating	2017	2067	supercritical	bituminous					Eskom Holdings SOC [100%]	Eskom Holdings SOC [100.0%]	-23.705	27.5638	exact	Lephalale			Limpopo	https://www.gem.wiki/Medupi_power_station	L100000103432	G100000106784	ZAG000066697	1	14306.4		7	2057	2097	2137	0.592851	0	0	0.540416	0	0	0.51682	0	0	0.499642	0	0
coal	South Africa	Africa	Sub-Saharan Africa	Medupi power station	Unit 6			794.8	operating	2015	2065	supercritical	bituminous					Eskom Holdings SOC [100%]	Eskom Holdings SOC [100.0%]	-23.705	27.5638	exact	Lephalale			Limpopo	https://www.gem.wiki/Medupi_power_station	L100000103432	G100000106785	ZAG000066697	1	14306.4	14306.4	9	2055	2095	2135	0.592851	0	0	0.540416	0	0	0.51682	0	0	0.499642	0	0
coal	South Africa	Africa	Sub-Saharan Africa	Tutuka power station	Unit 1			609	operating	1985	2035	subcritical	bituminous					Eskom Holdings SOC [100%]	Eskom Holdings SOC [100.0%]	-26.7772	29.3524	exact	Standerton		Gert Sibande	Mpumalanga	https://www.gem.wiki/Tutuka_power_station	L100000103452	G100000110396	ZAG000066697	1	10962		39	2025	2065	2105	0.592851	0	0	0.540416	0	0	0.51682	0	0	0.499642	0	0
coal	South Africa	Africa	Sub-Saharan Africa	Tutuka power station	Unit 2			609	operating	1985	2035	subcritical	bituminous					Eskom Holdings SOC [100%]	Eskom Holdings SOC [100.0%]	-26.7772	29.3524	exact	Standerton		Gert Sibande	Mpumalanga	https://www.gem.wiki/Tutuka_power_station	L100000103452	G100000110397	ZAG000066697	1	10962		39	2025	2065	2105	0.592851	0	0	0.540416	0	0	0.51682	0	0	0.499642	0	0
coal	South Africa	Africa	Sub-Saharan Africa	Tutuka power station	Unit 3			609	operating	1986	2036	subcritical	bituminous					Eskom Holdings SOC [100%]	Eskom Holdings SOC [100.0%]	-26.7772	29.3524	exact	Standerton		Gert Sibande	Mpumalanga	https://www.gem.wiki/Tutuka_power_station	L100000103452	G100000110398	ZAG000066697	1	10962		38	2026	2066	2106	0.592851	0	0	0.540416	0	0	0.51682	0	0	0.499642	0	0
coal	South Africa	Africa	Sub-Saharan Africa	Tutuka power station	Unit 4			609	operating	1987	2037	subcritical	bituminous					Eskom Holdings SOC [100%]	Eskom Holdings SOC [100.0%]	-26.7772	29.3524	exact	Standerton		Gert Sibande	Mpumalanga	https://www.gem.wiki/Tutuka_power_station	L100000103452	G100000110399	ZAG000066697	1	10962		37	2027	2067	2107	0.592851	0	0	0.540416	0	0	0.51682	0	0	0.499642	0	0
coal	South Africa	Africa	Sub-Saharan Africa	Tutuka power station	Unit 5			609	operating	1988	2038	subcritical	bituminous					Eskom Holdings SOC [100%]	Eskom Holdings SOC [100.0%]	-26.7772	29.3524	exact	Standerton		Gert Sibande	Mpumalanga	https://www.gem.wiki/Tutuka_power_station	L100000103452	G100000110400	ZAG000066697	1	10962		36	2028	2068	2108	0.592851	0	0	0.540416	0	0	0.51682	0	0	0.499642	0	0
coal	South Africa	Africa	Sub-Saharan Africa	Tutuka power station	Unit 6			609	operating	1990	2040	subcritical	bituminous					Eskom Holdings SOC [100%]	Eskom Holdings SOC [100.0%]	-26.7772	29.3524	exact	Standerton		Gert Sibande	Mpumalanga	https://www.gem.wiki/Tutuka_power_station	L100000103452	G100000110401	ZAG000066697	1	10962	10962	34	2030	2070	2110	0.592851	0	0	0.540416	0	0	0.51682	0	0	0.499642	0	0
oil/gas	South Africa	Africa	Sub-Saharan Africa	Acacia power station	1			57	operating	1976		GT	KER					Eskom Holdings SOC Ltd [100.0%]	Eskom Holdings SOC Ltd [100.0%]	-33.8831	18.5358	exact	Cape Town			Western Cape	https://www.gem.wiki/Acacia_power_station	L100000408170	G100000411354	ZAG000066697	1	513		48	2016	2056	2096	0	0	0.191	0	0	0.191	0	0	0.191	0	0	0.191
oil/gas	South Africa	Africa	Sub-Saharan Africa	Acacia power station	2			57	operating	1976		GT	KER					Eskom Holdings SOC Ltd [100.0%]	Eskom Holdings SOC Ltd [100.0%]	-33.8831	18.5358	exact	Cape Town			Western Cape	https://www.gem.wiki/Acacia_power_station	L100000408170	G100000411353	ZAG000066697	1	513		48	2016	2056	2096	0	0	0.191	0	0	0.191	0	0	0.191	0	0	0.191
oil/gas	South Africa	Africa	Sub-Saharan Africa	Acacia power station	3			57	operating	1976		GT	KER					Eskom Holdings SOC Ltd [100.0%]	Eskom Holdings SOC Ltd [100.0%]	-33.8831	18.5358	exact	Cape Town			Western Cape	https://www.gem.wiki/Acacia_power_station	L100000408170	G100000411352	ZAG000066697	1	513	513	48	2016	2056	2096	0	0	0.191	0	0	0.191	0	0	0.191	0	0	0.191
oil/gas	South Africa	Africa	Sub-Saharan Africa	Ankerlig power station	1-1			149.2	operating	2007		GT	D					Eskom Holdings SOC Ltd [100.0%]	Eskom Holdings SOC Ltd [100.0%]	-33.5895	18.4615	exact	Atlantis			Western Cape	https://www.gem.wiki/Ankerlig_power_station	L100000407107	G100000408556	ZAG000066697	1	4014.9		17	2047	2087	2127	0	0	0.191	0	0	0.191	0	0	0.191	0	0	0.191
oil/gas	South Africa	Africa	Sub-Saharan Africa	Ankerlig power station	1-2			149.2	operating	2007		GT	D					Eskom Holdings SOC Ltd [100.0%]	Eskom Holdings SOC Ltd [100.0%]	-33.5895	18.4615	exact	Atlantis			Western Cape	https://www.gem.wiki/Ankerlig_power_station	L100000407107	G100000414357	ZAG000066697	1	4014.9		17	2047	2087	2127	0	0	0.191	0	0	0.191	0	0	0.191	0	0	0.191
oil/gas	South Africa	Africa	Sub-Saharan Africa	Ankerlig power station	1-3			149.2	operating	2007		GT	D					Eskom Holdings SOC Ltd [100.0%]	Eskom Holdings SOC Ltd [100.0%]	-33.5895	18.4615	exact	Atlantis			Western Cape	https://www.gem.wiki/Ankerlig_power_station	L100000407107	G100000414356	ZAG000066697	1	4014.9		17	2047	2087	2127	0	0	0.191	0	0	0.191	0	0	0.191	0	0	0.191
oil/gas	South Africa	Africa	Sub-Saharan Africa	Ankerlig power station	1-4			149.2	operating	2007		GT	D					Eskom Holdings SOC Ltd [100.0%]	Eskom Holdings SOC Ltd [100.0%]	-33.5895	18.4615	exact	Atlantis			Western Cape	https://www.gem.wiki/Ankerlig_power_station	L100000407107	G100000414355	ZAG000066697	1	4014.9		17	2047	2087	2127	0	0	0.191	0	0	0.191	0	0	0.191	0	0	0.191
oil/gas	South Africa	Africa	Sub-Saharan Africa	Ankerlig power station	2-1			148.3	operating	2009		GT	D					Eskom Holdings SOC Ltd [100.0%]	Eskom Holdings SOC Ltd [100.0%]	-33.5895	18.4615	exact	Atlantis			Western Cape	https://www.gem.wiki/Ankerlig_power_station	L100000407107	G100000413925	ZAG000066697	1	4014.9		15	2049	2089	2129	0	0	0.191	0	0	0.191	0	0	0.191	0	0	0.191
oil/gas	South Africa	Africa	Sub-Saharan Africa	Ankerlig power station	2-2			148.3	operating	2009		GT	D					Eskom Holdings SOC Ltd [100.0%]	Eskom Holdings SOC Ltd [100.0%]	-33.5895	18.4615	exact	Atlantis			Western Cape	https://www.gem.wiki/Ankerlig_power_station	L100000407107	G100000414354	ZAG000066697	1	4014.9		15	2049	2089	2129	0	0	0.191	0	0	0.191	0	0	0.191	0	0	0.191
oil/gas	South Africa	Africa	Sub-Saharan Africa	Ankerlig power station	2-3			148.3	operating	2009		GT	D					Eskom Holdings SOC Ltd [100.0%]	Eskom Holdings SOC Ltd [100.0%]	-33.5895	18.4615	exact	Atlantis			Western Cape	https://www.gem.wiki/Ankerlig_power_station	L100000407107	G100000414353	ZAG000066697	1	4014.9		15	2049	2089	2129	0	0	0.191	0	0	0.191	0	0	0.191	0	0	0.191
oil/gas	South Africa	Africa	Sub-Saharan Africa	Ankerlig power station	2-4			148.3	operating	2009		GT	D					Eskom Holdings SOC Ltd [100.0%]	Eskom Holdings SOC Ltd [100.0%]	-33.5895	18.4615	exact	Atlantis			Western Cape	https://www.gem.wiki/Ankerlig_power_station	L100000407107	G100000414352	ZAG000066697	1	4014.9		15	2049	2089	2129	0	0	0.191	0	0	0.191	0	0	0.191	0	0	0.191
oil/gas	South Africa	Africa	Sub-Saharan Africa	Ankerlig power station	2-5			148.3	operating	2009		GT	D					Eskom Holdings SOC Ltd [100.0%]	Eskom Holdings SOC Ltd [100.0%]	-33.5895	18.4615	exact	Atlantis			Western Cape	https://www.gem.wiki/Ankerlig_power_station	L100000407107	G100000414351	ZAG000066697	1	4014.9	4014.9	15	2049	2089	2129	0	0	0.191	0	0	0.191	0	0	0.191	0	0	0.191
oil/gas	South Africa	Africa	Sub-Saharan Africa	Gourikwa power station	1			148	operating	2007		GT	D					Eskom Holdings SOC Ltd [100.0%]	Eskom Holdings SOC Ltd [100.0%]	-34.1668	21.9607	exact	Mossel Bay			Western Cape	https://www.gem.wiki/Gourikwa_power_station	L100000407108	G100000408557	ZAG000066697	1	2220		17	2047	2087	2127	0	0	0.191	0	0	0.191	0	0	0.191	0	0	0.191
oil/gas	South Africa	Africa	Sub-Saharan Africa	Gourikwa power station	2			148	operating	2007		GT	D					Eskom Holdings SOC Ltd [100.0%]	Eskom Holdings SOC Ltd [100.0%]	-34.1668	21.9607	exact	Mossel Bay			Western Cape	https://www.gem.wiki/Gourikwa_power_station	L100000407108	G100000410887	ZAG000066697	1	2220		17	2047	2087	2127	0	0	0.191	0	0	0.191	0	0	0.191	0	0	0.191
oil/gas	South Africa	Africa	Sub-Saharan Africa	Gourikwa power station	3			148	operating	2007		GT	D					Eskom Holdings SOC Ltd [100.0%]	Eskom Holdings SOC Ltd [100.0%]	-34.1668	21.9607	exact	Mossel Bay			Western Cape	https://www.gem.wiki/Gourikwa_power_station	L100000407108	G100000410886	ZAG000066697	1	2220		17	2047	2087	2127	0	0	0.191	0	0	0.191	0	0	0.191	0	0	0.191
oil/gas	South Africa	Africa	Sub-Saharan Africa	Gourikwa power station	4			148	operating	2009		GT	D					Eskom Holdings SOC Ltd [100.0%]	Eskom Holdings SOC Ltd [100.0%]	-34.1668	21.9607	exact	Mossel Bay			Western Cape	https://www.gem.wiki/Gourikwa_power_station	L100000407108	G100000410885	ZAG000066697	1	2220		15	2049	2089	2129	0	0	0.191	0	0	0.191	0	0	0.191	0	0	0.191
oil/gas	South Africa	Africa	Sub-Saharan Africa	Gourikwa power station	5			148	operating	2009		GT	D					Eskom Holdings SOC Ltd [100.0%]	Eskom Holdings SOC Ltd [100.0%]	-34.1668	21.9607	exact	Mossel Bay			Western Cape	https://www.gem.wiki/Gourikwa_power_station	L100000407108	G100000410884	ZAG000066697	1	2220	2220	15	2049	2089	2129	0	0	0.191	0	0	0.191	0	0	0.191	0	0	0.191
oil/gas	South Africa	Africa	Sub-Saharan Africa	Port Rex power station	4			57	operating	1976		GT	KER					Eskom Holdings SOC Ltd [100.0%]	Eskom Holdings SOC Ltd [100.0%]	-33.028	27.8818	exact	East London				https://www.gem.wiki/Port_Rex_power_station	L100000408172	G100000411351	ZAG000066697	1	513		48	2016	2056	2096	0	0	0.191	0	0	0.191	0	0	0.191	0	0	0.191
oil/gas	South Africa	Africa	Sub-Saharan Africa	Port Rex power station	5			57	operating	1976		GT	KER					Eskom Holdings SOC Ltd [100.0%]	Eskom Holdings SOC Ltd [100.0%]	-33.028	27.8818	exact	East London				https://www.gem.wiki/Port_Rex_power_station	L100000408172	G100000411350	ZAG000066697	1	513		48	2016	2056	2096	0	0	0.191	0	0	0.191	0	0	0.191	0	0	0.191
oil/gas	South Africa	Africa	Sub-Saharan Africa	Port Rex power station	6			57	operating	1976		GT	KER					Eskom Holdings SOC Ltd [100.0%]	Eskom Holdings SOC Ltd [100.0%]	-33.028	27.8818	exact	East London				https://www.gem.wiki/Port_Rex_power_station	L100000408172	G100000411349	ZAG000066697	1	513	513	48	2016	2056	2096	0	0	0.191	0	0	0.191	0	0	0.191	0	0	0.191
oil/gas	South Africa	Africa	Sub-Saharan Africa	Richards Bay (Eskom) power station	1			3000	pre-construction			CC	LNG					Eskom Holdings SOC Ltd [100.0%]	Eskom Holdings SOC Ltd [100.0%]	-28.771	31.9765	exact	Richards Bay			KwaZulu-Natal	https://www.gem.wiki/Richards_Bay_(Eskom)_power_station	L100000407360	G100000409408	ZAG000066697	1	9000	9000	-99	40	80	120	0	0.0629299	0	0	0.0690428	0	0	0.114771	0	0	0.143014	0
Type	Country/area	Region	Subregion	Plant / Project name	Unit / Phase name	Plant / Project name (local)	Plant / Project name (other)	Capacity (MW)	Status	Start year	Retired year	Technology	Fuel	Country/area 1 (hydropower only)	Country/area 2 (hydropower only)	Country/area 1 Capacity (MW) (hydropower only)	Country/area 2 Capacity (MW) (hydropower only)	Owner	Parent	Latitude	Longitude	Location accuracy	City	Local area (taluk, county)	Major area (prefecture, district)	Subnational unit (state, province)	GEM.Wiki URL	GEM location ID	GEM unit/phase ID	CompISIN	Ownership	Plant capacity	Plant capacity	Age	Reinvestment year	Reinvestment year	Reinvestment year	2020	2021	2022	2023	2024	2025	2026	2027	2028	2029	2030	2031
coal	South Africa	Africa	Sub-Saharan Africa	Arnot power station	Unit 1			370	operating	1972	2026	subcritical	bituminous					Eskom Holdings SOC [100%]	Eskom Holdings SOC [100.0%]	-25.9438	29.792	exact	Rietkuil		Nkangala	Mpumalanga	https://www.gem.wiki/Arnot_power_station	L100000103438	G100000100348	ZAG000066697	1	7056		52	2012	2052	2092	2.05e+06	1.86869e+06	1.84649e+06	1.7277e+06	1.87322e+06	1.87322e+06	1.87322e+06	1.87322e+06	1.87322e+06	1.87322e+06	1.87322e+06	1.87322e+06
coal	South Africa	Africa	Sub-Saharan Africa	Arnot power station	Unit 2			390	operating	1971	2026	subcritical	bituminous					Eskom Holdings SOC [100%]	Eskom Holdings SOC [100.0%]	-25.9438	29.792	exact	Rietkuil		Nkangala	Mpumalanga	https://www.gem.wiki/Arnot_power_station	L100000103438	G100000100349	ZAG000066697	1	7056		53	2011	2051	2091	2.16081e+06	1.9697e+06	1.9463e+06	1.82108e+06	1.95882e+06	1.95882e+06	1.95882e+06	1.95882e+06	1.95882e+06	1.95882e+06	1.95882e+06	1.95882e+06
coal	South Africa	Africa	Sub-Saharan Africa	Arnot power station	Unit 3			396	operating	1971	2026	subcritical	bituminous					Eskom Holdings SOC [100%]	Eskom Holdings SOC [100.0%]	-25.9438	29.792	exact	Rietkuil		Nkangala	Mpumalanga	https://www.gem.wiki/Arnot_power_station	L100000103438	G100000100350	ZAG000066697	1	7056		53	2011	2051	2091	2.19406e+06	2e+06	1.97625e+06	1.8491e+06	1.98896e+06	1.98896e+06	1.98896e+06	1.98896e+06	1.98896e+06	1.98896e+06	1.98896e+06	1.98896e+06
coal	South Africa	Africa	Sub-Saharan Africa	Arnot power station	Unit 4			396	operating	1973	2027	subcritical	bituminous					Eskom Holdings SOC [100%]	Eskom Holdings SOC [100.0%]	-25.9438	29.792	exact	Rietkuil		Nkangala	Mpumalanga	https://www.gem.wiki/Arnot_power_station	L100000103438	G100000100351	ZAG000066697	1	7056		51	2013	2053	2093	2.19406e+06	2e+06	1.97625e+06	1.8491e+06	1.98896e+06	1.98896e+06	1.98896e+06	1.98896e+06	1.98896e+06	1.98896e+06	1.98896e+06	1.98896e+06
coal	South Africa	Africa	Sub-Saharan Africa	Arnot power station	Unit 5			400	operating	1974	2029	subcritical	bituminous					Eskom Holdings SOC [100%]	Eskom Holdings SOC [100.0%]	-25.9438	29.792	exact	Rietkuil		Nkangala	Mpumalanga	https://www.gem.wiki/Arnot_power_station	L100000103438	G100000100352	ZAG000066697	1	7056		50	2014	2054	2094	2.21622e+06	2.0202e+06	1.99621e+06	1.86778e+06	2.00905e+06	2.00905e+06	2.00905e+06	2.00905e+06	2.00905e+06	2.00905e+06	2.00905e+06	2.00905e+06
coal	South Africa	Africa	Sub-Saharan Africa	Arnot power station	Unit 6			400	operating	1975	2029	subcritical	bituminous					Eskom Holdings SOC [100%]	Eskom Holdings SOC [100.0%]	-25.9438	29.792	exact	Rietkuil		Nkangala	Mpumalanga	https://www.gem.wiki/Arnot_power_station	L100000103438	G100000100353	ZAG000066697	1	7056	7056	49	2015	2055	2095	2.21622e+06	2.0202e+06	1.99621e+06	1.86778e+06	2.00905e+06	2.00905e+06	2.00905e+06	2.00905e+06	2.00905e+06	2.00905e+06	2.00905e+06	2.00905e+06
coal	South Africa	Africa	Sub-Saharan Africa	Camden power station	Unit 1			200	operating	1968	2025	subcritical	bituminous					Eskom Holdings SOC [100%]	Eskom Holdings SOC [100.0%]	-26.6215	30.0901	exact	Camden		Gert Sibande	Mpumalanga	https://www.gem.wiki/Camden_power_station	L100000103439	G100000101168	ZAG000066697	1	4800		56	2008	2048	2088	1.10811e+06	1.0101e+06	998104	933889	1.00452e+06	1.00452e+06	1.00452e+06	1.00452e+06	1.00452e+06	1.00452e+06	1.00452e+06	1.00452e+06
coal	South Africa	Africa	Sub-Saharan Africa	Camden power station	Unit 2			200	operating	1967	2025	subcritical	bituminous					Eskom Holdings SOC [100%]	Eskom Holdings SOC [100.0%]	-26.6215	30.0901	exact	Camden		Gert Sibande	Mpumalanga	https://www.gem.wiki/Camden_power_station	L100000103439	G100000101169	ZAG000066697	1	4800		57	2007	2047	2087	1.10811e+06	1.0101e+06	998104	933889	1.00452e+06	1.00452e+06	1.00452e+06	1.00452e+06	1.00452e+06	1.00452e+06	1.00452e+06	1.00452e+06
coal	South Africa	Africa	Sub-Saharan Africa	Camden power station	Unit 3			200	operating	1967	2025	subcritical	bituminous					Eskom Holdings SOC [100%]	Eskom Holdings SOC [100.0%]	-26.6215	30.0901	exact	Camden		Gert Sibande	Mpumalanga	https://www.gem.wiki/Camden_power_station	L100000103439	G100000101170	ZAG000066697	1	4800		57	2007	2047	2087	1.10811e+06	1.0101e+06	998104	933889	1.00452e+06	1.00452e+06	1.00452e+06	1.00452e+06	1.00452e+06	1.00452e+06	1.00452e+06	1.00452e+06
coal	South Africa	Africa	Sub-Saharan Africa	Camden power station	Unit 4			200	operating	1967	2025	subcritical	bituminous					Eskom Holdings SOC [100%]	Eskom Holdings SOC [100.0%]	-26.6215	30.0901	exact	Camden		Gert Sibande	Mpumalanga	https://www.gem.wiki/Camden_power_station	L100000103439	G100000101171	ZAG000066697	1	4800		57	2007	2047	2087	1.10811e+06	1.0101e+06	998104	933889	1.00452e+06	1.00452e+06	1.00452e+06	1.00452e+06	1.00452e+06	1.00452e+06	1.00452e+06	1.00452e+06
coal	South Africa	Africa	Sub-Saharan Africa	Camden power station	Unit 5			200	operating	1967	2025	subcritical	bituminous					Eskom Holdings SOC [100%]	Eskom Holdings SOC [100.0%]	-26.6215	30.0901	exact	Camden		Gert Sibande	Mpumalanga	https://www.gem.wiki/Camden_power_station	L100000103439	G100000101172	ZAG000066697	1	4800		57	2007	2047	2087	1.10811e+06	1.0101e+06	998104	933889	1.00452e+06	1.00452e+06	1.00452e+06	1.00452e+06	1.00452e+06	1.00452e+06	1.00452e+06	1.00452e+06
coal	South Africa	Africa	Sub-Saharan Africa	Camden power station	Unit 6			200	operating	1968	2025	subcritical	bituminous					Eskom Holdings SOC [100%]	Eskom Holdings SOC [100.0%]	-26.6215	30.0901	exact	Camden		Gert Sibande	Mpumalanga	https://www.gem.wiki/Camden_power_station	L100000103439	G100000101173	ZAG000066697	1	4800		56	2008	2048	2088	1.10811e+06	1.0101e+06	998104	933889	1.00452e+06	1.00452e+06	1.00452e+06	1.00452e+06	1.00452e+06	1.00452e+06	1.00452e+06	1.00452e+06
coal	South Africa	Africa	Sub-Saharan Africa	Camden power station	Unit 7			200	operating	1969	2025	subcritical	bituminous					Eskom Holdings SOC [100%]	Eskom Holdings SOC [100.0%]	-26.6215	30.0901	exact	Camden		Gert Sibande	Mpumalanga	https://www.gem.wiki/Camden_power_station	L100000103439	G100000101174	ZAG000066697	1	4800		55	2009	2049	2089	1.10811e+06	1.0101e+06	998104	933889	1.00452e+06	1.00452e+06	1.00452e+06	1.00452e+06	1.00452e+06	1.00452e+06	1.00452e+06	1.00452e+06
coal	South Africa	Africa	Sub-Saharan Africa	Camden power station	Unit 8			200	operating	1969	2025	subcritical	bituminous					Eskom Holdings SOC [100%]	Eskom Holdings SOC [100.0%]	-26.6215	30.0901	exact	Camden		Gert Sibande	Mpumalanga	https://www.gem.wiki/Camden_power_station	L100000103439	G100000101175	ZAG000066697	1	4800	4800	55	2009	2049	2089	1.10811e+06	1.0101e+06	998104	933889	1.00452e+06	1.00452e+06	1.00452e+06	1.00452e+06	1.00452e+06	1.00452e+06	1.00452e+06	1.00452e+06
coal	South Africa	Africa	Sub-Saharan Africa	Duvha power station	Unit 1			600	operating	1980	2031	subcritical	bituminous					Eskom Holdings SOC [100%]	Eskom Holdings SOC [100.0%]	-25.9613	29.3397	exact	Witbank		Nkangala	Mpumalanga	https://www.gem.wiki/Duvha_power_station	L100000103440	G100000102524	ZAG000066697	1	10800		44	2020	2060	2100	3.32433e+06	3.0303e+06	2.99431e+06	2.80167e+06	3.01357e+06	3.01357e+06	3.01357e+06	3.01357e+06	3.01357e+06	3.01357e+06	3.01357e+06	3.01357e+06
coal	South Africa	Africa	Sub-Saharan Africa	Duvha power station	Unit 2			600	operating	1980	2031	subcritical	bituminous					Eskom Holdings SOC [100%]	Eskom Holdings SOC [100.0%]	-25.9613	29.3397	exact	Witbank		Nkangala	Mpumalanga	https://www.gem.wiki/Duvha_power_station	L100000103440	G100000102525	ZAG000066697	1	10800		44	2020	2060	2100	3.32433e+06	3.0303e+06	2.99431e+06	2.80167e+06	3.01357e+06	3.01357e+06	3.01357e+06	3.01357e+06	3.01357e+06	3.01357e+06	3.01357e+06	3.01357e+06
coal	South Africa	Africa	Sub-Saharan Africa	Duvha power station	Unit 3			600	mothballed	1981	2032	subcritical	bituminous					Eskom Holdings SOC [100%]	Eskom Holdings SOC [100.0%]	-25.9613	29.3397	exact	Witbank		Nkangala	Mpumalanga	https://www.gem.wiki/Duvha_power_station	L100000103440	G100000102526	ZAG000066697	1	10800		43	2021	2061	2101	0	0	0	0	0	0	0	0	0	0	0	0
coal	South Africa	Africa	Sub-Saharan Africa	Duvha power station	Unit 4			600	operating	1982	2033	subcritical	bituminous					Eskom Holdings SOC [100%]	Eskom Holdings SOC [100.0%]	-25.9613	29.3397	exact	Witbank		Nkangala	Mpumalanga	https://www.gem.wiki/Duvha_power_station	L100000103440	G100000102527	ZAG000066697	1	10800		42	2022	2062	2102	3.32433e+06	3.0303e+06	2.99431e+06	2.80167e+06	3.01357e+06	3.01357e+06	3.01357e+06	3.01357e+06	3.01357e+06	3.01357e+06	3.01357e+06	3.01357e+06
coal	South Africa	Africa	Sub-Saharan Africa	Duvha power station	Unit 5			600	operating	1983	2033	subcritical	bituminous					Eskom Holdings SOC [100%]	Eskom Holdings SOC [100.0%]	-25.9613	29.3397	exact	Witbank		Nkangala	Mpumalanga	https://www.gem.wiki/Duvha_power_station	L100000103440	G100000102528	ZAG000066697	1	10800		41	2023	2063	2103	3.32433e+06	3.0303e+06	2.99431e+06	2.80167e+06	3.01357e+06	3.01357e+06	3.01357e+06	3.01357e+06	3.01357e+06	3.01357e+06	3.01357e+06	3.01357e+06
coal	South Africa	Africa	Sub-Saharan Africa	Duvha power station	Unit 6			600	operating	1984	2034	subcritical	bituminous					Eskom Holdings SOC [100%]	Eskom Holdings SOC [100.0%]	-25.9613	29.3397	exact	Witbank		Nkangala	Mpumalanga	https://www.gem.wiki/Duvha_power_station	L100000103440	G100000102529	ZAG000066697	1	10800	10800	40	2024	2064	2104	3.32433e+06	3.0303e+06	2.99431e+06	2.80167e+06	3.01357e+06	3.01357e+06	3.01357e+06	3.01357e+06	3.01357e+06	3.01357e+06	3.01357e+06	3.01357e+06
coal	South Africa	Africa	Sub-Saharan Africa	Grootvlei power station	Unit 1			200	operating	1973	2027	subcritical	bituminous					Eskom Holdings SOC [100%]	Eskom Holdings SOC [100.0%]	-26.7685	28.4978	exact	Grootvlei		Gert Sibande	Mpumalanga	https://www.gem.wiki/Grootvlei_power_station	L100000103441	G100000103136	ZAG000066697	1	3570		51	2013	2053	2093	1.10811e+06	1.0101e+06	998104	933889	1.00452e+06	1.00452e+06	1.00452e+06	1.00452e+06	1.00452e+06	1.00452e+06	1.00452e+06	1.00452e+06
coal	South Africa	Africa	Sub-Saharan Africa	Grootvlei power station	Unit 2			200	operating	1970	2027	subcritical	bituminous					Eskom Holdings SOC [100%]	Eskom Holdings SOC [100.0%]	-26.7685	28.4978	exact	Grootvlei		Gert Sibande	Mpumalanga	https://www.gem.wiki/Grootvlei_power_station	L100000103441	G100000103137	ZAG000066697	1	3570		54	2010	2050	2090	1.10811e+06	1.0101e+06	998104	933889	1.00452e+06	1.00452e+06	1.00452e+06	1.00452e+06	1.00452e+06	1.00452e+06	1.00452e+06	1.00452e+06
coal	South Africa	Africa	Sub-Saharan Africa	Grootvlei power station	Unit 3			200	operating	1969	2027	subcritical	bituminous					Eskom Holdings SOC [100%]	Eskom Holdings SOC [100.0%]	-26.7685	28.4978	exact	Grootvlei		Gert Sibande	Mpumalanga	https://www.gem.wiki/Grootvlei_power_station	L100000103441	G100000103138	ZAG000066697	1	3570		55	2009	2049	2089	1.10811e+06	1.0101e+06	998104	933889	1.00452e+06	1.00452e+06	1.00452e+06	1.00452e+06	1.00452e+06	1.00452e+06	1.00452e+06	1.00452e+06
coal	South Africa	Africa	Sub-Saharan Africa	Grootvlei power station	Unit 4			200	mothballed	1969	2025	subcritical	bituminous					Eskom Holdings SOC [100%]	Eskom Holdings SOC [100.0%]	-26.7685	28.4978	exact	Grootvlei		Gert Sibande	Mpumalanga	https://www.gem.wiki/Grootvlei_power_station	L100000103441	G100000103139	ZAG000066697	1	3570		55	2009	2049	2089	0	0	0	0	0	0	0	0	0	0	0	0
coal	South Africa	Africa	Sub-Saharan Africa	Grootvlei power station	Unit 5			190	mothballed	1971	2025	subcritical	bituminous					Eskom Holdings SOC [100%]	Eskom Holdings SOC [100.0%]	-26.7685	28.4978	exact	Grootvlei		Gert Sibande	Mpumalanga	https://www.gem.wiki/Grootvlei_power_station	L100000103441	G100000103140	ZAG000066697	1	3570		53	2011	2051	2091	0	0	0	0	0	0	0	0	0	0	0	0
coal	South Africa	Africa	Sub-Saharan Africa	Grootvlei power station	Unit 6			200	mothballed	1977	2025	subcritical	bituminous					Eskom Holdings SOC [100%]	Eskom Holdings SOC [100.0%]	-26.7685	28.4978	exact	Grootvlei		Gert Sibande	Mpumalanga	https://www.gem.wiki/Grootvlei_power_station	L100000103441	G100000103141	ZAG000066697	1	3570	3570	47	2017	2057	2097	0	0	0	0	0	0	0	0	0	0	0	0
coal	South Africa	Africa	Sub-Saharan Africa	Hendrina power station	Unit 1			200	mothballed	1972	2025	subcritical	bituminous					Eskom Holdings SOC [100%]	Eskom Holdings SOC [100.0%]	-26.032	29.6016	exact	Pullens Hope		Nkangala	Mpumalanga	https://www.gem.wiki/Hendrina_power_station	L100000103442	G100000103806	ZAG000066697	1	6000		52	2012	2052	2092	0	0	0	0	0	0	0	0	0	0	0	0
coal	South Africa	Africa	Sub-Saharan Africa	Hendrina power station	Unit 10			200	operating	1977	2025	subcritical	bituminous					Eskom Holdings SOC [100%]	Eskom Holdings SOC [100.0%]	-26.032	29.6016	exact	Pullens Hope		Nkangala	Mpumalanga	https://www.gem.wiki/Hendrina_power_station	L100000103442	G100000103807	ZAG000066697	1	6000		47	2017	2057	2097	1.10811e+06	1.0101e+06	998104	933889	1.00452e+06	1.00452e+06	1.00452e+06	1.00452e+06	1.00452e+06	1.00452e+06	1.00452e+06	1.00452e+06
coal	South Africa	Africa	Sub-Saharan Africa	Hendrina power station	Unit 2			200	operating	1971	2025	subcritical	bituminous					Eskom Holdings SOC [100%]	Eskom Holdings SOC [100.0%]	-26.032	29.6016	exact	Pullens Hope		Nkangala	Mpumalanga	https://www.gem.wiki/Hendrina_power_station	L100000103442	G100000103808	ZAG000066697	1	6000		53	2011	2051	2091	1.10811e+06	1.0101e+06	998104	933889	1.00452e+06	1.00452e+06	1.00452e+06	1.00452e+06	1.00452e+06	1.00452e+06	1.00452e+06	1.00452e+06
coal	South Africa	Africa	Sub-Saharan Africa	Hendrina power station	Unit 3			200	mothballed	1970	2025	subcritical	bituminous					Eskom Holdings SOC [100%]	Eskom Holdings SOC [100.0%]	-26.032	29.6016	exact	Pullens Hope		Nkangala	Mpumalanga	https://www.gem.wiki/Hendrina_power_station	L100000103442	G100000103809	ZAG000066697	1	6000		54	2010	2050	2090	0	0	0	0	0	0	0	0	0	0	0	0
coal	South Africa	Africa	Sub-Saharan Africa	Hendrina power station	Unit 4			200	operating	1970	2025	subcritical	bituminous					Eskom Holdings SOC [100%]	Eskom Holdings SOC [100.0%]	-26.032	29.6016	exact	Pullens Hope		Nkangala	Mpumalanga	https://www.gem.wiki/Hendrina_power_station	L100000103442	G100000103810	ZAG000066697	1	6000		54	2010	2050	2090	1.10811e+06	1.0101e+06	998104	933889	1.00452e+06	1.00452e+06	1.00452e+06	1.00452e+06	1.00452e+06	1.00452e+06	1.00452e+06	1.00452e+06
coal	South Africa	Africa	Sub-Saharan Africa	Hendrina power station	Unit 5			200	operating	1971	2025	subcritical	bituminous					Eskom Holdings SOC [100%]	Eskom Holdings SOC [100.0%]	-26.032	29.6016	exact	Pullens Hope		Nkangala	Mpumalanga	https://www.gem.wiki/Hendrina_power_station	L100000103442	G100000103811	ZAG000066697	1	6000		53	2011	2051	2091	1.10811e+06	1.0101e+06	998104	933889	1.00452e+06	1.00452e+06	1.00452e+06	1.00452e+06	1.00452e+06	1.00452e+06	1.00452e+06	1.00452e+06
coal	South Africa	Africa	Sub-Saharan Africa	Hendrina power station	Unit 6			200	operating	1973	2025	subcritical	bituminous					Eskom Holdings SOC [100%]	Eskom Holdings SOC [100.0%]	-26.032	29.6016	exact	Pullens Hope		Nkangala	Mpumalanga	https://www.gem.wiki/Hendrina_power_station	L100000103442	G100000103812	ZAG000066697	1	6000		51	2013	2053	2093	1.10811e+06	1.0101e+06	998104	933889	1.00452e+06	1.00452e+06	1.00452e+06	1.00452e+06	1.00452e+06	1.00452e+06	1.00452e+06	1.00452e+06
coal	South Africa	Africa	Sub-Saharan Africa	Hendrina power station	Unit 7			200	operating	1974	2025	subcritical	bituminous					Eskom Holdings SOC [100%]	Eskom Holdings SOC [100.0%]	-26.032	29.6016	exact	Pullens Hope		Nkangala	Mpumalanga	https://www.gem.wiki/Hendrina_power_station	L100000103442	G100000103813	ZAG000066697	1	6000		50	2014	2054	2094	1.10811e+06	1.0101e+06	998104	933889	1.00452e+06	1.00452e+06	1.00452e+06	1.00452e+06	1.00452e+06	1.00452e+06	1.00452e+06	1.00452e+06
coal	South Africa	Africa	Sub-Saharan Africa	Hendrina power station	Unit 8			200	operating	1975	2025	subcritical	bituminous					Eskom Holdings SOC [100%]	Eskom Holdings SOC [100.0%]	-26.032	29.6016	exact	Pullens Hope		Nkangala	Mpumalanga	https://www.gem.wiki/Hendrina_power_station	L100000103442	G100000103814	ZAG000066697	1	6000		49	2015	2055	2095	1.10811e+06	1.0101e+06	998104	933889	1.00452e+06	1.00452e+06	1.00452e+06	1.00452e+06	1.00452e+06	1.00452e+06	1.00452e+06	1.00452e+06
coal	South Africa	Africa	Sub-Saharan Africa	Hendrina power station	Unit 9			200	mothballed	1976	2025	subcritical	bituminous					Eskom Holdings SOC [100%]	Eskom Holdings SOC [100.0%]	-26.032	29.6016	exact	Pullens Hope		Nkangala	Mpumalanga	https://www.gem.wiki/Hendrina_power_station	L100000103442	G100000103815	ZAG000066697	1	6000	6000	48	2016	2056	2096	0	0	0	0	0	0	0	0	0	0	0	0
coal	South Africa	Africa	Sub-Saharan Africa	Kendal power station	Unit 1			686	operating	1988	2038	subcritical	bituminous					Eskom Holdings SOC [100%]	Eskom Holdings SOC [100.0%]	-26.0903	28.9688	exact	Kendal		Nkangala	Mpumalanga	https://www.gem.wiki/Kendal_power_station	L100000103443	G100000105663	ZAG000066697	1	12348		36	2028	2068	2108	3.80081e+06	3.46464e+06	3.4235e+06	3.20324e+06	3.44552e+06	3.44552e+06	3.44552e+06	3.44552e+06	3.44552e+06	3.44552e+06	3.44552e+06	3.44552e+06
coal	South Africa	Africa	Sub-Saharan Africa	Kendal power station	Unit 2			686	operating	1989	2039	subcritical	bituminous					Eskom Holdings SOC [100%]	Eskom Holdings SOC [100.0%]	-26.0903	28.9688	exact	Kendal		Nkangala	Mpumalanga	https://www.gem.wiki/Kendal_power_station	L100000103443	G100000105664	ZAG000066697	1	12348		35	2029	2069	2109	3.80081e+06	3.46464e+06	3.4235e+06	3.20324e+06	3.44552e+06	3.44552e+06	3.44552e+06	3.44552e+06	3.44552e+06	3.44552e+06	3.44552e+06	3.44552e+06
coal	South Africa	Africa	Sub-Saharan Africa	Kendal power station	Unit 3			686	operating	1990	2040	subcritical	bituminous					Eskom Holdings SOC [100%]	Eskom Holdings SOC [100.0%]	-26.0903	28.9688	exact	Kendal		Nkangala	Mpumalanga	https://www.gem.wiki/Kendal_power_station	L100000103443	G100000105665	ZAG000066697	1	12348		34	2030	2070	2110	3.80081e+06	3.46464e+06	3.4235e+06	3.20324e+06	3.44552e+06	3.44552e+06	3.44552e+06	3.44552e+06	3.44552e+06	3.44552e+06	3.44552e+06	3.44552e+06
coal	South Africa	Africa	Sub-Saharan Africa	Kendal power station	Unit 4			686	operating	1991	2041	subcritical	bituminous					Eskom Holdings SOC [100%]	Eskom Holdings SOC [100.0%]	-26.0903	28.9688	exact	Kendal		Nkangala	Mpumalanga	https://www.gem.wiki/Kendal_power_station	L100000103443	G100000105666	ZAG000066697	1	12348		33	2031	2071	2111	3.80081e+06	3.46464e+06	3.4235e+06	3.20324e+06	3.44552e+06	3.44552e+06	3.44552e+06	3.44552e+06	3.44552e+06	3.44552e+06	3.44552e+06	3.44552e+06
coal	South Africa	Africa	Sub-Saharan Africa	Kendal power station	Unit 5			686	operating	1992	2042	subcritical	bituminous					Eskom Holdings SOC [100%]	Eskom Holdings SOC [100.0%]	-26.0903	28.9688	exact	Kendal		Nkangala	Mpumalanga	https://www.gem.wiki/Kendal_power_station	L100000103443	G100000105667	ZAG000066697	1	12348		32	2032	2072	2112	3.80081e+06	3.46464e+06	3.4235e+06	3.20324e+06	3.44552e+06	3.44552e+06	3.44552e+06	3.44552e+06	3.44552e+06	3.44552e+06	3.44552e+06	3.44552e+06
coal	South Africa	Africa	Sub-Saharan Africa	Kendal power station	Unit 6			686	operating	1993	2043	subcritical	bituminous					Eskom Holdings SOC [100%]	Eskom Holdings SOC [100.0%]	-26.0903	28.9688	exact	Kendal		Nkangala	Mpumalanga	https://www.gem.wiki/Kendal_power_station	L100000103443	G100000105668	ZAG000066697	1	12348	12348	31	2033	2073	2113	3.80081e+06	3.46464e+06	3.4235e+06	3.20324e+06	3.44552e+06	3.44552e+06	3.44552e+06	3.44552e+06	3.44552e+06	3.44552e+06	3.44552e+06	3.44552e+06
coal	South Africa	Africa	Sub-Saharan Africa	Komati power station	Unit 1			100	retired	1961	2022	subcritical	bituminous					Eskom Holdings SOC [100%]	Eskom Holdings SOC [100.0%]	-26.0908	29.4745	exact	Middleburg			Mpumalanga	https://www.gem.wiki/Komati_power_station	L100000103446	G100000105828	ZAG000066697	1	3000		63	2001	2041	2081	554054	505050	0	0	0	0	0	0	0	0	0	0
coal	South Africa	Africa	Sub-Saharan Africa	Komati power station	Unit 2			100	retired	1962	2022	subcritical	bituminous					Eskom Holdings SOC [100%]	Eskom Holdings SOC [100.0%]	-26.0908	29.4745	exact	Middleburg			Mpumalanga	https://www.gem.wiki/Komati_power_station	L100000103446	G100000105829	ZAG000066697	1	3000		62	2002	2042	2082	554054	505050	0	0	0	0	0	0	0	0	0	0
coal	South Africa	Africa	Sub-Saharan Africa	Komati power station	Unit 3			100	retired	1962	2022	subcritical	bituminous					Eskom Holdings SOC [100%]	Eskom Holdings SOC [100.0%]	-26.0908	29.4745	exact	Middleburg			Mpumalanga	https://www.gem.wiki/Komati_power_station	L100000103446	G100000105830	ZAG000066697	1	3000		62	2002	2042	2082	554054	505050	0	0	0	0	0	0	0	0	0	0
coal	South Africa	Africa	Sub-Saharan Africa	Komati power station	Unit 4			100	retired	1963	2022	subcritical	bituminous					Eskom Holdings SOC [100%]	Eskom Holdings SOC [100.0%]	-26.0908	29.4745	exact	Middleburg			Mpumalanga	https://www.gem.wiki/Komati_power_station	L100000103446	G100000105831	ZAG000066697	1	3000		61	2003	2043	2083	554054	505050	0	0	0	0	0	0	0	0	0	0
coal	South Africa	Africa	Sub-Saharan Africa	Komati power station	Unit 5			100	retired	1963	2022	subcritical	bituminous					Eskom Holdings SOC [100%]	Eskom Holdings SOC [100.0%]	-26.0908	29.4745	exact	Middleburg			Mpumalanga	https://www.gem.wiki/Komati_power_station	L100000103446	G100000105832	ZAG000066697	1	3000		61	2003	2043	2083	554054	505050	0	0	0	0	0	0	0	0	0	0
coal	South Africa	Africa	Sub-Saharan Africa	Komati power station	Unit 6			125	retired	1964	2022	subcritical	bituminous					Eskom Holdings SOC [100%]	Eskom Holdings SOC [100.0%]	-26.0908	29.4745	exact	Middleburg			Mpumalanga	https://www.gem.wiki/Komati_power_station	L100000103446	G100000105833	ZAG000066697	1	3000		60	2004	2044	2084	692568	631313	0	0	0	0	0	0	0	0	0	0
coal	South Africa	Africa	Sub-Saharan Africa	Komati power station	Unit 7			125	retired	1964	2022	subcritical	bituminous					Eskom Holdings SOC [100%]	Eskom Holdings SOC [100.0%]	-26.0908	29.4745	exact	Middleburg			Mpumalanga	https://www.gem.wiki/Komati_power_station	L100000103446	G100000105834	ZAG000066697	1	3000		60	2004	2044	2084	692568	631313	0	0	0	0	0	0	0	0	0	0
coal	South Africa	Africa	Sub-Saharan Africa	Komati power station	Unit 8			125	retired	1964	2022	subcritical	bituminous					Eskom Holdings SOC [100%]	Eskom Holdings SOC [100.0%]	-26.0908	29.4745	exact	Middleburg			Mpumalanga	https://www.gem.wiki/Komati_power_station	L100000103446	G100000105835	ZAG000066697	1	3000		60	2004	2044	2084	692568	631313	0	0	0	0	0	0	0	0	0	0
coal	South Africa	Africa	Sub-Saharan Africa	Komati power station	Unit 9			125	retired	1964	2022	subcritical	bituminous					Eskom Holdings SOC [100%]	Eskom Holdings SOC [100.0%]	-26.0908	29.4745	exact	Middleburg			Mpumalanga	https://www.gem.wiki/Komati_power_station	L100000103446	G100000105836	ZAG000066697	1	3000	3000	60	2004	2044	2084	692568	631313	0	0	0	0	0	0	0	0	0	0
coal	South Africa	Africa	Sub-Saharan Africa	Kriel power station	Unit 1			500	operating	1976	2026	subcritical	bituminous					Eskom Holdings SOC [100%]	Eskom Holdings SOC [100.0%]	-26.2539	29.1785	exact	Kriel		Nkangala	Mpumalanga	https://www.gem.wiki/Kriel_power_station	L100000103447	G100000105964	ZAG000066697	1	9000		48	2016	2056	2096	2.77027e+06	2.52525e+06	2.49526e+06	2.33472e+06	2.51131e+06	2.51131e+06	2.51131e+06	2.51131e+06	2.51131e+06	2.51131e+06	2.51131e+06	2.51131e+06
coal	South Africa	Africa	Sub-Saharan Africa	Kriel power station	Unit 2			500	operating	1976	2027	subcritical	bituminous					Eskom Holdings SOC [100%]	Eskom Holdings SOC [100.0%]	-26.2539	29.1785	exact	Kriel		Nkangala	Mpumalanga	https://www.gem.wiki/Kriel_power_station	L100000103447	G100000105965	ZAG000066697	1	9000		48	2016	2056	2096	2.77027e+06	2.52525e+06	2.49526e+06	2.33472e+06	2.51131e+06	2.51131e+06	2.51131e+06	2.51131e+06	2.51131e+06	2.51131e+06	2.51131e+06	2.51131e+06
coal	South Africa	Africa	Sub-Saharan Africa	Kriel power station	Unit 3			500	operating	1977	2028	subcritical	bituminous					Eskom Holdings SOC [100%]	Eskom Holdings SOC [100.0%]	-26.2539	29.1785	exact	Kriel		Nkangala	Mpumalanga	https://www.gem.wiki/Kriel_power_station	L100000103447	G100000105966	ZAG000066697	1	9000		47	2017	2057	2097	2.77027e+06	2.52525e+06	2.49526e+06	2.33472e+06	2.51131e+06	2.51131e+06	2.51131e+06	2.51131e+06	2.51131e+06	2.51131e+06	2.51131e+06	2.51131e+06
coal	South Africa	Africa	Sub-Saharan Africa	Kriel power station	Unit 4			500	operating	1978	2029	subcritical	bituminous					Eskom Holdings SOC [100%]	Eskom Holdings SOC [100.0%]	-26.2539	29.1785	exact	Kriel		Nkangala	Mpumalanga	https://www.gem.wiki/Kriel_power_station	L100000103447	G100000105967	ZAG000066697	1	9000		46	2018	2058	2098	2.77027e+06	2.52525e+06	2.49526e+06	2.33472e+06	2.51131e+06	2.51131e+06	2.51131e+06	2.51131e+06	2.51131e+06	2.51131e+06	2.51131e+06	2.51131e+06
coal	South Africa	Africa	Sub-Saharan Africa	Kriel power station	Unit 5			500	operating	1979	2029	subcritical	bituminous					Eskom Holdings SOC [100%]	Eskom Holdings SOC [100.0%]	-26.2539	29.1785	exact	Kriel		Nkangala	Mpumalanga	https://www.gem.wiki/Kriel_power_station	L100000103447	G100000105968	ZAG000066697	1	9000		45	2019	2059	2099	2.77027e+06	2.52525e+06	2.49526e+06	2.33472e+06	2.51131e+06	2.51131e+06	2.51131e+06	2.51131e+06	2.51131e+06	2.51131e+06	2.51131e+06	2.51131e+06
coal	South Africa	Africa	Sub-Saharan Africa	Kriel power station	Unit 6			500	operating	1979	2030	subcritical	bituminous					Eskom Holdings SOC [100%]	Eskom Holdings SOC [100.0%]	-26.2539	29.1785	exact	Kriel		Nkangala	Mpumalanga	https://www.gem.wiki/Kriel_power_station	L100000103447	G100000105969	ZAG000066697	1	9000	9000	45	2019	2059	2099	2.77027e+06	2.52525e+06	2.49526e+06	2.33472e+06	2.51131e+06	2.51131e+06	2.51131e+06	2.51131e+06	2.51131e+06	2.51131e+06	2.51131e+06	2.51131e+06
coal	South Africa	Africa	Sub-Saharan Africa	Kusile power station	Unit 1			800	operating	2018	2069	supercritical	bituminous					Eskom Holdings SOC [100%]	Eskom Holdings SOC [100.0%]	-25.9201	28.9249	exact	Witbank			Mpumalanga	https://www.gem.wiki/Kusile_power_station	L100000103448	G100000106039	ZAG000066697	1	14400		6	2058	2098	2138	4.43243e+06	4.0404e+06	3.99242e+06	3.73556e+06	4.01809e+06	4.01809e+06	4.01809e+06	4.01809e+06	4.01809e+06	4.01809e+06	4.01809e+06	4.01809e+06
coal	South Africa	Africa	Sub-Saharan Africa	Kusile power station	Unit 2			800	operating	2020	2070	supercritical	bituminous					Eskom Holdings SOC [100%]	Eskom Holdings SOC [100.0%]	-25.9201	28.9249	exact	Witbank			Mpumalanga	https://www.gem.wiki/Kusile_power_station	L100000103448	G100000106040	ZAG000066697	1	14400		4	2060	2100	2140	4.43243e+06	4.0404e+06	3.99242e+06	3.73556e+06	4.01809e+06	4.01809e+06	4.01809e+06	4.01809e+06	4.01809e+06	4.01809e+06	4.01809e+06	4.01809e+06
coal	South Africa	Africa	Sub-Saharan Africa	Kusile power station	Unit 3			800	operating	2021	2071	supercritical	bituminous					Eskom Holdings SOC [100%]	Eskom Holdings SOC [100.0%]	-25.9201	28.9249	exact	Witbank			Mpumalanga	https://www.gem.wiki/Kusile_power_station	L100000103448	G100000106041	ZAG000066697	1	14400		3	2061	2101	2141	0	4.0404e+06	3.99242e+06	3.73556e+06	4.01809e+06	4.01809e+06	4.01809e+06	4.01809e+06	4.01809e+06	4.01809e+06	4.01809e+06	4.01809e+06
coal	South Africa	Africa	Sub-Saharan Africa	Kusile power station	Unit 4			800	operating	2022		supercritical	bituminous					Eskom Holdings SOC [100%]	Eskom Holdings SOC [100.0%]	-25.9201	28.9249	exact	Witbank			Mpumalanga	https://www.gem.wiki/Kusile_power_station	L100000103448	G100000106042	ZAG000066697	1	14400		2	2062	2102	2142	0	0	3.99242e+06	3.73556e+06	4.01809e+06	4.01809e+06	4.01809e+06	4.01809e+06	4.01809e+06	4.01809e+06	4.01809e+06	4.01809e+06
coal	South Africa	Africa	Sub-Saharan Africa	Kusile power station	Unit 5			800	construction	2024		supercritical	bituminous					Eskom Holdings SOC [100%]	Eskom Holdings SOC [100.0%]	-25.9201	28.9249	exact	Witbank			Mpumalanga	https://www.gem.wiki/Kusile_power_station	L100000103448	G100000106043	ZAG000066697	1	14400		0	2064	2104	2144	0	0	0	0	4.01809e+06	4.01809e+06	4.01809e+06	4.01809e+06	4.01809e+06	4.01809e+06	4.01809e+06	4.01809e+06
coal	South Africa	Africa	Sub-Saharan Africa	Kusile power station	Unit 6			800	construction	2025		supercritical	bituminous					Eskom Holdings SOC [100%]	Eskom Holdings SOC [100.0%]	-25.9201	28.9249	exact	Witbank			Mpumalanga	https://www.gem.wiki/Kusile_power_station	L100000103448	G100000106044	ZAG000066697	1	14400	14400	-1	2065	2105	2145	0	0	0	0	0	4.01809e+06	4.01809e+06	4.01809e+06	4.01809e+06	4.01809e+06	4.01809e+06	4.01809e+06
coal	South Africa	Africa	Sub-Saharan Africa	Lethabo power station	Unit 1			618	operating	1985	2035	subcritical	bituminous					Eskom Holdings SOC [100%]	Eskom Holdings SOC [100.0%]	-26.742	27.9769	exact	Viljoensdrif		Fezile Dabi	Free State	https://www.gem.wiki/Lethabo_power_station	L100000103423	G100000106240	ZAG000066697	1	11124		39	2025	2065	2105	3.42406e+06	3.12121e+06	3.08414e+06	2.88572e+06	3.10398e+06	3.10398e+06	3.10398e+06	3.10398e+06	3.10398e+06	3.10398e+06	3.10398e+06	3.10398e+06
coal	South Africa	Africa	Sub-Saharan Africa	Lethabo power station	Unit 2			618	operating	1986	2036	subcritical	bituminous					Eskom Holdings SOC [100%]	Eskom Holdings SOC [100.0%]	-26.742	27.9769	exact	Viljoensdrif		Fezile Dabi	Free State	https://www.gem.wiki/Lethabo_power_station	L100000103423	G100000106241	ZAG000066697	1	11124		38	2026	2066	2106	3.42406e+06	3.12121e+06	3.08414e+06	2.88572e+06	3.10398e+06	3.10398e+06	3.10398e+06	3.10398e+06	3.10398e+06	3.10398e+06	3.10398e+06	3.10398e+06
coal	South Africa	Africa	Sub-Saharan Africa	Lethabo power station	Unit 3			618	operating	1987	2037	subcritical	bituminous					Eskom Holdings SOC [100%]	Eskom Holdings SOC [100.0%]	-26.742	27.9769	exact	Viljoensdrif		Fezile Dabi	Free State	https://www.gem.wiki/Lethabo_power_station	L100000103423	G100000106242	ZAG000066697	1	11124		37	2027	2067	2107	3.42406e+06	3.12121e+06	3.08414e+06	2.88572e+06	3.10398e+06	3.10398e+06	3.10398e+06	3.10398e+06	3.10398e+06	3.10398e+06	3.10398e+06	3.10398e+06
coal	South Africa	Africa	Sub-Saharan Africa	Lethabo power station	Unit 4			618	operating	1987	2037	subcritical	bituminous					Eskom Holdings SOC [100%]	Eskom Holdings SOC [100.0%]	-26.742	27.9769	exact	Viljoensdrif		Fezile Dabi	Free State	https://www.gem.wiki/Lethabo_power_station	L100000103423	G100000106243	ZAG000066697	1	11124		37	2027	2067	2107	3.42406e+06	3.12121e+06	3.08414e+06	2.88572e+06	3.10398e+06	3.10398e+06	3.10398e+06	3.10398e+06	3.10398e+06	3.10398e+06	3.10398e+06	3.10398e+06
coal	South Africa	Africa	Sub-Saharan Africa	Lethabo power station	Unit 5			618	operating	1989	2039	subcritical	bituminous					Eskom Holdings SOC [100%]	Eskom Holdings SOC [100.0%]	-26.742	27.9769	exact	Viljoensdrif		Fezile Dabi	Free State	https://www.gem.wiki/Lethabo_power_station	L100000103423	G100000106244	ZAG000066697	1	11124		35	2029	2069	2109	3.42406e+06	3.12121e+06	3.08414e+06	2.88572e+06	3.10398e+06	3.10398e+06	3.10398e+06	3.10398e+06	3.10398e+06	3.10398e+06	3.10398e+06	3.10398e+06
coal	South Africa	Africa	Sub-Saharan Africa	Lethabo power station	Unit 6			618	operating	1990	2040	subcritical	bituminous					Eskom Holdings SOC [100%]	Eskom Holdings SOC [100.0%]	-26.742	27.9769	exact	Viljoensdrif		Fezile Dabi	Free State	https://www.gem.wiki/Lethabo_power_station	L100000103423	G100000106245	ZAG000066697	1	11124	11124	34	2030	2070	2110	3.42406e+06	3.12121e+06	3.08414e+06	2.88572e+06	3.10398e+06	3.10398e+06	3.10398e+06	3.10398e+06	3.10398e+06	3.10398e+06	3.10398e+06	3.10398e+06
coal	South Africa	Africa	Sub-Saharan Africa	Majuba power station	Unit 1			665	operating	1996	2046	subcritical	bituminous					Eskom Holdings SOC [100%]	Eskom Holdings SOC [100.0%]	-27.1006	29.771	exact	Amersfoort		Gert Sibande	Mpumalanga	https://www.gem.wiki/Majuba_power_station	L100000103449	G100000106600	ZAG000066697	1	12429		28	2036	2076	2116	3.68446e+06	3.35858e+06	3.3187e+06	3.10518e+06	3.34004e+06	3.34004e+06	3.34004e+06	3.34004e+06	3.34004e+06	3.34004e+06	3.34004e+06	3.34004e+06
coal	South Africa	Africa	Sub-Saharan Africa	Majuba power station	Unit 2			665	operating	1997	2047	subcritical	bituminous					Eskom Holdings SOC [100%]	Eskom Holdings SOC [100.0%]	-27.1006	29.771	exact	Amersfoort		Gert Sibande	Mpumalanga	https://www.gem.wiki/Majuba_power_station	L100000103449	G100000106601	ZAG000066697	1	12429		27	2037	2077	2117	3.68446e+06	3.35858e+06	3.3187e+06	3.10518e+06	3.34004e+06	3.34004e+06	3.34004e+06	3.34004e+06	3.34004e+06	3.34004e+06	3.34004e+06	3.34004e+06
coal	South Africa	Africa	Sub-Saharan Africa	Majuba power station	Unit 3			665	operating	1998	2048	subcritical	bituminous					Eskom Holdings SOC [100%]	Eskom Holdings SOC [100.0%]	-27.1006	29.771	exact	Amersfoort		Gert Sibande	Mpumalanga	https://www.gem.wiki/Majuba_power_station	L100000103449	G100000106602	ZAG000066697	1	12429		26	2038	2078	2118	3.68446e+06	3.35858e+06	3.3187e+06	3.10518e+06	3.34004e+06	3.34004e+06	3.34004e+06	3.34004e+06	3.34004e+06	3.34004e+06	3.34004e+06	3.34004e+06
coal	South Africa	Africa	Sub-Saharan Africa	Majuba power station	Unit 4			716	operating	1999	2049	subcritical	bituminous					Eskom Holdings SOC [100%]	Eskom Holdings SOC [100.0%]	-27.1006	29.771	exact	Amersfoort		Gert Sibande	Mpumalanga	https://www.gem.wiki/Majuba_power_station	L100000103449	G100000106603	ZAG000066697	1	12429		25	2039	2079	2119	3.96703e+06	3.61616e+06	3.57321e+06	3.34332e+06	3.59619e+06	3.59619e+06	3.59619e+06	3.59619e+06	3.59619e+06	3.59619e+06	3.59619e+06	3.59619e+06
coal	South Africa	Africa	Sub-Saharan Africa	Majuba power station	Unit 5			716	operating	2000	2050	subcritical	bituminous					Eskom Holdings SOC [100%]	Eskom Holdings SOC [100.0%]	-27.1006	29.771	exact	Amersfoort		Gert Sibande	Mpumalanga	https://www.gem.wiki/Majuba_power_station	L100000103449	G100000106604	ZAG000066697	1	12429		24	2040	2080	2120	3.96703e+06	3.61616e+06	3.57321e+06	3.34332e+06	3.59619e+06	3.59619e+06	3.59619e+06	3.59619e+06	3.59619e+06	3.59619e+06	3.59619e+06	3.59619e+06
coal	South Africa	Africa	Sub-Saharan Africa	Majuba power station	Unit 6			716	operating	2001	2051	subcritical	bituminous					Eskom Holdings SOC [100%]	Eskom Holdings SOC [100.0%]	-27.1006	29.771	exact	Amersfoort		Gert Sibande	Mpumalanga	https://www.gem.wiki/Majuba_power_station	L100000103449	G100000106605	ZAG000066697	1	12429	12429	23	2041	2081	2121	3.96703e+06	3.61616e+06	3.57321e+06	3.34332e+06	3.59619e+06	3.59619e+06	3.59619e+06	3.59619e+06	3.59619e+06	3.59619e+06	3.59619e+06	3.59619e+06
coal	South Africa	Africa	Sub-Saharan Africa	Matimba power station	Unit 1			665	operating	1987	2037	subcritical	bituminous					Eskom Holdings SOC [100%]	Eskom Holdings SOC [100.0%]	-23.6688	27.6108	exact	Lephalale		Waterberg	Limpopo	https://www.gem.wiki/Matimba_power_station	L100000103431	G100000106720	ZAG000066697	1	11970		37	2027	2067	2107	3.68446e+06	3.35858e+06	3.3187e+06	3.10518e+06	3.34004e+06	3.34004e+06	3.34004e+06	3.34004e+06	3.34004e+06	3.34004e+06	3.34004e+06	3.34004e+06
coal	South Africa	Africa	Sub-Saharan Africa	Matimba power station	Unit 2			665	operating	1987	2037	subcritical	bituminous					Eskom Holdings SOC [100%]	Eskom Holdings SOC [100.0%]	-23.6688	27.6108	exact	Lephalale		Waterberg	Limpopo	https://www.gem.wiki/Matimba_power_station	L100000103431	G100000106721	ZAG000066697	1	11970		37	2027	2067	2107	3.68446e+06	3.35858e+06	3.3187e+06	3.10518e+06	3.34004e+06	3.34004e+06	3.34004e+06	3.34004e+06	3.34004e+06	3.34004e+06	3.34004e+06	3.34004e+06
coal	South Africa	Africa	Sub-Saharan Africa	Matimba power station	Unit 3			665	operating	1988	2038	subcritical	bituminous					Eskom Holdings SOC [100%]	Eskom Holdings SOC [100.0%]	-23.6688	27.6108	exact	Lephalale		Waterberg	Limpopo	https://www.gem.wiki/Matimba_power_station	L100000103431	G100000106722	ZAG000066697	1	11970		36	2028	2068	2108	3.68446e+06	3.35858e+06	3.3187e+06	3.10518e+06	3.34004e+06	3.34004e+06	3.34004e+06	3.34004e+06	3.34004e+06	3.34004e+06	3.34004e+06	3.34004e+06
coal	South Africa	Africa	Sub-Saharan Africa	Matimba power station	Unit 4			665	operating	1989	2039	subcritical	bituminous					Eskom Holdings SOC [100%]	Eskom Holdings SOC [100.0%]	-23.6688	27.6108	exact	Lephalale		Waterberg	Limpopo	https://www.gem.wiki/Matimba_power_station	L100000103431	G100000106723	ZAG000066697	1	11970		35	2029	2069	2109	3.68446e+06	3.35858e+06	3.3187e+06	3.10518e+06	3.34004e+06	3.34004e+06	3.34004e+06	3.34004e+06	3.34004e+06	3.34004e+06	3.34004e+06	3.34004e+06
coal	South Africa	Africa	Sub-Saharan Africa	Matimba power station	Unit 5			665	operating	1990	2040	subcritical	bituminous					Eskom Holdings SOC [100%]	Eskom Holdings SOC [100.0%]	-23.6688	27.6108	exact	Lephalale		Waterberg	Limpopo	https://www.gem.wiki/Matimba_power_station	L100000103431	G100000106724	ZAG000066697	1	11970		34	2030	2070	2110	3.68446e+06	3.35858e+06	3.3187e+06	3.10518e+06	3.34004e+06	3.34004e+06	3.34004e+06	3.34004e+06	3.34004e+06	3.34004e+06	3.34004e+06	3.34004e+06
coal	South Africa	Africa	Sub-Saharan Africa	Matimba power station	Unit 6			665	operating	1991	2041	subcritical	bituminous					Eskom Holdings SOC [100%]	Eskom Holdings SOC [100.0%]	-23.6688	27.6108	exact	Lephalale		Waterberg	Limpopo	https://www.gem.wiki/Matimba_power_station	L100000103431	G100000106725	ZAG000066697	1	11970	11970	33	2031	2071	2111	3.68446e+06	3.35858e+06	3.3187e+06	3.10518e+06	3.34004e+06	3.34004e+06	3.34004e+06	3.34004e+06	3.34004e+06	3.34004e+06	3.34004e+06	3.34004e+06
coal	South Africa	Africa	Sub-Saharan Africa	Matla power station	Unit 1			600	operating	1979	2030	subcritical	bituminous					Eskom Holdings SOC [100%]	Eskom Holdings SOC [100.0%]	-26.2813	29.1415	exact	Kriel		Nkangala	Mpumalanga	https://www.gem.wiki/Matla_power_station	L100000103450	G100000106726	ZAG000066697	1	10800		45	2019	2059	2099	3.32433e+06	3.0303e+06	2.99431e+06	2.80167e+06	3.01357e+06	3.01357e+06	3.01357e+06	3.01357e+06	3.01357e+06	3.01357e+06	3.01357e+06	3.01357e+06
coal	South Africa	Africa	Sub-Saharan Africa	Matla power station	Unit 2			600	operating	1980	2031	subcritical	bituminous					Eskom Holdings SOC [100%]	Eskom Holdings SOC [100.0%]	-26.2813	29.1415	exact	Kriel		Nkangala	Mpumalanga	https://www.gem.wiki/Matla_power_station	L100000103450	G100000106727	ZAG000066697	1	10800		44	2020	2060	2100	3.32433e+06	3.0303e+06	2.99431e+06	2.80167e+06	3.01357e+06	3.01357e+06	3.01357e+06	3.01357e+06	3.01357e+06	3.01357e+06	3.01357e+06	3.01357e+06
coal	South Africa	Africa	Sub-Saharan Africa	Matla power station	Unit 3			600	operating	1980	2031	subcritical	bituminous					Eskom Holdings SOC [100%]	Eskom Holdings SOC [100.0%]	-26.2813	29.1415	exact	Kriel		Nkangala	Mpumalanga	https://www.gem.wiki/Matla_power_station	L100000103450	G100000106728	ZAG000066697	1	10800		44	2020	2060	2100	3.32433e+06	3.0303e+06	2.99431e+06	2.80167e+06	3.01357e+06	3.01357e+06	3.01357e+06	3.01357e+06	3.01357e+06	3.01357e+06	3.01357e+06	3.01357e+06
coal	South Africa	Africa	Sub-Saharan Africa	Matla power station	Unit 4			600	operating	1981	2032	subcritical	bituminous					Eskom Holdings SOC [100%]	Eskom Holdings SOC [100.0%]	-26.2813	29.1415	exact	Kriel		Nkangala	Mpumalanga	https://www.gem.wiki/Matla_power_station	L100000103450	G100000106729	ZAG000066697	1	10800		43	2021	2061	2101	3.32433e+06	3.0303e+06	2.99431e+06	2.80167e+06	3.01357e+06	3.01357e+06	3.01357e+06	3.01357e+06	3.01357e+06	3.01357e+06	3.01357e+06	3.01357e+06
coal	South Africa	Africa	Sub-Saharan Africa	Matla power station	Unit 5			600	operating	1982	2033	subcritical	bituminous					Eskom Holdings SOC [100%]	Eskom Holdings SOC [100.0%]	-26.2813	29.1415	exact	Kriel		Nkangala	Mpumalanga	https://www.gem.wiki/Matla_power_station	L100000103450	G100000106730	ZAG000066697	1	10800		42	2022	2062	2102	3.32433e+06	3.0303e+06	2.99431e+06	2.80167e+06	3.01357e+06	3.01357e+06	3.01357e+06	3.01357e+06	3.01357e+06	3.01357e+06	3.01357e+06	3.01357e+06
coal	South Africa	Africa	Sub-Saharan Africa	Matla power station	Unit 6			600	operating	1983	2034	subcritical	bituminous					Eskom Holdings SOC [100%]	Eskom Holdings SOC [100.0%]	-26.2813	29.1415	exact	Kriel		Nkangala	Mpumalanga	https://www.gem.wiki/Matla_power_station	L100000103450	G100000106731	ZAG000066697	1	10800	10800	41	2023	2063	2103	3.32433e+06	3.0303e+06	2.99431e+06	2.80167e+06	3.01357e+06	3.01357e+06	3.01357e+06	3.01357e+06	3.01357e+06	3.01357e+06	3.01357e+06	3.01357e+06
coal	South Africa	Africa	Sub-Saharan Africa	Medupi power station	Unit 1			794.8	operating	2021	2071	supercritical	bituminous					Eskom Holdings SOC [100%]	Eskom Holdings SOC [100.0%]	-23.705	27.5638	exact	Lephalale			Limpopo	https://www.gem.wiki/Medupi_power_station	L100000103432	G100000106780	ZAG000066697	1	14306.4		3	2061	2101	2141	0	4.01414e+06	3.96646e+06	3.71128e+06	3.99198e+06	3.99198e+06	3.99198e+06	3.99198e+06	3.99198e+06	3.99198e+06	3.99198e+06	3.99198e+06
coal	South Africa	Africa	Sub-Saharan Africa	Medupi power station	Unit 2			794.8	operating	2019	2069	supercritical	bituminous					Eskom Holdings SOC [100%]	Eskom Holdings SOC [100.0%]	-23.705	27.5638	exact	Lephalale			Limpopo	https://www.gem.wiki/Medupi_power_station	L100000103432	G100000106781	ZAG000066697	1	14306.4		5	2059	2099	2139	4.40362e+06	4.01414e+06	3.96646e+06	3.71128e+06	3.99198e+06	3.99198e+06	3.99198e+06	3.99198e+06	3.99198e+06	3.99198e+06	3.99198e+06	3.99198e+06
coal	South Africa	Africa	Sub-Saharan Africa	Medupi power station	Unit 3			794.8	operating	2019	2068	supercritical	bituminous					Eskom Holdings SOC [100%]	Eskom Holdings SOC [100.0%]	-23.705	27.5638	exact	Lephalale			Limpopo	https://www.gem.wiki/Medupi_power_station	L100000103432	G100000106782	ZAG000066697	1	14306.4		5	2059	2099	2139	4.40362e+06	4.01414e+06	3.96646e+06	3.71128e+06	3.99198e+06	3.99198e+06	3.99198e+06	3.99198e+06	3.99198e+06	3.99198e+06	3.99198e+06	3.99198e+06
coal	South Africa	Africa	Sub-Saharan Africa	Medupi power station	Unit 4			794.8	operating	2017	2067	supercritical	bituminous					Eskom Holdings SOC [100%]	Eskom Holdings SOC [100.0%]	-23.705	27.5638	exact	Lephalale			Limpopo	https://www.gem.wiki/Medupi_power_station	L100000103432	G100000106783	ZAG000066697	1	14306.4		7	2057	2097	2137	4.40362e+06	4.01414e+06	3.96646e+06	3.71128e+06	3.99198e+06	3.99198e+06	3.99198e+06	3.99198e+06	3.99198e+06	3.99198e+06	3.99198e+06	3.99198e+06
coal	South Africa	Africa	Sub-Saharan Africa	Medupi power station	Unit 5			794.8	operating	2017	2067	supercritical	bituminous					Eskom Holdings SOC [100%]	Eskom Holdings SOC [100.0%]	-23.705	27.5638	exact	Lephalale			Limpopo	https://www.gem.wiki/Medupi_power_station	L100000103432	G100000106784	ZAG000066697	1	14306.4		7	2057	2097	2137	4.40362e+06	4.01414e+06	3.96646e+06	3.71128e+06	3.99198e+06	3.99198e+06	3.99198e+06	3.99198e+06	3.99198e+06	3.99198e+06	3.99198e+06	3.99198e+06
coal	South Africa	Africa	Sub-Saharan Africa	Medupi power station	Unit 6			794.8	operating	2015	2065	supercritical	bituminous					Eskom Holdings SOC [100%]	Eskom Holdings SOC [100.0%]	-23.705	27.5638	exact	Lephalale			Limpopo	https://www.gem.wiki/Medupi_power_station	L100000103432	G100000106785	ZAG000066697	1	14306.4	14306.4	9	2055	2095	2135	4.40362e+06	4.01414e+06	3.96646e+06	3.71128e+06	3.99198e+06	3.99198e+06	3.99198e+06	3.99198e+06	3.99198e+06	3.99198e+06	3.99198e+06	3.99198e+06
coal	South Africa	Africa	Sub-Saharan Africa	Tutuka power station	Unit 1			609	operating	1985	2035	subcritical	bituminous					Eskom Holdings SOC [100%]	Eskom Holdings SOC [100.0%]	-26.7772	29.3524	exact	Standerton		Gert Sibande	Mpumalanga	https://www.gem.wiki/Tutuka_power_station	L100000103452	G100000110396	ZAG000066697	1	10962		39	2025	2065	2105	3.37419e+06	3.07575e+06	3.03923e+06	2.84369e+06	3.05877e+06	3.05877e+06	3.05877e+06	3.05877e+06	3.05877e+06	3.05877e+06	3.05877e+06	3.05877e+06
coal	South Africa	Africa	Sub-Saharan Africa	Tutuka power station	Unit 2			609	operating	1985	2035	subcritical	bituminous					Eskom Holdings SOC [100%]	Eskom Holdings SOC [100.0%]	-26.7772	29.3524	exact	Standerton		Gert Sibande	Mpumalanga	https://www.gem.wiki/Tutuka_power_station	L100000103452	G100000110397	ZAG000066697	1	10962		39	2025	2065	2105	3.37419e+06	3.07575e+06	3.03923e+06	2.84369e+06	3.05877e+06	3.05877e+06	3.05877e+06	3.05877e+06	3.05877e+06	3.05877e+06	3.05877e+06	3.05877e+06
coal	South Africa	Africa	Sub-Saharan Africa	Tutuka power station	Unit 3			609	operating	1986	2036	subcritical	bituminous					Eskom Holdings SOC [100%]	Eskom Holdings SOC [100.0%]	-26.7772	29.3524	exact	Standerton		Gert Sibande	Mpumalanga	https://www.gem.wiki/Tutuka_power_station	L100000103452	G100000110398	ZAG000066697	1	10962		38	2026	2066	2106	3.37419e+06	3.07575e+06	3.03923e+06	2.84369e+06	3.05877e+06	3.05877e+06	3.05877e+06	3.05877e+06	3.05877e+06	3.05877e+06	3.05877e+06	3.05877e+06
coal	South Africa	Africa	Sub-Saharan Africa	Tutuka power station	Unit 4			609	operating	1987	2037	subcritical	bituminous					Eskom Holdings SOC [100%]	Eskom Holdings SOC [100.0%]	-26.7772	29.3524	exact	Standerton		Gert Sibande	Mpumalanga	https://www.gem.wiki/Tutuka_power_station	L100000103452	G100000110399	ZAG000066697	1	10962		37	2027	2067	2107	3.37419e+06	3.07575e+06	3.03923e+06	2.84369e+06	3.05877e+06	3.05877e+06	3.05877e+06	3.05877e+06	3.05877e+06	3.05877e+06	3.05877e+06	3.05877e+06
coal	South Africa	Africa	Sub-Saharan Africa	Tutuka power station	Unit 5			609	operating	1988	2038	subcritical	bituminous					Eskom Holdings SOC [100%]	Eskom Holdings SOC [100.0%]	-26.7772	29.3524	exact	Standerton		Gert Sibande	Mpumalanga	https://www.gem.wiki/Tutuka_power_station	L100000103452	G100000110400	ZAG000066697	1	10962		36	2028	2068	2108	3.37419e+06	3.07575e+06	3.03923e+06	2.84369e+06	3.05877e+06	3.05877e+06	3.05877e+06	3.05877e+06	3.05877e+06	3.05877e+06	3.05877e+06	3.05877e+06
coal	South Africa	Africa	Sub-Saharan Africa	Tutuka power station	Unit 6			609	operating	1990	2040	subcritical	bituminous					Eskom Holdings SOC [100%]	Eskom Holdings SOC [100.0%]	-26.7772	29.3524	exact	Standerton		Gert Sibande	Mpumalanga	https://www.gem.wiki/Tutuka_power_station	L100000103452	G100000110401	ZAG000066697	1	10962	10962	34	2030	2070	2110	3.37419e+06	3.07575e+06	3.03923e+06	2.84369e+06	3.05877e+06	3.05877e+06	3.05877e+06	3.05877e+06	3.05877e+06	3.05877e+06	3.05877e+06	3.05877e+06
oil/gas	South Africa	Africa	Sub-Saharan Africa	Acacia power station	1			57	operating	1976		GT	KER					Eskom Holdings SOC Ltd [100.0%]	Eskom Holdings SOC Ltd [100.0%]	-33.8831	18.5358	exact	Cape Town			Western Cape	https://www.gem.wiki/Acacia_power_station	L100000408170	G100000411354	ZAG000066697	1	513		48	2016	2056	2096	83253.5	83253.5	83253.5	83253.5	83253.5	83253.5	83253.5	83253.5	83253.5	83253.5	83253.5	83253.5
oil/gas	South Africa	Africa	Sub-Saharan Africa	Acacia power station	2			57	operating	1976		GT	KER					Eskom Holdings SOC Ltd [100.0%]	Eskom Holdings SOC Ltd [100.0%]	-33.8831	18.5358	exact	Cape Town			Western Cape	https://www.gem.wiki/Acacia_power_station	L100000408170	G100000411353	ZAG000066697	1	513		48	2016	2056	2096	83253.5	83253.5	83253.5	83253.5	83253.5	83253.5	83253.5	83253.5	83253.5	83253.5	83253.5	83253.5
oil/gas	South Africa	Africa	Sub-Saharan Africa	Acacia power station	3			57	operating	1976		GT	KER					Eskom Holdings SOC Ltd [100.0%]	Eskom Holdings SOC Ltd [100.0%]	-33.8831	18.5358	exact	Cape Town			Western Cape	https://www.gem.wiki/Acacia_power_station	L100000408170	G100000411352	ZAG000066697	1	513	513	48	2016	2056	2096	83253.5	83253.5	83253.5	83253.5	83253.5	83253.5	83253.5	83253.5	83253.5	83253.5	83253.5	83253.5
oil/gas	South Africa	Africa	Sub-Saharan Africa	Ankerlig power station	1-1			149.2	operating	2007		GT	D					Eskom Holdings SOC Ltd [100.0%]	Eskom Holdings SOC Ltd [100.0%]	-33.5895	18.4615	exact	Atlantis			Western Cape	https://www.gem.wiki/Ankerlig_power_station	L100000407107	G100000408556	ZAG000066697	1	4014.9		17	2047	2087	2127	217920	217920	217920	217920	217920	217920	217920	217920	217920	217920	217920	217920
oil/gas	South Africa	Africa	Sub-Saharan Africa	Ankerlig power station	1-2			149.2	operating	2007		GT	D					Eskom Holdings SOC Ltd [100.0%]	Eskom Holdings SOC Ltd [100.0%]	-33.5895	18.4615	exact	Atlantis			Western Cape	https://www.gem.wiki/Ankerlig_power_station	L100000407107	G100000414357	ZAG000066697	1	4014.9		17	2047	2087	2127	217920	217920	217920	217920	217920	217920	217920	217920	217920	217920	217920	217920
oil/gas	South Africa	Africa	Sub-Saharan Africa	Ankerlig power station	1-3			149.2	operating	2007		GT	D					Eskom Holdings SOC Ltd [100.0%]	Eskom Holdings SOC Ltd [100.0%]	-33.5895	18.4615	exact	Atlantis			Western Cape	https://www.gem.wiki/Ankerlig_power_station	L100000407107	G100000414356	ZAG000066697	1	4014.9		17	2047	2087	2127	217920	217920	217920	217920	217920	217920	217920	217920	217920	217920	217920	217920
oil/gas	South Africa	Africa	Sub-Saharan Africa	Ankerlig power station	1-4			149.2	operating	2007		GT	D					Eskom Holdings SOC Ltd [100.0%]	Eskom Holdings SOC Ltd [100.0%]	-33.5895	18.4615	exact	Atlantis			Western Cape	https://www.gem.wiki/Ankerlig_power_station	L100000407107	G100000414355	ZAG000066697	1	4014.9		17	2047	2087	2127	217920	217920	217920	217920	217920	217920	217920	217920	217920	217920	217920	217920
oil/gas	South Africa	Africa	Sub-Saharan Africa	Ankerlig power station	2-1			148.3	operating	2009		GT	D					Eskom Holdings SOC Ltd [100.0%]	Eskom Holdings SOC Ltd [100.0%]	-33.5895	18.4615	exact	Atlantis			Western Cape	https://www.gem.wiki/Ankerlig_power_station	L100000407107	G100000413925	ZAG000066697	1	4014.9		15	2049	2089	2129	216605	216605	216605	216605	216605	216605	216605	216605	216605	216605	216605	216605
oil/gas	South Africa	Africa	Sub-Saharan Africa	Ankerlig power station	2-2			148.3	operating	2009		GT	D					Eskom Holdings SOC Ltd [100.0%]	Eskom Holdings SOC Ltd [100.0%]	-33.5895	18.4615	exact	Atlantis			Western Cape	https://www.gem.wiki/Ankerlig_power_station	L100000407107	G100000414354	ZAG000066697	1	4014.9		15	2049	2089	2129	216605	216605	216605	216605	216605	216605	216605	216605	216605	216605	216605	216605
oil/gas	South Africa	Africa	Sub-Saharan Africa	Ankerlig power station	2-3			148.3	operating	2009		GT	D					Eskom Holdings SOC Ltd [100.0%]	Eskom Holdings SOC Ltd [100.0%]	-33.5895	18.4615	exact	Atlantis			Western Cape	https://www.gem.wiki/Ankerlig_power_station	L100000407107	G100000414353	ZAG000066697	1	4014.9		15	2049	2089	2129	216605	216605	216605	216605	216605	216605	216605	216605	216605	216605	216605	216605
oil/gas	South Africa	Africa	Sub-Saharan Africa	Ankerlig power station	2-4			148.3	operating	2009		GT	D					Eskom Holdings SOC Ltd [100.0%]	Eskom Holdings SOC Ltd [100.0%]	-33.5895	18.4615	exact	Atlantis			Western Cape	https://www.gem.wiki/Ankerlig_power_station	L100000407107	G100000414352	ZAG000066697	1	4014.9		15	2049	2089	2129	216605	216605	216605	216605	216605	216605	216605	216605	216605	216605	216605	216605
oil/gas	South Africa	Africa	Sub-Saharan Africa	Ankerlig power station	2-5			148.3	operating	2009		GT	D					Eskom Holdings SOC Ltd [100.0%]	Eskom Holdings SOC Ltd [100.0%]	-33.5895	18.4615	exact	Atlantis			Western Cape	https://www.gem.wiki/Ankerlig_power_station	L100000407107	G100000414351	ZAG000066697	1	4014.9	4014.9	15	2049	2089	2129	216605	216605	216605	216605	216605	216605	216605	216605	216605	216605	216605	216605
oil/gas	South Africa	Africa	Sub-Saharan Africa	Gourikwa power station	1			148	operating	2007		GT	D					Eskom Holdings SOC Ltd [100.0%]	Eskom Holdings SOC Ltd [100.0%]	-34.1668	21.9607	exact	Mossel Bay			Western Cape	https://www.gem.wiki/Gourikwa_power_station	L100000407108	G100000408557	ZAG000066697	1	2220		17	2047	2087	2127	216167	216167	216167	216167	216167	216167	216167	216167	216167	216167	216167	216167
oil/gas	South Africa	Africa	Sub-Saharan Africa	Gourikwa power station	2			148	operating	2007		GT	D					Eskom Holdings SOC Ltd [100.0%]	Eskom Holdings SOC Ltd [100.0%]	-34.1668	21.9607	exact	Mossel Bay			Western Cape	https://www.gem.wiki/Gourikwa_power_station	L100000407108	G100000410887	ZAG000066697	1	2220		17	2047	2087	2127	216167	216167	216167	216167	216167	216167	216167	216167	216167	216167	216167	216167
oil/gas	South Africa	Africa	Sub-Saharan Africa	Gourikwa power station	3			148	operating	2007		GT	D					Eskom Holdings SOC Ltd [100.0%]	Eskom Holdings SOC Ltd [100.0%]	-34.1668	21.9607	exact	Mossel Bay			Western Cape	https://www.gem.wiki/Gourikwa_power_station	L100000407108	G100000410886	ZAG000066697	1	2220		17	2047	2087	2127	216167	216167	216167	216167	216167	216167	216167	216167	216167	216167	216167	216167
oil/gas	South Africa	Africa	Sub-Saharan Africa	Gourikwa power station	4			148	operating	2009		GT	D					Eskom Holdings SOC Ltd [100.0%]	Eskom Holdings SOC Ltd [100.0%]	-34.1668	21.9607	exact	Mossel Bay			Western Cape	https://www.gem.wiki/Gourikwa_power_station	L100000407108	G100000410885	ZAG000066697	1	2220		15	2049	2089	2129	216167	216167	216167	216167	216167	216167	216167	216167	216167	216167	216167	216167
oil/gas	South Africa	Africa	Sub-Saharan Africa	Gourikwa power station	5			148	operating	2009		GT	D					Eskom Holdings SOC Ltd [100.0%]	Eskom Holdings SOC Ltd [100.0%]	-34.1668	21.9607	exact	Mossel Bay			Western Cape	https://www.gem.wiki/Gourikwa_power_station	L100000407108	G100000410884	ZAG000066697	1	2220	2220	15	2049	2089	2129	216167	216167	216167	216167	216167	216167	216167	216167	216167	216167	216167	216167
oil/gas	South Africa	Africa	Sub-Saharan Africa	Port Rex power station	4			57	operating	1976		GT	KER					Eskom Holdings SOC Ltd [100.0%]	Eskom Holdings SOC Ltd [100.0%]	-33.028	27.8818	exact	East London				https://www.gem.wiki/Port_Rex_power_station	L100000408172	G100000411351	ZAG000066697	1	513		48	2016	2056	2096	83253.5	83253.5	83253.5	83253.5	83253.5	83253.5	83253.5	83253.5	83253.5	83253.5	83253.5	83253.5
oil/gas	South Africa	Africa	Sub-Saharan Africa	Port Rex power station	5			57	operating	1976		GT	KER					Eskom Holdings SOC Ltd [100.0%]	Eskom Holdings SOC Ltd [100.0%]	-33.028	27.8818	exact	East London				https://www.gem.wiki/Port_Rex_power_station	L100000408172	G100000411350	ZAG000066697	1	513		48	2016	2056	2096	83253.5	83253.5	83253.5	83253.5	83253.5	83253.5	83253.5	83253.5	83253.5	83253.5	83253.5	83253.5
oil/gas	South Africa	Africa	Sub-Saharan Africa	Port Rex power station	6			57	operating	1976		GT	KER					Eskom Holdings SOC Ltd [100.0%]	Eskom Holdings SOC Ltd [100.0%]	-33.028	27.8818	exact	East London				https://www.gem.wiki/Port_Rex_power_station	L100000408172	G100000411349	ZAG000066697	1	513	513	48	2016	2056	2096	83253.5	83253.5	83253.5	83253.5	83253.5	83253.5	83253.5	83253.5	83253.5	83253.5	83253.5	83253.5
oil/gas	South Africa	Africa	Sub-Saharan Africa	Richards Bay (Eskom) power station	1			3000	pre-construction			CC	LNG					Eskom Holdings SOC Ltd [100.0%]	Eskom Holdings SOC Ltd [100.0%]	-28.771	31.9765	exact	Richards Bay			KwaZulu-Natal	https://www.gem.wiki/Richards_Bay_(Eskom)_power_station	L100000407360	G100000409408	ZAG000066697	1	9000	9000	-99	40	80	120	0	0	0	0	0	0	0	0	0	1.2578e+06	1.2578e+06	1.2578e+06
																																					TOTAL Carbon Emissions	234.781	222.382	218.785	204.937	224.203	228.221	228.221	228.221	228.221	229.478	229.478	229.478
																																					COAL	231.246	218.847	215.25	201.402	220.668	224.686	224.686	224.686	224.686	224.686	224.686	224.686
																																					GAS	0	0	0	0	0	0	0	0	0	0	0	0
																																					OIL	3.03554	3.03554	3.03554	3.03554	3.03554	3.03554	3.03554	3.03554	3.03554	3.03554	3.03554	3.03554
																																					OIL&GAS	3.53506	3.53506	3.53506	3.53506	3.53506	3.53506	3.53506	3.53506	3.53506	4.79286	4.79286	4.79286
Type	Country/area	Region	Subregion	Plant / Project name	Unit / Phase name	Plant / Project name (local)	Plant / Project name (other)	Capacity (MW)	Status	Start year	Retired year	Technology	Fuel	Country/area 1 (hydropower only)	Country/area 2 (hydropower only)	Country/area 1 Capacity (MW) (hydropower only)	Country/area 2 Capacity (MW) (hydropower only)	Owner	Parent	Latitude	Longitude	Location accuracy	City	Local area (taluk, county)	Major area (prefecture, district)	Subnational unit (state, province)	GEM.Wiki URL	GEM location ID	GEM unit/phase ID	CompISIN	Ownership	Plant capacity	Plant capacity	Age	Reinvestment year	Reinvestment year	Reinvestment year	2020	2021	2022	2023	2024	2025	2026	2027	2028	2029	2030	2031
coal	South Africa	Africa	Sub-Saharan Africa	Arnot power station	Unit 1			370	operating	1972	2026	subcritical	bituminous					Eskom Holdings SOC [100%]	Eskom Holdings SOC [100.0%]	-25.9438	29.792	exact	Rietkuil		Nkangala	Mpumalanga	https://www.gem.wiki/Arnot_power_station	L100000103438	G100000100348	ZAG000066697	1	7056		52	2012	2052	2092	2.05e+06	1.86869e+06	1.84649e+06	1.7277e+06	1.87322e+06	1.87322e+06	1.87322e+06	1.87322e+06	1.87322e+06	1.87322e+06	1.87322e+06	1.87322e+06
coal	South Africa	Africa	Sub-Saharan Africa	Arnot power station	Unit 2			390	operating	1971	2026	subcritical	bituminous					Eskom Holdings SOC [100%]	Eskom Holdings SOC [100.0%]	-25.9438	29.792	exact	Rietkuil		Nkangala	Mpumalanga	https://www.gem.wiki/Arnot_power_station	L100000103438	G100000100349	ZAG000066697	1	7056		53	2011	2051	2091	2.16081e+06	1.9697e+06	1.9463e+06	1.82108e+06	1.95882e+06	1.95882e+06	1.95882e+06	1.95882e+06	1.95882e+06	1.95882e+06	1.95882e+06	1.95882e+06
coal	South Africa	Africa	Sub-Saharan Africa	Arnot power station	Unit 3			396	operating	1971	2026	subcritical	bituminous					Eskom Holdings SOC [100%]	Eskom Holdings SOC [100.0%]	-25.9438	29.792	exact	Rietkuil		Nkangala	Mpumalanga	https://www.gem.wiki/Arnot_power_station	L100000103438	G100000100350	ZAG000066697	1	7056		53	2011	2051	2091	2.19406e+06	2e+06	1.97625e+06	1.8491e+06	1.98896e+06	1.98896e+06	1.98896e+06	1.98896e+06	1.98896e+06	1.98896e+06	1.98896e+06	1.98896e+06
coal	South Africa	Africa	Sub-Saharan Africa	Arnot power station	Unit 4			396	operating	1973	2027	subcritical	bituminous					Eskom Holdings SOC [100%]	Eskom Holdings SOC [100.0%]	-25.9438	29.792	exact	Rietkuil		Nkangala	Mpumalanga	https://www.gem.wiki/Arnot_power_station	L100000103438	G100000100351	ZAG000066697	1	7056		51	2013	2053	2093	2.19406e+06	2e+06	1.97625e+06	1.8491e+06	1.98896e+06	1.98896e+06	1.98896e+06	1.98896e+06	1.98896e+06	1.98896e+06	1.98896e+06	1.98896e+06
coal	South Africa	Africa	Sub-Saharan Africa	Arnot power station	Unit 5			400	operating	1974	2029	subcritical	bituminous					Eskom Holdings SOC [100%]	Eskom Holdings SOC [100.0%]	-25.9438	29.792	exact	Rietkuil		Nkangala	Mpumalanga	https://www.gem.wiki/Arnot_power_station	L100000103438	G100000100352	ZAG000066697	1	7056		50	2014	2054	2094	2.21622e+06	2.0202e+06	1.99621e+06	1.86778e+06	2.00905e+06	2.00905e+06	2.00905e+06	2.00905e+06	2.00905e+06	2.00905e+06	2.00905e+06	2.00905e+06
coal	South Africa	Africa	Sub-Saharan Africa	Arnot power station	Unit 6			400	operating	1975	2029	subcritical	bituminous					Eskom Holdings SOC [100%]	Eskom Holdings SOC [100.0%]	-25.9438	29.792	exact	Rietkuil		Nkangala	Mpumalanga	https://www.gem.wiki/Arnot_power_station	L100000103438	G100000100353	ZAG000066697	1	7056	7056	49	2015	2055	2095	2.21622e+06	2.0202e+06	1.99621e+06	1.86778e+06	2.00905e+06	2.00905e+06	2.00905e+06	2.00905e+06	2.00905e+06	2.00905e+06	2.00905e+06	2.00905e+06
coal	South Africa	Africa	Sub-Saharan Africa	Camden power station	Unit 1			200	operating	1968	2025	subcritical	bituminous					Eskom Holdings SOC [100%]	Eskom Holdings SOC [100.0%]	-26.6215	30.0901	exact	Camden		Gert Sibande	Mpumalanga	https://www.gem.wiki/Camden_power_station	L100000103439	G100000101168	ZAG000066697	1	4800		56	2008	2048	2088	1.10811e+06	1.0101e+06	998104	933889	1.00452e+06	1.00452e+06	1.00452e+06	1.00452e+06	1.00452e+06	1.00452e+06	1.00452e+06	1.00452e+06
coal	South Africa	Africa	Sub-Saharan Africa	Camden power station	Unit 2			200	operating	1967	2025	subcritical	bituminous					Eskom Holdings SOC [100%]	Eskom Holdings SOC [100.0%]	-26.6215	30.0901	exact	Camden		Gert Sibande	Mpumalanga	https://www.gem.wiki/Camden_power_station	L100000103439	G100000101169	ZAG000066697	1	4800		57	2007	2047	2087	1.10811e+06	1.0101e+06	998104	933889	1.00452e+06	1.00452e+06	1.00452e+06	1.00452e+06	1.00452e+06	1.00452e+06	1.00452e+06	1.00452e+06
coal	South Africa	Africa	Sub-Saharan Africa	Camden power station	Unit 3			200	operating	1967	2025	subcritical	bituminous					Eskom Holdings SOC [100%]	Eskom Holdings SOC [100.0%]	-26.6215	30.0901	exact	Camden		Gert Sibande	Mpumalanga	https://www.gem.wiki/Camden_power_station	L100000103439	G100000101170	ZAG000066697	1	4800		57	2007	2047	2087	1.10811e+06	1.0101e+06	998104	933889	1.00452e+06	1.00452e+06	1.00452e+06	1.00452e+06	1.00452e+06	1.00452e+06	1.00452e+06	1.00452e+06
coal	South Africa	Africa	Sub-Saharan Africa	Camden power station	Unit 4			200	operating	1967	2025	subcritical	bituminous					Eskom Holdings SOC [100%]	Eskom Holdings SOC [100.0%]	-26.6215	30.0901	exact	Camden		Gert Sibande	Mpumalanga	https://www.gem.wiki/Camden_power_station	L100000103439	G100000101171	ZAG000066697	1	4800		57	2007	2047	2087	1.10811e+06	1.0101e+06	998104	933889	1.00452e+06	1.00452e+06	1.00452e+06	1.00452e+06	1.00452e+06	1.00452e+06	1.00452e+06	1.00452e+06
coal	South Africa	Africa	Sub-Saharan Africa	Camden power station	Unit 5			200	operating	1967	2025	subcritical	bituminous					Eskom Holdings SOC [100%]	Eskom Holdings SOC [100.0%]	-26.6215	30.0901	exact	Camden		Gert Sibande	Mpumalanga	https://www.gem.wiki/Camden_power_station	L100000103439	G100000101172	ZAG000066697	1	4800		57	2007	2047	2087	1.10811e+06	1.0101e+06	998104	933889	1.00452e+06	1.00452e+06	1.00452e+06	1.00452e+06	1.00452e+06	1.00452e+06	1.00452e+06	1.00452e+06
coal	South Africa	Africa	Sub-Saharan Africa	Camden power station	Unit 6			200	operating	1968	2025	subcritical	bituminous					Eskom Holdings SOC [100%]	Eskom Holdings SOC [100.0%]	-26.6215	30.0901	exact	Camden		Gert Sibande	Mpumalanga	https://www.gem.wiki/Camden_power_station	L100000103439	G100000101173	ZAG000066697	1	4800		56	2008	2048	2088	1.10811e+06	1.0101e+06	998104	933889	1.00452e+06	1.00452e+06	1.00452e+06	1.00452e+06	1.00452e+06	1.00452e+06	1.00452e+06	1.00452e+06
coal	South Africa	Africa	Sub-Saharan Africa	Camden power station	Unit 7			200	operating	1969	2025	subcritical	bituminous					Eskom Holdings SOC [100%]	Eskom Holdings SOC [100.0%]	-26.6215	30.0901	exact	Camden		Gert Sibande	Mpumalanga	https://www.gem.wiki/Camden_power_station	L100000103439	G100000101174	ZAG000066697	1	4800		55	2009	2049	2089	1.10811e+06	1.0101e+06	998104	933889	1.00452e+06	1.00452e+06	1.00452e+06	1.00452e+06	1.00452e+06	1.00452e+06	1.00452e+06	1.00452e+06
coal	South Africa	Africa	Sub-Saharan Africa	Camden power station	Unit 8			200	operating	1969	2025	subcritical	bituminous					Eskom Holdings SOC [100%]	Eskom Holdings SOC [100.0%]	-26.6215	30.0901	exact	Camden		Gert Sibande	Mpumalanga	https://www.gem.wiki/Camden_power_station	L100000103439	G100000101175	ZAG000066697	1	4800	4800	55	2009	2049	2089	1.10811e+06	1.0101e+06	998104	933889	1.00452e+06	1.00452e+06	1.00452e+06	1.00452e+06	1.00452e+06	1.00452e+06	1.00452e+06	1.00452e+06
coal	South Africa	Africa	Sub-Saharan Africa	Duvha power station	Unit 1			600	operating	1980	2031	subcritical	bituminous					Eskom Holdings SOC [100%]	Eskom Holdings SOC [100.0%]	-25.9613	29.3397	exact	Witbank		Nkangala	Mpumalanga	https://www.gem.wiki/Duvha_power_station	L100000103440	G100000102524	ZAG000066697	1	10800		44	2020	2060	2100	3.32433e+06	3.0303e+06	2.99431e+06	2.80167e+06	3.01357e+06	3.01357e+06	3.01357e+06	3.01357e+06	3.01357e+06	3.01357e+06	3.01357e+06	3.01357e+06
coal	South Africa	Africa	Sub-Saharan Africa	Duvha power station	Unit 2			600	operating	1980	2031	subcritical	bituminous					Eskom Holdings SOC [100%]	Eskom Holdings SOC [100.0%]	-25.9613	29.3397	exact	Witbank		Nkangala	Mpumalanga	https://www.gem.wiki/Duvha_power_station	L100000103440	G100000102525	ZAG000066697	1	10800		44	2020	2060	2100	3.32433e+06	3.0303e+06	2.99431e+06	2.80167e+06	3.01357e+06	3.01357e+06	3.01357e+06	3.01357e+06	3.01357e+06	3.01357e+06	3.01357e+06	3.01357e+06
coal	South Africa	Africa	Sub-Saharan Africa	Duvha power station	Unit 3			600	mothballed	1981	2032	subcritical	bituminous					Eskom Holdings SOC [100%]	Eskom Holdings SOC [100.0%]	-25.9613	29.3397	exact	Witbank		Nkangala	Mpumalanga	https://www.gem.wiki/Duvha_power_station	L100000103440	G100000102526	ZAG000066697	1	10800		43	2021	2061	2101	0	0	0	0	0	0	0	0	0	0	0	0
coal	South Africa	Africa	Sub-Saharan Africa	Duvha power station	Unit 4			600	operating	1982	2033	subcritical	bituminous					Eskom Holdings SOC [100%]	Eskom Holdings SOC [100.0%]	-25.9613	29.3397	exact	Witbank		Nkangala	Mpumalanga	https://www.gem.wiki/Duvha_power_station	L100000103440	G100000102527	ZAG000066697	1	10800		42	2022	2062	2102	3.32433e+06	3.0303e+06	2.99431e+06	2.80167e+06	3.01357e+06	3.01357e+06	3.01357e+06	3.01357e+06	3.01357e+06	3.01357e+06	3.01357e+06	3.01357e+06
coal	South Africa	Africa	Sub-Saharan Africa	Duvha power station	Unit 5			600	operating	1983	2033	subcritical	bituminous					Eskom Holdings SOC [100%]	Eskom Holdings SOC [100.0%]	-25.9613	29.3397	exact	Witbank		Nkangala	Mpumalanga	https://www.gem.wiki/Duvha_power_station	L100000103440	G100000102528	ZAG000066697	1	10800		41	2023	2063	2103	3.32433e+06	3.0303e+06	2.99431e+06	2.80167e+06	3.01357e+06	3.01357e+06	3.01357e+06	3.01357e+06	3.01357e+06	3.01357e+06	3.01357e+06	3.01357e+06
coal	South Africa	Africa	Sub-Saharan Africa	Duvha power station	Unit 6			600	operating	1984	2034	subcritical	bituminous					Eskom Holdings SOC [100%]	Eskom Holdings SOC [100.0%]	-25.9613	29.3397	exact	Witbank		Nkangala	Mpumalanga	https://www.gem.wiki/Duvha_power_station	L100000103440	G100000102529	ZAG000066697	1	10800	10800	40	2024	2064	2104	3.32433e+06	3.0303e+06	2.99431e+06	2.80167e+06	3.01357e+06	3.01357e+06	3.01357e+06	3.01357e+06	3.01357e+06	3.01357e+06	3.01357e+06	3.01357e+06
coal	South Africa	Africa	Sub-Saharan Africa	Grootvlei power station	Unit 1			200	operating	1973	2027	subcritical	bituminous					Eskom Holdings SOC [100%]	Eskom Holdings SOC [100.0%]	-26.7685	28.4978	exact	Grootvlei		Gert Sibande	Mpumalanga	https://www.gem.wiki/Grootvlei_power_station	L100000103441	G100000103136	ZAG000066697	1	3570		51	2013	2053	2093	1.10811e+06	1.0101e+06	998104	933889	1.00452e+06	1.00452e+06	1.00452e+06	1.00452e+06	1.00452e+06	1.00452e+06	1.00452e+06	1.00452e+06
coal	South Africa	Africa	Sub-Saharan Africa	Grootvlei power station	Unit 2			200	operating	1970	2027	subcritical	bituminous					Eskom Holdings SOC [100%]	Eskom Holdings SOC [100.0%]	-26.7685	28.4978	exact	Grootvlei		Gert Sibande	Mpumalanga	https://www.gem.wiki/Grootvlei_power_station	L100000103441	G100000103137	ZAG000066697	1	3570		54	2010	2050	2090	1.10811e+06	1.0101e+06	998104	933889	1.00452e+06	1.00452e+06	1.00452e+06	1.00452e+06	1.00452e+06	1.00452e+06	1.00452e+06	1.00452e+06
coal	South Africa	Africa	Sub-Saharan Africa	Grootvlei power station	Unit 3			200	operating	1969	2027	subcritical	bituminous					Eskom Holdings SOC [100%]	Eskom Holdings SOC [100.0%]	-26.7685	28.4978	exact	Grootvlei		Gert Sibande	Mpumalanga	https://www.gem.wiki/Grootvlei_power_station	L100000103441	G100000103138	ZAG000066697	1	3570		55	2009	2049	2089	1.10811e+06	1.0101e+06	998104	933889	1.00452e+06	1.00452e+06	1.00452e+06	1.00452e+06	1.00452e+06	1.00452e+06	1.00452e+06	1.00452e+06
coal	South Africa	Africa	Sub-Saharan Africa	Grootvlei power station	Unit 4			200	mothballed	1969	2025	subcritical	bituminous					Eskom Holdings SOC [100%]	Eskom Holdings SOC [100.0%]	-26.7685	28.4978	exact	Grootvlei		Gert Sibande	Mpumalanga	https://www.gem.wiki/Grootvlei_power_station	L100000103441	G100000103139	ZAG000066697	1	3570		55	2009	2049	2089	0	0	0	0	0	0	0	0	0	0	0	0
coal	South Africa	Africa	Sub-Saharan Africa	Grootvlei power station	Unit 5			190	mothballed	1971	2025	subcritical	bituminous					Eskom Holdings SOC [100%]	Eskom Holdings SOC [100.0%]	-26.7685	28.4978	exact	Grootvlei		Gert Sibande	Mpumalanga	https://www.gem.wiki/Grootvlei_power_station	L100000103441	G100000103140	ZAG000066697	1	3570		53	2011	2051	2091	0	0	0	0	0	0	0	0	0	0	0	0
coal	South Africa	Africa	Sub-Saharan Africa	Grootvlei power station	Unit 6			200	mothballed	1977	2025	subcritical	bituminous					Eskom Holdings SOC [100%]	Eskom Holdings SOC [100.0%]	-26.7685	28.4978	exact	Grootvlei		Gert Sibande	Mpumalanga	https://www.gem.wiki/Grootvlei_power_station	L100000103441	G100000103141	ZAG000066697	1	3570	3570	47	2017	2057	2097	0	0	0	0	0	0	0	0	0	0	0	0
coal	South Africa	Africa	Sub-Saharan Africa	Hendrina power station	Unit 1			200	mothballed	1972	2025	subcritical	bituminous					Eskom Holdings SOC [100%]	Eskom Holdings SOC [100.0%]	-26.032	29.6016	exact	Pullens Hope		Nkangala	Mpumalanga	https://www.gem.wiki/Hendrina_power_station	L100000103442	G100000103806	ZAG000066697	1	6000		52	2012	2052	2092	0	0	0	0	0	0	0	0	0	0	0	0
coal	South Africa	Africa	Sub-Saharan Africa	Hendrina power station	Unit 10			200	operating	1977	2025	subcritical	bituminous					Eskom Holdings SOC [100%]	Eskom Holdings SOC [100.0%]	-26.032	29.6016	exact	Pullens Hope		Nkangala	Mpumalanga	https://www.gem.wiki/Hendrina_power_station	L100000103442	G100000103807	ZAG000066697	1	6000		47	2017	2057	2097	1.10811e+06	1.0101e+06	998104	933889	1.00452e+06	1.00452e+06	1.00452e+06	1.00452e+06	1.00452e+06	1.00452e+06	1.00452e+06	1.00452e+06
coal	South Africa	Africa	Sub-Saharan Africa	Hendrina power station	Unit 2			200	operating	1971	2025	subcritical	bituminous					Eskom Holdings SOC [100%]	Eskom Holdings SOC [100.0%]	-26.032	29.6016	exact	Pullens Hope		Nkangala	Mpumalanga	https://www.gem.wiki/Hendrina_power_station	L100000103442	G100000103808	ZAG000066697	1	6000		53	2011	2051	2091	1.10811e+06	1.0101e+06	998104	933889	1.00452e+06	1.00452e+06	1.00452e+06	1.00452e+06	1.00452e+06	1.00452e+06	1.00452e+06	1.00452e+06
coal	South Africa	Africa	Sub-Saharan Africa	Hendrina power station	Unit 3			200	mothballed	1970	2025	subcritical	bituminous					Eskom Holdings SOC [100%]	Eskom Holdings SOC [100.0%]	-26.032	29.6016	exact	Pullens Hope		Nkangala	Mpumalanga	https://www.gem.wiki/Hendrina_power_station	L100000103442	G100000103809	ZAG000066697	1	6000		54	2010	2050	2090	0	0	0	0	0	0	0	0	0	0	0	0
coal	South Africa	Africa	Sub-Saharan Africa	Hendrina power station	Unit 4			200	operating	1970	2025	subcritical	bituminous					Eskom Holdings SOC [100%]	Eskom Holdings SOC [100.0%]	-26.032	29.6016	exact	Pullens Hope		Nkangala	Mpumalanga	https://www.gem.wiki/Hendrina_power_station	L100000103442	G100000103810	ZAG000066697	1	6000		54	2010	2050	2090	1.10811e+06	1.0101e+06	998104	933889	1.00452e+06	1.00452e+06	1.00452e+06	1.00452e+06	1.00452e+06	1.00452e+06	1.00452e+06	1.00452e+06
coal	South Africa	Africa	Sub-Saharan Africa	Hendrina power station	Unit 5			200	operating	1971	2025	subcritical	bituminous					Eskom Holdings SOC [100%]	Eskom Holdings SOC [100.0%]	-26.032	29.6016	exact	Pullens Hope		Nkangala	Mpumalanga	https://www.gem.wiki/Hendrina_power_station	L100000103442	G100000103811	ZAG000066697	1	6000		53	2011	2051	2091	1.10811e+06	1.0101e+06	998104	933889	1.00452e+06	1.00452e+06	1.00452e+06	1.00452e+06	1.00452e+06	1.00452e+06	1.00452e+06	1.00452e+06
coal	South Africa	Africa	Sub-Saharan Africa	Hendrina power station	Unit 6			200	operating	1973	2025	subcritical	bituminous					Eskom Holdings SOC [100%]	Eskom Holdings SOC [100.0%]	-26.032	29.6016	exact	Pullens Hope		Nkangala	Mpumalanga	https://www.gem.wiki/Hendrina_power_station	L100000103442	G100000103812	ZAG000066697	1	6000		51	2013	2053	2093	1.10811e+06	1.0101e+06	998104	933889	1.00452e+06	1.00452e+06	1.00452e+06	1.00452e+06	1.00452e+06	1.00452e+06	1.00452e+06	1.00452e+06
coal	South Africa	Africa	Sub-Saharan Africa	Hendrina power station	Unit 7			200	operating	1974	2025	subcritical	bituminous					Eskom Holdings SOC [100%]	Eskom Holdings SOC [100.0%]	-26.032	29.6016	exact	Pullens Hope		Nkangala	Mpumalanga	https://www.gem.wiki/Hendrina_power_station	L100000103442	G100000103813	ZAG000066697	1	6000		50	2014	2054	2094	1.10811e+06	1.0101e+06	998104	933889	1.00452e+06	1.00452e+06	1.00452e+06	1.00452e+06	1.00452e+06	1.00452e+06	1.00452e+06	1.00452e+06
coal	South Africa	Africa	Sub-Saharan Africa	Hendrina power station	Unit 8			200	operating	1975	2025	subcritical	bituminous					Eskom Holdings SOC [100%]	Eskom Holdings SOC [100.0%]	-26.032	29.6016	exact	Pullens Hope		Nkangala	Mpumalanga	https://www.gem.wiki/Hendrina_power_station	L100000103442	G100000103814	ZAG000066697	1	6000		49	2015	2055	2095	1.10811e+06	1.0101e+06	998104	933889	1.00452e+06	1.00452e+06	1.00452e+06	1.00452e+06	1.00452e+06	1.00452e+06	1.00452e+06	1.00452e+06
coal	South Africa	Africa	Sub-Saharan Africa	Hendrina power station	Unit 9			200	mothballed	1976	2025	subcritical	bituminous					Eskom Holdings SOC [100%]	Eskom Holdings SOC [100.0%]	-26.032	29.6016	exact	Pullens Hope		Nkangala	Mpumalanga	https://www.gem.wiki/Hendrina_power_station	L100000103442	G100000103815	ZAG000066697	1	6000	6000	48	2016	2056	2096	0	0	0	0	0	0	0	0	0	0	0	0
coal	South Africa	Africa	Sub-Saharan Africa	Kendal power station	Unit 1			686	operating	1988	2038	subcritical	bituminous					Eskom Holdings SOC [100%]	Eskom Holdings SOC [100.0%]	-26.0903	28.9688	exact	Kendal		Nkangala	Mpumalanga	https://www.gem.wiki/Kendal_power_station	L100000103443	G100000105663	ZAG000066697	1	12348		36	2028	2068	2108	3.80081e+06	3.46464e+06	3.4235e+06	3.20324e+06	3.44552e+06	3.44552e+06	3.44552e+06	3.44552e+06	3.44552e+06	3.44552e+06	3.44552e+06	3.44552e+06
coal	South Africa	Africa	Sub-Saharan Africa	Kendal power station	Unit 2			686	operating	1989	2039	subcritical	bituminous					Eskom Holdings SOC [100%]	Eskom Holdings SOC [100.0%]	-26.0903	28.9688	exact	Kendal		Nkangala	Mpumalanga	https://www.gem.wiki/Kendal_power_station	L100000103443	G100000105664	ZAG000066697	1	12348		35	2029	2069	2109	3.80081e+06	3.46464e+06	3.4235e+06	3.20324e+06	3.44552e+06	3.44552e+06	3.44552e+06	3.44552e+06	3.44552e+06	3.44552e+06	3.44552e+06	3.44552e+06
coal	South Africa	Africa	Sub-Saharan Africa	Kendal power station	Unit 3			686	operating	1990	2040	subcritical	bituminous					Eskom Holdings SOC [100%]	Eskom Holdings SOC [100.0%]	-26.0903	28.9688	exact	Kendal		Nkangala	Mpumalanga	https://www.gem.wiki/Kendal_power_station	L100000103443	G100000105665	ZAG000066697	1	12348		34	2030	2070	2110	3.80081e+06	3.46464e+06	3.4235e+06	3.20324e+06	3.44552e+06	3.44552e+06	3.44552e+06	3.44552e+06	3.44552e+06	3.44552e+06	3.44552e+06	3.44552e+06
coal	South Africa	Africa	Sub-Saharan Africa	Kendal power station	Unit 4			686	operating	1991	2041	subcritical	bituminous					Eskom Holdings SOC [100%]	Eskom Holdings SOC [100.0%]	-26.0903	28.9688	exact	Kendal		Nkangala	Mpumalanga	https://www.gem.wiki/Kendal_power_station	L100000103443	G100000105666	ZAG000066697	1	12348		33	2031	2071	2111	3.80081e+06	3.46464e+06	3.4235e+06	3.20324e+06	3.44552e+06	3.44552e+06	3.44552e+06	3.44552e+06	3.44552e+06	3.44552e+06	3.44552e+06	3.44552e+06
coal	South Africa	Africa	Sub-Saharan Africa	Kendal power station	Unit 5			686	operating	1992	2042	subcritical	bituminous					Eskom Holdings SOC [100%]	Eskom Holdings SOC [100.0%]	-26.0903	28.9688	exact	Kendal		Nkangala	Mpumalanga	https://www.gem.wiki/Kendal_power_station	L100000103443	G100000105667	ZAG000066697	1	12348		32	2032	2072	2112	3.80081e+06	3.46464e+06	3.4235e+06	3.20324e+06	3.44552e+06	3.44552e+06	3.44552e+06	3.44552e+06	3.44552e+06	3.44552e+06	3.44552e+06	3.44552e+06
coal	South Africa	Africa	Sub-Saharan Africa	Kendal power station	Unit 6			686	operating	1993	2043	subcritical	bituminous					Eskom Holdings SOC [100%]	Eskom Holdings SOC [100.0%]	-26.0903	28.9688	exact	Kendal		Nkangala	Mpumalanga	https://www.gem.wiki/Kendal_power_station	L100000103443	G100000105668	ZAG000066697	1	12348	12348	31	2033	2073	2113	3.80081e+06	3.46464e+06	3.4235e+06	3.20324e+06	3.44552e+06	3.44552e+06	3.44552e+06	3.44552e+06	3.44552e+06	3.44552e+06	3.44552e+06	3.44552e+06
coal	South Africa	Africa	Sub-Saharan Africa	Komati power station	Unit 1			100	retired	1961	2022	subcritical	bituminous					Eskom Holdings SOC [100%]	Eskom Holdings SOC [100.0%]	-26.0908	29.4745	exact	Middleburg			Mpumalanga	https://www.gem.wiki/Komati_power_station	L100000103446	G100000105828	ZAG000066697	1	3000		63	2001	2041	2081	554054	505050	0	0	0	0	0	0	0	0	0	0
coal	South Africa	Africa	Sub-Saharan Africa	Komati power station	Unit 2			100	retired	1962	2022	subcritical	bituminous					Eskom Holdings SOC [100%]	Eskom Holdings SOC [100.0%]	-26.0908	29.4745	exact	Middleburg			Mpumalanga	https://www.gem.wiki/Komati_power_station	L100000103446	G100000105829	ZAG000066697	1	3000		62	2002	2042	2082	554054	505050	0	0	0	0	0	0	0	0	0	0
coal	South Africa	Africa	Sub-Saharan Africa	Komati power station	Unit 3			100	retired	1962	2022	subcritical	bituminous					Eskom Holdings SOC [100%]	Eskom Holdings SOC [100.0%]	-26.0908	29.4745	exact	Middleburg			Mpumalanga	https://www.gem.wiki/Komati_power_station	L100000103446	G100000105830	ZAG000066697	1	3000		62	2002	2042	2082	554054	505050	0	0	0	0	0	0	0	0	0	0
coal	South Africa	Africa	Sub-Saharan Africa	Komati power station	Unit 4			100	retired	1963	2022	subcritical	bituminous					Eskom Holdings SOC [100%]	Eskom Holdings SOC [100.0%]	-26.0908	29.4745	exact	Middleburg			Mpumalanga	https://www.gem.wiki/Komati_power_station	L100000103446	G100000105831	ZAG000066697	1	3000		61	2003	2043	2083	554054	505050	0	0	0	0	0	0	0	0	0	0
coal	South Africa	Africa	Sub-Saharan Africa	Komati power station	Unit 5			100	retired	1963	2022	subcritical	bituminous					Eskom Holdings SOC [100%]	Eskom Holdings SOC [100.0%]	-26.0908	29.4745	exact	Middleburg			Mpumalanga	https://www.gem.wiki/Komati_power_station	L100000103446	G100000105832	ZAG000066697	1	3000		61	2003	2043	2083	554054	505050	0	0	0	0	0	0	0	0	0	0
coal	South Africa	Africa	Sub-Saharan Africa	Komati power station	Unit 6			125	retired	1964	2022	subcritical	bituminous					Eskom Holdings SOC [100%]	Eskom Holdings SOC [100.0%]	-26.0908	29.4745	exact	Middleburg			Mpumalanga	https://www.gem.wiki/Komati_power_station	L100000103446	G100000105833	ZAG000066697	1	3000		60	2004	2044	2084	692568	631313	0	0	0	0	0	0	0	0	0	0
coal	South Africa	Africa	Sub-Saharan Africa	Komati power station	Unit 7			125	retired	1964	2022	subcritical	bituminous					Eskom Holdings SOC [100%]	Eskom Holdings SOC [100.0%]	-26.0908	29.4745	exact	Middleburg			Mpumalanga	https://www.gem.wiki/Komati_power_station	L100000103446	G100000105834	ZAG000066697	1	3000		60	2004	2044	2084	692568	631313	0	0	0	0	0	0	0	0	0	0
coal	South Africa	Africa	Sub-Saharan Africa	Komati power station	Unit 8			125	retired	1964	2022	subcritical	bituminous					Eskom Holdings SOC [100%]	Eskom Holdings SOC [100.0%]	-26.0908	29.4745	exact	Middleburg			Mpumalanga	https://www.gem.wiki/Komati_power_station	L100000103446	G100000105835	ZAG000066697	1	3000		60	2004	2044	2084	692568	631313	0	0	0	0	0	0	0	0	0	0
coal	South Africa	Africa	Sub-Saharan Africa	Komati power station	Unit 9			125	retired	1964	2022	subcritical	bituminous					Eskom Holdings SOC [100%]	Eskom Holdings SOC [100.0%]	-26.0908	29.4745	exact	Middleburg			Mpumalanga	https://www.gem.wiki/Komati_power_station	L100000103446	G100000105836	ZAG000066697	1	3000	3000	60	2004	2044	2084	692568	631313	0	0	0	0	0	0	0	0	0	0
coal	South Africa	Africa	Sub-Saharan Africa	Kriel power station	Unit 1			500	operating	1976	2026	subcritical	bituminous					Eskom Holdings SOC [100%]	Eskom Holdings SOC [100.0%]	-26.2539	29.1785	exact	Kriel		Nkangala	Mpumalanga	https://www.gem.wiki/Kriel_power_station	L100000103447	G100000105964	ZAG000066697	1	9000		48	2016	2056	2096	2.77027e+06	2.52525e+06	2.49526e+06	2.33472e+06	2.51131e+06	2.51131e+06	2.51131e+06	2.51131e+06	2.51131e+06	2.51131e+06	2.51131e+06	2.51131e+06
coal	South Africa	Africa	Sub-Saharan Africa	Kriel power station	Unit 2			500	operating	1976	2027	subcritical	bituminous					Eskom Holdings SOC [100%]	Eskom Holdings SOC [100.0%]	-26.2539	29.1785	exact	Kriel		Nkangala	Mpumalanga	https://www.gem.wiki/Kriel_power_station	L100000103447	G100000105965	ZAG000066697	1	9000		48	2016	2056	2096	2.77027e+06	2.52525e+06	2.49526e+06	2.33472e+06	2.51131e+06	2.51131e+06	2.51131e+06	2.51131e+06	2.51131e+06	2.51131e+06	2.51131e+06	2.51131e+06
coal	South Africa	Africa	Sub-Saharan Africa	Kriel power station	Unit 3			500	operating	1977	2028	subcritical	bituminous					Eskom Holdings SOC [100%]	Eskom Holdings SOC [100.0%]	-26.2539	29.1785	exact	Kriel		Nkangala	Mpumalanga	https://www.gem.wiki/Kriel_power_station	L100000103447	G100000105966	ZAG000066697	1	9000		47	2017	2057	2097	2.77027e+06	2.52525e+06	2.49526e+06	2.33472e+06	2.51131e+06	2.51131e+06	2.51131e+06	2.51131e+06	2.51131e+06	2.51131e+06	2.51131e+06	2.51131e+06
coal	South Africa	Africa	Sub-Saharan Africa	Kriel power station	Unit 4			500	operating	1978	2029	subcritical	bituminous					Eskom Holdings SOC [100%]	Eskom Holdings SOC [100.0%]	-26.2539	29.1785	exact	Kriel		Nkangala	Mpumalanga	https://www.gem.wiki/Kriel_power_station	L100000103447	G100000105967	ZAG000066697	1	9000		46	2018	2058	2098	2.77027e+06	2.52525e+06	2.49526e+06	2.33472e+06	2.51131e+06	2.51131e+06	2.51131e+06	2.51131e+06	2.51131e+06	2.51131e+06	2.51131e+06	2.51131e+06
coal	South Africa	Africa	Sub-Saharan Africa	Kriel power station	Unit 5			500	operating	1979	2029	subcritical	bituminous					Eskom Holdings SOC [100%]	Eskom Holdings SOC [100.0%]	-26.2539	29.1785	exact	Kriel		Nkangala	Mpumalanga	https://www.gem.wiki/Kriel_power_station	L100000103447	G100000105968	ZAG000066697	1	9000		45	2019	2059	2099	2.77027e+06	2.52525e+06	2.49526e+06	2.33472e+06	2.51131e+06	2.51131e+06	2.51131e+06	2.51131e+06	2.51131e+06	2.51131e+06	2.51131e+06	2.51131e+06
coal	South Africa	Africa	Sub-Saharan Africa	Kriel power station	Unit 6			500	operating	1979	2030	subcritical	bituminous					Eskom Holdings SOC [100%]	Eskom Holdings SOC [100.0%]	-26.2539	29.1785	exact	Kriel		Nkangala	Mpumalanga	https://www.gem.wiki/Kriel_power_station	L100000103447	G100000105969	ZAG000066697	1	9000	9000	45	2019	2059	2099	2.77027e+06	2.52525e+06	2.49526e+06	2.33472e+06	2.51131e+06	2.51131e+06	2.51131e+06	2.51131e+06	2.51131e+06	2.51131e+06	2.51131e+06	2.51131e+06
coal	South Africa	Africa	Sub-Saharan Africa	Kusile power station	Unit 1			800	operating	2018	2069	supercritical	bituminous					Eskom Holdings SOC [100%]	Eskom Holdings SOC [100.0%]	-25.9201	28.9249	exact	Witbank			Mpumalanga	https://www.gem.wiki/Kusile_power_station	L100000103448	G100000106039	ZAG000066697	1	14400		6	2058	2098	2138	4.43243e+06	4.0404e+06	3.99242e+06	3.73556e+06	4.01809e+06	4.01809e+06	4.01809e+06	4.01809e+06	4.01809e+06	4.01809e+06	4.01809e+06	4.01809e+06
coal	South Africa	Africa	Sub-Saharan Africa	Kusile power station	Unit 2			800	operating	2020	2070	supercritical	bituminous					Eskom Holdings SOC [100%]	Eskom Holdings SOC [100.0%]	-25.9201	28.9249	exact	Witbank			Mpumalanga	https://www.gem.wiki/Kusile_power_station	L100000103448	G100000106040	ZAG000066697	1	14400		4	2060	2100	2140	4.43243e+06	4.0404e+06	3.99242e+06	3.73556e+06	4.01809e+06	4.01809e+06	4.01809e+06	4.01809e+06	4.01809e+06	4.01809e+06	4.01809e+06	4.01809e+06
coal	South Africa	Africa	Sub-Saharan Africa	Kusile power station	Unit 3			800	operating	2021	2071	supercritical	bituminous					Eskom Holdings SOC [100%]	Eskom Holdings SOC [100.0%]	-25.9201	28.9249	exact	Witbank			Mpumalanga	https://www.gem.wiki/Kusile_power_station	L100000103448	G100000106041	ZAG000066697	1	14400		3	2061	2101	2141	0	4.0404e+06	3.99242e+06	3.73556e+06	4.01809e+06	4.01809e+06	4.01809e+06	4.01809e+06	4.01809e+06	4.01809e+06	4.01809e+06	4.01809e+06
coal	South Africa	Africa	Sub-Saharan Africa	Kusile power station	Unit 4			800	operating	2022		supercritical	bituminous					Eskom Holdings SOC [100%]	Eskom Holdings SOC [100.0%]	-25.9201	28.9249	exact	Witbank			Mpumalanga	https://www.gem.wiki/Kusile_power_station	L100000103448	G100000106042	ZAG000066697	1	14400		2	2062	2102	2142	0	0	3.99242e+06	3.73556e+06	4.01809e+06	4.01809e+06	4.01809e+06	4.01809e+06	4.01809e+06	4.01809e+06	4.01809e+06	4.01809e+06
coal	South Africa	Africa	Sub-Saharan Africa	Kusile power station	Unit 5			800	construction	2024		supercritical	bituminous					Eskom Holdings SOC [100%]	Eskom Holdings SOC [100.0%]	-25.9201	28.9249	exact	Witbank			Mpumalanga	https://www.gem.wiki/Kusile_power_station	L100000103448	G100000106043	ZAG000066697	1	14400		0	2064	2104	2144	0	0	0	0	4.01809e+06	4.01809e+06	4.01809e+06	4.01809e+06	4.01809e+06	4.01809e+06	4.01809e+06	4.01809e+06
coal	South Africa	Africa	Sub-Saharan Africa	Kusile power station	Unit 6			800	construction	2025		supercritical	bituminous					Eskom Holdings SOC [100%]	Eskom Holdings SOC [100.0%]	-25.9201	28.9249	exact	Witbank			Mpumalanga	https://www.gem.wiki/Kusile_power_station	L100000103448	G100000106044	ZAG000066697	1	14400	14400	-1	2065	2105	2145	0	0	0	0	0	4.01809e+06	4.01809e+06	4.01809e+06	4.01809e+06	4.01809e+06	4.01809e+06	4.01809e+06
coal	South Africa	Africa	Sub-Saharan Africa	Lethabo power station	Unit 1			618	operating	1985	2035	subcritical	bituminous					Eskom Holdings SOC [100%]	Eskom Holdings SOC [100.0%]	-26.742	27.9769	exact	Viljoensdrif		Fezile Dabi	Free State	https://www.gem.wiki/Lethabo_power_station	L100000103423	G100000106240	ZAG000066697	1	11124		39	2025	2065	2105	3.42406e+06	3.12121e+06	3.08414e+06	2.88572e+06	3.10398e+06	3.10398e+06	3.10398e+06	3.10398e+06	3.10398e+06	3.10398e+06	3.10398e+06	3.10398e+06
coal	South Africa	Africa	Sub-Saharan Africa	Lethabo power station	Unit 2			618	operating	1986	2036	subcritical	bituminous					Eskom Holdings SOC [100%]	Eskom Holdings SOC [100.0%]	-26.742	27.9769	exact	Viljoensdrif		Fezile Dabi	Free State	https://www.gem.wiki/Lethabo_power_station	L100000103423	G100000106241	ZAG000066697	1	11124		38	2026	2066	2106	3.42406e+06	3.12121e+06	3.08414e+06	2.88572e+06	3.10398e+06	3.10398e+06	3.10398e+06	3.10398e+06	3.10398e+06	3.10398e+06	3.10398e+06	3.10398e+06
coal	South Africa	Africa	Sub-Saharan Africa	Lethabo power station	Unit 3			618	operating	1987	2037	subcritical	bituminous					Eskom Holdings SOC [100%]	Eskom Holdings SOC [100.0%]	-26.742	27.9769	exact	Viljoensdrif		Fezile Dabi	Free State	https://www.gem.wiki/Lethabo_power_station	L100000103423	G100000106242	ZAG000066697	1	11124		37	2027	2067	2107	3.42406e+06	3.12121e+06	3.08414e+06	2.88572e+06	3.10398e+06	3.10398e+06	3.10398e+06	3.10398e+06	3.10398e+06	3.10398e+06	3.10398e+06	3.10398e+06
coal	South Africa	Africa	Sub-Saharan Africa	Lethabo power station	Unit 4			618	operating	1987	2037	subcritical	bituminous					Eskom Holdings SOC [100%]	Eskom Holdings SOC [100.0%]	-26.742	27.9769	exact	Viljoensdrif		Fezile Dabi	Free State	https://www.gem.wiki/Lethabo_power_station	L100000103423	G100000106243	ZAG000066697	1	11124		37	2027	2067	2107	3.42406e+06	3.12121e+06	3.08414e+06	2.88572e+06	3.10398e+06	3.10398e+06	3.10398e+06	3.10398e+06	3.10398e+06	3.10398e+06	3.10398e+06	3.10398e+06
coal	South Africa	Africa	Sub-Saharan Africa	Lethabo power station	Unit 5			618	operating	1989	2039	subcritical	bituminous					Eskom Holdings SOC [100%]	Eskom Holdings SOC [100.0%]	-26.742	27.9769	exact	Viljoensdrif		Fezile Dabi	Free State	https://www.gem.wiki/Lethabo_power_station	L100000103423	G100000106244	ZAG000066697	1	11124		35	2029	2069	2109	3.42406e+06	3.12121e+06	3.08414e+06	2.88572e+06	3.10398e+06	3.10398e+06	3.10398e+06	3.10398e+06	3.10398e+06	3.10398e+06	3.10398e+06	3.10398e+06
coal	South Africa	Africa	Sub-Saharan Africa	Lethabo power station	Unit 6			618	operating	1990	2040	subcritical	bituminous					Eskom Holdings SOC [100%]	Eskom Holdings SOC [100.0%]	-26.742	27.9769	exact	Viljoensdrif		Fezile Dabi	Free State	https://www.gem.wiki/Lethabo_power_station	L100000103423	G100000106245	ZAG000066697	1	11124	11124	34	2030	2070	2110	3.42406e+06	3.12121e+06	3.08414e+06	2.88572e+06	3.10398e+06	3.10398e+06	3.10398e+06	3.10398e+06	3.10398e+06	3.10398e+06	3.10398e+06	3.10398e+06
coal	South Africa	Africa	Sub-Saharan Africa	Majuba power station	Unit 1			665	operating	1996	2046	subcritical	bituminous					Eskom Holdings SOC [100%]	Eskom Holdings SOC [100.0%]	-27.1006	29.771	exact	Amersfoort		Gert Sibande	Mpumalanga	https://www.gem.wiki/Majuba_power_station	L100000103449	G100000106600	ZAG000066697	1	12429		28	2036	2076	2116	3.68446e+06	3.35858e+06	3.3187e+06	3.10518e+06	3.34004e+06	3.34004e+06	3.34004e+06	3.34004e+06	3.34004e+06	3.34004e+06	3.34004e+06	3.34004e+06
coal	South Africa	Africa	Sub-Saharan Africa	Majuba power station	Unit 2			665	operating	1997	2047	subcritical	bituminous					Eskom Holdings SOC [100%]	Eskom Holdings SOC [100.0%]	-27.1006	29.771	exact	Amersfoort		Gert Sibande	Mpumalanga	https://www.gem.wiki/Majuba_power_station	L100000103449	G100000106601	ZAG000066697	1	12429		27	2037	2077	2117	3.68446e+06	3.35858e+06	3.3187e+06	3.10518e+06	3.34004e+06	3.34004e+06	3.34004e+06	3.34004e+06	3.34004e+06	3.34004e+06	3.34004e+06	3.34004e+06
coal	South Africa	Africa	Sub-Saharan Africa	Majuba power station	Unit 3			665	operating	1998	2048	subcritical	bituminous					Eskom Holdings SOC [100%]	Eskom Holdings SOC [100.0%]	-27.1006	29.771	exact	Amersfoort		Gert Sibande	Mpumalanga	https://www.gem.wiki/Majuba_power_station	L100000103449	G100000106602	ZAG000066697	1	12429		26	2038	2078	2118	3.68446e+06	3.35858e+06	3.3187e+06	3.10518e+06	3.34004e+06	3.34004e+06	3.34004e+06	3.34004e+06	3.34004e+06	3.34004e+06	3.34004e+06	3.34004e+06
coal	South Africa	Africa	Sub-Saharan Africa	Majuba power station	Unit 4			716	operating	1999	2049	subcritical	bituminous					Eskom Holdings SOC [100%]	Eskom Holdings SOC [100.0%]	-27.1006	29.771	exact	Amersfoort		Gert Sibande	Mpumalanga	https://www.gem.wiki/Majuba_power_station	L100000103449	G100000106603	ZAG000066697	1	12429		25	2039	2079	2119	3.96703e+06	3.61616e+06	3.57321e+06	3.34332e+06	3.59619e+06	3.59619e+06	3.59619e+06	3.59619e+06	3.59619e+06	3.59619e+06	3.59619e+06	3.59619e+06
coal	South Africa	Africa	Sub-Saharan Africa	Majuba power station	Unit 5			716	operating	2000	2050	subcritical	bituminous					Eskom Holdings SOC [100%]	Eskom Holdings SOC [100.0%]	-27.1006	29.771	exact	Amersfoort		Gert Sibande	Mpumalanga	https://www.gem.wiki/Majuba_power_station	L100000103449	G100000106604	ZAG000066697	1	12429		24	2040	2080	2120	3.96703e+06	3.61616e+06	3.57321e+06	3.34332e+06	3.59619e+06	3.59619e+06	3.59619e+06	3.59619e+06	3.59619e+06	3.59619e+06	3.59619e+06	3.59619e+06
coal	South Africa	Africa	Sub-Saharan Africa	Majuba power station	Unit 6			716	operating	2001	2051	subcritical	bituminous					Eskom Holdings SOC [100%]	Eskom Holdings SOC [100.0%]	-27.1006	29.771	exact	Amersfoort		Gert Sibande	Mpumalanga	https://www.gem.wiki/Majuba_power_station	L100000103449	G100000106605	ZAG000066697	1	12429	12429	23	2041	2081	2121	3.96703e+06	3.61616e+06	3.57321e+06	3.34332e+06	3.59619e+06	3.59619e+06	3.59619e+06	3.59619e+06	3.59619e+06	3.59619e+06	3.59619e+06	3.59619e+06
coal	South Africa	Africa	Sub-Saharan Africa	Matimba power station	Unit 1			665	operating	1987	2037	subcritical	bituminous					Eskom Holdings SOC [100%]	Eskom Holdings SOC [100.0%]	-23.6688	27.6108	exact	Lephalale		Waterberg	Limpopo	https://www.gem.wiki/Matimba_power_station	L100000103431	G100000106720	ZAG000066697	1	11970		37	2027	2067	2107	3.68446e+06	3.35858e+06	3.3187e+06	3.10518e+06	3.34004e+06	3.34004e+06	3.34004e+06	3.34004e+06	3.34004e+06	3.34004e+06	3.34004e+06	3.34004e+06
coal	South Africa	Africa	Sub-Saharan Africa	Matimba power station	Unit 2			665	operating	1987	2037	subcritical	bituminous					Eskom Holdings SOC [100%]	Eskom Holdings SOC [100.0%]	-23.6688	27.6108	exact	Lephalale		Waterberg	Limpopo	https://www.gem.wiki/Matimba_power_station	L100000103431	G100000106721	ZAG000066697	1	11970		37	2027	2067	2107	3.68446e+06	3.35858e+06	3.3187e+06	3.10518e+06	3.34004e+06	3.34004e+06	3.34004e+06	3.34004e+06	3.34004e+06	3.34004e+06	3.34004e+06	3.34004e+06
coal	South Africa	Africa	Sub-Saharan Africa	Matimba power station	Unit 3			665	operating	1988	2038	subcritical	bituminous					Eskom Holdings SOC [100%]	Eskom Holdings SOC [100.0%]	-23.6688	27.6108	exact	Lephalale		Waterberg	Limpopo	https://www.gem.wiki/Matimba_power_station	L100000103431	G100000106722	ZAG000066697	1	11970		36	2028	2068	2108	3.68446e+06	3.35858e+06	3.3187e+06	3.10518e+06	3.34004e+06	3.34004e+06	3.34004e+06	3.34004e+06	3.34004e+06	3.34004e+06	3.34004e+06	3.34004e+06
coal	South Africa	Africa	Sub-Saharan Africa	Matimba power station	Unit 4			665	operating	1989	2039	subcritical	bituminous					Eskom Holdings SOC [100%]	Eskom Holdings SOC [100.0%]	-23.6688	27.6108	exact	Lephalale		Waterberg	Limpopo	https://www.gem.wiki/Matimba_power_station	L100000103431	G100000106723	ZAG000066697	1	11970		35	2029	2069	2109	3.68446e+06	3.35858e+06	3.3187e+06	3.10518e+06	3.34004e+06	3.34004e+06	3.34004e+06	3.34004e+06	3.34004e+06	3.34004e+06	3.34004e+06	3.34004e+06
coal	South Africa	Africa	Sub-Saharan Africa	Matimba power station	Unit 5			665	operating	1990	2040	subcritical	bituminous					Eskom Holdings SOC [100%]	Eskom Holdings SOC [100.0%]	-23.6688	27.6108	exact	Lephalale		Waterberg	Limpopo	https://www.gem.wiki/Matimba_power_station	L100000103431	G100000106724	ZAG000066697	1	11970		34	2030	2070	2110	3.68446e+06	3.35858e+06	3.3187e+06	3.10518e+06	3.34004e+06	3.34004e+06	3.34004e+06	3.34004e+06	3.34004e+06	3.34004e+06	3.34004e+06	3.34004e+06
coal	South Africa	Africa	Sub-Saharan Africa	Matimba power station	Unit 6			665	operating	1991	2041	subcritical	bituminous					Eskom Holdings SOC [100%]	Eskom Holdings SOC [100.0%]	-23.6688	27.6108	exact	Lephalale		Waterberg	Limpopo	https://www.gem.wiki/Matimba_power_station	L100000103431	G100000106725	ZAG000066697	1	11970	11970	33	2031	2071	2111	3.68446e+06	3.35858e+06	3.3187e+06	3.10518e+06	3.34004e+06	3.34004e+06	3.34004e+06	3.34004e+06	3.34004e+06	3.34004e+06	3.34004e+06	3.34004e+06
coal	South Africa	Africa	Sub-Saharan Africa	Matla power station	Unit 1			600	operating	1979	2030	subcritical	bituminous					Eskom Holdings SOC [100%]	Eskom Holdings SOC [100.0%]	-26.2813	29.1415	exact	Kriel		Nkangala	Mpumalanga	https://www.gem.wiki/Matla_power_station	L100000103450	G100000106726	ZAG000066697	1	10800		45	2019	2059	2099	3.32433e+06	3.0303e+06	2.99431e+06	2.80167e+06	3.01357e+06	3.01357e+06	3.01357e+06	3.01357e+06	3.01357e+06	3.01357e+06	3.01357e+06	3.01357e+06
coal	South Africa	Africa	Sub-Saharan Africa	Matla power station	Unit 2			600	operating	1980	2031	subcritical	bituminous					Eskom Holdings SOC [100%]	Eskom Holdings SOC [100.0%]	-26.2813	29.1415	exact	Kriel		Nkangala	Mpumalanga	https://www.gem.wiki/Matla_power_station	L100000103450	G100000106727	ZAG000066697	1	10800		44	2020	2060	2100	3.32433e+06	3.0303e+06	2.99431e+06	2.80167e+06	3.01357e+06	3.01357e+06	3.01357e+06	3.01357e+06	3.01357e+06	3.01357e+06	3.01357e+06	3.01357e+06
coal	South Africa	Africa	Sub-Saharan Africa	Matla power station	Unit 3			600	operating	1980	2031	subcritical	bituminous					Eskom Holdings SOC [100%]	Eskom Holdings SOC [100.0%]	-26.2813	29.1415	exact	Kriel		Nkangala	Mpumalanga	https://www.gem.wiki/Matla_power_station	L100000103450	G100000106728	ZAG000066697	1	10800		44	2020	2060	2100	3.32433e+06	3.0303e+06	2.99431e+06	2.80167e+06	3.01357e+06	3.01357e+06	3.01357e+06	3.01357e+06	3.01357e+06	3.01357e+06	3.01357e+06	3.01357e+06
coal	South Africa	Africa	Sub-Saharan Africa	Matla power station	Unit 4			600	operating	1981	2032	subcritical	bituminous					Eskom Holdings SOC [100%]	Eskom Holdings SOC [100.0%]	-26.2813	29.1415	exact	Kriel		Nkangala	Mpumalanga	https://www.gem.wiki/Matla_power_station	L100000103450	G100000106729	ZAG000066697	1	10800		43	2021	2061	2101	3.32433e+06	3.0303e+06	2.99431e+06	2.80167e+06	3.01357e+06	3.01357e+06	3.01357e+06	3.01357e+06	3.01357e+06	3.01357e+06	3.01357e+06	3.01357e+06
coal	South Africa	Africa	Sub-Saharan Africa	Matla power station	Unit 5			600	operating	1982	2033	subcritical	bituminous					Eskom Holdings SOC [100%]	Eskom Holdings SOC [100.0%]	-26.2813	29.1415	exact	Kriel		Nkangala	Mpumalanga	https://www.gem.wiki/Matla_power_station	L100000103450	G100000106730	ZAG000066697	1	10800		42	2022	2062	2102	3.32433e+06	3.0303e+06	2.99431e+06	2.80167e+06	3.01357e+06	3.01357e+06	3.01357e+06	3.01357e+06	3.01357e+06	3.01357e+06	3.01357e+06	3.01357e+06
coal	South Africa	Africa	Sub-Saharan Africa	Matla power station	Unit 6			600	operating	1983	2034	subcritical	bituminous					Eskom Holdings SOC [100%]	Eskom Holdings SOC [100.0%]	-26.2813	29.1415	exact	Kriel		Nkangala	Mpumalanga	https://www.gem.wiki/Matla_power_station	L100000103450	G100000106731	ZAG000066697	1	10800	10800	41	2023	2063	2103	3.32433e+06	3.0303e+06	2.99431e+06	2.80167e+06	3.01357e+06	3.01357e+06	3.01357e+06	3.01357e+06	3.01357e+06	3.01357e+06	3.01357e+06	3.01357e+06
coal	South Africa	Africa	Sub-Saharan Africa	Medupi power station	Unit 1			794.8	operating	2021	2071	supercritical	bituminous					Eskom Holdings SOC [100%]	Eskom Holdings SOC [100.0%]	-23.705	27.5638	exact	Lephalale			Limpopo	https://www.gem.wiki/Medupi_power_station	L100000103432	G100000106780	ZAG000066697	1	14306.4		3	2061	2101	2141	0	4.01414e+06	3.96646e+06	3.71128e+06	3.99198e+06	3.99198e+06	3.99198e+06	3.99198e+06	3.99198e+06	3.99198e+06	3.99198e+06	3.99198e+06
coal	South Africa	Africa	Sub-Saharan Africa	Medupi power station	Unit 2			794.8	operating	2019	2069	supercritical	bituminous					Eskom Holdings SOC [100%]	Eskom Holdings SOC [100.0%]	-23.705	27.5638	exact	Lephalale			Limpopo	https://www.gem.wiki/Medupi_power_station	L100000103432	G100000106781	ZAG000066697	1	14306.4		5	2059	2099	2139	4.40362e+06	4.01414e+06	3.96646e+06	3.71128e+06	3.99198e+06	3.99198e+06	3.99198e+06	3.99198e+06	3.99198e+06	3.99198e+06	3.99198e+06	3.99198e+06
coal	South Africa	Africa	Sub-Saharan Africa	Medupi power station	Unit 3			794.8	operating	2019	2068	supercritical	bituminous					Eskom Holdings SOC [100%]	Eskom Holdings SOC [100.0%]	-23.705	27.5638	exact	Lephalale			Limpopo	https://www.gem.wiki/Medupi_power_station	L100000103432	G100000106782	ZAG000066697	1	14306.4		5	2059	2099	2139	4.40362e+06	4.01414e+06	3.96646e+06	3.71128e+06	3.99198e+06	3.99198e+06	3.99198e+06	3.99198e+06	3.99198e+06	3.99198e+06	3.99198e+06	3.99198e+06
coal	South Africa	Africa	Sub-Saharan Africa	Medupi power station	Unit 4			794.8	operating	2017	2067	supercritical	bituminous					Eskom Holdings SOC [100%]	Eskom Holdings SOC [100.0%]	-23.705	27.5638	exact	Lephalale			Limpopo	https://www.gem.wiki/Medupi_power_station	L100000103432	G100000106783	ZAG000066697	1	14306.4		7	2057	2097	2137	4.40362e+06	4.01414e+06	3.96646e+06	3.71128e+06	3.99198e+06	3.99198e+06	3.99198e+06	3.99198e+06	3.99198e+06	3.99198e+06	3.99198e+06	3.99198e+06
coal	South Africa	Africa	Sub-Saharan Africa	Medupi power station	Unit 5			794.8	operating	2017	2067	supercritical	bituminous					Eskom Holdings SOC [100%]	Eskom Holdings SOC [100.0%]	-23.705	27.5638	exact	Lephalale			Limpopo	https://www.gem.wiki/Medupi_power_station	L100000103432	G100000106784	ZAG000066697	1	14306.4		7	2057	2097	2137	4.40362e+06	4.01414e+06	3.96646e+06	3.71128e+06	3.99198e+06	3.99198e+06	3.99198e+06	3.99198e+06	3.99198e+06	3.99198e+06	3.99198e+06	3.99198e+06
coal	South Africa	Africa	Sub-Saharan Africa	Medupi power station	Unit 6			794.8	operating	2015	2065	supercritical	bituminous					Eskom Holdings SOC [100%]	Eskom Holdings SOC [100.0%]	-23.705	27.5638	exact	Lephalale			Limpopo	https://www.gem.wiki/Medupi_power_station	L100000103432	G100000106785	ZAG000066697	1	14306.4	14306.4	9	2055	2095	2135	4.40362e+06	4.01414e+06	3.96646e+06	3.71128e+06	3.99198e+06	3.99198e+06	3.99198e+06	3.99198e+06	3.99198e+06	3.99198e+06	3.99198e+06	3.99198e+06
coal	South Africa	Africa	Sub-Saharan Africa	Tutuka power station	Unit 1			609	operating	1985	2035	subcritical	bituminous					Eskom Holdings SOC [100%]	Eskom Holdings SOC [100.0%]	-26.7772	29.3524	exact	Standerton		Gert Sibande	Mpumalanga	https://www.gem.wiki/Tutuka_power_station	L100000103452	G100000110396	ZAG000066697	1	10962		39	2025	2065	2105	3.37419e+06	3.07575e+06	3.03923e+06	2.84369e+06	3.05877e+06	3.05877e+06	3.05877e+06	3.05877e+06	3.05877e+06	3.05877e+06	3.05877e+06	3.05877e+06
coal	South Africa	Africa	Sub-Saharan Africa	Tutuka power station	Unit 2			609	operating	1985	2035	subcritical	bituminous					Eskom Holdings SOC [100%]	Eskom Holdings SOC [100.0%]	-26.7772	29.3524	exact	Standerton		Gert Sibande	Mpumalanga	https://www.gem.wiki/Tutuka_power_station	L100000103452	G100000110397	ZAG000066697	1	10962		39	2025	2065	2105	3.37419e+06	3.07575e+06	3.03923e+06	2.84369e+06	3.05877e+06	3.05877e+06	3.05877e+06	3.05877e+06	3.05877e+06	3.05877e+06	3.05877e+06	3.05877e+06
coal	South Africa	Africa	Sub-Saharan Africa	Tutuka power station	Unit 3			609	operating	1986	2036	subcritical	bituminous					Eskom Holdings SOC [100%]	Eskom Holdings SOC [100.0%]	-26.7772	29.3524	exact	Standerton		Gert Sibande	Mpumalanga	https://www.gem.wiki/Tutuka_power_station	L100000103452	G100000110398	ZAG000066697	1	10962		38	2026	2066	2106	3.37419e+06	3.07575e+06	3.03923e+06	2.84369e+06	3.05877e+06	3.05877e+06	3.05877e+06	3.05877e+06	3.05877e+06	3.05877e+06	3.05877e+06	3.05877e+06
coal	South Africa	Africa	Sub-Saharan Africa	Tutuka power station	Unit 4			609	operating	1987	2037	subcritical	bituminous					Eskom Holdings SOC [100%]	Eskom Holdings SOC [100.0%]	-26.7772	29.3524	exact	Standerton		Gert Sibande	Mpumalanga	https://www.gem.wiki/Tutuka_power_station	L100000103452	G100000110399	ZAG000066697	1	10962		37	2027	2067	2107	3.37419e+06	3.07575e+06	3.03923e+06	2.84369e+06	3.05877e+06	3.05877e+06	3.05877e+06	3.05877e+06	3.05877e+06	3.05877e+06	3.05877e+06	3.05877e+06
coal	South Africa	Africa	Sub-Saharan Africa	Tutuka power station	Unit 5			609	operating	1988	2038	subcritical	bituminous					Eskom Holdings SOC [100%]	Eskom Holdings SOC [100.0%]	-26.7772	29.3524	exact	Standerton		Gert Sibande	Mpumalanga	https://www.gem.wiki/Tutuka_power_station	L100000103452	G100000110400	ZAG000066697	1	10962		36	2028	2068	2108	3.37419e+06	3.07575e+06	3.03923e+06	2.84369e+06	3.05877e+06	3.05877e+06	3.05877e+06	3.05877e+06	3.05877e+06	3.05877e+06	3.05877e+06	3.05877e+06
coal	South Africa	Africa	Sub-Saharan Africa	Tutuka power station	Unit 6			609	operating	1990	2040	subcritical	bituminous					Eskom Holdings SOC [100%]	Eskom Holdings SOC [100.0%]	-26.7772	29.3524	exact	Standerton		Gert Sibande	Mpumalanga	https://www.gem.wiki/Tutuka_power_station	L100000103452	G100000110401	ZAG000066697	1	10962	10962	34	2030	2070	2110	3.37419e+06	3.07575e+06	3.03923e+06	2.84369e+06	3.05877e+06	3.05877e+06	3.05877e+06	3.05877e+06	3.05877e+06	3.05877e+06	3.05877e+06	3.05877e+06
oil/gas	South Africa	Africa	Sub-Saharan Africa	Acacia power station	1			57	operating	1976		GT	KER					Eskom Holdings SOC Ltd [100.0%]	Eskom Holdings SOC Ltd [100.0%]	-33.8831	18.5358	exact	Cape Town			Western Cape	https://www.gem.wiki/Acacia_power_station	L100000408170	G100000411354	ZAG000066697	1	513		48	2016	2056	2096	83253.5	83253.5	83253.5	83253.5	83253.5	83253.5	83253.5	83253.5	83253.5	83253.5	83253.5	83253.5
oil/gas	South Africa	Africa	Sub-Saharan Africa	Acacia power station	2			57	operating	1976		GT	KER					Eskom Holdings SOC Ltd [100.0%]	Eskom Holdings SOC Ltd [100.0%]	-33.8831	18.5358	exact	Cape Town			Western Cape	https://www.gem.wiki/Acacia_power_station	L100000408170	G100000411353	ZAG000066697	1	513		48	2016	2056	2096	83253.5	83253.5	83253.5	83253.5	83253.5	83253.5	83253.5	83253.5	83253.5	83253.5	83253.5	83253.5
oil/gas	South Africa	Africa	Sub-Saharan Africa	Acacia power station	3			57	operating	1976		GT	KER					Eskom Holdings SOC Ltd [100.0%]	Eskom Holdings SOC Ltd [100.0%]	-33.8831	18.5358	exact	Cape Town			Western Cape	https://www.gem.wiki/Acacia_power_station	L100000408170	G100000411352	ZAG000066697	1	513	513	48	2016	2056	2096	83253.5	83253.5	83253.5	83253.5	83253.5	83253.5	83253.5	83253.5	83253.5	83253.5	83253.5	83253.5
oil/gas	South Africa	Africa	Sub-Saharan Africa	Ankerlig power station	1-1			149.2	operating	2007		GT	D					Eskom Holdings SOC Ltd [100.0%]	Eskom Holdings SOC Ltd [100.0%]	-33.5895	18.4615	exact	Atlantis			Western Cape	https://www.gem.wiki/Ankerlig_power_station	L100000407107	G100000408556	ZAG000066697	1	4014.9		17	2047	2087	2127	217920	217920	217920	217920	217920	217920	217920	217920	217920	217920	217920	217920
oil/gas	South Africa	Africa	Sub-Saharan Africa	Ankerlig power station	1-2			149.2	operating	2007		GT	D					Eskom Holdings SOC Ltd [100.0%]	Eskom Holdings SOC Ltd [100.0%]	-33.5895	18.4615	exact	Atlantis			Western Cape	https://www.gem.wiki/Ankerlig_power_station	L100000407107	G100000414357	ZAG000066697	1	4014.9		17	2047	2087	2127	217920	217920	217920	217920	217920	217920	217920	217920	217920	217920	217920	217920
oil/gas	South Africa	Africa	Sub-Saharan Africa	Ankerlig power station	1-3			149.2	operating	2007		GT	D					Eskom Holdings SOC Ltd [100.0%]	Eskom Holdings SOC Ltd [100.0%]	-33.5895	18.4615	exact	Atlantis			Western Cape	https://www.gem.wiki/Ankerlig_power_station	L100000407107	G100000414356	ZAG000066697	1	4014.9		17	2047	2087	2127	217920	217920	217920	217920	217920	217920	217920	217920	217920	217920	217920	217920
oil/gas	South Africa	Africa	Sub-Saharan Africa	Ankerlig power station	1-4			149.2	operating	2007		GT	D					Eskom Holdings SOC Ltd [100.0%]	Eskom Holdings SOC Ltd [100.0%]	-33.5895	18.4615	exact	Atlantis			Western Cape	https://www.gem.wiki/Ankerlig_power_station	L100000407107	G100000414355	ZAG000066697	1	4014.9		17	2047	2087	2127	217920	217920	217920	217920	217920	217920	217920	217920	217920	217920	217920	217920
oil/gas	South Africa	Africa	Sub-Saharan Africa	Ankerlig power station	2-1			148.3	operating	2009		GT	D					Eskom Holdings SOC Ltd [100.0%]	Eskom Holdings SOC Ltd [100.0%]	-33.5895	18.4615	exact	Atlantis			Western Cape	https://www.gem.wiki/Ankerlig_power_station	L100000407107	G100000413925	ZAG000066697	1	4014.9		15	2049	2089	2129	216605	216605	216605	216605	216605	216605	216605	216605	216605	216605	216605	216605
oil/gas	South Africa	Africa	Sub-Saharan Africa	Ankerlig power station	2-2			148.3	operating	2009		GT	D					Eskom Holdings SOC Ltd [100.0%]	Eskom Holdings SOC Ltd [100.0%]	-33.5895	18.4615	exact	Atlantis			Western Cape	https://www.gem.wiki/Ankerlig_power_station	L100000407107	G100000414354	ZAG000066697	1	4014.9		15	2049	2089	2129	216605	216605	216605	216605	216605	216605	216605	216605	216605	216605	216605	216605
oil/gas	South Africa	Africa	Sub-Saharan Africa	Ankerlig power station	2-3			148.3	operating	2009		GT	D					Eskom Holdings SOC Ltd [100.0%]	Eskom Holdings SOC Ltd [100.0%]	-33.5895	18.4615	exact	Atlantis			Western Cape	https://www.gem.wiki/Ankerlig_power_station	L100000407107	G100000414353	ZAG000066697	1	4014.9		15	2049	2089	2129	216605	216605	216605	216605	216605	216605	216605	216605	216605	216605	216605	216605
oil/gas	South Africa	Africa	Sub-Saharan Africa	Ankerlig power station	2-4			148.3	operating	2009		GT	D					Eskom Holdings SOC Ltd [100.0%]	Eskom Holdings SOC Ltd [100.0%]	-33.5895	18.4615	exact	Atlantis			Western Cape	https://www.gem.wiki/Ankerlig_power_station	L100000407107	G100000414352	ZAG000066697	1	4014.9		15	2049	2089	2129	216605	216605	216605	216605	216605	216605	216605	216605	216605	216605	216605	216605
oil/gas	South Africa	Africa	Sub-Saharan Africa	Ankerlig power station	2-5			148.3	operating	2009		GT	D					Eskom Holdings SOC Ltd [100.0%]	Eskom Holdings SOC Ltd [100.0%]	-33.5895	18.4615	exact	Atlantis			Western Cape	https://www.gem.wiki/Ankerlig_power_station	L100000407107	G100000414351	ZAG000066697	1	4014.9	4014.9	15	2049	2089	2129	216605	216605	216605	216605	216605	216605	216605	216605	216605	216605	216605	216605
oil/gas	South Africa	Africa	Sub-Saharan Africa	Gourikwa power station	1			148	operating	2007		GT	D					Eskom Holdings SOC Ltd [100.0%]	Eskom Holdings SOC Ltd [100.0%]	-34.1668	21.9607	exact	Mossel Bay			Western Cape	https://www.gem.wiki/Gourikwa_power_station	L100000407108	G100000408557	ZAG000066697	1	2220		17	2047	2087	2127	216167	216167	216167	216167	216167	216167	216167	216167	216167	216167	216167	216167
oil/gas	South Africa	Africa	Sub-Saharan Africa	Gourikwa power station	2			148	operating	2007		GT	D					Eskom Holdings SOC Ltd [100.0%]	Eskom Holdings SOC Ltd [100.0%]	-34.1668	21.9607	exact	Mossel Bay			Western Cape	https://www.gem.wiki/Gourikwa_power_station	L100000407108	G100000410887	ZAG000066697	1	2220		17	2047	2087	2127	216167	216167	216167	216167	216167	216167	216167	216167	216167	216167	216167	216167
oil/gas	South Africa	Africa	Sub-Saharan Africa	Gourikwa power station	3			148	operating	2007		GT	D					Eskom Holdings SOC Ltd [100.0%]	Eskom Holdings SOC Ltd [100.0%]	-34.1668	21.9607	exact	Mossel Bay			Western Cape	https://www.gem.wiki/Gourikwa_power_station	L100000407108	G100000410886	ZAG000066697	1	2220		17	2047	2087	2127	216167	216167	216167	216167	216167	216167	216167	216167	216167	216167	216167	216167
oil/gas	South Africa	Africa	Sub-Saharan Africa	Gourikwa power station	4			148	operating	2009		GT	D					Eskom Holdings SOC Ltd [100.0%]	Eskom Holdings SOC Ltd [100.0%]	-34.1668	21.9607	exact	Mossel Bay			Western Cape	https://www.gem.wiki/Gourikwa_power_station	L100000407108	G100000410885	ZAG000066697	1	2220		15	2049	2089	2129	216167	216167	216167	216167	216167	216167	216167	216167	216167	216167	216167	216167
oil/gas	South Africa	Africa	Sub-Saharan Africa	Gourikwa power station	5			148	operating	2009		GT	D					Eskom Holdings SOC Ltd [100.0%]	Eskom Holdings SOC Ltd [100.0%]	-34.1668	21.9607	exact	Mossel Bay			Western Cape	https://www.gem.wiki/Gourikwa_power_station	L100000407108	G100000410884	ZAG000066697	1	2220	2220	15	2049	2089	2129	216167	216167	216167	216167	216167	216167	216167	216167	216167	216167	216167	216167
oil/gas	South Africa	Africa	Sub-Saharan Africa	Port Rex power station	4			57	operating	1976		GT	KER					Eskom Holdings SOC Ltd [100.0%]	Eskom Holdings SOC Ltd [100.0%]	-33.028	27.8818	exact	East London				https://www.gem.wiki/Port_Rex_power_station	L100000408172	G100000411351	ZAG000066697	1	513		48	2016	2056	2096	83253.5	83253.5	83253.5	83253.5	83253.5	83253.5	83253.5	83253.5	83253.5	83253.5	83253.5	83253.5
oil/gas	South Africa	Africa	Sub-Saharan Africa	Port Rex power station	5			57	operating	1976		GT	KER					Eskom Holdings SOC Ltd [100.0%]	Eskom Holdings SOC Ltd [100.0%]	-33.028	27.8818	exact	East London				https://www.gem.wiki/Port_Rex_power_station	L100000408172	G100000411350	ZAG000066697	1	513		48	2016	2056	2096	83253.5	83253.5	83253.5	83253.5	83253.5	83253.5	83253.5	83253.5	83253.5	83253.5	83253.5	83253.5
oil/gas	South Africa	Africa	Sub-Saharan Africa	Port Rex power station	6			57	operating	1976		GT	KER					Eskom Holdings SOC Ltd [100.0%]	Eskom Holdings SOC Ltd [100.0%]	-33.028	27.8818	exact	East London				https://www.gem.wiki/Port_Rex_power_station	L100000408172	G100000411349	ZAG000066697	1	513	513	48	2016	2056	2096	83253.5	83253.5	83253.5	83253.5	83253.5	83253.5	83253.5	83253.5	83253.5	83253.5	83253.5	83253.5
oil/gas	South Africa	Africa	Sub-Saharan Africa	Richards Bay (Eskom) power station	1			3000	pre-construction			CC	LNG					Eskom Holdings SOC Ltd [100.0%]	Eskom Holdings SOC Ltd [100.0%]	-28.771	31.9765	exact	Richards Bay			KwaZulu-Natal	https://www.gem.wiki/Richards_Bay_(Eskom)_power_station	L100000407360	G100000409408	ZAG000066697	1	9000	9000	-99	40	80	120	0	0	0	0	0	0	0	0	0	1.2578e+06	1.2578e+06	1.2578e+06
																																					TOTAL Carbon Emissions	234.781	222.382	218.785	204.937	224.203	228.221	228.221	228.221	228.221	229.478	229.478	229.478
																																					COAL	231.246	218.847	215.25	201.402	220.668	224.686	224.686	224.686	224.686	224.686	224.686	224.686
																																					GAS	0	0	0	0	0	0	0	0	0	0	0	0
																																					OIL	3.03554	3.03554	3.03554	3.03554	3.03554	3.03554	3.03554	3.03554	3.03554	3.03554	3.03554	3.03554
																																					OIL&GAS	3.53506	3.53506	3.53506	3.53506	3.53506	3.53506	3.53506	3.53506	3.53506	4.79286	4.79286	4.79286
[truncated: 28 more columns]
